# Supplementary material for: An X-linked long non-coding RNA, PTCHD1-AS, regulates autistic behaviors in humans and in mice
Source: Research Square preprint supplement (doi:10.21203/rs.3.rs-5619348/v1), 2025-01-13
Supplement: Supplementary file 1 [file Supplementary Table 10.xlsx]

## Sheet: D1_MSN
ensembl	gene	p_val.mean	p_val.std	avg_log2FC.mean	avg_log2FC.std	pct.1.mean	pct.2.mean	padj.mean	padj.std	ASD.status	TADA.FDR	EAGLE.annotation	EAGLE.score	EAGLE.concordance	SFARI.score	SFARI.syndromic
ENSMUSG00000020719	Ddx5	1.53665e-18	3.4256e-18	0.331283	0.0196222	0.986	0.963	4.65327e-14	1.03734e-13
ENSMUSG00000019505	Ubb	6.0002e-17	1.08971e-16	0.44475	0.0201161	0.5678	0.3816	1.81698e-12	3.29985e-12
ENSMUSG00000092341	Malat1	7.55789e-15	1.60302e-14	-0.190461	0.0139034	1	1	2.28868e-10	4.85427e-10
ENSMUSG00000001270	Ckb	1.03987e-14	1.91156e-14	0.42739	0.0273255	0.7906	0.6858	3.14895e-10	5.78859e-10
ENSMUSG00000021268	Meg3	9.07386e-11	1.28988e-10	0.169906	0.00669464	0.9996	1	2.74775e-06	3.90602e-06
ENSMUSG00000032936	Camkv	1.45233e-10	3.17543e-10	0.299329	0.0332498	0.8302	0.7354	4.39795e-06	9.61584e-06
ENSMUSG00000026204	Ptprn	1.69956e-09	3.20122e-09	0.28941	0.0193167	0.803	0.7096	5.1466e-05	9.69393e-05
ENSMUSG00000098973	Mir6236	2.47935e-09	3.8904e-09	0.366971	0.0265529	0.8614	0.8236	7.50797e-05	0.000117809
ENSMUSG00000030695	Aldoa	7.79218e-09	7.22067e-09	0.256705	0.0177203	0.4868	0.3458	0.000235963	0.000218656
ENSMUSG00000008658	Rbfox1	8.67707e-09	1.70457e-08	-0.16868	0.0117356	1	1	0.000262759	0.000516178	SFARI					2	0
ENSMUSG00000063511	Snrnp70	1.08521e-08	1.54422e-08	0.260726	0.0248008	0.8438	0.7804	0.000328625	0.000467621
ENSMUSG00000015656	Hspa8	3.16499e-08	6.00114e-08	0.280576	0.018138	0.5164	0.3954	0.000958423	0.00181727
ENSMUSG00000036564	Ndrg4	3.17425e-08	6.25116e-08	0.236855	0.0236177	0.8528	0.7832	0.000961227	0.00189298
ENSMUSG00000057666	Gapdh	3.52847e-08	7.59095e-08	0.301766	0.0330385	0.501	0.3776	0.00106849	0.00229869
ENSMUSG00000017491	Rarb	4.15098e-08	5.6021e-08	-0.196713	0.0121422	0.9652	0.9816	0.001257	0.00169643
ENSMUSG00000033510	Otud7a	7.64667e-08	1.52166e-07	-0.251419	0.0187335	0.6242	0.7284	0.00231556	0.00460789	SFARI					2	0
ENSMUSG00000021910	Nisch	1.47858e-07	3.25323e-07	0.253534	0.0214311	0.629	0.5174	0.00447744	0.00985144
ENSMUSG00000002459	Rgs20	1.50547e-07	1.89116e-07	-0.259027	0.0527753	0.7356	0.8268	0.00455885	0.0057268
ENSMUSG00000035885	Cox8a	1.91284e-07	2.62076e-07	0.27404	0.0344616	0.3808	0.258	0.00579246	0.00793619
ENSMUSG00000045671	Spred2	2.97896e-07	3.97592e-07	-0.222345	0.0219342	0.445	0.5766	0.00902087	0.0120399
ENSMUSG00000030064	Frmd4b	3.14488e-07	6.58338e-07	-0.264663	0.0155354	0.4796	0.608	0.00952333	0.0199358
ENSMUSG00000023944	Hsp90ab1	3.96697e-07	7.2464e-07	0.245176	0.0340471	0.6116	0.5046	0.0120128	0.0219435
ENSMUSG00000060924	Csmd1	4.13651e-07	8.33196e-07	-0.132741	0.00983893	1	1	0.0125262	0.0252308	SFARI					2	0
ENSMUSG00000026576	Atp1b1	5.59232e-07	1.07422e-06	0.249461	0.0288747	0.7552	0.6778	0.0169347	0.0325296
ENSMUSG00000038128	Camk4	7.59398e-07	1.1096e-06	-0.185769	0.0205995	0.9318	0.9706	0.0229961	0.0336009	SFARI					2	0
ENSMUSG00000036298	Slc2a13	8.02601e-07	1.04431e-06	-0.191277	0.0294131	0.7986	0.8672	0.0243044	0.0316238
ENSMUSG00000044667	Plppr4	1.31002e-06	1.48962e-06	0.226128	0.0120264	0.8054	0.7514	0.0396701	0.0451088
ENSMUSG00000031833	Mast3	1.42441e-06	2.38703e-06	0.253801	0.0155313	0.525	0.4174	0.043134	0.0722842	SFARI					3	0
ENSMUSG00000033307	Mif	1.45852e-06	1.22538e-06	0.159744	0.00987878	0.202	0.11	0.044167	0.0371071
ENSMUSG00000022748	Cmss1	1.82605e-06	4.07535e-06	0.286591	0.0331481	0.8552	0.8264	0.0552965	0.12341
ENSMUSG00000024121	Atp6v0c	2.33866e-06	2.49825e-06	0.246027	0.0120561	0.5338	0.4392	0.0708194	0.0756521
ENSMUSG00000029713	Gnb2	3.05728e-06	6.77636e-06	0.226899	0.0128403	0.4386	0.3162	0.0925807	0.205202	SFARI						1
ENSMUSG00000033585	Ndn	3.07184e-06	3.53339e-06	0.11058	0.0129229	0.1202	0.0486	0.0930215	0.106998
ENSMUSG00000034892	Rps29	3.34784e-06	5.89669e-06	0.193199	0.0186708	0.2908	0.1854	0.101379	0.178564
ENSMUSG00000097391	Mirg	4.34074e-06	5.43385e-06	0.235004	0.0184495	0.7176	0.6596	0.131446	0.164548
ENSMUSG00000107872	Gm44511	6.05488e-06	8.47555e-06	0.187025	0.0124473	0.5926	0.5108	0.183354	0.256657
ENSMUSG00000066189	Cacng3	6.44938e-06	5.93478e-06	-0.213833	0.0157354	0.6126	0.6976	0.1953	0.179717
ENSMUSG00000052551	Adarb2	6.64084e-06	1.07866e-05	-0.238728	0.0286742	0.2846	0.3936	0.201098	0.32664
ENSMUSG00000058740	Kcnt1	6.84915e-06	7.01057e-06	0.227658	0.0143844	0.7128	0.647	0.207406	0.212294
ENSMUSG00000025537	Phkg1	7.2819e-06	6.74467e-06	0.218776	0.0175393	0.158	0.0832	0.22051	0.204242
ENSMUSG00000021448	Shc3	7.35821e-06	1.11098e-05	-0.208432	0.0181767	0.3716	0.4756	0.222821	0.336427
ENSMUSG00000045349	Sh2d5	7.81368e-06	1.59431e-05	0.199138	0.0172955	0.5562	0.4458	0.216789	0.438523
ENSMUSG00000033981	Gria2	9.15403e-06	1.42521e-05	0.128627	0.00930438	1	0.9998	0.277187	0.431551	SFARI;EAGLE;TADA	0.0666362	Definitive	12	Concordant	1	0
ENSMUSG00000007892	Rplp1	1.02175e-05	2.09709e-05	0.227107	0.0223734	0.4094	0.3042	0.220737	0.437297
ENSMUSG00000057378	Ryr3	1.23551e-05	2.69036e-05	-0.168473	0.0238366	0.996	0.9982	0.20787	0.442991
ENSMUSG00000097545	Mir124a-1hg	1.68035e-05	1.93792e-05	0.201847	0.0204623	0.71	0.624	0.450759	0.497755
ENSMUSG00000033161	Atp1a1	1.99874e-05	4.46242e-05	0.201614	0.0327598	0.4336	0.3082	0.200747	0.446797	SFARI					2	1
ENSMUSG00000039218	Srrm2	2.1319e-05	3.50961e-05	0.169921	0.019358	0.8458	0.8074	0.340417	0.400837	SFARI					2	1
ENSMUSG00000061518	Cox5b	2.65222e-05	5.04036e-05	0.166099	0.0179001	0.2654	0.1718	0.297532	0.404354
ENSMUSG00000014313	Cox6c	2.67464e-05	2.55953e-05	0.193521	0.0129482	0.3306	0.2412	0.554475	0.422716
ENSMUSG00000062825	Actg1	2.79965e-05	4.96224e-05	0.160172	0.0148621	0.3498	0.2474	0.342347	0.386818
ENSMUSG00000035202	Lars2	3.12052e-05	3.99739e-05	0.221276	0.0196881	0.5652	0.4752	0.45775	0.49829
ENSMUSG00000029673	Auts2	3.19164e-05	3.14559e-05	-0.132212	0.0205057	0.9996	0.9992	0.601655	0.545457	SFARI;EAGLE;TADA	0.0046251	Definitive	35.5	Concordant	1	0
ENSMUSG00000066392	Nrxn3	3.20467e-05	5.92872e-05	-0.112617	0.0111773	1	1	0.337194	0.411017	SFARI;EAGLE		Moderate	11.1	Discordant	1	0
ENSMUSG00000038267	Slc22a23	3.38852e-05	5.09067e-05	-0.179007	0.0319807	0.5142	0.6238	0.409653	0.538996
ENSMUSG00000032238	Rora	3.40386e-05	5.4798e-05	-0.177189	0.0223352	0.987	0.9924	0.446625	0.507919	SFARI						1
ENSMUSG00000034265	Zdhhc14	3.68414e-05	2.95414e-05	-0.174588	0.0179981	0.8066	0.868	0.686373	0.337576
ENSMUSG00000064115	Cadm2	3.73062e-05	2.60784e-05	-0.112053	0.00518691	1	1	0.786277	0.262513	SFARI					2	0
ENSMUSG00000026864	Hspa5	3.74098e-05	3.57657e-05	0.161698	0.0124148	0.3328	0.2384	0.673263	0.391601
ENSMUSG00000026737	Pip4k2a	3.88169e-05	4.8479e-05	-0.122386	0.0170239	0.225	0.333	0.511006	0.469411
ENSMUSG00000036427	Gpi1	4.14581e-05	3.63335e-05	0.185049	0.0236508	0.4914	0.3932	0.705621	0.433753
ENSMUSG00000061576	Dpp6	4.19198e-05	4.80945e-05	-0.171465	0.0221927	0.9452	0.9584	0.544489	0.47514	SFARI					2	0
ENSMUSG00000097736	9530059O14Rik	4.73515e-05	9.78587e-05	-0.206199	0.0251704	0.8314	0.8906	0.28738	0.407904
ENSMUSG00000029580	Actb	4.90804e-05	6.87685e-05	0.206974	0.017423	0.5382	0.46	0.566555	0.406531	SFARI;EAGLE		Limited	1	Discordant	1	1
ENSMUSG00000045404	Kcnk13	5.61063e-05	9.69706e-05	-0.163442	0.0251865	0.1156	0.1996	0.432237	0.521431
ENSMUSG00000053465	Hs6st3	6.41823e-05	9.13953e-05	-0.181833	0.0235395	0.9556	0.9632	0.447036	0.509268
ENSMUSG00000046709	Mapk10	7.37168e-05	8.43729e-05	-0.188151	0.0172916	0.7652	0.8212	0.719339	0.394947
ENSMUSG00000054728	Phactr1	7.45409e-05	5.04729e-05	-0.100025	0.0111861	1	0.9996	0.818624	0.405569
ENSMUSG00000061904	Slc25a3	8.1021e-05	0.000174985	0.246223	0.0346448	0.6278	0.552	0.267516	0.428148
ENSMUSG00000027827	Kcnab1	8.83326e-05	0.00015068	-0.179201	0.0293571	0.9748	0.9866	0.415305	0.534191
ENSMUSG00000018770	Atp5g3	8.95205e-05	0.000118872	0.126424	0.0128293	0.2422	0.1556	0.515264	0.453795
ENSMUSG00000052942	Glis3	9.25976e-05	9.16783e-05	0.122557	0.0130258	0.1218	0.06	0.745474	0.430614
ENSMUSG00000025790	Slco3a1	0.000100224	0.000101154	-0.121932	0.013461	0.1912	0.2826	0.700257	0.445699
ENSMUSG00000040907	Atp1a3	0.000110949	0.000193143	0.211602	0.028196	0.5592	0.473	0.553405	0.449244	SFARI					2	1
ENSMUSG00000032330	Cox7a2	0.000111682	0.00024459	0.157977	0.0264824	0.2336	0.1458	0.255729	0.418968
ENSMUSG00000060126	Tpt1	0.000113976	0.000161094	0.134253	0.0189992	0.2036	0.126	0.801456	0.443957
ENSMUSG00000019039	Dalrd3	0.000116689	0.000110013	0.192639	0.0128642	0.5924	0.5106	0.827401	0.341542
ENSMUSG00000038349	Plcl1	0.000117417	0.000157239	-0.278068	0.0225327	0.155	0.2334	0.640868	0.411861
ENSMUSG00000059439	Bcas3	0.00012066	0.000121969	-0.159572	0.019797	0.6042	0.7076	0.654168	0.475716
ENSMUSG00000029651	Mtus2	0.000121597	0.000122728	-0.151026	0.0237093	0.4372	0.5388	0.812523	0.419211
ENSMUSG00000016319	Slc25a5	0.000136565	0.000180712	0.162867	0.00961226	0.2766	0.1974	0.817488	0.279051
ENSMUSG00000071528	Atp5md	0.000171558	0.000368266	0.175399	0.0277676	0.2758	0.1834	0.367646	0.456998
ENSMUSG00000039001	Rps21	0.00018745	0.000279527	0.154768	0.0168348	0.2452	0.1646	0.540283	0.429735
ENSMUSG00000055254	Ntrk2	0.000190538	0.000207796	-0.231998	0.0312817	0.7658	0.8042	1	0	SFARI						1
ENSMUSG00000063568	Jazf1	0.000198188	0.000341915	-0.146502	0.0164378	0.5	0.609	0.764276	0.327709
ENSMUSG00000031865	Dctn1	0.00019952	0.000321743	0.208622	0.0270041	0.477	0.3934	0.440614	0.51161
ENSMUSG00000074505	Fat3	0.000202561	0.000401821	-0.172438	0.023607	0.8838	0.9324	0.490049	0.466827
ENSMUSG00000029657	Hsph1	0.000205063	0.000223717	0.142944	0.014126	0.3398	0.2512	0.647015	0.486044
ENSMUSG00000055013	Agap1	0.000211275	0.000321565	-0.156819	0.0123588	0.6066	0.6878	0.79832	0.285171	SFARI					2	0
ENSMUSG00000057322	Rpl38	0.000216917	0.000254962	0.117888	0.0121395	0.1764	0.1088	0.957736	0.0945045
ENSMUSG00000040385	Ppp1ca	0.000234897	0.000466696	0.126557	0.0149106	0.2678	0.1814	0.742879	0.353531
ENSMUSG00000022840	Adcy5	0.000243535	0.0005007	0.145789	0.0151975	0.9644	0.9534	0.645533	0.43029	SFARI					2	0
ENSMUSG00000006651	Aplp1	0.000245551	0.000467702	0.197174	0.0330475	0.556	0.4862	0.649813	0.456603
ENSMUSG00000046364	Rpl27a	0.000252908	0.000305151	0.11308	0.0162725	0.183	0.1144	0.946037	0.120665
ENSMUSG00000101609	Kcnq1ot1	0.000256406	0.000481607	-0.151673	0.0254209	0.3982	0.508	0.659454	0.476851
ENSMUSG00000033007	Asic4	0.00026956	0.000331686	0.110157	0.010108	0.2218	0.1452	0.833063	0.373282
ENSMUSG00000072235	Tuba1a	0.000274701	0.000559111	0.151695	0.0261373	0.265	0.1748	0.628419	0.511191
ENSMUSG00000024500	Ppp2r2b	0.000278133	0.000305133	-0.152437	0.0138243	0.862	0.9124	1	0
ENSMUSG00000100826	Snhg14	0.000287107	0.000477234	0.125247	0.0216507	0.9872	0.9944	0.811019	0.422574
ENSMUSG00000117521	Gm50024	0.000291388	0.000258135	-0.126611	0.0207657	0.2508	0.3448	0.730343	0.428492
ENSMUSG00000058589	Anks1b	0.000307317	0.000398935	-0.117411	0.0186795	1	1	0.661679	0.463298	SFARI					2	1
ENSMUSG00000056258	Kcnq3	0.000319528	0.000361282	-0.159505	0.026472	0.9296	0.9452	0.78718	0.416422	SFARI;EAGLE;TADA	0.00084541	Moderate	11.1	Discordant	1	0
ENSMUSG00000032020	Ubash3b	0.000322531	0.000239228	-0.137806	0.0205099	0.1284	0.1984	1	0
ENSMUSG00000025393	Atp5b	0.000337957	0.000709146	0.207488	0.035812	0.4678	0.3836	0.4561	0.499485
ENSMUSG00000038418	Egr1	0.000339361	0.000534876	0.141254	0.0339189	0.2388	0.1538	0.602982	0.543639
ENSMUSG00000060636	Rpl35a	0.00038031	0.000451232	0.133474	0.0211745	0.2078	0.1352	0.755738	0.423041
ENSMUSG00000022884	Eif4a2	0.000385934	0.000430793	0.158481	0.0155673	0.4036	0.3222	0.88382	0.259787
ENSMUSG00000030621	Me3	0.000400271	0.000475596	-0.185008	0.0266332	0.6892	0.7526	0.679678	0.459028
ENSMUSG00000055214	Pld5	0.000406964	0.000527793	-0.173794	0.0334493	0.3966	0.496	0.844433	0.22727
ENSMUSG00000016933	Plcg1	0.000413363	0.000409394	0.121227	0.0146186	0.2552	0.1782	0.981311	0.041789
ENSMUSG00000026610	Esrrg	0.000434973	0.000935411	-0.18472	0.0250628	0.4972	0.6036	0.46183	0.492999
ENSMUSG00000031818	Cox4i1	0.000438766	0.00068508	0.179896	0.0172394	0.3336	0.2478	0.631985	0.505899
ENSMUSG00000021936	Mapk8	0.000450967	0.000782456	-0.116218	0.0243158	0.3168	0.4198	0.719249	0.431926
ENSMUSG00000003273	Car11	0.000452622	0.000522389	0.145824	0.0150296	0.552	0.4692	1	0
ENSMUSG00000097466	D430036J16Rik	0.000463647	0.000327913	-0.116587	0.0149715	0.1964	0.2738	1	0
ENSMUSG00000030067	Foxp1	0.000504064	0.000654269	-0.132177	0.0196511	0.9754	0.9808	0.904015	0.21463	SFARI;EAGLE;TADA	0	Definitive	60.45	Concordant	1	1
ENSMUSG00000027933	Ints3	0.000516243	0.000360485	0.106218	0.0108407	0.229	0.157	1	0
ENSMUSG00000021686	Ap3b1	0.000540513	0.000758888	-0.108312	0.0101389	0.3572	0.4562	1	0
ENSMUSG00000051177	Plcb1	0.000540603	0.00116674	-0.147297	0.0299345	0.9988	0.9964	0.523333	0.450949	SFARI					2	0
ENSMUSG00000042348	Arl15	0.000564137	0.00105896	-0.15659	0.03006	0.8064	0.8678	0.63963	0.495387
ENSMUSG00000005871	Apc	0.000579275	0.000291628	-0.129301	0.005113	0.6096	0.677	1	0
ENSMUSG00000056427	Slit3	0.000621061	0.000504014	-0.124245	0.0165273	0.9226	0.9562	0.92009	0.178684
ENSMUSG00000004267	Eno2	0.000623856	0.00127263	0.174171	0.0238377	0.451	0.3634	0.752538	0.407443
ENSMUSG00000015143	Actn1	0.00063457	0.000760511	0.175878	0.0175273	0.7042	0.646	0.947814	0.116692
ENSMUSG00000037996	Slc24a2	0.000665836	0.000488979	-0.15621	0.0151679	0.8494	0.8948	1	0	SFARI					2	0
ENSMUSG00000013236	Ptprs	0.00066847	0.00121784	0.169071	0.0215492	0.5506	0.4634	0.655897	0.473478
ENSMUSG00000022199	Slc22a17	0.000694829	0.00154954	0.234411	0.0460095	0.6324	0.5332	0.244962	0.433083
ENSMUSG00000046516	Cox17	0.00070917	0.000690771	0.0768783	0.0100563	0.1126	0.0606	0.910583	0.199942
ENSMUSG00000068696	Gpr88	0.000726761	0.00148425	0.205461	0.0374287	0.5074	0.4284	0.627698	0.430656
ENSMUSG00000042750	Bex2	0.000737571	0.00162296	0.133181	0.0196824	0.2298	0.145	0.485338	0.444676
ENSMUSG00000023826	Prkn	0.000757178	0.000650442	-0.135327	0.0179069	0.8002	0.8552	1	0	SFARI					2	0
ENSMUSG00000018171	Vmp1	0.000767228	0.00100498	-0.146913	0.0312754	0.4402	0.5324	0.968734	0.0699131
ENSMUSG00000028137	Celf3	0.00077236	0.000998037	0.119604	0.0179466	0.3626	0.2776	0.926832	0.163609
ENSMUSG00000024548	Setbp1	0.000774571	0.00167818	-0.17338	0.0293339	0.4902	0.5956	0.414197	0.534792	SFARI					1	0
ENSMUSG00000006576	Slc4a3	0.000865065	0.00082118	0.162811	0.0172316	0.4604	0.3902	0.993734	0.0140109
ENSMUSG00000026740	Dnajc1	0.000895808	0.00117148	-0.172946	0.0358417	0.657	0.7416	0.623014	0.517548
ENSMUSG00000027419	Pcsk2	0.000917995	0.00122166	0.128761	0.0218789	0.9906	0.9882	0.842132	0.353004
ENSMUSG00000040820	Hlcs	0.000920546	0.00111208	-0.112617	0.022479	0.2502	0.3388	0.974319	0.0574251
ENSMUSG00000029823	Luc7l2	0.000927289	0.00151776	-0.122873	0.0322976	0.8918	0.9342	0.80777	0.42984
ENSMUSG00000040640	Erc2	0.0009367	0.00161816	-0.105937	0.0141976	0.997	0.999	1	0
ENSMUSG00000019146	Cacng2	0.000951265	0.00139153	-0.109037	0.0129431	0.2412	0.3222	1	0
ENSMUSG00000028578	Caap1	0.000966812	0.00166153	-0.131766	0.0272806	0.2038	0.2856	0.802751	0.441061
ENSMUSG00000061762	Tac1	0.000997615	0.00137974	0.261613	0.0422333	0.6924	0.6344	0.77177	0.411646
ENSMUSG00000026223	Itm2c	0.00101447	0.00184216	0.183988	0.02135	0.535	0.4764	0.860962	0.310899
ENSMUSG00000098274	Rpl24	0.00101483	0.00100813	0.0907521	0.00550967	0.143	0.0884	1	0
ENSMUSG00000029108	Pcdh7	0.00101602	0.00111265	-0.210596	0.0490174	0.7114	0.7578	1	0
ENSMUSG00000022269	Marchf11	0.00102997	0.00207663	-0.124796	0.0179629	0.215	0.3042	0.816986	0.393232
ENSMUSG00000028274	Rngtt	0.00107745	0.00154682	-0.110614	0.0186974	0.3922	0.49	0.813992	0.415926
ENSMUSG00000068923	Syt11	0.00110332	0.000897988	0.159735	0.00857412	0.5516	0.4864	1	0
ENSMUSG00000046330	Rpl37a	0.00116678	0.000992565	0.0979647	0.010972	0.2032	0.1394	1	0
ENSMUSG00000096929	A330023F24Rik	0.00119657	0.00108672	0.153406	0.0282034	0.772	0.7426	0.945486	0.121896
ENSMUSG00000032174	Icam5	0.00122512	0.00232696	0.149334	0.0146202	0.4662	0.3932	0.91208	0.196594
ENSMUSG00000060510	Zfp266	0.00122859	0.00198076	-0.0981478	0.0248221	0.187	0.2722	0.800163	0.446849
ENSMUSG00000005705	Agrp	0.00123512	0.00185859	0.143406	0.0369262	0.2716	0.1904	0.748215	0.43204
ENSMUSG00000061718	Ppp1r1b	0.00123568	0.00114962	0.144839	0.017044	0.5492	0.4822	1	0	SFARI					2	0
ENSMUSG00000002102	Psmc3	0.001239	0.000921103	0.0871953	0.0131148	0.1696	0.1086	0.904251	0.214101
ENSMUSG00000041697	Cox6a1	0.00131799	0.00270659	0.195876	0.0346224	0.3434	0.2594	0.468131	0.487188
ENSMUSG00000033569	Adgrb3	0.00133053	0.00225582	0.101896	0.018903	1	1	0.670066	0.461406
ENSMUSG00000031618	Nr3c2	0.00136578	0.00147627	-0.15831	0.00726728	0.5498	0.6358	1	0	SFARI					1	1
ENSMUSG00000026657	Frmd4a	0.0013838	0.00148975	-0.167459	0.0366171	0.722	0.785	0.911356	0.198213
ENSMUSG00000044950	Pwwp2a	0.00143493	0.00137107	-0.095178	0.0140681	0.2716	0.3566	1	0
ENSMUSG00000025279	Dnase1l3	0.00150701	0.00274282	0.232748	0.0237938	0.2592	0.1878	0.883271	0.244987
ENSMUSG00000044340	Phlpp1	0.00151062	0.00174155	-0.167767	0.0248249	0.4116	0.4902	0.969475	0.0682559
ENSMUSG00000028519	Dab1	0.00154686	0.00135674	-0.112956	0.0201556	0.98	0.98	0.916021	0.187783
ENSMUSG00000027350	Chgb	0.00157956	0.00107855	0.109624	0.00669998	0.2822	0.2106	1	0
ENSMUSG00000025372	Baiap2	0.00160875	0.00175546	0.154662	0.0300483	0.8524	0.8134	0.943943	0.125348
ENSMUSG00000049422	Chchd10	0.00162547	0.00315853	0.143258	0.0281602	0.3094	0.2258	0.814287	0.256007
ENSMUSG00000049878	Rlf	0.0016511	0.00111374	-0.108211	0.0119356	0.2654	0.3398	1	0
ENSMUSG00000054885	4930578G10Rik	0.00167128	0.00154447	-0.112366	0.0182955	0.2732	0.3544	1	0
ENSMUSG00000020121	Srgap1	0.00169953	0.00216672	-0.174117	0.020614	0.6736	0.7326	0.871707	0.286871
ENSMUSG00000021911	Parg	0.0017147	0.00181832	-0.112138	0.024359	0.2994	0.3868	0.804299	0.4376
ENSMUSG00000000804	Usp32	0.00177442	0.00181367	-0.109593	0.0180426	0.5798	0.6622	1	0
ENSMUSG00000023150	Ivns1abp	0.00179169	0.00318673	0.164554	0.0221246	0.72	0.6786	1	0
ENSMUSG00000033900	Map9	0.0017934	0.00185408	-0.0964564	0.0134498	0.1244	0.1862	0.962789	0.0832068
ENSMUSG00000003346	Abhd17a	0.00179656	0.00265008	0.104189	0.0204695	0.183	0.1186	0.81938	0.403878
ENSMUSG00000055839	Elob	0.00181085	0.00172392	0.130478	0.0212743	0.2316	0.1656	0.830158	0.379778
ENSMUSG00000079055	Slc8a3	0.00183806	0.00374361	-0.1445	0.0237151	0.4306	0.5226	1	0
ENSMUSG00000042148	Cox10	0.00185961	0.00246434	-0.0801772	0.0194281	0.0936	0.1544	0.798411	0.2825
ENSMUSG00000035569	Ankrd11	0.00190836	0.0018049	-0.119195	0.0133201	0.6742	0.7374	1	0	SFARI;EAGLE;TADA	1.58e-05	Definitive	22.6	Concordant	1	1
ENSMUSG00000048410	Zfp407	0.00192378	0.00221891	-0.116539	0.0191398	0.5368	0.6214	1	0
ENSMUSG00000006057	Atp5g1	0.00199164	0.00180001	0.118292	0.00666606	0.2516	0.1874	1	0
ENSMUSG00000041216	Clvs1	0.00203405	0.00377601	-0.14013	0.0216592	0.6872	0.752	0.94956	0.112787
ENSMUSG00000062044	Lmtk3	0.00205988	0.00258706	0.123589	0.0173298	0.3846	0.3098	1	0	SFARI					3	0
ENSMUSG00000034135	Sik3	0.00207613	0.00259994	-0.187523	0.029264	0.7956	0.8382	1	0
ENSMUSG00000025571	Tnrc6c	0.00207874	0.0014128	-0.12786	0.0236705	0.7366	0.7954	1	0	SFARI					2	0
ENSMUSG00000028676	Srsf10	0.00208297	0.00291612	-0.10251	0.0225658	0.258	0.3422	1	0
ENSMUSG00000024736	Tmem132a	0.00210479	0.00458885	0.146267	0.0269361	0.2482	0.1718	0.818531	0.405778
ENSMUSG00000016477	E2f3	0.00211643	0.000558658	-0.0960735	0.00730623	0.1484	0.2088	1	0
ENSMUSG00000033577	Myo6	0.0021826	0.00382755	-0.0681381	0.0146165	0.07	0.123	0.951341	0.108804
ENSMUSG00000029632	Ndufa4	0.00218921	0.00179796	0.144949	0.0237771	0.2712	0.21	1	0
ENSMUSG00000002997	Prkar2b	0.00219889	0.00268464	-0.128244	0.0250892	0.5278	0.6222	1	0
ENSMUSG00000021098	4930447C04Rik	0.0022692	0.00300312	-0.106169	0.020149	0.1206	0.1848	0.930977	0.15434
ENSMUSG00000035964	Tmem59l	0.00241195	0.00150888	0.092917	0.00565935	0.2022	0.142	1	0
ENSMUSG00000021182	Ccdc88c	0.00241361	0.00240083	-0.124913	0.0113295	0.579	0.6554	1	0	SFARI					2	0
ENSMUSG00000025508	Rplp2	0.00251855	0.00481973	0.116788	0.0138865	0.2066	0.1424	1	0
ENSMUSG00000079641	Rpl39	0.00257431	0.00162899	0.0698145	0.00653678	0.131	0.0818	1	0
ENSMUSG00000004933	Matk	0.00259135	0.00439295	0.142842	0.0239103	0.4822	0.4142	1	0
ENSMUSG00000058318	Phf21a	0.00261183	0.00480707	-0.14961	0.0266062	0.717	0.7658	0.965852	0.0763574	SFARI;EAGLE;TADA	0.00022532	Limited	5.35	Discordant	1	1
ENSMUSG00000019806	Aig1	0.00261338	0.00394351	-0.107335	0.0110103	0.3868	0.4748	1	0
ENSMUSG00000039478	Micu3	0.00266643	0.00247444	-0.119634	0.0203964	0.4052	0.4832	1	0
ENSMUSG00000074024	4632427E13Rik	0.00276938	0.00215289	-0.124729	0.0155639	0.3158	0.3864	1	0
ENSMUSG00000013997	Nit1	0.00283154	0.00503115	0.112462	0.022182	0.2402	0.1682	0.981573	0.0412035
ENSMUSG00000022770	Dlg1	0.00284336	0.00217513	-0.124579	0.0108537	0.8072	0.8656	1	0	SFARI					2	0
ENSMUSG00000026836	Acvr1	0.00287549	0.00420651	-0.101084	0.0155372	0.3488	0.43	1	0
ENSMUSG00000001175	Calm1	0.00288682	0.00617842	0.17778	0.0351028	0.659	0.6116	0.933244	0.149272
ENSMUSG00000025225	Nfkb2	0.00289798	0.00497352	0.0927685	0.0178484	0.1758	0.114	0.919279	0.180497
ENSMUSG00000029223	Uchl1	0.00291796	0.005931	0.154352	0.0185208	0.3754	0.2988	0.946467	0.119704
ENSMUSG00000059213	Ddn	0.0029771	0.00375267	0.0720364	0.00555016	0.127	0.079	1	0
ENSMUSG00000052139	Babam2	0.00298885	0.00357779	-0.117853	0.0264848	0.3638	0.4496	0.939771	0.134676
ENSMUSG00000024211	Grm8	0.00299532	0.00222399	-0.219872	0.0199665	0.3358	0.4066	1	0
ENSMUSG00000040785	Ttc3	0.00308838	0.00291686	0.107037	0.0169553	0.958	0.944	1	0
ENSMUSG00000024661	Fth1	0.00309135	0.00679684	0.164712	0.0369661	0.4156	0.3282	0.662072	0.384391
ENSMUSG00000021318	Gli3	0.0031121	0.00392236	-0.169406	0.0261929	0.2854	0.3604	1	0
ENSMUSG00000069727	Zfp975	0.00315403	0.00246111	-0.0635912	0.00829995	0.0946	0.146	1	0
ENSMUSG00000038127	Ccdc50	0.00317272	0.00345582	-0.0768595	0.0137024	0.104	0.1592	1	0
ENSMUSG00000031290	Lrch2	0.00319698	0.00220295	-0.0907762	0.0113689	0.2896	0.3654	1	0
ENSMUSG00000021709	Erbin	0.00325917	0.00702028	-0.154106	0.0436819	0.371	0.4688	0.622176	0.517556	SFARI					2	0
ENSMUSG00000020003	Pex7	0.00329287	0.00403164	-0.104448	0.0147418	0.2242	0.294	1	0	SFARI					2	0
ENSMUSG00000037533	Rapgef6	0.00330072	0.00627241	-0.12849	0.0234522	0.7586	0.8086	1	0
ENSMUSG00000050711	Scg2	0.0033032	0.00329278	0.13036	0.00901557	0.2892	0.2258	1	0
ENSMUSG00000020189	Osbpl8	0.00334213	0.00674043	-0.138017	0.0380836	0.9258	0.959	0.836182	0.366309
ENSMUSG00000035674	Ndufa3	0.00335581	0.00441054	0.0959958	0.0177202	0.1614	0.1034	0.989125	0.0243166
ENSMUSG00000038187	Btbd10	0.00338599	0.00471356	-0.0902935	0.0154229	0.3416	0.4276	1	0
ENSMUSG00000010517	Faf1	0.00344519	0.00456352	-0.131357	0.0261354	0.7112	0.7966	0.938287	0.137994
ENSMUSG00000046432	Bex3	0.00361918	0.00415803	0.0926579	0.0233377	0.1844	0.1246	1	0
ENSMUSG00000035530	Eif1	0.00364645	0.00697995	0.130524	0.0180947	0.4238	0.3522	1	0
ENSMUSG00000037857	Nufip2	0.00365427	0.0049796	-0.103615	0.0162472	0.2698	0.343	1	0
ENSMUSG00000003380	Rabac1	0.00368367	0.00730871	0.1231	0.0183215	0.2806	0.2098	1	0
ENSMUSG00000038244	Mical2	0.00370712	0.00283508	-0.0820285	0.0137911	0.1502	0.209	1	0
ENSMUSG00000004961	Syt5	0.00371201	0.00447466	0.122936	0.0199596	0.278	0.2094	0.891152	0.243392
ENSMUSG00000043289	Mei4	0.00377825	0.0039966	-0.14597	0.0373924	0.545	0.6256	0.924747	0.16827
ENSMUSG00000033917	Gde1	0.00381193	0.00259559	0.116338	0.0130586	0.2778	0.2178	1	0
ENSMUSG00000045098	Kmt5b	0.00381376	0.00301808	-0.104744	0.010393	0.265	0.3318	1	0	SFARI;EAGLE;TADA	0	Definitive	14.05	Concordant	1	0
ENSMUSG00000007783	Cpt1c	0.00384731	0.00434097	0.138778	0.0179373	0.6182	0.5654	1	0
ENSMUSG00000026058	Khdrbs2	0.00387163	0.00336984	0.191197	0.0309626	0.3966	0.3286	1	0	SFARI					2	0
ENSMUSG00000030086	Chchd6	0.00399922	0.00764057	-0.0891601	0.0174213	0.1738	0.2432	1	0
ENSMUSG00000113216	Gm40841	0.00400522	0.0035904	-0.0947202	0.0191821	0.2104	0.2778	1	0
ENSMUSG00000017485	Top2b	0.00409811	0.00774605	-0.109746	0.0245508	0.4582	0.5456	1	0	SFARI					2	0
ENSMUSG00000061032	Rrp1	0.00410525	0.00556609	0.102392	0.0148567	0.1874	0.1296	1	0
ENSMUSG00000030306	Tmtc1	0.00413175	0.00415084	-0.143463	0.0376476	0.5786	0.641	1	0
ENSMUSG00000045302	Preb	0.00418231	0.00556732	-0.0781896	0.0210747	0.1916	0.268	1	0
ENSMUSG00000026596	Abl2	0.00421611	0.00418928	-0.104126	0.0280662	0.4494	0.531	1	0	SFARI					3	0
ENSMUSG00000016427	Ndufa1	0.00427	0.00814307	0.105994	0.0201229	0.1636	0.106	1	0
ENSMUSG00000000088	Cox5a	0.00428317	0.00526564	0.14967	0.0281065	0.3052	0.236	0.809902	0.425072
ENSMUSG00000090223	Pcp4	0.00428467	0.00952622	0.257684	0.0358706	0.574	0.5048	0.473941	0.489868
ENSMUSG00000034551	Hdx	0.00428529	0.00422393	-0.0823697	0.0113114	0.2278	0.2992	1	0
ENSMUSG00000012422	Tmem167	0.00430438	0.00764372	-0.0954166	0.0152063	0.194	0.2616	1	0
ENSMUSG00000020594	Pum2	0.00430576	0.0061573	-0.104851	0.00938579	0.3962	0.4752	1	0
ENSMUSG00000038181	Chpf2	0.00435554	0.00413275	0.100546	0.0141927	0.2138	0.1552	1	0
ENSMUSG00000033282	Rpgrip1l	0.00438649	0.00369925	-0.0747042	0.011805	0.1744	0.238	1	0
ENSMUSG00000023175	Bsg	0.00441026	0.00310743	0.120564	0.00870596	0.2656	0.2088	1	0
ENSMUSG00000056201	Cfl1	0.00444064	0.00338823	0.101646	0.0124008	0.1922	0.1366	1	0
ENSMUSG00000002107	Celf2	0.00447571	0.00440525	-0.0535986	0.01647	1	1	0.882851	0.261952	SFARI					2	1
ENSMUSG00000034818	Celf5	0.00458819	0.00662358	0.125876	0.0220486	0.5746	0.5038	1	0
ENSMUSG00000058317	Ube2e2	0.0046059	0.00764398	-0.130319	0.0248861	0.7558	0.8094	0.993183	0.0152438
ENSMUSG00000039059	Hrh3	0.00463998	0.00553561	0.105383	0.0125562	0.177	0.1218	1	0
ENSMUSG00000038578	Susd1	0.00465816	0.00397772	-0.10093	0.0138293	0.2298	0.2946	1	0
ENSMUSG00000062380	Tubb3	0.00466084	0.00788535	-0.0845973	0.0185818	0.181	0.2518	1	0
ENSMUSG00000105265	Sox2ot	0.00468418	0.00329182	-0.181374	0.0167283	0.1594	0.2142	1	0
ENSMUSG00000039278	Pcsk1n	0.00469177	0.00571648	0.180493	0.0161642	0.5442	0.49	1	0
ENSMUSG00000026455	Klhl12	0.00470464	0.00644538	-0.0915384	0.0219489	0.1136	0.1754	0.793582	0.287982
ENSMUSG00000034730	Adgrb1	0.00475623	0.00785643	0.163359	0.0235073	0.6006	0.5524	1	0
ENSMUSG00000029432	Nipsnap2	0.00480672	0.00495909	-0.0935442	0.0129834	0.2336	0.3006	1	0
ENSMUSG00000028833	Ncdn	0.00481035	0.00938758	0.163741	0.0363326	0.3312	0.2538	0.677152	0.457625
ENSMUSG00000027581	Stmn3	0.00483398	0.00783005	0.120591	0.0123871	0.2674	0.2032	1	0
ENSMUSG00000040351	Ankib1	0.00484636	0.00935512	-0.125275	0.0394079	0.3358	0.4258	0.830829	0.378277
ENSMUSG00000057914	Cacnb2	0.00484711	0.00439238	-0.128389	0.0263362	0.9808	0.9898	1	0	SFARI					2	0
ENSMUSG00000029815	Malsu1	0.00488154	0.00296167	-0.0578167	0.00818197	0.09	0.138	1	0
ENSMUSG00000031729	Ist1	0.00488686	0.00246111	0.0959674	0.0122785	0.2442	0.1858	1	0
ENSMUSG00000040003	Magi2	0.00490253	0.00342845	-0.107401	0.0127817	0.9884	0.9972	1	0
ENSMUSG00000025468	Caly	0.00494526	0.00725007	0.129226	0.0111416	0.3684	0.2992	1	0
ENSMUSG00000061603	Akap6	0.0049471	0.00620062	-0.0966816	0.019862	0.9268	0.9546	1	0
ENSMUSG00000059401	Mamld1	0.00501211	0.00477625	-0.0770925	0.0181325	0.202	0.2714	1	0
ENSMUSG00000022707	Gbe1	0.00512569	0.0103459	-0.112799	0.0293096	0.141	0.208	1	0	SFARI					2	0
ENSMUSG00000097536	2610037D02Rik	0.0051368	0.00430097	-0.0874549	0.0107661	0.1544	0.2122	1	0
ENSMUSG00000008348	Ubc	0.00514185	0.0080023	0.114572	0.0191461	0.2594	0.192	1	0
ENSMUSG00000010086	Rnf112	0.00517708	0.005941	0.14519	0.0213272	0.5858	0.5416	1	0
ENSMUSG00000039652	Cpeb3	0.00518382	0.00682065	-0.0766775	0.0395368	0.5794	0.6856	1	0
ENSMUSG00000015476	Prrt1	0.00522763	0.00575197	0.116218	0.0255261	0.3592	0.282	0.875008	0.171154
ENSMUSG00000032294	Pkm	0.00523317	0.00585154	0.133653	0.0221317	0.3672	0.3004	1	0
ENSMUSG00000024462	Gabbr1	0.00524195	0.00542539	0.124682	0.0141815	0.6264	0.5642	1	0
ENSMUSG00000045776	Lrtm1	0.00527798	0.0082066	-0.11006	0.0260745	0.407	0.4978	0.845252	0.346027
ENSMUSG00000037703	Lzts3	0.00527975	0.00681828	0.135352	0.0152415	0.4562	0.3902	1	0
ENSMUSG00000087402	Gm11867	0.00532607	0.0116516	0.127723	0.0290683	0.323	0.2412	0.689394	0.432518
ENSMUSG00000033697	Arhgap39	0.00540353	0.00978343	-0.0933213	0.0166076	0.2244	0.298	1	0
ENSMUSG00000003534	Ddr1	0.00540949	0.00394441	-0.0567072	0.0079139	0.068	0.1104	1	0
ENSMUSG00000035189	Ano4	0.00544045	0.00698813	-0.109944	0.0293214	0.125	0.1796	1	0
ENSMUSG00000028261	Ndufaf4	0.00544683	0.00775169	-0.103178	0.0159283	0.282	0.355	1	0
ENSMUSG00000041936	Agrn	0.00558923	0.00639933	0.137474	0.0226354	0.358	0.2912	1	0
ENSMUSG00000052446	Zfp961	0.00562185	0.00693347	-0.0664958	0.0127123	0.092	0.1426	1	0
ENSMUSG00000021188	Trip11	0.00567314	0.00548425	-0.0928161	0.022017	0.2354	0.3026	1	0
ENSMUSG00000071341	Egr4	0.00568293	0.0112649	0.107274	0.0223864	0.1136	0.0664	1	0
ENSMUSG00000032959	Pebp1	0.0057242	0.00493103	0.0926355	0.0195336	0.208	0.1504	1	0
ENSMUSG00000024515	Smad4	0.00578953	0.00354386	-0.0895606	0.00617125	0.3972	0.4782	1	0	SFARI					2	0
ENSMUSG00000027763	Mbnl1	0.00586631	0.00474204	-0.112389	0.0253524	0.7358	0.7794	1	0
ENSMUSG00000039220	Ppp1r10	0.005906	0.00767261	-0.0978462	0.0258407	0.1826	0.2506	0.813492	0.417046
ENSMUSG00000052516	Robo2	0.00595107	0.00646828	-0.103536	0.0144512	0.9822	0.9878	1	0	SFARI					2	0
ENSMUSG00000041841	Rpl37	0.00597185	0.00725655	0.0999845	0.0196811	0.216	0.1546	1	0
ENSMUSG00000034685	Fam171a2	0.00598088	0.0108291	0.0795258	0.0173247	0.1568	0.1	0.947353	0.117722
ENSMUSG00000047215	Rpl9	0.00598149	0.00561566	0.0966768	0.0116071	0.2074	0.1526	1	0
ENSMUSG00000037999	Arap2	0.00598782	0.00363698	-0.0889526	0.0118757	0.2612	0.3288	1	0
ENSMUSG00000029775	Klhdc10	0.00606734	0.00570938	-0.0916226	0.00907297	0.3422	0.413	1	0
ENSMUSG00000039156	Stim2	0.00607302	0.00680557	-0.0919794	0.0113126	0.308	0.3764	1	0
ENSMUSG00000067925	Rtl8a	0.00610498	0.00410426	0.0788078	0.0125464	0.1782	0.1254	1	0
ENSMUSG00000044471	Lncpint	0.00613979	0.00514205	-0.091372	0.0112165	0.9338	0.9522	1	0
ENSMUSG00000017969	Ptgis	0.0061446	0.0111683	0.102098	0.0290189	0.2258	0.1578	0.835508	0.367815
ENSMUSG00000011960	Ccnt1	0.00617085	0.00663873	-0.069729	0.0110974	0.2026	0.2702	1	0
ENSMUSG00000057329	Bcl2	0.00620459	0.00677203	-0.166859	0.038557	0.355	0.428	0.81593	0.411593
ENSMUSG00000039000	Ube3c	0.00620813	0.00465835	-0.107919	0.00462364	0.4544	0.5278	1	0	SFARI					2	0
ENSMUSG00000039954	Stk32a	0.00628131	0.00726799	-0.127697	0.0119403	0.51	0.576	1	0
ENSMUSG00000010721	Lmbr1	0.00643049	0.00947448	-0.136469	0.0257713	0.2504	0.3202	1	0
ENSMUSG00000062647	Rpl7a	0.0064581	0.00810329	0.0870691	0.0112913	0.1436	0.0958	1	0
ENSMUSG00000035067	Xkr6	0.00647857	0.00804287	-0.109843	0.0135145	0.8312	0.8766	1	0
ENSMUSG00000062991	Nrg1	0.00661945	0.00587167	-0.0871571	0.0143216	1	0.9996	0.924508	0.168806
ENSMUSG00000037428	Vgf	0.00666607	0.00648966	0.101897	0.0211052	0.2388	0.1786	1	0
ENSMUSG00000031605	Klhl2	0.00679724	0.00581503	-0.125374	0.0131838	0.607	0.6654	1	0
ENSMUSG00000030643	Rab30	0.00683392	0.0071518	-0.100739	0.0183419	0.4132	0.4814	1	0
ENSMUSG00000053580	Tanc2	0.00691196	0.00571449	-0.0934316	0.0101677	0.9528	0.9652	1	0	SFARI;EAGLE;TADA	0.00200495	Definitive	24.95	Concordant	1	1
ENSMUSG00000031841	Cdh13	0.00702319	0.009373	-0.168645	0.033842	0.5594	0.6316	1	0	SFARI					2	0
ENSMUSG00000020163	Uqcr11	0.00703946	0.012792	0.0877237	0.0180582	0.1578	0.1006	0.830018	0.380092
ENSMUSG00000041607	Mbp	0.00708011	0.00770724	-0.1497	0.0315634	0.1718	0.2308	1	0
ENSMUSG00000115718	Gm49179	0.00714489	0.00441684	0.0867949	0.00591949	0.1576	0.1104	1	0
ENSMUSG00000042359	Osbpl6	0.00728223	0.0080467	-0.101696	0.0126119	0.4256	0.5054	1	0
ENSMUSG00000054843	Atrnl1	0.00728747	0.00924862	-0.11939	0.0310786	0.7682	0.8294	1	0
ENSMUSG00000034488	Edil3	0.00735389	0.0123449	-0.202118	0.0285114	0.3258	0.3952	1	0
ENSMUSG00000006676	Usp19	0.00737329	0.00312343	0.109743	0.00791164	0.289	0.234	1	0
ENSMUSG00000043991	Pura	0.00747354	0.00898429	-0.0998353	0.0212034	0.2854	0.356	1	0
ENSMUSG00000035521	Gnptg	0.00749034	0.00817655	0.122372	0.0236973	0.374	0.311	1	0
ENSMUSG00000048076	Arf1	0.00758494	0.0111047	0.0956652	0.0136255	0.2182	0.1596	1	0
ENSMUSG00000020173	Cobl	0.00758671	0.0101737	-0.130138	0.0329263	0.543	0.6156	0.966379	0.0751792
ENSMUSG00000038495	Otud7b	0.00759416	0.00654952	-0.0581708	0.0138636	0.1238	0.1774	1	0
ENSMUSG00000059586	Nsmce2	0.00762117	0.0126503	-0.0832775	0.0189033	0.3978	0.4762	1	0
ENSMUSG00000024966	Stip1	0.00769917	0.0126266	0.0885892	0.0205814	0.1614	0.1082	1	0
ENSMUSG00000020220	Vps13d	0.00784363	0.00832309	-0.0863368	0.0177902	0.2914	0.3674	1	0
ENSMUSG00000058761	Rnf169	0.007873	0.0129301	-0.0889227	0.0232448	0.3482	0.4362	1	0
ENSMUSG00000055932	Fto	0.00811224	0.00473728	-0.105645	0.0225855	0.5244	0.5852	1	0
ENSMUSG00000045201	Lrrc3b	0.00811278	0.00886525	-0.0966808	0.0214841	0.2136	0.2754	1	0
ENSMUSG00000014850	Msh3	0.0081951	0.0128847	-0.0896283	0.0227155	0.206	0.2756	1	0
ENSMUSG00000036339	Tmem260	0.00837441	0.00639645	-0.0803574	0.0133194	0.1954	0.2548	1	0
ENSMUSG00000018707	Dync1h1	0.0083749	0.0116953	0.128918	0.0227645	0.3898	0.3306	1	0	SFARI;EAGLE;TADA	3.36e-05	Definitive	13.45	Concordant	1	0
ENSMUSG00000045967	Gpr158	0.00851101	0.00703342	-0.113334	0.00905667	0.9658	0.9804	1	0
ENSMUSG00000024325	Ring1	0.00854644	0.0161422	0.0879034	0.0249381	0.2306	0.165	1	0
ENSMUSG00000020704	Asic2	0.00861836	0.0132802	-0.12479	0.0422102	0.7024	0.747	1	0
ENSMUSG00000020375	Rufy1	0.00865216	0.00652139	-0.0748168	0.0175452	0.1094	0.1596	1	0
ENSMUSG00000034687	Fras1	0.00868797	0.00873505	-0.108328	0.017534	0.6394	0.7186	1	0
ENSMUSG00000037196	Pacrg	0.00879621	0.013379	-0.108076	0.028113	0.1284	0.186	0.848462	0.338849
ENSMUSG00000039372	Marchf4	0.00882265	0.0141487	-0.0970398	0.0255574	0.2632	0.337	1	0
ENSMUSG00000005533	Igf1r	0.00883893	0.0172319	-0.113325	0.0271063	0.4178	0.4956	1	0
ENSMUSG00000030126	Tmcc1	0.00884024	0.00820026	-0.109717	0.0237395	0.7178	0.778	1	0
ENSMUSG00000040265	Dnm3	0.00912403	0.00609988	-0.103046	0.0178543	0.688	0.7526	1	0
ENSMUSG00000025422	Agap2	0.00913244	0.0105809	0.10548	0.0178983	0.3806	0.312	1	0	SFARI					2	0
ENSMUSG00000031425	Plp1	0.00921509	0.0121022	-0.30572	0.0574969	0.071	0.1106	1	0
ENSMUSG00000058444	Map2k5	0.00931051	0.0168453	-0.0993695	0.0283423	0.3228	0.4066	0.818736	0.40532
ENSMUSG00000027035	Cers6	0.00933036	0.0163769	-0.106213	0.023613	0.41	0.4924	1	0
ENSMUSG00000057897	Camk2b	0.00939776	0.00696832	0.105021	0.0155803	0.8654	0.849	1	0	SFARI						1
ENSMUSG00000000632	Sez6	0.00940937	0.0070836	0.151361	0.00975761	0.5924	0.569	1	0
ENSMUSG00000027282	Mtch2	0.00964368	0.0119242	-0.0749668	0.0177763	0.1986	0.2628	1	0
ENSMUSG00000059602	Syn3	0.00968612	0.0101535	-0.0951681	0.0207056	0.4316	0.507	1	0
ENSMUSG00000027651	Rprd1b	0.00971449	0.0197662	-0.0917667	0.0281306	0.153	0.221	0.809509	0.42595
ENSMUSG00000045441	Gprin3	0.00975189	0.00588388	-0.0799095	0.0168972	0.5378	0.6092	1	0
ENSMUSG00000079509	Zfx	0.00976581	0.00879154	-0.0835881	0.0113174	0.2112	0.2704	1	0
ENSMUSG00000022338	Eny2	0.00976959	0.00908315	-0.0712255	0.0195138	0.1672	0.2288	1	0
ENSMUSG00000026109	Tmeff2	0.00988123	0.00861458	-0.151954	0.0261932	0.6216	0.6764	1	0
ENSMUSG00000024404	Riok3	0.00990214	0.0094551	-0.0786907	0.0183452	0.262	0.3314	1	0
ENSMUSG00000005698	Ctcf	0.0104005	0.00827834	-0.0685341	0.00962024	0.2068	0.2668	1	0	SFARI;EAGLE;TADA	1.33e-07	Moderate	10.45	Discordant	1	1
ENSMUSG00000019894	Slc6a15	0.010454	0.0115554	0.0872594	0.0157951	0.1662	0.1186	1	0
ENSMUSG00000027993	Trim2	0.0104587	0.00877271	-0.0843038	0.0222588	0.6832	0.7536	1	0
ENSMUSG00000071866	Ppia	0.0104839	0.0129951	0.145861	0.0287782	0.3848	0.3278	1	0
ENSMUSG00000017692	Rhbdl3	0.0104977	0.00951656	-0.0848253	0.0106321	0.2058	0.264	1	0
ENSMUSG00000025190	Got1	0.0105036	0.0109076	0.0952729	0.0154282	0.222	0.167	1	0
ENSMUSG00000030020	Prickle2	0.0105259	0.0151574	-0.126041	0.0293619	0.5258	0.604	1	0	SFARI					2	0
ENSMUSG00000025531	Chm	0.0105971	0.01303	-0.0897616	0.022484	0.3962	0.4688	1	0	SFARI					3	0
ENSMUSG00000004383	Large1	0.0106035	0.0156449	-0.112106	0.014541	0.847	0.8984	1	0
ENSMUSG00000031391	L1cam	0.0106123	0.0155252	0.116374	0.0192225	0.2576	0.2018	1	0
ENSMUSG00000035392	Dennd1a	0.0106556	0.0130901	-0.100218	0.0170986	0.8354	0.8738	1	0
ENSMUSG00000040794	C1qtnf4	0.0106811	0.0152489	0.134752	0.0340803	0.5538	0.4978	0.870651	0.289234
ENSMUSG00000030120	Mlf2	0.0108363	0.0210521	0.10912	0.0204502	0.2754	0.2108	1	0
ENSMUSG00000018451	6330403K07Rik	0.0108663	0.0136819	0.0831878	0.00880831	0.1678	0.1194	1	0
ENSMUSG00000027160	Ccdc34	0.0108819	0.0115984	-0.0624038	0.0122115	0.0924	0.1394	1	0
ENSMUSG00000057060	Slc35f3	0.0109193	0.019039	-0.130603	0.034399	0.8238	0.8702	0.883079	0.261443
ENSMUSG00000002028	Kmt2a	0.0109353	0.00673857	0.120565	0.00893645	0.7324	0.713	1	0	SFARI;EAGLE;TADA	0.00142415	Definitive	18.55	Concordant	1	1
ENSMUSG00000002625	Akap8l	0.0109952	0.0159869	0.118826	0.020142	0.7178	0.673	1	0
ENSMUSG00000090733	Rps27	0.0110009	0.0150181	0.0819215	0.0141942	0.2084	0.153	1	0
ENSMUSG00000022000	Zc3h13	0.0110078	0.0148454	-0.0804145	0.0183158	0.3838	0.4638	1	0
ENSMUSG00000031765	Mt1	0.0110849	0.016521	0.0962311	0.0202906	0.1676	0.1162	1	0
ENSMUSG00000036782	Klhl13	0.0112639	0.0150816	-0.12088	0.0164806	0.353	0.415	1	0
ENSMUSG00000090071	Cdk5r2	0.0112719	0.0136002	0.0611877	0.0104283	0.1214	0.0796	1	0
ENSMUSG00000063446	Plppr1	0.0113203	0.0127275	-0.0967529	0.0258703	0.7876	0.8424	1	0
ENSMUSG00000090053	Pakap	0.0113818	0.0183262	-0.0887538	0.0183762	0.1562	0.218	1	0
ENSMUSG00000048758	Rpl29	0.0113987	0.0162939	0.070491	0.0123911	0.1928	0.1386	1	0
ENSMUSG00000058656	Samd12	0.011399	0.0123498	-0.092229	0.0216377	0.863	0.9024	1	0
ENSMUSG00000021720	Rnf180	0.0114642	0.0180483	-0.0907447	0.0237339	0.2356	0.3048	1	0
ENSMUSG00000052698	Tln2	0.0115015	0.0091861	-0.070011	0.0138862	0.5654	0.6572	1	0
ENSMUSG00000031012	Cask	0.01158	0.0116687	-0.116294	0.0193891	0.5246	0.6014	1	0	SFARI					1	0
ENSMUSG00000035299	Mid1	0.011653	0.0097368	0.0561889	0.0089074	0.1076	0.0686	1	0
ENSMUSG00000006711	D130043K22Rik	0.0116744	0.0121691	-0.0867682	0.0217338	0.2158	0.2756	1	0
ENSMUSG00000022789	Dnm1l	0.0117006	0.0136512	-0.102194	0.0138999	0.477	0.5404	1	0
ENSMUSG00000038070	Cntln	0.0117291	0.0132225	-0.0959697	0.0278461	0.2892	0.3578	1	0
ENSMUSG00000004364	Cul3	0.0118567	0.0102569	-0.0811619	0.0213629	0.4146	0.493	1	0	SFARI;EAGLE;TADA	0.00814579	Definitive	18.4	Concordant	1	0
ENSMUSG00000022897	Dyrk1a	0.0120072	0.0146706	-0.0789904	0.0179916	0.4204	0.4946	1	0	SFARI;EAGLE;TADA	1.78e-13	Definitive	20.2	Concordant	1	1
ENSMUSG00000033216	Eefsec	0.0120254	0.019671	-0.0974992	0.0196224	0.2906	0.3592	1	0
ENSMUSG00000051331	Cacna1c	0.0120424	0.0154037	-0.103504	0.0163138	0.9416	0.9628	1	0	SFARI					1	1
ENSMUSG00000019978	Epb41l2	0.012051	0.0117074	-0.071298	0.0143973	0.127	0.1756	1	0
ENSMUSG00000061665	Cd2ap	0.0121271	0.0140702	-0.088801	0.0155453	0.4052	0.4722	1	0
ENSMUSG00000024830	Rps6kb2	0.0121446	0.0221718	0.107816	0.01538	0.3334	0.2666	1	0
ENSMUSG00000041650	Pcca	0.0121491	0.0206778	-0.120146	0.0282016	0.3652	0.4368	1	0	SFARI						1
ENSMUSG00000029126	Nsg1	0.012269	0.0239065	0.151215	0.022028	0.3702	0.3086	1	0
ENSMUSG00000079037	Prnp	0.0123119	0.0242132	0.0969701	0.019078	0.187	0.1324	1	0
ENSMUSG00000063873	Slc24a3	0.0123499	0.0245772	-0.122604	0.0257689	0.2504	0.322	0.90979	0.201716
ENSMUSG00000022378	Cyrib	0.0124423	0.0257064	-0.130364	0.0420798	0.639	0.7214	0.843142	0.350745
ENSMUSG00000046201	Scaf8	0.0124819	0.019786	-0.099655	0.0291765	0.4844	0.5528	1	0
ENSMUSG00000005682	Pan2	0.012544	0.0176086	0.0594092	0.0111311	0.122	0.0792	1	0
ENSMUSG00000016346	Kcnq2	0.0127105	0.0135916	0.106263	0.0194409	0.5066	0.45	1	0	SFARI					2	0
ENSMUSG00000019947	Arid5b	0.0127387	0.0143003	-0.103771	0.0198221	0.1804	0.2354	1	0
ENSMUSG00000027281	Slx4ip	0.01274	0.0109523	-0.0703949	0.0117501	0.2376	0.2992	1	0
ENSMUSG00000027674	Pex5l	0.0128605	0.0252338	-0.146235	0.0341906	0.2506	0.3138	0.938481	0.13756
ENSMUSG00000049517	Rps23	0.0128808	0.0173813	0.0845122	0.00899998	0.182	0.1336	1	0
ENSMUSG00000029838	Ptn	0.0128873	0.0126692	-0.101004	0.0165574	0.4134	0.474	1	0
ENSMUSG00000016541	Atxn10	0.0130564	0.0135176	-0.0926413	0.0192194	0.3062	0.372	1	0
ENSMUSG00000032557	Uba5	0.0130718	0.0196961	-0.0698065	0.0135417	0.1026	0.1496	1	0
ENSMUSG00000036273	Lrrk2	0.0130987	0.0145446	-0.0873126	0.0278852	0.7326	0.7922	1	0
ENSMUSG00000025812	Pard3	0.0131407	0.00958659	-0.124631	0.0197328	0.9074	0.9276	1	0
ENSMUSG00000026594	Ralgps2	0.0133309	0.012739	-0.105227	0.00548128	0.349	0.4086	1	0
ENSMUSG00000050808	Muc15	0.0133637	0.0225431	-0.0858618	0.01918	0.144	0.1994	1	0
ENSMUSG00000041624	Gucy1a2	0.0136131	0.0215681	-0.108992	0.0184151	0.6976	0.7528	1	0	SFARI					2	0
ENSMUSG00000038916	Soga3	0.0137172	0.0189384	-0.0921588	0.0300937	0.3532	0.4394	1	0
ENSMUSG00000024068	Spast	0.0137768	0.029445	-0.0857001	0.0204628	0.1212	0.181	1	0	SFARI;EAGLE		Moderate	8.1	Discordant	1	0
ENSMUSG00000102869	Norad	0.0138132	0.0123006	0.0962079	0.0101964	0.2148	0.1646	1	0
ENSMUSG00000040268	Plekha1	0.0139136	0.0181591	-0.0887123	0.0195836	0.2262	0.2866	1	0
ENSMUSG00000022594	Lynx1	0.0139363	0.0168285	-0.0756	0.0134293	0.1396	0.1904	1	0
ENSMUSG00000059796	Eif4a1	0.0140528	0.0210883	0.104311	0.0198437	0.3036	0.2442	1	0
ENSMUSG00000028843	Sh3bgrl3	0.0140618	0.0164273	0.0791518	0.0115153	0.1588	0.1144	1	0
ENSMUSG00000029319	Coq2	0.0141633	0.011356	-0.0658921	0.0121615	0.139	0.1892	1	0
ENSMUSG00000106515	Gm30382	0.0141971	0.0149674	-0.122155	0.0260666	0.2116	0.2678	1	0
ENSMUSG00000025499	Hras	0.0142776	0.0179405	0.0926502	0.022109	0.2162	0.1616	1	0	SFARI					1	0
ENSMUSG00000002845	Tmem39a	0.014501	0.0126896	-0.0599988	0.0116173	0.0946	0.138	1	0
ENSMUSG00000033676	Gabrb3	0.0145278	0.0116298	-0.0812178	0.0246134	0.9764	0.9898	1	0	SFARI					1	0
ENSMUSG00000079157	Nalf1	0.0146346	0.0145915	-0.205742	0.0488659	0.32	0.3698	1	0
ENSMUSG00000031918	Mtmr2	0.0146578	0.0296398	-0.0677765	0.00980166	0.0958	0.1456	1	0
ENSMUSG00000002190	Clgn	0.0146722	0.0233704	-0.0648428	0.0155372	0.0752	0.118	1	0
ENSMUSG00000042064	Myo3b	0.0147153	0.0245753	-0.141217	0.0266175	0.1912	0.252	1	0
ENSMUSG00000085631	9630028H03Rik	0.0148255	0.0180503	-0.0989808	0.0152547	0.4238	0.4906	1	0
ENSMUSG00000020954	Strn3	0.0148841	0.0156003	-0.109748	0.0178188	0.7254	0.7788	1	0
ENSMUSG00000038369	Ncoa6	0.0150013	0.0135556	-0.0782845	0.029872	0.3058	0.3798	1	0
ENSMUSG00000031442	Mcf2l	0.0150097	0.0182504	0.141642	0.0261634	0.546	0.509	1	0
ENSMUSG00000031840	Rab3a	0.0151088	0.0151014	0.0910034	0.0144324	0.1928	0.1464	1	0
ENSMUSG00000051951	Xkr4	0.0151278	0.0128068	-0.0860908	0.0237935	0.9002	0.9182	1	0
ENSMUSG00000023965	Fbxl17	0.0151281	0.00886849	-0.116162	0.0104747	0.8516	0.8776	1	0
ENSMUSG00000030199	Etv6	0.0151328	0.0320651	-0.104041	0.0278765	0.1862	0.2552	0.916057	0.187701
ENSMUSG00000020648	Dus4l	0.015179	0.0210353	-0.0653487	0.0210587	0.063	0.1072	0.85393	0.326622
ENSMUSG00000101930	Gm5441	0.0153218	0.0214205	-0.11049	0.0318063	0.2304	0.2964	0.82607	0.388919
ENSMUSG00000057335	Cep170	0.0153431	0.0247872	-0.0831078	0.027987	0.3522	0.426	1	0
ENSMUSG00000036469	Marchf1	0.0153996	0.0120222	0.111154	0.0444874	0.3634	0.2998	1	0
ENSMUSG00000034235	Usp54	0.0154292	0.0233082	-0.0673811	0.0183788	0.084	0.1288	1	0
ENSMUSG00000061911	Myt1l	0.0155092	0.0261341	-0.0979758	0.0293433	0.9844	0.982	1	0	SFARI;EAGLE;TADA	7.02e-08	Definitive	20.35	Concordant	1	0
ENSMUSG00000020048	Hsp90b1	0.0155139	0.0203412	0.11012	0.026575	0.3274	0.266	1	0
ENSMUSG00000041907	Gpr45	0.0155198	0.0184964	-0.0781503	0.0127652	0.1482	0.1982	1	0
ENSMUSG00000012405	Rpl15	0.0155361	0.0191463	0.0631661	0.0094393	0.1228	0.082	1	0
ENSMUSG00000038702	Dsel	0.0156362	0.0115691	-0.0776464	0.00961619	0.1456	0.1932	1	0
ENSMUSG00000026944	Abca2	0.0157213	0.0208474	0.0763024	0.0188294	0.2228	0.1674	1	0
ENSMUSG00000059921	Unc5c	0.0157847	0.0328533	-0.225168	0.066914	0.376	0.4426	0.804292	0.437616
ENSMUSG00000025656	Arhgef9	0.0158286	0.00960814	-0.09426	0.0118212	0.774	0.833	1	0	SFARI;EAGLE		Definitive	14.2	Concordant	1	1
ENSMUSG00000037210	Fam193a	0.0158724	0.0159373	-0.0729555	0.0218698	0.5364	0.6092	1	0
ENSMUSG00000040430	Pitpnc1	0.0159727	0.0253012	-0.118791	0.0278339	0.5436	0.6136	1	0
ENSMUSG00000071252	2210408I21Rik	0.015974	0.0278351	-0.124682	0.0401102	0.4024	0.479	0.856738	0.320343
ENSMUSG00000060882	Kcnd2	0.0160714	0.0320415	-0.070952	0.0167594	1	1	1	0	SFARI					2	0
ENSMUSG00000045975	C2cd2	0.0161554	0.0207629	-0.0860519	0.0240046	0.114	0.1646	1	0
ENSMUSG00000011257	Pabpc4	0.0163062	0.0191642	0.136759	0.0183917	0.331	0.2794	1	0
ENSMUSG00000031626	Sorbs2	0.0163692	0.0337661	-0.113471	0.0337084	0.9394	0.9708	1	0
ENSMUSG00000041762	Gpr155	0.0164073	0.0204853	-0.132216	0.0347183	0.4886	0.5562	1	0
ENSMUSG00000027722	Spata5	0.0165335	0.0139228	-0.103951	0.0276566	0.3048	0.3662	1	0
ENSMUSG00000032047	Acat1	0.0165429	0.0204433	-0.0859917	0.0171517	0.2588	0.3232	1	0
ENSMUSG00000000826	Dnajc5	0.016568	0.0256705	-0.0798242	0.0195886	0.242	0.3014	1	0
ENSMUSG00000039428	Tmem135	0.0166301	0.0172741	-0.0967284	0.0162929	0.4302	0.4932	1	0
ENSMUSG00000098097	6530403H02Rik	0.0166303	0.0214401	-0.143411	0.0462242	0.7242	0.749	1	0
ENSMUSG00000033439	Trmt13	0.0166572	0.00708137	-0.0495181	0.00884423	0.1448	0.1916	1	0
ENSMUSG00000032518	Rpsa	0.0166757	0.0358622	0.105766	0.0230654	0.2336	0.1704	1	0
ENSMUSG00000047766	Lrrc49	0.0167095	0.0312087	-0.0788629	0.0314373	0.4306	0.517	1	0
ENSMUSG00000019828	Grm1	0.0167286	0.0142955	-0.103637	0.0186677	0.8706	0.8994	1	0
ENSMUSG00000036617	Etl4	0.0167674	0.0100152	-0.112018	0.0193449	0.6258	0.6722	1	0
ENSMUSG00000026111	Unc50	0.0167902	0.0184215	0.0665511	0.0133775	0.1184	0.0796	1	0
ENSMUSG00000025370	Cdh9	0.016801	0.0281109	-0.122591	0.020523	0.61	0.6884	1	0	SFARI					2	0
ENSMUSG00000019986	Ahi1	0.0168946	0.0292825	-0.1194	0.0401852	0.8482	0.9082	0.829333	0.381623	SFARI						1
ENSMUSG00000041881	Ndufa7	0.0169623	0.0121867	0.0638871	0.0100338	0.163	0.1188	1	0
ENSMUSG00000034377	Tulp4	0.0169936	0.0232221	-0.101768	0.0231753	0.3064	0.375	1	0
ENSMUSG00000040524	Zfp609	0.0170112	0.0286634	-0.0926563	0.0253498	0.4188	0.487	1	0
ENSMUSG00000024302	Dtna	0.0170623	0.0199888	-0.093117	0.0211901	0.5658	0.6308	1	0
ENSMUSG00000021991	Cacna2d3	0.0171554	0.023665	-0.0728651	0.0183085	0.9992	0.999	1	0	SFARI;EAGLE		Limited	3.75	Discordant	1	0
ENSMUSG00000039197	Adk	0.0172064	0.0151199	-0.0611601	0.0129856	0.2088	0.2662	1	0	SFARI					2	0
ENSMUSG00000028426	Rad23b	0.0172782	0.0101785	-0.0749303	0.0166096	0.2084	0.2608	1	0
ENSMUSG00000003363	Pld3	0.017281	0.0197352	0.101635	0.0173761	0.4228	0.3572	1	0
ENSMUSG00000035047	Kri1	0.01729	0.0206997	-0.049211	0.00865698	0.0772	0.1172	1	0
ENSMUSG00000097797	Gm26901	0.0173009	0.0115952	-0.0671671	0.015118	0.1562	0.2064	1	0
ENSMUSG00000010914	Pdhx	0.0173207	0.0278757	-0.0610683	0.0126953	0.0868	0.1302	1	0
ENSMUSG00000030854	Ptpn5	0.0173424	0.0251656	0.106731	0.0241764	0.838	0.8126	1	0
ENSMUSG00000027652	Ralgapb	0.0173535	0.0164266	-0.0987068	0.0318982	0.4308	0.5046	1	0	SFARI					1	0
ENSMUSG00000005886	Ncoa2	0.0174819	0.0315594	-0.10207	0.0233457	0.5216	0.5938	1	0
ENSMUSG00000030105	Arl8b	0.0175147	0.0135602	-0.0717246	0.00942642	0.193	0.2456	1	0
ENSMUSG00000020903	Stx8	0.0176764	0.0240674	-0.0848429	0.027929	0.2038	0.2644	1	0
ENSMUSG00000032324	Tspan3	0.0176793	0.0105049	0.0895164	0.0138254	0.2894	0.2356	1	0
ENSMUSG00000018417	Myo1b	0.0178225	0.0244599	-0.08997	0.0214901	0.4944	0.5638	1	0
ENSMUSG00000024238	Zeb1	0.0178945	0.0278902	-0.121063	0.0212988	0.857	0.884	1	0
ENSMUSG00000016349	Eef1a2	0.018045	0.0233317	0.103225	0.0169305	0.2522	0.1988	1	0	SFARI						1
ENSMUSG00000021051	Ppp2r5e	0.0180727	0.0176181	-0.0771004	0.0163141	0.4192	0.4858	1	0
ENSMUSG00000006299	Aamp	0.0181284	0.0281332	0.0683936	0.016877	0.142	0.097	1	0
ENSMUSG00000020271	Fbxw11	0.0181685	0.0154496	-0.0782717	0.0150121	0.2564	0.3158	1	0
ENSMUSG00000021719	Rgs7bp	0.0182789	0.0222644	-0.114774	0.0410215	0.8084	0.8568	0.860425	0.3121
ENSMUSG00000022012	Enox1	0.0184758	0.0271556	-0.119736	0.0399927	0.8718	0.9252	0.919414	0.180196
ENSMUSG00000022240	Ctnnd2	0.0186126	0.0143157	-0.080614	0.012945	0.9894	0.994	1	0	SFARI					2	0
ENSMUSG00000006191	Cdkal1	0.018677	0.0134263	-0.105055	0.00810468	0.389	0.4468	1	0
ENSMUSG00000033972	Zfp944	0.0186849	0.0186495	-0.0484402	0.00903631	0.1038	0.1468	1	0
ENSMUSG00000047712	Ust	0.0187612	0.0154716	-0.103289	0.0175713	0.3936	0.457	1	0
ENSMUSG00000018326	Ywhab	0.0187857	0.0196649	0.110666	0.024379	0.2726	0.2194	1	0
ENSMUSG00000034751	Mast4	0.0187922	0.0129057	-0.094337	0.0194929	0.1128	0.1586	1	0
ENSMUSG00000022551	Cyc1	0.0188494	0.0289558	0.0733254	0.0162521	0.1726	0.1256	1	0
ENSMUSG00000039531	Zup1	0.0190277	0.0290372	-0.0881199	0.0241394	0.2078	0.2714	1	0
ENSMUSG00000032897	Nfyc	0.0190441	0.0177118	-0.0761795	0.0137103	0.3646	0.4338	1	0
ENSMUSG00000028975	Pex14	0.0191553	0.0160466	-0.0693871	0.0183719	0.1458	0.1944	1	0
ENSMUSG00000063870	Chd4	0.0192267	0.0265237	0.127459	0.0301144	0.5826	0.537	1	0
ENSMUSG00000060487	Samd5	0.0194619	0.029213	-0.113857	0.0260443	0.5908	0.6652	1	0
ENSMUSG00000036882	Arhgap33	0.0197622	0.0325299	0.121893	0.0231257	0.389	0.3336	1	0
ENSMUSG00000037646	Vps13b	0.0198429	0.0207854	-0.0940301	0.0264734	0.828	0.8666	1	0	SFARI;EAGLE		Moderate	6.35	Discordant	1	1
ENSMUSG00000086220	Gm16599	0.0198695	0.0181733	-0.0695818	0.0170601	0.204	0.2606	1	0
ENSMUSG00000061136	Prpf40a	0.0198875	0.0351839	-0.0927261	0.0269573	0.397	0.4668	1	0
ENSMUSG00000024109	Nrxn1	0.019996	0.0137553	-0.0895257	0.0167682	0.9968	0.9992	1	0	SFARI;EAGLE		Definitive	143.75	Concordant	1	0
ENSMUSG00000025078	Nhlrc2	0.0200462	0.0217521	-0.0586518	0.0136734	0.0892	0.1304	1	0
ENSMUSG00000026888	Grb14	0.0200487	0.033329	-0.115029	0.0273364	0.1214	0.1728	0.998774	0.00274041
ENSMUSG00000040282	Cdin1	0.0200952	0.0283603	-0.08789	0.0237618	0.3166	0.3832	1	0
ENSMUSG00000018995	Nars2	0.0201051	0.0192634	-0.0700504	0.0213298	0.2692	0.3302	1	0
ENSMUSG00000025192	Entpd7	0.0201132	0.0156094	-0.0486678	0.0139464	0.1224	0.1696	1	0
ENSMUSG00000022195	6030458C11Rik	0.0201591	0.017935	-0.0669374	0.0244578	0.1324	0.1826	1	0
ENSMUSG00000064210	Ano6	0.0202473	0.0272962	-0.0824615	0.0221501	0.4032	0.4744	1	0
ENSMUSG00000058192	Zfp846	0.0204195	0.0276839	-0.0568587	0.01377	0.1004	0.1454	1	0
ENSMUSG00000024346	Pfdn1	0.0204727	0.0177011	-0.0733978	0.0131057	0.1762	0.2274	1	0
ENSMUSG00000095253	Zfp799	0.0205232	0.0146206	-0.0729194	0.0140927	0.2186	0.2742	1	0
ENSMUSG00000038690	Atp5j2	0.0206518	0.0173814	0.0822091	0.012261	0.163	0.119	1	0
ENSMUSG00000038274	Fau	0.0206661	0.0160821	0.0916852	0.011712	0.213	0.1682	1	0
ENSMUSG00000035045	Zc3h12b	0.0208557	0.0206411	-0.0993526	0.0243735	0.3322	0.3966	1	0
ENSMUSG00000053046	Brsk2	0.020891	0.027052	0.060309	0.0131765	0.1704	0.1236	1	0	SFARI;EAGLE;TADA	1.24e-06	Moderate	7.7	Discordant	1	1
ENSMUSG00000031708	Tecr	0.0208964	0.0165901	0.1154	0.0208542	0.3946	0.3458	1	0
ENSMUSG00000006678	Pola1	0.020991	0.0284801	-0.0954469	0.023337	0.2854	0.348	1	0
ENSMUSG00000024054	Smchd1	0.0209982	0.0369486	-0.0875676	0.0232883	0.2998	0.368	1	0
ENSMUSG00000036199	Ndufa13	0.0210459	0.0356302	0.0668946	0.0212848	0.1718	0.1226	1	0
ENSMUSG00000003299	Mrpl4	0.021093	0.0311531	0.0714806	0.015504	0.1328	0.0886	1	0
ENSMUSG00000038301	Snx10	0.0210949	0.0240792	-0.0712854	0.0211016	0.286	0.3514	1	0
ENSMUSG00000029169	Dhx15	0.0212456	0.0305129	-0.0793489	0.0217554	0.3434	0.4154	1	0
ENSMUSG00000029328	Hnrnpdl	0.0213002	0.0259828	0.122286	0.0180304	0.5818	0.5446	1	0
ENSMUSG00000040913	Fbxw4	0.0213439	0.0161136	-0.0621311	0.029512	0.297	0.3656	1	0
ENSMUSG00000025006	Sorbs1	0.0213773	0.017145	-0.119304	0.0104381	0.8662	0.8938	1	0
ENSMUSG00000026159	Agfg1	0.021668	0.0327057	-0.0692863	0.0193594	0.2886	0.3508	1	0
ENSMUSG00000027134	Lpcat4	0.0217386	0.0199042	0.0879819	0.021478	0.2508	0.1974	1	0
ENSMUSG00000096768	Gm47283	0.0217463	0.035909	0.114425	0.0100186	0.4402	0.3824	1	0
ENSMUSG00000031166	Wdr13	0.0217469	0.0226972	0.081772	0.0110699	0.2284	0.1772	1	0
ENSMUSG00000028552	Eps15	0.0218288	0.0367224	-0.0825954	0.0268067	0.1294	0.1854	0.955703	0.099052
ENSMUSG00000031059	Ndufb11	0.0218513	0.0190279	0.0587872	0.00468763	0.1114	0.0754	1	0
ENSMUSG00000031633	Slc25a4	0.0218973	0.00672279	0.0806104	0.00177864	0.2624	0.2138	1	0
ENSMUSG00000025968	Ndufs1	0.0219268	0.0333507	-0.0700039	0.0188477	0.2844	0.3534	1	0
ENSMUSG00000064293	Cntn4	0.0219733	0.0298926	-0.114506	0.0334063	0.936	0.9436	1	0	SFARI					2	0
ENSMUSG00000038372	Gmds	0.0219885	0.0323825	-0.108628	0.0206867	0.3342	0.3958	1	0
ENSMUSG00000022956	Atp5o.1	0.02203	0.0204357	0.0745121	0.0098339	0.1686	0.1258	1	0
ENSMUSG00000024431	Nr3c1	0.0220335	0.0127636	-0.0716039	0.00768934	0.3424	0.405	1	0
ENSMUSG00000028086	Fbxw7	0.0220452	0.0219011	-0.0868277	0.0138356	0.49	0.5506	1	0
ENSMUSG00000022255	Mtdh	0.0221147	0.04447	-0.0946632	0.0288517	0.471	0.5604	1	0
ENSMUSG00000052544	St6galnac3	0.0221837	0.011251	-0.10698	0.0146823	0.4376	0.4918	1	0
ENSMUSG00000032826	Ank2	0.0223504	0.0145335	-0.0778899	0.0103345	0.9626	0.9822	1	0	SFARI;EAGLE;TADA	0.00174365	Moderate	10.8	Discordant	1	0
ENSMUSG00000027346	Gpcpd1	0.0223799	0.0314485	-0.0764773	0.0114084	0.4438	0.514	1	0
ENSMUSG00000042680	Garem1	0.0225003	0.0186311	-0.0821355	0.0197368	0.5046	0.5672	1	0
ENSMUSG00000024851	Pitpnm1	0.0225199	0.0232665	0.0685079	0.0137606	0.1224	0.0846	1	0
ENSMUSG00000070493	Chchd2	0.0225356	0.0239584	0.0929483	0.0140238	0.2136	0.1662	1	0
ENSMUSG00000040877	Wdr25	0.0225995	0.024528	-0.0573312	0.0130007	0.073	0.1086	1	0
ENSMUSG00000049184	Purg	0.0226538	0.025775	-0.0799914	0.0215723	0.2842	0.3472	1	0
ENSMUSG00000056153	Socs6	0.0229145	0.0172653	-0.0516929	0.0137906	0.2096	0.2652	1	0
ENSMUSG00000028677	Rnf220	0.0229369	0.0357831	-0.0818441	0.0157725	0.1456	0.1952	1	0
ENSMUSG00000009555	Cdk9	0.0230467	0.0134272	0.0896215	0.0183671	0.2652	0.2162	1	0
ENSMUSG00000061313	Ddhd2	0.0232136	0.0422611	-0.0934878	0.0220251	0.3126	0.3802	1	0	SFARI					2	0
ENSMUSG00000032480	Dhx30	0.0232412	0.0230736	-0.0720722	0.0217859	0.3156	0.3846	1	0	SFARI						1
ENSMUSG00000032537	Ephb1	0.0232727	0.0371692	-0.102131	0.0309134	0.7584	0.8114	1	0	SFARI					3	0
ENSMUSG00000039697	Ncoa7	0.0233466	0.0103155	-0.0883449	0.00750083	0.4616	0.5244	1	0
ENSMUSG00000027447	Cst3	0.0234021	0.0216677	0.0985479	0.0160486	0.2686	0.224	1	0
ENSMUSG00000026245	Farsb	0.0235068	0.0256664	-0.0787131	0.0163298	0.2292	0.2834	1	0
ENSMUSG00000038696	Mapkap1	0.023821	0.0258518	-0.0615409	0.0222276	0.3842	0.4594	1	0
ENSMUSG00000034157	Cipc	0.0238255	0.035805	-0.096775	0.0277364	0.2766	0.3332	1	0
ENSMUSG00000057098	Ebf1	0.0240165	0.0508887	-0.127541	0.0539205	0.5916	0.6652	1	0
ENSMUSG00000022790	Igsf11	0.0240826	0.0368964	-0.10671	0.0262726	0.5274	0.583	1	0
ENSMUSG00000044176	Spink10	0.0242275	0.0277849	-0.0651112	0.0162879	0.1074	0.1516	1	0
ENSMUSG00000024261	Syt4	0.0242787	0.0401429	0.129808	0.0188108	0.3876	0.3328	1	0
ENSMUSG00000041308	Sntb2	0.0242897	0.0307794	-0.0665403	0.0273869	0.4368	0.5128	1	0
ENSMUSG00000034780	B3galt1	0.0243695	0.0398421	-0.112616	0.0300378	0.9512	0.962	1	0
ENSMUSG00000050608	Micos10	0.0244974	0.0283081	0.0844223	0.0137585	0.2352	0.187	1	0
ENSMUSG00000038954	Supt3	0.0246056	0.0452695	-0.103095	0.0373901	0.2172	0.2858	0.999007	0.00222034
ENSMUSG00000026425	Srgap2	0.0246549	0.0222245	-0.0812841	0.0280808	0.4972	0.5734	1	0
ENSMUSG00000039230	Tbcd	0.0247895	0.0465918	-0.0801288	0.0205616	0.2	0.259	1	0
ENSMUSG00000032586	Traip	0.0248972	0.0194685	0.100056	0.018201	0.501	0.4566	1	0
ENSMUSG00000024524	Gnal	0.0249215	0.0512101	-0.0947968	0.0260245	0.8896	0.9308	0.974631	0.0567279
ENSMUSG00000017831	Rab5a	0.0249993	0.0181509	-0.0609071	0.0109699	0.1374	0.1814	1	0
ENSMUSG00000025316	Banp	0.0250515	0.0233714	-0.0768823	0.0165863	0.2072	0.2586	1	0
ENSMUSG00000067942	Zfp160	0.0250588	0.0189396	-0.0704976	0.0065191	0.1342	0.1766	1	0
ENSMUSG00000013787	Ehmt2	0.0252267	0.0218346	0.0611529	0.017328	0.2172	0.1648	1	0
ENSMUSG00000055109	Gm15155	0.025259	0.0249936	0.143895	0.0227473	0.7172	0.709	1	0	SFARI;EAGLE		Definitive	17.6	Discordant	2	0
ENSMUSG00000058546	Rpl23a	0.0252678	0.0423507	0.0691962	0.0198372	0.1594	0.112	1	0
ENSMUSG00000020102	Slc16a7	0.0253938	0.0220017	-0.0860879	0.020442	0.2998	0.3556	1	0
ENSMUSG00000110710	C78859	0.0254647	0.0246127	0.126726	0.0220929	0.7592	0.7614	1	0
ENSMUSG00000073702	Rpl31	0.0257004	0.0493456	0.104183	0.0225366	0.2538	0.1976	1	0
ENSMUSG00000029054	Gabrd	0.0257288	0.0357097	0.0975086	0.0242384	0.4826	0.423	1	0
ENSMUSG00000032217	Rnf111	0.0258088	0.0252227	-0.0724048	0.0169916	0.3508	0.4122	1	0
ENSMUSG00000031327	Chic1	0.0258468	0.0238436	-0.051603	0.0120942	0.216	0.2724	1	0
ENSMUSG00000011831	Evi5	0.0258686	0.017072	-0.0734422	0.00518217	0.3562	0.4144	1	0
ENSMUSG00000038332	Sesn1	0.025881	0.0391392	-0.0675702	0.01262	0.3902	0.4612	1	0
ENSMUSG00000041351	Rap1gap	0.0259171	0.0323285	0.127003	0.0288136	0.6686	0.6294	1	0
ENSMUSG00000060961	Slc4a4	0.0259225	0.0316982	-0.085738	0.0167113	0.9358	0.9354	1	0
ENSMUSG00000017760	Ctsa	0.0259354	0.0173226	0.0421099	0.00536364	0.111	0.0758	1	0
ENSMUSG00000062203	Gspt1	0.0259633	0.0348399	-0.0626799	0.0252091	0.2454	0.3108	1	0
ENSMUSG00000111752	Gm38575	0.0260183	0.0159696	-0.0467849	0.00972811	0.0874	0.1236	1	0
ENSMUSG00000061298	Agbl4	0.0260266	0.0276441	-0.118542	0.0413692	0.4876	0.5542	0.932419	0.151116	SFARI					2	0
ENSMUSG00000063296	Tmem117	0.0260625	0.0400296	-0.0913657	0.0371224	0.303	0.371	0.859133	0.314988
ENSMUSG00000025439	Clns1a	0.0261467	0.0236681	-0.0607289	0.0105864	0.1088	0.1488	1	0
ENSMUSG00000024083	Pja2	0.0262225	0.0293013	-0.0693071	0.0204608	0.6508	0.721	1	0
ENSMUSG00000029705	Cux1	0.0262695	0.0379195	-0.101876	0.0303215	0.4344	0.4998	1	0	SFARI					2	0
ENSMUSG00000047675	Rps8	0.0264002	0.0435239	0.0668801	0.0113123	0.2276	0.1738	1	0
ENSMUSG00000038115	Ano2	0.0264376	0.0413838	-0.0875673	0.0420662	0.399	0.4746	0.884474	0.258324
ENSMUSG00000044216	Kcnj4	0.026514	0.0203797	0.0815878	0.00869354	0.2276	0.1804	1	0
ENSMUSG00000031508	Ankrd10	0.0265544	0.0243846	-0.0797553	0.0125105	0.2944	0.3494	1	0
ENSMUSG00000097156	Gm3764	0.0267597	0.0248896	-0.0660607	0.0123806	0.153	0.1996	1	0
ENSMUSG00000096934	Gm26658	0.0268198	0.0268244	0.0744479	0.0188123	0.1356	0.094	1	0
ENSMUSG00000008763	Man1a2	0.0269047	0.0298379	-0.0969371	0.0223645	0.616	0.677	1	0
ENSMUSG00000055531	Cpsf6	0.0269575	0.0319271	-0.0743293	0.024881	0.4276	0.5016	1	0
ENSMUSG00000038608	Dock10	0.0270127	0.0141763	-0.0785288	0.0209997	0.544	0.5982	1	0
ENSMUSG00000031540	Kat6a	0.0270237	0.0301911	-0.0573417	0.0204133	0.2694	0.3318	1	0	SFARI					2	1
ENSMUSG00000027366	Sppl2a	0.027042	0.0335098	-0.0695708	0.0170603	0.336	0.4048	1	0
ENSMUSG00000086040	Wipf3	0.0271255	0.0183333	-0.0957084	0.02041	0.4632	0.5232	1	0
ENSMUSG00000075706	Gpx4	0.0271387	0.0308987	0.0705122	0.0122498	0.1312	0.0922	1	0
ENSMUSG00000028078	Dclk2	0.0271963	0.0426527	-0.080803	0.029614	0.3422	0.4114	1	0
ENSMUSG00000034007	Scaper	0.027208	0.0330783	-0.101197	0.0237105	0.4836	0.5462	1	0
ENSMUSG00000029554	Mad1l1	0.0272338	0.0377723	-0.0474953	0.0134051	0.0782	0.117	1	0
ENSMUSG00000036613	Eipr1	0.027239	0.0264738	-0.0759308	0.0126977	0.2076	0.2578	1	0
ENSMUSG00000025162	Csnk1d	0.0273359	0.00586166	0.0595115	0.00552793	0.1362	0.0996	1	0
ENSMUSG00000024400	Wdr33	0.0275391	0.0253247	-0.0716713	0.0264443	0.5882	0.6654	1	0
ENSMUSG00000059182	Skap2	0.0275425	0.0231722	-0.0777294	0.0145375	0.1356	0.1798	1	0
ENSMUSG00000092368	A930015D03Rik	0.0275561	0.0239506	-0.0712747	0.0166543	0.2928	0.347	1	0
ENSMUSG00000019852	Arfgef3	0.0275577	0.0359156	-0.0769532	0.0247812	0.4318	0.4962	1	0
ENSMUSG00000022961	Son	0.0276185	0.0400638	0.117792	0.0209229	0.8366	0.8054	1	0	SFARI;EAGLE		Moderate	11	Discordant	1	1
ENSMUSG00000042350	Arel1	0.027657	0.03138	0.108273	0.0259444	0.5666	0.515	1	0
ENSMUSG00000030515	Tarsl2	0.0277088	0.0222262	-0.0678146	0.0179082	0.1538	0.2024	1	0
ENSMUSG00000005566	Trim28	0.0278851	0.0384984	0.0540748	0.0181588	0.1136	0.0732	1	0
ENSMUSG00000074794	Arrdc3	0.0279579	0.0327915	-0.0605002	0.0168323	0.0684	0.1058	1	0
ENSMUSG00000068250	Amn1	0.0279775	0.0436724	-0.0630896	0.0106297	0.1	0.1412	1	0
ENSMUSG00000074782	4833422C13Rik	0.0280292	0.0344533	-0.0676982	0.0132786	0.1346	0.1796	1	0
ENSMUSG00000008668	Rps18	0.0281496	0.0346387	0.0611262	0.0143216	0.1288	0.0904	1	0
ENSMUSG00000052837	Junb	0.0281697	0.0266692	0.111677	0.0248716	0.2032	0.1572	1	0
ENSMUSG00000029207	Apbb2	0.0281966	0.0299672	-0.103768	0.0223854	0.4612	0.5174	1	0
ENSMUSG00000021546	Hnrnpk	0.0283391	0.0231968	0.102703	0.00968399	0.3982	0.3494	1	0	SFARI					2	1
ENSMUSG00000035864	Syt1	0.028429	0.038977	-0.0844781	0.0280061	0.9986	0.997	1	0	SFARI;TADA	0.016653					1
ENSMUSG00000068457	Uty	0.0286612	0.0335078	-0.0763473	0.0198136	0.5776	0.6492	1	0
ENSMUSG00000064043	Trerf1	0.0286893	0.0415667	-0.0903149	0.0282508	0.779	0.8336	1	0
ENSMUSG00000019990	Pde7b	0.0287173	0.015411	-0.092587	0.0239844	0.9816	0.9856	1	0
ENSMUSG00000040594	Ranbp17	0.028856	0.0609451	-0.142051	0.0463065	0.3702	0.4384	0.817077	0.409029	SFARI					2	0
ENSMUSG00000040451	Sgms1	0.0289833	0.0283708	-0.101422	0.0273336	0.36	0.4176	1	0
ENSMUSG00000021270	Hsp90aa1	0.029045	0.0290212	0.128605	0.0331345	0.3556	0.3048	1	0
ENSMUSG00000020634	Ubxn2a	0.0291498	0.0196129	-0.0488632	0.00696225	0.0736	0.1064	1	0
ENSMUSG00000041552	Ptchd1	0.0291757	0.0192852	-0.0716119	0.0118737	0.2158	0.2654	1	0	SFARI;EAGLE		No scorable evidence	0	Discordant	1	0
ENSMUSG00000074829	2010315B03Rik	0.0293107	0.0364881	-0.0546177	0.0131713	0.1014	0.143	1	0
ENSMUSG00000051451	Crebzf	0.0293921	0.0438962	-0.0796221	0.0252902	0.2064	0.26	1	0
ENSMUSG00000063457	Rps15	0.0295186	0.0169959	0.0816287	0.00867847	0.2474	0.201	1	0
ENSMUSG00000024420	Zfp521	0.0296919	0.0351627	-0.0910118	0.0279195	0.2216	0.2764	1	0
ENSMUSG00000117317	Gm49961	0.0297312	0.0398166	-0.0749805	0.0148538	0.1964	0.2484	1	0
ENSMUSG00000044288	Cnr1	0.0299529	0.0238337	-0.0853909	0.0124598	0.4706	0.5428	1	0	SFARI					2	0
ENSMUSG00000116858	Gm49797	0.0299591	0.0306127	-0.0741317	0.0147803	0.2398	0.2932	1	0
ENSMUSG00000027210	Meis2	0.0299668	0.0203636	-0.0788552	0.00796961	0.9774	0.9864	1	0	SFARI;EAGLE;TADA	0.00517313	Moderate	7.5	Discordant	1	1
ENSMUSG00000037174	Elf2	0.0301444	0.0334901	-0.0627648	0.0197318	0.1248	0.1714	1	0
ENSMUSG00000047747	Rnf150	0.0303096	0.0191469	-0.105279	0.021438	0.7252	0.772	1	0
ENSMUSG00000037351	Actr1b	0.03039	0.0349883	0.0894275	0.0162039	0.3456	0.2914	1	0
ENSMUSG00000021764	Ndufs4	0.0303981	0.0211343	-0.0770087	0.0250334	0.3644	0.428	1	0
ENSMUSG00000024530	Prelid3a	0.030508	0.0408401	-0.0843747	0.022357	0.2464	0.3022	1	0
ENSMUSG00000064138	Fam172a	0.030687	0.0322509	-0.0800958	0.0381111	0.5902	0.6518	1	0
ENSMUSG00000070000	Fcho1	0.0306924	0.0436323	0.0898803	0.0172091	0.2514	0.2034	1	0
ENSMUSG00000043929	Klhl15	0.0309285	0.0602744	-0.0790622	0.0315386	0.2784	0.3442	1	0
ENSMUSG00000029211	Gabra4	0.0310574	0.016282	-0.0890116	0.0115371	0.8046	0.8304	1	0	SFARI					2	0
ENSMUSG00000025583	Rptor	0.0311808	0.0509338	-0.0614176	0.0246075	0.313	0.383	1	0
ENSMUSG00000039037	St6galnac5	0.0311939	0.0386043	-0.116983	0.0161079	0.5966	0.6382	1	0
ENSMUSG00000055067	Smyd3	0.0312805	0.0290626	-0.103452	0.0157605	0.8548	0.8688	1	0
ENSMUSG00000040724	Kcna2	0.0312831	0.0477325	0.0709344	0.0175037	0.1368	0.0964	1	0	SFARI						1
ENSMUSG00000041773	Enc1	0.0313011	0.0329885	0.0690172	0.0171455	0.1658	0.1244	1	0	TADA	0.047918
ENSMUSG00000022419	Deptor	0.031365	0.0352587	-0.065102	0.0247585	0.098	0.1386	1	0
ENSMUSG00000022108	Itm2b	0.03139	0.0371499	0.153342	0.02548	0.5054	0.4724	1	0
ENSMUSG00000045078	Rnf216	0.0314757	0.0291084	-0.0678383	0.017113	0.2838	0.3404	1	0
ENSMUSG00000034066	Farp2	0.0314867	0.0197368	-0.0679102	0.0151519	0.1594	0.2054	1	0
ENSMUSG00000027030	Stk39	0.0315694	0.0239871	-0.0759783	0.0122445	0.365	0.426	1	0	SFARI					2	0
ENSMUSG00000097342	Gm26618	0.0316099	0.0532456	-0.0628754	0.0087585	0.105	0.1464	1	0
ENSMUSG00000026202	Tuba4a	0.0317928	0.0388464	0.0801876	0.0236082	0.2136	0.162	1	0
ENSMUSG00000040112	Mrps35	0.0318337	0.0264819	-0.0464048	0.0115541	0.0768	0.112	1	0
ENSMUSG00000020627	Klhl29	0.0318604	0.0396781	-0.0837386	0.0225712	0.8186	0.8666	1	0
ENSMUSG00000052105	Mtcl1	0.0320152	0.0216312	-0.0876227	0.0156545	0.6072	0.6654	1	0
ENSMUSG00000021288	Klc1	0.0322403	0.0458958	0.109577	0.0225026	0.4272	0.3716	1	0
ENSMUSG00000042185	Nfrkb	0.0322461	0.037883	-0.0526237	0.0160628	0.1448	0.1938	1	0
ENSMUSG00000023800	Tiam2	0.0323642	0.0230871	0.108381	0.0131511	0.595	0.5524	1	0
ENSMUSG00000020705	Ddx42	0.0324725	0.0308203	-0.0679516	0.0143808	0.264	0.3202	1	0
ENSMUSG00000024240	Epc1	0.0325086	0.0226364	-0.0735095	0.0131243	0.4496	0.5036	1	0
ENSMUSG00000037492	Zmat4	0.0328857	0.0225964	-0.0733583	0.0161957	0.1952	0.2422	1	0
ENSMUSG00000032786	Alas1	0.0329886	0.0443147	0.0583143	0.012016	0.1304	0.092	1	0
ENSMUSG00000098243	Gm4258	0.0330606	0.0705894	-0.0880278	0.0384718	0.1516	0.2124	1	0
ENSMUSG00000028149	Rap1gds1	0.0331587	0.0607457	-0.0904958	0.0332171	0.5114	0.5882	1	0
ENSMUSG00000008683	Rps15a	0.0332102	0.0460876	0.0627826	0.0171831	0.1418	0.1012	1	0
ENSMUSG00000056211	R3hdm1	0.0336524	0.0404431	-0.0875352	0.0400735	0.9794	0.988	1	0
ENSMUSG00000020672	Sntg2	0.0337313	0.0630497	-0.106361	0.0242935	0.4114	0.4748	1	0	SFARI					2	0
ENSMUSG00000026799	Med27	0.0340854	0.0373046	-0.0633631	0.0166894	0.2702	0.3266	1	0
ENSMUSG00000045100	Slc25a26	0.0341998	0.0202763	-0.058622	0.0130924	0.222	0.2712	1	0
ENSMUSG00000021244	Ylpm1	0.0342292	0.0703201	-0.103232	0.0309819	0.6956	0.7328	1	0
ENSMUSG00000060206	Zfp462	0.0342821	0.0523009	-0.117566	0.0275369	0.5706	0.6222	1	0	SFARI;EAGLE		Moderate	10.6	Discordant	1	1
ENSMUSG00000037058	Paip2	0.0342906	0.0193427	-0.0753116	0.0208024	0.4502	0.5182	1	0
ENSMUSG00000025776	Crispld1	0.0343074	0.0359206	-0.0699417	0.0128693	0.1282	0.1698	1	0
ENSMUSG00000039953	Clstn1	0.0343264	0.0223905	0.0998807	0.0181649	0.4854	0.4484	1	0
ENSMUSG00000003072	Atp5d	0.0344971	0.0219686	0.0776861	0.0129351	0.1956	0.152	1	0
ENSMUSG00000093674	Rpl41	0.034533	0.0487252	0.119236	0.0149458	0.4128	0.3632	1	0
ENSMUSG00000038119	Cdon	0.034534	0.044818	-0.0632686	0.0153692	0.1772	0.2256	1	0	SFARI					3	0
ENSMUSG00000033423	Eri3	0.034583	0.0527594	-0.0748693	0.0254488	0.3106	0.3726	1	0
ENSMUSG00000036282	Naa30	0.0346173	0.0413399	-0.0644687	0.0106135	0.1336	0.1752	1	0
ENSMUSG00000060301	2610008E11Rik	0.0347137	0.0214255	-0.0672854	0.0133245	0.1652	0.2106	1	0
ENSMUSG00000039706	Ldb2	0.034718	0.0381849	-0.0864833	0.022517	0.3782	0.4356	1	0
ENSMUSG00000063887	Nlgn1	0.0348632	0.033329	-0.0467162	0.0153689	1	1	1	0	SFARI					2	0
ENSMUSG00000043940	Wdfy3	0.0348835	0.0490903	-0.0780078	0.0152039	0.4256	0.487	1	0	SFARI;EAGLE;TADA	0.0630417	Definitive	17.2	Concordant	1	0
ENSMUSG00000021262	Evl	0.0348962	0.0525753	-0.0749836	0.0349237	0.3832	0.4502	1	0
ENSMUSG00000067288	Rps28	0.0349711	0.0303629	0.0562397	0.00806963	0.125	0.0892	1	0
ENSMUSG00000037126	Psd	0.0350385	0.0450647	0.0796132	0.0159715	0.2722	0.2236	1	0
ENSMUSG00000032939	Nup93	0.0352574	0.0327056	-0.0914905	0.0116501	0.6354	0.6992	1	0
ENSMUSG00000035268	Pkig	0.0354022	0.0251518	-0.0557718	0.0185535	0.3552	0.417	1	0
ENSMUSG00000021852	Slc35f4	0.0354847	0.0369526	-0.126894	0.0299949	0.3352	0.393	1	0
ENSMUSG00000035545	Leng8	0.0355615	0.0446344	0.107126	0.0342166	0.4242	0.367	1	0
ENSMUSG00000024012	Mtch1	0.0355713	0.0618943	0.0880747	0.0290637	0.3024	0.246	1	0
ENSMUSG00000092083	Kcnb2	0.0356093	0.044383	-0.134448	0.0426609	0.702	0.7412	1	0
ENSMUSG00000006930	Hap1	0.0357237	0.032849	0.096116	0.0226032	0.229	0.1852	1	0
ENSMUSG00000028229	Rmdn1	0.0357532	0.0484347	-0.0836598	0.033495	0.4544	0.5214	1	0
ENSMUSG00000035781	R3hdm4	0.0358322	0.0502975	0.0766954	0.0163707	0.3218	0.267	1	0
ENSMUSG00000029267	Mtf2	0.035907	0.0715279	-0.0770416	0.0294749	0.506	0.5832	1	0
ENSMUSG00000029647	Pan3	0.0361337	0.0369118	-0.08346	0.0185676	0.5494	0.5996	1	0
ENSMUSG00000056999	Ide	0.0363925	0.0461591	-0.063029	0.0252936	0.3016	0.363	1	0
ENSMUSG00000043467	Zbtb37	0.0364424	0.0318142	-0.0428673	0.00857064	0.0826	0.1172	1	0
ENSMUSG00000063087	Gm10125	0.0364503	0.0341939	-0.0666193	0.0183214	0.2276	0.2806	1	0
ENSMUSG00000033342	Plppr5	0.0365505	0.0340352	-0.0802498	0.0233995	0.3806	0.444	1	0
ENSMUSG00000026885	Ttll11	0.0366215	0.074537	-0.087979	0.0301587	0.4244	0.4948	1	0
ENSMUSG00000062006	Rpl34	0.036637	0.0654647	0.0715961	0.0131111	0.1536	0.111	1	0	EAGLE		No scorable evidence	0	Concordant
ENSMUSG00000051853	Arf3	0.0366585	0.028083	0.0805438	0.0106155	0.3286	0.2784	1	0	TADA	0.0920637
ENSMUSG00000042104	Uggt2	0.0367606	0.0274915	-0.0788209	0.018933	0.4278	0.4872	1	0
ENSMUSG00000036097	Slf2	0.0369625	0.02255	-0.0692106	0.0198353	0.4558	0.5138	1	0
ENSMUSG00000020454	Eif4enif1	0.03706	0.0403597	-0.0488717	0.0177344	0.1274	0.1712	1	0
ENSMUSG00000022489	Pde1b	0.0372202	0.0589291	0.125344	0.0413656	0.763	0.749	0.852247	0.330386
ENSMUSG00000014329	Bicc1	0.0372664	0.0259743	-0.0437025	0.0174153	0.0804	0.1148	1	0
ENSMUSG00000057894	Zfp329	0.0372834	0.0153473	-0.0460099	0.0073152	0.1236	0.1622	1	0
ENSMUSG00000030657	Xylt1	0.0373685	0.0385069	-0.0600078	0.0142663	0.1234	0.1652	1	0
ENSMUSG00000049606	Zfp644	0.0374643	0.0675829	-0.0800579	0.025947	0.2294	0.287	1	0
ENSMUSG00000024188	Luc7l	0.037544	0.0359096	-0.0651062	0.0180198	0.2194	0.2718	1	0
ENSMUSG00000038296	Galnt18	0.0375489	0.0799288	-0.142657	0.0545736	0.6826	0.722	0.805798	0.434248
ENSMUSG00000031376	Atp2b3	0.0376315	0.0261798	-0.0533355	0.0112763	0.153	0.1964	1	0
ENSMUSG00000030428	Ttyh1	0.0376717	0.0166013	0.0940775	0.0150965	0.552	0.5144	1	0
ENSMUSG00000037331	Larp1	0.0377232	0.0479364	-0.0677342	0.0170426	0.2224	0.273	1	0
ENSMUSG00000033799	Tasor2	0.037896	0.0221006	-0.059691	0.0100309	0.2978	0.3526	1	0
ENSMUSG00000032985	5730522E02Rik	0.0382684	0.059117	-0.0955569	0.0304343	0.9326	0.9356	1	0
ENSMUSG00000036167	Pphln1	0.038296	0.0732485	-0.0629828	0.0168681	0.12	0.1662	1	0
ENSMUSG00000026349	Ccnt2	0.0384728	0.0398454	-0.0596571	0.0164839	0.4068	0.473	1	0
ENSMUSG00000009863	Sdhb	0.038519	0.0396115	0.0759022	0.0164808	0.216	0.169	1	0
ENSMUSG00000037148	Arhgap10	0.0386897	0.0477177	-0.0829125	0.0156206	0.7456	0.7968	1	0
ENSMUSG00000084799	Ino80dos	0.0387571	0.0749293	-0.0746405	0.0230326	0.1792	0.2338	1	0
ENSMUSG00000058297	Spock2	0.0387649	0.0567462	0.0925421	0.0231711	0.4222	0.3646	1	0
ENSMUSG00000027254	Map1a	0.0388019	0.0306855	0.0765261	0.00973347	0.2278	0.1842	1	0	SFARI;EAGLE;TADA	0.00686837	No scorable evidence	0	Discordant	1	0
ENSMUSG00000021589	Rhobtb3	0.0389223	0.0261713	-0.0433166	0.0111371	0.0776	0.1098	1	0
ENSMUSG00000037605	Adgrl3	0.0390306	0.0388192	-0.0558188	0.00935266	0.9984	0.999	1	0
ENSMUSG00000019775	Rgs17	0.0392091	0.0473052	-0.0729179	0.0408859	0.547	0.6164	1	0
ENSMUSG00000063142	Kcnma1	0.0394175	0.0713435	-0.0859983	0.0168822	0.9482	0.9718	1	0	SFARI					2	0
ENSMUSG00000032637	Atxn2l	0.0396881	0.0377636	0.0840192	0.0106225	0.3052	0.2572	1	0
ENSMUSG00000028745	Capzb	0.0397332	0.049465	-0.0498019	0.0195395	0.16	0.21	1	0
ENSMUSG00000033793	Atp6v1h	0.0397433	0.058545	-0.0976263	0.0307985	0.5146	0.5834	1	0
ENSMUSG00000057069	Ero1b	0.0398061	0.023019	-0.0503451	0.0119297	0.0996	0.135	1	0
ENSMUSG00000004317	Clcn5	0.0399341	0.030907	-0.0510013	0.0119246	0.1048	0.142	1	0
ENSMUSG00000026207	Speg	0.0399955	0.0351922	0.116656	0.0201051	0.5138	0.4772	1	0
ENSMUSG00000024817	Uhrf2	0.0400179	0.0335994	-0.0686806	0.0160504	0.3412	0.4018	1	0
ENSMUSG00000032624	Eml4	0.0400292	0.0350828	-0.082074	0.0169804	0.393	0.4456	1	0
ENSMUSG00000047085	Lrrc4b	0.0404006	0.0635715	0.0758477	0.0333513	0.2076	0.155	0.906424	0.209242
ENSMUSG00000031930	Wwp2	0.0404471	0.025652	-0.0537821	0.00901439	0.1202	0.1582	1	0
ENSMUSG00000027799	Nbea	0.040457	0.0549774	-0.0719095	0.0148496	0.9922	0.9948	1	0	SFARI					1	1
ENSMUSG00000021870	Slmap	0.0404626	0.0652664	-0.1079	0.0364317	0.6674	0.7114	1	0
ENSMUSG00000020790	Ankfy1	0.040473	0.0290513	-0.0676888	0.0161626	0.2466	0.2944	1	0
ENSMUSG00000021650	Ptcd2	0.040504	0.0338183	0.0497424	0.00779688	0.1184	0.0846	1	0
ENSMUSG00000025576	Rbfox3	0.0405904	0.0479837	0.105724	0.0135476	0.8812	0.8748	1	0
ENSMUSG00000026504	Sdccag8	0.0406613	0.0535322	-0.0758518	0.0264969	0.4206	0.4868	1	0
ENSMUSG00000028158	Mttp	0.0406899	0.0307953	-0.0506885	0.0143821	0.1004	0.1376	1	0
ENSMUSG00000020458	Rtn4	0.0407049	0.0367764	0.11573	0.0442072	0.608	0.5594	1	0
ENSMUSG00000028152	Tspan5	0.0407757	0.0396798	-0.0862097	0.0260356	0.6238	0.676	1	0
ENSMUSG00000031673	Cdh11	0.0408655	0.0421436	-0.126785	0.0317272	0.522	0.568	1	0	SFARI					2	0
ENSMUSG00000079056	Kcnip3	0.0410552	0.0345707	-0.0776793	0.0245923	0.365	0.427	1	0
ENSMUSG00000015759	Cnih1	0.0410582	0.0254923	0.0491834	0.0052416	0.1102	0.0788	1	0
ENSMUSG00000043432	Leng9	0.0411162	0.0281811	0.0637334	0.0136646	0.318	0.2664	1	0
ENSMUSG00000033713	Foxn3	0.04114	0.0455111	-0.0674578	0.0136627	0.1008	0.1394	1	0
ENSMUSG00000087177	E130307A14Rik	0.0412689	0.0312066	-0.0902944	0.0213036	0.3902	0.4386	1	0
ENSMUSG00000030007	Cct7	0.0412776	0.0345385	0.065545	0.015612	0.181	0.14	1	0
ENSMUSG00000056014	A430033K04Rik	0.0413073	0.0396174	-0.04148	0.0129804	0.072	0.1058	1	0
ENSMUSG00000038034	Igsf8	0.0415507	0.0633696	0.0916487	0.0155538	0.2624	0.2142	1	0
ENSMUSG00000025658	Cnksr2	0.0416539	0.0405427	-0.073014	0.0263174	0.9864	0.9918	1	0	SFARI					2	1
ENSMUSG00000025899	Alkbh8	0.0417698	0.034511	-0.0634701	0.0154062	0.2066	0.253	1	0
ENSMUSG00000013495	Tmem175	0.0417824	0.0493765	-0.0780311	0.0224301	0.248	0.2986	1	0
ENSMUSG00000041220	Elovl6	0.0418311	0.0568076	-0.0745791	0.0315004	0.194	0.2544	1	0
ENSMUSG00000113136	Gm19951	0.0419225	0.027899	0.0635875	0.00524232	0.1658	0.129	1	0
ENSMUSG00000028785	Hpca	0.0421757	0.0289807	0.103409	0.0152634	0.3746	0.3338	1	0
ENSMUSG00000052726	Kcnt2	0.0424266	0.0524738	-0.0732832	0.0252016	0.088	0.1236	1	0
ENSMUSG00000113608	Gm48715	0.0424587	0.0461958	0.0635649	0.0101064	0.1168	0.0834	1	0
ENSMUSG00000085222	Gm13974	0.0425447	0.0375366	-0.0902085	0.0220393	0.2952	0.3472	1	0
ENSMUSG00000031748	Gnao1	0.0426392	0.04003	-0.0933655	0.0205425	0.6384	0.7018	1	0
ENSMUSG00000039601	Rcan2	0.0428345	0.0437666	-0.0867947	0.0287214	0.7654	0.822	1	0
ENSMUSG00000032966	Fkbp1a	0.042847	0.0323824	0.0955021	0.0186548	0.3778	0.3328	1	0
ENSMUSG00000061755	Bod1l	0.042931	0.0564561	-0.0676841	0.0179311	0.236	0.2896	1	0
ENSMUSG00000060679	Mrps9	0.042944	0.031699	-0.0618565	0.0107538	0.2834	0.3346	1	0
ENSMUSG00000074088	Snrnp40	0.0429643	0.0507563	-0.041786	0.0068742	0.0906	0.126	1	0
ENSMUSG00000087475	4933406I18Rik	0.0429775	0.0224948	-0.0607316	0.0133435	0.225	0.2716	1	0
ENSMUSG00000042846	Lrrtm3	0.0431172	0.0195261	-0.0757545	0.00883027	0.9142	0.9446	1	0
ENSMUSG00000026869	Psmd5	0.0432155	0.0553699	-0.048969	0.0184626	0.0914	0.13	1	0
ENSMUSG00000026028	Trak2	0.0432335	0.0472938	-0.0619778	0.0194749	0.1404	0.184	1	0
ENSMUSG00000018501	Ncor1	0.0433193	0.0219461	-0.0607978	0.010262	0.6568	0.718	1	0	SFARI					2	0
ENSMUSG00000034175	Rhbdd3	0.0433353	0.0457196	0.0705144	0.0200638	0.1682	0.1274	1	0
ENSMUSG00000058835	Abi1	0.0435126	0.0594156	-0.0700813	0.018401	0.5182	0.5896	1	0
ENSMUSG00000049354	Dcaf7	0.043568	0.0385545	-0.0541485	0.0149546	0.1442	0.187	1	0
ENSMUSG00000063108	Zfp26	0.0436421	0.0188806	-0.0551827	0.00620955	0.1154	0.1508	1	0
ENSMUSG00000060176	Kif27	0.0436507	0.0593077	-0.053061	0.0165982	0.1138	0.1566	1	0
ENSMUSG00000041491	Cep78	0.0438578	0.0263476	-0.0494737	0.00677547	0.1334	0.1726	1	0
ENSMUSG00000003974	Grm3	0.0440052	0.0520293	-0.137237	0.0228099	0.7842	0.8166	1	0
ENSMUSG00000023845	Lnpep	0.0440518	0.0714987	-0.0751563	0.0182428	0.3692	0.4286	1	0
ENSMUSG00000020962	Gtf2a1	0.0441148	0.0569799	-0.0621477	0.0189196	0.1934	0.245	1	0
ENSMUSG00000023452	Pisd	0.0441595	0.0723457	0.0617299	0.0146363	0.1202	0.0828	1	0
ENSMUSG00000026771	Spopl	0.0442261	0.0609093	-0.0763136	0.0271812	0.2396	0.298	1	0
ENSMUSG00000038122	Tbc1d32	0.0442551	0.0460536	-0.0627392	0.0165069	0.2384	0.2886	1	0
ENSMUSG00000025326	Ube3a	0.0443167	0.0531597	-0.0693354	0.0119028	0.7912	0.8442	1	0	SFARI					1	1
ENSMUSG00000042216	Sgsm1	0.0444333	0.0611446	-0.0656366	0.0235706	0.2264	0.2792	1	0
ENSMUSG00000071454	Dtnb	0.0444749	0.0227664	-0.0793795	0.0186395	0.8718	0.8946	1	0
ENSMUSG00000019916	P4ha1	0.0449516	0.0375049	-0.075363	0.0223386	0.407	0.4702	1	0
ENSMUSG00000055917	Zfp277	0.0449794	0.0513016	-0.058878	0.0222262	0.2014	0.2472	1	0
ENSMUSG00000090841	Myl6	0.0450369	0.0153337	0.0630056	0.00568975	0.2228	0.1818	1	0
ENSMUSG00000032263	Bckdhb	0.0451358	0.0330784	-0.0681594	0.0307535	0.2328	0.2848	1	0
ENSMUSG00000027189	Trim44	0.0453223	0.0715914	-0.0817017	0.0320579	0.3282	0.3906	1	0
ENSMUSG00000071064	Zfp827	0.045346	0.0531435	-0.0681005	0.018196	0.3036	0.3554	1	0	SFARI					2	0
ENSMUSG00000026782	Abi2	0.0453854	0.05534	-0.0853318	0.0196552	0.7784	0.8158	1	0
ENSMUSG00000019210	Atp6v1e1	0.0454023	0.0673475	0.0877897	0.0243411	0.2436	0.1938	1	0
ENSMUSG00000037624	Kcnk2	0.045465	0.0429123	-0.106043	0.0376247	0.5146	0.5628	1	0
ENSMUSG00000064202	Spata6l	0.0455244	0.0384803	-0.0543888	0.0143663	0.0836	0.1174	1	0
ENSMUSG00000035632	Cnot3	0.0458346	0.0348681	0.0766691	0.016517	0.3668	0.3166	1	0	SFARI;EAGLE;TADA	0.00572418	Limited	5.6	Discordant	1	1
ENSMUSG00000030122	Ptms	0.0459733	0.0809343	0.0929459	0.0178564	0.2898	0.24	1	0
ENSMUSG00000093387	Gm20732	0.0459945	0.0564743	-0.0719135	0.0138335	0.1838	0.2304	1	0
ENSMUSG00000037111	Setd7	0.0459991	0.0279979	-0.0477745	0.0196789	0.1362	0.1796	1	0
ENSMUSG00000035305	Ror1	0.0460067	0.0229875	-0.113045	0.0153852	0.4496	0.5028	1	0
ENSMUSG00000020576	Nbas	0.0461476	0.0410553	-0.0727853	0.0230264	0.3268	0.3844	1	0
ENSMUSG00000037742	Eef1a1	0.046153	0.0521891	0.112163	0.0284166	0.413	0.3664	1	0
ENSMUSG00000024533	Spire1	0.0461535	0.0485649	-0.0586738	0.0218784	0.3296	0.3858	1	0
ENSMUSG00000042719	Naa25	0.0461886	0.0374867	0.0625001	0.00955141	0.161	0.1244	1	0
ENSMUSG00000046434	Hnrnpa1	0.0462777	0.0302088	0.0788496	0.00888996	0.2694	0.227	1	0
ENSMUSG00000025551	Fgf14	0.0464465	0.0278905	0.0467109	0.0042002	1	1	1	0	SFARI					3	0
ENSMUSG00000028328	Tmod1	0.0466346	0.0732473	-0.068983	0.0324296	0.2894	0.3536	1	0
ENSMUSG00000039210	Gpatch2	0.0466375	0.0373668	-0.0655006	0.022965	0.1992	0.2474	1	0
ENSMUSG00000037541	Shank2	0.0468653	0.071563	-0.0691583	0.0316303	0.3376	0.4016	1	0	SFARI;EAGLE;TADA	0.00016496	Definitive	18.55	Concordant	1	0
ENSMUSG00000032688	Malt1	0.0469556	0.031895	-0.0487741	0.0114334	0.0954	0.1298	1	0
ENSMUSG00000021840	Mapk1ip1l	0.0470233	0.0326514	-0.0508212	0.00913048	0.1402	0.1802	1	0
ENSMUSG00000028488	Sh3gl2	0.0471747	0.0359469	-0.0688162	0.0189713	0.402	0.4604	1	0
ENSMUSG00000045038	Prkce	0.0474385	0.0462933	-0.0890069	0.014787	0.9124	0.9394	1	0
ENSMUSG00000034312	Iqsec1	0.0475207	0.0617231	-0.0815243	0.0261531	0.5098	0.5738	1	0
ENSMUSG00000024286	Ccny	0.0477148	0.0326708	-0.0739749	0.0186646	0.4636	0.5172	1	0
ENSMUSG00000024639	Gnaq	0.0480218	0.0465479	-0.0850755	0.0268995	0.5464	0.6174	1	0
ENSMUSG00000040867	Begain	0.0480347	0.0542727	0.0722466	0.0133056	0.1928	0.151	1	0
ENSMUSG00000039068	Zzz3	0.0480353	0.0618244	-0.0715896	0.0142213	0.3158	0.3702	1	0
ENSMUSG00000044533	Rps2	0.048097	0.0599577	0.0890253	0.0348796	0.2476	0.1984	0.962442	0.0839824
ENSMUSG00000068015	Lrch1	0.048485	0.0510525	-0.0832565	0.0150578	0.2814	0.3312	1	0
ENSMUSG00000032468	Armc8	0.0488476	0.0560408	-0.0677018	0.0258866	0.3724	0.4366	1	0
ENSMUSG00000048874	Phf3	0.0488946	0.0318129	-0.0660954	0.0181081	0.3952	0.4542	1	0	SFARI;EAGLE;TADA	0.00626539	Moderate	9.75	Discordant	1	0
ENSMUSG00000025917	Cops5	0.0490531	0.0552456	-0.0709379	0.0226626	0.1712	0.2174	1	0
ENSMUSG00000027167	Elp4	0.0491464	0.0572542	-0.0871674	0.0250909	0.3338	0.3882	1	0	SFARI					2	0
ENSMUSG00000021124	Vti1b	0.0493709	0.0724098	-0.0740988	0.0218322	0.2854	0.339	1	0
ENSMUSG00000038546	Ranbp9	0.0496211	0.0303243	-0.0610105	0.0176714	0.424	0.4806	1	0
ENSMUSG00000034098	Fstl5	0.049629	0.066988	-0.0591159	0.019716	0.4608	0.5326	1	0
ENSMUSG00000032267	Usp28	0.0497929	0.0520026	-0.0551643	0.0288481	0.2644	0.3226	1	0
ENSMUSG00000023092	Fhl1	0.0498522	0.0675924	0.0907849	0.0152277	0.226	0.181	1	0
ENSMUSG00000033565	Rbfox2	0.0499481	0.0746703	-0.0854259	0.0180267	0.759	0.8	1	0

## Sheet: D2_MSN
ensembl	gene	p_val.mean	p_val.std	avg_log2FC.mean	avg_log2FC.std	pct.1.mean	pct.2.mean	padj.mean	padj.std	ASD.status	TADA.FDR	EAGLE.annotation	EAGLE.score	EAGLE.concordance	SFARI.score	SFARI.syndromic
ENSMUSG00000092341	Malat1	2.52294e-20	4.53935e-20	-0.215143	0.00742426	1	1	7.63996e-16	1.3746e-15
ENSMUSG00000045573	Penk	3.84541e-15	5.46343e-15	0.373154	0.00990655	0.9852	0.9754	1.16447e-10	1.65444e-10
ENSMUSG00000020719	Ddx5	6.42339e-14	1.43631e-13	0.31284	0.0298002	0.9946	0.9634	1.94513e-09	4.34944e-09
ENSMUSG00000019505	Ubb	8.61947e-14	1.9272e-13	0.444245	0.0318878	0.5374	0.3498	2.61015e-09	5.83594e-09
ENSMUSG00000001270	Ckb	9.52229e-14	9.44574e-14	0.476646	0.0230116	0.8476	0.7702	2.88354e-09	2.86036e-09
ENSMUSG00000022748	Cmss1	1.65696e-11	1.77173e-11	0.323446	0.0192003	0.842	0.7686	5.01761e-07	5.36515e-07
ENSMUSG00000008658	Rbfox1	4.91623e-11	1.09909e-10	-0.186042	0.0187098	1	1	1.48873e-06	3.32828e-06	SFARI					2	0
ENSMUSG00000015656	Hspa8	6.81293e-11	1.11212e-10	0.342472	0.0224588	0.5128	0.3702	2.06309e-06	3.36771e-06
ENSMUSG00000002459	Rgs20	3.39622e-10	6.049e-10	-0.302999	0.0103368	0.6894	0.8138	1.02844e-05	1.83176e-05
ENSMUSG00000021448	Shc3	3.8712e-10	8.08874e-10	-0.234774	0.0214028	0.3178	0.495	1.17228e-05	2.44943e-05
ENSMUSG00000036564	Ndrg4	1.09607e-09	1.80131e-09	0.290921	0.0187098	0.7764	0.686	3.31912e-05	5.45471e-05
ENSMUSG00000038128	Camk4	1.34359e-09	2.68677e-09	-0.231829	0.0159487	0.9234	0.9586	4.06867e-05	8.13606e-05	SFARI					2	0
ENSMUSG00000021268	Meg3	8.22645e-09	1.80564e-08	0.15903	0.00751643	0.9994	1	0.000249113	0.000546785
ENSMUSG00000032936	Camkv	1.43079e-08	2.12274e-08	0.290454	0.0217931	0.8086	0.7768	0.000433273	0.000642809
ENSMUSG00000033307	Mif	6.14068e-08	1.11799e-07	0.200964	0.0272566	0.223	0.1084	0.00185952	0.00338551
ENSMUSG00000060924	Csmd1	7.52295e-08	1.33536e-07	-0.149912	0.0169646	0.9992	1	0.0022781	0.00404373	SFARI					2	0
ENSMUSG00000063511	Snrnp70	1.66576e-07	3.44623e-07	0.230951	0.0290545	0.8498	0.7914	0.00504426	0.0104359
ENSMUSG00000035885	Cox8a	2.30134e-07	3.37212e-07	0.274829	0.021542	0.366	0.2458	0.00696892	0.0102114
ENSMUSG00000041216	Clvs1	2.69415e-07	6.01862e-07	-0.290999	0.0342448	0.7224	0.8242	0.00815842	0.0182256
ENSMUSG00000057329	Bcl2	3.89858e-07	5.81665e-07	-0.229684	0.0165128	0.2878	0.4088	0.0118057	0.017614
ENSMUSG00000097545	Mir124a-1hg	4.7664e-07	7.31771e-07	0.251747	0.0193915	0.7022	0.6156	0.0144336	0.0221595
ENSMUSG00000053465	Hs6st3	4.79781e-07	5.93107e-07	-0.257125	0.0227889	0.9372	0.9674	0.0145287	0.0179605
ENSMUSG00000022199	Slc22a17	5.24466e-07	6.62148e-07	0.258387	0.0105199	0.6036	0.5082	0.0158819	0.0200512
ENSMUSG00000057378	Ryr3	9.97202e-07	1.59927e-06	-0.165735	0.0216752	0.9968	0.994	0.0301973	0.048429
ENSMUSG00000021318	Gli3	1.1278e-06	9.87009e-07	-0.227098	0.0118415	0.3348	0.4502	0.0341519	0.0298886
ENSMUSG00000046159	Chrm3	1.14222e-06	8.82777e-07	-0.197884	0.0313714	0.5196	0.653	0.0345888	0.0267323	SFARI					2	0
ENSMUSG00000057666	Gapdh	1.27812e-06	1.47709e-06	0.268401	0.0261264	0.4942	0.3854	0.038704	0.0447291
ENSMUSG00000030695	Aldoa	1.62566e-06	3.61589e-06	0.290264	0.0352756	0.4688	0.339	0.0492283	0.109496
ENSMUSG00000024121	Atp6v0c	2.69786e-06	3.59086e-06	0.254842	0.0344931	0.5316	0.426	0.0816965	0.108738
ENSMUSG00000098973	Mir6236	5.14657e-06	6.54034e-06	0.299688	0.0280002	0.859	0.8088	0.155848	0.198054
ENSMUSG00000097391	Mirg	5.50308e-06	1.12007e-05	0.242149	0.0252524	0.6934	0.6142	0.166644	0.339181
ENSMUSG00000021910	Nisch	5.53464e-06	1.16148e-05	0.236198	0.0212389	0.5962	0.496	0.1676	0.351718
ENSMUSG00000034892	Rps29	6.36857e-06	6.25918e-06	0.170803	0.00843113	0.27	0.1754	0.192853	0.18954
ENSMUSG00000055409	Nell1	1.01089e-05	1.96365e-05	-0.208238	0.0307259	0.5382	0.6654	0.232938	0.431828
ENSMUSG00000026204	Ptprn	1.07763e-05	2.31386e-05	0.251998	0.0284713	0.7948	0.742	0.210414	0.441557
ENSMUSG00000022564	Grina	1.22439e-05	2.34515e-05	0.208034	0.0233476	0.45	0.348	0.243299	0.426546
ENSMUSG00000055214	Pld5	1.28155e-05	1.45277e-05	-0.199303	0.0142637	0.3114	0.4188	0.365101	0.392969
ENSMUSG00000044667	Plppr4	1.30845e-05	1.7269e-05	0.197634	0.00974278	0.818	0.777	0.335425	0.392392
ENSMUSG00000026223	Itm2c	1.4038e-05	1.54535e-05	0.185685	0.0240123	0.4956	0.3928	0.3911	0.401818
ENSMUSG00000007783	Cpt1c	1.5784e-05	2.27346e-05	0.207319	0.0208473	0.6182	0.5328	0.352893	0.439765
ENSMUSG00000046922	Gpr6	1.73774e-05	1.17736e-05	0.197323	0.014092	0.4632	0.3638	0.526222	0.356528
ENSMUSG00000072235	Tuba1a	1.75256e-05	2.70592e-05	0.183688	0.0111371	0.249	0.16	0.335836	0.397465
ENSMUSG00000020121	Srgap1	1.97173e-05	2.84657e-05	-0.214094	0.0292792	0.6732	0.7542	0.394191	0.479525
ENSMUSG00000021719	Rgs7bp	2.11636e-05	4.57975e-05	-0.201662	0.0262916	0.7826	0.876	0.216582	0.438406
ENSMUSG00000061518	Cox5b	2.27419e-05	4.24379e-05	0.175812	0.0170874	0.2686	0.174	0.292283	0.405651
ENSMUSG00000032985	5730522E02Rik	2.47755e-05	3.58661e-05	-0.183808	0.0198686	0.8814	0.9148	0.429133	0.453584
ENSMUSG00000031673	Cdh11	2.83912e-05	5.1699e-05	-0.231735	0.0225721	0.5524	0.6466	0.334402	0.443706	SFARI					2	0
ENSMUSG00000101609	Kcnq1ot1	3.02785e-05	3.17684e-05	-0.190872	0.0294141	0.3574	0.463	0.549412	0.506458
ENSMUSG00000023944	Hsp90ab1	3.08833e-05	6.46969e-05	0.260722	0.0436902	0.5986	0.501	0.247438	0.423289
ENSMUSG00000020160	Meis1	3.19055e-05	4.21962e-05	-0.169569	0.0141401	0.2078	0.3032	0.527707	0.392212
ENSMUSG00000027674	Pex5l	3.25575e-05	5.61476e-05	-0.168262	0.0331664	0.1724	0.2702	0.385293	0.405217
ENSMUSG00000054976	Nyap2	3.37067e-05	3.99177e-05	-0.240127	0.0192832	0.545	0.659	0.50584	0.464885
ENSMUSG00000024238	Zeb1	3.38792e-05	4.33532e-05	-0.20461	0.0303648	0.825	0.887	0.442132	0.51414
ENSMUSG00000032020	Ubash3b	3.72955e-05	5.2316e-05	-0.146392	0.020778	0.113	0.195	0.468009	0.496898
ENSMUSG00000037624	Kcnk2	3.79681e-05	2.16617e-05	-0.213812	0.0190889	0.744	0.804	0.813078	0.41797
ENSMUSG00000051177	Plcb1	4.04977e-05	4.72131e-05	-0.128991	0.0148544	0.9982	0.9992	0.528223	0.4565	SFARI					2	0
ENSMUSG00000026576	Atp1b1	4.08057e-05	4.79905e-05	0.210449	0.0287755	0.7192	0.656	0.599248	0.542703
ENSMUSG00000027419	Pcsk2	4.15968e-05	4.4895e-05	0.144374	0.0102604	0.9852	0.988	0.669992	0.454972
ENSMUSG00000062825	Actg1	4.50491e-05	6.68736e-05	0.183107	0.015048	0.3696	0.2754	0.537733	0.449265
ENSMUSG00000028833	Ncdn	4.60012e-05	8.69004e-05	0.173701	0.0148983	0.3572	0.256	0.380293	0.477461
ENSMUSG00000026610	Esrrg	4.82071e-05	3.18935e-05	-0.207204	0.0213739	0.5482	0.6332	0.801562	0.44372
ENSMUSG00000038418	Egr1	5.18796e-05	0.000106498	0.20974	0.0443358	0.3252	0.2228	0.30408	0.412999
ENSMUSG00000055839	Elob	5.22579e-05	6.03675e-05	0.149411	0.0126897	0.2312	0.1506	0.634841	0.358638
ENSMUSG00000033161	Atp1a1	5.24814e-05	0.0001036	0.188258	0.0234245	0.4172	0.319	0.349591	0.37772	SFARI					2	1
ENSMUSG00000079157	Nalf1	5.46834e-05	7.44011e-05	-0.234336	0.0429555	0.6412	0.7308	0.432812	0.519311
ENSMUSG00000034135	Sik3	5.61599e-05	0.000101285	-0.210814	0.0257397	0.8122	0.8696	0.469705	0.485702
ENSMUSG00000049422	Chchd10	5.7924e-05	0.000107239	0.232734	0.0263887	0.3178	0.2216	0.446462	0.43277
ENSMUSG00000059921	Unc5c	7.25988e-05	0.000126042	-0.245056	0.0366247	0.6052	0.6898	0.600597	0.4551
ENSMUSG00000020163	Uqcr11	7.61121e-05	0.000112335	0.114804	0.015318	0.1682	0.095	0.631648	0.506026
ENSMUSG00000026657	Frmd4a	7.90236e-05	0.000114989	-0.194759	0.0272608	0.6456	0.723	0.604953	0.540962
ENSMUSG00000078970	Dnaaf10	8.1347e-05	0.00015338	-0.0975811	0.0127165	0.0702	0.1386	0.457961	0.496497
ENSMUSG00000036273	Lrrk2	8.13833e-05	9.36962e-05	-0.214065	0.0164897	0.7704	0.8338	0.803886	0.438525
ENSMUSG00000033981	Gria2	8.20735e-05	0.000145728	0.121079	0.0185016	0.9992	0.9994	0.410399	0.538259	SFARI;EAGLE;TADA	0.0666362	Definitive	12	Concordant	1	0
ENSMUSG00000045441	Gprin3	8.692e-05	0.00010248	-0.218006	0.0331218	0.6436	0.7288	0.663782	0.402398
ENSMUSG00000058589	Anks1b	8.86987e-05	0.000132051	-0.138533	0.0240174	0.9992	1	0.447886	0.512899	SFARI					2	1
ENSMUSG00000033510	Otud7a	8.89223e-05	0.000143629	-0.182631	0.0342808	0.618	0.7178	0.431318	0.520314	SFARI					2	0
ENSMUSG00000054728	Phactr1	8.97739e-05	0.000167013	-0.0963535	0.0190728	1	1	0.531243	0.449968
ENSMUSG00000028229	Rmdn1	9.05311e-05	7.12461e-05	-0.143633	0.0211586	0.3948	0.4942	0.784336	0.416228
ENSMUSG00000039218	Srrm2	9.80748e-05	0.000122881	0.158109	0.0136443	0.8562	0.8202	0.720222	0.32469	SFARI					2	1
ENSMUSG00000027827	Kcnab1	0.000100276	0.000140465	-0.15876	0.0136747	0.9804	0.9906	0.656121	0.408616
ENSMUSG00000078919	Dpm1	0.0001021	9.96842e-05	-0.105162	0.00560624	0.156	0.239	0.855126	0.323948
ENSMUSG00000040640	Erc2	0.000105223	0.000193491	-0.142351	0.0245384	0.9954	0.9954	0.526674	0.493229
ENSMUSG00000037138	Aff3	0.000106948	0.000119144	-0.172783	0.0206462	0.8256	0.8828	0.702956	0.414306
ENSMUSG00000020018	Snrpf	0.000107331	9.68283e-05	0.0932199	0.00710586	0.1128	0.056	0.776846	0.339579
ENSMUSG00000085944	1700003D09Rik	0.000114569	0.000144711	-0.104797	0.011173	0.1094	0.1834	0.701197	0.413841
ENSMUSG00000032238	Rora	0.000115685	0.000200248	-0.126841	0.0105883	0.993	0.9958	0.75618	0.270493	SFARI						1
ENSMUSG00000019996	Map7	0.000120931	0.000132912	-0.16975	0.0193432	0.4192	0.5158	0.663592	0.469193
ENSMUSG00000024530	Prelid3a	0.000123307	0.000203281	-0.119977	0.0209648	0.201	0.2944	0.548601	0.454358
ENSMUSG00000025571	Tnrc6c	0.000123577	0.000150567	-0.167705	0.00936874	0.6704	0.7618	0.99333	0.0149135	SFARI					2	0
ENSMUSG00000068923	Syt11	0.000126337	7.00732e-05	0.208734	0.0151991	0.5564	0.486	0.992613	0.0165174
ENSMUSG00000055835	Zfp1	0.000140121	0.000215946	-0.117029	0.0173186	0.1388	0.2208	0.645844	0.490019
ENSMUSG00000033565	Rbfox2	0.000140716	0.000268622	-0.163598	0.0313122	0.7406	0.8276	0.623513	0.51679
ENSMUSG00000040118	Cacna2d1	0.00016866	0.000184919	-0.151434	0.0214255	0.8412	0.8938	0.63325	0.502345	SFARI					2	0
ENSMUSG00000057914	Cacnb2	0.000173771	0.000139114	-0.145445	0.0188142	0.9954	0.9986	0.821485	0.399171	SFARI					2	0
ENSMUSG00000038518	Jarid2	0.00018713	0.00025681	-0.223149	0.0224797	0.7168	0.7806	0.528744	0.479167	SFARI					2	0
ENSMUSG00000029657	Hsph1	0.000202536	0.000179544	0.152268	0.00953758	0.3422	0.2608	1	0
ENSMUSG00000041697	Cox6a1	0.000208514	0.000434498	0.222346	0.0249616	0.3464	0.2542	0.475338	0.481144
ENSMUSG00000029223	Uchl1	0.000210032	0.00015896	0.143439	0.0125529	0.3184	0.2384	1	0
ENSMUSG00000046364	Rpl27a	0.000236159	0.000181219	0.102	0.00907219	0.1472	0.086	0.925296	0.167043
ENSMUSG00000029632	Ndufa4	0.000237463	0.000311706	0.168111	0.017265	0.2818	0.203	0.847189	0.340604
ENSMUSG00000030854	Ptpn5	0.000243502	0.000158067	0.161094	0.0126734	0.8384	0.8252	1	0
ENSMUSG00000019039	Dalrd3	0.000250753	0.000246711	0.198296	0.0224194	0.5716	0.5036	0.83171	0.376307
ENSMUSG00000098274	Rpl24	0.00025218	0.000199153	0.0924445	0.00777251	0.1496	0.0886	1	0
ENSMUSG00000002688	Prkd1	0.000273095	0.000264508	-0.157882	0.0219544	0.6758	0.7614	1	0	SFARI						1
ENSMUSG00000042846	Lrrtm3	0.000273329	0.000477364	-0.171244	0.0125372	0.889	0.9252	0.80155	0.289881
ENSMUSG00000113694	Gm48747	0.000290981	0.000260402	-0.0998317	0.0254559	0.17	0.255	0.802449	0.441738
ENSMUSG00000037771	Slc32a1	0.000294354	0.00016122	0.140442	0.00562349	0.273	0.197	1	0
ENSMUSG00000016319	Slc25a5	0.000296671	0.00024136	0.158135	0.010432	0.261	0.1866	0.840199	0.357325
ENSMUSG00000061904	Slc25a3	0.000309472	0.000342098	0.197312	0.0214093	0.6326	0.5624	0.807519	0.4304
ENSMUSG00000097736	9530059O14Rik	0.000319074	0.000341429	-0.172634	0.0286161	0.8442	0.887	0.74852	0.415009
ENSMUSG00000039197	Adk	0.00035894	0.000293969	-0.230956	0.0252005	0.5514	0.6344	1	0	SFARI					2	0
ENSMUSG00000039001	Rps21	0.000374625	0.000324375	0.118081	0.00545099	0.228	0.1532	0.861129	0.310525
ENSMUSG00000021068	Nin	0.000389434	0.000708937	-0.137001	0.0220543	0.6104	0.7022	0.673538	0.448655
ENSMUSG00000022108	Itm2b	0.00043133	0.000547846	0.160211	0.0152653	0.458	0.3764	1	0
ENSMUSG00000028274	Rngtt	0.000468274	0.000520122	-0.132106	0.0218815	0.3852	0.484	0.905571	0.211149
ENSMUSG00000059003	Grin2a	0.000475136	0.000536342	-0.143946	0.0279486	0.8854	0.9146	0.813066	0.417997	SFARI;EAGLE		Limited	3.6	Discordant	1	0
ENSMUSG00000106515	Gm30382	0.000482561	0.000572471	-0.105068	0.0140696	0.1764	0.2534	1	0
ENSMUSG00000006651	Aplp1	0.00052407	0.000299532	0.155073	0.0175383	0.5222	0.438	1	0
ENSMUSG00000028496	Mllt3	0.000529418	0.000599615	-0.169947	0.0158505	0.7196	0.7742	0.792299	0.310067
ENSMUSG00000029655	N4bp2l2	0.000536201	0.000464598	-0.110594	0.0114512	0.4092	0.5106	1	0
ENSMUSG00000026575	Nme7	0.000543901	0.000517953	0.13311	0.0263172	0.415	0.3242	0.806845	0.431908
ENSMUSG00000054423	Cadps	0.000544332	0.000845002	-0.16493	0.0193329	0.6274	0.7018	1	0	SFARI					2	0
ENSMUSG00000026384	Ptpn4	0.000564545	0.000319797	-0.13877	0.0195886	0.4628	0.5488	1	0	SFARI						1
ENSMUSG00000021700	Rab3c	0.000568479	0.000460678	-0.163921	0.0199142	0.4434	0.5274	0.9613	0.0865364
ENSMUSG00000031708	Tecr	0.000579504	0.000934045	0.174571	0.0316678	0.3794	0.2966	0.633794	0.504088
ENSMUSG00000110824	Gm48677	0.00060116	0.000399622	-0.0813415	0.00610557	0.2904	0.3794	1	0
ENSMUSG00000019820	Utrn	0.000627963	0.000617663	-0.166777	0.0176979	0.6858	0.7688	0.966265	0.0754341
ENSMUSG00000030621	Me3	0.000639893	0.00115523	-0.145433	0.0215053	0.6414	0.7214	1	0
ENSMUSG00000000605	Clcn4	0.000644404	0.000614588	0.115432	0.0151602	0.2034	0.135	0.835517	0.367795	SFARI					2	1
ENSMUSG00000030432	Rpl28	0.00065455	0.00105978	0.128607	0.0158489	0.1948	0.1292	1	0
ENSMUSG00000095253	Zfp799	0.000665957	0.000526597	-0.111044	0.0258757	0.1862	0.2642	0.801599	0.443638
ENSMUSG00000034780	B3galt1	0.000666505	0.00042635	-0.0978444	0.0117885	0.9424	0.9624	0.948881	0.114304
ENSMUSG00000035964	Tmem59l	0.000677115	0.000550389	0.0846775	0.00692242	0.169	0.1064	0.958236	0.093388
ENSMUSG00000046709	Mapk10	0.000678975	0.000843962	-0.150015	0.0137875	0.7842	0.8428	1	0
ENSMUSG00000039145	Camk1d	0.000689132	0.00102304	0.174944	0.0199948	0.9366	0.9284	0.893062	0.239122
ENSMUSG00000079036	Alkbh1	0.000693052	0.00129924	-0.0909773	0.0122845	0.1226	0.1944	1	0
ENSMUSG00000004267	Eno2	0.000718905	0.00098318	0.140366	0.0196718	0.4136	0.3326	1	0
ENSMUSG00000028184	Adgrl2	0.000816488	0.00129921	-0.157686	0.0219419	0.5008	0.591	1	0
ENSMUSG00000041846	Ppp4r3a	0.000820591	0.00101684	-0.0991182	0.0115601	0.261	0.3456	1	0
ENSMUSG00000027210	Meis2	0.000820614	0.000795627	-0.107833	0.00877107	0.9842	0.9884	1	0	SFARI;EAGLE;TADA	0.00517313	Moderate	7.5	Discordant	1	1
ENSMUSG00000064115	Cadm2	0.000827659	0.00134518	-0.108645	0.0175437	1	1	0.828687	0.383066	SFARI					2	0
ENSMUSG00000012405	Rpl15	0.000842586	0.000903981	0.0824763	0.00823047	0.1258	0.0732	1	0
ENSMUSG00000040282	Cdin1	0.000865957	0.000946725	-0.122688	0.0133807	0.29	0.372	1	0
ENSMUSG00000035530	Eif1	0.000874633	0.00184955	0.213714	0.0355065	0.4102	0.3346	0.708294	0.442408
ENSMUSG00000047747	Rnf150	0.000883799	0.000519585	-0.127407	0.0168489	0.7874	0.84	1	0
ENSMUSG00000022553	Maf1	0.000928311	0.000886981	0.0637976	0.00906413	0.109	0.0594	1	0
ENSMUSG00000024830	Rps6kb2	0.000929676	0.00175852	0.145167	0.020734	0.3126	0.231	0.840895	0.355769
ENSMUSG00000032547	Ryk	0.000977645	0.00105647	-0.0952155	0.0176165	0.1674	0.242	0.938781	0.13689
ENSMUSG00000025290	Rps24	0.000992908	0.000705614	0.090362	0.0118884	0.1512	0.0944	1	0
ENSMUSG00000032330	Cox7a2	0.000998284	0.00137849	0.14687	0.0170844	0.2082	0.1422	0.908325	0.204992
ENSMUSG00000071528	Atp5md	0.00100857	0.0012927	0.138862	0.0170004	0.255	0.1826	0.809779	0.425348
ENSMUSG00000055254	Ntrk2	0.00103393	0.00131834	-0.222157	0.0166778	0.7724	0.8066	1	0	SFARI						1
ENSMUSG00000032939	Nup93	0.00106289	0.00112903	-0.130905	0.0205458	0.5018	0.5914	0.815804	0.411875
ENSMUSG00000051331	Cacna1c	0.00106427	0.00153635	-0.145381	0.0271257	0.9248	0.9604	0.897279	0.229692	SFARI					1	1
ENSMUSG00000019806	Aig1	0.00106911	0.00148375	-0.152408	0.0229628	0.3278	0.4138	0.847323	0.341396
ENSMUSG00000024544	Ldlrad4	0.00109105	0.00172748	-0.172813	0.022621	0.739	0.8142	0.904293	0.214008
ENSMUSG00000026885	Ttll11	0.0011003	0.00206473	-0.129035	0.0164443	0.3904	0.4862	1	0
ENSMUSG00000026620	Mark1	0.00110535	0.00108597	-0.121594	0.019468	0.5544	0.6364	1	0	SFARI					2	0
ENSMUSG00000029817	Tra2a	0.001127	0.000882569	-0.106848	0.0107489	0.445	0.5474	1	0
ENSMUSG00000020321	Mdh1	0.00113524	0.000870572	0.142233	0.015251	0.445	0.369	1	0
ENSMUSG00000047284	Neurl4	0.00115167	0.000554831	0.0783335	0.00471559	0.1124	0.065	1	0
ENSMUSG00000029580	Actb	0.00115968	0.00219436	0.202475	0.0244366	0.5758	0.4984	0.881286	0.265453	SFARI;EAGLE		Limited	1	Discordant	1	1
ENSMUSG00000030120	Mlf2	0.00116799	0.00150822	0.136876	0.0191601	0.2728	0.1996	1	0
ENSMUSG00000028149	Rap1gds1	0.00120469	0.0023267	-0.131114	0.0255488	0.4768	0.5812	0.944203	0.124765
ENSMUSG00000042675	Ypel3	0.00123566	0.00169234	0.101344	0.00927815	0.1764	0.1154	1	0
ENSMUSG00000045128	Rpl18a	0.00124246	0.00101199	0.100327	0.00809655	0.15	0.0956	1	0
ENSMUSG00000025151	Maged1	0.00124569	0.00119053	0.155808	0.0287279	0.3876	0.312	0.899702	0.224274
ENSMUSG00000060487	Samd5	0.00125583	0.00205645	-0.145867	0.0325742	0.366	0.4586	0.69075	0.434119
ENSMUSG00000034265	Zdhhc14	0.00126274	0.00205418	-0.176361	0.0269596	0.8038	0.8434	0.859399	0.314393
ENSMUSG00000031425	Plp1	0.00129029	0.0020476	-0.322144	0.0778946	0.0692	0.1244	0.724237	0.429135
ENSMUSG00000025006	Sorbs1	0.00130243	0.00180252	-0.161754	0.0291901	0.8326	0.8812	0.985232	0.0330212
ENSMUSG00000000632	Sez6	0.00131027	0.00162343	0.186434	0.0185869	0.7034	0.6606	0.985035	0.0334633
ENSMUSG00000029651	Mtus2	0.00131504	0.00149928	-0.149274	0.0125776	0.4222	0.4988	1	0
ENSMUSG00000071866	Ppia	0.0013273	0.00181818	0.177669	0.0271013	0.3632	0.2856	0.846238	0.343822
ENSMUSG00000066189	Cacng3	0.00134238	0.00188299	-0.142969	0.0282022	0.5602	0.6524	0.805986	0.433828
ENSMUSG00000022389	Tef	0.00134534	0.000887549	-0.118793	0.0220712	0.285	0.3648	0.881247	0.265539
ENSMUSG00000090071	Cdk5r2	0.00135321	0.00183693	0.0712798	0.0116527	0.1136	0.0634	1	0
ENSMUSG00000021270	Hsp90aa1	0.00135909	0.00120611	0.17181	0.026051	0.3794	0.3112	0.979167	0.0465841
ENSMUSG00000017740	Slc12a5	0.00137054	0.000912514	0.156453	0.0130074	0.4664	0.3966	1	0	SFARI					2	0
ENSMUSG00000118401	Gpr52	0.00142217	0.00303847	-0.110814	0.0171275	0.125	0.1944	0.855925	0.32216
ENSMUSG00000022602	Arc	0.00143266	0.00127234	0.161301	0.0251473	0.1934	0.1312	0.878926	0.27073
ENSMUSG00000052374	Actn2	0.00146304	0.00123101	-0.120731	0.00985426	0.5862	0.6648	1	0
ENSMUSG00000049122	Frmd3	0.00146922	0.00205098	-0.0906973	0.0275005	0.1126	0.1794	0.803091	0.440302
ENSMUSG00000093674	Rpl41	0.00147206	0.000974536	0.112922	0.0135174	0.3886	0.3128	1	0
ENSMUSG00000007892	Rplp1	0.00148267	0.00209648	0.176106	0.0162415	0.3458	0.2742	0.881203	0.265639
ENSMUSG00000064138	Fam172a	0.00148398	0.00155305	-0.113651	0.0185271	0.5106	0.5984	1	0
ENSMUSG00000090223	Pcp4	0.00152836	0.00158272	0.205374	0.0133583	0.4528	0.3946	1	0
ENSMUSG00000036298	Slc2a13	0.00153385	0.00218569	-0.16746	0.0316357	0.8338	0.89	1	0
ENSMUSG00000035189	Ano4	0.0015568	0.00345042	-0.106637	0.0401082	0.0824	0.1522	0.52769	0.471264
ENSMUSG00000031841	Cdh13	0.00157764	0.00319535	-0.20986	0.0359474	0.3248	0.4122	0.665812	0.46707	SFARI					2	0
ENSMUSG00000015501	Hivep2	0.00158598	0.00210492	-0.153607	0.0248926	0.959	0.961	0.853066	0.20845	SFARI					1	1
ENSMUSG00000004207	Psap	0.00160228	0.00163176	0.148369	0.0228872	0.4004	0.3286	1	0
ENSMUSG00000039954	Stk32a	0.00163002	0.00131201	-0.148031	0.0200469	0.454	0.5278	1	0
ENSMUSG00000057897	Camk2b	0.00163893	0.00176442	0.133901	0.0258484	0.8628	0.845	1	0	SFARI						1
ENSMUSG00000054843	Atrnl1	0.00165349	0.00187818	-0.13302	0.02029	0.6888	0.7646	1	0
ENSMUSG00000032076	Cadm1	0.0016644	0.00179539	0.19652	0.0258433	0.7048	0.6366	1	0	SFARI					2	0
ENSMUSG00000006262	Mob1b	0.00170743	0.00132583	-0.0976518	0.00853612	0.1236	0.1816	1	0
ENSMUSG00000037996	Slc24a2	0.00178157	0.0024324	-0.153104	0.0256593	0.9078	0.9224	0.850376	0.33457	SFARI					2	0
ENSMUSG00000005705	Agrp	0.00181488	0.00322566	0.123774	0.0186423	0.2368	0.1656	1	0
ENSMUSG00000002102	Psmc3	0.00181829	0.00190245	0.0904895	0.0117737	0.1662	0.1086	1	0
ENSMUSG00000017491	Rarb	0.00184431	0.00301946	-0.129216	0.0290982	0.9498	0.9758	0.644045	0.489522
ENSMUSG00000028137	Celf3	0.00185229	0.0025963	0.110647	0.0116932	0.368	0.2902	1	0
ENSMUSG00000022577	Ly6h	0.00185821	0.00278721	0.152834	0.0208089	0.3458	0.2712	1	0
ENSMUSG00000035202	Lars2	0.00187105	0.00360274	0.180325	0.0204101	0.5354	0.4762	1	0
ENSMUSG00000002107	Celf2	0.00188253	0.00387575	-0.0708485	0.0111082	1	1	0.91464	0.19087	SFARI					2	1
ENSMUSG00000101621	Gm28905	0.00189075	0.00184351	-0.148184	0.0157436	0.6584	0.742	1	0
ENSMUSG00000040907	Atp1a3	0.00189623	0.00354041	0.168216	0.0253303	0.539	0.4702	1	0	SFARI					2	1
ENSMUSG00000005871	Apc	0.00195641	0.00426136	-0.152517	0.0311268	0.593	0.6888	0.794456	0.387271
ENSMUSG00000079564	Gm11149	0.00197208	0.00271845	-0.0831798	0.0134285	0.0992	0.1596	0.825234	0.390789
ENSMUSG00000037876	Jmjd1c	0.00199579	0.00283743	-0.135367	0.0221568	0.6512	0.7262	1	0	SFARI					2	0
ENSMUSG00000013236	Ptprs	0.00211088	0.00174909	0.141174	0.0084901	0.5054	0.4386	1	0
ENSMUSG00000019990	Pde7b	0.00212349	0.00229682	-0.130516	0.0171222	0.9794	0.9922	1	0
ENSMUSG00000098243	Gm4258	0.00215535	0.00318758	-0.127266	0.0180742	0.217	0.2898	1	0
ENSMUSG00000025019	Lcor	0.00216876	0.00240988	-0.127939	0.0233573	0.4904	0.578	0.847117	0.341857
ENSMUSG00000030590	Fam98c	0.00217959	0.00274104	0.0720599	0.0122001	0.136	0.0812	1	0	SFARI					2	0
ENSMUSG00000020173	Cobl	0.00218893	0.00230865	-0.15373	0.0177406	0.5364	0.6116	1	0
ENSMUSG00000019699	Akt3	0.00221069	0.00471486	-0.139228	0.0302597	0.8726	0.9104	0.733104	0.365721
ENSMUSG00000096929	A330023F24Rik	0.00225931	0.00310535	0.155567	0.0313493	0.74	0.699	0.902135	0.218833
ENSMUSG00000031748	Gnao1	0.00227314	0.00280909	-0.137026	0.0211569	0.6758	0.763	1	0
ENSMUSG00000034156	Tspoap1	0.00231415	0.00309347	0.161041	0.027303	0.525	0.4612	1	0	SFARI					2	0
ENSMUSG00000053626	Tll1	0.00239684	0.00263263	-0.108364	0.00566653	0.112	0.1682	1	0
ENSMUSG00000041624	Gucy1a2	0.00239919	0.00316947	-0.133191	0.0251805	0.6722	0.7636	1	0	SFARI					2	0
ENSMUSG00000031971	Ccsap	0.00242868	0.00486398	-0.0916187	0.0196036	0.168	0.242	1	0
ENSMUSG00000040594	Ranbp17	0.00243351	0.00463748	-0.127085	0.0268084	0.3234	0.4086	1	0	SFARI					2	0
ENSMUSG00000069769	Msi2	0.00259261	0.00241972	-0.107859	0.0249906	0.2676	0.3446	1	0
ENSMUSG00000038170	Pde4dip	0.00259874	0.00273894	-0.12811	0.0241573	0.7008	0.7716	1	0
ENSMUSG00000058740	Kcnt1	0.00260778	0.00331234	0.167075	0.0159028	0.6722	0.6352	1	0
ENSMUSG00000097342	Gm26618	0.00265866	0.00466891	-0.0899709	0.0121665	0.0618	0.1084	1	0
ENSMUSG00000018171	Vmp1	0.00270992	0.00274912	-0.136319	0.0195337	0.4152	0.4896	1	0
ENSMUSG00000024548	Setbp1	0.00274705	0.00361569	-0.124401	0.0217853	0.452	0.5476	1	0	SFARI					1	0
ENSMUSG00000040415	Dtx3	0.00277954	0.00230725	0.136899	0.0268683	0.4508	0.3746	0.817435	0.408229
ENSMUSG00000022790	Igsf11	0.00283626	0.00162213	-0.0889491	0.00860776	0.4732	0.5616	1	0
ENSMUSG00000033278	Ptprm	0.00290675	0.00397923	-0.148286	0.0181559	0.6138	0.6854	1	0
ENSMUSG00000036478	Btg1	0.0029638	0.00300321	0.087765	0.0179008	0.1302	0.0778	0.902812	0.15163
ENSMUSG00000010086	Rnf112	0.00305231	0.00454535	0.16516	0.019478	0.5442	0.4928	1	0
ENSMUSG00000032480	Dhx30	0.00310236	0.00416398	-0.101938	0.01203	0.2806	0.3612	1	0	SFARI						1
ENSMUSG00000033577	Myo6	0.00310377	0.00409585	-0.0691477	0.0127071	0.063	0.1084	1	0
ENSMUSG00000022186	Oxct1	0.00310877	0.00314703	-0.136949	0.0125022	0.5214	0.5894	1	0
ENSMUSG00000030096	Slc6a6	0.00313223	0.00347647	-0.105474	0.0282573	0.5014	0.5898	1	0
ENSMUSG00000042590	Ipo11	0.00319597	0.00310071	-0.112723	0.0161162	0.314	0.3832	1	0
ENSMUSG00000040896	Kcnd3	0.00321558	0.00324215	-0.0899357	0.0191176	0.225	0.2978	1	0	SFARI					2	0
ENSMUSG00000033216	Eefsec	0.0032824	0.00356004	-0.107326	0.0127488	0.235	0.3028	1	0
ENSMUSG00000034557	Zfyve9	0.00329823	0.00423594	-0.115312	0.0281145	0.4576	0.539	1	0
ENSMUSG00000014313	Cox6c	0.00330664	0.0046324	0.163496	0.028507	0.3296	0.2608	0.823429	0.394826
ENSMUSG00000020627	Klhl29	0.00330925	0.00591888	-0.122295	0.0268062	0.772	0.8224	1	0
ENSMUSG00000029757	Dync1i1	0.00331414	0.00321663	-0.118693	0.0195836	0.348	0.4256	1	0
ENSMUSG00000016427	Ndufa1	0.00335684	0.00256756	0.110124	0.0193557	0.1626	0.1102	0.992956	0.0157501
ENSMUSG00000051451	Crebzf	0.00336031	0.00208789	-0.0934946	0.0118253	0.1806	0.2436	1	0
ENSMUSG00000028656	Cap1	0.00352619	0.00378158	-0.0999231	0.011098	0.316	0.3878	1	0
ENSMUSG00000021665	Hexb	0.00352666	0.00361387	0.0934912	0.0090589	0.1458	0.097	1	0
ENSMUSG00000035067	Xkr6	0.00353584	0.00536863	-0.145384	0.0373173	0.765	0.8272	0.665865	0.46071
ENSMUSG00000057322	Rpl38	0.00354506	0.00451025	0.0906541	0.00911911	0.1768	0.1208	1	0
ENSMUSG00000068015	Lrch1	0.0035629	0.00213083	-0.0904868	0.0087618	0.2332	0.3018	1	0
ENSMUSG00000041607	Mbp	0.00358675	0.00554693	-0.158134	0.0207947	0.1564	0.2166	1	0
ENSMUSG00000073702	Rpl31	0.00359372	0.00210837	0.0772948	0.00899887	0.1952	0.1384	1	0
ENSMUSG00000045903	Npas4	0.00359691	0.00277657	0.155267	0.0314381	0.2288	0.1678	1	0
ENSMUSG00000045038	Prkce	0.00361898	0.00509171	-0.108743	0.0156418	0.8798	0.9114	1	0
ENSMUSG00000029673	Auts2	0.00362355	0.00354979	-0.0890518	0.00820256	0.9992	0.999	1	0	SFARI;EAGLE;TADA	0.0046251	Definitive	35.5	Concordant	1	0
ENSMUSG00000057359	Gm17494	0.00363223	0.00409133	-0.0697869	0.0218687	0.0914	0.1466	0.918583	0.182053
ENSMUSG00000031818	Cox4i1	0.00370123	0.0038741	0.147752	0.0111166	0.323	0.2592	1	0
ENSMUSG00000031840	Rab3a	0.0037141	0.00220107	0.0819905	0.00991479	0.1878	0.1326	1	0
ENSMUSG00000075415	Fnbp1	0.00371459	0.00479229	-0.082407	0.018714	0.1934	0.2612	1	0
ENSMUSG00000024393	Prrc2a	0.00372674	0.00456586	0.0902693	0.00850157	0.1784	0.1224	1	0
ENSMUSG00000036427	Gpi1	0.003788	0.00550043	0.112224	0.0115919	0.4236	0.349	1	0
ENSMUSG00000048701	Ccdc6	0.00384406	0.00459664	-0.090268	0.00751336	0.161	0.2216	1	0
ENSMUSG00000001175	Calm1	0.00384949	0.00487036	0.180033	0.0224285	0.6016	0.5552	1	0
ENSMUSG00000034488	Edil3	0.00395318	0.00544402	-0.204526	0.0306873	0.1976	0.2622	1	0
ENSMUSG00000024135	Srbd1	0.00400578	0.00484395	-0.104944	0.0127532	0.1784	0.2422	1	0
ENSMUSG00000062991	Nrg1	0.00402272	0.00621355	-0.0937208	0.0125126	1	0.9998	1	0
ENSMUSG00000025422	Agap2	0.00402292	0.00516464	0.130643	0.0271738	0.372	0.2996	1	0	SFARI					2	0
ENSMUSG00000020893	Per1	0.00405758	0.00508532	0.128548	0.0189605	0.2698	0.204	1	0	SFARI					2	0
ENSMUSG00000058444	Map2k5	0.00412198	0.00508172	-0.0939609	0.0132328	0.2598	0.3298	1	0
ENSMUSG00000110834	Gm39469	0.00420008	0.00229079	-0.0590182	0.00912648	0.1006	0.1502	1	0
ENSMUSG00000034157	Cipc	0.00420503	0.00638895	-0.102718	0.0133675	0.2678	0.3454	1	0
ENSMUSG00000039278	Pcsk1n	0.00423451	0.00581648	0.141274	0.0243533	0.4772	0.409	1	0
ENSMUSG00000021313	Ryr2	0.0042424	0.00685953	-0.182066	0.0280126	0.7148	0.7558	1	0
ENSMUSG00000049878	Rlf	0.00430262	0.00245628	-0.0798638	0.00678025	0.25	0.32	1	0
ENSMUSG00000029276	Glmn	0.00439602	0.00318697	-0.0620657	0.00814953	0.118	0.1724	1	0
ENSMUSG00000031618	Nr3c2	0.00442393	0.00580943	-0.114389	0.0252882	0.5756	0.6516	1	0	SFARI					1	1
ENSMUSG00000050545	Fam228b	0.00443885	0.00293758	-0.0701668	0.0099423	0.1228	0.176	1	0
ENSMUSG00000066392	Nrxn3	0.00445993	0.00706987	-0.0885975	0.0175064	1	1	1	0	SFARI;EAGLE		Moderate	11.1	Discordant	1	0
ENSMUSG00000044288	Cnr1	0.00448718	0.00332308	-0.205375	0.0387855	0.4184	0.481	1	0	SFARI					2	0
ENSMUSG00000071267	Zfp942	0.00451305	0.00599952	-0.0762013	0.0172261	0.0926	0.1452	1	0
ENSMUSG00000031605	Klhl2	0.00455161	0.00408301	-0.147591	0.0106932	0.6252	0.6614	1	0
ENSMUSG00000028289	Epha7	0.00465201	0.00544411	-0.139333	0.0259707	0.6496	0.722	1	0
ENSMUSG00000036751	Cox6b1	0.00465761	0.00432532	0.11359	0.0116368	0.2204	0.1634	1	0
ENSMUSG00000039059	Hrh3	0.00466765	0.00770279	0.107186	0.0202396	0.1744	0.1136	1	0
ENSMUSG00000022489	Pde1b	0.00466843	0.00549425	0.14451	0.0165425	0.7396	0.7164	1	0
ENSMUSG00000026626	Ppp2r5a	0.0046812	0.00532679	-0.0915391	0.015369	0.192	0.255	1	0
ENSMUSG00000030067	Foxp1	0.00468732	0.00579713	-0.104006	0.0133705	0.9916	0.9918	1	0	SFARI;EAGLE;TADA	0	Definitive	60.45	Concordant	1	1
ENSMUSG00000036748	Cuedc2	0.00471083	0.00797709	0.0713036	0.00731401	0.111	0.0664	1	0
ENSMUSG00000025279	Dnase1l3	0.00472438	0.00378271	0.162698	0.0282752	0.244	0.185	1	0
ENSMUSG00000024073	Birc6	0.00472538	0.0051607	-0.109118	0.0305433	0.6522	0.7522	0.950008	0.111784	SFARI					2	0
ENSMUSG00000052139	Babam2	0.00472843	0.00934346	-0.127979	0.0286121	0.3722	0.4622	0.955365	0.0998071
ENSMUSG00000010608	Rbm25	0.00473397	0.00305211	-0.100708	0.00948489	0.5734	0.644	1	0
ENSMUSG00000061787	Rps17	0.00475037	0.00342202	0.070284	0.0112768	0.1296	0.0834	1	0
ENSMUSG00000022283	Pabpc1	0.0048019	0.00233729	0.107467	0.00560088	0.2876	0.2274	1	0	SFARI					3	0
ENSMUSG00000107872	Gm44511	0.00483574	0.00929481	0.150596	0.0169806	0.5696	0.508	1	0
ENSMUSG00000061718	Ppp1r1b	0.0049595	0.00737758	0.168804	0.0303655	0.5354	0.4784	1	0	SFARI					2	0
ENSMUSG00000054453	Sytl5	0.00502082	0.00483475	-0.0816974	0.0246141	0.1558	0.2194	0.858712	0.315929
ENSMUSG00000024983	Vti1a	0.00506845	0.00774527	-0.138706	0.0276011	0.4976	0.5744	1	0
ENSMUSG00000071252	2210408I21Rik	0.00509399	0.00256831	-0.119965	0.0149917	0.3588	0.4258	1	0
ENSMUSG00000037428	Vgf	0.00514886	0.00322128	0.12208	0.0109524	0.2518	0.1948	1	0
ENSMUSG00000024081	Cebpz	0.00516542	0.00406991	-0.0919564	0.0119816	0.2496	0.3162	1	0
ENSMUSG00000037990	Sh3rf3	0.00517362	0.00352063	-0.115488	0.0200274	0.498	0.5662	1	0	SFARI					2	0
ENSMUSG00000004383	Large1	0.00527587	0.00553235	-0.108606	0.0271875	0.8286	0.8532	0.819251	0.404168
ENSMUSG00000089710	Gm15810	0.0053054	0.0035699	-0.117842	0.0193403	0.3054	0.3716	1	0
ENSMUSG00000033632	AW554918	0.00536518	0.00642581	-0.0979862	0.0179451	0.2318	0.3054	0.947685	0.116979
ENSMUSG00000102869	Norad	0.00537657	0.00528329	0.0954408	0.0156479	0.2244	0.1664	1	0
ENSMUSG00000024897	Apba1	0.00538586	0.00905804	-0.0874186	0.0215339	0.156	0.2204	1	0
ENSMUSG00000028080	Lrba	0.00543365	0.00554618	-0.122815	0.0197048	0.7944	0.8532	1	0	SFARI					2	0
ENSMUSG00000064202	Spata6l	0.00543375	0.00868191	-0.0640628	0.00945376	0.0762	0.1226	1	0
ENSMUSG00000018770	Atp5g3	0.00554858	0.00756045	0.102665	0.0160224	0.232	0.1706	1	0
ENSMUSG00000044477	Zfand3	0.00558359	0.00414671	-0.0986576	0.020204	0.4744	0.5434	1	0
ENSMUSG00000062044	Lmtk3	0.00563827	0.0124767	0.129769	0.0393093	0.3388	0.2542	0.764761	0.366465	SFARI					3	0
ENSMUSG00000068696	Gpr88	0.00565293	0.00504578	0.19428	0.0251393	0.6572	0.6166	1	0
ENSMUSG00000018417	Myo1b	0.00570649	0.0111578	-0.122116	0.0364804	0.3974	0.4852	0.863058	0.306212
ENSMUSG00000044216	Kcnj4	0.00573309	0.00629093	0.0946292	0.0137196	0.2146	0.1576	1	0
ENSMUSG00000034285	Nipsnap1	0.00581136	0.00688742	-0.0863665	0.0142974	0.112	0.1682	1	0
ENSMUSG00000032946	Rasgrp2	0.00582804	0.00674487	0.10788	0.0176212	0.5086	0.437	1	0
ENSMUSG00000025372	Baiap2	0.0058625	0.0052553	0.133477	0.0212748	0.8382	0.823	1	0
ENSMUSG00000027016	Zfp385b	0.00589908	0.00539355	-0.126774	0.00996448	0.9412	0.9608	1	0	SFARI					2	0
ENSMUSG00000026202	Tuba4a	0.00590126	0.00881913	0.106608	0.0185223	0.2126	0.1554	1	0
ENSMUSG00000054387	Mdm4	0.00592988	0.00825105	-0.112462	0.035337	0.3628	0.447	0.807219	0.431071
ENSMUSG00000032405	Pias1	0.00600459	0.00904593	-0.117812	0.0344384	0.4338	0.533	0.830633	0.378717
ENSMUSG00000000861	Bcl11a	0.0060329	0.00262094	-0.103753	0.0152636	0.4538	0.5326	1	0	SFARI;EAGLE;TADA	0.00044409	Moderate	9.15	Discordant	1	1
ENSMUSG00000026443	Lrrn2	0.00606048	0.00657226	0.10734	0.0177084	0.3298	0.2636	1	0
ENSMUSG00000061136	Prpf40a	0.00609107	0.00398165	-0.08658	0.0164039	0.381	0.465	1	0
ENSMUSG00000043432	Leng9	0.00610435	0.00412693	0.0998098	0.0127954	0.3058	0.2438	1	0
ENSMUSG00000029822	Osbpl3	0.00622172	0.00884823	-0.0990724	0.0345325	0.2586	0.3398	0.866576	0.298344
ENSMUSG00000030303	Far2	0.00623479	0.00764357	-0.0879126	0.019591	0.215	0.2822	1	0
ENSMUSG00000059602	Syn3	0.00626967	0.0129552	-0.128816	0.0227302	0.3994	0.4892	1	0
ENSMUSG00000009647	Mcu	0.00627126	0.00799636	-0.114795	0.0292514	0.4388	0.5204	0.865501	0.300749
ENSMUSG00000031428	Zcchc18	0.00631568	0.00493004	0.178666	0.0316415	0.4598	0.4164	0.932091	0.151848
ENSMUSG00000025782	Taf3	0.0065384	0.00726731	-0.0789398	0.0104911	0.1628	0.2226	1	0
ENSMUSG00000036782	Klhl13	0.00657356	0.0067311	-0.0837629	0.0127989	0.2848	0.354	1	0
ENSMUSG00000071415	Rpl23	0.00665663	0.00600764	0.0760657	0.00968903	0.1396	0.0928	1	0
ENSMUSG00000024335	Brd2	0.00666465	0.00659566	0.118173	0.0189591	0.2432	0.1864	1	0
ENSMUSG00000042807	Hecw2	0.00669602	0.00866925	-0.129429	0.0295182	0.8394	0.879	0.912219	0.196283	SFARI					2	0
ENSMUSG00000040794	C1qtnf4	0.00671735	0.00971992	0.167023	0.0240076	0.5212	0.4692	1	0
ENSMUSG00000048602	Morc2b	0.00671767	0.00602852	-0.0766765	0.00896429	0.0866	0.1318	1	0
ENSMUSG00000084786	Ubl5	0.00676903	0.00829921	0.094033	0.0156997	0.148	0.0992	1	0
ENSMUSG00000034687	Fras1	0.00678418	0.0117407	-0.136823	0.0183119	0.6818	0.7438	1	0
ENSMUSG00000024556	Me2	0.00679075	0.00618861	-0.117066	0.0152221	0.2208	0.2822	1	0
ENSMUSG00000042680	Garem1	0.00679481	0.00509507	-0.109772	0.00390581	0.5384	0.6222	1	0
ENSMUSG00000074505	Fat3	0.00694306	0.00535099	-0.0947952	0.0216354	0.884	0.9178	1	0
ENSMUSG00000035632	Cnot3	0.00697399	0.0142008	0.12318	0.0230757	0.3584	0.2874	1	0	SFARI;EAGLE;TADA	0.00572418	Limited	5.6	Discordant	1	1
ENSMUSG00000025225	Nfkb2	0.00717443	0.00779477	0.0889425	0.0159986	0.1854	0.1322	1	0
ENSMUSG00000052920	Prkg1	0.0071815	0.00501716	0.222455	0.062511	0.408	0.3432	1	0
ENSMUSG00000021715	Cwc27	0.00722158	0.00758282	-0.105922	0.0169613	0.2642	0.3304	1	0
ENSMUSG00000033545	Znrf1	0.00726398	0.00539841	-0.098554	0.0341184	0.5932	0.678	0.914697	0.190744
ENSMUSG00000034544	Rsrc1	0.00745183	0.00730585	-0.0946761	0.0175298	0.2846	0.3516	1	0	SFARI						1
ENSMUSG00000051401	Kctd16	0.00749204	0.0058866	-0.100842	0.0125329	0.98	0.978	1	0
ENSMUSG00000015087	Rabl6	0.00751316	0.0043302	-0.0874461	0.00552499	0.3026	0.3682	1	0
ENSMUSG00000113608	Gm48715	0.00752858	0.0130731	0.0823093	0.0189565	0.1638	0.1112	1	0
ENSMUSG00000032356	Rasgrf1	0.00761722	0.00895482	-0.108023	0.0276509	0.5428	0.6078	1	0
ENSMUSG00000054823	Nsd3	0.00765367	0.00611969	-0.0986856	0.0231088	0.506	0.5798	1	0
ENSMUSG00000022208	Jph4	0.00769127	0.0105099	0.114985	0.017113	0.4528	0.3872	1	0
ENSMUSG00000024969	Mark2	0.00773474	0.0139744	-0.113349	0.0266908	0.6154	0.6982	0.986727	0.02968	SFARI;TADA	1.2e-05				2	0
ENSMUSG00000025909	Sntg1	0.00788643	0.00618446	-0.108803	0.013717	0.9288	0.9388	1	0
ENSMUSG00000074024	4632427E13Rik	0.00788702	0.0102866	-0.110674	0.0284811	0.2896	0.3592	1	0
ENSMUSG00000026249	Serpine2	0.00794037	0.00904984	0.123892	0.032994	0.3092	0.2502	1	0
ENSMUSG00000024785	Rcl1	0.00795059	0.00955856	-0.0653412	0.0109226	0.0704	0.1122	1	0
ENSMUSG00000031778	Cx3cl1	0.00797398	0.00711724	0.130099	0.0127037	0.4502	0.3968	1	0
ENSMUSG00000046876	Atxn1	0.00810852	0.010628	-0.0978975	0.015138	0.9684	0.9808	1	0
ENSMUSG00000004936	Map2k1	0.0081254	0.0101461	0.106859	0.0200474	0.3106	0.2522	1	0
ENSMUSG00000044452	Zfp507	0.00814404	0.0134236	-0.0579815	0.0121417	0.0774	0.1244	1	0
ENSMUSG00000037533	Rapgef6	0.00815319	0.00713847	-0.115369	0.0221818	0.669	0.738	1	0
ENSMUSG00000059586	Nsmce2	0.00826063	0.0163445	-0.0913994	0.0253811	0.3416	0.4262	1	0
ENSMUSG00000025776	Crispld1	0.00829021	0.00792224	-0.0762615	0.0105327	0.1138	0.1636	1	0
ENSMUSG00000011179	Odc1	0.00830304	0.00604851	0.0562266	0.0093023	0.1198	0.078	1	0
ENSMUSG00000022269	Marchf11	0.00834822	0.00761969	-0.0981123	0.0174016	0.194	0.2546	1	0
ENSMUSG00000039115	Itga9	0.00841232	0.00926173	-0.0987011	0.0178682	0.1946	0.2538	1	0
ENSMUSG00000006576	Slc4a3	0.00841377	0.0136189	0.124475	0.0206804	0.4586	0.39	1	0
ENSMUSG00000039953	Clstn1	0.00844997	0.0130906	0.147081	0.0337242	0.4406	0.3758	1	0
ENSMUSG00000006599	Gtf2h1	0.00856248	0.0106308	-0.0765835	0.00965932	0.1226	0.1738	1	0
ENSMUSG00000061028	Clasrp	0.00857117	0.0094525	0.0877459	0.00916095	0.1794	0.129	1	0
ENSMUSG00000117521	Gm50024	0.00861107	0.00918316	-0.0970845	0.0119421	0.2606	0.3198	1	0
ENSMUSG00000029136	Rbks	0.00862039	0.017324	-0.0693731	0.0121839	0.0742	0.1212	1	0
ENSMUSG00000017404	Rpl19	0.00869648	0.0145831	0.118482	0.0174577	0.2154	0.1576	1	0
ENSMUSG00000061576	Dpp6	0.00886897	0.0104152	-0.111051	0.0177248	0.9478	0.9512	1	0	SFARI					2	0
ENSMUSG00000016493	Cd46	0.00896964	0.0142861	-0.0736423	0.0226843	0.1734	0.2406	1	0
ENSMUSG00000017778	Cox7c	0.00899664	0.00561362	0.116732	0.0316118	0.3558	0.29	0.85897	0.315353
ENSMUSG00000026361	Cdc73	0.0090428	0.00693246	-0.0955057	0.0107772	0.296	0.3566	1	0
ENSMUSG00000024873	Cnih2	0.00907477	0.00528137	0.0791548	0.00578282	0.1612	0.1152	1	0
ENSMUSG00000050334	C130071C03Rik	0.00922682	0.0116021	-0.12146	0.0227378	0.4688	0.5344	1	0
ENSMUSG00000031760	Mt3	0.0092803	0.00789377	0.0806393	0.0158746	0.141	0.0944	1	0
ENSMUSG00000036469	Marchf1	0.00928125	0.0137586	0.221234	0.0209301	0.5792	0.5298	1	0
ENSMUSG00000032959	Pebp1	0.00938072	0.00830578	0.0955659	0.0151238	0.2106	0.1572	1	0
ENSMUSG00000020859	Spag9	0.00940652	0.0151792	-0.115163	0.0195679	0.616	0.682	1	0
ENSMUSG00000030505	Prmt3	0.0094549	0.0116089	-0.0608811	0.0124915	0.0848	0.1306	1	0
ENSMUSG00000058076	Sdhc	0.00946801	0.00796009	-0.0621898	0.0109959	0.1062	0.1548	1	0
ENSMUSG00000016150	Tenm1	0.00953518	0.010301	-0.185742	0.0216177	0.4604	0.5204	1	0
ENSMUSG00000051166	Eml5	0.00964878	0.00655246	-0.119737	0.0106722	0.8072	0.8612	1	0
ENSMUSG00000061751	Kalrn	0.00965563	0.00326164	-0.0952949	0.00950977	0.9636	0.9698	1	0
ENSMUSG00000043733	Ptpn11	0.00968541	0.00686799	-0.0779284	0.00605892	0.2856	0.3476	1	0	SFARI					1	1
ENSMUSG00000029420	Rimbp2	0.00970375	0.00696014	-0.0860013	0.0247442	0.4254	0.4992	1	0
ENSMUSG00000006930	Hap1	0.00971659	0.0100957	0.0997382	0.0177118	0.2098	0.1574	1	0
ENSMUSG00000038502	Ptov1	0.00974067	0.0178866	0.0798467	0.0202421	0.162	0.1082	1	0
ENSMUSG00000029173	Sepsecs	0.00980792	0.00741684	-0.0528333	0.00480979	0.0746	0.115	1	0
ENSMUSG00000024661	Fth1	0.00990366	0.0092425	0.147619	0.0188147	0.3656	0.3076	1	0
ENSMUSG00000029647	Pan3	0.0099667	0.0128794	-0.115152	0.0215577	0.5178	0.5854	1	0
ENSMUSG00000059474	Mbtd1	0.0100127	0.0178255	-0.090852	0.0277893	0.4786	0.5596	1	0
ENSMUSG00000026313	Hdac4	0.0100577	0.0166423	-0.0776045	0.0224064	0.2016	0.2664	1	0	SFARI					2	1
ENSMUSG00000062257	Opcml	0.0100625	0.0123883	-0.104283	0.0282006	0.9604	0.9704	1	0
ENSMUSG00000070866	Zfp804a	0.0100866	0.0113471	-0.112338	0.0146855	0.7448	0.802	1	0	SFARI					2	0
ENSMUSG00000027263	Tubgcp4	0.010118	0.012468	-0.0691512	0.0106809	0.0824	0.125	1	0
ENSMUSG00000030122	Ptms	0.0101671	0.00845465	0.0916857	0.00916415	0.2912	0.2334	1	0
ENSMUSG00000043289	Mei4	0.0102618	0.0114806	-0.107284	0.0217878	0.4894	0.5652	1	0
ENSMUSG00000022973	Synj1	0.0103188	0.0085091	-0.0935598	0.0227975	0.3762	0.443	1	0	SFARI					2	0
ENSMUSG00000008763	Man1a2	0.0103631	0.00995687	-0.0891927	0.0202691	0.4852	0.5636	1	0
ENSMUSG00000085631	9630028H03Rik	0.0103879	0.00577372	-0.100361	0.0109959	0.3918	0.4566	1	0
ENSMUSG00000048410	Zfp407	0.0104511	0.0147547	-0.106378	0.0383914	0.4818	0.5628	1	0
ENSMUSG00000058192	Zfp846	0.0105263	0.00933374	-0.0593366	0.00994867	0.0934	0.1378	1	0
ENSMUSG00000075706	Gpx4	0.0105371	0.0227847	0.095674	0.0201895	0.1418	0.0888	1	0
ENSMUSG00000024188	Luc7l	0.0107978	0.00738517	-0.0556406	0.0112409	0.199	0.2604	1	0
ENSMUSG00000028176	Lrrc7	0.0108464	0.0108111	-0.0687087	0.0089377	1	1	1	0
ENSMUSG00000020184	Mdm2	0.0108767	0.0154179	-0.0829437	0.0144745	0.1954	0.2562	1	0
ENSMUSG00000036800	Fam135b	0.0108786	0.0179504	-0.107204	0.0170921	0.5738	0.6628	1	0
ENSMUSG00000063972	Nr6a1	0.0109247	0.0150296	-0.115084	0.0369329	0.3958	0.4704	1	0
ENSMUSG00000050711	Scg2	0.0109726	0.0184089	0.139633	0.0132641	0.1884	0.1376	1	0
ENSMUSG00000039191	Rbpj	0.0110046	0.0114061	-0.0608837	0.00906359	0.1166	0.164	1	0
ENSMUSG00000039697	Ncoa7	0.0110382	0.00576385	-0.0647611	0.0149216	0.392	0.4684	1	0
ENSMUSG00000030102	Itpr1	0.0110474	0.0104075	-0.0945189	0.0120161	0.9712	0.9788	1	0	SFARI					2	0
ENSMUSG00000047412	Zbtb44	0.0110688	0.00744146	-0.067542	0.0115565	0.1056	0.1514	1	0
ENSMUSG00000040028	Elavl1	0.0111396	0.0086297	-0.074879	0.00961251	0.1448	0.1956	1	0
ENSMUSG00000055302	Mrfap1	0.0111466	0.00742421	0.0663362	0.00390918	0.1396	0.0974	1	0
ENSMUSG00000056211	R3hdm1	0.0112355	0.0137695	-0.143462	0.0300183	0.9678	0.986	0.893924	0.237193
ENSMUSG00000052387	Trpm3	0.0112356	0.013819	0.18708	0.0286026	0.5216	0.4594	1	0
ENSMUSG00000056222	Spock1	0.0112771	0.0205912	-0.115622	0.0242061	0.687	0.745	1	0
ENSMUSG00000039318	Rab3gap2	0.011298	0.00996078	-0.100957	0.0266704	0.3318	0.4036	1	0
ENSMUSG00000046679	C87436	0.0114779	0.0127954	-0.0518548	0.00792977	0.0806	0.123	1	0
ENSMUSG00000019923	Zwint	0.0115362	0.0201316	0.146253	0.0297613	0.4354	0.381	1	0
ENSMUSG00000021831	Ero1a	0.011564	0.00750617	-0.0660998	0.0108351	0.1456	0.1968	1	0
ENSMUSG00000035305	Ror1	0.0115898	0.0103288	-0.109183	0.0166372	0.3272	0.3966	1	0
ENSMUSG00000029640	Usp12	0.0116146	0.0116053	-0.0599178	0.00967362	0.0986	0.1432	1	0
ENSMUSG00000045975	C2cd2	0.011699	0.0208357	-0.0593065	0.0159513	0.0906	0.1406	1	0
ENSMUSG00000035173	Ccdc186	0.0118036	0.0058828	-0.0637981	0.00550344	0.1092	0.153	1	0
ENSMUSG00000025537	Phkg1	0.0118137	0.00784292	0.18958	0.0244492	0.127	0.0886	1	0
ENSMUSG00000027134	Lpcat4	0.0119225	0.0084979	0.079057	0.0147904	0.242	0.187	1	0
ENSMUSG00000024558	Mapk4	0.0119259	0.00872139	-0.107967	0.0172115	0.6256	0.6822	1	0
ENSMUSG00000026235	Epha4	0.0119865	0.00883704	-0.0947245	0.0201946	0.6326	0.699	1	0
ENSMUSG00000052544	St6galnac3	0.0120792	0.0111039	-0.129143	0.0182888	0.3246	0.3852	1	0
ENSMUSG00000042766	Trim46	0.01225	0.0124841	-0.119476	0.0115447	0.3374	0.3996	1	0
ENSMUSG00000057530	Ece1	0.0123379	0.0265613	-0.0889788	0.0246776	0.1762	0.2426	1	0
ENSMUSG00000079055	Slc8a3	0.0124157	0.0203463	-0.10872	0.024312	0.3552	0.4274	1	0
ENSMUSG00000023965	Fbxl17	0.0126639	0.00923887	-0.0819666	0.011534	0.8238	0.8542	1	0
ENSMUSG00000043991	Pura	0.012738	0.0217764	-0.102017	0.0188972	0.2784	0.3456	1	0
ENSMUSG00000004933	Matk	0.0127557	0.0248366	0.135212	0.0304845	0.4632	0.3976	1	0
ENSMUSG00000028488	Sh3gl2	0.0129114	0.0129961	-0.105044	0.0204732	0.2878	0.3536	1	0
ENSMUSG00000026470	Stx6	0.0129221	0.00914475	-0.0799992	0.0276751	0.1992	0.2578	1	0
ENSMUSG00000074305	Peak1	0.0129499	0.00782312	-0.0772036	0.00979168	0.3756	0.4502	1	0
ENSMUSG00000022043	Trim35	0.0130403	0.020314	-0.0831123	0.0267241	0.3708	0.4492	1	0
ENSMUSG00000056536	Pign	0.0130673	0.0110122	-0.0691114	0.0107458	0.1642	0.2162	1	0
ENSMUSG00000039210	Gpatch2	0.0131192	0.0164464	-0.0731005	0.0176468	0.1544	0.2096	1	0
ENSMUSG00000022708	Zbtb20	0.0131589	0.0164882	0.141218	0.0372247	0.9002	0.8846	1	0	SFARI					1	1
ENSMUSG00000026659	Dusp12	0.0131958	0.0164746	-0.048771	0.00963951	0.1014	0.147	1	0
ENSMUSG00000050856	Atp5k	0.0135287	0.019309	0.11809	0.0210321	0.2006	0.15	1	0
ENSMUSG00000048264	Dip2c	0.0135911	0.0149542	-0.109851	0.025188	0.9028	0.9274	1	0	SFARI					2	0
ENSMUSG00000016200	Syt14	0.0136396	0.0154126	-0.0748598	0.0259825	0.6174	0.6998	1	0
ENSMUSG00000033499	Larp4b	0.0137396	0.0216486	-0.0803187	0.0263579	0.3124	0.3832	1	0
ENSMUSG00000038563	Efl1	0.013775	0.0240409	-0.0707335	0.0140132	0.1228	0.1738	1	0
ENSMUSG00000021991	Cacna2d3	0.0137757	0.0126674	-0.06575	0.0109043	0.9992	0.996	1	0	SFARI;EAGLE		Limited	3.75	Discordant	1	0
ENSMUSG00000023923	Tbc1d5	0.0138666	0.015831	-0.117449	0.0197348	0.6124	0.6732	1	0	SFARI					2	0
ENSMUSG00000061455	Stx17	0.0139523	0.0231128	-0.0619854	0.0102391	0.0804	0.1242	1	0
ENSMUSG00000063480	Snu13	0.0139815	0.0151009	0.0655991	0.0173701	0.115	0.0738	1	0
ENSMUSG00000030518	Fam189a1	0.0140306	0.027341	-0.148214	0.0343589	0.5078	0.5716	1	0
ENSMUSG00000024462	Gabbr1	0.0141372	0.0259518	0.159306	0.0321005	0.588	0.5444	1	0
ENSMUSG00000037058	Paip2	0.0142048	0.0150264	-0.0977205	0.0174645	0.3626	0.4252	1	0
ENSMUSG00000001424	Snd1	0.0142722	0.00874986	-0.0714906	0.0151236	0.3986	0.469	1	0	SFARI					2	0
ENSMUSG00000058317	Ube2e2	0.0143557	0.018804	-0.117215	0.0219733	0.7326	0.7792	1	0
ENSMUSG00000029207	Apbb2	0.0143837	0.00897537	-0.0817804	0.0117965	0.3778	0.4414	1	0
ENSMUSG00000026103	Gls	0.0143915	0.0243244	-0.0961174	0.0315974	0.755	0.8004	1	0
ENSMUSG00000023175	Bsg	0.0146259	0.0136031	0.0805429	0.0123215	0.2296	0.1778	1	0
ENSMUSG00000022139	Mbnl2	0.0146397	0.0138599	-0.0886365	0.0133244	0.8418	0.8916	1	0
ENSMUSG00000008348	Ubc	0.0146717	0.0157192	0.114998	0.0248309	0.2602	0.2078	1	0
ENSMUSG00000056602	Fry	0.0146782	0.0146403	-0.0992367	0.0134162	0.9102	0.9252	1	0
ENSMUSG00000041308	Sntb2	0.0147208	0.0149245	-0.0753509	0.00850768	0.3988	0.4676	1	0
ENSMUSG00000022995	Enah	0.0147462	0.0137713	-0.108689	0.0213594	0.2704	0.3298	1	0
ENSMUSG00000029775	Klhdc10	0.014755	0.026854	-0.109096	0.0445418	0.3402	0.415	0.963375	0.0818962
ENSMUSG00000113136	Gm19951	0.0147643	0.0148253	0.0808783	0.010817	0.1544	0.1104	1	0
ENSMUSG00000032174	Icam5	0.0147897	0.0121321	0.116305	0.0123962	0.4342	0.3866	1	0
ENSMUSG00000092083	Kcnb2	0.0148687	0.0131719	-0.122604	0.0176357	0.4658	0.52	1	0
ENSMUSG00000026527	Rgs7	0.0149481	0.0133723	-0.104494	0.0211407	0.8434	0.8876	1	0	SFARI					2	0
ENSMUSG00000028577	Plaa	0.0149823	0.0261997	-0.0715687	0.0186368	0.1194	0.1728	1	0
ENSMUSG00000043831	Lysmd4	0.0150055	0.0102237	-0.0695634	0.00764616	0.2148	0.272	1	0
ENSMUSG00000036225	Kctd1	0.015143	0.0278256	-0.0812534	0.0136839	0.5524	0.6322	1	0
ENSMUSG00000026504	Sdccag8	0.0152596	0.0171513	-0.076685	0.0192417	0.3226	0.3898	1	0
ENSMUSG00000025326	Ube3a	0.0153425	0.00923964	-0.0822269	0.0127262	0.7626	0.8032	1	0	SFARI					1	1
ENSMUSG00000036167	Pphln1	0.015386	0.0186389	-0.06341	0.0135026	0.0986	0.145	1	0
ENSMUSG00000005338	Cadm3	0.0154229	0.0165688	0.0936298	0.0177444	0.2202	0.1672	1	0
ENSMUSG00000024589	Nedd4l	0.0155103	0.00953082	-0.110734	0.0159056	0.8796	0.901	1	0
ENSMUSG00000025278	Flnb	0.0155602	0.0103982	-0.0811925	0.00876687	0.2302	0.2844	1	0
ENSMUSG00000038181	Chpf2	0.0156168	0.0217819	0.0836034	0.017064	0.2016	0.1508	1	0
ENSMUSG00000040123	Zmym5	0.0156752	0.00815249	-0.0541297	0.00476923	0.217	0.2768	1	0
ENSMUSG00000041650	Pcca	0.0157074	0.0207026	-0.0839084	0.0276373	0.3522	0.419	1	0	SFARI						1
ENSMUSG00000000416	Cttnbp2	0.0157531	0.0191043	-0.112272	0.0133912	0.902	0.9262	1	0	SFARI					2	0
ENSMUSG00000045083	Lingo2	0.0157964	0.0190274	0.117547	0.0555986	0.1352	0.09	1	0
ENSMUSG00000028410	Dnaja1	0.0157996	0.0305457	0.123238	0.0233353	0.3454	0.2806	1	0
ENSMUSG00000056427	Slit3	0.0158504	0.0203638	-0.0799788	0.0174293	0.9376	0.9618	1	0
ENSMUSG00000063568	Jazf1	0.0159053	0.0109005	-0.0825462	0.014402	0.436	0.5016	1	0
ENSMUSG00000021385	Ippk	0.0159857	0.0155195	-0.0652093	0.0166032	0.1466	0.1988	1	0
ENSMUSG00000031647	Mfap3l	0.0160025	0.0118805	-0.0711544	0.00627935	0.1386	0.1842	1	0
ENSMUSG00000064293	Cntn4	0.0161008	0.013638	-0.0979287	0.019512	0.9674	0.9706	1	0	SFARI					2	0
ENSMUSG00000030086	Chchd6	0.016127	0.0153684	-0.0628735	0.0180242	0.1788	0.2352	1	0
ENSMUSG00000026322	Htr4	0.0161707	0.0171652	-0.132291	0.0237639	0.2122	0.2646	1	0
ENSMUSG00000032352	Lrrc1	0.0162594	0.0210292	-0.0806277	0.0145647	0.3296	0.3994	1	0	SFARI					2	0
ENSMUSG00000034480	Diaph2	0.0163285	0.022263	-0.091309	0.013466	0.9036	0.9208	1	0
ENSMUSG00000055932	Fto	0.0163694	0.0164673	-0.0740321	0.0267329	0.475	0.5572	1	0
ENSMUSG00000026349	Ccnt2	0.0163885	0.0142398	-0.0741204	0.014386	0.385	0.4522	1	0
ENSMUSG00000034152	Exoc3	0.0163918	0.0284741	-0.0818716	0.0168078	0.224	0.2854	1	0	SFARI					2	0
ENSMUSG00000033909	Usp36	0.0164143	0.0119535	-0.0659169	0.0167193	0.127	0.1746	1	0
ENSMUSG00000029108	Pcdh7	0.0164946	0.025368	-0.125491	0.0322916	0.7886	0.8316	1	0
ENSMUSG00000050310	Rictor	0.0165782	0.00972988	-0.069345	0.00808634	0.3586	0.4224	1	0
ENSMUSG00000024500	Ppp2r2b	0.0166955	0.0355285	-0.124196	0.0296673	0.8218	0.8604	1	0
ENSMUSG00000028519	Dab1	0.0167044	0.0208419	-0.118012	0.0248076	0.9542	0.9652	1	0
ENSMUSG00000022897	Dyrk1a	0.0168583	0.0178609	-0.101681	0.0241891	0.3788	0.4356	1	0	SFARI;EAGLE;TADA	1.78e-13	Definitive	20.2	Concordant	1	1
ENSMUSG00000058239	Usf2	0.0169802	0.0173006	0.0610635	0.0158554	0.1252	0.0846	1	0
ENSMUSG00000019856	Fam184a	0.0170437	0.0203629	-0.0962154	0.0131007	0.3308	0.3956	1	0
ENSMUSG00000029110	Rnf4	0.0172605	0.0117368	-0.049706	0.00835422	0.096	0.1374	1	0
ENSMUSG00000038267	Slc22a23	0.0172678	0.0282639	-0.147027	0.0286492	0.5924	0.6452	1	0
ENSMUSG00000085201	Nr6a1os	0.0173082	0.0224056	-0.0641085	0.0179631	0.1082	0.1578	1	0
ENSMUSG00000023150	Ivns1abp	0.0173498	0.0212775	0.12421	0.0263119	0.7342	0.7074	1	0
ENSMUSG00000000740	Rpl13	0.0173873	0.0220074	0.10039	0.0206514	0.2278	0.1734	1	0
ENSMUSG00000019828	Grm1	0.0174066	0.0197361	-0.114439	0.0274411	0.8852	0.8928	1	0
ENSMUSG00000030516	Tjp1	0.0174144	0.0168302	-0.0919876	0.0222481	0.7052	0.7792	1	0
ENSMUSG00000054280	Prr14l	0.0174756	0.0107146	-0.0802958	0.00724901	0.1688	0.2172	1	0	TADA	0.0546925
ENSMUSG00000104106	Gm10848	0.0174893	0.00848432	-0.0698794	0.0127519	0.3982	0.4634	1	0
ENSMUSG00000024006	Stk38	0.0175955	0.0181486	-0.0685693	0.0122866	0.223	0.282	1	0
ENSMUSG00000084957	Bbip1	0.0176549	0.011533	-0.0636719	0.0130235	0.1752	0.2278	1	0
ENSMUSG00000032294	Pkm	0.0176642	0.0332156	0.134718	0.0172774	0.3328	0.2724	1	0
ENSMUSG00000028414	Fktn	0.0178454	0.0312747	-0.0667396	0.0206176	0.096	0.1444	1	0
ENSMUSG00000021071	Trim9	0.0179207	0.0143758	-0.105313	0.00991071	0.7184	0.783	1	0
ENSMUSG00000030768	Disp1	0.0180952	0.0188282	-0.0449511	0.00736482	0.076	0.1136	1	0
ENSMUSG00000027351	Spred1	0.0181275	0.0211242	-0.111365	0.022731	0.6716	0.7122	1	0
ENSMUSG00000030199	Etv6	0.0181549	0.016789	-0.0902837	0.0212532	0.1864	0.2384	1	0
ENSMUSG00000031870	Pgr	0.0182128	0.0187701	-0.0675301	0.0108599	0.1098	0.154	1	0
ENSMUSG00000035203	Epn1	0.0182364	0.00683535	0.0735904	0.00610891	0.1916	0.1468	1	0
ENSMUSG00000037669	Ldah	0.018255	0.0146727	-0.0650118	0.00832666	0.151	0.198	1	0
ENSMUSG00000028945	Rheb	0.0183951	0.0159593	0.114773	0.0180545	0.228	0.1766	1	0	SFARI						1
ENSMUSG00000038608	Dock10	0.0184754	0.0227285	-0.136759	0.0279671	0.4276	0.4766	1	0
ENSMUSG00000040860	Crocc	0.0186154	0.0339377	0.10545	0.025113	0.3854	0.319	1	0
ENSMUSG00000005886	Ncoa2	0.0186449	0.0282593	-0.120195	0.0227644	0.5448	0.62	1	0
ENSMUSG00000036840	Siah1a	0.0188001	0.0133532	-0.0483293	0.00651918	0.1136	0.1572	1	0
ENSMUSG00000030092	Cntn6	0.0188138	0.0256922	-0.0852485	0.0373306	0.4946	0.5718	1	0	SFARI					2	0
ENSMUSG00000035696	Rnf38	0.0188635	0.00971784	-0.0538309	0.00693438	0.2118	0.2676	1	0	SFARI					2	0
ENSMUSG00000037706	Cd81	0.0188812	0.0135673	0.0882477	0.0100106	0.2056	0.1592	1	0
ENSMUSG00000034310	Tmem132d	0.0190008	0.0181449	-0.0985134	0.0166847	0.0884	0.1266	1	0
ENSMUSG00000032621	Srek1	0.0190185	0.021912	-0.0829837	0.0292069	0.6306	0.7048	1	0
ENSMUSG00000019947	Arid5b	0.0190955	0.0355253	-0.0913917	0.0249138	0.173	0.2292	1	0
ENSMUSG00000036438	Calm2	0.0191923	0.00633412	0.145591	0.00528448	0.7506	0.7528	1	0
ENSMUSG00000029406	Pitpnm2	0.0192571	0.016547	0.0978462	0.0223548	0.4228	0.3618	1	0
ENSMUSG00000039630	Hnrnpu	0.0192654	0.0119278	-0.0901933	0.0231665	0.6128	0.6768	1	0	SFARI					1	1
ENSMUSG00000014498	Ankrd52	0.0193135	0.0189912	-0.0597601	0.0116623	0.0948	0.1358	1	0
ENSMUSG00000070565	Rasal2	0.0193452	0.0324297	-0.139759	0.0290733	0.6674	0.7402	1	0
ENSMUSG00000038481	Cdk19	0.0196514	0.0195432	-0.108976	0.0218712	0.337	0.3992	1	0	SFARI					3	1
ENSMUSG00000090137	Uba52	0.0196982	0.0262532	0.0630976	0.00620492	0.1154	0.078	1	0
ENSMUSG00000019146	Cacng2	0.0197259	0.0187832	-0.0712256	0.0216352	0.2722	0.3352	1	0
ENSMUSG00000053580	Tanc2	0.0198118	0.0399209	-0.124238	0.0263528	0.9368	0.9552	1	0	SFARI;EAGLE;TADA	0.00200495	Definitive	24.95	Concordant	1	1
ENSMUSG00000033671	Cep350	0.0198135	0.0297255	-0.0904663	0.0185084	0.3064	0.3664	1	0
ENSMUSG00000027889	Ampd2	0.0198753	0.0249126	0.0849297	0.0163464	0.1514	0.1096	1	0
ENSMUSG00000032386	Trip4	0.019899	0.0138787	-0.0708133	0.0149347	0.194	0.2434	1	0
ENSMUSG00000040040	Ift88	0.020178	0.0166944	-0.0691387	0.0128307	0.1322	0.1758	1	0
ENSMUSG00000025508	Rplp2	0.0202953	0.028724	0.0978804	0.0277484	0.1926	0.1406	1	0
ENSMUSG00000099401	Gm28375	0.0203164	0.0177808	-0.0518643	0.0101627	0.1298	0.174	1	0
ENSMUSG00000028351	Brinp1	0.0203364	0.0178803	-0.140804	0.00854873	0.8138	0.8446	1	0
ENSMUSG00000025192	Entpd7	0.0203772	0.024027	-0.0586133	0.0094086	0.0962	0.1382	1	0
ENSMUSG00000025212	Sfxn3	0.0204126	0.0157378	0.0843982	0.0126055	0.2266	0.179	1	0
ENSMUSG00000036199	Ndufa13	0.0204586	0.0160959	0.0711195	0.0126722	0.1442	0.1046	1	0
ENSMUSG00000038879	Nipal2	0.0205243	0.0152283	-0.0811373	0.0142257	0.2242	0.2778	1	0
ENSMUSG00000037656	Slc20a2	0.0205652	0.0347341	-0.0864864	0.019166	0.1704	0.2218	1	0
ENSMUSG00000028975	Pex14	0.020599	0.0229288	-0.0639666	0.0140049	0.1118	0.1574	1	0
ENSMUSG00000036158	Prickle1	0.020804	0.0301547	-0.104453	0.0261592	0.3768	0.449	1	0	SFARI					2	0
ENSMUSG00000024276	Zfp397	0.0208406	0.0281075	-0.0647326	0.0161263	0.0878	0.1286	1	0
ENSMUSG00000038160	Atg5	0.0210253	0.0113712	-0.0498687	0.00719621	0.0886	0.1262	1	0
ENSMUSG00000043531	Sorcs1	0.0210346	0.0214173	-0.115387	0.0311137	0.73	0.7806	1	0	EAGLE		Limited	0.25	Discordant
ENSMUSG00000032050	Rdx	0.0210473	0.03799	-0.0712709	0.0234324	0.0714	0.1182	1	0
ENSMUSG00000048076	Arf1	0.0210688	0.0215757	0.0672431	0.0129846	0.1846	0.138	1	0
ENSMUSG00000070000	Fcho1	0.0213165	0.0139203	0.0759157	0.0114101	0.225	0.177	1	0
ENSMUSG00000020135	Apc2	0.0213767	0.0190848	0.0599759	0.0121668	0.1134	0.077	1	0
ENSMUSG00000035614	Togaram1	0.0214052	0.0368657	-0.0839577	0.0241021	0.2758	0.339	1	0
ENSMUSG00000063663	Brwd3	0.0214115	0.00777137	-0.0734156	0.00626119	0.2974	0.3542	1	0	SFARI						1
ENSMUSG00000075700	Selenot	0.021555	0.0204651	-0.0574115	0.0132494	0.0974	0.1386	1	0
ENSMUSG00000041028	Ghitm	0.0216802	0.0268654	0.0713302	0.0137993	0.1574	0.1142	1	0
ENSMUSG00000022191	Drosha	0.0217944	0.018088	-0.0820172	0.0165614	0.2032	0.2544	1	0
ENSMUSG00000054237	Fra10ac1	0.0218522	0.0252197	-0.0533749	0.0150738	0.1046	0.1462	1	0
ENSMUSG00000073422	H2-Ke6	0.0219329	0.0399745	0.0604296	0.0188686	0.1152	0.0718	1	0
ENSMUSG00000052698	Tln2	0.0219688	0.0191129	-0.0918245	0.0139355	0.5848	0.64	1	0
ENSMUSG00000051951	Xkr4	0.0219755	0.0153892	-0.0816536	0.0108927	0.886	0.9256	1	0
ENSMUSG00000061244	Exoc5	0.0219819	0.022537	-0.0810083	0.0234275	0.3104	0.3718	1	0	SFARI					2	0
ENSMUSG00000035517	Tdrd7	0.0220315	0.0171805	-0.0670999	0.00829772	0.2378	0.2912	1	0
ENSMUSG00000021807	Rtraf	0.0220508	0.0354426	0.067718	0.0214152	0.1102	0.07	1	0
ENSMUSG00000020572	Nampt	0.0222036	0.028754	-0.0487265	0.0154716	0.0842	0.1254	1	0
ENSMUSG00000039828	Wdr70	0.0222321	0.0263596	-0.0738779	0.011595	0.2018	0.2538	1	0
ENSMUSG00000021373	Cap2	0.0223464	0.028378	-0.0844788	0.0212	0.5772	0.6554	1	0
ENSMUSG00000041935	AW549877	0.0223475	0.0278519	-0.0440161	0.0057712	0.0942	0.1356	1	0
ENSMUSG00000040537	Adam22	0.0225284	0.00834985	-0.0955126	0.00960187	0.7122	0.751	1	0
ENSMUSG00000056258	Kcnq3	0.022608	0.0301657	-0.105582	0.0351549	0.9048	0.932	1	0	SFARI;EAGLE;TADA	0.00084541	Moderate	11.1	Discordant	1	0
ENSMUSG00000032773	Chrm1	0.0226179	0.0219923	0.0729159	0.0118151	0.1824	0.1386	1	0
ENSMUSG00000065954	Tacc1	0.0226909	0.0249415	-0.0914433	0.0181031	0.4522	0.5082	1	0
ENSMUSG00000022052	Ppp2r2a	0.0228447	0.0132982	-0.0605988	0.0101723	0.7216	0.7814	1	0
ENSMUSG00000036501	Fam13b	0.0228937	0.0264714	-0.0728318	0.0212199	0.261	0.3232	1	0
ENSMUSG00000027475	Kif3b	0.0229988	0.0430501	-0.0702801	0.0146238	0.0936	0.1374	1	0
ENSMUSG00000020598	Nrcam	0.0230054	0.0230341	-0.099029	0.0216735	0.6248	0.6938	1	0	SFARI					2	0
ENSMUSG00000026914	Psmd14	0.0230564	0.0201779	-0.073329	0.0200405	0.4178	0.4856	1	0
ENSMUSG00000035232	Pdk3	0.0230753	0.0263507	-0.0640755	0.0168916	0.147	0.1992	1	0
ENSMUSG00000053877	Srcap	0.0233004	0.0145573	-0.0571821	0.009735	0.2078	0.261	1	0	SFARI					1	0
ENSMUSG00000034501	Pcnx4	0.0233888	0.0226828	-0.0588555	0.0145956	0.122	0.1676	1	0
ENSMUSG00000037788	Vopp1	0.0235341	0.017603	-0.0524794	0.00577272	0.1404	0.1852	1	0
ENSMUSG00000078870	Gm14410	0.0235935	0.0243052	-0.0507998	0.0122843	0.0788	0.1164	1	0
ENSMUSG00000061298	Agbl4	0.02365	0.0346526	-0.109804	0.0339018	0.4194	0.4826	1	0	SFARI					2	0
ENSMUSG00000062110	Scfd2	0.0236842	0.0271538	-0.072057	0.0243489	0.247	0.3076	1	0	SFARI					2	0
ENSMUSG00000079523	Tmsb10	0.0237611	0.0299501	0.0866408	0.0237243	0.1408	0.0964	1	0
ENSMUSG00000032420	Nt5e	0.0237937	0.0262503	-0.0836732	0.0117756	0.1666	0.215	1	0
ENSMUSG00000003814	Calr	0.0238433	0.0249992	0.109237	0.0137692	0.3092	0.2626	1	0
ENSMUSG00000110246	C130073E24Rik	0.0239348	0.0408305	0.121322	0.0293977	0.208	0.1564	1	0
ENSMUSG00000032826	Ank2	0.0240346	0.019642	-0.0830123	0.0123867	0.9458	0.9494	1	0	SFARI;EAGLE;TADA	0.00174365	Moderate	10.8	Discordant	1	0
ENSMUSG00000027303	Ptpra	0.0240503	0.0164576	-0.0747019	0.0130216	0.2996	0.3576	1	0
ENSMUSG00000030987	Stim1	0.0241304	0.0212454	-0.097358	0.0216148	0.2898	0.3466	1	0
ENSMUSG00000067925	Rtl8a	0.0243465	0.0375551	0.0833158	0.0143764	0.1698	0.1242	1	0
ENSMUSG00000061665	Cd2ap	0.0244109	0.015959	-0.0696178	0.00881794	0.37	0.4352	1	0
ENSMUSG00000028467	Gba2	0.0244159	0.0267865	0.0998739	0.0174623	0.2562	0.2078	1	0
ENSMUSG00000005506	Celf1	0.0245622	0.0358312	-0.103795	0.0278635	0.8106	0.8476	1	0
ENSMUSG00000035215	Lsm7	0.0245638	0.0259266	-0.0579426	0.0109634	0.143	0.1888	1	0
ENSMUSG00000001525	Tubb5	0.0245759	0.03146	0.0871613	0.0224172	0.1844	0.1388	1	0
ENSMUSG00000045248	Med26	0.0245869	0.0254188	-0.0535743	0.0104942	0.0754	0.1116	1	0
ENSMUSG00000021431	Snrnp48	0.0245992	0.0244298	-0.0702131	0.0181096	0.1612	0.2112	1	0
ENSMUSG00000049606	Zfp644	0.0246053	0.0302813	-0.081593	0.0174629	0.2004	0.2544	1	0
ENSMUSG00000026771	Spopl	0.0246055	0.0232875	-0.0688291	0.0173765	0.2278	0.2866	1	0
ENSMUSG00000036095	Dgkb	0.0246153	0.0173864	-0.0654875	0.00674822	1	1	1	0
ENSMUSG00000085396	Firre	0.0246154	0.0351237	-0.0713655	0.0190608	0.2582	0.3218	1	0
ENSMUSG00000037805	Rpl10a	0.0248126	0.0244368	0.0619268	0.0163401	0.167	0.1222	1	0
ENSMUSG00000030704	Rab6a	0.0250812	0.0224863	0.0994489	0.0118091	0.274	0.2286	1	0
ENSMUSG00000035640	Cbarp	0.025117	0.0303811	0.0769847	0.017468	0.2382	0.1884	1	0
ENSMUSG00000026116	Tmem131	0.0251468	0.0372233	-0.107593	0.0289974	0.3472	0.4104	1	0
ENSMUSG00000019775	Rgs17	0.0252667	0.02176	-0.0984176	0.0163043	0.4808	0.536	1	0
ENSMUSG00000045967	Gpr158	0.0252811	0.0495381	-0.103386	0.0353782	0.9676	0.9818	1	0
ENSMUSG00000042216	Sgsm1	0.0253097	0.0355554	-0.0747434	0.0197285	0.2108	0.2658	1	0
ENSMUSG00000057147	Dph6	0.0253321	0.0291004	-0.0947266	0.0278954	0.403	0.4658	1	0
ENSMUSG00000050783	Htr1f	0.0254016	0.0132497	-0.12584	0.0104867	0.1698	0.212	1	0
ENSMUSG00000039804	Ncoa5	0.0254108	0.0277567	-0.061839	0.0112832	0.1912	0.2422	1	0
ENSMUSG00000034858	Fam214a	0.0254327	0.0197159	-0.0604877	0.0132459	0.3924	0.4582	1	0
ENSMUSG00000028559	Osbpl9	0.0255146	0.0282682	-0.0764987	0.0287075	0.397	0.4686	1	0
ENSMUSG00000022890	Atp5j	0.0256264	0.0223004	0.118907	0.0276695	0.227	0.1792	1	0
ENSMUSG00000039852	Rere	0.0257298	0.0315534	-0.0903887	0.0186015	0.7374	0.782	1	0	SFARI;EAGLE		Moderate	6.5	Discordant	1	1
ENSMUSG00000054871	Tmem158	0.0258231	0.0193241	0.0980675	0.016206	0.3914	0.3382	1	0
ENSMUSG00000038473	Nos1ap	0.0258899	0.023413	-0.112132	0.0258415	0.5216	0.5828	1	0
ENSMUSG00000041112	Elmo1	0.0259644	0.0417146	-0.0714767	0.031144	0.7874	0.8508	1	0
ENSMUSG00000023826	Prkn	0.0259735	0.0179524	-0.088529	0.0192262	0.7606	0.8146	1	0	SFARI					2	0
ENSMUSG00000036104	Rab3gap1	0.0260074	0.0329587	-0.0897574	0.0254256	0.4664	0.5356	1	0
ENSMUSG00000047495	Dlgap2	0.0260538	0.0160587	-0.0830701	0.0195526	0.9918	0.9924	1	0	SFARI;EAGLE		Limited	2.8	Discordant	2	0
ENSMUSG00000063430	Wscd2	0.0260968	0.01877	-0.0875136	0.021745	0.2726	0.3264	1	0
ENSMUSG00000024357	Sil1	0.0262312	0.0320918	-0.0789994	0.0210357	0.2792	0.339	1	0
ENSMUSG00000028782	Adgrb2	0.0262465	0.0180669	0.0853741	0.00740543	0.291	0.2424	1	0
ENSMUSG00000039037	St6galnac5	0.0262964	0.0105865	-0.0934559	0.0181145	0.5056	0.562	1	0
ENSMUSG00000094410	Zbed6	0.0263843	0.0152744	-0.0534947	0.00986679	0.1578	0.2036	1	0
ENSMUSG00000084890	A830036E02Rik	0.0265059	0.0205729	-0.0433046	0.00864076	0.1098	0.1504	1	0
ENSMUSG00000049184	Purg	0.0266074	0.0422279	-0.0873888	0.0252734	0.2562	0.3194	1	0
ENSMUSG00000021224	Numb	0.0266126	0.0204157	-0.0735313	0.0146839	0.3664	0.4314	1	0
ENSMUSG00000062949	Atp11c	0.0266711	0.0337436	-0.0390976	0.0210403	0.2948	0.3634	1	0
ENSMUSG00000020333	Acsl6	0.026773	0.0255906	0.0887086	0.019358	0.2364	0.1874	1	0
ENSMUSG00000025925	Terf1	0.0268766	0.0217458	-0.0583865	0.00613661	0.0834	0.1192	1	0
ENSMUSG00000006731	B4galnt1	0.0269544	0.029498	0.0604236	0.0171215	0.1208	0.0814	1	0
ENSMUSG00000024109	Nrxn1	0.0270613	0.0377579	-0.0939982	0.0306557	0.9588	0.967	1	0	SFARI;EAGLE		Definitive	143.75	Concordant	1	0
ENSMUSG00000103428	Gm20754	0.0270784	0.0193751	-0.0659063	0.0282263	0.3988	0.4646	1	0
ENSMUSG00000085609	1700016P03Rik	0.0270808	0.0231467	0.168818	0.0238745	0.2622	0.2148	1	0
ENSMUSG00000029713	Gnb2	0.0271477	0.0270419	0.108672	0.0173068	0.4292	0.376	1	0	SFARI						1
ENSMUSG00000030064	Frmd4b	0.0272491	0.019193	-0.0949302	0.0104866	0.4734	0.533	1	0
ENSMUSG00000045215	Asxl3	0.0273072	0.0352002	-0.0606519	0.0153364	0.1	0.1412	1	0	SFARI;EAGLE;TADA	6.7e-11	Definitive	28.85	Concordant	1	1
ENSMUSG00000038248	Sobp	0.0273225	0.0201008	-0.0669076	0.00954134	0.0722	0.106	1	0
ENSMUSG00000025468	Caly	0.0274073	0.0329371	0.100276	0.0147189	0.3258	0.2716	1	0
ENSMUSG00000019428	Fkbp8	0.0274113	0.0231072	0.077088	0.0128047	0.1894	0.1462	1	0
ENSMUSG00000020580	Rock2	0.0274287	0.049908	-0.104889	0.0359553	0.6782	0.7478	1	0
ENSMUSG00000085845	Gm13944	0.0274368	0.0401713	-0.0511875	0.00679965	0.1328	0.1816	1	0
ENSMUSG00000022174	Dad1	0.027452	0.0266588	0.0804804	0.0178344	0.1794	0.1346	1	0
ENSMUSG00000064105	Cnnm2	0.0274768	0.0209663	-0.0726602	0.00989961	0.3344	0.396	1	0
ENSMUSG00000027506	Tpd52	0.0275468	0.0177978	-0.056057	0.0106634	0.1476	0.1922	1	0
ENSMUSG00000039131	Gipc2	0.0276529	0.0168455	-0.0783952	0.0127941	0.1488	0.1898	1	0
ENSMUSG00000034566	Atp5h	0.0277225	0.0155321	0.0813961	0.0177244	0.2088	0.1638	1	0
ENSMUSG00000056692	Ilrun	0.0277511	0.0134911	-0.039643	0.0053674	0.1068	0.1464	1	0
ENSMUSG00000024127	Prepl	0.0277796	0.0306756	-0.0627258	0.0147346	0.2866	0.3432	1	0
ENSMUSG00000071037	Camkmt	0.0277857	0.0273139	-0.0860874	0.0263861	0.4028	0.4684	1	0
ENSMUSG00000006057	Atp5g1	0.0278146	0.0192968	0.0892684	0.00459199	0.2072	0.1644	1	0
ENSMUSG00000038690	Atp5j2	0.027873	0.0336197	0.0869873	0.0105068	0.1622	0.1206	1	0
ENSMUSG00000053333	Dis3l2	0.0278861	0.0337508	-0.0774693	0.0245681	0.3714	0.4416	1	0
ENSMUSG00000035247	Hectd1	0.0281066	0.020833	-0.0660661	0.0104036	0.3294	0.3886	1	0
ENSMUSG00000042750	Bex2	0.0281405	0.0434506	0.0765708	0.0177769	0.188	0.1422	1	0
ENSMUSG00000027782	Kpna4	0.0281419	0.033512	-0.081823	0.0152915	0.2502	0.3076	1	0
ENSMUSG00000037894	H2az1	0.0281742	0.0207237	0.0715514	0.0114968	0.1852	0.143	1	0
ENSMUSG00000064210	Ano6	0.0283567	0.0470249	-0.0935668	0.0266495	0.3432	0.4036	1	0
ENSMUSG00000032827	Ppp1r9a	0.0283603	0.0182564	-0.065531	0.0141487	0.9522	0.9556	1	0
ENSMUSG00000052837	Junb	0.0285464	0.0268426	0.157843	0.0222382	0.2496	0.2044	1	0
ENSMUSG00000056185	Snx32	0.028592	0.0336846	0.101834	0.0215953	0.295	0.248	1	0
ENSMUSG00000019986	Ahi1	0.0288674	0.030264	-0.108194	0.0169282	0.8356	0.843	1	0	SFARI						1
ENSMUSG00000002010	Idh3g	0.028869	0.0297009	0.0655826	0.0166533	0.1746	0.131	1	0
ENSMUSG00000035623	Rsf1	0.0288922	0.0331033	-0.110757	0.0356909	0.4222	0.4926	1	0
ENSMUSG00000020738	Sumo2	0.0289258	0.0430531	-0.0598665	0.0196034	0.1418	0.1908	1	0
ENSMUSG00000021218	Gdi2	0.0290145	0.0333407	-0.0695865	0.0143106	0.1424	0.1876	1	0
ENSMUSG00000057060	Slc35f3	0.0290304	0.0517531	-0.107718	0.0433467	0.7102	0.7624	1	0
ENSMUSG00000058070	Eml1	0.0291557	0.0310378	-0.0758301	0.0236209	0.3666	0.4318	1	0
ENSMUSG00000058297	Spock2	0.0292521	0.0230367	0.0920283	0.0107016	0.331	0.2812	1	0
ENSMUSG00000054162	Spock3	0.0294513	0.0330314	-0.0823205	0.0136176	0.9936	0.9932	1	0
ENSMUSG00000003970	Rpl8	0.0294634	0.042899	0.0621994	0.00977905	0.1136	0.0784	1	0
ENSMUSG00000045671	Spred2	0.02955	0.0461163	-0.0971556	0.0250133	0.474	0.5342	1	0
ENSMUSG00000033065	Pfkm	0.0295752	0.0196865	0.0706159	0.0129763	0.2234	0.1764	1	0
ENSMUSG00000061603	Akap6	0.0296662	0.0237304	-0.0837969	0.0173211	0.9236	0.9348	1	0
ENSMUSG00000035382	Pcsk7	0.0297819	0.0384822	-0.0866202	0.0288299	0.2278	0.2846	1	0
ENSMUSG00000068039	Tcp1	0.0298725	0.0358432	0.0832327	0.0267294	0.2548	0.203	1	0
ENSMUSG00000024261	Syt4	0.0299746	0.0353827	0.106295	0.0345339	0.3546	0.2964	1	0
ENSMUSG00000042751	Nmnat2	0.0300805	0.0299221	-0.0669464	0.0343402	0.3578	0.4256	1	0
ENSMUSG00000041552	Ptchd1	0.030241	0.0303146	-0.0542161	0.0274912	0.1794	0.2332	1	0	SFARI;EAGLE		No scorable evidence	0	Discordant	1	0
ENSMUSG00000040952	Rps19	0.0302526	0.017951	0.0630114	0.00828636	0.1404	0.103	1	0
ENSMUSG00000029094	Afap1	0.0303112	0.053728	-0.0775343	0.0153493	0.1164	0.1604	1	0
ENSMUSG00000013997	Nit1	0.0303245	0.0591439	0.0930305	0.019219	0.2098	0.1582	1	0
ENSMUSG00000063531	Sema3e	0.0304122	0.0487279	-0.160317	0.0520344	0.4424	0.515	1	0
ENSMUSG00000021036	Sptlc2	0.0305634	0.0330766	-0.0575586	0.0097353	0.1174	0.1596	1	0
ENSMUSG00000020524	Gria1	0.0305752	0.0437586	-0.0760274	0.0226399	0.9544	0.959	1	0	SFARI					2	0
ENSMUSG00000078429	Ctdsp2	0.0306178	0.0153432	-0.0441771	0.0103836	0.1664	0.2134	1	0
ENSMUSG00000057182	Scn3a	0.0306658	0.0469487	-0.081445	0.0160542	0.7144	0.7792	1	0
ENSMUSG00000046329	Slc25a23	0.0306809	0.0293047	-0.0838075	0.0172011	0.2404	0.2924	1	0
ENSMUSG00000022105	Rb1	0.0306899	0.0326284	-0.0691867	0.0171683	0.2156	0.268	1	0
ENSMUSG00000028412	Slc44a1	0.0307256	0.0339688	-0.0671021	0.0224911	0.3262	0.39	1	0
ENSMUSG00000057738	Sptan1	0.030963	0.0389147	0.0948099	0.0247737	0.6358	0.5856	1	0
ENSMUSG00000037196	Pacrg	0.0310691	0.0391636	-0.0628358	0.0121027	0.116	0.158	1	0
ENSMUSG00000020790	Ankfy1	0.0310853	0.0217202	-0.0425017	0.00886462	0.221	0.2756	1	0
ENSMUSG00000037416	Dmxl1	0.0311934	0.0395593	-0.104229	0.0207488	0.6154	0.678	1	0
ENSMUSG00000012535	Tnpo3	0.03123	0.0481277	-0.0715757	0.0185639	0.2376	0.295	1	0	SFARI;TADA	0.0513369				3	0
ENSMUSG00000058546	Rpl23a	0.0312652	0.00802567	0.0627264	0.0048721	0.1334	0.0988	1	0
ENSMUSG00000037110	Ralgapa2	0.0312809	0.0177531	-0.0526436	0.0206491	0.5002	0.569	1	0
ENSMUSG00000072964	Bhlhb9	0.0313523	0.0313121	0.0941469	0.0162253	0.332	0.28	1	0
ENSMUSG00000037742	Eef1a1	0.0314932	0.0311603	0.115777	0.0320093	0.3976	0.3444	1	0
ENSMUSG00000035437	Rabgap1	0.0314937	0.0244578	-0.0693922	0.018332	0.5032	0.5748	1	0
ENSMUSG00000068740	Celsr2	0.0315166	0.0250721	0.0669276	0.0158327	0.1638	0.124	1	0
ENSMUSG00000015597	Zfp318	0.0315813	0.0167668	0.079267	0.00857524	0.2074	0.1656	1	0
ENSMUSG00000027963	Extl2	0.0316012	0.0263673	0.0573251	0.00918344	0.1576	0.1188	1	0
ENSMUSG00000020354	Sgcd	0.0316757	0.0321933	-0.12244	0.0165255	0.5824	0.6312	1	0
ENSMUSG00000090053	Pakap	0.0317017	0.0350404	-0.0630992	0.0154035	0.123	0.1662	1	0
ENSMUSG00000055866	Per2	0.0319471	0.0314072	-0.0729172	0.0151977	0.1666	0.213	1	0	SFARI;EAGLE		Moderate	6.75	Concordant	2	0
ENSMUSG00000051285	Pcmtd1	0.0320324	0.0442277	-0.096482	0.0213185	0.646	0.7206	1	0
ENSMUSG00000034040	Galnt17	0.0320818	0.0213163	-0.139189	0.0123758	0.565	0.6158	1	0
ENSMUSG00000032449	Slc25a36	0.0321496	0.0409728	-0.068199	0.0118518	0.2316	0.2852	1	0
ENSMUSG00000021079	Timm9	0.0321766	0.0408708	-0.0661564	0.0228887	0.209	0.2642	1	0
ENSMUSG00000057421	Las1l	0.0322826	0.0317572	0.0760966	0.021782	0.3358	0.2768	1	0	SFARI					3	0
ENSMUSG00000023010	Tmbim6	0.0323538	0.0358804	0.0701842	0.0175491	0.2024	0.1568	1	0
ENSMUSG00000034820	Cpsf7	0.032453	0.041699	-0.0650302	0.0280492	0.1624	0.2174	1	0	TADA	0.0252972
ENSMUSG00000010517	Faf1	0.032483	0.0320802	-0.0846052	0.0170715	0.6688	0.7346	1	0
ENSMUSG00000063296	Tmem117	0.03255	0.0576953	-0.108374	0.0263039	0.2766	0.3328	1	0
ENSMUSG00000037266	Rsrp1	0.0328549	0.0320614	-0.0694336	0.0159957	0.4638	0.5292	1	0
ENSMUSG00000033676	Gabrb3	0.0330715	0.0324725	-0.0722957	0.0249839	0.9768	0.99	1	0	SFARI					1	0
ENSMUSG00000041881	Ndufa7	0.0331196	0.0287228	0.0838781	0.0151907	0.1524	0.1136	1	0
ENSMUSG00000024085	Man2a1	0.0331403	0.0298491	-0.108019	0.0227266	0.479	0.5324	1	0
ENSMUSG00000051335	Gfod1	0.0331412	0.0521615	-0.0801364	0.0276892	0.3026	0.3624	1	0
ENSMUSG00000038372	Gmds	0.0334848	0.0414198	-0.10406	0.0301791	0.3006	0.3606	1	0
ENSMUSG00000055239	Kcmf1	0.0335478	0.0187315	-0.0486705	0.00878009	0.185	0.2318	1	0
ENSMUSG00000033352	Map2k4	0.0335954	0.0472156	-0.0710908	0.0103719	0.4244	0.4876	1	0
ENSMUSG00000034007	Scaper	0.0336791	0.0519209	-0.0775457	0.0319646	0.4446	0.512	1	0
ENSMUSG00000023452	Pisd	0.0338163	0.0483823	0.0625927	0.0113718	0.1212	0.084	1	0
ENSMUSG00000034402	Kcnh5	0.0339924	0.0373525	-0.104986	0.0173823	0.298	0.3466	1	0
ENSMUSG00000040548	Tex2	0.0341891	0.0458776	-0.0530847	0.0148408	0.1116	0.155	1	0
ENSMUSG00000021810	Ecd	0.0343265	0.0262429	-0.0527682	0.0155495	0.1032	0.1436	1	0
ENSMUSG00000034686	Prr7	0.0345894	0.0244851	0.0754079	0.0113859	0.2356	0.1914	1	0
ENSMUSG00000040586	Ofd1	0.0345982	0.0279791	-0.0538675	0.00859659	0.1004	0.1378	1	0	SFARI					2	0
ENSMUSG00000051650	B3gnt2	0.0346193	0.0196644	-0.0590386	0.0108398	0.0984	0.134	1	0
ENSMUSG00000047368	Abhd17b	0.0347207	0.0309268	-0.052655	0.0083116	0.1452	0.1886	1	0
ENSMUSG00000024908	Ppp6r3	0.0350775	0.0377799	-0.0669031	0.0194767	0.274	0.33	1	0
ENSMUSG00000030930	Chst15	0.03513	0.0433827	0.0586008	0.0140973	0.1302	0.0908	1	0
ENSMUSG00000113216	Gm40841	0.0352098	0.0261836	-0.0713523	0.0127659	0.2434	0.2964	1	0
ENSMUSG00000031608	Galnt7	0.0354112	0.0344047	-0.0907965	0.0125906	0.2522	0.302	1	0
ENSMUSG00000035227	Spcs2	0.0354246	0.0157307	0.0593764	0.00790506	0.1548	0.1178	1	0
ENSMUSG00000022228	Zscan26	0.0358548	0.0352735	-0.0665529	0.0201185	0.2056	0.2566	1	0
ENSMUSG00000038774	Ascc3	0.0358745	0.0359728	-0.0781748	0.0173671	0.6036	0.6664	1	0
ENSMUSG00000031327	Chic1	0.0359842	0.0559347	-0.0885635	0.0243236	0.2094	0.2578	1	0
ENSMUSG00000021140	Pcnx	0.0361567	0.0608959	-0.0683351	0.0209776	0.4248	0.4904	1	0
ENSMUSG00000042439	Zfp532	0.036171	0.0508354	-0.0735426	0.0207575	0.2556	0.3126	1	0
ENSMUSG00000111068	Gm35501	0.0363541	0.0532065	-0.0714067	0.0120993	0.079	0.1128	1	0
ENSMUSG00000003363	Pld3	0.0363679	0.0197198	0.117997	0.00883533	0.4174	0.3736	1	0
ENSMUSG00000040565	Btaf1	0.0368575	0.0349544	-0.113657	0.0294904	0.5856	0.6376	1	0	SFARI					2	0
ENSMUSG00000029093	Sorcs2	0.0368777	0.0544101	-0.0830176	0.0229059	0.5996	0.652	1	0
ENSMUSG00000003518	Dusp3	0.0369906	0.0619114	-0.0711929	0.0186172	0.1296	0.1724	1	0
ENSMUSG00000016664	Pacsin2	0.0371703	0.0319596	-0.0485237	0.00728612	0.0758	0.108	1	0
ENSMUSG00000024120	Lrpprc	0.0373273	0.0422758	-0.0740067	0.00971896	0.2884	0.3388	1	0
ENSMUSG00000044250	Pced1b	0.0373837	0.0550052	-0.0626015	0.0223481	0.121	0.1664	1	0
ENSMUSG00000029563	Foxp2	0.0376733	0.0378762	0.144562	0.0234429	0.4904	0.4526	1	0	SFARI					1	0
ENSMUSG00000024639	Gnaq	0.0379077	0.0690094	-0.0823204	0.0332457	0.4904	0.5684	1	0
ENSMUSG00000021596	Mctp1	0.0379348	0.0473925	-0.1208	0.0295745	0.8924	0.9226	1	0
ENSMUSG00000030774	Pak1	0.0380048	0.0286656	-0.0585119	0.00932149	0.1176	0.156	1	0	SFARI						1
ENSMUSG00000026004	Kansl1l	0.0380977	0.0280472	-0.0592593	0.0183689	0.4478	0.5152	1	0
ENSMUSG00000038351	Sgsm2	0.0382394	0.0311211	0.0940685	0.00929587	0.373	0.3222	1	0
ENSMUSG00000035919	Bbs9	0.0387156	0.036421	-0.0858393	0.0252226	0.3188	0.3706	1	0
ENSMUSG00000041353	Tmem29	0.0387536	0.028301	-0.0499905	0.0107195	0.1434	0.1854	1	0
ENSMUSG00000040339	Fam102b	0.0390682	0.0531915	-0.0698086	0.0142926	0.2576	0.3092	1	0
ENSMUSG00000060923	Acyp2	0.039199	0.0183895	-0.0654126	0.0133121	0.3554	0.4102	1	0
ENSMUSG00000019978	Epb41l2	0.0392201	0.0413714	-0.0665426	0.0106818	0.1876	0.2344	1	0
ENSMUSG00000043241	Upf2	0.0392765	0.0346081	-0.0748986	0.015949	0.3296	0.386	1	0	SFARI					2	0
ENSMUSG00000017843	Ppp2r5c	0.0396247	0.0146223	-0.0613685	0.00803306	0.3638	0.4254	1	0
ENSMUSG00000041570	Camsap2	0.039766	0.0610761	-0.052473	0.0227767	0.294	0.3558	1	0
ENSMUSG00000016933	Plcg1	0.0397963	0.0495116	0.0846093	0.0162266	0.227	0.1808	1	0
ENSMUSG00000063145	Bbs5	0.0398073	0.0163623	-0.054229	0.00724892	0.1578	0.1992	1	0
ENSMUSG00000012126	Ubxn11	0.0398506	0.0434467	-0.0554568	0.0116569	0.1004	0.138	1	0
ENSMUSG00000026155	Smap1	0.0401991	0.0634988	-0.0711091	0.0280435	0.2708	0.3302	1	0
ENSMUSG00000022948	Setd4	0.0402965	0.0367962	-0.0720131	0.0158305	0.2158	0.2656	1	0
ENSMUSG00000058248	Kcnh1	0.0404229	0.0282864	-0.101284	0.040772	0.4076	0.4594	1	0
ENSMUSG00000019726	Lyst	0.0405498	0.0255236	-0.0727204	0.0177396	0.6234	0.6752	1	0
ENSMUSG00000020435	Osbp2	0.0407057	0.0226276	-0.073693	0.0115255	0.6248	0.6804	1	0
ENSMUSG00000087086	Gm13269	0.0407659	0.0364677	-0.0801626	0.0250852	0.5464	0.6244	1	0
ENSMUSG00000036890	Gtdc1	0.0408535	0.0358255	-0.0753447	0.0284737	0.2966	0.3556	1	0
ENSMUSG00000043716	Rpl7	0.0408648	0.024995	0.0523861	0.0113794	0.1192	0.0866	1	0
ENSMUSG00000026839	Upp2	0.0408942	0.0759474	-0.0720379	0.0217225	0.3372	0.4026	1	0
ENSMUSG00000050071	Bex1	0.0410245	0.0419271	0.0485889	0.0117114	0.1236	0.0884	1	0
ENSMUSG00000026360	Rgs2	0.0411133	0.0567278	0.115996	0.0311498	0.316	0.266	1	0
ENSMUSG00000060843	Ctnna3	0.0411608	0.0712172	-0.0956757	0.0277285	0.8408	0.8576	1	0	SFARI					2	0
ENSMUSG00000020151	Ptprr	0.0412595	0.043296	-0.0589077	0.0103052	0.1888	0.2376	1	0
ENSMUSG00000040606	Kazn	0.0413865	0.076306	-0.092466	0.0267529	0.902	0.939	1	0
ENSMUSG00000109372	Gm19410	0.0415014	0.0325066	-0.070773	0.0254167	0.278	0.3318	1	0
ENSMUSG00000072294	Klf12	0.0416803	0.0325666	-0.0900628	0.0235454	0.454	0.5064	1	0
ENSMUSG00000031563	Wwc2	0.0418246	0.0400198	-0.060412	0.0116493	0.1066	0.1446	1	0
ENSMUSG00000035933	Cog5	0.0419551	0.0478942	-0.0738663	0.0305142	0.3872	0.441	1	0
ENSMUSG00000032504	Pdcd6ip	0.0421174	0.0406764	-0.0567397	0.0122654	0.1174	0.1564	1	0
ENSMUSG00000056268	Dennd1b	0.0421819	0.0281384	-0.0740212	0.0181187	0.382	0.4308	1	0
ENSMUSG00000028797	Tmem234	0.0423507	0.0381927	-0.0646308	0.0144847	0.2202	0.2676	1	0
ENSMUSG00000024346	Pfdn1	0.042393	0.0518009	-0.0580967	0.0204174	0.1382	0.1826	1	0
ENSMUSG00000032560	Dnajc13	0.0424053	0.0170471	-0.0675512	0.00429319	0.3056	0.3538	1	0
ENSMUSG00000042298	Ttc19	0.0424099	0.0207205	-0.0673803	0.0160048	0.4242	0.4832	1	0
ENSMUSG00000031012	Cask	0.0425235	0.0584526	-0.0950433	0.0251175	0.4546	0.5142	1	0	SFARI					1	0
ENSMUSG00000062647	Rpl7a	0.0425653	0.0508847	0.0665497	0.00962564	0.1388	0.1034	1	0
ENSMUSG00000047215	Rpl9	0.0425821	0.062521	0.0678764	0.0145978	0.1896	0.1458	1	0
ENSMUSG00000038717	Atp5l	0.0427203	0.0278157	0.0520587	0.0101802	0.1652	0.1268	1	0
ENSMUSG00000036529	Sbf1	0.0430235	0.0514143	0.0701595	0.0142542	0.2486	0.2024	1	0	SFARI					2	0
ENSMUSG00000031442	Mcf2l	0.0431323	0.0343568	0.123959	0.0201823	0.47	0.4348	1	0
ENSMUSG00000048895	Cdk5r1	0.0431387	0.0231049	0.0825075	0.0129983	0.201	0.1616	1	0
ENSMUSG00000021520	Uqcrb	0.0431685	0.0108688	0.0464881	0.00670941	0.1262	0.0938	1	0
ENSMUSG00000029776	Hibadh	0.0432533	0.086762	-0.0770805	0.0198092	0.203	0.261	1	0
ENSMUSG00000037351	Actr1b	0.0435333	0.0468933	0.0876748	0.0191965	0.3078	0.2606	1	0
ENSMUSG00000022476	Polr3h	0.0435575	0.0543349	-0.0594214	0.0127802	0.1378	0.1786	1	0
ENSMUSG00000009927	Rps25	0.0435743	0.0649122	0.0790965	0.0128746	0.1572	0.1194	1	0
ENSMUSG00000018476	Kdm6b	0.043599	0.0367866	0.0656854	0.00940554	0.1268	0.093	1	0	SFARI;EAGLE;TADA	0.00038344	Definitive	13.75	Concordant	1	0
ENSMUSG00000024843	Chka	0.0436014	0.077096	-0.0727495	0.0232376	0.3878	0.4554	1	0
ENSMUSG00000086433	Rsf1os1	0.0437668	0.061283	-0.0520462	0.0153599	0.1184	0.1604	1	0
ENSMUSG00000022685	Parn	0.0438988	0.0452958	-0.0495873	0.0176021	0.184	0.2326	1	0
ENSMUSG00000027797	Dclk1	0.0439138	0.0457139	-0.0834871	0.0186808	0.9196	0.9364	1	0
ENSMUSG00000026860	Sh3glb2	0.0441258	0.0607876	0.0620715	0.022757	0.201	0.1558	1	0
ENSMUSG00000028221	Pip4p2	0.0441844	0.0615444	-0.0823745	0.0295782	0.196	0.2488	1	0
ENSMUSG00000012422	Tmem167	0.0444143	0.0104892	-0.0534714	0.0060282	0.194	0.2382	1	0
ENSMUSG00000089832	Shkbp1	0.0445074	0.0532471	0.0574562	0.0128622	0.1418	0.1042	1	0
ENSMUSG00000028086	Fbxw7	0.0445651	0.0477405	-0.0710555	0.018662	0.4134	0.4758	1	0
ENSMUSG00000019813	Cep57l1	0.0445746	0.0452811	-0.0576117	0.0199967	0.1274	0.17	1	0
ENSMUSG00000039753	Fbxl5	0.0446048	0.0572093	-0.0747238	0.0286756	0.4122	0.4798	1	0
ENSMUSG00000007411	Mark3	0.0448673	0.0702614	-0.0821201	0.0212899	0.5278	0.5922	1	0
ENSMUSG00000032657	Fam189b	0.0449093	0.0228828	0.0773575	0.00732552	0.1824	0.1456	1	0
ENSMUSG00000053347	Zfp943	0.0450553	0.0392461	-0.0589039	0.022288	0.2102	0.262	1	0
ENSMUSG00000024736	Tmem132a	0.045192	0.0319969	0.0612123	0.0112108	0.232	0.1888	1	0
ENSMUSG00000053141	Ptprt	0.0452009	0.0276132	-0.0712226	0.0296358	0.3164	0.3736	1	0	SFARI					2	0
ENSMUSG00000022076	Klhl1	0.0452782	0.0273657	-0.114154	0.0191689	0.4442	0.493	1	0
ENSMUSG00000020564	Atxn7l1	0.0453924	0.0292522	-0.0555929	0.0101244	0.2812	0.3326	1	0
ENSMUSG00000036403	Cep135	0.0454032	0.0559636	0.0611074	0.017863	0.153	0.1112	1	0	SFARI					2	0
ENSMUSG00000028399	Ptprd	0.0454614	0.0262759	-0.0649918	0.00862553	0.9966	0.999	1	0
ENSMUSG00000033569	Adgrb3	0.0455809	0.0580375	0.0505001	0.0115234	1	1	1	0
ENSMUSG00000032186	Tmod2	0.0456162	0.0396388	-0.0880703	0.0205829	0.3132	0.3638	1	0
ENSMUSG00000000563	Atp5pb	0.0456458	0.0454262	0.113766	0.0168278	0.307	0.2656	1	0
ENSMUSG00000029054	Gabrd	0.0456601	0.0722637	0.0697898	0.0120315	0.4194	0.3568	1	0
ENSMUSG00000059142	Zfp945	0.0456983	0.0588963	-0.0652416	0.0125531	0.137	0.1774	1	0
ENSMUSG00000027201	Myef2	0.0457228	0.0498489	-0.0683193	0.022827	0.5576	0.6168	1	0
ENSMUSG00000024566	Atp9b	0.0457428	0.059605	-0.0769987	0.019481	0.433	0.4876	1	0
ENSMUSG00000035649	Zcchc7	0.0459834	0.0325702	-0.0602881	0.0166413	0.8768	0.9048	1	0
ENSMUSG00000066892	Fbxl12	0.0461342	0.0725748	-0.0422161	0.0143653	0.095	0.133	1	0
ENSMUSG00000024211	Grm8	0.0462328	0.0423559	-0.129507	0.0234021	0.2764	0.3284	1	0
ENSMUSG00000021973	Micu2	0.0464655	0.0314793	-0.0478308	0.0124919	0.1454	0.1874	1	0
ENSMUSG00000033083	Tbc1d4	0.0465333	0.0199492	-0.075818	0.017999	0.2102	0.251	1	0
ENSMUSG00000021114	Atp6v1d	0.0465915	0.0320801	0.0892557	0.00649844	0.28	0.2382	1	0
ENSMUSG00000066057	Gm1976	0.0467176	0.0229325	-0.0628503	0.00543597	0.2882	0.3378	1	0
ENSMUSG00000038910	Plcl2	0.0468748	0.0528569	-0.0786603	0.0287257	0.808	0.8518	1	0
ENSMUSG00000028883	Sema3a	0.0469073	0.0310334	-0.066766	0.0299117	0.2864	0.3348	1	0
ENSMUSG00000071072	Ptges3	0.0469367	0.0347974	-0.0380443	0.0146271	0.1164	0.1552	1	0
ENSMUSG00000016349	Eef1a2	0.0471034	0.0491553	0.0970603	0.0198402	0.233	0.1896	1	0	SFARI						1
ENSMUSG00000006932	Ctnnb1	0.0471271	0.0475113	0.0728315	0.0167122	0.2314	0.186	1	0	SFARI;EAGLE;TADA	5.54e-05	Definitive	32.75	Concordant	1	0
ENSMUSG00000044894	Uqcrq	0.0473503	0.0627317	0.0717998	0.0187023	0.159	0.1218	1	0
ENSMUSG00000031561	Tenm3	0.0476136	0.0566678	0.184239	0.0194167	0.7164	0.69	1	0
ENSMUSG00000030682	Cdipt	0.0477804	0.033827	0.048242	0.0114738	0.1162	0.0832	1	0
ENSMUSG00000003279	Dlgap1	0.0477835	0.0619454	-0.110116	0.0424828	0.8226	0.8682	1	0	SFARI					2	0
ENSMUSG00000050640	Tmem150c	0.0477905	0.0642344	-0.0536582	0.0130075	0.1032	0.141	1	0
ENSMUSG00000048758	Rpl29	0.0478261	0.0525019	0.0590958	0.00966916	0.1568	0.1194	1	0
ENSMUSG00000038533	Cbfa2t2	0.0478815	0.063691	-0.0721392	0.024434	0.3102	0.3658	1	0
ENSMUSG00000003992	Ssbp2	0.0478963	0.0268245	-0.0518234	0.0117391	0.8994	0.9262	1	0
ENSMUSG00000063873	Slc24a3	0.0480932	0.0314168	-0.0737056	0.00888024	0.1506	0.1892	1	0
ENSMUSG00000024068	Spast	0.0480951	0.0267741	-0.055459	0.00609835	0.119	0.1542	1	0	SFARI;EAGLE		Moderate	8.1	Discordant	1	0
ENSMUSG00000033610	Pank1	0.0484106	0.0467418	-0.0587762	0.0132325	0.1056	0.1406	1	0
ENSMUSG00000030410	Dmwd	0.0485725	0.0276222	0.059682	0.0046204	0.1272	0.0942	1	0	SFARI;TADA	0.00413177				2	0
ENSMUSG00000059291	Rpl11	0.0486009	0.0721117	0.0781671	0.0161706	0.1514	0.1128	1	0
ENSMUSG00000026455	Klhl12	0.048645	0.0536177	-0.0588739	0.0139254	0.1104	0.1482	1	0
ENSMUSG00000057522	Spop	0.0486671	0.0371004	-0.0717298	0.0235948	0.3206	0.3782	1	0
ENSMUSG00000032518	Rpsa	0.048678	0.0326935	0.076569	0.0086309	0.2108	0.1712	1	0
ENSMUSG00000020740	Gga3	0.0486874	0.0275666	0.0512091	0.00843165	0.1882	0.1492	1	0
ENSMUSG00000030020	Prickle2	0.0488858	0.0669204	-0.0879632	0.0290842	0.4406	0.4912	1	0	SFARI					2	0
ENSMUSG00000058690	Ccser2	0.0488988	0.0907284	-0.0874478	0.0319392	0.2306	0.2868	1	0
ENSMUSG00000026888	Grb14	0.0489634	0.0262483	-0.0485205	0.00561866	0.0908	0.1232	1	0
ENSMUSG00000025323	Sp4	0.0491227	0.0393403	-0.065389	0.0174324	0.2018	0.2474	1	0
ENSMUSG00000027879	Sec22b	0.0491913	0.0412227	-0.0475835	0.00582098	0.0844	0.1156	1	0
ENSMUSG00000034761	Map4k5	0.0492666	0.0700206	-0.0497572	0.024524	0.314	0.378	1	0
ENSMUSG00000015709	Arnt2	0.0493241	0.0883751	-0.102513	0.0200283	0.1924	0.2382	1	0	SFARI					2	0
ENSMUSG00000036550	Cnot1	0.0494837	0.0253829	-0.0518392	0.00517314	0.4046	0.4626	1	0	SFARI					2	0
ENSMUSG00000071341	Egr4	0.0494875	0.0553697	0.0700579	0.0182092	0.1666	0.1268	1	0
ENSMUSG00000021710	Nln	0.0495801	0.0243443	-0.0614297	0.00698839	0.1128	0.1466	1	0
ENSMUSG00000047921	Trappc9	0.0497529	0.0764942	-0.0765277	0.027549	0.2534	0.3118	1	0	SFARI					2	0
ENSMUSG00000000538	Tom1l2	0.0498583	0.0767958	-0.052942	0.0309397	0.3712	0.4416	1	0
ENSMUSG00000085222	Gm13974	0.0499336	0.0416395	-0.0904916	0.019525	0.3566	0.4072	1	0
ENSMUSG00000035726	Supt16	0.0499748	0.054363	-0.0786203	0.0241511	0.1676	0.2108	1	0	SFARI					2	1
ENSMUSG00000040325	Dcaf1	0.0499782	0.0519383	-0.0675163	0.0210063	0.2538	0.3046	1	0

## Sheet: Ecc_MSN
ensembl	gene	p_val.mean	p_val.std	avg_log2FC.mean	avg_log2FC.std	pct.1.mean	pct.2.mean	padj.mean	padj.std	ASD.status	TADA.FDR	EAGLE.annotation	EAGLE.score	EAGLE.concordance	SFARI.score	SFARI.syndromic
ENSMUSG00000020719	Ddx5	9.30733e-05	0.000132008	0.370193	0.0569092	0.958667	0.924333	0.689738	0.425956
ENSMUSG00000063511	Snrnp70	0.00017086	0.000198547	0.339089	0.0113045	0.843667	0.735667	0.972764	0.066714
ENSMUSG00000019039	Dalrd3	0.00025155	0.000250998	0.4697	0.0493454	0.529333	0.361833	0.711186	0.44753
ENSMUSG00000062054	Iah1	0.000374134	0.000476752	-0.142559	0.012882	0.0255	0.1335	0.923837	0.186562
ENSMUSG00000022748	Cmss1	0.000374823	0.000868973	0.420593	0.0621134	0.922333	0.8095	0.4585	0.447083
ENSMUSG00000098973	Mir6236	0.000500912	0.000915745	0.42935	0.0277434	0.911833	0.831667	0.960137	0.0976438
ENSMUSG00000092341	Malat1	0.000606412	0.000798681	-0.206966	0.0196914	1	1	1	0
ENSMUSG00000007892	Rplp1	0.000876982	0.00163773	0.377179	0.0268418	0.3305	0.178	1	0
ENSMUSG00000020435	Osbp2	0.000885005	0.00111435	-0.281881	0.047506	0.2415	0.4385	0.856524	0.351444
ENSMUSG00000001270	Ckb	0.00122762	0.00206185	0.400913	0.0652075	0.754833	0.605333	0.938928	0.149595
ENSMUSG00000004031	Brinp2	0.00129019	0.00109585	-0.315146	0.0510586	0.424333	0.609833	0.945056	0.134584
ENSMUSG00000004207	Psap	0.00183365	0.00199928	0.346541	0.0549621	0.434833	0.283	1	0
ENSMUSG00000039278	Pcsk1n	0.00192048	0.00336503	0.486013	0.0665546	0.494333	0.344833	0.994736	0.0128943
ENSMUSG00000020246	Hcfc2	0.00227797	0.00202364	-0.156396	0.0227474	0.0538333	0.158167	1	0
ENSMUSG00000036890	Gtdc1	0.00270269	0.00151029	-0.239535	0.0382845	0.181	0.327833	1	0
ENSMUSG00000024121	Atp6v0c	0.0029187	0.00567498	0.426196	0.0819125	0.498	0.36	0.902414	0.239035
ENSMUSG00000021254	Gpatch2l	0.00316417	0.00154885	-0.143612	0.017602	0.0433333	0.1335	1	0
ENSMUSG00000102869	Norad	0.00323162	0.00424909	0.237186	0.030803	0.2245	0.101667	1	0
ENSMUSG00000039218	Srrm2	0.00326799	0.00423427	0.296011	0.0486509	0.86	0.7925	1	0	SFARI					2	1
ENSMUSG00000037622	Wdtc1	0.00386565	0.00360105	-0.162452	0.0249066	0.0455	0.138167	1	0
ENSMUSG00000055932	Fto	0.00401424	0.00473784	-0.196605	0.0385314	0.326	0.5105	1	0
ENSMUSG00000025579	Gaa	0.00409565	0.00572306	0.256828	0.024507	0.252667	0.126833	1	0
ENSMUSG00000106515	Gm30382	0.00418141	0.00538694	-0.219055	0.0548236	0.0488	0.1582	0.963359	0.0819309
ENSMUSG00000029673	Auts2	0.00445188	0.00710969	-0.234677	0.0338762	0.998	1	0.953978	0.11273	SFARI;EAGLE;TADA	0.0046251	Definitive	35.5	Concordant	1	0
ENSMUSG00000041058	Wwp1	0.00473531	0.0091749	-0.309167	0.0468268	0.169667	0.3125	1	0	SFARI					3	0
ENSMUSG00000034297	Med13	0.00479627	0.00528075	-0.243636	0.050269	0.318167	0.501167	0.958006	0.102864	SFARI;EAGLE;TADA	0.00013387	Moderate	9.3	Discordant	1	1
ENSMUSG00000029822	Osbpl3	0.00490292	0.00552175	-0.262114	0.0436038	0.172333	0.306667	1	0
ENSMUSG00000039474	Wfs1	0.00491988	0.00848427	0.227221	0.0436959	0.210333	0.0901667	1	0
ENSMUSG00000027722	Spata5	0.00499647	0.00375649	-0.20105	0.0229966	0.187333	0.319167	1	0
ENSMUSG00000026223	Itm2c	0.00517683	0.00557928	0.399376	0.0616451	0.5275	0.390167	1	0
ENSMUSG00000054162	Spock3	0.00562998	0.00490436	-0.370014	0.0437455	0.809667	0.851333	1	0
ENSMUSG00000031327	Chic1	0.00580185	0.00371423	-0.163987	0.0184646	0.1035	0.215833	1	0
ENSMUSG00000036333	Kidins220	0.00602441	0.0118376	0.622919	0.0634149	0.729167	0.660167	1	0
ENSMUSG00000061859	Patj	0.00610609	0.00362137	-0.214539	0.0303633	0.154333	0.274667	1	0	SFARI					2	0
ENSMUSG00000031605	Klhl2	0.00656878	0.0134137	-0.330129	0.0894827	0.243333	0.414667	0.73532	0.426086
ENSMUSG00000039153	Runx2	0.00691127	0.0126079	-0.332703	0.0534297	0.2735	0.411833	1	0
ENSMUSG00000024135	Srbd1	0.00725365	0.00976968	-0.144096	0.0342539	0.108167	0.2275	1	0
ENSMUSG00000059586	Nsmce2	0.0072875	0.00588099	-0.184149	0.0230429	0.218	0.358	1	0
ENSMUSG00000038910	Plcl2	0.00789477	0.0025487	-0.211812	0.0324803	0.736833	0.817333	1	0
ENSMUSG00000074165	Zfp788	0.0079274	0.00563667	-0.148968	0.0171438	0.0528333	0.136167	1	0
ENSMUSG00000020255	Nopchap1	0.0081609	0.00845703	-0.192433	0.0415286	0.161833	0.283	1	0
ENSMUSG00000037253	Mex3c	0.00823445	0.00692066	-0.137964	0.0156925	0.043	0.1262	1	0
ENSMUSG00000029676	Pot1a	0.00877573	0.00520094	-0.132524	0.0200405	0.0511667	0.1345	1	0	SFARI					2	0
ENSMUSG00000039210	Gpatch2	0.00893109	0.0123861	-0.156328	0.0315371	0.0833333	0.192333	1	0
ENSMUSG00000020863	Luc7l3	0.00940165	0.00789907	-0.149962	0.0386605	0.391	0.573833	1	0
ENSMUSG00000027822	Slc33a1	0.00946794	0.0108318	-0.12529	0.0467426	0.0653333	0.170333	1	0
ENSMUSG00000056073	Grik2	0.00954293	0.0105427	-0.255787	0.0514948	1	0.9895	1	0	SFARI					2	0
ENSMUSG00000002459	Rgs20	0.00967332	0.0127504	-0.255776	0.0457099	0.278167	0.421333	1	0
ENSMUSG00000019990	Pde7b	0.00972834	0.00850093	-0.347351	0.127379	0.765	0.825	0.84183	0.387435
ENSMUSG00000021087	Rtn1	0.00986612	0.00763739	0.277996	0.0257041	0.947	0.8995	1	0
ENSMUSG00000040591	1110051M20Rik	0.00990777	0.00924466	-0.179072	0.0480234	0.289667	0.446	1	0
ENSMUSG00000057329	Bcl2	0.0101944	0.00592874	-0.202415	0.0216241	0.140167	0.25	1	0
ENSMUSG00000054309	Cpsf3	0.0108477	0.0114743	-0.109498	0.0279348	0.0445	0.126833	1	0
ENSMUSG00000015656	Hspa8	0.0109231	0.0245597	0.340634	0.0746931	0.387333	0.228333	1	0
ENSMUSG00000032238	Rora	0.0109595	0.0202704	-0.318224	0.0624074	0.951	0.9575	0.995342	0.0114103	SFARI						1
ENSMUSG00000021635	Rad17	0.0110685	0.0149852	-0.158573	0.0335613	0.0748333	0.175167	1	0
ENSMUSG00000024622	Hmgxb3	0.0114516	0.0217559	-0.151406	0.0229392	0.0758333	0.181667	1	0
ENSMUSG00000021945	Zmym2	0.0121931	0.00656052	-0.234367	0.0312359	0.3785	0.519	1	0	SFARI					2	1
ENSMUSG00000041078	Grid1	0.012253	0.00705603	-0.218304	0.0385	0.912	0.943333	1	0	SFARI					2	0
ENSMUSG00000030695	Aldoa	0.0122791	0.0109714	0.255581	0.0604703	0.314167	0.196167	1	0
ENSMUSG00000021268	Meg3	0.0128511	0.016222	0.158581	0.0281125	1	1	1	0
ENSMUSG00000113216	Gm40841	0.0129457	0.0188967	-0.258488	0.0630163	0.340167	0.479333	1	0
ENSMUSG00000020300	Cpeb4	0.0129756	0.0175013	-0.185888	0.0516678	0.302	0.472667	1	0	SFARI					2	0
ENSMUSG00000020124	Usp15	0.0129784	0.0185249	-0.163429	0.0531106	0.288	0.457333	1	0	SFARI					2	0
ENSMUSG00000087231	E230016M11Rik	0.0129972	0.0102051	-0.131414	0.0242818	0.041	0.1138	1	0
ENSMUSG00000046364	Rpl27a	0.0135812	0.0174153	0.198355	0.0246844	0.1465	0.0605	1	0
ENSMUSG00000046169	Adamts6	0.0144937	0.0133899	-0.199813	0.0270415	0.0565	0.137167	1	0
ENSMUSG00000101609	Kcnq1ot1	0.0145949	0.0123821	-0.221608	0.0181117	0.313333	0.447833	1	0
ENSMUSG00000022000	Zc3h13	0.0146882	0.0237843	-0.184996	0.0534653	0.206667	0.348333	1	0
ENSMUSG00000046311	Zfp62	0.0147901	0.00670517	-0.137747	0.0153782	0.0568	0.134	1	0
ENSMUSG00000064115	Cadm2	0.0148695	0.030913	-0.2394	0.0683602	1	1	1	0	SFARI					2	0
ENSMUSG00000111950	Gm48893	0.0149457	0.023485	-0.190918	0.0486613	0.172333	0.301167	1	0
ENSMUSG00000070858	Gm1673	0.015051	0.0131047	0.0943226	0.0214221	0.1114	0.0384	1	0
ENSMUSG00000027499	Pkia	0.0156336	0.0133154	-0.238175	0.0420849	0.3335	0.4755	1	0
ENSMUSG00000054434	Tmem120b	0.0160125	0.0069913	-0.112963	0.0162039	0.0443333	0.1155	1	0
ENSMUSG00000000085	Scmh1	0.0161508	0.0342082	-0.248035	0.0684258	0.4235	0.5795	1	0
ENSMUSG00000021838	Samd4	0.0162427	0.00994693	-0.219415	0.0590951	0.163833	0.282167	1	0
ENSMUSG00000024127	Prepl	0.0166047	0.0195709	-0.154775	0.0389875	0.261333	0.406167	1	0
ENSMUSG00000022197	Pdzd2	0.0168717	0.0203335	-0.269599	0.0478429	0.157167	0.271667	1	0
ENSMUSG00000028360	Slc44a5	0.0168738	0.0288072	-0.321018	0.108828	0.364667	0.5455	0.878171	0.298418
ENSMUSG00000051331	Cacna1c	0.0169677	0.020623	-0.183259	0.0492232	0.982	0.970667	1	0	SFARI					1	1
ENSMUSG00000022983	Scaf4	0.0171337	0.0106653	-0.164812	0.0396503	0.1895	0.304	1	0	SFARI					2	0
ENSMUSG00000026576	Atp1b1	0.0171551	0.0157193	0.344744	0.0419491	0.745333	0.702833	1	0
ENSMUSG00000071528	Atp5md	0.0172338	0.0211542	0.197223	0.036316	0.201833	0.1025	1	0
ENSMUSG00000097545	Mir124a-1hg	0.017321	0.0182144	0.245044	0.0712383	0.684667	0.622167	1	0
ENSMUSG00000041935	AW549877	0.0174216	0.0160655	-0.111944	0.0191649	0.0445	0.122	1	0
ENSMUSG00000063887	Nlgn1	0.0175369	0.0228514	-0.333977	0.125613	0.93	0.9405	1	0	SFARI					2	0
ENSMUSG00000021182	Ccdc88c	0.0175606	0.0325431	-0.157865	0.0331723	0.0928333	0.195167	1	0	SFARI					2	0
ENSMUSG00000117450	4933424G05Rik	0.0176833	0.0274367	-0.163343	0.0693031	0.16	0.286833	1	0
ENSMUSG00000112308	Gm48512	0.0177834	0.012468	-0.137744	0.0229055	0.088	0.182	1	0
ENSMUSG00000020456	Ogdh	0.0181343	0.0140599	-0.162373	0.0504565	0.253833	0.387333	1	0
ENSMUSG00000028488	Sh3gl2	0.0181615	0.0151983	-0.222093	0.0355848	0.569167	0.699833	1	0
ENSMUSG00000097589	Dleu2	0.0184803	0.0242286	-0.253124	0.0445594	0.235667	0.3665	1	0
ENSMUSG00000021929	Kpna3	0.0185099	0.0366988	-0.184309	0.0592214	0.147667	0.287	0.87573	0.304398
ENSMUSG00000033732	Sf3b3	0.0185309	0.0130746	-0.120733	0.0250225	0.0881667	0.18	1	0
ENSMUSG00000062901	Klhl24	0.0186792	0.0201639	-0.120024	0.0200006	0.0976667	0.197	1	0
ENSMUSG00000026864	Hspa5	0.0186835	0.0432093	0.241446	0.0649907	0.267833	0.1335	1	0
ENSMUSG00000041380	Htr2c	0.0187732	0.0228593	-0.24651	0.0769698	0.0701667	0.162667	1	0
ENSMUSG00000026204	Ptprn	0.018817	0.0130555	0.332067	0.0683429	0.686667	0.620333	1	0
ENSMUSG00000026361	Cdc73	0.0191019	0.0278222	-0.23714	0.06026	0.247167	0.381667	1	0
ENSMUSG00000060212	Pcnx2	0.0194137	0.0244286	-0.176653	0.0536618	0.165833	0.296333	1	0
ENSMUSG00000041670	Rims1	0.0194258	0.0185212	-0.178552	0.0662522	0.948	0.952667	1	0	SFARI;EAGLE		Moderate	11.35	Discordant	1	0
ENSMUSG00000040820	Hlcs	0.0199072	0.0270765	-0.180287	0.0329615	0.144833	0.255667	1	0
ENSMUSG00000050064	Zfp697	0.0201735	0.0314525	-0.133182	0.0324751	0.0453333	0.124	1	0
ENSMUSG00000022577	Ly6h	0.0202042	0.0272561	0.222186	0.0660737	0.494333	0.370333	1	0
ENSMUSG00000038563	Efl1	0.0204597	0.0124287	-0.0916851	0.0157419	0.0631667	0.142	1	0
ENSMUSG00000058589	Anks1b	0.0205357	0.033684	-0.183054	0.0508592	0.992333	0.996	1	0	SFARI					2	1
ENSMUSG00000026743	Mllt10	0.0207573	0.0385389	-0.197047	0.0556784	0.703833	0.7925	1	0
ENSMUSG00000039449	Prpf18	0.0208249	0.023059	-0.144015	0.0454376	0.1155	0.219	1	0
ENSMUSG00000036273	Lrrk2	0.0212202	0.0308019	-0.26602	0.069927	0.690333	0.774667	1	0
ENSMUSG00000028218	Cibar1	0.0213371	0.0263115	-0.125017	0.0269145	0.1155	0.219833	1	0
ENSMUSG00000041769	Ppp2r2d	0.0214757	0.0267467	-0.107742	0.0270544	0.0548333	0.1325	1	0
ENSMUSG00000014850	Msh3	0.0216374	0.0349261	-0.187331	0.044133	0.118333	0.226167	1	0
ENSMUSG00000040782	Cop1	0.0220011	0.0168272	-0.197509	0.0464751	0.356167	0.497	1	0
ENSMUSG00000041444	Arhgap32	0.0225843	0.0479397	-0.259181	0.0519544	0.5615	0.675167	1	0	SFARI					2	0
ENSMUSG00000032897	Nfyc	0.0226403	0.0323703	-0.22727	0.0458001	0.213333	0.335333	1	0
ENSMUSG00000106218	Gm43713	0.0227124	0.0252094	-0.142714	0.03534	0.0938333	0.196	1	0
ENSMUSG00000020647	Ncoa1	0.022884	0.0182752	-0.135063	0.0264712	0.4575	0.609833	1	0	SFARI;EAGLE		Limited	3	Discordant	1	0
ENSMUSG00000052446	Zfp961	0.023262	0.0156314	-0.1242	0.0102892	0.0565	0.131667	1	0
ENSMUSG00000041236	Vps41	0.0233334	0.0230161	-0.170202	0.0275686	0.210333	0.330333	1	0
ENSMUSG00000047466	8030462N17Rik	0.0239057	0.0291349	-0.200692	0.0411265	0.325	0.464833	1	0
ENSMUSG00000021983	Atp8a2	0.0240903	0.0248225	-0.16882	0.0666416	0.307833	0.4435	1	0
ENSMUSG00000039601	Rcan2	0.0242759	0.0294157	-0.207857	0.0502115	0.542667	0.676	1	0
ENSMUSG00000040794	C1qtnf4	0.0243053	0.0242507	0.249617	0.0589252	0.508333	0.392	1	0
ENSMUSG00000053465	Hs6st3	0.0244385	0.0191975	-0.358881	0.0928279	0.828667	0.8635	1	0
ENSMUSG00000032258	Lca5	0.0245345	0.0198486	-0.0818547	0.0217313	0.0863333	0.176167	1	0
ENSMUSG00000038879	Nipal2	0.0246568	0.0295867	-0.170753	0.0403795	0.0928333	0.183833	1	0
ENSMUSG00000041777	Cir1	0.0246832	0.0228137	-0.136485	0.0396992	0.0881667	0.178833	1	0
ENSMUSG00000050856	Atp5k	0.0251118	0.0208898	0.191502	0.0134751	0.147667	0.072	1	0
ENSMUSG00000039242	B3galnt2	0.0252074	0.0299276	-0.130147	0.0360855	0.0691667	0.153167	1	0
ENSMUSG00000022897	Dyrk1a	0.0258073	0.0230546	-0.17683	0.0483081	0.345833	0.486	1	0	SFARI;EAGLE;TADA	1.78e-13	Definitive	20.2	Concordant	1	1
ENSMUSG00000098145	Gm26936	0.0261254	0.0329942	-0.121437	0.0403685	0.0464	0.1228	1	0
ENSMUSG00000105736	Gm42456	0.0262125	0.0420549	-0.114324	0.0344996	0.120333	0.228333	1	0
ENSMUSG00000117222	Gm49906	0.0262521	0.0429288	-0.239269	0.064425	0.386333	0.541667	1	0
ENSMUSG00000022426	Josd1	0.0263376	0.0398544	-0.115992	0.0377435	0.0471667	0.129833	1	0
ENSMUSG00000048758	Rpl29	0.0265493	0.0390787	0.149441	0.030214	0.125833	0.051	1	0
ENSMUSG00000001674	Ddx18	0.0266619	0.0227465	-0.117725	0.0380034	0.0718333	0.153333	1	0
ENSMUSG00000031701	Dnaja2	0.026964	0.0428486	-0.187077	0.0734581	0.1505	0.265167	1	0
ENSMUSG00000048240	Gng7	0.0271039	0.0270335	-0.127845	0.0573928	0.303833	0.441167	1	0
ENSMUSG00000027810	Eif2a	0.0272907	0.0332298	-0.134432	0.037797	0.114333	0.215	1	0
ENSMUSG00000055866	Per2	0.0274174	0.0331787	-0.130962	0.0355879	0.0671667	0.153333	1	0	SFARI;EAGLE		Moderate	6.75	Concordant	2	0
ENSMUSG00000041977	Arhgef11	0.0275509	0.0259545	-0.132462	0.0251701	0.182833	0.3	1	0
ENSMUSG00000090841	Myl6	0.0278591	0.0301186	0.171007	0.029179	0.197167	0.106167	1	0
ENSMUSG00000003847	Nfat5	0.027987	0.0397813	-0.188728	0.0671559	0.458333	0.602333	1	0
ENSMUSG00000032560	Dnajc13	0.0284086	0.0577579	-0.20482	0.0578261	0.193333	0.324833	1	0
ENSMUSG00000053332	Gas5	0.0285348	0.0308854	0.171863	0.0392405	0.3145	0.204833	1	0
ENSMUSG00000056268	Dennd1b	0.0290326	0.0214311	-0.102348	0.0367529	0.369333	0.521667	1	0
ENSMUSG00000066392	Nrxn3	0.0290633	0.0425758	-0.125904	0.0478143	1	1	0.923602	0.187137	SFARI;EAGLE		Moderate	11.1	Discordant	1	0
ENSMUSG00000032403	2300009A05Rik	0.0290881	0.0353161	-0.114513	0.0220997	0.0481667	0.120167	1	0
ENSMUSG00000029199	Lias	0.0292676	0.03285	-0.113708	0.0376069	0.0473333	0.119333	1	0
ENSMUSG00000027651	Rprd1b	0.0293999	0.032975	-0.122801	0.0242936	0.107	0.199	1	0
ENSMUSG00000034612	Chst11	0.029593	0.0354235	-0.161098	0.0712675	0.27	0.412	1	0
ENSMUSG00000055407	Map6	0.0296689	0.0211113	-0.136004	0.0243254	0.139333	0.234	1	0
ENSMUSG00000030525	Chrna7	0.0297937	0.0236905	-0.176484	0.0255533	0.179833	0.287667	1	0	SFARI					2	0
ENSMUSG00000036503	Rnf13	0.0298378	0.0399101	-0.139635	0.0712271	0.1325	0.240667	1	0
ENSMUSG00000007783	Cpt1c	0.0299735	0.0447752	0.284252	0.0510097	0.499833	0.426	1	0
ENSMUSG00000032966	Fkbp1a	0.0300126	0.0568101	0.250051	0.0415823	0.304833	0.200667	1	0
ENSMUSG00000036879	Phkb	0.0300608	0.0266848	-0.131928	0.0417275	0.1655	0.2745	1	0
ENSMUSG00000021852	Slc35f4	0.0306949	0.0228977	-0.249666	0.0328361	0.270833	0.3845	1	0
ENSMUSG00000030760	Acer3	0.0307958	0.0180621	-0.119457	0.0205164	0.0976667	0.182833	1	0
ENSMUSG00000034813	Grip1	0.0309019	0.0532091	-0.213755	0.0732264	0.948667	0.953833	1	0	SFARI					2	0
ENSMUSG00000032020	Ubash3b	0.0310481	0.043089	-0.182605	0.035451	0.162833	0.267	1	0
ENSMUSG00000020121	Srgap1	0.031632	0.0362101	-0.20943	0.0588569	0.397667	0.540833	1	0
ENSMUSG00000029125	Stx18	0.031775	0.0329374	-0.121709	0.0370753	0.111667	0.206667	1	0
ENSMUSG00000052139	Babam2	0.0319013	0.026275	-0.182403	0.0736399	0.205833	0.332167	0.881977	0.289097
ENSMUSG00000010721	Lmbr1	0.0320296	0.0413912	-0.182617	0.0402396	0.182833	0.297333	1	0
ENSMUSG00000043384	Gprasp1	0.0320315	0.0292812	0.243238	0.0535956	0.603167	0.532167	1	0
ENSMUSG00000008658	Rbfox1	0.032607	0.0472941	-0.254175	0.0597528	1	0.997	1	0	SFARI					2	0
ENSMUSG00000060961	Slc4a4	0.0326787	0.0470262	-0.224475	0.047507	0.754833	0.7915	1	0
ENSMUSG00000030411	Nova2	0.0326993	0.017893	-0.125673	0.0125177	0.121167	0.210333	1	0	SFARI						1
ENSMUSG00000046709	Mapk10	0.0328393	0.0252689	-0.180065	0.0395555	0.804833	0.8535	1	0
ENSMUSG00000019806	Aig1	0.0332189	0.0403775	-0.225485	0.0730996	0.395	0.530333	1	0
ENSMUSG00000029207	Apbb2	0.0333405	0.0368439	-0.156144	0.0500196	0.264333	0.393	1	0
ENSMUSG00000035202	Lars2	0.0334322	0.0333114	0.353373	0.064059	0.519833	0.442167	1	0
ENSMUSG00000057230	Aak1	0.033755	0.0416833	-0.20991	0.0671077	0.515	0.629833	1	0
ENSMUSG00000005886	Ncoa2	0.0340424	0.0410986	-0.244655	0.0783748	0.444333	0.566333	1	0
ENSMUSG00000043289	Mei4	0.0340845	0.0389799	-0.152523	0.0393835	0.0461667	0.124	1	0
ENSMUSG00000030064	Frmd4b	0.0341817	0.0589927	-0.203998	0.0423338	0.2605	0.391167	1	0
ENSMUSG00000038205	Prkab2	0.0342004	0.0261332	-0.0999543	0.0181084	0.0663333	0.141833	1	0
ENSMUSG00000039166	Akap7	0.0342794	0.0437943	-0.108222	0.0347185	0.0633333	0.143	1	0
ENSMUSG00000055835	Zfp1	0.0348786	0.0370599	-0.123857	0.025272	0.0871667	0.169333	1	0
ENSMUSG00000034653	Ythdc2	0.0349181	0.0464771	-0.145437	0.0609623	0.2	0.3155	1	0	SFARI					2	0
ENSMUSG00000038740	Mvb12b	0.0349549	0.025812	-0.165741	0.0452871	0.3125	0.4415	1	0
ENSMUSG00000031987	Egln1	0.0349566	0.0372875	-0.124565	0.0236525	0.051	0.1185	1	0
ENSMUSG00000039599	Fam149b	0.035607	0.0274564	-0.0852181	0.0552029	0.108	0.2095	1	0
ENSMUSG00000067288	Rps28	0.0356283	0.0321642	0.151242	0.0243844	0.137333	0.0661667	1	0
ENSMUSG00000028149	Rap1gds1	0.0357077	0.0422391	-0.178191	0.0399664	0.390167	0.5255	1	0
ENSMUSG00000032437	Stt3b	0.0358173	0.0166135	-0.0978252	0.022492	0.138167	0.233	1	0
ENSMUSG00000074024	4632427E13Rik	0.0358204	0.0182644	-0.161354	0.0196354	0.210333	0.313333	1	0
ENSMUSG00000029501	Ankle2	0.0358834	0.0279663	-0.106882	0.0118543	0.094	0.178167	1	0
ENSMUSG00000097911	Gm26691	0.0359925	0.0389049	-0.188421	0.0608676	0.250833	0.364833	1	0
ENSMUSG00000020993	Trappc6b	0.0360543	0.0496068	-0.122252	0.0538185	0.1015	0.202833	1	0	SFARI						1
ENSMUSG00000038538	Ubn2	0.0360872	0.0315002	-0.140591	0.0459786	0.7065	0.788667	1	0	SFARI					2	0
ENSMUSG00000026245	Farsb	0.0363306	0.0450567	-0.150767	0.0449695	0.131833	0.229167	1	0
ENSMUSG00000019124	Scrn1	0.036573	0.0441048	-0.14769	0.053545	0.126667	0.231	1	0
ENSMUSG00000025917	Cops5	0.0366272	0.0726982	-0.111505	0.0551616	0.101333	0.212167	1	0
ENSMUSG00000098274	Rpl24	0.0368459	0.0308953	0.137147	0.026979	0.1155	0.049	1	0
ENSMUSG00000007617	Homer1	0.0368774	0.0406969	-0.105801	0.0986488	0.677167	0.764	1	0	SFARI					2	0
ENSMUSG00000030556	Lrrc28	0.037018	0.0378681	-0.119585	0.033099	0.178	0.2905	1	0
ENSMUSG00000028278	Rragd	0.0373717	0.0457577	-0.114717	0.0280856	0.0661667	0.147833	1	0
ENSMUSG00000028519	Dab1	0.0375383	0.0373466	-0.259898	0.079107	0.9175	0.9025	1	0
ENSMUSG00000057322	Rpl38	0.0380208	0.0481227	0.177042	0.026622	0.1905	0.109	1	0
ENSMUSG00000031618	Nr3c2	0.0383273	0.050293	-0.206854	0.0553194	0.41	0.532167	1	0	SFARI					1	1
ENSMUSG00000038267	Slc22a23	0.0387201	0.0782341	-0.174185	0.0412906	0.154333	0.265333	1	0
ENSMUSG00000038332	Sesn1	0.0387534	0.0406672	-0.193875	0.0741627	0.28	0.415667	1	0
ENSMUSG00000003458	Ncstn	0.0390622	0.0470549	-0.0857774	0.0359765	0.0556667	0.128833	1	0
ENSMUSG00000022340	Sybu	0.0392664	0.0497071	-0.214025	0.0727027	0.353333	0.485833	1	0	SFARI					3	0
ENSMUSG00000040640	Erc2	0.0395512	0.0402627	-0.189376	0.0633586	0.988667	0.9755	1	0
ENSMUSG00000039828	Wdr70	0.0396766	0.059511	-0.15667	0.0411786	0.174167	0.2785	1	0
ENSMUSG00000022419	Deptor	0.0399061	0.0442893	-0.164927	0.0591875	0.138	0.235833	1	0
ENSMUSG00000101930	Gm5441	0.0399816	0.0863193	-0.174197	0.070579	0.072	0.176333	1	0
ENSMUSG00000042256	Ptchd4	0.040031	0.0396727	-0.241911	0.0594626	0.144667	0.235167	1	0
ENSMUSG00000031529	Tnks	0.0401295	0.0328634	-0.169087	0.0551372	0.3275	0.450667	1	0
ENSMUSG00000000131	Xpo6	0.0402143	0.0240323	-0.146494	0.0326884	0.161667	0.2585	1	0
ENSMUSG00000038170	Pde4dip	0.0404842	0.0312268	-0.213993	0.0432482	0.571833	0.681667	1	0
ENSMUSG00000036356	Csgalnact1	0.0405499	0.0433795	-0.28494	0.0538088	0.2935	0.404167	1	0
ENSMUSG00000024843	Chka	0.0411112	0.0667242	-0.174166	0.0574393	0.251167	0.372333	1	0
ENSMUSG00000032936	Camkv	0.0411771	0.0351396	0.268408	0.0558824	0.533	0.450833	1	0
ENSMUSG00000046876	Atxn1	0.0413625	0.0782458	-0.19518	0.0497699	0.956667	0.960167	1	0
ENSMUSG00000039275	Foxk2	0.0418482	0.061815	-0.149938	0.0551207	0.106167	0.205667	1	0
ENSMUSG00000040938	Slc16a11	0.0418821	0.0290544	0.185128	0.0266193	0.214	0.1335	1	0
ENSMUSG00000049624	Slc17a5	0.0424965	0.067991	-0.0989873	0.0341585	0.056	0.132667	1	0
ENSMUSG00000079564	Gm11149	0.0425763	0.0399116	-0.108343	0.0283114	0.0681667	0.141	1	0
ENSMUSG00000031284	Pak3	0.042924	0.0399113	-0.203148	0.0347937	0.428	0.555833	1	0
ENSMUSG00000048701	Ccdc6	0.0432053	0.0507807	-0.106049	0.0368067	0.0825	0.164667	1	0
ENSMUSG00000026834	Acvr1c	0.0432797	0.0675884	-0.132884	0.0637214	0.0796667	0.1665	1	0
ENSMUSG00000051177	Plcb1	0.0433286	0.0936325	-0.20633	0.051913	1	1	1	0	SFARI					2	0
ENSMUSG00000027797	Dclk1	0.0434306	0.038889	-0.147134	0.0250282	0.958333	0.965167	1	0
ENSMUSG00000032009	Sesn3	0.0438343	0.0980607	-0.195463	0.0714751	0.284	0.4355	1	0
ENSMUSG00000020817	Rabep1	0.0442485	0.0652392	-0.193486	0.061349	0.350333	0.4915	1	0
ENSMUSG00000021282	Eif5	0.0445806	0.0620335	-0.0975104	0.0438868	0.1145	0.211333	1	0
ENSMUSG00000042506	Usp22	0.0447807	0.0775368	-0.0929159	0.0444709	0.0575	0.136333	1	0
ENSMUSG00000048756	Foxo3	0.0448246	0.0751033	-0.151837	0.0491047	0.130667	0.228167	1	0
ENSMUSG00000031996	Aplp2	0.0448954	0.0527466	0.282034	0.0617241	0.451833	0.357833	1	0
ENSMUSG00000036264	Fstl4	0.0452144	0.0505835	-0.117615	0.0510214	0.0595	0.134333	1	0
ENSMUSG00000055254	Ntrk2	0.0452351	0.0722336	-0.117681	0.0959572	0.820833	0.8645	1	0	SFARI						1
ENSMUSG00000042670	Immp1l	0.0453548	0.0868816	-0.150907	0.0631903	0.142	0.247167	1	0
ENSMUSG00000022498	Txndc11	0.0458057	0.0531442	-0.170784	0.0513931	0.1705	0.268	1	0
ENSMUSG00000057060	Slc35f3	0.045914	0.0510716	-0.234886	0.0786656	0.449	0.586167	1	0
ENSMUSG00000006262	Mob1b	0.0460735	0.0385531	-0.112033	0.0288873	0.1195	0.204667	1	0
ENSMUSG00000031536	Polb	0.0461608	0.0471684	-0.222665	0.0575024	0.343833	0.4605	1	0
ENSMUSG00000055116	Arntl	0.0464867	0.049853	-0.126194	0.0363974	0.145667	0.2415	1	0
ENSMUSG00000032939	Nup93	0.0465683	0.0653095	-0.227618	0.0955265	0.330667	0.467833	0.976685	0.0571099
ENSMUSG00000025925	Terf1	0.0466622	0.0551297	-0.137596	0.0522542	0.0578	0.1352	1	0
ENSMUSG00000036095	Dgkb	0.04678	0.0582259	-0.240885	0.0860462	0.983	0.9775	1	0
ENSMUSG00000042182	Bend6	0.046849	0.0462732	-0.12613	0.0317282	0.0623333	0.128833	1	0
ENSMUSG00000021448	Shc3	0.0472241	0.0549099	-0.154607	0.0376209	0.158	0.258333	1	0
ENSMUSG00000036438	Calm2	0.047271	0.0468934	0.208722	0.0348205	0.692333	0.611667	1	0
ENSMUSG00000049755	Zfp672	0.0474198	0.0817825	-0.102565	0.0407717	0.0511667	0.124	1	0
ENSMUSG00000038733	Wdr26	0.048478	0.0375363	-0.127454	0.0300625	0.221833	0.334333	1	0	SFARI						1
ENSMUSG00000020111	Micu1	0.0486012	0.0315005	-0.147263	0.0279816	0.187667	0.283	1	0
ENSMUSG00000037876	Jmjd1c	0.0487807	0.0475877	-0.187429	0.0584493	0.542167	0.6515	1	0	SFARI					2	0
ENSMUSG00000097375	6720427I07Rik	0.0488161	0.0910508	-0.191119	0.0584389	0.0928333	0.1875	1	0
ENSMUSG00000051285	Pcmtd1	0.0488407	0.0425133	-0.14778	0.0659777	0.368333	0.503833	1	0
ENSMUSG00000034472	Rasd2	0.0489102	0.0423228	-0.0833072	0.0321378	0.052	0.1218	1	0
ENSMUSG00000033712	Ccar2	0.0491266	0.00939208	-0.0716638	0.00613805	0.0613333	0.124167	1	0
ENSMUSG00000029713	Gnb2	0.0493404	0.0367177	0.175763	0.0354556	0.258333	0.171333	1	0	SFARI						1
ENSMUSG00000021700	Rab3c	0.0494153	0.0736655	-0.242724	0.0725425	0.413	0.553833	1	0
ENSMUSG00000026970	Rbms1	0.0495404	0.0421292	-0.200371	0.0460832	0.269667	0.381667	1	0
ENSMUSG00000027457	Snph	0.0496042	0.034649	-0.123151	0.0182474	0.207667	0.3075	1	0

## Sheet: Interneuron
ensembl	gene	p_val.mean	p_val.std	avg_log2FC.mean	avg_log2FC.std	pct.1.mean	pct.2.mean	padj.mean	padj.std	ASD.status	TADA.FDR	EAGLE.annotation	EAGLE.score	EAGLE.concordance	SFARI.score	SFARI.syndromic
ENSMUSG00000026872	Zeb2	3.09969e-23	2.0285e-23	-0.790988	0.0249868	0.3564	0.6658	9.38647e-19	6.1427e-19
ENSMUSG00000053477	Tcf4	6.30711e-19	1.12214e-18	-0.608843	0.0180285	0.6668	0.8984	1.90992e-14	3.39807e-14	SFARI;EAGLE;TADA	0.00271594	Definitive	13.5	Concordant	1	1
ENSMUSG00000037610	Kcnmb2	6.8309e-17	1.52721e-16	-0.784478	0.0636536	0.3242	0.593	2.06853e-12	4.6247e-12
ENSMUSG00000006930	Hap1	9.62938e-16	1.33857e-15	0.446478	0.0104551	0.358	0.134	2.91597e-11	4.05347e-11
ENSMUSG00000034813	Grip1	5.91592e-15	1.28398e-14	-0.43812	0.0311428	0.9516	0.998	1.79146e-10	3.88813e-10	SFARI					2	0
ENSMUSG00000008489	Elavl2	2.42073e-14	3.94003e-14	-0.41248	0.0238075	0.7652	0.9206	7.33046e-10	1.19312e-09	SFARI					2	0
ENSMUSG00000038872	Zfhx3	9.50451e-14	1.43273e-13	0.911775	0.0156056	0.3146	0.126	2.87816e-09	4.3386e-09
ENSMUSG00000027210	Meis2	3.4064e-12	5.548e-12	0.669254	0.0745516	0.3126	0.125	1.03153e-07	1.68005e-07	SFARI;EAGLE;TADA	0.00517313	Moderate	7.5	Discordant	1	1
ENSMUSG00000022199	Slc22a17	8.61182e-11	1.20439e-10	0.376967	0.0125383	0.6802	0.4954	2.60783e-06	3.64712e-06
ENSMUSG00000022935	Grik1	2.16483e-10	2.50134e-10	-0.767569	0.0533768	0.5276	0.692	6.55554e-06	7.57456e-06
ENSMUSG00000035681	Kcnc2	2.19833e-10	4.0299e-10	-0.803025	0.0584607	0.6504	0.7718	6.65698e-06	1.22033e-05	SFARI					3	0
ENSMUSG00000020719	Ddx5	4.77421e-10	1.021e-09	0.400034	0.0214335	0.8148	0.731	1.44573e-05	3.09179e-05
ENSMUSG00000062209	Erbb4	5.97564e-10	5.9053e-10	-0.564365	0.0362856	0.6934	0.8388	1.80954e-05	1.78824e-05
ENSMUSG00000055435	Maf	8.95926e-10	1.6272e-09	-0.385362	0.0187125	0.263	0.4658	2.71304e-05	4.9275e-05
ENSMUSG00000033278	Ptprm	1.34624e-09	1.60582e-09	-0.496263	0.0261281	0.5372	0.7186	4.07668e-05	4.86273e-05
ENSMUSG00000004383	Large1	1.57922e-09	3.20444e-09	-0.344532	0.0218687	0.8736	0.9206	4.78218e-05	9.70368e-05
ENSMUSG00000056296	Synpr	1.81256e-09	2.1452e-09	-0.671233	0.0235798	0.2822	0.4514	5.4888e-05	6.49609e-05
ENSMUSG00000040420	Cdh18	2.01697e-09	2.79625e-09	0.605998	0.0557348	0.6954	0.5056	6.10778e-05	8.4676e-05
ENSMUSG00000039607	Rbms3	2.31143e-09	3.25288e-09	-0.368911	0.0518937	0.8192	0.9054	6.99948e-05	9.85038e-05
ENSMUSG00000027520	Zdbf2	3.53843e-09	5.86562e-09	0.33603	0.0260697	0.295	0.1342	0.000107151	0.000177623
ENSMUSG00000021268	Meg3	5.8998e-09	1.04435e-08	0.176302	0.0136247	1	1	0.000178658	0.000316251
ENSMUSG00000027238	Frmd5	7.55411e-09	7.48611e-09	-0.33854	0.0319271	0.8764	0.9398	0.000228754	0.000226694
ENSMUSG00000004110	Cacna1e	7.97742e-09	1.28337e-08	0.495939	0.0524945	0.6234	0.4558	0.000241572	0.000388629	SFARI					1	0
ENSMUSG00000036617	Etl4	8.80091e-09	1.26209e-08	-0.523741	0.0366638	0.6992	0.7848	0.000266509	0.000382185
ENSMUSG00000054423	Cadps	1.11323e-08	2.44997e-08	-0.273085	0.0204	0.9544	0.9814	0.000337108	0.000741899	SFARI					2	0
ENSMUSG00000033981	Gria2	1.38077e-08	2.69288e-08	0.281796	0.0221093	0.9884	0.9838	0.000418125	0.000815459	SFARI;EAGLE;TADA	0.0666362	Definitive	12	Concordant	1	0
ENSMUSG00000026223	Itm2c	1.54837e-08	2.63782e-08	0.329121	0.0145654	0.377	0.216	0.000468876	0.000798783
ENSMUSG00000026141	Col19a1	1.67996e-08	2.5232e-08	-0.576352	0.0322841	0.2836	0.4652	0.000508724	0.000764076
ENSMUSG00000033308	Dpyd	2.04216e-08	4.53996e-08	0.639939	0.0320883	0.2904	0.136	0.000618408	0.00137479	SFARI					2	0
ENSMUSG00000018451	6330403K07Rik	2.0451e-08	4.39091e-08	0.244351	0.0272511	0.3052	0.1428	0.000619296	0.00132966
ENSMUSG00000003279	Dlgap1	2.78307e-08	5.89275e-08	-0.308812	0.0302408	0.9584	0.9906	0.00084277	0.00178444	SFARI					2	0
ENSMUSG00000051951	Xkr4	2.82698e-08	3.99133e-08	-0.343554	0.0242962	0.9706	0.9814	0.000856066	0.00120866
ENSMUSG00000022577	Ly6h	3.64165e-08	3.68137e-08	0.338201	0.00888463	0.6546	0.4936	0.00110276	0.00111479
ENSMUSG00000090063	Dlx6os1	3.86719e-08	6.83724e-08	-0.422604	0.0373736	0.4076	0.5978	0.00117106	0.00207045
ENSMUSG00000037492	Zmat4	4.8255e-08	1.04508e-07	-0.363189	0.0294247	0.5954	0.7542	0.00146126	0.00316473
ENSMUSG00000112117	Rmst	5.93569e-08	1.28318e-07	0.707447	0.0743776	0.3492	0.1806	0.00179745	0.00388572
ENSMUSG00000025255	Zfhx4	6.57428e-08	7.82298e-08	0.319378	0.0193946	0.2288	0.0952	0.00199082	0.00236895
ENSMUSG00000092341	Malat1	6.57752e-08	8.9663e-08	-0.209652	0.021097	1	1	0.0019918	0.00271518
ENSMUSG00000043456	Zfp536	9.39175e-08	2.07694e-07	-0.323414	0.024972	0.5564	0.8018	0.00284401	0.00628939
ENSMUSG00000040270	Bach2	1.11152e-07	1.68974e-07	-0.311331	0.04041	0.458	0.6246	0.0033659	0.00511688
ENSMUSG00000021047	Nova1	1.16856e-07	1.75553e-07	0.465542	0.0709407	0.521	0.3708	0.00353864	0.0053161
ENSMUSG00000005583	Mef2c	1.39454e-07	1.94616e-07	-0.487357	0.0139485	0.4544	0.5772	0.00422294	0.00589335	SFARI;EAGLE		Moderate	9.85	Discordant	1	1
ENSMUSG00000062151	Unc13c	1.6958e-07	1.90478e-07	0.37026	0.0568607	0.2812	0.139	0.00513523	0.00576805
ENSMUSG00000097311	Gm26871	1.7125e-07	2.05855e-07	0.732099	0.0458189	0.6758	0.5794	0.0051858	0.00623369
ENSMUSG00000026335	Pam	2.12789e-07	2.57611e-07	-0.414889	0.0593071	0.7124	0.8278	0.00644369	0.00780096
ENSMUSG00000026463	Atp2b4	2.21722e-07	2.67719e-07	0.275632	0.0348466	0.215	0.0874	0.00671418	0.00810705
ENSMUSG00000033585	Ndn	2.43505e-07	2.47705e-07	0.226477	0.025485	0.2284	0.0984	0.00737383	0.007501
ENSMUSG00000021779	Thrb	2.51994e-07	4.6426e-07	-0.413339	0.0579848	0.5812	0.718	0.00763087	0.0140587
ENSMUSG00000023927	Satb1	3.65034e-07	7.32574e-07	-0.365136	0.0249585	0.1296	0.2654	0.011054	0.0221838	SFARI;EAGLE		Limited	2.5	Discordant	1	0
ENSMUSG00000066687	Zbtb16	3.72252e-07	4.87189e-07	-0.354149	0.0308041	0.3274	0.4794	0.0112725	0.0147531	SFARI					2	0
ENSMUSG00000015656	Hspa8	4.46142e-07	4.26352e-07	0.300377	0.039559	0.608	0.454	0.0135101	0.0129108
ENSMUSG00000047495	Dlgap2	4.72357e-07	1.04005e-06	-0.384502	0.0403119	0.8488	0.8752	0.0143039	0.0314947	SFARI;EAGLE		Limited	2.8	Discordant	2	0
ENSMUSG00000047261	Gap43	5.12531e-07	1.0958e-06	0.324677	0.0291337	0.49	0.3252	0.0155205	0.0331832
ENSMUSG00000042256	Ptchd4	5.38381e-07	6.69286e-07	-0.359574	0.047005	0.4736	0.6046	0.0163033	0.0202673
ENSMUSG00000047507	Baiap3	5.96785e-07	6.71669e-07	0.233045	0.0164052	0.2236	0.1014	0.0180718	0.0203395
ENSMUSG00000053965	Pde5a	6.09361e-07	8.61533e-07	-0.236305	0.0205636	0.0374	0.1278	0.0184527	0.0260889
ENSMUSG00000037996	Slc24a2	6.45287e-07	1.20653e-06	-0.339885	0.0141259	0.636	0.7404	0.0195406	0.0365361	SFARI					2	0
ENSMUSG00000097391	Mirg	6.63272e-07	1.11829e-06	0.274264	0.0411984	0.8474	0.779	0.0200852	0.0338642
ENSMUSG00000098243	Gm4258	7.86938e-07	1.57404e-06	-0.304954	0.0407153	0.3724	0.5356	0.0238301	0.0476652
ENSMUSG00000026204	Ptprn	9.82161e-07	6.8583e-07	0.300018	0.0204074	0.7074	0.599	0.0297418	0.0207683
ENSMUSG00000046709	Mapk10	1.22336e-06	2.72082e-06	-0.280252	0.0416024	0.901	0.9448	0.0370458	0.0823918
ENSMUSG00000043673	Kcns3	1.54124e-06	1.90813e-06	-0.221064	0.0191394	0.1126	0.2356	0.0466719	0.0577819	SFARI					2	0
ENSMUSG00000005268	Prlr	2.30053e-06	4.3688e-06	0.195503	0.0123878	0.1182	0.0306	0.0696646	0.132296
ENSMUSG00000021010	Npas3	2.42273e-06	3.06013e-06	-0.930656	0.021921	0.4496	0.5544	0.0733652	0.0926668
ENSMUSG00000038048	Cntnap5c	2.74903e-06	3.8091e-06	-0.481842	0.0718729	0.41	0.5686	0.0832461	0.115347
ENSMUSG00000021130	Galnt16	2.75313e-06	4.69439e-06	0.215656	0.0273088	0.2532	0.1248	0.0833704	0.142156
ENSMUSG00000047907	Tshz2	3.00682e-06	4.13757e-06	0.448813	0.0361193	0.381	0.2436	0.0910524	0.125294
ENSMUSG00000060988	Galnt13	3.1404e-06	2.67014e-06	0.291068	0.0146159	0.8114	0.6844	0.0950975	0.0808573	SFARI					2	0
ENSMUSG00000031523	Dlc1	3.59984e-06	3.13462e-06	-0.329537	0.0201655	0.537	0.655	0.10901	0.0949224
ENSMUSG00000020589	Cyria	3.95876e-06	5.61335e-06	-0.248507	0.0252268	0.2498	0.3906	0.119879	0.169984
ENSMUSG00000024897	Apba1	4.06739e-06	8.233e-06	-0.393469	0.0311261	0.518	0.6452	0.123169	0.249312
ENSMUSG00000029094	Afap1	4.66553e-06	6.46021e-06	-0.248766	0.0383956	0.2494	0.4012	0.141282	0.195628
ENSMUSG00000040785	Ttc3	4.98641e-06	3.97702e-06	0.184816	0.0159589	0.985	0.9688	0.150998	0.120432
ENSMUSG00000020053	Igf1	5.06795e-06	7.73026e-06	-0.208238	0.0241101	0.0778	0.1848	0.153468	0.234088	SFARI					3	0
ENSMUSG00000062078	Qk	5.3758e-06	7.8982e-06	-0.267514	0.0385394	0.657	0.7862	0.16279	0.239173
ENSMUSG00000026344	Lypd1	5.78237e-06	5.61912e-06	0.131521	0.0118147	0.1204	0.039	0.175102	0.170158
ENSMUSG00000031133	Arhgef6	5.93712e-06	6.70726e-06	-0.195331	0.0197155	0.1388	0.2608	0.179788	0.203109
ENSMUSG00000052920	Prkg1	5.97967e-06	1.03394e-05	0.607836	0.0583626	0.5296	0.3974	0.181076	0.313097
ENSMUSG00000087402	Gm11867	6.59248e-06	7.62107e-06	0.242229	0.0125722	0.3384	0.2174	0.199634	0.230781
ENSMUSG00000051527	Usp29	6.77894e-06	1.46823e-05	0.359049	0.043049	0.8156	0.736	0.205161	0.444345
ENSMUSG00000021087	Rtn1	6.86516e-06	1.5074e-05	0.307289	0.0434243	0.9154	0.8138	0.203014	0.445566
ENSMUSG00000034621	Gpatch8	7.46397e-06	8.62558e-06	-0.237216	0.0159349	0.7402	0.8248	0.226024	0.2612
ENSMUSG00000097393	D030068K23Rik	7.50196e-06	1.11499e-05	0.253256	0.00704876	0.2092	0.103	0.227174	0.337642
ENSMUSG00000036298	Slc2a13	7.76931e-06	7.95995e-06	-0.332024	0.044792	0.65	0.7666	0.23527	0.241043
ENSMUSG00000025579	Gaa	8.3174e-06	1.14971e-05	0.268218	0.0211853	0.4536	0.3176	0.251867	0.348154
ENSMUSG00000046844	Vat1l	8.38055e-06	6.73443e-06	0.290418	0.00784192	0.277	0.164	0.25378	0.203932
ENSMUSG00000055254	Ntrk2	8.41412e-06	9.82523e-06	-0.330539	0.0358274	0.8492	0.9054	0.254796	0.297528	SFARI						1
ENSMUSG00000096914	Galntl6	9.23962e-06	1.37274e-05	-0.338729	0.0433524	0.9154	0.9612	0.279794	0.415694
ENSMUSG00000022307	Oxr1	9.44757e-06	1.7986e-05	-0.356865	0.0420984	0.8336	0.8628	0.235146	0.431572
ENSMUSG00000022186	Oxct1	1.03116e-05	1.42343e-05	-0.224075	0.0228953	0.4492	0.6064	0.303753	0.413085
ENSMUSG00000032503	Arpp21	1.10601e-05	6.3439e-06	0.319896	0.0365127	0.4964	0.3568	0.334921	0.192106
ENSMUSG00000029822	Osbpl3	1.12217e-05	1.52082e-05	-0.255226	0.0269117	0.2726	0.405	0.309659	0.394329
ENSMUSG00000029189	Sel1l3	1.18709e-05	1.67143e-05	-0.220391	0.0255988	0.0998	0.2086	0.318022	0.420608
ENSMUSG00000087231	E230016M11Rik	1.29741e-05	1.64608e-05	-0.165124	0.0302257	0.2114	0.3536	0.376377	0.470506
ENSMUSG00000042589	Cux2	1.32492e-05	1.17915e-05	-0.245034	0.013381	0.314	0.4456	0.401211	0.357072	SFARI					2	1
ENSMUSG00000020173	Cobl	1.37085e-05	9.37027e-06	0.200037	0.0131911	0.2914	0.171	0.415122	0.283751
ENSMUSG00000041380	Htr2c	1.53891e-05	2.95605e-05	0.409985	0.0532831	0.4874	0.3302	0.253437	0.422617
ENSMUSG00000001260	Gabrg1	1.56739e-05	3.04736e-05	0.375579	0.0510807	0.307	0.1802	0.251013	0.427551
ENSMUSG00000029602	Rasal1	1.62649e-05	2.18344e-05	0.136353	0.012263	0.1238	0.0436	0.368788	0.406614
ENSMUSG00000032020	Ubash3b	1.70629e-05	1.80261e-05	-0.227993	0.0194364	0.366	0.503	0.428511	0.364807
ENSMUSG00000048834	Vstm2a	1.74929e-05	2.19433e-05	-0.223273	0.0145895	0.349	0.4904	0.393996	0.379227
ENSMUSG00000053819	Camk2d	1.85206e-05	1.79767e-05	0.389738	0.0260389	0.6224	0.5196	0.508767	0.467792
ENSMUSG00000022762	Ncam2	2.03009e-05	3.22554e-05	0.365882	0.0613405	0.7558	0.6294	0.360064	0.471445
ENSMUSG00000097589	Dleu2	2.06502e-05	3.52516e-05	-0.240979	0.0277523	0.1808	0.3036	0.322124	0.40746
ENSMUSG00000025372	Baiap2	2.08076e-05	4.10646e-05	0.201496	0.0223143	0.1864	0.0848	0.260004	0.420512
ENSMUSG00000021708	Rasgrf2	2.17664e-05	2.53928e-05	-0.376544	0.0648012	0.4074	0.5214	0.481272	0.500555
ENSMUSG00000003273	Car11	2.37266e-05	2.62156e-05	0.173803	0.0168737	0.2628	0.1524	0.505049	0.371919
ENSMUSG00000098973	Mir6236	2.52922e-05	3.13709e-05	0.29017	0.0314651	0.933	0.8882	0.449094	0.504847
ENSMUSG00000040640	Erc2	2.58462e-05	3.39786e-05	-0.23351	0.0304371	0.9644	0.9866	0.464964	0.489481
ENSMUSG00000034613	Ppm1h	2.86975e-05	1.91693e-05	-0.240668	0.00664553	0.4984	0.6178	0.698159	0.419129
ENSMUSG00000056755	Grm7	2.88393e-05	5.50807e-05	0.391798	0.0469904	0.719	0.6168	0.303893	0.41223	SFARI					2	0
ENSMUSG00000044042	Fmn1	3.02041e-05	5.66514e-05	-0.240954	0.0300975	0.303	0.4348	0.318619	0.389244
ENSMUSG00000035202	Lars2	3.1986e-05	2.59484e-05	0.268816	0.0173228	0.619	0.522	0.658492	0.383064
ENSMUSG00000063511	Snrnp70	3.21373e-05	3.9647e-05	0.226819	0.0196311	0.9116	0.8778	0.477993	0.483572
ENSMUSG00000118193	Arhgap26	3.30862e-05	3.7145e-05	-0.21208	0.0116737	0.2774	0.4054	0.540834	0.428027
ENSMUSG00000101621	Gm28905	3.32965e-05	3.19961e-05	0.333514	0.0465292	0.3432	0.2218	0.623732	0.431873
ENSMUSG00000059187	Tafa1	3.43977e-05	2.8143e-05	0.466581	0.0375678	0.159	0.0722	0.673958	0.309807
ENSMUSG00000051401	Kctd16	3.85668e-05	5.37268e-05	-0.42213	0.040196	0.7408	0.8222	0.507159	0.45462
ENSMUSG00000100826	Snhg14	3.99118e-05	8.5507e-05	0.167732	0.0237418	0.9988	1	0.240846	0.430193
ENSMUSG00000022537	Tmem44	4.01341e-05	3.50576e-05	-0.130388	0.0101815	0.0922	0.1868	0.79312	0.293906
ENSMUSG00000022987	Zfp641	4.54716e-05	8.83457e-05	-0.152132	0.0171936	0.127	0.2358	0.345248	0.382204
ENSMUSG00000028360	Slc44a5	4.76627e-05	7.76414e-05	-0.36416	0.0361288	0.4194	0.543	0.521156	0.414668
ENSMUSG00000022748	Cmss1	4.90307e-05	6.76619e-05	0.282486	0.0223126	0.9026	0.9048	0.535046	0.440225
ENSMUSG00000059456	Ptk2b	4.96129e-05	7.58596e-05	0.176536	0.0177877	0.1352	0.0544	0.586628	0.480537
ENSMUSG00000090101	Snhg9	4.98027e-05	9.34308e-05	0.141015	0.0146404	0.1582	0.0674	0.400841	0.464531
ENSMUSG00000024074	Crim1	5.27091e-05	0.000101464	0.24887	0.0276099	0.1894	0.089	0.384882	0.492029
ENSMUSG00000006651	Aplp1	5.33912e-05	3.4493e-05	0.209494	0.0248217	0.3992	0.2806	0.808595	0.427995
ENSMUSG00000001988	Npas1	5.57331e-05	9.02876e-05	-0.123252	0.0108831	0.0432	0.1188	0.49436	0.462863
ENSMUSG00000084946	Dlx1as	5.97718e-05	7.14746e-05	-0.190303	0.0195223	0.2186	0.3398	0.53971	0.428704
ENSMUSG00000025151	Maged1	6.02473e-05	0.000120942	0.237387	0.022261	0.6346	0.5178	0.351406	0.419383
ENSMUSG00000029212	Gabrb1	6.53072e-05	9.45061e-05	0.297716	0.0486234	0.8706	0.821	0.472796	0.491922
ENSMUSG00000116029	Gm41414	6.75743e-05	0.000104966	0.151264	0.0153016	0.1134	0.0372	0.434835	0.519669
ENSMUSG00000025425	St8sia5	6.76691e-05	3.94194e-05	-0.151911	0.0125488	0.194	0.308	0.918404	0.112258
ENSMUSG00000040938	Slc16a11	6.91858e-05	0.000105557	0.213699	0.0178708	0.279	0.174	0.739294	0.378235
ENSMUSG00000067786	Nnat	6.98026e-05	0.00014309	0.396205	0.0299461	0.3068	0.1902	0.341367	0.387299
ENSMUSG00000071424	Grid2	8.45046e-05	0.000116603	0.403729	0.0564973	0.8184	0.7584	0.62494	0.513624	SFARI					2	0
ENSMUSG00000038132	Rbm24	8.59026e-05	0.000149726	0.119217	0.0103154	0.109	0.0384	0.612532	0.401959
ENSMUSG00000049606	Zfp644	8.59514e-05	6.45346e-05	-0.137727	0.010534	0.1448	0.2478	0.834389	0.370317
ENSMUSG00000017412	Cacnb4	8.89024e-05	0.000135799	-0.274134	0.035329	0.6882	0.7712	0.470128	0.493817
ENSMUSG00000105265	Sox2ot	8.99072e-05	0.000160613	-0.423071	0.128566	0.4172	0.5554	0.640946	0.348163
ENSMUSG00000029913	Prdm5	9.07521e-05	0.000111812	-0.112349	0.0167269	0.0642	0.146	0.670658	0.312712
ENSMUSG00000020728	Cep112	9.10617e-05	8.99949e-05	0.260683	0.0326413	0.5824	0.4612	0.738265	0.385621
ENSMUSG00000025225	Nfkb2	9.25899e-05	7.05703e-05	0.132445	0.0100084	0.1708	0.0838	0.820745	0.400827
ENSMUSG00000038248	Sobp	9.27575e-05	0.000109118	-0.253506	0.0255741	0.575	0.6804	0.743617	0.367708
ENSMUSG00000059173	Pde1a	9.52299e-05	0.000155021	0.443885	0.0749768	0.5164	0.389	0.785222	0.364376
ENSMUSG00000057378	Ryr3	0.00010013	0.000116885	0.291537	0.0424009	0.5056	0.3702	0.641758	0.492385
ENSMUSG00000039652	Cpeb3	0.000102287	9.21084e-05	-0.21226	0.0258168	0.6832	0.7892	0.724893	0.393971
ENSMUSG00000042807	Hecw2	0.000103262	8.21764e-05	-0.195034	0.0185812	0.7432	0.8338	0.822112	0.397769	SFARI					2	0
ENSMUSG00000036469	Marchf1	0.000104515	9.86194e-05	0.341155	0.044222	0.7238	0.6326	0.804157	0.437917
ENSMUSG00000024238	Zeb1	0.000104903	0.000225359	0.248928	0.0325604	0.689	0.5712	0.299795	0.392199
ENSMUSG00000044646	Zbtb7c	0.000116691	0.000114097	0.134169	0.0119621	0.1324	0.0568	0.892275	0.148786
ENSMUSG00000042216	Sgsm1	0.000117776	8.01645e-05	0.213223	0.0140223	0.418	0.3066	0.962257	0.0843969
ENSMUSG00000019505	Ubb	0.000119977	0.000174892	0.322825	0.0304694	0.4644	0.3634	0.453865	0.501078
ENSMUSG00000031024	Denn2b	0.000120652	0.000228966	-0.187751	0.0227931	0.1256	0.23	0.482709	0.482056
ENSMUSG00000031428	Zcchc18	0.000120999	0.000198381	0.262726	0.0201028	0.665	0.5964	0.71219	0.402037
ENSMUSG00000068923	Syt11	0.000125277	7.59946e-05	0.231041	0.0342122	0.629	0.526	0.806778	0.432058
ENSMUSG00000035967	Ints6l	0.000138686	0.000200951	-0.240098	0.0340522	0.4046	0.5308	0.668544	0.468324
ENSMUSG00000043432	Leng9	0.000139378	0.000211154	0.185321	0.0209401	0.4476	0.3196	0.657033	0.469838
ENSMUSG00000062590	Armc9	0.000142069	4.57101e-05	0.198984	0.00940402	0.4694	0.363	1	0
ENSMUSG00000035357	Pdzrn3	0.000148899	0.000213595	-0.267164	0.0142774	0.0866	0.17	0.853506	0.264927
ENSMUSG00000044349	Snhg11	0.000150394	0.000186439	0.101155	0.00919782	1	1	0.832238	0.375127
ENSMUSG00000020612	Prkar1a	0.000156453	0.000100304	0.160142	0.00453122	0.4582	0.3414	1	0
ENSMUSG00000035158	Mitf	0.000159364	0.000231439	-0.246737	0.0408907	0.2284	0.345	0.544516	0.457928
ENSMUSG00000025370	Cdh9	0.000162377	0.000154238	-0.338811	0.0311241	0.2084	0.3118	0.87901	0.270543	SFARI					2	0
ENSMUSG00000028373	Astn2	0.000164612	0.000306175	-0.25684	0.0205514	0.7936	0.8622	0.821632	0.285084	SFARI;EAGLE		Limited	2.5	Discordant	2	0
ENSMUSG00000004508	Gab2	0.000171242	0.000380653	-0.247081	0.0275087	0.4968	0.6322	0.22444	0.433935
ENSMUSG00000004933	Matk	0.00017194	0.000283188	0.199811	0.025092	0.3524	0.2386	0.497359	0.472554
ENSMUSG00000057455	Rit2	0.00017273	0.000159743	0.276954	0.0153893	0.728	0.659	1	0	SFARI					2	0
ENSMUSG00000026482	Rgl1	0.000175463	0.000245395	0.248011	0.032527	0.2854	0.1766	0.498979	0.492529
ENSMUSG00000038257	Glra3	0.000190135	0.000211997	0.137457	0.0148013	0.1324	0.058	0.865761	0.300167
ENSMUSG00000024245	Tmem178	0.000203592	0.000263871	-0.197442	0.0177981	0.1784	0.2842	0.861968	0.215087
ENSMUSG00000067028	Cntnap5b	0.000204403	0.000235462	0.290733	0.0610701	0.5318	0.4072	0.811981	0.420424
ENSMUSG00000115783	Bc1	0.000206133	0.00020855	0.135342	0.0341589	0.122	0.0492	0.654678	0.474714
ENSMUSG00000085454	Grip1os3	0.000206912	0.000179386	-0.10234	0.0127761	0.05	0.1192	0.881847	0.264198
ENSMUSG00000054733	Msra	0.000213379	0.000324604	-0.283631	0.0203565	0.4148	0.533	0.699039	0.412121	SFARI					3	0
ENSMUSG00000062372	Otof	0.000214391	0.000287955	0.160359	0.0185248	0.1348	0.0594	0.818052	0.30352
ENSMUSG00000008575	Nfib	0.000232018	0.000215571	-0.416697	0.0662021	0.3668	0.4862	0.652292	0.480877	SFARI					2	1
ENSMUSG00000031673	Cdh11	0.000235715	0.000239296	-0.305515	0.0284473	0.3314	0.4438	1	0	SFARI					2	0
ENSMUSG00000044229	Nxpe4	0.000237258	0.00042145	-0.200848	0.0146563	0.1426	0.2412	0.741314	0.360501
ENSMUSG00000050711	Scg2	0.000237368	0.000148823	0.171676	0.0185264	0.5	0.3798	1	0
ENSMUSG00000052726	Kcnt2	0.000242582	0.000199194	-0.368438	0.042483	0.3924	0.4984	1	0
ENSMUSG00000002107	Celf2	0.000243088	0.000474552	0.306524	0.0651608	0.9816	0.9722	0.418293	0.532163	SFARI					2	1
ENSMUSG00000043388	Tmem130	0.000250428	0.000236806	0.236464	0.0116467	0.525	0.429	1	0
ENSMUSG00000004961	Syt5	0.000259641	0.000366914	0.140559	0.0167584	0.1796	0.0924	0.742494	0.402776
ENSMUSG00000021217	Tshz3	0.000260515	0.000398656	-0.170577	0.0124979	0.1542	0.256	0.772162	0.284636	SFARI					1	0
ENSMUSG00000039145	Camk1d	0.00026665	0.000319259	0.211509	0.0196032	0.9464	0.8956	1	0
ENSMUSG00000025551	Fgf14	0.000281779	0.000335106	0.165747	0.0147732	1	1	0.875902	0.277491	SFARI					3	0
ENSMUSG00000000305	Cdh4	0.000283382	0.000376464	0.28997	0.0382869	0.5288	0.4302	0.820226	0.401986
ENSMUSG00000037416	Dmxl1	0.000283556	0.000322224	-0.21194	0.0205359	0.7688	0.8304	0.827918	0.384786
ENSMUSG00000005986	Ankrd13d	0.000285774	0.000509594	0.186857	0.0289454	0.4396	0.3282	0.805674	0.434527
ENSMUSG00000015002	Efr3a	0.000286339	0.000386061	-0.188691	0.0277918	0.3048	0.4262	0.682585	0.438107	SFARI					2	0
ENSMUSG00000033676	Gabrb3	0.000293461	0.000354604	0.268212	0.0499046	0.9318	0.9244	0.800038	0.447129	SFARI					1	0
ENSMUSG00000028782	Adgrb2	0.000305885	0.000327245	0.14547	0.0144087	0.165	0.0854	0.821897	0.398249
ENSMUSG00000061013	Mkx	0.000319222	0.00044863	-0.178839	0.0357908	0.3188	0.452	0.810622	0.423463	SFARI;EAGLE;TADA	0.0428521	Limited	0.3	Discordant	1	0
ENSMUSG00000028019	Pdgfc	0.000323753	0.00045729	0.125936	0.0167027	0.1106	0.0426	0.703276	0.406837
ENSMUSG00000109121	Gm44644	0.000333656	0.000581551	0.110243	0.0178113	0.1258	0.0498	0.493106	0.476372
ENSMUSG00000047935	Sox1ot	0.000339735	0.000475925	-0.183594	0.0320543	0.1224	0.2158	0.811065	0.422472
ENSMUSG00000039620	Trmt9b	0.000344439	0.000266182	-0.101409	0.0133354	0.0622	0.1328	1	0
ENSMUSG00000022311	Csmd3	0.00035436	0.00062101	0.228864	0.0315256	0.9588	0.915	0.86867	0.293663	SFARI					3	0
ENSMUSG00000014592	Camta1	0.00035626	0.000436443	0.181278	0.0234368	0.9008	0.8526	0.8885	0.249322
ENSMUSG00000003814	Calr	0.000361605	0.000368032	0.183964	0.0109143	0.3908	0.2934	1	0
ENSMUSG00000000794	Kcnn3	0.000366363	0.000535318	0.126829	0.00926945	0.1972	0.1096	1	0
ENSMUSG00000045659	Plekha7	0.000386225	0.000328392	0.160081	0.0146687	0.262	0.166	0.883089	0.261422
ENSMUSG00000022377	Asap1	0.00041174	0.000815267	-0.254078	0.0386564	0.5444	0.6484	0.566461	0.413807
ENSMUSG00000028552	Eps15	0.000412919	0.0006174	-0.166473	0.0222734	0.2836	0.3968	0.897493	0.229212
ENSMUSG00000039218	Srrm2	0.000425334	0.000340909	0.145048	0.0199217	0.9172	0.884	0.921379	0.175801	SFARI					2	1
ENSMUSG00000007783	Cpt1c	0.000432777	0.000408938	0.194091	0.0216416	0.5786	0.4784	0.84526	0.346008
ENSMUSG00000052387	Trpm3	0.000453942	0.000360727	0.323134	0.0449622	0.4482	0.328	1	0
ENSMUSG00000036095	Dgkb	0.00045815	0.00037132	0.206831	0.03356	0.8344	0.7704	1	0
ENSMUSG00000040936	Ulk4	0.000460602	0.00064753	0.158807	0.0169204	0.3024	0.2022	1	0
ENSMUSG00000028532	Cachd1	0.000492196	0.000918505	0.170435	0.0182258	0.1328	0.0602	0.819146	0.313892
ENSMUSG00000022332	Khdrbs3	0.000493619	0.00049608	-0.220811	0.0285906	0.4006	0.5022	0.989583	0.023293
ENSMUSG00000041670	Rims1	0.000500729	0.000382625	-0.216894	0.0313841	0.9612	0.973	1	0	SFARI;EAGLE		Moderate	11.35	Discordant	1	0
ENSMUSG00000025006	Sorbs1	0.000507455	0.00057404	-0.210031	0.0408101	0.6984	0.7758	0.804653	0.43681
ENSMUSG00000013236	Ptprs	0.000510502	0.000582969	0.199834	0.0242344	0.7772	0.6774	0.820255	0.401922
ENSMUSG00000046432	Bex3	0.000533905	0.000606029	0.14201	0.0134233	0.2288	0.1388	0.907956	0.205817
ENSMUSG00000035189	Ano4	0.000534125	0.000505235	-0.248517	0.0252062	0.4962	0.602	1	0
ENSMUSG00000109321	A330076H08Rik	0.000578427	0.000748009	-0.152794	0.0274787	0.734	0.8244	1	0
ENSMUSG00000057182	Scn3a	0.000582393	0.000693609	0.221229	0.0416612	0.5714	0.4674	0.755012	0.358798
ENSMUSG00000022180	Slc7a8	0.000595155	0.000861779	-0.13093	0.0161892	0.146	0.2384	0.967611	0.0724248
ENSMUSG00000010803	Gabra1	0.000596092	0.000558081	-0.22442	0.0219175	0.3222	0.4302	1	0	TADA	0.00029434
ENSMUSG00000034160	Ogt	0.000597232	0.000959068	-0.192536	0.030423	0.7942	0.8666	0.802917	0.440691
ENSMUSG00000040037	Negr1	0.000599704	0.00114973	0.196195	0.0283375	0.9576	0.944	0.756887	0.388776	SFARI					2	0
ENSMUSG00000030064	Frmd4b	0.000602401	0.00132705	-0.210382	0.0441892	0.2042	0.3182	0.416294	0.350952
ENSMUSG00000035934	Pknox2	0.000635352	0.000528947	-0.183548	0.0113599	0.2704	0.3736	1	0
ENSMUSG00000062991	Nrg1	0.000657192	0.00120225	0.266569	0.0796658	0.7424	0.6264	0.969984	0.0671188
ENSMUSG00000042348	Arl15	0.000658427	0.00119789	-0.242846	0.0344627	0.5962	0.6726	0.826291	0.388425
ENSMUSG00000004980	Hnrnpa2b1	0.000663793	0.000665363	0.176128	0.0191516	0.7956	0.7398	1	0
ENSMUSG00000021613	Hapln1	0.000694103	0.000377507	-0.12241	0.00831526	0.0714	0.1406	1	0
ENSMUSG00000004207	Psap	0.00069895	0.000921986	0.205726	0.0303921	0.5586	0.4624	0.745139	0.415716
ENSMUSG00000041650	Pcca	0.000708942	0.000936213	-0.187186	0.0260383	0.4798	0.5876	0.847254	0.341551	SFARI						1
ENSMUSG00000002477	Snrpd1	0.00076464	0.000944477	-0.0961297	0.0119419	0.0642	0.1318	1	0
ENSMUSG00000035545	Leng8	0.000794074	0.00169742	0.185286	0.0368347	0.595	0.478	0.659046	0.470392
ENSMUSG00000040028	Elavl1	0.000797128	0.00115517	-0.11657	0.00929016	0.157	0.2494	1	0
ENSMUSG00000102362	4930509J09Rik	0.000823241	0.000684889	-0.215387	0.0110587	0.1102	0.1878	1	0
ENSMUSG00000046178	Nxph1	0.000835577	0.00140651	-0.157273	0.035364	0.655	0.7814	0.998119	0.00420604	SFARI					2	0
ENSMUSG00000020256	Aldh1l2	0.000856174	0.00110109	-0.0961024	0.0104837	0.0542	0.1168	1	0
ENSMUSG00000024236	Svil	0.000900987	0.000803427	-0.137118	0.014523	0.0532	0.117	1	0
ENSMUSG00000056999	Ide	0.000948874	0.00163569	-0.161735	0.0152889	0.5022	0.6166	1	0
ENSMUSG00000084968	Gm12743	0.000976421	0.000848804	-0.0926636	0.00931144	0.0702	0.1384	1	0
ENSMUSG00000050334	C130071C03Rik	0.000998393	0.00148404	-0.22564	0.0130179	0.692	0.7742	1	0
ENSMUSG00000058153	Sez6l	0.00100391	0.0021553	0.193639	0.0408188	0.429	0.2966	0.605692	0.539961
ENSMUSG00000027195	Hsd17b12	0.00101891	0.000786959	-0.135028	0.00927617	0.2248	0.3214	1	0
ENSMUSG00000052146	Rps10	0.00103808	0.000573645	0.0881242	0.00470771	0.1146	0.0548	1	0
ENSMUSG00000107872	Gm44511	0.00104703	0.0010709	0.184035	0.0338218	0.5458	0.457	0.806098	0.433577
ENSMUSG00000025920	Stau2	0.00104742	0.00105785	-0.15467	0.0128005	0.7544	0.8118	1	0
ENSMUSG00000021910	Nisch	0.00105725	0.00119587	0.192994	0.0173788	0.6034	0.5334	1	0
ENSMUSG00000006373	Pgrmc1	0.0010764	0.000791021	0.141372	0.0144604	0.3004	0.2066	1	0
ENSMUSG00000037795	N4bp2	0.0010785	0.00139045	0.170608	0.0116549	0.2594	0.1694	1	0
ENSMUSG00000035067	Xkr6	0.00113644	0.00101144	0.197722	0.0164831	0.847	0.7986	1	0
ENSMUSG00000041836	Ptpre	0.00113736	0.00200177	-0.154511	0.0139435	0.161	0.252	1	0
ENSMUSG00000032443	Zcwpw2	0.00116838	0.000542579	-0.103655	0.00658192	0.1212	0.2006	1	0
ENSMUSG00000032936	Camkv	0.00121741	0.00173405	0.208191	0.0200702	0.3164	0.22	0.927418	0.162298
ENSMUSG00000058301	Upf1	0.0012177	0.00124347	0.103886	0.0165774	0.1578	0.0846	0.868454	0.294146
ENSMUSG00000023089	Ndufa5	0.00122042	0.00132625	0.115918	0.00747427	0.1778	0.103	1	0	SFARI					2	0
ENSMUSG00000022708	Zbtb20	0.0012862	0.00229467	0.23859	0.0238247	0.6988	0.5932	1	0	SFARI					1	1
ENSMUSG00000032532	Cck	0.00130782	0.00243912	-0.215514	0.0380097	0.0624	0.1326	0.822317	0.397311
ENSMUSG00000058740	Kcnt1	0.00130891	0.000983427	0.169777	0.0118033	0.514	0.4186	1	0
ENSMUSG00000101299	Gm28175	0.0013291	0.000995504	-0.133311	0.00652205	0.0862	0.1558	1	0
ENSMUSG00000031997	Trpc6	0.00135131	0.00156862	-0.225063	0.0275266	0.2054	0.2968	1	0	SFARI;EAGLE		Moderate	7.2	Concordant	2	0
ENSMUSG00000014313	Cox6c	0.0013523	0.00164035	0.167053	0.0219277	0.3214	0.2276	1	0
ENSMUSG00000021690	Jmy	0.00136916	0.00165037	-0.135876	0.0185016	0.1756	0.2682	0.971913	0.0628053
ENSMUSG00000040414	Slc25a28	0.00140422	0.00248166	-0.097971	0.0159969	0.106	0.187	1	0
ENSMUSG00000028152	Tspan5	0.00146958	0.000760018	-0.194172	0.0231645	0.5942	0.6646	1	0
ENSMUSG00000057897	Camk2b	0.00147793	0.00188876	0.189541	0.0307559	0.4598	0.3662	1	0	SFARI						1
ENSMUSG00000059974	Ntm	0.00149303	0.00320513	-0.319398	0.0613671	0.7938	0.8468	0.711621	0.403768
ENSMUSG00000032174	Icam5	0.00150763	0.00119213	0.0954283	0.00626507	0.1118	0.0538	1	0
ENSMUSG00000031772	Cntnap4	0.00151539	0.00215434	-0.286943	0.0285288	0.595	0.6736	1	0	SFARI					2	0
ENSMUSG00000058145	Adamts17	0.00153394	0.00232582	-0.172446	0.0285437	0.3466	0.4592	1	0
ENSMUSG00000019943	Atp2b1	0.00157396	0.00202418	0.228739	0.0508326	0.6956	0.6126	0.979832	0.0450961	SFARI					3	0
ENSMUSG00000057716	Tmem178b	0.0016163	0.00134994	0.179047	0.0163195	0.9436	0.9086	1	0
ENSMUSG00000039278	Pcsk1n	0.00163345	0.00176471	0.227719	0.0242178	0.6474	0.5776	1	0
ENSMUSG00000022523	Fgf12	0.00177504	0.00207696	-0.210642	0.0395227	0.9928	0.9936	0.858508	0.316385
ENSMUSG00000029819	Npy	0.00180121	0.00222986	-0.034329	0.0982499	0.1956	0.3054	0.917166	0.185222
ENSMUSG00000115337	4930570B17Rik	0.00180543	0.00258044	-0.0971931	0.0130872	0.077	0.1442	1	0
ENSMUSG00000011751	Sptbn4	0.00180756	0.0023756	0.151862	0.0220863	0.5908	0.4884	1	0
ENSMUSG00000010086	Rnf112	0.00186259	0.00265266	0.16227	0.0166751	0.2732	0.185	1	0
ENSMUSG00000014932	Yes1	0.00188207	0.00225155	-0.121517	0.0320139	0.1784	0.2724	0.869993	0.290704
ENSMUSG00000028229	Rmdn1	0.00188209	0.00262923	-0.154093	0.0278172	0.5106	0.6288	1	0
ENSMUSG00000033066	Gas7	0.00188927	0.0016885	-0.201673	0.0200174	0.2008	0.2894	1	0
ENSMUSG00000031355	Arhgap6	0.0018945	0.00319688	0.43619	0.0346974	0.2272	0.1432	0.955926	0.0838802
ENSMUSG00000027668	Mfn1	0.00191202	0.00301849	-0.178688	0.0158628	0.5056	0.5962	1	0
ENSMUSG00000069769	Msi2	0.00191918	0.00150171	-0.164968	0.0223135	0.668	0.7812	1	0
ENSMUSG00000004366	Sst	0.00194155	0.00341085	-0.134099	0.100475	0.2026	0.3104	0.892316	0.240789
ENSMUSG00000035885	Cox8a	0.00196826	0.00134424	0.161257	0.0131662	0.377	0.2868	1	0
ENSMUSG00000000416	Cttnbp2	0.00197128	0.00183992	-0.185721	0.0111977	0.5962	0.6918	1	0	SFARI					2	0
ENSMUSG00000022378	Cyrib	0.0020115	0.00284118	-0.164922	0.0195032	0.6858	0.768	1	0
ENSMUSG00000108867	Gm44643	0.00202643	0.00241349	0.14349	0.023392	0.1984	0.1194	0.874092	0.281539
ENSMUSG00000070880	Gad1	0.00204295	0.0037345	-0.171142	0.0335089	0.5314	0.6598	1	0
ENSMUSG00000020042	Btbd11	0.00206793	0.00223561	-0.267275	0.0203126	0.3118	0.39	1	0
ENSMUSG00000042453	Reln	0.0020958	0.00111056	-0.440644	0.074045	0.182	0.2576	1	0	SFARI;EAGLE		Disputed	7.2; contradictory evidence	Discordant	1	0
ENSMUSG00000040852	Plekhh2	0.00211151	0.00211054	-0.109456	0.0228038	0.2464	0.3466	1	0
ENSMUSG00000027546	Atp9a	0.00216212	0.0019437	0.174644	0.025961	0.4104	0.3166	0.86166	0.309337
ENSMUSG00000053519	Kcnip1	0.00218767	0.00221327	-0.239979	0.0353113	0.4902	0.5784	1	0
ENSMUSG00000032855	Pkd1	0.00219047	0.00364747	0.19617	0.0243953	0.5798	0.4932	0.970145	0.0667574
ENSMUSG00000026393	Nek7	0.00224113	0.00230045	-0.140966	0.0311244	0.1434	0.2268	1	0
ENSMUSG00000030854	Ptpn5	0.00229384	0.00284867	0.205489	0.0196337	0.4076	0.3272	1	0
ENSMUSG00000021730	Hcn1	0.00231274	0.00261342	-0.183561	0.0296887	0.7524	0.861	1	0	SFARI						1
ENSMUSG00000042410	Agps	0.00231558	0.00290246	-0.170766	0.0331909	0.2886	0.3868	0.80418	0.437866
ENSMUSG00000040565	Btaf1	0.00235177	0.000612185	-0.142779	0.00360811	0.546	0.6348	1	0	SFARI					2	0
ENSMUSG00000109006	B230209E15Rik	0.00237731	0.00221539	0.213134	0.0281773	0.4568	0.3726	1	0
ENSMUSG00000026058	Khdrbs2	0.00240405	0.00458939	0.346156	0.0600014	0.3532	0.258	0.870228	0.290178	SFARI					2	0
ENSMUSG00000022240	Ctnnd2	0.00245555	0.001352	-0.156962	0.010396	0.9838	0.9894	1	0	SFARI					2	0
ENSMUSG00000073678	Pgap1	0.00249506	0.00289509	0.195822	0.0323764	0.3846	0.29	0.843718	0.349458
ENSMUSG00000025025	Mxi1	0.00249506	0.00217716	-0.113016	0.0128487	0.1188	0.1922	1	0
ENSMUSG00000003411	Rab3b	0.00254141	0.00308961	-0.143613	0.0343829	0.1606	0.2492	0.83884	0.360364
ENSMUSG00000032537	Ephb1	0.00257394	0.00343465	0.205542	0.0394678	0.2664	0.1752	0.811884	0.258241	SFARI					3	0
ENSMUSG00000032411	Tfdp2	0.00261302	0.00250021	-0.159077	0.00722314	0.3552	0.4476	1	0
ENSMUSG00000040387	Klhl32	0.00263984	0.00276797	-0.190049	0.0283147	0.5786	0.677	1	0
ENSMUSG00000049044	Rapgef4	0.00267133	0.00328818	-0.169583	0.0345947	0.7322	0.8242	1	0	SFARI					2	0
ENSMUSG00000024830	Rps6kb2	0.0026834	0.00125226	0.149799	0.0102543	0.3746	0.2934	1	0
ENSMUSG00000070047	Fat1	0.00269601	0.00507424	0.175857	0.0166068	0.1752	0.1014	1	0	SFARI					2	0
ENSMUSG00000018474	Chd3	0.00272395	0.00430701	0.193651	0.0216891	0.3432	0.2562	1	0	SFARI					1	1
ENSMUSG00000032087	Dscaml1	0.00273037	0.00282134	-0.191364	0.0159272	0.546	0.6378	1	0
ENSMUSG00000114504	Gm48321	0.00273694	0.00244932	-0.0981094	0.0168309	0.1244	0.2022	1	0
ENSMUSG00000106379	Lhfpl3	0.00274114	0.00454924	0.301243	0.12222	0.581	0.4688	0.771315	0.435414
ENSMUSG00000032624	Eml4	0.00280595	0.0024372	-0.153971	0.0258868	0.445	0.5334	1	0
ENSMUSG00000034912	Mdga2	0.00281998	0.00407427	0.156034	0.0201495	0.9988	0.998	1	0	SFARI					2	0
ENSMUSG00000050965	Prkca	0.00282754	0.00335187	-0.291001	0.0248523	0.5598	0.6354	1	0	SFARI					2	0
ENSMUSG00000023826	Prkn	0.00289068	0.00635082	-0.193898	0.0557745	0.8812	0.9376	0.668878	0.453674	SFARI					2	0
ENSMUSG00000089934	4930473D10Rik	0.0029133	0.00430328	-0.108673	0.0382564	0.0666	0.1322	0.881942	0.263985
ENSMUSG00000026305	Lrrfip1	0.00292697	0.00343127	-0.140906	0.0235975	0.463	0.5478	1	0
ENSMUSG00000050321	Neto1	0.00293127	0.00359793	-0.30286	0.0187553	0.5556	0.6226	1	0
ENSMUSG00000031505	Naxd	0.00296394	0.00188993	-0.0917311	0.0066522	0.094	0.1582	1	0
ENSMUSG00000028412	Slc44a1	0.00298909	0.00316903	-0.102243	0.0107818	0.3562	0.4696	1	0
ENSMUSG00000098202	B830012L14Rik	0.00299121	0.00337685	0.152496	0.0293325	0.8704	0.8332	1	0
ENSMUSG00000061175	Fnip2	0.00299244	0.00295422	-0.141173	0.0143657	0.2842	0.3802	1	0
ENSMUSG00000068740	Celsr2	0.00303229	0.00358712	0.125402	0.017207	0.2502	0.1686	1	0
ENSMUSG00000037266	Rsrp1	0.00305532	0.00258179	-0.163622	0.0276737	0.7036	0.7734	1	0
ENSMUSG00000026090	Cracdl	0.00307597	0.00329148	0.147517	0.0198379	0.143	0.0802	1	0
ENSMUSG00000034997	Htr2a	0.00312223	0.00370428	-0.067261	0.0165439	0.058	0.1192	1	0
ENSMUSG00000019775	Rgs17	0.00313014	0.00306588	0.162194	0.0303321	0.521	0.422	1	0
ENSMUSG00000089706	B230216N24Rik	0.00314658	0.00602227	-0.105624	0.0207747	0.1162	0.1972	1	0
ENSMUSG00000000560	Gabra2	0.00315739	0.00656316	0.321372	0.0501536	0.6532	0.5838	1	0
ENSMUSG00000073565	Prr16	0.00319573	0.00687924	0.260352	0.0628645	0.4876	0.3684	0.691877	0.42197
ENSMUSG00000097156	Gm3764	0.00322584	0.00333144	-0.145279	0.0181315	0.2878	0.3792	1	0
ENSMUSG00000051065	Mb21d2	0.00326029	0.00241302	0.0809942	0.0192379	0.2328	0.1524	1	0
ENSMUSG00000098274	Rpl24	0.00326729	0.00250022	0.121569	0.00657319	0.1464	0.0866	1	0
ENSMUSG00000044250	Pced1b	0.00327985	0.0034769	0.106823	0.0150547	0.233	0.155	1	0
ENSMUSG00000031906	Smpd3	0.00331611	0.00247264	0.134425	0.0108748	0.268	0.1878	1	0
ENSMUSG00000038128	Camk4	0.00334686	0.00527745	0.193208	0.0485953	0.4316	0.3266	0.952105	0.107097	SFARI					2	0
ENSMUSG00000059401	Mamld1	0.00339034	0.0029022	-0.133788	0.0309624	0.2256	0.3116	1	0
ENSMUSG00000072294	Klf12	0.00347775	0.00387484	-0.168764	0.046097	0.8072	0.8932	0.859313	0.314585
ENSMUSG00000068205	Macrod2	0.00350068	0.00301081	0.150827	0.0153669	0.9876	0.9818	1	0	SFARI					2	0
ENSMUSG00000036466	Megf11	0.00357363	0.0026076	0.178675	0.0228117	0.2168	0.144	1	0	SFARI					2	0
ENSMUSG00000055109	Gm15155	0.00360965	0.00182976	0.216444	0.0159229	0.248	0.1744	1	0	SFARI;EAGLE		Definitive	17.6	Discordant	2	0
ENSMUSG00000019990	Pde7b	0.00361218	0.0040942	0.210276	0.0668162	0.2586	0.1748	1	0
ENSMUSG00000022885	St6gal1	0.00365515	0.0029719	-0.116331	0.0250464	0.1214	0.1928	1	0
ENSMUSG00000092196	Gm38505	0.00366829	0.00406152	-0.230411	0.099582	0.2444	0.3412	1	0
ENSMUSG00000101693	Gm19461	0.00368318	0.00430952	0.0887876	0.0111025	0.1464	0.0842	1	0
ENSMUSG00000028833	Ncdn	0.00369644	0.005118	0.140168	0.0265705	0.2192	0.1386	0.847214	0.341641
ENSMUSG00000033063	Cntnap3	0.0037578	0.00498043	-0.151091	0.018598	0.3724	0.4824	1	0	SFARI					2	0
ENSMUSG00000030695	Aldoa	0.00377712	0.00586046	0.177596	0.0287161	0.3954	0.31	1	0
ENSMUSG00000028926	Cdk14	0.0038053	0.00624012	-0.156826	0.0377539	0.5122	0.6068	1	0
ENSMUSG00000097392	Thoc2l	0.00383153	0.00471917	-0.129031	0.0216303	0.2636	0.353	1	0
ENSMUSG00000021676	Iqgap2	0.00383256	0.00240644	-0.175322	0.0499303	0.1308	0.2006	1	0
ENSMUSG00000034730	Adgrb1	0.0038504	0.00598108	0.150577	0.025511	0.3442	0.2548	1	0
ENSMUSG00000096929	A330023F24Rik	0.0039248	0.00254225	0.157437	0.0124491	0.8548	0.8414	1	0
ENSMUSG00000036766	Dner	0.00397817	0.00418518	-0.171652	0.0209085	0.6614	0.74	1	0	SFARI					2	0
ENSMUSG00000029178	Klf3	0.00401248	0.00562462	-0.0823125	0.0144691	0.0662	0.1256	1	0
ENSMUSG00000022540	Rogdi	0.00402336	0.00592412	0.0990329	0.00970044	0.2026	0.129	1	0
ENSMUSG00000052512	Nav2	0.00415874	0.00522195	-0.155921	0.0336215	0.7934	0.8666	1	0	SFARI					2	0
ENSMUSG00000026469	Xpr1	0.00421846	0.00437178	0.18978	0.0245863	0.542	0.4656	1	0
ENSMUSG00000038860	Garnl3	0.00422367	0.0025942	-0.185026	0.0260816	0.454	0.5392	1	0
ENSMUSG00000055471	Alk	0.00422717	0.00895878	-0.227619	0.0477754	0.5538	0.6668	0.853793	0.205775
ENSMUSG00000043259	Fam13c	0.00427598	0.00534563	-0.128146	0.0475167	0.2756	0.3726	0.816874	0.409482
ENSMUSG00000067925	Rtl8a	0.00429188	0.00446441	0.108708	0.0140221	0.1906	0.1218	1	0
ENSMUSG00000042249	Grk3	0.00429683	0.00179673	-0.13628	0.00780219	0.377	0.4732	1	0
ENSMUSG00000039546	Ajap1	0.00434242	0.0036821	0.13069	0.0161022	0.213	0.1408	1	0
ENSMUSG00000038068	Rnf144b	0.00439509	0.00399939	-0.137709	0.01983	0.185	0.267	1	0
ENSMUSG00000079658	Eloc	0.00446043	0.00626488	-0.0799186	0.0102776	0.0842	0.1476	1	0
ENSMUSG00000063887	Nlgn1	0.00447691	0.0042828	0.384666	0.0390684	0.8672	0.7898	1	0	SFARI					2	0
ENSMUSG00000059602	Syn3	0.00448068	0.00489716	0.170591	0.0265165	0.4482	0.3646	1	0
ENSMUSG00000072966	Gprasp2	0.00449496	0.00340695	0.132014	0.0157841	0.431	0.344	1	0
ENSMUSG00000031285	Dcx	0.00450294	0.00458997	-0.139009	0.0120483	0.36	0.4606	1	0
ENSMUSG00000018796	Acsl1	0.00451993	0.00397467	-0.109769	0.0178094	0.2066	0.2958	1	0
ENSMUSG00000037306	Man1c1	0.00454153	0.00303247	-0.125151	0.0261676	0.2132	0.2962	1	0
ENSMUSG00000051934	Spats2	0.00456155	0.00509659	-0.135592	0.029871	0.159	0.2388	0.979194	0.0465228
ENSMUSG00000110067	6330411D24Rik	0.00459736	0.00392403	-0.256063	0.0380734	0.2236	0.2938	1	0
ENSMUSG00000042750	Bex2	0.00461902	0.00620353	0.141374	0.0211733	0.2596	0.1784	1	0
ENSMUSG00000047454	Gphn	0.00464198	0.00446377	0.160535	0.0281927	0.9714	0.9548	1	0	SFARI					2	0
ENSMUSG00000060882	Kcnd2	0.00464357	0.00446578	0.147653	0.0399071	0.9786	0.8978	1	0	SFARI					2	0
ENSMUSG00000022208	Jph4	0.00474048	0.00795763	0.166434	0.0247735	0.3202	0.2364	1	0
ENSMUSG00000040268	Plekha1	0.00478603	0.00728149	-0.141029	0.0182746	0.2814	0.3682	1	0
ENSMUSG00000027164	Traf6	0.00478804	0.00622246	-0.0753855	0.0169971	0.0602	0.121	1	0
ENSMUSG00000030222	Rerg	0.0048502	0.00684657	0.12556	0.0195018	0.1908	0.1196	1	0
ENSMUSG00000045573	Penk	0.00489193	0.00452613	0.175152	0.0308053	0.2038	0.1306	1	0
ENSMUSG00000018770	Atp5g3	0.0048995	0.00691343	0.128886	0.0141663	0.2746	0.195	1	0
ENSMUSG00000070802	Pnma8b	0.00494208	0.00419405	0.0963222	0.00586604	0.1184	0.0658	1	0
ENSMUSG00000045349	Sh2d5	0.00496123	0.00783136	0.144615	0.0169377	0.1874	0.1196	1	0
ENSMUSG00000033569	Adgrb3	0.0049757	0.00471383	0.159908	0.0422224	0.9794	0.9598	1	0
ENSMUSG00000046679	C87436	0.0049989	0.00436801	-0.0966345	0.0104969	0.0936	0.1552	1	0
ENSMUSG00000087201	Gm15261	0.00503219	0.00571038	0.197377	0.0157185	0.121	0.0658	1	0
ENSMUSG00000032328	Tmem30a	0.00510933	0.0037372	0.152883	0.0170616	0.3318	0.254	1	0
ENSMUSG00000040710	St8sia4	0.00531532	0.00633259	-0.177373	0.0301631	0.2604	0.353	1	0
ENSMUSG00000030428	Ttyh1	0.00537056	0.00542554	0.125644	0.0216093	0.2792	0.2	1	0
ENSMUSG00000063919	Srrm4	0.00545575	0.00438675	-0.148603	0.0131343	0.449	0.5344	1	0
ENSMUSG00000044071	Tafa2	0.00546845	0.0041255	-0.273886	0.025591	0.48	0.5928	1	0
ENSMUSG00000039210	Gpatch2	0.00549838	0.00466792	-0.0917958	0.014251	0.2054	0.2926	1	0
ENSMUSG00000028137	Celf3	0.00551095	0.00837685	0.138579	0.0201074	0.2626	0.1836	1	0
ENSMUSG00000027016	Zfp385b	0.00551921	0.00475604	-0.250118	0.0469655	0.6012	0.6632	1	0	SFARI					2	0
ENSMUSG00000069072	Slc7a14	0.0055395	0.00521008	-0.17169	0.0441536	0.3068	0.3946	1	0
ENSMUSG00000021067	Sav1	0.00557037	0.00893912	-0.074715	0.011616	0.0586	0.113	1	0
ENSMUSG00000032076	Cadm1	0.00568071	0.00568775	0.226078	0.027937	0.8028	0.783	1	0	SFARI					2	0
ENSMUSG00000085439	Rapgef4os1	0.0056983	0.00468553	-0.108637	0.0141928	0.1858	0.2636	1	0
ENSMUSG00000025909	Sntg1	0.00570322	0.00385524	-0.276574	0.0336949	0.917	0.9188	1	0
ENSMUSG00000090223	Pcp4	0.00579855	0.00425785	0.145638	0.0160799	0.2686	0.1932	1	0
ENSMUSG00000039001	Rps21	0.0059642	0.00888773	0.142302	0.0159241	0.2154	0.1452	1	0
ENSMUSG00000042817	Flt3	0.00597512	0.00786767	-0.106628	0.0267614	0.136	0.2124	1	0
ENSMUSG00000034402	Kcnh5	0.00604494	0.00417535	0.0954563	0.0300988	0.1726	0.1072	1	0
ENSMUSG00000034755	Pcdh11x	0.00611144	0.00749139	0.33351	0.10627	0.4426	0.3528	1	0	SFARI					2	0
ENSMUSG00000035133	Arhgap5	0.00622521	0.003864	-0.224096	0.0268332	0.5826	0.6476	1	0	SFARI					2	0
ENSMUSG00000049583	Grm5	0.00623002	0.00628384	0.19537	0.0311777	0.9374	0.9262	1	0	SFARI					2	0
ENSMUSG00000039057	Myo16	0.00630768	0.00653538	-0.240234	0.0281255	0.3736	0.4452	1	0	SFARI					2	0
ENSMUSG00000039740	Alg2	0.00634569	0.00449662	0.081596	0.00812722	0.1582	0.098	1	0
ENSMUSG00000032570	Atp2c1	0.00640129	0.00970532	-0.186396	0.0381235	0.5448	0.6442	0.93259	0.101276
ENSMUSG00000038181	Chpf2	0.00640333	0.00893683	0.131976	0.0219715	0.259	0.1778	1	0
ENSMUSG00000033307	Mif	0.00653727	0.0037826	0.128048	0.00670676	0.215	0.1514	1	0
ENSMUSG00000072772	Grcc10	0.00655055	0.00242859	0.0737873	0.00584938	0.107	0.058	1	0	SFARI						1
ENSMUSG00000009569	Mrtfb	0.00658983	0.00659965	0.208694	0.00784655	0.4728	0.405	1	0	SFARI					2	0
ENSMUSG00000025145	Lrrc45	0.00663788	0.00984084	0.112738	0.0161584	0.2322	0.1594	1	0
ENSMUSG00000086363	A330102I10Rik	0.00670595	0.00404679	-0.114005	0.0113236	0.2276	0.3048	1	0
ENSMUSG00000023944	Hsp90ab1	0.00671412	0.0106913	0.201215	0.0360831	0.5766	0.4996	1	0
ENSMUSG00000049321	Zfp2	0.00674857	0.00803579	-0.0908021	0.0248136	0.0872	0.1504	1	0
ENSMUSG00000030616	Sytl2	0.00684486	0.00572113	-0.0852994	0.0146711	0.0832	0.1406	1	0
ENSMUSG00000028811	Yars	0.00687821	0.00518701	-0.0900166	0.0115409	0.1588	0.2306	1	0
ENSMUSG00000028898	Trnau1ap	0.00689862	0.00892409	0.0862129	0.013123	0.2556	0.1754	1	0
ENSMUSG00000052713	Zfp608	0.00694323	0.00765976	-0.161614	0.0440304	0.556	0.651	0.990492	0.0212596
ENSMUSG00000022454	Nell2	0.0069573	0.00995376	0.143338	0.0496721	0.3638	0.272	1	0
ENSMUSG00000015745	Plekho1	0.00699999	0.00739388	-0.10658	0.0256915	0.1146	0.1848	1	0
ENSMUSG00000036270	Edc4	0.00709991	0.00530965	0.120087	0.00997611	0.2418	0.1708	1	0
ENSMUSG00000025422	Agap2	0.00715675	0.0131865	0.111676	0.0242316	0.187	0.114	1	0	SFARI					2	0
ENSMUSG00000026781	Acbd5	0.00716758	0.00531335	-0.132257	0.0155489	0.2962	0.3748	1	0
ENSMUSG00000032468	Armc8	0.00718207	0.00451206	-0.124182	0.0152092	0.3482	0.4318	1	0
ENSMUSG00000061028	Clasrp	0.00719935	0.00581148	0.119258	0.0123298	0.3146	0.2384	1	0
ENSMUSG00000112964	E430024I08Rik	0.00723351	0.00492725	-0.0743598	0.00775168	0.0718	0.125	1	0
ENSMUSG00000029276	Glmn	0.00724313	0.00322149	-0.0950472	0.0119039	0.1692	0.2398	1	0
ENSMUSG00000021493	Pdlim7	0.00724348	0.00568077	0.115897	0.0109559	0.2172	0.1498	1	0
ENSMUSG00000004637	Wwox	0.00741425	0.00620135	-0.153399	0.0302783	0.6838	0.7444	1	0	SFARI					2	0
ENSMUSG00000038844	Kif16b	0.00743645	0.00356904	-0.134072	0.0129965	0.3782	0.4566	1	0
ENSMUSG00000036097	Slf2	0.00745093	0.00774447	-0.132541	0.0311789	0.4594	0.5504	1	0
ENSMUSG00000029673	Auts2	0.00748371	0.00896872	-0.118662	0.0212532	0.9726	0.977	1	0	SFARI;EAGLE;TADA	0.0046251	Definitive	35.5	Concordant	1	0
ENSMUSG00000017707	Serinc3	0.00753209	0.0056319	-0.0840007	0.019318	0.1964	0.277	1	0
ENSMUSG00000022257	Laptm4b	0.00759866	0.00955789	-0.0818166	0.011111	0.1196	0.1874	1	0
ENSMUSG00000032557	Uba5	0.00768468	0.00616025	-0.0863991	0.0186415	0.148	0.2224	1	0
ENSMUSG00000015189	Casd1	0.00769853	0.0058936	0.101135	0.0147978	0.216	0.147	1	0
ENSMUSG00000024511	Rab27b	0.00779176	0.00887886	-0.166381	0.0178807	0.297	0.3754	1	0
ENSMUSG00000048617	Rtbdn	0.00779692	0.00890596	0.0738723	0.0121934	0.1082	0.0568	1	0
ENSMUSG00000015709	Arnt2	0.00784322	0.00752155	-0.146961	0.022344	0.4184	0.5022	1	0	SFARI					2	0
ENSMUSG00000101609	Kcnq1ot1	0.00784826	0.00751966	-0.16713	0.0218376	0.5612	0.6286	1	0
ENSMUSG00000007892	Rplp1	0.00796486	0.00895839	0.149916	0.0224332	0.3262	0.2488	1	0
ENSMUSG00000089809	Rasgef1b	0.0079751	0.00841833	0.17279	0.0238082	0.3802	0.2972	1	0
ENSMUSG00000066357	Wdr6	0.00817226	0.00760068	0.0868466	0.0147405	0.1442	0.0858	1	0
ENSMUSG00000038172	Ttc39b	0.00828149	0.0114878	-0.132143	0.0306079	0.287	0.3746	1	0
ENSMUSG00000102331	Gm19938	0.00843882	0.00972447	-0.0862473	0.0179099	0.144	0.2144	1	0
ENSMUSG00000053930	Shisa6	0.00848217	0.0155123	-0.305412	0.0518343	0.302	0.3866	1	0
ENSMUSG00000046364	Rpl27a	0.00848225	0.00709485	0.0897725	0.0103839	0.1502	0.0938	1	0
ENSMUSG00000026384	Ptpn4	0.0084985	0.0114139	-0.132281	0.0353347	0.5534	0.6464	1	0	SFARI						1
ENSMUSG00000031708	Tecr	0.00855446	0.00990869	0.175457	0.0244747	0.6348	0.5748	1	0
ENSMUSG00000032336	Nptn	0.00867835	0.0132417	0.160509	0.0322546	0.8336	0.8028	1	0
ENSMUSG00000038630	Zkscan16	0.00872952	0.00820719	0.107431	0.021735	0.1752	0.1136	1	0
ENSMUSG00000086282	Sox5os4	0.0087897	0.0152136	-0.100351	0.0233472	0.0764	0.138	1	0
ENSMUSG00000020389	Cdkl3	0.0088759	0.0104294	-0.0823621	0.0260722	0.1352	0.2092	1	0
ENSMUSG00000013033	Adgrl1	0.00892561	0.00553458	0.138752	0.0185855	0.4354	0.3624	1	0	SFARI						1
ENSMUSG00000030199	Etv6	0.0089842	0.00894802	-0.135737	0.042611	0.1644	0.2434	0.812449	0.419376
ENSMUSG00000033720	Sfxn5	0.00904617	0.0104321	-0.116716	0.0335912	0.1738	0.2496	1	0
ENSMUSG00000112555	Gm47027	0.00906959	0.00481229	-0.130837	0.0196715	0.2702	0.349	1	0
ENSMUSG00000030209	Grin2b	0.00908677	0.0157993	-0.193991	0.0221579	0.9608	0.9658	1	0	SFARI;EAGLE;TADA	2.49e-09	Definitive	29.65	Concordant	1	0
ENSMUSG00000020023	Tmcc3	0.00910945	0.0111293	0.311013	0.0360925	0.3394	0.2598	1	0
ENSMUSG00000033342	Plppr5	0.00914188	0.0153424	-0.131774	0.0404078	0.4326	0.539	1	0
ENSMUSG00000029309	Sparcl1	0.00924919	0.0138671	-0.100339	0.0288091	0.2796	0.3738	1	0	SFARI					2	0
ENSMUSG00000039809	Gabbr2	0.0092693	0.00649637	-0.194354	0.0141409	0.5188	0.594	1	0	SFARI					2	1
ENSMUSG00000015222	Map2	0.0092742	0.00775203	0.185821	0.0156777	0.9004	0.9006	1	0
ENSMUSG00000031865	Dctn1	0.00930707	0.00805638	0.176412	0.0231852	0.5058	0.4326	1	0
ENSMUSG00000048720	Tbc1d12	0.00931514	0.0151936	-0.113707	0.0213708	0.2752	0.3652	1	0
ENSMUSG00000027615	Hps3	0.00939307	0.0114123	-0.0835848	0.0148498	0.0776	0.1338	1	0
ENSMUSG00000033295	Ptprf	0.00939626	0.0093772	0.122487	0.0169984	0.2304	0.1628	1	0
ENSMUSG00000029419	Ajm1	0.00942002	0.00868058	0.0833306	0.015986	0.109	0.0582	1	0
ENSMUSG00000028163	Nfkb1	0.00944828	0.0153706	-0.118241	0.0189348	0.228	0.3114	1	0
ENSMUSG00000033061	Resp18	0.00962634	0.0105039	0.215882	0.0267439	0.467	0.4034	1	0
ENSMUSG00000028789	Azin2	0.00977545	0.0162179	-0.0850557	0.0212375	0.106	0.172	1	0
ENSMUSG00000038623	Tm6sf1	0.00978644	0.0104977	-0.094712	0.0224153	0.2138	0.2958	1	0
ENSMUSG00000005687	Bcas2	0.00979249	0.0122143	-0.0957061	0.0178803	0.195	0.2758	1	0
ENSMUSG00000037196	Pacrg	0.00997922	0.00870809	-0.1198	0.0219425	0.309	0.3952	1	0
ENSMUSG00000022707	Gbe1	0.00997985	0.0066054	-0.0782834	0.0183951	0.0932	0.149	1	0	SFARI					2	0
ENSMUSG00000000804	Usp32	0.0100534	0.0110979	-0.144094	0.0158039	0.546	0.612	1	0
ENSMUSG00000089917	Uckl1	0.0100536	0.0102589	0.10965	0.021442	0.3338	0.254	1	0
ENSMUSG00000039578	Ccser1	0.0101491	0.0140536	-0.145288	0.0276455	0.9948	0.9948	1	0	SFARI					2	0
ENSMUSG00000029563	Foxp2	0.0101917	0.0134291	0.28933	0.0655612	0.1524	0.0934	1	0	SFARI					1	0
ENSMUSG00000027130	Slc12a6	0.0102315	0.00983058	-0.110306	0.0136965	0.1642	0.2336	1	0
ENSMUSG00000025745	Hadha	0.0102989	0.0153245	-0.0829968	0.0124919	0.1462	0.2196	1	0
ENSMUSG00000063145	Bbs5	0.010325	0.0137914	-0.0849075	0.0166455	0.1622	0.238	1	0
ENSMUSG00000029823	Luc7l2	0.0103286	0.00720792	-0.10956	0.0123107	0.9192	0.946	1	0
ENSMUSG00000041921	Metap1d	0.0103432	0.00877503	-0.0851184	0.0244751	0.2252	0.3084	1	0
ENSMUSG00000001270	Ckb	0.0103449	0.0143373	0.168827	0.0355286	0.5238	0.4418	1	0
ENSMUSG00000074505	Fat3	0.0105175	0.00916637	0.114766	0.0236252	0.6786	0.5832	1	0
ENSMUSG00000033054	Npat	0.0105471	0.00873342	-0.105651	0.0159502	0.2648	0.3446	1	0
ENSMUSG00000024955	Esrra	0.0105942	0.00751008	0.10313	0.0161609	0.1618	0.1038	1	0
ENSMUSG00000050511	Oprd1	0.0106115	0.0135765	-0.0809785	0.0224862	0.0694	0.1248	1	0
ENSMUSG00000033510	Otud7a	0.0106341	0.0134984	-0.138063	0.0244587	0.7574	0.8238	1	0	SFARI					2	0
ENSMUSG00000092094	Zfp804b	0.0107256	0.007923	-0.171696	0.0917876	0.348	0.4382	1	0
ENSMUSG00000025468	Caly	0.0107922	0.0102045	0.128655	0.0311192	0.3978	0.3146	1	0
ENSMUSG00000022105	Rb1	0.0109457	0.0163339	-0.122867	0.0361002	0.339	0.4336	1	0
ENSMUSG00000027194	Ttc17	0.010967	0.0067803	-0.129383	0.0129792	0.3582	0.4306	1	0
ENSMUSG00000029769	Ccdc136	0.0111421	0.0153338	-0.124526	0.0272354	0.2372	0.3196	1	0
ENSMUSG00000031066	Usp11	0.0112285	0.0227477	0.133768	0.0261894	0.2694	0.189	1	0
ENSMUSG00000037742	Eef1a1	0.0112976	0.0104557	0.151434	0.0236692	0.4048	0.331	1	0
ENSMUSG00000031709	Tbc1d9	0.0113261	0.00845582	-0.127346	0.0135634	0.2598	0.3338	1	0
ENSMUSG00000038244	Mical2	0.0115044	0.00976561	-0.112899	0.0306815	0.3492	0.447	1	0
ENSMUSG00000019795	Pcmt1	0.0115414	0.0222674	0.16181	0.0278622	0.4706	0.3962	1	0
ENSMUSG00000039087	Rreb1	0.0115681	0.0133933	0.144238	0.00830527	0.127	0.0756	1	0
ENSMUSG00000051335	Gfod1	0.0116627	0.017604	-0.134078	0.0244163	0.1944	0.2686	1	0
ENSMUSG00000063972	Nr6a1	0.0116726	0.0073822	-0.117739	0.0197301	0.5344	0.6154	1	0
ENSMUSG00000053025	Sv2b	0.0117108	0.0108662	0.106819	0.0349824	0.1186	0.0668	1	0
ENSMUSG00000022789	Dnm1l	0.0117459	0.0139297	-0.108776	0.0343809	0.524	0.6212	1	0
ENSMUSG00000028245	Nsmaf	0.0118382	0.00933499	0.0912417	0.0134415	0.5474	0.4576	1	0
ENSMUSG00000000088	Cox5a	0.0119459	0.0180645	0.139723	0.0294354	0.3516	0.2712	1	0
ENSMUSG00000051910	Sox6	0.0119626	0.0242415	-0.227128	0.0784664	0.5184	0.633	0.914686	0.190767	SFARI						1
ENSMUSG00000026610	Esrrg	0.0121586	0.0148921	-0.23987	0.038939	0.5328	0.6042	1	0
ENSMUSG00000036299	BC031181	0.0122278	0.0154304	-0.0813798	0.0209034	0.1294	0.1962	1	0
ENSMUSG00000063785	Utp14a	0.0122714	0.017127	-0.0693354	0.0119862	0.0662	0.1168	1	0
ENSMUSG00000030168	Adipor2	0.0123043	0.0112717	-0.0957523	0.0137055	0.1162	0.1758	1	0
ENSMUSG00000024242	Map4k3	0.0123306	0.00647387	-0.126328	0.0166884	0.4594	0.5396	1	0
ENSMUSG00000057230	Aak1	0.0123858	0.0086829	-0.13575	0.0162865	0.7866	0.8296	1	0
ENSMUSG00000055024	Ep300	0.012508	0.0183791	0.171359	0.0300978	0.5102	0.4498	1	0	SFARI					1	1
ENSMUSG00000052572	Dlg2	0.0125499	0.01041	0.115657	0.0152728	1	1	1	0	SFARI					2	0
ENSMUSG00000024431	Nr3c1	0.0125862	0.0109768	0.119136	0.0244754	0.3272	0.2496	1	0
ENSMUSG00000041540	Sox5	0.0126212	0.00528301	-0.209947	0.0178735	0.3748	0.457	1	0	SFARI;EAGLE;TADA	0.061273	Definitive	17.6	Concordant	1	1
ENSMUSG00000034544	Rsrc1	0.0126704	0.0139808	-0.11298	0.0140268	0.3846	0.4672	1	0	SFARI						1
ENSMUSG00000049176	Frmpd4	0.0126965	0.0111315	-0.193504	0.030604	0.8706	0.9168	1	0	SFARI						1
ENSMUSG00000024462	Gabbr1	0.0127178	0.0164552	0.138518	0.0344041	0.477	0.3978	1	0
ENSMUSG00000028524	Sgip1	0.0128048	0.0135464	-0.13972	0.025805	0.9156	0.9234	1	0
ENSMUSG00000039037	St6galnac5	0.0128455	0.0187349	-0.319682	0.0636071	0.3084	0.3842	0.882881	0.261887
ENSMUSG00000023004	Tuba1b	0.0128833	0.00791527	0.124757	0.00579284	0.2486	0.187	1	0
ENSMUSG00000036019	Tmtc2	0.013126	0.015057	-0.22624	0.0561125	0.3548	0.4374	1	0
ENSMUSG00000019818	Cd164	0.0131269	0.0243678	-0.0837784	0.0161735	0.0738	0.1306	1	0
ENSMUSG00000059361	Nrsn2	0.0131864	0.0171142	0.0956319	0.0164664	0.1832	0.1202	1	0
ENSMUSG00000036435	Exoc1	0.013365	0.0135995	-0.0861391	0.0188685	0.212	0.291	1	0
ENSMUSG00000033499	Larp4b	0.0134187	0.0140176	-0.116085	0.0227977	0.4038	0.4914	1	0
ENSMUSG00000023022	Lima1	0.0134351	0.00975333	-0.0802609	0.0152954	0.0996	0.1554	1	0
ENSMUSG00000026575	Nme7	0.0134411	0.00944821	0.146109	0.0256278	0.549	0.474	1	0
ENSMUSG00000112784	Gm34868	0.0136312	0.0098764	-0.0669909	0.0079653	0.0618	0.1072	1	0
ENSMUSG00000032724	Abtb2	0.0137483	0.0264114	-0.102744	0.0299676	0.0962	0.1634	1	0
ENSMUSG00000028410	Dnaja1	0.0138608	0.0130981	0.128208	0.0193865	0.323	0.2534	1	0
ENSMUSG00000028894	Inpp5b	0.0138654	0.0119587	-0.091722	0.0198808	0.2174	0.2968	1	0
ENSMUSG00000034551	Hdx	0.0139158	0.0202108	-0.0969253	0.0284981	0.2512	0.3388	1	0
ENSMUSG00000021974	Fgf9	0.0139593	0.0118898	-0.082274	0.00856063	0.1398	0.2022	1	0
ENSMUSG00000028180	Zranb2	0.014035	0.0199606	-0.120518	0.0278224	0.5942	0.6632	1	0
ENSMUSG00000025776	Crispld1	0.0140411	0.0158985	-0.11356	0.019594	0.0814	0.1328	1	0
ENSMUSG00000014164	Klhl3	0.0140497	0.012518	0.105091	0.0106686	0.2822	0.213	1	0
ENSMUSG00000019873	Reep3	0.0141183	0.0139574	-0.0853512	0.0111832	0.134	0.1958	1	0	SFARI					2	0
ENSMUSG00000036585	Fgf1	0.0141245	0.0170005	-0.11557	0.0319533	0.2396	0.3254	1	0
ENSMUSG00000029655	N4bp2l2	0.0141622	0.0146232	-0.150797	0.024548	0.519	0.5794	1	0
ENSMUSG00000026944	Abca2	0.0141716	0.0166216	0.110318	0.0311524	0.2978	0.2188	1	0
ENSMUSG00000035863	Palm	0.0141742	0.0223505	0.101163	0.0195327	0.2108	0.1444	1	0
ENSMUSG00000034040	Galnt17	0.0142111	0.0133438	0.175815	0.0241084	0.5474	0.4624	1	0
ENSMUSG00000024064	Galnt14	0.0144352	0.0228538	-0.147838	0.0346539	0.363	0.4492	1	0	SFARI					2	0
ENSMUSG00000043716	Rpl7	0.014451	0.0249706	0.0930632	0.013637	0.1206	0.0692	1	0
ENSMUSG00000033166	Dis3	0.0144977	0.0113774	-0.0621639	0.00823768	0.074	0.1232	1	0
ENSMUSG00000036737	Oxsr1	0.0145046	0.0239065	-0.0727801	0.0153446	0.0686	0.12	1	0
ENSMUSG00000024789	Jak2	0.0145102	0.0138045	0.110788	0.0245321	0.251	0.1848	1	0
ENSMUSG00000030068	Gm20696	0.0146343	0.0170497	-0.145536	0.0322595	0.3022	0.3756	1	0
ENSMUSG00000071753	Cdr1os	0.0146737	0.0192841	0.168008	0.0330582	0.6784	0.631	1	0
ENSMUSG00000034488	Edil3	0.0147017	0.017036	-0.185948	0.0359829	0.6778	0.7228	1	0
ENSMUSG00000091636	Akain1	0.0147601	0.0093733	-0.0709906	0.00625348	0.0862	0.1378	1	0
ENSMUSG00000040675	Mthfd1l	0.014798	0.0160114	-0.0909056	0.0210546	0.1264	0.1884	1	0
ENSMUSG00000031441	Atp11a	0.0149059	0.013938	0.102228	0.0210616	0.259	0.1904	1	0
ENSMUSG00000038302	Afg1l	0.0149082	0.00983376	-0.0872502	0.010878	0.2062	0.2766	1	0
ENSMUSG00000032594	Ip6k1	0.0150761	0.00732196	0.0997321	0.00771136	0.2698	0.204	1	0
ENSMUSG00000017421	Zfp207	0.0151751	0.0155069	0.158047	0.018501	0.5924	0.5378	1	0
ENSMUSG00000055782	Abcd2	0.0151946	0.0193328	-0.089464	0.0163022	0.0748	0.126	1	0
ENSMUSG00000003810	Mast2	0.0152616	0.0169356	-0.135349	0.0214254	0.6058	0.7032	1	0
ENSMUSG00000015120	Ube2i	0.0152872	0.015791	-0.076142	0.012729	0.0896	0.1428	1	0
ENSMUSG00000019820	Utrn	0.0152887	0.0156132	-0.218334	0.0292338	0.4894	0.5566	1	0
ENSMUSG00000092083	Kcnb2	0.0153025	0.0201514	-0.243278	0.0464939	0.6652	0.7166	1	0
ENSMUSG00000024286	Ccny	0.0153507	0.0127992	-0.127345	0.0249772	0.4686	0.5444	1	0
ENSMUSG00000020122	Egfr	0.0154562	0.0197472	-0.197768	0.0613219	0.2086	0.2862	1	0
ENSMUSG00000006024	Napa	0.015459	0.030192	-0.0861095	0.0176442	0.1008	0.1646	1	0
ENSMUSG00000031137	Fgf13	0.0155089	0.0217929	-0.487708	0.0767859	0.5562	0.6064	1	0	SFARI					3	1
ENSMUSG00000024261	Syt4	0.0155377	0.0160129	0.125775	0.0195723	0.3556	0.2832	1	0
ENSMUSG00000046314	Stxbp6	0.0156079	0.0215781	-0.206743	0.0585112	0.2782	0.3656	1	0
ENSMUSG00000009394	Syn2	0.0157605	0.00828525	-0.153076	0.00715816	0.7642	0.8244	1	0	SFARI					2	0
ENSMUSG00000035864	Syt1	0.0158242	0.0284224	-0.143139	0.0293819	0.9432	0.9296	1	0	SFARI;TADA	0.016653					1
ENSMUSG00000027799	Nbea	0.0158433	0.021892	-0.157739	0.0302712	0.9882	0.977	1	0	SFARI					1	1
ENSMUSG00000024302	Dtna	0.015879	0.00961408	-0.141304	0.0150296	0.593	0.6542	1	0
ENSMUSG00000037503	Fam168b	0.015928	0.0285962	-0.096619	0.016405	0.1736	0.2494	1	0
ENSMUSG00000020014	Cfap54	0.0159641	0.0281853	0.112052	0.0279306	0.1208	0.0672	1	0
ENSMUSG00000041624	Gucy1a2	0.0160354	0.0242801	0.147378	0.0391432	0.5706	0.4948	1	0	SFARI					2	0
ENSMUSG00000038206	Fbxo8	0.0160721	0.0239892	-0.119112	0.0283755	0.2856	0.3658	1	0
ENSMUSG00000001870	Ltbp1	0.0160994	0.0232292	-0.102597	0.0175482	0.0636	0.1116	1	0
ENSMUSG00000005873	Reep5	0.0161644	0.0116376	0.114192	0.0169773	0.3346	0.2644	1	0
ENSMUSG00000001323	Srr	0.0162111	0.0209294	-0.129085	0.0374368	0.2196	0.2978	1	0
ENSMUSG00000024392	Bag6	0.016253	0.00831291	0.0632013	0.00547395	0.1266	0.0782	1	0
ENSMUSG00000047414	Flrt2	0.016269	0.00984236	-0.133002	0.056312	0.4972	0.5822	1	0
ENSMUSG00000051331	Cacna1c	0.0163365	0.0217843	0.212487	0.0456419	0.8636	0.8752	0.869613	0.291554	SFARI					1	1
ENSMUSG00000015143	Actn1	0.0164112	0.0210076	0.146897	0.0290712	0.254	0.186	1	0
ENSMUSG00000027523	Gnas	0.0164938	0.0195809	0.166945	0.0208631	0.704	0.6552	1	0	SFARI					2	0
ENSMUSG00000042744	Hectd4	0.0165224	0.0109262	0.104294	0.00515518	0.7236	0.667	1	0	SFARI					1	0
ENSMUSG00000027649	Ctnnbl1	0.0167628	0.023671	-0.0806517	0.0174947	0.198	0.272	1	0
ENSMUSG00000050663	Trhde	0.0168716	0.0201201	-0.375847	0.0871873	0.3338	0.4122	1	0
ENSMUSG00000046532	Ar	0.0169033	0.0303881	0.185518	0.019491	0.1878	0.1286	1	0	SFARI					2	0
ENSMUSG00000047428	Dlk2	0.0170138	0.0182011	0.0850706	0.017254	0.116	0.0656	1	0
ENSMUSG00000045083	Lingo2	0.0170469	0.0329599	0.285273	0.0990199	0.8514	0.77	0.935797	0.143563
ENSMUSG00000059921	Unc5c	0.0171203	0.0175494	-0.431698	0.0229197	0.6632	0.717	1	0
ENSMUSG00000034675	Dbn1	0.0171472	0.0343717	0.123415	0.0274033	0.2966	0.2172	1	0
ENSMUSG00000020783	Ncbp3	0.0171511	0.00973724	-0.0626729	0.0190877	0.1114	0.1688	1	0
ENSMUSG00000029283	Cdc7	0.0171515	0.013417	0.0935096	0.0059151	0.1902	0.133	1	0
ENSMUSG00000053347	Zfp943	0.017157	0.0233736	-0.0747367	0.0174034	0.128	0.19	1	0
ENSMUSG00000071379	Hpcal1	0.0171945	0.0182712	0.0849429	0.0141547	0.1238	0.0746	1	0
ENSMUSG00000024425	Ndfip1	0.0173394	0.0102447	0.154492	0.00804087	0.7122	0.6546	1	0
ENSMUSG00000032470	Mras	0.0173777	0.0204004	-0.0872616	0.0134864	0.117	0.177	1	0
ENSMUSG00000031833	Mast3	0.0174239	0.0223287	0.0816958	0.019492	0.1384	0.0862	1	0	SFARI					3	0
ENSMUSG00000040133	Gpr176	0.0174324	0.0184854	-0.195165	0.0330277	0.2556	0.323	1	0
ENSMUSG00000061207	Stk19	0.0174604	0.0166447	0.102953	0.0136124	0.2116	0.152	1	0
ENSMUSG00000033768	Nrxn2	0.0174706	0.0161115	0.128054	0.0196515	0.5376	0.4766	1	0	SFARI;EAGLE		Moderate	7	Discordant	1	0
ENSMUSG00000037736	Limch1	0.017594	0.0223039	-0.165862	0.0353885	0.6956	0.7686	1	0
ENSMUSG00000029206	Nsun7	0.0178463	0.0130295	0.105728	0.00860714	0.1894	0.1316	1	0
ENSMUSG00000022641	Bbx	0.0179455	0.00706258	0.130878	0.0127011	0.3966	0.3264	1	0
ENSMUSG00000057060	Slc35f3	0.0179811	0.01262	0.171635	0.0284556	0.348	0.2774	1	0
ENSMUSG00000024276	Zfp397	0.017986	0.0164367	-0.07672	0.0150277	0.1078	0.1632	1	0
ENSMUSG00000013878	Rnf170	0.0181068	0.0158566	0.0795797	0.0148884	0.1598	0.1056	1	0
ENSMUSG00000079523	Tmsb10	0.0181077	0.0154737	0.109067	0.0120948	0.1796	0.1248	1	0
ENSMUSG00000069727	Zfp975	0.0183369	0.0188803	-0.0661653	0.0110955	0.0662	0.1124	1	0
ENSMUSG00000096054	Syne1	0.0184257	0.0138658	-0.127839	0.0329931	0.8632	0.9056	1	0	SFARI					2	1
ENSMUSG00000058297	Spock2	0.0184845	0.0251213	0.144896	0.0192792	0.484	0.4172	1	0
ENSMUSG00000023011	Faim2	0.018487	0.0154696	0.11491	0.0276263	0.3154	0.2452	1	0
ENSMUSG00000091457	Gm17171	0.0185726	0.0267904	-0.0825887	0.0176057	0.1004	0.161	1	0
ENSMUSG00000049421	Zfp260	0.0185861	0.0220167	-0.0810993	0.0240703	0.1092	0.1698	1	0
ENSMUSG00000089715	Cbx6	0.0185918	0.0332265	0.133868	0.0288801	0.2416	0.1704	1	0
ENSMUSG00000040860	Crocc	0.018707	0.0229101	0.0834891	0.0111798	0.18	0.1214	1	0
ENSMUSG00000024085	Man2a1	0.0187881	0.0163703	-0.143535	0.0139324	0.3038	0.3724	1	0
ENSMUSG00000029461	Fam168a	0.0188123	0.0141688	0.131734	0.0172744	0.7038	0.6516	1	0
ENSMUSG00000034156	Tspoap1	0.0188764	0.00938319	0.104164	0.00966258	0.485	0.4108	1	0	SFARI					2	0
ENSMUSG00000038119	Cdon	0.0190146	0.0133887	0.0919587	0.0158866	0.1364	0.0884	1	0	SFARI					3	0
ENSMUSG00000020166	Cnot2	0.0190513	0.0273396	0.177686	0.0318438	0.668	0.6322	1	0
ENSMUSG00000033335	Dnm2	0.0192611	0.0143038	-0.116121	0.0268741	0.3088	0.3802	1	0
ENSMUSG00000028920	Fbxo42	0.0192666	0.00994265	-0.0918264	0.0120296	0.2676	0.344	1	0
ENSMUSG00000041112	Elmo1	0.019291	0.00922206	0.109795	0.0143347	0.6254	0.5388	1	0
ENSMUSG00000028525	Pde4b	0.019319	0.0191581	0.221727	0.0388764	0.6256	0.554	1	0
ENSMUSG00000018001	Cyth3	0.0193896	0.0174188	-0.0847691	0.0228003	0.3124	0.3934	1	0
ENSMUSG00000044912	Syt16	0.0194097	0.017517	0.202312	0.025814	0.481	0.422	1	0
ENSMUSG00000050891	Tatdn1	0.0194645	0.0224559	-0.0873249	0.0171285	0.1696	0.2378	1	0
ENSMUSG00000066892	Fbxl12	0.0197811	0.0321434	-0.0882091	0.0218407	0.1348	0.1992	1	0
ENSMUSG00000026672	Optn	0.0198039	0.0189181	-0.0936986	0.0168919	0.1312	0.19	1	0
ENSMUSG00000002006	Pdzd4	0.0198147	0.0210418	0.157733	0.0253224	0.423	0.3604	1	0
ENSMUSG00000030166	Rad52	0.019847	0.00640645	-0.0638226	0.00425801	0.0694	0.113	1	0
ENSMUSG00000027221	Chst1	0.0199467	0.0167915	0.0726706	0.0100226	0.1344	0.086	1	0
ENSMUSG00000050148	Ubqln2	0.0200614	0.0164673	0.0671735	0.00750754	0.104	0.0618	1	0
ENSMUSG00000004931	Apba3	0.0201023	0.0250715	0.0904191	0.0163239	0.1698	0.113	1	0
ENSMUSG00000021939	Ctsb	0.0201404	0.0110013	0.139579	0.0139353	0.3714	0.313	1	0
ENSMUSG00000009418	Nav1	0.0203735	0.0261777	-0.120534	0.0185105	0.5684	0.6426	1	0
ENSMUSG00000018425	Dhx40	0.0204086	0.0152254	0.0996993	0.0101606	0.2038	0.1456	1	0
ENSMUSG00000024535	Snx24	0.0204842	0.0140009	-0.0930785	0.00783096	0.2274	0.2922	1	0
ENSMUSG00000022076	Klhl1	0.0205572	0.0171891	0.23098	0.0224955	0.2266	0.1702	1	0
ENSMUSG00000030134	Rasgef1a	0.0206152	0.0310016	0.159716	0.0191691	0.4774	0.4202	1	0
ENSMUSG00000031565	Fgfr1	0.0206285	0.0148143	0.133239	0.00444428	0.214	0.1556	1	0	SFARI					2	0
ENSMUSG00000093387	Gm20732	0.0206643	0.0190281	-0.0976426	0.0245507	0.1902	0.2574	1	0
ENSMUSG00000031885	Cbfb	0.0207582	0.0109748	-0.0768839	0.00884756	0.0848	0.1316	1	0
ENSMUSG00000051359	Ncald	0.0209846	0.0158092	-0.121975	0.014985	0.3356	0.4074	1	0
ENSMUSG00000085234	Gm15614	0.0210166	0.0407953	-0.0916477	0.0243154	0.1356	0.203	1	0
ENSMUSG00000010608	Rbm25	0.0210427	0.0185004	-0.114799	0.0223561	0.7046	0.7448	1	0
ENSMUSG00000110723	Gm49353	0.0210438	0.019005	0.107592	0.0234389	0.2804	0.2086	1	0
ENSMUSG00000041313	Slc7a1	0.0210659	0.0270893	-0.0956586	0.0146432	0.1046	0.1568	1	0
ENSMUSG00000061601	Pclo	0.0212225	0.0197047	-0.146502	0.0344712	0.9254	0.9446	1	0
ENSMUSG00000033174	Mgll	0.0212422	0.0259835	-0.0943893	0.0176073	0.1846	0.2566	1	0
ENSMUSG00000034312	Iqsec1	0.021371	0.018977	-0.135397	0.0399904	0.5676	0.6432	1	0
ENSMUSG00000020723	Cacng4	0.0213724	0.0126874	0.0686063	0.00945578	0.1488	0.0988	1	0
ENSMUSG00000055932	Fto	0.0214644	0.018999	-0.113476	0.0234822	0.508	0.579	1	0
ENSMUSG00000047773	Ankfn1	0.0214847	0.0158259	0.147525	0.0190894	0.2002	0.1438	1	0
ENSMUSG00000111627	Gm48749	0.0215367	0.0143721	0.124472	0.00953027	0.2288	0.1668	1	0
ENSMUSG00000085655	Gm15952	0.0216823	0.0230552	-0.0852933	0.0257455	0.1244	0.1868	1	0
ENSMUSG00000021124	Vti1b	0.0216874	0.0149649	-0.088042	0.0156203	0.1586	0.2182	1	0
ENSMUSG00000030310	Slc6a1	0.0218187	0.0300653	-0.155984	0.0175639	0.548	0.6158	1	0	SFARI;EAGLE;TADA	5.91e-10	Definitive	31.15	Concordant	1	1
ENSMUSG00000072501	Phf20l1	0.0218382	0.0190477	-0.206138	0.0143678	0.7468	0.7976	1	0
ENSMUSG00000020451	Limk2	0.0218434	0.0273328	0.103801	0.0123358	0.305	0.2352	1	0
ENSMUSG00000039539	Sgcz	0.021899	0.0318719	0.175691	0.051027	0.8782	0.8366	1	0
ENSMUSG00000079435	Rpl36a	0.0219122	0.0222707	0.072135	0.0154046	0.105	0.0606	1	0
ENSMUSG00000049488	Tmem67	0.0221654	0.0144932	0.110634	0.00828098	0.2334	0.176	1	0
ENSMUSG00000034796	Cpne7	0.0222096	0.0203267	0.259549	0.0319622	0.2312	0.1768	1	0
ENSMUSG00000063275	Hacd1	0.0222231	0.0141289	-0.123143	0.0132893	0.23	0.2914	1	0
ENSMUSG00000060012	Kif13b	0.0222431	0.0159997	-0.0895587	0.0139518	0.2244	0.2898	1	0	SFARI					2	0
ENSMUSG00000031129	Slc9a9	0.0225425	0.012315	-0.118896	0.0212033	0.3414	0.4098	1	0	SFARI					2	0
ENSMUSG00000040929	Rfx3	0.0225794	0.0129604	0.237654	0.0212481	0.5682	0.536	1	0	SFARI;EAGLE;TADA	0.00128045	Definitive	15.95	Concordant	1	0
ENSMUSG00000052372	Il1rapl1	0.0225987	0.0157868	0.153834	0.011249	0.958	0.949	1	0	SFARI					2	0
ENSMUSG00000027581	Stmn3	0.0226007	0.0246692	0.148897	0.0242843	0.5202	0.4628	1	0
ENSMUSG00000046027	Stard5	0.0227034	0.0143672	-0.0680329	0.00977181	0.0916	0.1418	1	0
ENSMUSG00000103428	Gm20754	0.0227852	0.0149087	-0.329422	0.0433798	0.2988	0.3636	1	0
ENSMUSG00000031337	Mtm1	0.0228101	0.0197685	-0.0780413	0.0159261	0.2108	0.2854	1	0
ENSMUSG00000036622	Atp13a2	0.0228202	0.0352417	0.122197	0.0221898	0.2774	0.2124	1	0
ENSMUSG00000063531	Sema3e	0.0229382	0.0441893	-0.143589	0.0510204	0.1504	0.2214	1	0
ENSMUSG00000046159	Chrm3	0.0229722	0.0137572	-0.149237	0.032344	0.452	0.5314	1	0	SFARI					2	0
ENSMUSG00000063600	Egfem1	0.0229934	0.0294634	-0.359602	0.0824651	0.4808	0.5402	1	0
ENSMUSG00000005871	Apc	0.0229952	0.0154374	-0.127882	0.0196356	0.831	0.8528	1	0
ENSMUSG00000061603	Akap6	0.0230613	0.032838	-0.117706	0.036233	0.8958	0.9234	1	0
ENSMUSG00000042581	Thsd7b	0.0230986	0.0236046	0.193104	0.0168668	0.4252	0.3644	1	0
ENSMUSG00000000127	Fer	0.023129	0.0165005	-0.111867	0.0114439	0.513	0.5894	1	0
ENSMUSG00000019146	Cacng2	0.0232068	0.0119896	-0.113307	0.0212315	0.32	0.39	1	0
ENSMUSG00000025221	Kcnip2	0.023214	0.0233361	0.0993233	0.0116973	0.1676	0.1142	1	0
ENSMUSG00000022812	Gsk3b	0.0232507	0.0184523	-0.088083	0.0251579	0.6756	0.7552	1	0
ENSMUSG00000024325	Ring1	0.0232652	0.0127507	0.104345	0.00949015	0.3466	0.2788	1	0
ENSMUSG00000050064	Zfp697	0.0234095	0.0138339	-0.0715927	0.00903349	0.1262	0.1828	1	0
ENSMUSG00000035919	Bbs9	0.0234241	0.0265428	0.166218	0.0163253	0.331	0.2714	1	0
ENSMUSG00000001542	Ell2	0.023479	0.0316883	-0.115239	0.0170528	0.1528	0.2156	1	0
ENSMUSG00000041216	Clvs1	0.023506	0.0384941	-0.132761	0.0255189	0.5594	0.6368	1	0
ENSMUSG00000036501	Fam13b	0.0235427	0.0289547	-0.118292	0.0274325	0.495	0.567	1	0
ENSMUSG00000057715	A830018L16Rik	0.0237554	0.0236462	-0.309225	0.0554707	0.4084	0.467	1	0
ENSMUSG00000040112	Mrps35	0.0237839	0.034704	-0.0727712	0.0156507	0.0772	0.1268	1	0
ENSMUSG00000033854	Kcnk10	0.0239819	0.0255865	0.117574	0.0183467	0.1898	0.135	1	0
ENSMUSG00000016319	Slc25a5	0.0240291	0.0485658	0.119784	0.02974	0.2352	0.1644	1	0
ENSMUSG00000097585	E230029C05Rik	0.0240644	0.0139773	-0.0665809	0.0123842	0.1114	0.1626	1	0
ENSMUSG00000036273	Lrrk2	0.02439	0.025138	-0.0940178	0.0092757	0.1436	0.2028	1	0
ENSMUSG00000084764	Grip1os2	0.0244482	0.024515	-0.10747	0.0427689	0.3184	0.4168	1	0
ENSMUSG00000019970	Sgk1	0.0244735	0.0342572	-0.0806182	0.0347953	0.2756	0.3506	1	0
ENSMUSG00000051344	Plekhm3	0.0246552	0.0328276	-0.100801	0.0245449	0.2336	0.3032	1	0
ENSMUSG00000062006	Rpl34	0.0247165	0.0379772	0.0912844	0.0124521	0.1364	0.0874	1	0	EAGLE		No scorable evidence	0	Concordant
ENSMUSG00000035476	Tab3	0.0247178	0.0191076	-0.0989379	0.0204703	0.1646	0.2252	1	0
ENSMUSG00000041153	Osgin2	0.0247471	0.0253475	-0.0536584	0.0125844	0.065	0.1088	1	0
ENSMUSG00000085201	Nr6a1os	0.0247594	0.0140773	-0.0822911	0.00963713	0.163	0.2214	1	0
ENSMUSG00000034729	Mrps10	0.0249149	0.0310615	-0.064327	0.0116559	0.063	0.1062	1	0
ENSMUSG00000007653	Gabrb2	0.0249218	0.037975	-0.23885	0.0506029	0.5966	0.6434	1	0	SFARI;EAGLE		Limited	0.3	Discordant	1	0
ENSMUSG00000021036	Sptlc2	0.0250064	0.0192821	-0.096562	0.0255798	0.2178	0.2846	1	0
ENSMUSG00000029108	Pcdh7	0.0250086	0.0262594	0.27575	0.0544374	0.7444	0.6912	1	0
ENSMUSG00000040649	Rimklb	0.0251213	0.022541	0.0977636	0.0203856	0.2192	0.1598	1	0
ENSMUSG00000030075	Cntn3	0.0251574	0.0447769	0.185916	0.032046	0.6326	0.574	1	0	SFARI					2	0
ENSMUSG00000047434	Xxylt1	0.0252462	0.0150118	-0.0493519	0.0101908	0.0804	0.1274	1	0
ENSMUSG00000042302	Ehbp1	0.0252732	0.00517878	-0.0778112	0.00392604	0.7202	0.7756	1	0
ENSMUSG00000034295	Fhod3	0.0252751	0.017984	-0.100694	0.0196696	0.3184	0.3982	1	0
ENSMUSG00000019838	Slc16a10	0.0252907	0.0156049	-0.0763423	0.0126133	0.0694	0.1118	1	0
ENSMUSG00000020137	Thap2	0.0253211	0.00976218	-0.0743719	0.0071054	0.1626	0.2206	1	0
ENSMUSG00000078515	Ddi2	0.0254491	0.0381295	-0.0796051	0.0154988	0.1722	0.2402	1	0
ENSMUSG00000048040	Arxes2	0.0255255	0.0343664	0.0794805	0.0263737	0.1146	0.0636	0.970833	0.0652203
ENSMUSG00000032452	Clstn2	0.025598	0.0427278	-0.271586	0.0270369	0.5172	0.587	1	0
ENSMUSG00000039286	Fndc3b	0.0256203	0.0453059	0.122338	0.0328869	0.3334	0.2632	1	0
ENSMUSG00000064105	Cnnm2	0.0256203	0.0216841	-0.105808	0.0209451	0.305	0.3714	1	0
ENSMUSG00000034994	Eef2	0.025627	0.0429778	0.0932654	0.0199994	0.1876	0.129	1	0
ENSMUSG00000027797	Dclk1	0.0256529	0.0226363	-0.108865	0.0164823	0.9142	0.9294	1	0
ENSMUSG00000086450	Macrod2os1	0.0257059	0.017614	0.10815	0.0265518	0.2502	0.1866	1	0
ENSMUSG00000024878	Cbwd1	0.0258366	0.0185559	-0.0613288	0.0158573	0.1166	0.1728	1	0
ENSMUSG00000027350	Chgb	0.0259584	0.0317462	0.107263	0.0215277	0.2482	0.1858	1	0
ENSMUSG00000097767	Miat	0.0259911	0.0150388	0.120542	0.014163	0.3558	0.2904	1	0
ENSMUSG00000030525	Chrna7	0.0260482	0.0214992	-0.164196	0.0387431	0.1954	0.2554	1	0	SFARI					2	0
ENSMUSG00000004455	Ppp1cc	0.0260578	0.0144886	-0.0815356	0.0147106	0.1364	0.191	1	0
ENSMUSG00000025199	Chuk	0.0264776	0.0351761	-0.126529	0.0269358	0.3054	0.3804	1	0
ENSMUSG00000042700	Sipa1l1	0.0265082	0.0229192	0.145768	0.0147681	0.7074	0.659	1	0
ENSMUSG00000034620	Rxylt1	0.0265281	0.0265172	-0.0776893	0.019296	0.1028	0.1586	1	0
ENSMUSG00000026425	Srgap2	0.0266636	0.025207	-0.128818	0.0122112	0.7474	0.7782	1	0
ENSMUSG00000030216	Wbp11	0.0267666	0.0214142	-0.0493986	0.020891	0.0892	0.141	1	0
ENSMUSG00000022404	Slc25a17	0.0269786	0.0256822	-0.0756865	0.0184132	0.0926	0.143	1	0
ENSMUSG00000021474	Sfxn1	0.0269828	0.025643	-0.0781719	0.0151992	0.1532	0.2124	1	0
ENSMUSG00000043384	Gprasp1	0.0270059	0.0193936	0.123427	0.0179928	0.7444	0.7176	1	0
ENSMUSG00000059975	Zfp74	0.0270201	0.0445294	-0.0817865	0.0166989	0.0674	0.1138	1	0
ENSMUSG00000041278	Ttc1	0.0270576	0.0200804	-0.0680998	0.0252987	0.1048	0.1588	1	0
ENSMUSG00000071369	Map3k5	0.0273394	0.00570111	0.093791	0.00811402	0.1808	0.1312	1	0
ENSMUSG00000041966	Dcaf17	0.0274499	0.0168723	-0.0876818	0.0165535	0.2158	0.2768	1	0
ENSMUSG00000029101	Rgs12	0.027474	0.0260675	-0.18707	0.0148367	0.0782	0.1234	1	0
ENSMUSG00000032985	5730522E02Rik	0.0274814	0.0546586	0.245608	0.0550249	0.534	0.4632	1	0
ENSMUSG00000017466	Timp2	0.0277821	0.0288617	0.13395	0.0189768	0.2572	0.1996	1	0
ENSMUSG00000024220	Zfp523	0.0278144	0.0302216	0.0934714	0.0142933	0.1912	0.1364	1	0
ENSMUSG00000026174	Cnot9	0.0279242	0.00912153	-0.0670836	0.00842334	0.0866	0.1312	1	0
ENSMUSG00000057637	Prdm2	0.0279979	0.00853734	-0.0848673	0.00483392	0.2542	0.3228	1	0
ENSMUSG00000084967	Gm12296	0.0280374	0.0253089	-0.0730007	0.00912656	0.1292	0.185	1	0
ENSMUSG00000029167	Ppargc1a	0.0280824	0.0330261	-0.123002	0.0263628	0.3246	0.4058	1	0
ENSMUSG00000034591	Slc41a2	0.0281042	0.0510421	0.110036	0.0284862	0.253	0.184	1	0
ENSMUSG00000022476	Polr3h	0.0281467	0.0223309	-0.0681785	0.0115781	0.176	0.2372	1	0
ENSMUSG00000026797	Stxbp1	0.0282354	0.0143749	0.116554	0.00577778	0.5324	0.4662	1	0	SFARI;EAGLE;TADA	2.4e-05	Definitive	19.1	Concordant	1	1
ENSMUSG00000047473	Zfp30	0.0283718	0.0277339	-0.0739497	0.0181358	0.0746	0.1194	1	0
ENSMUSG00000033439	Trmt13	0.0283894	0.0218999	-0.0851682	0.0117293	0.1988	0.2636	1	0
ENSMUSG00000025085	Ablim1	0.028394	0.0360622	-0.137504	0.033901	0.507	0.5936	1	0
ENSMUSG00000031353	Rbbp7	0.0284694	0.0317048	0.0914939	0.00939979	0.2392	0.1786	1	0
ENSMUSG00000013701	Timm23	0.0286724	0.0243526	-0.0924308	0.0172812	0.1634	0.2222	1	0
ENSMUSG00000060679	Mrps9	0.0287034	0.0274957	-0.0998381	0.0254818	0.2734	0.3454	1	0
ENSMUSG00000046169	Adamts6	0.0289505	0.0439326	-0.135353	0.0356379	0.327	0.4096	1	0
ENSMUSG00000021460	Auh	0.0291422	0.0415515	-0.0798516	0.0281315	0.195	0.267	1	0
ENSMUSG00000035266	Helq	0.0291446	0.0288141	-0.0667411	0.019593	0.177	0.2432	1	0
ENSMUSG00000020074	Ccar1	0.0292641	0.0249597	0.107678	0.0153935	0.5696	0.506	1	0
ENSMUSG00000058975	Kcnc1	0.0292848	0.0483869	-0.102823	0.0455456	0.4476	0.5372	1	0	SFARI					2	0
ENSMUSG00000056342	Usp34	0.0294357	0.0193369	0.104077	0.0180311	0.9326	0.9256	1	0
ENSMUSG00000016477	E2f3	0.0295848	0.0304955	-0.0748494	0.01772	0.1642	0.2258	1	0
ENSMUSG00000035293	G2e3	0.0298072	0.0266165	-0.0686171	0.0158039	0.129	0.1832	1	0
ENSMUSG00000048911	Rnf24	0.0298556	0.0143106	-0.0850661	0.0127671	0.2022	0.2614	1	0
ENSMUSG00000073725	Lmbrd1	0.0299542	0.0413653	-0.118183	0.0246552	0.3908	0.4678	1	0
ENSMUSG00000038718	Pbx3	0.0300964	0.0147269	0.203902	0.0613955	0.3038	0.238	1	0
ENSMUSG00000045095	Magi1	0.0301361	0.0254256	-0.158832	0.0415798	0.7316	0.7718	1	0
ENSMUSG00000020366	Mapk9	0.0301445	0.0554706	-0.0993151	0.0298014	0.2774	0.3614	1	0
ENSMUSG00000031295	Phka2	0.0302647	0.0195318	-0.109393	0.0228109	0.264	0.324	1	0
ENSMUSG00000039959	Hip1	0.0302909	0.028253	-0.123087	0.0241118	0.2078	0.2708	1	0
ENSMUSG00000037363	Letm2	0.0304039	0.0559494	-0.112701	0.0329431	0.2034	0.2812	1	0
ENSMUSG00000063632	Sox11	0.0304232	0.0317608	0.0829574	0.0202831	0.1458	0.0968	1	0
ENSMUSG00000028426	Rad23b	0.0304367	0.0192476	-0.100236	0.00415886	0.2296	0.2904	1	0
ENSMUSG00000019806	Aig1	0.0304786	0.0120311	-0.11178	0.0202128	0.5536	0.6336	1	0
ENSMUSG00000004415	Col26a1	0.0305455	0.037284	-0.067365	0.0158108	0.1136	0.1708	1	0
ENSMUSG00000033713	Foxn3	0.0306043	0.064732	-0.191715	0.0742959	0.5444	0.6204	0.878816	0.270975
ENSMUSG00000030452	Nipa2	0.0307519	0.0314284	-0.0765059	0.0298211	0.1564	0.2214	1	0	SFARI					2	0
ENSMUSG00000028226	Mmp16	0.0308081	0.0224315	-0.155002	0.0239405	0.7832	0.8244	1	0
ENSMUSG00000058152	Chsy3	0.0310106	0.0248065	0.0709764	0.0414879	0.568	0.4874	1	0
ENSMUSG00000016933	Plcg1	0.0310181	0.0382139	0.102942	0.0346028	0.345	0.2682	1	0
ENSMUSG00000056602	Fry	0.0311218	0.027205	0.144187	0.0204576	0.7482	0.72	1	0
ENSMUSG00000027667	Zfp639	0.0313496	0.0300722	-0.0752704	0.022921	0.1704	0.2354	1	0
ENSMUSG00000029576	Radil	0.0314386	0.0190352	0.0857394	0.00850478	0.1646	0.1168	1	0
ENSMUSG00000004285	Atp6v1f	0.0314625	0.039453	0.0797898	0.0146374	0.1228	0.077	1	0
ENSMUSG00000070565	Rasal2	0.0316306	0.0377514	-0.129669	0.0474295	0.7246	0.7564	1	0
ENSMUSG00000056367	Actr3b	0.0317701	0.0364099	0.144918	0.0237118	0.2952	0.2352	1	0
ENSMUSG00000070498	Tmem132b	0.0319558	0.0330701	-0.205145	0.035093	0.5296	0.5722	1	0
ENSMUSG00000085084	4930570G19Rik	0.0320525	0.0139577	0.0722926	0.010344	0.1228	0.0812	1	0
ENSMUSG00000005069	Pex5	0.0322728	0.0220264	-0.0734324	0.0164277	0.0924	0.1398	1	0
ENSMUSG00000052949	Rnf157	0.0323811	0.0190253	-0.101081	0.015273	0.4176	0.4894	1	0
ENSMUSG00000025261	Huwe1	0.0325992	0.0214977	0.12036	0.017962	0.8438	0.803	1	0	SFARI						1
ENSMUSG00000054693	Adam10	0.0326647	0.0132334	-0.0680731	0.0166516	0.3264	0.3922	1	0
ENSMUSG00000059796	Eif4a1	0.0327374	0.0435506	0.105555	0.0213922	0.2366	0.176	1	0
ENSMUSG00000027748	Trpc4	0.032872	0.043157	-0.204055	0.0493817	0.3348	0.4034	1	0
ENSMUSG00000044288	Cnr1	0.0328835	0.0180864	-0.344541	0.0319292	0.338	0.3886	1	0	SFARI					2	0
ENSMUSG00000028519	Dab1	0.0329473	0.0696675	-0.229273	0.0698981	0.7876	0.8332	1	0
ENSMUSG00000049866	Arl4c	0.0333204	0.0236987	-0.0614188	0.0103231	0.0754	0.1188	1	0
ENSMUSG00000056185	Snx32	0.0333759	0.0328232	0.10727	0.0160941	0.4026	0.3376	1	0
ENSMUSG00000062198	2700097O09Rik	0.0333942	0.0337241	-0.0755459	0.0283364	0.1866	0.2536	1	0
ENSMUSG00000024211	Grm8	0.033455	0.0414932	0.234357	0.0495037	0.331	0.2678	1	0
ENSMUSG00000026004	Kansl1l	0.033521	0.0527506	-0.0886572	0.030129	0.4996	0.5908	1	0
ENSMUSG00000000184	Ccnd2	0.0335665	0.0289168	-0.097767	0.0135714	0.0892	0.1342	1	0
ENSMUSG00000097342	Gm26618	0.0336135	0.0278284	-0.0672146	0.0196803	0.0964	0.1464	1	0
ENSMUSG00000048706	Lurap1l	0.0336533	0.0386078	-0.0874399	0.017673	0.1388	0.196	1	0
ENSMUSG00000008348	Ubc	0.0336855	0.0324494	0.110384	0.0162705	0.2768	0.2206	1	0
ENSMUSG00000087086	Gm13269	0.0337905	0.0512747	0.0776734	0.030658	0.1888	0.1284	1	0
ENSMUSG00000037653	Kctd8	0.0338175	0.0365182	-0.167813	0.0669604	0.527	0.6048	1	0
ENSMUSG00000062929	Cfl2	0.0338301	0.0341848	-0.0778172	0.0145577	0.226	0.2966	1	0
ENSMUSG00000021719	Rgs7bp	0.0339353	0.0473301	-0.155895	0.0355519	0.5532	0.616	1	0
ENSMUSG00000075229	Ccdc58	0.0342723	0.0252129	-0.0683343	0.00934332	0.1392	0.1918	1	0
ENSMUSG00000029815	Malsu1	0.0345208	0.0564747	-0.0855941	0.0283588	0.0942	0.1502	1	0
ENSMUSG00000118664	Tusc3	0.0345314	0.0586774	0.181384	0.033942	0.5126	0.4624	1	0
ENSMUSG00000026740	Dnajc1	0.0348684	0.0533534	-0.104154	0.0285498	0.46	0.5398	1	0
ENSMUSG00000079157	Nalf1	0.0349346	0.0183512	-0.12072	0.016533	0.971	0.977	1	0
ENSMUSG00000032042	Srpr	0.0349494	0.0272822	0.125999	0.0291739	0.298	0.237	1	0	SFARI;EAGLE;TADA	0.00051136	Limited	4.75	Discordant	1	0
ENSMUSG00000039953	Clstn1	0.0349506	0.0348025	0.12422	0.017028	0.537	0.4726	1	0
ENSMUSG00000034926	Dhcr24	0.0350555	0.023118	0.0650488	0.00815057	0.1302	0.0864	1	0
ENSMUSG00000012076	Brms1l	0.0350851	0.0557402	-0.0858485	0.0189247	0.1882	0.2508	1	0
ENSMUSG00000001847	Rac1	0.0351212	0.0418332	-0.0594024	0.0231201	0.124	0.1824	1	0	SFARI						1
ENSMUSG00000021748	Pdhb	0.035186	0.0264729	-0.0761638	0.0168857	0.1582	0.214	1	0
ENSMUSG00000007850	Hnrnph1	0.03521	0.0277002	0.10198	0.0257782	0.6072	0.5332	1	0
ENSMUSG00000002028	Kmt2a	0.0352698	0.0244102	0.133404	0.0253618	0.7974	0.7688	1	0	SFARI;EAGLE;TADA	0.00142415	Definitive	18.55	Concordant	1	1
ENSMUSG00000022159	Rab2b	0.0354294	0.0429224	-0.0656394	0.0248363	0.149	0.209	1	0
ENSMUSG00000020069	Hnrnph3	0.0354438	0.0620676	0.111637	0.0165326	0.4292	0.36	1	0
ENSMUSG00000039047	Pigk	0.0354737	0.0292732	-0.174107	0.0361201	0.3792	0.444	1	0
ENSMUSG00000051855	Mest	0.0354813	0.0343927	0.157688	0.0343497	0.23	0.174	1	0
ENSMUSG00000052889	Prkcb	0.0357741	0.032479	0.0970415	0.0342799	0.7696	0.6986	1	0	SFARI					2	0
ENSMUSG00000022437	Samm50	0.0358372	0.0399722	0.0964909	0.0165838	0.2798	0.2188	1	0
ENSMUSG00000030638	Sh3gl3	0.0359222	0.0319686	0.0953228	0.0203264	0.198	0.1444	1	0
ENSMUSG00000026771	Spopl	0.0359356	0.0408896	-0.11535	0.038188	0.322	0.3912	1	0
ENSMUSG00000006575	Rundc3a	0.0359917	0.0473656	0.091883	0.0191282	0.2116	0.154	1	0
ENSMUSG00000052353	Cemip	0.0361988	0.0245465	-0.078713	0.0284572	0.1996	0.2592	1	0
ENSMUSG00000024493	Lars	0.0364842	0.0388458	-0.109119	0.0257228	0.299	0.3704	1	0
ENSMUSG00000039058	Ak5	0.0371072	0.0444537	0.203571	0.0372362	0.2842	0.225	1	0
ENSMUSG00000042369	Rbm45	0.0371273	0.0260291	-0.0565804	0.0106429	0.065	0.1044	1	0
ENSMUSG00000073639	Rab18	0.037167	0.0227296	-0.0894497	0.0108317	0.1452	0.1948	1	0
ENSMUSG00000001525	Tubb5	0.0372478	0.0302248	0.113349	0.0240142	0.1984	0.1458	1	0
ENSMUSG00000038894	Irs2	0.0375883	0.0363337	0.0706673	0.0142385	0.1262	0.0816	1	0
ENSMUSG00000046330	Rpl37a	0.0376786	0.0433294	0.0744182	0.0115183	0.1722	0.1224	1	0
ENSMUSG00000019978	Epb41l2	0.0377233	0.0482517	-0.0778557	0.0239291	0.1396	0.1984	1	0
ENSMUSG00000075324	Fign	0.0377791	0.025593	0.122862	0.0545544	0.1274	0.0842	1	0
ENSMUSG00000001062	Vps9d1	0.0378356	0.0283876	0.0887786	0.0146417	0.251	0.1938	1	0
ENSMUSG00000038296	Galnt18	0.0378655	0.0745143	-0.163273	0.0506893	0.2778	0.3508	1	0
ENSMUSG00000078591	Hs3st4	0.0378939	0.0382646	0.178229	0.0707964	0.4378	0.3648	1	0
ENSMUSG00000003863	Ppfia3	0.0380275	0.0606275	0.0806166	0.0199934	0.2086	0.1472	1	0
ENSMUSG00000039637	Coro7	0.0380517	0.0669209	-0.0799301	0.0267721	0.1272	0.194	1	0
ENSMUSG00000032118	Fez1	0.0380582	0.0314826	-0.0762506	0.0180999	0.2244	0.2872	1	0
ENSMUSG00000066392	Nrxn3	0.0381673	0.0267333	-0.186862	0.0225028	0.992	1	1	0	SFARI;EAGLE		Moderate	11.1	Discordant	1	0
ENSMUSG00000029821	Gsdme	0.0384919	0.0344817	-0.110477	0.0216299	0.183	0.2402	1	0
ENSMUSG00000022108	Itm2b	0.0385832	0.0394221	0.136578	0.0194023	0.627	0.5822	1	0
ENSMUSG00000022956	Atp5o.1	0.0386355	0.0204136	0.0892459	0.0115821	0.221	0.1684	1	0
ENSMUSG00000034825	Nrip3	0.0387159	0.057367	-0.0999946	0.0208883	0.1748	0.2366	1	0
ENSMUSG00000062825	Actg1	0.0387221	0.0274865	0.0775888	0.00882887	0.2232	0.168	1	0
ENSMUSG00000042743	Sgtb	0.0387434	0.030989	-0.076087	0.0247678	0.1128	0.1636	1	0
ENSMUSG00000026452	Syt2	0.0387633	0.0470789	-0.119506	0.0217594	0.0738	0.1184	1	0
ENSMUSG00000032097	Ddx6	0.0390462	0.0414396	0.110013	0.0210855	0.3754	0.314	1	0
ENSMUSG00000022112	Gpc5	0.039112	0.0865774	0.467501	0.226101	0.2212	0.138	0.912844	0.194886	SFARI					3	0
ENSMUSG00000090733	Rps27	0.0395731	0.0271065	0.0682246	0.0127419	0.1808	0.1316	1	0
ENSMUSG00000034453	Polr3b	0.0399095	0.0369278	-0.0667831	0.0139426	0.1056	0.1536	1	0
ENSMUSG00000033352	Map2k4	0.0399457	0.0274385	0.133536	0.0137715	0.697	0.6586	1	0
ENSMUSG00000025907	Rb1cc1	0.0401833	0.0645535	-0.109666	0.0297669	0.481	0.5556	1	0
ENSMUSG00000062044	Lmtk3	0.0403497	0.0300217	0.104478	0.0145441	0.3094	0.2564	1	0	SFARI					3	0
ENSMUSG00000022012	Enox1	0.0403882	0.0318907	-0.208459	0.0226316	0.718	0.7468	1	0
ENSMUSG00000024097	Srsf7	0.0404392	0.0294182	0.117257	0.0144104	0.371	0.3148	1	0
ENSMUSG00000025979	Mob4	0.0405504	0.0251162	-0.0730879	0.0107891	0.1476	0.1994	1	0
ENSMUSG00000036564	Ndrg4	0.0406142	0.0474834	0.137345	0.0356499	0.5434	0.4878	1	0
ENSMUSG00000072964	Bhlhb9	0.0408104	0.0422239	0.0772437	0.00981998	0.1574	0.111	1	0
ENSMUSG00000032220	Myo1e	0.0408506	0.0281511	-0.0946827	0.0173204	0.0854	0.1272	1	0	SFARI					2	0
ENSMUSG00000000374	Trappc10	0.040922	0.0389958	-0.0593398	0.0160033	0.1542	0.2134	1	0
ENSMUSG00000002221	Paxip1	0.0410144	0.0541728	0.0699947	0.0145376	0.18	0.1264	1	0
ENSMUSG00000022217	Emc9	0.0410875	0.0219903	-0.0614793	0.00655994	0.0904	0.1328	1	0
ENSMUSG00000100891	2810049E08Rik	0.0411312	0.0605013	-0.0804337	0.0297898	0.166	0.2298	1	0
ENSMUSG00000061887	Ssbp3	0.0412712	0.0534743	0.0950709	0.0303317	0.2228	0.1614	1	0
ENSMUSG00000037400	Atp11b	0.0413147	0.0304536	-0.0972121	0.0218566	0.6306	0.7244	1	0
ENSMUSG00000020599	Rgs9	0.0413314	0.0567843	0.0708827	0.0492313	0.1852	0.1262	1	0
ENSMUSG00000060450	Rnf14	0.0413348	0.025993	-0.09653	0.0254094	0.2386	0.2972	1	0
ENSMUSG00000059981	Taok2	0.0413849	0.0255459	0.068952	0.00947997	0.1634	0.1172	1	0	SFARI					2	0
ENSMUSG00000097451	Rian	0.0413871	0.0348019	0.0706605	0.0145848	0.9892	0.9964	1	0
ENSMUSG00000017740	Slc12a5	0.0415458	0.0782068	0.140736	0.0288593	0.4522	0.392	1	0	SFARI					2	0
ENSMUSG00000017485	Top2b	0.0415565	0.0289352	-0.0910388	0.0205157	0.4406	0.511	1	0	SFARI					2	0
ENSMUSG00000029179	Zcchc4	0.0415833	0.0241589	-0.0675624	0.0101635	0.0982	0.1424	1	0
ENSMUSG00000034663	Bmp2k	0.0416748	0.0465903	-0.0728543	0.0162267	0.1054	0.1536	1	0
ENSMUSG00000055629	B4galnt4	0.0417279	0.0527922	0.112572	0.0191132	0.2412	0.185	1	0
ENSMUSG00000027624	Epb41l1	0.0417711	0.0469184	0.115752	0.0340273	0.625	0.566	1	0
ENSMUSG00000038495	Otud7b	0.0418759	0.0608709	-0.100789	0.0271109	0.182	0.2482	1	0
ENSMUSG00000052551	Adarb2	0.0418787	0.0399953	-1.22056	0.124435	0.3012	0.3354	1	0
ENSMUSG00000028041	Adam15	0.0420115	0.0536577	0.084798	0.0155197	0.1778	0.126	1	0
ENSMUSG00000016427	Ndufa1	0.0420272	0.0250308	0.0550841	0.00702597	0.1142	0.0742	1	0
ENSMUSG00000056211	R3hdm1	0.0421913	0.0413947	0.122866	0.0208875	0.8486	0.8252	1	0
ENSMUSG00000035392	Dennd1a	0.0423503	0.0491664	0.10405	0.027437	0.8302	0.7772	1	0
ENSMUSG00000019979	Apaf1	0.0424477	0.0380662	-0.0462081	0.0127567	0.1062	0.1546	1	0
ENSMUSG00000035469	Rcbtb1	0.0424561	0.0541361	-0.0787435	0.0216753	0.128	0.1834	1	0
ENSMUSG00000038608	Dock10	0.042513	0.0651781	0.227673	0.0384465	0.5342	0.4706	1	0
ENSMUSG00000062661	Ncs1	0.042611	0.0442394	0.0950159	0.021758	0.3002	0.2366	1	0
ENSMUSG00000020954	Strn3	0.0427015	0.0241634	-0.0987255	0.0140346	0.7472	0.7952	1	0
ENSMUSG00000041977	Arhgef11	0.0427076	0.0480859	-0.112026	0.0252112	0.4996	0.5672	1	0
ENSMUSG00000032267	Usp28	0.0428794	0.0459965	-0.0642789	0.0189957	0.1582	0.216	1	0
ENSMUSG00000030421	Uri1	0.0429882	0.0813582	-0.124387	0.0388069	0.4764	0.5602	1	0
ENSMUSG00000034826	Nup54	0.0432802	0.0366353	-0.0691834	0.014866	0.1232	0.1718	1	0
ENSMUSG00000101640	Gm28376	0.0433217	0.0347748	-0.0646598	0.0139517	0.0978	0.1424	1	0
ENSMUSG00000108532	Gm32647	0.0434739	0.0771425	0.389128	0.0573465	0.3238	0.2564	1	0
ENSMUSG00000025576	Rbfox3	0.0435166	0.0513445	0.136644	0.0255299	0.6564	0.6122	1	0
ENSMUSG00000040111	Gramd1b	0.0435834	0.0409079	0.127948	0.020456	0.504	0.4432	1	0
ENSMUSG00000038299	Wdr36	0.0437852	0.0466395	-0.0782339	0.0202962	0.1384	0.1908	1	0
ENSMUSG00000045658	Pid1	0.0437931	0.0436212	-0.194467	0.0255118	0.4524	0.5196	1	0
ENSMUSG00000112437	Gm35188	0.0438275	0.0379158	-0.0934236	0.0270441	0.4934	0.5532	1	0
ENSMUSG00000002012	Pnck	0.0438853	0.0576527	0.0626058	0.0156749	0.1482	0.1004	1	0
ENSMUSG00000049744	Arhgap15	0.0441541	0.0499935	-0.0838382	0.00943186	0.0794	0.121	1	0
ENSMUSG00000054455	Vapb	0.0441678	0.0469137	-0.0820522	0.0121319	0.1526	0.2036	1	0
ENSMUSG00000028161	Ppp3ca	0.0442643	0.0248418	0.110621	0.0243331	0.8842	0.867	1	0	SFARI					3	1
ENSMUSG00000030982	Vps35l	0.0443559	0.0370342	-0.0794292	0.0263947	0.2338	0.3	1	0
ENSMUSG00000023868	Pde10a	0.0443567	0.0662998	-0.138792	0.0515592	0.86	0.8996	1	0
ENSMUSG00000029253	Cenpc1	0.044438	0.0345933	-0.106467	0.012918	0.349	0.406	1	0
ENSMUSG00000043668	Tox3	0.0444472	0.0459991	-0.145075	0.0280627	0.2564	0.3234	1	0
ENSMUSG00000074582	Arfgef2	0.0447333	0.0435285	-0.0982594	0.0164344	0.3672	0.4376	1	0
ENSMUSG00000086708	Gm15577	0.0447512	0.0437069	0.0840921	0.0130414	0.2114	0.1602	1	0
ENSMUSG00000068015	Lrch1	0.0448916	0.0518612	0.0946933	0.0261675	0.5626	0.4838	1	0
ENSMUSG00000070304	Scn2b	0.0448926	0.0376276	0.0569913	0.0108364	0.14	0.0958	1	0
ENSMUSG00000039384	Dusp10	0.0449628	0.0505992	-0.0711381	0.0390725	0.0988	0.1502	1	0
ENSMUSG00000027809	Etfdh	0.0449763	0.0436916	-0.0741805	0.0178837	0.1204	0.1686	1	0
ENSMUSG00000034686	Prr7	0.045038	0.0247379	0.0518043	0.00701259	0.1066	0.0686	1	0
ENSMUSG00000024548	Setbp1	0.0452511	0.0321641	-0.118201	0.0149698	0.7692	0.8096	1	0	SFARI					1	0
ENSMUSG00000054843	Atrnl1	0.0453644	0.0604694	-0.120476	0.0444868	0.6498	0.6896	1	0
ENSMUSG00000008206	Cers4	0.0454452	0.0422267	0.0789126	0.0244157	0.3828	0.3218	1	0
ENSMUSG00000020647	Ncoa1	0.0455341	0.0453114	-0.125204	0.0213726	0.7174	0.7876	1	0	SFARI;EAGLE		Limited	3	Discordant	1	0
ENSMUSG00000026764	Kif5c	0.0456254	0.0359458	-0.113704	0.0192293	0.5798	0.6336	1	0	SFARI;TADA	0.017695				2	1
ENSMUSG00000045875	Adra1a	0.0457011	0.084635	-0.142908	0.051625	0.3004	0.3732	1	0
ENSMUSG00000024376	Epb41l4a	0.0457998	0.0533935	-0.126309	0.0262487	0.1036	0.1488	1	0
ENSMUSG00000037851	Iars	0.045818	0.0591341	-0.0887787	0.0309588	0.2322	0.2974	1	0
ENSMUSG00000038390	Gpr162	0.0459119	0.0535655	0.0847404	0.0275356	0.2884	0.2232	1	0
ENSMUSG00000019923	Zwint	0.0461842	0.0467897	0.0964731	0.0272216	0.5744	0.517	1	0
ENSMUSG00000019039	Dalrd3	0.0462086	0.0601243	0.161042	0.020366	0.5704	0.5244	1	0
ENSMUSG00000035596	Mboat7	0.0462627	0.0557985	0.0693112	0.0126522	0.1794	0.1294	1	0	SFARI;EAGLE		Limited	5.25	Discordant	1	1
ENSMUSG00000033253	Szt2	0.046288	0.0394931	0.0683479	0.0116952	0.138	0.0944	1	0
ENSMUSG00000046603	Tcaim	0.0463018	0.0333056	-0.055903	0.0128431	0.0812	0.123	1	0
ENSMUSG00000033060	Lmo7	0.046509	0.0735188	0.113713	0.0308234	0.1242	0.081	1	0
ENSMUSG00000041236	Vps41	0.0465973	0.0299187	-0.102208	0.0232274	0.4018	0.4682	1	0
ENSMUSG00000022747	St3gal6	0.0466139	0.0317007	-0.0745619	0.0115771	0.0718	0.1106	1	0
ENSMUSG00000026615	Eprs	0.0466856	0.0517425	-0.1169	0.0298216	0.3572	0.4188	1	0
ENSMUSG00000098145	Gm26936	0.0467477	0.0317544	-0.0716344	0.00830506	0.1726	0.2272	1	0
ENSMUSG00000067787	Blcap	0.0467525	0.0478639	0.0723502	0.0159086	0.157	0.1094	1	0
ENSMUSG00000049422	Chchd10	0.0468059	0.057718	0.118524	0.0345475	0.2594	0.2	1	0
ENSMUSG00000043929	Klhl15	0.0470953	0.029682	-0.0851504	0.0161067	0.215	0.2718	1	0
ENSMUSG00000063698	Sfxn4	0.047198	0.0815282	-0.0666002	0.0186974	0.1138	0.1676	1	0
ENSMUSG00000042298	Ttc19	0.047199	0.0224066	-0.110391	0.0115629	0.4976	0.5464	1	0
ENSMUSG00000041794	Myrip	0.047301	0.0610812	-0.0998979	0.026083	0.2858	0.351	1	0
ENSMUSG00000021809	Nudt13	0.0476802	0.023427	-0.0452228	0.00901286	0.0772	0.1172	1	0
ENSMUSG00000020650	Bcap29	0.0478733	0.0424194	0.102671	0.0146278	0.2156	0.1676	1	0
ENSMUSG00000046449	Nexmif	0.0481432	0.0442934	0.142967	0.023111	0.4474	0.3964	1	0	SFARI					1	0
ENSMUSG00000022265	Ank	0.0481478	0.0547955	-0.130799	0.0384023	0.3648	0.437	1	0
ENSMUSG00000079477	Rab7	0.0481887	0.0221449	-0.0611052	0.00617976	0.1898	0.2452	1	0
ENSMUSG00000003345	Csnk1g2	0.0482297	0.0512125	0.0639172	0.0162141	0.1622	0.1128	1	0
ENSMUSG00000035900	Gramd4	0.0483602	0.0352124	0.0904949	0.011191	0.1978	0.1498	1	0	EAGLE		No scorable evidence	0	Concordant
ENSMUSG00000017400	Stac2	0.0483672	0.0629665	-0.104944	0.0303851	0.1176	0.1732	1	0
ENSMUSG00000019256	Ahr	0.0485561	0.0458085	-0.0700538	0.0249446	0.0686	0.1112	1	0
ENSMUSG00000016831	Tox4	0.0486318	0.0234122	-0.044718	0.00416086	0.109	0.1542	1	0
ENSMUSG00000025871	4833439L19Rik	0.0487243	0.0305664	-0.0587436	0.00989419	0.0726	0.111	1	0
ENSMUSG00000037197	Rbm17	0.048766	0.0347921	0.0716479	0.016491	0.151	0.1064	1	0
ENSMUSG00000029432	Nipsnap2	0.0488924	0.0232897	-0.0825583	0.0175164	0.2688	0.3332	1	0
ENSMUSG00000029141	Slc4a1ap	0.0490636	0.0240843	-0.070039	0.0103544	0.119	0.163	1	0
ENSMUSG00000039219	Arid4b	0.0493144	0.0857735	0.157227	0.0336648	0.657	0.6242	1	0
ENSMUSG00000048988	Elfn1	0.0493859	0.0476671	-0.0984562	0.0254427	0.1738	0.2266	1	0
ENSMUSG00000036752	Tubb4b	0.0494077	0.0326759	0.0869575	0.0142957	0.1728	0.128	1	0
ENSMUSG00000030556	Lrrc28	0.0495552	0.0308554	-0.0988793	0.0137455	0.2616	0.3188	1	0
ENSMUSG00000031391	L1cam	0.0495736	0.0575591	0.108678	0.0270511	0.2648	0.2106	1	0
ENSMUSG00000037275	Gemin5	0.0496328	0.0270065	-0.0564464	0.00583568	0.0924	0.1344	1	0
ENSMUSG00000025586	Cpeb1	0.0496601	0.03942	-0.105171	0.0167802	0.3734	0.4334	1	0
ENSMUSG00000064068	Mtx1	0.049685	0.041262	0.0602911	0.0150413	0.1048	0.0666	1	0
ENSMUSG00000051510	Mafg	0.049689	0.0135205	-0.0696766	0.00391048	0.2168	0.272	1	0
ENSMUSG00000052155	Acvr2a	0.0498436	0.0494133	0.16686	0.0257671	0.4392	0.4	1	0

## Sheet: Astrocyte
ensembl	gene	p_val.mean	p_val.std	avg_log2FC.mean	avg_log2FC.std	pct.1.mean	pct.2.mean	padj.mean	padj.std	ASD.status	TADA.FDR	EAGLE.annotation	EAGLE.score	EAGLE.concordance	SFARI.score	SFARI.syndromic
ENSMUSG00000024109	Nrxn1	6.13358e-07	6.12138e-07	-0.433122	0.0541479	1	1	0.0185737	0.0185368	SFARI;EAGLE		Definitive	143.75	Concordant	1	0
ENSMUSG00000061080	Lsamp	6.22454e-07	8.61262e-07	-0.500712	0.0378791	1	1	0.0188491	0.0260807
ENSMUSG00000021268	Meg3	8.98003e-07	1.74572e-06	0.800947	0.0985125	0.97325	0.959	0.0271933	0.0528639
ENSMUSG00000022840	Adcy5	3.39188e-06	5.53979e-06	0.578321	0.0698365	0.80925	0.56975	0.102713	0.167756	SFARI					2	0
ENSMUSG00000074776	Gm10754	4.38067e-06	6.7317e-06	0.640641	0.0916817	0.77675	0.50825	0.132656	0.203849
ENSMUSG00000039539	Sgcz	5.67509e-06	9.95163e-06	0.745277	0.0561858	0.986	0.945	0.171853	0.301355
ENSMUSG00000028033	Kcnq5	6.22513e-06	8.12009e-06	0.704123	0.0443188	0.9795	0.947	0.188509	0.245893
ENSMUSG00000056755	Grm7	1.09633e-05	1.48556e-05	0.56324	0.0245536	0.97725	0.961	0.331991	0.449858	SFARI					2	0
ENSMUSG00000049583	Grm5	1.24663e-05	1.26422e-05	0.818124	0.0663688	0.992	0.971	0.377505	0.382831	SFARI					2	0
ENSMUSG00000024524	Gnal	1.43726e-05	2.28387e-05	0.505501	0.0356153	0.7235	0.47325	0.319407	0.463073
ENSMUSG00000021991	Cacna2d3	1.94222e-05	2.5491e-05	0.749057	0.0523103	0.98175	0.951	0.41216	0.442847	SFARI;EAGLE		Limited	3.75	Discordant	1	0
ENSMUSG00000020599	Rgs9	2.03949e-05	3.69922e-05	0.523996	0.0152858	0.6785	0.416	0.293175	0.471547
ENSMUSG00000025372	Baiap2	2.60894e-05	5.00332e-05	0.382705	0.0554456	0.6475	0.336	0.274535	0.485064
ENSMUSG00000027827	Kcnab1	3.07122e-05	2.2316e-05	0.475254	0.0511398	0.94075	0.8175	0.753818	0.479063
ENSMUSG00000025221	Kcnip2	3.28359e-05	3.25584e-05	0.364945	0.0366858	0.20075	0.02675	0.594242	0.474811
ENSMUSG00000096914	Galntl6	3.61543e-05	4.70313e-05	0.519418	0.0909428	0.94275	0.875	0.55574	0.476721
ENSMUSG00000041986	Elmod1	4.20239e-05	6.23512e-05	0.44328	0.0574201	0.79075	0.60875	0.509262	0.485349
ENSMUSG00000028176	Lrrc7	4.30681e-05	5.1274e-05	0.519679	0.03555	0.986	0.955	0.553689	0.515484
ENSMUSG00000104093	A330015K06Rik	4.32432e-05	6.64202e-05	0.464824	0.0538135	0.699	0.4385	0.491005	0.504818
ENSMUSG00000101621	Gm28905	4.3815e-05	8.1255e-05	0.480965	0.0526268	0.52675	0.25825	0.323164	0.462294
ENSMUSG00000027419	Pcsk2	6.40376e-05	0.000123606	0.568263	0.115064	0.961	0.918	0.300868	0.468678
ENSMUSG00000026204	Ptprn	7.00364e-05	4.26531e-05	0.290322	0.0390433	0.7215	0.4855	0.967709	0.0645815
ENSMUSG00000041380	Htr2c	7.73606e-05	0.000137582	0.520034	0.0922647	0.4795	0.21925	0.446187	0.413306
ENSMUSG00000052572	Dlg2	9.308e-05	0.000158351	0.622754	0.109042	1	0.984	0.569234	0.412711	SFARI					2	0
ENSMUSG00000060371	Caln1	0.000108533	0.000120839	0.458201	0.0991972	0.922	0.80525	0.769815	0.46037
ENSMUSG00000043635	Adamts3	0.000121268	0.000189445	0.449706	0.0552447	0.475	0.24375	0.774564	0.358848
ENSMUSG00000051331	Cacna1c	0.000127466	0.000129922	0.437239	0.0545723	0.957	0.8935	0.758899	0.482201	SFARI					1	1
ENSMUSG00000059974	Ntm	0.000127773	0.000210698	-0.50332	0.0766495	1	1	0.53328	0.541021
ENSMUSG00000036510	Cdh8	0.000130431	0.000122368	0.445761	0.0771942	0.85825	0.69475	0.802753	0.394494	SFARI					2	0
ENSMUSG00000020900	Myh10	0.000138011	0.000121838	0.323321	0.0456387	0.2255	0.051	0.989862	0.0202769	SFARI					2	0
ENSMUSG00000008658	Rbfox1	0.000151305	0.000221366	0.805717	0.137208	0.994	0.973	0.750709	0.498582	SFARI					2	0
ENSMUSG00000040640	Erc2	0.000151502	0.000163795	0.285597	0.0390481	0.988	0.951	0.734112	0.30806
ENSMUSG00000032356	Rasgrf1	0.000170519	0.000287133	0.368576	0.0469422	0.6455	0.39725	0.557769	0.510674
ENSMUSG00000044349	Snhg11	0.000172782	0.00032625	0.467618	0.0590773	0.969	0.951	0.46965	0.377493
ENSMUSG00000057897	Camk2b	0.000178763	0.000318823	0.305701	0.0602697	0.746	0.49175	0.580132	0.494887	SFARI						1
ENSMUSG00000029516	Cit	0.000183789	0.000307917	0.339341	0.0937795	0.453	0.19275	0.519191	0.555907
ENSMUSG00000048960	Prex2	0.000202789	0.000255615	-0.47381	0.0318558	0.7275	0.836	1	0
ENSMUSG00000053477	Tcf4	0.000213952	0.000183113	-0.400641	0.0469456	0.955	0.988	0.956361	0.0872777	SFARI;EAGLE;TADA	0.00271594	Definitive	13.5	Concordant	1	1
ENSMUSG00000061576	Dpp6	0.000225722	0.000169332	0.303914	0.0302125	0.953	0.8525	0.794303	0.411393	SFARI					2	0
ENSMUSG00000026657	Frmd4a	0.000229236	0.000243121	-0.483483	0.0313872	0.965	0.98575	0.897256	0.121115
ENSMUSG00000052581	Lrrtm4	0.000262053	0.000371005	0.384536	0.0936928	0.97525	0.94275	0.783337	0.433325
ENSMUSG00000036273	Lrrk2	0.000300011	0.000516071	0.306709	0.0622509	0.53275	0.28675	0.860941	0.278117
ENSMUSG00000062184	Hs6st2	0.000305126	0.000379745	0.344829	0.0617247	0.42225	0.201	0.774844	0.263367
ENSMUSG00000054162	Spock3	0.000309947	0.000593264	0.71866	0.0563681	0.94075	0.867	0.552495	0.312045
ENSMUSG00000022311	Csmd3	0.000326453	0.00046108	0.490853	0.104385	0.986	0.98375	0.861174	0.277652	SFARI					3	0
ENSMUSG00000031906	Smpd3	0.000331183	0.000281354	0.385535	0.0955041	0.23575	0.06175	0.766041	0.467918
ENSMUSG00000036902	Neto2	0.000345896	0.000530311	0.443114	0.0421358	0.5065	0.2785	0.855361	0.289277
ENSMUSG00000057060	Slc35f3	0.00037829	0.000715359	0.316712	0.0158416	0.66425	0.40375	0.555692	0.514643
ENSMUSG00000021219	Rgs6	0.000467391	0.000370695	-0.563595	0.0740712	0.5185	0.70875	0.883354	0.233292
ENSMUSG00000032936	Camkv	0.000481671	0.000154016	0.403899	0.0237425	0.41175	0.21525	1	0
ENSMUSG00000020719	Ddx5	0.000488882	0.000129617	0.385287	0.0237143	1	0.994	1	0
ENSMUSG00000022052	Ppp2r2a	0.00049959	0.000311313	0.319191	0.0621024	0.4755	0.248	1	0
ENSMUSG00000058571	Gpc6	0.000537345	0.000339769	-0.376732	0.0425189	0.75	0.887	1	0	SFARI					2	0
ENSMUSG00000109006	B230209E15Rik	0.000564021	0.00108768	0.332633	0.0613016	0.539	0.29075	0.597782	0.487071
ENSMUSG00000022112	Gpc5	0.000598986	0.000785603	-0.470222	0.0687505	0.8975	0.914	0.965292	0.0694153	SFARI					3	0
ENSMUSG00000063446	Plppr1	0.000608364	0.00110384	0.346539	0.0299393	0.3585	0.14375	0.81558	0.36884
ENSMUSG00000045441	Gprin3	0.000621146	0.00107856	0.278711	0.0763761	0.19075	0.033	0.819302	0.361396
ENSMUSG00000016349	Eef1a2	0.000629778	0.000297776	0.221133	0.00935427	0.15175	0.027	1	0	SFARI						1
ENSMUSG00000023150	Ivns1abp	0.000653983	0.000357274	0.368086	0.0397398	0.52075	0.29525	1	0
ENSMUSG00000050321	Neto1	0.000673122	0.000858727	0.298982	0.0655427	0.918	0.79925	1	0
ENSMUSG00000006586	Runx1t1	0.000682635	0.000481078	0.237875	0.0341995	0.71325	0.48775	1	0	TADA	0.0352799
ENSMUSG00000053465	Hs6st3	0.000691864	0.00136785	0.644086	0.133424	0.9365	0.8995	0.430508	0.441124
ENSMUSG00000000197	Nalcn	0.000699885	0.000389028	0.224487	0.0384345	0.7785	0.59425	1	0
ENSMUSG00000057182	Scn3a	0.000702171	0.0013724	0.365353	0.070604	0.5635	0.30925	0.57941	0.491119
ENSMUSG00000030854	Ptpn5	0.000703463	0.00106369	0.387869	0.0711355	0.4365	0.2255	0.94285	0.1143
ENSMUSG00000026090	Cracdl	0.000706975	0.000794197	0.33006	0.04689	0.418	0.203	0.957098	0.0858033
ENSMUSG00000045349	Sh2d5	0.000732266	0.00121898	0.292797	0.0283851	0.16175	0.02675	1	0
ENSMUSG00000060534	Dcc	0.000735018	0.000785371	0.48511	0.0238455	0.994	0.9795	0.859016	0.281967	SFARI					2	0
ENSMUSG00000057914	Cacnb2	0.000806668	0.00138529	0.542844	0.0833456	0.96925	0.914	1	0	SFARI					2	0
ENSMUSG00000011751	Sptbn4	0.000855372	0.000998137	0.301362	0.0438115	0.3835	0.17825	0.937944	0.124112
ENSMUSG00000022883	Robo1	0.000863085	0.000557813	0.27503	0.0539018	0.986	0.963	1	0
ENSMUSG00000032625	Thsd7a	0.000881695	0.000368461	0.252515	0.0405855	0.793	0.61075	1	0
ENSMUSG00000002459	Rgs20	0.000897146	0.000990499	-0.487977	0.0710077	0.783	0.86875	1	0
ENSMUSG00000035653	Lrfn5	0.000930307	0.0015054	0.279365	0.0630488	0.965	0.926	0.758021	0.342377	SFARI					2	0
ENSMUSG00000062257	Opcml	0.000936851	0.000554882	0.313657	0.131116	0.947	0.959	1	0
ENSMUSG00000036192	Rorb	0.000945182	0.00164698	-0.557436	0.0875803	0.69875	0.78275	1	0	SFARI;EAGLE;TADA	4.77e-07	Moderate	8.25	Discordant	1	1
ENSMUSG00000020297	Nsg2	0.000956479	0.000808151	0.307917	0.0625546	0.15575	0.02875	1	0
ENSMUSG00000042388	Dlgap3	0.000991068	0.00105405	0.21578	0.016144	0.1745	0.037	1	0	SFARI					2	0
ENSMUSG00000057455	Rit2	0.000997175	0.00106776	0.287404	0.0470661	0.7685	0.58425	1	0	SFARI					2	0
ENSMUSG00000058589	Anks1b	0.00101728	0.00135881	0.526487	0.0937907	0.986	0.967	0.722898	0.400262	SFARI					2	1
ENSMUSG00000060988	Galnt13	0.00102682	0.00199365	0.428761	0.0657793	0.97325	0.8955	0.572284	0.497211	SFARI					2	0
ENSMUSG00000038665	Dgki	0.00103051	0.00190659	0.367107	0.0571343	0.97525	0.93425	0.805535	0.388929
ENSMUSG00000024302	Dtna	0.00105224	0.000892022	-0.363318	0.0125885	0.926	0.97325	1	0
ENSMUSG00000039735	Fnbp1l	0.00107638	0.00113115	0.288313	0.0434152	0.82775	0.65775	0.897979	0.204043
ENSMUSG00000062296	Trank1	0.00110466	0.000242796	0.236926	0.0367945	0.84625	0.71925	1	0
ENSMUSG00000030134	Rasgef1a	0.00119489	0.00227707	0.350142	0.0670278	0.65975	0.43425	0.768532	0.462936
ENSMUSG00000055026	Gabrg3	0.00121588	0.00238428	0.495257	0.0976997	0.973	0.922	0.623957	0.469496	SFARI					2	0
ENSMUSG00000034818	Celf5	0.00122455	0.00188808	0.237469	0.0284355	0.199	0.05125	1	0
ENSMUSG00000023868	Pde10a	0.00124162	0.00163487	0.75783	0.0911218	0.975	0.963	0.920154	0.159692
ENSMUSG00000097451	Rian	0.00130418	0.00260346	0.461699	0.111751	0.955	0.928	0.305599	0.464846
ENSMUSG00000032503	Arpp21	0.00131067	0.00258776	0.378947	0.0915369	0.965	0.924	0.622431	0.447998
ENSMUSG00000015143	Actn1	0.00131186	0.00180898	0.369689	0.0352663	0.2215	0.06575	1	0
ENSMUSG00000051401	Kctd16	0.00138458	0.00205918	0.376051	0.103186	0.94475	0.932	1	0
ENSMUSG00000097545	Mir124a-1hg	0.00146438	0.00258063	0.289898	0.0555911	0.64125	0.412	0.818624	0.362752
ENSMUSG00000058254	Tspan7	0.00150593	0.00180805	-0.317522	0.0605704	0.969	0.984	1	0	SFARI					2	0
ENSMUSG00000026223	Itm2c	0.00153024	0.00163519	0.544249	0.064761	0.447	0.26225	1	0
ENSMUSG00000061911	Myt1l	0.00154608	0.00156397	0.321492	0.0306873	0.94475	0.9015	1	0	SFARI;EAGLE;TADA	7.02e-08	Definitive	20.35	Concordant	1	0
ENSMUSG00000054477	Kcnn2	0.00158917	0.0019283	-0.524166	0.14408	0.46325	0.65175	0.793295	0.413411
ENSMUSG00000057378	Ryr3	0.00161943	0.00315518	0.589271	0.0527846	0.9325	0.88525	0.767867	0.464266
ENSMUSG00000000088	Cox5a	0.00165103	0.001984	0.361455	0.0713367	0.254	0.092	1	0
ENSMUSG00000060882	Kcnd2	0.00165209	0.00167933	0.696236	0.0677372	0.988	0.98175	1	0	SFARI					2	0
ENSMUSG00000000632	Sez6	0.00169893	0.00261743	0.308159	0.0476316	0.19275	0.04925	1	0
ENSMUSG00000022489	Pde1b	0.00171685	0.00138835	0.306565	0.00769126	0.19875	0.0615	1	0
ENSMUSG00000001270	Ckb	0.0017274	0.00212408	0.408478	0.072944	0.9035	0.70275	1	0
ENSMUSG00000037148	Arhgap10	0.0017374	0.00173598	0.300485	0.0488384	0.203	0.05725	1	0
ENSMUSG00000062151	Unc13c	0.0017547	0.002612	0.338123	0.0390768	0.5655	0.34625	1	0
ENSMUSG00000019899	Lama2	0.00175633	0.00306751	-0.501803	0.103691	0.504	0.69275	1	0
ENSMUSG00000019828	Grm1	0.00175796	0.00219787	0.346934	0.0171842	0.887	0.77825	1	0
ENSMUSG00000003974	Grm3	0.00177185	0.00202423	-0.425918	0.0454838	0.992	0.97325	1	0
ENSMUSG00000029212	Gabrb1	0.00184125	0.00119424	-0.3274	0.0273175	0.992	0.992	1	0
ENSMUSG00000035864	Syt1	0.00188081	0.0035881	0.348115	0.0924412	0.967	0.949	0.757784	0.484432	SFARI;TADA	0.016653					1
ENSMUSG00000024044	Epb41l3	0.00191571	0.00162864	0.224913	0.0622509	0.39125	0.19875	0.989243	0.0215135
ENSMUSG00000003660	Snrnp200	0.00191983	0.00164755	0.206304	0.0347721	0.1825	0.04725	1	0
ENSMUSG00000028572	Hook1	0.00194497	0.00235793	0.218464	0.0462395	0.15775	0.0305	0.877822	0.244356
ENSMUSG00000035620	Ric8b	0.0019554	0.00339263	0.326868	0.051509	0.36675	0.16625	1	0
ENSMUSG00000036712	Cyld	0.00196116	0.001598	0.241082	0.0262582	0.51025	0.29125	1	0
ENSMUSG00000041762	Gpr155	0.00203408	0.00265237	0.353434	0.0638007	0.19675	0.0595	1	0
ENSMUSG00000025658	Cnksr2	0.00203663	0.00352528	0.279893	0.0188413	0.963	0.93225	1	0	SFARI					2	1
ENSMUSG00000038902	Pogz	0.00203722	0.000710323	0.325502	0.0342617	0.18875	0.05975	1	0	SFARI;EAGLE;TADA	0	Definitive	35.4	Concordant	1	1
ENSMUSG00000059291	Rpl11	0.00211809	0.00216866	0.265828	0.0477982	0.172	0.043	1	0
ENSMUSG00000056427	Slit3	0.00212229	0.00292177	0.231559	0.0475048	0.889	0.76625	1	0
ENSMUSG00000038970	Lmtk2	0.00213323	0.00231039	0.282292	0.0571195	0.1825	0.045	1	0
ENSMUSG00000004961	Syt5	0.00218087	0.00216175	0.257009	0.039286	0.125	0.0185	1	0
ENSMUSG00000036564	Ndrg4	0.00222011	0.00104404	0.4019	0.0227147	0.465	0.287	1	0
ENSMUSG00000025576	Rbfox3	0.00223685	0.0039455	0.314179	0.0727888	0.85875	0.744	1	0
ENSMUSG00000022748	Cmss1	0.00228227	0.0040126	0.533266	0.0455119	0.9405	0.924	1	0
ENSMUSG00000027737	Slc7a11	0.00229761	0.00240513	-0.415068	0.0433704	0.1435	0.30925	1	0
ENSMUSG00000052374	Actn2	0.00239152	0.00302477	0.256758	0.0256262	0.16375	0.041	1	0
ENSMUSG00000021010	Npas3	0.00243295	0.00473771	-0.545867	0.114269	0.797	0.87075	0.8685	0.263
ENSMUSG00000004933	Matk	0.00246238	0.00249382	0.184936	0.0574175	0.1415	0.0225	0.931851	0.136299
ENSMUSG00000024077	Strn	0.00252483	0.00430165	0.347855	0.0458594	0.75625	0.5635	1	0
ENSMUSG00000017491	Rarb	0.00257231	0.00101761	0.407392	0.0184363	0.81125	0.69475	1	0
ENSMUSG00000032537	Ephb1	0.00259517	0.002403	0.30504	0.0642185	0.711	0.47975	1	0	SFARI					3	0
ENSMUSG00000031309	Rps6ka3	0.0026304	0.00490673	0.254033	0.0830238	0.783	0.58	1	0	SFARI					2	1
ENSMUSG00000098097	6530403H02Rik	0.00268508	0.00491516	0.396622	0.126705	0.32175	0.13725	0.828743	0.342515
ENSMUSG00000110080	Gm6145	0.00268978	0.00388538	-0.318397	0.0513198	0.293	0.49175	1	0
ENSMUSG00000001700	Gramd3	0.00270364	0.00307564	-0.277093	0.0284251	0.232	0.4115	1	0
ENSMUSG00000019996	Map7	0.00270714	0.00179419	0.216124	0.0551967	0.62075	0.41825	1	0
ENSMUSG00000030067	Foxp1	0.00271195	0.00171527	0.452482	0.0413348	0.9385	0.8545	1	0	SFARI;EAGLE;TADA	0	Definitive	60.45	Concordant	1	1
ENSMUSG00000033676	Gabrb3	0.00274346	0.00544695	0.337096	0.0855389	0.967	0.90375	0.695354	0.402257	SFARI					1	0
ENSMUSG00000071866	Ppia	0.00276167	0.00384897	0.401698	0.0808006	0.33825	0.15775	1	0
ENSMUSG00000039419	Cntnap2	0.00281534	0.00550874	0.829845	0.14124	0.959	0.953	0.654193	0.417433	SFARI;EAGLE		Refuted	—	Discordant	2	1
ENSMUSG00000022321	Cdh10	0.00285186	0.00371139	-0.508649	0.0709753	0.86075	0.912	0.867459	0.265081	SFARI					2	0
ENSMUSG00000028833	Ncdn	0.00294423	0.0022833	0.253041	0.034729	0.15375	0.037	1	0
ENSMUSG00000028173	Wls	0.00311358	0.00344176	-0.324628	0.0322332	0.10225	0.252	1	0
ENSMUSG00000025656	Arhgef9	0.00311541	0.00341579	0.28265	0.0749826	0.713	0.51825	1	0	SFARI;EAGLE		Definitive	14.2	Concordant	1	1
ENSMUSG00000029713	Gnb2	0.00317282	0.00393978	0.346577	0.0739657	0.20925	0.0655	1	0	SFARI						1
ENSMUSG00000034751	Mast4	0.00324346	0.00513737	-0.461398	0.116404	0.73975	0.797	1	0
ENSMUSG00000030310	Slc6a1	0.00324551	0.0033219	0.285418	0.0559329	0.459	0.256	1	0	SFARI;EAGLE;TADA	5.91e-10	Definitive	31.15	Concordant	1	1
ENSMUSG00000032238	Rora	0.00324713	0.00465699	-0.306315	0.0434722	1	0.998	1	0	SFARI						1
ENSMUSG00000004113	Cacna1b	0.00333745	0.00651887	0.286312	0.0617881	0.463	0.24375	0.884772	0.230456	SFARI					2	0
ENSMUSG00000030695	Aldoa	0.00335567	0.00544375	0.344378	0.115226	0.334	0.1395	0.801187	0.397626
ENSMUSG00000007617	Homer1	0.00337402	0.00309193	0.264594	0.0342671	0.914	0.79525	1	0	SFARI					2	0
ENSMUSG00000020263	Appl2	0.00340106	0.00494178	-0.402741	0.0914844	0.414	0.58625	1	0
ENSMUSG00000048251	Bcl11b	0.00341585	0.00678478	0.388289	0.0646615	0.666	0.4385	0.727183	0.392468
ENSMUSG00000052698	Tln2	0.00342032	0.00308952	0.265248	0.0276311	0.18675	0.05725	1	0
ENSMUSG00000022197	Pdzd2	0.00348991	0.00584911	0.303783	0.0461653	0.5575	0.338	1	0
ENSMUSG00000040420	Cdh18	0.0035065	0.00458947	0.207731	0.112346	0.84625	0.7235	1	0
ENSMUSG00000030302	Atp2b2	0.00357553	0.00231353	0.261048	0.036208	0.8915	0.77625	1	0	SFARI;TADA	0.0229301				2	0
ENSMUSG00000068373	D430041D05Rik	0.00363091	0.00349654	0.213274	0.0401739	0.8175	0.68475	1	0
ENSMUSG00000051166	Eml5	0.00366132	0.00475234	0.273258	0.0431203	0.84625	0.71125	1	0
ENSMUSG00000021301	Hecw1	0.00373306	0.00548251	0.223591	0.0527554	0.678	0.4815	1	0
ENSMUSG00000028565	Nfia	0.00374028	0.00236821	-0.369165	0.0423493	0.80925	0.85675	1	0	SFARI					2	0
ENSMUSG00000026490	Cdc42bpa	0.00383179	0.00224304	-0.295269	0.0167191	0.93425	0.953	1	0
ENSMUSG00000019906	Lin7a	0.00384309	0.00373509	0.221088	0.0381864	0.12725	0.02475	1	0
ENSMUSG00000002625	Akap8l	0.0038437	0.0042831	0.332365	0.094189	0.6845	0.457	0.870876	0.258248
ENSMUSG00000027016	Zfp385b	0.0039046	0.00639115	0.386825	0.0573756	0.93	0.8545	1	0	SFARI					2	0
ENSMUSG00000004110	Cacna1e	0.00392077	0.00628333	0.3131	0.0941658	0.95075	0.8995	1	0	SFARI					1	0
ENSMUSG00000030075	Cntn3	0.00398806	0.00531098	0.215067	0.0807019	0.68025	0.46925	1	0	SFARI					2	0
ENSMUSG00000068696	Gpr88	0.00399318	0.00372793	0.321315	0.0604064	0.21125	0.07575	1	0
ENSMUSG00000069670	Nkain2	0.00400945	0.00377999	0.346777	0.0251259	0.986	0.98175	1	0
ENSMUSG00000061578	Ksr2	0.0040208	0.00683123	0.227042	0.0392726	0.451	0.25025	1	0
ENSMUSG00000097391	Mirg	0.00413042	0.0068009	0.317678	0.0598746	0.46275	0.27875	1	0
ENSMUSG00000040855	Reps2	0.00418571	0.00594628	0.210509	0.023591	0.549	0.338	1	0
ENSMUSG00000005089	Slc1a2	0.00424101	0.00427374	-0.30042	0.0573006	0.959	0.9795	1	0	SFARI						1
ENSMUSG00000003134	Tbc1d8	0.00443931	0.00323633	0.258464	0.0957604	0.195	0.0615	1	0
ENSMUSG00000022108	Itm2b	0.00445259	0.00435247	0.34823	0.0951952	0.84625	0.7155	0.83626	0.327479
ENSMUSG00000042348	Arl15	0.00449806	0.00424343	0.257736	0.0450378	0.883	0.75225	1	0
ENSMUSG00000068205	Macrod2	0.00453744	0.00394065	0.280507	0.0364313	0.992	0.9795	1	0	SFARI					2	0
ENSMUSG00000021198	Unc79	0.00462779	0.00580186	0.33546	0.042486	0.92625	0.88125	1	0	SFARI					2	0
ENSMUSG00000044912	Syt16	0.00475014	0.00826088	0.272509	0.0612733	0.5985	0.37875	0.748313	0.311216
ENSMUSG00000039954	Stk32a	0.00478754	0.0035984	0.235837	0.051382	0.1435	0.037	1	0
ENSMUSG00000052387	Trpm3	0.00486822	0.00622732	-0.435566	0.116829	0.957	0.97525	0.766929	0.466142
ENSMUSG00000070880	Gad1	0.00498794	0.00770841	0.212457	0.0501589	0.18875	0.05525	1	0
ENSMUSG00000106379	Lhfpl3	0.004993	0.00732713	0.397546	0.0980512	0.7295	0.54725	1	0
ENSMUSG00000020173	Cobl	0.0049944	0.00888195	0.250885	0.0473788	0.41775	0.23175	1	0
ENSMUSG00000027624	Epb41l1	0.00500935	0.00343366	0.287413	0.0177836	0.158	0.049	1	0
ENSMUSG00000064329	Scn1a	0.00506505	0.0098673	0.266474	0.0689344	0.65575	0.46325	1	0	SFARI					1	1
ENSMUSG00000072235	Tuba1a	0.00509309	0.00821608	0.413337	0.0539022	0.28075	0.12725	1	0
ENSMUSG00000062078	Qk	0.0051305	0.00497503	-0.386358	0.064577	0.98375	0.996	1	0
ENSMUSG00000020524	Gria1	0.00518464	0.00549777	0.248379	0.0513996	0.928	0.90575	1	0	SFARI					2	0
ENSMUSG00000100826	Snhg14	0.00522982	0.0102914	0.291566	0.0697594	0.971	0.957	0.800777	0.398445
ENSMUSG00000061718	Ppp1r1b	0.00534619	0.00751689	0.327255	0.0569035	0.24375	0.0965	1	0	SFARI					2	0
ENSMUSG00000014361	Mertk	0.00536214	0.00441402	-0.490152	0.0459835	0.57825	0.64975	1	0
ENSMUSG00000058440	Nrf1	0.00537803	0.00842811	-0.48859	0.112628	0.14575	0.30525	0.837121	0.325757
ENSMUSG00000069601	Ank3	0.00541115	0.0101224	0.397208	0.129129	0.9795	0.986	0.81104	0.37792	SFARI;EAGLE		Moderate	7.3	Discordant	1	0
ENSMUSG00000063358	Mapk1	0.00542023	0.00762308	0.322784	0.0661577	0.385	0.207	1	0
ENSMUSG00000025920	Stau2	0.00550938	0.00650359	0.223681	0.07249	0.64125	0.461	1	0
ENSMUSG00000070866	Zfp804a	0.00551254	0.00588404	0.23042	0.0924647	0.72125	0.547	1	0	SFARI					2	0
ENSMUSG00000058740	Kcnt1	0.0055952	0.00236103	0.254671	0.0145056	0.18225	0.0655	1	0
ENSMUSG00000092341	Malat1	0.00560635	0.00821563	-0.191717	0.0422697	1	1	1	0
ENSMUSG00000043857	Mgat5b	0.00560827	0.00502538	0.189337	0.0255807	0.12525	0.02675	1	0
ENSMUSG00000029467	Atp2a2	0.00574112	0.00627414	0.355984	0.0948584	0.619	0.4365	1	0
ENSMUSG00000025138	Sirt7	0.00581082	0.00676666	0.168639	0.0505408	0.164	0.041	1	0
ENSMUSG00000026576	Atp1b1	0.00588705	0.00273299	0.262803	0.0174483	0.8175	0.6805	1	0
ENSMUSG00000029088	Kcnip4	0.00589328	0.00653146	0.488662	0.205757	0.97525	0.969	0.93978	0.120441
ENSMUSG00000047495	Dlgap2	0.00590648	0.0112052	0.239868	0.0708885	0.971	0.949	0.93006	0.13988	SFARI;EAGLE		Limited	2.8	Discordant	2	0
ENSMUSG00000019831	Wasf1	0.00602362	0.01117	0.258305	0.0487354	0.58825	0.36275	1	0	SFARI						1
ENSMUSG00000041216	Clvs1	0.00614473	0.0106691	0.242894	0.056323	0.63925	0.4345	1	0
ENSMUSG00000040407	Akap9	0.00618184	0.00623161	0.254037	0.0564651	0.6865	0.461	1	0	SFARI					2	0
ENSMUSG00000019505	Ubb	0.00622331	0.00571223	0.428777	0.0575353	0.34425	0.18675	1	0
ENSMUSG00000059146	Ntrk3	0.00625459	0.00468143	0.297308	0.0655551	0.95275	0.87675	1	0	SFARI					2	0
ENSMUSG00000053825	Ppfia2	0.00629292	0.00569602	0.127624	0.0393533	0.875	0.746	1	0
ENSMUSG00000038576	Susd4	0.00634644	0.00581056	0.206407	0.0482513	0.1355	0.033	1	0
ENSMUSG00000020340	Cyfip2	0.00645462	0.0127028	0.311079	0.0781922	0.30725	0.125	0.816162	0.367676
ENSMUSG00000034187	Nsf	0.00649541	0.00845931	0.178068	0.0685854	0.77475	0.55525	1	0
ENSMUSG00000052837	Junb	0.00650708	0.00650441	0.164442	0.0315436	0.117	0.0225	1	0
ENSMUSG00000042807	Hecw2	0.00650974	0.00686373	0.223228	0.0540984	0.92625	0.84625	1	0	SFARI					2	0
ENSMUSG00000037563	Rps16	0.00654404	0.00545654	0.235553	0.0615272	0.17425	0.05525	1	0
ENSMUSG00000050447	Lypd6	0.00668729	0.00415214	-0.319026	0.0314108	0.15175	0.295	1	0
ENSMUSG00000014956	Ppp1cb	0.00674308	0.00697604	0.212679	0.0536826	0.20075	0.072	1	0
ENSMUSG00000038718	Pbx3	0.00701663	0.0102282	0.291315	0.0456366	0.871	0.7355	1	0
ENSMUSG00000030102	Itpr1	0.00703387	0.0113448	0.417307	0.14696	0.951	0.86275	0.575425	0.490998	SFARI					2	0
ENSMUSG00000062991	Nrg1	0.0070995	0.0128517	0.397933	0.194216	0.9795	0.961	1	0
ENSMUSG00000067567	Hdac8	0.00727629	0.00464357	-0.397429	0.0498698	0.504	0.664	1	0	SFARI						1
ENSMUSG00000020189	Osbpl8	0.0074359	0.0141606	0.327983	0.0645486	0.8955	0.797	1	0
ENSMUSG00000041540	Sox5	0.00749623	0.011548	-0.50364	0.119444	0.51625	0.662	1	0	SFARI;EAGLE;TADA	0.061273	Definitive	17.6	Concordant	1	1
ENSMUSG00000044667	Plppr4	0.00752088	0.00830413	0.277059	0.0699563	0.705	0.52425	1	0
ENSMUSG00000048644	Ctxn1	0.00752612	0.00507297	0.167906	0.0163499	0.13925	0.039	1	0
ENSMUSG00000044033	Ccdc141	0.00761704	0.00428211	-0.205857	0.0124657	0.11675	0.25	1	0
ENSMUSG00000054728	Phactr1	0.00777421	0.0129904	0.792278	0.110479	0.9815	0.996	1	0
ENSMUSG00000047126	Cltc	0.00790564	0.0114629	0.295181	0.0289051	0.67825	0.47125	1	0
ENSMUSG00000000948	Gm38393	0.00801774	0.0102105	0.273163	0.0465453	0.19075	0.06775	1	0
ENSMUSG00000037386	Rims2	0.0080708	0.0120982	0.313761	0.0938966	0.992	0.98175	1	0	SFARI					3	1
ENSMUSG00000022099	Dmtn	0.008108	0.00969551	0.215081	0.017011	0.13525	0.03275	1	0
ENSMUSG00000039488	Cntn5	0.00819699	0.0157958	0.350483	0.0931162	0.94475	0.9405	1	0	SFARI					2	0
ENSMUSG00000036438	Calm2	0.00823157	0.0133451	0.225996	0.0813189	0.832	0.6375	1	0
ENSMUSG00000036264	Fstl4	0.00835537	0.0135811	0.209723	0.0409204	0.26425	0.111	1	0
ENSMUSG00000066392	Nrxn3	0.00839307	0.00915352	0.309845	0.154476	1	0.973	1	0	SFARI;EAGLE		Moderate	11.1	Discordant	1	0
ENSMUSG00000016200	Syt14	0.00840051	0.00710816	0.268538	0.109036	0.46925	0.27675	0.836383	0.327233
ENSMUSG00000027799	Nbea	0.00841224	0.00631739	0.180277	0.0490489	0.984	0.994	1	0	SFARI					1	1
ENSMUSG00000001175	Calm1	0.00845702	0.00403142	0.356375	0.0308945	0.5245	0.342	1	0
ENSMUSG00000034730	Adgrb1	0.00881037	0.00425377	0.279032	0.0155582	0.26225	0.12725	1	0
ENSMUSG00000042700	Sipa1l1	0.00899552	0.00556704	0.226095	0.0834496	0.963	0.88925	1	0
ENSMUSG00000031818	Cox4i1	0.0090253	0.0148509	0.434652	0.150485	0.32175	0.1455	0.770387	0.459226
ENSMUSG00000034066	Farp2	0.00911875	0.011804	-0.243431	0.0367222	0.05125	0.16825	1	0
ENSMUSG00000051586	Mical3	0.00933212	0.0135249	0.212118	0.0475214	0.424	0.248	1	0
ENSMUSG00000037624	Kcnk2	0.00935526	0.0111413	0.424854	0.0576523	0.332	0.1845	1	0
ENSMUSG00000032946	Rasgrp2	0.00939824	0.00905997	0.222598	0.0467696	0.14125	0.039	1	0
ENSMUSG00000052372	Il1rapl1	0.00944373	0.014863	0.38961	0.0775422	0.996	0.984	1	0	SFARI					2	0
ENSMUSG00000019775	Rgs17	0.00952219	0.0101977	0.16153	0.0156305	0.16	0.049	1	0
ENSMUSG00000031425	Plp1	0.00964456	0.0145017	0.186281	0.191097	0.52875	0.342	1	0
ENSMUSG00000030884	Uqcrc2	0.00979164	0.012216	0.18921	0.0300757	0.14125	0.03925	1	0
ENSMUSG00000031841	Cdh13	0.00985003	0.011399	0.257235	0.0929777	0.55325	0.36475	1	0	SFARI					2	0
ENSMUSG00000046182	Gsg1l	0.0099318	0.00720668	0.209254	0.011721	0.1865	0.0715	1	0
ENSMUSG00000037679	Inf2	0.0100135	0.0124426	0.345545	0.0284256	0.248	0.115	1	0
ENSMUSG00000029093	Sorcs2	0.0100463	0.00145844	0.280321	0.00684806	0.28275	0.1435	1	0
ENSMUSG00000032966	Fkbp1a	0.0102045	0.00639277	0.200395	0.0372293	0.17425	0.06375	1	0
ENSMUSG00000010086	Rnf112	0.0102658	0.0157133	0.245915	0.0481088	0.1845	0.0655	1	0
ENSMUSG00000029211	Gabra4	0.0103019	0.00811389	0.150504	0.0157787	0.586	0.381	1	0	SFARI					2	0
ENSMUSG00000033060	Lmo7	0.0103816	0.00620302	0.201898	0.0444266	0.32175	0.172	1	0
ENSMUSG00000035517	Tdrd7	0.0104099	0.00846939	0.178909	0.0339549	0.14975	0.045	1	0
ENSMUSG00000034994	Eef2	0.0104644	0.0183233	0.272868	0.0781006	0.18275	0.0595	1	0
ENSMUSG00000029763	Exoc4	0.0106251	0.0175252	-0.342824	0.133883	0.9265	0.9345	1	0
ENSMUSG00000035790	Cep19	0.0106561	0.00912516	0.166982	0.0305214	0.113	0.027	1	0
ENSMUSG00000054226	Tprkb	0.0107217	0.00775687	-0.299936	0.0870103	0.18675	0.3275	1	0
ENSMUSG00000025370	Cdh9	0.0108919	0.0131449	0.278922	0.106991	0.3155	0.15975	1	0	SFARI					2	0
ENSMUSG00000027605	Acss2	0.011	0.015782	-0.286843	0.0480784	0.1065	0.23975	1	0
ENSMUSG00000024083	Pja2	0.0110422	0.0095847	0.224556	0.0120542	0.60675	0.40975	1	0
ENSMUSG00000021665	Hexb	0.0110696	0.00868903	0.179966	0.0833156	0.2315	0.1025	1	0
ENSMUSG00000037224	Zfyve28	0.0111412	0.00495787	0.201124	0.0423681	0.15375	0.05325	1	0
ENSMUSG00000030890	Ilk	0.0111533	0.00999844	0.127823	0.0298922	0.14975	0.045	1	0
ENSMUSG00000020598	Nrcam	0.0111657	0.0154706	-0.348431	0.0771234	0.9345	0.9405	1	0	SFARI					2	0
ENSMUSG00000030795	Fus	0.0115845	0.00434868	0.227762	0.0515537	0.6765	0.50625	1	0
ENSMUSG00000070498	Tmem132b	0.0116333	0.00821724	0.148005	0.0252178	0.7765	0.631	1	0
ENSMUSG00000028649	Macf1	0.011674	0.0154698	-0.33427	0.0507239	0.99	1	1	0
ENSMUSG00000050315	Synpo2	0.011772	0.00720231	0.189685	0.0429175	0.1455	0.045	1	0
ENSMUSG00000021068	Nin	0.0118458	0.017947	0.190016	0.0313364	0.47975	0.293	1	0
ENSMUSG00000020122	Egfr	0.011892	0.0144136	-0.344073	0.208438	0.1845	0.338	1	0
ENSMUSG00000017412	Cacnb4	0.0121331	0.0157597	0.190337	0.0453238	0.92625	0.8665	1	0
ENSMUSG00000054976	Nyap2	0.012211	0.0171774	0.101045	0.0519912	0.373	0.213	1	0
ENSMUSG00000030432	Rpl28	0.0122984	0.00996434	0.23085	0.0511432	0.19875	0.08	1	0
ENSMUSG00000042453	Reln	0.0123611	0.00850236	0.14724	0.0170137	0.15975	0.05325	1	0	SFARI;EAGLE		Disputed	7.2; contradictory evidence	Discordant	1	0
ENSMUSG00000049336	Tenm2	0.0126272	0.0240452	0.32636	0.0945603	0.94875	0.94675	1	0
ENSMUSG00000097736	9530059O14Rik	0.0127245	0.00370826	0.191957	0.0188314	0.80725	0.69275	1	0
ENSMUSG00000025314	Ptprj	0.012733	0.0164554	0.202967	0.0628224	0.4325	0.262	1	0
ENSMUSG00000028782	Adgrb2	0.0127948	0.0106746	0.203126	0.009979	0.20325	0.084	1	0
ENSMUSG00000026082	Rev1	0.0127974	0.00785926	0.154836	0.0591518	0.48975	0.29075	1	0
ENSMUSG00000029757	Dync1i1	0.0129058	0.0201194	0.156867	0.0460229	0.422	0.25225	1	0
ENSMUSG00000032740	Ccdc88a	0.0129066	0.023166	-0.391132	0.10383	0.93225	0.93875	1	0
ENSMUSG00000047747	Rnf150	0.0129549	0.00610591	0.175941	0.0389145	0.7275	0.58625	1	0
ENSMUSG00000021288	Klc1	0.0129929	0.00121036	0.272031	0.0307557	0.2295	0.111	1	0
ENSMUSG00000030092	Cntn6	0.0130037	0.0080271	0.162222	0.0350338	0.1335	0.041	1	0	SFARI					2	0
ENSMUSG00000025555	Farp1	0.0131741	0.00538275	-0.311315	0.0516198	0.63725	0.746	1	0
ENSMUSG00000005871	Apc	0.0132298	0.0120042	-0.327811	0.055939	0.8155	0.85025	1	0
ENSMUSG00000074968	Ano3	0.0134803	0.00815983	0.255865	0.0383899	0.84825	0.75225	1	0
ENSMUSG00000024639	Gnaq	0.013513	0.00965276	-0.320476	0.0503037	0.82775	0.85875	1	0
ENSMUSG00000019432	Ddx39b	0.0135226	0.0220433	0.236564	0.0536229	0.1885	0.06775	1	0
ENSMUSG00000045658	Pid1	0.0136592	0.0104865	-0.417646	0.0364973	0.27425	0.416	1	0
ENSMUSG00000046330	Rpl37a	0.0139159	0.0095079	0.225745	0.0471876	0.21325	0.094	1	0
ENSMUSG00000027309	Dnaaf9	0.0139643	0.00818422	-0.316334	0.043186	0.8215	0.85025	1	0
ENSMUSG00000062270	Morf4l1	0.0139776	0.0120583	0.195816	0.0646155	0.2645	0.125	1	0
ENSMUSG00000002416	Ndufb2	0.0140778	0.00881451	0.147694	0.0277801	0.111	0.029	1	0
ENSMUSG00000038128	Camk4	0.0142715	0.011287	0.201162	0.0278674	0.848	0.76825	1	0	SFARI					2	0
ENSMUSG00000028410	Dnaja1	0.0147674	0.0200437	0.239509	0.0351741	0.14125	0.045	1	0
ENSMUSG00000039578	Ccser1	0.0147946	0.0172436	0.193771	0.0792818	0.97525	0.973	1	0	SFARI					2	0
ENSMUSG00000024012	Mtch1	0.0148052	0.011414	0.254191	0.0417976	0.16825	0.06575	1	0
ENSMUSG00000020321	Mdh1	0.0153303	0.0158681	0.314124	0.0418267	0.25225	0.11875	1	0
ENSMUSG00000067242	Lgi1	0.015337	0.0133344	0.220553	0.0650311	0.1805	0.0715	1	0
ENSMUSG00000036306	Lzts1	0.0153924	0.0280101	0.140257	0.0555573	0.1395	0.031	1	0
ENSMUSG00000055540	Epha6	0.0154085	0.0111766	0.129442	0.0465987	0.924	0.84425	1	0
ENSMUSG00000098760	Gm2164	0.0155674	0.0159249	0.166406	0.0401776	0.15775	0.05125	1	0
ENSMUSG00000086370	Ftx	0.0156056	0.0136408	0.168757	0.0478777	0.498	0.3115	1	0
ENSMUSG00000046432	Bex3	0.0157427	0.0237756	0.142574	0.0409113	0.133	0.035	1	0
ENSMUSG00000018501	Ncor1	0.0158886	0.0177596	-0.286387	0.0575995	0.82375	0.86675	1	0	SFARI					2	0
ENSMUSG00000057666	Gapdh	0.0159385	0.0205493	0.330109	0.0661074	0.453	0.28875	1	0
ENSMUSG00000045608	Dbx2	0.016007	0.0135499	-0.152287	0.0213334	0.086	0.199	1	0
ENSMUSG00000051527	Usp29	0.0161567	0.0314172	0.252765	0.103396	0.46325	0.2665	1	0
ENSMUSG00000037110	Ralgapa2	0.016206	0.0183056	0.182516	0.0645331	0.574	0.36075	1	0
ENSMUSG00000039375	Wdr17	0.0162393	0.0146662	-0.309343	0.112051	0.98125	0.973	1	0
ENSMUSG00000053199	Arhgap20	0.0163658	0.0119148	0.216695	0.0292593	0.1395	0.04525	1	0
ENSMUSG00000021313	Ryr2	0.0165286	0.00753728	0.0621256	0.0340192	0.873	0.7765	1	0
ENSMUSG00000061032	Rrp1	0.0166239	0.0124479	0.176463	0.0466722	0.131	0.041	1	0
ENSMUSG00000025499	Hras	0.0167705	0.0137718	0.18113	0.0398018	0.15175	0.053	1	0	SFARI					1	0
ENSMUSG00000002006	Pdzd4	0.0168555	0.0144667	0.163737	0.0371596	0.125	0.037	1	0
ENSMUSG00000005360	Slc1a3	0.0168846	0.0317224	-0.336011	0.124014	0.836	0.873	1	0
ENSMUSG00000022946	Dop1b	0.0170078	0.0137122	0.266652	0.03785	0.158	0.05925	1	0
ENSMUSG00000090386	Mir99ahg	0.0172229	0.0074904	-0.299043	0.0210419	1	1	1	0
ENSMUSG00000009569	Mrtfb	0.0172576	0.0275266	0.198996	0.0575967	0.8485	0.73175	1	0	SFARI					2	0
ENSMUSG00000022105	Rb1	0.0173163	0.0314095	-0.445244	0.076285	0.3545	0.48975	1	0
ENSMUSG00000028785	Hpca	0.0173464	0.0127348	0.196494	0.0449995	0.17625	0.07	1	0
ENSMUSG00000064061	Dzip3	0.0175131	0.0201893	0.194741	0.0379666	0.50625	0.3215	1	0
ENSMUSG00000040276	Pacsin1	0.0176037	0.0189426	0.172126	0.0638284	0.4265	0.26025	1	0
ENSMUSG00000021259	Cyp46a1	0.0176514	0.0212471	0.225761	0.0431293	0.1865	0.07575	1	0
ENSMUSG00000055109	Gm15155	0.0179613	0.0314268	0.299208	0.0454991	0.27675	0.131	1	0	SFARI;EAGLE		Definitive	17.6	Discordant	2	0
ENSMUSG00000021929	Kpna3	0.0182186	0.00489271	0.185227	0.0108508	0.1845	0.08	1	0
ENSMUSG00000027803	Wwtr1	0.018232	0.0173283	-0.171707	0.0340154	0.11875	0.244	1	0
ENSMUSG00000090841	Myl6	0.0182639	0.0196566	0.21799	0.0517543	0.20725	0.084	1	0
ENSMUSG00000021983	Atp8a2	0.0183848	0.0150859	0.165577	0.0266474	0.307	0.17025	1	0
ENSMUSG00000033419	Snap91	0.0184037	0.0326933	0.188339	0.0488913	0.51225	0.31975	1	0
ENSMUSG00000071054	Safb	0.0184812	0.00621715	0.179532	0.00432428	0.2195	0.1005	1	0
ENSMUSG00000036800	Fam135b	0.018575	0.031272	0.163995	0.0613602	0.54725	0.3565	1	0
ENSMUSG00000018417	Myo1b	0.0186409	0.0145551	0.250179	0.0322407	0.1495	0.05525	1	0
ENSMUSG00000064293	Cntn4	0.0186609	0.033813	0.271203	0.0854293	0.94275	0.922	1	0	SFARI					2	0
ENSMUSG00000063887	Nlgn1	0.0186954	0.0145513	0.355046	0.039073	1	1	1	0	SFARI					2	0
ENSMUSG00000030647	Ndufc2	0.0187621	0.013734	0.266235	0.0639124	0.211	0.09875	1	0
ENSMUSG00000003970	Rpl8	0.0187945	0.0242483	0.227117	0.0585944	0.15975	0.053	1	0
ENSMUSG00000046709	Mapk10	0.0188988	0.0134926	-0.308683	0.030105	0.88525	0.93625	1	0
ENSMUSG00000055761	Nkain3	0.0191417	0.0322161	0.220504	0.060273	0.45675	0.2845	1	0
ENSMUSG00000027303	Ptpra	0.0193864	0.015881	-0.377091	0.0529072	0.23775	0.36275	1	0
ENSMUSG00000027692	Tnik	0.0194215	0.0288163	-0.28193	0.12282	0.98375	1	0.958675	0.0826508
ENSMUSG00000060429	Sntb1	0.0195213	0.0317038	-0.14382	0.0327901	0.05525	0.16	1	0
ENSMUSG00000039153	Runx2	0.0196753	0.0227033	0.149382	0.0361498	0.119	0.033	1	0
ENSMUSG00000032826	Ank2	0.0198368	0.0203761	-0.274115	0.0649115	0.998	1	1	0	SFARI;EAGLE;TADA	0.00174365	Moderate	10.8	Discordant	1	0
ENSMUSG00000027933	Ints3	0.0198808	0.0185432	0.276157	0.0513081	0.1475	0.055	1	0
ENSMUSG00000056073	Grik2	0.0199232	0.018901	0.382141	0.0671639	0.996	0.97725	1	0	SFARI					2	0
ENSMUSG00000033577	Myo6	0.0200779	0.0102871	-0.328772	0.0530574	0.4855	0.57775	1	0
ENSMUSG00000054871	Tmem158	0.0200819	0.00643924	0.167083	0.0136226	0.1455	0.05525	1	0
ENSMUSG00000026764	Kif5c	0.0203345	0.0151906	0.212039	0.0365667	0.158	0.0635	1	0	SFARI;TADA	0.017695				2	1
ENSMUSG00000032827	Ppp1r9a	0.0203447	0.0181449	0.184883	0.0687269	0.97525	0.8645	1	0
ENSMUSG00000042846	Lrrtm3	0.020423	0.0158759	0.209085	0.031606	0.90575	0.84825	1	0
ENSMUSG00000058318	Phf21a	0.0204891	0.0133028	-0.343341	0.0638742	0.86675	0.86675	1	0	SFARI;EAGLE;TADA	0.00022532	Limited	5.35	Discordant	1	1
ENSMUSG00000063434	Sorcs3	0.0205294	0.0232428	0.130379	0.0472043	0.51025	0.3255	1	0	SFARI					2	0
ENSMUSG00000041966	Dcaf17	0.0211438	0.0158621	0.24196	0.0337553	0.15375	0.0615	1	0
ENSMUSG00000019943	Atp2b1	0.0211473	0.0415367	0.555515	0.0861087	0.9815	0.973	1	0	SFARI					3	0
ENSMUSG00000027296	Itpka	0.0211713	0.0174177	0.204982	0.0380539	0.12525	0.041	1	0
ENSMUSG00000021767	Kat6b	0.0211825	0.0243179	0.177305	0.0714432	0.77475	0.57975	1	0	SFARI					3	0
ENSMUSG00000045967	Gpr158	0.0212377	0.0353676	0.253668	0.040901	0.94475	0.93025	1	0
ENSMUSG00000089809	Rasgef1b	0.021303	0.0349263	0.232649	0.0522439	0.799	0.67625	1	0
ENSMUSG00000049878	Rlf	0.0213182	0.00783247	0.20682	0.0159258	0.14975	0.05725	1	0
ENSMUSG00000071753	Cdr1os	0.0213924	0.027343	0.21402	0.0636356	0.8095	0.707	1	0
ENSMUSG00000038296	Galnt18	0.0214169	0.00753082	0.14192	0.0126046	0.55125	0.3645	1	0
ENSMUSG00000063646	Jakmip1	0.0215011	0.0126724	0.145756	0.0273251	0.121	0.039	1	0
ENSMUSG00000020354	Sgcd	0.0216978	0.0233573	0.191482	0.0782999	0.74975	0.621	1	0
ENSMUSG00000026860	Sh3glb2	0.0217294	0.0119936	0.137085	0.0243029	0.13125	0.045	1	0
ENSMUSG00000034799	Unc13a	0.0217838	0.0237669	0.20968	0.0485485	0.13925	0.045	1	0	SFARI					2	1
ENSMUSG00000022843	Clcn2	0.0222799	0.00641019	0.142266	0.0100483	0.13725	0.049	1	0
ENSMUSG00000044471	Lncpint	0.0222864	0.01851	-0.261021	0.0381447	0.96725	0.99	1	0
ENSMUSG00000004798	Ulk2	0.0223038	0.0290707	0.238908	0.0601496	0.26025	0.12525	1	0
ENSMUSG00000039716	Dock3	0.0223075	0.0198435	0.197974	0.0733797	0.97525	0.93625	1	0
ENSMUSG00000026959	Grin1	0.0223416	0.0303457	0.247056	0.0307554	0.81325	0.705	1	0	SFARI					1	0
ENSMUSG00000055421	Pcdh9	0.0224328	0.0224048	-0.226464	0.0676403	1	1	1	0	SFARI					2	0
ENSMUSG00000044647	Csrnp3	0.0225803	0.0112182	0.208688	0.0302084	0.80125	0.71525	1	0
ENSMUSG00000031292	Cdkl5	0.0228557	0.0364247	0.130801	0.0870942	0.7685	0.619	1	0	SFARI					1	1
ENSMUSG00000025468	Caly	0.0229412	0.0331247	0.153417	0.043701	0.13525	0.043	1	0
ENSMUSG00000040048	Ndufb10	0.0230607	0.0316728	0.17434	0.0399709	0.1765	0.06975	1	0
ENSMUSG00000044071	Tafa2	0.0230935	0.0290911	0.155347	0.0198709	0.34625	0.201	1	0
ENSMUSG00000025738	Fbxl16	0.0231002	0.0315842	0.146923	0.0316124	0.13325	0.041	1	0
ENSMUSG00000048332	Lhfp	0.0233113	0.0315421	-0.388367	0.0956194	0.19275	0.334	1	0
ENSMUSG00000102252	Snrpn	0.0233616	0.0121233	0.24401	0.0461231	0.21325	0.10475	1	0
ENSMUSG00000069769	Msi2	0.0239056	0.0143176	-0.216291	0.0602992	0.8995	0.92	1	0
ENSMUSG00000021374	Nup153	0.0239656	0.0383095	0.232004	0.063264	0.17225	0.0635	1	0
ENSMUSG00000005417	Mprip	0.0240126	0.0160966	0.232968	0.0265887	0.23375	0.12075	1	0
ENSMUSG00000008575	Nfib	0.0240146	0.0356908	-0.356743	0.0973647	0.7415	0.81525	1	0	SFARI					2	1
ENSMUSG00000028906	Epb41	0.0241195	0.0222315	0.154173	0.0987827	0.199	0.086	1	0
ENSMUSG00000020402	Vdac1	0.0241908	0.0159443	0.181505	0.0250961	0.1435	0.055	1	0
ENSMUSG00000022283	Pabpc1	0.0242355	0.0279863	0.251856	0.0496212	0.201	0.09425	1	0	SFARI					3	0
ENSMUSG00000032294	Pkm	0.0243485	0.0209857	0.171108	0.0131136	0.17625	0.074	1	0
ENSMUSG00000041272	Tox	0.0243551	0.0181432	-0.352432	0.123561	0.27675	0.43	1	0
ENSMUSG00000035674	Ndufa3	0.0245154	0.0169624	0.128138	0.0304431	0.131	0.045	1	0
ENSMUSG00000023809	Rps6ka2	0.0245856	0.0249893	0.216759	0.0343714	0.13125	0.04525	1	0	SFARI					2	0
ENSMUSG00000063568	Jazf1	0.024703	0.0361835	0.217411	0.054747	0.422	0.26625	1	0
ENSMUSG00000055024	Ep300	0.0248662	0.0141668	0.269685	0.0223396	0.301	0.16825	1	0	SFARI					1	1
ENSMUSG00000007653	Gabrb2	0.025055	0.0204387	0.14902	0.0489898	0.744	0.60275	1	0	SFARI;EAGLE		Limited	0.3	Discordant	1	0
ENSMUSG00000047036	Zfp445	0.0250729	0.0153445	0.231895	0.0521481	0.248	0.12925	1	0
ENSMUSG00000034135	Sik3	0.0251555	0.0393527	-0.310798	0.0567848	0.95275	0.957	1	0
ENSMUSG00000040415	Dtx3	0.0252114	0.0203546	0.244957	0.0269854	0.30325	0.16825	1	0
ENSMUSG00000027797	Dclk1	0.0254026	0.0306963	-0.374661	0.117598	0.992	0.988	1	0
ENSMUSG00000028351	Brinp1	0.0254173	0.0323366	0.185535	0.0377856	0.85675	0.77025	1	0
ENSMUSG00000118099	Gm31356	0.0254712	0.0141715	-0.108893	0.0311568	0.19075	0.33	1	0
ENSMUSG00000029359	Tesc	0.0258226	0.0428668	0.175678	0.0595527	0.162	0.05525	1	0
ENSMUSG00000005882	Uqcc1	0.0260115	0.0226297	-0.223545	0.0410203	0.05925	0.14975	1	0
ENSMUSG00000064043	Trerf1	0.0263837	0.0334395	0.201034	0.0849039	0.7765	0.588	1	0
ENSMUSG00000027347	Rasgrp1	0.0264787	0.0312276	0.253179	0.0456512	0.19075	0.082	1	0
ENSMUSG00000025283	Sat1	0.0266319	0.0256866	-0.231871	0.0841411	0.33375	0.49375	1	0
ENSMUSG00000112967	4930428E07Rik	0.0266694	0.0321101	0.169339	0.0241473	0.16375	0.06575	1	0
ENSMUSG00000036006	Ripor2	0.0266717	0.0139563	0.155658	0.0220351	0.156	0.06375	1	0
ENSMUSG00000061410	Zcchc14	0.0268341	0.0415242	0.233535	0.0489169	0.13925	0.039	1	0
ENSMUSG00000052889	Prkcb	0.0269204	0.0529212	0.378592	0.0906483	0.95075	0.90575	1	0	SFARI					2	0
ENSMUSG00000103428	Gm20754	0.0269281	0.00586629	0.129339	0.0329172	0.168	0.072	1	0
ENSMUSG00000009681	Bcr	0.0269733	0.0174671	0.22166	0.0434847	0.199	0.092	1	0
ENSMUSG00000052727	Map1b	0.0269861	0.0310135	0.176302	0.0617497	0.752	0.5945	1	0
ENSMUSG00000118664	Tusc3	0.0270333	0.0368809	0.214241	0.0585485	0.7665	0.6045	1	0
ENSMUSG00000053141	Ptprt	0.0270708	0.0186829	-0.2167	0.0472064	0.955	0.97975	1	0	SFARI					2	0
ENSMUSG00000021596	Mctp1	0.0271128	0.0218089	0.220676	0.0562407	0.90975	0.8625	1	0
ENSMUSG00000026834	Acvr1c	0.0273815	0.0309538	0.169998	0.067246	0.1375	0.039	1	0
ENSMUSG00000060275	Nrg2	0.0273853	0.0521116	0.271473	0.0654848	0.5125	0.33	1	0
ENSMUSG00000034484	Snx2	0.0274812	0.0247606	0.146354	0.0514604	0.16575	0.0655	1	0
ENSMUSG00000030209	Grin2b	0.0275703	0.0379229	0.209388	0.120597	0.97325	0.9755	1	0	SFARI;EAGLE;TADA	2.49e-09	Definitive	29.65	Concordant	1	0
ENSMUSG00000022829	Stxbp5l	0.0276083	0.0245271	0.201092	0.12636	0.92425	0.904	1	0
ENSMUSG00000029348	Asphd2	0.0280273	0.0153752	0.149515	0.0252663	0.123	0.043	1	0
ENSMUSG00000031865	Dctn1	0.0284827	0.0283838	0.208339	0.0914538	0.242	0.117	1	0
ENSMUSG00000094707	A830019P07Rik	0.0285074	0.0515214	-0.163532	0.0423132	0.06775	0.1865	1	0
ENSMUSG00000027254	Map1a	0.0285564	0.013953	0.0861209	0.0194852	0.119	0.039	1	0	SFARI;EAGLE;TADA	0.00686837	No scorable evidence	0	Discordant	1	0
ENSMUSG00000031626	Sorbs2	0.0286772	0.0191975	0.181363	0.0276616	0.94675	0.89125	1	0
ENSMUSG00000039943	Plcb4	0.0288438	0.0277523	-0.392779	0.104063	0.14975	0.2625	1	0
ENSMUSG00000097156	Gm3764	0.0288634	0.0518859	-0.28605	0.180462	0.7215	0.85425	1	0
ENSMUSG00000068151	A230006K03Rik	0.029251	0.0143707	0.162445	0.030868	0.83	0.75225	1	0
ENSMUSG00000046230	Vps13a	0.0299381	0.0405664	0.166601	0.0728237	0.77025	0.58225	1	0
ENSMUSG00000034912	Mdga2	0.0304252	0.0211692	-0.239452	0.0413772	1	1	1	0	SFARI					2	0
ENSMUSG00000051951	Xkr4	0.0305407	0.0258697	0.141686	0.0734102	0.9385	0.91	1	0
ENSMUSG00000029471	Camkk2	0.0310296	0.0202789	0.134856	0.0210164	0.1435	0.05525	1	0
ENSMUSG00000026585	Kifap3	0.0310836	0.0273531	0.224902	0.0565535	0.7255	0.5535	1	0
ENSMUSG00000021910	Nisch	0.0313479	0.0182949	0.250458	0.0602463	0.46525	0.31775	1	0
ENSMUSG00000032212	Sltm	0.0314388	0.0246479	0.229653	0.0559654	0.703	0.537	1	0
ENSMUSG00000070695	Cntnap5a	0.0315838	0.0209337	0.207999	0.0605406	0.69675	0.56125	1	0
ENSMUSG00000058656	Samd12	0.0316242	0.0302393	0.116825	0.0691384	0.8975	0.80325	1	0
ENSMUSG00000024502	Jakmip2	0.0317572	0.0245777	0.187275	0.0498687	0.56375	0.3995	1	0
ENSMUSG00000038884	Shfl	0.0318411	0.0311872	0.153708	0.0251622	0.111	0.03275	1	0
ENSMUSG00000013465	Nelfb	0.0320915	0.0258475	0.141931	0.0234436	0.115	0.03675	1	0
ENSMUSG00000049422	Chchd10	0.0323111	0.0436848	0.35876	0.10197	0.24175	0.123	1	0
ENSMUSG00000027951	Adar	0.032409	0.00687973	0.186955	0.0509845	0.168	0.076	1	0
ENSMUSG00000025630	Hprt	0.0325418	0.0384898	0.178789	0.0450253	0.14125	0.05125	1	0
ENSMUSG00000026878	Rab14	0.0329423	0.026377	0.186073	0.078422	0.27225	0.1495	1	0
ENSMUSG00000024544	Ldlrad4	0.0333177	0.0378012	0.190368	0.0604413	0.88325	0.80125	1	0
ENSMUSG00000038014	Fam120a	0.0339543	0.0280693	0.237249	0.0573534	0.209	0.1045	1	0
ENSMUSG00000018425	Dhx40	0.0339723	0.0410714	0.238474	0.0557593	0.17625	0.078	1	0
ENSMUSG00000039913	Pak5	0.0339839	0.0347292	0.12651	0.0524539	0.69475	0.5555	1	0
ENSMUSG00000052812	Atad2b	0.0339843	0.0366395	-0.337495	0.0366308	0.242	0.3645	1	0
ENSMUSG00000023960	Enpp5	0.0341136	0.028088	0.178829	0.0570329	0.13725	0.051	1	0
ENSMUSG00000002222	Rmnd5a	0.0341831	0.0267172	0.217841	0.0380479	0.19275	0.09225	1	0
ENSMUSG00000031284	Pak3	0.0343184	0.0562035	0.224241	0.0259089	0.625	0.457	1	0
ENSMUSG00000030621	Me3	0.0343436	0.0657341	0.195156	0.0864626	0.623	0.43025	1	0
ENSMUSG00000035969	Rusc2	0.0345534	0.0321813	0.141887	0.0516578	0.115	0.03275	1	0
ENSMUSG00000034731	Dgkh	0.0346424	0.0681579	0.227912	0.0942934	0.6495	0.455	1	0
ENSMUSG00000017692	Rhbdl3	0.034825	0.0420828	0.18721	0.0334434	0.119	0.041	1	0
ENSMUSG00000021719	Rgs7bp	0.0348354	0.0381879	0.210988	0.0508639	0.8155	0.7315	1	0
ENSMUSG00000017740	Slc12a5	0.0348946	0.0459996	0.119356	0.0507298	0.1535	0.0595	1	0	SFARI					2	0
ENSMUSG00000038094	Atp13a4	0.0350213	0.054871	-0.163932	0.049414	0.1045	0.21725	1	0
ENSMUSG00000091476	Catspere2	0.0350407	0.00999809	0.229483	0.0360348	0.18675	0.0925	1	0
ENSMUSG00000045083	Lingo2	0.0351723	0.0231548	0.396945	0.101283	0.86475	0.87075	1	0
ENSMUSG00000029223	Uchl1	0.0352121	0.0328282	0.160839	0.0361075	0.14975	0.0595	1	0
ENSMUSG00000075415	Fnbp1	0.0353572	0.0361364	-0.420979	0.0840633	0.36675	0.48175	1	0
ENSMUSG00000061762	Tac1	0.035397	0.0452281	0.328333	0.0769185	0.1375	0.051	1	0
ENSMUSG00000020163	Uqcr11	0.0354493	0.0609019	0.173481	0.0467091	0.162	0.0595	1	0
ENSMUSG00000024500	Ppp2r2b	0.0356564	0.0219962	-0.258287	0.047104	0.93225	0.967	1	0
ENSMUSG00000035305	Ror1	0.0356974	0.0498865	0.172188	0.0488865	0.1375	0.049	1	0
ENSMUSG00000025911	Adhfe1	0.0357364	0.0548271	-0.14009	0.0360027	0.088	0.19875	1	0
ENSMUSG00000026587	Astn1	0.0357458	0.0501918	0.122805	0.0681093	0.8215	0.65175	1	0
ENSMUSG00000022708	Zbtb20	0.0357533	0.0312561	-0.167839	0.0811949	1	1	1	0	SFARI					1	1
ENSMUSG00000040339	Fam102b	0.0359993	0.048207	0.132568	0.00960824	0.115	0.037	1	0
ENSMUSG00000003273	Car11	0.0360724	0.0263436	0.156469	0.0183701	0.17225	0.07775	1	0
ENSMUSG00000016559	H3f3b	0.0361336	0.0229147	0.170614	0.0249371	0.13125	0.05125	1	0
ENSMUSG00000110710	C78859	0.036181	0.0189384	0.182004	0.0379168	0.16625	0.074	1	0
ENSMUSG00000021087	Rtn1	0.0364035	0.0547303	0.284828	0.0873486	0.94875	0.877	1	0
ENSMUSG00000072769	Gm10419	0.0364794	0.028515	0.143771	0.0224614	0.16425	0.06975	1	0
ENSMUSG00000015092	Edf1	0.0365311	0.032334	0.124576	0.028897	0.12925	0.047	1	0
ENSMUSG00000032870	Smap2	0.036701	0.0271301	0.113598	0.0263933	0.13925	0.05325	1	0
ENSMUSG00000031099	Smarca1	0.0368245	0.0218977	0.196732	0.024811	0.17225	0.08	1	0
ENSMUSG00000052748	Swt1	0.0371089	0.0168647	0.146671	0.0438546	0.199	0.09625	1	0
ENSMUSG00000037138	Aff3	0.0372337	0.059754	0.229467	0.0633169	0.8565	0.7705	1	0
ENSMUSG00000028645	Slc2a1	0.0374064	0.0148103	0.101346	0.0128335	0.113	0.041	1	0
ENSMUSG00000022021	Diaph3	0.0375463	0.0366701	-0.157728	0.0425384	0.074	0.17625	1	0
ENSMUSG00000060924	Csmd1	0.0377902	0.036138	0.163791	0.110105	0.992	0.98375	1	0	SFARI					2	0
ENSMUSG00000022914	Brwd1	0.0381412	0.0455354	0.245819	0.084551	0.4445	0.2845	1	0
ENSMUSG00000032087	Dscaml1	0.0390057	0.0524758	0.121855	0.0299354	0.67225	0.50425	1	0
ENSMUSG00000024421	Lama3	0.0393223	0.0207587	-0.205666	0.0279094	0.10275	0.195	1	0
ENSMUSG00000025909	Sntg1	0.0398979	0.0766286	0.203383	0.085108	0.957	0.87075	1	0
ENSMUSG00000062006	Rpl34	0.0401191	0.025879	0.151319	0.0410646	0.127	0.047	1	0	EAGLE		No scorable evidence	0	Concordant
ENSMUSG00000039835	Nhsl1	0.0401367	0.0643926	-0.383755	0.106365	0.37075	0.51025	1	0
ENSMUSG00000028289	Epha7	0.040335	0.0403266	0.143189	0.0696509	0.72725	0.58625	1	0
ENSMUSG00000044340	Phlpp1	0.0405788	0.0422564	-0.351247	0.0523508	0.8875	0.8975	1	0
ENSMUSG00000117286	Gm1043	0.0407147	0.0471853	0.160121	0.0398846	0.166	0.074	1	0
ENSMUSG00000020823	Sec14l1	0.0408347	0.0238855	0.201427	0.0825624	0.25375	0.1395	1	0
ENSMUSG00000041757	Plekha6	0.0408632	0.0537437	0.171218	0.0478811	0.131	0.04725	1	0
ENSMUSG00000001986	Gria3	0.0409776	0.0612354	0.222771	0.0600146	0.943	0.88725	1	0	SFARI						1
ENSMUSG00000043154	Ppp2r3a	0.0415801	0.0392849	-0.291364	0.0422365	0.21725	0.34	1	0
ENSMUSG00000015829	Tnr	0.0418369	0.0272623	0.278472	0.11173	0.7825	0.6765	1	0
ENSMUSG00000025551	Fgf14	0.0419294	0.0665003	0.500367	0.0688031	1	1	1	0	SFARI					3	0
ENSMUSG00000021501	Caml	0.0419314	0.0203352	0.116836	0.0240435	0.13525	0.05525	1	0
ENSMUSG00000036833	Pnpla7	0.0420057	0.00900193	-0.269597	0.0359286	0.3135	0.42625	1	0	SFARI					2	0
ENSMUSG00000042744	Hectd4	0.042023	0.039578	0.152065	0.0361715	0.58	0.40775	1	0	SFARI					1	0
ENSMUSG00000034780	B3galt1	0.0422774	0.0485199	-0.234175	0.0948012	0.996	1	1	0
ENSMUSG00000020271	Fbxw11	0.0424128	0.0451952	-0.317355	0.0381301	0.164	0.2725	1	0
ENSMUSG00000028488	Sh3gl2	0.0425285	0.0791134	0.157638	0.0646278	0.617	0.451	1	0
ENSMUSG00000024008	Cpne5	0.0427527	0.0445768	0.201733	0.0831389	0.12725	0.043	1	0
ENSMUSG00000033307	Mif	0.0427997	0.0327749	0.207391	0.030732	0.17425	0.084	1	0
ENSMUSG00000061244	Exoc5	0.0433611	0.0330399	0.257306	0.0449386	0.25	0.1375	1	0	SFARI					2	0
ENSMUSG00000078676	Casc3	0.0437284	0.019133	0.194996	0.026177	0.135	0.05725	1	0
ENSMUSG00000062397	Zfp706	0.0437497	0.0154338	0.155222	0.00415481	0.14175	0.0615	1	0
ENSMUSG00000037112	Sik2	0.0438896	0.032239	0.142107	0.0461863	0.36275	0.22975	1	0
ENSMUSG00000052062	Pard3b	0.0439928	0.034457	-0.260425	0.0964859	0.33375	0.459	1	0	SFARI					2	0
ENSMUSG00000041014	Nrg3	0.0440913	0.0728033	0.137977	0.142352	0.94675	0.932	1	0
ENSMUSG00000023944	Hsp90ab1	0.0441438	0.043916	0.310793	0.0762998	0.336	0.21325	1	0
ENSMUSG00000021221	Dpf3	0.0441793	0.0277581	-0.283511	0.0685231	0.12525	0.22125	1	0
ENSMUSG00000054733	Msra	0.0442137	0.0469298	0.097982	0.0638207	0.7195	0.5655	1	0	SFARI					3	0
ENSMUSG00000028804	Csmd2	0.0446445	0.0479923	0.147887	0.0229629	0.64575	0.50425	1	0
ENSMUSG00000026904	Slc4a10	0.0447513	0.039943	0.120838	0.0240454	0.836	0.76225	1	0	SFARI					2	0
ENSMUSG00000031605	Klhl2	0.0448064	0.0574296	0.130651	0.0511548	0.46925	0.31125	1	0
ENSMUSG00000074657	Kif5a	0.0449617	0.0611984	0.121662	0.0503055	0.13725	0.05125	1	0
ENSMUSG00000031748	Gnao1	0.0449698	0.0504023	-0.207043	0.0464332	0.918	0.9405	1	0
ENSMUSG00000053819	Camk2d	0.0449757	0.0410627	-0.22723	0.0604384	0.15575	0.26425	1	0
ENSMUSG00000022454	Nell2	0.045054	0.0397312	0.144707	0.0406407	0.75225	0.6455	1	0
ENSMUSG00000020661	Dnmt3a	0.045276	0.0424818	0.204217	0.0658271	0.64975	0.4835	1	0	SFARI;EAGLE;TADA	2.97e-07	Definitive	15.9	Concordant	1	1
ENSMUSG00000032518	Rpsa	0.0453961	0.0748001	0.224236	0.0648383	0.1825	0.082	1	0
ENSMUSG00000035164	Zc3h12c	0.0453981	0.0447379	0.212992	0.033218	0.16	0.07175	1	0
ENSMUSG00000027210	Meis2	0.0455702	0.0510262	0.195963	0.0439597	0.9815	0.92025	1	0	SFARI;EAGLE;TADA	0.00517313	Moderate	7.5	Discordant	1	1
ENSMUSG00000055839	Elob	0.0459761	0.0702684	0.199341	0.0516134	0.207	0.0985	1	0
ENSMUSG00000019254	Ppp1r12c	0.0463222	0.0522893	0.175382	0.042529	0.17625	0.082	1	0
ENSMUSG00000022577	Ly6h	0.046435	0.0413642	0.131703	0.0601411	0.14525	0.0595	1	0
ENSMUSG00000052942	Glis3	0.0465939	0.0583205	-0.403838	0.0709736	0.4345	0.53275	1	0
ENSMUSG00000034686	Prr7	0.0467129	0.077399	0.164437	0.0543825	0.115	0.03275	1	0
ENSMUSG00000028158	Mttp	0.0467268	0.0196832	0.111462	0.0139091	0.109	0.039	1	0
ENSMUSG00000023861	Mpc1	0.0470825	0.0214067	0.0872848	0.0140506	0.1355	0.0555	1	0
ENSMUSG00000020389	Cdkl3	0.0472908	0.0497137	0.140242	0.0408311	0.117	0.041	1	0
ENSMUSG00000032570	Atp2c1	0.0473712	0.0586191	0.187565	0.0394141	0.60025	0.4365	1	0
ENSMUSG00000030180	Kdm5a	0.0473889	0.0352548	0.2177	0.0391367	0.2725	0.15775	1	0	SFARI					2	0
ENSMUSG00000020627	Klhl29	0.0474874	0.0453608	0.167011	0.015615	0.83	0.75425	1	0
ENSMUSG00000047454	Gphn	0.0475908	0.049575	-0.277459	0.0610954	0.988	0.992	1	0	SFARI					2	0
ENSMUSG00000034687	Fras1	0.0476031	0.0899921	0.199965	0.0577989	0.25	0.113	1	0
ENSMUSG00000002010	Idh3g	0.0479063	0.0402416	0.16763	0.0442788	0.13725	0.05525	1	0
ENSMUSG00000038910	Plcl2	0.0482308	0.0333191	0.131055	0.0514446	0.8115	0.73375	1	0
ENSMUSG00000075318	Scn2a	0.048233	0.0902917	0.204361	0.0607055	0.8525	0.77025	1	0	SFARI;EAGLE;TADA	0	Definitive	109.3	Concordant	1	0
ENSMUSG00000058600	Rpl30	0.048257	0.0226954	0.116007	0.0235951	0.13125	0.05525	1	0
ENSMUSG00000016346	Kcnq2	0.0483346	0.0607782	0.137428	0.0561205	0.1415	0.05525	1	0	SFARI					2	0
ENSMUSG00000027201	Myef2	0.0483851	0.0589814	0.0975785	0.0381483	0.53875	0.3585	1	0
ENSMUSG00000016386	Mpped2	0.0490462	0.0402995	0.110464	0.0540471	0.38125	0.24175	1	0
ENSMUSG00000036503	Rnf13	0.0492635	0.0295736	-0.27058	0.0406775	0.15575	0.25	1	0
ENSMUSG00000026058	Khdrbs2	0.0494904	0.0443411	0.193398	0.123703	0.22125	0.11275	1	0	SFARI					2	0

## Sheet: Microglia
ensembl	gene	p_val.mean	p_val.std	avg_log2FC.mean	avg_log2FC.std	pct.1.mean	pct.2.mean	padj.mean	padj.std	ASD.status	TADA.FDR	EAGLE.annotation	EAGLE.score	EAGLE.concordance	SFARI.score	SFARI.syndromic

## Sheet: Oligodendrocyte
ensembl	gene	p_val.mean	p_val.std	avg_log2FC.mean	avg_log2FC.std	pct.1.mean	pct.2.mean	padj.mean	padj.std	ASD.status	TADA.FDR	EAGLE.annotation	EAGLE.score	EAGLE.concordance	SFARI.score	SFARI.syndromic
ENSMUSG00000092341	Malat1	3.17634e-10	8.97438e-10	-0.310338	0.0246799	1	1	9.61859e-06	2.71762e-05
ENSMUSG00000031425	Plp1	5.01436e-10	1.02404e-09	0.308429	0.0172926	1	1	1.51845e-05	3.101e-05
ENSMUSG00000025203	Scd2	2.31044e-05	4.99734e-05	0.409652	0.0541094	0.788909	0.698545	0.300118	0.375372
ENSMUSG00000037706	Cd81	0.0001361	0.000263898	0.407059	0.0515675	0.620364	0.493727	0.574203	0.439271
ENSMUSG00000036634	Mag	0.000143085	0.000347764	0.315859	0.0431041	0.834182	0.732091	0.300065	0.450554
ENSMUSG00000026109	Tmeff2	0.000266834	0.000423505	-0.230361	0.0664002	1	1	0.455436	0.451601
ENSMUSG00000020719	Ddx5	0.000318685	0.000601529	0.342878	0.0751654	0.997	0.996636	0.411794	0.473576
ENSMUSG00000063511	Snrnp70	0.000375047	0.000787077	0.290855	0.0413311	0.985364	0.976182	0.699233	0.431482
ENSMUSG00000069670	Nkain2	0.00133948	0.00244574	-0.171801	0.0231611	1	1	0.921702	0.259687
ENSMUSG00000036469	Marchf1	0.00135973	0.00387592	-0.264974	0.0539503	0.945455	0.964091	0.80655	0.350863
ENSMUSG00000022462	Slc38a2	0.00171406	0.00187008	0.283768	0.0522666	0.465091	0.362091	1	0
ENSMUSG00000036529	Sbf1	0.00184281	0.00252226	0.303011	0.0363186	0.487727	0.381545	0.994844	0.0171019	SFARI					2	0
ENSMUSG00000037996	Slc24a2	0.00235487	0.00250603	-0.183972	0.0311017	1	0.999727	0.955471	0.147686	SFARI					2	0
ENSMUSG00000040003	Magi2	0.00250642	0.0051987	-0.159609	0.0354929	1	1	1	0
ENSMUSG00000032841	Prr5l	0.00252897	0.00422128	-0.276956	0.0607446	0.638182	0.729364	0.91034	0.297368
ENSMUSG00000054640	Slc8a1	0.00274839	0.00282525	-0.192213	0.0239279	0.966	0.985273	1	0
ENSMUSG00000049252	Lrp1b	0.00286982	0.00478487	-0.180914	0.0421077	0.995	0.995364	0.934673	0.214679
ENSMUSG00000008348	Ubc	0.00294596	0.0031306	0.269239	0.0467408	0.177727	0.0991818	0.921522	0.260281
ENSMUSG00000034488	Edil3	0.00326274	0.00484632	-0.212248	0.0312183	0.986091	0.994818	1	0
ENSMUSG00000028565	Nfia	0.00412103	0.00751548	-0.332454	0.0707133	0.321182	0.430273	1	0	SFARI					2	0
ENSMUSG00000028525	Pde4b	0.00463003	0.00838679	-0.201645	0.040775	1	1	0.918684	0.269695
ENSMUSG00000025375	Aatk	0.00473667	0.0121189	0.32829	0.0552834	0.585273	0.495909	0.910494	0.296859
ENSMUSG00000068923	Syt11	0.00502113	0.00784618	0.240509	0.0480494	0.700636	0.604727	0.958179	0.138704
ENSMUSG00000105891	A230001M10Rik	0.00553811	0.0103783	-0.185218	0.0359698	0.22	0.321727	1	0
ENSMUSG00000034751	Mast4	0.00613858	0.0148981	-0.198635	0.0491385	0.966545	0.977273	0.89826	0.256291
ENSMUSG00000072235	Tuba1a	0.00676124	0.0123632	0.310391	0.0598169	0.271273	0.179909	1	0
ENSMUSG00000034317	Trim59	0.00711786	0.0146873	-0.117732	0.0437121	0.153545	0.244818	1	0
ENSMUSG00000030020	Prickle2	0.00752969	0.0146999	-0.264436	0.049502	0.983091	0.992818	0.897213	0.283757	SFARI					2	0
ENSMUSG00000006782	Cnp	0.00836397	0.0176673	0.21937	0.0357943	0.384455	0.284364	1	0
ENSMUSG00000041112	Elmo1	0.00953634	0.0160843	-0.228289	0.0676713	0.960182	0.963545	0.849735	0.341125
ENSMUSG00000035202	Lars2	0.00962129	0.00569553	0.219202	0.0278694	0.204091	0.135273	1	0
ENSMUSG00000060843	Ctnna3	0.00974574	0.0260095	-0.275909	0.0750387	0.971818	0.980455	0.870971	0.31222	SFARI					2	0
ENSMUSG00000026077	Npas2	0.0102707	0.019927	0.105571	0.0189787	0.244182	0.160909	1	0	SFARI					2	0
ENSMUSG00000089941	Gm16168	0.0102959	0.0131656	-0.306565	0.0651593	0.387818	0.482727	0.920643	0.213199
ENSMUSG00000032554	Trf	0.0110081	0.0192069	0.230321	0.0326158	0.880545	0.842091	1	0
ENSMUSG00000022748	Cmss1	0.0111088	0.0125632	0.290732	0.0557971	0.974727	0.976182	0.94023	0.198235
ENSMUSG00000031714	Gab1	0.0114405	0.0187205	-0.244912	0.0641617	0.413818	0.506909	1	0
ENSMUSG00000061904	Slc25a3	0.0120717	0.0207441	0.227803	0.0549502	0.466545	0.372545	0.977552	0.0744523
ENSMUSG00000079659	Tmem243	0.0137865	0.0241809	0.171327	0.0386082	0.123273	0.0643636	1	0
ENSMUSG00000001270	Ckb	0.0141962	0.0387016	0.155754	0.0428387	0.822364	0.755909	1	0
ENSMUSG00000052544	St6galnac3	0.0144925	0.0251497	-0.190189	0.056911	0.979091	0.973727	0.914351	0.284067
ENSMUSG00000030209	Grin2b	0.0148893	0.0184563	0.0611784	0.0166848	0.980091	0.983727	1	0	SFARI;EAGLE;TADA	2.49e-09	Definitive	29.65	Concordant	1	0
ENSMUSG00000003974	Grm3	0.0148996	0.0253103	-0.197671	0.0573375	0.956	0.956727	1	0
ENSMUSG00000042846	Lrrtm3	0.0159276	0.0293194	-0.125808	0.0555786	0.951545	0.972636	0.95375	0.153394
ENSMUSG00000021010	Npas3	0.0177173	0.0209533	-0.272633	0.0674769	0.304182	0.389909	1	0
ENSMUSG00000022270	Retreg1	0.0181485	0.0294426	-0.199024	0.0342413	0.161636	0.236	1	0
ENSMUSG00000026442	Nfasc	0.020616	0.0234179	0.274157	0.060551	0.932273	0.889818	1	0
ENSMUSG00000033530	Ttc7b	0.0209635	0.0223951	0.135544	0.0391904	0.276091	0.196909	1	0
ENSMUSG00000035765	Dym	0.0216351	0.0329388	0.155397	0.0589293	0.375818	0.286273	1	0
ENSMUSG00000037940	Inpp4b	0.0232743	0.030437	0.105931	0.0143672	0.360636	0.280182	1	0
ENSMUSG00000008763	Man1a2	0.0233837	0.024856	0.129946	0.0298256	0.455273	0.371545	1	0
ENSMUSG00000027375	Mal	0.0250033	0.044953	0.282374	0.0715642	0.713364	0.661818	1	0
ENSMUSG00000022353	Mtss1	0.0251272	0.0345688	-0.153106	0.0413792	0.0917273	0.150545	1	0
ENSMUSG00000029108	Pcdh7	0.0255903	0.0226906	0.129254	0.043168	0.993273	0.992727	1	0
ENSMUSG00000022139	Mbnl2	0.0260066	0.0481223	-0.169068	0.056802	0.985182	0.991364	0.932285	0.224586
ENSMUSG00000036667	Tcaf1	0.0262351	0.0425582	0.114988	0.0438424	0.311364	0.229273	1	0
ENSMUSG00000026944	Abca2	0.0266423	0.0586669	0.207385	0.047828	0.486273	0.406636	1	0
ENSMUSG00000021910	Nisch	0.0272722	0.0496068	0.187722	0.0606657	0.417364	0.316909	0.950655	0.163659
ENSMUSG00000034040	Galnt17	0.0279772	0.0349528	0.0744148	0.0326434	0.243273	0.168545	1	0
ENSMUSG00000039145	Camk1d	0.0284411	0.0322655	0.189199	0.0528172	0.980909	0.986727	1	0
ENSMUSG00000101872	Gm29237	0.029278	0.0228168	0.108061	0.0126415	0.103889	0.0593333	1	0
ENSMUSG00000037653	Kctd8	0.0295113	0.0367932	0.0934956	0.0319131	0.301636	0.225273	1	0
ENSMUSG00000038388	Pals2	0.0306012	0.062398	0.102486	0.0257931	0.249909	0.174545	1	0
ENSMUSG00000040721	Zfhx2	0.0308954	0.0400343	0.221618	0.0368439	0.210182	0.145545	1	0
ENSMUSG00000031153	Gripap1	0.0318895	0.0338387	0.215809	0.0397512	0.116364	0.0686364	1	0
ENSMUSG00000052040	Klf13	0.0320798	0.0339423	-0.196894	0.0365204	0.172364	0.238182	1	0
ENSMUSG00000013236	Ptprs	0.0321114	0.0469166	0.111448	0.0300955	0.656364	0.576545	1	0
ENSMUSG00000035441	Myo1d	0.0324644	0.0349061	-0.228112	0.037524	0.268818	0.338636	1	0
ENSMUSG00000058325	Dock1	0.0327034	0.0416898	-0.241038	0.0640449	0.245273	0.325818	1	0	SFARI					2	0
ENSMUSG00000044340	Phlpp1	0.0331239	0.046567	-0.162998	0.0432455	0.996909	0.999727	0.995146	0.016098
ENSMUSG00000038349	Plcl1	0.0352735	0.0475222	-0.136567	0.0491439	1	1	1	0
ENSMUSG00000021219	Rgs6	0.0355359	0.0754896	0.109716	0.0260614	0.244	0.170636	1	0
ENSMUSG00000033545	Znrf1	0.0357424	0.0283598	0.117436	0.0341964	0.456182	0.378364	1	0
ENSMUSG00000023944	Hsp90ab1	0.036046	0.0528628	0.271165	0.0496232	0.272455	0.207455	1	0
ENSMUSG00000035620	Ric8b	0.0368584	0.0347088	0.0910934	0.0251638	0.352	0.275364	1	0
ENSMUSG00000032060	Cryab	0.0368658	0.0492965	0.213417	0.0524794	0.302545	0.235545	1	0
ENSMUSG00000038844	Kif16b	0.0380298	0.0401878	-0.167211	0.0412664	0.0856364	0.135909	1	0
ENSMUSG00000031708	Tecr	0.0381004	0.0731415	0.263653	0.06823	0.308818	0.234	1	0
ENSMUSG00000030168	Adipor2	0.0384299	0.0819968	-0.258869	0.0859671	0.370364	0.447455	1	0
ENSMUSG00000035342	Lzts2	0.0402311	0.0532071	-0.078991	0.0248675	0.0731111	0.125222	1	0	SFARI					2	0
ENSMUSG00000016386	Mpped2	0.0407857	0.0644087	0.0944754	0.0397287	0.441636	0.359273	1	0
ENSMUSG00000054423	Cadps	0.0407945	0.037615	-0.118814	0.0327359	0.966	0.979636	1	0	SFARI					2	0
ENSMUSG00000024661	Fth1	0.0409135	0.042943	0.305819	0.065457	0.673091	0.621182	1	0
ENSMUSG00000109125	Gm45159	0.041374	0.050964	0.0914299	0.0231845	0.336909	0.264091	1	0
ENSMUSG00000037625	Cldn11	0.0414601	0.047058	0.183138	0.0475	0.711909	0.637455	1	0
ENSMUSG00000050840	Cdh20	0.0417132	0.0934229	-0.234253	0.0737619	0.396818	0.488636	1	0
ENSMUSG00000060803	Gstp1	0.0428953	0.062691	0.0784203	0.0220394	0.125455	0.0751818	0.977091	0.0759802
ENSMUSG00000026737	Pip4k2a	0.0430477	0.100996	-0.255385	0.0704265	0.331091	0.425636	1	0
ENSMUSG00000036833	Pnpla7	0.0433514	0.0459654	0.0857647	0.0117846	0.114	0.0678182	1	0	SFARI					2	0
ENSMUSG00000024302	Dtna	0.0437423	0.0909088	-0.174581	0.0374737	0.905636	0.904455	1	0
ENSMUSG00000041607	Mbp	0.043792	0.0692577	-0.148267	0.0375635	0.929636	0.968364	1	0
ENSMUSG00000005871	Apc	0.0440061	0.047536	-0.158068	0.0370105	0.936909	0.937818	1	0
ENSMUSG00000036264	Fstl4	0.0450393	0.06536	0.0580371	0.0158755	0.255455	0.188182	1	0
ENSMUSG00000097736	9530059O14Rik	0.0451149	0.0549152	0.0790879	0.0333927	0.966636	0.944727	1	0
ENSMUSG00000035649	Zcchc7	0.0455219	0.0602329	-0.1738	0.0477872	0.980455	0.988818	1	0
ENSMUSG00000040640	Erc2	0.0463514	0.0582873	0.0269475	0.0211051	0.978909	0.983273	1	0
ENSMUSG00000075706	Gpx4	0.0464099	0.0463201	0.106246	0.0235629	0.106778	0.0641111	1	0
ENSMUSG00000002625	Akap8l	0.0476725	0.0561774	0.131574	0.0373117	0.778091	0.712	1	0
ENSMUSG00000055109	Gm15155	0.0483223	0.0832332	0.0751314	0.023636	0.368	0.290455	1	0	SFARI;EAGLE		Definitive	17.6	Discordant	2	0

## Sheet: Polydendrocyte
ensembl	gene	p_val.mean	p_val.std	avg_log2FC.mean	avg_log2FC.std	pct.1.mean	pct.2.mean	padj.mean	padj.std	ASD.status	TADA.FDR	EAGLE.annotation	EAGLE.score	EAGLE.concordance	SFARI.score	SFARI.syndromic
ENSMUSG00000020719	Ddx5	0.000265309	0.000162616	0.371484	0.0126364	0.9795	0.969	1	0
ENSMUSG00000024524	Gnal	0.000428103	0.000622927	0.269284	0.0389193	0.40475	0.22725	1	0
ENSMUSG00000041216	Clvs1	0.000441781	0.00060581	0.194369	0.0224945	0.33325	0.16675	1	0
ENSMUSG00000040785	Ttc3	0.00110923	0.0015431	0.252184	0.047099	0.96925	0.90725	1	0
ENSMUSG00000048251	Bcl11b	0.00129644	0.000888804	0.203861	0.0174808	0.32275	0.1735	1	0
ENSMUSG00000014355	Anapc1	0.0014653	0.000877455	-0.262014	0.0255017	0.07	0.1815	1	0
ENSMUSG00000026335	Pam	0.00147168	0.00177069	0.286541	0.0459294	0.47175	0.28475	0.867649	0.264702
ENSMUSG00000087231	E230016M11Rik	0.0016582	0.00299826	-0.257692	0.0552442	0.0525	0.16925	1	0
ENSMUSG00000044667	Plppr4	0.00181782	0.00175662	0.191581	0.0308928	0.511	0.328	1	0
ENSMUSG00000074776	Gm10754	0.00313946	0.00332477	0.252282	0.0375151	0.4395	0.28225	1	0
ENSMUSG00000061080	Lsamp	0.00336179	0.00179283	-0.143273	0.016723	1	1	1	0
ENSMUSG00000007891	Ctsd	0.00354668	0.00371436	0.216819	0.0295993	0.1315	0.04025	1	0
ENSMUSG00000034820	Cpsf7	0.00363217	0.00162422	-0.198737	0.0143097	0.03925	0.121	1	0	TADA	0.0252972
ENSMUSG00000018474	Chd3	0.00371856	0.00269393	0.306365	0.0384663	0.2175	0.106	1	0	SFARI					1	1
ENSMUSG00000024044	Epb41l3	0.00394454	0.00411173	0.245111	0.0346814	0.2645	0.13725	1	0
ENSMUSG00000050840	Cdh20	0.00459357	0.0035554	-0.352953	0.0341485	0.508	0.652	1	0
ENSMUSG00000009569	Mrtfb	0.00464601	0.00384257	0.14915	0.0270922	0.74575	0.574	1	0	SFARI					2	0
ENSMUSG00000052512	Nav2	0.00499499	0.00494234	-0.282717	0.0378562	0.962	0.957	1	0	SFARI					2	0
ENSMUSG00000007653	Gabrb2	0.00535048	0.00462995	0.149888	0.0519987	0.66	0.488	1	0	SFARI;EAGLE		Limited	0.3	Discordant	1	0
ENSMUSG00000051910	Sox6	0.00540931	0.00449477	-0.264404	0.0323885	0.8685	0.92475	1	0	SFARI						1
ENSMUSG00000061911	Myt1l	0.00562601	0.00375628	0.209212	0.0171684	0.9365	0.90025	1	0	SFARI;EAGLE;TADA	7.02e-08	Definitive	20.35	Concordant	1	0
ENSMUSG00000021730	Hcn1	0.00565138	0.00627868	0.148079	0.0536084	0.40175	0.25125	1	0	SFARI						1
ENSMUSG00000051359	Ncald	0.00569185	0.00527045	-0.207123	0.0355958	0.3075	0.48125	1	0
ENSMUSG00000057060	Slc35f3	0.0057813	0.00329939	0.182036	0.0140193	0.29025	0.16675	1	0
ENSMUSG00000027447	Cst3	0.00585094	0.00656767	0.513513	0.0600539	0.5455	0.4355	1	0
ENSMUSG00000046079	Lrrc8d	0.00588919	0.00780086	-0.260516	0.0296357	0.1385	0.26225	1	0
ENSMUSG00000063511	Snrnp70	0.00603129	0.00906519	0.231304	0.0340144	0.9365	0.83325	1	0
ENSMUSG00000021779	Thrb	0.00607464	0.00751735	0.179699	0.0356426	0.8505	0.69625	1	0
ENSMUSG00000097736	9530059O14Rik	0.00692589	0.00713938	0.141343	0.0232156	0.65075	0.5055	1	0
ENSMUSG00000021103	Mnat1	0.00741579	0.0116438	-0.22552	0.0852057	0.09825	0.2175	1	0
ENSMUSG00000021301	Hecw1	0.00770231	0.0064914	0.152024	0.0345158	0.47175	0.313	1	0
ENSMUSG00000055980	Irs1	0.00825037	0.0123383	0.227969	0.0382306	0.15975	0.066	1	0
ENSMUSG00000032536	Trak1	0.00935985	0.00529864	-0.187969	0.0248795	0.059	0.144	1	0
ENSMUSG00000024617	Camk2a	0.009621	0.00761885	0.146804	0.0244213	0.409	0.27275	1	0	SFARI					2	1
ENSMUSG00000022799	Arhgap31	0.00965905	0.00847148	-0.331499	0.0364638	0.58725	0.672	1	0
ENSMUSG00000097391	Mirg	0.0100206	0.0140707	0.213883	0.0536451	0.2125	0.105	1	0
ENSMUSG00000022564	Grina	0.0100344	0.0113059	0.283117	0.0358014	0.18	0.08725	1	0
ENSMUSG00000036510	Cdh8	0.0100401	0.00825813	0.1721	0.0251251	0.67725	0.54575	1	0	SFARI					2	0
ENSMUSG00000041380	Htr2c	0.0101801	0.0100401	0.115156	0.0539695	0.167	0.07425	1	0
ENSMUSG00000045658	Pid1	0.0106397	0.013784	-0.242261	0.0581165	0.629	0.773	1	0
ENSMUSG00000031532	Saraf	0.0106697	0.00959446	0.248412	0.0346687	0.14675	0.0645	1	0
ENSMUSG00000104093	A330015K06Rik	0.0112937	0.00891176	0.137396	0.0337937	0.37625	0.238	1	0
ENSMUSG00000024277	Mapre2	0.0113968	0.00794793	-0.257337	0.0625638	0.07375	0.1585	1	0
ENSMUSG00000021448	Shc3	0.0115995	0.0146411	-0.251085	0.0728237	0.1385	0.24725	1	0
ENSMUSG00000061288	Taok3	0.0117925	0.0107685	-0.198862	0.0357526	0.054	0.137	1	0
ENSMUSG00000038910	Plcl2	0.0118097	0.0118895	0.176648	0.0562084	0.672	0.531	1	0
ENSMUSG00000038296	Galnt18	0.0121873	0.00747023	0.0792258	0.0336415	0.161	0.074	1	0
ENSMUSG00000053141	Ptprt	0.0125948	0.0116372	-0.216872	0.0275246	1	0.988	1	0	SFARI					2	0
ENSMUSG00000053025	Sv2b	0.0126185	0.0117436	0.124463	0.0227564	0.156	0.07	1	0
ENSMUSG00000009470	Tnpo1	0.0131002	0.0111188	-0.274317	0.0393207	0.3505	0.49875	1	0
ENSMUSG00000060206	Zfp462	0.0132619	0.0172094	-0.28124	0.0393794	0.58075	0.7085	1	0	SFARI;EAGLE		Moderate	10.6	Discordant	1	1
ENSMUSG00000053477	Tcf4	0.0135613	0.0106885	-0.187431	0.0298687	0.995	0.9935	1	0	SFARI;EAGLE;TADA	0.00271594	Definitive	13.5	Concordant	1	1
ENSMUSG00000106379	Lhfpl3	0.0135913	0.0102064	-0.175902	0.0203205	1	1	1	0
ENSMUSG00000026585	Kifap3	0.0136551	0.0128269	0.216488	0.0399563	0.53925	0.3815	1	0
ENSMUSG00000026586	Prrx1	0.0139592	0.00927851	-0.141467	0.0100042	0.14375	0.2475	1	0
ENSMUSG00000021010	Npas3	0.0140249	0.0135511	-0.264874	0.0458613	0.91275	0.95025	1	0
ENSMUSG00000025372	Baiap2	0.0141128	0.004653	0.130611	0.0143834	0.2355	0.133	1	0
ENSMUSG00000075555	Gm10863	0.014182	0.0142511	-0.105755	0.034807	0.086	0.17875	1	0
ENSMUSG00000020181	Nav3	0.0143235	0.0244781	-0.189332	0.0483606	1	1	1	0	SFARI					2	0
ENSMUSG00000032481	Smarcc1	0.0144771	0.0209588	-0.24114	0.0496216	0.18825	0.3075	1	0
ENSMUSG00000068151	A230006K03Rik	0.0147083	0.0140481	0.117549	0.0220903	0.70975	0.586	1	0
ENSMUSG00000030134	Rasgef1a	0.0148316	0.0169681	0.117564	0.032594	0.305	0.18275	1	0
ENSMUSG00000026764	Kif5c	0.0149476	0.0145837	-0.234334	0.0352454	0.0725	0.15475	1	0	SFARI;TADA	0.017695				2	1
ENSMUSG00000041272	Tox	0.0149848	0.0227787	-0.324661	0.0571912	0.42325	0.55525	1	0
ENSMUSG00000035158	Mitf	0.0151203	0.00845922	-0.202733	0.0434481	0.1535	0.26325	1	0
ENSMUSG00000048264	Dip2c	0.0151668	0.0181308	-0.260456	0.0499247	0.978	0.973	1	0	SFARI					2	0
ENSMUSG00000041078	Grid1	0.0153174	0.0170438	-0.223011	0.0616755	0.984	0.99325	1	0	SFARI					2	0
ENSMUSG00000054555	Adam12	0.0153431	0.0161464	-0.263159	0.0151929	0.37225	0.51075	1	0
ENSMUSG00000074024	4632427E13Rik	0.0155196	0.0103412	-0.21949	0.0204323	0.08975	0.176	1	0
ENSMUSG00000101621	Gm28905	0.0160305	0.0141036	0.132003	0.0512559	0.177	0.0875	1	0
ENSMUSG00000024083	Pja2	0.0163844	0.0149625	0.228375	0.0550763	0.2875	0.17475	1	0
ENSMUSG00000029211	Gabra4	0.0164649	0.0141318	0.114048	0.0219453	0.21375	0.11575	1	0	SFARI					2	0
ENSMUSG00000037470	Uggt1	0.0167979	0.0169678	0.234736	0.0323176	0.129	0.05525	1	0
ENSMUSG00000058589	Anks1b	0.0168076	0.00530706	-0.146158	0.0192842	1	1	1	0	SFARI					2	1
ENSMUSG00000057716	Tmem178b	0.0168751	0.0140673	-0.213879	0.0289924	0.9205	0.922	1	0
ENSMUSG00000054863	Tafa5	0.0170417	0.00917321	-0.229177	0.0248759	0.172	0.281	1	0
ENSMUSG00000045071	E130308A19Rik	0.0174295	0.0184624	-0.21313	0.0745247	0.151	0.25825	1	0
ENSMUSG00000097545	Mir124a-1hg	0.0186404	0.00951826	0.138703	0.0229381	0.4005	0.26775	1	0
ENSMUSG00000024211	Grm8	0.0188416	0.0182295	0.181435	0.0395192	0.41525	0.277	1	0
ENSMUSG00000068040	Tm9sf4	0.0189928	0.0114543	0.285001	0.0315959	0.168	0.08725	1	0	SFARI;EAGLE;TADA	0.0367454	Limited	0.5	Discordant	1	0
ENSMUSG00000093528	Nrg3os	0.019466	0.0135016	-0.264783	0.0611096	0.091	0.176	1	0
ENSMUSG00000001270	Ckb	0.0196959	0.0247816	0.313974	0.0719289	0.53375	0.41	1	0
ENSMUSG00000056427	Slit3	0.0197945	0.00709145	0.107995	0.00871795	0.77275	0.6615	1	0
ENSMUSG00000041697	Cox6a1	0.0200876	0.0148807	0.27733	0.0156841	0.234	0.14125	1	0
ENSMUSG00000036019	Tmtc2	0.0206109	0.00854406	-0.274716	0.0207776	0.35175	0.45975	1	0
ENSMUSG00000024535	Snx24	0.020988	0.0140061	-0.190991	0.0283158	0.08475	0.16925	1	0
ENSMUSG00000036943	Rab8b	0.0210008	0.0193322	0.223535	0.0438629	0.2175	0.121	1	0
ENSMUSG00000118664	Tusc3	0.0212122	0.028376	0.190702	0.090254	0.535	0.36825	1	0
ENSMUSG00000022523	Fgf12	0.0212915	0.0154305	-0.240271	0.0365365	0.995	0.99875	1	0
ENSMUSG00000060703	Cd302	0.0215515	0.0242457	0.0885988	0.0126763	0.1065	0.0405	1	0
ENSMUSG00000026914	Psmd14	0.0219099	0.0152865	-0.268823	0.0610055	0.118	0.20575	1	0
ENSMUSG00000029088	Kcnip4	0.0222061	0.027482	0.0869663	0.0619973	0.941	0.96225	1	0
ENSMUSG00000019828	Grm1	0.022316	0.0148162	0.122799	0.0323188	0.73125	0.62125	1	0
ENSMUSG00000036893	Ehmt1	0.0224117	0.0307775	-0.288455	0.120342	0.18125	0.301	1	0	SFARI;EAGLE;TADA	0.00059384	Definitive	13.5	Concordant	1	1
ENSMUSG00000057897	Camk2b	0.0237222	0.0239577	0.176195	0.0468566	0.462	0.324	1	0	SFARI						1
ENSMUSG00000048001	Hes5	0.0240389	0.0169457	0.104938	0.0177528	0.16425	0.0835	1	0
ENSMUSG00000020599	Rgs9	0.0241397	0.0151068	0.0924094	0.0328523	0.36025	0.23125	1	0
ENSMUSG00000034730	Adgrb1	0.0242883	0.0187616	0.232395	0.0578566	0.22575	0.12775	1	0
ENSMUSG00000054752	Fsd1l	0.0243722	0.0398219	-0.164976	0.0677345	0.0835	0.1785	1	0
ENSMUSG00000004113	Cacna1b	0.0244106	0.0136737	0.248484	0.0155951	0.2245	0.13425	1	0	SFARI					2	0
ENSMUSG00000035569	Ankrd11	0.0246183	0.021273	-0.220123	0.041981	0.84275	0.8885	1	0	SFARI;EAGLE;TADA	1.58e-05	Definitive	22.6	Concordant	1	1
ENSMUSG00000025576	Rbfox3	0.0247189	0.0207888	0.118773	0.0231802	0.699	0.57675	1	0
ENSMUSG00000104302	Gm36975	0.0248769	0.0139616	-0.222139	0.0309074	0.13725	0.23275	1	0
ENSMUSG00000109394	A230057D06Rik	0.0258559	0.0300638	0.209504	0.0444625	0.95825	0.90475	1	0
ENSMUSG00000079157	Nalf1	0.0266657	0.0277072	-0.187799	0.0622347	1	0.9975	1	0
ENSMUSG00000066406	Akap13	0.0270286	0.023553	-0.248233	0.0544423	0.27425	0.36975	1	0
ENSMUSG00000016386	Mpped2	0.0273033	0.00900227	-0.294065	0.0441437	0.24875	0.336	1	0
ENSMUSG00000061578	Ksr2	0.0275244	0.0172485	0.180051	0.0481122	0.22975	0.1345	1	0
ENSMUSG00000020189	Osbpl8	0.0276762	0.0207468	0.192593	0.0370944	0.8145	0.7005	1	0
ENSMUSG00000030020	Prickle2	0.027701	0.0191463	-0.231716	0.0415321	0.81325	0.8095	1	0	SFARI					2	0
ENSMUSG00000069670	Nkain2	0.0278474	0.0300091	0.0854828	0.0777103	0.95325	0.96375	1	0
ENSMUSG00000047888	Tnrc6b	0.0280276	0.024182	0.285128	0.0588598	0.75	0.63175	1	0	SFARI					2	0
ENSMUSG00000002985	Apoe	0.0281648	0.0317116	0.20811	0.0454306	0.882	0.8265	1	0
ENSMUSG00000046159	Chrm3	0.0284662	0.0498148	0.123273	0.0616937	0.328	0.2005	1	0	SFARI					2	0
ENSMUSG00000031425	Plp1	0.0286158	0.0197106	0.195037	0.0870581	0.2825	0.18	1	0
ENSMUSG00000006205	Htra1	0.0289603	0.0289974	0.157105	0.0339307	0.21625	0.12225	1	0
ENSMUSG00000026743	Mllt10	0.0289983	0.0365541	0.187133	0.045585	0.848	0.72975	1	0
ENSMUSG00000027782	Kpna4	0.0293927	0.043941	-0.186263	0.052505	0.075	0.1585	1	0
ENSMUSG00000025816	Sec61a2	0.0297095	0.0491534	-0.237719	0.0633745	0.08475	0.172	1	0
ENSMUSG00000026608	Kctd3	0.0301503	0.0135252	-0.145943	0.0225733	0.062	0.129	1	0
ENSMUSG00000050272	Dscam	0.0308982	0.0335869	-0.195189	0.0400309	0.989	0.996	1	0	SFARI;EAGLE		Definitive	13.5	Concordant	1	0
ENSMUSG00000022750	Klhl22	0.0310459	0.0295703	0.164283	0.0169659	0.1225	0.0565	1	0
ENSMUSG00000051951	Xkr4	0.0318062	0.023038	-0.233309	0.0427464	0.995	0.98775	1	0
ENSMUSG00000033257	Ttll4	0.0318797	0.0262095	0.132965	0.0368059	0.11425	0.04975	1	0
ENSMUSG00000011257	Pabpc4	0.032352	0.0329473	0.204576	0.0346992	0.1585	0.082	1	0
ENSMUSG00000030213	Atf7ip	0.0329028	0.0379977	-0.22752	0.0960018	0.219	0.34	1	0
ENSMUSG00000031700	Gpt2	0.0330014	0.019727	-0.201506	0.0635163	0.2785	0.39225	1	0
ENSMUSG00000046434	Hnrnpa1	0.0332174	0.0418547	0.201454	0.0614362	0.13825	0.058	1	0
ENSMUSG00000019302	Atp6v0a1	0.033572	0.0386302	0.170381	0.0362028	0.48775	0.3535	1	0
ENSMUSG00000043531	Sorcs1	0.0337505	0.0355705	-0.226572	0.0557013	0.892	0.9155	1	0	EAGLE		Limited	0.25	Discordant
ENSMUSG00000020577	Tspan13	0.0338157	0.0256017	-0.139948	0.0351787	0.0525	0.1185	1	0
ENSMUSG00000056999	Ide	0.0343284	0.0420699	-0.233077	0.0612413	0.1355	0.2285	1	0
ENSMUSG00000054162	Spock3	0.0347386	0.0163748	0.137511	0.0217077	0.86975	0.797	1	0
ENSMUSG00000029550	Sppl3	0.0349829	0.0241005	-0.205811	0.0478742	0.14125	0.22575	1	0
ENSMUSG00000023826	Prkn	0.0351126	0.0112408	-0.186028	0.0224384	0.968	0.961	1	0	SFARI					2	0
ENSMUSG00000049176	Frmpd4	0.0351269	0.0284497	0.137817	0.0268295	0.91275	0.903	1	0	SFARI						1
ENSMUSG00000029673	Auts2	0.0353121	0.0135378	-0.217138	0.0242004	0.995	0.9905	1	0	SFARI;EAGLE;TADA	0.0046251	Definitive	35.5	Concordant	1	0
ENSMUSG00000045215	Asxl3	0.0356318	0.0330908	-0.166073	0.026828	0.091	0.171	1	0	SFARI;EAGLE;TADA	6.7e-11	Definitive	28.85	Concordant	1	1
ENSMUSG00000036053	Fmnl2	0.0363861	0.0251612	-0.198802	0.0342991	0.4475	0.5875	1	0
ENSMUSG00000034152	Exoc3	0.0365503	0.0347916	-0.165356	0.0500277	0.054	0.121	1	0	SFARI					2	0
ENSMUSG00000039599	Fam149b	0.0366028	0.0216462	-0.136942	0.021387	0.0525	0.11575	1	0
ENSMUSG00000024589	Nedd4l	0.0366507	0.0163033	0.119825	0.0174463	0.8035	0.692	1	0
ENSMUSG00000047495	Dlgap2	0.0366563	0.0322996	0.0687438	0.0188634	0.91025	0.92175	1	0	SFARI;EAGLE		Limited	2.8	Discordant	2	0
ENSMUSG00000025626	Phf6	0.0370036	0.0192832	-0.179559	0.0221484	0.07375	0.1425	1	0
ENSMUSG00000044071	Tafa2	0.0379607	0.0269578	-0.296429	0.0895953	0.58875	0.6385	1	0
ENSMUSG00000020390	Ube2b	0.0379998	0.036582	0.231693	0.0565492	0.3065	0.21	1	0
ENSMUSG00000035919	Bbs9	0.0381148	0.0574556	-0.209142	0.0391887	0.0795	0.15875	1	0
ENSMUSG00000032537	Ephb1	0.0382206	0.0211085	0.0985155	0.0419102	0.2125	0.12475	1	0	SFARI					3	0
ENSMUSG00000042744	Hectd4	0.0386845	0.0295227	0.209915	0.0314629	0.391	0.27025	1	0	SFARI					1	0
ENSMUSG00000097451	Rian	0.0386987	0.0302959	0.0944739	0.0323814	0.9325	0.89775	1	0
ENSMUSG00000020627	Klhl29	0.0389281	0.0387118	0.104877	0.0230827	0.68825	0.57425	1	0
ENSMUSG00000024758	Rtn3	0.0390187	0.0389886	0.173503	0.0319797	0.82675	0.6855	1	0
ENSMUSG00000020704	Asic2	0.0391322	0.0530238	-0.228961	0.0403705	0.9435	0.93025	1	0
ENSMUSG00000027312	Atrn	0.0392949	0.0252634	-0.314356	0.0185875	0.10075	0.172	1	0
ENSMUSG00000021838	Samd4	0.0394021	0.0329906	-0.213711	0.0549219	0.25925	0.37225	1	0
ENSMUSG00000022811	Zfp148	0.0403809	0.0362815	-0.266084	0.0660691	0.23825	0.32925	1	0
ENSMUSG00000022708	Zbtb20	0.040511	0.0284149	0.190905	0.0309235	1	0.99875	1	0	SFARI					1	1
ENSMUSG00000000861	Bcl11a	0.0405156	0.0443047	0.0824354	0.0257934	0.134	0.066	1	0	SFARI;EAGLE;TADA	0.00044409	Moderate	9.15	Discordant	1	1
ENSMUSG00000032612	Usp4	0.0409831	0.0167481	-0.154096	0.0212808	0.07375	0.13975	1	0
ENSMUSG00000030075	Cntn3	0.0410651	0.0272844	0.122732	0.0344942	0.50375	0.3805	1	0	SFARI					2	0
ENSMUSG00000061028	Clasrp	0.0411824	0.0375803	-0.222361	0.0465521	0.1065	0.18425	1	0
ENSMUSG00000055639	Dach1	0.041265	0.0411074	0.191098	0.0448182	0.51075	0.3885	1	0
ENSMUSG00000021495	Fam193b	0.0416241	0.0357131	-0.210601	0.0508064	0.086	0.15875	1	0
ENSMUSG00000043384	Gprasp1	0.0418462	0.0454988	0.13491	0.0717008	0.543	0.39125	1	0
ENSMUSG00000078591	Hs3st4	0.0422359	0.0446132	0.0850153	0.0197662	0.78375	0.683	1	0
ENSMUSG00000049184	Purg	0.0424287	0.056285	-0.200228	0.0441753	0.14375	0.242	1	0
ENSMUSG00000054263	Lifr	0.0427798	0.0195762	-0.194738	0.0365205	0.148	0.2285	1	0
ENSMUSG00000026959	Grin1	0.0430754	0.0249029	0.135114	0.0221134	0.59675	0.4895	1	0	SFARI					1	0
ENSMUSG00000039473	Ubn1	0.0431035	0.0144691	-0.146041	0.0210839	0.054	0.11175	1	0
ENSMUSG00000004892	Bcan	0.0432454	0.0361694	0.240768	0.0587892	0.67075	0.53625	1	0
ENSMUSG00000034164	Emid1	0.043804	0.0168264	-0.139258	0.0189986	0.359	0.45825	1	0
ENSMUSG00000022043	Trim35	0.0438875	0.0519017	-0.178596	0.0553742	0.07375	0.14525	1	0
ENSMUSG00000026491	Ahctf1	0.0445653	0.0309347	0.196815	0.0415872	0.18	0.101	1	0
ENSMUSG00000056673	Kdm5d	0.0447843	0.0318811	0.203562	0.0229909	0.2055	0.128	1	0
ENSMUSG00000025316	Banp	0.0448142	0.0215223	-0.134556	0.0189324	0.059	0.12075	1	0
ENSMUSG00000020900	Myh10	0.0450999	0.0288677	0.207431	0.0140072	0.129	0.06725	1	0	SFARI					2	0
ENSMUSG00000004980	Hnrnpa2b1	0.0454193	0.0293351	0.221092	0.0608604	0.84025	0.746	1	0
ENSMUSG00000002617	Zfp40	0.0455914	0.0650548	0.166641	0.0386669	0.137	0.06725	1	0
ENSMUSG00000100301	6030407O03Rik	0.0457995	0.0481985	-0.0980888	0.0237692	0.148	0.23675	1	0
ENSMUSG00000031760	Mt3	0.0464411	0.0262931	0.184668	0.0176368	0.12625	0.06575	1	0
ENSMUSG00000021549	Rasa1	0.0466755	0.0581457	-0.303593	0.0765045	0.21375	0.3105	1	0
ENSMUSG00000079056	Kcnip3	0.0467146	0.0480203	-0.215334	0.0529758	0.33475	0.45175	1	0
ENSMUSG00000032017	Grik4	0.0469629	0.0686365	-0.212807	0.0647022	0.34025	0.4585	1	0	SFARI					2	0
ENSMUSG00000036273	Lrrk2	0.0477161	0.0321416	0.112918	0.0274771	0.20275	0.12125	1	0
ENSMUSG00000024593	Megf10	0.0479878	0.0290739	-0.0970917	0.0250939	0.094	0.16775	1	0	SFARI					2	0
ENSMUSG00000019977	Hbs1l	0.0480411	0.0392106	-0.173528	0.0358926	0.08975	0.1625	1	0
ENSMUSG00000037697	Ddhd1	0.0484194	0.0292149	-0.13419	0.052393	0.29975	0.40575	1	0
ENSMUSG00000030854	Ptpn5	0.0484576	0.031607	0.242943	0.050653	0.231	0.14925	1	0
ENSMUSG00000070695	Cntnap5a	0.0487593	0.0467628	0.060388	0.0310029	0.47425	0.3575	1	0
ENSMUSG00000035530	Eif1	0.0488407	0.0374724	0.129083	0.0384601	0.148	0.078	1	0
ENSMUSG00000075318	Scn2a	0.048854	0.023265	0.123366	0.0158439	0.86	0.71475	1	0	SFARI;EAGLE;TADA	0	Definitive	109.3	Concordant	1	0
ENSMUSG00000028289	Epha7	0.0492021	0.0348601	0.0790969	0.0208798	0.46375	0.351	1	0
ENSMUSG00000019996	Map7	0.0495189	0.0315377	0.12827	0.0480666	0.46225	0.33075	1	0
ENSMUSG00000000600	Krit1	0.0495217	0.0477806	0.206395	0.0763877	0.44375	0.321	1	0
ENSMUSG00000025609	Mkln1	0.049575	0.0472006	-0.186738	0.0433162	0.23675	0.34275	1	0
ENSMUSG00000049119	Fam110b	0.0497722	0.0261559	-0.207643	0.0208794	0.191	0.28375	1	0

## Sheet: Pseudo-bulk
ensembl	gene	p_val.mean	p_val.std	avg_log2FC.mean	avg_log2FC.std	pct.1.mean	pct.2.mean	padj.mean	padj.std	ASD.status	TADA.FDR	EAGLE.annotation	EAGLE.score	EAGLE.concordance	SFARI.score	SFARI.syndromic
ENSMUSG00000026872	Zeb2	8.10479e-97	1.80193e-96	-0.778003	0.025998	0.2724	0.5088	2.45429e-92	5.45662e-92
ENSMUSG00000033981	Gria2	1.38037e-76	3.08661e-76	0.356756	0.0120499	0.9962	0.9942	4.18005e-72	9.34687e-72	SFARI;EAGLE;TADA	0.0666362	Definitive	12	Concordant	1	0
ENSMUSG00000019505	Ubb	1.82914e-71	2.31817e-71	0.407734	0.0119476	0.45	0.2584	5.53901e-67	7.01988e-67
ENSMUSG00000033740	St18	1.5146e-69	3.35574e-69	-0.901325	0.0284616	0.1598	0.342	4.58651e-65	1.01618e-64
ENSMUSG00000062078	Qk	4.75024e-69	1.05757e-68	-0.768317	0.0208671	0.5808	0.7202	1.43847e-64	3.20254e-64
ENSMUSG00000020719	Ddx5	1.04787e-66	2.34209e-66	0.332403	0.0120978	0.9648	0.941	3.17315e-62	7.09232e-62
ENSMUSG00000021268	Meg3	2.24763e-65	5.02584e-65	0.383964	0.0176281	0.9964	0.9936	6.80627e-61	1.52193e-60
ENSMUSG00000043456	Zfp536	2.54113e-65	5.67385e-65	-0.600685	0.0335745	0.1874	0.374	7.69506e-61	1.71815e-60
ENSMUSG00000025551	Fgf14	4.39806e-64	9.83107e-64	0.390328	0.0135846	0.9984	0.9954	1.33182e-59	2.97705e-59	SFARI					3	0
ENSMUSG00000034488	Edil3	3.65745e-62	7.97379e-62	-0.763929	0.0351002	0.474	0.6318	1.10755e-57	2.41462e-57
ENSMUSG00000038349	Plcl1	3.72458e-62	8.32842e-62	-0.897759	0.0404778	0.4792	0.6256	1.12788e-57	2.52201e-57
ENSMUSG00000032936	Camkv	2.58203e-60	4.24124e-60	0.410143	0.00493131	0.6354	0.5036	7.8189e-56	1.28433e-55
ENSMUSG00000041607	Mbp	2.94637e-60	6.56976e-60	-0.90523	0.0230684	0.2428	0.4072	8.92219e-56	1.98945e-55
ENSMUSG00000034751	Mast4	4.36673e-60	9.76338e-60	-0.716271	0.0304413	0.3176	0.4926	1.32233e-55	2.95655e-55
ENSMUSG00000032841	Prr5l	4.61508e-60	6.32864e-60	-0.644879	0.032782	0.092	0.2364	1.39754e-55	1.91644e-55
ENSMUSG00000031425	Plp1	1.12035e-57	2.47228e-57	-0.812206	0.0319623	0.2338	0.4126	3.39264e-53	7.48656e-53
ENSMUSG00000022548	Apod	9.61361e-57	2.14251e-56	-0.68646	0.0195181	0.1242	0.2742	2.91119e-52	6.48794e-52
ENSMUSG00000001270	Ckb	2.51422e-56	5.06806e-56	0.43173	0.0114081	0.7682	0.6818	7.61355e-52	1.53471e-51
ENSMUSG00000058740	Kcnt1	1.38289e-54	1.47838e-54	0.353632	0.0114167	0.507	0.34	4.18767e-50	4.47682e-50
ENSMUSG00000032517	Mobp	1.56308e-54	3.48042e-54	-0.533582	0.0218081	0.1106	0.2562	4.73331e-50	1.05394e-49
ENSMUSG00000049583	Grm5	1.76136e-54	3.93313e-54	0.373807	0.0131375	0.9892	0.9842	5.33375e-50	1.19103e-49	SFARI					2	0
ENSMUSG00000053477	Tcf4	8.70369e-54	1.48095e-53	-0.524942	0.00864684	0.4744	0.6416	2.63565e-49	4.48461e-49	SFARI;EAGLE;TADA	0.00271594	Definitive	13.5	Concordant	1	1
ENSMUSG00000022425	Enpp2	1.91852e-53	4.28938e-53	-0.594777	0.0275231	0.1474	0.3026	5.80966e-49	1.29891e-48
ENSMUSG00000035189	Ano4	2.26415e-53	5.05752e-53	-0.539914	0.0306414	0.2876	0.4618	6.85629e-49	1.53152e-48
ENSMUSG00000033569	Adgrb3	6.34978e-53	1.41983e-52	0.312926	0.0176513	0.995	0.9898	1.92284e-48	4.29953e-48
ENSMUSG00000015656	Hspa8	9.44811e-53	2.11129e-52	0.32872	0.0133243	0.4446	0.2724	2.86108e-48	6.3934e-48
ENSMUSG00000027419	Pcsk2	2.26584e-52	4.79386e-52	0.362828	0.00702914	0.933	0.9196	6.86141e-48	1.45168e-47
ENSMUSG00000026109	Tmeff2	2.68525e-50	4.35437e-50	-0.807005	0.0242753	0.7008	0.7898	8.13147e-46	1.31859e-45
ENSMUSG00000032554	Trf	4.37893e-50	7.04939e-50	-0.571657	0.0232156	0.1466	0.2966	1.32603e-45	2.1347e-45
ENSMUSG00000044340	Phlpp1	1.04788e-49	2.34156e-49	-0.669837	0.0336548	0.5388	0.6676	3.1732e-45	7.0907e-45
ENSMUSG00000030695	Aldoa	9.99071e-49	1.37656e-48	0.288418	0.0101911	0.3826	0.223	3.02539e-44	4.1685e-44
ENSMUSG00000036564	Ndrg4	3.05441e-48	6.82756e-48	0.343531	0.0116556	0.6844	0.5824	9.24935e-44	2.06752e-43
ENSMUSG00000026204	Ptprn	1.09333e-47	2.35607e-47	0.335384	0.00948548	0.7724	0.7062	3.31081e-43	7.13466e-43
ENSMUSG00000026223	Itm2c	1.08076e-46	2.31741e-46	0.302979	0.00675944	0.421	0.265	3.27274e-42	7.01757e-42
ENSMUSG00000076439	Mog	7.18561e-46	1.47856e-45	-0.408134	0.0128848	0.0876	0.2084	2.17595e-41	4.47738e-41
ENSMUSG00000045349	Sh2d5	1.87602e-44	4.13467e-44	0.274636	0.0058458	0.357	0.2142	5.68097e-40	1.25206e-39
ENSMUSG00000037996	Slc24a2	2.47079e-44	5.52484e-44	-0.627412	0.0156239	0.849	0.9052	7.48204e-40	1.67303e-39	SFARI					2	0
ENSMUSG00000027674	Pex5l	1.64279e-43	3.67332e-43	-0.525712	0.0324056	0.361	0.5186	4.97469e-39	1.11236e-38
ENSMUSG00000015143	Actn1	1.84578e-43	4.12105e-43	0.305745	0.00728285	0.474	0.3196	5.58938e-39	1.24794e-38
ENSMUSG00000032854	Ugt8a	2.2322e-43	3.27949e-43	-0.425209	0.0151719	0.0992	0.2202	6.75955e-39	9.93096e-39
ENSMUSG00000007783	Cpt1c	7.25188e-43	1.62138e-42	0.276532	0.00927239	0.5084	0.3512	2.19601e-38	4.90988e-38
ENSMUSG00000059921	Unc5c	9.41416e-43	2.07492e-42	-0.426623	0.0251326	0.6132	0.7494	2.8508e-38	6.28326e-38
ENSMUSG00000040003	Magi2	2.2188e-42	4.96133e-42	-0.472553	0.019927	0.9898	0.9954	6.71896e-38	1.50239e-37
ENSMUSG00000022489	Pde1b	3.96424e-42	8.6229e-42	0.312908	0.011758	0.4878	0.3394	1.20045e-37	2.61119e-37
ENSMUSG00000068696	Gpr88	4.04848e-42	8.66629e-42	0.322352	0.00653119	0.3902	0.2466	1.22596e-37	2.62432e-37
ENSMUSG00000027375	Mal	4.28097e-42	8.88428e-42	-0.385417	0.0136291	0.1002	0.2238	1.29636e-37	2.69034e-37
ENSMUSG00000001833	Septin7	4.5743e-42	1.02218e-41	-0.615735	0.0196073	0.5152	0.6342	1.38519e-37	3.09537e-37
ENSMUSG00000030020	Prickle2	1.22322e-41	2.59644e-41	-0.493544	0.0156094	0.6116	0.7268	3.70416e-37	7.86253e-37	SFARI					2	0
ENSMUSG00000028161	Ppp3ca	1.80563e-41	1.09179e-41	0.300768	0.00088214	0.982	0.98	5.46782e-37	3.30614e-37	SFARI					3	1
ENSMUSG00000002107	Celf2	2.73469e-41	5.80875e-41	0.35032	0.0156533	0.997	0.9946	8.2812e-37	1.75901e-36	SFARI					2	1
ENSMUSG00000052544	St6galnac3	4.58146e-41	7.52409e-41	-0.649327	0.0175191	0.4674	0.5848	1.38736e-36	2.27845e-36
ENSMUSG00000100826	Snhg14	5.99266e-41	1.33803e-40	0.255856	0.00834808	0.987	0.9862	1.8147e-36	4.05182e-36
ENSMUSG00000010086	Rnf112	6.39924e-41	1.42462e-40	0.270224	0.00531223	0.4002	0.2582	1.93782e-36	4.31403e-36
ENSMUSG00000054640	Slc8a1	8.23139e-41	1.63682e-40	-0.430373	0.0139818	0.4274	0.5748	2.49263e-36	4.95661e-36
ENSMUSG00000036777	Anln	2.88059e-40	5.95459e-40	-0.374231	0.0154347	0.057	0.1546	8.72302e-36	1.80317e-35
ENSMUSG00000004110	Cacna1e	4.95551e-40	9.92357e-40	0.273561	0.0151292	0.9212	0.8946	1.50063e-35	3.00506e-35	SFARI					1	0
ENSMUSG00000022199	Slc22a17	5.08399e-40	8.54259e-40	0.260875	0.0117679	0.5454	0.389	1.53953e-35	2.58687e-35
ENSMUSG00000019889	Ptprk	5.99141e-40	9.00165e-40	-0.458104	0.0157135	0.1426	0.265	1.81432e-35	2.72588e-35
ENSMUSG00000027238	Frmd5	1.87996e-39	4.12866e-39	-0.542313	0.0152332	0.7794	0.8402	5.69289e-35	1.25024e-34
ENSMUSG00000031714	Gab1	6.88679e-39	1.52878e-38	-0.381267	0.00983846	0.0896	0.1964	2.08546e-34	4.62945e-34
ENSMUSG00000036095	Dgkb	1.35434e-38	3.02751e-38	0.317536	0.0291473	0.9712	0.9568	4.1012e-34	9.16791e-34
ENSMUSG00000060882	Kcnd2	2.51674e-38	4.70527e-38	0.294831	0.0150043	0.9948	0.982	7.62119e-34	1.42485e-33	SFARI					2	0
ENSMUSG00000019943	Atp2b1	3.32633e-38	4.09238e-38	0.299741	0.00720152	0.9496	0.9348	1.00728e-33	1.23925e-33	SFARI					3	0
ENSMUSG00000052572	Dlg2	4.53039e-38	1.01267e-37	0.284256	0.0152172	0.9992	0.999	1.37189e-33	3.06657e-33	SFARI					2	0
ENSMUSG00000000632	Sez6	1.46448e-37	2.7563e-37	0.305494	0.0105424	0.4336	0.3	4.43474e-33	8.34663e-33
ENSMUSG00000040907	Atp1a3	1.71787e-37	3.70865e-37	0.269567	0.00602247	0.4552	0.3156	5.20204e-33	1.12305e-32	SFARI					2	1
ENSMUSG00000061718	Ppp1r1b	2.47772e-37	5.49995e-37	0.258764	0.00649579	0.344	0.2122	7.50302e-33	1.66549e-32	SFARI					2	0
ENSMUSG00000021087	Rtn1	2.48248e-37	5.53384e-37	0.259316	0.0116829	0.9272	0.9186	7.51745e-33	1.67576e-32
ENSMUSG00000055421	Pcdh9	3.15626e-37	5.94497e-37	-0.568436	0.0331372	0.9558	0.9614	9.5578e-33	1.80026e-32	SFARI					2	0
ENSMUSG00000020774	Aspa	3.4768e-37	7.77001e-37	-0.336628	0.0220125	0.064	0.1654	1.05284e-32	2.35291e-32
ENSMUSG00000035885	Cox8a	4.21847e-37	9.43253e-37	0.256016	0.0110111	0.3182	0.1856	1.27744e-32	2.85636e-32
ENSMUSG00000056966	Gjc3	6.1051e-37	1.02552e-36	-0.32185	0.0146924	0.0798	0.1808	1.84875e-32	3.10548e-32
ENSMUSG00000028033	Kcnq5	6.75792e-37	1.46871e-36	0.342621	0.0137619	0.9508	0.942	2.04643e-32	4.44754e-32
ENSMUSG00000004933	Matk	7.00714e-37	1.26298e-36	0.22609	0.0076562	0.3454	0.2156	2.1219e-32	3.82454e-32
ENSMUSG00000023868	Pde10a	1.0348e-36	2.29492e-36	0.347276	0.0199355	0.9738	0.9766	3.13358e-32	6.94947e-32
ENSMUSG00000030209	Grin2b	1.21332e-36	2.70394e-36	0.245206	0.0117312	0.987	0.9828	3.67416e-32	8.18806e-32	SFARI;EAGLE;TADA	2.49e-09	Definitive	29.65	Concordant	1	0
ENSMUSG00000036634	Mag	1.53714e-36	3.43575e-36	-0.392306	0.0241175	0.1184	0.239	4.65477e-32	1.04041e-31
ENSMUSG00000034818	Celf5	1.65314e-36	3.15674e-36	0.237657	0.0102869	0.3926	0.2566	5.00605e-32	9.55924e-32
ENSMUSG00000032174	Icam5	1.68674e-36	2.84302e-36	0.222242	0.0057288	0.296	0.1734	5.10778e-32	8.60924e-32
ENSMUSG00000090223	Pcp4	3.64321e-36	7.47064e-36	0.313991	0.0101891	0.3822	0.2524	1.10324e-31	2.26226e-31
ENSMUSG00000022840	Adcy5	4.02438e-36	4.76459e-36	0.315213	0.00721985	0.8116	0.7826	1.21866e-31	1.44281e-31	SFARI					2	0
ENSMUSG00000003273	Car11	6.05105e-36	1.34494e-35	0.231797	0.00699982	0.3756	0.2384	1.83238e-31	4.07276e-31
ENSMUSG00000037625	Cldn11	1.30493e-35	2.32299e-35	-0.339303	0.0121364	0.1012	0.2088	3.95158e-31	7.03448e-31
ENSMUSG00000075415	Fnbp1	1.45038e-35	2.63505e-35	-0.53128	0.0260221	0.2922	0.4142	4.39205e-31	7.97945e-31
ENSMUSG00000040794	C1qtnf4	1.47518e-35	1.0472e-35	0.247157	0.00418403	0.405	0.2754	4.46715e-31	3.17112e-31
ENSMUSG00000004267	Eno2	1.85603e-35	2.21729e-35	0.208949	0.00833915	0.325	0.1992	5.62042e-31	6.7144e-31
ENSMUSG00000060988	Galnt13	1.99255e-35	4.36659e-35	0.254813	0.0144462	0.953	0.9314	6.03383e-31	1.32229e-30	SFARI					2	0
ENSMUSG00000050840	Cdh20	2.38068e-35	5.32286e-35	-0.4651	0.0240631	0.1338	0.2508	7.20919e-31	1.61187e-30
ENSMUSG00000062991	Nrg1	2.49698e-35	5.40257e-35	0.319925	0.0139079	0.96	0.938	7.56134e-31	1.63601e-30
ENSMUSG00000034730	Adgrb1	4.55462e-35	5.69521e-35	0.248881	0.00494677	0.442	0.3068	1.37923e-30	1.72462e-30
ENSMUSG00000044667	Plppr4	7.6963e-35	1.55464e-34	0.286264	0.00764692	0.7584	0.7124	2.33059e-30	4.70775e-30
ENSMUSG00000068205	Macrod2	1.51394e-34	3.37988e-34	0.248767	0.0180659	0.9962	0.9926	4.58452e-30	1.0235e-29	SFARI					2	0
ENSMUSG00000028176	Lrrc7	2.92554e-34	3.88701e-34	0.25051	0.0108378	0.9882	0.9838	8.85913e-30	1.17706e-29
ENSMUSG00000030428	Ttyh1	3.23598e-34	3.83397e-34	0.258612	0.00468746	0.4384	0.3056	9.79919e-30	1.161e-29
ENSMUSG00000023923	Tbc1d5	6.03661e-34	1.20379e-33	-0.40771	0.0232303	0.6828	0.775	1.82801e-29	3.6453e-29	SFARI					2	0
ENSMUSG00000049422	Chchd10	6.1827e-34	9.31281e-34	0.217296	0.00672578	0.246	0.1348	1.87224e-29	2.82011e-29
ENSMUSG00000038608	Dock10	6.45535e-34	1.4356e-33	-0.512016	0.0179849	0.5626	0.6624	1.95481e-29	4.3473e-29
ENSMUSG00000035202	Lars2	7.4843e-34	1.66948e-33	0.26603	0.00511961	0.49	0.3518	2.26639e-29	5.05552e-29
ENSMUSG00000026748	Plxdc2	9.92878e-34	2.19601e-33	-0.547503	0.018439	0.322	0.4402	3.00663e-29	6.64997e-29
ENSMUSG00000019039	Dalrd3	1.06769e-33	2.38409e-33	0.266653	0.00935498	0.4896	0.3522	3.23319e-29	7.21949e-29
ENSMUSG00000105265	Sox2ot	2.24656e-33	5.02342e-33	-0.418364	0.0435131	0.3892	0.5368	6.80302e-29	1.52119e-28
ENSMUSG00000027199	Gatm	2.85717e-33	4.03448e-33	-0.309191	0.00941811	0.0942	0.1946	8.65207e-29	1.22172e-28	SFARI						1
ENSMUSG00000022748	Cmss1	3.39007e-33	7.0782e-33	0.291477	0.00936837	0.8814	0.876	1.02658e-28	2.14342e-28
ENSMUSG00000040037	Negr1	3.43519e-33	7.65279e-33	0.241768	0.00999747	0.9902	0.9864	1.04024e-28	2.31742e-28	SFARI					2	0
ENSMUSG00000092341	Malat1	6.38884e-33	1.41721e-32	-0.195641	0.0103562	1	1	1.93467e-28	4.29159e-28
ENSMUSG00000028677	Rnf220	7.87848e-33	1.76163e-32	-0.640835	0.0275897	0.216	0.3326	2.38576e-28	5.33458e-28
ENSMUSG00000059456	Ptk2b	1.09579e-32	2.4493e-32	0.243746	0.00820524	0.44	0.2994	3.31827e-28	7.41696e-28
ENSMUSG00000015090	Ptgds	1.15695e-32	2.58694e-32	-0.729985	0.0526566	0.105	0.2148	3.50347e-28	7.83376e-28
ENSMUSG00000052372	Il1rapl1	1.36905e-32	3.01419e-32	0.248491	0.00684232	0.993	0.9934	4.14576e-28	9.12758e-28	SFARI					2	0
ENSMUSG00000025584	Pde8a	1.37155e-32	2.32125e-32	-0.315629	0.013265	0.0824	0.1782	4.15332e-28	7.02922e-28
ENSMUSG00000039539	Sgcz	1.4879e-32	3.3264e-32	0.359578	0.0195481	0.9636	0.96	4.50565e-28	1.0073e-27
ENSMUSG00000100147	1700047M11Rik	2.88127e-32	6.14422e-32	-0.328125	0.00990397	0.1022	0.2094	8.72507e-28	1.86059e-27
ENSMUSG00000021991	Cacna2d3	4.70248e-32	9.78599e-32	0.298383	0.0103289	0.9436	0.9366	1.424e-27	2.96339e-27	SFARI;EAGLE		Limited	3.75	Discordant	1	0
ENSMUSG00000057897	Camk2b	4.98755e-32	3.66078e-32	0.252577	0.00990246	0.7654	0.7234	1.51033e-27	1.10856e-27	SFARI						1
ENSMUSG00000030854	Ptpn5	5.16337e-32	7.86153e-32	0.285555	0.0166223	0.6626	0.5746	1.56357e-27	2.38063e-27
ENSMUSG00000023944	Hsp90ab1	8.71149e-32	1.48947e-31	0.251827	0.0166935	0.5078	0.3718	2.63801e-27	4.51041e-27
ENSMUSG00000057666	Gapdh	1.08458e-31	2.32196e-31	0.247719	0.0101422	0.3972	0.2688	3.28433e-27	7.03136e-27
ENSMUSG00000097451	Rian	1.178e-31	2.45168e-31	0.221308	0.0145918	0.9752	0.9744	3.56722e-27	7.42416e-27
ENSMUSG00000089941	Gm16168	1.17996e-31	2.63748e-31	-0.398522	0.0136659	0.0886	0.186	3.57317e-27	7.98682e-27
ENSMUSG00000040265	Dnm3	1.27174e-31	2.8437e-31	-0.344298	0.018448	0.7742	0.8584	3.85109e-27	8.61128e-27
ENSMUSG00000107872	Gm44511	1.83867e-31	3.87052e-31	0.223653	0.00927654	0.48	0.348	5.56787e-27	1.17207e-26
ENSMUSG00000028525	Pde4b	1.85675e-31	3.63595e-31	-0.649647	0.0139116	0.847	0.8656	5.6226e-27	1.10104e-26
ENSMUSG00000025221	Kcnip2	2.59783e-31	5.65313e-31	0.238989	0.0109349	0.4	0.2728	7.86674e-27	1.71188e-26
ENSMUSG00000097391	Mirg	5.61268e-31	7.16672e-31	0.278183	0.0135215	0.672	0.6098	1.69963e-26	2.17023e-26
ENSMUSG00000033307	Mif	6.05542e-31	1.10017e-30	0.165627	0.00690682	0.1816	0.0884	1.8337e-26	3.33153e-26
ENSMUSG00000017740	Slc12a5	9.90588e-31	2.21402e-30	0.2201	0.0104085	0.3664	0.241	2.9997e-26	6.70451e-26	SFARI					2	0
ENSMUSG00000028137	Celf3	1.28538e-30	1.89153e-30	0.173292	0.00719833	0.264	0.1526	3.89239e-26	5.72793e-26
ENSMUSG00000027210	Meis2	2.08879e-30	2.03827e-30	0.231025	0.00759468	0.8828	0.8486	6.32526e-26	6.17229e-26	SFARI;EAGLE;TADA	0.00517313	Moderate	7.5	Discordant	1	1
ENSMUSG00000008575	Nfib	2.33732e-30	3.27306e-30	-0.268035	0.0195286	0.2466	0.3848	7.07788e-26	9.91149e-26	SFARI					2	1
ENSMUSG00000031906	Smpd3	4.56917e-30	1.01707e-29	0.246708	0.0099621	0.4794	0.347	1.38364e-25	3.0799e-25
ENSMUSG00000029713	Gnb2	4.59752e-30	9.07315e-30	0.202201	0.00736447	0.3196	0.2012	1.39222e-25	2.74753e-25	SFARI						1
ENSMUSG00000031428	Zcchc18	7.24854e-30	1.43443e-29	0.242916	0.00554597	0.4114	0.2952	2.195e-25	4.34375e-25
ENSMUSG00000028833	Ncdn	8.54698e-30	1.90977e-29	0.188852	0.0102831	0.2514	0.1422	2.5882e-25	5.78315e-25
ENSMUSG00000029088	Kcnip4	8.65269e-30	1.19401e-29	0.207565	0.0120696	0.982	0.971	2.62021e-25	3.61569e-25
ENSMUSG00000039913	Pak5	1.50456e-29	3.36419e-29	-0.410954	0.0195629	0.5024	0.6258	4.5561e-25	1.01874e-24
ENSMUSG00000019996	Map7	1.92457e-29	4.2801e-29	-0.45665	0.0272911	0.5514	0.6516	5.828e-25	1.2961e-24
ENSMUSG00000032087	Dscaml1	2.33153e-29	5.21258e-29	-0.315152	0.014187	0.5414	0.669	7.06035e-25	1.57847e-24
ENSMUSG00000056755	Grm7	2.36848e-29	3.36905e-29	0.24083	0.0047173	0.9584	0.9414	7.17222e-25	1.02021e-24	SFARI					2	0
ENSMUSG00000040785	Ttc3	2.72959e-29	3.42199e-29	0.193828	0.00429127	0.9588	0.954	8.26574e-25	1.03625e-24
ENSMUSG00000032826	Ank2	3.65944e-29	4.90345e-29	-0.27597	0.0164599	0.9724	0.9838	1.10815e-24	1.48486e-24	SFARI;EAGLE;TADA	0.00174365	Moderate	10.8	Discordant	1	0
ENSMUSG00000091712	Sec14l5	4.22931e-29	9.21603e-29	-0.297793	0.0186349	0.099	0.1922	1.28072e-24	2.7908e-24
ENSMUSG00000110710	C78859	4.74534e-29	9.16568e-29	0.247027	0.0090938	0.4958	0.3702	1.43698e-24	2.77555e-24
ENSMUSG00000098243	Gm4258	7.64154e-29	1.57725e-28	-0.363456	0.00562531	0.2508	0.3592	2.31401e-24	4.77621e-24
ENSMUSG00000063887	Nlgn1	7.96578e-29	1.52243e-28	0.272339	0.00912861	0.9762	0.9666	2.4122e-24	4.61023e-24	SFARI					2	0
ENSMUSG00000033579	Fa2h	9.43505e-29	1.25721e-28	-0.209231	0.00955664	0.0614	0.141	2.85712e-24	3.8071e-24
ENSMUSG00000039419	Cntnap2	1.42409e-28	2.94303e-28	0.237625	0.015795	0.99	0.9876	4.31242e-24	8.91208e-24	SFARI;EAGLE		Refuted	—	Discordant	2	1
ENSMUSG00000026259	Ngef	1.53102e-28	3.40254e-28	0.218378	0.00810582	0.4116	0.2874	4.63622e-24	1.03036e-23
ENSMUSG00000041351	Rap1gap	1.62911e-28	3.6404e-28	0.239203	0.00849864	0.4708	0.343	4.93327e-24	1.10239e-23
ENSMUSG00000032503	Arpp21	1.67069e-28	3.73513e-28	0.230497	0.00788356	0.915	0.891	5.05917e-24	1.13107e-23
ENSMUSG00000060371	Caln1	2.11219e-28	2.95218e-28	0.244764	0.0142468	0.9028	0.8818	6.39613e-24	8.9398e-24
ENSMUSG00000025422	Agap2	2.42527e-28	3.24072e-28	0.166283	0.00458145	0.2614	0.1568	7.3442e-24	9.81354e-24	SFARI					2	0
ENSMUSG00000049807	Arhgap23	2.79387e-28	5.48712e-28	-0.375059	0.0236837	0.1534	0.2564	8.4604e-24	1.66161e-23
ENSMUSG00000054871	Tmem158	2.89322e-28	6.296e-28	0.18568	0.00353989	0.2696	0.1632	8.76124e-24	1.90655e-23
ENSMUSG00000013033	Adgrl1	3.28491e-28	7.34522e-28	0.235871	0.0145419	0.4112	0.2898	9.94735e-24	2.22428e-23	SFARI						1
ENSMUSG00000044349	Snhg11	4.60305e-28	9.97498e-28	0.220131	0.0134301	0.9908	0.9886	1.3939e-23	3.02062e-23
ENSMUSG00000033161	Atp1a1	4.73107e-28	8.88893e-28	0.17658	0.00760155	0.3338	0.2144	1.43266e-23	2.69174e-23	SFARI					2	1
ENSMUSG00000036427	Gpi1	8.29465e-28	1.75312e-27	0.199542	0.0102207	0.3608	0.244	2.51179e-23	5.3088e-23
ENSMUSG00000013523	Bcas1	9.23162e-28	2.04962e-27	-0.256646	0.0149563	0.059	0.1384	2.79552e-23	6.20667e-23	SFARI					2	0
ENSMUSG00000024261	Syt4	9.40622e-28	1.2132e-27	0.19492	0.0087392	0.2894	0.1824	2.84839e-23	3.67383e-23
ENSMUSG00000035653	Lrfn5	1.0056e-27	2.17455e-27	0.229017	0.00923858	0.9606	0.9538	3.04515e-23	6.58498e-23	SFARI					2	0
ENSMUSG00000041986	Elmod1	1.20586e-27	2.36945e-27	0.246894	0.00748969	0.8194	0.8036	3.65159e-23	7.17516e-23
ENSMUSG00000034156	Tspoap1	1.34211e-27	3.00105e-27	0.21341	0.0121774	0.4138	0.2878	4.06418e-23	9.08777e-23	SFARI					2	0
ENSMUSG00000038418	Egr1	1.5756e-27	2.97447e-27	0.171726	0.00204783	0.1822	0.0946	4.77123e-23	9.00728e-23
ENSMUSG00000045573	Penk	2.25957e-27	5.03612e-27	0.569541	0.0154217	0.3848	0.274	6.84243e-23	1.52504e-22
ENSMUSG00000062044	Lmtk3	2.87136e-27	6.19851e-27	0.166232	0.00659553	0.2756	0.1686	8.69505e-23	1.87703e-22	SFARI					3	0
ENSMUSG00000024121	Atp6v0c	2.89322e-27	6.30103e-27	0.21883	0.00436925	0.4774	0.3514	8.76124e-23	1.90808e-22
ENSMUSG00000027858	Tspan2	3.39479e-27	7.24173e-27	-0.239087	0.00773451	0.0676	0.1492	1.02801e-22	2.19294e-22
ENSMUSG00000037703	Lzts3	3.6048e-27	4.97258e-27	0.186112	0.0101617	0.2954	0.1862	1.09161e-22	1.5058e-22
ENSMUSG00000022636	Alcam	3.75358e-27	8.18185e-27	0.249804	0.00951456	0.922	0.9168	1.13666e-22	2.47763e-22
ENSMUSG00000037386	Rims2	7.81719e-27	1.33623e-26	0.18853	0.00720349	0.994	0.9944	2.3672e-22	4.04637e-22	SFARI					3	1
ENSMUSG00000032946	Rasgrp2	1.15024e-26	2.5607e-26	0.194685	0.00540149	0.2978	0.1902	3.48316e-22	7.75431e-22
ENSMUSG00000025151	Maged1	1.34342e-26	2.686e-26	0.202935	0.0146062	0.369	0.2498	4.06813e-22	8.13373e-22
ENSMUSG00000071528	Atp5md	1.90752e-26	2.42211e-26	0.169441	0.00519047	0.2098	0.1186	5.77637e-22	7.33463e-22
ENSMUSG00000006930	Hap1	1.96302e-26	4.37995e-26	0.174861	0.00605298	0.1966	0.1052	5.94442e-22	1.32634e-21
ENSMUSG00000040415	Dtx3	2.59422e-26	3.95155e-26	0.18576	0.00777389	0.3428	0.2322	7.85582e-22	1.19661e-21
ENSMUSG00000040860	Crocc	3.22517e-26	6.81029e-26	0.184213	0.012009	0.2822	0.1724	9.76647e-22	2.06229e-21
ENSMUSG00000039278	Pcsk1n	3.89356e-26	7.29738e-26	0.223425	0.00738683	0.4712	0.348	1.17905e-21	2.20979e-21
ENSMUSG00000062209	Erbb4	4.67498e-26	1.01323e-25	-0.355316	0.0241173	0.5794	0.7014	1.41568e-21	3.06825e-21
ENSMUSG00000025279	Dnase1l3	6.23464e-26	1.39183e-25	0.216122	0.0118269	0.1578	0.0756	1.88797e-21	4.21475e-21
ENSMUSG00000058297	Spock2	9.99857e-26	2.23546e-25	0.191173	0.00901069	0.318	0.206	3.02777e-21	6.76941e-21
ENSMUSG00000025372	Baiap2	1.12391e-25	2.51108e-25	0.269194	0.00991324	0.6828	0.6188	3.40344e-21	7.60404e-21
ENSMUSG00000040412	Elapor1	1.25729e-25	2.33493e-25	0.223473	0.0122725	0.4794	0.3604	3.80733e-21	7.07062e-21
ENSMUSG00000042350	Arel1	2.46364e-25	4.20843e-25	0.201397	0.0100876	0.3946	0.28	7.46039e-21	1.2744e-20
ENSMUSG00000061762	Tac1	2.9101e-25	4.63334e-25	0.329526	0.0052001	0.2838	0.184	8.81236e-21	1.40307e-20
ENSMUSG00000042700	Sipa1l1	3.0847e-25	4.74214e-25	0.188633	0.0065464	0.9222	0.9174	9.34109e-21	1.43601e-20
ENSMUSG00000022307	Oxr1	3.91813e-25	8.7488e-25	-0.327139	0.015289	0.5378	0.6682	1.18649e-20	2.64931e-20
ENSMUSG00000055026	Gabrg3	4.01804e-25	7.77969e-25	0.218464	0.0129832	0.959	0.9478	1.21674e-20	2.35584e-20	SFARI					2	0
ENSMUSG00000092274	Neat1	4.71818e-25	9.34403e-25	-0.331218	0.0113145	0.0946	0.1778	1.42876e-20	2.82956e-20
ENSMUSG00000031778	Cx3cl1	4.77955e-25	1.04846e-24	0.189767	0.00698803	0.3112	0.206	1.44734e-20	3.17494e-20
ENSMUSG00000031442	Mcf2l	4.97596e-25	1.0285e-24	0.21752	0.00581405	0.3846	0.2752	1.50682e-20	3.11452e-20
ENSMUSG00000061518	Cox5b	5.69761e-25	9.64766e-25	0.161917	0.00490204	0.2202	0.1274	1.72535e-20	2.9215e-20
ENSMUSG00000021910	Nisch	6.84285e-25	1.30895e-24	0.194853	0.00854504	0.5604	0.4412	2.07215e-20	3.96377e-20
ENSMUSG00000016319	Slc25a5	1.31412e-24	2.63848e-24	0.160681	0.00473162	0.2114	0.1232	3.97941e-20	7.98984e-20
ENSMUSG00000062825	Actg1	1.71796e-24	3.13635e-24	0.161481	0.0102289	0.2666	0.1628	5.20234e-20	9.49751e-20
ENSMUSG00000025468	Caly	2.23543e-24	4.30728e-24	0.173015	0.00603931	0.2836	0.1826	6.76933e-20	1.30433e-19
ENSMUSG00000039145	Camk1d	2.54592e-24	4.87866e-24	0.202991	0.00663504	0.957	0.9546	7.70956e-20	1.47736e-19
ENSMUSG00000102252	Snrpn	2.81635e-24	5.55465e-24	0.205896	0.0060348	0.4986	0.3852	8.52846e-20	1.68206e-19
ENSMUSG00000030102	Itpr1	3.01965e-24	6.43284e-24	0.234204	0.00936778	0.8614	0.855	9.14411e-20	1.94799e-19	SFARI					2	0
ENSMUSG00000021709	Erbin	3.87827e-24	3.63818e-24	-0.401535	0.020446	0.405	0.4894	1.17442e-19	1.10171e-19	SFARI					2	0
ENSMUSG00000029054	Gabrd	3.95251e-24	7.79282e-24	0.169939	0.0122478	0.2878	0.1826	1.1969e-19	2.35982e-19
ENSMUSG00000026987	Baz2b	4.40797e-24	6.66884e-24	-0.30927	0.0116382	0.5896	0.6856	1.33482e-19	2.01946e-19	SFARI;EAGLE		Moderate	7.35	Discordant	1	0
ENSMUSG00000030616	Sytl2	4.8496e-24	1.05362e-23	-0.244416	0.00952267	0.0724	0.1486	1.46856e-19	3.19057e-19
ENSMUSG00000055013	Agap1	5.47129e-24	1.2234e-23	-0.297959	0.0162443	0.6146	0.7122	1.65681e-19	3.70469e-19	SFARI					2	0
ENSMUSG00000045962	Wnk1	6.107e-24	1.32321e-23	-0.303764	0.0147032	0.6232	0.7154	1.84932e-19	4.00695e-19
ENSMUSG00000022514	Il1rap	7.45093e-24	1.57379e-23	-0.31953	0.0124637	0.1522	0.2422	2.25629e-19	4.76574e-19
ENSMUSG00000027624	Epb41l1	7.46964e-24	1.58454e-23	0.208813	0.01135	0.4884	0.3742	2.26196e-19	4.79831e-19
ENSMUSG00000021198	Unc79	1.68171e-23	3.75543e-23	0.190177	0.0111667	0.924	0.938	5.09257e-19	1.13722e-18	SFARI					2	0
ENSMUSG00000056553	Ptprn2	1.69752e-23	2.66157e-23	0.193178	0.00896844	0.9448	0.9538	5.14044e-19	8.05977e-19
ENSMUSG00000007892	Rplp1	1.88944e-23	4.12428e-23	0.182933	0.0138244	0.328	0.2164	5.7216e-19	1.24891e-18
ENSMUSG00000022564	Grina	2.53524e-23	5.3589e-23	0.183082	0.00541826	0.3568	0.2488	7.67722e-19	1.62278e-18
ENSMUSG00000048537	Phldb1	2.55997e-23	2.30988e-23	-0.241459	0.00940068	0.093	0.1716	7.75209e-19	6.99479e-19
ENSMUSG00000034675	Dbn1	2.91067e-23	4.54042e-23	0.160395	0.00668355	0.2912	0.1906	8.8141e-19	1.37493e-18
ENSMUSG00000063511	Snrnp70	3.31246e-23	7.15411e-23	0.174609	0.00660122	0.8822	0.8652	1.00308e-18	2.16641e-18
ENSMUSG00000023026	Dip2b	3.35466e-23	5.1317e-23	-0.282901	0.019542	0.5126	0.6166	1.01586e-18	1.55398e-18
ENSMUSG00000026576	Atp1b1	3.48594e-23	7.28315e-23	0.227434	0.00645162	0.7706	0.746	1.05561e-18	2.20548e-18
ENSMUSG00000041377	Ninj2	3.98418e-23	6.18038e-23	-0.181392	0.00982635	0.0454	0.1086	1.20649e-18	1.87154e-18
ENSMUSG00000029223	Uchl1	4.17736e-23	6.17245e-23	0.159259	0.0112774	0.272	0.172	1.26499e-18	1.86914e-18
ENSMUSG00000098973	Mir6236	4.33874e-23	8.5838e-23	0.276094	0.0101559	0.8982	0.8908	1.31386e-18	2.59935e-18
ENSMUSG00000006576	Slc4a3	4.85145e-23	6.87452e-23	0.195439	0.0113256	0.3476	0.2428	1.46912e-18	2.08174e-18
ENSMUSG00000027134	Lpcat4	4.88806e-23	7.86092e-23	0.122761	0.0039392	0.1764	0.096	1.4802e-18	2.38044e-18
ENSMUSG00000061904	Slc25a3	5.70571e-23	1.2476e-22	0.246342	0.0154135	0.5862	0.4934	1.7278e-18	3.77799e-18
ENSMUSG00000018770	Atp5g3	7.08196e-23	9.39047e-23	0.135451	0.00459858	0.196	0.112	2.14456e-18	2.84362e-18
ENSMUSG00000018474	Chd3	9.7441e-23	1.77604e-22	0.179985	0.00644901	0.2898	0.1892	2.95071e-18	5.37821e-18	SFARI					1	1
ENSMUSG00000046364	Rpl27a	9.96802e-23	1.46528e-22	0.115592	0.00213656	0.1426	0.0704	3.01852e-18	4.43715e-18
ENSMUSG00000033769	Exoc6b	1.02196e-22	1.77419e-22	-0.297096	0.0219295	0.7118	0.791	3.09469e-18	5.3726e-18	SFARI					2	0
ENSMUSG00000050272	Dscam	1.09034e-22	1.97984e-22	-0.203795	0.0126773	0.377	0.5152	3.30177e-18	5.99535e-18	SFARI;EAGLE		Definitive	13.5	Concordant	1	0
ENSMUSG00000033713	Foxn3	1.59016e-22	2.09723e-22	-0.331962	0.0106809	0.2466	0.3386	4.81534e-18	6.35083e-18
ENSMUSG00000004961	Syt5	1.7319e-22	3.78802e-22	0.146183	0.00784486	0.1982	0.113	5.24453e-18	1.14709e-17
ENSMUSG00000040624	Plekhg1	1.92045e-22	4.18125e-22	-0.222862	0.0123539	0.0674	0.1398	5.81551e-18	1.26617e-17
ENSMUSG00000034686	Prr7	2.0418e-22	2.63617e-22	0.12669	0.00679191	0.1728	0.0948	6.18299e-18	7.98284e-18
ENSMUSG00000029657	Hsph1	2.24342e-22	2.61458e-22	0.145967	0.0054956	0.2598	0.1656	6.79354e-18	7.91747e-18
ENSMUSG00000003363	Pld3	2.72464e-22	6.09003e-22	0.17487	0.00880024	0.3196	0.214	8.25076e-18	1.84418e-17
ENSMUSG00000024008	Cpne5	3.15524e-22	6.95519e-22	0.177586	0.00546437	0.3788	0.268	9.55469e-18	2.10617e-17
ENSMUSG00000035530	Eif1	3.47693e-22	6.41463e-22	0.174428	0.00853749	0.326	0.2226	1.05288e-17	1.94248e-17
ENSMUSG00000050121	Opalin	3.64052e-22	8.12881e-22	-0.224391	0.0170593	0.0572	0.129	1.10242e-17	2.46157e-17
ENSMUSG00000030122	Ptms	4.0103e-22	5.52457e-22	0.143257	0.0060871	0.2186	0.1326	1.2144e-17	1.67295e-17
ENSMUSG00000022577	Ly6h	5.03471e-22	1.06573e-21	0.202413	0.0145585	0.3374	0.2328	1.52461e-17	3.22723e-17
ENSMUSG00000001986	Gria3	5.14615e-22	9.61927e-22	0.171481	0.00309787	0.9176	0.9154	1.55836e-17	2.91291e-17	SFARI						1
ENSMUSG00000060716	Plekhh1	5.1537e-22	1.1483e-21	-0.208957	0.00864588	0.0696	0.14	1.56064e-17	3.47727e-17
ENSMUSG00000031517	Gpm6a	5.37574e-22	1.12737e-21	0.183294	0.00763617	0.8964	0.9	1.62788e-17	3.41391e-17
ENSMUSG00000048240	Gng7	5.56778e-22	1.15824e-21	0.201978	0.00782735	0.51	0.3914	1.68603e-17	3.50738e-17
ENSMUSG00000060534	Dcc	7.93007e-22	1.7493e-21	0.218327	0.00603337	0.9494	0.9434	2.40138e-17	5.29724e-17	SFARI					2	0
ENSMUSG00000057378	Ryr3	8.9346e-22	1.99582e-21	0.199788	0.0212646	0.9122	0.8822	2.70558e-17	6.04375e-17
ENSMUSG00000074776	Gm10754	9.16203e-22	1.35045e-21	0.252108	0.0132576	0.7532	0.7166	2.77445e-17	4.08943e-17
ENSMUSG00000016346	Kcnq2	1.02868e-21	2.23513e-21	0.176315	0.0070307	0.356	0.2532	3.11504e-17	6.76842e-17	SFARI					2	0
ENSMUSG00000034892	Rps29	1.08148e-21	2.41403e-21	0.154549	0.00747752	0.2334	0.1398	3.27493e-17	7.31017e-17
ENSMUSG00000032228	Tcf12	1.08841e-21	1.88337e-21	-0.299984	0.0243815	0.7058	0.7904	3.29592e-17	5.70323e-17
ENSMUSG00000036053	Fmnl2	1.25435e-21	1.84676e-21	-0.33007	0.0145314	0.2348	0.3278	3.79844e-17	5.59237e-17
ENSMUSG00000055839	Elob	1.35224e-21	2.66604e-21	0.147393	0.00873954	0.191	0.1078	4.09486e-17	8.07329e-17
ENSMUSG00000026575	Nme7	1.47082e-21	1.23641e-21	0.171643	0.0035457	0.3454	0.246	4.45393e-17	3.7441e-17
ENSMUSG00000020886	Dlg4	1.7291e-21	1.869e-21	0.157029	0.0043982	0.297	0.2022	5.23606e-17	5.6597e-17	SFARI;EAGLE;TADA	0.0100835	Limited	2.45	Discordant	1	0
ENSMUSG00000033510	Otud7a	1.81762e-21	2.43721e-21	-0.175622	0.00492949	0.706	0.8206	5.50412e-17	7.38036e-17	SFARI					2	0
ENSMUSG00000028565	Nfia	2.12502e-21	3.51054e-21	-0.336818	0.0259843	0.1608	0.251	6.435e-17	1.06306e-16	SFARI					2	0
ENSMUSG00000024830	Rps6kb2	2.23032e-21	3.00579e-21	0.147909	0.00468587	0.2768	0.1808	6.75385e-17	9.10212e-17
ENSMUSG00000026207	Speg	2.32087e-21	4.4854e-21	0.178634	0.00796432	0.3294	0.2294	7.02807e-17	1.35827e-16
ENSMUSG00000033676	Gabrb3	2.44997e-21	2.86973e-21	0.168173	0.00686744	0.9678	0.9706	7.41899e-17	8.69012e-17	SFARI					1	0
ENSMUSG00000037148	Arhgap10	2.73116e-21	5.28029e-21	0.191432	0.0102761	0.4538	0.3408	8.2705e-17	1.59898e-16
ENSMUSG00000005871	Apc	3.12559e-21	5.91271e-21	-0.192543	0.00600772	0.6928	0.7936	9.4649e-17	1.79049e-16
ENSMUSG00000030994	D7Ertd443e	4.27425e-21	4.5887e-21	-0.37288	0.0148516	0.1754	0.2552	1.29433e-16	1.38955e-16
ENSMUSG00000020599	Rgs9	4.43494e-21	8.47652e-21	0.234671	0.00940311	0.7422	0.7004	1.34299e-16	2.56686e-16
ENSMUSG00000028785	Hpca	4.75686e-21	8.55925e-21	0.170844	0.00528594	0.2708	0.1788	1.44047e-16	2.59191e-16
ENSMUSG00000039001	Rps21	5.12519e-21	6.42758e-21	0.141943	0.010445	0.2102	0.1244	1.55201e-16	1.9464e-16
ENSMUSG00000042750	Bex2	6.13574e-21	1.24012e-20	0.123823	0.00338119	0.1724	0.096	1.85802e-16	3.75533e-16
ENSMUSG00000024780	Cdc37l1	6.69586e-21	7.70629e-21	-0.358379	0.0107696	0.2704	0.3524	2.02764e-16	2.33362e-16
ENSMUSG00000067889	Sptbn2	7.49797e-21	1.6725e-20	0.188863	0.0110861	0.3362	0.2358	2.27054e-16	5.06467e-16
ENSMUSG00000041697	Cox6a1	7.91579e-21	1.04811e-20	0.194754	0.00665879	0.3002	0.2048	2.39706e-16	3.17388e-16
ENSMUSG00000039904	Gpr37	7.96001e-21	1.23013e-20	-0.128564	0.00483908	0.0444	0.1022	2.41045e-16	3.72509e-16	SFARI					2	0
ENSMUSG00000024597	Slc12a2	9.47758e-21	1.27214e-20	-0.328023	0.0109032	0.1994	0.2842	2.87e-16	3.85229e-16
ENSMUSG00000052889	Prkcb	9.60205e-21	2.12407e-20	0.206982	0.0162732	0.9326	0.931	2.90769e-16	6.43211e-16	SFARI					2	0
ENSMUSG00000022752	Tomm70a	9.83208e-21	1.79232e-20	0.180323	0.00631564	0.3826	0.2814	2.97735e-16	5.42751e-16
ENSMUSG00000030774	Pak1	1.05187e-20	1.85513e-20	-0.3793	0.0150524	0.2234	0.3102	3.18528e-16	5.61769e-16	SFARI						1
ENSMUSG00000023800	Tiam2	1.2756e-20	2.83203e-20	0.178308	0.01109	0.3652	0.2604	3.86276e-16	8.57595e-16
ENSMUSG00000055109	Gm15155	1.28718e-20	1.8043e-20	0.281036	0.00934243	0.5162	0.4346	3.89784e-16	5.46378e-16	SFARI;EAGLE		Definitive	17.6	Discordant	2	0
ENSMUSG00000032336	Nptn	1.37038e-20	1.32233e-20	0.162907	0.00662952	0.9414	0.937	4.14979e-16	4.00429e-16
ENSMUSG00000039953	Clstn1	1.44097e-20	3.10557e-20	0.178146	0.00837922	0.4004	0.294	4.36353e-16	9.40428e-16
ENSMUSG00000029359	Tesc	1.50229e-20	3.34333e-20	0.151517	0.00408047	0.235	0.147	4.54923e-16	1.01243e-15
ENSMUSG00000021701	Plk2	1.53093e-20	3.25975e-20	0.193308	0.00965394	0.3174	0.221	4.63596e-16	9.87117e-16
ENSMUSG00000055692	Tmem191c	1.7044e-20	2.29141e-20	0.152376	0.00958807	0.2882	0.195	5.16126e-16	6.93885e-16
ENSMUSG00000014313	Cox6c	1.84928e-20	4.11853e-20	0.173596	0.00959773	0.2746	0.1794	5.59999e-16	1.24717e-15
ENSMUSG00000061911	Myt1l	2.05868e-20	4.18764e-20	0.151363	0.0103935	0.9604	0.9602	6.2341e-16	1.2681e-15	SFARI;EAGLE;TADA	7.02e-08	Definitive	20.35	Concordant	1	0
ENSMUSG00000024462	Gabbr1	2.08442e-20	4.41177e-20	0.164718	0.00558174	0.5114	0.3922	6.31203e-16	1.33597e-15
ENSMUSG00000019990	Pde7b	2.13519e-20	2.79111e-20	0.204141	0.0177042	0.8632	0.8462	6.46579e-16	8.45203e-16
ENSMUSG00000098274	Rpl24	3.14844e-20	7.00499e-20	0.114095	0.00551983	0.131	0.063	9.53409e-16	2.12125e-15
ENSMUSG00000050711	Scg2	3.30219e-20	7.30063e-20	0.183071	0.00779291	0.2286	0.142	9.99969e-16	2.21078e-15
ENSMUSG00000059146	Ntrk3	3.75622e-20	7.9349e-20	0.158672	0.0107215	0.9246	0.9176	1.13746e-15	2.40285e-15	SFARI					2	0
ENSMUSG00000038481	Cdk19	4.14055e-20	6.11762e-20	-0.444035	0.0152331	0.354	0.4284	1.25384e-15	1.85254e-15	SFARI					3	1
ENSMUSG00000032855	Pkd1	4.50131e-20	9.91611e-20	0.183686	0.00928797	0.4488	0.3406	1.36309e-15	3.0028e-15
ENSMUSG00000026737	Pip4k2a	4.85963e-20	1.06129e-19	-0.332731	0.0211382	0.236	0.3244	1.47159e-15	3.2138e-15
ENSMUSG00000074968	Ano3	4.95597e-20	1.04524e-19	0.243044	0.00656941	0.78	0.7748	1.50077e-15	3.16519e-15
ENSMUSG00000022208	Jph4	5.53587e-20	1.23718e-19	0.167986	0.0114483	0.3454	0.241	1.67637e-15	3.74643e-15
ENSMUSG00000033577	Myo6	5.64477e-20	8.56122e-20	-0.268454	0.0174793	0.1658	0.2502	1.70935e-15	2.59251e-15
ENSMUSG00000022321	Cdh10	5.64553e-20	1.26038e-19	-0.271932	0.00920556	0.6006	0.7104	1.70958e-15	3.81669e-15	SFARI					2	0
ENSMUSG00000008658	Rbfox1	5.67441e-20	1.2337e-19	0.209205	0.013512	0.9888	0.983	1.71833e-15	3.73588e-15	SFARI					2	0
ENSMUSG00000067028	Cntnap5b	7.09349e-20	9.42882e-20	0.205262	0.00653264	0.4488	0.3438	2.14805e-15	2.85523e-15
ENSMUSG00000025576	Rbfox3	7.50001e-20	1.64752e-19	0.201769	0.0092316	0.8272	0.825	2.27115e-15	4.98903e-15
ENSMUSG00000055639	Dach1	7.50493e-20	7.86724e-20	0.263445	0.0220556	0.754	0.7292	2.27264e-15	2.38236e-15
ENSMUSG00000071176	Arhgef10	7.7096e-20	1.10195e-19	-0.196204	0.0134549	0.0864	0.1572	2.33462e-15	3.33693e-15	SFARI					2	0
ENSMUSG00000032586	Traip	7.74498e-20	1.47873e-19	0.15556	0.0046418	0.294	0.201	2.34534e-15	4.47788e-15
ENSMUSG00000033392	Clasp2	8.06444e-20	1.59457e-19	-0.241988	0.00740771	0.7592	0.8412	2.44207e-15	4.82867e-15
ENSMUSG00000056812	St8sia3	8.08553e-20	1.10297e-19	0.175208	0.00943807	0.3322	0.2362	2.44846e-15	3.34001e-15
ENSMUSG00000037196	Pacrg	9.26117e-20	1.83256e-19	-0.281221	0.0124338	0.1814	0.2652	2.80447e-15	5.54936e-15
ENSMUSG00000028410	Dnaja1	1.24313e-19	1.76931e-19	0.143808	0.00450838	0.272	0.1822	3.76444e-15	5.35781e-15
ENSMUSG00000021010	Npas3	1.32473e-19	1.71044e-19	-0.526075	0.0193062	0.2186	0.3034	4.01155e-15	5.17956e-15
ENSMUSG00000052613	Pcdh15	1.54007e-19	3.32288e-19	-0.132593	0.0212683	0.4132	0.5484	4.66364e-15	1.00623e-14	SFARI					2	0
ENSMUSG00000037771	Slc32a1	1.79329e-19	2.00429e-19	0.143888	0.00474776	0.2196	0.141	5.43043e-15	6.06938e-15
ENSMUSG00000025225	Nfkb2	1.9048e-19	4.24856e-19	0.10969	0.00654359	0.1344	0.0664	5.76811e-15	1.28655e-14
ENSMUSG00000058325	Dock1	2.26914e-19	4.4515e-19	-0.246724	0.00825287	0.1128	0.186	6.8714e-15	1.348e-14	SFARI					2	0
ENSMUSG00000061751	Kalrn	2.43675e-19	4.71613e-19	0.15139	0.004961	0.9564	0.954	7.37898e-15	1.42814e-14
ENSMUSG00000021259	Cyp46a1	2.48466e-19	2.69424e-19	0.156582	0.00779018	0.2782	0.1902	7.52406e-15	8.15868e-15
ENSMUSG00000029126	Nsg1	2.51358e-19	5.61756e-19	0.176258	0.0110262	0.2768	0.1838	7.61162e-15	1.70111e-14
ENSMUSG00000047216	Cdh19	2.74056e-19	6.11674e-19	-0.223698	0.0182008	0.0678	0.1356	8.29895e-15	1.85227e-14
ENSMUSG00000030168	Adipor2	2.78964e-19	5.36077e-19	-0.344359	0.011127	0.1396	0.215	8.44758e-15	1.62335e-14
ENSMUSG00000054728	Phactr1	2.8799e-19	5.84669e-19	0.261344	0.0160485	0.969	0.964	8.72093e-15	1.77049e-14
ENSMUSG00000036882	Arhgap33	3.04885e-19	6.69876e-19	0.145651	0.00554452	0.2454	0.159	9.23251e-15	2.02852e-14
ENSMUSG00000057914	Cacnb2	3.47177e-19	6.99807e-19	0.173757	0.0209077	0.9496	0.9372	1.05132e-14	2.11915e-14	SFARI					2	0
ENSMUSG00000020321	Mdh1	3.91517e-19	5.43862e-19	0.165439	0.0116958	0.343	0.2472	1.18559e-14	1.64692e-14
ENSMUSG00000025537	Phkg1	3.99292e-19	7.19641e-19	0.177633	0.00833107	0.1118	0.053	1.20914e-14	2.17922e-14
ENSMUSG00000061080	Lsamp	4.09144e-19	6.97901e-19	0.122975	0.0166745	0.9988	0.9964	1.23897e-14	2.11338e-14
ENSMUSG00000028782	Adgrb2	4.69435e-19	1.04441e-18	0.127521	0.00824478	0.2172	0.1324	1.42154e-14	3.1627e-14
ENSMUSG00000046159	Chrm3	4.78115e-19	7.42553e-19	-0.140193	0.016142	0.3816	0.5106	1.44783e-14	2.2486e-14	SFARI					2	0
ENSMUSG00000000088	Cox5a	5.20858e-19	6.61574e-19	0.158304	0.00351407	0.2466	0.164	1.57726e-14	2.00338e-14
ENSMUSG00000034799	Unc13a	5.38254e-19	1.17506e-18	0.168229	0.00683308	0.3506	0.2534	1.62994e-14	3.55832e-14	SFARI					2	1
ENSMUSG00000040385	Ppp1ca	7.3732e-19	9.4112e-19	0.122378	0.00237201	0.1776	0.1046	2.23275e-14	2.8499e-14
ENSMUSG00000030302	Atp2b2	8.06056e-19	1.44313e-18	0.181824	0.0100914	0.8354	0.8416	2.4409e-14	4.37009e-14	SFARI;TADA	0.0229301				2	0
ENSMUSG00000056515	Rab31	8.15431e-19	1.79741e-18	-0.225555	0.0238048	0.1008	0.177	2.46929e-14	5.44292e-14
ENSMUSG00000055540	Epha6	8.85039e-19	1.97886e-18	0.195169	0.0141379	0.9224	0.9294	2.68007e-14	5.99237e-14
ENSMUSG00000022332	Khdrbs3	8.93086e-19	1.93507e-18	-0.148151	0.0124763	0.2758	0.3836	2.70444e-14	5.85977e-14
ENSMUSG00000044216	Kcnj4	9.85358e-19	1.82254e-18	0.107235	0.00439709	0.1472	0.0804	2.98386e-14	5.51903e-14
ENSMUSG00000007656	Arpp19	9.9263e-19	1.7422e-18	0.182398	0.0139383	0.3562	0.2596	3.00588e-14	5.27572e-14
ENSMUSG00000056367	Actr3b	1.48415e-18	2.93331e-18	0.157579	0.00766322	0.3464	0.251	4.49431e-14	8.88265e-14
ENSMUSG00000046442	Ppm1e	1.49771e-18	3.17083e-18	-0.124105	0.0170679	0.3106	0.4318	4.53536e-14	9.6019e-14
ENSMUSG00000003134	Tbc1d8	1.58528e-18	3.11618e-18	0.167684	0.00719066	0.4008	0.3002	4.80053e-14	9.43642e-14
ENSMUSG00000037224	Zfyve28	1.63764e-18	1.82865e-18	0.163253	0.0108385	0.3996	0.301	4.95909e-14	5.53752e-14
ENSMUSG00000025393	Atp5b	1.68634e-18	3.52314e-18	0.172214	0.0086995	0.3742	0.2772	5.10657e-14	1.06688e-13
ENSMUSG00000040260	Daam2	1.7868e-18	3.75324e-18	-0.162892	0.0158936	0.059	0.1212	5.41078e-14	1.13656e-13
ENSMUSG00000025658	Cnksr2	1.84023e-18	3.57112e-18	0.192001	0.0205498	0.9304	0.9232	5.57259e-14	1.08141e-13	SFARI					2	1
ENSMUSG00000046480	Scn4b	1.93527e-18	4.30171e-18	0.154844	0.00855859	0.2482	0.1626	5.8604e-14	1.30265e-13
ENSMUSG00000039488	Cntn5	2.11615e-18	3.46796e-18	0.203758	0.0369643	0.9404	0.936	6.40812e-14	1.05017e-13	SFARI					2	0
ENSMUSG00000026991	Pkp4	2.61831e-18	5.85448e-18	-0.249205	0.0130562	0.5384	0.6366	7.92877e-14	1.77285e-13
ENSMUSG00000016427	Ndufa1	2.87391e-18	4.95135e-18	0.108409	0.00526994	0.127	0.0654	8.70277e-14	1.49937e-13
ENSMUSG00000037428	Vgf	3.47897e-18	6.81737e-18	0.126326	0.00477266	0.1882	0.1144	1.0535e-13	2.06443e-13
ENSMUSG00000051177	Plcb1	3.51067e-18	5.54416e-18	0.152838	0.0164256	0.9854	0.9842	1.0631e-13	1.67888e-13	SFARI					2	0
ENSMUSG00000038495	Otud7b	3.84612e-18	4.75619e-18	-0.263658	0.0134335	0.154	0.2284	1.16468e-13	1.44027e-13
ENSMUSG00000018171	Vmp1	3.86324e-18	7.06288e-18	-0.320826	0.0131395	0.4146	0.4876	1.16987e-13	2.13878e-13
ENSMUSG00000052581	Lrrtm4	4.0214e-18	5.23708e-18	0.152386	0.020312	0.9808	0.9748	1.21776e-13	1.58589e-13
ENSMUSG00000034903	Cobll1	4.69653e-18	4.01746e-18	-0.145079	0.00294343	0.0572	0.1134	1.4222e-13	1.21657e-13
ENSMUSG00000005705	Agrp	5.04493e-18	6.80417e-18	0.132205	0.00735033	0.1982	0.1218	1.52771e-13	2.06044e-13
ENSMUSG00000024736	Tmem132a	5.11898e-18	7.6588e-18	0.120131	0.00633647	0.1876	0.1146	1.55013e-13	2.31924e-13
ENSMUSG00000031818	Cox4i1	5.56884e-18	1.24516e-17	0.188766	0.00947747	0.2896	0.1966	1.68636e-13	3.77058e-13
ENSMUSG00000020486	Septin4	5.89714e-18	7.46176e-18	-0.209997	0.00837248	0.1054	0.1758	1.78577e-13	2.25957e-13
ENSMUSG00000049336	Tenm2	6.87036e-18	1.51072e-17	0.239863	0.0272923	0.939	0.9466	2.08048e-13	4.57477e-13
ENSMUSG00000097545	Mir124a-1hg	7.53302e-18	1.58887e-17	0.193036	0.0112547	0.7026	0.662	2.28115e-13	4.81143e-13
ENSMUSG00000072964	Bhlhb9	8.33108e-18	1.85539e-17	0.133125	0.00692099	0.24	0.1562	2.52282e-13	5.61849e-13
ENSMUSG00000025738	Fbxl16	8.35164e-18	1.51008e-17	0.155706	0.0052992	0.2982	0.2128	2.52904e-13	4.57281e-13
ENSMUSG00000026077	Npas2	9.20451e-18	2.04974e-17	0.193308	0.00806043	0.503	0.4036	2.78731e-13	6.20701e-13	SFARI					2	0
ENSMUSG00000027221	Chst1	1.01457e-17	2.14593e-17	0.12495	0.00498956	0.1972	0.1214	3.07232e-13	6.49831e-13
ENSMUSG00000029632	Ndufa4	1.12786e-17	1.08775e-17	0.14134	0.00623623	0.2442	0.1632	3.41538e-13	3.29392e-13
ENSMUSG00000004207	Psap	1.16696e-17	2.45331e-17	0.156836	0.0186271	0.4036	0.2968	3.53379e-13	7.42912e-13
ENSMUSG00000079157	Nalf1	1.1845e-17	2.50402e-17	-0.207956	0.0149521	0.6816	0.8076	3.5869e-13	7.58268e-13
ENSMUSG00000022885	St6gal1	1.22448e-17	2.7297e-17	-0.172934	0.00661573	0.0698	0.1324	3.70797e-13	8.26607e-13
ENSMUSG00000057322	Rpl38	1.72643e-17	3.76899e-17	0.119647	0.00539375	0.1578	0.0892	5.22799e-13	1.14133e-12
ENSMUSG00000031310	Zmym3	2.3667e-17	3.23966e-17	0.13261	0.00772257	0.239	0.1566	7.16684e-13	9.81034e-13
ENSMUSG00000013997	Nit1	2.37018e-17	3.09646e-17	0.109735	0.00626589	0.1892	0.1158	7.17738e-13	9.37669e-13
ENSMUSG00000027350	Chgb	2.76389e-17	6.02168e-17	0.128117	0.0068854	0.1958	0.121	8.36962e-13	1.82349e-12
ENSMUSG00000027520	Zdbf2	2.81116e-17	5.78772e-17	0.168085	0.0102728	0.225	0.1486	8.51275e-13	1.75264e-12
ENSMUSG00000037605	Adgrl3	2.90883e-17	6.47651e-17	0.15419	0.0153884	0.994	0.9912	8.80851e-13	1.96122e-12
ENSMUSG00000034235	Usp54	3.01088e-17	6.62e-17	-0.297672	0.0232135	0.1578	0.2358	9.11755e-13	2.00467e-12
ENSMUSG00000024558	Mapk4	3.31296e-17	6.32303e-17	0.167809	0.0184502	0.4448	0.3394	1.00323e-12	1.91474e-12
ENSMUSG00000062296	Trank1	3.34557e-17	6.82987e-17	0.173497	0.00481751	0.8406	0.8388	1.01311e-12	2.06822e-12
ENSMUSG00000038530	Rgs4	3.87419e-17	4.9234e-17	0.148178	0.0069405	0.19	0.1192	1.17318e-12	1.4909e-12
ENSMUSG00000031391	L1cam	4.31291e-17	9.50334e-17	0.128278	0.00756633	0.1962	0.1204	1.30604e-12	2.8778e-12
ENSMUSG00000021730	Hcn1	4.95544e-17	7.32824e-17	-0.129438	0.00803059	0.4424	0.5702	1.50061e-12	2.21914e-12	SFARI						1
ENSMUSG00000022494	Shisa9	5.54076e-17	6.52729e-17	0.183653	0.00972656	0.8444	0.845	1.67785e-12	1.97659e-12
ENSMUSG00000030126	Tmcc1	5.71941e-17	1.24469e-16	-0.218975	0.00885404	0.7484	0.8332	1.73195e-12	3.76918e-12
ENSMUSG00000030592	Ryr1	5.80148e-17	1.09447e-16	0.155631	0.0094874	0.2382	0.1608	1.7568e-12	3.31428e-12
ENSMUSG00000037126	Psd	6.47844e-17	8.50422e-17	0.123105	0.00585989	0.1916	0.1198	1.9618e-12	2.57525e-12
ENSMUSG00000029712	Actl6b	7.76391e-17	1.08988e-16	0.113851	0.0081979	0.2038	0.1292	2.35107e-12	3.30037e-12	SFARI						1
ENSMUSG00000018451	6330403K07Rik	8.98702e-17	1.99769e-16	0.113661	0.00643913	0.1472	0.0816	2.72145e-12	6.04939e-12
ENSMUSG00000066129	Kndc1	9.59176e-17	1.32289e-16	-0.197573	0.0115983	0.0852	0.1466	2.90458e-12	4.00598e-12
ENSMUSG00000089715	Cbx6	1.01442e-16	1.54424e-16	0.133997	0.0107167	0.2252	0.1464	3.07187e-12	4.67628e-12
ENSMUSG00000096054	Syne1	1.01867e-16	1.76589e-16	0.144825	0.00521727	0.9498	0.9618	3.08475e-12	5.34746e-12	SFARI					2	1
ENSMUSG00000032011	Thy1	1.0301e-16	2.29424e-16	0.125608	0.00727911	0.1984	0.1232	3.11934e-12	6.94742e-12
ENSMUSG00000026864	Hspa5	1.06382e-16	1.63981e-16	0.125359	0.0120416	0.2686	0.1816	3.22147e-12	4.96568e-12
ENSMUSG00000032294	Pkm	1.10537e-16	2.01242e-16	0.143627	0.00701813	0.2648	0.18	3.34727e-12	6.09402e-12
ENSMUSG00000025579	Gaa	1.13346e-16	2.53442e-16	0.14459	0.0102949	0.2156	0.1344	3.43234e-12	7.67473e-12
ENSMUSG00000036890	Gtdc1	1.26053e-16	1.72359e-16	-0.183348	0.011486	0.3984	0.4982	3.81713e-12	5.21938e-12
ENSMUSG00000019888	Mgat4c	1.31856e-16	2.17595e-16	0.206845	0.0133292	0.8476	0.8528	3.99286e-12	6.58922e-12
ENSMUSG00000038143	Stox2	1.34393e-16	1.63973e-16	0.173981	0.0102517	0.8926	0.9004	4.06968e-12	4.96544e-12
ENSMUSG00000023150	Ivns1abp	1.37702e-16	1.93656e-16	0.144292	0.0148488	0.6096	0.5348	4.16988e-12	5.8643e-12
[truncated: 2,953 more rows]
