# Supplementary material for: An X-linked long non-coding RNA, PTCHD1-AS, regulates autistic behaviors in humans and in mice
Source: Research Square preprint supplement (doi:10.21203/rs.3.rs-5619348/v1), 2025-01-13
Supplement: Supplementary file 4 [file Supplementary Table 11.xlsx]

## Sheet: KO neg
NAME	SIZE	ES	NES	NOM.p.val	FDR.q.val	FWER.p.val	RANK.AT.MAX	LEADING.EDGE	clusterName
BCL11A_TARGET_GENES	3	-0.765501	-1.22177	0.231343	0.525493	1	4550	tags=100%, list=23%, signal=131%
BIOCARTA_ACE2_PATHWAY	11	-0.548031	-1.22439	0.2276	0.523526	1	6056	tags=64%, list=31%, signal=92%
BIOCARTA_AKAP13_PATHWAY	9	-0.470741	-0.993441	0.463918	0.748251	1	243	tags=22%, list=1%, signal=22%
BIOCARTA_ARAP_PATHWAY	12	-0.5618	-1.30055	0.167742	0.453199	1	967	tags=25%, list=5%, signal=26%
BIOCARTA_ARF_PATHWAY	15	-0.24409	-0.576871	0.95107	0.989069	1	14661	tags=100%, list=76%, signal=410%
BIOCARTA_ASBCELL_PATHWAY	5	-0.43908	-0.79996	0.701053	0.926582	1	4620	tags=40%, list=24%, signal=52%
BIOCARTA_ATM_PATHWAY	19	-0.346281	-0.879397	0.637224	0.864331	1	1541	tags=16%, list=8%, signal=17%
BIOCARTA_ATRBRCA_PATHWAY	18	-0.292579	-0.723605	0.839117	0.963867	1	1370	tags=11%, list=7%, signal=12%
BIOCARTA_BBCELL_PATHWAY	4	-0.463407	-0.810364	0.701629	0.919203	1	4620	tags=50%, list=24%, signal=66%
BIOCARTA_CARDIACEGF_PATHWAY	18	-0.342332	-0.854277	0.64461	0.886044	1	1541	tags=22%, list=8%, signal=24%
BIOCARTA_CB1R_PATHWAY	6	-0.363828	-0.694615	0.819315	0.974372	1	594	tags=17%, list=3%, signal=17%
BIOCARTA_CELL2CELL_PATHWAY	9	-0.565654	-1.20821	0.264045	0.535957	1	891	tags=22%, list=5%, signal=23%
BIOCARTA_CELLCYCLE_PATHWAY	22	-0.292636	-0.763698	0.79977	0.946309	1	2813	tags=18%, list=15%, signal=21%
BIOCARTA_CLASSIC_PATHWAY	9	-0.752753	-1.59833	0.0333333	0.224181	1	4256	tags=67%, list=22%, signal=85%
BIOCARTA_COMP_PATHWAY	12	-0.53626	-1.21678	0.234907	0.530616	1	4256	tags=67%, list=22%, signal=85%
BIOCARTA_CYTOKINE_PATHWAY	5	-0.302554	-0.558731	0.93246	0.992393	1	5906	tags=60%, list=30%, signal=86%
BIOCARTA_EEA1_PATHWAY	5	-0.865469	-1.58107	0.0153218	0.241139	1	16	tags=20%, list=0%, signal=20%
BIOCARTA_EPHA4_PATHWAY	8	-0.255828	-0.523787	0.959248	0.995132	1	1124	tags=13%, list=6%, signal=13%
BIOCARTA_EPONFKB_PATHWAY	10	-0.380796	-0.822199	0.697698	0.909894	1	3148	tags=30%, list=16%, signal=36%
BIOCARTA_ERBB3_PATHWAY	6	-0.758464	-1.46599	0.0729387	0.341625	1	835	tags=33%, list=4%, signal=35%
BIOCARTA_ERYTH_PATHWAY	9	-0.458219	-0.964763	0.515215	0.778824	1	3217	tags=33%, list=17%, signal=40%
BIOCARTA_EXTRINSIC_PATHWAY	6	-0.782996	-1.49647	0.0592516	0.31421	1	2714	tags=67%, list=14%, signal=77%
BIOCARTA_FIBRINOLYSIS_PATHWAY	5	-0.670797	-1.24248	0.261488	0.507413	1	3013	tags=60%, list=16%, signal=71%
BIOCARTA_FREE_PATHWAY	7	-0.637165	-1.26672	0.230377	0.485476	1	3148	tags=57%, list=16%, signal=68%
BIOCARTA_FXR_PATHWAY	4	-0.688986	-1.20557	0.277662	0.537636	1	6034	tags=100%, list=31%, signal=145%
BIOCARTA_G1_PATHWAY	25	-0.328559	-0.882287	0.616424	0.861861	1	1723	tags=12%, list=9%, signal=13%
BIOCARTA_GCR_PATHWAY	15	-0.57194	-1.3473	0.126437	0.419705	1	3981	tags=47%, list=21%, signal=59%
BIOCARTA_GSK3_PATHWAY	20	-0.289309	-0.731403	0.838362	0.96126	1	1541	tags=15%, list=8%, signal=16%
BIOCARTA_HES_PATHWAY	10	-0.455986	-1.01767	0.432692	0.72159	1	2097	tags=20%, list=11%, signal=22%
BIOCARTA_IL1R_PATHWAY	25	-0.319285	-0.857109	0.660256	0.884135	1	3666	tags=32%, list=19%, signal=39%
BIOCARTA_INFLAM_PATHWAY	9	-0.69197	-1.48159	0.0684932	0.326208	1	1070	tags=33%, list=6%, signal=35%
BIOCARTA_INTRINSIC_PATHWAY	14	-0.433869	-1.01788	0.450221	0.721459	1	2714	tags=29%, list=14%, signal=33%
BIOCARTA_LECTIN_PATHWAY	7	-0.755995	-1.51092	0.0563231	0.298736	1	4256	tags=71%, list=22%, signal=91%
BIOCARTA_LONGEVITY_PATHWAY	14	-0.459969	-1.0696	0.386924	0.668502	1	3981	tags=36%, list=21%, signal=45%
BIOCARTA_LYMPHOCYTE_PATHWAY	8	-0.474355	-0.986688	0.481163	0.754522	1	827	tags=25%, list=4%, signal=26%
BIOCARTA_MALATEX_PATHWAY	8	-0.671592	-1.38593	0.118012	0.390381	1	4387	tags=63%, list=23%, signal=81%
BIOCARTA_MONOCYTE_PATHWAY	9	-0.464907	-0.97534	0.506893	0.767564	1	827	tags=22%, list=4%, signal=23%
BIOCARTA_MRP_PATHWAY	5	-0.577368	-1.05892	0.422294	0.679534	1	2862	tags=40%, list=15%, signal=47%
BIOCARTA_MSP_PATHWAY	2	-0.738152	-1.10059	0.385254	0.637025	1	1070	tags=50%, list=6%, signal=53%
BIOCARTA_MTA3_PATHWAY	18	-0.333053	-0.822554	0.714747	0.909791	1	3400	tags=28%, list=18%, signal=34%
BIOCARTA_NEUTROPHIL_PATHWAY	7	-0.531738	-1.06912	0.397906	0.667928	1	827	tags=29%, list=4%, signal=30%
BIOCARTA_NFKB_PATHWAY	20	-0.277113	-0.702619	0.868308	0.972455	1	3902	tags=35%, list=20%, signal=44%
BIOCARTA_NKT_PATHWAY	15	-0.381944	-0.907638	0.587607	0.83884	1	3217	tags=20%, list=17%, signal=24%
BIOCARTA_NO2IL12_PATHWAY	9	-0.290031	-0.609501	0.904555	0.986635	1	2275	tags=11%, list=12%, signal=13%
BIOCARTA_NOTCH_PATHWAY	6	-0.44661	-0.855669	0.633155	0.885057	1	7084	tags=50%, list=37%, signal=79%
BIOCARTA_NPP1_PATHWAY	9	-0.704797	-1.50903	0.0580169	0.301178	1	2288	tags=44%, list=12%, signal=50%
BIOCARTA_NUCLEARRS_PATHWAY	19	-0.412739	-1.04473	0.403452	0.694618	1	5196	tags=47%, list=27%, signal=65%
BIOCARTA_P27_PATHWAY	11	-0.329448	-0.734521	0.783389	0.959712	1	5372	tags=36%, list=28%, signal=50%
BIOCARTA_P53_PATHWAY	15	-0.403326	-0.980073	0.476538	0.761637	1	2501	tags=20%, list=13%, signal=23%
BIOCARTA_PARKIN_PATHWAY	8	-0.55609	-1.13831	0.335821	0.598996	1	27	tags=13%, list=0%, signal=13%
BIOCARTA_PCAF_PATHWAY	9	-0.404692	-0.855015	0.644273	0.885292	1	3309	tags=56%, list=17%, signal=67%
BIOCARTA_PEPI_PATHWAY	3	-0.840091	-1.37729	0.112576	0.395342	1	3104	tags=100%, list=16%, signal=119%
BIOCARTA_PLATELETAPP_PATHWAY	10	-0.423269	-0.915681	0.579348	0.832862	1	4568	tags=40%, list=24%, signal=52%
BIOCARTA_PML_PATHWAY	15	-0.443452	-1.06339	0.388093	0.67436	1	6033	tags=67%, list=31%, signal=97%
BIOCARTA_PRION_PATHWAY	10	-0.711774	-1.54131	0.0342612	0.274173	1	2828	tags=70%, list=15%, signal=82%
BIOCARTA_RARRXR_PATHWAY	6	-0.519233	-0.998216	0.482684	0.74368	1	4246	tags=50%, list=22%, signal=64%
BIOCARTA_RAS_PATHWAY	21	-0.319217	-0.820813	0.709091	0.911244	1	3148	tags=33%, list=16%, signal=40%
BIOCARTA_RECK_PATHWAY	8	-0.626543	-1.29488	0.183695	0.457756	1	1377	tags=25%, list=7%, signal=27%
BIOCARTA_RELA_PATHWAY	14	-0.328772	-0.774179	0.745273	0.942922	1	3902	tags=43%, list=20%, signal=54%
BIOCARTA_RNA_PATHWAY	9	-0.371027	-0.7836	0.727869	0.939687	1	7143	tags=67%, list=37%, signal=106%
BIOCARTA_S1P_PATHWAY	6	-0.537282	-1.02076	0.463043	0.718933	1	765	tags=33%, list=4%, signal=35%
BIOCARTA_SET_PATHWAY	8	-0.27398	-0.563083	0.942105	0.991818	1	14080	tags=100%, list=73%, signal=365%
BIOCARTA_SKP2E2F_PATHWAY	9	-0.341045	-0.72765	0.799366	0.962771	1	2836	tags=22%, list=15%, signal=26%
BIOCARTA_SLRP_PATHWAY	4	-0.578334	-1.01015	0.494624	0.731302	1	8179	tags=100%, list=42%, signal=173%
BIOCARTA_SODD_PATHWAY	9	-0.343764	-0.726942	0.808749	0.962891	1	3902	tags=67%, list=20%, signal=83%
BIOCARTA_STEM_PATHWAY	3	-0.631493	-1.02041	0.50404	0.718653	1	1070	tags=33%, list=6%, signal=35%
BIOCARTA_TCAPOPTOSIS_PATHWAY	4	-0.277121	-0.474928	0.98374	0.997674	1	14018	tags=100%, list=72%, signal=361%
BIOCARTA_TERT_PATHWAY	6	-0.364452	-0.706359	0.8061	0.972333	1	5648	tags=50%, list=29%, signal=71%
BIOCARTA_TH1TH2_PATHWAY	12	-0.625486	-1.42071	0.103704	0.368246	1	5066	tags=58%, list=26%, signal=79%
BIOCARTA_TOB1_PATHWAY	12	-0.37903	-0.862339	0.636555	0.878346	1	309	tags=8%, list=2%, signal=8%
BIOCARTA_UCALPAIN_PATHWAY	12	-0.52753	-1.19588	0.244856	0.544277	1	4286	tags=50%, list=22%, signal=64%
BIOCARTA_VOBESITY_PATHWAY	6	-0.699108	-1.33874	0.16167	0.425247	1	160	tags=17%, list=1%, signal=17%
BIOCARTA_WNT_LRP6_PATHWAY	4	-0.872854	-1.50025	0.0243129	0.311315	1	453	tags=25%, list=2%, signal=26%
BRD3_TARGET_GENES	493	-0.204836	-0.857807	0.943503	0.883968	1	3101	tags=17%, list=16%, signal=19%
CARM1_TARGET_GENES	119	-0.307931	-1.09933	0.252174	0.638861	1	2243	tags=18%, list=12%, signal=21%
CBX6_TARGET_GENES	161	-0.33014	-1.22668	0.0944625	0.522626	1	1610	tags=14%, list=8%, signal=15%
CTNNB1_TARGET_GENES	137	-0.30632	-1.11612	0.221133	0.620616	1	1396	tags=11%, list=7%, signal=12%
CUX2_TARGET_GENES	243	-0.237016	-0.925271	0.684624	0.82415	1	2527	tags=16%, list=13%, signal=18%
DDIT3_TARGET_GENES	334	-0.24762	-0.999453	0.443807	0.741956	1	1924	tags=11%, list=10%, signal=12%
DLX6_TARGET_GENES	31	-0.404927	-1.14554	0.267953	0.591241	1	1787	tags=19%, list=9%, signal=21%
DNMT1_TARGET_GENES	110	-0.234792	-0.831264	0.84127	0.903777	1	3329	tags=25%, list=17%, signal=29%
EHMT2_TARGET_GENES	22	-0.582529	-1.53967	0.0442387	0.273979	1	3271	tags=36%, list=17%, signal=44%
GM14296_TARGET_GENES	195	-0.282533	-1.07691	0.254292	0.661829	1	2782	tags=18%, list=14%, signal=21%
GM14326_TARGET_GENES	239	-0.250923	-0.982917	0.492849	0.758188	1	2891	tags=18%, list=15%, signal=20%
GM14393_TARGET_GENES	36	-0.29692	-0.853436	0.711702	0.886475	1	2745	tags=22%, list=14%, signal=26%
GM2004_GM14419_UNIPROT_A2ARL5_UNREVIEWED_TARGET_GENES	104	-0.442538	-1.54599	0.00757576	0.273798	1	2184	tags=21%, list=11%, signal=24%
GM20449_UNIPROT_E9Q3U2_UNREVIEWED_TARGET_GENES	18	-0.411195	-1.02898	0.418947	0.70994	1	2274	tags=22%, list=12%, signal=25%
GM6710_GM14391_UNIPROT_A2ART0_UNREVIEWED_TARGET_GENES	20	-0.359717	-0.914217	0.583158	0.833729	1	1555	tags=25%, list=8%, signal=27%
GM6710_GM14391_UNIPROT_Q8C1K5_UNREVIEWED_TARGET_GENES	300	-0.336811	-1.35926	0.00337079	0.40701	1	2969	tags=20%, list=15%, signal=24%
GM6871_TARGET_GENES	3	-0.814891	-1.33206	0.15222	0.432316	1	555	tags=33%, list=3%, signal=34%
GOBP_10_FORMYLTETRAHYDROFOLATE_METABOLIC_PROCESS	6	-0.684056	-1.30937	0.176849	0.447167	1	938	tags=33%, list=5%, signal=35%
GOBP_2_OXOGLUTARATE_METABOLIC_PROCESS	15	-0.637966	-1.51765	0.0571429	0.293271	1	2875	tags=47%, list=15%, signal=55%
GOBP_2FE_2S_CLUSTER_ASSEMBLY	10	-0.668811	-1.45386	0.0775109	0.349054	1	1730	tags=40%, list=9%, signal=44%
GOBP_3_PHOSPHOADENOSINE_5_PHOSPHOSULFATE_METABOLIC_PROCESS	4	-0.734979	-1.26597	0.196599	0.486265	1	1262	tags=50%, list=7%, signal=53%
GOBP_4FE_4S_CLUSTER_ASSEMBLY	5	-0.67054	-1.21989	0.2579	0.527499	1	1452	tags=40%, list=7%, signal=43%
GOBP_9_CIS_RETINOIC_ACID_METABOLIC_PROCESS	3	-0.816386	-1.32746	0.149254	0.435889	1	122	tags=33%, list=1%, signal=34%
GOBP_ABSCISSION	5	-0.691744	-1.2547	0.226263	0.496145	1	4478	tags=60%, list=23%, signal=78%
GOBP_ACETATE_ESTER_METABOLIC_PROCESS	6	-0.706388	-1.35365	0.148547	0.411306	1	2219	tags=33%, list=11%, signal=38%
GOBP_ACETATE_ESTER_TRANSPORT	9	-0.463949	-0.998051	0.448637	0.743352	1	1066	tags=22%, list=5%, signal=24%
GOBP_ACETYL_COA_BIOSYNTHETIC_PROCESS	19	-0.425831	-1.07517	0.361905	0.663853	1	4720	tags=53%, list=24%, signal=69%
GOBP_ACETYL_COA_METABOLIC_PROCESS	33	-0.459882	-1.30416	0.13089	0.450139	1	4387	tags=48%, list=23%, signal=63%
GOBP_ACINAR_CELL_DIFFERENTIATION	4	-0.772029	-1.32505	0.160638	0.437157	1	698	tags=25%, list=4%, signal=26%
GOBP_ACROSOME_ASSEMBLY	20	-0.322453	-0.832513	0.683927	0.902916	1	2611	tags=20%, list=13%, signal=23%
GOBP_ACTIN_FILAMENT_ORGANIZATION	436	-0.275869	-1.14932	0.0937143	0.588991	1	1846	tags=14%, list=10%, signal=15%
GOBP_ACTIN_FILAMENT_SEVERING	16	-0.562927	-1.39179	0.0973085	0.386701	1	1585	tags=25%, list=8%, signal=27%
GOBP_ACTIVATED_T_CELL_PROLIFERATION	42	-0.247424	-0.736552	0.878505	0.959724	1	2564	tags=19%, list=13%, signal=22%
GOBP_ACTIVATION_INDUCED_CELL_DEATH_OF_T_CELLS	13	-0.526576	-1.2269	0.241164	0.522787	1	5066	tags=62%, list=26%, signal=83%
GOBP_ACTIVATION_OF_CYSTEINE_TYPE_ENDOPEPTIDASE_ACTIVITY	15	-0.366318	-0.867421	0.63029	0.875344	1	2564	tags=27%, list=13%, signal=31%
GOBP_ACTIVATION_OF_CYSTEINE_TYPE_ENDOPEPTIDASE_ACTIVITY_INVOLVED_IN_APOPTOTIC_PROCESS	68	-0.269504	-0.8845	0.672527	0.859769	1	2501	tags=18%, list=13%, signal=20%
GOBP_ACTIVATION_OF_IMMUNE_RESPONSE	402	-0.216611	-0.896746	0.839306	0.847561	1	3514	tags=21%, list=18%, signal=25%
GOBP_ACTIVATION_OF_MEMBRANE_ATTACK_COMPLEX	4	-0.53593	-0.935342	0.563674	0.814539	1	9001	tags=100%, list=46%, signal=187%
GOBP_ACTIVATION_OF_NF_KAPPAB_INDUCING_KINASE_ACTIVITY	13	-0.282744	-0.661832	0.870087	0.979409	1	5894	tags=54%, list=30%, signal=77%
GOBP_ACTIVATION_OF_PROTEIN_KINASE_C_ACTIVITY	4	-0.687424	-1.16782	0.317328	0.573463	1	4549	tags=75%, list=23%, signal=98%
GOBP_ACTOMYOSIN_CONTRACTILE_RING_ORGANIZATION	9	-0.413954	-0.866933	0.632611	0.875654	1	142	tags=11%, list=1%, signal=11%
GOBP_ACTOMYOSIN_STRUCTURE_ORGANIZATION	201	-0.330858	-1.26741	0.04679	0.485729	1	1628	tags=17%, list=8%, signal=18%
GOBP_ACUTE_INFLAMMATORY_RESPONSE	83	-0.258175	-0.88109	0.7173	0.86355	1	4030	tags=30%, list=21%, signal=38%
GOBP_ACUTE_INFLAMMATORY_RESPONSE_TO_ANTIGENIC_STIMULUS	35	-0.278939	-0.816962	0.770968	0.914032	1	4030	tags=40%, list=21%, signal=50%
GOBP_ACYLGLYCEROL_TRANSPORT	5	-0.330378	-0.612863	0.878465	0.985779	1	1186	tags=20%, list=6%, signal=21%
GOBP_ADAPTIVE_IMMUNE_MEMORY_RESPONSE	3	-0.808171	-1.30855	0.12848	0.447342	1	414	tags=33%, list=2%, signal=34%
GOBP_ADAPTIVE_IMMUNE_RESPONSE	348	-0.337431	-1.37072	0.00574713	0.398793	1	4620	tags=36%, list=24%, signal=46%
GOBP_ADAPTIVE_IMMUNE_RESPONSE_BASED_ON_SOMATIC_RECOMBINATION_OF_IMMUNE_RECEPTORS_BUILT_FROM_IMMUNOGLOBULIN_SUPERFAMILY_DOMAINS	270	-0.362407	-1.43221	0.0045819	0.360195	1	4620	tags=37%, list=24%, signal=47%
GOBP_ADAPTIVE_THERMOGENESIS	154	-0.466035	-1.73188	0	0.112426	1	2279	tags=22%, list=12%, signal=25%
GOBP_ADENOHYPOPHYSIS_DEVELOPMENT	10	-0.682434	-1.50911	0.0569685	0.301373	1	4040	tags=50%, list=21%, signal=63%
GOBP_ADENOSINE_METABOLIC_PROCESS	12	-0.39414	-0.89911	0.555436	0.846077	1	661	tags=17%, list=3%, signal=17%
GOBP_ADENOSINE_TRANSPORT	4	-0.848198	-1.46192	0.0549898	0.343927	1	1080	tags=50%, list=6%, signal=53%
GOBP_ADENYLATE_CYCLASE_ACTIVATING_ADRENERGIC_RECEPTOR_SIGNALING_PATHWAY_INVOLVED_IN_HEART_PROCESS	7	-0.434608	-0.876142	0.61547	0.867624	1	647	tags=43%, list=3%, signal=44%
GOBP_ADHERENS_JUNCTION_ASSEMBLY	12	-0.323607	-0.734246	0.795218	0.95935	1	1441	tags=17%, list=7%, signal=18%
GOBP_ADHERENS_JUNCTION_MAINTENANCE	9	-0.400153	-0.839738	0.674218	0.895601	1	162	tags=11%, list=1%, signal=11%
GOBP_ADIPONECTIN_ACTIVATED_SIGNALING_PATHWAY	7	-0.409529	-0.809814	0.683054	0.919595	1	3259	tags=43%, list=17%, signal=51%
GOBP_ADIPOSE_TISSUE_DEVELOPMENT	59	-0.353965	-1.13598	0.24816	0.599903	1	1732	tags=20%, list=9%, signal=22%
GOBP_ADP_METABOLIC_PROCESS	8	-0.491551	-1.02225	0.43949	0.717372	1	2386	tags=38%, list=12%, signal=43%
GOBP_ADP_TRANSPORT	7	-0.320176	-0.639842	0.86971	0.982805	1	4364	tags=43%, list=23%, signal=55%
GOBP_ADULT_HEART_DEVELOPMENT	12	-0.382796	-0.8699	0.634555	0.873058	1	805	tags=17%, list=4%, signal=17%
GOBP_ADULT_LOCOMOTORY_BEHAVIOR	100	-0.361626	-1.26201	0.101124	0.487959	1	2377	tags=22%, list=12%, signal=25%
GOBP_AEROBIC_ELECTRON_TRANSPORT_CHAIN	61	-0.681659	-2.15325	0	0.000454521	0.012	3909	tags=67%, list=20%, signal=84%	oxidative phosphorylation
GOBP_AEROBIC_RESPIRATION	182	-0.582702	-2.21411	0	0.000156973	0.0035	4142	tags=53%, list=21%, signal=66%	oxidative phosphorylation
GOBP_AGGREPHAGY	8	-0.378072	-0.783378	0.733964	0.93933	1	894	tags=13%, list=5%, signal=13%
GOBP_AGGRESOME_ASSEMBLY	6	-0.846596	-1.60589	0.0307692	0.218841	1	2	tags=17%, list=0%, signal=17%
GOBP_ALCOHOL_BIOSYNTHETIC_PROCESS	120	-0.431498	-1.54846	0.00641026	0.271546	1	2603	tags=28%, list=13%, signal=32%
GOBP_ALCOHOL_CATABOLIC_PROCESS	18	-0.56633	-1.43196	0.0891192	0.359835	1	2954	tags=50%, list=15%, signal=59%
GOBP_ALCOHOL_METABOLIC_PROCESS	276	-0.425594	-1.68995	0	0.143683	1	2603	tags=25%, list=13%, signal=29%
GOBP_ALDEHYDE_BIOSYNTHETIC_PROCESS	25	-0.33687	-0.899629	0.608137	0.846157	1	4574	tags=36%, list=24%, signal=47%
GOBP_ALDEHYDE_CATABOLIC_PROCESS	13	-0.666158	-1.5616	0.0413724	0.258664	1	3173	tags=62%, list=16%, signal=74%
GOBP_ALDITOL_BIOSYNTHETIC_PROCESS	4	-0.641538	-1.09511	0.417364	0.642773	1	3611	tags=50%, list=19%, signal=61%
GOBP_ALDITOL_METABOLIC_PROCESS	19	-0.298222	-0.750799	0.80339	0.954744	1	3868	tags=32%, list=20%, signal=39%
GOBP_ALKALOID_METABOLIC_PROCESS	2	-0.429102	-0.643309	0.881874	0.982267	1	11071	tags=100%, list=57%, signal=233%
GOBP_ALPHA_AMINO_ACID_CATABOLIC_PROCESS	62	-0.509759	-1.61696	0.00331492	0.21036	1	4460	tags=44%, list=23%, signal=56%
GOBP_ALPHA_AMINO_ACID_METABOLIC_PROCESS	163	-0.453313	-1.68883	0	0.144119	1	2915	tags=25%, list=15%, signal=29%
GOBP_ALPHA_BETA_T_CELL_ACTIVATION	164	-0.356802	-1.34669	0.0311804	0.420039	1	4101	tags=30%, list=21%, signal=38%
GOBP_ALPHA_BETA_T_CELL_DIFFERENTIATION	109	-0.300225	-1.07165	0.295884	0.666482	1	3682	tags=24%, list=19%, signal=29%
GOBP_ALPHA_BETA_T_CELL_PROLIFERATION	55	-0.451572	-1.43416	0.0338428	0.36135	1	4030	tags=33%, list=21%, signal=41%
GOBP_ALPHA_KETOGLUTARATE_TRANSPORT	3	-0.701228	-1.13686	0.383333	0.599438	1	1719	tags=33%, list=9%, signal=37%
GOBP_AMACRINE_CELL_DIFFERENTIATION	14	-0.428933	-1.02576	0.415179	0.712955	1	567	tags=14%, list=3%, signal=15%
GOBP_AMEBOIDAL_TYPE_CELL_MIGRATION	424	-0.385558	-1.6	0	0.222941	1	2056	tags=20%, list=11%, signal=22%
GOBP_AMELOBLAST_DIFFERENTIATION	7	-0.446871	-0.899586	0.587683	0.8459	1	3322	tags=43%, list=17%, signal=52%
GOBP_AMELOGENESIS	20	-0.496886	-1.27129	0.176407	0.482061	1	1964	tags=35%, list=10%, signal=39%
GOBP_AMINE_BIOSYNTHETIC_PROCESS	35	-0.346802	-0.995366	0.455208	0.745616	1	1272	tags=9%, list=7%, signal=9%
GOBP_AMINE_METABOLIC_PROCESS	102	-0.215026	-0.757193	0.92952	0.950561	1	3263	tags=17%, list=17%, signal=20%
GOBP_AMINO_ACID_BETAINE_METABOLIC_PROCESS	13	-0.627822	-1.44365	0.0859539	0.354121	1	2279	tags=38%, list=12%, signal=44%
GOBP_AMINO_ACID_BETAINE_TRANSPORT	9	-0.57022	-1.20741	0.25079	0.535	1	4171	tags=56%, list=22%, signal=71%
GOBP_AMINO_ACID_BIOSYNTHETIC_PROCESS	59	-0.392715	-1.24626	0.129689	0.504208	1	726	tags=14%, list=4%, signal=14%
GOBP_AMINO_ACID_CATABOLIC_PROCESS	77	-0.477713	-1.58864	0.00317797	0.235258	1	2875	tags=29%, list=15%, signal=33%
GOBP_AMINO_ACID_IMPORT_ACROSS_PLASMA_MEMBRANE	45	-0.477088	-1.45169	0.0396996	0.350461	1	515	tags=9%, list=3%, signal=9%
GOBP_AMINO_ACID_METABOLIC_PROCESS	233	-0.394339	-1.54336	0.00112613	0.273942	1	3469	tags=24%, list=18%, signal=29%
GOBP_AMINO_ACID_NEUROTRANSMITTER_REUPTAKE	5	-0.658572	-1.20944	0.265176	0.535411	1	87	tags=20%, list=0%, signal=20%
GOBP_AMINO_ACID_SALVAGE	5	-0.675918	-1.24123	0.253461	0.508289	1	6288	tags=100%, list=32%, signal=148%
GOBP_AMINO_ACID_TRANSMEMBRANE_TRANSPORT	79	-0.409448	-1.38498	0.0304302	0.391498	1	3229	tags=24%, list=17%, signal=29%
GOBP_AMINO_ACID_TRANSPORT	142	-0.27841	-1.02455	0.38671	0.715137	1	3397	tags=23%, list=18%, signal=28%
GOBP_AMINO_SUGAR_CATABOLIC_PROCESS	15	-0.60528	-1.45353	0.0735294	0.348508	1	4659	tags=53%, list=24%, signal=70%
GOBP_AMINOGLYCAN_CATABOLIC_PROCESS	27	-0.375506	-1.02548	0.425275	0.713438	1	3217	tags=30%, list=17%, signal=35%
GOBP_AMINOPHOSPHOLIPID_TRANSPORT	4	-0.42762	-0.745386	0.749229	0.956853	1	2704	tags=50%, list=14%, signal=58%
GOBP_AMMONIUM_ION_METABOLIC_PROCESS	23	-0.431742	-1.16024	0.25	0.578394	1	1272	tags=22%, list=7%, signal=23%
GOBP_AMMONIUM_TRANSMEMBRANE_TRANSPORT	6	-0.44527	-0.860178	0.63412	0.881496	1	1183	tags=33%, list=6%, signal=35%
GOBP_AMP_BIOSYNTHETIC_PROCESS	15	-0.580557	-1.39234	0.107972	0.387153	1	661	tags=20%, list=3%, signal=21%
GOBP_AMP_METABOLIC_PROCESS	26	-0.424761	-1.1503	0.257292	0.588071	1	3124	tags=27%, list=16%, signal=32%
GOBP_AMP_SALVAGE	8	-0.697345	-1.40791	0.12069	0.373888	1	661	tags=38%, list=3%, signal=39%
GOBP_AMYGDALA_DEVELOPMENT	6	-0.608218	-1.16029	0.301486	0.578485	1	250	tags=17%, list=1%, signal=17%
GOBP_AMYLIN_RECEPTOR_SIGNALING_PATHWAY	5	-0.225289	-0.409414	0.995885	0.998993	1	15023	tags=100%, list=77%, signal=444%
GOBP_AMYLOID_BETA_CLEARANCE	33	-0.485624	-1.38207	0.0897436	0.391928	1	2447	tags=24%, list=13%, signal=28%
GOBP_AMYLOID_BETA_CLEARANCE_BY_CELLULAR_CATABOLIC_PROCESS	8	-0.607189	-1.26453	0.219895	0.486226	1	2000	tags=38%, list=10%, signal=42%
GOBP_AMYLOID_BETA_CLEARANCE_BY_TRANSCYTOSIS	7	-0.267977	-0.532281	0.950873	0.994202	1	1154	tags=14%, list=6%, signal=15%
GOBP_AMYLOID_FIBRIL_FORMATION	27	-0.609665	-1.68485	0.0173116	0.145051	1	2110	tags=48%, list=11%, signal=54%
GOBP_AMYLOID_PRECURSOR_PROTEIN_BIOSYNTHETIC_PROCESS	14	-0.625578	-1.46691	0.069869	0.34161	1	2872	tags=57%, list=15%, signal=67%
GOBP_AMYLOID_PRECURSOR_PROTEIN_METABOLIC_PROCESS	73	-0.299314	-0.996952	0.467249	0.743811	1	1987	tags=18%, list=10%, signal=20%
GOBP_ANATOMICAL_STRUCTURE_MATURATION	255	-0.29377	-1.16173	0.103563	0.578323	1	816	tags=9%, list=4%, signal=10%
GOBP_ANATOMICAL_STRUCTURE_REGRESSION	17	-0.632497	-1.56618	0.038055	0.254849	1	3461	tags=35%, list=18%, signal=43%
GOBP_ANDROGEN_METABOLIC_PROCESS	17	-0.304754	-0.74948	0.792873	0.954519	1	4062	tags=41%, list=21%, signal=52%
GOBP_ANGIOGENESIS	492	-0.317865	-1.32948	0.002331	0.434733	1	2336	tags=19%, list=12%, signal=21%
GOBP_ANGIOGENESIS_INVOLVED_IN_CORONARY_VASCULAR_MORPHOGENESIS	7	-0.548806	-1.11684	0.359213	0.619499	1	1409	tags=29%, list=7%, signal=31%
GOBP_ANGIOGENESIS_INVOLVED_IN_WOUND_HEALING	23	-0.525437	-1.39192	0.0971787	0.38725	1	1843	tags=30%, list=10%, signal=34%
GOBP_ANGIOTENSIN_ACTIVATED_SIGNALING_PATHWAY	18	-0.459819	-1.15915	0.272035	0.579144	1	515	tags=11%, list=3%, signal=11%
GOBP_ANIMAL_ORGAN_REGENERATION	25	-0.35625	-0.952078	0.511156	0.797667	1	3405	tags=28%, list=18%, signal=34%
GOBP_ANTERIOR_HEAD_DEVELOPMENT	8	-0.657931	-1.34509	0.146448	0.41959	1	4578	tags=63%, list=24%, signal=82%
GOBP_ANTERIOR_POSTERIOR_AXIS_SPECIFICATION	51	-0.32121	-1.00212	0.432258	0.739212	1	2097	tags=20%, list=11%, signal=22%
GOBP_ANTERIOR_POSTERIOR_AXON_GUIDANCE	5	-0.784752	-1.46229	0.0658174	0.343795	1	70	tags=20%, list=0%, signal=20%
GOBP_ANTEROGRADE_DENDRITIC_TRANSPORT	9	-0.411868	-0.864846	0.632196	0.877654	1	2139	tags=33%, list=11%, signal=37%
GOBP_ANTEROGRADE_DENDRITIC_TRANSPORT_OF_NEUROTRANSMITTER_RECEPTOR_COMPLEX	5	-0.46195	-0.849452	0.647799	0.888999	1	2139	tags=40%, list=11%, signal=45%
GOBP_ANTEROGRADE_NEURONAL_DENSE_CORE_VESICLE_TRANSPORT	7	-0.44954	-0.89012	0.597748	0.854138	1	192	tags=14%, list=1%, signal=14%
GOBP_ANTIBACTERIAL_HUMORAL_RESPONSE	39	-0.561017	-1.65702	0.0134078	0.165755	1	4903	tags=62%, list=25%, signal=82%
GOBP_ANTIBACTERIAL_INNATE_IMMUNE_RESPONSE	4	-0.838799	-1.45985	0.0621118	0.344996	1	2450	tags=75%, list=13%, signal=86%
GOBP_ANTIGEN_PROCESSING_AND_PRESENTATION	94	-0.39779	-1.3886	0.031016	0.388694	1	2867	tags=31%, list=15%, signal=36%
GOBP_ANTIGEN_PROCESSING_AND_PRESENTATION_OF_ENDOGENOUS_ANTIGEN	25	-0.603021	-1.61316	0.0158898	0.212064	1	5177	tags=60%, list=27%, signal=82%
GOBP_ANTIGEN_PROCESSING_AND_PRESENTATION_OF_EXOGENOUS_ANTIGEN	41	-0.483101	-1.42967	0.0550265	0.361694	1	4030	tags=46%, list=21%, signal=58%
GOBP_ANTIGEN_PROCESSING_AND_PRESENTATION_OF_EXOGENOUS_PEPTIDE_ANTIGEN_VIA_MHC_CLASS_I	7	-0.453877	-0.899994	0.58805	0.846067	1	2296	tags=43%, list=12%, signal=49%
GOBP_ANTIGEN_PROCESSING_AND_PRESENTATION_OF_EXOGENOUS_PEPTIDE_ANTIGEN_VIA_MHC_CLASS_IB	15	-0.706994	-1.68591	0.0128755	0.145094	1	5177	tags=87%, list=27%, signal=118%
GOBP_ANTIGEN_PROCESSING_AND_PRESENTATION_OF_EXOGENOUS_PEPTIDE_ANTIGEN_VIA_MHC_CLASS_II	17	-0.66642	-1.66219	0.013245	0.161476	1	2831	tags=47%, list=15%, signal=55%
GOBP_ANTIGEN_PROCESSING_AND_PRESENTATION_OF_PEPTIDE_ANTIGEN	53	-0.528828	-1.62669	0.00786517	0.199141	1	4030	tags=47%, list=21%, signal=59%
GOBP_ANTIGEN_PROCESSING_AND_PRESENTATION_OF_PEPTIDE_ANTIGEN_VIA_MHC_CLASS_I	32	-0.528909	-1.50734	0.0428571	0.303951	1	2296	tags=34%, list=12%, signal=39%
GOBP_ANTIGEN_PROCESSING_AND_PRESENTATION_OF_PEPTIDE_OR_POLYSACCHARIDE_ANTIGEN_VIA_MHC_CLASS_II	23	-0.535031	-1.40922	0.0842333	0.373765	1	2831	tags=43%, list=15%, signal=51%
GOBP_ANTIGEN_PROCESSING_AND_PRESENTATION_VIA_MHC_CLASS_IB	23	-0.540384	-1.4277	0.0667362	0.362329	1	2242	tags=39%, list=12%, signal=44%
GOBP_ANTIGEN_RECEPTOR_MEDIATED_SIGNALING_PATHWAY	135	-0.255445	-0.936776	0.588692	0.8137	1	3201	tags=24%, list=17%, signal=29%
GOBP_ANTIMICROBIAL_HUMORAL_IMMUNE_RESPONSE_MEDIATED_BY_ANTIMICROBIAL_PEPTIDE	40	-0.308305	-0.915666	0.600863	0.832713	1	4893	tags=33%, list=25%, signal=43%
GOBP_ANTIMICROBIAL_HUMORAL_RESPONSE	67	-0.484748	-1.5767	0.00745474	0.24405	1	4903	tags=43%, list=25%, signal=58%
GOBP_ANTIMICROBIAL_PEPTIDE_PRODUCTION	4	-0.437194	-0.777836	0.723711	0.942015	1	10915	tags=100%, list=56%, signal=229%
GOBP_ANTIVIRAL_INNATE_IMMUNE_RESPONSE	43	-0.307515	-0.916587	0.573093	0.832211	1	4520	tags=40%, list=23%, signal=51%
GOBP_ANTRAL_OVARIAN_FOLLICLE_GROWTH	11	-0.492981	-1.09841	0.356108	0.639929	1	2166	tags=18%, list=11%, signal=20%
GOBP_AORTA_DEVELOPMENT	68	-0.271449	-0.893305	0.659041	0.850326	1	2097	tags=21%, list=11%, signal=23%
GOBP_AORTA_MORPHOGENESIS	34	-0.354034	-1.00852	0.44456	0.732841	1	3508	tags=35%, list=18%, signal=43%
GOBP_AORTA_SMOOTH_MUSCLE_TISSUE_MORPHOGENESIS	4	-0.827251	-1.44302	0.0710498	0.354638	1	1670	tags=50%, list=9%, signal=55%
GOBP_AORTIC_VALVE_DEVELOPMENT	30	-0.41009	-1.13561	0.256813	0.600401	1	2527	tags=30%, list=13%, signal=34%
GOBP_APICAL_JUNCTION_ASSEMBLY	66	-0.38733	-1.26076	0.121872	0.489688	1	1496	tags=17%, list=8%, signal=18%
GOBP_APOPTOTIC_CELL_CLEARANCE	36	-0.254897	-0.743728	0.867039	0.957337	1	5054	tags=44%, list=26%, signal=60%
GOBP_APOPTOTIC_PROCESS_IN_BONE_MARROW_CELL	6	-0.572297	-1.10567	0.376216	0.630721	1	435	tags=33%, list=2%, signal=34%
GOBP_APOPTOTIC_PROCESS_INVOLVED_IN_BLOOD_VESSEL_MORPHOGENESIS	6	-0.64191	-1.22155	0.270601	0.525775	1	2501	tags=33%, list=13%, signal=38%
GOBP_APOPTOTIC_PROCESS_INVOLVED_IN_DEVELOPMENT	36	-0.441029	-1.28422	0.133772	0.468085	1	1896	tags=25%, list=10%, signal=28%
GOBP_APOPTOTIC_PROCESS_INVOLVED_IN_MORPHOGENESIS	24	-0.507422	-1.34739	0.115178	0.420037	1	2869	tags=33%, list=15%, signal=39%
GOBP_APPENDAGE_DEVELOPMENT	179	-0.267555	-1.00474	0.431844	0.737089	1	2639	tags=18%, list=14%, signal=21%
GOBP_ARACHIDONIC_ACID_METABOLIC_PROCESS	30	-0.391795	-1.09702	0.311087	0.641703	1	2695	tags=33%, list=14%, signal=39%
GOBP_ARGININE_BIOSYNTHETIC_PROCESS	3	-0.506717	-0.834238	0.687992	0.901354	1	6910	tags=67%, list=36%, signal=104%
GOBP_ARGININE_CATABOLIC_PROCESS	8	-0.537494	-1.12613	0.33191	0.611418	1	704	tags=25%, list=4%, signal=26%
GOBP_ARGININE_METABOLIC_PROCESS	16	-0.459766	-1.11857	0.324601	0.617357	1	2915	tags=31%, list=15%, signal=37%
GOBP_AROMATIC_AMINO_ACID_FAMILY_CATABOLIC_PROCESS	8	-0.852097	-1.76655	0.00437637	0.0835991	1	1306	tags=38%, list=7%, signal=40%
GOBP_AROMATIC_AMINO_ACID_METABOLIC_PROCESS	23	-0.716939	-1.86855	0.00107875	0.0329394	0.9685	2514	tags=26%, list=13%, signal=30%
GOBP_ARTERIAL_ENDOTHELIAL_CELL_DIFFERENTIATION	6	-0.744582	-1.43149	0.0982776	0.360291	1	4385	tags=50%, list=23%, signal=65%
GOBP_ARTERY_DEVELOPMENT	110	-0.283151	-1.00134	0.443207	0.740173	1	2266	tags=22%, list=12%, signal=25%
GOBP_ARTERY_MORPHOGENESIS	73	-0.342545	-1.13391	0.244353	0.602065	1	3508	tags=33%, list=18%, signal=40%
GOBP_ARTICULAR_CARTILAGE_DEVELOPMENT	7	-0.470339	-0.947703	0.532823	0.801075	1	4048	tags=43%, list=21%, signal=54%
GOBP_ASCENDING_AORTA_DEVELOPMENT	5	-0.713502	-1.32124	0.173913	0.439514	1	2097	tags=40%, list=11%, signal=45%
GOBP_ASPARAGINE_METABOLIC_PROCESS	5	-0.540479	-0.97385	0.524784	0.768994	1	3140	tags=40%, list=16%, signal=48%
GOBP_ASPARTATE_FAMILY_AMINO_ACID_BIOSYNTHETIC_PROCESS	19	-0.299834	-0.768845	0.780893	0.945005	1	5338	tags=37%, list=28%, signal=51%
GOBP_ASPARTATE_FAMILY_AMINO_ACID_CATABOLIC_PROCESS	10	-0.728906	-1.58075	0.0464135	0.240518	1	4460	tags=80%, list=23%, signal=104%
GOBP_ASPARTATE_FAMILY_AMINO_ACID_METABOLIC_PROCESS	36	-0.614485	-1.80289	0.00109529	0.0630327	1	3292	tags=39%, list=17%, signal=47%
GOBP_ASPARTATE_METABOLIC_PROCESS	9	-0.75472	-1.58933	0.0307529	0.234675	1	2414	tags=44%, list=12%, signal=51%
GOBP_ASPARTATE_TRANSMEMBRANE_TRANSPORT	18	-0.549742	-1.3783	0.116109	0.395182	1	2905	tags=39%, list=15%, signal=46%
GOBP_ASTROCYTE_ACTIVATION	19	-0.503285	-1.26356	0.191444	0.486872	1	3555	tags=32%, list=18%, signal=39%
GOBP_ASTROCYTE_DEVELOPMENT	34	-0.659582	-1.90605	0	0.0202086	0.858	750	tags=15%, list=4%, signal=15%	glial differentiation
GOBP_ASTROCYTE_DIFFERENTIATION	86	-0.468967	-1.60512	0.00311203	0.220058	1	961	tags=14%, list=5%, signal=15%
GOBP_ATP_BIOSYNTHETIC_PROCESS	96	-0.578202	-2.00025	0	0.0059488	0.283	3942	tags=63%, list=20%, signal=78%	oxidative phosphorylation
GOBP_ATP_METABOLIC_PROCESS	128	-0.48274	-1.74439	0	0.101708	1	3942	tags=52%, list=20%, signal=65%
GOBP_ATP_SYNTHESIS_COUPLED_ELECTRON_TRANSPORT	76	-0.627997	-2.11786	0	0.000682529	0.021	3909	tags=61%, list=20%, signal=76%	oxidative phosphorylation
GOBP_ATP_TRANSPORT	13	-0.578973	-1.33851	0.146138	0.42477	1	4364	tags=54%, list=23%, signal=69%
GOBP_ATRIOVENTRICULAR_CANAL_DEVELOPMENT	10	-0.68502	-1.48107	0.0682303	0.326677	1	2938	tags=40%, list=15%, signal=47%
GOBP_ATRIOVENTRICULAR_CANAL_MORPHOGENESIS	5	-0.830665	-1.54314	0.0328205	0.273626	1	2938	tags=60%, list=15%, signal=71%
GOBP_ATRIOVENTRICULAR_NODE_DEVELOPMENT	4	-0.626424	-1.07858	0.425662	0.660354	1	4385	tags=50%, list=23%, signal=65%
GOBP_ATTACHMENT_OF_GPI_ANCHOR_TO_PROTEIN	5	-0.596059	-1.10296	0.387027	0.63409	1	7836	tags=100%, list=40%, signal=168%
GOBP_ATTACHMENT_OF_MITOTIC_SPINDLE_MICROTUBULES_TO_KINETOCHORE	21	-0.469851	-1.21601	0.210245	0.530031	1	3197	tags=24%, list=16%, signal=28%
GOBP_ATTACHMENT_OF_SPINDLE_MICROTUBULES_TO_KINETOCHORE	45	-0.398525	-1.20365	0.180143	0.541084	1	3695	tags=22%, list=19%, signal=27%
GOBP_AUDITORY_RECEPTOR_CELL_DEVELOPMENT	29	-0.329795	-0.893988	0.623825	0.850624	1	2951	tags=31%, list=15%, signal=37%
GOBP_AUDITORY_RECEPTOR_CELL_MORPHOGENESIS	24	-0.512638	-1.37646	0.0962162	0.395337	1	2951	tags=38%, list=15%, signal=44%
GOBP_AUTONOMIC_NERVOUS_SYSTEM_DEVELOPMENT	38	-0.47053	-1.39321	0.0743535	0.386882	1	1296	tags=18%, list=7%, signal=20%
GOBP_AUTOPHAGIC_CELL_DEATH	13	-0.416178	-0.954797	0.521598	0.79364	1	2199	tags=23%, list=11%, signal=26%
GOBP_AUTOPHAGOSOME_MEMBRANE_DOCKING	7	-0.321235	-0.635462	0.890985	0.98256	1	1087	tags=14%, list=6%, signal=15%
GOBP_AUTOPHAGOSOME_ORGANIZATION	117	-0.296989	-1.06432	0.306326	0.674021	1	1817	tags=15%, list=9%, signal=17%
GOBP_AUTOPHAGY_OF_MITOCHONDRION	87	-0.257745	-0.87559	0.715645	0.86789	1	1693	tags=11%, list=9%, signal=13%
GOBP_AXIAL_MESODERM_DEVELOPMENT	10	-0.614007	-1.33763	0.153611	0.426038	1	1297	tags=30%, list=7%, signal=32%
GOBP_AXIAL_MESODERM_MORPHOGENESIS	5	-0.680386	-1.25882	0.225564	0.491424	1	1107	tags=40%, list=6%, signal=42%
GOBP_AXIS_ELONGATION	32	-0.603282	-1.73169	0.00315457	0.112233	1	3217	tags=44%, list=17%, signal=52%
GOBP_AXIS_ELONGATION_INVOLVED_IN_SOMITOGENESIS	4	-0.544069	-0.949733	0.554648	0.799865	1	616	tags=25%, list=3%, signal=26%
GOBP_AXON_ENSHEATHMENT_IN_CENTRAL_NERVOUS_SYSTEM	30	-0.76875	-2.14442	0	0.000510248	0.014	1497	tags=43%, list=8%, signal=47%	glial differentiation
GOBP_AXON_REGENERATION	55	-0.350797	-1.10835	0.282774	0.628228	1	821	tags=15%, list=4%, signal=15%
GOBP_AXONEMAL_CENTRAL_APPARATUS_ASSEMBLY	6	-0.26563	-0.509103	0.975135	0.996082	1	1689	tags=17%, list=9%, signal=18%
GOBP_AZOLE_TRANSMEMBRANE_TRANSPORT	10	-0.607155	-1.32621	0.159116	0.436218	1	6260	tags=40%, list=32%, signal=59%
GOBP_B_1_B_CELL_DIFFERENTIATION	6	-0.545701	-1.05201	0.41939	0.688559	1	1443	tags=33%, list=7%, signal=36%
GOBP_B_CELL_MEDIATED_IMMUNITY	127	-0.38079	-1.39002	0.0211581	0.388548	1	4620	tags=41%, list=24%, signal=53%
GOBP_B_CELL_SELECTION	6	-0.722942	-1.40808	0.103992	0.37406	1	4522	tags=67%, list=23%, signal=87%
GOBP_BASE_EXCISION_REPAIR	39	-0.343763	-1.01072	0.442184	0.731607	1	3470	tags=26%, list=18%, signal=31%
GOBP_BASE_EXCISION_REPAIR_AP_SITE_FORMATION	5	-0.290446	-0.532742	0.953464	0.994382	1	13760	tags=100%, list=71%, signal=344%
GOBP_BASE_EXCISION_REPAIR_GAP_FILLING	5	-0.540458	-1.0131	0.471154	0.728049	1	1750	tags=20%, list=9%, signal=22%
GOBP_BASEMENT_MEMBRANE_ASSEMBLY	12	-0.395549	-0.884831	0.61194	0.859951	1	2114	tags=25%, list=11%, signal=28%
GOBP_BASEMENT_MEMBRANE_ORGANIZATION	39	-0.483267	-1.43212	0.0515021	0.360088	1	2380	tags=28%, list=12%, signal=32%
GOBP_BASIC_AMINO_ACID_TRANSMEMBRANE_TRANSPORT	13	-0.275389	-0.642866	0.889121	0.9824	1	4208	tags=23%, list=22%, signal=29%
GOBP_BASIC_AMINO_ACID_TRANSPORT	16	-0.343205	-0.828665	0.692394	0.906344	1	4208	tags=25%, list=22%, signal=32%
GOBP_BASOPHIL_ACTIVATION	3	-0.611232	-0.996114	0.51749	0.745299	1	1905	tags=33%, list=10%, signal=37%
GOBP_BEHAVIORAL_RESPONSE_TO_CHEMICAL_PAIN	5	-0.668928	-1.22845	0.256572	0.522072	1	5590	tags=60%, list=29%, signal=84%
GOBP_BENZENE_CONTAINING_COMPOUND_METABOLIC_PROCESS	17	-0.619771	-1.53902	0.0534031	0.272677	1	3626	tags=47%, list=19%, signal=58%
GOBP_BERGMANN_GLIAL_CELL_DIFFERENTIATION	12	-0.44955	-1.00365	0.459807	0.736966	1	568	tags=17%, list=3%, signal=17%
GOBP_BICARBONATE_TRANSPORT	18	-0.326095	-0.829523	0.683544	0.905679	1	56	tags=6%, list=0%, signal=6%
GOBP_BILE_ACID_AND_BILE_SALT_TRANSPORT	13	-0.743672	-1.72078	0.00641711	0.116468	1	3895	tags=77%, list=20%, signal=96%
GOBP_BILE_ACID_BIOSYNTHETIC_PROCESS	18	-0.663555	-1.63181	0.0206972	0.190979	1	1786	tags=28%, list=9%, signal=31%
GOBP_BILE_ACID_METABOLIC_PROCESS	26	-0.564624	-1.51603	0.047261	0.295066	1	2704	tags=35%, list=14%, signal=40%
GOBP_BINDING_OF_SPERM_TO_ZONA_PELLUCIDA	29	-0.189836	-0.534233	0.986243	0.994554	1	1071	tags=7%, list=6%, signal=7%
GOBP_BIOGENIC_AMINE_METABOLIC_PROCESS	90	-0.254723	-0.86956	0.718884	0.873403	1	3263	tags=19%, list=17%, signal=23%
GOBP_BIOLOGICAL_PHASE	40	-0.320531	-0.958891	0.521972	0.787218	1	2510	tags=25%, list=13%, signal=29%
GOBP_BIOLOGICAL_PROCESS_INVOLVED_IN_INTERACTION_WITH_HOST	128	-0.329778	-1.19833	0.131692	0.542082	1	5030	tags=36%, list=26%, signal=48%
GOBP_BIOLOGICAL_PROCESS_INVOLVED_IN_INTERACTION_WITH_SYMBIONT	89	-0.206797	-0.706307	0.963536	0.972217	1	5500	tags=33%, list=28%, signal=45%
GOBP_BIOLOGICAL_PROCESS_INVOLVED_IN_SYMBIOTIC_INTERACTION	208	-0.270875	-1.04978	0.313433	0.689806	1	5558	tags=36%, list=29%, signal=50%
GOBP_BIOMINERAL_TISSUE_DEVELOPMENT	151	-0.328351	-1.2225	0.101171	0.525108	1	3244	tags=28%, list=17%, signal=34%
GOBP_BLEB_ASSEMBLY	13	-0.819238	-1.90418	0.00104932	0.0206027	0.8655	770	tags=31%, list=4%, signal=32%
GOBP_BLOOD_COAGULATION_FIBRIN_CLOT_FORMATION	10	-0.232292	-0.504739	0.979723	0.996347	1	4083	tags=30%, list=21%, signal=38%
GOBP_BLOOD_VESSEL_ENDOTHELIAL_CELL_DIFFERENTIATION	11	-0.596043	-1.34778	0.148301	0.419639	1	3335	tags=45%, list=17%, signal=55%
GOBP_BLOOD_VESSEL_ENDOTHELIAL_CELL_PROLIFERATION_INVOLVED_IN_SPROUTING_ANGIOGENESIS	20	-0.605038	-1.57216	0.0290011	0.247595	1	2006	tags=40%, list=10%, signal=45%
GOBP_BLOOD_VESSEL_MATURATION	7	-0.384379	-0.768685	0.735546	0.94505	1	2572	tags=43%, list=13%, signal=49%
GOBP_BLOOD_VESSEL_REMODELING	56	-0.303473	-0.966359	0.517131	0.776209	1	2930	tags=21%, list=15%, signal=25%
GOBP_BODY_FLUID_SECRETION	80	-0.394611	-1.32476	0.0604752	0.43709	1	1728	tags=21%, list=9%, signal=23%
GOBP_BODY_MORPHOGENESIS	61	-0.271868	-0.877117	0.680257	0.866825	1	1598	tags=16%, list=8%, signal=18%
GOBP_BONE_CELL_DEVELOPMENT	14	-0.387225	-0.907615	0.563941	0.838716	1	1446	tags=14%, list=7%, signal=15%
GOBP_BONE_DEVELOPMENT	202	-0.288454	-1.11095	0.203297	0.62534	1	2751	tags=19%, list=14%, signal=22%
GOBP_BONE_GROWTH	33	-0.334894	-0.965138	0.498392	0.778467	1	2266	tags=21%, list=12%, signal=24%
GOBP_BONE_MARROW_DEVELOPMENT	8	-0.37438	-0.764553	0.746667	0.946196	1	4803	tags=50%, list=25%, signal=66%
GOBP_BONE_MORPHOGENESIS	97	-0.352798	-1.21907	0.115426	0.528524	1	3015	tags=23%, list=16%, signal=27%
GOBP_BONE_REMODELING	91	-0.480747	-1.66936	0.00110375	0.156825	1	2966	tags=35%, list=15%, signal=41%
GOBP_BONE_RESORPTION	67	-0.463759	-1.49986	0.00733753	0.311854	1	2038	tags=27%, list=11%, signal=30%
GOBP_BONE_TRABECULA_FORMATION	13	-0.626226	-1.44826	0.088017	0.352196	1	732	tags=23%, list=4%, signal=24%
GOBP_BONE_TRABECULA_MORPHOGENESIS	17	-0.641764	-1.58505	0.0251572	0.238712	1	732	tags=24%, list=4%, signal=24%
GOBP_BRANCH_ELONGATION_OF_AN_EPITHELIUM	18	-0.601107	-1.52515	0.0345912	0.286318	1	3217	tags=50%, list=17%, signal=60%
GOBP_BRANCHED_CHAIN_AMINO_ACID_BIOSYNTHETIC_PROCESS	5	-0.827154	-1.50158	0.047046	0.309686	1	726	tags=60%, list=4%, signal=62%
GOBP_BRANCHED_CHAIN_AMINO_ACID_CATABOLIC_PROCESS	20	-0.448921	-1.15432	0.273009	0.584055	1	4422	tags=35%, list=23%, signal=45%
GOBP_BRANCHED_CHAIN_AMINO_ACID_METABOLIC_PROCESS	23	-0.557966	-1.49409	0.0436635	0.31601	1	1031	tags=22%, list=5%, signal=23%
GOBP_BRANCHING_INVOLVED_IN_BLOOD_VESSEL_MORPHOGENESIS	40	-0.441057	-1.30733	0.109489	0.448648	1	2850	tags=33%, list=15%, signal=38%
GOBP_BRANCHING_INVOLVED_IN_LABYRINTHINE_LAYER_MORPHOGENESIS	12	-0.558083	-1.27903	0.198529	0.473332	1	57	tags=8%, list=0%, signal=8%
GOBP_BRANCHING_INVOLVED_IN_MAMMARY_GLAND_DUCT_MORPHOGENESIS	25	-0.41233	-1.09838	0.322162	0.639798	1	1107	tags=24%, list=6%, signal=25%
GOBP_BRANCHING_INVOLVED_IN_PROSTATE_GLAND_MORPHOGENESIS	12	-0.512735	-1.16689	0.298523	0.573396	1	1990	tags=33%, list=10%, signal=37%
GOBP_BRANCHING_INVOLVED_IN_SALIVARY_GLAND_MORPHOGENESIS	23	-0.525494	-1.38114	0.0893434	0.392985	1	2114	tags=30%, list=11%, signal=34%
GOBP_BRANCHING_MORPHOGENESIS_OF_AN_EPITHELIAL_TUBE	166	-0.394799	-1.46711	0.00772627	0.341518	1	2938	tags=27%, list=15%, signal=32%
GOBP_BRONCHUS_DEVELOPMENT	9	-0.433873	-0.915227	0.575472	0.832655	1	1896	tags=33%, list=10%, signal=37%
GOBP_BROWN_FAT_CELL_DIFFERENTIATION	54	-0.415554	-1.31827	0.0909091	0.441946	1	1952	tags=20%, list=10%, signal=23%
GOBP_BRUSH_BORDER_ASSEMBLY	4	-0.729392	-1.2581	0.217768	0.492424	1	2676	tags=50%, list=14%, signal=58%
GOBP_BUD_ELONGATION_INVOLVED_IN_LUNG_BRANCHING	7	-0.67965	-1.37685	0.124863	0.395532	1	1896	tags=29%, list=10%, signal=32%
GOBP_BUNDLE_OF_HIS_DEVELOPMENT	3	-0.544156	-0.878302	0.649337	0.865943	1	8841	tags=100%, list=46%, signal=184%
GOBP_C_X_C_CHEMOKINE_RECEPTOR_CXCR4_SIGNALING_PATHWAY	4	-0.669771	-1.16769	0.317901	0.573581	1	2000	tags=50%, list=10%, signal=56%
GOBP_C21_STEROID_HORMONE_BIOSYNTHETIC_PROCESS	15	-0.433144	-1.02415	0.422198	0.715733	1	4760	tags=53%, list=25%, signal=71%
GOBP_C21_STEROID_HORMONE_METABOLIC_PROCESS	26	-0.514667	-1.38942	0.0829016	0.388508	1	2497	tags=31%, list=13%, signal=35%
GOBP_C4_DICARBOXYLATE_TRANSPORT	25	-0.598862	-1.61706	0.0289389	0.210625	1	2905	tags=44%, list=15%, signal=52%
GOBP_CALCITONIN_FAMILY_RECEPTOR_SIGNALING_PATHWAY	7	-0.436874	-0.885261	0.607864	0.859194	1	4365	tags=43%, list=23%, signal=55%
GOBP_CALCIUM_IMPORT_INTO_THE_MITOCHONDRION	14	-0.317326	-0.752498	0.788482	0.95363	1	2445	tags=29%, list=13%, signal=33%
GOBP_CALCIUM_ION_IMPORT_INTO_SARCOPLASMIC_RETICULUM	5	-0.680836	-1.26008	0.227273	0.490114	1	323	tags=20%, list=2%, signal=20%
GOBP_CALCIUM_MEDIATED_SIGNALING_USING_INTRACELLULAR_CALCIUM_SOURCE	18	-0.34887	-0.870032	0.640131	0.873493	1	2255	tags=28%, list=12%, signal=31%
GOBP_CANALICULAR_BILE_ACID_TRANSPORT	2	-0.680736	-1.02168	0.522638	0.717636	1	1894	tags=50%, list=10%, signal=55%
GOBP_CANONICAL_NF_KAPPAB_SIGNAL_TRANSDUCTION	221	-0.22738	-0.877264	0.799065	0.866694	1	4121	tags=23%, list=21%, signal=29%
GOBP_CANONICAL_WNT_SIGNALING_PATHWAY	282	-0.272969	-1.08341	0.232987	0.65485	1	2804	tags=18%, list=14%, signal=21%
GOBP_CANONICAL_WNT_SIGNALING_PATHWAY_INVOLVED_IN_OSTEOBLAST_DIFFERENTIATION	4	-0.613325	-1.06335	0.424242	0.674064	1	326	tags=25%, list=2%, signal=25%
GOBP_CANONICAL_WNT_SIGNALING_PATHWAY_INVOLVED_IN_REGULATION_OF_CELL_PROLIFERATION	5	-0.575429	-1.04263	0.449187	0.696169	1	326	tags=20%, list=2%, signal=20%
GOBP_CAP_DEPENDENT_TRANSLATIONAL_INITIATION	6	-0.556824	-1.0577	0.426639	0.680998	1	159	tags=17%, list=1%, signal=17%
GOBP_CARBOHYDRATE_CATABOLIC_PROCESS	149	-0.359366	-1.31823	0.0455556	0.441548	1	3036	tags=26%, list=16%, signal=30%
GOBP_CARBOHYDRATE_DERIVATIVE_CATABOLIC_PROCESS	145	-0.283472	-1.0428	0.359909	0.69593	1	2687	tags=21%, list=14%, signal=25%
GOBP_CARBOHYDRATE_DERIVATIVE_TRANSPORT	59	-0.438725	-1.40747	0.0485744	0.373749	1	2905	tags=22%, list=15%, signal=26%
GOBP_CARBOHYDRATE_HOMEOSTASIS	237	-0.255198	-0.995961	0.444563	0.745486	1	3059	tags=21%, list=16%, signal=24%
GOBP_CARBOHYDRATE_MEDIATED_SIGNALING	7	-0.420307	-0.832039	0.665622	0.902906	1	3021	tags=29%, list=16%, signal=34%
GOBP_CARBOHYDRATE_PHOSPHORYLATION	18	-0.221881	-0.552596	0.978328	0.992738	1	2294	tags=11%, list=12%, signal=13%
GOBP_CARBOHYDRATE_TRANSMEMBRANE_TRANSPORT	103	-0.298532	-1.0458	0.35625	0.693178	1	1921	tags=17%, list=10%, signal=18%
GOBP_CARBOHYDRATE_TRANSPORT	129	-0.313663	-1.12771	0.221858	0.609014	1	1921	tags=16%, list=10%, signal=18%
GOBP_CARBON_DIOXIDE_TRANSPORT	9	-0.80741	-1.67659	0.00948367	0.151427	1	1183	tags=44%, list=6%, signal=47%
GOBP_CARDIAC_CHAMBER_MORPHOGENESIS	125	-0.292244	-1.05417	0.314935	0.686159	1	2196	tags=18%, list=11%, signal=20%
GOBP_CARDIAC_CONDUCTION_SYSTEM_DEVELOPMENT	16	-0.264956	-0.645655	0.909187	0.982136	1	14257	tags=100%, list=74%, signal=377%
GOBP_CARDIAC_ENDOTHELIAL_CELL_DIFFERENTIATION	8	-0.425027	-0.873422	0.610403	0.870157	1	1521	tags=25%, list=8%, signal=27%
GOBP_CARDIAC_EPITHELIAL_TO_MESENCHYMAL_TRANSITION	35	-0.416354	-1.20303	0.214058	0.54125	1	4410	tags=37%, list=23%, signal=48%
GOBP_CARDIAC_JELLY_DEVELOPMENT	5	-0.820309	-1.49758	0.0394456	0.313868	1	2938	tags=60%, list=15%, signal=71%
GOBP_CARDIAC_LEFT_VENTRICLE_MORPHOGENESIS	18	-0.280884	-0.70186	0.866109	0.972692	1	2097	tags=17%, list=11%, signal=19%
GOBP_CARDIAC_MUSCLE_CELL_MYOBLAST_DIFFERENTIATION	11	-0.506231	-1.11437	0.342246	0.622062	1	4385	tags=45%, list=23%, signal=59%
GOBP_CARDIAC_MUSCLE_CONTRACTION	118	-0.28171	-1.00402	0.447009	0.737365	1	1441	tags=17%, list=7%, signal=18%
GOBP_CARDIAC_MUSCLE_TISSUE_MORPHOGENESIS	58	-0.391896	-1.24421	0.151351	0.505799	1	3316	tags=29%, list=17%, signal=35%
GOBP_CARDIAC_MUSCLE_TISSUE_REGENERATION	4	-0.556087	-0.976863	0.524793	0.765534	1	5638	tags=50%, list=29%, signal=70%
GOBP_CARDIAC_MYOFIBRIL_ASSEMBLY	16	-0.319447	-0.784577	0.759101	0.938751	1	1409	tags=19%, list=7%, signal=20%
GOBP_CARDIAC_NEURAL_CREST_CELL_DEVELOPMENT_INVOLVED_IN_OUTFLOW_TRACT_MORPHOGENESIS	13	-0.378184	-0.874056	0.603896	0.870059	1	4410	tags=46%, list=23%, signal=60%
GOBP_CARDIAC_PACEMAKER_CELL_DEVELOPMENT	8	-0.264847	-0.540094	0.95094	0.993649	1	14257	tags=100%, list=74%, signal=378%
GOBP_CARDIAC_PACEMAKER_CELL_DIFFERENTIATION	9	-0.356737	-0.763963	0.749474	0.946294	1	3805	tags=22%, list=20%, signal=28%
GOBP_CARDIAC_RIGHT_VENTRICLE_MORPHOGENESIS	13	-0.489943	-1.13117	0.31012	0.604973	1	4410	tags=46%, list=23%, signal=60%
GOBP_CARDIAC_SEPTUM_CELL_DIFFERENTIATION	3	-0.742239	-1.20805	0.283401	0.535667	1	1333	tags=33%, list=7%, signal=36%
GOBP_CARDIAC_SEPTUM_DEVELOPMENT	110	-0.253161	-0.898691	0.667401	0.846465	1	2196	tags=16%, list=11%, signal=18%
GOBP_CARDIAC_SEPTUM_MORPHOGENESIS	70	-0.372128	-1.20939	0.154267	0.535115	1	2196	tags=21%, list=11%, signal=24%
GOBP_CARDIAC_VASCULAR_SMOOTH_MUSCLE_CELL_DEVELOPMENT	5	-0.552746	-1.01326	0.462551	0.727855	1	2097	tags=40%, list=11%, signal=45%
GOBP_CARDIAC_VASCULAR_SMOOTH_MUSCLE_CELL_DIFFERENTIATION	13	-0.440828	-1.01447	0.441718	0.72581	1	2097	tags=23%, list=11%, signal=26%
GOBP_CARDIAC_VENTRICLE_DEVELOPMENT	127	-0.257149	-0.920281	0.635747	0.830754	1	2224	tags=17%, list=11%, signal=19%
GOBP_CARDIAC_VENTRICLE_MORPHOGENESIS	67	-0.4091	-1.32568	0.088204	0.436978	1	2097	tags=22%, list=11%, signal=25%
GOBP_CARDIOBLAST_DIFFERENTIATION	14	-0.368469	-0.868945	0.631027	0.873784	1	4550	tags=43%, list=23%, signal=56%
GOBP_CARDIOBLAST_PROLIFERATION	9	-0.674232	-1.43582	0.0867725	0.359295	1	2301	tags=56%, list=12%, signal=63%
GOBP_CARDIOLIPIN_METABOLIC_PROCESS	15	-0.36318	-0.878394	0.627624	0.86592	1	3766	tags=53%, list=19%, signal=66%
GOBP_CARNITINE_METABOLIC_PROCESS	12	-0.571799	-1.29931	0.165059	0.454828	1	5333	tags=58%, list=28%, signal=80%
GOBP_CARNITINE_TRANSPORT	5	-0.654208	-1.19965	0.288344	0.542581	1	4171	tags=60%, list=22%, signal=76%
GOBP_CARTILAGE_CONDENSATION	17	-0.27616	-0.676606	0.881687	0.977418	1	3443	tags=29%, list=18%, signal=36%
GOBP_CARTILAGE_HOMEOSTASIS	5	-0.542925	-1.00477	0.472652	0.737187	1	2266	tags=60%, list=12%, signal=68%
GOBP_CATAGEN	5	-0.653574	-1.19726	0.295617	0.542898	1	4961	tags=80%, list=26%, signal=107%
GOBP_CATECHOL_CONTAINING_COMPOUND_BIOSYNTHETIC_PROCESS	23	-0.420832	-1.10263	0.316348	0.634505	1	1272	tags=13%, list=7%, signal=14%
GOBP_CATECHOL_CONTAINING_COMPOUND_CATABOLIC_PROCESS	5	-0.322379	-0.584328	0.907527	0.988477	1	13141	tags=100%, list=68%, signal=310%
GOBP_CATECHOL_CONTAINING_COMPOUND_METABOLIC_PROCESS	57	-0.286668	-0.910881	0.614316	0.83666	1	1371	tags=11%, list=7%, signal=11%
GOBP_CATECHOLAMINE_UPTAKE	14	-0.310454	-0.726398	0.818785	0.963165	1	3308	tags=29%, list=17%, signal=34%
GOBP_CAVEOLA_ASSEMBLY	4	-0.757596	-1.31715	0.173036	0.442085	1	4704	tags=100%, list=24%, signal=132%
GOBP_CAVEOLIN_MEDIATED_ENDOCYTOSIS	11	-0.426465	-0.948298	0.535912	0.800369	1	528	tags=18%, list=3%, signal=19%
GOBP_CD4_POSITIVE_ALPHA_BETA_T_CELL_ACTIVATION	101	-0.368934	-1.29125	0.0607064	0.461218	1	3682	tags=28%, list=19%, signal=34%
GOBP_CD4_POSITIVE_ALPHA_BETA_T_CELL_CYTOKINE_PRODUCTION	14	-0.376607	-0.89573	0.592911	0.849099	1	3625	tags=36%, list=19%, signal=44%
GOBP_CD4_POSITIVE_ALPHA_BETA_T_CELL_DIFFERENTIATION	75	-0.348108	-1.15802	0.219873	0.579365	1	3682	tags=27%, list=19%, signal=33%
GOBP_CD4_POSITIVE_ALPHA_BETA_T_CELL_PROLIFERATION	21	-0.407595	-1.0751	0.365169	0.663666	1	861	tags=14%, list=4%, signal=15%
GOBP_CD40_SIGNALING_PATHWAY	14	-0.446171	-1.0493	0.391259	0.690574	1	4549	tags=50%, list=23%, signal=65%
GOBP_CD8_POSITIVE_ALPHA_BETA_T_CELL_ACTIVATION	34	-0.472829	-1.3749	0.0721983	0.39675	1	4631	tags=62%, list=24%, signal=81%
GOBP_CD8_POSITIVE_ALPHA_BETA_T_CELL_DIFFERENTIATION	15	-0.579826	-1.36785	0.119048	0.400077	1	551	tags=27%, list=3%, signal=27%
GOBP_CD8_POSITIVE_ALPHA_BETA_T_CELL_PROLIFERATION	19	-0.544795	-1.37207	0.0994764	0.397849	1	4030	tags=63%, list=21%, signal=80%
GOBP_CDC42_PROTEIN_SIGNAL_TRANSDUCTION	16	-0.506645	-1.2365	0.197662	0.51368	1	1731	tags=25%, list=9%, signal=27%
GOBP_CELL_ACTIVATION_INVOLVED_IN_IMMUNE_RESPONSE	236	-0.305613	-1.20143	0.0778165	0.54222	1	3374	tags=23%, list=17%, signal=28%
GOBP_CELL_ADHESION_MEDIATED_BY_INTEGRIN	79	-0.367515	-1.24195	0.133482	0.507734	1	2526	tags=23%, list=13%, signal=26%
GOBP_CELL_ADHESION_MOLECULE_PRODUCTION	10	-0.592934	-1.29764	0.176034	0.456572	1	6353	tags=80%, list=33%, signal=119%
GOBP_CELL_AGGREGATION	18	-0.263132	-0.647129	0.914226	0.98177	1	3443	tags=28%, list=18%, signal=34%
GOBP_CELL_CELL_ADHESION_INVOLVED_IN_GASTRULATION	9	-0.765925	-1.63466	0.0259605	0.189253	1	6	tags=11%, list=0%, signal=11%
GOBP_CELL_CELL_ADHESION_MEDIATED_BY_INTEGRIN	16	-0.331563	-0.809689	0.710526	0.919629	1	3492	tags=25%, list=18%, signal=30%
GOBP_CELL_CELL_JUNCTION_ASSEMBLY	130	-0.438353	-1.58813	0.00334076	0.235895	1	1707	tags=21%, list=9%, signal=23%
GOBP_CELL_CELL_JUNCTION_MAINTENANCE	20	-0.439438	-1.126	0.309422	0.611145	1	885	tags=15%, list=5%, signal=16%
GOBP_CELL_CELL_JUNCTION_ORGANIZATION	186	-0.408752	-1.55114	0.00107759	0.269691	1	1496	tags=18%, list=8%, signal=20%
GOBP_CELL_CELL_RECOGNITION	49	-0.320932	-0.979206	0.483122	0.762619	1	1071	tags=8%, list=6%, signal=9%
GOBP_CELL_CHEMOTAXIS	241	-0.413757	-1.61819	0	0.21016	1	2332	tags=25%, list=12%, signal=28%
GOBP_CELL_COMMUNICATION_BY_ELECTRICAL_COUPLING	18	-0.504911	-1.25986	0.187166	0.490168	1	2752	tags=39%, list=14%, signal=45%
GOBP_CELL_COMMUNICATION_BY_ELECTRICAL_COUPLING_INVOLVED_IN_CARDIAC_CONDUCTION	9	-0.328363	-0.702693	0.811625	0.972718	1	2752	tags=33%, list=14%, signal=39%
GOBP_CELL_CYCLE_CHECKPOINT_SIGNALING	185	-0.216815	-0.823877	0.900565	0.909583	1	1424	tags=8%, list=7%, signal=9%
GOBP_CELL_CYCLE_PHASE	20	-0.463038	-1.193	0.246531	0.546764	1	2510	tags=25%, list=13%, signal=29%
GOBP_CELL_DIFFERENTIATION_IN_HINDBRAIN	28	-0.514092	-1.39962	0.0836864	0.378815	1	698	tags=18%, list=4%, signal=18%
GOBP_CELL_DIFFERENTIATION_IN_SPINAL_CORD	36	-0.300398	-0.864891	0.663802	0.877738	1	2825	tags=22%, list=15%, signal=26%
GOBP_CELL_DIFFERENTIATION_INVOLVED_IN_KIDNEY_DEVELOPMENT	43	-0.424535	-1.28002	0.115512	0.473128	1	4410	tags=40%, list=23%, signal=51%
GOBP_CELL_DIFFERENTIATION_INVOLVED_IN_METANEPHROS_DEVELOPMENT	17	-0.506022	-1.22787	0.209903	0.5223	1	4170	tags=53%, list=22%, signal=67%
GOBP_CELL_DIFFERENTIATION_INVOLVED_IN_SALIVARY_GLAND_DEVELOPMENT	4	-0.646248	-1.11444	0.383117	0.622091	1	5659	tags=75%, list=29%, signal=106%
GOBP_CELL_FATE_COMMITMENT	231	-0.279636	-1.1036	0.190255	0.633736	1	3397	tags=22%, list=18%, signal=26%
GOBP_CELL_FATE_COMMITMENT_INVOLVED_IN_FORMATION_OF_PRIMARY_GERM_LAYER	21	-0.302869	-0.794898	0.76046	0.929509	1	3529	tags=29%, list=18%, signal=35%
GOBP_CELL_FATE_DETERMINATION	29	-0.406284	-1.13302	0.281285	0.603377	1	1896	tags=21%, list=10%, signal=23%
GOBP_CELL_FATE_SPECIFICATION	79	-0.321087	-1.05663	0.346622	0.682423	1	2938	tags=24%, list=15%, signal=28%
GOBP_CELL_KILLING	145	-0.30997	-1.13805	0.171642	0.599194	1	4691	tags=34%, list=24%, signal=44%
GOBP_CELL_MATRIX_ADHESION	211	-0.400813	-1.55287	0.00221729	0.268258	1	2037	tags=19%, list=11%, signal=21%
GOBP_CELL_MATURATION	183	-0.351286	-1.32327	0.0300668	0.439293	1	1727	tags=14%, list=9%, signal=15%
GOBP_CELL_MIGRATION_IN_HINDBRAIN	22	-0.461033	-1.21381	0.204545	0.531942	1	1168	tags=27%, list=6%, signal=29%
GOBP_CELL_MIGRATION_INVOLVED_IN_HEART_DEVELOPMENT	17	-0.245225	-0.605126	0.945687	0.987163	1	4385	tags=35%, list=23%, signal=46%
GOBP_CELL_MIGRATION_INVOLVED_IN_KIDNEY_DEVELOPMENT	4	-0.805522	-1.40404	0.0803662	0.376879	1	3705	tags=75%, list=19%, signal=93%
GOBP_CELL_MIGRATION_INVOLVED_IN_METANEPHROS_DEVELOPMENT	3	-0.809089	-1.31635	0.153	0.443445	1	3705	tags=100%, list=19%, signal=124%
GOBP_CELL_PROLIFERATION_IN_BONE_MARROW	11	-0.666687	-1.48089	0.0750552	0.32676	1	3335	tags=45%, list=17%, signal=55%
GOBP_CELL_PROLIFERATION_IN_FOREBRAIN	34	-0.378601	-1.07209	0.362694	0.666352	1	357	tags=9%, list=2%, signal=9%
GOBP_CELL_PROLIFERATION_IN_HINDBRAIN	18	-0.608209	-1.51244	0.0522388	0.297582	1	4274	tags=56%, list=22%, signal=71%
GOBP_CELL_PROLIFERATION_INVOLVED_IN_HEART_MORPHOGENESIS	18	-0.597467	-1.49436	0.0603538	0.316889	1	2301	tags=39%, list=12%, signal=44%
GOBP_CELL_QUIESCENCE	7	-0.759263	-1.54268	0.0496689	0.27345	1	1460	tags=57%, list=8%, signal=62%
GOBP_CELL_REDOX_HOMEOSTASIS	29	-0.394653	-1.10092	0.306034	0.636822	1	3594	tags=31%, list=19%, signal=38%
GOBP_CELL_SUBSTRATE_ADHESION	337	-0.36745	-1.49116	0	0.317682	1	2992	tags=25%, list=15%, signal=29%
GOBP_CELL_SUBSTRATE_JUNCTION_DISASSEMBLY	8	-0.440683	-0.911116	0.555198	0.836493	1	3201	tags=38%, list=17%, signal=45%
GOBP_CELL_SUBSTRATE_JUNCTION_ORGANIZATION	104	-0.376254	-1.32171	0.0537634	0.439451	1	2037	tags=20%, list=11%, signal=22%
GOBP_CELL_SURFACE_RECEPTOR_SIGNALING_PATHWAY_INVOLVED_IN_HEART_DEVELOPMENT	19	-0.61392	-1.56489	0.0414894	0.256021	1	5185	tags=47%, list=27%, signal=65%
GOBP_CELL_VOLUME_HOMEOSTASIS	34	-0.462031	-1.313	0.121925	0.445363	1	3127	tags=41%, list=16%, signal=49%
GOBP_CELLULAR_ALDEHYDE_METABOLIC_PROCESS	66	-0.546718	-1.79251	0	0.0682075	1	3173	tags=38%, list=16%, signal=45%
GOBP_CELLULAR_COMPONENT_ASSEMBLY_INVOLVED_IN_MORPHOGENESIS	112	-0.527035	-1.87978	0	0.0283644	0.9505	1539	tags=19%, list=8%, signal=20%
GOBP_CELLULAR_DEFENSE_RESPONSE	11	-0.532897	-1.19964	0.255272	0.542407	1	695	tags=18%, list=4%, signal=19%
GOBP_CELLULAR_DETOXIFICATION_OF_ALDEHYDE	9	-0.670485	-1.4366	0.109359	0.361007	1	3173	tags=56%, list=16%, signal=66%
GOBP_CELLULAR_HYPOTONIC_RESPONSE	7	-0.554799	-1.10732	0.369295	0.629346	1	538	tags=29%, list=3%, signal=29%
GOBP_CELLULAR_KETONE_BODY_METABOLIC_PROCESS	6	-0.387875	-0.746502	0.752654	0.95635	1	1031	tags=17%, list=5%, signal=18%
GOBP_CELLULAR_KETONE_METABOLIC_PROCESS	187	-0.298868	-1.14212	0.169133	0.594319	1	3192	tags=26%, list=16%, signal=31%
GOBP_CELLULAR_LIPID_BIOSYNTHETIC_PROCESS	11	-0.415616	-0.912321	0.567308	0.835376	1	3335	tags=45%, list=17%, signal=55%
GOBP_CELLULAR_LIPID_CATABOLIC_PROCESS	189	-0.5182	-1.97163	0	0.00892419	0.4435	3293	tags=38%, list=17%, signal=45%
GOBP_CELLULAR_METABOLIC_COMPOUND_SALVAGE	32	-0.50113	-1.43247	0.0594714	0.359926	1	3521	tags=34%, list=18%, signal=42%
GOBP_CELLULAR_MODIFIED_AMINO_ACID_BIOSYNTHETIC_PROCESS	21	-0.655114	-1.69906	0.00842993	0.135552	1	3259	tags=38%, list=17%, signal=46%
GOBP_CELLULAR_MODIFIED_AMINO_ACID_CATABOLIC_PROCESS	19	-0.434979	-1.10264	0.330526	0.634667	1	2891	tags=37%, list=15%, signal=43%
GOBP_CELLULAR_MODIFIED_AMINO_ACID_METABOLIC_PROCESS	99	-0.360175	-1.26514	0.0765957	0.486632	1	3319	tags=32%, list=17%, signal=39%
GOBP_CELLULAR_OXIDANT_DETOXIFICATION	25	-0.503733	-1.35581	0.104447	0.409186	1	1779	tags=24%, list=9%, signal=26%
GOBP_CELLULAR_PIGMENTATION	53	-0.345752	-1.08307	0.313682	0.655301	1	1526	tags=17%, list=8%, signal=18%
GOBP_CELLULAR_RESPIRATION	230	-0.528022	-2.05174	0	0.00258079	0.1045	4142	tags=47%, list=21%, signal=60%	oxidative phosphorylation
GOBP_CELLULAR_RESPONSE_TO_ACIDIC_PH	10	-0.457813	-0.989082	0.467437	0.75181	1	1618	tags=20%, list=8%, signal=22%
GOBP_CELLULAR_RESPONSE_TO_ALDEHYDE	14	-0.511259	-1.21378	0.251354	0.531363	1	3173	tags=36%, list=16%, signal=43%
GOBP_CELLULAR_RESPONSE_TO_ALKALOID	29	-0.294536	-0.827788	0.715197	0.907024	1	1152	tags=14%, list=6%, signal=15%
GOBP_CELLULAR_RESPONSE_TO_ARSENIC_CONTAINING_SUBSTANCE	17	-0.303496	-0.747364	0.780127	0.955795	1	1564	tags=18%, list=8%, signal=19%
GOBP_CELLULAR_RESPONSE_TO_ATP	9	-0.536441	-1.16995	0.275521	0.571155	1	5590	tags=78%, list=29%, signal=109%
GOBP_CELLULAR_RESPONSE_TO_CAFFEINE	8	-0.57328	-1.16496	0.295031	0.575236	1	2347	tags=50%, list=12%, signal=57%
GOBP_CELLULAR_RESPONSE_TO_CAMP	36	-0.34057	-1.00957	0.425662	0.73177	1	1636	tags=19%, list=8%, signal=21%
GOBP_CELLULAR_RESPONSE_TO_CHEMICAL_STRESS	271	-0.273344	-1.08263	0.240267	0.655382	1	2221	tags=15%, list=11%, signal=17%
GOBP_CELLULAR_RESPONSE_TO_CHOLESTEROL	14	-0.509437	-1.21288	0.232787	0.532573	1	1141	tags=21%, list=6%, signal=23%
GOBP_CELLULAR_RESPONSE_TO_COLD	14	-0.370775	-0.877289	0.615966	0.866993	1	4770	tags=36%, list=25%, signal=47%
GOBP_CELLULAR_RESPONSE_TO_COPPER_ION	12	-0.556568	-1.25937	0.196635	0.490381	1	2117	tags=42%, list=11%, signal=47%
GOBP_CELLULAR_RESPONSE_TO_DEXAMETHASONE_STIMULUS	19	-0.300838	-0.766518	0.792308	0.945612	1	1896	tags=21%, list=10%, signal=23%
GOBP_CELLULAR_RESPONSE_TO_DSRNA	18	-0.525554	-1.29266	0.167377	0.460043	1	4704	tags=56%, list=24%, signal=73%
GOBP_CELLULAR_RESPONSE_TO_ESTROGEN_STIMULUS	16	-0.301209	-0.739156	0.818276	0.958734	1	2937	tags=25%, list=15%, signal=29%
GOBP_CELLULAR_RESPONSE_TO_ETHANOL	11	-0.403072	-0.899688	0.591444	0.846381	1	1050	tags=27%, list=5%, signal=29%
GOBP_CELLULAR_RESPONSE_TO_EXOGENOUS_DSRNA	13	-0.484622	-1.12387	0.33843	0.612078	1	4704	tags=54%, list=24%, signal=71%
GOBP_CELLULAR_RESPONSE_TO_FATTY_ACID	20	-0.30631	-0.783429	0.759959	0.939425	1	4099	tags=40%, list=21%, signal=51%
GOBP_CELLULAR_RESPONSE_TO_GAMMA_RADIATION	27	-0.286377	-0.77602	0.782946	0.941688	1	1377	tags=11%, list=7%, signal=12%
GOBP_CELLULAR_RESPONSE_TO_GLUCAGON_STIMULUS	4	-0.550523	-0.949273	0.569607	0.799687	1	2799	tags=50%, list=14%, signal=58%
GOBP_CELLULAR_RESPONSE_TO_GLUCOSE_STARVATION	45	-0.235994	-0.716481	0.926803	0.966557	1	748	tags=7%, list=4%, signal=7%
GOBP_CELLULAR_RESPONSE_TO_GONADOTROPIN_RELEASING_HORMONE	3	-0.760929	-1.249	0.226105	0.500542	1	111	tags=33%, list=1%, signal=34%
GOBP_CELLULAR_RESPONSE_TO_HEAT	48	-0.461129	-1.39862	0.0629591	0.379638	1	2732	tags=21%, list=14%, signal=24%
GOBP_CELLULAR_RESPONSE_TO_HYDROGEN_PEROXIDE	57	-0.247779	-0.782794	0.845745	0.93965	1	2940	tags=23%, list=15%, signal=27%
GOBP_CELLULAR_RESPONSE_TO_HYPOXIA	112	-0.249298	-0.876084	0.732318	0.867564	1	3554	tags=25%, list=18%, signal=30%
GOBP_CELLULAR_RESPONSE_TO_INTERFERON_ALPHA	15	-0.345255	-0.835793	0.66704	0.899738	1	6306	tags=47%, list=33%, signal=69%
GOBP_CELLULAR_RESPONSE_TO_INTERLEUKIN_1	63	-0.18817	-0.603051	0.995722	0.98711	1	4254	tags=24%, list=22%, signal=30%
GOBP_CELLULAR_RESPONSE_TO_IONIZING_RADIATION	67	-0.254847	-0.830175	0.78821	0.905034	1	1377	tags=10%, list=7%, signal=11%
GOBP_CELLULAR_RESPONSE_TO_IRON_ION	11	-0.748056	-1.66732	0.0138889	0.158039	1	1028	tags=36%, list=5%, signal=38%
GOBP_CELLULAR_RESPONSE_TO_LIPOPROTEIN_PARTICLE_STIMULUS	33	-0.537284	-1.56328	0.0230516	0.25743	1	750	tags=15%, list=4%, signal=16%
GOBP_CELLULAR_RESPONSE_TO_MECHANICAL_STIMULUS	34	-0.401848	-1.15948	0.24375	0.578759	1	1281	tags=21%, list=7%, signal=22%
GOBP_CELLULAR_RESPONSE_TO_MOLECULE_OF_FUNGAL_ORIGIN	3	-0.77282	-1.25017	0.227557	0.500771	1	3254	tags=33%, list=17%, signal=40%
GOBP_CELLULAR_RESPONSE_TO_MURAMYL_DIPEPTIDE	9	-0.524796	-1.13624	0.323028	0.600286	1	3741	tags=44%, list=19%, signal=55%
GOBP_CELLULAR_RESPONSE_TO_NICOTINE	7	-0.764418	-1.54414	0.0550162	0.273415	1	3749	tags=71%, list=19%, signal=89%
GOBP_CELLULAR_RESPONSE_TO_NITROGEN_STARVATION	8	-0.680067	-1.41727	0.117521	0.36954	1	2788	tags=38%, list=14%, signal=44%
GOBP_CELLULAR_RESPONSE_TO_NITROSATIVE_STRESS	6	-0.414077	-0.784291	0.719113	0.938831	1	2125	tags=33%, list=11%, signal=37%
GOBP_CELLULAR_RESPONSE_TO_NUTRIENT	35	-0.311049	-0.900295	0.606349	0.846289	1	3796	tags=37%, list=20%, signal=46%
GOBP_CELLULAR_RESPONSE_TO_OXIDATIVE_STRESS	219	-0.278546	-1.07899	0.268508	0.659948	1	2405	tags=16%, list=12%, signal=18%
GOBP_CELLULAR_RESPONSE_TO_OXYGEN_RADICAL	18	-0.527815	-1.31856	0.142251	0.442259	1	2878	tags=33%, list=15%, signal=39%
GOBP_CELLULAR_RESPONSE_TO_PEPTIDOGLYCAN	6	-0.572624	-1.10678	0.371277	0.629633	1	2000	tags=33%, list=10%, signal=37%
GOBP_CELLULAR_RESPONSE_TO_PH	19	-0.651218	-1.64615	0.0134159	0.17697	1	1618	tags=26%, list=8%, signal=29%
GOBP_CELLULAR_RESPONSE_TO_PROSTAGLANDIN_E_STIMULUS	11	-0.266253	-0.586197	0.935551	0.988267	1	3981	tags=27%, list=21%, signal=34%
GOBP_CELLULAR_RESPONSE_TO_PROSTAGLANDIN_STIMULUS	14	-0.492257	-1.16096	0.277538	0.578087	1	4099	tags=43%, list=21%, signal=54%
GOBP_CELLULAR_RESPONSE_TO_PURINE_CONTAINING_COMPOUND	11	-0.4635	-1.04158	0.40625	0.697577	1	2347	tags=36%, list=12%, signal=41%
GOBP_CELLULAR_RESPONSE_TO_REACTIVE_OXYGEN_SPECIES	127	-0.31709	-1.15089	0.18551	0.587709	1	2940	tags=21%, list=15%, signal=25%
GOBP_CELLULAR_RESPONSE_TO_SALT_STRESS	12	-0.45104	-1.03264	0.418484	0.705738	1	1183	tags=17%, list=6%, signal=18%
GOBP_CELLULAR_RESPONSE_TO_SODIUM_ARSENITE	5	-0.48714	-0.89439	0.594924	0.85045	1	1457	tags=20%, list=8%, signal=22%
GOBP_CELLULAR_RESPONSE_TO_STEROL	18	-0.548477	-1.36556	0.120301	0.40221	1	1399	tags=28%, list=7%, signal=30%
GOBP_CELLULAR_RESPONSE_TO_TOPOLOGICALLY_INCORRECT_PROTEIN	100	-0.423981	-1.49317	0.00431035	0.316284	1	1837	tags=15%, list=9%, signal=16%
GOBP_CELLULAR_RESPONSE_TO_TOXIC_SUBSTANCE	53	-0.439054	-1.36228	0.0653595	0.403934	1	3199	tags=36%, list=16%, signal=43%
GOBP_CELLULAR_RESPONSE_TO_TYPE_II_INTERFERON	97	-0.308856	-1.07484	0.304585	0.664097	1	1581	tags=12%, list=8%, signal=13%
GOBP_CELLULAR_RESPONSE_TO_UNFOLDED_PROTEIN	79	-0.484577	-1.62246	0.00610376	0.205321	1	1837	tags=16%, list=9%, signal=18%
GOBP_CELLULAR_RESPONSE_TO_UV_B	13	-0.276291	-0.64656	0.898613	0.98184	1	1813	tags=15%, list=9%, signal=17%
GOBP_CELLULAR_RESPONSE_TO_UV_C	4	-0.457348	-0.798469	0.703426	0.926862	1	5860	tags=50%, list=30%, signal=72%
GOBP_CELLULAR_RESPONSE_TO_VASCULAR_ENDOTHELIAL_GROWTH_FACTOR_STIMULUS	58	-0.451004	-1.43625	0.0373134	0.360532	1	2221	tags=31%, list=11%, signal=35%
GOBP_CELLULAR_RESPONSE_TO_VITAMIN	16	-0.428133	-1.04886	0.39413	0.690301	1	3500	tags=44%, list=18%, signal=53%
GOBP_CELLULAR_RESPONSE_TO_VITAMIN_D	13	-0.389859	-0.903447	0.585185	0.843322	1	3144	tags=38%, list=16%, signal=46%
GOBP_CELLULAR_RESPONSE_TO_XENOBIOTIC_STIMULUS	104	-0.353502	-1.24489	0.101053	0.505116	1	2395	tags=20%, list=12%, signal=23%
GOBP_CEMENTUM_MINERALIZATION	6	-0.653411	-1.2375	0.229979	0.512241	1	732	tags=33%, list=4%, signal=35%
GOBP_CENP_A_CONTAINING_CHROMATIN_ASSEMBLY	9	-0.286894	-0.593377	0.938259	0.987924	1	13830	tags=100%, list=71%, signal=349%
GOBP_CENTRAL_NERVOUS_SYSTEM_MYELIN_FORMATION	8	-0.786425	-1.61367	0.0209864	0.212405	1	1497	tags=38%, list=8%, signal=41%
GOBP_CERAMIDE_BIOSYNTHETIC_PROCESS	65	-0.429557	-1.39558	0.0418552	0.383049	1	2798	tags=28%, list=14%, signal=32%
GOBP_CERAMIDE_CATABOLIC_PROCESS	18	-0.629752	-1.59813	0.0336488	0.224195	1	2687	tags=39%, list=14%, signal=45%
GOBP_CERAMIDE_METABOLIC_PROCESS	92	-0.484342	-1.66264	0	0.16155	1	2798	tags=32%, list=14%, signal=37%
GOBP_CERAMIDE_TRANSPORT	13	-0.758058	-1.76876	0.00948367	0.0828961	1	1316	tags=38%, list=7%, signal=41%
GOBP_CEREBELLAR_CORTEX_FORMATION	32	-0.321401	-0.908171	0.597574	0.838895	1	1421	tags=16%, list=7%, signal=17%
GOBP_CEREBELLAR_GRANULAR_LAYER_DEVELOPMENT	16	-0.588802	-1.43413	0.0780591	0.361102	1	698	tags=25%, list=4%, signal=26%
GOBP_CEREBELLAR_GRANULAR_LAYER_FORMATION	10	-0.625867	-1.36495	0.148228	0.402551	1	698	tags=30%, list=4%, signal=31%
GOBP_CEREBELLAR_GRANULAR_LAYER_MORPHOGENESIS	12	-0.567794	-1.2957	0.1802	0.457761	1	698	tags=25%, list=4%, signal=26%
GOBP_CEREBELLAR_PURKINJE_CELL_GRANULE_CELL_PRECURSOR_CELL_SIGNALING_INVOLVED_IN_REGULATION_OF_GRANULE_CELL_PRECURSOR_CELL_PROLIFERATION	7	-0.640443	-1.29339	0.185841	0.459279	1	4274	tags=57%, list=22%, signal=73%
GOBP_CEREBELLAR_PURKINJE_CELL_LAYER_DEVELOPMENT	38	-0.265369	-0.779915	0.808977	0.940587	1	1752	tags=13%, list=9%, signal=14%
GOBP_CEREBRAL_CORTEX_GABAERGIC_INTERNEURON_DEVELOPMENT	7	-0.448191	-0.905329	0.584665	0.841401	1	5180	tags=71%, list=27%, signal=97%
GOBP_CEREBRAL_CORTEX_GABAERGIC_INTERNEURON_MIGRATION	5	-0.358587	-0.666928	0.850716	0.978467	1	5180	tags=60%, list=27%, signal=82%
GOBP_CEREBRAL_CORTEX_REGIONALIZATION	9	-0.532132	-1.11877	0.346895	0.617086	1	1206	tags=22%, list=6%, signal=24%
GOBP_CGMP_MEDIATED_SIGNALING	27	-0.408301	-1.12485	0.296101	0.612126	1	1697	tags=30%, list=9%, signal=32%
GOBP_CHAPERONE_COFACTOR_DEPENDENT_PROTEIN_REFOLDING	33	-0.266672	-0.758968	0.828447	0.949291	1	2610	tags=15%, list=13%, signal=17%
GOBP_CHAPERONE_MEDIATED_AUTOPHAGY	12	-0.755681	-1.72768	0.0147059	0.113141	1	894	tags=42%, list=5%, signal=44%
GOBP_CHAPERONE_MEDIATED_PROTEIN_FOLDING	63	-0.353428	-1.14667	0.227669	0.591994	1	4096	tags=29%, list=21%, signal=36%
GOBP_CHEMOKINE_C_C_MOTIF_LIGAND_5_PRODUCTION	8	-0.478366	-0.9769	0.505519	0.765629	1	439	tags=13%, list=2%, signal=13%
GOBP_CHEMOKINE_C_X_C_MOTIF_LIGAND_1_PRODUCTION	4	-0.716688	-1.26357	0.229299	0.48708	1	5497	tags=100%, list=28%, signal=140%
GOBP_CHEMOKINE_C_X_C_MOTIF_LIGAND_12_SIGNALING_PATHWAY	6	-0.809029	-1.54298	0.0412262	0.273576	1	2000	tags=67%, list=10%, signal=74%
GOBP_CHEMOKINE_C_X_C_MOTIF_LIGAND_2_PRODUCTION	20	-0.603037	-1.53925	0.0428422	0.273331	1	1493	tags=15%, list=8%, signal=16%
GOBP_CHEMOKINE_PRODUCTION	94	-0.492623	-1.69248	0.00108578	0.142409	1	3262	tags=23%, list=17%, signal=28%
GOBP_CHIASMA_ASSEMBLY	5	-0.377174	-0.685616	0.821772	0.974845	1	3540	tags=40%, list=18%, signal=49%
GOBP_CHITIN_METABOLIC_PROCESS	5	-0.574097	-1.04639	0.448913	0.692896	1	904	tags=20%, list=5%, signal=21%
GOBP_CHLORIDE_TRANSPORT	87	-0.320614	-1.09757	0.273927	0.640783	1	1419	tags=11%, list=7%, signal=12%
GOBP_CHOLANGIOCYTE_PROLIFERATION	6	-0.596488	-1.13119	0.350802	0.605122	1	364	tags=17%, list=2%, signal=17%
GOBP_CHOLESTEROL_CATABOLIC_PROCESS	6	-0.82661	-1.59777	0.0233051	0.223584	1	761	tags=50%, list=4%, signal=52%
GOBP_CHOLESTEROL_EFFLUX	45	-0.474737	-1.42822	0.0585729	0.363272	1	3405	tags=33%, list=18%, signal=40%
GOBP_CHOLESTEROL_IMPORT	14	-0.385694	-0.914891	0.584886	0.832891	1	5840	tags=71%, list=30%, signal=102%
GOBP_CHOLESTEROL_STORAGE	20	-0.528378	-1.33085	0.122622	0.433611	1	3335	tags=40%, list=17%, signal=48%
GOBP_CHOLINE_METABOLIC_PROCESS	5	-0.822563	-1.50498	0.052017	0.307491	1	2219	tags=80%, list=11%, signal=90%
GOBP_CHOLINE_TRANSPORT	7	-0.731496	-1.4534	0.0901379	0.348152	1	127	tags=14%, list=1%, signal=14%
GOBP_CHONDROCYTE_DEVELOPMENT_INVOLVED_IN_ENDOCHONDRAL_BONE_MORPHOGENESIS	8	-0.555661	-1.16491	0.301807	0.57515	1	965	tags=25%, list=5%, signal=26%
GOBP_CHONDROCYTE_DIFFERENTIATION_INVOLVED_IN_ENDOCHONDRAL_BONE_MORPHOGENESIS	16	-0.309051	-0.75838	0.777426	0.949711	1	965	tags=13%, list=5%, signal=13%
GOBP_CHONDROITIN_SULFATE_CATABOLIC_PROCESS	5	-0.476347	-0.874056	0.619098	0.869883	1	4518	tags=60%, list=23%, signal=78%
GOBP_CHORIONIC_TROPHOBLAST_CELL_DIFFERENTIATION	6	-0.324298	-0.629602	0.870021	0.982831	1	1332	tags=17%, list=7%, signal=18%
GOBP_CHROMOSOME_LOCALIZATION	107	-0.297048	-1.05238	0.335548	0.688013	1	3790	tags=23%, list=20%, signal=29%
GOBP_CHROMOSOME_SEPARATION	78	-0.193543	-0.649158	0.990364	0.981486	1	3810	tags=15%, list=20%, signal=19%
GOBP_CHRONIC_INFLAMMATORY_RESPONSE	15	-0.451501	-1.0813	0.364416	0.656641	1	4365	tags=47%, list=23%, signal=60%
GOBP_CILIARY_BASAL_BODY_ORGANIZATION	6	-0.589757	-1.14388	0.317023	0.592321	1	2251	tags=33%, list=12%, signal=38%
GOBP_CILIARY_BODY_MORPHOGENESIS	4	-0.584456	-1.01445	0.484881	0.725686	1	5729	tags=75%, list=30%, signal=106%
GOBP_CILIARY_NEUROTROPHIC_FACTOR_MEDIATED_SIGNALING_PATHWAY	5	-0.81396	-1.50437	0.0467091	0.308111	1	1089	tags=40%, list=6%, signal=42%
GOBP_CILIUM_DISASSEMBLY	5	-0.788508	-1.43978	0.0879346	0.357144	1	275	tags=20%, list=1%, signal=20%
GOBP_CITRATE_TRANSPORT	4	-0.825484	-1.42782	0.0870934	0.362969	1	3388	tags=100%, list=17%, signal=121%
GOBP_CLEAVAGE_FURROW_FORMATION	7	-0.718321	-1.43403	0.101147	0.360702	1	2527	tags=57%, list=13%, signal=66%
GOBP_COBALAMIN_METABOLIC_PROCESS	9	-0.514869	-1.09413	0.371204	0.643764	1	3318	tags=33%, list=17%, signal=40%
GOBP_COBALAMIN_TRANSPORT	7	-0.512833	-1.02361	0.46645	0.715379	1	5365	tags=57%, list=28%, signal=79%
GOBP_COBALT_ION_TRANSPORT	6	-0.643621	-1.22984	0.251553	0.520569	1	2080	tags=50%, list=11%, signal=56%
GOBP_COENZYME_A_CATABOLIC_PROCESS	5	-0.566168	-1.03992	0.449561	0.699322	1	3052	tags=40%, list=16%, signal=47%
GOBP_COENZYME_A_METABOLIC_PROCESS	19	-0.30031	-0.754142	0.796199	0.952596	1	732	tags=11%, list=4%, signal=11%
GOBP_COLLAGEN_ACTIVATED_SIGNALING_PATHWAY	15	-0.754176	-1.82624	0.00313152	0.0519172	0.998	2526	tags=40%, list=13%, signal=46%
GOBP_COLLAGEN_ACTIVATED_TYROSINE_KINASE_RECEPTOR_SIGNALING_PATHWAY	11	-0.772936	-1.70518	0.016684	0.132629	1	2288	tags=36%, list=12%, signal=41%
GOBP_COLLAGEN_BIOSYNTHETIC_PROCESS	56	-0.515392	-1.61735	0.00110988	0.210531	1	4064	tags=46%, list=21%, signal=59%
GOBP_COLLAGEN_CATABOLIC_PROCESS	29	-0.430117	-1.18554	0.225322	0.553781	1	4734	tags=52%, list=24%, signal=68%
GOBP_COLLAGEN_FIBRIL_ORGANIZATION	57	-0.357166	-1.12457	0.275825	0.611785	1	3476	tags=26%, list=18%, signal=32%
GOBP_COLLAGEN_METABOLIC_PROCESS	103	-0.439068	-1.54493	0.00220022	0.274129	1	4064	tags=40%, list=21%, signal=50%
GOBP_COLLATERAL_SPROUTING	32	-0.353576	-1.00551	0.450164	0.736498	1	690	tags=19%, list=4%, signal=19%
GOBP_COLUMNAR_CUBOIDAL_EPITHELIAL_CELL_DIFFERENTIATION	112	-0.253991	-0.894408	0.694537	0.85059	1	1038	tags=10%, list=5%, signal=10%
GOBP_COMMA_SHAPED_BODY_MORPHOGENESIS	5	-0.774617	-1.40518	0.117078	0.375633	1	3836	tags=60%, list=20%, signal=75%
GOBP_COMMISSURAL_NEURON_AXON_GUIDANCE	13	-0.43631	-1.01886	0.4375	0.720006	1	1990	tags=31%, list=10%, signal=34%
GOBP_COMMITMENT_OF_NEURONAL_CELL_TO_SPECIFIC_NEURON_TYPE_IN_FOREBRAIN	6	-0.498276	-0.965004	0.516667	0.778421	1	256	tags=17%, list=1%, signal=17%
GOBP_COMMON_BILE_DUCT_DEVELOPMENT	7	-0.743777	-1.48471	0.0607966	0.324714	1	1521	tags=57%, list=8%, signal=62%
GOBP_COMMON_MYELOID_PROGENITOR_CELL_PROLIFERATION	11	-0.516827	-1.13716	0.318856	0.599904	1	3443	tags=55%, list=18%, signal=66%
GOBP_COMPLEMENT_ACTIVATION	40	-0.550617	-1.63904	0.0131148	0.185847	1	3579	tags=43%, list=18%, signal=52%
GOBP_COMPLEMENT_ACTIVATION_ALTERNATIVE_PATHWAY	8	-0.377171	-0.766826	0.742857	0.945352	1	3301	tags=38%, list=17%, signal=45%
GOBP_COMPLEMENT_ACTIVATION_CLASSICAL_PATHWAY	25	-0.543377	-1.45785	0.0576307	0.347355	1	3493	tags=44%, list=18%, signal=54%
GOBP_COMPLEMENT_ACTIVATION_LECTIN_PATHWAY	7	-0.640979	-1.26268	0.216301	0.487784	1	1233	tags=29%, list=6%, signal=31%
GOBP_COMPLEMENT_RECEPTOR_MEDIATED_SIGNALING_PATHWAY	5	-0.802575	-1.49952	0.0590095	0.311145	1	145	tags=20%, list=1%, signal=20%
GOBP_CONNECTIVE_TISSUE_REPLACEMENT_INVOLVED_IN_INFLAMMATORY_RESPONSE_WOUND_HEALING	6	-0.430143	-0.838984	0.644302	0.896282	1	516	tags=17%, list=3%, signal=17%
GOBP_CONVERGENT_EXTENSION	15	-0.405238	-0.973106	0.498952	0.77006	1	345	tags=13%, list=2%, signal=14%
GOBP_CONVERGENT_EXTENSION_INVOLVED_IN_AXIS_ELONGATION	9	-0.695352	-1.47812	0.0645503	0.328987	1	345	tags=22%, list=2%, signal=23%
GOBP_COPI_COATED_VESICLE_BUDDING	6	-0.687378	-1.31494	0.166495	0.444747	1	3048	tags=50%, list=16%, signal=59%
GOBP_COPII_COATED_VESICLE_CARGO_LOADING	15	-0.293531	-0.69486	0.844305	0.974303	1	2324	tags=20%, list=12%, signal=23%
GOBP_COPPER_ION_HOMEOSTASIS	16	-0.412031	-0.99903	0.451104	0.74242	1	1889	tags=19%, list=10%, signal=21%
GOBP_COPPER_ION_IMPORT	8	-0.684368	-1.40668	0.121212	0.373269	1	2858	tags=50%, list=15%, signal=59%
GOBP_COPPER_ION_TRANSMEMBRANE_TRANSPORT	7	-0.731917	-1.47027	0.0868644	0.336454	1	1834	tags=43%, list=9%, signal=47%
GOBP_COPPER_ION_TRANSPORT	15	-0.72445	-1.72658	0.00847458	0.112328	1	3403	tags=60%, list=18%, signal=73%
GOBP_CORNEA_DEVELOPMENT_IN_CAMERA_TYPE_EYE	8	-0.538097	-1.11877	0.350622	0.617272	1	1791	tags=25%, list=9%, signal=28%
GOBP_CORNIFIED_ENVELOPE_ASSEMBLY	7	-0.626105	-1.2493	0.226333	0.50055	1	1322	tags=29%, list=7%, signal=31%
GOBP_CORONARY_ARTERY_MORPHOGENESIS	9	-0.342804	-0.739723	0.763636	0.958572	1	1964	tags=22%, list=10%, signal=25%
GOBP_CORONARY_VASCULATURE_DEVELOPMENT	68	-0.382036	-1.25773	0.127083	0.49237	1	2097	tags=24%, list=11%, signal=26%
GOBP_CORONARY_VASCULATURE_MORPHOGENESIS	29	-0.457801	-1.27487	0.14978	0.477877	1	2097	tags=31%, list=11%, signal=35%
GOBP_CORTICAL_ACTIN_CYTOSKELETON_ORGANIZATION	41	-0.344812	-1.01938	0.429967	0.719308	1	2457	tags=24%, list=13%, signal=28%
GOBP_CORTICAL_CYTOSKELETON_ORGANIZATION	52	-0.348208	-1.0707	0.341357	0.667378	1	1544	tags=15%, list=8%, signal=17%
GOBP_CORTICOSPINAL_TRACT_MORPHOGENESIS	10	-0.383979	-0.831843	0.677039	0.902908	1	117	tags=10%, list=1%, signal=10%
GOBP_CORTICOSTEROID_HORMONE_SECRETION	21	-0.367103	-0.942416	0.531422	0.806635	1	4669	tags=43%, list=24%, signal=56%
GOBP_CORTICOSTERONE_SECRETION	9	-0.290955	-0.621632	0.904564	0.983245	1	842	tags=11%, list=4%, signal=12%
GOBP_CORTICOTROPIN_SECRETION	9	-0.610478	-1.27	0.204819	0.483205	1	1183	tags=33%, list=6%, signal=35%
GOBP_CORTISOL_BIOSYNTHETIC_PROCESS	8	-0.31276	-0.661237	0.864035	0.979371	1	4117	tags=38%, list=21%, signal=48%
GOBP_CORTISOL_METABOLIC_PROCESS	9	-0.327664	-0.697256	0.825545	0.974584	1	4760	tags=44%, list=25%, signal=59%
GOBP_CORTISOL_SECRETION	4	-0.468239	-0.820318	0.684426	0.911748	1	3675	tags=50%, list=19%, signal=62%
GOBP_CRANIAL_NERVE_DEVELOPMENT	45	-0.422598	-1.26154	0.148959	0.488334	1	805	tags=18%, list=4%, signal=19%
GOBP_CRANIAL_NERVE_FORMATION	7	-0.234744	-0.467366	0.989669	0.998019	1	5404	tags=29%, list=28%, signal=40%
GOBP_CRANIAL_SKELETAL_SYSTEM_DEVELOPMENT	71	-0.328515	-1.08168	0.31741	0.656298	1	1964	tags=17%, list=10%, signal=19%
GOBP_CRANIAL_SUTURE_MORPHOGENESIS	7	-0.773347	-1.56551	0.032563	0.255508	1	246	tags=29%, list=1%, signal=29%
GOBP_CRANIOFACIAL_SUTURE_MORPHOGENESIS	16	-0.615072	-1.48406	0.0661522	0.324716	1	263	tags=19%, list=1%, signal=19%
GOBP_CRISTAE_FORMATION	18	-0.391544	-0.981939	0.478689	0.759091	1	3525	tags=28%, list=18%, signal=34%
GOBP_CUT_CATABOLIC_PROCESS	5	-0.357202	-0.654057	0.853838	0.980778	1	12466	tags=100%, list=64%, signal=280%
GOBP_CYCLIC_GMP_AMP_TRANSMEMBRANE_IMPORT_ACROSS_PLASMA_MEMBRANE	3	-0.825158	-1.34177	0.122574	0.422863	1	2905	tags=67%, list=15%, signal=78%
GOBP_CYCLIC_NUCLEOTIDE_CATABOLIC_PROCESS	6	-0.469158	-0.895813	0.580508	0.849088	1	35	tags=17%, list=0%, signal=17%
GOBP_CYCLIC_NUCLEOTIDE_TRANSPORT	6	-0.539479	-1.03353	0.451472	0.705281	1	2905	tags=33%, list=15%, signal=39%
GOBP_CYSTEINE_METABOLIC_PROCESS	10	-0.520921	-1.12999	0.311458	0.606193	1	4029	tags=40%, list=21%, signal=50%
GOBP_CYTIDINE_TO_URIDINE_EDITING	3	-0.303776	-0.493864	0.967842	0.9979	1	13501	tags=100%, list=70%, signal=329%
GOBP_CYTOCHROME_COMPLEX_ASSEMBLY	33	-0.288115	-0.82238	0.74115	0.90975	1	5996	tags=48%, list=31%, signal=70%
GOBP_CYTOKINE_MEDIATED_SIGNALING_PATHWAY	332	-0.220739	-0.89204	0.809195	0.852235	1	2332	tags=13%, list=12%, signal=15%
GOBP_CYTOKINE_PRODUCTION_INVOLVED_IN_IMMUNE_RESPONSE	124	-0.483017	-1.73962	0	0.105435	1	4461	tags=43%, list=23%, signal=55%
GOBP_CYTOKINE_PRODUCTION_INVOLVED_IN_INFLAMMATORY_RESPONSE	54	-0.337094	-1.06315	0.35544	0.674189	1	375	tags=6%, list=2%, signal=6%
GOBP_CYTOKINETIC_PROCESS	41	-0.383344	-1.14621	0.248672	0.591672	1	3790	tags=29%, list=20%, signal=36%
GOBP_CYTOPLASMIC_SEQUESTERING_OF_PROTEIN	23	-0.303661	-0.804734	0.746082	0.921537	1	119	tags=4%, list=1%, signal=4%
GOBP_CYTOPLASMIC_TRANSLATION	141	-0.55582	-2.04256	0	0.00291426	0.1285	3130	tags=43%, list=16%, signal=51%	translation
GOBP_CYTOPLASMIC_TRANSLATIONAL_ELONGATION	5	-0.283946	-0.529851	0.951579	0.994464	1	13886	tags=100%, list=72%, signal=352%
GOBP_CYTOSKELETON_DEPENDENT_CYTOKINESIS	105	-0.29262	-1.02746	0.397765	0.711597	1	2867	tags=20%, list=15%, signal=23%
GOBP_CYTOSOLIC_PATTERN_RECOGNITION_RECEPTOR_SIGNALING_PATHWAY	128	-0.214922	-0.773482	0.944505	0.943384	1	3514	tags=21%, list=18%, signal=26%
GOBP_CYTOSOLIC_RIBOSOME_ASSEMBLY	6	-0.310306	-0.604338	0.904615	0.98708	1	6384	tags=83%, list=33%, signal=124%
GOBP_D_AMINO_ACID_TRANSPORT	8	-0.712935	-1.46714	0.0618997	0.341815	1	407	tags=25%, list=2%, signal=26%
GOBP_D_ASPARTATE_IMPORT_ACROSS_PLASMA_MEMBRANE	6	-0.739044	-1.40371	0.0877378	0.376815	1	12	tags=17%, list=0%, signal=17%
GOBP_DAMP_METABOLIC_PROCESS	8	-0.450572	-0.934735	0.533835	0.815252	1	661	tags=25%, list=3%, signal=26%
GOBP_DCMP_CATABOLIC_PROCESS	8	-0.278736	-0.573385	0.935829	0.989752	1	4540	tags=25%, list=23%, signal=33%
GOBP_DE_NOVO_AMP_BIOSYNTHETIC_PROCESS	8	-0.587361	-1.20876	0.271682	0.535508	1	81	tags=13%, list=0%, signal=13%
GOBP_DE_NOVO_CENTRIOLE_ASSEMBLY	5	-0.511529	-0.929361	0.583857	0.819963	1	3358	tags=40%, list=17%, signal=48%
GOBP_DE_NOVO_CENTRIOLE_ASSEMBLY_INVOLVED_IN_MULTI_CILIATED_EPITHELIAL_CELL_DIFFERENTIATION	5	-0.511529	-0.934582	0.567797	0.815248	1	3358	tags=40%, list=17%, signal=48%
GOBP_DE_NOVO_PROTEIN_FOLDING	39	-0.278373	-0.826304	0.748307	0.90794	1	4096	tags=26%, list=21%, signal=32%
GOBP_DEDIFFERENTIATION	7	-0.723721	-1.44389	0.100216	0.354559	1	3705	tags=57%, list=19%, signal=71%
GOBP_DEFENSE_RESPONSE_TO_BACTERIUM	195	-0.378326	-1.43558	0.00536481	0.358897	1	3104	tags=24%, list=16%, signal=28%
GOBP_DEFENSE_RESPONSE_TO_GRAM_NEGATIVE_BACTERIUM	51	-0.403066	-1.2496	0.157292	0.501415	1	2918	tags=27%, list=15%, signal=32%
GOBP_DEFENSE_RESPONSE_TO_GRAM_POSITIVE_BACTERIUM	80	-0.429233	-1.44289	0.0265487	0.3546	1	4903	tags=44%, list=25%, signal=58%
GOBP_DEFENSE_RESPONSE_TO_SYMBIONT	266	-0.196383	-0.778397	0.991973	0.941731	1	2564	tags=13%, list=13%, signal=15%
GOBP_DENDRITIC_CELL_ANTIGEN_PROCESSING_AND_PRESENTATION	9	-0.513582	-1.07684	0.381877	0.661588	1	2867	tags=33%, list=15%, signal=39%
GOBP_DENDRITIC_CELL_CHEMOTAXIS	13	-0.496061	-1.15088	0.299454	0.587527	1	3591	tags=46%, list=19%, signal=57%
GOBP_DENDRITIC_CELL_CYTOKINE_PRODUCTION	17	-0.435809	-1.07376	0.366771	0.664591	1	4121	tags=29%, list=21%, signal=37%
GOBP_DENDRITIC_CELL_DIFFERENTIATION	33	-0.355902	-1.00579	0.431414	0.736003	1	3682	tags=36%, list=19%, signal=45%
GOBP_DENDRITIC_CELL_MIGRATION	19	-0.304161	-0.778223	0.778502	0.941636	1	3591	tags=32%, list=19%, signal=39%
GOBP_DEOXYINOSINE_METABOLIC_PROCESS	4	-0.676065	-1.18142	0.291405	0.557839	1	254	tags=25%, list=1%, signal=25%
GOBP_DEOXYRIBONUCLEOSIDE_MONOPHOSPHATE_BIOSYNTHETIC_PROCESS	9	-0.61932	-1.32123	0.182377	0.439296	1	910	tags=22%, list=5%, signal=23%
GOBP_DERMATAN_SULFATE_PROTEOGLYCAN_BIOSYNTHETIC_PROCESS	5	-0.477344	-0.883984	0.60262	0.85982	1	4973	tags=60%, list=26%, signal=81%
GOBP_DETECTION_OF_CHEMICAL_STIMULUS_INVOLVED_IN_SENSORY_PERCEPTION_OF_TASTE	8	-0.635492	-1.33879	0.167026	0.425368	1	1618	tags=25%, list=8%, signal=27%
GOBP_DETECTION_OF_MECHANICAL_STIMULUS_INVOLVED_IN_SENSORY_PERCEPTION_OF_SOUND	17	-0.368256	-0.900607	0.594484	0.846129	1	2524	tags=24%, list=13%, signal=27%
GOBP_DETECTION_OF_OTHER_ORGANISM	15	-0.285572	-0.676459	0.871541	0.977376	1	1289	tags=13%, list=7%, signal=14%
GOBP_DETECTION_OF_VIRUS	3	-0.79769	-1.29733	0.180873	0.45635	1	354	tags=33%, list=2%, signal=34%
GOBP_DETECTION_OF_VISIBLE_LIGHT	22	-0.301487	-0.777495	0.768332	0.941991	1	1771	tags=23%, list=9%, signal=25%
GOBP_DETERMINATION_OF_LEFT_RIGHT_ASYMMETRY_IN_LATERAL_MESODERM	8	-0.516873	-1.05984	0.399351	0.67842	1	3555	tags=38%, list=18%, signal=46%
GOBP_DETOXIFICATION	60	-0.429444	-1.38495	0.0493119	0.391013	1	3379	tags=33%, list=17%, signal=40%
GOBP_DETOXIFICATION_OF_COPPER_ION	6	-0.77379	-1.48307	0.0614125	0.325985	1	3379	tags=67%, list=17%, signal=81%
GOBP_DETOXIFICATION_OF_INORGANIC_COMPOUND	12	-0.596193	-1.37267	0.126316	0.398105	1	3379	tags=50%, list=17%, signal=61%
GOBP_DEVELOPMENT_OF_PRIMARY_MALE_SEXUAL_CHARACTERISTICS	105	-0.248729	-0.871827	0.724138	0.871533	1	2604	tags=16%, list=13%, signal=19%
GOBP_DEVELOPMENTAL_INDUCTION	34	-0.315974	-0.902468	0.598639	0.844242	1	961	tags=12%, list=5%, signal=12%
GOBP_DEVELOPMENTAL_PIGMENTATION	49	-0.498383	-1.54425	0.0227508	0.273592	1	1770	tags=20%, list=9%, signal=22%
GOBP_DIACYLGLYCEROL_BIOSYNTHETIC_PROCESS	8	-0.465567	-0.96612	0.501109	0.776435	1	3138	tags=38%, list=16%, signal=45%
GOBP_DIACYLGLYCEROL_CATABOLIC_PROCESS	5	-0.490762	-0.882777	0.618462	0.860994	1	3405	tags=40%, list=18%, signal=49%
GOBP_DIADENOSINE_POLYPHOSPHATE_CATABOLIC_PROCESS	5	-0.567837	-1.03507	0.468153	0.704308	1	233	tags=20%, list=1%, signal=20%
GOBP_DIADENOSINE_POLYPHOSPHATE_METABOLIC_PROCESS	8	-0.368201	-0.751402	0.770042	0.954495	1	233	tags=13%, list=1%, signal=13%
GOBP_DIAPEDESIS	7	-0.443751	-0.874555	0.616483	0.869724	1	235	tags=14%, list=1%, signal=14%
GOBP_DICARBOXYLIC_ACID_CATABOLIC_PROCESS	17	-0.562996	-1.39911	0.101387	0.379406	1	2875	tags=35%, list=15%, signal=41%
GOBP_DICARBOXYLIC_ACID_METABOLIC_PROCESS	84	-0.460821	-1.56553	0.00944386	0.255903	1	3232	tags=26%, list=17%, signal=31%
GOBP_DICARBOXYLIC_ACID_TRANSPORT	87	-0.361493	-1.23602	0.108018	0.513023	1	2905	tags=23%, list=15%, signal=27%
GOBP_DIENCEPHALON_DEVELOPMENT	61	-0.310359	-0.997961	0.457113	0.743382	1	3701	tags=30%, list=19%, signal=36%
GOBP_DIENCEPHALON_MORPHOGENESIS	4	-0.588599	-1.01689	0.496822	0.722537	1	2524	tags=50%, list=13%, signal=57%
GOBP_DIET_INDUCED_THERMOGENESIS	13	-0.54812	-1.26619	0.196391	0.486008	1	1433	tags=23%, list=7%, signal=25%
GOBP_DIGESTION	88	-0.360234	-1.2375	0.132214	0.512457	1	1283	tags=18%, list=7%, signal=19%
GOBP_DIGESTIVE_SYSTEM_DEVELOPMENT	112	-0.303392	-1.07816	0.286938	0.660755	1	2044	tags=18%, list=11%, signal=20%
GOBP_DIGESTIVE_TRACT_MORPHOGENESIS	44	-0.391974	-1.1908	0.194969	0.549824	1	3129	tags=30%, list=16%, signal=35%
GOBP_DIOL_BIOSYNTHETIC_PROCESS	21	-0.69408	-1.78235	0.00530786	0.0756019	1	3891	tags=52%, list=20%, signal=65%
GOBP_DIOL_METABOLIC_PROCESS	29	-0.677764	-1.85136	0	0.0411952	0.99	1478	tags=28%, list=8%, signal=30%
GOBP_DIPHOSPHATE_METABOLIC_PROCESS	5	-0.820414	-1.49025	0.0558943	0.31912	1	1315	tags=60%, list=7%, signal=64%
GOBP_DIRECT_OSSIFICATION	6	-0.425883	-0.808409	0.696133	0.920518	1	1528	tags=17%, list=8%, signal=18%
GOBP_DISACCHARIDE_METABOLIC_PROCESS	4	-0.262358	-0.45358	0.987667	0.998183	1	3036	tags=25%, list=16%, signal=30%
GOBP_DISRUPTION_OF_ANATOMICAL_STRUCTURE_IN_ANOTHER_ORGANISM	48	-0.204073	-0.628419	0.979638	0.982752	1	5238	tags=31%, list=27%, signal=43%
GOBP_DNA_BIOSYNTHETIC_PROCESS	175	-0.207918	-0.778314	0.95914	0.941675	1	2243	tags=13%, list=12%, signal=15%
GOBP_DNA_DAMAGE_RESPONSE_SIGNAL_TRANSDUCTION_BY_P53_CLASS_MEDIATOR	65	-0.37866	-1.22296	0.148982	0.525111	1	1715	tags=15%, list=9%, signal=17%
GOBP_DNA_DAMAGE_RESPONSE_SIGNAL_TRANSDUCTION_BY_P53_CLASS_MEDIATOR_RESULTING_IN_CELL_CYCLE_ARREST	12	-0.556843	-1.2595	0.210929	0.490777	1	1158	tags=17%, list=6%, signal=18%
GOBP_DNA_DAMAGE_RESPONSE_SIGNAL_TRANSDUCTION_RESULTING_IN_TRANSCRIPTION	20	-0.662849	-1.70828	0.0140693	0.128759	1	1715	tags=30%, list=9%, signal=33%
GOBP_DNA_DEAMINATION	6	-0.328026	-0.631066	0.89501	0.982562	1	4623	tags=33%, list=24%, signal=44%
GOBP_DNA_LIGATION	12	-0.414394	-0.947613	0.513227	0.800935	1	2962	tags=25%, list=15%, signal=29%
GOBP_DNA_LIGATION_INVOLVED_IN_DNA_REPAIR	5	-0.583923	-1.07142	0.412748	0.666614	1	335	tags=20%, list=2%, signal=20%
GOBP_DNA_METHYLATION_DEPENDENT_HETEROCHROMATIN_FORMATION	29	-0.197922	-0.541855	0.991407	0.99402	1	5648	tags=31%, list=29%, signal=44%
GOBP_DNA_REPAIR_DEPENDENT_CHROMATIN_REMODELING	21	-0.28856	-0.748061	0.81962	0.955609	1	2850	tags=29%, list=15%, signal=33%
GOBP_DNA_REPLICATION_CHECKPOINT_SIGNALING	14	-0.366202	-0.864243	0.631521	0.877482	1	2519	tags=21%, list=13%, signal=25%
GOBP_DNA_REPLICATION_DEPENDENT_CHROMATIN_ASSEMBLY	6	-0.248708	-0.472603	0.981441	0.997767	1	4598	tags=33%, list=24%, signal=44%
GOBP_DNA_REPLICATION_SYNTHESIS_OF_RNA_PRIMER	5	-0.375877	-0.683465	0.826902	0.975383	1	12104	tags=100%, list=62%, signal=266%
GOBP_DNA_STRAND_ELONGATION_INVOLVED_IN_DNA_REPLICATION	13	-0.2045	-0.475333	0.989474	0.997917	1	4653	tags=23%, list=24%, signal=30%
GOBP_DNA_UNWINDING_INVOLVED_IN_DNA_REPLICATION	20	-0.287471	-0.734716	0.826226	0.959993	1	3732	tags=25%, list=19%, signal=31%
GOBP_DOPAMINE_BIOSYNTHETIC_PROCESS	15	-0.463662	-1.11531	0.317098	0.62099	1	2125	tags=27%, list=11%, signal=30%
GOBP_DOPAMINE_METABOLIC_PROCESS	44	-0.322511	-0.978093	0.491266	0.764762	1	1371	tags=14%, list=7%, signal=15%
GOBP_DORSAL_AORTA_DEVELOPMENT	10	-0.819587	-1.79537	0.00214133	0.0666869	1	2097	tags=40%, list=11%, signal=45%
GOBP_DORSAL_AORTA_MORPHOGENESIS	8	-0.762866	-1.57489	0.0393782	0.245898	1	2097	tags=38%, list=11%, signal=42%
GOBP_DORSAL_VENTRAL_AXIS_SPECIFICATION	12	-0.372627	-0.847409	0.674711	0.889986	1	326	tags=8%, list=2%, signal=8%
GOBP_DORSAL_VENTRAL_NEURAL_TUBE_PATTERNING	28	-0.325152	-0.887857	0.598901	0.855877	1	1990	tags=21%, list=10%, signal=24%
GOBP_DOUBLE_STRAND_BREAK_REPAIR_INVOLVED_IN_MEIOTIC_RECOMBINATION	10	-0.392372	-0.842972	0.667699	0.893002	1	3540	tags=40%, list=18%, signal=49%
GOBP_DOUBLE_STRAND_BREAK_REPAIR_VIA_BREAK_INDUCED_REPLICATION	12	-0.311885	-0.725025	0.792123	0.963493	1	4509	tags=33%, list=23%, signal=43%
GOBP_DOUBLE_STRAND_BREAK_REPAIR_VIA_NONHOMOLOGOUS_END_JOINING	61	-0.201932	-0.650922	0.982684	0.98107	1	4198	tags=25%, list=22%, signal=31%
GOBP_DOUBLE_STRAND_BREAK_REPAIR_VIA_SINGLE_STRAND_ANNEALING	7	-0.225508	-0.453892	0.990918	0.998301	1	2984	tags=14%, list=15%, signal=17%
GOBP_DOUBLE_STRAND_BREAK_REPAIR_VIA_SYNTHESIS_DEPENDENT_STRAND_ANNEALING	9	-0.318627	-0.675293	0.845147	0.977186	1	3801	tags=33%, list=20%, signal=41%
GOBP_DRINKING_BEHAVIOR	12	-0.361807	-0.817238	0.697972	0.914254	1	1992	tags=33%, list=10%, signal=37%
GOBP_DTMP_BIOSYNTHETIC_PROCESS	5	-0.735892	-1.3451	0.157173	0.419836	1	3809	tags=40%, list=20%, signal=50%
GOBP_DTMP_METABOLIC_PROCESS	12	-0.41455	-0.941674	0.537806	0.807319	1	4540	tags=25%, list=23%, signal=33%
GOBP_DUMP_METABOLIC_PROCESS	8	-0.423756	-0.883158	0.603209	0.861085	1	4540	tags=38%, list=23%, signal=49%
GOBP_EAR_MORPHOGENESIS	117	-0.36543	-1.31055	0.0507012	0.44567	1	2951	tags=26%, list=15%, signal=31%
GOBP_ECTODERM_DEVELOPMENT	16	-0.358766	-0.872821	0.615302	0.870528	1	1990	tags=19%, list=10%, signal=21%
GOBP_ECTOPIC_GERM_CELL_PROGRAMMED_CELL_DEATH	16	-0.47914	-1.17336	0.264706	0.567649	1	2878	tags=25%, list=15%, signal=29%
GOBP_ELASTIC_FIBER_ASSEMBLY	11	-0.406757	-0.901271	0.574446	0.845699	1	1670	tags=18%, list=9%, signal=20%
GOBP_ELASTIN_METABOLIC_PROCESS	6	-0.600112	-1.14698	0.330819	0.591675	1	1103	tags=33%, list=6%, signal=35%
GOBP_ELECTRON_TRANSPORT_CHAIN	108	-0.552344	-1.97284	0	0.008956	0.437	3909	tags=53%, list=20%, signal=66%	oxidative phosphorylation
GOBP_EMBRYO_IMPLANTATION	48	-0.3439	-1.0529	0.364562	0.687493	1	1148	tags=13%, list=6%, signal=13%
GOBP_EMBRYONIC_CAMERA_TYPE_EYE_DEVELOPMENT	39	-0.284932	-0.849019	0.724435	0.888623	1	1448	tags=13%, list=7%, signal=14%
GOBP_EMBRYONIC_CAMERA_TYPE_EYE_FORMATION	10	-0.527766	-1.16506	0.286174	0.575209	1	1178	tags=30%, list=6%, signal=32%
GOBP_EMBRYONIC_CRANIAL_SKELETON_MORPHOGENESIS	46	-0.322762	-0.981509	0.4791	0.759775	1	1964	tags=17%, list=10%, signal=19%
GOBP_EMBRYONIC_DIGESTIVE_TRACT_DEVELOPMENT	29	-0.435146	-1.20362	0.20406	0.54094	1	3129	tags=34%, list=16%, signal=41%
GOBP_EMBRYONIC_DIGESTIVE_TRACT_MORPHOGENESIS	16	-0.637312	-1.54838	0.0437045	0.271286	1	3129	tags=38%, list=16%, signal=45%
GOBP_EMBRYONIC_HEMOPOIESIS	28	-0.390239	-1.09079	0.334746	0.645419	1	2529	tags=25%, list=13%, signal=29%
GOBP_EMBRYONIC_HINDGUT_MORPHOGENESIS	3	-0.785191	-1.27257	0.182	0.48003	1	3129	tags=67%, list=16%, signal=79%
GOBP_EMBRYONIC_NEUROCRANIUM_MORPHOGENESIS	8	-0.650236	-1.36134	0.130297	0.404544	1	968	tags=25%, list=5%, signal=26%
GOBP_EMBRYONIC_ORGAN_DEVELOPMENT	430	-0.254848	-1.05912	0.259953	0.679454	1	2649	tags=18%, list=14%, signal=20%
GOBP_EMBRYONIC_ORGAN_MORPHOGENESIS	261	-0.271445	-1.06902	0.275824	0.667987	1	2951	tags=20%, list=15%, signal=24%
GOBP_EMBRYONIC_PLACENTA_DEVELOPMENT	95	-0.308386	-1.07728	0.311897	0.661912	1	1148	tags=13%, list=6%, signal=13%
GOBP_EMBRYONIC_PLACENTA_MORPHOGENESIS	29	-0.34753	-0.964089	0.501591	0.779346	1	1007	tags=10%, list=5%, signal=11%
GOBP_ENAMEL_MINERALIZATION	15	-0.650409	-1.54577	0.0499457	0.273454	1	1964	tags=40%, list=10%, signal=44%
GOBP_ENDOCARDIAL_CELL_DIFFERENTIATION	6	-0.617449	-1.18062	0.288725	0.55866	1	1521	tags=33%, list=8%, signal=36%
GOBP_ENDOCARDIAL_CUSHION_DEVELOPMENT	49	-0.378219	-1.17481	0.210699	0.566531	1	3217	tags=27%, list=17%, signal=32%
GOBP_ENDOCARDIAL_CUSHION_FORMATION	29	-0.360858	-1.00154	0.451681	0.73986	1	3217	tags=28%, list=17%, signal=33%
GOBP_ENDOCARDIAL_CUSHION_FUSION	4	-0.343296	-0.604268	0.888186	0.986956	1	6324	tags=75%, list=33%, signal=111%
GOBP_ENDOCARDIAL_CUSHION_MORPHOGENESIS	39	-0.394419	-1.17358	0.234727	0.567556	1	3217	tags=26%, list=17%, signal=31%
GOBP_ENDOCARDIAL_CUSHION_TO_MESENCHYMAL_TRANSITION	7	-0.793635	-1.59872	0.0299278	0.223772	1	2097	tags=43%, list=11%, signal=48%
GOBP_ENDOCARDIUM_DEVELOPMENT	13	-0.562866	-1.31123	0.166492	0.445551	1	1521	tags=31%, list=8%, signal=33%
GOBP_ENDOCARDIUM_MORPHOGENESIS	7	-0.653802	-1.28751	0.219235	0.463784	1	1521	tags=43%, list=8%, signal=46%
GOBP_ENDOCHONDRAL_BONE_MORPHOGENESIS	64	-0.299649	-0.950483	0.555556	0.799538	1	3203	tags=28%, list=17%, signal=34%
GOBP_ENDOCRINE_HORMONE_SECRETION	59	-0.404771	-1.28591	0.0954879	0.465387	1	1257	tags=20%, list=6%, signal=22%
GOBP_ENDOCRINE_PANCREAS_DEVELOPMENT	39	-0.315808	-0.930714	0.558952	0.81877	1	961	tags=13%, list=5%, signal=13%
GOBP_ENDOCRINE_PROCESS	88	-0.345208	-1.17162	0.173959	0.569046	1	1257	tags=17%, list=6%, signal=18%
GOBP_ENDOCYTOSIS_INVOLVED_IN_VIRAL_ENTRY_INTO_HOST_CELL	10	-0.488845	-1.04747	0.415778	0.691781	1	4740	tags=70%, list=24%, signal=93%
GOBP_ENDODERMAL_CELL_FATE_COMMITMENT	10	-0.432285	-0.956683	0.508715	0.790368	1	4550	tags=40%, list=23%, signal=52%
GOBP_ENDODERMAL_CELL_FATE_SPECIFICATION	4	-0.76554	-1.31277	0.171548	0.445397	1	4550	tags=100%, list=23%, signal=131%
GOBP_ENDONUCLEOLYTIC_CLEAVAGE_IN_5_ETS_OF_TRICISTRONIC_RRNA_TRANSCRIPT_SSU_RRNA_5_8S_RRNA_LSU_RRNA	6	-0.424362	-0.808889	0.698936	0.920245	1	7500	tags=67%, list=39%, signal=109%
GOBP_ENDONUCLEOLYTIC_CLEAVAGE_IN_ITS1_TO_SEPARATE_SSU_RRNA_FROM_5_8S_RRNA_AND_LSU_RRNA_FROM_TRICISTRONIC_RRNA_TRANSCRIPT_SSU_RRNA_5_8S_RRNA_LSU_RRNA	8	-0.549955	-1.14976	0.323958	0.588582	1	4139	tags=50%, list=21%, signal=64%
GOBP_ENDONUCLEOLYTIC_CLEAVAGE_OF_TRICISTRONIC_RRNA_TRANSCRIPT_SSU_RRNA_5_8S_RRNA_LSU_RRNA	16	-0.325338	-0.782299	0.75	0.939679	1	6592	tags=44%, list=34%, signal=66%
GOBP_ENDOPLASMIC_RETICULUM_CALCIUM_ION_HOMEOSTASIS	29	-0.434267	-1.22325	0.192719	0.524895	1	2501	tags=31%, list=13%, signal=36%
GOBP_ENDOPLASMIC_RETICULUM_TO_CYTOSOL_TRANSPORT	26	-0.291763	-0.77704	0.801075	0.941943	1	4259	tags=31%, list=22%, signal=39%
GOBP_ENDOPLASMIC_RETICULUM_UNFOLDED_PROTEIN_RESPONSE	67	-0.259197	-0.842799	0.747323	0.893158	1	2610	tags=15%, list=13%, signal=17%
GOBP_ENDOSOME_TO_LYSOSOME_TRANSPORT_VIA_MULTIVESICULAR_BODY_SORTING_PATHWAY	16	-0.374666	-0.913676	0.583512	0.833362	1	3790	tags=31%, list=20%, signal=39%
GOBP_ENDOTHELIAL_CELL_APOPTOTIC_PROCESS	47	-0.319347	-0.97159	0.487856	0.771016	1	1896	tags=21%, list=10%, signal=24%
GOBP_ENDOTHELIAL_CELL_CHEMOTAXIS	28	-0.465351	-1.32145	0.109226	0.439554	1	2225	tags=36%, list=11%, signal=40%
GOBP_ENDOTHELIAL_CELL_DEVELOPMENT	65	-0.485453	-1.56018	0.0127932	0.261003	1	649	tags=20%, list=3%, signal=21%
GOBP_ENDOTHELIAL_CELL_FATE_COMMITMENT	6	-0.768492	-1.50206	0.0714286	0.30936	1	3397	tags=50%, list=18%, signal=61%
GOBP_ENDOTHELIAL_CELL_MATRIX_ADHESION	6	-0.743277	-1.42858	0.114464	0.362741	1	3821	tags=50%, list=20%, signal=62%
GOBP_ENDOTHELIAL_CELL_MATRIX_ADHESION_VIA_FIBRONECTIN	4	-0.649747	-1.12375	0.375264	0.612179	1	3821	tags=50%, list=20%, signal=62%
GOBP_ENDOTHELIAL_CELL_MIGRATION	212	-0.311706	-1.21061	0.0773362	0.534854	1	3508	tags=30%, list=18%, signal=36%
GOBP_ENDOTHELIAL_CELL_MORPHOGENESIS	14	-0.704682	-1.6728	0.0104603	0.155511	1	2086	tags=50%, list=11%, signal=56%
GOBP_ENDOTHELIAL_CELL_PROLIFERATION	148	-0.311046	-1.14435	0.170492	0.591413	1	2086	tags=20%, list=11%, signal=22%
GOBP_ENDOTHELIUM_DEVELOPMENT	126	-0.393437	-1.41704	0.0212089	0.369451	1	2097	tags=21%, list=11%, signal=24%
GOBP_ENERGY_COUPLED_PROTON_TRANSMEMBRANE_TRANSPORT_AGAINST_ELECTROCHEMICAL_GRADIENT	5	-0.721218	-1.29652	0.186047	0.457493	1	4142	tags=80%, list=21%, signal=102%
GOBP_ENERGY_DERIVATION_BY_OXIDATION_OF_ORGANIC_COMPOUNDS	314	-0.477918	-1.92017	0	0.0169673	0.7785	3608	tags=38%, list=19%, signal=46%
GOBP_ENERGY_HOMEOSTASIS	76	-0.407535	-1.37198	0.0455531	0.397808	1	1433	tags=16%, list=7%, signal=17%
GOBP_ENERGY_RESERVE_METABOLIC_PROCESS	81	-0.385327	-1.29795	0.0847458	0.456811	1	1506	tags=15%, list=8%, signal=16%
GOBP_ENGULFMENT_OF_APOPTOTIC_CELL	13	-0.324717	-0.741719	0.799154	0.958231	1	442	tags=15%, list=2%, signal=16%
GOBP_ENSHEATHMENT_OF_NEURONS	166	-0.625315	-2.35338	0	0	0	1497	tags=25%, list=8%, signal=27%	glial differentiation
GOBP_ENTERIC_NERVOUS_SYSTEM_DEVELOPMENT	11	-0.725597	-1.58529	0.020585	0.238662	1	1178	tags=27%, list=6%, signal=29%
GOBP_ENTRY_INTO_HOST	79	-0.405262	-1.36827	0.057047	0.400196	1	4959	tags=42%, list=26%, signal=56%
GOBP_EOSINOPHIL_ACTIVATION	5	-0.494848	-0.91843	0.567481	0.831041	1	2785	tags=40%, list=14%, signal=47%
GOBP_EOSINOPHIL_DIFFERENTIATION	4	-0.811375	-1.42311	0.0876656	0.365351	1	256	tags=25%, list=1%, signal=25%
GOBP_EOSINOPHIL_MEDIATED_IMMUNITY	5	-0.511196	-0.933487	0.566802	0.817123	1	591	tags=20%, list=3%, signal=21%
GOBP_EPIBOLY	33	-0.315751	-0.906223	0.589888	0.840103	1	1394	tags=15%, list=7%, signal=16%
GOBP_EPIDERMAL_CELL_FATE_SPECIFICATION	4	-0.536269	-0.924526	0.588235	0.825193	1	8595	tags=75%, list=44%, signal=135%
GOBP_EPIDERMAL_GROWTH_FACTOR_RECEPTOR_SIGNALING_PATHWAY	93	-0.287175	-0.996794	0.447761	0.744012	1	2345	tags=19%, list=12%, signal=22%
GOBP_EPIDERMIS_DEVELOPMENT	280	-0.307625	-1.22868	0.0575693	0.521981	1	2878	tags=22%, list=15%, signal=25%
GOBP_EPIDERMIS_MORPHOGENESIS	33	-0.494612	-1.42084	0.0636743	0.368535	1	1113	tags=18%, list=6%, signal=19%
GOBP_EPITHELIAL_CELL_DEVELOPMENT	201	-0.330682	-1.27471	0.0429185	0.477577	1	1418	tags=14%, list=7%, signal=15%
GOBP_EPITHELIAL_CELL_DIFFERENTIATION_INVOLVED_IN_KIDNEY_DEVELOPMENT	33	-0.421577	-1.20779	0.204126	0.535654	1	1241	tags=15%, list=6%, signal=16%
GOBP_EPITHELIAL_CELL_DIFFERENTIATION_INVOLVED_IN_PROSTATE_GLAND_DEVELOPMENT	12	-0.612396	-1.3846	0.116081	0.39099	1	909	tags=17%, list=5%, signal=17%
GOBP_EPITHELIAL_CELL_FATE_COMMITMENT	14	-0.73811	-1.72496	0.00893855	0.113631	1	3397	tags=57%, list=18%, signal=69%
GOBP_EPITHELIAL_CELL_MORPHOGENESIS	39	-0.424137	-1.23351	0.173056	0.516173	1	2133	tags=23%, list=11%, signal=26%
GOBP_EPITHELIAL_CELL_PROLIFERATION	423	-0.284272	-1.17711	0.0581395	0.562523	1	2938	tags=21%, list=15%, signal=25%
GOBP_EPITHELIAL_CELL_PROLIFERATION_INVOLVED_IN_PROSTATE_GLAND_DEVELOPMENT	12	-0.6349	-1.45348	0.0939457	0.348291	1	2515	tags=42%, list=13%, signal=48%
GOBP_EPITHELIAL_CELL_PROLIFERATION_INVOLVED_IN_SALIVARY_GLAND_MORPHOGENESIS	5	-0.73819	-1.33872	0.156504	0.425052	1	1990	tags=40%, list=10%, signal=45%
GOBP_EPITHELIAL_FLUID_TRANSPORT	7	-0.682121	-1.36784	0.142857	0.399832	1	1183	tags=29%, list=6%, signal=30%
GOBP_EPITHELIAL_MESENCHYMAL_CELL_SIGNALING	5	-0.793633	-1.45582	0.0849539	0.348299	1	3555	tags=80%, list=18%, signal=98%
GOBP_EPITHELIAL_TO_MESENCHYMAL_TRANSITION_INVOLVED_IN_ENDOCARDIAL_CUSHION_FORMATION	17	-0.607641	-1.52012	0.055914	0.291116	1	3217	tags=41%, list=17%, signal=49%
GOBP_EPITHELIAL_TUBE_BRANCHING_INVOLVED_IN_LUNG_MORPHOGENESIS	34	-0.462321	-1.3245	0.102285	0.437437	1	2524	tags=35%, list=13%, signal=41%
GOBP_EPITHELIAL_TUBE_MORPHOGENESIS	349	-0.274396	-1.11344	0.154961	0.622566	1	2174	tags=18%, list=11%, signal=20%
GOBP_EPOXYGENASE_P450_PATHWAY	6	-0.866853	-1.64758	0.00208986	0.175564	1	182	tags=33%, list=1%, signal=34%
GOBP_ER_ASSOCIATED_MISFOLDED_PROTEIN_CATABOLIC_PROCESS	12	-0.432704	-0.976834	0.47921	0.76524	1	2451	tags=25%, list=13%, signal=29%
GOBP_ER_NUCLEUS_SIGNALING_PATHWAY	41	-0.437841	-1.3203	0.1125	0.440677	1	1559	tags=20%, list=8%, signal=21%
GOBP_ER_OVERLOAD_RESPONSE	12	-0.41283	-0.930067	0.552207	0.819384	1	5510	tags=50%, list=28%, signal=70%
GOBP_ERBB2_EGFR_SIGNALING_PATHWAY	6	-0.536957	-1.01934	0.471536	0.719216	1	6028	tags=67%, list=31%, signal=97%
GOBP_ERBB2_ERBB4_SIGNALING_PATHWAY	4	-0.57439	-0.999917	0.501025	0.741173	1	7172	tags=75%, list=37%, signal=119%
GOBP_ERK1_AND_ERK2_CASCADE	304	-0.278207	-1.12176	0.181818	0.614315	1	2243	tags=19%, list=12%, signal=21%
GOBP_ERYTHROCYTE_DEVELOPMENT	39	-0.370581	-1.10243	0.316201	0.634581	1	6704	tags=59%, list=35%, signal=90%
GOBP_ERYTHROCYTE_HOMEOSTASIS	142	-0.247845	-0.904723	0.684916	0.841862	1	1955	tags=13%, list=10%, signal=15%
GOBP_ERYTHROCYTE_MATURATION	14	-0.298382	-0.705771	0.841595	0.972245	1	6704	tags=57%, list=35%, signal=87%
GOBP_ERYTHROSE_4_PHOSPHATE_PHOSPHOENOLPYRUVATE_FAMILY_AMINO_ACID_CATABOLIC_PROCESS	4	-0.969237	-1.68868	0.00106838	0.14387	1	95	tags=50%, list=0%, signal=50%
GOBP_ESTABLISHMENT_OF_BLOOD_BRAIN_BARRIER	16	-0.289035	-0.718276	0.853278	0.965534	1	1076	tags=13%, list=6%, signal=13%
GOBP_ESTABLISHMENT_OF_BLOOD_NERVE_BARRIER	4	-0.839847	-1.47302	0.0597938	0.333574	1	515	tags=50%, list=3%, signal=51%
GOBP_ESTABLISHMENT_OF_BLOOD_RETINAL_BARRIER	6	-0.808083	-1.53843	0.033954	0.272827	1	185	tags=17%, list=1%, signal=17%
GOBP_ESTABLISHMENT_OF_CELL_POLARITY	155	-0.254045	-0.949089	0.593819	0.799767	1	2616	tags=20%, list=13%, signal=23%
GOBP_ESTABLISHMENT_OF_ENDOTHELIAL_BARRIER	46	-0.39523	-1.20235	0.183908	0.541113	1	450	tags=15%, list=2%, signal=16%
GOBP_ESTABLISHMENT_OF_EPITHELIAL_CELL_APICAL_BASAL_POLARITY	18	-0.362914	-0.899621	0.607183	0.845999	1	4158	tags=44%, list=21%, signal=57%
GOBP_ESTABLISHMENT_OF_EPITHELIAL_CELL_POLARITY	39	-0.392622	-1.16483	0.241307	0.57471	1	4158	tags=38%, list=21%, signal=49%
GOBP_ESTABLISHMENT_OF_LYMPHOCYTE_POLARITY	11	-0.467625	-1.04198	0.423491	0.696964	1	1585	tags=27%, list=8%, signal=30%
GOBP_ESTABLISHMENT_OF_MEIOTIC_SPINDLE_LOCALIZATION	5	-0.508324	-0.919388	0.594737	0.831189	1	1585	tags=40%, list=8%, signal=44%
GOBP_ESTABLISHMENT_OF_PLANAR_POLARITY_INVOLVED_IN_NEURAL_TUBE_CLOSURE	16	-0.306019	-0.729469	0.823529	0.961238	1	345	tags=6%, list=2%, signal=6%
GOBP_ESTABLISHMENT_OF_PLANAR_POLARITY_OF_EMBRYONIC_EPITHELIUM	18	-0.312018	-0.777438	0.76226	0.941902	1	2409	tags=17%, list=12%, signal=19%
GOBP_ESTABLISHMENT_OF_PROTEIN_LOCALIZATION_TO_CHROMATIN	6	-0.308609	-0.595983	0.906725	0.987944	1	5426	tags=50%, list=28%, signal=69%
GOBP_ESTABLISHMENT_OF_PROTEIN_LOCALIZATION_TO_CHROMOSOME	26	-0.343645	-0.92875	0.553073	0.820306	1	353	tags=8%, list=2%, signal=8%
GOBP_ESTABLISHMENT_OF_PROTEIN_LOCALIZATION_TO_MITOCHONDRIAL_MEMBRANE	29	-0.240526	-0.665209	0.925054	0.978801	1	3939	tags=24%, list=20%, signal=30%
GOBP_ESTABLISHMENT_OF_PROTEIN_LOCALIZATION_TO_TELOMERE	19	-0.260618	-0.653226	0.911435	0.98089	1	2099	tags=11%, list=11%, signal=12%
GOBP_ESTABLISHMENT_OF_SERTOLI_CELL_BARRIER	8	-0.364597	-0.741896	0.764644	0.958188	1	2225	tags=25%, list=11%, signal=28%
GOBP_ESTABLISHMENT_OF_SKIN_BARRIER	29	-0.514343	-1.42128	0.0756396	0.368409	1	2822	tags=34%, list=15%, signal=40%
GOBP_ESTABLISHMENT_OF_SPINDLE_ORIENTATION	41	-0.257214	-0.767867	0.848548	0.944784	1	1939	tags=17%, list=10%, signal=19%
GOBP_ESTABLISHMENT_OR_MAINTENANCE_OF_MONOPOLAR_CELL_POLARITY	25	-0.323278	-0.880255	0.622056	0.863736	1	4158	tags=40%, list=21%, signal=51%
GOBP_ESTABLISHMENT_OR_MAINTENANCE_OF_TRANSMEMBRANE_ELECTROCHEMICAL_GRADIENT	5	-0.470711	-0.868727	0.604384	0.873883	1	5253	tags=80%, list=27%, signal=110%
GOBP_ESTROGEN_BIOSYNTHETIC_PROCESS	5	-0.312915	-0.577662	0.903226	0.989206	1	1732	tags=20%, list=9%, signal=22%
GOBP_ESTROUS_CYCLE	9	-0.524732	-1.10667	0.346875	0.629704	1	28	tags=11%, list=0%, signal=11%
GOBP_ETHANOL_CATABOLIC_PROCESS	2	-0.868108	-1.30929	0.141129	0.447123	1	2560	tags=100%, list=13%, signal=115%
GOBP_ETHANOL_METABOLIC_PROCESS	2	-0.868108	-1.26962	0.150769	0.482933	1	2560	tags=100%, list=13%, signal=115%
GOBP_ETHANOL_OXIDATION	2	-0.868108	-1.29372	0.131063	0.459239	1	2560	tags=100%, list=13%, signal=115%
GOBP_ETHANOLAMINE_CONTAINING_COMPOUND_METABOLIC_PROCESS	9	-0.486774	-1.03557	0.420335	0.704406	1	3238	tags=33%, list=17%, signal=40%
GOBP_ETHER_BIOSYNTHETIC_PROCESS	11	-0.407219	-0.916173	0.575431	0.832801	1	2601	tags=36%, list=13%, signal=42%
GOBP_ETHER_METABOLIC_PROCESS	22	-0.556953	-1.47671	0.0582307	0.33051	1	2601	tags=41%, list=13%, signal=47%
GOBP_EXCRETION	26	-0.301556	-0.806885	0.754595	0.921646	1	561	tags=8%, list=3%, signal=8%
GOBP_EXECUTION_PHASE_OF_APOPTOSIS	65	-0.201656	-0.661862	0.980687	0.979549	1	1006	tags=6%, list=5%, signal=6%
GOBP_EXIT_FROM_MITOSIS	29	-0.562024	-1.54104	0.0296053	0.273648	1	3790	tags=45%, list=20%, signal=56%
GOBP_EXOCRINE_PANCREAS_DEVELOPMENT	7	-0.492535	-0.98555	0.48657	0.755807	1	1727	tags=29%, list=9%, signal=31%
GOBP_EXOCRINE_SYSTEM_DEVELOPMENT	46	-0.479196	-1.47023	0.027115	0.336203	1	2114	tags=24%, list=11%, signal=27%
GOBP_EXOCYST_LOCALIZATION	8	-0.359683	-0.729793	0.792812	0.961219	1	3677	tags=50%, list=19%, signal=62%
GOBP_EXOCYTIC_INSERTION_OF_NEUROTRANSMITTER_RECEPTOR_TO_POSTSYNAPTIC_MEMBRANE	9	-0.670838	-1.42232	0.0933476	0.36658	1	591	tags=22%, list=3%, signal=23%
GOBP_EXPORT_ACROSS_PLASMA_MEMBRANE	55	-0.328832	-1.04358	0.361229	0.695327	1	1428	tags=15%, list=7%, signal=16%
GOBP_EXTRACELLULAR_EXOSOME_ASSEMBLY	7	-0.40582	-0.806169	0.716942	0.921264	1	2648	tags=29%, list=14%, signal=33%
GOBP_EXTRACELLULAR_MATRIX_ASSEMBLY	45	-0.489928	-1.49166	0.031348	0.317244	1	1670	tags=22%, list=9%, signal=24%
GOBP_EXTRACELLULAR_MATRIX_CELL_SIGNALING	5	-0.359146	-0.648601	0.870798	0.981722	1	4343	tags=40%, list=22%, signal=52%
GOBP_EXTRACELLULAR_MATRIX_CONSTITUENT_SECRETION	15	-0.48635	-1.16055	0.292017	0.578077	1	4385	tags=47%, list=23%, signal=60%
GOBP_EXTRACELLULAR_MATRIX_DISASSEMBLY	28	-0.454199	-1.23612	0.180208	0.513683	1	4717	tags=46%, list=24%, signal=61%
GOBP_EXTRACELLULAR_STRUCTURE_ORGANIZATION	284	-0.379495	-1.51459	0.00109529	0.296013	1	2892	tags=23%, list=15%, signal=27%
GOBP_EXTRATHYMIC_T_CELL_DIFFERENTIATION	2	-0.697117	-1.03363	0.474872	0.70521	1	5875	tags=100%, list=30%, signal=143%
GOBP_EXTRINSIC_APOPTOTIC_SIGNALING_PATHWAY	212	-0.246058	-0.952668	0.585011	0.796979	1	2942	tags=18%, list=15%, signal=21%
GOBP_FARNESOL_METABOLIC_PROCESS	2	-0.788724	-1.17287	0.310995	0.56819	1	4099	tags=100%, list=21%, signal=127%
GOBP_FAS_SIGNALING_PATHWAY	6	-0.69993	-1.34013	0.164938	0.424072	1	109	tags=17%, list=1%, signal=17%
GOBP_FAT_PAD_DEVELOPMENT	8	-0.509284	-1.0495	0.411943	0.690278	1	732	tags=25%, list=4%, signal=26%
GOBP_FAT_SOLUBLE_VITAMIN_BIOSYNTHETIC_PROCESS	9	-0.703341	-1.49283	0.0588235	0.31597	1	3148	tags=67%, list=16%, signal=80%
GOBP_FAT_SOLUBLE_VITAMIN_METABOLIC_PROCESS	28	-0.40999	-1.14439	0.275899	0.59153	1	4413	tags=43%, list=23%, signal=55%
GOBP_FATTY_ACID_ALPHA_OXIDATION	5	-0.879429	-1.59041	0.0177824	0.233782	1	1786	tags=80%, list=9%, signal=88%
GOBP_FATTY_ACID_BETA_OXIDATION	68	-0.49293	-1.6038	0.00729167	0.221845	1	3293	tags=38%, list=17%, signal=46%
GOBP_FATTY_ACID_BETA_OXIDATION_USING_ACYL_COA_DEHYDROGENASE	13	-0.572068	-1.32028	0.154737	0.440494	1	6613	tags=77%, list=34%, signal=117%
GOBP_FATTY_ACID_BIOSYNTHETIC_PROCESS	131	-0.547781	-1.99038	0	0.00690343	0.3345	3064	tags=38%, list=16%, signal=45%
GOBP_FATTY_ACID_CATABOLIC_PROCESS	94	-0.545183	-1.87668	0	0.0294975	0.9565	3293	tags=44%, list=17%, signal=52%
GOBP_FATTY_ACID_DERIVATIVE_CATABOLIC_PROCESS	13	-0.541773	-1.26554	0.176535	0.486584	1	3052	tags=54%, list=16%, signal=64%
GOBP_FATTY_ACID_ELONGATION	13	-0.722629	-1.68818	0.0136268	0.144174	1	1062	tags=38%, list=5%, signal=41%
GOBP_FATTY_ACID_ELONGATION_SATURATED_FATTY_ACID	6	-0.897947	-1.68595	0.00201816	0.145516	1	1062	tags=67%, list=5%, signal=71%
GOBP_FATTY_ACID_HOMEOSTASIS	13	-0.383414	-0.895306	0.6149	0.8495	1	2414	tags=31%, list=12%, signal=35%
GOBP_FATTY_ACID_METABOLIC_PROCESS	335	-0.472353	-1.91344	0	0.0186776	0.8205	3064	tags=33%, list=16%, signal=39%
GOBP_FATTY_ACID_OMEGA_OXIDATION	3	-0.740277	-1.19107	0.289144	0.549816	1	5039	tags=100%, list=26%, signal=135%
GOBP_FATTY_ACID_TRANSPORT	87	-0.274077	-0.935362	0.58204	0.815224	1	3684	tags=33%, list=19%, signal=41%
GOBP_FATTY_ACYL_COA_CATABOLIC_PROCESS	5	-0.549189	-1.02116	0.456995	0.71834	1	3052	tags=60%, list=16%, signal=71%
GOBP_FC_RECEPTOR_MEDIATED_STIMULATORY_SIGNALING_PATHWAY	16	-0.387441	-0.935347	0.524211	0.814892	1	891	tags=19%, list=5%, signal=20%
GOBP_FEMALE_MEIOSIS_CHROMOSOME_SEGREGATION	7	-0.277371	-0.549207	0.940803	0.992813	1	14014	tags=100%, list=72%, signal=361%
GOBP_FEMALE_MEIOSIS_I	11	-0.335395	-0.74149	0.79329	0.957997	1	1703	tags=18%, list=9%, signal=20%
GOBP_FEMALE_PREGNANCY	113	-0.254434	-0.891898	0.694792	0.852376	1	1455	tags=12%, list=8%, signal=12%
GOBP_FERROPTOSIS	5	-0.547852	-1.00827	0.479055	0.733271	1	1348	tags=40%, list=7%, signal=43%
GOBP_FERTILIZATION	138	-0.286091	-1.04369	0.345372	0.695613	1	2547	tags=17%, list=13%, signal=20%
GOBP_FIBRINOLYSIS	13	-0.360798	-0.829463	0.662002	0.905613	1	3013	tags=31%, list=16%, signal=36%
GOBP_FIBROBLAST_ACTIVATION	20	-0.419397	-1.09359	0.344978	0.643907	1	5016	tags=50%, list=26%, signal=67%
GOBP_FIBROBLAST_GROWTH_FACTOR_RECEPTOR_SIGNALING_PATHWAY	74	-0.267224	-0.895319	0.642553	0.849649	1	2320	tags=15%, list=12%, signal=17%
GOBP_FIBROBLAST_MIGRATION	70	-0.437904	-1.44264	0.0262582	0.354218	1	1938	tags=20%, list=10%, signal=22%
GOBP_FIBROBLAST_PROLIFERATION	141	-0.279932	-1.03436	0.355482	0.704915	1	3460	tags=25%, list=18%, signal=30%
GOBP_FLUID_TRANSPORT	21	-0.508373	-1.31234	0.15229	0.444705	1	2885	tags=38%, list=15%, signal=45%
GOBP_FOAM_CELL_DIFFERENTIATION	27	-0.375366	-1.00958	0.424612	0.731933	1	4083	tags=33%, list=21%, signal=42%
GOBP_FOCAL_ADHESION_ASSEMBLY	86	-0.350299	-1.18329	0.166117	0.556381	1	2037	tags=19%, list=11%, signal=21%
GOBP_FOLIC_ACID_CONTAINING_COMPOUND_BIOSYNTHETIC_PROCESS	7	-0.515349	-1.01086	0.465553	0.731449	1	895	tags=14%, list=5%, signal=15%
GOBP_FOLIC_ACID_CONTAINING_COMPOUND_METABOLIC_PROCESS	24	-0.504954	-1.34869	0.125541	0.41856	1	3500	tags=29%, list=18%, signal=36%
GOBP_FOLIC_ACID_METABOLIC_PROCESS	10	-0.688471	-1.49836	0.0662055	0.312685	1	938	tags=30%, list=5%, signal=32%
GOBP_FOLIC_ACID_TRANSPORT	8	-0.248336	-0.507952	0.966986	0.996044	1	14577	tags=100%, list=75%, signal=403%
GOBP_FOREBRAIN_DORSAL_VENTRAL_PATTERN_FORMATION	6	-0.303101	-0.588459	0.90272	0.988347	1	13515	tags=100%, list=70%, signal=330%
GOBP_FOREBRAIN_GENERATION_OF_NEURONS	62	-0.322882	-1.0337	0.404435	0.70542	1	716	tags=13%, list=4%, signal=13%
GOBP_FOREBRAIN_NEUROBLAST_DIVISION	6	-0.863683	-1.64944	0.0194175	0.174897	1	435	tags=33%, list=2%, signal=34%
GOBP_FOREBRAIN_NEURON_FATE_COMMITMENT	8	-0.419237	-0.85303	0.629823	0.886919	1	256	tags=13%, list=1%, signal=13%
GOBP_FOREBRAIN_RADIAL_GLIAL_CELL_DIFFERENTIATION	9	-0.761854	-1.61596	0.0236052	0.209946	1	567	tags=33%, list=3%, signal=34%
GOBP_FOREBRAIN_REGIONALIZATION	25	-0.380621	-1.01904	0.432258	0.719742	1	4685	tags=36%, list=24%, signal=47%
GOBP_FOREBRAIN_VENTRICULAR_ZONE_PROGENITOR_CELL_DIVISION	6	-0.802105	-1.53981	0.0344456	0.274063	1	57	tags=17%, list=0%, signal=17%
GOBP_FORMALDEHYDE_METABOLIC_PROCESS	4	-0.392938	-0.681864	0.817805	0.976085	1	2560	tags=25%, list=13%, signal=29%
GOBP_FORMATION_OF_ANATOMICAL_BOUNDARY	5	-0.543882	-0.990725	0.495197	0.750411	1	1990	tags=40%, list=10%, signal=45%
GOBP_FORMATION_OF_EXTRACHROMOSOMAL_CIRCULAR_DNA	8	-0.499356	-1.0298	0.449588	0.709612	1	3829	tags=38%, list=20%, signal=47%
GOBP_FORMATION_OF_RADIAL_GLIAL_SCAFFOLDS	5	-0.439246	-0.798666	0.695745	0.927077	1	435	tags=20%, list=2%, signal=20%
GOBP_FREE_UBIQUITIN_CHAIN_POLYMERIZATION	9	-0.234282	-0.488331	0.969182	0.998266	1	4016	tags=33%, list=21%, signal=42%
GOBP_FRUCTOSE_2_6_BISPHOSPHATE_METABOLIC_PROCESS	6	-0.538598	-1.02624	0.463059	0.713067	1	5923	tags=50%, list=31%, signal=72%
GOBP_FRUCTOSE_6_PHOSPHATE_METABOLIC_PROCESS	12	-0.406328	-0.916899	0.567914	0.831858	1	1195	tags=17%, list=6%, signal=18%
GOBP_FRUCTOSE_CATABOLIC_PROCESS	6	-0.649587	-1.23623	0.259298	0.513877	1	924	tags=33%, list=5%, signal=35%
GOBP_FRUCTOSE_METABOLIC_PROCESS	12	-0.523326	-1.19605	0.250771	0.544094	1	2277	tags=25%, list=12%, signal=28%
GOBP_FUCOSE_METABOLIC_PROCESS	7	-0.44468	-0.88681	0.596891	0.857088	1	2200	tags=29%, list=11%, signal=32%
GOBP_FUCOSYLATION	11	-0.355907	-0.798647	0.701646	0.926933	1	2200	tags=18%, list=11%, signal=20%
GOBP_FUSED_ANTRUM_STAGE	5	-0.779783	-1.45119	0.077577	0.350943	1	187	tags=20%, list=1%, signal=20%
GOBP_G_PROTEIN_COUPLED_PURINERGIC_RECEPTOR_SIGNALING_PATHWAY	12	-0.40704	-0.936477	0.536765	0.813865	1	2410	tags=33%, list=12%, signal=38%
GOBP_G_PROTEIN_COUPLED_RECEPTOR_SIGNALING_PATHWAY_COUPLED_TO_CGMP_NUCLEOTIDE_SECOND_MESSENGER	4	-0.302553	-0.519672	0.95558	0.995521	1	13525	tags=100%, list=70%, signal=331%
GOBP_G_PROTEIN_COUPLED_RECEPTOR_SIGNALING_PATHWAY_INVOLVED_IN_HEART_PROCESS	16	-0.364829	-0.890816	0.604804	0.853325	1	647	tags=19%, list=3%, signal=19%
GOBP_G1_TO_G0_TRANSITION	17	-0.357509	-0.888631	0.606996	0.854906	1	2603	tags=29%, list=13%, signal=34%
GOBP_G2_MI_TRANSITION_OF_MEIOTIC_CELL_CYCLE	6	-0.608223	-1.15505	0.316842	0.582932	1	2263	tags=33%, list=12%, signal=38%
GOBP_GABAERGIC_NEURON_DIFFERENTIATION	21	-0.32664	-0.845249	0.685466	0.891317	1	1283	tags=14%, list=7%, signal=15%
GOBP_GALACTOLIPID_METABOLIC_PROCESS	8	-0.716199	-1.47894	0.0778128	0.328478	1	123	tags=38%, list=1%, signal=38%
GOBP_GALACTOSE_CATABOLIC_PROCESS	5	-0.74144	-1.35721	0.149114	0.407289	1	2294	tags=60%, list=12%, signal=68%
GOBP_GALACTOSE_METABOLIC_PROCESS	8	-0.608526	-1.24002	0.229056	0.509283	1	2294	tags=38%, list=12%, signal=43%
GOBP_GAMMA_AMINOBUTYRIC_ACID_BIOSYNTHETIC_PROCESS	6	-0.714686	-1.35818	0.133751	0.407908	1	122	tags=17%, list=1%, signal=17%
GOBP_GAMMA_AMINOBUTYRIC_ACID_METABOLIC_PROCESS	8	-0.742585	-1.53519	0.0548523	0.277812	1	241	tags=25%, list=1%, signal=25%
GOBP_GANGLIOSIDE_CATABOLIC_PROCESS	7	-0.741036	-1.47241	0.0743889	0.333609	1	2687	tags=57%, list=14%, signal=66%
GOBP_GANGLIOSIDE_METABOLIC_PROCESS	27	-0.325928	-0.901308	0.585366	0.845795	1	2687	tags=30%, list=14%, signal=34%
GOBP_GAP_JUNCTION_ASSEMBLY	15	-0.559934	-1.33024	0.148594	0.434754	1	1992	tags=33%, list=10%, signal=37%
GOBP_GAP_JUNCTION_MEDIATED_INTERCELLULAR_TRANSPORT	3	-0.868937	-1.39693	0.06639	0.38306	1	224	tags=33%, list=1%, signal=34%
GOBP_GAS_TRANSPORT	12	-0.814119	-1.82951	0.00212993	0.0499916	0.998	1183	tags=50%, list=6%, signal=53%
GOBP_GASTRIC_MOTILITY	5	-0.501528	-0.913698	0.588865	0.833677	1	5778	tags=60%, list=30%, signal=85%
GOBP_GASTRULATION	154	-0.287645	-1.07606	0.272727	0.662881	1	2869	tags=19%, list=15%, signal=23%
GOBP_GDP_MANNOSE_METABOLIC_PROCESS	8	-0.637002	-1.29251	0.209968	0.459704	1	4779	tags=63%, list=25%, signal=83%
GOBP_GENERATION_OF_PRECURSOR_METABOLITES_AND_ENERGY	430	-0.42918	-1.78337	0	0.0749104	1	3573	tags=34%, list=18%, signal=41%
GOBP_GENITALIA_DEVELOPMENT	45	-0.228592	-0.687614	0.937566	0.974567	1	3129	tags=22%, list=16%, signal=26%
GOBP_GENITALIA_MORPHOGENESIS	17	-0.348291	-0.871101	0.632026	0.872491	1	3129	tags=24%, list=16%, signal=28%
GOBP_GENOMIC_IMPRINTING	14	-0.313122	-0.75484	0.777896	0.952212	1	1130	tags=14%, list=6%, signal=15%
GOBP_GERM_CELL_PROLIFERATION	13	-0.323219	-0.744585	0.797718	0.956807	1	7258	tags=62%, list=37%, signal=98%
GOBP_GERM_LINE_STEM_CELL_POPULATION_MAINTENANCE	5	-0.339487	-0.617978	0.892451	0.984545	1	2510	tags=40%, list=13%, signal=46%
GOBP_GLAND_DEVELOPMENT	379	-0.295001	-1.20756	0.0445434	0.535095	1	1990	tags=15%, list=10%, signal=17%
GOBP_GLAND_MORPHOGENESIS	132	-0.378164	-1.3817	0.016	0.39224	1	2114	tags=22%, list=11%, signal=24%
GOBP_GLANDULAR_EPITHELIAL_CELL_DIFFERENTIATION	61	-0.340849	-1.09617	0.289779	0.642376	1	961	tags=13%, list=5%, signal=14%
GOBP_GLIAL_CELL_ACTIVATION	47	-0.334504	-1.02586	0.405105	0.713076	1	1333	tags=13%, list=7%, signal=14%
GOBP_GLIAL_CELL_APOPTOTIC_PROCESS	20	-0.529053	-1.34405	0.116685	0.420161	1	2000	tags=25%, list=10%, signal=28%
GOBP_GLIAL_CELL_DEVELOPMENT	133	-0.598645	-2.17805	0	0.000307913	0.0075	1553	tags=23%, list=8%, signal=25%	glial differentiation
GOBP_GLIAL_CELL_DIFFERENTIATION	276	-0.515566	-2.04718	0	0.00286808	0.119	1615	tags=20%, list=8%, signal=21%	glial differentiation
GOBP_GLIAL_CELL_FATE_COMMITMENT	17	-0.591311	-1.4923	0.0668081	0.316478	1	1304	tags=29%, list=7%, signal=32%
GOBP_GLIAL_CELL_FATE_SPECIFICATION	9	-0.841179	-1.75193	0.00443459	0.0961981	1	1304	tags=56%, list=7%, signal=60%
GOBP_GLIAL_CELL_MIGRATION	69	-0.399836	-1.29741	0.08742	0.45639	1	1350	tags=13%, list=7%, signal=14%
GOBP_GLIAL_CELL_PROLIFERATION	74	-0.595484	-1.98332	0	0.00777253	0.379	1470	tags=22%, list=8%, signal=23%	glial differentiation
GOBP_GLIOGENESIS	373	-0.47547	-1.94597	0	0.0123005	0.6185	1553	tags=18%, list=8%, signal=19%	glial differentiation
GOBP_GLOMERULAR_EPITHELIAL_CELL_DEVELOPMENT	6	-0.353549	-0.684564	0.821466	0.975274	1	5729	tags=67%, list=30%, signal=95%
GOBP_GLOMERULAR_EPITHELIUM_DEVELOPMENT	16	-0.497649	-1.23131	0.197838	0.518466	1	219	tags=13%, list=1%, signal=13%
GOBP_GLOMERULAR_MESANGIAL_CELL_PROLIFERATION	10	-0.353127	-0.764988	0.739741	0.945968	1	4083	tags=50%, list=21%, signal=63%
GOBP_GLOMERULAR_MESANGIUM_DEVELOPMENT	12	-0.352988	-0.805785	0.694444	0.921366	1	4385	tags=50%, list=23%, signal=65%
GOBP_GLOMERULUS_DEVELOPMENT	60	-0.310983	-0.989521	0.470716	0.751302	1	2399	tags=18%, list=12%, signal=21%
GOBP_GLUCAN_BIOSYNTHETIC_PROCESS	43	-0.259269	-0.776127	0.822511	0.941708	1	3251	tags=19%, list=17%, signal=22%
GOBP_GLUCOCORTICOID_BIOSYNTHETIC_PROCESS	13	-0.403895	-0.948509	0.530381	0.80005	1	4760	tags=38%, list=25%, signal=51%
GOBP_GLUCOCORTICOID_METABOLIC_PROCESS	20	-0.29102	-0.744611	0.811024	0.956946	1	160	tags=5%, list=1%, signal=5%
GOBP_GLUCOSAMINE_CONTAINING_COMPOUND_CATABOLIC_PROCESS	8	-0.506636	-1.04699	0.410678	0.692398	1	4659	tags=38%, list=24%, signal=49%
GOBP_GLUCOSAMINE_CONTAINING_COMPOUND_METABOLIC_PROCESS	23	-0.21895	-0.583503	0.970041	0.988531	1	4659	tags=30%, list=24%, signal=40%
GOBP_GLUCOSE_6_PHOSPHATE_METABOLIC_PROCESS	27	-0.491892	-1.33806	0.103939	0.42532	1	2330	tags=30%, list=12%, signal=34%
GOBP_GLUCOSE_IMPORT_IN_RESPONSE_TO_INSULIN_STIMULUS	6	-0.718017	-1.38303	0.126437	0.392166	1	3298	tags=67%, list=17%, signal=80%
GOBP_GLUCOSE_METABOLIC_PROCESS	183	-0.262615	-0.994583	0.457923	0.746785	1	2414	tags=15%, list=12%, signal=17%
GOBP_GLUCOSYLCERAMIDE_METABOLIC_PROCESS	6	-0.671358	-1.29364	0.197095	0.459199	1	1421	tags=33%, list=7%, signal=36%
GOBP_GLUCURONATE_CATABOLIC_PROCESS_TO_XYLULOSE_5_PHOSPHATE	5	-0.676069	-1.25319	0.226203	0.497206	1	3173	tags=60%, list=16%, signal=72%
GOBP_GLUTAMATE_CATABOLIC_PROCESS	6	-0.547896	-1.05312	0.435602	0.687363	1	5222	tags=83%, list=27%, signal=114%
GOBP_GLUTAMATE_METABOLIC_PROCESS	25	-0.292581	-0.7925	0.757415	0.931651	1	4797	tags=40%, list=25%, signal=53%
GOBP_GLUTAMATE_SECRETION_NEUROTRANSMISSION	8	-0.314634	-0.658873	0.875	0.980499	1	3229	tags=38%, list=17%, signal=45%
GOBP_GLUTAMATERGIC_NEURON_DIFFERENTIATION	23	-0.463424	-1.21345	0.218029	0.531694	1	4378	tags=39%, list=23%, signal=50%
GOBP_GLUTAMINE_FAMILY_AMINO_ACID_BIOSYNTHETIC_PROCESS	12	-0.361017	-0.826313	0.685836	0.908098	1	485	tags=8%, list=3%, signal=9%
GOBP_GLUTAMINE_FAMILY_AMINO_ACID_CATABOLIC_PROCESS	20	-0.354449	-0.893607	0.597266	0.850748	1	2875	tags=30%, list=15%, signal=35%
GOBP_GLUTAMINE_FAMILY_AMINO_ACID_METABOLIC_PROCESS	60	-0.342725	-1.10521	0.28967	0.631608	1	2915	tags=22%, list=15%, signal=25%
GOBP_GLUTAMINE_METABOLIC_PROCESS	21	-0.393641	-1.02258	0.421909	0.717135	1	880	tags=14%, list=5%, signal=15%
GOBP_GLUTAMINE_TRANSPORT	8	-0.557231	-1.14442	0.322222	0.591865	1	3229	tags=25%, list=17%, signal=30%
GOBP_GLUTATHIONE_CATABOLIC_PROCESS	5	-0.288379	-0.532598	0.946612	0.994267	1	6661	tags=60%, list=34%, signal=91%
GOBP_GLUTATHIONE_METABOLIC_PROCESS	55	-0.54918	-1.73062	0.00331858	0.11317	1	2878	tags=36%, list=15%, signal=43%
GOBP_GLUTATHIONE_TRANSMEMBRANE_TRANSPORT	5	-0.547017	-1.00582	0.476483	0.736308	1	2721	tags=40%, list=14%, signal=47%
GOBP_GLUTATHIONE_TRANSPORT	7	-0.449557	-0.898353	0.578556	0.846325	1	4154	tags=43%, list=21%, signal=55%
GOBP_GLYCERALDEHYDE_3_PHOSPHATE_BIOSYNTHETIC_PROCESS	11	-0.513208	-1.15102	0.295218	0.588189	1	3165	tags=36%, list=16%, signal=43%
GOBP_GLYCERALDEHYDE_3_PHOSPHATE_METABOLIC_PROCESS	15	-0.623653	-1.52398	0.0507937	0.287781	1	3165	tags=40%, list=16%, signal=48%
GOBP_GLYCEROL_BIOSYNTHETIC_PROCESS	3	-0.656409	-1.0626	0.434211	0.674749	1	3611	tags=67%, list=19%, signal=82%
GOBP_GLYCEROL_ETHER_METABOLIC_PROCESS	18	-0.591905	-1.49671	0.0562162	0.314363	1	2601	tags=50%, list=13%, signal=58%
GOBP_GLYCEROL_TRANSMEMBRANE_TRANSPORT	2	-0.90246	-1.34161	0.0854271	0.422704	1	1894	tags=100%, list=10%, signal=111%
GOBP_GLYCEROLIPID_BIOSYNTHETIC_PROCESS	202	-0.24067	-0.920545	0.657439	0.830503	1	2640	tags=20%, list=14%, signal=23%
GOBP_GLYCEROLIPID_CATABOLIC_PROCESS	50	-0.48227	-1.49432	0.0437567	0.316234	1	770	tags=14%, list=4%, signal=15%
GOBP_GLYCEROLIPID_METABOLIC_PROCESS	328	-0.294242	-1.19511	0.0703746	0.545415	1	2640	tags=21%, list=14%, signal=24%
GOBP_GLYCEROPHOSPHOLIPID_CATABOLIC_PROCESS	26	-0.485603	-1.31909	0.136041	0.441533	1	1386	tags=19%, list=7%, signal=21%
GOBP_GLYCEROPHOSPHOLIPID_METABOLIC_PROCESS	248	-0.272196	-1.06631	0.285874	0.672807	1	2602	tags=21%, list=13%, signal=23%
GOBP_GLYCINE_BIOSYNTHETIC_PROCESS	4	-0.668248	-1.17565	0.31943	0.564739	1	6312	tags=75%, list=33%, signal=111%
GOBP_GLYCINE_IMPORT_ACROSS_PLASMA_MEMBRANE	4	-0.845104	-1.44634	0.0546956	0.352063	1	78	tags=25%, list=0%, signal=25%
GOBP_GLYCINE_METABOLIC_PROCESS	11	-0.634272	-1.42029	0.0977918	0.367653	1	3469	tags=45%, list=18%, signal=55%
GOBP_GLYCINE_TRANSPORT	11	-0.555981	-1.24732	0.229279	0.502859	1	407	tags=18%, list=2%, signal=19%
GOBP_GLYCOLIPID_BIOSYNTHETIC_PROCESS	66	-0.406912	-1.33014	0.0801317	0.434475	1	1013	tags=14%, list=5%, signal=14%
GOBP_GLYCOLIPID_CATABOLIC_PROCESS	15	-0.52239	-1.2505	0.20221	0.500452	1	2687	tags=33%, list=14%, signal=39%
GOBP_GLYCOLYTIC_PROCESS	91	-0.243465	-0.836165	0.801733	0.899402	1	3815	tags=24%, list=20%, signal=30%
GOBP_GLYCOPROTEIN_CATABOLIC_PROCESS	31	-0.408319	-1.16178	0.253219	0.578414	1	2532	tags=39%, list=13%, signal=44%
GOBP_GLYCOSAMINOGLYCAN_CATABOLIC_PROCESS	22	-0.361122	-0.944249	0.529286	0.805007	1	3217	tags=32%, list=17%, signal=38%
GOBP_GLYCOSIDE_CATABOLIC_PROCESS	8	-0.537199	-1.10915	0.354518	0.627093	1	4818	tags=75%, list=25%, signal=100%
GOBP_GLYCOSIDE_METABOLIC_PROCESS	15	-0.473407	-1.13627	0.315229	0.600417	1	4818	tags=60%, list=25%, signal=80%
GOBP_GLYCOSPHINGOLIPID_BIOSYNTHETIC_PROCESS	30	-0.40806	-1.14323	0.27428	0.592479	1	767	tags=13%, list=4%, signal=14%
GOBP_GLYCOSPHINGOLIPID_METABOLIC_PROCESS	52	-0.383266	-1.18673	0.193231	0.553491	1	2687	tags=25%, list=14%, signal=29%
GOBP_GLYCOSYL_COMPOUND_BIOSYNTHETIC_PROCESS	18	-0.460303	-1.15028	0.29418	0.587925	1	2958	tags=39%, list=15%, signal=46%
GOBP_GLYCOSYL_COMPOUND_METABOLIC_PROCESS	66	-0.26398	-0.866324	0.721133	0.87639	1	3292	tags=27%, list=17%, signal=33%
GOBP_GLYCOSYLCERAMIDE_BIOSYNTHETIC_PROCESS	7	-0.701851	-1.41759	0.109148	0.370007	1	123	tags=43%, list=1%, signal=43%
GOBP_GLYCOSYLCERAMIDE_METABOLIC_PROCESS	16	-0.600602	-1.46017	0.0698413	0.345644	1	1421	tags=31%, list=7%, signal=34%
GOBP_GLYOXYLATE_METABOLIC_PROCESS	5	-0.853412	-1.58255	0.0247168	0.241038	1	1612	tags=60%, list=8%, signal=65%
GOBP_GMP_BIOSYNTHETIC_PROCESS	15	-0.39988	-0.967164	0.516437	0.775897	1	661	tags=13%, list=3%, signal=14%
GOBP_GMP_SALVAGE	9	-0.544168	-1.16162	0.299492	0.578388	1	661	tags=22%, list=3%, signal=23%
GOBP_GOLGI_DISASSEMBLY	6	-0.677049	-1.32182	0.158511	0.439682	1	372	tags=17%, list=2%, signal=17%
GOBP_GOLGI_TO_PLASMA_MEMBRANE_PROTEIN_TRANSPORT	38	-0.344591	-1.01519	0.412076	0.725007	1	978	tags=18%, list=5%, signal=19%
GOBP_GOLGI_TO_PLASMA_MEMBRANE_TRANSPORT	58	-0.295849	-0.937663	0.554817	0.813048	1	1958	tags=21%, list=10%, signal=23%
GOBP_GONADOTROPIN_SECRETION	13	-0.452143	-1.04291	0.414687	0.696044	1	1141	tags=23%, list=6%, signal=25%
GOBP_GPI_ANCHOR_METABOLIC_PROCESS	34	-0.474209	-1.35166	0.089568	0.414005	1	2322	tags=24%, list=12%, signal=27%
GOBP_GRANULOCYTE_ACTIVATION	34	-0.259609	-0.750596	0.866453	0.95483	1	3666	tags=29%, list=19%, signal=36%
GOBP_GRANULOCYTE_DIFFERENTIATION	37	-0.253037	-0.739537	0.878075	0.958619	1	2149	tags=14%, list=11%, signal=15%
GOBP_GRANZYME_MEDIATED_PROGRAMMED_CELL_DEATH_SIGNALING_PATHWAY	5	-0.686818	-1.26726	0.213483	0.485852	1	114	tags=20%, list=1%, signal=20%
GOBP_GROWTH_INVOLVED_IN_HEART_MORPHOGENESIS	4	-0.419246	-0.723805	0.782232	0.963986	1	4385	tags=75%, list=23%, signal=97%
GOBP_GROWTH_PLATE_CARTILAGE_CHONDROCYTE_DEVELOPMENT	5	-0.672085	-1.21814	0.262687	0.530057	1	5699	tags=80%, list=29%, signal=113%
GOBP_GROWTH_PLATE_CARTILAGE_DEVELOPMENT	23	-0.274266	-0.72316	0.861588	0.963845	1	2266	tags=17%, list=12%, signal=20%
GOBP_GTP_BIOSYNTHETIC_PROCESS	10	-0.493066	-1.07902	0.373822	0.660058	1	910	tags=20%, list=5%, signal=21%
GOBP_GTP_METABOLIC_PROCESS	25	-0.318067	-0.86187	0.650054	0.879112	1	2527	tags=24%, list=13%, signal=28%
GOBP_GUANINE_NUCLEOTIDE_TRANSPORT	5	-0.684868	-1.2501	0.240042	0.500719	1	3765	tags=60%, list=19%, signal=74%
GOBP_HAIR_CELL_DIFFERENTIATION	55	-0.369243	-1.15853	0.233974	0.579389	1	2951	tags=33%, list=15%, signal=38%
GOBP_HEAD_MORPHOGENESIS	45	-0.299725	-0.915101	0.583333	0.83277	1	4341	tags=31%, list=22%, signal=40%
GOBP_HEAD_SEGMENTATION	4	-0.731903	-1.26163	0.213472	0.488374	1	1896	tags=50%, list=10%, signal=55%
GOBP_HEART_TRABECULA_FORMATION	12	-0.219009	-0.497977	0.983087	0.997456	1	3499	tags=25%, list=18%, signal=30%
GOBP_HEART_TRABECULA_MORPHOGENESIS	33	-0.342296	-0.971969	0.483836	0.770824	1	2196	tags=24%, list=11%, signal=27%
GOBP_HEART_VALVE_FORMATION	13	-0.570049	-1.32304	0.165059	0.439579	1	3203	tags=38%, list=17%, signal=46%
GOBP_HEAT_GENERATION	16	-0.432535	-1.05012	0.396425	0.689352	1	1222	tags=25%, list=6%, signal=27%
GOBP_HEMATOPOIETIC_PROGENITOR_CELL_DIFFERENTIATION	146	-0.25323	-0.941934	0.598224	0.807242	1	2149	tags=14%, list=11%, signal=16%
GOBP_HEMATOPOIETIC_STEM_CELL_HOMEOSTASIS	29	-0.376827	-1.0443	0.38208	0.694709	1	256	tags=7%, list=1%, signal=7%
GOBP_HEMATOPOIETIC_STEM_CELL_MIGRATION	11	-0.424062	-0.934571	0.557235	0.815094	1	2113	tags=36%, list=11%, signal=41%
GOBP_HEMATOPOIETIC_STEM_CELL_MIGRATION_TO_BONE_MARROW	5	-0.586631	-1.07888	0.405037	0.660009	1	2113	tags=80%, list=11%, signal=90%
GOBP_HEME_BIOSYNTHETIC_PROCESS	25	-0.435051	-1.18987	0.213434	0.550713	1	1531	tags=20%, list=8%, signal=22%
GOBP_HEME_METABOLIC_PROCESS	34	-0.370575	-1.06394	0.352041	0.673994	1	1531	tags=15%, list=8%, signal=16%
GOBP_HEME_TRANSPORT	8	-0.684347	-1.4357	0.0937829	0.359245	1	237	tags=13%, list=1%, signal=13%
GOBP_HEMIDESMOSOME_ASSEMBLY	6	-0.736495	-1.41788	0.0998981	0.370236	1	46	tags=17%, list=0%, signal=17%
GOBP_HEMOGLOBIN_BIOSYNTHETIC_PROCESS	14	-0.58135	-1.35725	0.127681	0.407449	1	78	tags=7%, list=0%, signal=7%
GOBP_HEMOGLOBIN_METABOLIC_PROCESS	19	-0.453056	-1.14923	0.286645	0.588794	1	1246	tags=11%, list=6%, signal=11%
GOBP_HEMOSTASIS	142	-0.436069	-1.59755	0	0.223148	1	2460	tags=26%, list=13%, signal=30%
GOBP_HEPARAN_SULFATE_PROTEOGLYCAN_CATABOLIC_PROCESS	8	-0.545066	-1.11473	0.36246	0.622026	1	2092	tags=50%, list=11%, signal=56%
GOBP_HEPARIN_METABOLIC_PROCESS	12	-0.36363	-0.818123	0.694534	0.913445	1	80	tags=8%, list=0%, signal=8%
GOBP_HEPATIC_STELLATE_CELL_ACTIVATION	15	-0.345687	-0.835784	0.667715	0.899579	1	4105	tags=33%, list=21%, signal=42%
GOBP_HEPATIC_STELLATE_CELL_PROLIFERATION	5	-0.616509	-1.13485	0.333333	0.601218	1	4997	tags=60%, list=26%, signal=81%
GOBP_HEPATOCYTE_GROWTH_FACTOR_RECEPTOR_SIGNALING_PATHWAY	11	-0.438388	-0.966843	0.504578	0.776131	1	2982	tags=36%, list=15%, signal=43%
GOBP_HEPOXILIN_METABOLIC_PROCESS	9	-0.673514	-1.42555	0.10443	0.362728	1	2862	tags=56%, list=15%, signal=65%
GOBP_HETEROTYPIC_CELL_CELL_ADHESION	42	-0.457754	-1.38211	0.0827447	0.392393	1	827	tags=14%, list=4%, signal=15%
GOBP_HEXOSE_PHOSPHATE_TRANSPORT	4	-0.842179	-1.45459	0.0716511	0.349101	1	857	tags=50%, list=4%, signal=52%
GOBP_HIGH_DENSITY_LIPOPROTEIN_PARTICLE_ASSEMBLY	7	-0.796587	-1.57283	0.0325027	0.247833	1	1728	tags=57%, list=9%, signal=63%
GOBP_HIGH_DENSITY_LIPOPROTEIN_PARTICLE_CLEARANCE	8	-0.616464	-1.27142	0.21519	0.482003	1	2000	tags=50%, list=10%, signal=56%
GOBP_HIGH_DENSITY_LIPOPROTEIN_PARTICLE_REMODELING	11	-0.560331	-1.26545	0.198942	0.486574	1	959	tags=27%, list=5%, signal=29%
GOBP_HINDBRAIN_MORPHOGENESIS	59	-0.305172	-0.982175	0.474344	0.758716	1	1421	tags=15%, list=7%, signal=16%
GOBP_HINDBRAIN_RADIAL_GLIA_GUIDED_CELL_MIGRATION	15	-0.396667	-0.962284	0.48984	0.783195	1	1168	tags=27%, list=6%, signal=28%
GOBP_HINDBRAIN_TANGENTIAL_CELL_MIGRATION	4	-0.592914	-1.02181	0.49208	0.717898	1	348	tags=25%, list=2%, signal=25%
GOBP_HINDGUT_DEVELOPMENT	8	-0.341102	-0.703514	0.823465	0.972765	1	3129	tags=38%, list=16%, signal=45%
GOBP_HIPPO_SIGNALING	40	-0.294018	-0.869211	0.664841	0.873587	1	1210	tags=10%, list=6%, signal=11%
GOBP_HIS_PURKINJE_SYSTEM_DEVELOPMENT	4	-0.304978	-0.534558	0.947699	0.994611	1	13478	tags=100%, list=70%, signal=328%
GOBP_HISTAMINE_PRODUCTION_INVOLVED_IN_INFLAMMATORY_RESPONSE	10	-0.475204	-1.02477	0.430571	0.714804	1	1159	tags=20%, list=6%, signal=21%
GOBP_HISTIDINE_CATABOLIC_PROCESS	2	-0.629081	-0.944836	0.590361	0.804514	1	7194	tags=100%, list=37%, signal=159%
GOBP_HISTIDINE_METABOLIC_PROCESS	4	-0.391849	-0.678537	0.833333	0.976949	1	11794	tags=100%, list=61%, signal=255%
GOBP_HISTONE_DEACETYLATION	29	-0.240704	-0.665513	0.926882	0.979059	1	3653	tags=31%, list=19%, signal=38%
GOBP_HISTONE_DEMETHYLATION	9	-0.371814	-0.786368	0.731172	0.937643	1	231	tags=11%, list=1%, signal=11%
GOBP_HISTONE_H3_ACETYLATION	10	-0.249889	-0.547269	0.951648	0.993162	1	3402	tags=30%, list=18%, signal=36%
GOBP_HISTONE_H3_K27_METHYLATION	6	-0.337087	-0.650615	0.855102	0.981123	1	2870	tags=33%, list=15%, signal=39%
GOBP_HOMEOSTASIS_OF_NUMBER_OF_CELLS	339	-0.235896	-0.956219	0.586441	0.790581	1	3731	tags=24%, list=19%, signal=30%
GOBP_HOMEOSTASIS_OF_NUMBER_OF_CELLS_WITHIN_A_TISSUE	42	-0.360223	-1.08482	0.327722	0.653226	1	3555	tags=43%, list=18%, signal=52%
GOBP_HOMOCYSTEINE_METABOLIC_PROCESS	12	-0.339853	-0.782685	0.720573	0.939462	1	2751	tags=17%, list=14%, signal=19%
GOBP_HOMOTYPIC_CELL_CELL_ADHESION	70	-0.354872	-1.15141	0.22293	0.587666	1	2410	tags=26%, list=12%, signal=29%
GOBP_HORMONE_CATABOLIC_PROCESS	12	-0.36749	-0.837958	0.663202	0.897478	1	1940	tags=33%, list=10%, signal=37%
GOBP_HORMONE_METABOLIC_PROCESS	159	-0.275771	-1.02978	0.36031	0.709479	1	3148	tags=25%, list=16%, signal=29%
GOBP_HOST_MEDIATED_REGULATION_OF_INTESTINAL_MICROBIOTA_COMPOSITION	6	-0.516909	-0.991164	0.485864	0.750271	1	4114	tags=50%, list=21%, signal=63%
GOBP_HUMORAL_IMMUNE_RESPONSE	127	-0.497571	-1.79834	0.00106724	0.0656771	1	4697	tags=43%, list=24%, signal=56%
GOBP_HUMORAL_IMMUNE_RESPONSE_MEDIATED_BY_CIRCULATING_IMMUNOGLOBULIN	36	-0.542153	-1.58173	0.0240334	0.241027	1	3682	tags=42%, list=19%, signal=51%
GOBP_HYALOID_VASCULAR_PLEXUS_REGRESSION	6	-0.709081	-1.34077	0.146905	0.423626	1	2647	tags=33%, list=14%, signal=39%
GOBP_HYALURONAN_BIOSYNTHETIC_PROCESS	14	-0.246146	-0.580676	0.951087	0.988681	1	3761	tags=36%, list=19%, signal=44%
GOBP_HYALURONAN_CATABOLIC_PROCESS	15	-0.432851	-1.03546	0.401081	0.704482	1	3217	tags=33%, list=17%, signal=40%
GOBP_HYALURONAN_METABOLIC_PROCESS	34	-0.400851	-1.14558	0.255319	0.591741	1	3761	tags=32%, list=19%, signal=40%
GOBP_HYDROGEN_PEROXIDE_CATABOLIC_PROCESS	20	-0.255034	-0.649858	0.923648	0.981321	1	2205	tags=20%, list=11%, signal=23%
GOBP_HYDROGEN_SULFIDE_METABOLIC_PROCESS	5	-0.638924	-1.15389	0.337824	0.58445	1	2751	tags=40%, list=14%, signal=47%
GOBP_HYPEROSMOTIC_RESPONSE	19	-0.61834	-1.57251	0.0409664	0.247674	1	1183	tags=37%, list=6%, signal=39%
GOBP_HYPEROSMOTIC_SALINITY_RESPONSE	8	-0.580032	-1.18694	0.287293	0.553846	1	147	tags=13%, list=1%, signal=13%
GOBP_HYPERSENSITIVITY	23	-0.325356	-0.8567	0.665622	0.884248	1	4030	tags=48%, list=21%, signal=60%
GOBP_HYPOTONIC_RESPONSE	9	-0.491365	-1.03723	0.420382	0.702472	1	538	tags=22%, list=3%, signal=23%
GOBP_ICOSANOID_BIOSYNTHETIC_PROCESS	36	-0.327716	-0.958787	0.524004	0.787295	1	3647	tags=42%, list=19%, signal=51%
GOBP_ICOSANOID_CATABOLIC_PROCESS	6	-0.729968	-1.40101	0.102564	0.378214	1	2891	tags=67%, list=15%, signal=78%
GOBP_ICOSANOID_METABOLIC_PROCESS	73	-0.427274	-1.43121	0.0295405	0.360024	1	3397	tags=38%, list=18%, signal=46%
GOBP_IMMATURE_T_CELL_PROLIFERATION	15	-0.275757	-0.662893	0.890929	0.979428	1	4040	tags=27%, list=21%, signal=34%
GOBP_IMMUNE_COMPLEX_CLEARANCE	5	-0.491162	-0.889057	0.619914	0.854865	1	2795	tags=40%, list=14%, signal=47%
GOBP_IMMUNE_RESPONSE_REGULATING_CELL_SURFACE_RECEPTOR_SIGNALING_PATHWAY	209	-0.255525	-0.991511	0.463918	0.750163	1	3366	tags=22%, list=17%, signal=27%
GOBP_IMMUNE_RESPONSE_REGULATING_CELL_SURFACE_RECEPTOR_SIGNALING_PATHWAY_INVOLVED_IN_PHAGOCYTOSIS	9	-0.418264	-0.880391	0.599581	0.863623	1	375	tags=22%, list=2%, signal=23%
GOBP_IMMUNE_RESPONSE_TO_TUMOR_CELL	17	-0.465249	-1.14263	0.2949	0.5937	1	3217	tags=41%, list=17%, signal=49%
GOBP_IMMUNOGLOBULIN_PRODUCTION	119	-0.377086	-1.34707	0.0436242	0.419702	1	4620	tags=38%, list=24%, signal=49%
GOBP_IMMUNOGLOBULIN_PRODUCTION_INVOLVED_IN_IMMUNOGLOBULIN_MEDIATED_IMMUNE_RESPONSE	58	-0.217262	-0.692051	0.955882	0.973742	1	4557	tags=31%, list=24%, signal=40%
GOBP_IMMUNOLOGICAL_MEMORY_PROCESS	9	-0.426589	-0.902831	0.581081	0.843799	1	780	tags=22%, list=4%, signal=23%
GOBP_IMMUNOLOGICAL_SYNAPSE_FORMATION	12	-0.394075	-0.89415	0.599781	0.850628	1	414	tags=8%, list=2%, signal=9%
GOBP_IMP_BIOSYNTHETIC_PROCESS	14	-0.342502	-0.798542	0.723382	0.926924	1	3124	tags=21%, list=16%, signal=26%
GOBP_IMP_CATABOLIC_PROCESS	7	-0.435207	-0.875619	0.631139	0.868003	1	254	tags=14%, list=1%, signal=14%
GOBP_IMP_METABOLIC_PROCESS	22	-0.432304	-1.13481	0.276842	0.601119	1	254	tags=9%, list=1%, signal=9%
GOBP_IMP_SALVAGE	8	-0.495426	-1.00397	0.471597	0.737305	1	254	tags=13%, list=1%, signal=13%
GOBP_IMPORT_ACROSS_PLASMA_MEMBRANE	170	-0.281466	-1.04808	0.332207	0.69105	1	2758	tags=19%, list=14%, signal=22%
GOBP_IN_UTERO_EMBRYONIC_DEVELOPMENT	482	-0.229516	-0.958386	0.608952	0.787707	1	1830	tags=11%, list=9%, signal=12%
GOBP_INCLUSION_BODY_ASSEMBLY	24	-0.693094	-1.84575	0.0021692	0.0437525	0.9945	484	tags=17%, list=2%, signal=17%
GOBP_INDOLE_CONTAINING_COMPOUND_BIOSYNTHETIC_PROCESS	7	-0.75691	-1.53277	0.0442765	0.280462	1	1416	tags=43%, list=7%, signal=46%
GOBP_INDOLE_CONTAINING_COMPOUND_METABOLIC_PROCESS	22	-0.319454	-0.835806	0.69141	0.899889	1	1416	tags=18%, list=7%, signal=20%
GOBP_INFLAMMASOME_MEDIATED_SIGNALING_PATHWAY	42	-0.28014	-0.837932	0.75	0.897355	1	2660	tags=17%, list=14%, signal=19%
GOBP_INFLAMMATORY_CELL_APOPTOTIC_PROCESS	21	-0.304699	-0.797906	0.746067	0.927577	1	3826	tags=33%, list=20%, signal=41%
GOBP_INFLAMMATORY_RESPONSE_TO_ANTIGENIC_STIMULUS	64	-0.28685	-0.930001	0.582545	0.819	1	3261	tags=25%, list=17%, signal=30%
GOBP_INFLAMMATORY_RESPONSE_TO_WOUNDING	25	-0.498436	-1.34389	0.112988	0.420024	1	3467	tags=36%, list=18%, signal=44%
GOBP_INHIBITION_OF_NEUROEPITHELIAL_CELL_DIFFERENTIATION	5	-0.771576	-1.41996	0.0845361	0.367537	1	4410	tags=80%, list=23%, signal=104%
GOBP_INHIBITION_OF_NON_SKELETAL_TISSUE_MINERALIZATION	10	-0.441574	-0.969596	0.497863	0.773822	1	973	tags=30%, list=5%, signal=32%
GOBP_INNATE_IMMUNE_RESPONSE_IN_MUCOSA	5	-0.700677	-1.30597	0.178649	0.449844	1	4893	tags=80%, list=25%, signal=107%
GOBP_INNER_CELL_MASS_CELL_DIFFERENTIATION	7	-0.328018	-0.64466	0.87149	0.982319	1	2869	tags=29%, list=15%, signal=34%
GOBP_INNER_EAR_MORPHOGENESIS	98	-0.395135	-1.36908	0.0442478	0.399399	1	2951	tags=29%, list=15%, signal=34%
GOBP_INNER_EAR_RECEPTOR_CELL_FATE_COMMITMENT	5	-0.617393	-1.12981	0.341916	0.606232	1	4385	tags=40%, list=23%, signal=52%
GOBP_INNER_EAR_RECEPTOR_CELL_STEREOCILIUM_ORGANIZATION	42	-0.449841	-1.34747	0.0894901	0.420117	1	2409	tags=29%, list=12%, signal=33%
GOBP_INNER_MITOCHONDRIAL_MEMBRANE_ORGANIZATION	35	-0.307295	-0.893751	0.610929	0.850971	1	4033	tags=26%, list=21%, signal=32%
GOBP_INORGANIC_ANION_TRANSPORT	124	-0.347902	-1.25314	0.0696202	0.497093	1	2905	tags=26%, list=15%, signal=30%
GOBP_INOSINE_METABOLIC_PROCESS	7	-0.485253	-0.949925	0.536692	0.799773	1	254	tags=14%, list=1%, signal=14%
GOBP_INSULIN_RECEPTOR_RECYCLING	5	-0.506868	-0.918577	0.595032	0.831243	1	1817	tags=20%, list=9%, signal=22%
GOBP_INTEGRATED_STRESS_RESPONSE_SIGNALING	21	-0.456819	-1.18456	0.253012	0.555065	1	748	tags=14%, list=4%, signal=15%
GOBP_INTEGRIN_ACTIVATION	22	-0.439967	-1.16098	0.258489	0.578255	1	1177	tags=14%, list=6%, signal=15%
GOBP_INTEGRIN_BIOSYNTHETIC_PROCESS	5	-0.273628	-0.493161	0.975295	0.997892	1	14086	tags=100%, list=73%, signal=366%
GOBP_INTEGRIN_MEDIATED_SIGNALING_PATHWAY	91	-0.434153	-1.51011	0.0122358	0.299854	1	2992	tags=32%, list=15%, signal=38%
GOBP_INTERCELLULAR_TRANSPORT	6	-0.639034	-1.21644	0.270492	0.530113	1	348	tags=33%, list=2%, signal=34%
GOBP_INTERLEUKIN_1_BETA_PRODUCTION	80	-0.376908	-1.27601	0.0912162	0.476622	1	4381	tags=29%, list=23%, signal=37%
GOBP_INTERLEUKIN_1_MEDIATED_SIGNALING_PATHWAY	24	-0.289599	-0.761986	0.797849	0.947378	1	4811	tags=38%, list=25%, signal=50%
GOBP_INTERLEUKIN_1_PRODUCTION	97	-0.364184	-1.25867	0.0996785	0.491557	1	3888	tags=27%, list=20%, signal=33%
GOBP_INTERLEUKIN_10_PRODUCTION	52	-0.353387	-1.10945	0.262366	0.626963	1	4618	tags=31%, list=24%, signal=40%
GOBP_INTERLEUKIN_13_PRODUCTION	28	-0.648847	-1.80112	0.00321888	0.0633784	1	4605	tags=64%, list=24%, signal=84%
GOBP_INTERLEUKIN_17_MEDIATED_SIGNALING_PATHWAY	10	-0.200859	-0.439699	0.991525	0.99863	1	7185	tags=70%, list=37%, signal=111%
GOBP_INTERLEUKIN_17_PRODUCTION	34	-0.400103	-1.15641	0.239451	0.581562	1	3666	tags=35%, list=19%, signal=43%
GOBP_INTERLEUKIN_17A_MEDIATED_SIGNALING_PATHWAY	5	-0.404279	-0.741517	0.773218	0.958134	1	3205	tags=40%, list=17%, signal=48%
GOBP_INTERLEUKIN_2_PRODUCTION	60	-0.332476	-1.06778	0.336488	0.670608	1	2648	tags=27%, list=14%, signal=31%
GOBP_INTERLEUKIN_23_PRODUCTION	7	-0.713716	-1.40321	0.108602	0.376796	1	3666	tags=71%, list=19%, signal=88%
GOBP_INTERLEUKIN_3_MEDIATED_SIGNALING_PATHWAY	7	-0.625637	-1.23641	0.247959	0.513673	1	2271	tags=29%, list=12%, signal=32%
GOBP_INTERLEUKIN_33_MEDIATED_SIGNALING_PATHWAY	8	-0.775254	-1.61227	0.0286929	0.212522	1	384	tags=25%, list=2%, signal=25%
GOBP_INTERLEUKIN_33_PRODUCTION	4	-0.599448	-1.03667	0.479438	0.703072	1	2035	tags=25%, list=10%, signal=28%
GOBP_INTERLEUKIN_4_PRODUCTION	42	-0.593423	-1.77141	0.00219058	0.082149	1	2271	tags=31%, list=12%, signal=35%
GOBP_INTERLEUKIN_5_PRODUCTION	15	-0.642019	-1.53065	0.0382572	0.280421	1	435	tags=20%, list=2%, signal=20%
GOBP_INTERLEUKIN_6_MEDIATED_SIGNALING_PATHWAY	17	-0.446234	-1.09078	0.356531	0.645238	1	449	tags=12%, list=2%, signal=12%
GOBP_INTERLEUKIN_6_PRODUCTION	146	-0.404242	-1.49668	0.013363	0.31408	1	3870	tags=31%, list=20%, signal=38%
GOBP_INTERLEUKIN_8_PRODUCTION	59	-0.448044	-1.44097	0.0372399	0.354912	1	3666	tags=36%, list=19%, signal=44%
GOBP_INTERMEDIATE_FILAMENT_BASED_PROCESS	51	-0.406786	-1.27418	0.124486	0.478127	1	3057	tags=29%, list=16%, signal=35%
GOBP_INTERMEDIATE_FILAMENT_BUNDLE_ASSEMBLY	7	-0.550339	-1.10745	0.359563	0.629423	1	839	tags=43%, list=4%, signal=45%
GOBP_INTERMEDIATE_FILAMENT_ORGANIZATION	30	-0.562934	-1.58913	0.0248112	0.234654	1	3057	tags=43%, list=16%, signal=51%
GOBP_INTERMEMBRANE_LIPID_TRANSFER	8	-0.53066	-1.10079	0.377871	0.63694	1	77	tags=13%, list=0%, signal=13%
GOBP_INTERNEURON_MIGRATION	14	-0.371498	-0.876774	0.614035	0.867383	1	3926	tags=50%, list=20%, signal=63%
GOBP_INTESTINAL_ABSORPTION	25	-0.612694	-1.63982	0.0154696	0.186211	1	1186	tags=28%, list=6%, signal=30%
GOBP_INTESTINAL_EPITHELIAL_STRUCTURE_MAINTENANCE	8	-0.302187	-0.626806	0.896373	0.983083	1	961	tags=13%, list=5%, signal=13%
GOBP_INTESTINAL_LIPID_ABSORPTION	13	-0.510506	-1.17788	0.283925	0.562594	1	5647	tags=69%, list=29%, signal=98%
GOBP_INTESTINAL_STEM_CELL_HOMEOSTASIS	4	-0.662853	-1.15624	0.340494	0.581767	1	5656	tags=75%, list=29%, signal=106%
GOBP_INTRACELLULAR_ESTROGEN_RECEPTOR_SIGNALING_PATHWAY	47	-0.361805	-1.1065	0.291753	0.629904	1	1824	tags=15%, list=9%, signal=16%
GOBP_INTRACELLULAR_IRON_ION_HOMEOSTASIS	61	-0.406522	-1.30928	0.0909091	0.446902	1	2878	tags=21%, list=15%, signal=25%
GOBP_INTRACELLULAR_LIPID_TRANSPORT	42	-0.487801	-1.46377	0.0326442	0.342315	1	1759	tags=21%, list=9%, signal=24%
GOBP_INTRACELLULAR_MONOATOMIC_ANION_HOMEOSTASIS	12	-0.668164	-1.53606	0.0456476	0.277054	1	2216	tags=58%, list=11%, signal=66%
GOBP_INTRACELLULAR_MRNA_LOCALIZATION	13	-0.442548	-1.03589	0.421384	0.704213	1	91	tags=8%, list=0%, signal=8%
GOBP_INTRACELLULAR_NITROGEN_HOMEOSTASIS	4	-0.440039	-0.771382	0.737395	0.945118	1	2501	tags=50%, list=13%, signal=57%
GOBP_INTRACELLULAR_PH_ELEVATION	7	-0.529768	-1.05593	0.407487	0.683546	1	5572	tags=29%, list=29%, signal=40%
GOBP_INTRACELLULAR_PH_REDUCTION	43	-0.306395	-0.926676	0.565859	0.82174	1	564	tags=7%, list=3%, signal=7%
GOBP_INTRACELLULAR_PHOSPHATE_ION_HOMEOSTASIS	6	-0.491332	-0.917727	0.583949	0.831592	1	1257	tags=50%, list=6%, signal=53%
GOBP_INTRACELLULAR_POTASSIUM_ION_HOMEOSTASIS	11	-0.734284	-1.64054	0.0268528	0.185763	1	339	tags=36%, list=2%, signal=37%
GOBP_INTRACELLULAR_SODIUM_ION_HOMEOSTASIS	21	-0.69334	-1.79652	0.00217155	0.0661553	1	1257	tags=29%, list=6%, signal=31%
GOBP_INTRACELLULAR_SPHINGOLIPID_HOMEOSTASIS	6	-0.746805	-1.41332	0.100832	0.371465	1	1765	tags=33%, list=9%, signal=37%
GOBP_INTRACELLULAR_STEROL_TRANSPORT	32	-0.443627	-1.27354	0.145161	0.478452	1	1759	tags=22%, list=9%, signal=24%
GOBP_INTRACELLULAR_TRIGLYCERIDE_HOMEOSTASIS	7	-0.321789	-0.639626	0.870311	0.982615	1	1914	tags=29%, list=10%, signal=32%
GOBP_INTRACELLULAR_WATER_HOMEOSTASIS	7	-0.625588	-1.22587	0.246767	0.522732	1	3127	tags=71%, list=16%, signal=85%
GOBP_INTRINSIC_APOPTOTIC_SIGNALING_PATHWAY	304	-0.251784	-1.0072	0.397674	0.734378	1	3034	tags=22%, list=16%, signal=25%
GOBP_INTRINSIC_APOPTOTIC_SIGNALING_PATHWAY_BY_P53_CLASS_MEDIATOR	85	-0.262446	-0.888829	0.685777	0.854835	1	3108	tags=22%, list=16%, signal=27%
GOBP_INTRINSIC_APOPTOTIC_SIGNALING_PATHWAY_IN_RESPONSE_TO_DNA_DAMAGE	107	-0.325696	-1.14371	0.204372	0.592122	1	2947	tags=22%, list=15%, signal=26%
GOBP_INTRINSIC_APOPTOTIC_SIGNALING_PATHWAY_IN_RESPONSE_TO_DNA_DAMAGE_BY_P53_CLASS_MEDIATOR	44	-0.35316	-1.07851	0.330544	0.660117	1	909	tags=14%, list=5%, signal=14%
GOBP_INTRINSIC_APOPTOTIC_SIGNALING_PATHWAY_IN_RESPONSE_TO_HYDROGEN_PEROXIDE	7	-0.447515	-0.894592	0.595657	0.850541	1	2849	tags=43%, list=15%, signal=50%
GOBP_INTRINSIC_APOPTOTIC_SIGNALING_PATHWAY_IN_RESPONSE_TO_OXIDATIVE_STRESS	54	-0.331754	-1.04912	0.370763	0.690244	1	3006	tags=28%, list=16%, signal=33%
GOBP_IP_10_PRODUCTION	5	-0.843995	-1.53996	0.0318471	0.274935	1	1493	tags=40%, list=8%, signal=43%
GOBP_IRES_DEPENDENT_VIRAL_TRANSLATIONAL_INITIATION	11	-0.263281	-0.582246	0.938034	0.988612	1	2520	tags=18%, list=13%, signal=21%
GOBP_IRON_COORDINATION_ENTITY_TRANSPORT	11	-0.405516	-0.911077	0.579758	0.836397	1	237	tags=9%, list=1%, signal=9%
GOBP_IRON_IMPORT_INTO_CELL	9	-0.621536	-1.30381	0.175896	0.450008	1	2858	tags=44%, list=15%, signal=52%
GOBP_IRON_ION_IMPORT_ACROSS_PLASMA_MEMBRANE	4	-0.696337	-1.199	0.277365	0.542399	1	2080	tags=75%, list=11%, signal=84%
GOBP_IRON_ION_TRANSMEMBRANE_TRANSPORT	25	-0.61708	-1.62532	0.0218978	0.200895	1	2858	tags=40%, list=15%, signal=47%
GOBP_IRON_ION_TRANSPORT	48	-0.617755	-1.89898	0	0.0217075	0.889	2858	tags=38%, list=15%, signal=44%
GOBP_IRON_SULFUR_CLUSTER_ASSEMBLY	27	-0.373987	-1.01029	0.430283	0.731699	1	2654	tags=26%, list=14%, signal=30%
GOBP_ISG15_PROTEIN_CONJUGATION	5	-0.472919	-0.854272	0.651515	0.885877	1	3477	tags=40%, list=18%, signal=49%
GOBP_ISOCITRATE_METABOLIC_PROCESS	6	-0.781363	-1.51817	0.0501601	0.293257	1	2667	tags=50%, list=14%, signal=58%
GOBP_ISOLEUCINE_METABOLIC_PROCESS	8	-0.673354	-1.38015	0.121925	0.393366	1	530	tags=25%, list=3%, signal=26%
GOBP_ISOPENTENYL_DIPHOSPHATE_BIOSYNTHETIC_PROCESS	4	-0.814444	-1.41939	0.0880829	0.368552	1	3602	tags=100%, list=19%, signal=123%
GOBP_ISOPRENOID_BIOSYNTHETIC_PROCESS	30	-0.441746	-1.24011	0.160576	0.509505	1	4281	tags=53%, list=22%, signal=68%
GOBP_ISOPRENOID_METABOLIC_PROCESS	75	-0.355202	-1.19093	0.168662	0.549925	1	4281	tags=37%, list=22%, signal=48%
GOBP_KERATAN_SULFATE_METABOLIC_PROCESS	5	-0.252992	-0.469126	0.9814	0.998199	1	14486	tags=100%, list=75%, signal=395%
GOBP_KERATINOCYTE_APOPTOTIC_PROCESS	7	-0.612907	-1.21751	0.277419	0.530224	1	3587	tags=57%, list=19%, signal=70%
GOBP_KETONE_BIOSYNTHETIC_PROCESS	41	-0.323789	-0.963309	0.497338	0.780885	1	4117	tags=39%, list=21%, signal=49%
GOBP_KETONE_BODY_METABOLIC_PROCESS	7	-0.341418	-0.674952	0.841237	0.9768	1	1031	tags=14%, list=5%, signal=15%
GOBP_KETONE_CATABOLIC_PROCESS	10	-0.589221	-1.28635	0.204521	0.465088	1	3111	tags=60%, list=16%, signal=71%
GOBP_KIDNEY_EPITHELIUM_DEVELOPMENT	130	-0.320827	-1.15188	0.174863	0.58758	1	1441	tags=16%, list=7%, signal=17%
GOBP_KIDNEY_MORPHOGENESIS	89	-0.295586	-1.00961	0.42948	0.732064	1	1241	tags=15%, list=6%, signal=16%
GOBP_KILLING_BY_HOST_OF_SYMBIONT_CELLS	10	-0.500965	-1.09196	0.369085	0.644717	1	5235	tags=40%, list=27%, signal=55%
GOBP_KILLING_OF_CELLS_OF_ANOTHER_ORGANISM	46	-0.227968	-0.694131	0.930704	0.973993	1	5235	tags=30%, list=27%, signal=42%
GOBP_KYNURENINE_METABOLIC_PROCESS	6	-0.711489	-1.35813	0.133544	0.407496	1	3626	tags=67%, list=19%, signal=82%
GOBP_L_ALPHA_AMINO_ACID_TRANSMEMBRANE_TRANSPORT	57	-0.355961	-1.14372	0.234065	0.592293	1	3229	tags=21%, list=17%, signal=25%
GOBP_L_AMINO_ACID_TRANSPORT	71	-0.32918	-1.08917	0.286813	0.647575	1	3229	tags=21%, list=17%, signal=25%
GOBP_L_ARGININE_IMPORT_ACROSS_PLASMA_MEMBRANE	5	-0.722309	-1.34301	0.157895	0.421043	1	3072	tags=40%, list=16%, signal=48%
GOBP_L_ASCORBIC_ACID_BIOSYNTHETIC_PROCESS	3	-0.729815	-1.19009	0.296142	0.550408	1	3173	tags=33%, list=16%, signal=40%
GOBP_L_ASCORBIC_ACID_METABOLIC_PROCESS	7	-0.421102	-0.850535	0.630965	0.888301	1	3173	tags=29%, list=16%, signal=34%
GOBP_L_GLUTAMATE_IMPORT	34	-0.274744	-0.775695	0.827878	0.941977	1	158	tags=6%, list=1%, signal=6%
GOBP_L_GLUTAMATE_IMPORT_ACROSS_PLASMA_MEMBRANE	16	-0.337002	-0.812237	0.721193	0.917818	1	87	tags=6%, list=0%, signal=6%
GOBP_L_GLUTAMATE_TRANSMEMBRANE_TRANSPORT	25	-0.343158	-0.909481	0.57801	0.838234	1	158	tags=8%, list=1%, signal=8%
GOBP_L_GLUTAMINE_IMPORT_ACROSS_PLASMA_MEMBRANE	5	-0.580999	-1.06136	0.440538	0.676624	1	3229	tags=20%, list=17%, signal=24%
GOBP_L_HISTIDINE_TRANSMEMBRANE_TRANSPORT	5	-0.467447	-0.868194	0.639752	0.874276	1	10329	tags=100%, list=53%, signal=214%
GOBP_L_LYSINE_TRANSMEMBRANE_TRANSPORT	4	-0.774839	-1.36393	0.131915	0.403307	1	3072	tags=50%, list=16%, signal=59%
GOBP_L_LYSINE_TRANSPORT	6	-0.723157	-1.38612	0.13525	0.390206	1	4208	tags=50%, list=22%, signal=64%
GOBP_L_METHIONINE_SALVAGE_FROM_METHYLTHIOADENOSINE	5	-0.675918	-1.21547	0.270899	0.530444	1	6288	tags=100%, list=32%, signal=148%
GOBP_L_PHENYLALANINE_METABOLIC_PROCESS	6	-0.941605	-1.84449	0	0.0442023	0.996	95	tags=33%, list=0%, signal=33%
GOBP_L_SERINE_CATABOLIC_PROCESS	5	-0.736844	-1.33736	0.150826	0.425155	1	5061	tags=80%, list=26%, signal=108%
GOBP_L_SERINE_METABOLIC_PROCESS	9	-0.504754	-1.07699	0.383871	0.662021	1	463	tags=33%, list=2%, signal=34%
GOBP_L_SERINE_TRANSPORT	5	-0.262175	-0.481239	0.976067	0.998246	1	3229	tags=20%, list=17%, signal=24%
GOBP_LABYRINTHINE_LAYER_MORPHOGENESIS	24	-0.371121	-0.984147	0.476038	0.756811	1	435	tags=8%, list=2%, signal=9%
GOBP_LACRIMAL_GLAND_DEVELOPMENT	7	-0.843595	-1.70796	0.00718686	0.128797	1	961	tags=43%, list=5%, signal=45%
GOBP_LACTATE_METABOLIC_PROCESS	21	-0.381846	-0.997444	0.448	0.743349	1	2293	tags=33%, list=12%, signal=38%
GOBP_LACTATE_TRANSMEMBRANE_TRANSPORT	5	-0.474377	-0.856956	0.651138	0.88427	1	227	tags=20%, list=1%, signal=20%
GOBP_LACTATE_TRANSPORT	5	-0.474377	-0.869595	0.627188	0.873508	1	227	tags=20%, list=1%, signal=20%
GOBP_LACTATION	31	-0.468372	-1.3311	0.0950888	0.433539	1	525	tags=19%, list=3%, signal=20%
GOBP_LAMELLIPODIUM_ASSEMBLY	71	-0.361229	-1.1912	0.183476	0.549704	1	1846	tags=14%, list=10%, signal=16%
GOBP_LAMELLIPODIUM_MORPHOGENESIS	16	-0.498484	-1.20692	0.227178	0.535316	1	1917	tags=31%, list=10%, signal=35%
GOBP_LAMELLIPODIUM_ORGANIZATION	90	-0.39258	-1.35799	0.0556745	0.407569	1	1917	tags=18%, list=10%, signal=20%
GOBP_LATE_ENDOSOME_TO_VACUOLE_TRANSPORT	25	-0.302281	-0.799545	0.733475	0.926557	1	4769	tags=32%, list=25%, signal=42%
GOBP_LATE_ENDOSOME_TO_VACUOLE_TRANSPORT_VIA_MULTIVESICULAR_BODY_SORTING_PATHWAY	16	-0.418294	-1.03225	0.407448	0.706479	1	4769	tags=38%, list=25%, signal=50%
GOBP_LATERAL_MESODERM_DEVELOPMENT	16	-0.301614	-0.713238	0.845511	0.967918	1	1990	tags=19%, list=10%, signal=21%
GOBP_LATERAL_SPROUTING_FROM_AN_EPITHELIUM	13	-0.522861	-1.21901	0.247191	0.528459	1	1990	tags=31%, list=10%, signal=34%
GOBP_LATERAL_VENTRICLE_DEVELOPMENT	12	-0.580107	-1.31132	0.15011	0.445573	1	1183	tags=33%, list=6%, signal=35%
GOBP_LENS_DEVELOPMENT_IN_CAMERA_TYPE_EYE	74	-0.333791	-1.10803	0.287107	0.628628	1	1107	tags=14%, list=6%, signal=14%
GOBP_LENS_FIBER_CELL_DEVELOPMENT	13	-0.656062	-1.52741	0.0529661	0.283898	1	3057	tags=54%, list=16%, signal=64%
GOBP_LENS_FIBER_CELL_DIFFERENTIATION	32	-0.444709	-1.26514	0.136025	0.486408	1	1107	tags=19%, list=6%, signal=20%
GOBP_LENS_FIBER_CELL_MORPHOGENESIS	5	-0.675881	-1.2319	0.257609	0.518184	1	1107	tags=60%, list=6%, signal=64%
GOBP_LENS_INDUCTION_IN_CAMERA_TYPE_EYE	7	-0.322964	-0.639402	0.885562	0.982434	1	2524	tags=29%, list=13%, signal=33%
GOBP_LENS_MORPHOGENESIS_IN_CAMERA_TYPE_EYE	25	-0.358518	-0.966681	0.485043	0.776164	1	2738	tags=28%, list=14%, signal=33%
GOBP_LEPTOTENE	5	-0.30149	-0.550378	0.94274	0.992883	1	6392	tags=60%, list=33%, signal=89%
GOBP_LEUCINE_CATABOLIC_PROCESS	5	-0.704107	-1.29645	0.186906	0.45743	1	4422	tags=40%, list=23%, signal=52%
GOBP_LEUCINE_METABOLIC_PROCESS	7	-0.698474	-1.39158	0.110759	0.38692	1	1031	tags=29%, list=5%, signal=30%
GOBP_LEUKEMIA_INHIBITORY_FACTOR_SIGNALING_PATHWAY	4	-0.723949	-1.26311	0.210921	0.487458	1	3339	tags=50%, list=17%, signal=60%
GOBP_LEUKOCYTE_ACTIVATION_INVOLVED_IN_INFLAMMATORY_RESPONSE	42	-0.343696	-1.02362	0.408497	0.715543	1	2221	tags=19%, list=11%, signal=21%
GOBP_LEUKOCYTE_ADHESION_TO_ARTERIAL_ENDOTHELIAL_CELL	4	-0.529521	-0.913285	0.60443	0.834074	1	4679	tags=50%, list=24%, signal=66%
GOBP_LEUKOCYTE_AGGREGATION	14	-0.535096	-1.27733	0.186735	0.475657	1	3120	tags=36%, list=16%, signal=43%
GOBP_LEUKOCYTE_APOPTOTIC_PROCESS	111	-0.2423	-0.85982	0.776584	0.881506	1	4080	tags=30%, list=21%, signal=37%
GOBP_LEUKOCYTE_CELL_CELL_ADHESION	331	-0.273455	-1.10177	0.190045	0.63574	1	3574	tags=24%, list=18%, signal=28%
GOBP_LEUKOCYTE_CHEMOTAXIS	173	-0.334155	-1.2556	0.067033	0.494966	1	2951	tags=25%, list=15%, signal=30%
GOBP_LEUKOCYTE_CHEMOTAXIS_INVOLVED_IN_INFLAMMATORY_RESPONSE	6	-0.328168	-0.635508	0.860294	0.982693	1	4861	tags=50%, list=25%, signal=67%
GOBP_LEUKOCYTE_DEGRANULATION	68	-0.347138	-1.12481	0.262857	0.611417	1	3144	tags=26%, list=16%, signal=31%
GOBP_LEUKOCYTE_HOMEOSTASIS	121	-0.262663	-0.93555	0.593541	0.815141	1	4675	tags=37%, list=24%, signal=49%
GOBP_LEUKOCYTE_MEDIATED_CYTOTOXICITY	96	-0.373991	-1.31437	0.0642002	0.445591	1	4159	tags=38%, list=21%, signal=48%
GOBP_LEUKOCYTE_MEDIATED_IMMUNITY	319	-0.319334	-1.29062	0.0133333	0.461527	1	4658	tags=36%, list=24%, signal=46%
GOBP_LEUKOCYTE_MIGRATION	300	-0.336921	-1.35056	0.00559284	0.415252	1	2564	tags=22%, list=13%, signal=25%
GOBP_LEUKOCYTE_PROLIFERATION	313	-0.317558	-1.27397	0.0209302	0.477692	1	2955	tags=22%, list=15%, signal=26%
GOBP_LEUKOTRIENE_B4_METABOLIC_PROCESS	3	-0.657383	-1.07019	0.429735	0.668018	1	2327	tags=67%, list=12%, signal=76%
GOBP_LEUKOTRIENE_BIOSYNTHETIC_PROCESS	9	-0.575251	-1.21634	0.244748	0.530117	1	5304	tags=78%, list=27%, signal=107%
GOBP_LEUKOTRIENE_CATABOLIC_PROCESS	3	-0.657383	-1.06613	0.433472	0.673067	1	2327	tags=67%, list=12%, signal=76%
GOBP_LEUKOTRIENE_METABOLIC_PROCESS	16	-0.541847	-1.29903	0.172157	0.455248	1	2339	tags=38%, list=12%, signal=43%
GOBP_LEUKOTRIENE_TRANSPORT	5	-0.556057	-1.02817	0.456498	0.710973	1	973	tags=20%, list=5%, signal=21%
GOBP_LEYDIG_CELL_DIFFERENTIATION	10	-0.33207	-0.729145	0.790554	0.961436	1	3928	tags=30%, list=20%, signal=38%
GOBP_LIGHT_ADAPTION	5	-0.279989	-0.518973	0.959034	0.995395	1	4776	tags=40%, list=25%, signal=53%
GOBP_LIMB_BUD_FORMATION	9	-0.662316	-1.40029	0.100102	0.378992	1	3652	tags=78%, list=19%, signal=96%
GOBP_LINOLEIC_ACID_METABOLIC_PROCESS	14	-0.652668	-1.55001	0.0567823	0.27099	1	2862	tags=50%, list=15%, signal=59%
GOBP_LIPID_CATABOLIC_PROCESS	258	-0.496223	-1.96023	0	0.010794	0.5205	3335	tags=36%, list=17%, signal=42%
GOBP_LIPID_DIGESTION	13	-0.744957	-1.74674	0.0077951	0.100564	1	1283	tags=46%, list=7%, signal=49%
GOBP_LIPID_DROPLET_DISASSEMBLY	7	-0.62068	-1.2319	0.239407	0.517968	1	3589	tags=43%, list=19%, signal=53%
GOBP_LIPID_DROPLET_FORMATION	11	-0.455147	-1.03211	0.409802	0.706454	1	4920	tags=45%, list=25%, signal=61%
GOBP_LIPID_DROPLET_ORGANIZATION	32	-0.349718	-0.991099	0.46138	0.750242	1	3589	tags=25%, list=19%, signal=31%
GOBP_LIPID_HOMEOSTASIS	139	-0.344043	-1.25785	0.0798274	0.492768	1	2000	tags=17%, list=10%, signal=18%
GOBP_LIPID_LOCALIZATION	405	-0.294298	-1.20591	0.0444444	0.537266	1	3436	tags=25%, list=18%, signal=30%
GOBP_LIPID_MODIFICATION	175	-0.345291	-1.28667	0.0479376	0.464807	1	3302	tags=32%, list=17%, signal=38%
GOBP_LIPID_OXIDATION	106	-0.546007	-1.94013	0	0.0129192	0.6555	3302	tags=40%, list=17%, signal=47%
GOBP_LIPID_STORAGE	79	-0.380864	-1.27892	0.0899123	0.473355	1	2451	tags=22%, list=13%, signal=25%
GOBP_LIPID_TRANSPORT_ACROSS_BLOOD_BRAIN_BARRIER	5	-0.704963	-1.25782	0.217125	0.492614	1	5725	tags=100%, list=30%, signal=142%
GOBP_LIPOPHAGY	7	-0.576276	-1.15965	0.309549	0.578975	1	3717	tags=57%, list=19%, signal=71%
GOBP_LIPOPROTEIN_BIOSYNTHETIC_PROCESS	97	-0.355503	-1.24323	0.118026	0.506517	1	2322	tags=21%, list=12%, signal=23%
GOBP_LIPOPROTEIN_CATABOLIC_PROCESS	16	-0.637646	-1.55739	0.0389884	0.263031	1	3335	tags=44%, list=17%, signal=53%
GOBP_LIPOPROTEIN_LOCALIZATION	17	-0.363504	-0.904934	0.582418	0.841757	1	3318	tags=29%, list=17%, signal=35%
GOBP_LIPOPROTEIN_METABOLIC_PROCESS	125	-0.399589	-1.43261	0.0158061	0.359906	1	2322	tags=21%, list=12%, signal=23%
GOBP_LIPOSACCHARIDE_METABOLIC_PROCESS	92	-0.430436	-1.4934	0.0154525	0.31689	1	2687	tags=25%, list=14%, signal=29%
GOBP_LIPOXIN_A4_METABOLIC_PROCESS	3	-0.861189	-1.42675	0.070297	0.363006	1	2695	tags=100%, list=14%, signal=116%
GOBP_LIPOXIN_METABOLIC_PROCESS	4	-0.758886	-1.3151	0.170011	0.444635	1	4679	tags=100%, list=24%, signal=132%
GOBP_LIPOXYGENASE_PATHWAY	9	-0.628817	-1.34529	0.143167	0.420186	1	5274	tags=78%, list=27%, signal=107%
GOBP_LIVER_MORPHOGENESIS	30	-0.461798	-1.28175	0.148268	0.470538	1	4105	tags=50%, list=21%, signal=63%
GOBP_LIVER_REGENERATION	12	-0.358356	-0.817921	0.676313	0.913611	1	2886	tags=25%, list=15%, signal=29%
GOBP_LONG_CHAIN_FATTY_ACID_BIOSYNTHETIC_PROCESS	18	-0.742459	-1.85375	0.0032967	0.0400416	0.9895	2862	tags=61%, list=15%, signal=72%
GOBP_LONG_CHAIN_FATTY_ACID_CATABOLIC_PROCESS	8	-0.622541	-1.27872	0.209903	0.473582	1	2327	tags=63%, list=12%, signal=71%
GOBP_LONG_CHAIN_FATTY_ACID_METABOLIC_PROCESS	72	-0.485508	-1.61646	0.00865801	0.209454	1	2862	tags=40%, list=15%, signal=47%
GOBP_LOOP_OF_HENLE_DEVELOPMENT	9	-0.637614	-1.35669	0.143167	0.40794	1	4410	tags=56%, list=23%, signal=72%
GOBP_LOW_DENSITY_LIPOPROTEIN_PARTICLE_CLEARANCE	18	-0.438235	-1.09646	0.334737	0.642454	1	891	tags=17%, list=5%, signal=17%
GOBP_LOW_DENSITY_LIPOPROTEIN_PARTICLE_REMODELING	7	-0.623195	-1.24987	0.222222	0.501016	1	405	tags=29%, list=2%, signal=29%
GOBP_LOW_DENSITY_LIPOPROTEIN_RECEPTOR_PARTICLE_METABOLIC_PROCESS	6	-0.545182	-1.04489	0.441909	0.694422	1	1316	tags=33%, list=7%, signal=36%
GOBP_LUNG_ALVEOLUS_DEVELOPMENT	58	-0.344177	-1.09776	0.298137	0.640529	1	3769	tags=38%, list=19%, signal=47%
GOBP_LUNG_ASSOCIATED_MESENCHYME_DEVELOPMENT	7	-0.753176	-1.51494	0.0625	0.295968	1	2044	tags=43%, list=11%, signal=48%
GOBP_LUNG_LOBE_DEVELOPMENT	8	-0.669875	-1.40934	0.106878	0.373785	1	1990	tags=38%, list=10%, signal=42%
GOBP_LUNG_MORPHOGENESIS	63	-0.349695	-1.12911	0.25132	0.607101	1	2949	tags=30%, list=15%, signal=35%
GOBP_LUNG_VASCULATURE_DEVELOPMENT	11	-0.393894	-0.866836	0.649635	0.875674	1	1896	tags=36%, list=10%, signal=40%
GOBP_LUTEINIZING_HORMONE_SECRETION	8	-0.305601	-0.626697	0.889009	0.982988	1	3313	tags=25%, list=17%, signal=30%
GOBP_LYMPH_NODE_DEVELOPMENT	24	-0.468254	-1.23742	0.192225	0.512197	1	3950	tags=42%, list=20%, signal=52%
GOBP_LYMPH_VESSEL_DEVELOPMENT	30	-0.50017	-1.40267	0.0733753	0.376588	1	1209	tags=30%, list=6%, signal=32%
GOBP_LYMPH_VESSEL_MORPHOGENESIS	22	-0.575813	-1.48969	0.0470711	0.319681	1	1209	tags=32%, list=6%, signal=34%
GOBP_LYMPHATIC_ENDOTHELIAL_CELL_DIFFERENTIATION	8	-0.557848	-1.15058	0.312169	0.587625	1	1054	tags=38%, list=5%, signal=40%
GOBP_LYMPHOCYTE_ACTIVATION_INVOLVED_IN_IMMUNE_RESPONSE	160	-0.258676	-0.966341	0.514069	0.776072	1	4618	tags=29%, list=24%, signal=38%
GOBP_LYMPHOCYTE_AGGREGATION	5	-0.520079	-0.972836	0.515991	0.769806	1	3120	tags=40%, list=16%, signal=48%
GOBP_LYMPHOCYTE_APOPTOTIC_PROCESS	83	-0.293702	-1.0016	0.446035	0.739894	1	3335	tags=27%, list=17%, signal=32%
GOBP_LYMPHOCYTE_CHEMOTAXIS	35	-0.35951	-1.04619	0.381915	0.692606	1	2507	tags=23%, list=13%, signal=26%
GOBP_LYMPHOCYTE_MEDIATED_IMMUNITY	236	-0.303862	-1.18201	0.103448	0.557517	1	4658	tags=36%, list=24%, signal=47%
GOBP_LYMPHOCYTE_MIGRATION	82	-0.28111	-0.9487	0.538037	0.800337	1	2564	tags=20%, list=13%, signal=22%
GOBP_LYMPHOID_PROGENITOR_CELL_DIFFERENTIATION	24	-0.316271	-0.844917	0.666302	0.891432	1	1990	tags=21%, list=10%, signal=23%
GOBP_LYSOSOMAL_LUMEN_ACIDIFICATION	13	-0.298989	-0.687678	0.864407	0.97468	1	4644	tags=54%, list=24%, signal=71%
GOBP_LYSOSOMAL_MEMBRANE_ORGANIZATION	14	-0.591818	-1.40921	0.106223	0.373486	1	3790	tags=50%, list=20%, signal=62%
GOBP_MACROAUTOPHAGY	258	-0.230429	-0.90817	0.746433	0.838716	1	2874	tags=17%, list=15%, signal=19%
GOBP_MACROPHAGE_ACTIVATION	87	-0.282823	-0.966825	0.509595	0.775994	1	2221	tags=17%, list=11%, signal=19%
GOBP_MACROPHAGE_ACTIVATION_INVOLVED_IN_IMMUNE_RESPONSE	15	-0.580958	-1.39191	0.0995763	0.386991	1	3366	tags=33%, list=17%, signal=40%
GOBP_MACROPHAGE_COLONY_STIMULATING_FACTOR_SIGNALING_PATHWAY	5	-0.799275	-1.47438	0.0647858	0.33246	1	2000	tags=40%, list=10%, signal=45%
GOBP_MACROPHAGE_CYTOKINE_PRODUCTION	44	-0.579524	-1.75245	0.00215983	0.0959308	1	2199	tags=25%, list=11%, signal=28%
GOBP_MACROPHAGE_DIFFERENTIATION	52	-0.432869	-1.34571	0.0698925	0.420741	1	3666	tags=35%, list=19%, signal=43%
GOBP_MACROPHAGE_FUSION	6	-0.803376	-1.55172	0.0427083	0.268839	1	3366	tags=67%, list=17%, signal=81%
GOBP_MACROPHAGE_MIGRATION	55	-0.372321	-1.17359	0.198394	0.567726	1	2947	tags=29%, list=15%, signal=34%
GOBP_MACROPHAGE_PROLIFERATION	12	-0.492458	-1.11927	0.325	0.616677	1	2000	tags=42%, list=10%, signal=46%
GOBP_MACROPINOCYTOSIS	9	-0.622676	-1.31954	0.18259	0.440967	1	1535	tags=44%, list=8%, signal=48%
GOBP_MAGNESIUM_ION_TRANSPORT	16	-0.369464	-0.894389	0.598309	0.850274	1	893	tags=19%, list=5%, signal=20%
GOBP_MAINTENANCE_OF_BLOOD_BRAIN_BARRIER	20	-0.559605	-1.43598	0.0699454	0.359853	1	535	tags=30%, list=3%, signal=31%
GOBP_MAINTENANCE_OF_LENS_TRANSPARENCY	7	-0.579464	-1.1653	0.303477	0.575259	1	538	tags=29%, list=3%, signal=29%
GOBP_MAINTENANCE_OF_LOCATION	310	-0.247983	-0.990174	0.487972	0.750455	1	2756	tags=18%, list=14%, signal=20%
GOBP_MAINTENANCE_OF_PROTEIN_LOCALIZATION_IN_ENDOPLASMIC_RETICULUM	12	-0.541791	-1.22664	0.223517	0.52226	1	2747	tags=33%, list=14%, signal=39%
GOBP_MAINTENANCE_OF_PROTEIN_LOCALIZATION_IN_ORGANELLE	42	-0.438312	-1.32124	0.107692	0.439756	1	2747	tags=29%, list=14%, signal=33%
GOBP_MAINTENANCE_OF_PROTEIN_LOCATION	101	-0.341953	-1.19609	0.147799	0.544216	1	2752	tags=18%, list=14%, signal=21%
GOBP_MAINTENANCE_OF_PROTEIN_LOCATION_IN_CELL	68	-0.355965	-1.17011	0.187905	0.571197	1	2747	tags=21%, list=14%, signal=24%
GOBP_MAINTENANCE_OF_PROTEIN_LOCATION_IN_EXTRACELLULAR_REGION	6	-0.348346	-0.674495	0.824468	0.976835	1	12638	tags=100%, list=65%, signal=287%
GOBP_MAINTENANCE_OF_PROTEIN_LOCATION_IN_MITOCHONDRION	5	-0.474437	-0.861493	0.637234	0.879189	1	3981	tags=60%, list=21%, signal=75%
GOBP_MAINTENANCE_OF_PROTEIN_LOCATION_IN_NUCLEUS	24	-0.382111	-1.0232	0.424209	0.716182	1	2745	tags=25%, list=14%, signal=29%
GOBP_MALATE_ASPARTATE_SHUTTLE	5	-0.500586	-0.917428	0.589	0.831748	1	158	tags=20%, list=1%, signal=20%
GOBP_MALATE_METABOLIC_PROCESS	8	-0.29208	-0.602015	0.896552	0.987317	1	6167	tags=50%, list=32%, signal=73%
GOBP_MALE_GENITALIA_DEVELOPMENT	17	-0.218363	-0.533139	0.975506	0.994417	1	2524	tags=18%, list=13%, signal=20%
GOBP_MALE_SEX_DETERMINATION	10	-0.421185	-0.91886	0.561571	0.831705	1	2495	tags=30%, list=13%, signal=34%
GOBP_MALE_SEX_DIFFERENTIATION	125	-0.249702	-0.906839	0.711417	0.83942	1	2604	tags=17%, list=13%, signal=19%
GOBP_MAMMALIAN_OOGENESIS_STAGE	11	-0.60353	-1.36608	0.134831	0.402064	1	386	tags=18%, list=2%, signal=19%
GOBP_MAMMARY_DUCT_TERMINAL_END_BUD_GROWTH	5	-0.631424	-1.16819	0.324814	0.572998	1	1070	tags=40%, list=6%, signal=42%
GOBP_MAMMARY_GLAND_ALVEOLUS_DEVELOPMENT	19	-0.64824	-1.63414	0.0312849	0.189285	1	838	tags=26%, list=4%, signal=27%
GOBP_MAMMARY_GLAND_BRANCHING_INVOLVED_IN_THELARCHE	5	-0.424754	-0.772587	0.725	0.943948	1	3217	tags=40%, list=17%, signal=48%
GOBP_MAMMARY_GLAND_DEVELOPMENT	118	-0.384254	-1.37015	0.038176	0.399321	1	1107	tags=14%, list=6%, signal=15%
GOBP_MAMMARY_GLAND_DUCT_MORPHOGENESIS	36	-0.448942	-1.29201	0.127503	0.460631	1	1350	tags=22%, list=7%, signal=24%
GOBP_MAMMARY_GLAND_EPITHELIAL_CELL_DIFFERENTIATION	16	-0.586555	-1.42064	0.0864745	0.367799	1	3555	tags=44%, list=18%, signal=54%
GOBP_MAMMARY_GLAND_EPITHELIUM_DEVELOPMENT	69	-0.391993	-1.29974	0.0756757	0.454353	1	1350	tags=16%, list=7%, signal=17%
GOBP_MAMMARY_GLAND_FORMATION	8	-0.540801	-1.10478	0.369634	0.631647	1	2938	tags=38%, list=15%, signal=44%
GOBP_MAMMARY_GLAND_INVOLUTION	8	-0.697638	-1.42361	0.100823	0.365453	1	3148	tags=50%, list=16%, signal=60%
GOBP_MAMMARY_GLAND_MORPHOGENESIS	51	-0.410657	-1.26836	0.122995	0.484684	1	1984	tags=22%, list=10%, signal=24%
GOBP_MANCHETTE_ASSEMBLY	7	-0.389304	-0.783442	0.724501	0.939577	1	1689	tags=29%, list=9%, signal=31%
GOBP_MANGANESE_ION_TRANSMEMBRANE_TRANSPORT	6	-0.5646	-1.0949	0.393971	0.643072	1	2311	tags=33%, list=12%, signal=38%
GOBP_MANGANESE_ION_TRANSPORT	13	-0.327879	-0.758438	0.771072	0.949806	1	2311	tags=23%, list=12%, signal=26%
GOBP_MANNOSE_METABOLIC_PROCESS	11	-0.498906	-1.13278	0.295572	0.603559	1	4500	tags=55%, list=23%, signal=71%
GOBP_MAST_CELL_ACTIVATION	66	-0.385385	-1.26241	0.12039	0.488167	1	3144	tags=30%, list=16%, signal=36%
GOBP_MAST_CELL_ACTIVATION_INVOLVED_IN_IMMUNE_RESPONSE	48	-0.382468	-1.17405	0.205422	0.567274	1	3374	tags=33%, list=17%, signal=40%
GOBP_MAST_CELL_CHEMOTAXIS	12	-0.636194	-1.42822	0.0832455	0.362964	1	1700	tags=42%, list=9%, signal=46%
GOBP_MAST_CELL_DIFFERENTIATION	6	-0.334107	-0.639289	0.856996	0.982345	1	12914	tags=100%, list=67%, signal=299%
GOBP_MAST_CELL_MIGRATION	15	-0.513547	-1.23139	0.216387	0.518729	1	1700	tags=33%, list=9%, signal=37%
GOBP_MATURATION_OF_LSU_RRNA	30	-0.283433	-0.797464	0.768578	0.927925	1	2771	tags=20%, list=14%, signal=23%
GOBP_MATURATION_OF_SSU_RRNA	47	-0.364607	-1.12115	0.271399	0.615365	1	4166	tags=28%, list=21%, signal=35%
GOBP_MATURATION_OF_SSU_RRNA_FROM_TRICISTRONIC_RRNA_TRANSCRIPT_SSU_RRNA_5_8S_RRNA_LSU_RRNA	33	-0.391522	-1.11943	0.284797	0.616501	1	4166	tags=30%, list=21%, signal=39%
GOBP_MEDIUM_CHAIN_FATTY_ACID_BIOSYNTHETIC_PROCESS	5	-0.772396	-1.38876	0.118822	0.388897	1	2624	tags=60%, list=14%, signal=69%
GOBP_MEDIUM_CHAIN_FATTY_ACID_METABOLIC_PROCESS	10	-0.603046	-1.2878	0.188235	0.46405	1	689	tags=20%, list=4%, signal=21%
GOBP_MEIOTIC_CELL_CYCLE_CHECKPOINT_SIGNALING	6	-0.788622	-1.50814	0.0477707	0.30285	1	347	tags=17%, list=2%, signal=17%
GOBP_MEIOTIC_CELL_CYCLE_PHASE_TRANSITION	10	-0.50453	-1.08438	0.395253	0.653697	1	2263	tags=20%, list=12%, signal=23%
GOBP_MEIOTIC_CELL_CYCLE_PROCESS_INVOLVED_IN_OOCYTE_MATURATION	7	-0.346128	-0.686609	0.835257	0.974634	1	5778	tags=57%, list=30%, signal=81%
GOBP_MEIOTIC_CHROMOSOME_SEPARATION	9	-0.329412	-0.694244	0.816826	0.974221	1	13006	tags=100%, list=67%, signal=304%
GOBP_MEIOTIC_SPINDLE_ASSEMBLY	13	-0.288268	-0.662117	0.887368	0.979526	1	1424	tags=15%, list=7%, signal=17%
GOBP_MEIOTIC_SPINDLE_ORGANIZATION	21	-0.275235	-0.701893	0.881338	0.972827	1	1585	tags=14%, list=8%, signal=16%
GOBP_MELANOCYTE_DIFFERENTIATION	25	-0.509354	-1.36805	0.102591	0.400164	1	834	tags=20%, list=4%, signal=21%
GOBP_MELANOCYTE_PROLIFERATION	3	-0.603115	-0.982667	0.541754	0.758432	1	2938	tags=33%, list=15%, signal=39%
GOBP_MEMBRANE_DISASSEMBLY	6	-0.545092	-1.0502	0.435501	0.689349	1	131	tags=17%, list=1%, signal=17%
GOBP_MEMBRANE_HYPERPOLARIZATION	20	-0.368544	-0.946842	0.540154	0.802069	1	2125	tags=25%, list=11%, signal=28%
GOBP_MEMBRANE_INVAGINATION	67	-0.411977	-1.33757	0.0764398	0.425672	1	2951	tags=30%, list=15%, signal=35%
GOBP_MEMBRANE_LIPID_BIOSYNTHETIC_PROCESS	128	-0.445632	-1.61892	0.00216685	0.209179	1	2498	tags=25%, list=13%, signal=29%
GOBP_MEMBRANE_LIPID_CATABOLIC_PROCESS	30	-0.59935	-1.704	0.0106724	0.132973	1	2798	tags=33%, list=14%, signal=39%
GOBP_MEMBRANE_LIPID_METABOLIC_PROCESS	172	-0.490534	-1.83256	0	0.0488499	0.998	2798	tags=30%, list=14%, signal=34%
GOBP_MEMBRANE_PROTEIN_ECTODOMAIN_PROTEOLYSIS	39	-0.586321	-1.70359	0.00332963	0.133112	1	2963	tags=44%, list=15%, signal=51%
GOBP_MEMBRANE_PROTEIN_INTRACELLULAR_DOMAIN_PROTEOLYSIS	10	-0.374985	-0.823653	0.66596	0.909109	1	3217	tags=40%, list=17%, signal=48%
GOBP_MEMBRANE_PROTEIN_PROTEOLYSIS	51	-0.498694	-1.53891	0.0182992	0.272531	1	3217	tags=37%, list=17%, signal=45%
GOBP_MEMBRANE_RAFT_ASSEMBLY	8	-0.492934	-0.998115	0.478261	0.743563	1	4704	tags=63%, list=24%, signal=82%
GOBP_MEMBRANE_RAFT_LOCALIZATION	5	-0.83351	-1.53529	0.0345528	0.277983	1	207	tags=20%, list=1%, signal=20%
GOBP_MEMBRANE_RAFT_ORGANIZATION	21	-0.785081	-1.99949	0	0.00597351	0.289	430	tags=24%, list=2%, signal=24%
GOBP_MEMBRANE_REPOLARIZATION	42	-0.331047	-0.97286	0.486188	0.770116	1	1333	tags=17%, list=7%, signal=18%
GOBP_MEMBRANE_REPOLARIZATION_DURING_VENTRICULAR_CARDIAC_MUSCLE_CELL_ACTION_POTENTIAL	4	-0.750067	-1.30015	0.19392	0.453898	1	1333	tags=50%, list=7%, signal=54%
GOBP_MEMBRANOUS_SEPTUM_MORPHOGENESIS	10	-0.654426	-1.4265	0.0883576	0.362656	1	1896	tags=20%, list=10%, signal=22%
GOBP_MESENCHYMAL_CELL_APOPTOTIC_PROCESS	13	-0.27684	-0.633451	0.913774	0.982528	1	2869	tags=31%, list=15%, signal=36%
GOBP_MESENCHYMAL_CELL_DIFFERENTIATION	229	-0.279892	-1.09081	0.231884	0.645567	1	2200	tags=17%, list=11%, signal=18%
GOBP_MESENCHYMAL_CELL_MIGRATION	59	-0.504805	-1.60864	0.00753498	0.216811	1	2023	tags=25%, list=10%, signal=28%
GOBP_MESENCHYMAL_CELL_PROLIFERATION	52	-0.428993	-1.34291	0.0752351	0.42103	1	2044	tags=21%, list=11%, signal=24%
GOBP_MESENCHYMAL_CELL_PROLIFERATION_INVOLVED_IN_LUNG_DEVELOPMENT	6	-0.576123	-1.10296	0.371212	0.634267	1	2938	tags=50%, list=15%, signal=59%
GOBP_MESENCHYMAL_EPITHELIAL_CELL_SIGNALING	8	-0.606576	-1.24018	0.233405	0.509806	1	1323	tags=25%, list=7%, signal=27%
GOBP_MESENCHYMAL_STEM_CELL_DIFFERENTIATION	11	-0.563797	-1.26749	0.220145	0.48578	1	2395	tags=36%, list=12%, signal=41%
GOBP_MESENCHYMAL_STEM_CELL_MAINTENANCE_INVOLVED_IN_NEPHRON_MORPHOGENESIS	4	-0.62839	-1.0961	0.406091	0.64235	1	2869	tags=75%, list=15%, signal=88%
GOBP_MESENCHYMAL_STEM_CELL_PROLIFERATION	7	-0.828247	-1.64805	0.0138298	0.175154	1	3217	tags=71%, list=17%, signal=86%
GOBP_MESENCHYMAL_TO_EPITHELIAL_TRANSITION	13	-0.669002	-1.55912	0.0441335	0.262163	1	4040	tags=54%, list=21%, signal=68%
GOBP_MESENCHYMAL_TO_EPITHELIAL_TRANSITION_INVOLVED_IN_METANEPHROS_MORPHOGENESIS	8	-0.756374	-1.56356	0.0363071	0.257249	1	3555	tags=63%, list=18%, signal=77%
GOBP_MESENCHYME_DEVELOPMENT	276	-0.269683	-1.07351	0.246637	0.664609	1	2200	tags=17%, list=11%, signal=19%
GOBP_MESENCHYME_MORPHOGENESIS	53	-0.280858	-0.889346	0.670639	0.854766	1	3217	tags=23%, list=17%, signal=27%
GOBP_MESODERM_MORPHOGENESIS	55	-0.259907	-0.822532	0.766355	0.909656	1	2200	tags=15%, list=11%, signal=16%
GOBP_MESODERMAL_CELL_DIFFERENTIATION	14	-0.420989	-0.977159	0.484358	0.765558	1	1896	tags=21%, list=10%, signal=24%
GOBP_MESODERMAL_CELL_FATE_COMMITMENT	8	-0.496263	-1.03219	0.431144	0.706434	1	1896	tags=25%, list=10%, signal=28%
GOBP_MESODERMAL_CELL_FATE_SPECIFICATION	6	-0.41831	-0.815036	0.674587	0.91541	1	1038	tags=17%, list=5%, signal=18%
GOBP_MESONEPHRIC_DUCT_FORMATION	2	-0.852169	-1.28263	0.152929	0.470169	1	2869	tags=100%, list=15%, signal=117%
GOBP_MESONEPHRIC_TUBULE_FORMATION	8	-0.359659	-0.749703	0.779679	0.95475	1	2869	tags=38%, list=15%, signal=44%
GOBP_MESONEPHRIC_TUBULE_MORPHOGENESIS	62	-0.417914	-1.35656	0.0702341	0.407989	1	1990	tags=23%, list=10%, signal=25%
GOBP_MESONEPHROS_DEVELOPMENT	91	-0.359579	-1.23033	0.111708	0.519636	1	2149	tags=21%, list=11%, signal=23%
GOBP_METANEPHRIC_EPITHELIUM_DEVELOPMENT	19	-0.376621	-0.956804	0.515778	0.790257	1	4170	tags=53%, list=22%, signal=67%
GOBP_METANEPHRIC_GLOMERULUS_DEVELOPMENT	10	-0.288448	-0.627984	0.904198	0.982696	1	4669	tags=50%, list=24%, signal=66%
GOBP_METANEPHRIC_GLOMERULUS_VASCULATURE_DEVELOPMENT	6	-0.34358	-0.665641	0.839384	0.979126	1	1409	tags=33%, list=7%, signal=36%
GOBP_METANEPHRIC_NEPHRON_DEVELOPMENT	32	-0.490617	-1.39531	0.0784314	0.383374	1	4170	tags=50%, list=22%, signal=64%
GOBP_METANEPHRIC_NEPHRON_EPITHELIUM_DEVELOPMENT	16	-0.33716	-0.823129	0.71645	0.909332	1	4170	tags=50%, list=22%, signal=64%
GOBP_METANEPHRIC_NEPHRON_MORPHOGENESIS	18	-0.64828	-1.61656	0.0245464	0.210208	1	4040	tags=56%, list=21%, signal=70%
GOBP_METANEPHRIC_NEPHRON_TUBULE_EPITHELIAL_CELL_DIFFERENTIATION	4	-0.606551	-1.05089	0.442553	0.68862	1	7632	tags=100%, list=39%, signal=165%
GOBP_METANEPHRIC_NEPHRON_TUBULE_MORPHOGENESIS	5	-0.713898	-1.33117	0.161421	0.433621	1	961	tags=40%, list=5%, signal=42%
GOBP_METANEPHRIC_RENAL_VESICLE_MORPHOGENESIS	11	-0.633844	-1.41851	0.109359	0.369964	1	3555	tags=45%, list=18%, signal=56%
GOBP_METANEPHRIC_TUBULE_FORMATION	4	-0.72391	-1.26713	0.204569	0.485018	1	5357	tags=100%, list=28%, signal=138%
GOBP_METANEPHRIC_TUBULE_MORPHOGENESIS	7	-0.708596	-1.41434	0.0948367	0.370609	1	5656	tags=100%, list=29%, signal=141%
GOBP_METANEPHROS_DEVELOPMENT	73	-0.26991	-0.88789	0.670342	0.855985	1	1990	tags=18%, list=10%, signal=20%
GOBP_METANEPHROS_MORPHOGENESIS	23	-0.42113	-1.0924	0.347222	0.644603	1	4040	tags=43%, list=21%, signal=55%
GOBP_METAPHASE_ANAPHASE_TRANSITION_OF_MEIOTIC_CELL_CYCLE	4	-0.410369	-0.721247	0.795524	0.964567	1	11435	tags=100%, list=59%, signal=244%
GOBP_METAPHASE_CHROMOSOME_ALIGNMENT	89	-0.339382	-1.15612	0.190374	0.581621	1	3790	tags=25%, list=20%, signal=31%
GOBP_METHIONINE_METABOLIC_PROCESS	11	-0.457168	-1.02643	0.445483	0.712988	1	5338	tags=45%, list=28%, signal=63%
GOBP_METHYLGLYOXAL_CATABOLIC_PROCESS_TO_D_LACTATE_VIA_S_LACTOYL_GLUTATHIONE	5	-0.790099	-1.43846	0.0906314	0.358631	1	2293	tags=60%, list=12%, signal=68%
GOBP_METHYLGLYOXAL_METABOLIC_PROCESS	7	-0.727564	-1.44287	0.0859454	0.354337	1	2293	tags=57%, list=12%, signal=65%
GOBP_MHC_CLASS_I_BIOSYNTHETIC_PROCESS	4	-0.947226	-1.63932	0	0.186249	1	30	tags=25%, list=0%, signal=25%
GOBP_MHC_CLASS_II_BIOSYNTHETIC_PROCESS	12	-0.625372	-1.40315	0.10828	0.376649	1	1727	tags=25%, list=9%, signal=27%
GOBP_MICROGLIA_DEVELOPMENT	6	-0.817151	-1.57954	0.028481	0.242634	1	208	tags=17%, list=1%, signal=17%
GOBP_MICROGLIA_DIFFERENTIATION	15	-0.614118	-1.46473	0.0836048	0.342178	1	3666	tags=33%, list=19%, signal=41%
GOBP_MICROGLIAL_CELL_MEDIATED_CYTOTOXICITY	4	-0.535826	-0.939781	0.569516	0.810362	1	4114	tags=50%, list=21%, signal=63%
GOBP_MICROGLIAL_CELL_MIGRATION	7	-0.653362	-1.29487	0.200213	0.457545	1	2410	tags=71%, list=12%, signal=82%
GOBP_MICROGLIAL_CELL_PROLIFERATION	9	-0.66352	-1.40496	0.116136	0.375589	1	2000	tags=56%, list=10%, signal=62%
GOBP_MIDBODY_ABSCISSION	16	-0.398639	-0.974197	0.497792	0.769249	1	4590	tags=38%, list=24%, signal=49%
GOBP_MIDBRAIN_DEVELOPMENT	40	-0.449332	-1.32499	0.0980616	0.437051	1	2004	tags=28%, list=10%, signal=31%
GOBP_MIDBRAIN_DOPAMINERGIC_NEURON_DIFFERENTIATION	11	-0.438454	-0.968503	0.508696	0.774279	1	1500	tags=27%, list=8%, signal=30%
GOBP_MIDBRAIN_HINDBRAIN_BOUNDARY_DEVELOPMENT	6	-0.700951	-1.33211	0.164474	0.432465	1	2557	tags=50%, list=13%, signal=58%
GOBP_MIDDLE_EAR_MORPHOGENESIS	20	-0.33702	-0.857802	0.662447	0.883803	1	1964	tags=20%, list=10%, signal=22%
GOBP_MIDGUT_DEVELOPMENT	4	-0.855246	-1.46405	0.0536437	0.34236	1	838	tags=50%, list=4%, signal=52%
GOBP_MIGRACYTOSIS	6	-0.687635	-1.33735	0.161117	0.424926	1	421	tags=33%, list=2%, signal=34%
GOBP_MINERALOCORTICOID_BIOSYNTHETIC_PROCESS	9	-0.368625	-0.779866	0.712871	0.940486	1	4574	tags=44%, list=24%, signal=58%
GOBP_MINERALOCORTICOID_METABOLIC_PROCESS	12	-0.619148	-1.39567	0.11039	0.383125	1	2395	tags=33%, list=12%, signal=38%
GOBP_MINERALOCORTICOID_SECRETION	7	-0.66447	-1.30745	0.181159	0.44862	1	2198	tags=57%, list=11%, signal=64%
GOBP_MIRNA_CATABOLIC_PROCESS	12	-0.307047	-0.703215	0.847755	0.972721	1	701	tags=8%, list=4%, signal=9%
GOBP_MIRNA_MEDIATED_GENE_SILENCING_BY_INHIBITION_OF_TRANSLATION	17	-0.2311	-0.570456	0.966976	0.990163	1	4164	tags=29%, list=21%, signal=37%
GOBP_MITOCHONDRIAL_ATP_TRANSMEMBRANE_TRANSPORT	4	-0.529032	-0.924485	0.570386	0.825102	1	4364	tags=50%, list=23%, signal=65%
GOBP_MITOCHONDRIAL_CALCIUM_ION_TRANSMEMBRANE_TRANSPORT	18	-0.28729	-0.71136	0.834382	0.96917	1	4288	tags=39%, list=22%, signal=50%
GOBP_MITOCHONDRIAL_CYTOCHROME_C_OXIDASE_ASSEMBLY	20	-0.345734	-0.884377	0.623077	0.859507	1	5996	tags=50%, list=31%, signal=72%
GOBP_MITOCHONDRIAL_ELECTRON_TRANSPORT_CYTOCHROME_C_TO_OXYGEN	16	-0.78798	-1.93494	0	0.0138348	0.6875	3096	tags=75%, list=16%, signal=89%	oxidative phosphorylation
GOBP_MITOCHONDRIAL_ELECTRON_TRANSPORT_NADH_TO_UBIQUINONE	29	-0.635848	-1.77622	0.00434311	0.0790017	1	3909	tags=62%, list=20%, signal=78%
GOBP_MITOCHONDRIAL_ELECTRON_TRANSPORT_SUCCINATE_TO_UBIQUINONE	5	-0.609283	-1.11286	0.378205	0.622768	1	3808	tags=60%, list=20%, signal=75%
GOBP_MITOCHONDRIAL_ELECTRON_TRANSPORT_UBIQUINOL_TO_CYTOCHROME_C	12	-0.658959	-1.48554	0.0602007	0.323839	1	3878	tags=67%, list=20%, signal=83%
GOBP_MITOCHONDRIAL_GENE_EXPRESSION	166	-0.338331	-1.26061	0.0519481	0.489581	1	4533	tags=33%, list=23%, signal=43%
GOBP_MITOCHONDRIAL_MEMBRANE_ORGANIZATION	108	-0.240109	-0.84419	0.820287	0.892101	1	4033	tags=23%, list=21%, signal=29%
GOBP_MITOCHONDRIAL_PROTON_TRANSPORTING_ATP_SYNTHASE_COMPLEX_ASSEMBLY	7	-0.56486	-1.13608	0.339193	0.600272	1	4276	tags=57%, list=22%, signal=73%
GOBP_MITOCHONDRIAL_RESPIRASOME_ASSEMBLY	7	-0.684359	-1.35337	0.133874	0.411664	1	5434	tags=86%, list=28%, signal=119%
GOBP_MITOCHONDRIAL_RESPIRATORY_CHAIN_COMPLEX_ASSEMBLY	95	-0.489431	-1.70327	0.00320171	0.13219	1	4050	tags=41%, list=21%, signal=52%	oxidative phosphorylation
GOBP_MITOCHONDRIAL_RIBOSOME_ASSEMBLY	10	-0.357168	-0.776405	0.724479	0.941833	1	714	tags=10%, list=4%, signal=10%
GOBP_MITOCHONDRIAL_RNA_CATABOLIC_PROCESS	6	-0.363102	-0.697824	0.813084	0.974223	1	12352	tags=100%, list=64%, signal=275%
GOBP_MITOCHONDRIAL_TRANSCRIPTION	22	-0.226691	-0.591721	0.96	0.98823	1	4050	tags=23%, list=21%, signal=29%
GOBP_MITOCHONDRIAL_TRANSLATION	130	-0.381435	-1.37704	0.0272035	0.395363	1	5487	tags=44%, list=28%, signal=61%
GOBP_MITOCHONDRIAL_TRANSMEMBRANE_TRANSPORT	56	-0.377136	-1.2027	0.173961	0.54138	1	4050	tags=34%, list=21%, signal=43%
GOBP_MITOCHONDRION_DISTRIBUTION	24	-0.32479	-0.875109	0.631929	0.868735	1	2772	tags=33%, list=14%, signal=39%
GOBP_MITOCHONDRION_ENDOPLASMIC_RETICULUM_MEMBRANE_TETHERING	7	-0.550755	-1.09092	0.366771	0.645501	1	1924	tags=29%, list=10%, signal=32%
GOBP_MITOCHONDRION_MORPHOGENESIS	27	-0.374808	-1.02433	0.418527	0.715507	1	2720	tags=37%, list=14%, signal=43%
GOBP_MITOTIC_CELL_CYCLE_CHECKPOINT_SIGNALING	141	-0.277541	-1.01741	0.39957	0.721845	1	1424	tags=10%, list=7%, signal=11%
GOBP_MITOTIC_DNA_INTEGRITY_CHECKPOINT_SIGNALING	81	-0.246832	-0.836477	0.786566	0.899194	1	1370	tags=10%, list=7%, signal=11%
GOBP_MITOTIC_DNA_REPLICATION_CHECKPOINT_SIGNALING	8	-0.393896	-0.814274	0.696296	0.916157	1	347	tags=13%, list=2%, signal=13%
GOBP_MITOTIC_G1_S_TRANSITION_CHECKPOINT_SIGNALING	23	-0.426219	-1.13237	0.295699	0.60432	1	1158	tags=13%, list=6%, signal=14%
GOBP_MITOTIC_G2_DNA_DAMAGE_CHECKPOINT_SIGNALING	39	-0.261152	-0.763607	0.824786	0.94626	1	897	tags=10%, list=5%, signal=11%
GOBP_MITOTIC_G2_M_TRANSITION_CHECKPOINT	53	-0.265454	-0.823674	0.783494	0.909245	1	897	tags=9%, list=5%, signal=10%
GOBP_MITOTIC_INTRA_S_DNA_DAMAGE_CHECKPOINT_SIGNALING	15	-0.388646	-0.944827	0.528836	0.804352	1	1370	tags=13%, list=7%, signal=14%
GOBP_MITOTIC_METAPHASE_CHROMOSOME_ALIGNMENT	54	-0.344029	-1.07184	0.33223	0.666381	1	3790	tags=28%, list=20%, signal=34%
GOBP_MITOTIC_NUCLEAR_DIVISION	249	-0.227806	-0.888666	0.817486	0.855011	1	3810	tags=20%, list=20%, signal=25%
GOBP_MITOTIC_NUCLEAR_MEMBRANE_ORGANIZATION	5	-0.584368	-1.05528	0.43038	0.684567	1	2819	tags=60%, list=15%, signal=70%
GOBP_MITOTIC_RECOMBINATION	24	-0.258686	-0.697115	0.879291	0.974556	1	3497	tags=25%, list=18%, signal=30%
GOBP_MITOTIC_SISTER_CHROMATID_SEPARATION	58	-0.231202	-0.736142	0.898158	0.959858	1	3810	tags=17%, list=20%, signal=21%
GOBP_MITRAL_VALVE_DEVELOPMENT	14	-0.436656	-1.0259	0.434783	0.71316	1	248	tags=7%, list=1%, signal=7%
GOBP_MODIFIED_AMINO_ACID_TRANSPORT	38	-0.4181	-1.2466	0.170261	0.503642	1	4208	tags=32%, list=22%, signal=40%
GOBP_MODULATION_BY_SYMBIONT_OF_ENTRY_INTO_HOST	45	-0.392327	-1.18694	0.217907	0.554048	1	1654	tags=13%, list=9%, signal=15%
GOBP_MODULATION_OF_PROCESS_OF_ANOTHER_ORGANISM	12	-0.337931	-0.76356	0.768828	0.94615	1	5131	tags=33%, list=26%, signal=45%
GOBP_MOLTING_CYCLE	112	-0.326863	-1.15362	0.190424	0.584669	1	2066	tags=19%, list=11%, signal=21%
GOBP_MOLTING_CYCLE_PROCESS	100	-0.318039	-1.11277	0.254505	0.622585	1	2877	tags=24%, list=15%, signal=28%
GOBP_MONOACYLGLYCEROL_CATABOLIC_PROCESS	6	-0.48019	-0.924194	0.549634	0.825426	1	5354	tags=33%, list=28%, signal=46%
GOBP_MONOACYLGLYCEROL_METABOLIC_PROCESS	11	-0.272967	-0.605831	0.920719	0.987278	1	2891	tags=18%, list=15%, signal=21%
GOBP_MONOATOMIC_ANION_HOMEOSTASIS	20	-0.520252	-1.32664	0.135135	0.436477	1	2369	tags=45%, list=12%, signal=51%
GOBP_MONOCARBOXYLIC_ACID_BIOSYNTHETIC_PROCESS	172	-0.520728	-1.94925	0	0.0116694	0.59	3064	tags=37%, list=16%, signal=44%
GOBP_MONOCARBOXYLIC_ACID_CATABOLIC_PROCESS	116	-0.530686	-1.8935	0	0.0233417	0.9135	3293	tags=45%, list=17%, signal=54%
GOBP_MONOCARBOXYLIC_ACID_TRANSPORT	125	-0.340658	-1.23607	0.100317	0.513356	1	3981	tags=39%, list=21%, signal=49%
GOBP_MONOCYTE_CHEMOTACTIC_PROTEIN_1_PRODUCTION	20	-0.683542	-1.75048	0.00451977	0.0971276	1	1493	tags=20%, list=8%, signal=22%
GOBP_MONOCYTE_CHEMOTAXIS	38	-0.301389	-0.885444	0.658947	0.858978	1	403	tags=8%, list=2%, signal=8%
GOBP_MONOCYTE_DIFFERENTIATION	25	-0.367562	-0.98595	0.467085	0.755576	1	1896	tags=24%, list=10%, signal=27%
GOBP_MONOCYTE_EXTRAVASATION	9	-0.464424	-0.979473	0.490811	0.762167	1	917	tags=33%, list=5%, signal=35%
GOBP_MONOCYTE_HOMEOSTASIS	4	-0.58209	-1.00404	0.51227	0.73751	1	1070	tags=25%, list=6%, signal=26%
GOBP_MONONUCLEAR_CELL_DIFFERENTIATION	408	-0.23443	-0.965054	0.589773	0.778488	1	3488	tags=22%, list=18%, signal=26%
GOBP_MONONUCLEAR_CELL_MIGRATION	142	-0.276253	-1.00774	0.422954	0.734009	1	2564	tags=19%, list=13%, signal=22%
GOBP_MONOSACCHARIDE_BIOSYNTHETIC_PROCESS	89	-0.2587	-0.889062	0.674646	0.855031	1	3292	tags=26%, list=17%, signal=31%
GOBP_MONOSACCHARIDE_METABOLIC_PROCESS	242	-0.278741	-1.09106	0.224444	0.645537	1	3173	tags=22%, list=16%, signal=26%
GOBP_MORPHOGENESIS_OF_A_BRANCHING_STRUCTURE	216	-0.370386	-1.43295	0.00660793	0.361328	1	2174	tags=21%, list=11%, signal=23%
GOBP_MORPHOGENESIS_OF_AN_ENDOTHELIUM	19	-0.538107	-1.37799	0.120614	0.395071	1	3613	tags=42%, list=19%, signal=52%
GOBP_MORPHOGENESIS_OF_AN_EPITHELIAL_BUD	18	-0.444094	-1.12369	0.319215	0.612118	1	1990	tags=28%, list=10%, signal=31%
GOBP_MORPHOGENESIS_OF_AN_EPITHELIAL_FOLD	28	-0.4379	-1.20093	0.218783	0.542517	1	1990	tags=25%, list=10%, signal=28%
GOBP_MOTOR_BEHAVIOR	28	-0.474383	-1.29549	0.136723	0.457298	1	1767	tags=25%, list=9%, signal=27%
GOBP_MOTOR_NEURON_APOPTOTIC_PROCESS	26	-0.305987	-0.83919	0.693048	0.896426	1	2564	tags=31%, list=13%, signal=35%
GOBP_MOVEMENT_IN_HOST	99	-0.394187	-1.36913	0.0305677	0.399554	1	5030	tags=40%, list=26%, signal=54%
GOBP_MRNA_PSEUDOURIDINE_SYNTHESIS	9	-0.343544	-0.725962	0.78564	0.9633	1	5020	tags=44%, list=26%, signal=60%
GOBP_MUCUS_SECRETION	21	-0.492796	-1.26457	0.179266	0.486594	1	1159	tags=19%, list=6%, signal=20%
GOBP_MULTI_CILIATED_EPITHELIAL_CELL_DIFFERENTIATION	7	-0.425784	-0.857542	0.634304	0.883979	1	3358	tags=29%, list=17%, signal=35%
GOBP_MULTI_PASS_TRANSMEMBRANE_PROTEIN_INSERTION_INTO_ER_MEMBRANE	6	-0.683097	-1.31753	0.176282	0.441972	1	2620	tags=50%, list=14%, signal=58%
GOBP_MULTICELLULAR_ORGANISMAL_LEVEL_CHEMICAL_HOMEOSTASIS	61	-0.420846	-1.3576	0.0782609	0.407178	1	1534	tags=20%, list=8%, signal=21%
GOBP_MULTICELLULAR_ORGANISMAL_LEVEL_IRON_ION_HOMEOSTASIS	24	-0.268008	-0.706956	0.877944	0.972249	1	1534	tags=13%, list=8%, signal=14%
GOBP_MULTICELLULAR_ORGANISMAL_LEVEL_WATER_HOMEOSTASIS	19	-0.398192	-0.984753	0.468354	0.757017	1	1433	tags=21%, list=7%, signal=23%
GOBP_MULTINUCLEAR_OSTEOCLAST_DIFFERENTIATION	8	-0.580758	-1.19827	0.251068	0.541793	1	2038	tags=25%, list=11%, signal=28%
GOBP_MULTIVESICULAR_BODY_ORGANIZATION	14	-0.274069	-0.647598	0.899358	0.981766	1	3790	tags=29%, list=20%, signal=35%
GOBP_MULTIVESICULAR_BODY_SORTING_PATHWAY	34	-0.289639	-0.845698	0.720807	0.891004	1	3790	tags=24%, list=20%, signal=29%
GOBP_MUSCLE_ATROPHY	11	-0.651995	-1.45753	0.0737619	0.347393	1	1353	tags=27%, list=7%, signal=29%
GOBP_MUSCLE_CELL_CELLULAR_HOMEOSTASIS	24	-0.298868	-0.799585	0.750269	0.926665	1	3217	tags=38%, list=17%, signal=45%
GOBP_MUSCLE_CELL_DEVELOPMENT	199	-0.274337	-1.04472	0.343643	0.694448	1	2495	tags=16%, list=13%, signal=18%
GOBP_MUSCLE_CELL_DIFFERENTIATION	400	-0.26341	-1.08153	0.211124	0.65646	1	2547	tags=17%, list=13%, signal=19%
GOBP_MUSCLE_CELL_MIGRATION	124	-0.418359	-1.5016	0.00550661	0.31004	1	2586	tags=30%, list=13%, signal=34%
GOBP_MUSCLE_CELL_PROLIFERATION	247	-0.305753	-1.19979	0.0817884	0.542907	1	2527	tags=19%, list=13%, signal=22%
GOBP_MUSCLE_ORGAN_DEVELOPMENT	314	-0.30946	-1.25085	0.036215	0.499886	1	2527	tags=18%, list=13%, signal=20%
GOBP_MUSCLE_ORGAN_MORPHOGENESIS	73	-0.405427	-1.33923	0.0693391	0.425125	1	3339	tags=30%, list=17%, signal=36%
GOBP_MUSCLE_TISSUE_DEVELOPMENT	428	-0.268241	-1.10684	0.150794	0.630092	1	2419	tags=16%, list=12%, signal=18%
GOBP_MUSCULAR_SEPTUM_MORPHOGENESIS	6	-0.599543	-1.15207	0.341772	0.587329	1	2097	tags=33%, list=11%, signal=37%
GOBP_MYELIN_ASSEMBLY	26	-0.752479	-2.06607	0.00110865	0.00196465	0.08	1497	tags=31%, list=8%, signal=33%	glial differentiation
GOBP_MYELIN_MAINTENANCE	17	-0.663958	-1.66567	0.0209713	0.15909	1	885	tags=29%, list=5%, signal=31%	glial differentiation
GOBP_MYELOID_CELL_ACTIVATION_INVOLVED_IN_IMMUNE_RESPONSE	82	-0.389331	-1.32541	0.0654307	0.437091	1	3374	tags=29%, list=17%, signal=35%
GOBP_MYELOID_CELL_DEVELOPMENT	82	-0.327442	-1.10816	0.253813	0.628509	1	1977	tags=15%, list=10%, signal=16%
GOBP_MYELOID_CELL_DIFFERENTIATION	388	-0.317644	-1.31405	0.0131291	0.445882	1	2205	tags=16%, list=11%, signal=18%
GOBP_MYELOID_CELL_HOMEOSTASIS	182	-0.279359	-1.0581	0.327722	0.680583	1	3335	tags=22%, list=17%, signal=26%
GOBP_MYELOID_DENDRITIC_CELL_ACTIVATION	26	-0.324083	-0.888334	0.620155	0.855384	1	3682	tags=35%, list=19%, signal=43%
GOBP_MYELOID_DENDRITIC_CELL_CHEMOTAXIS	2	-0.560624	-0.825696	0.745158	0.907789	1	3591	tags=50%, list=19%, signal=61%
GOBP_MYELOID_DENDRITIC_CELL_CYTOKINE_PRODUCTION	6	-0.522342	-1.00429	0.470961	0.737467	1	439	tags=17%, list=2%, signal=17%
GOBP_MYELOID_DENDRITIC_CELL_DIFFERENTIATION	18	-0.373876	-0.944965	0.519027	0.804934	1	3682	tags=39%, list=19%, signal=48%
GOBP_MYELOID_LEUKOCYTE_ACTIVATION	202	-0.285407	-1.09545	0.232279	0.642559	1	3870	tags=28%, list=20%, signal=35%
GOBP_MYELOID_LEUKOCYTE_CYTOKINE_PRODUCTION	58	-0.505342	-1.6216	0.00746269	0.206135	1	2271	tags=22%, list=12%, signal=25%
GOBP_MYELOID_LEUKOCYTE_DIFFERENTIATION	214	-0.407405	-1.5696	0	0.250225	1	2149	tags=20%, list=11%, signal=22%
GOBP_MYELOID_LEUKOCYTE_MEDIATED_IMMUNITY	100	-0.361504	-1.27496	0.0814732	0.477903	1	5177	tags=44%, list=27%, signal=60%
GOBP_MYELOID_LEUKOCYTE_MIGRATION	184	-0.309897	-1.1844	0.127563	0.555024	1	2410	tags=20%, list=12%, signal=23%
GOBP_MYELOID_PROGENITOR_CELL_DIFFERENTIATION	14	-0.598221	-1.40438	0.102564	0.376655	1	1611	tags=29%, list=8%, signal=31%
GOBP_MYOBLAST_FATE_COMMITMENT	3	-0.777262	-1.26522	0.198	0.486678	1	4322	tags=100%, list=22%, signal=129%
GOBP_MYOBLAST_FUSION	37	-0.364801	-1.07382	0.344156	0.664816	1	2529	tags=30%, list=13%, signal=34%
GOBP_MYOBLAST_FUSION_INVOLVED_IN_SKELETAL_MUSCLE_REGENERATION	4	-0.923333	-1.58485	0.0109671	0.238681	1	414	tags=50%, list=2%, signal=51%
GOBP_MYOBLAST_MIGRATION	13	-0.566409	-1.30526	0.160944	0.449513	1	3555	tags=46%, list=18%, signal=56%
GOBP_MYOBLAST_PROLIFERATION	22	-0.33528	-0.882969	0.620985	0.861127	1	442	tags=9%, list=2%, signal=9%
GOBP_MYOTUBE_CELL_DEVELOPMENT	42	-0.363779	-1.0842	0.336853	0.653915	1	2	tags=2%, list=0%, signal=2%
GOBP_MYOTUBE_DIFFERENTIATION	119	-0.304988	-1.09141	0.264835	0.645463	1	2529	tags=19%, list=13%, signal=22%
GOBP_MYOTUBE_DIFFERENTIATION_INVOLVED_IN_SKELETAL_MUSCLE_REGENERATION	7	-0.676651	-1.37634	0.143948	0.394786	1	414	tags=29%, list=2%, signal=29%
GOBP_N_ACETYLNEURAMINATE_CATABOLIC_PROCESS	7	-0.673186	-1.33761	0.166497	0.425837	1	4537	tags=57%, list=23%, signal=75%
GOBP_N_ACYLETHANOLAMINE_METABOLIC_PROCESS	6	-0.665236	-1.27972	0.204357	0.472893	1	5991	tags=83%, list=31%, signal=121%
GOBP_N_ACYLPHOSPHATIDYLETHANOLAMINE_METABOLIC_PROCESS	6	-0.824346	-1.57015	0.0309278	0.250267	1	2993	tags=67%, list=15%, signal=79%
GOBP_N_TERMINAL_PROTEIN_LIPIDATION	7	-0.464445	-0.918433	0.57067	0.831217	1	1923	tags=43%, list=10%, signal=48%
GOBP_NAD_CATABOLIC_PROCESS	3	-0.558986	-0.909973	0.610601	0.837468	1	2565	tags=67%, list=13%, signal=77%
GOBP_NADH_DEHYDROGENASE_COMPLEX_ASSEMBLY	61	-0.609751	-1.9578	0	0.0108978	0.5325	4039	tags=52%, list=21%, signal=66%	oxidative phosphorylation
GOBP_NADP_CATABOLIC_PROCESS	5	-0.816119	-1.49857	0.054371	0.312612	1	2565	tags=60%, list=13%, signal=69%
GOBP_NADP_METABOLIC_PROCESS	48	-0.492345	-1.51452	0.0309735	0.294994	1	3302	tags=44%, list=17%, signal=53%
GOBP_NADPH_OXIDATION	9	-0.457898	-0.968468	0.505946	0.773818	1	3302	tags=44%, list=17%, signal=54%
GOBP_NADPH_REGENERATION	22	-0.511103	-1.31825	0.143634	0.441757	1	2330	tags=36%, list=12%, signal=41%
GOBP_NAIL_DEVELOPMENT	8	-0.807783	-1.66954	0.00978261	0.157431	1	2744	tags=50%, list=14%, signal=58%
GOBP_NATURAL_KILLER_CELL_ACTIVATION	73	-0.286376	-0.942351	0.534463	0.80661	1	4618	tags=37%, list=24%, signal=48%
GOBP_NATURAL_KILLER_CELL_ACTIVATION_INVOLVED_IN_IMMUNE_RESPONSE	9	-0.534918	-1.13954	0.33119	0.598038	1	114	tags=11%, list=1%, signal=11%
GOBP_NATURAL_KILLER_CELL_CYTOKINE_PRODUCTION	13	-0.70079	-1.62041	0.0262329	0.207616	1	5177	tags=92%, list=27%, signal=126%
GOBP_NATURAL_KILLER_CELL_DEGRANULATION	8	-0.545186	-1.11963	0.351351	0.617014	1	114	tags=13%, list=1%, signal=13%
GOBP_NATURAL_KILLER_CELL_MEDIATED_IMMUNE_RESPONSE_TO_TUMOR_CELL	6	-0.796575	-1.5292	0.0450734	0.282195	1	3217	tags=83%, list=17%, signal=100%
GOBP_NATURAL_KILLER_CELL_MEDIATED_IMMUNITY	57	-0.410774	-1.32167	0.0798687	0.439289	1	2305	tags=30%, list=12%, signal=34%
GOBP_NATURAL_KILLER_CELL_PROLIFERATION	23	-0.613869	-1.64631	0.0119695	0.177147	1	5177	tags=65%, list=27%, signal=89%
GOBP_NCRNA_PROCESSING	402	-0.181239	-0.744967	1	0.956684	1	4209	tags=21%, list=22%, signal=26%
GOBP_NECROPTOTIC_PROCESS	36	-0.299936	-0.866309	0.663542	0.876245	1	4704	tags=39%, list=24%, signal=51%
GOBP_NECROPTOTIC_SIGNALING_PATHWAY	7	-0.621246	-1.23231	0.262821	0.517682	1	4620	tags=86%, list=24%, signal=112%
GOBP_NEGATIVE_CHEMOTAXIS	41	-0.334457	-1.00064	0.462749	0.740542	1	2023	tags=20%, list=10%, signal=22%
GOBP_NEGATIVE_REGULATION_BY_HOST_OF_VIRAL_GENOME_REPLICATION	9	-0.270496	-0.568292	0.942888	0.990563	1	5433	tags=44%, list=28%, signal=62%
GOBP_NEGATIVE_REGULATION_BY_HOST_OF_VIRAL_PROCESS	12	-0.29669	-0.673284	0.874869	0.977338	1	6242	tags=50%, list=32%, signal=74%
GOBP_NEGATIVE_REGULATION_BY_HOST_OF_VIRAL_TRANSCRIPTION	12	-0.340854	-0.768487	0.772246	0.94481	1	2639	tags=25%, list=14%, signal=29%
GOBP_NEGATIVE_REGULATION_OF_ACTIN_FILAMENT_BUNDLE_ASSEMBLY	38	-0.387006	-1.12411	0.279335	0.6119	1	3223	tags=29%, list=17%, signal=35%
GOBP_NEGATIVE_REGULATION_OF_ACTION_POTENTIAL	10	-0.381009	-0.814252	0.691898	0.916023	1	234	tags=10%, list=1%, signal=10%
GOBP_NEGATIVE_REGULATION_OF_ACTIVATED_T_CELL_PROLIFERATION	11	-0.305418	-0.678378	0.871351	0.976752	1	2199	tags=18%, list=11%, signal=20%
GOBP_NEGATIVE_REGULATION_OF_ACTIVATION_INDUCED_CELL_DEATH_OF_T_CELLS	4	-0.849135	-1.45613	0.0584485	0.347916	1	2564	tags=75%, list=13%, signal=86%
GOBP_NEGATIVE_REGULATION_OF_ACTIVIN_RECEPTOR_SIGNALING_PATHWAY	14	-0.370365	-0.880671	0.617271	0.863732	1	1635	tags=21%, list=8%, signal=23%
GOBP_NEGATIVE_REGULATION_OF_ADAPTIVE_IMMUNE_RESPONSE	43	-0.368317	-1.11313	0.281915	0.622312	1	2358	tags=16%, list=12%, signal=18%
GOBP_NEGATIVE_REGULATION_OF_ALCOHOL_BIOSYNTHETIC_PROCESS	12	-0.474423	-1.08385	0.358272	0.65417	1	3148	tags=42%, list=16%, signal=50%
GOBP_NEGATIVE_REGULATION_OF_ALKALINE_PHOSPHATASE_ACTIVITY	4	-0.619231	-1.07785	0.432074	0.660937	1	200	tags=25%, list=1%, signal=25%
GOBP_NEGATIVE_REGULATION_OF_ALPHA_BETA_T_CELL_ACTIVATION	37	-0.500751	-1.48593	0.0363248	0.323297	1	3841	tags=32%, list=20%, signal=40%
GOBP_NEGATIVE_REGULATION_OF_ALPHA_BETA_T_CELL_DIFFERENTIATION	23	-0.57805	-1.54258	0.0354458	0.273282	1	3460	tags=30%, list=18%, signal=37%
GOBP_NEGATIVE_REGULATION_OF_ALPHA_BETA_T_CELL_PROLIFERATION	13	-0.627656	-1.45368	0.0815047	0.348487	1	827	tags=23%, list=4%, signal=24%
GOBP_NEGATIVE_REGULATION_OF_AMYLOID_BETA_CLEARANCE	7	-0.216677	-0.430759	0.984424	0.999069	1	6556	tags=57%, list=34%, signal=86%
GOBP_NEGATIVE_REGULATION_OF_AMYLOID_FIBRIL_FORMATION	12	-0.844023	-1.91975	0.00108578	0.0169479	0.785	2025	tags=83%, list=10%, signal=93%
GOBP_NEGATIVE_REGULATION_OF_AMYLOID_PRECURSOR_PROTEIN_BIOSYNTHETIC_PROCESS	7	-0.697914	-1.37305	0.124604	0.398034	1	2303	tags=71%, list=12%, signal=81%
GOBP_NEGATIVE_REGULATION_OF_AMYLOID_PRECURSOR_PROTEIN_CATABOLIC_PROCESS	20	-0.408432	-1.03168	0.430096	0.70674	1	484	tags=20%, list=2%, signal=20%
GOBP_NEGATIVE_REGULATION_OF_ANTIGEN_PROCESSING_AND_PRESENTATION	7	-0.48989	-0.983259	0.504722	0.757907	1	2831	tags=43%, list=15%, signal=50%
GOBP_NEGATIVE_REGULATION_OF_ANTIGEN_RECEPTOR_MEDIATED_SIGNALING_PATHWAY	24	-0.327512	-0.866075	0.658824	0.876033	1	3201	tags=25%, list=17%, signal=30%
GOBP_NEGATIVE_REGULATION_OF_APOPTOTIC_SIGNALING_PATHWAY	226	-0.250553	-0.975122	0.520501	0.767902	1	3129	tags=21%, list=16%, signal=25%
GOBP_NEGATIVE_REGULATION_OF_ASTROCYTE_DIFFERENTIATION	18	-0.368749	-0.920178	0.552095	0.830816	1	3836	tags=33%, list=20%, signal=42%
GOBP_NEGATIVE_REGULATION_OF_ATP_DEPENDENT_ACTIVITY	21	-0.482253	-1.24311	0.200215	0.506585	1	3486	tags=33%, list=18%, signal=41%
GOBP_NEGATIVE_REGULATION_OF_ATPASE_COUPLED_CALCIUM_TRANSMEMBRANE_TRANSPORTER_ACTIVITY	5	-0.687618	-1.26019	0.232558	0.490073	1	3486	tags=60%, list=18%, signal=73%
GOBP_NEGATIVE_REGULATION_OF_AUTOPHAGIC_CELL_DEATH	5	-0.706355	-1.31332	0.159529	0.446055	1	2199	tags=40%, list=11%, signal=45%
GOBP_NEGATIVE_REGULATION_OF_AUTOPHAGOSOME_ASSEMBLY	13	-0.27285	-0.624034	0.915418	0.98298	1	2720	tags=31%, list=14%, signal=36%
GOBP_NEGATIVE_REGULATION_OF_AUTOPHAGOSOME_MATURATION	5	-0.281521	-0.52043	0.967056	0.995781	1	13933	tags=100%, list=72%, signal=355%
GOBP_NEGATIVE_REGULATION_OF_AUTOPHAGY	75	-0.254517	-0.847547	0.752868	0.889894	1	3011	tags=21%, list=16%, signal=25%
GOBP_NEGATIVE_REGULATION_OF_AXON_EXTENSION	48	-0.39968	-1.22689	0.172113	0.522571	1	630	tags=13%, list=3%, signal=13%
GOBP_NEGATIVE_REGULATION_OF_AXON_EXTENSION_INVOLVED_IN_AXON_GUIDANCE	26	-0.537514	-1.45573	0.076841	0.34816	1	2023	tags=31%, list=10%, signal=34%
GOBP_NEGATIVE_REGULATION_OF_AXONOGENESIS	69	-0.431879	-1.40343	0.0473628	0.376878	1	690	tags=16%, list=4%, signal=16%
GOBP_NEGATIVE_REGULATION_OF_B_CELL_DIFFERENTIATION	6	-0.287321	-0.555045	0.936392	0.993124	1	1611	tags=17%, list=8%, signal=18%
GOBP_NEGATIVE_REGULATION_OF_BICELLULAR_TIGHT_JUNCTION_ASSEMBLY	5	-0.456348	-0.838832	0.655949	0.896388	1	1050	tags=40%, list=5%, signal=42%
GOBP_NEGATIVE_REGULATION_OF_BINDING	152	-0.265148	-0.978981	0.512849	0.762983	1	2924	tags=24%, list=15%, signal=28%
GOBP_NEGATIVE_REGULATION_OF_BIOMINERAL_TISSUE_DEVELOPMENT	19	-0.409833	-1.0217	0.424209	0.717774	1	3484	tags=47%, list=18%, signal=58%
GOBP_NEGATIVE_REGULATION_OF_BLOOD_CIRCULATION	24	-0.378312	-1.00871	0.429957	0.73275	1	323	tags=13%, list=2%, signal=13%
GOBP_NEGATIVE_REGULATION_OF_BLOOD_PRESSURE	56	-0.289944	-0.919441	0.60426	0.831431	1	3108	tags=27%, list=16%, signal=32%
GOBP_NEGATIVE_REGULATION_OF_BLOOD_VESSEL_ENDOTHELIAL_CELL_MIGRATION	33	-0.431053	-1.22708	0.180328	0.522792	1	3217	tags=36%, list=17%, signal=44%
GOBP_NEGATIVE_REGULATION_OF_BLOOD_VESSEL_ENDOTHELIAL_CELL_PROLIFERATION_INVOLVED_IN_SPROUTING_ANGIOGENESIS	6	-0.710699	-1.34708	0.156283	0.419943	1	2006	tags=67%, list=10%, signal=74%
GOBP_NEGATIVE_REGULATION_OF_BONE_REMODELING	15	-0.514237	-1.23447	0.216561	0.514643	1	2946	tags=47%, list=15%, signal=55%
GOBP_NEGATIVE_REGULATION_OF_BROWN_FAT_CELL_DIFFERENTIATION	5	-0.893019	-1.63958	0.0102881	0.186168	1	407	tags=40%, list=2%, signal=41%
GOBP_NEGATIVE_REGULATION_OF_CALCIUM_ION_DEPENDENT_EXOCYTOSIS	9	-0.425937	-0.907907	0.578947	0.839137	1	647	tags=22%, list=3%, signal=23%
GOBP_NEGATIVE_REGULATION_OF_CALCIUM_ION_IMPORT	6	-0.490733	-0.944963	0.522848	0.804756	1	567	tags=17%, list=3%, signal=17%
GOBP_NEGATIVE_REGULATION_OF_CALCIUM_ION_TRANSMEMBRANE_TRANSPORT_VIA_HIGH_VOLTAGE_GATED_CALCIUM_CHANNEL	5	-0.394701	-0.724807	0.772634	0.963229	1	234	tags=20%, list=1%, signal=20%
GOBP_NEGATIVE_REGULATION_OF_CALCIUM_ION_TRANSMEMBRANE_TRANSPORTER_ACTIVITY	32	-0.308101	-0.881518	0.633192	0.862996	1	3486	tags=28%, list=18%, signal=34%
GOBP_NEGATIVE_REGULATION_OF_CANONICAL_NF_KAPPAB_SIGNAL_TRANSDUCTION	47	-0.268792	-0.819262	0.774713	0.912551	1	2644	tags=19%, list=14%, signal=22%
GOBP_NEGATIVE_REGULATION_OF_CANONICAL_WNT_SIGNALING_PATHWAY	124	-0.37777	-1.36455	0.0264901	0.402415	1	3129	tags=27%, list=16%, signal=32%
GOBP_NEGATIVE_REGULATION_OF_CARDIAC_MUSCLE_CONTRACTION	4	-0.700638	-1.20132	0.28145	0.542046	1	2752	tags=50%, list=14%, signal=58%
GOBP_NEGATIVE_REGULATION_OF_CARDIOCYTE_DIFFERENTIATION	10	-0.429422	-0.933183	0.556263	0.817303	1	1322	tags=20%, list=7%, signal=21%
GOBP_NEGATIVE_REGULATION_OF_CARTILAGE_DEVELOPMENT	30	-0.421747	-1.18687	0.221498	0.553586	1	2378	tags=27%, list=12%, signal=30%
GOBP_NEGATIVE_REGULATION_OF_CATALYTIC_ACTIVITY	500	-0.248182	-1.03536	0.331435	0.70454	1	2216	tags=16%, list=11%, signal=17%
GOBP_NEGATIVE_REGULATION_OF_CD4_POSITIVE_ALPHA_BETA_T_CELL_ACTIVATION	28	-0.319807	-0.86382	0.650811	0.87817	1	3841	tags=25%, list=20%, signal=31%
GOBP_NEGATIVE_REGULATION_OF_CD4_POSITIVE_ALPHA_BETA_T_CELL_DIFFERENTIATION	18	-0.379435	-0.944217	0.522188	0.804895	1	3309	tags=22%, list=17%, signal=27%
GOBP_NEGATIVE_REGULATION_OF_CD4_POSITIVE_ALPHA_BETA_T_CELL_PROLIFERATION	10	-0.275754	-0.595374	0.917035	0.987766	1	3841	tags=30%, list=20%, signal=37%
GOBP_NEGATIVE_REGULATION_OF_CD8_POSITIVE_ALPHA_BETA_T_CELL_ACTIVATION	6	-0.812294	-1.56201	0.0295359	0.258593	1	2358	tags=67%, list=12%, signal=76%
GOBP_NEGATIVE_REGULATION_OF_CELL_ACTIVATION	182	-0.327386	-1.2391	0.0615711	0.510313	1	4756	tags=37%, list=25%, signal=48%
GOBP_NEGATIVE_REGULATION_OF_CELL_ADHESION	260	-0.351964	-1.39032	0.00456621	0.388432	1	2358	tags=18%, list=12%, signal=20%
GOBP_NEGATIVE_REGULATION_OF_CELL_ADHESION_MEDIATED_BY_INTEGRIN	10	-0.555585	-1.21117	0.242084	0.534622	1	2216	tags=40%, list=11%, signal=45%
GOBP_NEGATIVE_REGULATION_OF_CELL_ADHESION_MOLECULE_PRODUCTION	5	-0.607496	-1.09935	0.380798	0.639016	1	401	tags=20%, list=2%, signal=20%
GOBP_NEGATIVE_REGULATION_OF_CELL_CELL_ADHESION	164	-0.339486	-1.26725	0.0609244	0.485631	1	3460	tags=24%, list=18%, signal=29%
GOBP_NEGATIVE_REGULATION_OF_CELL_CELL_ADHESION_MEDIATED_BY_CADHERIN	8	-0.559715	-1.15906	0.312757	0.579163	1	4574	tags=63%, list=24%, signal=82%
GOBP_NEGATIVE_REGULATION_OF_CELL_CYCLE	352	-0.235303	-0.951522	0.613229	0.797927	1	2738	tags=16%, list=14%, signal=18%
GOBP_NEGATIVE_REGULATION_OF_CELL_CYCLE_CHECKPOINT	9	-0.573383	-1.20057	0.270724	0.542529	1	119	tags=11%, list=1%, signal=11%
GOBP_NEGATIVE_REGULATION_OF_CELL_CYCLE_G1_S_PHASE_TRANSITION	67	-0.381929	-1.26063	0.115108	0.489768	1	1164	tags=15%, list=6%, signal=16%
GOBP_NEGATIVE_REGULATION_OF_CELL_CYCLE_G2_M_PHASE_TRANSITION	65	-0.255851	-0.827549	0.793249	0.906577	1	3936	tags=26%, list=20%, signal=33%
GOBP_NEGATIVE_REGULATION_OF_CELL_CYCLE_PROCESS	281	-0.257432	-1.02863	0.345721	0.710028	1	2646	tags=15%, list=14%, signal=17%
GOBP_NEGATIVE_REGULATION_OF_CELL_DEVELOPMENT	276	-0.421964	-1.68151	0	0.147271	1	2149	tags=21%, list=11%, signal=23%
GOBP_NEGATIVE_REGULATION_OF_CELL_DIVISION	14	-0.315912	-0.742129	0.784418	0.95826	1	3345	tags=29%, list=17%, signal=35%
GOBP_NEGATIVE_REGULATION_OF_CELL_FATE_COMMITMENT	8	-0.825296	-1.72776	0.00921187	0.113977	1	567	tags=25%, list=3%, signal=26%
GOBP_NEGATIVE_REGULATION_OF_CELL_FATE_SPECIFICATION	2	-0.555011	-0.830076	0.73065	0.905033	1	8630	tags=100%, list=45%, signal=180%
GOBP_NEGATIVE_REGULATION_OF_CELL_KILLING	32	-0.42535	-1.20794	0.199566	0.535731	1	5278	tags=56%, list=27%, signal=77%
GOBP_NEGATIVE_REGULATION_OF_CELL_MATRIX_ADHESION	33	-0.504814	-1.43659	0.0572057	0.360705	1	1706	tags=18%, list=9%, signal=20%
GOBP_NEGATIVE_REGULATION_OF_CELL_MATURATION	10	-0.551758	-1.19543	0.257235	0.54489	1	2955	tags=40%, list=15%, signal=47%
GOBP_NEGATIVE_REGULATION_OF_CELL_MIGRATION_INVOLVED_IN_SPROUTING_ANGIOGENESIS	16	-0.358969	-0.873396	0.62878	0.870037	1	4385	tags=44%, list=23%, signal=56%
GOBP_NEGATIVE_REGULATION_OF_CELL_PROJECTION_ORGANIZATION	208	-0.431956	-1.66597	0	0.159044	1	1705	tags=19%, list=9%, signal=21%
GOBP_NEGATIVE_REGULATION_OF_CELL_SUBSTRATE_ADHESION	53	-0.431032	-1.35315	0.0746269	0.411657	1	1706	tags=15%, list=9%, signal=17%
GOBP_NEGATIVE_REGULATION_OF_CELL_SUBSTRATE_JUNCTION_ORGANIZATION	16	-0.554362	-1.35274	0.125934	0.411842	1	1394	tags=19%, list=7%, signal=20%
GOBP_NEGATIVE_REGULATION_OF_CELLULAR_CATABOLIC_PROCESS	175	-0.224522	-0.840122	0.859324	0.89575	1	2867	tags=15%, list=15%, signal=18%
GOBP_NEGATIVE_REGULATION_OF_CELLULAR_RESPONSE_TO_GROWTH_FACTOR_STIMULUS	92	-0.27535	-0.954276	0.544596	0.794371	1	2086	tags=16%, list=11%, signal=18%
GOBP_NEGATIVE_REGULATION_OF_CELLULAR_RESPONSE_TO_VASCULAR_ENDOTHELIAL_GROWTH_FACTOR_STIMULUS	12	-0.451874	-1.01384	0.456545	0.726624	1	1683	tags=25%, list=9%, signal=27%
GOBP_NEGATIVE_REGULATION_OF_CENTROSOME_DUPLICATION	11	-0.44289	-0.995446	0.46738	0.745603	1	2898	tags=45%, list=15%, signal=53%
GOBP_NEGATIVE_REGULATION_OF_CHEMOKINE_C_X_C_MOTIF_LIGAND_2_PRODUCTION	5	-0.711258	-1.31338	0.185787	0.446179	1	1493	tags=20%, list=8%, signal=22%
GOBP_NEGATIVE_REGULATION_OF_CHEMOKINE_MEDIATED_SIGNALING_PATHWAY	7	-0.517192	-1.03934	0.429325	0.69997	1	67	tags=14%, list=0%, signal=14%
GOBP_NEGATIVE_REGULATION_OF_CHEMOKINE_PRODUCTION	23	-0.684607	-1.80962	0.00106045	0.0582845	1	1493	tags=26%, list=8%, signal=28%
GOBP_NEGATIVE_REGULATION_OF_CHEMOTAXIS	53	-0.450295	-1.41889	0.0384615	0.369385	1	1582	tags=23%, list=8%, signal=25%
GOBP_NEGATIVE_REGULATION_OF_CHOLESTEROL_BIOSYNTHETIC_PROCESS	4	-0.521885	-0.905231	0.603538	0.841268	1	2878	tags=50%, list=15%, signal=59%
GOBP_NEGATIVE_REGULATION_OF_CHOLESTEROL_EFFLUX	6	-0.637275	-1.22779	0.257754	0.522038	1	1990	tags=50%, list=10%, signal=56%
GOBP_NEGATIVE_REGULATION_OF_CHOLESTEROL_STORAGE	9	-0.597256	-1.31087	0.179058	0.445422	1	2375	tags=33%, list=12%, signal=38%
GOBP_NEGATIVE_REGULATION_OF_CHONDROCYTE_DIFFERENTIATION	24	-0.519984	-1.37821	0.111349	0.394825	1	1984	tags=21%, list=10%, signal=23%
GOBP_NEGATIVE_REGULATION_OF_CILIUM_ASSEMBLY	20	-0.544597	-1.37653	0.111708	0.395431	1	2977	tags=30%, list=15%, signal=35%
GOBP_NEGATIVE_REGULATION_OF_CLATHRIN_DEPENDENT_ENDOCYTOSIS	5	-0.737545	-1.34487	0.140197	0.419585	1	1577	tags=60%, list=8%, signal=65%
GOBP_NEGATIVE_REGULATION_OF_COAGULATION	34	-0.591733	-1.69734	0.00984683	0.13684	1	2056	tags=35%, list=11%, signal=39%
GOBP_NEGATIVE_REGULATION_OF_COLD_INDUCED_THERMOGENESIS	43	-0.390683	-1.17779	0.214211	0.562597	1	2140	tags=21%, list=11%, signal=23%
GOBP_NEGATIVE_REGULATION_OF_COLLAGEN_METABOLIC_PROCESS	16	-0.720524	-1.77645	0.00961539	0.0796468	1	2586	tags=44%, list=13%, signal=50%
GOBP_NEGATIVE_REGULATION_OF_COMPLEMENT_ACTIVATION	12	-0.422021	-0.961817	0.504702	0.783404	1	780	tags=17%, list=4%, signal=17%
GOBP_NEGATIVE_REGULATION_OF_COMPLEMENT_DEPENDENT_CYTOTOXICITY	3	-0.548953	-0.876669	0.651805	0.867246	1	8748	tags=100%, list=45%, signal=182%
GOBP_NEGATIVE_REGULATION_OF_CYCLIN_DEPENDENT_PROTEIN_KINASE_ACTIVITY	26	-0.448769	-1.19241	0.240043	0.547918	1	3308	tags=38%, list=17%, signal=46%
GOBP_NEGATIVE_REGULATION_OF_CYSTEINE_TYPE_ENDOPEPTIDASE_ACTIVITY_INVOLVED_IN_APOPTOTIC_SIGNALING_PATHWAY	6	-0.411696	-0.787475	0.722222	0.936507	1	3021	tags=33%, list=16%, signal=39%
GOBP_NEGATIVE_REGULATION_OF_CYTOKINE_PRODUCTION	247	-0.385226	-1.51166	0.00109409	0.298228	1	3405	tags=25%, list=18%, signal=30%
GOBP_NEGATIVE_REGULATION_OF_CYTOKINE_PRODUCTION_INVOLVED_IN_IMMUNE_RESPONSE	25	-0.452887	-1.23118	0.197425	0.518304	1	5017	tags=48%, list=26%, signal=65%
GOBP_NEGATIVE_REGULATION_OF_CYTOKINE_PRODUCTION_INVOLVED_IN_INFLAMMATORY_RESPONSE	20	-0.577654	-1.48007	0.0597826	0.328006	1	2000	tags=30%, list=10%, signal=33%
GOBP_NEGATIVE_REGULATION_OF_CYTOKINESIS	6	-0.574317	-1.09985	0.378099	0.638213	1	2859	tags=33%, list=15%, signal=39%
GOBP_NEGATIVE_REGULATION_OF_DEFENSE_RESPONSE	235	-0.237754	-0.931504	0.667749	0.817999	1	3217	tags=21%, list=17%, signal=25%
GOBP_NEGATIVE_REGULATION_OF_DEFENSE_RESPONSE_TO_VIRUS	46	-0.308433	-0.937236	0.548212	0.813322	1	2660	tags=22%, list=14%, signal=25%
GOBP_NEGATIVE_REGULATION_OF_DENDRITIC_SPINE_MAINTENANCE	6	-0.56687	-1.09312	0.393651	0.64424	1	405	tags=17%, list=2%, signal=17%
GOBP_NEGATIVE_REGULATION_OF_DNA_BINDING	44	-0.337371	-1.01478	0.416667	0.72565	1	2924	tags=27%, list=15%, signal=32%
GOBP_NEGATIVE_REGULATION_OF_DNA_BINDING_TRANSCRIPTION_FACTOR_ACTIVITY	148	-0.298447	-1.09609	0.243876	0.642167	1	2328	tags=18%, list=12%, signal=20%
GOBP_NEGATIVE_REGULATION_OF_DNA_DAMAGE_RESPONSE_SIGNAL_TRANSDUCTION_BY_P53_CLASS_MEDIATOR	15	-0.535535	-1.28604	0.165746	0.465322	1	2947	tags=40%, list=15%, signal=47%
GOBP_NEGATIVE_REGULATION_OF_DNA_TEMPLATED_DNA_REPLICATION	6	-0.298978	-0.572521	0.922432	0.989792	1	2519	tags=17%, list=13%, signal=19%
GOBP_NEGATIVE_REGULATION_OF_DNA_TEMPLATED_TRANSCRIPTION_INITIATION	7	-0.501406	-0.995872	0.484783	0.745509	1	2097	tags=29%, list=11%, signal=32%
GOBP_NEGATIVE_REGULATION_OF_ENDOCYTOSIS	67	-0.310732	-1.01107	0.432018	0.731152	1	3217	tags=25%, list=17%, signal=30%
GOBP_NEGATIVE_REGULATION_OF_ENDOPEPTIDASE_ACTIVITY	105	-0.344771	-1.2138	0.136986	0.531746	1	1308	tags=16%, list=7%, signal=17%
GOBP_NEGATIVE_REGULATION_OF_ENDOPLASMIC_RETICULUM_CALCIUM_ION_CONCENTRATION	9	-0.319248	-0.669749	0.857143	0.97803	1	4522	tags=56%, list=23%, signal=72%
GOBP_NEGATIVE_REGULATION_OF_ENDOPLASMIC_RETICULUM_STRESS_INDUCED_INTRINSIC_APOPTOTIC_SIGNALING_PATHWAY	18	-0.308555	-0.768887	0.774054	0.945116	1	2125	tags=22%, list=11%, signal=25%
GOBP_NEGATIVE_REGULATION_OF_ENDOPLASMIC_RETICULUM_UNFOLDED_PROTEIN_RESPONSE	13	-0.447489	-1.0446	0.402748	0.694366	1	1727	tags=23%, list=9%, signal=25%
GOBP_NEGATIVE_REGULATION_OF_ENDOTHELIAL_CELL_APOPTOTIC_PROCESS	25	-0.415948	-1.12484	0.288542	0.61195	1	1507	tags=24%, list=8%, signal=26%
GOBP_NEGATIVE_REGULATION_OF_ENDOTHELIAL_CELL_DIFFERENTIATION	11	-0.417933	-0.922921	0.548596	0.827862	1	1215	tags=18%, list=6%, signal=19%
GOBP_NEGATIVE_REGULATION_OF_ENDOTHELIAL_CELL_MIGRATION	50	-0.453548	-1.40261	0.0560847	0.37644	1	3217	tags=32%, list=17%, signal=38%
GOBP_NEGATIVE_REGULATION_OF_ENDOTHELIAL_CELL_PROLIFERATION	40	-0.430397	-1.28755	0.124733	0.463929	1	2086	tags=28%, list=11%, signal=31%
GOBP_NEGATIVE_REGULATION_OF_EPIDERMIS_DEVELOPMENT	13	-0.472121	-1.09334	0.334783	0.644108	1	4961	tags=54%, list=26%, signal=72%
GOBP_NEGATIVE_REGULATION_OF_EPITHELIAL_CELL_DIFFERENTIATION	49	-0.319132	-0.984597	0.473797	0.756651	1	1215	tags=16%, list=6%, signal=17%
GOBP_NEGATIVE_REGULATION_OF_EPITHELIAL_CELL_DIFFERENTIATION_INVOLVED_IN_KIDNEY_DEVELOPMENT	5	-0.576275	-1.06098	0.419727	0.677172	1	834	tags=40%, list=4%, signal=42%
GOBP_NEGATIVE_REGULATION_OF_EPITHELIAL_CELL_MIGRATION	65	-0.404516	-1.31763	0.0853789	0.441976	1	3217	tags=26%, list=17%, signal=31%
GOBP_NEGATIVE_REGULATION_OF_EPITHELIAL_CELL_PROLIFERATION	146	-0.337232	-1.24528	0.0825295	0.504677	1	2524	tags=24%, list=13%, signal=27%
GOBP_NEGATIVE_REGULATION_OF_EPITHELIAL_CELL_PROLIFERATION_INVOLVED_IN_PROSTATE_GLAND_DEVELOPMENT	7	-0.663752	-1.29129	0.175836	0.461347	1	2515	tags=43%, list=13%, signal=49%
GOBP_NEGATIVE_REGULATION_OF_ERAD_PATHWAY	6	-0.428579	-0.819551	0.682523	0.912223	1	3517	tags=50%, list=18%, signal=61%
GOBP_NEGATIVE_REGULATION_OF_ERYTHROCYTE_DIFFERENTIATION	11	-0.280345	-0.626047	0.913462	0.98258	1	6159	tags=55%, list=32%, signal=80%
GOBP_NEGATIVE_REGULATION_OF_EXECUTION_PHASE_OF_APOPTOSIS	8	-0.366825	-0.756524	0.754367	0.950737	1	360	tags=13%, list=2%, signal=13%
GOBP_NEGATIVE_REGULATION_OF_EXOCYTOSIS	35	-0.289265	-0.834283	0.725026	0.901445	1	838	tags=11%, list=4%, signal=12%
GOBP_NEGATIVE_REGULATION_OF_EXTRACELLULAR_MATRIX_ORGANIZATION	10	-0.623219	-1.34557	0.153209	0.420552	1	1557	tags=30%, list=8%, signal=33%
GOBP_NEGATIVE_REGULATION_OF_EXTRINSIC_APOPTOTIC_SIGNALING_PATHWAY	85	-0.268853	-0.912203	0.644178	0.834546	1	3370	tags=22%, list=17%, signal=27%
GOBP_NEGATIVE_REGULATION_OF_EXTRINSIC_APOPTOTIC_SIGNALING_PATHWAY_VIA_DEATH_DOMAIN_RECEPTORS	25	-0.41357	-1.10742	0.326861	0.629291	1	837	tags=16%, list=4%, signal=17%
GOBP_NEGATIVE_REGULATION_OF_FAT_CELL_DIFFERENTIATION	54	-0.414846	-1.30274	0.110063	0.451526	1	1559	tags=17%, list=8%, signal=18%
GOBP_NEGATIVE_REGULATION_OF_FAT_CELL_PROLIFERATION	6	-0.366005	-0.695154	0.826862	0.97436	1	2000	tags=33%, list=10%, signal=37%
GOBP_NEGATIVE_REGULATION_OF_FATTY_ACID_BETA_OXIDATION	7	-0.362976	-0.717062	0.778356	0.966457	1	467	tags=14%, list=2%, signal=15%
GOBP_NEGATIVE_REGULATION_OF_FATTY_ACID_BIOSYNTHETIC_PROCESS	18	-0.317557	-0.7877	0.771585	0.936688	1	2279	tags=22%, list=12%, signal=25%
GOBP_NEGATIVE_REGULATION_OF_FATTY_ACID_METABOLIC_PROCESS	32	-0.303839	-0.854145	0.70706	0.885943	1	2279	tags=22%, list=12%, signal=25%
GOBP_NEGATIVE_REGULATION_OF_FATTY_ACID_OXIDATION	15	-0.38352	-0.912292	0.572181	0.835257	1	961	tags=20%, list=5%, signal=21%
GOBP_NEGATIVE_REGULATION_OF_FIBRINOLYSIS	7	-0.489821	-0.993338	0.475532	0.748322	1	3013	tags=43%, list=16%, signal=51%
GOBP_NEGATIVE_REGULATION_OF_FIBROBLAST_GROWTH_FACTOR_PRODUCTION	5	-0.463569	-0.840424	0.677744	0.895362	1	5278	tags=60%, list=27%, signal=82%
GOBP_NEGATIVE_REGULATION_OF_FIBROBLAST_GROWTH_FACTOR_RECEPTOR_SIGNALING_PATHWAY	17	-0.393713	-0.968342	0.473628	0.773766	1	315	tags=12%, list=2%, signal=12%
GOBP_NEGATIVE_REGULATION_OF_FIBROBLAST_MIGRATION	11	-0.525742	-1.14172	0.297325	0.594837	1	5016	tags=64%, list=26%, signal=86%
GOBP_NEGATIVE_REGULATION_OF_FIBROBLAST_PROLIFERATION	43	-0.335673	-1.00506	0.431818	0.736845	1	4704	tags=40%, list=24%, signal=52%
GOBP_NEGATIVE_REGULATION_OF_GASTRIC_ACID_SECRETION	2	-0.799041	-1.19123	0.278739	0.54984	1	3899	tags=100%, list=20%, signal=125%
GOBP_NEGATIVE_REGULATION_OF_GLIAL_CELL_DIFFERENTIATION	34	-0.465111	-1.32227	0.122942	0.43987	1	750	tags=18%, list=4%, signal=18%
GOBP_NEGATIVE_REGULATION_OF_GLIAL_CELL_MIGRATION	7	-0.856749	-1.68275	0.00720906	0.147114	1	166	tags=29%, list=1%, signal=29%
GOBP_NEGATIVE_REGULATION_OF_GLIAL_CELL_PROLIFERATION	23	-0.633546	-1.66994	0.00842993	0.157673	1	1164	tags=17%, list=6%, signal=18%
GOBP_NEGATIVE_REGULATION_OF_GLIOGENESIS	54	-0.494529	-1.54437	0.0114108	0.274143	1	1164	tags=17%, list=6%, signal=18%
GOBP_NEGATIVE_REGULATION_OF_GLOMERULAR_FILTRATION	5	-0.468423	-0.87399	0.596566	0.869847	1	516	tags=20%, list=3%, signal=21%
GOBP_NEGATIVE_REGULATION_OF_GLUCOSE_IMPORT	17	-0.386467	-0.952381	0.511317	0.797305	1	1544	tags=29%, list=8%, signal=32%
GOBP_NEGATIVE_REGULATION_OF_GLYCOGEN_BIOSYNTHETIC_PROCESS	6	-0.464008	-0.897393	0.604317	0.847377	1	2682	tags=33%, list=14%, signal=39%
GOBP_NEGATIVE_REGULATION_OF_GLYCOGEN_METABOLIC_PROCESS	7	-0.423467	-0.844139	0.634756	0.892027	1	2682	tags=29%, list=14%, signal=33%
GOBP_NEGATIVE_REGULATION_OF_GLYCOLYTIC_PROCESS	20	-0.258384	-0.669518	0.904198	0.978048	1	3011	tags=20%, list=16%, signal=24%
GOBP_NEGATIVE_REGULATION_OF_GLYCOPROTEIN_BIOSYNTHETIC_PROCESS	12	-0.439492	-0.985739	0.476242	0.755904	1	2303	tags=42%, list=12%, signal=47%
GOBP_NEGATIVE_REGULATION_OF_GLYCOPROTEIN_METABOLIC_PROCESS	14	-0.416325	-0.984466	0.466149	0.756589	1	2303	tags=36%, list=12%, signal=40%
GOBP_NEGATIVE_REGULATION_OF_GOLGI_TO_PLASMA_MEMBRANE_PROTEIN_TRANSPORT	4	-0.809818	-1.41415	0.0907173	0.370147	1	2630	tags=75%, list=14%, signal=87%
GOBP_NEGATIVE_REGULATION_OF_GONADOTROPIN_SECRETION	5	-0.424561	-0.787988	0.705696	0.936604	1	1141	tags=20%, list=6%, signal=21%
GOBP_NEGATIVE_REGULATION_OF_GRANULOCYTE_DIFFERENTIATION	9	-0.342569	-0.727465	0.787815	0.962814	1	2149	tags=33%, list=11%, signal=37%
GOBP_NEGATIVE_REGULATION_OF_GROWTH	234	-0.25611	-1.00255	0.438312	0.738522	1	2375	tags=17%, list=12%, signal=19%
GOBP_NEGATIVE_REGULATION_OF_GTPASE_ACTIVITY	30	-0.405372	-1.14929	0.251087	0.588848	1	1377	tags=20%, list=7%, signal=21%
GOBP_NEGATIVE_REGULATION_OF_GUANYL_NUCLEOTIDE_EXCHANGE_FACTOR_ACTIVITY	8	-0.564323	-1.17409	0.282378	0.567587	1	2621	tags=38%, list=14%, signal=43%
GOBP_NEGATIVE_REGULATION_OF_HAIR_FOLLICLE_DEVELOPMENT	4	-0.718603	-1.25646	0.236082	0.494161	1	315	tags=25%, list=2%, signal=25%
GOBP_NEGATIVE_REGULATION_OF_HEMATOPOIETIC_PROGENITOR_CELL_DIFFERENTIATION	13	-0.651301	-1.49964	0.0635593	0.311241	1	2892	tags=46%, list=15%, signal=54%
GOBP_NEGATIVE_REGULATION_OF_HEMATOPOIETIC_STEM_CELL_DIFFERENTIATION	5	-0.694032	-1.27908	0.186192	0.473918	1	2892	tags=60%, list=15%, signal=71%
GOBP_NEGATIVE_REGULATION_OF_HEMOPOIESIS	97	-0.500549	-1.73693	0.00213675	0.108629	1	3468	tags=31%, list=18%, signal=37%
GOBP_NEGATIVE_REGULATION_OF_HEPATOCYTE_PROLIFERATION	5	-0.79318	-1.45189	0.0797927	0.350357	1	4015	tags=100%, list=21%, signal=126%
GOBP_NEGATIVE_REGULATION_OF_HEXOKINASE_ACTIVITY	3	-0.372692	-0.607758	0.886735	0.986919	1	12165	tags=100%, list=63%, signal=268%
GOBP_NEGATIVE_REGULATION_OF_HOMOTYPIC_CELL_CELL_ADHESION	15	-0.433007	-1.03122	0.429022	0.707088	1	2081	tags=40%, list=11%, signal=45%
GOBP_NEGATIVE_REGULATION_OF_HORMONE_METABOLIC_PROCESS	13	-0.361836	-0.843028	0.660914	0.89307	1	4281	tags=54%, list=22%, signal=69%
GOBP_NEGATIVE_REGULATION_OF_HUMORAL_IMMUNE_RESPONSE	15	-0.37595	-0.91539	0.551867	0.832812	1	2795	tags=27%, list=14%, signal=31%
GOBP_NEGATIVE_REGULATION_OF_HUMORAL_IMMUNE_RESPONSE_MEDIATED_BY_CIRCULATING_IMMUNOGLOBULIN	9	-0.33981	-0.713708	0.808081	0.967757	1	2795	tags=33%, list=14%, signal=39%
GOBP_NEGATIVE_REGULATION_OF_HYDROGEN_PEROXIDE_MEDIATED_PROGRAMMED_CELL_DEATH	8	-0.755785	-1.54921	0.0423913	0.271138	1	2849	tags=50%, list=15%, signal=59%
GOBP_NEGATIVE_REGULATION_OF_HYDROLASE_ACTIVITY	230	-0.284013	-1.11402	0.186712	0.622536	1	1472	tags=14%, list=8%, signal=15%
GOBP_NEGATIVE_REGULATION_OF_IMMATURE_T_CELL_PROLIFERATION	5	-0.371123	-0.676198	0.827835	0.977262	1	3038	tags=40%, list=16%, signal=47%
GOBP_NEGATIVE_REGULATION_OF_IMMUNE_EFFECTOR_PROCESS	113	-0.339902	-1.20037	0.136714	0.542785	1	4903	tags=41%, list=25%, signal=54%
GOBP_NEGATIVE_REGULATION_OF_IMMUNE_RESPONSE	167	-0.242501	-0.912515	0.694289	0.835117	1	4030	tags=23%, list=21%, signal=29%
GOBP_NEGATIVE_REGULATION_OF_IMMUNE_SYSTEM_PROCESS	430	-0.305537	-1.2705	0.0126147	0.482948	1	3488	tags=23%, list=18%, signal=27%
GOBP_NEGATIVE_REGULATION_OF_IMMUNOGLOBULIN_PRODUCTION	10	-0.750031	-1.63777	0.0296378	0.187353	1	422	tags=20%, list=2%, signal=20%
GOBP_NEGATIVE_REGULATION_OF_INCLUSION_BODY_ASSEMBLY	8	-0.573423	-1.16468	0.303797	0.574856	1	270	tags=13%, list=1%, signal=13%
GOBP_NEGATIVE_REGULATION_OF_INFLAMMASOME_MEDIATED_SIGNALING_PATHWAY	14	-0.403914	-0.956502	0.507216	0.79043	1	2660	tags=29%, list=14%, signal=33%
GOBP_NEGATIVE_REGULATION_OF_INFLAMMATORY_RESPONSE	126	-0.262817	-0.948549	0.58686	0.800133	1	3148	tags=22%, list=16%, signal=26%
GOBP_NEGATIVE_REGULATION_OF_INFLAMMATORY_RESPONSE_TO_ANTIGENIC_STIMULUS	15	-0.397744	-0.958025	0.503247	0.788034	1	2795	tags=27%, list=14%, signal=31%
GOBP_NEGATIVE_REGULATION_OF_INNER_EAR_AUDITORY_RECEPTOR_CELL_DIFFERENTIATION	5	-0.772667	-1.41126	0.102592	0.373509	1	4385	tags=80%, list=23%, signal=103%
GOBP_NEGATIVE_REGULATION_OF_INSULIN_LIKE_GROWTH_FACTOR_RECEPTOR_SIGNALING_PATHWAY	8	-0.883272	-1.8335	0.00106838	0.0485675	0.998	172	tags=13%, list=1%, signal=13%
GOBP_NEGATIVE_REGULATION_OF_INTERLEUKIN_1_BETA_PRODUCTION	24	-0.540057	-1.4478	0.0703746	0.351606	1	2862	tags=25%, list=15%, signal=29%
GOBP_NEGATIVE_REGULATION_OF_INTERLEUKIN_1_PRODUCTION	30	-0.535067	-1.46531	0.0450549	0.341489	1	2862	tags=30%, list=15%, signal=35%
GOBP_NEGATIVE_REGULATION_OF_INTERLEUKIN_10_PRODUCTION	15	-0.539094	-1.26713	0.180435	0.485228	1	4618	tags=40%, list=24%, signal=52%
GOBP_NEGATIVE_REGULATION_OF_INTERLEUKIN_13_PRODUCTION	4	-0.661686	-1.13756	0.35124	0.599751	1	435	tags=25%, list=2%, signal=26%
GOBP_NEGATIVE_REGULATION_OF_INTERLEUKIN_17_PRODUCTION	14	-0.246009	-0.580873	0.952582	0.98875	1	3217	tags=29%, list=17%, signal=34%
GOBP_NEGATIVE_REGULATION_OF_INTERLEUKIN_2_PRODUCTION	19	-0.319482	-0.813356	0.719832	0.917005	1	2648	tags=32%, list=14%, signal=37%
GOBP_NEGATIVE_REGULATION_OF_INTERLEUKIN_4_PRODUCTION	5	-0.681916	-1.25641	0.215354	0.494055	1	1559	tags=40%, list=8%, signal=43%
GOBP_NEGATIVE_REGULATION_OF_INTERLEUKIN_5_PRODUCTION	4	-0.754207	-1.29794	0.179775	0.456582	1	435	tags=25%, list=2%, signal=26%
GOBP_NEGATIVE_REGULATION_OF_INTERLEUKIN_6_PRODUCTION	41	-0.280083	-0.832488	0.748148	0.902787	1	1611	tags=17%, list=8%, signal=19%
GOBP_NEGATIVE_REGULATION_OF_INTERLEUKIN_8_PRODUCTION	12	-0.462033	-1.05265	0.3954	0.687736	1	722	tags=17%, list=4%, signal=17%
GOBP_NEGATIVE_REGULATION_OF_INTRACELLULAR_ESTROGEN_RECEPTOR_SIGNALING_PATHWAY	14	-0.532143	-1.24947	0.195175	0.501501	1	1101	tags=29%, list=6%, signal=30%
GOBP_NEGATIVE_REGULATION_OF_INTRACELLULAR_PROTEIN_TRANSPORT	45	-0.385767	-1.17623	0.212446	0.563767	1	2930	tags=20%, list=15%, signal=24%
GOBP_NEGATIVE_REGULATION_OF_INTRACELLULAR_TRANSPORT	62	-0.372998	-1.18911	0.195842	0.551459	1	2310	tags=18%, list=12%, signal=20%
GOBP_NEGATIVE_REGULATION_OF_INTRINSIC_APOPTOTIC_SIGNALING_PATHWAY	101	-0.266553	-0.931401	0.588816	0.818062	1	2947	tags=24%, list=15%, signal=28%
GOBP_NEGATIVE_REGULATION_OF_INTRINSIC_APOPTOTIC_SIGNALING_PATHWAY_BY_P53_CLASS_MEDIATOR	21	-0.385018	-0.98877	0.454148	0.752203	1	827	tags=14%, list=4%, signal=15%
GOBP_NEGATIVE_REGULATION_OF_INTRINSIC_APOPTOTIC_SIGNALING_PATHWAY_IN_RESPONSE_TO_DNA_DAMAGE	25	-0.505307	-1.35941	0.0989247	0.406919	1	827	tags=20%, list=4%, signal=21%
GOBP_NEGATIVE_REGULATION_OF_INTRINSIC_APOPTOTIC_SIGNALING_PATHWAY_IN_RESPONSE_TO_DNA_DAMAGE_BY_P53_CLASS_MEDIATOR	11	-0.62125	-1.3869	0.120126	0.389519	1	827	tags=27%, list=4%, signal=28%
GOBP_NEGATIVE_REGULATION_OF_IRON_ION_TRANSMEMBRANE_TRANSPORT	3	-0.762696	-1.22027	0.261271	0.527482	1	277	tags=33%, list=1%, signal=34%
GOBP_NEGATIVE_REGULATION_OF_IRON_ION_TRANSPORT	3	-0.762696	-1.22663	0.257028	0.522073	1	277	tags=33%, list=1%, signal=34%
GOBP_NEGATIVE_REGULATION_OF_ISOPRENOID_METABOLIC_PROCESS	3	-0.779377	-1.25221	0.222336	0.498118	1	4281	tags=100%, list=22%, signal=128%
GOBP_NEGATIVE_REGULATION_OF_ISOTYPE_SWITCHING	4	-0.25199	-0.440855	0.987978	0.998811	1	4551	tags=50%, list=23%, signal=65%
GOBP_NEGATIVE_REGULATION_OF_JUN_KINASE_ACTIVITY	14	-0.408227	-0.964446	0.486884	0.779225	1	3488	tags=36%, list=18%, signal=44%
GOBP_NEGATIVE_REGULATION_OF_KERATINOCYTE_DIFFERENTIATION	8	-0.372319	-0.75457	0.75	0.952393	1	1953	tags=25%, list=10%, signal=28%
GOBP_NEGATIVE_REGULATION_OF_KINASE_ACTIVITY	203	-0.24294	-0.929858	0.655644	0.819165	1	2955	tags=20%, list=15%, signal=24%
GOBP_NEGATIVE_REGULATION_OF_LAMELLIPODIUM_ASSEMBLY	4	-0.884405	-1.5384	0.0243129	0.272497	1	1187	tags=50%, list=6%, signal=53%
GOBP_NEGATIVE_REGULATION_OF_LAMELLIPODIUM_ORGANIZATION	6	-0.836748	-1.62842	0.0185759	0.196236	1	1187	tags=33%, list=6%, signal=35%
GOBP_NEGATIVE_REGULATION_OF_LEUKOCYTE_APOPTOTIC_PROCESS	52	-0.325955	-1.00999	0.437693	0.731506	1	2947	tags=29%, list=15%, signal=34%
GOBP_NEGATIVE_REGULATION_OF_LEUKOCYTE_CELL_CELL_ADHESION	118	-0.335233	-1.20091	0.133708	0.54235	1	4675	tags=35%, list=24%, signal=46%
GOBP_NEGATIVE_REGULATION_OF_LEUKOCYTE_CHEMOTAXIS	15	-0.438896	-1.04919	0.40708	0.690446	1	187	tags=13%, list=1%, signal=13%
GOBP_NEGATIVE_REGULATION_OF_LEUKOCYTE_DEGRANULATION	11	-0.271056	-0.596901	0.933405	0.987814	1	5017	tags=55%, list=26%, signal=74%
GOBP_NEGATIVE_REGULATION_OF_LEUKOCYTE_MEDIATED_IMMUNITY	64	-0.320215	-1.03519	0.379853	0.704195	1	5017	tags=47%, list=26%, signal=63%
GOBP_NEGATIVE_REGULATION_OF_LEUKOCYTE_MIGRATION	40	-0.496436	-1.46651	0.0354458	0.341128	1	583	tags=15%, list=3%, signal=15%
GOBP_NEGATIVE_REGULATION_OF_LEUKOCYTE_PROLIFERATION	82	-0.40526	-1.36305	0.052809	0.4035	1	3366	tags=27%, list=17%, signal=32%
GOBP_NEGATIVE_REGULATION_OF_LIPID_BIOSYNTHETIC_PROCESS	54	-0.390334	-1.22681	0.164097	0.52254	1	3259	tags=35%, list=17%, signal=42%
GOBP_NEGATIVE_REGULATION_OF_LIPID_CATABOLIC_PROCESS	24	-0.432397	-1.15986	0.265111	0.57869	1	931	tags=13%, list=5%, signal=13%
GOBP_NEGATIVE_REGULATION_OF_LIPID_LOCALIZATION	46	-0.29995	-0.913017	0.599156	0.834148	1	2477	tags=22%, list=13%, signal=25%
GOBP_NEGATIVE_REGULATION_OF_LIPID_METABOLIC_PROCESS	93	-0.421184	-1.4557	0.0241228	0.34789	1	3405	tags=32%, list=18%, signal=39%
GOBP_NEGATIVE_REGULATION_OF_LIPID_STORAGE	19	-0.409942	-1.04899	0.390707	0.690157	1	3138	tags=26%, list=16%, signal=31%
GOBP_NEGATIVE_REGULATION_OF_LIPID_TRANSPORT	31	-0.261608	-0.729696	0.872999	0.961157	1	2477	tags=23%, list=13%, signal=26%
GOBP_NEGATIVE_REGULATION_OF_LIPOPROTEIN_METABOLIC_PROCESS	5	-0.929655	-1.72608	0.00109529	0.112604	1	467	tags=60%, list=2%, signal=61%
GOBP_NEGATIVE_REGULATION_OF_LIPOPROTEIN_PARTICLE_CLEARANCE	9	-0.440014	-0.944198	0.531151	0.804757	1	891	tags=22%, list=5%, signal=23%
GOBP_NEGATIVE_REGULATION_OF_LOCOMOTION	319	-0.357822	-1.43499	0.00348432	0.360061	1	2023	tags=18%, list=10%, signal=20%
GOBP_NEGATIVE_REGULATION_OF_LOW_DENSITY_LIPOPROTEIN_PARTICLE_CLEARANCE	7	-0.509955	-1.03102	0.438429	0.707398	1	891	tags=29%, list=5%, signal=30%
GOBP_NEGATIVE_REGULATION_OF_LYMPHOCYTE_ACTIVATION	137	-0.320666	-1.16123	0.154255	0.578472	1	4675	tags=35%, list=24%, signal=46%
GOBP_NEGATIVE_REGULATION_OF_LYMPHOCYTE_APOPTOTIC_PROCESS	36	-0.341184	-0.992155	0.464712	0.749345	1	2947	tags=31%, list=15%, signal=36%
GOBP_NEGATIVE_REGULATION_OF_LYMPHOCYTE_DIFFERENTIATION	47	-0.563769	-1.73275	0.00412371	0.111668	1	3460	tags=36%, list=18%, signal=44%
GOBP_NEGATIVE_REGULATION_OF_LYMPHOCYTE_MIGRATION	11	-0.706655	-1.56882	0.0394036	0.250627	1	365	tags=27%, list=2%, signal=28%
GOBP_NEGATIVE_REGULATION_OF_MACROAUTOPHAGY	30	-0.426444	-1.19504	0.210989	0.54517	1	2720	tags=27%, list=14%, signal=31%
GOBP_NEGATIVE_REGULATION_OF_MACROPHAGE_APOPTOTIC_PROCESS	5	-0.498962	-0.915751	0.573977	0.832877	1	3826	tags=20%, list=20%, signal=25%
GOBP_NEGATIVE_REGULATION_OF_MACROPHAGE_CHEMOTAXIS	5	-0.530017	-0.968481	0.528481	0.773966	1	4861	tags=80%, list=25%, signal=107%
GOBP_NEGATIVE_REGULATION_OF_MACROPHAGE_CYTOKINE_PRODUCTION	13	-0.448169	-1.0404	0.420771	0.699098	1	4358	tags=38%, list=22%, signal=50%
GOBP_NEGATIVE_REGULATION_OF_MACROPHAGE_DERIVED_FOAM_CELL_DIFFERENTIATION	8	-0.402196	-0.820093	0.687243	0.911793	1	7263	tags=75%, list=37%, signal=120%
GOBP_NEGATIVE_REGULATION_OF_MACROPHAGE_DIFFERENTIATION	5	-0.557722	-1.02493	0.462926	0.714591	1	2094	tags=40%, list=11%, signal=45%
GOBP_NEGATIVE_REGULATION_OF_MAST_CELL_ACTIVATION	12	-0.281454	-0.637148	0.905045	0.982607	1	2785	tags=25%, list=14%, signal=29%
GOBP_NEGATIVE_REGULATION_OF_MAST_CELL_ACTIVATION_INVOLVED_IN_IMMUNE_RESPONSE	9	-0.43596	-0.909405	0.572805	0.838227	1	5017	tags=56%, list=26%, signal=75%
GOBP_NEGATIVE_REGULATION_OF_MAST_CELL_DEGRANULATION	5	-0.67929	-1.24608	0.241307	0.503937	1	5017	tags=80%, list=26%, signal=108%
GOBP_NEGATIVE_REGULATION_OF_MEIOTIC_CELL_CYCLE_PHASE_TRANSITION	3	-0.58249	-0.937712	0.58871	0.81312	1	2263	tags=33%, list=12%, signal=38%
GOBP_NEGATIVE_REGULATION_OF_MEMBRANE_DEPOLARIZATION	5	-0.446249	-0.819703	0.669734	0.912133	1	2414	tags=40%, list=12%, signal=46%
GOBP_NEGATIVE_REGULATION_OF_MEMBRANE_PERMEABILITY	21	-0.304517	-0.797165	0.735141	0.928049	1	6269	tags=52%, list=32%, signal=77%
GOBP_NEGATIVE_REGULATION_OF_MEMBRANE_POTENTIAL	13	-0.403074	-0.94257	0.524352	0.806634	1	5070	tags=54%, list=26%, signal=73%
GOBP_NEGATIVE_REGULATION_OF_MEMBRANE_PROTEIN_ECTODOMAIN_PROTEOLYSIS	5	-0.699193	-1.26209	0.215301	0.488235	1	334	tags=20%, list=2%, signal=20%
GOBP_NEGATIVE_REGULATION_OF_MESENCHYMAL_CELL_APOPTOTIC_PROCESS	9	-0.326575	-0.688326	0.812568	0.97476	1	2869	tags=44%, list=15%, signal=52%
GOBP_NEGATIVE_REGULATION_OF_MESENCHYMAL_CELL_PROLIFERATION	9	-0.39205	-0.839868	0.64755	0.8957	1	1896	tags=22%, list=10%, signal=25%
GOBP_NEGATIVE_REGULATION_OF_MHC_CLASS_II_BIOSYNTHETIC_PROCESS	4	-0.511877	-0.898268	0.619487	0.846152	1	673	tags=25%, list=3%, signal=26%
GOBP_NEGATIVE_REGULATION_OF_MICROGLIAL_CELL_ACTIVATION	6	-0.562812	-1.09548	0.396607	0.64267	1	3104	tags=50%, list=16%, signal=60%
GOBP_NEGATIVE_REGULATION_OF_MITOCHONDRIAL_FISSION	9	-0.598088	-1.27399	0.18705	0.477869	1	2574	tags=44%, list=13%, signal=51%
GOBP_NEGATIVE_REGULATION_OF_MITOCHONDRIAL_MEMBRANE_POTENTIAL	12	-0.405875	-0.930995	0.554098	0.818474	1	5070	tags=58%, list=26%, signal=79%
GOBP_NEGATIVE_REGULATION_OF_MITOCHONDRIAL_OUTER_MEMBRANE_PERMEABILIZATION_INVOLVED_IN_APOPTOTIC_SIGNALING_PATHWAY	11	-0.241145	-0.541049	0.942553	0.99365	1	6269	tags=64%, list=32%, signal=94%
GOBP_NEGATIVE_REGULATION_OF_MITOCHONDRION_ORGANIZATION	53	-0.227758	-0.704643	0.930586	0.972845	1	4658	tags=30%, list=24%, signal=40%
GOBP_NEGATIVE_REGULATION_OF_MITOTIC_CELL_CYCLE	218	-0.30742	-1.18577	0.106286	0.554264	1	2107	tags=15%, list=11%, signal=17%
GOBP_NEGATIVE_REGULATION_OF_MITOTIC_CELL_CYCLE_PHASE_TRANSITION	166	-0.306294	-1.14543	0.178458	0.591105	1	2107	tags=14%, list=11%, signal=16%
GOBP_NEGATIVE_REGULATION_OF_MITOTIC_RECOMBINATION	4	-0.299149	-0.520034	0.948852	0.995579	1	13591	tags=100%, list=70%, signal=334%
GOBP_NEGATIVE_REGULATION_OF_MONOCYTE_CHEMOTACTIC_PROTEIN_1_PRODUCTION	8	-0.770051	-1.57881	0.0351648	0.242895	1	1319	tags=38%, list=7%, signal=40%
GOBP_NEGATIVE_REGULATION_OF_MONONUCLEAR_CELL_MIGRATION	18	-0.512022	-1.28904	0.160215	0.463046	1	365	tags=17%, list=2%, signal=17%
GOBP_NEGATIVE_REGULATION_OF_MORPHOGENESIS_OF_AN_EPITHELIUM	6	-0.396184	-0.764743	0.731707	0.946116	1	2938	tags=50%, list=15%, signal=59%
GOBP_NEGATIVE_REGULATION_OF_MOTOR_NEURON_APOPTOTIC_PROCESS	13	-0.49551	-1.12874	0.32321	0.607766	1	2527	tags=38%, list=13%, signal=44%
GOBP_NEGATIVE_REGULATION_OF_MRNA_PROCESSING	24	-0.232482	-0.609885	0.969104	0.986591	1	287	tags=4%, list=1%, signal=4%
GOBP_NEGATIVE_REGULATION_OF_MULTICELLULAR_ORGANISM_GROWTH	14	-0.468519	-1.12244	0.316667	0.613882	1	1222	tags=21%, list=6%, signal=23%
GOBP_NEGATIVE_REGULATION_OF_MUSCLE_ORGAN_DEVELOPMENT	11	-0.634871	-1.42336	0.100559	0.365097	1	3019	tags=45%, list=16%, signal=54%
GOBP_NEGATIVE_REGULATION_OF_MUSCLE_TISSUE_DEVELOPMENT	17	-0.658998	-1.63524	0.0251641	0.189962	1	435	tags=24%, list=2%, signal=24%
GOBP_NEGATIVE_REGULATION_OF_MYELINATION	9	-0.424608	-0.897306	0.585912	0.847395	1	2113	tags=33%, list=11%, signal=37%
GOBP_NEGATIVE_REGULATION_OF_MYELOID_CELL_APOPTOTIC_PROCESS	19	-0.321042	-0.811425	0.717127	0.918495	1	3826	tags=37%, list=20%, signal=46%
GOBP_NEGATIVE_REGULATION_OF_MYELOID_CELL_DIFFERENTIATION	75	-0.289857	-0.971855	0.491898	0.770731	1	2600	tags=17%, list=13%, signal=20%
GOBP_NEGATIVE_REGULATION_OF_MYELOID_LEUKOCYTE_DIFFERENTIATION	46	-0.478183	-1.48254	0.04	0.326132	1	2149	tags=22%, list=11%, signal=24%
GOBP_NEGATIVE_REGULATION_OF_MYOBLAST_DIFFERENTIATION	26	-0.543531	-1.44762	0.0562633	0.351359	1	3654	tags=46%, list=19%, signal=57%
GOBP_NEGATIVE_REGULATION_OF_NATURAL_KILLER_CELL_MEDIATED_IMMUNITY	24	-0.49982	-1.32812	0.125405	0.435125	1	5177	tags=63%, list=27%, signal=85%
GOBP_NEGATIVE_REGULATION_OF_NERVOUS_SYSTEM_DEVELOPMENT	172	-0.400505	-1.49982	0.00328587	0.311553	1	820	tags=14%, list=4%, signal=14%
GOBP_NEGATIVE_REGULATION_OF_NERVOUS_SYSTEM_PROCESS	19	-0.345124	-0.868748	0.656793	0.874015	1	2113	tags=21%, list=11%, signal=24%
GOBP_NEGATIVE_REGULATION_OF_NEURAL_PRECURSOR_CELL_PROLIFERATION	32	-0.505879	-1.44464	0.0615224	0.354407	1	698	tags=19%, list=4%, signal=19%
GOBP_NEGATIVE_REGULATION_OF_NEUROBLAST_PROLIFERATION	16	-0.331544	-0.799402	0.720251	0.926611	1	698	tags=13%, list=4%, signal=13%
GOBP_NEGATIVE_REGULATION_OF_NEUROINFLAMMATORY_RESPONSE	11	-0.408898	-0.92211	0.567769	0.828482	1	3104	tags=36%, list=16%, signal=43%
GOBP_NEGATIVE_REGULATION_OF_NEURON_APOPTOTIC_PROCESS	197	-0.315217	-1.21154	0.077095	0.534197	1	1421	tags=15%, list=7%, signal=16%
GOBP_NEGATIVE_REGULATION_OF_NEURON_DIFFERENTIATION	80	-0.29476	-0.994602	0.457592	0.746929	1	2738	tags=20%, list=14%, signal=23%
GOBP_NEGATIVE_REGULATION_OF_NEURON_MATURATION	5	-0.633732	-1.15386	0.336766	0.584334	1	80	tags=20%, list=0%, signal=20%
GOBP_NEGATIVE_REGULATION_OF_NEURON_PROJECTION_DEVELOPMENT	158	-0.467479	-1.72689	0	0.112819	1	984	tags=18%, list=5%, signal=19%
GOBP_NEGATIVE_REGULATION_OF_NEURON_PROJECTION_REGENERATION	18	-0.41447	-1.0381	0.414685	0.702052	1	772	tags=22%, list=4%, signal=23%
GOBP_NEGATIVE_REGULATION_OF_NEUROTROPHIN_TRK_RECEPTOR_SIGNALING_PATHWAY	5	-0.465409	-0.847625	0.668024	0.889921	1	515	tags=20%, list=3%, signal=21%
GOBP_NEGATIVE_REGULATION_OF_NEUTROPHIL_MIGRATION	5	-0.809655	-1.47446	0.0548654	0.332632	1	1443	tags=40%, list=7%, signal=43%
GOBP_NEGATIVE_REGULATION_OF_NITRIC_OXIDE_SYNTHASE_BIOSYNTHETIC_PROCESS	8	-0.616456	-1.27404	0.214135	0.478199	1	2862	tags=38%, list=15%, signal=44%
GOBP_NEGATIVE_REGULATION_OF_NON_CANONICAL_NF_KAPPAB_SIGNAL_TRANSDUCTION	24	-0.388209	-1.03366	0.415449	0.705329	1	1541	tags=17%, list=8%, signal=18%
GOBP_NEGATIVE_REGULATION_OF_NON_CANONICAL_WNT_SIGNALING_PATHWAY	8	-0.442832	-0.916311	0.55786	0.832655	1	345	tags=13%, list=2%, signal=13%
GOBP_NEGATIVE_REGULATION_OF_NOTCH_SIGNALING_PATHWAY	38	-0.304898	-0.898818	0.612335	0.84636	1	2097	tags=18%, list=11%, signal=21%
GOBP_NEGATIVE_REGULATION_OF_NUCLEAR_DIVISION	60	-0.310574	-0.997616	0.438717	0.743121	1	3810	tags=25%, list=20%, signal=31%
GOBP_NEGATIVE_REGULATION_OF_NUCLEAR_TRANSCRIBED_MRNA_CATABOLIC_PROCESS_NONSENSE_MEDIATED_DECAY	7	-0.303302	-0.597413	0.906089	0.987724	1	2787	tags=29%, list=14%, signal=33%
GOBP_NEGATIVE_REGULATION_OF_NUCLEASE_ACTIVITY	6	-0.460235	-0.880944	0.623077	0.863687	1	422	tags=17%, list=2%, signal=17%
GOBP_NEGATIVE_REGULATION_OF_NUCLEOCYTOPLASMIC_TRANSPORT	27	-0.476418	-1.28843	0.138593	0.463049	1	2850	tags=22%, list=15%, signal=26%
GOBP_NEGATIVE_REGULATION_OF_OLIGODENDROCYTE_DIFFERENTIATION	18	-0.532086	-1.33664	0.133758	0.42555	1	567	tags=22%, list=3%, signal=23%
GOBP_NEGATIVE_REGULATION_OF_OOCYTE_MATURATION	5	-0.702229	-1.29565	0.18284	0.457633	1	5778	tags=100%, list=30%, signal=142%
GOBP_NEGATIVE_REGULATION_OF_ORGANELLE_ASSEMBLY	45	-0.366642	-1.11949	0.289011	0.616752	1	2977	tags=29%, list=15%, signal=34%
GOBP_NEGATIVE_REGULATION_OF_OSTEOBLAST_DIFFERENTIATION	52	-0.436154	-1.36287	0.0632497	0.403657	1	2540	tags=29%, list=13%, signal=33%
GOBP_NEGATIVE_REGULATION_OF_OSTEOCLAST_DIFFERENTIATION	28	-0.508458	-1.37033	0.0987124	0.399162	1	1390	tags=18%, list=7%, signal=19%
GOBP_NEGATIVE_REGULATION_OF_OXIDATIVE_STRESS_INDUCED_INTRINSIC_APOPTOTIC_SIGNALING_PATHWAY	23	-0.479463	-1.27472	0.153269	0.477774	1	3400	tags=35%, list=18%, signal=42%
GOBP_NEGATIVE_REGULATION_OF_OXIDATIVE_STRESS_INDUCED_NEURON_INTRINSIC_APOPTOTIC_SIGNALING_PATHWAY	10	-0.549677	-1.17765	0.290735	0.56271	1	2574	tags=40%, list=13%, signal=46%
GOBP_NEGATIVE_REGULATION_OF_PANCREATIC_JUICE_SECRETION	5	-0.504648	-0.94731	0.538223	0.801484	1	2216	tags=60%, list=11%, signal=68%
GOBP_NEGATIVE_REGULATION_OF_PEPTIDASE_ACTIVITY	138	-0.312645	-1.13704	0.20242	0.600007	1	1321	tags=15%, list=7%, signal=16%
GOBP_NEGATIVE_REGULATION_OF_PEPTIDYL_THREONINE_PHOSPHORYLATION	18	-0.535731	-1.35519	0.128788	0.409319	1	1441	tags=22%, list=7%, signal=24%
GOBP_NEGATIVE_REGULATION_OF_PEPTIDYL_TYROSINE_PHOSPHORYLATION	49	-0.301394	-0.929031	0.567452	0.820017	1	3625	tags=22%, list=19%, signal=28%
GOBP_NEGATIVE_REGULATION_OF_PERK_MEDIATED_UNFOLDED_PROTEIN_RESPONSE	5	-0.602979	-1.11276	0.377049	0.622422	1	430	tags=20%, list=2%, signal=20%
GOBP_NEGATIVE_REGULATION_OF_PHAGOCYTOSIS	23	-0.32188	-0.849951	0.688543	0.888386	1	3217	tags=30%, list=17%, signal=36%
GOBP_NEGATIVE_REGULATION_OF_PHOSPHATIDYLINOSITOL_3_KINASE_PROTEIN_KINASE_B_SIGNAL_TRANSDUCTION	52	-0.331897	-1.02884	0.389567	0.709711	1	2849	tags=25%, list=15%, signal=29%
GOBP_NEGATIVE_REGULATION_OF_PHOSPHOLIPID_METABOLIC_PROCESS	7	-0.74051	-1.47546	0.078534	0.332035	1	3705	tags=71%, list=19%, signal=88%
GOBP_NEGATIVE_REGULATION_OF_PHOTORECEPTOR_CELL_DIFFERENTIATION	7	-0.306518	-0.61786	0.900739	0.984444	1	5660	tags=71%, list=29%, signal=101%
GOBP_NEGATIVE_REGULATION_OF_PINOCYTOSIS	5	-0.562337	-1.0329	0.459877	0.705861	1	4735	tags=60%, list=24%, signal=79%
GOBP_NEGATIVE_REGULATION_OF_PLASMA_MEMBRANE_BOUNDED_CELL_PROJECTION_ASSEMBLY	35	-0.455155	-1.30862	0.121564	0.447417	1	1535	tags=17%, list=8%, signal=19%
GOBP_NEGATIVE_REGULATION_OF_PLASMINOGEN_ACTIVATION	7	-0.47525	-0.931581	0.539046	0.817999	1	3162	tags=57%, list=16%, signal=68%
GOBP_NEGATIVE_REGULATION_OF_PLATELET_ACTIVATION	15	-0.688261	-1.66647	0.0175246	0.158602	1	2056	tags=53%, list=11%, signal=60%
GOBP_NEGATIVE_REGULATION_OF_PLATELET_AGGREGATION	10	-0.652035	-1.40261	0.105996	0.376155	1	2056	tags=50%, list=11%, signal=56%
GOBP_NEGATIVE_REGULATION_OF_PLATELET_DERIVED_GROWTH_FACTOR_RECEPTOR_SIGNALING_PATHWAY	10	-0.603138	-1.30475	0.171053	0.450202	1	3	tags=10%, list=0%, signal=10%
GOBP_NEGATIVE_REGULATION_OF_POST_TRANSLATIONAL_PROTEIN_MODIFICATION	94	-0.245616	-0.849059	0.784079	0.888716	1	2370	tags=19%, list=12%, signal=22%
GOBP_NEGATIVE_REGULATION_OF_POTASSIUM_ION_TRANSMEMBRANE_TRANSPORT	23	-0.381496	-1.01017	0.445946	0.731439	1	1767	tags=22%, list=9%, signal=24%
GOBP_NEGATIVE_REGULATION_OF_POTASSIUM_ION_TRANSMEMBRANE_TRANSPORTER_ACTIVITY	19	-0.323321	-0.813847	0.721311	0.916356	1	1767	tags=21%, list=9%, signal=23%
GOBP_NEGATIVE_REGULATION_OF_PRODUCTION_OF_MOLECULAR_MEDIATOR_OF_IMMUNE_RESPONSE	33	-0.548563	-1.55351	0.0145228	0.267223	1	4756	tags=48%, list=25%, signal=64%
GOBP_NEGATIVE_REGULATION_OF_PROGRAMMED_NECROTIC_CELL_DEATH	18	-0.537008	-1.34142	0.12635	0.422653	1	2930	tags=44%, list=15%, signal=52%
GOBP_NEGATIVE_REGULATION_OF_PROTEIN_AUTOPHOSPHORYLATION	11	-0.512448	-1.13291	0.308263	0.603444	1	1895	tags=27%, list=10%, signal=30%
GOBP_NEGATIVE_REGULATION_OF_PROTEIN_BINDING	94	-0.301708	-1.04514	0.371849	0.694217	1	2501	tags=26%, list=13%, signal=29%
GOBP_NEGATIVE_REGULATION_OF_PROTEIN_CONTAINING_COMPLEX_ASSEMBLY	145	-0.27529	-1.01998	0.387347	0.719156	1	2000	tags=15%, list=10%, signal=17%
GOBP_NEGATIVE_REGULATION_OF_PROTEIN_EXIT_FROM_ENDOPLASMIC_RETICULUM	10	-0.431132	-0.938642	0.5383	0.81196	1	246	tags=10%, list=1%, signal=10%
GOBP_NEGATIVE_REGULATION_OF_PROTEIN_EXPORT_FROM_NUCLEUS	7	-0.532574	-1.04859	0.433468	0.690384	1	2125	tags=29%, list=11%, signal=32%
GOBP_NEGATIVE_REGULATION_OF_PROTEIN_FOLDING	6	-0.696281	-1.33136	0.173036	0.433453	1	1116	tags=17%, list=6%, signal=18%
GOBP_NEGATIVE_REGULATION_OF_PROTEIN_IMPORT_INTO_NUCLEUS	17	-0.562286	-1.38778	0.110053	0.38918	1	3	tags=6%, list=0%, signal=6%
GOBP_NEGATIVE_REGULATION_OF_PROTEIN_LOCALIZATION_TO_CELL_PERIPHERY	27	-0.446656	-1.22781	0.190987	0.522222	1	2630	tags=37%, list=14%, signal=43%
GOBP_NEGATIVE_REGULATION_OF_PROTEIN_LOCALIZATION_TO_CHROMATIN	6	-0.455528	-0.878085	0.605967	0.866031	1	2850	tags=33%, list=15%, signal=39%
GOBP_NEGATIVE_REGULATION_OF_PROTEIN_LOCALIZATION_TO_MEMBRANE	33	-0.364717	-1.04912	0.375796	0.690416	1	2630	tags=27%, list=14%, signal=31%
GOBP_NEGATIVE_REGULATION_OF_PROTEIN_LOCALIZATION_TO_MICROTUBULE	5	-0.428733	-0.778765	0.716088	0.94154	1	5476	tags=40%, list=28%, signal=56%
GOBP_NEGATIVE_REGULATION_OF_PROTEIN_LOCALIZATION_TO_NUCLEUS	41	-0.497003	-1.47946	0.0382932	0.32836	1	531	tags=10%, list=3%, signal=10%
GOBP_NEGATIVE_REGULATION_OF_PROTEIN_MATURATION	24	-0.351226	-0.948605	0.527533	0.800184	1	3162	tags=25%, list=16%, signal=30%
GOBP_NEGATIVE_REGULATION_OF_PROTEIN_NEDDYLATION	4	-0.28375	-0.491741	0.969729	0.997881	1	5806	tags=75%, list=30%, signal=107%
GOBP_NEGATIVE_REGULATION_OF_PROTEIN_SUMOYLATION	8	-0.387698	-0.798937	0.706441	0.926827	1	2125	tags=38%, list=11%, signal=42%
GOBP_NEGATIVE_REGULATION_OF_PROTEIN_TYROSINE_KINASE_ACTIVITY	25	-0.261838	-0.701856	0.89018	0.972529	1	2700	tags=16%, list=14%, signal=19%
GOBP_NEGATIVE_REGULATION_OF_PROTEOLYSIS	229	-0.308502	-1.21052	0.0703746	0.534635	1	2125	tags=17%, list=11%, signal=19%
GOBP_NEGATIVE_REGULATION_OF_PROTEOLYSIS_INVOLVED_IN_PROTEIN_CATABOLIC_PROCESS	65	-0.257276	-0.826738	0.778146	0.907687	1	3517	tags=25%, list=18%, signal=30%
GOBP_NEGATIVE_REGULATION_OF_REACTIVE_OXYGEN_SPECIES_METABOLIC_PROCESS	48	-0.308314	-0.94277	0.551983	0.806321	1	3192	tags=25%, list=16%, signal=30%
GOBP_NEGATIVE_REGULATION_OF_RECEPTOR_BINDING	11	-0.596816	-1.32042	0.153846	0.440651	1	1706	tags=45%, list=9%, signal=50%
GOBP_NEGATIVE_REGULATION_OF_RECEPTOR_MEDIATED_ENDOCYTOSIS	27	-0.277226	-0.757107	0.826271	0.9505	1	3174	tags=26%, list=16%, signal=31%
GOBP_NEGATIVE_REGULATION_OF_REGULATED_SECRETORY_PATHWAY	23	-0.375777	-0.983956	0.475992	0.757103	1	838	tags=17%, list=4%, signal=18%
GOBP_NEGATIVE_REGULATION_OF_REGULATORY_T_CELL_DIFFERENTIATION	5	-0.824907	-1.52565	0.0338059	0.285975	1	3400	tags=100%, list=18%, signal=121%
GOBP_NEGATIVE_REGULATION_OF_RELEASE_OF_CYTOCHROME_C_FROM_MITOCHONDRIA	22	-0.32339	-0.843395	0.680498	0.892731	1	5274	tags=45%, list=27%, signal=62%
GOBP_NEGATIVE_REGULATION_OF_REPRODUCTIVE_PROCESS	59	-0.376219	-1.20269	0.170968	0.54119	1	3529	tags=37%, list=18%, signal=45%
GOBP_NEGATIVE_REGULATION_OF_RESPIRATORY_BURST	6	-0.505701	-0.966429	0.518023	0.776229	1	4861	tags=67%, list=25%, signal=89%
GOBP_NEGATIVE_REGULATION_OF_RESPIRATORY_BURST_INVOLVED_IN_INFLAMMATORY_RESPONSE	4	-0.749497	-1.31475	0.179089	0.444972	1	4861	tags=100%, list=25%, signal=133%
GOBP_NEGATIVE_REGULATION_OF_RESPONSE_TO_CYTOKINE_STIMULUS	63	-0.277602	-0.8833	0.687163	0.86096	1	2000	tags=13%, list=10%, signal=14%
GOBP_NEGATIVE_REGULATION_OF_RESPONSE_TO_ENDOPLASMIC_RETICULUM_STRESS	40	-0.38658	-1.15413	0.232979	0.584097	1	2125	tags=25%, list=11%, signal=28%
GOBP_NEGATIVE_REGULATION_OF_RESPONSE_TO_EXTERNAL_STIMULUS	362	-0.291367	-1.18903	0.0673401	0.551431	1	2080	tags=16%, list=11%, signal=18%
GOBP_NEGATIVE_REGULATION_OF_RESPONSE_TO_TUMOR_CELL	5	-0.366727	-0.667987	0.830526	0.978124	1	4827	tags=60%, list=25%, signal=80%
GOBP_NEGATIVE_REGULATION_OF_RESPONSE_TO_WOUNDING	69	-0.481064	-1.57331	0.00757576	0.248107	1	2056	tags=28%, list=11%, signal=31%
GOBP_NEGATIVE_REGULATION_OF_RETINOIC_ACID_RECEPTOR_SIGNALING_PATHWAY	7	-0.541119	-1.07541	0.396552	0.663462	1	3353	tags=43%, list=17%, signal=52%
GOBP_NEGATIVE_REGULATION_OF_RHO_PROTEIN_SIGNAL_TRANSDUCTION	25	-0.305391	-0.821049	0.707113	0.911356	1	1327	tags=12%, list=7%, signal=13%
GOBP_NEGATIVE_REGULATION_OF_RNA_SPLICING	28	-0.406203	-1.11319	0.310521	0.622959	1	1250	tags=14%, list=6%, signal=15%
GOBP_NEGATIVE_REGULATION_OF_RUFFLE_ASSEMBLY	4	-0.366432	-0.633637	0.879188	0.982573	1	6441	tags=75%, list=33%, signal=112%
GOBP_NEGATIVE_REGULATION_OF_RYANODINE_SENSITIVE_CALCIUM_RELEASE_CHANNEL_ACTIVITY	8	-0.441578	-0.907041	0.563053	0.839316	1	2752	tags=38%, list=14%, signal=44%
GOBP_NEGATIVE_REGULATION_OF_SCHWANN_CELL_PROLIFERATION	9	-0.79861	-1.70074	0.0143003	0.133853	1	85	tags=22%, list=0%, signal=22%
GOBP_NEGATIVE_REGULATION_OF_SEQUESTERING_OF_TRIGLYCERIDE	6	-0.526024	-1.00766	0.485801	0.733839	1	3138	tags=50%, list=16%, signal=60%
GOBP_NEGATIVE_REGULATION_OF_SIGNAL_TRANSDUCTION_BY_P53_CLASS_MEDIATOR	31	-0.441354	-1.24017	0.168067	0.509598	1	827	tags=16%, list=4%, signal=17%
GOBP_NEGATIVE_REGULATION_OF_SIGNAL_TRANSDUCTION_IN_ABSENCE_OF_LIGAND	25	-0.310896	-0.830403	0.723629	0.904967	1	70	tags=4%, list=0%, signal=4%
GOBP_NEGATIVE_REGULATION_OF_SIGNALING_RECEPTOR_ACTIVITY	29	-0.371987	-1.03428	0.426802	0.704943	1	2125	tags=24%, list=11%, signal=27%
GOBP_NEGATIVE_REGULATION_OF_SKELETAL_MUSCLE_CELL_DIFFERENTIATION	5	-0.881602	-1.61186	0.0170032	0.212913	1	10	tags=20%, list=0%, signal=20%
GOBP_NEGATIVE_REGULATION_OF_SKELETAL_MUSCLE_TISSUE_DEVELOPMENT	6	-0.652569	-1.2599	0.236786	0.490295	1	68	tags=17%, list=0%, signal=17%
GOBP_NEGATIVE_REGULATION_OF_SMOOTH_MUSCLE_CELL_CHEMOTAXIS	5	-0.741114	-1.38696	0.100849	0.389654	1	2862	tags=40%, list=15%, signal=47%
GOBP_NEGATIVE_REGULATION_OF_SMOOTH_MUSCLE_CELL_MIGRATION	36	-0.590469	-1.72714	0.00627615	0.112929	1	2862	tags=36%, list=15%, signal=42%
GOBP_NEGATIVE_REGULATION_OF_SMOOTH_MUSCLE_CELL_PROLIFERATION	63	-0.567872	-1.82465	0	0.0524144	0.9985	2527	tags=35%, list=13%, signal=40%
GOBP_NEGATIVE_REGULATION_OF_SMOOTHENED_SIGNALING_PATHWAY	40	-0.283224	-0.846913	0.708645	0.890238	1	3432	tags=25%, list=18%, signal=30%
GOBP_NEGATIVE_REGULATION_OF_SPHINGOLIPID_BIOSYNTHETIC_PROCESS	6	-0.820323	-1.58728	0.0273396	0.236883	1	2221	tags=50%, list=11%, signal=56%
GOBP_NEGATIVE_REGULATION_OF_SPROUTING_ANGIOGENESIS	14	-0.542336	-1.28279	0.185185	0.470247	1	403	tags=14%, list=2%, signal=15%
GOBP_NEGATIVE_REGULATION_OF_STEM_CELL_DIFFERENTIATION	28	-0.515791	-1.42685	0.0654397	0.363393	1	4410	tags=57%, list=23%, signal=74%
GOBP_NEGATIVE_REGULATION_OF_STEM_CELL_PROLIFERATION	25	-0.572157	-1.52532	0.0228013	0.286346	1	1292	tags=12%, list=7%, signal=13%
GOBP_NEGATIVE_REGULATION_OF_STEROID_METABOLIC_PROCESS	23	-0.414157	-1.08822	0.33262	0.648699	1	3148	tags=43%, list=16%, signal=52%
GOBP_NEGATIVE_REGULATION_OF_STEROL_TRANSPORT	10	-0.429077	-0.928566	0.555794	0.820552	1	1990	tags=30%, list=10%, signal=33%
GOBP_NEGATIVE_REGULATION_OF_STRIATED_MUSCLE_CELL_APOPTOTIC_PROCESS	35	-0.254386	-0.731882	0.872946	0.961218	1	3940	tags=34%, list=20%, signal=43%
GOBP_NEGATIVE_REGULATION_OF_STRIATED_MUSCLE_CONTRACTION	8	-0.70423	-1.44708	0.0942623	0.351963	1	250	tags=25%, list=1%, signal=25%
GOBP_NEGATIVE_REGULATION_OF_SUPEROXIDE_ANION_GENERATION	4	-0.37344	-0.653408	0.838095	0.981084	1	4358	tags=75%, list=22%, signal=97%
GOBP_NEGATIVE_REGULATION_OF_SUPRAMOLECULAR_FIBER_ORGANIZATION	169	-0.28317	-1.06047	0.317992	0.677651	1	2025	tags=17%, list=10%, signal=18%
GOBP_NEGATIVE_REGULATION_OF_SYSTEMIC_ARTERIAL_BLOOD_PRESSURE	26	-0.393371	-1.07603	0.358011	0.66277	1	1222	tags=15%, list=6%, signal=16%
GOBP_NEGATIVE_REGULATION_OF_T_CELL_APOPTOTIC_PROCESS	25	-0.412512	-1.11031	0.302905	0.626285	1	2564	tags=32%, list=13%, signal=37%
GOBP_NEGATIVE_REGULATION_OF_T_CELL_CYTOKINE_PRODUCTION	4	-0.85107	-1.45009	0.051882	0.351229	1	2358	tags=75%, list=12%, signal=85%
GOBP_NEGATIVE_REGULATION_OF_T_CELL_DIFFERENTIATION_IN_THYMUS	10	-0.469595	-1.01021	0.465241	0.731526	1	3038	tags=40%, list=16%, signal=47%
GOBP_NEGATIVE_REGULATION_OF_T_CELL_MIGRATION	6	-0.769619	-1.46593	0.0636267	0.341072	1	365	tags=33%, list=2%, signal=34%
GOBP_NEGATIVE_REGULATION_OF_T_CELL_PROLIFERATION	62	-0.373934	-1.21054	0.153094	0.534791	1	2358	tags=21%, list=12%, signal=24%
GOBP_NEGATIVE_REGULATION_OF_T_CELL_RECEPTOR_SIGNALING_PATHWAY	19	-0.353979	-0.900114	0.600223	0.846338	1	3201	tags=26%, list=17%, signal=31%
GOBP_NEGATIVE_REGULATION_OF_T_HELPER_1_TYPE_IMMUNE_RESPONSE	6	-0.841779	-1.59257	0.0236626	0.229598	1	30	tags=17%, list=0%, signal=17%
GOBP_NEGATIVE_REGULATION_OF_T_HELPER_17_TYPE_IMMUNE_RESPONSE	8	-0.562165	-1.1561	0.30083	0.581466	1	1441	tags=25%, list=7%, signal=27%
GOBP_NEGATIVE_REGULATION_OF_T_HELPER_2_CELL_DIFFERENTIATION	7	-0.242625	-0.478523	0.980084	0.997808	1	3309	tags=29%, list=17%, signal=34%
GOBP_NEGATIVE_REGULATION_OF_T_HELPER_CELL_DIFFERENTIATION	15	-0.421456	-1.00424	0.459746	0.737412	1	3309	tags=27%, list=17%, signal=32%
GOBP_NEGATIVE_REGULATION_OF_TELOMERE_MAINTENANCE_IN_RESPONSE_TO_DNA_DAMAGE	5	-0.498872	-0.908412	0.603448	0.838894	1	2962	tags=40%, list=15%, signal=47%
GOBP_NEGATIVE_REGULATION_OF_THYMOCYTE_APOPTOTIC_PROCESS	10	-0.416567	-0.900026	0.582441	0.846181	1	1896	tags=30%, list=10%, signal=33%
GOBP_NEGATIVE_REGULATION_OF_TISSUE_REMODELING	23	-0.426459	-1.13542	0.284501	0.600449	1	1390	tags=26%, list=7%, signal=28%
GOBP_NEGATIVE_REGULATION_OF_TOLL_LIKE_RECEPTOR_2_SIGNALING_PATHWAY	5	-0.357342	-0.654293	0.864638	0.981094	1	2000	tags=20%, list=10%, signal=22%
GOBP_NEGATIVE_REGULATION_OF_TOLL_LIKE_RECEPTOR_4_SIGNALING_PATHWAY	7	-0.660505	-1.31356	0.169263	0.446272	1	2000	tags=29%, list=10%, signal=32%
GOBP_NEGATIVE_REGULATION_OF_TRANSCRIPTION_ELONGATION_BY_RNA_POLYMERASE_II	15	-0.285223	-0.680247	0.858044	0.976316	1	2850	tags=27%, list=15%, signal=31%
GOBP_NEGATIVE_REGULATION_OF_TRANSCRIPTION_FROM_RNA_POLYMERASE_II_PROMOTER_IN_RESPONSE_TO_ENDOPLASMIC_RETICULUM_STRESS	5	-0.460946	-0.850402	0.643158	0.888033	1	422	tags=20%, list=2%, signal=20%
GOBP_NEGATIVE_REGULATION_OF_TRANSCRIPTION_FROM_RNA_POLYMERASE_II_PROMOTER_IN_RESPONSE_TO_STRESS	9	-0.698549	-1.47372	0.0797024	0.33334	1	894	tags=33%, list=5%, signal=35%
GOBP_NEGATIVE_REGULATION_OF_TRANSCRIPTION_REGULATORY_REGION_DNA_BINDING	15	-0.487524	-1.18149	0.248441	0.557878	1	2752	tags=40%, list=14%, signal=47%
GOBP_NEGATIVE_REGULATION_OF_TRANSFERASE_ACTIVITY	237	-0.270371	-1.05056	0.311111	0.689054	1	3034	tags=22%, list=16%, signal=26%
GOBP_NEGATIVE_REGULATION_OF_TRANSFORMING_GROWTH_FACTOR_BETA_PRODUCTION	9	-0.677606	-1.42986	0.0849539	0.361867	1	585	tags=22%, list=3%, signal=23%
GOBP_NEGATIVE_REGULATION_OF_TRANSFORMING_GROWTH_FACTOR_BETA1_PRODUCTION	5	-0.696831	-1.27498	0.209118	0.478327	1	5048	tags=80%, list=26%, signal=108%
GOBP_NEGATIVE_REGULATION_OF_TRANSLATION_IN_RESPONSE_TO_STRESS	6	-0.283754	-0.551208	0.92827	0.992761	1	13890	tags=100%, list=72%, signal=352%
GOBP_NEGATIVE_REGULATION_OF_TRANSLATIONAL_ELONGATION	5	-0.347452	-0.637024	0.867924	0.982525	1	12655	tags=100%, list=65%, signal=288%
GOBP_NEGATIVE_REGULATION_OF_TRANSLATIONAL_INITIATION	20	-0.204882	-0.512053	0.983015	0.996129	1	5124	tags=30%, list=26%, signal=41%
GOBP_NEGATIVE_REGULATION_OF_TRANSMISSION_OF_NERVE_IMPULSE	7	-0.442003	-0.869986	0.612971	0.873236	1	564	tags=14%, list=3%, signal=15%
GOBP_NEGATIVE_REGULATION_OF_TRIGLYCERIDE_CATABOLIC_PROCESS	5	-0.764915	-1.40345	0.109015	0.377111	1	145	tags=20%, list=1%, signal=20%
GOBP_NEGATIVE_REGULATION_OF_TRIGLYCERIDE_METABOLIC_PROCESS	13	-0.597141	-1.39252	0.11041	0.387597	1	1472	tags=31%, list=8%, signal=33%
GOBP_NEGATIVE_REGULATION_OF_TROPHOBLAST_CELL_MIGRATION	4	-0.379881	-0.664747	0.830128	0.978996	1	3353	tags=50%, list=17%, signal=60%
GOBP_NEGATIVE_REGULATION_OF_TUMOR_NECROSIS_FACTOR_MEDIATED_SIGNALING_PATHWAY	18	-0.522717	-1.29404	0.153115	0.459183	1	5834	tags=61%, list=30%, signal=87%
GOBP_NEGATIVE_REGULATION_OF_TUMOR_NECROSIS_FACTOR_SUPERFAMILY_CYTOKINE_PRODUCTION	56	-0.226975	-0.731822	0.909774	0.96095	1	2862	tags=16%, list=15%, signal=19%
GOBP_NEGATIVE_REGULATION_OF_TYPE_B_PANCREATIC_CELL_APOPTOTIC_PROCESS	7	-0.365981	-0.730161	0.779915	0.961308	1	6675	tags=57%, list=34%, signal=87%
GOBP_NEGATIVE_REGULATION_OF_TYPE_II_INTERFERON_PRODUCTION	24	-0.5704	-1.50477	0.0435244	0.307611	1	2358	tags=25%, list=12%, signal=28%
GOBP_NEGATIVE_REGULATION_OF_UBIQUITIN_DEPENDENT_PROTEIN_CATABOLIC_PROCESS	51	-0.269368	-0.842645	0.741342	0.893279	1	3517	tags=25%, list=18%, signal=31%
GOBP_NEGATIVE_REGULATION_OF_UBIQUITIN_PROTEIN_LIGASE_ACTIVITY	8	-0.54831	-1.12595	0.346112	0.610863	1	5806	tags=63%, list=30%, signal=89%
GOBP_NEGATIVE_REGULATION_OF_UBIQUITIN_PROTEIN_TRANSFERASE_ACTIVITY	16	-0.646091	-1.55568	0.0451613	0.266135	1	3034	tags=44%, list=16%, signal=52%
GOBP_NEGATIVE_REGULATION_OF_URINE_VOLUME	8	-0.307097	-0.623885	0.892039	0.982904	1	3026	tags=25%, list=16%, signal=30%
GOBP_NEGATIVE_REGULATION_OF_VASCULAR_ASSOCIATED_SMOOTH_MUSCLE_CELL_APOPTOTIC_PROCESS	6	-0.283857	-0.540274	0.936966	0.99375	1	13888	tags=100%, list=72%, signal=352%
GOBP_NEGATIVE_REGULATION_OF_VASCULAR_ASSOCIATED_SMOOTH_MUSCLE_CELL_MIGRATION	13	-0.616381	-1.44372	0.0891192	0.354304	1	2527	tags=38%, list=13%, signal=44%
GOBP_NEGATIVE_REGULATION_OF_VASCULAR_ASSOCIATED_SMOOTH_MUSCLE_CELL_PROLIFERATION	32	-0.505335	-1.42491	0.0658747	0.363306	1	2862	tags=38%, list=15%, signal=44%
GOBP_NEGATIVE_REGULATION_OF_VASCULAR_ENDOTHELIAL_GROWTH_FACTOR_RECEPTOR_SIGNALING_PATHWAY	12	-0.372777	-0.859489	0.633787	0.881646	1	2086	tags=25%, list=11%, signal=28%
GOBP_NEGATIVE_REGULATION_OF_VASCULAR_PERMEABILITY	20	-0.558945	-1.44442	0.0640341	0.354608	1	1529	tags=30%, list=8%, signal=33%
GOBP_NEGATIVE_REGULATION_OF_VASCULAR_WOUND_HEALING	4	-0.690868	-1.19192	0.278926	0.548859	1	339	tags=25%, list=2%, signal=25%
GOBP_NEGATIVE_REGULATION_OF_VASCULATURE_DEVELOPMENT	98	-0.343529	-1.19088	0.171141	0.549831	1	1363	tags=14%, list=7%, signal=15%
GOBP_NEGATIVE_REGULATION_OF_VIRAL_GENOME_REPLICATION	44	-0.237502	-0.715744	0.904139	0.966822	1	2851	tags=18%, list=15%, signal=21%
GOBP_NEGATIVE_REGULATION_OF_VIRAL_INDUCED_CYTOPLASMIC_PATTERN_RECOGNITION_RECEPTOR_SIGNALING_PATHWAY	34	-0.317768	-0.910866	0.597771	0.836515	1	3451	tags=29%, list=18%, signal=36%
GOBP_NEGATIVE_REGULATION_OF_VIRAL_LIFE_CYCLE	29	-0.482554	-1.33306	0.102754	0.431271	1	766	tags=10%, list=4%, signal=11%
GOBP_NEGATIVE_REGULATION_OF_VIRAL_PROCESS	83	-0.303675	-1.02148	0.387821	0.717752	1	2851	tags=17%, list=15%, signal=20%
GOBP_NEGATIVE_REGULATION_OF_VIRAL_TRANSCRIPTION	17	-0.27236	-0.684395	0.897167	0.975254	1	4786	tags=29%, list=25%, signal=39%
GOBP_NEGATIVE_REGULATION_OF_VITAMIN_D_BIOSYNTHETIC_PROCESS	4	-0.800196	-1.38894	0.10582	0.388778	1	3148	tags=75%, list=16%, signal=90%
GOBP_NEGATIVE_REGULATION_OF_VITAMIN_METABOLIC_PROCESS	7	-0.761885	-1.51882	0.052017	0.292138	1	4281	tags=86%, list=22%, signal=110%
GOBP_NEGATIVE_REGULATION_OF_WNT_SIGNALING_PATHWAY	153	-0.343804	-1.27001	0.0676118	0.483405	1	2910	tags=23%, list=15%, signal=27%
GOBP_NEGATIVE_REGULATION_OF_WOUND_HEALING	48	-0.504659	-1.54597	0.0223714	0.273422	1	2056	tags=31%, list=11%, signal=35%
GOBP_NEPHRIC_DUCT_FORMATION	3	-0.852213	-1.39283	0.077577	0.387443	1	2869	tags=100%, list=15%, signal=117%
GOBP_NEPHRON_DEVELOPMENT	140	-0.32612	-1.20157	0.117155	0.542087	1	1420	tags=15%, list=7%, signal=16%
GOBP_NEPHRON_EPITHELIUM_DEVELOPMENT	100	-0.356384	-1.23483	0.12234	0.514481	1	1420	tags=17%, list=7%, signal=18%
GOBP_NEPHRON_TUBULE_EPITHELIAL_CELL_DIFFERENTIATION	11	-0.391607	-0.878082	0.63141	0.86586	1	219	tags=9%, list=1%, signal=9%
GOBP_NEPHRON_TUBULE_FORMATION	16	-0.401736	-0.977063	0.474595	0.765609	1	4014	tags=38%, list=21%, signal=47%
GOBP_NETRIN_ACTIVATED_SIGNALING_PATHWAY	8	-0.703948	-1.44359	0.0837867	0.353591	1	684	tags=25%, list=4%, signal=26%
GOBP_NEURAL_CREST_CELL_DIFFERENTIATION	90	-0.343904	-1.18327	0.161894	0.556214	1	2023	tags=18%, list=10%, signal=20%
GOBP_NEURAL_FOLD_FORMATION	9	-0.368779	-0.774748	0.725738	0.942806	1	1579	tags=22%, list=8%, signal=24%
GOBP_NEURAL_PRECURSOR_CELL_PROLIFERATION	209	-0.348956	-1.34882	0.00883002	0.418518	1	1500	tags=15%, list=8%, signal=16%
GOBP_NEURAL_TUBE_DEVELOPMENT	183	-0.233049	-0.889033	0.757127	0.854741	1	2149	tags=15%, list=11%, signal=16%
GOBP_NEURAL_TUBE_PATTERNING	43	-0.36723	-1.11797	0.288136	0.617796	1	2825	tags=26%, list=15%, signal=30%
GOBP_NEUROBLAST_DIFFERENTIATION	9	-0.453226	-0.959324	0.513721	0.786715	1	841	tags=22%, list=4%, signal=23%
GOBP_NEUROBLAST_DIVISION	15	-0.582368	-1.41191	0.109691	0.372608	1	435	tags=13%, list=2%, signal=14%
GOBP_NEUROBLAST_MIGRATION	8	-0.678655	-1.41112	0.1	0.37322	1	511	tags=38%, list=3%, signal=38%
GOBP_NEUROBLAST_PROLIFERATION	92	-0.407432	-1.40227	0.0300207	0.376382	1	1167	tags=14%, list=6%, signal=15%
GOBP_NEUROENDOCRINE_CELL_DIFFERENTIATION	14	-0.682673	-1.59484	0.0313853	0.226571	1	873	tags=21%, list=5%, signal=22%
[truncated: 4,414 more rows]

## Sheet: KO pos
NAME	SIZE	ES	NES	NOM.p.val	FDR.q.val	FWER.p.val	RANK.AT.MAX	LEADING.EDGE	clusterName
AHCY_AHCYL_TARGET_GENES	115	0.229505	0.817315	0.867871	0.896147	1	4166	tags=23%, list=21%, signal=30%
ASH1L_TARGET_GENES	10	0.55392	1.20162	0.250235	0.461776	1	3346	tags=40%, list=17%, signal=48%
ATAD2_TARGET_GENES	4	0.370084	0.626362	0.895853	0.983301	1	932	tags=25%, list=5%, signal=26%
BARX1_TARGET_GENES	6	0.685351	1.2976	0.177625	0.361409	1	2910	tags=50%, list=15%, signal=59%
BAZ1A_TARGET_GENES	433	0.258631	1.06326	0.247986	0.616672	1	3465	tags=21%, list=18%, signal=26%
BIOCARTA_41BB_PATHWAY	15	0.56352	1.361	0.111753	0.298292	1	2117	tags=33%, list=11%, signal=37%
BIOCARTA_ACETAMINOPHEN_PATHWAY	3	0.937313	1.49344	0.0146628	0.175639	1	3	tags=33%, list=0%, signal=33%
BIOCARTA_ACH_PATHWAY	12	0.663406	1.49295	0.0488281	0.176004	1	221	tags=17%, list=1%, signal=17%
BIOCARTA_ACTINY_PATHWAY	10	0.743186	1.61047	0.0242537	0.0908387	1	1532	tags=50%, list=8%, signal=54%
BIOCARTA_AGPCR_PATHWAY	10	0.768209	1.65217	0.0143541	0.0666241	1	1519	tags=60%, list=8%, signal=65%
BIOCARTA_AGR_PATHWAY	31	0.552714	1.55444	0.0241187	0.126318	1	2299	tags=39%, list=12%, signal=44%
BIOCARTA_AKAP95_PATHWAY	10	0.661188	1.42438	0.0742481	0.237975	1	3194	tags=50%, list=16%, signal=60%
BIOCARTA_AKAPCENTROSOME_PATHWAY	12	0.689504	1.55876	0.0299184	0.123544	1	1164	tags=33%, list=6%, signal=35%
BIOCARTA_AKT_PATHWAY	19	0.433172	1.07841	0.379603	0.600779	1	2117	tags=21%, list=11%, signal=24%
BIOCARTA_ALTERNATIVE_PATHWAY	5	0.624955	1.12449	0.35187	0.546869	1	385	tags=20%, list=2%, signal=20%
BIOCARTA_AMAN_PATHWAY	8	0.763111	1.56417	0.0291627	0.119439	1	118	tags=25%, list=1%, signal=25%
BIOCARTA_ARENRF2_PATHWAY	18	0.59923	1.48299	0.0351906	0.183793	1	1658	tags=39%, list=9%, signal=42%
BIOCARTA_AT1R_PATHWAY	25	0.676311	1.81299	0	0.0173765	0.987	2912	tags=52%, list=15%, signal=61%
BIOCARTA_BAD_PATHWAY	23	0.561811	1.46324	0.0597572	0.200483	1	1519	tags=26%, list=8%, signal=28%
BIOCARTA_BARR_MAPK_PATHWAY	14	0.787326	1.81752	0	0.0166798	0.9845	913	tags=43%, list=5%, signal=45%
BIOCARTA_BARRESTIN_PATHWAY	11	0.710588	1.57683	0.0285442	0.110066	1	913	tags=36%, list=5%, signal=38%
BIOCARTA_BARRESTIN_SRC_PATHWAY	17	0.714158	1.73596	0.00371402	0.0359432	1	913	tags=35%, list=5%, signal=37%
BIOCARTA_BCELLSURVIVAL_PATHWAY	16	0.352595	0.851638	0.676552	0.864733	1	697	tags=13%, list=4%, signal=13%
BIOCARTA_BCR_PATHWAY	31	0.609656	1.70491	0.00284091	0.0449946	1	2323	tags=32%, list=12%, signal=37%
BIOCARTA_BIOPEPTIDES_PATHWAY	27	0.633771	1.73195	0.00477555	0.0370561	1	1262	tags=26%, list=7%, signal=28%
BIOCARTA_BLYMPHOCYTE_PATHWAY	8	0.564012	1.16184	0.312261	0.508513	1	3228	tags=38%, list=17%, signal=45%
BIOCARTA_BTG2_PATHWAY	9	0.480399	1.01955	0.458812	0.669341	1	701	tags=22%, list=4%, signal=23%
BIOCARTA_CACAM_PATHWAY	6	0.843315	1.57738	0.0166976	0.109866	1	2912	tags=83%, list=15%, signal=98%
BIOCARTA_CALCINEURIN_PATHWAY	17	0.579559	1.4301	0.0712928	0.232926	1	2912	tags=35%, list=15%, signal=41%
BIOCARTA_CARM1_PATHWAY	11	0.666836	1.4649	0.0579981	0.199018	1	2986	tags=55%, list=15%, signal=64%
BIOCARTA_CASPASE_PATHWAY	20	0.554778	1.4166	0.0801887	0.246383	1	3132	tags=30%, list=16%, signal=36%
BIOCARTA_CBL_PATHWAY	11	0.438832	0.966943	0.515406	0.736971	1	2104	tags=27%, list=11%, signal=31%
BIOCARTA_CCR3_PATHWAY	16	0.719112	1.74181	0.00364631	0.0340837	1	941	tags=50%, list=5%, signal=53%
BIOCARTA_CCR5_PATHWAY	14	0.785997	1.85173	0.00479846	0.0114222	0.8825	1658	tags=50%, list=9%, signal=55%
BIOCARTA_CD40_PATHWAY	13	0.47877	1.10927	0.335945	0.565354	1	4929	tags=46%, list=25%, signal=62%
BIOCARTA_CDC25_PATHWAY	8	0.650492	1.32907	0.15279	0.330229	1	3999	tags=50%, list=21%, signal=63%
BIOCARTA_CDC42RAC_PATHWAY	7	0.493103	0.971818	0.523185	0.729845	1	4729	tags=43%, list=24%, signal=57%
BIOCARTA_CDK5_PATHWAY	11	0.556327	1.22542	0.234637	0.434515	1	876	tags=27%, list=5%, signal=29%
BIOCARTA_CDMAC_PATHWAY	14	0.753018	1.76753	0.00275229	0.0266767	1	1658	tags=50%, list=9%, signal=55%	EGF pathway
BIOCARTA_CERAMIDE_PATHWAY	22	0.536036	1.4012	0.101584	0.258107	1	736	tags=18%, list=4%, signal=19%
BIOCARTA_CFTR_PATHWAY	9	0.673045	1.41778	0.0821662	0.245215	1	2568	tags=44%, list=13%, signal=51%
BIOCARTA_CHEMICAL_PATHWAY	18	0.617519	1.54841	0.0317308	0.131575	1	1551	tags=28%, list=8%, signal=30%
BIOCARTA_CHREBP_PATHWAY	9	0.63795	1.35298	0.13619	0.305674	1	2568	tags=44%, list=13%, signal=51%
BIOCARTA_CIRCADIAN_PATHWAY	6	0.816745	1.56057	0.0191388	0.122335	1	2809	tags=67%, list=14%, signal=78%
BIOCARTA_CK1_PATHWAY	15	0.752112	1.79086	0.00187091	0.0214785	0.998	2568	tags=47%, list=13%, signal=54%
BIOCARTA_CPSF_PATHWAY	6	0.583199	1.10778	0.357208	0.566876	1	2358	tags=33%, list=12%, signal=38%
BIOCARTA_CREB_PATHWAY	20	0.702374	1.80424	0.00189573	0.0193238	0.9935	1519	tags=40%, list=8%, signal=43%
BIOCARTA_CREM_PATHWAY	4	0.696293	1.2004	0.268456	0.46295	1	2827	tags=50%, list=15%, signal=59%
BIOCARTA_CSK_PATHWAY	12	0.652266	1.45204	0.0494767	0.209432	1	2568	tags=42%, list=13%, signal=48%
BIOCARTA_CTBP1_PATHWAY	7	0.46062	0.912192	0.575071	0.802364	1	6203	tags=86%, list=32%, signal=126%
BIOCARTA_CTCF_PATHWAY	23	0.189604	0.49375	0.994408	0.997182	1	4851	tags=26%, list=25%, signal=35%
BIOCARTA_CTL_PATHWAY	7	0.377486	0.75563	0.773346	0.938388	1	1380	tags=29%, list=7%, signal=31%
BIOCARTA_CTLA4_PATHWAY	9	0.473082	0.991463	0.48917	0.704597	1	964	tags=11%, list=5%, signal=12%
BIOCARTA_CXCR4_PATHWAY	19	0.730358	1.80663	0.00186393	0.0188721	0.993	1131	tags=37%, list=6%, signal=39%
BIOCARTA_D4GDI_PATHWAY	10	0.586451	1.26738	0.191388	0.392406	1	2352	tags=40%, list=12%, signal=45%
BIOCARTA_DEATH_PATHWAY	30	0.326004	0.917935	0.607477	0.795747	1	1551	tags=13%, list=8%, signal=14%
BIOCARTA_DNAFRAGMENT_PATHWAY	9	0.568912	1.20002	0.257036	0.463219	1	708	tags=11%, list=4%, signal=12%
BIOCARTA_DREAM_PATHWAY	12	0.819324	1.85136	0.000942507	0.0114417	0.885	2827	tags=83%, list=15%, signal=97%
BIOCARTA_DSP_PATHWAY	9	0.707085	1.49171	0.0360273	0.176312	1	1146	tags=33%, list=6%, signal=35%
BIOCARTA_ECM_PATHWAY	21	0.383426	0.998703	0.463645	0.696653	1	1091	tags=14%, list=6%, signal=15%
BIOCARTA_EDG1_PATHWAY	20	0.545571	1.39878	0.0869159	0.260352	1	605	tags=20%, list=3%, signal=21%
BIOCARTA_EFP_PATHWAY	13	0.354079	0.800305	0.748084	0.911131	1	4132	tags=31%, list=21%, signal=39%
BIOCARTA_EGF_PATHWAY	28	0.681804	1.8685	0	0.00950125	0.7985	2765	tags=39%, list=14%, signal=46%	EGF pathway
BIOCARTA_EGFR_SMRTE_PATHWAY	11	0.78858	1.7571	0.00187441	0.0294093	1	494	tags=27%, list=3%, signal=28%
BIOCARTA_EICOSANOID_PATHWAY	19	0.529998	1.33827	0.116071	0.321754	1	242	tags=11%, list=1%, signal=11%
BIOCARTA_EIF_PATHWAY	9	0.467012	0.985803	0.500935	0.711158	1	5731	tags=56%, list=30%, signal=79%
BIOCARTA_EIF2_PATHWAY	9	0.400081	0.831231	0.680451	0.88378	1	5196	tags=33%, list=27%, signal=46%
BIOCARTA_EIF4_PATHWAY	21	0.643855	1.64759	0.0128968	0.069275	1	2576	tags=38%, list=13%, signal=44%
BIOCARTA_EPO_PATHWAY	19	0.597612	1.51389	0.0542056	0.158644	1	2323	tags=32%, list=12%, signal=36%
BIOCARTA_ERAD_PATHWAY	14	0.434517	1.02376	0.448082	0.663829	1	24	tags=7%, list=0%, signal=7%
BIOCARTA_ERBB4_PATHWAY	7	0.815778	1.59472	0.0139405	0.0998285	1	605	tags=43%, list=3%, signal=44%
BIOCARTA_ERK_PATHWAY	25	0.41974	1.11317	0.313264	0.559813	1	1262	tags=16%, list=7%, signal=17%
BIOCARTA_ERK5_PATHWAY	14	0.419606	0.991009	0.465649	0.705105	1	528	tags=14%, list=3%, signal=15%
BIOCARTA_ETS_PATHWAY	17	0.471406	1.15462	0.28222	0.515258	1	2770	tags=29%, list=14%, signal=34%
BIOCARTA_FAS_PATHWAY	27	0.478335	1.31579	0.111637	0.343521	1	3505	tags=33%, list=18%, signal=41%
BIOCARTA_FBW7_PATHWAY	8	0.34186	0.696891	0.849341	0.964995	1	3630	tags=38%, list=19%, signal=46%
BIOCARTA_FCER1_PATHWAY	36	0.56129	1.62313	0.0085389	0.0824812	1	2912	tags=33%, list=15%, signal=39%
BIOCARTA_FMLP_PATHWAY	30	0.487025	1.35536	0.0894386	0.303257	1	3844	tags=37%, list=20%, signal=46%
BIOCARTA_FOSB_PATHWAY	5	0.734487	1.3401	0.138807	0.319773	1	1892	tags=40%, list=10%, signal=44%
BIOCARTA_G2_PATHWAY	22	0.262639	0.680331	0.89751	0.969642	1	3999	tags=32%, list=21%, signal=40%
BIOCARTA_GABA_PATHWAY	10	0.651931	1.40613	0.105916	0.253785	1	2651	tags=50%, list=14%, signal=58%
BIOCARTA_GATA3_PATHWAY	10	0.594579	1.27554	0.185291	0.384202	1	2568	tags=50%, list=13%, signal=58%
BIOCARTA_GH_PATHWAY	25	0.623568	1.68279	0.00962464	0.051977	1	1262	tags=20%, list=7%, signal=21%
BIOCARTA_GLEEVEC_PATHWAY	23	0.578708	1.52179	0.0296367	0.153124	1	1658	tags=22%, list=9%, signal=24%
BIOCARTA_GPCR_PATHWAY	28	0.711015	1.94957	0	0.0028662	0.264	2912	tags=57%, list=15%, signal=67%	EGF pathway
BIOCARTA_HBX_PATHWAY	7	0.640366	1.25971	0.200568	0.398583	1	1262	tags=43%, list=7%, signal=46%
BIOCARTA_HCMV_PATHWAY	17	0.552015	1.35648	0.113658	0.302048	1	528	tags=18%, list=3%, signal=18%
BIOCARTA_HDAC_PATHWAY	22	0.310102	0.808701	0.746198	0.903517	1	3999	tags=36%, list=21%, signal=46%
BIOCARTA_HER2_PATHWAY	22	0.436306	1.14739	0.284294	0.522665	1	1262	tags=18%, list=7%, signal=19%
BIOCARTA_HIVNEF_PATHWAY	52	0.363118	1.12489	0.266029	0.546372	1	2352	tags=19%, list=12%, signal=22%
BIOCARTA_HSP27_PATHWAY	12	0.359379	0.81427	0.723608	0.899054	1	1551	tags=17%, list=8%, signal=18%
BIOCARTA_HSWI_SNF_PATHWAY	10	0.601323	1.2957	0.164265	0.363926	1	1659	tags=20%, list=9%, signal=22%
BIOCARTA_IFNA_PATHWAY	7	0.714849	1.40771	0.0851466	0.253776	1	796	tags=14%, list=4%, signal=15%
BIOCARTA_IFNG_PATHWAY	5	0.82552	1.49114	0.0437811	0.176696	1	796	tags=20%, list=4%, signal=21%
BIOCARTA_IGF1_PATHWAY	22	0.677444	1.77785	0.0028626	0.0245848	0.9995	2323	tags=32%, list=12%, signal=36%
BIOCARTA_IGF1MTOR_PATHWAY	18	0.587384	1.46207	0.0566914	0.20161	1	1788	tags=28%, list=9%, signal=31%
BIOCARTA_IGF1R_PATHWAY	22	0.664859	1.71662	0.00841121	0.041465	1	1519	tags=27%, list=8%, signal=30%
BIOCARTA_IL10_PATHWAY	9	0.309827	0.656533	0.880976	0.976371	1	796	tags=11%, list=4%, signal=12%
BIOCARTA_IL12_PATHWAY	12	0.574218	1.29148	0.169953	0.368333	1	3844	tags=42%, list=20%, signal=52%
BIOCARTA_IL17_PATHWAY	4	0.509806	0.872526	0.668639	0.845615	1	825	tags=25%, list=4%, signal=26%
BIOCARTA_IL2_PATHWAY	22	0.690527	1.80377	0.000927644	0.0194275	0.994	2323	tags=36%, list=12%, signal=41%
BIOCARTA_IL22BP_PATHWAY	9	0.550757	1.14381	0.328139	0.525922	1	3819	tags=33%, list=20%, signal=41%
BIOCARTA_IL2RB_PATHWAY	35	0.459255	1.31948	0.103196	0.339862	1	2104	tags=23%, list=11%, signal=26%
BIOCARTA_IL3_PATHWAY	14	0.532237	1.25409	0.179191	0.405242	1	1262	tags=21%, list=7%, signal=23%
BIOCARTA_IL4_PATHWAY	10	0.537979	1.17133	0.274583	0.498927	1	1788	tags=20%, list=9%, signal=22%
BIOCARTA_IL6_PATHWAY	21	0.637055	1.63719	0.00740055	0.0745112	1	2323	tags=29%, list=12%, signal=32%
BIOCARTA_IL7_PATHWAY	15	0.6249	1.4849	0.0527778	0.182093	1	964	tags=27%, list=5%, signal=28%
BIOCARTA_INSULIN_PATHWAY	22	0.682166	1.76287	0.00189753	0.0278756	1	2323	tags=32%, list=12%, signal=36%
BIOCARTA_INTEGRIN_PATHWAY	33	0.398734	1.12495	0.287645	0.546645	1	1658	tags=18%, list=9%, signal=20%
BIOCARTA_ION_PATHWAY	5	0.917312	1.68292	0.000970874	0.0520568	1	605	tags=60%, list=3%, signal=62%
BIOCARTA_IRES_PATHWAY	6	0.756204	1.4235	0.0731022	0.238981	1	4556	tags=83%, list=23%, signal=109%
BIOCARTA_KERATINOCYTE_PATHWAY	43	0.513919	1.5201	0.0218424	0.154566	1	1658	tags=26%, list=9%, signal=28%
BIOCARTA_LIS1_PATHWAY	14	0.641906	1.49656	0.05145	0.172938	1	3349	tags=36%, list=17%, signal=43%
BIOCARTA_MAL_PATHWAY	17	0.48991	1.19	0.242964	0.475529	1	1091	tags=24%, list=6%, signal=25%
BIOCARTA_MAPK_PATHWAY	76	0.409879	1.35889	0.0423729	0.299693	1	2323	tags=21%, list=12%, signal=24%
BIOCARTA_MCALPAIN_PATHWAY	18	0.400145	1.0019	0.461896	0.693093	1	1519	tags=17%, list=8%, signal=18%
BIOCARTA_MCM_PATHWAY	13	0.462712	1.0689	0.372049	0.610382	1	3319	tags=31%, list=17%, signal=37%
BIOCARTA_MEF2D_PATHWAY	15	0.606099	1.4502	0.0661626	0.210931	1	3368	tags=60%, list=17%, signal=73%
BIOCARTA_MELANOCYTE_PATHWAY	7	0.652857	1.29564	0.16589	0.36391	1	825	tags=43%, list=4%, signal=45%
BIOCARTA_MET_PATHWAY	33	0.473924	1.35113	0.0935673	0.307648	1	1658	tags=30%, list=9%, signal=33%
BIOCARTA_MITOCHONDRIA_PATHWAY	19	0.492544	1.24407	0.187266	0.414493	1	1551	tags=16%, list=8%, signal=17%
BIOCARTA_MPR_PATHWAY	18	0.717853	1.78923	0.00094697	0.0219586	0.998	2926	tags=50%, list=15%, signal=59%
BIOCARTA_MTOR_PATHWAY	19	0.569875	1.4624	0.0562852	0.201437	1	3496	tags=42%, list=18%, signal=51%
BIOCARTA_NDKDYNAMIN_PATHWAY	13	0.513457	1.17313	0.272894	0.496282	1	913	tags=23%, list=5%, signal=24%
BIOCARTA_NFAT_PATHWAY	41	0.600956	1.77142	0	0.0260632	1	2007	tags=34%, list=10%, signal=38%
BIOCARTA_NGF_PATHWAY	19	0.563368	1.40615	0.0890995	0.253889	1	2323	tags=32%, list=12%, signal=36%
BIOCARTA_NKCELLS_PATHWAY	15	0.581221	1.37532	0.104745	0.284824	1	50	tags=13%, list=0%, signal=13%
BIOCARTA_NOS1_PATHWAY	19	0.662525	1.68286	0.00942507	0.0520185	1	3193	tags=53%, list=16%, signal=63%
BIOCARTA_NTHI_PATHWAY	20	0.420439	1.07586	0.36236	0.604123	1	3844	tags=40%, list=20%, signal=50%
BIOCARTA_P35ALZHEIMERS_PATHWAY	6	0.493346	0.929856	0.574488	0.78358	1	1593	tags=33%, list=8%, signal=36%
BIOCARTA_P38MAPK_PATHWAY	32	0.305141	0.852548	0.704762	0.864404	1	3267	tags=25%, list=17%, signal=30%
BIOCARTA_PAR1_PATHWAY	17	0.55619	1.37234	0.100287	0.286704	1	941	tags=35%, list=5%, signal=37%
BIOCARTA_PDGF_PATHWAY	29	0.638495	1.7617	0.00276753	0.0281804	1	2765	tags=38%, list=14%, signal=44%
BIOCARTA_PELP1_PATHWAY	5	0.718785	1.3066	0.15562	0.352779	1	2986	tags=60%, list=15%, signal=71%
BIOCARTA_PGC1A_PATHWAY	13	0.426743	0.993432	0.486256	0.702723	1	1434	tags=23%, list=7%, signal=25%
BIOCARTA_PITX2_PATHWAY	13	0.287828	0.664191	0.883833	0.973667	1	4196	tags=31%, list=22%, signal=39%
BIOCARTA_PKC_PATHWAY	7	0.79154	1.56526	0.0252572	0.119019	1	941	tags=57%, list=5%, signal=60%
BIOCARTA_PLC_PATHWAY	9	0.779662	1.63083	0.0139535	0.0780488	1	605	tags=33%, list=3%, signal=34%
BIOCARTA_PLCD_PATHWAY	5	0.814833	1.47509	0.045539	0.191508	1	605	tags=40%, list=3%, signal=41%
BIOCARTA_PLCE_PATHWAY	11	0.691156	1.53017	0.0399619	0.146614	1	1519	tags=36%, list=8%, signal=39%
BIOCARTA_PPARG_PATHWAY	7	0.32691	0.6442	0.89434	0.979355	1	2986	tags=29%, list=15%, signal=34%
BIOCARTA_PRC2_PATHWAY	10	0.491496	1.06689	0.394495	0.613344	1	5120	tags=50%, list=26%, signal=68%
BIOCARTA_PS1_PATHWAY	12	0.480913	1.08669	0.379278	0.591339	1	1593	tags=17%, list=8%, signal=18%
BIOCARTA_PTC1_PATHWAY	11	0.568789	1.24432	0.216085	0.414394	1	3657	tags=45%, list=19%, signal=56%
BIOCARTA_PTDINS_PATHWAY	14	0.626948	1.473	0.0653595	0.1931	1	6100	tags=79%, list=31%, signal=115%
BIOCARTA_PTEN_PATHWAY	16	0.606816	1.4682	0.0575868	0.197344	1	1262	tags=25%, list=7%, signal=27%
BIOCARTA_PYK2_PATHWAY	25	0.664193	1.81141	0.0028436	0.0177709	0.9885	1658	tags=36%, list=9%, signal=39%
BIOCARTA_RAB_PATHWAY	11	0.410125	0.903953	0.58397	0.810478	1	6482	tags=36%, list=33%, signal=55%
BIOCARTA_RAC1_PATHWAY	21	0.511447	1.33758	0.110897	0.322049	1	1788	tags=29%, list=9%, signal=31%
BIOCARTA_RACCYCD_PATHWAY	25	0.293167	0.791326	0.781104	0.917482	1	3505	tags=20%, list=18%, signal=24%
BIOCARTA_RANBP2_PATHWAY	12	0.537497	1.2008	0.244976	0.462342	1	6203	tags=67%, list=32%, signal=98%
BIOCARTA_RANMS_PATHWAY	9	0.264569	0.562115	0.952015	0.990829	1	7236	tags=67%, list=37%, signal=106%
BIOCARTA_RB_PATHWAY	12	0.364115	0.818223	0.713748	0.895626	1	3999	tags=33%, list=21%, signal=42%
BIOCARTA_REELIN_PATHWAY	7	0.637851	1.26802	0.196814	0.391747	1	1074	tags=29%, list=6%, signal=30%
BIOCARTA_RHO_PATHWAY	20	0.37382	0.949788	0.535514	0.757697	1	1091	tags=20%, list=6%, signal=21%
BIOCARTA_SAM68_PATHWAY	6	0.607664	1.15105	0.323416	0.519183	1	1245	tags=33%, list=6%, signal=36%
BIOCARTA_SHH_PATHWAY	15	0.635218	1.51413	0.0328168	0.158537	1	2568	tags=33%, list=13%, signal=38%
BIOCARTA_SPRY_PATHWAY	16	0.646042	1.53414	0.0336364	0.143241	1	2104	tags=31%, list=11%, signal=35%
BIOCARTA_SRCRPTP_PATHWAY	10	0.601928	1.31668	0.146947	0.342992	1	2926	tags=40%, list=15%, signal=47%
BIOCARTA_STAT3_PATHWAY	8	0.699616	1.42456	0.0877026	0.23793	1	796	tags=25%, list=4%, signal=26%
BIOCARTA_STATHMIN_PATHWAY	15	0.703528	1.66111	0.0136852	0.0623811	1	2926	tags=53%, list=15%, signal=63%
BIOCARTA_STRESS_PATHWAY	23	0.326547	0.858054	0.672043	0.860174	1	3844	tags=35%, list=20%, signal=43%
BIOCARTA_SUMO_PATHWAY	6	0.630676	1.18939	0.282799	0.475499	1	6203	tags=83%, list=32%, signal=122%
BIOCARTA_TALL1_PATHWAY	13	0.283151	0.647927	0.906654	0.979182	1	357	tags=8%, list=2%, signal=8%
BIOCARTA_TCR_PATHWAY	37	0.585869	1.72535	0	0.0391244	1	2912	tags=38%, list=15%, signal=44%	EGF pathway
BIOCARTA_TCRA_PATHWAY	5	0.696244	1.27311	0.199038	0.386823	1	5372	tags=60%, list=28%, signal=83%
BIOCARTA_TCYTOTOXIC_PATHWAY	7	0.601733	1.1823	0.299048	0.484468	1	1380	tags=29%, list=7%, signal=31%
BIOCARTA_TEL_PATHWAY	17	0.471419	1.16216	0.260911	0.508333	1	736	tags=12%, list=4%, signal=12%
BIOCARTA_TERC_PATHWAY	6	0.594232	1.11911	0.357905	0.552578	1	7870	tags=100%, list=41%, signal=168%
BIOCARTA_TFF_PATHWAY	21	0.352933	0.910206	0.5796	0.804825	1	1551	tags=14%, list=8%, signal=16%
BIOCARTA_TGFB_PATHWAY	16	0.453119	1.08669	0.367173	0.591213	1	3393	tags=38%, list=17%, signal=45%
BIOCARTA_THELPER_PATHWAY	8	0.549995	1.11279	0.371205	0.560277	1	1380	tags=25%, list=7%, signal=27%
BIOCARTA_TNFR1_PATHWAY	27	0.45631	1.23059	0.198481	0.429121	1	3505	tags=33%, list=18%, signal=41%
BIOCARTA_TNFR2_PATHWAY	17	0.410366	1.00276	0.467666	0.692839	1	3369	tags=29%, list=17%, signal=36%
BIOCARTA_TOLL_PATHWAY	24	0.464785	1.22853	0.188878	0.432328	1	3844	tags=42%, list=20%, signal=52%
BIOCARTA_TPO_PATHWAY	25	0.672284	1.80457	0	0.0192991	0.9935	1658	tags=28%, list=9%, signal=31%
BIOCARTA_TRKA_PATHWAY	12	0.535032	1.21806	0.247059	0.44234	1	1262	tags=25%, list=7%, signal=27%
BIOCARTA_TSP1_PATHWAY	7	0.653847	1.28046	0.190883	0.379148	1	4817	tags=71%, list=25%, signal=95%
BIOCARTA_TUBBY_PATHWAY	5	0.951661	1.69594	0	0.0478056	1	941	tags=100%, list=5%, signal=105%
BIOCARTA_VDR_PATHWAY	22	0.523239	1.35504	0.110193	0.303598	1	2135	tags=32%, list=11%, signal=36%
BIOCARTA_VIP_PATHWAY	24	0.617606	1.64692	0.0103481	0.0696452	1	2912	tags=46%, list=15%, signal=54%
BIOCARTA_VITCB_PATHWAY	10	0.392474	0.851964	0.6287	0.864534	1	399	tags=10%, list=2%, signal=10%
BIOCARTA_WNT_PATHWAY	21	0.446079	1.13664	0.304519	0.533496	1	4196	tags=38%, list=22%, signal=49%
BRWD1_TARGET_GENES	244	0.275011	1.0724	0.264522	0.607548	1	3630	tags=23%, list=19%, signal=28%
CBX1_TARGET_GENES	6	0.41929	0.799148	0.746398	0.911629	1	3834	tags=50%, list=20%, signal=62%
CDYL_TARGET_GENES	8	0.644128	1.30998	0.152626	0.349762	1	1703	tags=50%, list=9%, signal=55%
CEBPG_TARGET_GENES	314	0.222963	0.890392	0.825664	0.826018	1	4435	tags=27%, list=23%, signal=35%
CGAS_TARGET_GENES	155	0.376068	1.38719	0.00989209	0.271437	1	2813	tags=28%, list=15%, signal=33%
DDX5_TARGET_GENES	41	0.258828	0.774738	0.822242	0.928911	1	1286	tags=12%, list=7%, signal=13%
DLX1_TARGET_GENES	273	0.239105	0.94102	0.653474	0.768913	1	2478	tags=16%, list=13%, signal=18%
DNAJC2_TARGET_GENES	38	0.343502	1.00819	0.421756	0.684319	1	2913	tags=21%, list=15%, signal=25%
DUXBL1_TARGET_GENES	172	0.224852	0.840914	0.87398	0.873905	1	4712	tags=29%, list=24%, signal=38%
DZIP3_TARGET_GENES	8	0.375137	0.764443	0.750247	0.934355	1	4610	tags=38%, list=24%, signal=49%
E4F1_TARGET_GENES	133	0.278047	1.00375	0.424434	0.691616	1	4672	tags=29%, list=24%, signal=37%
ELK3_TARGET_GENES	46	0.271749	0.828678	0.751423	0.885436	1	3666	tags=22%, list=19%, signal=27%
ELL_TARGET_GENES	482	0.217792	0.898344	0.841113	0.817182	1	2795	tags=16%, list=14%, signal=18%
FOXD3_TARGET_GENES	406	0.249662	1.01995	0.393514	0.668817	1	2148	tags=15%, list=11%, signal=17%
FOXN1_TARGET_GENES	413	0.278582	1.13776	0.114769	0.532837	1	2817	tags=19%, list=15%, signal=22%
GADD45A_TARGET_GENES	97	0.278673	0.95681	0.556398	0.748464	1	4196	tags=29%, list=22%, signal=37%
GLI1_TARGET_GENES	220	0.259633	0.996695	0.450262	0.699025	1	3509	tags=21%, list=18%, signal=26%
GM14401_TARGET_GENES	87	0.320094	1.08444	0.291423	0.593448	1	4092	tags=25%, list=21%, signal=32%
GM14410_TARGET_GENES	24	0.36137	0.975775	0.481552	0.723204	1	767	tags=17%, list=4%, signal=17%
GM14418_TARGET_GENES	13	0.292744	0.668834	0.878818	0.972896	1	3662	tags=23%, list=19%, signal=28%
GM14443_UNIPROT_A2ARX0_UNREVIEWED_TARGET_GENES	5	0.652231	1.17889	0.277778	0.489021	1	2424	tags=40%, list=13%, signal=46%
GOBP_3_UTR_MEDIATED_MRNA_DESTABILIZATION	16	0.3817	0.927781	0.554194	0.786206	1	5952	tags=50%, list=31%, signal=72%
GOBP_3_UTR_MEDIATED_MRNA_STABILIZATION	20	0.238533	0.595201	0.962247	0.986805	1	5889	tags=50%, list=30%, signal=72%
GOBP_5_PHOSPHORIBOSE_1_DIPHOSPHATE_METABOLIC_PROCESS	6	0.680279	1.29559	0.181132	0.363895	1	272	tags=17%, list=1%, signal=17%
GOBP_7_METHYLGUANOSINE_RNA_CAPPING	9	0.759653	1.60225	0.0236967	0.0951573	1	3694	tags=67%, list=19%, signal=82%
GOBP_ACETYL_COA_BIOSYNTHETIC_PROCESS_FROM_PYRUVATE	12	0.290459	0.649043	0.89763	0.978748	1	353	tags=8%, list=2%, signal=8%
GOBP_ACETYLCHOLINE_SECRETION	7	0.526186	1.03688	0.431539	0.647698	1	1850	tags=29%, list=10%, signal=32%
GOBP_ACID_SECRETION	37	0.493271	1.4373	0.0445269	0.224855	1	2113	tags=24%, list=11%, signal=27%
GOBP_ACIDIC_AMINO_ACID_TRANSPORT	65	0.291045	0.934465	0.577452	0.777116	1	1850	tags=22%, list=10%, signal=24%
GOBP_ACROSOMAL_VESICLE_EXOCYTOSIS	7	0.660402	1.32117	0.156882	0.338669	1	4739	tags=57%, list=24%, signal=76%
GOBP_ACROSOME_REACTION	24	0.344623	0.904737	0.613422	0.809763	1	2399	tags=21%, list=12%, signal=24%
GOBP_ACTIN_CROSSLINK_FORMATION	14	0.704939	1.63835	0.0121043	0.073958	1	2149	tags=29%, list=11%, signal=32%
GOBP_ACTIN_FILAMENT_BASED_MOVEMENT	120	0.29534	1.04514	0.351903	0.639162	1	3193	tags=32%, list=16%, signal=38%
GOBP_ACTIN_FILAMENT_BASED_TRANSPORT	21	0.37336	0.956544	0.521905	0.748947	1	844	tags=19%, list=4%, signal=20%
GOBP_ACTIN_FILAMENT_BUNDLE_ORGANIZATION	174	0.294025	1.10482	0.223035	0.57078	1	2565	tags=21%, list=13%, signal=24%
GOBP_ACTIN_FILAMENT_DEPOLYMERIZATION	54	0.323376	1.01089	0.430605	0.681415	1	2565	tags=19%, list=13%, signal=21%
GOBP_ACTIN_FILAMENT_NETWORK_FORMATION	11	0.422349	0.934802	0.560861	0.776754	1	2271	tags=36%, list=12%, signal=41%
GOBP_ACTIN_MEDIATED_CELL_CONTRACTION	92	0.322909	1.10452	0.250239	0.570645	1	3193	tags=35%, list=16%, signal=41%
GOBP_ACTIN_MYOSIN_FILAMENT_SLIDING	9	0.581376	1.21723	0.240494	0.4436	1	2149	tags=44%, list=11%, signal=50%
GOBP_ACTIN_NUCLEATION	55	0.454297	1.42305	0.0450281	0.239674	1	2271	tags=27%, list=12%, signal=31%
GOBP_ACTIN_POLYMERIZATION_OR_DEPOLYMERIZATION	175	0.358779	1.33447	0.0296846	0.325025	1	2565	tags=22%, list=13%, signal=25%
GOBP_ACTION_POTENTIAL	146	0.373498	1.36145	0.0253046	0.298217	1	3069	tags=35%, list=16%, signal=41%	synaptic transmission
GOBP_ACTION_POTENTIAL_INITIATION	5	0.656945	1.20783	0.275829	0.454202	1	1413	tags=40%, list=7%, signal=43%
GOBP_ACTIVATION_OF_ADENYLATE_CYCLASE_ACTIVITY	19	0.338949	0.858387	0.666362	0.859818	1	3205	tags=26%, list=17%, signal=31%
GOBP_ACTIVATION_OF_CYSTEINE_TYPE_ENDOPEPTIDASE_ACTIVITY_INVOLVED_IN_APOPTOTIC_PROCESS_BY_CYTOCHROME_C	6	0.452116	0.863668	0.638809	0.854298	1	2832	tags=33%, list=15%, signal=39%
GOBP_ACTIVATION_OF_GTPASE_ACTIVITY	94	0.394836	1.36348	0.0478424	0.295899	1	2982	tags=28%, list=15%, signal=33%
GOBP_ACTIVATION_OF_INNATE_IMMUNE_RESPONSE	228	0.250133	0.966177	0.558798	0.738066	1	4357	tags=25%, list=22%, signal=32%
GOBP_ACTIVATION_OF_JANUS_KINASE_ACTIVITY	11	0.480019	1.04446	0.418269	0.639372	1	3212	tags=36%, list=17%, signal=44%
GOBP_ACTIVATION_OF_MEIOSIS	6	0.611683	1.17059	0.306102	0.499184	1	2713	tags=33%, list=14%, signal=39%
GOBP_ACTIVATION_OF_PHOSPHOLIPASE_C_ACTIVITY	15	0.378779	0.904042	0.594313	0.810841	1	941	tags=20%, list=5%, signal=21%
GOBP_ACTIVATION_OF_PHOSPHOLIPASE_D_ACTIVITY	7	0.287928	0.571989	0.929171	0.989312	1	5717	tags=57%, list=29%, signal=81%
GOBP_ACTIVATION_OF_PROTEIN_KINASE_ACTIVITY	82	0.241354	0.809507	0.849574	0.903083	1	3267	tags=20%, list=17%, signal=23%
GOBP_ACTIVATION_OF_PROTEIN_KINASE_B_ACTIVITY	21	0.380559	0.963369	0.513823	0.741627	1	2396	tags=24%, list=12%, signal=27%
GOBP_ACTIVATION_OF_STORE_OPERATED_CALCIUM_CHANNEL_ACTIVITY	6	0.524332	0.989828	0.487305	0.70622	1	4368	tags=50%, list=23%, signal=65%
GOBP_ACTIVATION_OF_TRANSMEMBRANE_RECEPTOR_PROTEIN_TYROSINE_KINASE_ACTIVITY	5	0.685268	1.22704	0.251407	0.433332	1	4801	tags=60%, list=25%, signal=80%
GOBP_ACTIVIN_RECEPTOR_SIGNALING_PATHWAY	39	0.308364	0.913852	0.605058	0.800798	1	4132	tags=33%, list=21%, signal=42%
GOBP_ACUTE_PHASE_RESPONSE	21	0.40132	1.03923	0.383764	0.644919	1	894	tags=10%, list=5%, signal=10%
GOBP_ACYLGLYCEROL_HOMEOSTASIS	24	0.389692	1.04217	0.404398	0.641389	1	1910	tags=17%, list=10%, signal=18%
GOBP_ADAPTATION_OF_SIGNALING_PATHWAY	30	0.396361	1.10943	0.303403	0.565128	1	3055	tags=30%, list=16%, signal=36%
GOBP_ADENOSINE_TO_INOSINE_EDITING	5	0.633394	1.1441	0.334601	0.525685	1	1419	tags=20%, list=7%, signal=22%
GOBP_ADENYLATE_CYCLASE_ACTIVATING_ADRENERGIC_RECEPTOR_SIGNALING_PATHWAY	26	0.460134	1.23632	0.194829	0.423759	1	300	tags=19%, list=2%, signal=20%
GOBP_ADENYLATE_CYCLASE_ACTIVATING_DOPAMINE_RECEPTOR_SIGNALING_PATHWAY	9	0.72914	1.52582	0.0418994	0.150111	1	705	tags=44%, list=4%, signal=46%
GOBP_ADENYLATE_CYCLASE_ACTIVATING_G_PROTEIN_COUPLED_RECEPTOR_SIGNALING_PATHWAY	130	0.284165	1.02844	0.371841	0.657978	1	3205	tags=25%, list=17%, signal=30%
GOBP_ADENYLATE_CYCLASE_INHIBITING_DOPAMINE_RECEPTOR_SIGNALING_PATHWAY	6	0.75189	1.42943	0.0882918	0.233407	1	1801	tags=33%, list=9%, signal=37%
GOBP_ADENYLATE_CYCLASE_INHIBITING_G_PROTEIN_COUPLED_ACETYLCHOLINE_RECEPTOR_SIGNALING_PATHWAY	7	0.646014	1.26792	0.196154	0.391827	1	3607	tags=71%, list=19%, signal=88%
GOBP_ADENYLATE_CYCLASE_INHIBITING_G_PROTEIN_COUPLED_RECEPTOR_SIGNALING_PATHWAY	65	0.433022	1.40103	0.0373066	0.258129	1	3110	tags=35%, list=16%, signal=42%
GOBP_ADENYLATE_CYCLASE_INHIBITING_SEROTONIN_RECEPTOR_SIGNALING_PATHWAY	7	0.780753	1.5269	0.0389734	0.149193	1	230	tags=29%, list=1%, signal=29%
GOBP_ADENYLATE_CYCLASE_MODULATING_G_PROTEIN_COUPLED_RECEPTOR_SIGNALING_PATHWAY	196	0.293197	1.10965	0.209239	0.565025	1	3205	tags=27%, list=17%, signal=32%
GOBP_ADHERENS_JUNCTION_ORGANIZATION	54	0.472633	1.49037	0.0198864	0.177588	1	2404	tags=35%, list=12%, signal=40%
GOBP_ADHESION_OF_SYMBIONT_TO_HOST	11	0.367245	0.808137	0.724806	0.903441	1	1910	tags=27%, list=10%, signal=30%
GOBP_ADRENAL_GLAND_DEVELOPMENT	21	0.356969	0.903855	0.606268	0.810555	1	2146	tags=14%, list=11%, signal=16%
GOBP_ADRENERGIC_RECEPTOR_SIGNALING_PATHWAY	32	0.45989	1.30476	0.111426	0.354721	1	3193	tags=41%, list=16%, signal=49%
GOBP_ADULT_BEHAVIOR	170	0.375363	1.39837	0.0124888	0.2607	1	2823	tags=29%, list=15%, signal=34%
GOBP_ADULT_FEEDING_BEHAVIOR	4	0.745977	1.27429	0.181731	0.385981	1	607	tags=50%, list=3%, signal=52%
GOBP_AGGRESSIVE_BEHAVIOR	9	0.397674	0.845303	0.676894	0.870251	1	5095	tags=56%, list=26%, signal=75%
GOBP_AIM2_INFLAMMASOME_COMPLEX_ASSEMBLY	6	0.541826	1.02211	0.458058	0.665931	1	4357	tags=33%, list=22%, signal=43%
GOBP_ALANINE_TRANSPORT	14	0.409241	0.965698	0.525048	0.738633	1	1713	tags=29%, list=9%, signal=31%
GOBP_ALDITOL_PHOSPHATE_METABOLIC_PROCESS	12	0.528311	1.20297	0.261611	0.459652	1	1866	tags=17%, list=10%, signal=18%
GOBP_ALLANTOIN_METABOLIC_PROCESS	11	0.54025	1.19579	0.267364	0.468722	1	3392	tags=45%, list=17%, signal=55%
GOBP_ALPHA_BETA_T_CELL_LINEAGE_COMMITMENT	17	0.439065	1.06481	0.378817	0.615618	1	1797	tags=24%, list=9%, signal=26%
GOBP_ALPHA_TUBULIN_ACETYLATION	5	0.37808	0.689334	0.836755	0.966905	1	3648	tags=40%, list=19%, signal=49%
GOBP_ALTERNATIVE_MRNA_SPLICING_VIA_SPLICEOSOME	73	0.409446	1.35043	0.0630373	0.308579	1	4723	tags=40%, list=24%, signal=52%
GOBP_AMIDE_CATABOLIC_PROCESS	18	0.395234	0.975058	0.486842	0.724437	1	1399	tags=17%, list=7%, signal=18%
GOBP_AMIDE_TRANSPORT	358	0.321716	1.29287	0.0186335	0.366839	1	1950	tags=19%, list=10%, signal=21%
GOBP_AMINE_CATABOLIC_PROCESS	11	0.489809	1.07255	0.392823	0.607462	1	210	tags=9%, list=1%, signal=9%
GOBP_AMINE_TRANSPORT	116	0.373037	1.32295	0.0355515	0.336988	1	1950	tags=21%, list=10%, signal=23%
GOBP_AMINO_ACID_ACTIVATION	44	0.312768	0.946509	0.535171	0.761988	1	3739	tags=23%, list=19%, signal=28%
GOBP_AMINO_SUGAR_BIOSYNTHETIC_PROCESS	8	0.482674	0.977313	0.516772	0.720813	1	4021	tags=38%, list=21%, signal=47%
GOBP_AMINO_SUGAR_METABOLIC_PROCESS	41	0.299441	0.883745	0.652845	0.833827	1	2465	tags=15%, list=13%, signal=17%
GOBP_AMINOGLYCAN_BIOSYNTHETIC_PROCESS	57	0.358656	1.13226	0.252311	0.537468	1	2759	tags=19%, list=14%, signal=22%
GOBP_AMINOGLYCAN_METABOLIC_PROCESS	99	0.258701	0.894693	0.682495	0.820954	1	2915	tags=18%, list=15%, signal=21%
GOBP_AMP_CATABOLIC_PROCESS	8	0.425041	0.863867	0.646398	0.854053	1	2790	tags=50%, list=14%, signal=58%
GOBP_AMPA_GLUTAMATE_RECEPTOR_CLUSTERING	14	0.565522	1.33904	0.126787	0.321319	1	4516	tags=71%, list=23%, signal=93%
GOBP_AMYLOID_BETA_METABOLIC_PROCESS	53	0.363353	1.13465	0.237548	0.534476	1	1606	tags=23%, list=8%, signal=25%
GOBP_AMYLOID_PRECURSOR_PROTEIN_CATABOLIC_PROCESS	57	0.352519	1.11702	0.272031	0.554795	1	1480	tags=19%, list=8%, signal=21%
GOBP_ANAGEN	13	0.490196	1.12714	0.325336	0.543956	1	3	tags=8%, list=0%, signal=8%
GOBP_ANAPHASE_PROMOTING_COMPLEX_DEPENDENT_CATABOLIC_PROCESS	17	0.366022	0.926759	0.554464	0.78768	1	7439	tags=53%, list=38%, signal=86%
GOBP_ANATOMICAL_STRUCTURE_ARRANGEMENT	18	0.638131	1.58396	0.0276718	0.106246	1	2552	tags=39%, list=13%, signal=45%
GOBP_ANDROGEN_BIOSYNTHETIC_PROCESS	4	0.546326	0.935455	0.594106	0.775968	1	1910	tags=50%, list=10%, signal=55%
GOBP_ANDROGEN_RECEPTOR_SIGNALING_PATHWAY	40	0.361822	1.06444	0.351782	0.615949	1	3938	tags=35%, list=20%, signal=44%
GOBP_ANIMAL_ORGAN_FORMATION	56	0.335352	1.05321	0.370583	0.628889	1	1834	tags=18%, list=9%, signal=20%
GOBP_ANIMAL_ORGAN_MATURATION	29	0.3807	1.05646	0.368768	0.625183	1	925	tags=17%, list=5%, signal=18%
GOBP_ANOIKIS	29	0.457557	1.26523	0.14678	0.394473	1	3267	tags=31%, list=17%, signal=37%
GOBP_ANTERIOR_COMMISSURE_MORPHOGENESIS	8	0.700758	1.42265	0.0790244	0.240107	1	1785	tags=38%, list=9%, signal=41%
GOBP_ANTERIOR_POSTERIOR_PATTERN_SPECIFICATION	175	0.306179	1.14188	0.17122	0.527843	1	4023	tags=26%, list=21%, signal=33%
GOBP_ANTEROGRADE_AXONAL_PROTEIN_TRANSPORT	9	0.472044	0.989084	0.49031	0.70674	1	1379	tags=33%, list=7%, signal=36%
GOBP_ANTEROGRADE_AXONAL_TRANSPORT	52	0.383667	1.18112	0.202226	0.485557	1	3243	tags=33%, list=17%, signal=39%
GOBP_ANTEROGRADE_AXONAL_TRANSPORT_OF_MITOCHONDRION	6	0.543735	1.02822	0.445328	0.658077	1	888	tags=33%, list=5%, signal=35%
GOBP_ANTIFUNGAL_HUMORAL_RESPONSE	7	0.591369	1.17342	0.291908	0.495771	1	2349	tags=29%, list=12%, signal=32%
GOBP_ANTIFUNGAL_INNATE_IMMUNE_RESPONSE	16	0.349487	0.847321	0.667904	0.868877	1	1708	tags=13%, list=9%, signal=14%
GOBP_APICAL_CONSTRICTION	5	0.67881	1.24454	0.21735	0.414055	1	2127	tags=40%, list=11%, signal=45%
GOBP_APICAL_PROTEIN_LOCALIZATION	14	0.31651	0.756071	0.80463	0.938127	1	3279	tags=29%, list=17%, signal=34%
GOBP_APOPTOTIC_CHROMOSOME_CONDENSATION	6	0.326851	0.620364	0.887524	0.984386	1	7800	tags=83%, list=40%, signal=139%
GOBP_APOPTOTIC_DNA_FRAGMENTATION	15	0.350552	0.827574	0.710575	0.886487	1	4248	tags=27%, list=22%, signal=34%
GOBP_APOPTOTIC_MITOCHONDRIAL_CHANGES	114	0.266503	0.934129	0.607401	0.777335	1	2029	tags=12%, list=10%, signal=14%
GOBP_APOPTOTIC_PROCESS_INVOLVED_IN_HEART_MORPHOGENESIS	4	0.453047	0.779655	0.74686	0.926307	1	1016	tags=25%, list=5%, signal=26%
GOBP_APPENDAGE_MORPHOGENESIS	151	0.283912	1.03586	0.365421	0.648471	1	4118	tags=31%, list=21%, signal=39%
GOBP_ARACHIDONIC_ACID_SECRETION	25	0.363562	0.979652	0.492137	0.717674	1	3607	tags=32%, list=19%, signal=39%
GOBP_ARF_PROTEIN_SIGNAL_TRANSDUCTION	20	0.388023	0.992497	0.470757	0.703268	1	2893	tags=25%, list=15%, signal=29%
GOBP_AROMATIC_AMINO_ACID_TRANSPORT	11	0.444082	0.994075	0.478058	0.702059	1	1713	tags=18%, list=9%, signal=20%
GOBP_ARP2_3_COMPLEX_MEDIATED_ACTIN_NUCLEATION	43	0.558443	1.68203	0.00575816	0.0521452	1	4392	tags=44%, list=23%, signal=57%
GOBP_ASSOCIATIVE_LEARNING	115	0.437344	1.54859	0.00365297	0.131693	1	2911	tags=29%, list=15%, signal=34%	associative learning
GOBP_ASTRAL_MICROTUBULE_ORGANIZATION	13	0.718378	1.63112	0.0158434	0.0779911	1	2600	tags=46%, list=13%, signal=53%
GOBP_ASTROCYTE_CELL_MIGRATION	8	0.31681	0.640526	0.908571	0.979854	1	870	tags=13%, list=4%, signal=13%
GOBP_ASYMMETRIC_CELL_DIVISION	19	0.495136	1.24467	0.190207	0.414175	1	2060	tags=32%, list=11%, signal=35%
GOBP_ASYMMETRIC_NEUROBLAST_DIVISION	6	0.30838	0.57889	0.927509	0.988725	1	6041	tags=50%, list=31%, signal=73%
GOBP_ASYMMETRIC_STEM_CELL_DIVISION	4	0.778431	1.34868	0.123911	0.310489	1	1223	tags=50%, list=6%, signal=53%
GOBP_ATRIAL_CARDIAC_MUSCLE_CELL_MEMBRANE_REPOLARIZATION	8	0.651289	1.32062	0.1322	0.33897	1	1801	tags=38%, list=9%, signal=41%
GOBP_ATRIAL_CARDIAC_MUSCLE_CELL_TO_AV_NODE_CELL_COMMUNICATION	15	0.671212	1.59063	0.0203488	0.102514	1	2725	tags=47%, list=14%, signal=54%
GOBP_ATRIAL_CARDIAC_MUSCLE_TISSUE_DEVELOPMENT	13	0.269554	0.623148	0.914313	0.983974	1	2149	tags=15%, list=11%, signal=17%
GOBP_ATRIAL_CARDIAC_MUSCLE_TISSUE_MORPHOGENESIS	5	0.426354	0.769098	0.749027	0.932366	1	2149	tags=40%, list=11%, signal=45%
GOBP_ATRIAL_SEPTUM_DEVELOPMENT	19	0.28906	0.731647	0.836697	0.950854	1	7475	tags=63%, list=39%, signal=103%
GOBP_ATRIAL_SEPTUM_MORPHOGENESIS	12	0.318498	0.723598	0.815741	0.95427	1	5847	tags=50%, list=30%, signal=72%
GOBP_ATRIAL_SEPTUM_PRIMUM_MORPHOGENESIS	4	0.466863	0.795299	0.737247	0.914177	1	7475	tags=75%, list=39%, signal=122%
GOBP_ATRIOVENTRICULAR_VALVE_DEVELOPMENT	26	0.226438	0.61163	0.95493	0.985608	1	1016	tags=8%, list=5%, signal=8%
GOBP_ATRIOVENTRICULAR_VALVE_FORMATION	7	0.249767	0.492088	0.978887	0.997228	1	3750	tags=29%, list=19%, signal=35%
GOBP_AUDITORY_BEHAVIOR	13	0.617422	1.41149	0.0846512	0.250261	1	5939	tags=69%, list=31%, signal=100%
GOBP_AUTOCRINE_SIGNALING	5	0.542598	0.985338	0.515435	0.711163	1	1450	tags=20%, list=7%, signal=22%
GOBP_AUTOPHAGOSOME_LYSOSOME_FUSION	9	0.519366	1.0887	0.379179	0.588205	1	1544	tags=33%, list=8%, signal=36%
GOBP_AUTOPHAGOSOME_MATURATION	54	0.269529	0.844516	0.75164	0.87058	1	5052	tags=37%, list=26%, signal=50%
GOBP_AUTOPHAGY_OF_PEROXISOME	8	0.475492	0.97183	0.512008	0.729953	1	4039	tags=38%, list=21%, signal=47%
GOBP_AV_NODE_CELL_TO_BUNDLE_OF_HIS_CELL_COMMUNICATION	13	0.5713	1.31042	0.142857	0.349676	1	3276	tags=54%, list=17%, signal=65%
GOBP_AV_NODE_CELL_TO_BUNDLE_OF_HIS_CELL_SIGNALING	11	0.705917	1.54675	0.0303318	0.133123	1	3276	tags=64%, list=17%, signal=77%
GOBP_AXIS_SPECIFICATION	86	0.292199	0.980497	0.48423	0.716928	1	3930	tags=24%, list=20%, signal=30%
GOBP_AXO_DENDRITIC_PROTEIN_TRANSPORT	11	0.522795	1.16594	0.285435	0.504615	1	2240	tags=45%, list=12%, signal=51%
GOBP_AXO_DENDRITIC_TRANSPORT	86	0.406871	1.37534	0.0452931	0.28493	1	3349	tags=35%, list=17%, signal=42%
GOBP_AXON_CHOICE_POINT_RECOGNITION	7	0.477124	0.944208	0.552309	0.764614	1	2225	tags=43%, list=11%, signal=48%
GOBP_AXON_EXTENSION	136	0.378952	1.38001	0.0292772	0.279741	1	3042	tags=31%, list=16%, signal=36%
GOBP_AXON_EXTENSION_INVOLVED_IN_REGENERATION	5	0.739052	1.33681	0.124145	0.322584	1	2396	tags=60%, list=12%, signal=68%
GOBP_AXON_GUIDANCE	223	0.351785	1.35435	0.0117647	0.30438	1	2543	tags=26%, list=13%, signal=30%
GOBP_AXON_MIDLINE_CHOICE_POINT_RECOGNITION	5	0.82106	1.48103	0.0360624	0.185284	1	2225	tags=60%, list=11%, signal=68%
GOBP_AXONAL_FASCICULATION	24	0.329324	0.872577	0.64318	0.845789	1	3213	tags=25%, list=17%, signal=30%
GOBP_AXONAL_TRANSPORT	66	0.408827	1.31729	0.0673624	0.342343	1	3349	tags=36%, list=17%, signal=44%
GOBP_AXONAL_TRANSPORT_OF_MITOCHONDRION	16	0.515703	1.24821	0.210728	0.410563	1	3185	tags=50%, list=16%, signal=60%
GOBP_AXONEMAL_DYNEIN_COMPLEX_ASSEMBLY	36	0.450664	1.30333	0.105023	0.355713	1	4991	tags=39%, list=26%, signal=52%
GOBP_AXONEME_ASSEMBLY	91	0.443944	1.51898	0.0108696	0.155028	1	4439	tags=38%, list=23%, signal=50%	motile cilium movement cerebrospinal
GOBP_AXONOGENESIS_INVOLVED_IN_INNERVATION	11	0.460389	1.02234	0.443739	0.665794	1	4459	tags=45%, list=23%, signal=59%
GOBP_B_1_B_CELL_HOMEOSTASIS	6	0.404195	0.761846	0.77877	0.936269	1	3140	tags=50%, list=16%, signal=60%
GOBP_B_CELL_ACTIVATION	242	0.213565	0.823095	0.936494	0.890598	1	3945	tags=21%, list=20%, signal=27%
GOBP_B_CELL_ACTIVATION_INVOLVED_IN_IMMUNE_RESPONSE	76	0.342033	1.14578	0.216015	0.524243	1	3355	tags=25%, list=17%, signal=30%
GOBP_B_CELL_APOPTOTIC_PROCESS	25	0.488534	1.28788	0.148776	0.372036	1	1478	tags=20%, list=8%, signal=22%
GOBP_B_CELL_CHEMOTAXIS	5	0.750308	1.36596	0.111855	0.292731	1	994	tags=40%, list=5%, signal=42%
GOBP_B_CELL_DIFFERENTIATION	128	0.212957	0.766079	0.952074	0.933228	1	3945	tags=21%, list=20%, signal=26%
GOBP_B_CELL_HOMEOSTASIS	40	0.277397	0.819292	0.766382	0.894561	1	3140	tags=25%, list=16%, signal=30%
GOBP_B_CELL_LINEAGE_COMMITMENT	5	0.599637	1.09388	0.395573	0.582751	1	736	tags=20%, list=4%, signal=21%
GOBP_B_CELL_PROLIFERATION	75	0.260094	0.860251	0.744485	0.858725	1	3382	tags=20%, list=17%, signal=24%
GOBP_B_CELL_PROLIFERATION_INVOLVED_IN_IMMUNE_RESPONSE	4	0.53736	0.918801	0.586832	0.795188	1	6496	tags=75%, list=34%, signal=113%
GOBP_B_CELL_RECEPTOR_SIGNALING_PATHWAY	47	0.365483	1.11018	0.283144	0.564206	1	2007	tags=17%, list=10%, signal=19%
GOBP_BARBED_END_ACTIN_FILAMENT_CAPPING	26	0.339689	0.923062	0.579412	0.79185	1	207	tags=8%, list=1%, signal=8%
GOBP_BASE_CONVERSION_OR_SUBSTITUTION_EDITING	8	0.432181	0.892614	0.610487	0.82368	1	1419	tags=13%, list=7%, signal=13%
GOBP_BASOLATERAL_PROTEIN_SECRETION	5	0.419545	0.763396	0.759734	0.934719	1	3712	tags=40%, list=19%, signal=49%
GOBP_BEHAVIORAL_RESPONSE_TO_COCAINE	20	0.757186	1.92823	0	0.00409318	0.3805	3193	tags=60%, list=16%, signal=72%
GOBP_BEHAVIORAL_RESPONSE_TO_ETHANOL	11	0.765648	1.7111	0.00962464	0.0431916	1	1182	tags=36%, list=6%, signal=39%
GOBP_BEHAVIORAL_RESPONSE_TO_NICOTINE	10	0.567769	1.21951	0.219512	0.44111	1	5265	tags=50%, list=27%, signal=69%
GOBP_BEHAVIORAL_RESPONSE_TO_PAIN	27	0.353673	0.959762	0.530459	0.744795	1	2550	tags=19%, list=13%, signal=21%
GOBP_BILE_ACID_SECRETION	4	0.330964	0.567355	0.949763	0.989926	1	2113	tags=25%, list=11%, signal=28%
GOBP_BIOLOGICAL_PROCESS_INVOLVED_IN_INTRASPECIES_INTERACTION_BETWEEN_ORGANISMS	58	0.491828	1.55902	0.0110701	0.123337	1	3846	tags=43%, list=20%, signal=54%
GOBP_BLASTOCYST_DEVELOPMENT	134	0.231559	0.838024	0.846715	0.876422	1	3663	tags=22%, list=19%, signal=26%
GOBP_BLASTOCYST_FORMATION	50	0.333336	1.03205	0.415709	0.653147	1	3466	tags=28%, list=18%, signal=34%
GOBP_BLASTOCYST_GROWTH	28	0.272292	0.743278	0.858499	0.945631	1	4924	tags=39%, list=25%, signal=53%
GOBP_BLASTODERM_SEGMENTATION	27	0.310384	0.84429	0.710832	0.870589	1	1912	tags=15%, list=10%, signal=16%
GOBP_BLOOD_COAGULATION_INTRINSIC_PATHWAY	6	0.300952	0.567904	0.937183	0.989996	1	1801	tags=17%, list=9%, signal=18%
GOBP_BLOOD_VESSEL_ENDOTHELIAL_CELL_MIGRATION	118	0.288897	1.03468	0.373175	0.64974	1	459	tags=8%, list=2%, signal=8%
GOBP_BONE_MATURATION	27	0.388991	1.06032	0.377395	0.619949	1	925	tags=19%, list=5%, signal=19%
GOBP_BONE_MINERALIZATION	116	0.273247	0.96186	0.549734	0.742105	1	2146	tags=16%, list=11%, signal=17%
GOBP_BONE_MINERALIZATION_INVOLVED_IN_BONE_MATURATION	12	0.252085	0.571125	0.951429	0.989357	1	4770	tags=33%, list=25%, signal=44%
GOBP_BOX_C_D_SNORNP_ASSEMBLY	10	0.212367	0.455875	0.986842	0.999487	1	1889	tags=10%, list=10%, signal=11%
GOBP_BRADYKININ_CATABOLIC_PROCESS	7	0.377901	0.734404	0.797677	0.950097	1	1606	tags=14%, list=8%, signal=16%
GOBP_BRAIN_DERIVED_NEUROTROPHIC_FACTOR_RECEPTOR_SIGNALING_PATHWAY	8	0.800989	1.65686	0.0112888	0.0641057	1	2592	tags=63%, list=13%, signal=72%
GOBP_BRAIN_MORPHOGENESIS	39	0.519955	1.52383	0.0221367	0.151515	1	2978	tags=36%, list=15%, signal=42%
GOBP_BRAIN_RENIN_ANGIOTENSIN_SYSTEM	6	0.484271	0.925095	0.57087	0.789507	1	73	tags=17%, list=0%, signal=17%
GOBP_BRANCH_ELONGATION_INVOLVED_IN_MAMMARY_GLAND_DUCT_BRANCHING	4	0.585236	1.00044	0.495783	0.694613	1	2910	tags=50%, list=15%, signal=59%
GOBP_BRANCHED_CHAIN_AMINO_ACID_TRANSPORT	11	0.655422	1.45566	0.0606061	0.206093	1	1241	tags=27%, list=6%, signal=29%
GOBP_BRANCHING_MORPHOGENESIS_OF_A_NERVE	14	0.439545	1.02741	0.443289	0.659041	1	1849	tags=36%, list=10%, signal=39%
GOBP_BRANCHIOMOTOR_NEURON_AXON_GUIDANCE	6	0.680829	1.27332	0.190875	0.386913	1	1785	tags=33%, list=9%, signal=37%
GOBP_BRONCHIOLE_DEVELOPMENT	2	0.386333	0.565006	0.955313	0.990488	1	3067	tags=50%, list=16%, signal=59%
GOBP_BUNDLE_OF_HIS_CELL_TO_PURKINJE_MYOCYTE_COMMUNICATION	13	0.445292	1.01897	0.4548	0.670053	1	1175	tags=31%, list=6%, signal=33%
GOBP_BUNDLE_OF_HIS_CELL_TO_PURKINJE_MYOCYTE_SIGNALING	7	0.558672	1.09365	0.386157	0.58264	1	1175	tags=43%, list=6%, signal=46%
GOBP_C_5_METHYLATION_OF_CYTOSINE	3	0.615782	0.973684	0.564886	0.726706	1	6147	tags=67%, list=32%, signal=98%
GOBP_C_TERMINAL_PROTEIN_AMINO_ACID_MODIFICATION	15	0.624473	1.49357	0.0513291	0.175574	1	6144	tags=67%, list=32%, signal=98%
GOBP_C_TERMINAL_PROTEIN_LIPIDATION	8	0.604654	1.22603	0.235237	0.434002	1	6144	tags=75%, list=32%, signal=110%
GOBP_CADMIUM_ION_TRANSMEMBRANE_TRANSPORT	5	0.40869	0.742301	0.787129	0.946194	1	1391	tags=20%, list=7%, signal=22%
GOBP_CALCINEURIN_MEDIATED_SIGNALING	44	0.518321	1.56701	0.0123928	0.117779	1	2007	tags=30%, list=10%, signal=33%
GOBP_CALCIUM_ACTIVATED_PHOSPHOLIPID_SCRAMBLING	4	0.544117	0.93494	0.597645	0.776706	1	4770	tags=75%, list=25%, signal=99%
GOBP_CALCIUM_DEPENDENT_CELL_CELL_ADHESION_VIA_PLASMA_MEMBRANE_CELL_ADHESION_MOLECULES	32	0.532221	1.51806	0.0208531	0.155576	1	2914	tags=41%, list=15%, signal=48%
GOBP_CALCIUM_INDEPENDENT_CELL_CELL_ADHESION_VIA_PLASMA_MEMBRANE_CELL_ADHESION_MOLECULES	6	0.733532	1.3808	0.0968037	0.279196	1	1921	tags=50%, list=10%, signal=55%
GOBP_CALCIUM_ION_EXPORT_ACROSS_PLASMA_MEMBRANE	9	0.782448	1.64717	0.0130354	0.0695497	1	3148	tags=56%, list=16%, signal=66%
GOBP_CALCIUM_ION_HOMEOSTASIS	295	0.323026	1.27286	0.0247788	0.386789	1	3148	tags=25%, list=16%, signal=30%
GOBP_CALCIUM_ION_IMPORT	52	0.272245	0.838738	0.744966	0.87586	1	4404	tags=31%, list=23%, signal=40%
GOBP_CALCIUM_ION_IMPORT_ACROSS_PLASMA_MEMBRANE	35	0.55023	1.57317	0.0111421	0.113086	1	3212	tags=31%, list=17%, signal=38%	voltage gated channel activity
GOBP_CALCIUM_ION_REGULATED_EXOCYTOSIS	71	0.359711	1.19044	0.160886	0.47495	1	3365	tags=31%, list=17%, signal=37%
GOBP_CALCIUM_ION_REGULATED_EXOCYTOSIS_OF_NEUROTRANSMITTER	24	0.500908	1.31321	0.111418	0.346532	1	4069	tags=46%, list=21%, signal=58%
GOBP_CALCIUM_ION_TRANSMEMBRANE_IMPORT_INTO_CYTOSOL	163	0.400826	1.48897	0.000904159	0.178316	1	3273	tags=29%, list=17%, signal=34%	voltage gated channel activity
GOBP_CALCIUM_ION_TRANSMEMBRANE_TRANSPORT	289	0.327817	1.29782	0.0150977	0.361372	1	3273	tags=26%, list=17%, signal=31%
GOBP_CALCIUM_ION_TRANSMEMBRANE_TRANSPORT_VIA_HIGH_VOLTAGE_GATED_CALCIUM_CHANNEL	15	0.561476	1.31617	0.137536	0.343326	1	2728	tags=60%, list=14%, signal=70%
GOBP_CALCIUM_ION_TRANSPORT	393	0.316635	1.29029	0.0117435	0.370257	1	3273	tags=25%, list=17%, signal=29%
GOBP_CALCIUM_ION_TRANSPORT_INTO_CYTOSOL	27	0.441378	1.19981	0.215084	0.463559	1	4140	tags=44%, list=21%, signal=56%
GOBP_CALCIUM_MEDIATED_SIGNALING	167	0.34384	1.27648	0.049416	0.383076	1	2299	tags=22%, list=12%, signal=24%
GOBP_CALMODULIN_DEPENDENT_KINASE_SIGNALING_PATHWAY	16	0.408956	0.990294	0.471941	0.706221	1	1609	tags=25%, list=8%, signal=27%
GOBP_CAMERA_TYPE_EYE_MORPHOGENESIS	135	0.29094	1.0563	0.328427	0.625293	1	2249	tags=18%, list=12%, signal=20%
GOBP_CAMERA_TYPE_EYE_PHOTORECEPTOR_CELL_DIFFERENTIATION	34	0.448128	1.27109	0.143376	0.388586	1	2112	tags=24%, list=11%, signal=26%
GOBP_CAMKK_AMPK_SIGNALING_CASCADE	13	0.39758	0.919102	0.571981	0.795067	1	1609	tags=23%, list=8%, signal=25%
GOBP_CAMP_BIOSYNTHETIC_PROCESS	9	0.599826	1.27754	0.178877	0.381825	1	2304	tags=33%, list=12%, signal=38%
GOBP_CAMP_MEDIATED_SIGNALING	60	0.380162	1.21218	0.161671	0.450319	1	1769	tags=20%, list=9%, signal=22%
GOBP_CAMP_METABOLIC_PROCESS	13	0.546673	1.25357	0.171592	0.405147	1	3827	tags=46%, list=20%, signal=57%
GOBP_CANNABINOID_SIGNALING_PATHWAY	6	0.614732	1.15793	0.317027	0.51213	1	1434	tags=33%, list=7%, signal=36%
GOBP_CANONICAL_WNT_SIGNALING_PATHWAY_INVOLVED_IN_HEART_DEVELOPMENT	3	0.541834	0.865293	0.668887	0.853053	1	8314	tags=67%, list=43%, signal=117%
GOBP_CAP_INDEPENDENT_TRANSLATIONAL_INITIATION	5	0.370288	0.677511	0.837915	0.970489	1	5308	tags=40%, list=27%, signal=55%
GOBP_CARBOHYDRATE_BIOSYNTHETIC_PROCESS	183	0.307519	1.15288	0.159926	0.51671	1	3375	tags=23%, list=17%, signal=28%
GOBP_CARBOHYDRATE_IMPORT_ACROSS_PLASMA_MEMBRANE	3	0.637755	1.01351	0.494549	0.677978	1	1860	tags=33%, list=10%, signal=37%
GOBP_CARBOHYDRATE_METABOLIC_PROCESS	486	0.252426	1.04368	0.309157	0.639998	1	1894	tags=13%, list=10%, signal=14%
GOBP_CARBON_CATABOLITE_REGULATION_OF_TRANSCRIPTION	9	0.366281	0.776783	0.745211	0.92756	1	606	tags=11%, list=3%, signal=11%
GOBP_CARBON_CATABOLITE_REGULATION_OF_TRANSCRIPTION_FROM_RNA_POLYMERASE_II_PROMOTER	8	0.387886	0.787339	0.729469	0.920722	1	4438	tags=38%, list=23%, signal=49%
GOBP_CARDIAC_ATRIUM_DEVELOPMENT	32	0.25467	0.717226	0.894195	0.956777	1	3610	tags=22%, list=19%, signal=27%
GOBP_CARDIAC_CELL_DEVELOPMENT	103	0.305683	1.06726	0.323944	0.613018	1	4001	tags=31%, list=21%, signal=39%
GOBP_CARDIAC_CELL_FATE_COMMITMENT	10	0.235216	0.51148	0.971507	0.996775	1	5935	tags=40%, list=31%, signal=58%
GOBP_CARDIAC_CHAMBER_DEVELOPMENT	170	0.257933	0.958828	0.571695	0.746124	1	3448	tags=23%, list=18%, signal=28%
GOBP_CARDIAC_CHAMBER_FORMATION	6	0.324862	0.61397	0.899247	0.985124	1	1834	tags=17%, list=9%, signal=18%
GOBP_CARDIAC_CONDUCTION	61	0.378504	1.20518	0.173913	0.456883	1	3276	tags=39%, list=17%, signal=47%
GOBP_CARDIAC_FIBROBLAST_CELL_DIFFERENTIATION	5	0.754123	1.35634	0.108736	0.302047	1	1038	tags=40%, list=5%, signal=42%
GOBP_CARDIAC_MUSCLE_ADAPTATION	25	0.519106	1.40347	0.0772059	0.255688	1	3748	tags=40%, list=19%, signal=50%
GOBP_CARDIAC_MUSCLE_CELL_ACTION_POTENTIAL	56	0.470894	1.50517	0.0210816	0.166799	1	3276	tags=46%, list=17%, signal=56%
GOBP_CARDIAC_MUSCLE_CELL_ACTION_POTENTIAL_INVOLVED_IN_CONTRACTION	39	0.438827	1.30585	0.131086	0.353346	1	2725	tags=38%, list=14%, signal=45%
GOBP_CARDIAC_MUSCLE_CELL_CARDIAC_MUSCLE_CELL_ADHESION	7	0.489197	0.961191	0.532701	0.742985	1	2706	tags=43%, list=14%, signal=50%
GOBP_CARDIAC_MUSCLE_CELL_CONTRACTION	66	0.347929	1.12199	0.260618	0.549075	1	3137	tags=38%, list=16%, signal=45%
GOBP_CARDIAC_MUSCLE_CELL_DIFFERENTIATION	132	0.316625	1.14254	0.181991	0.526908	1	4001	tags=30%, list=21%, signal=38%
GOBP_CARDIAC_MUSCLE_CELL_FATE_COMMITMENT	5	0.672168	1.2333	0.225071	0.427532	1	1554	tags=20%, list=8%, signal=22%
GOBP_CARDIAC_MUSCLE_CELL_MEMBRANE_REPOLARIZATION	26	0.354154	0.963148	0.506679	0.741874	1	1801	tags=27%, list=9%, signal=30%
GOBP_CARDIAC_MUSCLE_CELL_PROLIFERATION	56	0.298556	0.94347	0.562619	0.765766	1	2568	tags=20%, list=13%, signal=23%
GOBP_CARDIAC_NEURAL_CREST_CELL_DIFFERENTIATION_INVOLVED_IN_HEART_DEVELOPMENT	17	0.310183	0.752593	0.814259	0.940078	1	1833	tags=18%, list=9%, signal=19%
GOBP_CARDIAC_NEURAL_CREST_CELL_MIGRATION_INVOLVED_IN_OUTFLOW_TRACT_MORPHOGENESIS	10	0.294013	0.641172	0.901223	0.980143	1	1833	tags=20%, list=9%, signal=22%
GOBP_CARDIAC_VENTRICLE_FORMATION	3	0.597598	0.96263	0.583093	0.741969	1	1834	tags=33%, list=9%, signal=37%
GOBP_CARDIOCYTE_DIFFERENTIATION	170	0.302374	1.12411	0.202578	0.547462	1	4001	tags=29%, list=21%, signal=36%
GOBP_CARDIOLIPIN_ACYL_CHAIN_REMODELING	5	0.499481	0.906009	0.62758	0.808781	1	1749	tags=40%, list=9%, signal=44%
GOBP_CARTILAGE_DEVELOPMENT	188	0.335523	1.26741	0.0559006	0.392615	1	3229	tags=23%, list=17%, signal=28%
GOBP_CARTILAGE_DEVELOPMENT_INVOLVED_IN_ENDOCHONDRAL_BONE_MORPHOGENESIS	37	0.246482	0.715305	0.898467	0.957404	1	2759	tags=19%, list=14%, signal=22%
GOBP_CARTILAGE_MORPHOGENESIS	9	0.390619	0.828808	0.691346	0.885633	1	1834	tags=22%, list=9%, signal=25%
GOBP_CATECHOLAMINE_SECRETION	75	0.498217	1.63123	0.00371402	0.078208	1	2754	tags=35%, list=14%, signal=40%
GOBP_CATECHOLAMINE_TRANSPORT	90	0.446381	1.53097	0.0118289	0.146144	1	2759	tags=31%, list=14%, signal=36%
GOBP_CATECHOLAMINE_UPTAKE_INVOLVED_IN_SYNAPTIC_TRANSMISSION	9	0.467565	0.978802	0.509767	0.718843	1	284	tags=11%, list=1%, signal=11%
GOBP_CD4_POSITIVE_CD25_POSITIVE_ALPHA_BETA_REGULATORY_T_CELL_DIFFERENTIATION	6	0.676501	1.29206	0.171206	0.36754	1	754	tags=33%, list=4%, signal=35%
GOBP_CD4_POSITIVE_OR_CD8_POSITIVE_ALPHA_BETA_T_CELL_LINEAGE_COMMITMENT	19	0.482296	1.20661	0.23025	0.455114	1	1797	tags=26%, list=9%, signal=29%
GOBP_CELL_ADHESION_INVOLVED_IN_HEART_MORPHOGENESIS	8	0.252899	0.511656	0.956232	0.996868	1	1774	tags=13%, list=9%, signal=14%
GOBP_CELL_CELL_ADHESION_MEDIATED_BY_CADHERIN	38	0.523834	1.51075	0.0267176	0.161977	1	2562	tags=42%, list=13%, signal=48%
GOBP_CELL_CELL_ADHESION_VIA_PLASMA_MEMBRANE_ADHESION_MOLECULES	185	0.389751	1.48139	0.00277008	0.185111	1	2967	tags=32%, list=15%, signal=38%
GOBP_CELL_CELL_SIGNALING_BY_WNT	409	0.240892	0.984679	0.493518	0.711489	1	3209	tags=21%, list=17%, signal=24%
GOBP_CELL_CELL_SIGNALING_INVOLVED_IN_CARDIAC_CONDUCTION	26	0.502147	1.35874	0.0932971	0.299833	1	3276	tags=46%, list=17%, signal=55%
GOBP_CELL_COMMUNICATION_INVOLVED_IN_CARDIAC_CONDUCTION	39	0.424035	1.22821	0.180266	0.43261	1	3276	tags=38%, list=17%, signal=46%
GOBP_CELL_CYCLE_DNA_REPLICATION	38	0.302482	0.879388	0.682569	0.836967	1	6151	tags=34%, list=32%, signal=50%
GOBP_CELL_CYCLE_DNA_REPLICATION_INITIATION	5	0.416	0.751517	0.78672	0.940663	1	7286	tags=40%, list=38%, signal=64%
GOBP_CELL_CYCLE_G1_S_PHASE_TRANSITION	244	0.289832	1.12407	0.173168	0.547284	1	3164	tags=21%, list=16%, signal=25%
GOBP_CELL_CYCLE_G2_M_PHASE_TRANSITION	149	0.288302	1.05043	0.338936	0.632653	1	3270	tags=21%, list=17%, signal=26%
GOBP_CELL_DIFFERENTIATION_INVOLVED_IN_EMBRYONIC_PLACENTA_DEVELOPMENT	24	0.251431	0.666263	0.912181	0.973554	1	3264	tags=21%, list=17%, signal=25%
GOBP_CELL_FATE_SPECIFICATION_INVOLVED_IN_PATTERN_SPECIFICATION	5	0.617556	1.14794	0.318519	0.522498	1	398	tags=20%, list=2%, signal=20%
GOBP_CELL_GROWTH	496	0.328169	1.36313	0.000883392	0.296346	1	3352	tags=27%, list=17%, signal=32%
GOBP_CELL_JUNCTION_ASSEMBLY	431	0.339305	1.39426	0.00257954	0.265006	1	2542	tags=27%, list=13%, signal=30%
GOBP_CELL_JUNCTION_DISASSEMBLY	26	0.313088	0.864534	0.673112	0.85385	1	1703	tags=15%, list=9%, signal=17%
GOBP_CELL_JUNCTION_MAINTENANCE	49	0.443749	1.37027	0.0560579	0.288342	1	2520	tags=29%, list=13%, signal=33%
GOBP_CELL_MIGRATION_INVOLVED_IN_GASTRULATION	13	0.381236	0.874355	0.633266	0.843323	1	130	tags=8%, list=1%, signal=8%
GOBP_CELL_MIGRATION_INVOLVED_IN_SPROUTING_ANGIOGENESIS	53	0.395623	1.23449	0.15657	0.425929	1	3050	tags=26%, list=16%, signal=31%
GOBP_CELL_MOTILITY_INVOLVED_IN_CEREBRAL_CORTEX_RADIAL_GLIA_GUIDED_MIGRATION	7	0.351761	0.686906	0.845521	0.967936	1	1897	tags=14%, list=10%, signal=16%
GOBP_CELL_PROLIFERATION_IN_MIDBRAIN	5	0.741868	1.3592	0.102515	0.299215	1	515	tags=40%, list=3%, signal=41%
GOBP_CELL_PROLIFERATION_INVOLVED_IN_KIDNEY_DEVELOPMENT	17	0.331696	0.813582	0.725791	0.899485	1	2439	tags=24%, list=13%, signal=27%
GOBP_CELL_PROLIFERATION_INVOLVED_IN_METANEPHROS_DEVELOPMENT	9	0.439308	0.919221	0.567901	0.795084	1	2439	tags=33%, list=13%, signal=38%
GOBP_CELL_RECOGNITION	116	0.3399	1.20027	0.141651	0.463077	1	2543	tags=22%, list=13%, signal=26%
GOBP_CELL_SURFACE_PATTERN_RECOGNITION_RECEPTOR_SIGNALING_PATHWAY	56	0.257862	0.813814	0.79925	0.899382	1	1164	tags=9%, list=6%, signal=9%
GOBP_CELLULAR_COMPONENT_DISASSEMBLY	433	0.276681	1.13686	0.103731	0.533265	1	4564	tags=29%, list=24%, signal=37%
GOBP_CELLULAR_COMPONENT_DISASSEMBLY_INVOLVED_IN_EXECUTION_PHASE_OF_APOPTOSIS	27	0.325018	0.885454	0.636711	0.83193	1	6871	tags=48%, list=35%, signal=74%
GOBP_CELLULAR_COMPONENT_MAINTENANCE	78	0.372713	1.23801	0.128666	0.421661	1	2520	tags=27%, list=13%, signal=31%
GOBP_CELLULAR_EXTRAVASATION	62	0.318076	1.01242	0.416438	0.679827	1	2562	tags=21%, list=13%, signal=24%
GOBP_CELLULAR_GLUCURONIDATION	2	0.759942	1.12024	0.344262	0.551346	1	4655	tags=100%, list=24%, signal=132%
GOBP_CELLULAR_NITROGEN_COMPOUND_CATABOLIC_PROCESS	390	0.188687	0.768539	0.997329	0.932685	1	5310	tags=30%, list=27%, signal=40%
GOBP_CELLULAR_PROCESS_INVOLVED_IN_REPRODUCTION_IN_MULTICELLULAR_ORGANISM	397	0.236392	0.962084	0.598622	0.742	1	3732	tags=23%, list=19%, signal=28%
GOBP_CELLULAR_RESPONSE_TO_ABIOTIC_STIMULUS	260	0.240743	0.938737	0.647005	0.770857	1	3584	tags=21%, list=18%, signal=26%
GOBP_CELLULAR_RESPONSE_TO_ACID_CHEMICAL	81	0.344663	1.1538	0.205855	0.515611	1	3294	tags=26%, list=17%, signal=31%
GOBP_CELLULAR_RESPONSE_TO_ALCOHOL	79	0.308515	1.0225	0.39	0.665557	1	2395	tags=23%, list=12%, signal=26%
GOBP_CELLULAR_RESPONSE_TO_ALDOSTERONE	4	0.67986	1.15897	0.308285	0.510759	1	1082	tags=25%, list=6%, signal=26%
GOBP_CELLULAR_RESPONSE_TO_ANTIBIOTIC	11	0.444134	0.998614	0.468026	0.696592	1	1834	tags=27%, list=9%, signal=30%
GOBP_CELLULAR_RESPONSE_TO_BIOTIC_STIMULUS	185	0.208135	0.774869	0.967123	0.928882	1	1834	tags=10%, list=9%, signal=11%
GOBP_CELLULAR_RESPONSE_TO_BRAIN_DERIVED_NEUROTROPHIC_FACTOR_STIMULUS	9	0.774174	1.60314	0.0145773	0.0952063	1	1704	tags=78%, list=9%, signal=85%
GOBP_CELLULAR_RESPONSE_TO_CADMIUM_ION	23	0.317419	0.834707	0.702168	0.879789	1	1658	tags=17%, list=9%, signal=19%
GOBP_CELLULAR_RESPONSE_TO_CALCIUM_ION	83	0.524954	1.779	0.000926784	0.0244668	0.9995	2007	tags=34%, list=10%, signal=37%
GOBP_CELLULAR_RESPONSE_TO_CARBOHYDRATE_STIMULUS	140	0.393208	1.42578	0.00990991	0.236177	1	2131	tags=19%, list=11%, signal=22%
GOBP_CELLULAR_RESPONSE_TO_CGMP	6	0.49316	0.928239	0.569302	0.785597	1	769	tags=33%, list=4%, signal=35%
GOBP_CELLULAR_RESPONSE_TO_COCAINE	8	0.598984	1.23053	0.234043	0.429102	1	5214	tags=63%, list=27%, signal=85%
GOBP_CELLULAR_RESPONSE_TO_CORTICOSTEROID_STIMULUS	47	0.284964	0.880755	0.678908	0.836381	1	3249	tags=26%, list=17%, signal=31%
GOBP_CELLULAR_RESPONSE_TO_ELECTRICAL_STIMULUS	8	0.350229	0.696825	0.838741	0.964916	1	393	tags=13%, list=2%, signal=13%
GOBP_CELLULAR_RESPONSE_TO_ESTRADIOL_STIMULUS	21	0.372897	0.96469	0.504854	0.739748	1	901	tags=10%, list=5%, signal=10%
GOBP_CELLULAR_RESPONSE_TO_ETHER	8	0.574218	1.16651	0.304991	0.504298	1	242	tags=13%, list=1%, signal=13%
GOBP_CELLULAR_RESPONSE_TO_EXTERNAL_STIMULUS	268	0.247868	0.970813	0.542601	0.730974	1	2214	tags=16%, list=11%, signal=18%
GOBP_CELLULAR_RESPONSE_TO_EXTRACELLULAR_STIMULUS	235	0.266891	1.03523	0.351017	0.649129	1	2310	tags=17%, list=12%, signal=19%
GOBP_CELLULAR_RESPONSE_TO_FLUID_SHEAR_STRESS	17	0.533205	1.29295	0.157599	0.366815	1	2362	tags=29%, list=12%, signal=33%
GOBP_CELLULAR_RESPONSE_TO_GLUCOCORTICOID_STIMULUS	41	0.29975	0.889798	0.640879	0.826724	1	3249	tags=27%, list=17%, signal=32%
GOBP_CELLULAR_RESPONSE_TO_HISTAMINE	7	0.817781	1.62029	0.0191388	0.0842399	1	1091	tags=57%, list=6%, signal=61%
GOBP_CELLULAR_RESPONSE_TO_HORMONE_STIMULUS	471	0.306358	1.26621	0.0104987	0.393787	1	3357	tags=24%, list=17%, signal=29%
GOBP_CELLULAR_RESPONSE_TO_HYDROPEROXIDE	8	0.627862	1.27991	0.179754	0.379614	1	121	tags=13%, list=1%, signal=13%
GOBP_CELLULAR_RESPONSE_TO_HYPEROXIA	5	0.597516	1.0866	0.392925	0.59127	1	755	tags=20%, list=4%, signal=21%
GOBP_CELLULAR_RESPONSE_TO_INORGANIC_SUBSTANCE	181	0.39022	1.46824	0.00188501	0.19741	1	2042	tags=25%, list=11%, signal=28%
GOBP_CELLULAR_RESPONSE_TO_INSULIN_LIKE_GROWTH_FACTOR_STIMULUS	8	0.664464	1.35759	0.134951	0.300865	1	1131	tags=25%, list=6%, signal=27%
GOBP_CELLULAR_RESPONSE_TO_INSULIN_STIMULUS	193	0.337845	1.27768	0.051444	0.381806	1	2562	tags=21%, list=13%, signal=24%
GOBP_CELLULAR_RESPONSE_TO_INTERLEUKIN_12	9	0.545009	1.14728	0.318692	0.522635	1	1751	tags=22%, list=9%, signal=24%
GOBP_CELLULAR_RESPONSE_TO_INTERLEUKIN_18	7	0.458293	0.903765	0.614525	0.810611	1	504	tags=14%, list=3%, signal=15%
GOBP_CELLULAR_RESPONSE_TO_INTERLEUKIN_2	9	0.405236	0.843609	0.671456	0.870996	1	796	tags=11%, list=4%, signal=12%
GOBP_CELLULAR_RESPONSE_TO_KETONE	82	0.305312	1.034	0.381481	0.650115	1	2395	tags=18%, list=12%, signal=21%
GOBP_CELLULAR_RESPONSE_TO_L_GLUTAMATE	5	0.403808	0.731495	0.809524	0.950878	1	7245	tags=60%, list=37%, signal=96%
GOBP_CELLULAR_RESPONSE_TO_LEPTIN_STIMULUS	15	0.547878	1.30737	0.139906	0.352036	1	812	tags=20%, list=4%, signal=21%
GOBP_CELLULAR_RESPONSE_TO_LEUCINE_STARVATION	13	0.549378	1.26077	0.197429	0.397439	1	2008	tags=38%, list=10%, signal=43%
GOBP_CELLULAR_RESPONSE_TO_LIGHT_STIMULUS	99	0.370834	1.27985	0.0720887	0.379464	1	5019	tags=31%, list=26%, signal=42%
GOBP_CELLULAR_RESPONSE_TO_LIPID	433	0.268432	1.09517	0.179982	0.581427	1	3249	tags=22%, list=17%, signal=25%
GOBP_CELLULAR_RESPONSE_TO_MAGNESIUM_ION	4	0.84602	1.45593	0.0507663	0.20628	1	2877	tags=75%, list=15%, signal=88%
GOBP_CELLULAR_RESPONSE_TO_METAL_ION	161	0.394576	1.46776	0.000907441	0.197468	1	2007	tags=25%, list=10%, signal=28%
GOBP_CELLULAR_RESPONSE_TO_MINERALOCORTICOID_STIMULUS	6	0.786434	1.48922	0.0464253	0.178552	1	1082	tags=33%, list=6%, signal=35%
GOBP_CELLULAR_RESPONSE_TO_NITRIC_OXIDE	11	0.546209	1.20841	0.248808	0.454176	1	2916	tags=55%, list=15%, signal=64%
GOBP_CELLULAR_RESPONSE_TO_ORGANIC_CYCLIC_COMPOUND	427	0.32081	1.3082	0.0043554	0.352005	1	3251	tags=26%, list=17%, signal=30%
GOBP_CELLULAR_RESPONSE_TO_OSMOTIC_STRESS	46	0.328554	0.998516	0.455134	0.696686	1	2209	tags=22%, list=11%, signal=24%
GOBP_CELLULAR_RESPONSE_TO_OXIDISED_LOW_DENSITY_LIPOPROTEIN_PARTICLE_STIMULUS	12	0.239874	0.540452	0.96836	0.994116	1	6171	tags=50%, list=32%, signal=73%
GOBP_CELLULAR_RESPONSE_TO_OXYGEN_LEVELS	131	0.249579	0.894527	0.725264	0.821032	1	2986	tags=18%, list=15%, signal=22%
GOBP_CELLULAR_RESPONSE_TO_PEPTIDE	304	0.297856	1.17997	0.0778872	0.48716	1	2568	tags=20%, list=13%, signal=22%
GOBP_CELLULAR_RESPONSE_TO_RADIATION	156	0.308506	1.13435	0.180952	0.534874	1	4105	tags=26%, list=21%, signal=33%
GOBP_CELLULAR_RESPONSE_TO_REACTIVE_NITROGEN_SPECIES	13	0.529409	1.20702	0.251412	0.454881	1	2916	tags=46%, list=15%, signal=54%
GOBP_CELLULAR_RESPONSE_TO_RETINOIC_ACID	38	0.481996	1.39152	0.0696143	0.267174	1	1961	tags=32%, list=10%, signal=35%
GOBP_CELLULAR_RESPONSE_TO_SALT	177	0.45095	1.68842	0	0.0499488	1	2034	tags=29%, list=10%, signal=32%
GOBP_CELLULAR_RESPONSE_TO_STEROID_HORMONE_STIMULUS	155	0.326791	1.19949	0.110401	0.463718	1	3999	tags=35%, list=21%, signal=44%
GOBP_CELLULAR_RESPONSE_TO_TESTOSTERONE_STIMULUS	8	0.421992	0.855526	0.641834	0.862089	1	386	tags=13%, list=2%, signal=13%
GOBP_CELLULAR_RESPONSE_TO_THYROID_HORMONE_STIMULUS	9	0.657999	1.36961	0.129562	0.289175	1	1750	tags=33%, list=9%, signal=37%
GOBP_CELLULAR_RESPONSE_TO_TRICHOSTATIN_A	4	0.585538	0.99352	0.517771	0.70279	1	1834	tags=50%, list=9%, signal=55%
GOBP_CELLULAR_RESPONSE_TO_UV	85	0.319301	1.07544	0.304265	0.604835	1	5019	tags=31%, list=26%, signal=41%
GOBP_CELLULAR_RESPONSE_TO_UV_A	6	0.665883	1.25996	0.215226	0.39874	1	5019	tags=67%, list=26%, signal=90%
GOBP_CELLULAR_RESPONSE_TO_VIRUS	42	0.285261	0.838827	0.72886	0.875844	1	2911	tags=24%, list=15%, signal=28%
GOBP_CELLULAR_RESPONSE_TO_WATER_STIMULUS	4	0.452205	0.78222	0.738118	0.924572	1	1054	tags=25%, list=5%, signal=26%
GOBP_CELLULAR_RESPONSE_TO_X_RAY	8	0.580439	1.18555	0.278409	0.480406	1	3983	tags=50%, list=21%, signal=63%
GOBP_CELLULAR_RESPONSE_TO_ZINC_ION	13	0.498156	1.15459	0.273754	0.51506	1	1352	tags=23%, list=7%, signal=25%
GOBP_CELLULAR_SENESCENCE	84	0.320469	1.07845	0.30066	0.600982	1	1807	tags=11%, list=9%, signal=12%
GOBP_CENTRAL_NERVOUS_SYSTEM_MATURATION	9	0.349073	0.734828	0.814815	0.950323	1	4023	tags=44%, list=21%, signal=56%
GOBP_CENTRAL_NERVOUS_SYSTEM_NEURON_AXONOGENESIS	44	0.506194	1.52011	0.0298651	0.154674	1	3457	tags=45%, list=18%, signal=55%
GOBP_CENTRAL_NERVOUS_SYSTEM_NEURON_DEVELOPMENT	94	0.469174	1.61367	0.00183655	0.0882151	1	3457	tags=40%, list=18%, signal=49%
GOBP_CENTRAL_NERVOUS_SYSTEM_NEURON_DIFFERENTIATION	181	0.336291	1.25592	0.0489834	0.402721	1	3479	tags=30%, list=18%, signal=36%
GOBP_CENTRAL_NERVOUS_SYSTEM_PROJECTION_NEURON_AXONOGENESIS	32	0.415764	1.17802	0.21808	0.490302	1	3457	tags=41%, list=18%, signal=49%
GOBP_CENTRAL_NERVOUS_SYSTEM_SEGMENTATION	4	0.659976	1.14607	0.328794	0.523861	1	3930	tags=50%, list=20%, signal=63%
GOBP_CENTRAL_NERVOUS_SYSTEM_VASCULOGENESIS	5	0.280301	0.504424	0.965278	0.997358	1	2110	tags=20%, list=11%, signal=22%
GOBP_CENTRIOLE_ASSEMBLY	45	0.322898	0.97499	0.491023	0.724464	1	4542	tags=31%, list=23%, signal=41%
GOBP_CENTRIOLE_CENTRIOLE_COHESION	14	0.531166	1.26542	0.187325	0.394189	1	5222	tags=57%, list=27%, signal=78%
GOBP_CENTRIOLE_ELONGATION	8	0.396778	0.810982	0.725	0.902127	1	1210	tags=25%, list=6%, signal=27%
GOBP_CENTROMERE_COMPLEX_ASSEMBLY	27	0.317873	0.869385	0.668849	0.848716	1	5560	tags=26%, list=29%, signal=36%
GOBP_CENTROMERIC_SISTER_CHROMATID_COHESION	9	0.485942	1.02553	0.446461	0.661822	1	5029	tags=44%, list=26%, signal=60%
GOBP_CENTROSOME_DUPLICATION	74	0.264228	0.877718	0.710821	0.839531	1	2597	tags=16%, list=13%, signal=19%
GOBP_CENTROSOME_SEPARATION	13	0.562426	1.30661	0.15576	0.352894	1	132	tags=15%, list=1%, signal=15%
GOBP_CEREBELLAR_CORTEX_DEVELOPMENT	69	0.258712	0.846679	0.751131	0.869239	1	2807	tags=14%, list=14%, signal=17%
GOBP_CEREBELLAR_CORTEX_MORPHOGENESIS	46	0.280141	0.849138	0.726066	0.867467	1	1019	tags=9%, list=5%, signal=9%
GOBP_CEREBELLAR_PURKINJE_CELL_LAYER_FORMATION	19	0.290745	0.72621	0.840634	0.953098	1	226	tags=5%, list=1%, signal=5%
GOBP_CEREBELLAR_PURKINJE_CELL_LAYER_MORPHOGENESIS	24	0.320415	0.848521	0.679048	0.8682	1	1019	tags=8%, list=5%, signal=9%
GOBP_CEREBRAL_CORTEX_CELL_MIGRATION	54	0.494562	1.53847	0.0132576	0.139612	1	2604	tags=30%, list=13%, signal=34%
GOBP_CEREBRAL_CORTEX_DEVELOPMENT	116	0.445918	1.58483	0.000909091	0.105718	1	2911	tags=29%, list=15%, signal=34%
GOBP_CEREBRAL_CORTEX_GABAERGIC_INTERNEURON_DIFFERENTIATION	10	0.276174	0.599886	0.924242	0.986595	1	3002	tags=30%, list=15%, signal=35%
GOBP_CEREBRAL_CORTEX_NEURON_DIFFERENTIATION	28	0.344281	0.943248	0.537604	0.76588	1	3971	tags=43%, list=20%, signal=54%
GOBP_CEREBRAL_CORTEX_RADIALLY_ORIENTED_CELL_MIGRATION	40	0.545229	1.61022	0.0093985	0.0907403	1	2604	tags=33%, list=13%, signal=37%
GOBP_CEREBRAL_CORTEX_TANGENTIAL_MIGRATION	7	0.437447	0.865896	0.636701	0.852549	1	1496	tags=29%, list=8%, signal=31%
GOBP_CEREBROSPINAL_FLUID_CIRCULATION	17	0.367749	0.897128	0.593123	0.818815	1	5167	tags=47%, list=27%, signal=64%	motile cilium movement cerebrospinal
GOBP_CGMP_BIOSYNTHETIC_PROCESS	9	0.506001	1.07338	0.379535	0.606485	1	342	tags=22%, list=2%, signal=23%
GOBP_CGMP_METABOLIC_PROCESS	15	0.632516	1.50589	0.0461538	0.166071	1	769	tags=27%, list=4%, signal=28%
GOBP_CHAPERONE_MEDIATED_PROTEIN_COMPLEX_ASSEMBLY	19	0.237402	0.590372	0.964706	0.987132	1	2285	tags=16%, list=12%, signal=18%
GOBP_CHEMOREPULSION_OF_AXON	5	0.403705	0.736738	0.778537	0.94936	1	2806	tags=40%, list=14%, signal=47%
GOBP_CHEMOSENSORY_BEHAVIOR	17	0.442769	1.09098	0.356427	0.585946	1	1437	tags=29%, list=7%, signal=32%
GOBP_CHLORIDE_TRANSMEMBRANE_TRANSPORT	55	0.512448	1.61552	0.0056872	0.0870373	1	3231	tags=35%, list=17%, signal=41%
GOBP_CHONDROBLAST_DIFFERENTIATION	4	0.510437	0.877224	0.654808	0.839846	1	1016	tags=25%, list=5%, signal=26%
GOBP_CHONDROCYTE_DEVELOPMENT	32	0.383038	1.08187	0.350775	0.596157	1	2759	tags=25%, list=14%, signal=29%
GOBP_CHONDROCYTE_DIFFERENTIATION	114	0.357644	1.26876	0.0723005	0.391407	1	2911	tags=23%, list=15%, signal=27%
GOBP_CHONDROCYTE_HYPERTROPHY	6	0.385023	0.72969	0.795918	0.950858	1	383	tags=17%, list=2%, signal=17%
GOBP_CHONDROCYTE_PROLIFERATION	24	0.314973	0.831344	0.716253	0.883723	1	411	tags=13%, list=2%, signal=13%
GOBP_CHONDROITIN_SULFATE_BIOSYNTHETIC_PROCESS	14	0.498043	1.1735	0.263207	0.495741	1	1936	tags=21%, list=10%, signal=24%
GOBP_CHONDROITIN_SULFATE_METABOLIC_PROCESS	24	0.573874	1.50141	0.0331187	0.169716	1	1936	tags=29%, list=10%, signal=32%
GOBP_CHONDROITIN_SULFATE_PROTEOGLYCAN_BIOSYNTHETIC_PROCESS	21	0.502862	1.29985	0.143925	0.359397	1	1936	tags=24%, list=10%, signal=26%
GOBP_CHONDROITIN_SULFATE_PROTEOGLYCAN_METABOLIC_PROCESS	31	0.565918	1.582	0.0166016	0.107235	1	1936	tags=29%, list=10%, signal=32%
GOBP_CHORIO_ALLANTOIC_FUSION	10	0.460537	0.99714	0.478092	0.698809	1	3594	tags=50%, list=19%, signal=61%
GOBP_CHORION_DEVELOPMENT	10	0.234367	0.503599	0.973516	0.997398	1	6685	tags=50%, list=34%, signal=76%
GOBP_CHROMATIN_REMODELING	434	0.271752	1.11155	0.150786	0.562022	1	4470	tags=27%, list=23%, signal=35%
GOBP_CHROMOSOME_ATTACHMENT_TO_THE_NUCLEAR_ENVELOPE	6	0.258984	0.487149	0.972744	0.997839	1	1897	tags=17%, list=10%, signal=18%
GOBP_CHROMOSOME_CONDENSATION	33	0.202001	0.571123	0.976236	0.989224	1	4651	tags=24%, list=24%, signal=32%
GOBP_CHROMOSOME_MOVEMENT_TOWARDS_SPINDLE_POLE	5	0.784298	1.41357	0.0791706	0.24883	1	1998	tags=60%, list=10%, signal=67%
GOBP_CHROMOSOME_ORGANIZATION_INVOLVED_IN_MEIOTIC_CELL_CYCLE	54	0.345921	1.08906	0.311688	0.588042	1	3198	tags=28%, list=16%, signal=33%
GOBP_CHROMOSOME_SEGREGATION	385	0.263477	1.06928	0.240283	0.610169	1	3473	tags=21%, list=18%, signal=25%
GOBP_CHRONIC_INFLAMMATORY_RESPONSE_TO_ANTIGENIC_STIMULUS	3	0.483756	0.7729	0.766184	0.929985	1	6698	tags=67%, list=35%, signal=102%
GOBP_CILIUM_MOVEMENT	172	0.353248	1.31968	0.0420475	0.339738	1	4781	tags=44%, list=25%, signal=58%	motile cilium movement cerebrospinal
GOBP_CILIUM_OR_FLAGELLUM_DEPENDENT_CELL_MOTILITY	136	0.343782	1.22978	0.0949821	0.430039	1	3491	tags=33%, list=18%, signal=40%
GOBP_CILIUM_ORGANIZATION	387	0.383683	1.5529	0	0.127685	1	4834	tags=37%, list=25%, signal=48%
GOBP_CIRCADIAN_REGULATION_OF_GENE_EXPRESSION	72	0.429662	1.42251	0.0269266	0.240226	1	2827	tags=32%, list=15%, signal=37%
GOBP_CIRCADIAN_RHYTHM	206	0.440267	1.68208	0	0.0521877	1	3543	tags=34%, list=18%, signal=41%
GOBP_CIRCADIAN_SLEEP_WAKE_CYCLE	31	0.584828	1.63847	0.00844278	0.0739585	1	3802	tags=45%, list=20%, signal=56%
GOBP_CIRCADIAN_SLEEP_WAKE_CYCLE_NON_REM_SLEEP	11	0.526715	1.16604	0.295327	0.504662	1	3382	tags=36%, list=17%, signal=44%
GOBP_CIRCADIAN_SLEEP_WAKE_CYCLE_PROCESS	25	0.589953	1.5861	0.0148285	0.10505	1	3802	tags=48%, list=20%, signal=60%
GOBP_CIRCADIAN_SLEEP_WAKE_CYCLE_REM_SLEEP	4	0.676737	1.15028	0.311265	0.520226	1	3382	tags=75%, list=17%, signal=91%
GOBP_CIRCULATORY_SYSTEM_PROCESS	481	0.279759	1.15549	0.0790617	0.514561	1	3213	tags=23%, list=17%, signal=27%
GOBP_CITRATE_METABOLIC_PROCESS	5	0.538242	0.963466	0.562085	0.741541	1	578	tags=20%, list=3%, signal=21%
GOBP_CITRULLINE_METABOLIC_PROCESS	7	0.626651	1.24339	0.211921	0.415537	1	210	tags=14%, list=1%, signal=14%
GOBP_CLATHRIN_COAT_ASSEMBLY	19	0.457788	1.12112	0.326942	0.549986	1	2470	tags=21%, list=13%, signal=24%
GOBP_CLATHRIN_COATED_VESICLE_CARGO_LOADING	7	0.704727	1.37369	0.103984	0.285351	1	2657	tags=43%, list=14%, signal=50%
GOBP_CLATHRIN_DEPENDENT_ENDOCYTOSIS	48	0.461492	1.42112	0.0401914	0.24175	1	4061	tags=44%, list=21%, signal=55%
GOBP_CLUSTERING_OF_VOLTAGE_GATED_POTASSIUM_CHANNELS	6	0.502363	0.956223	0.540922	0.749141	1	1950	tags=50%, list=10%, signal=56%
GOBP_CLUSTERING_OF_VOLTAGE_GATED_SODIUM_CHANNELS	7	0.698435	1.39201	0.107463	0.26711	1	1393	tags=29%, list=7%, signal=31%
GOBP_COCHLEA_DEVELOPMENT	45	0.580316	1.75852	0.000947867	0.028904	1	1456	tags=27%, list=8%, signal=29%
GOBP_COCHLEA_MORPHOGENESIS	24	0.402094	1.06718	0.364245	0.61294	1	2793	tags=21%, list=14%, signal=24%
GOBP_COENZYME_A_BIOSYNTHETIC_PROCESS	12	0.297934	0.664679	0.872795	0.974009	1	3549	tags=33%, list=18%, signal=41%
GOBP_COGNITION	341	0.44276	1.77891	0	0.0244151	0.9995	2784	tags=31%, list=14%, signal=35%	associative learning
GOBP_COLLATERAL_SPROUTING_IN_ABSENCE_OF_INJURY	4	0.568173	0.976749	0.513692	0.721726	1	13	tags=25%, list=0%, signal=25%
GOBP_COLLECTING_DUCT_DEVELOPMENT	9	0.542827	1.12104	0.316682	0.549915	1	1275	tags=33%, list=7%, signal=36%
GOBP_COLUMNAR_CUBOIDAL_EPITHELIAL_CELL_DEVELOPMENT	45	0.410599	1.24686	0.150383	0.411562	1	2374	tags=22%, list=12%, signal=25%
GOBP_COLUMNAR_CUBOIDAL_EPITHELIAL_CELL_MATURATION	11	0.44177	0.991345	0.480072	0.704735	1	306	tags=18%, list=2%, signal=18%
GOBP_COMPLEMENT_DEPENDENT_CYTOTOXICITY	8	0.272225	0.565022	0.943015	0.990617	1	14112	tags=100%, list=73%, signal=367%
GOBP_CONDITIONED_PLACE_PREFERENCE	5	0.830914	1.48553	0.0348072	0.181597	1	2754	tags=80%, list=14%, signal=93%
GOBP_CONDITIONED_TASTE_AVERSION	5	0.807573	1.45874	0.0503953	0.204511	1	3734	tags=100%, list=19%, signal=124%
GOBP_CONNECTIVE_TISSUE_DEVELOPMENT	265	0.293451	1.15082	0.126027	0.519555	1	2595	tags=18%, list=13%, signal=21%
GOBP_CONNECTIVE_TISSUE_REPLACEMENT	11	0.392634	0.857943	0.653992	0.860251	1	4202	tags=36%, list=22%, signal=46%
GOBP_CONSTITUTIVE_HETEROCHROMATIN_FORMATION	12	0.430224	0.977793	0.507966	0.720249	1	3606	tags=33%, list=19%, signal=41%
GOBP_CONSTITUTIVE_SECRETORY_PATHWAY	6	0.553218	1.06418	0.411927	0.616016	1	3014	tags=50%, list=16%, signal=59%
GOBP_CONVERGENT_EXTENSION_INVOLVED_IN_GASTRULATION	8	0.301502	0.606783	0.933971	0.986488	1	4485	tags=25%, list=23%, signal=33%
GOBP_CONVERGENT_EXTENSION_INVOLVED_IN_ORGANOGENESIS	6	0.761232	1.42122	0.0721747	0.241712	1	162	tags=17%, list=1%, signal=17%
GOBP_COP9_SIGNALOSOME_ASSEMBLY	3	0.574932	0.920178	0.630952	0.794187	1	3348	tags=33%, list=17%, signal=40%
GOBP_COPII_COATED_VESICLE_BUDDING	36	0.294552	0.847533	0.721172	0.869053	1	4600	tags=36%, list=24%, signal=47%
GOBP_COPULATION	19	0.433002	1.09366	0.354186	0.582733	1	1399	tags=26%, list=7%, signal=28%
GOBP_CORPUS_CALLOSUM_DEVELOPMENT	27	0.339658	0.924811	0.589169	0.789731	1	3846	tags=33%, list=20%, signal=42%
GOBP_CORPUS_CALLOSUM_MORPHOGENESIS	8	0.461609	0.918969	0.571429	0.795087	1	4941	tags=50%, list=25%, signal=67%
GOBP_CORTICOSTEROID_RECEPTOR_SIGNALING_PATHWAY	17	0.751843	1.83882	0.000934579	0.0128047	0.933	2809	tags=53%, list=14%, signal=62%
GOBP_COTRANSLATIONAL_PROTEIN_TARGETING_TO_MEMBRANE	19	0.415843	1.05411	0.374884	0.628512	1	5994	tags=42%, list=31%, signal=61%
GOBP_COURTSHIP_BEHAVIOR	4	0.798946	1.38236	0.10076	0.277902	1	1	tags=25%, list=0%, signal=25%
GOBP_CRANIAL_GANGLION_DEVELOPMENT	5	0.648858	1.17483	0.301045	0.494537	1	1256	tags=40%, list=6%, signal=43%
GOBP_CRANIAL_NERVE_MORPHOGENESIS	22	0.419135	1.09263	0.337761	0.584207	1	3382	tags=32%, list=17%, signal=38%
GOBP_CRANIAL_NERVE_STRUCTURAL_ORGANIZATION	9	0.827477	1.76785	0	0.0267504	1	2299	tags=56%, list=12%, signal=63%
GOBP_CRD_MEDIATED_MRNA_STABILIZATION	8	0.673227	1.36306	0.123377	0.296188	1	3249	tags=50%, list=17%, signal=60%
GOBP_CYCLIC_NUCLEOTIDE_BIOSYNTHETIC_PROCESS	18	0.523494	1.30477	0.143243	0.354838	1	624	tags=22%, list=3%, signal=23%
GOBP_CYCLIC_NUCLEOTIDE_MEDIATED_SIGNALING	81	0.329138	1.11372	0.260672	0.55909	1	2395	tags=22%, list=12%, signal=25%
GOBP_CYCLIC_NUCLEOTIDE_METABOLIC_PROCESS	30	0.4735	1.31289	0.114087	0.34678	1	769	tags=23%, list=4%, signal=24%
GOBP_CYTOKINESIS	169	0.259192	0.96035	0.543961	0.744381	1	3218	tags=25%, list=17%, signal=30%
GOBP_CYTOLYSIS	7	0.576046	1.14374	0.330426	0.525942	1	5788	tags=71%, list=30%, signal=102%
GOBP_CYTOLYSIS_IN_ANOTHER_ORGANISM	6	0.636964	1.20457	0.242248	0.457383	1	4357	tags=67%, list=22%, signal=86%
GOBP_CYTOPLASM_ORGANIZATION	16	0.369516	0.890235	0.619678	0.826074	1	3510	tags=31%, list=18%, signal=38%
GOBP_CYTOPLASMIC_MICROTUBULE_ORGANIZATION	61	0.458667	1.46075	0.0273843	0.202814	1	2600	tags=30%, list=13%, signal=34%
GOBP_CYTOPLASMIC_SEQUESTERING_OF_NF_KAPPAB	5	0.528688	0.94957	0.569405	0.757928	1	7483	tags=80%, list=39%, signal=130%
GOBP_CYTOPLASMIC_SEQUESTERING_OF_TRANSCRIPTION_FACTOR	12	0.442815	0.996619	0.476777	0.698927	1	3965	tags=33%, list=20%, signal=42%
GOBP_CYTOPLASMIC_TRANSLATIONAL_INITIATION	29	0.299092	0.824932	0.753802	0.889026	1	2576	tags=21%, list=13%, signal=24%
GOBP_CYTOSKELETON_DEPENDENT_INTRACELLULAR_TRANSPORT	205	0.3643	1.39602	0.0135379	0.263242	1	2524	tags=27%, list=13%, signal=31%
GOBP_CYTOSOLIC_TRANSPORT	168	0.396125	1.47743	0.00463822	0.189321	1	2545	tags=26%, list=13%, signal=29%
GOBP_CYTOTOXIC_T_CELL_DIFFERENTIATION	4	0.381996	0.658273	0.87177	0.975613	1	11983	tags=100%, list=62%, signal=262%
GOBP_DAMP_CATABOLIC_PROCESS	6	0.402145	0.750442	0.775549	0.941103	1	2504	tags=50%, list=13%, signal=57%
GOBP_DATP_METABOLIC_PROCESS	7	0.442005	0.879558	0.625755	0.837028	1	2485	tags=43%, list=13%, signal=49%
GOBP_DE_NOVO_IMP_BIOSYNTHETIC_PROCESS	6	0.340729	0.647338	0.882408	0.979145	1	1702	tags=17%, list=9%, signal=18%
GOBP_DE_NOVO_PYRIMIDINE_NUCLEOBASE_BIOSYNTHETIC_PROCESS	6	0.462177	0.883436	0.609922	0.833902	1	6954	tags=50%, list=36%, signal=78%
GOBP_DEADENYLATION_DEPENDENT_DECAPPING_OF_NUCLEAR_TRANSCRIBED_MRNA	12	0.577204	1.29743	0.147802	0.361481	1	2768	tags=33%, list=14%, signal=39%
GOBP_DEADENYLATION_INDEPENDENT_DECAPPING_OF_NUCLEAR_TRANSCRIBED_MRNA	5	0.342962	0.622775	0.886578	0.983901	1	2058	tags=20%, list=11%, signal=22%
GOBP_DECIDUALIZATION	21	0.454192	1.16793	0.246753	0.503037	1	2468	tags=29%, list=13%, signal=33%
GOBP_DEFENSE_RESPONSE_TO_FUNGUS	35	0.344191	0.98375	0.470936	0.712687	1	2349	tags=14%, list=12%, signal=16%
GOBP_DEFENSE_RESPONSE_TO_TUMOR_CELL	10	0.476008	1.02087	0.441816	0.66748	1	921	tags=20%, list=5%, signal=21%
GOBP_DEFINITIVE_ERYTHROCYTE_DIFFERENTIATION	7	0.690435	1.36277	0.129094	0.296487	1	848	tags=29%, list=4%, signal=30%
GOBP_DEFINITIVE_HEMOPOIESIS	21	0.331918	0.848381	0.688132	0.868176	1	1419	tags=14%, list=7%, signal=15%
GOBP_DEHYDROASCORBIC_ACID_TRANSPORT	5	0.72851	1.32692	0.143407	0.331782	1	1860	tags=40%, list=10%, signal=44%
GOBP_DELAMINATION	5	0.474905	0.866786	0.649628	0.852048	1	3599	tags=40%, list=19%, signal=49%
GOBP_DEMETHYLATION	42	0.355517	1.06097	0.329175	0.619506	1	6057	tags=55%, list=31%, signal=79%
GOBP_DENDRITE_ARBORIZATION	12	0.66561	1.50577	0.0476654	0.165995	1	1691	tags=58%, list=9%, signal=64%
GOBP_DENDRITE_DEVELOPMENT	312	0.48978	1.94579	0	0.00302687	0.2805	2894	tags=37%, list=15%, signal=43%	dendrite development
GOBP_DENDRITE_EXTENSION	42	0.570775	1.68869	0.00189394	0.0498532	1	2071	tags=40%, list=11%, signal=45%
GOBP_DENDRITE_MORPHOGENESIS	186	0.540265	2.02566	0	0.00097143	0.0555	2713	tags=41%, list=14%, signal=47%	dendrite development
GOBP_DENDRITE_SELF_AVOIDANCE	11	0.717823	1.58597	0.0204878	0.105077	1	2273	tags=45%, list=12%, signal=51%
GOBP_DENDRITIC_CELL_APOPTOTIC_PROCESS	9	0.66098	1.4054	0.119048	0.254058	1	736	tags=22%, list=4%, signal=23%
GOBP_DENDRITIC_SPINE_DEVELOPMENT	133	0.522325	1.88756	0	0.00748839	0.6735	2823	tags=43%, list=15%, signal=50%	dendrite development
GOBP_DENDRITIC_SPINE_MAINTENANCE	26	0.334982	0.904085	0.609405	0.810885	1	2275	tags=23%, list=12%, signal=26%
GOBP_DENDRITIC_SPINE_MORPHOGENESIS	76	0.60279	2.01842	0	0.000991114	0.0615	3469	tags=58%, list=18%, signal=70%	dendrite development
GOBP_DENDRITIC_TRANSPORT	14	0.423638	1.00203	0.468807	0.693067	1	3249	tags=36%, list=17%, signal=43%
GOBP_DENDRITIC_TRANSPORT_OF_RIBONUCLEOPROTEIN_COMPLEX	6	0.345949	0.653076	0.874159	0.977598	1	7600	tags=50%, list=39%, signal=82%
GOBP_DENSE_CORE_GRANULE_EXOCYTOSIS	15	0.624959	1.49187	0.054986	0.176687	1	1577	tags=33%, list=8%, signal=36%
GOBP_DENSE_CORE_GRANULE_LOCALIZATION	14	0.530495	1.24263	0.205687	0.415941	1	1849	tags=43%, list=10%, signal=47%
GOBP_DENTATE_GYRUS_DEVELOPMENT	25	0.489997	1.31083	0.12572	0.34938	1	1160	tags=28%, list=6%, signal=30%
GOBP_DENTINOGENESIS	5	0.283041	0.514776	0.964043	0.996421	1	5631	tags=60%, list=29%, signal=85%
GOBP_DEOXYGUANOSINE_METABOLIC_PROCESS	5	0.586249	1.05175	0.454887	0.630534	1	14	tags=20%, list=0%, signal=20%
GOBP_DEOXYRIBONUCLEOSIDE_CATABOLIC_PROCESS	8	0.562529	1.13734	0.339585	0.533101	1	2504	tags=38%, list=13%, signal=43%
GOBP_DEOXYRIBONUCLEOSIDE_DIPHOSPHATE_METABOLIC_PROCESS	5	0.455181	0.823323	0.689915	0.890349	1	1574	tags=20%, list=8%, signal=22%
GOBP_DEOXYRIBONUCLEOSIDE_METABOLIC_PROCESS	13	0.524505	1.21061	0.236891	0.451971	1	2546	tags=31%, list=13%, signal=35%
GOBP_DEOXYRIBONUCLEOSIDE_MONOPHOSPHATE_CATABOLIC_PROCESS	19	0.465852	1.18224	0.24548	0.484331	1	1399	tags=16%, list=7%, signal=17%
GOBP_DEOXYRIBONUCLEOSIDE_MONOPHOSPHATE_METABOLIC_PROCESS	29	0.361847	0.998187	0.455146	0.696909	1	2546	tags=17%, list=13%, signal=20%
GOBP_DEOXYRIBONUCLEOSIDE_TRIPHOSPHATE_METABOLIC_PROCESS	12	0.37562	0.837886	0.676153	0.876396	1	2485	tags=33%, list=13%, signal=38%
GOBP_DEOXYRIBONUCLEOTIDE_BIOSYNTHETIC_PROCESS	16	0.340503	0.829901	0.709615	0.88471	1	2949	tags=25%, list=15%, signal=29%
GOBP_DEOXYRIBONUCLEOTIDE_CATABOLIC_PROCESS	26	0.434913	1.17988	0.250691	0.487211	1	2504	tags=19%, list=13%, signal=22%
GOBP_DEOXYRIBONUCLEOTIDE_METABOLIC_PROCESS	45	0.397118	1.20465	0.184874	0.457481	1	2949	tags=22%, list=15%, signal=26%
GOBP_DEPHOSPHORYLATION	304	0.419121	1.66866	0	0.0581955	1	2997	tags=28%, list=15%, signal=32%
GOBP_DERMATAN_SULFATE_CATABOLIC_PROCESS	5	0.440456	0.786351	0.736689	0.921573	1	581	tags=20%, list=3%, signal=21%
GOBP_DERMATAN_SULFATE_METABOLIC_PROCESS	9	0.593188	1.24231	0.226784	0.416362	1	581	tags=22%, list=3%, signal=23%
GOBP_DERMATAN_SULFATE_PROTEOGLYCAN_METABOLIC_PROCESS	11	0.54001	1.20508	0.25641	0.456955	1	581	tags=18%, list=3%, signal=19%
GOBP_DESMOSOME_ORGANIZATION	9	0.542505	1.12834	0.33427	0.542731	1	878	tags=33%, list=5%, signal=35%
GOBP_DETECTION_OF_BIOTIC_STIMULUS	34	0.314897	0.908544	0.612842	0.806119	1	6240	tags=47%, list=32%, signal=69%
GOBP_DETECTION_OF_CALCIUM_ION	10	0.678276	1.46757	0.0518518	0.19712	1	3148	tags=50%, list=16%, signal=60%
GOBP_DETECTION_OF_CELL_DENSITY	9	0.458474	0.960227	0.5311	0.744263	1	3505	tags=33%, list=18%, signal=41%
GOBP_DETECTION_OF_CHEMICAL_STIMULUS	41	0.387849	1.16185	0.227141	0.508629	1	3148	tags=27%, list=16%, signal=32%
GOBP_DETECTION_OF_CHEMICAL_STIMULUS_INVOLVED_IN_SENSORY_PERCEPTION_OF_SMELL	2	0.952829	1.38272	0.0282101	0.27737	1	58	tags=50%, list=0%, signal=50%
GOBP_DETECTION_OF_EXTERNAL_BIOTIC_STIMULUS	24	0.319531	0.846333	0.688601	0.869329	1	5993	tags=50%, list=31%, signal=72%
GOBP_DETECTION_OF_EXTERNAL_STIMULUS	107	0.316514	1.11732	0.226168	0.554518	1	3276	tags=24%, list=17%, signal=29%
GOBP_DETECTION_OF_LIGHT_STIMULUS	35	0.447177	1.30232	0.123692	0.356683	1	3124	tags=34%, list=16%, signal=41%
GOBP_DETECTION_OF_LIGHT_STIMULUS_INVOLVED_IN_SENSORY_PERCEPTION	17	0.346073	0.856331	0.665438	0.861666	1	3033	tags=35%, list=16%, signal=42%
GOBP_DETECTION_OF_LIPOPOLYSACCHARIDE	6	0.545105	1.0251	0.467422	0.662281	1	1910	tags=33%, list=10%, signal=37%
GOBP_DETECTION_OF_MECHANICAL_STIMULUS	59	0.238479	0.763626	0.874391	0.934699	1	1119	tags=8%, list=6%, signal=9%
GOBP_DETECTION_OF_MECHANICAL_STIMULUS_INVOLVED_IN_SENSORY_PERCEPTION	48	0.239768	0.730712	0.920829	0.95075	1	649	tags=6%, list=3%, signal=6%
GOBP_DETECTION_OF_MECHANICAL_STIMULUS_INVOLVED_IN_SENSORY_PERCEPTION_OF_PAIN	24	0.381015	1.0218	0.437739	0.666513	1	4817	tags=38%, list=25%, signal=50%
GOBP_DETECTION_OF_MOLECULE_OF_BACTERIAL_ORIGIN	14	0.52075	1.23321	0.208373	0.427311	1	5841	tags=57%, list=30%, signal=82%
GOBP_DETECTION_OF_STIMULUS	165	0.313585	1.1564	0.170956	0.513608	1	3148	tags=23%, list=16%, signal=27%
GOBP_DETECTION_OF_STIMULUS_INVOLVED_IN_SENSORY_PERCEPTION_OF_PAIN	36	0.370542	1.07079	0.33711	0.609267	1	3572	tags=28%, list=18%, signal=34%
GOBP_DETECTION_OF_TEMPERATURE_STIMULUS	26	0.455293	1.23331	0.180389	0.427645	1	2536	tags=31%, list=13%, signal=35%
GOBP_DETECTION_OF_TEMPERATURE_STIMULUS_INVOLVED_IN_SENSORY_PERCEPTION_OF_PAIN	21	0.445463	1.15421	0.287796	0.515236	1	3276	tags=29%, list=17%, signal=34%
GOBP_DETECTION_OF_TEMPERATURE_STIMULUS_INVOLVED_IN_THERMOCEPTION	3	0.76213	1.20838	0.238748	0.45411	1	2043	tags=67%, list=11%, signal=75%
GOBP_DETERMINATION_OF_ADULT_LIFESPAN	47	0.302108	0.93712	0.572674	0.772901	1	2516	tags=21%, list=13%, signal=24%
GOBP_DETERMINATION_OF_DIGESTIVE_TRACT_LEFT_RIGHT_ASYMMETRY	7	0.360735	0.704934	0.839437	0.962492	1	4024	tags=43%, list=21%, signal=54%
GOBP_DETERMINATION_OF_DORSAL_VENTRAL_ASYMMETRY	10	0.673988	1.45094	0.0606936	0.210242	1	357	tags=20%, list=2%, signal=20%
GOBP_DETERMINATION_OF_LIVER_LEFT_RIGHT_ASYMMETRY	6	0.500681	0.945832	0.554399	0.762971	1	3930	tags=50%, list=20%, signal=63%
GOBP_DETERMINATION_OF_PANCREATIC_LEFT_RIGHT_ASYMMETRY	5	0.338403	0.607927	0.904807	0.986345	1	3930	tags=40%, list=20%, signal=50%
GOBP_DETOXIFICATION_OF_CADMIUM_ION	5	0.435919	0.785082	0.744048	0.92211	1	1391	tags=20%, list=7%, signal=22%
GOBP_DEVELOPMENT_OF_PRIMARY_FEMALE_SEXUAL_CHARACTERISTICS	110	0.250825	0.885752	0.732845	0.831594	1	3931	tags=26%, list=20%, signal=33%
GOBP_DEVELOPMENT_OF_PRIMARY_SEXUAL_CHARACTERISTICS	196	0.228753	0.869635	0.797007	0.849347	1	1974	tags=13%, list=10%, signal=15%
GOBP_DEVELOPMENT_OF_SECONDARY_FEMALE_SEXUAL_CHARACTERISTICS	9	0.520954	1.0933	0.359784	0.583028	1	1143	tags=22%, list=6%, signal=24%
GOBP_DEVELOPMENT_OF_SECONDARY_SEXUAL_CHARACTERISTICS	12	0.469178	1.06086	0.396947	0.619492	1	3819	tags=42%, list=20%, signal=52%
GOBP_DEVELOPMENTAL_CELL_GROWTH	270	0.362616	1.42795	0.00450857	0.234524	1	3349	tags=33%, list=17%, signal=39%
GOBP_DEVELOPMENTAL_GROWTH_INVOLVED_IN_MORPHOGENESIS	272	0.310142	1.20797	0.0694698	0.45418	1	3067	tags=29%, list=16%, signal=34%
GOBP_DEVELOPMENTAL_MATURATION	326	0.283362	1.13048	0.151706	0.539735	1	2003	tags=18%, list=10%, signal=20%
GOBP_DGMP_METABOLIC_PROCESS	11	0.560476	1.25142	0.207129	0.407398	1	2546	tags=36%, list=13%, signal=42%
GOBP_DIACYLGLYCEROL_METABOLIC_PROCESS	25	0.507546	1.3755	0.0948435	0.285038	1	2072	tags=28%, list=11%, signal=31%
GOBP_DIAPHRAGM_DEVELOPMENT	6	0.713557	1.33869	0.141188	0.321756	1	1813	tags=33%, list=9%, signal=37%
GOBP_DICARBOXYLIC_ACID_BIOSYNTHETIC_PROCESS	10	0.257391	0.553207	0.949402	0.992311	1	2822	tags=20%, list=15%, signal=23%
GOBP_DICHOTOMOUS_SUBDIVISION_OF_AN_EPITHELIAL_TERMINAL_UNIT	9	0.26116	0.543145	0.957975	0.994018	1	4028	tags=33%, list=21%, signal=42%
GOBP_DICHOTOMOUS_SUBDIVISION_OF_TERMINAL_UNITS_INVOLVED_IN_SALIVARY_GLAND_BRANCHING	5	0.553704	1.00409	0.501438	0.690943	1	4028	tags=60%, list=21%, signal=76%
GOBP_DISTAL_CONVOLUTED_TUBULE_DEVELOPMENT	2	0.838029	1.22755	0.198077	0.433177	1	297	tags=50%, list=2%, signal=51%
GOBP_DISTAL_TUBULE_DEVELOPMENT	7	0.690017	1.3799	0.126633	0.279819	1	1163	tags=43%, list=6%, signal=46%
GOBP_DNA_CATABOLIC_PROCESS	24	0.362233	0.965216	0.505213	0.739342	1	5823	tags=42%, list=30%, signal=59%
GOBP_DNA_CONFORMATION_CHANGE	60	0.370714	1.176	0.2	0.492756	1	7070	tags=50%, list=36%, signal=78%
GOBP_DNA_DEALKYLATION	24	0.516947	1.38359	0.0746966	0.276023	1	6031	tags=63%, list=31%, signal=91%
GOBP_DNA_DEALKYLATION_INVOLVED_IN_DNA_REPAIR	7	0.513301	1.00645	0.459903	0.687429	1	2701	tags=29%, list=14%, signal=33%
GOBP_DNA_DOUBLE_STRAND_BREAK_PROCESSING	19	0.260897	0.668919	0.909427	0.972971	1	6178	tags=42%, list=32%, signal=62%
GOBP_DNA_DUPLEX_UNWINDING	45	0.365494	1.1079	0.286512	0.567133	1	7070	tags=53%, list=36%, signal=84%
GOBP_DNA_ENDOREDUPLICATION	5	0.471811	0.853407	0.661582	0.863604	1	2941	tags=20%, list=15%, signal=24%
GOBP_DNA_INTEGRITY_CHECKPOINT_SIGNALING	122	0.291661	1.04676	0.348189	0.637268	1	4083	tags=26%, list=21%, signal=33%
GOBP_DNA_METHYLATION	42	0.380784	1.1364	0.252592	0.533627	1	4406	tags=36%, list=23%, signal=46%
GOBP_DNA_METHYLATION_ON_CYTOSINE	5	0.59385	1.07115	0.439189	0.608833	1	3019	tags=40%, list=16%, signal=47%
GOBP_DNA_MODIFICATION	71	0.381127	1.25159	0.118199	0.407163	1	4406	tags=34%, list=23%, signal=44%
GOBP_DNA_RECOMBINATION	298	0.229667	0.906655	0.754433	0.808212	1	4546	tags=26%, list=23%, signal=33%
GOBP_DNA_REPAIR_COMPLEX_ASSEMBLY	5	0.265183	0.479192	0.978661	0.99863	1	4088	tags=40%, list=21%, signal=51%
GOBP_DNA_REPLICATION	263	0.258991	1.01076	0.41065	0.681312	1	3498	tags=20%, list=18%, signal=24%
GOBP_DNA_REPLICATION_INITIATION	30	0.18177	0.514246	0.994307	0.996407	1	2064	tags=10%, list=11%, signal=11%
GOBP_DNA_STRAND_ELONGATION	36	0.211389	0.619909	0.966324	0.984356	1	6151	tags=31%, list=32%, signal=45%
GOBP_DNA_STRAND_RESECTION_INVOLVED_IN_REPLICATION_FORK_PROCESSING	8	0.70704	1.44617	0.0721248	0.215613	1	2485	tags=38%, list=13%, signal=43%
GOBP_DNA_SYNTHESIS_INVOLVED_IN_DNA_REPAIR	32	0.30566	0.856726	0.695777	0.861322	1	2133	tags=16%, list=11%, signal=18%
GOBP_DNA_TEMPLATED_DNA_REPLICATION	146	0.249564	0.918482	0.655417	0.795348	1	3498	tags=18%, list=18%, signal=22%
GOBP_DNA_TEMPLATED_DNA_REPLICATION_MAINTENANCE_OF_FIDELITY	53	0.397283	1.23841	0.142066	0.421245	1	6440	tags=42%, list=33%, signal=62%
GOBP_DNA_TEMPLATED_TRANSCRIPTION_ELONGATION	112	0.35948	1.2643	0.0830973	0.395053	1	3338	tags=24%, list=17%, signal=29%
GOBP_DNA_TEMPLATED_TRANSCRIPTION_INITIATION	128	0.282889	1.00959	0.419786	0.682822	1	4270	tags=29%, list=22%, signal=37%
GOBP_DNA_TEMPLATED_TRANSCRIPTION_TERMINATION	26	0.408226	1.10265	0.307551	0.572848	1	1795	tags=19%, list=9%, signal=21%
GOBP_DNA_TOPOLOGICAL_CHANGE	8	0.627962	1.27234	0.195817	0.386944	1	1020	tags=25%, list=5%, signal=26%
GOBP_DOLICHOL_LINKED_OLIGOSACCHARIDE_BIOSYNTHETIC_PROCESS	11	0.734501	1.62816	0.015873	0.0794593	1	339	tags=18%, list=2%, signal=18%
GOBP_DOLICHOL_METABOLIC_PROCESS	13	0.668812	1.54779	0.0277521	0.131867	1	339	tags=15%, list=2%, signal=16%
GOBP_DOPAMINE_RECEPTOR_SIGNALING_PATHWAY	37	0.568433	1.66859	0.00366636	0.0580608	1	941	tags=24%, list=5%, signal=26%
GOBP_DOPAMINE_SECRETION	45	0.585248	1.77105	0	0.0260668	1	2754	tags=40%, list=14%, signal=47%
GOBP_DOPAMINE_TRANSPORT	59	0.505776	1.60108	0.00956023	0.0954791	1	2983	tags=36%, list=15%, signal=42%
GOBP_DOPAMINERGIC_NEURON_AXON_GUIDANCE	6	0.518895	0.981102	0.524857	0.716596	1	2543	tags=33%, list=13%, signal=38%
GOBP_DOPAMINERGIC_NEURON_DIFFERENTIATION	33	0.292962	0.82839	0.725264	0.885647	1	2978	tags=30%, list=15%, signal=36%
GOBP_DORSAL_ROOT_GANGLION_DEVELOPMENT	5	0.809235	1.46773	0.0522814	0.197256	1	2806	tags=60%, list=14%, signal=70%
GOBP_DORSAL_SPINAL_CORD_DEVELOPMENT	13	0.188385	0.431061	0.994419	0.998937	1	3982	tags=15%, list=21%, signal=19%
GOBP_DORSAL_VENTRAL_PATTERN_FORMATION	87	0.328594	1.10832	0.258702	0.566853	1	3048	tags=20%, list=16%, signal=23%
GOBP_DOSAGE_COMPENSATION	34	0.455683	1.31556	0.100856	0.343581	1	4815	tags=38%, list=25%, signal=51%
GOBP_DOUBLE_STRAND_BREAK_REPAIR	287	0.255415	1.00674	0.417266	0.687019	1	4601	tags=29%, list=24%, signal=37%
GOBP_DOUBLE_STRAND_BREAK_REPAIR_VIA_CLASSICAL_NONHOMOLOGOUS_END_JOINING	6	0.614719	1.14854	0.332386	0.521684	1	3873	tags=67%, list=20%, signal=83%
GOBP_DTMP_CATABOLIC_PROCESS	7	0.287158	0.564362	0.940019	0.99031	1	6067	tags=29%, list=31%, signal=42%
GOBP_DUCTUS_ARTERIOSUS_CLOSURE	6	0.606005	1.15189	0.322866	0.518106	1	1163	tags=33%, list=6%, signal=35%
GOBP_EAR_DEVELOPMENT	213	0.29724	1.13086	0.173395	0.539273	1	2249	tags=18%, list=12%, signal=20%
GOBP_EARLY_ENDOSOME_TO_GOLGI_TRANSPORT	9	0.518863	1.07734	0.41556	0.602466	1	1790	tags=44%, list=9%, signal=49%
GOBP_EARLY_ENDOSOME_TO_RECYCLING_ENDOSOME_TRANSPORT	5	0.856585	1.54622	0.0218216	0.133328	1	2188	tags=80%, list=11%, signal=90%
GOBP_EATING_BEHAVIOR	39	0.44684	1.32366	0.1	0.336243	1	2285	tags=23%, list=12%, signal=26%
GOBP_ECTODERM_FORMATION	4	0.754426	1.30404	0.159462	0.354937	1	442	tags=25%, list=2%, signal=26%
GOBP_ECTODERMAL_CELL_DIFFERENTIATION	5	0.726476	1.29984	0.154215	0.359289	1	1688	tags=40%, list=9%, signal=44%
GOBP_ECTODERMAL_PLACODE_DEVELOPMENT	15	0.355663	0.84636	0.673258	0.869552	1	1256	tags=20%, list=6%, signal=21%
GOBP_EGG_ACTIVATION	10	0.477683	1.04144	0.448536	0.642022	1	2713	tags=30%, list=14%, signal=35%
GOBP_EMBRYONIC_APPENDAGE_MORPHOGENESIS	121	0.295058	1.05889	0.32243	0.622214	1	4118	tags=29%, list=21%, signal=36%
GOBP_EMBRYONIC_AXIS_SPECIFICATION	40	0.420801	1.24421	0.159624	0.41447	1	3756	tags=28%, list=19%, signal=34%
GOBP_EMBRYONIC_BODY_MORPHOGENESIS	15	0.491293	1.17196	0.266099	0.497922	1	2083	tags=40%, list=11%, signal=45%
GOBP_EMBRYONIC_BRAIN_DEVELOPMENT	22	0.439443	1.13975	0.28335	0.530774	1	1455	tags=14%, list=8%, signal=15%
GOBP_EMBRYONIC_CAMERA_TYPE_EYE_MORPHOGENESIS	28	0.342855	0.952591	0.524119	0.754155	1	2244	tags=25%, list=12%, signal=28%
GOBP_EMBRYONIC_CLEAVAGE	8	0.365633	0.751186	0.791864	0.940921	1	2466	tags=38%, list=13%, signal=43%
GOBP_EMBRYONIC_DIGIT_MORPHOGENESIS	65	0.335411	1.08408	0.322702	0.593879	1	2110	tags=22%, list=11%, signal=24%
GOBP_EMBRYONIC_EYE_MORPHOGENESIS	33	0.3292	0.932405	0.567854	0.779858	1	2374	tags=24%, list=12%, signal=28%
GOBP_EMBRYONIC_FORELIMB_MORPHOGENESIS	28	0.436054	1.18017	0.242593	0.486997	1	4118	tags=43%, list=21%, signal=54%
GOBP_EMBRYONIC_HEART_TUBE_DEVELOPMENT	78	0.332901	1.10594	0.271442	0.569171	1	3127	tags=23%, list=16%, signal=27%
GOBP_EMBRYONIC_HEART_TUBE_LEFT_RIGHT_PATTERN_FORMATION	5	0.518641	0.942532	0.563367	0.766275	1	5995	tags=80%, list=31%, signal=116%
GOBP_EMBRYONIC_HEART_TUBE_MORPHOGENESIS	58	0.296606	0.939929	0.563959	0.769496	1	3048	tags=21%, list=16%, signal=24%
GOBP_EMBRYONIC_HINDLIMB_MORPHOGENESIS	30	0.442786	1.23644	0.181066	0.42366	1	2374	tags=30%, list=12%, signal=34%
GOBP_EMBRYONIC_PATTERN_SPECIFICATION	73	0.355166	1.17835	0.187739	0.489836	1	3930	tags=30%, list=20%, signal=38%
GOBP_EMBRYONIC_PROCESS_INVOLVED_IN_FEMALE_PREGNANCY	10	0.58373	1.26593	0.192817	0.394094	1	852	tags=20%, list=4%, signal=21%
GOBP_EMBRYONIC_RETINA_MORPHOGENESIS_IN_CAMERA_TYPE_EYE	7	0.48836	0.962386	0.517476	0.741721	1	2048	tags=29%, list=11%, signal=32%
GOBP_EMBRYONIC_SKELETAL_JOINT_DEVELOPMENT	12	0.628199	1.4208	0.0822551	0.241929	1	1860	tags=33%, list=10%, signal=37%
GOBP_EMBRYONIC_SKELETAL_JOINT_MORPHOGENESIS	9	0.45427	0.959099	0.541858	0.745913	1	1833	tags=22%, list=9%, signal=25%
GOBP_EMBRYONIC_SKELETAL_SYSTEM_DEVELOPMENT	105	0.376379	1.31337	0.0597427	0.346502	1	2244	tags=21%, list=12%, signal=24%
GOBP_EMBRYONIC_SKELETAL_SYSTEM_MORPHOGENESIS	74	0.29722	0.982097	0.495283	0.714668	1	4428	tags=32%, list=23%, signal=42%
GOBP_EMBRYONIC_VISCEROCRANIUM_MORPHOGENESIS	8	0.605813	1.21807	0.246937	0.442464	1	3983	tags=50%, list=21%, signal=63%
GOBP_ENDOCANNABINOID_SIGNALING_PATHWAY	5	0.417701	0.766043	0.760267	0.933135	1	1434	tags=20%, list=7%, signal=22%
GOBP_ENDOCRINE_SYSTEM_DEVELOPMENT	102	0.284361	0.985215	0.486891	0.710777	1	730	tags=8%, list=4%, signal=8%
GOBP_ENDOCYTIC_RECYCLING	85	0.433574	1.46749	0.0144535	0.19712	1	2526	tags=28%, list=13%, signal=32%
GOBP_ENDODERM_DEVELOPMENT	62	0.363261	1.16136	0.203653	0.509055	1	3501	tags=26%, list=18%, signal=31%
GOBP_ENDODERM_FORMATION	34	0.352894	1.01496	0.431193	0.675647	1	2842	tags=18%, list=15%, signal=21%
GOBP_ENDODERMAL_CELL_DIFFERENTIATION	25	0.300924	0.802153	0.761208	0.909149	1	1120	tags=8%, list=6%, signal=8%
GOBP_ENDOLYSOSOMAL_TOLL_LIKE_RECEPTOR_SIGNALING_PATHWAY	39	0.205013	0.603293	0.985294	0.98652	1	4077	tags=23%, list=21%, signal=29%
GOBP_ENDOPLASMIC_RETICULUM_LOCALIZATION	11	0.399617	0.878421	0.632129	0.838511	1	5745	tags=36%, list=30%, signal=52%
GOBP_ENDOPLASMIC_RETICULUM_MEMBRANE_ORGANIZATION	13	0.462143	1.06583	0.415888	0.614312	1	4116	tags=38%, list=21%, signal=49%
GOBP_ENDOPLASMIC_RETICULUM_ORGANIZATION	95	0.206425	0.71196	0.982293	0.959528	1	4116	tags=21%, list=21%, signal=27%
GOBP_ENDOPLASMIC_RETICULUM_PLASMA_MEMBRANE_TETHERING	6	0.353879	0.664109	0.866667	0.973587	1	5745	tags=50%, list=30%, signal=71%
GOBP_ENDOPLASMIC_RETICULUM_TO_GOLGI_VESICLE_MEDIATED_TRANSPORT	119	0.245467	0.872876	0.761208	0.84547	1	4753	tags=33%, list=25%, signal=43%
GOBP_ENDOPLASMIC_RETICULUM_TUBULAR_NETWORK_FORMATION	5	0.674374	1.2073	0.273229	0.454406	1	4423	tags=60%, list=23%, signal=78%
GOBP_ENDOPLASMIC_RETICULUM_TUBULAR_NETWORK_ORGANIZATION	21	0.41708	1.07384	0.354597	0.605954	1	4423	tags=48%, list=23%, signal=62%
GOBP_ENDOSOMAL_TRANSPORT	233	0.368509	1.41963	0.00535714	0.243328	1	2545	tags=22%, list=13%, signal=25%
GOBP_ENDOSOMAL_VESICLE_FUSION	9	0.536663	1.11737	0.342986	0.554542	1	3247	tags=33%, list=17%, signal=40%
GOBP_ENDOSOME_ORGANIZATION	65	0.34488	1.10762	0.281544	0.566868	1	2188	tags=20%, list=11%, signal=22%
GOBP_ENDOSOME_TO_LYSOSOME_TRANSPORT	69	0.340376	1.11283	0.258721	0.560332	1	3689	tags=28%, list=19%, signal=34%
GOBP_ENDOSOME_TO_PLASMA_MEMBRANE_PROTEIN_TRANSPORT	21	0.666416	1.70693	0.0055918	0.0444774	1	2188	tags=48%, list=11%, signal=54%
GOBP_ENDOTHELIAL_CELL_ACTIVATION	10	0.429545	0.938325	0.550235	0.771253	1	3938	tags=40%, list=20%, signal=50%
GOBP_ENDOTHELIN_RECEPTOR_SIGNALING_PATHWAY	10	0.41941	0.909743	0.580224	0.805142	1	941	tags=20%, list=5%, signal=21%
GOBP_ENTEROENDOCRINE_CELL_DIFFERENTIATION	29	0.337887	0.940847	0.548059	0.769033	1	306	tags=10%, list=2%, signal=10%
GOBP_ENTRAINMENT_OF_CIRCADIAN_CLOCK	25	0.575937	1.56623	0.0182342	0.117936	1	3802	tags=44%, list=20%, signal=55%
GOBP_ENTRY_OF_BACTERIUM_INTO_HOST_CELL	6	0.309245	0.57966	0.924242	0.988551	1	5993	tags=50%, list=31%, signal=72%
GOBP_ENUCLEATE_ERYTHROCYTE_DIFFERENTIATION	8	0.468644	0.958855	0.527881	0.746194	1	7870	tags=75%, list=41%, signal=126%
GOBP_EOSINOPHIL_CHEMOTAXIS	12	0.451312	1.00147	0.484478	0.693292	1	1959	tags=25%, list=10%, signal=28%
GOBP_EOSINOPHIL_MIGRATION	16	0.358812	0.864199	0.648362	0.853807	1	1959	tags=19%, list=10%, signal=21%
GOBP_EPHRIN_RECEPTOR_SIGNALING_PATHWAY	38	0.478615	1.4032	0.0603774	0.255895	1	1456	tags=29%, list=8%, signal=31%
GOBP_EPIDERMAL_CELL_DIFFERENTIATION	161	0.253046	0.940658	0.6	0.769059	1	2003	tags=12%, list=10%, signal=14%
GOBP_EPIGENETIC_PROGRAMING_OF_FEMALE_PRONUCLEUS	4	0.609172	1.06409	0.44165	0.615956	1	4126	tags=50%, list=21%, signal=64%
GOBP_EPIGENETIC_PROGRAMING_OF_MALE_PRONUCLEUS	3	0.255591	0.415892	0.996012	0.998947	1	4406	tags=33%, list=23%, signal=43%
GOBP_EPIGENETIC_PROGRAMMING_IN_THE_ZYGOTIC_PRONUCLEI	12	0.406346	0.926621	0.565421	0.787715	1	6418	tags=50%, list=33%, signal=75%
GOBP_EPIGENETIC_REGULATION_OF_GENE_EXPRESSION	197	0.237246	0.898061	0.727014	0.817375	1	4444	tags=26%, list=23%, signal=33%
GOBP_EPINEPHRINE_SECRETION	9	0.678267	1.44915	0.0785855	0.21213	1	1673	tags=33%, list=9%, signal=36%
GOBP_EPINEPHRINE_TRANSPORT	11	0.505514	1.1274	0.324503	0.543659	1	1673	tags=27%, list=9%, signal=30%
GOBP_EPITHELIAL_CELL_APOPTOTIC_PROCESS	136	0.223282	0.811623	0.898473	0.901527	1	2356	tags=16%, list=12%, signal=18%
GOBP_EPITHELIAL_CELL_CELL_ADHESION	16	0.315728	0.7497	0.800186	0.941408	1	2404	tags=13%, list=12%, signal=14%
GOBP_EPITHELIAL_CELL_MATURATION	21	0.379598	0.99005	0.464921	0.706108	1	779	tags=19%, list=4%, signal=20%
GOBP_EPITHELIAL_CELL_PROLIFERATION_INVOLVED_IN_LUNG_MORPHOGENESIS	11	0.40563	0.905383	0.588785	0.809732	1	447	tags=18%, list=2%, signal=19%
GOBP_EPITHELIAL_CELL_PROLIFERATION_INVOLVED_IN_MAMMARY_GLAND_DUCT_ELONGATION	3	0.770654	1.2365	0.209693	0.42367	1	2910	tags=67%, list=15%, signal=78%
GOBP_EPITHELIAL_CILIUM_MOVEMENT_INVOLVED_IN_DETERMINATION_OF_LEFT_RIGHT_ASYMMETRY	11	0.563126	1.23114	0.235675	0.429002	1	5167	tags=55%, list=27%, signal=74%
GOBP_EPITHELIAL_STRUCTURE_MAINTENANCE	25	0.351388	0.938731	0.565177	0.770733	1	2932	tags=24%, list=15%, signal=28%
GOBP_EPITHELIAL_TO_MESENCHYMAL_TRANSITION	154	0.261686	0.961686	0.550141	0.742375	1	2305	tags=19%, list=12%, signal=21%
GOBP_EQUILIBRIOCEPTION	9	0.346764	0.727454	0.804854	0.952502	1	108	tags=11%, list=1%, signal=11%
GOBP_ERAD_PATHWAY	106	0.230385	0.81113	0.893855	0.902031	1	3998	tags=22%, list=21%, signal=27%
GOBP_ERBB_SIGNALING_PATHWAY	111	0.318021	1.12713	0.236059	0.543844	1	1262	tags=11%, list=7%, signal=11%
GOBP_ERBB2_SIGNALING_PATHWAY	21	0.44594	1.15705	0.266478	0.512698	1	1262	tags=19%, list=7%, signal=20%
GOBP_ERBB3_SIGNALING_PATHWAY	14	0.458668	1.06921	0.386385	0.610081	1	1262	tags=21%, list=7%, signal=23%
GOBP_ERBB4_ERBB4_SIGNALING_PATHWAY	6	0.563934	1.07173	0.405123	0.608579	1	2757	tags=33%, list=14%, signal=39%
GOBP_ERBB4_SIGNALING_PATHWAY	9	0.612503	1.29016	0.178877	0.370395	1	482	tags=22%, list=2%, signal=23%
GOBP_ERK5_CASCADE	6	0.513436	0.961548	0.542226	0.742285	1	900	tags=17%, list=5%, signal=17%
GOBP_ERROR_PRONE_TRANSLESION_SYNTHESIS	9	0.410864	0.85733	0.627505	0.861006	1	2133	tags=33%, list=11%, signal=37%
GOBP_ESTABLISHMENT_OF_CENTROSOME_LOCALIZATION	9	0.743881	1.57001	0.0248619	0.11553	1	2551	tags=44%, list=13%, signal=51%
GOBP_ESTABLISHMENT_OF_ENDOTHELIAL_INTESTINAL_BARRIER	12	0.540585	1.20699	0.244722	0.45481	1	1512	tags=33%, list=8%, signal=36%
GOBP_ESTABLISHMENT_OF_GOLGI_LOCALIZATION	7	0.664291	1.32236	0.161616	0.337492	1	5528	tags=71%, list=29%, signal=100%
GOBP_ESTABLISHMENT_OF_LEFT_RIGHT_ASYMMETRY	5	0.585293	1.0625	0.422495	0.617877	1	5892	tags=80%, list=30%, signal=115%
GOBP_ESTABLISHMENT_OF_MITOCHONDRION_LOCALIZATION	31	0.40796	1.14799	0.268915	0.522521	1	2118	tags=32%, list=11%, signal=36%
GOBP_ESTABLISHMENT_OF_MITOCHONDRION_LOCALIZATION_MICROTUBULE_MEDIATED	24	0.476483	1.2761	0.139815	0.383723	1	3185	tags=42%, list=16%, signal=50%
GOBP_ESTABLISHMENT_OF_MITOTIC_SPINDLE_LOCALIZATION	40	0.297723	0.882721	0.65709	0.834269	1	3767	tags=25%, list=19%, signal=31%
GOBP_ESTABLISHMENT_OF_ORGANELLE_LOCALIZATION	443	0.294035	1.20634	0.0317893	0.455559	1	2932	tags=22%, list=15%, signal=25%
GOBP_ESTABLISHMENT_OF_PIGMENT_GRANULE_LOCALIZATION	14	0.505089	1.18948	0.258813	0.475592	1	2545	tags=43%, list=13%, signal=49%
GOBP_ESTABLISHMENT_OF_PROTEIN_LOCALIZATION_TO_ENDOPLASMIC_RETICULUM	47	0.412343	1.2566	0.144749	0.401963	1	2382	tags=15%, list=12%, signal=17%
GOBP_ESTABLISHMENT_OF_PROTEIN_LOCALIZATION_TO_MEMBRANE	256	0.269761	1.05357	0.294388	0.62883	1	2382	tags=17%, list=12%, signal=19%
GOBP_ESTABLISHMENT_OF_PROTEIN_LOCALIZATION_TO_ORGANELLE	420	0.288964	1.18692	0.0612613	0.478554	1	3528	tags=23%, list=18%, signal=28%
GOBP_ESTABLISHMENT_OF_PROTEIN_LOCALIZATION_TO_PLASMA_MEMBRANE	67	0.394381	1.27209	0.111511	0.387344	1	2356	tags=30%, list=12%, signal=34%
GOBP_ESTABLISHMENT_OF_PROTEIN_LOCALIZATION_TO_VACUOLE	59	0.400294	1.27649	0.102616	0.383194	1	3247	tags=31%, list=17%, signal=37%
GOBP_ESTABLISHMENT_OF_RNA_LOCALIZATION	133	0.35452	1.27986	0.0635945	0.379574	1	4723	tags=31%, list=24%, signal=40%
GOBP_ESTABLISHMENT_OF_SISTER_CHROMATID_COHESION	5	0.699718	1.28564	0.167961	0.374631	1	4783	tags=80%, list=25%, signal=106%
GOBP_ESTABLISHMENT_OF_TISSUE_POLARITY	63	0.360882	1.15954	0.211242	0.510001	1	2751	tags=24%, list=14%, signal=28%
GOBP_ESTABLISHMENT_OR_MAINTENANCE_OF_BIPOLAR_CELL_POLARITY	52	0.476731	1.47941	0.0216369	0.1871	1	2032	tags=23%, list=10%, signal=26%
GOBP_ESTABLISHMENT_OR_MAINTENANCE_OF_CELL_POLARITY	221	0.287018	1.10475	0.187977	0.570675	1	2223	tags=18%, list=11%, signal=20%
GOBP_ESTABLISHMENT_OR_MAINTENANCE_OF_CYTOSKELETON_POLARITY	9	0.500669	1.05993	0.421256	0.620476	1	130	tags=11%, list=1%, signal=11%
GOBP_ESTABLISHMENT_OR_MAINTENANCE_OF_MICROTUBULE_CYTOSKELETON_POLARITY	5	0.283017	0.518339	0.96	0.996259	1	13902	tags=100%, list=72%, signal=353%
GOBP_ESTROGEN_METABOLIC_PROCESS	19	0.433782	1.08187	0.366886	0.596028	1	4798	tags=42%, list=25%, signal=56%
GOBP_EXCITATORY_CHEMICAL_SYNAPTIC_TRANSMISSION	11	0.523256	1.15499	0.286501	0.515121	1	1707	tags=36%, list=9%, signal=40%
GOBP_EXCITATORY_POSTSYNAPTIC_POTENTIAL	91	0.543306	1.88306	0	0.00776025	0.701	2488	tags=36%, list=13%, signal=41%	synaptic transmission
GOBP_EXCITATORY_SYNAPSE_ASSEMBLY	38	0.503984	1.48595	0.0371747	0.181217	1	3494	tags=37%, list=18%, signal=45%
GOBP_EXOCYTIC_PROCESS	100	0.399847	1.3849	0.0295203	0.27517	1	3469	tags=34%, list=18%, signal=41%
GOBP_EXOCYTOSIS	347	0.374506	1.50225	0	0.168695	1	2791	tags=26%, list=14%, signal=30%
GOBP_EXONUCLEOLYTIC_CATABOLISM_OF_DEADENYLATED_MRNA	9	0.411351	0.86197	0.642322	0.857188	1	5665	tags=44%, list=29%, signal=63%
GOBP_EXPLORATION_BEHAVIOR	41	0.540933	1.5894	0.0127505	0.102881	1	1588	tags=32%, list=8%, signal=34%
GOBP_EXTRACELLULAR_REGULATION_OF_SIGNAL_TRANSDUCTION	10	0.542264	1.17872	0.259189	0.489267	1	64	tags=10%, list=0%, signal=10%
GOBP_EXTRACELLULAR_TRANSPORT	44	0.481395	1.4264	0.0479386	0.235867	1	4764	tags=48%, list=25%, signal=63%	motile cilium movement cerebrospinal
GOBP_EXTRACELLULAR_VESICLE_BIOGENESIS	24	0.321606	0.858518	0.673133	0.859839	1	3037	tags=29%, list=16%, signal=35%
GOBP_EXTRAEMBRYONIC_MEMBRANE_DEVELOPMENT	13	0.309715	0.717537	0.832703	0.957027	1	3264	tags=23%, list=17%, signal=28%
GOBP_EXTRINSIC_APOPTOTIC_SIGNALING_PATHWAY_VIA_DEATH_DOMAIN_RECEPTORS	74	0.303016	0.999	0.447139	0.696095	1	2042	tags=22%, list=11%, signal=24%
GOBP_EYE_MORPHOGENESIS	160	0.306068	1.13583	0.178538	0.533433	1	2520	tags=20%, list=13%, signal=23%
GOBP_EYE_PHOTORECEPTOR_CELL_DEVELOPMENT	34	0.523821	1.50637	0.0347032	0.165743	1	2456	tags=35%, list=13%, signal=40%
GOBP_EYE_PHOTORECEPTOR_CELL_DIFFERENTIATION	51	0.421413	1.30097	0.110911	0.358898	1	2456	tags=27%, list=13%, signal=31%
GOBP_EYE_PIGMENTATION	6	0.355726	0.672932	0.861641	0.97218	1	4023	tags=33%, list=21%, signal=42%
GOBP_EYELID_DEVELOPMENT_IN_CAMERA_TYPE_EYE	15	0.6324	1.5101	0.0448598	0.162152	1	1658	tags=27%, list=9%, signal=29%
GOBP_FACE_DEVELOPMENT	60	0.310109	0.98609	0.478341	0.710899	1	1244	tags=12%, list=6%, signal=12%
GOBP_FACIAL_NERVE_MORPHOGENESIS	8	0.821155	1.65869	0.00676328	0.0635341	1	1785	tags=50%, list=9%, signal=55%
GOBP_FACIAL_NERVE_STRUCTURAL_ORGANIZATION	7	0.849433	1.67383	0.00281955	0.0559459	1	1785	tags=57%, list=9%, signal=63%
GOBP_FACULTATIVE_HETEROCHROMATIN_FORMATION	44	0.149753	0.450274	0.999073	0.999207	1	4761	tags=25%, list=25%, signal=33%
GOBP_FARNESYL_DIPHOSPHATE_METABOLIC_PROCESS	5	0.583154	1.05283	0.443223	0.629358	1	462	tags=20%, list=2%, signal=20%
GOBP_FAT_CELL_DIFFERENTIATION	240	0.287448	1.12042	0.187223	0.55106	1	2314	tags=20%, list=12%, signal=23%
GOBP_FAT_CELL_PROLIFERATION	14	0.320207	0.744969	0.80916	0.944682	1	3178	tags=29%, list=16%, signal=34%
GOBP_FAT_SOLUBLE_VITAMIN_CATABOLIC_PROCESS	5	0.550974	1.00097	0.500492	0.694072	1	2534	tags=40%, list=13%, signal=46%
GOBP_FATTY_ACID_BETA_OXIDATION_USING_ACYL_COA_OXIDASE	3	0.449778	0.721306	0.818882	0.95551	1	679	tags=33%, list=4%, signal=35%
GOBP_FATTY_ACID_DERIVATIVE_BIOSYNTHETIC_PROCESS	18	0.517298	1.28997	0.158287	0.370363	1	852	tags=22%, list=4%, signal=23%
GOBP_FATTY_ACID_DERIVATIVE_METABOLIC_PROCESS	36	0.320774	0.93836	0.546065	0.771306	1	1815	tags=19%, list=9%, signal=21%
GOBP_FATTY_ACID_TRANSMEMBRANE_TRANSPORT	16	0.316214	0.772504	0.778968	0.930378	1	2042	tags=19%, list=11%, signal=21%
GOBP_FATTY_ACYL_COA_BIOSYNTHETIC_PROCESS	6	0.599622	1.13634	0.344106	0.53364	1	852	tags=33%, list=4%, signal=35%
GOBP_FATTY_ACYL_COA_METABOLIC_PROCESS	17	0.438111	1.0842	0.349817	0.593738	1	1815	tags=29%, list=9%, signal=32%
GOBP_FC_GAMMA_RECEPTOR_SIGNALING_PATHWAY	12	0.386466	0.875654	0.631678	0.842236	1	964	tags=25%, list=5%, signal=26%
GOBP_FC_RECEPTOR_SIGNALING_PATHWAY	15	0.35071	0.836188	0.690858	0.878297	1	964	tags=20%, list=5%, signal=21%
GOBP_FEAR_RESPONSE	59	0.584293	1.85078	0	0.0112681	0.887	2271	tags=46%, list=12%, signal=52%
GOBP_FEEDING_BEHAVIOR	103	0.423634	1.47646	0.00684262	0.190321	1	2285	tags=24%, list=12%, signal=27%
GOBP_FEMALE_GAMETE_GENERATION	152	0.260385	0.958568	0.55877	0.7466	1	3789	tags=25%, list=20%, signal=31%
GOBP_FEMALE_GENITALIA_DEVELOPMENT	18	0.37673	0.922871	0.567925	0.792144	1	3746	tags=33%, list=19%, signal=41%
GOBP_FEMALE_MATING_BEHAVIOR	11	0.752732	1.66427	0.0105062	0.060691	1	606	tags=36%, list=3%, signal=38%
GOBP_FEMALE_MEIOTIC_NUCLEAR_DIVISION	40	0.29375	0.853881	0.702392	0.863683	1	2516	tags=20%, list=13%, signal=23%
GOBP_FEMALE_SEX_DIFFERENTIATION	125	0.262122	0.934551	0.602421	0.777055	1	3931	tags=26%, list=20%, signal=33%
GOBP_FERMENTATION	6	0.586566	1.12488	0.359699	0.546256	1	2822	tags=33%, list=15%, signal=39%
GOBP_FEVER_GENERATION	9	0.53027	1.11032	0.357965	0.564033	1	894	tags=22%, list=5%, signal=23%
GOBP_FIBROBLAST_APOPTOTIC_PROCESS	31	0.309921	0.869455	0.6621	0.848719	1	4196	tags=32%, list=22%, signal=41%
GOBP_FIBROBLAST_GROWTH_FACTOR_PRODUCTION	11	0.718011	1.60278	0.0266413	0.0951194	1	386	tags=18%, list=2%, signal=19%
GOBP_FILOPODIUM_ASSEMBLY	71	0.336002	1.10204	0.277273	0.573601	1	2378	tags=25%, list=12%, signal=29%
GOBP_FLAVIN_CONTAINING_COMPOUND_METABOLIC_PROCESS	5	0.346575	0.626765	0.89751	0.983351	1	12670	tags=100%, list=65%, signal=288%
GOBP_FLOOR_PLATE_DEVELOPMENT	9	0.510127	1.09615	0.354244	0.580394	1	13	tags=11%, list=0%, signal=11%
GOBP_FOLATE_TRANSMEMBRANE_TRANSPORT	5	0.579417	1.06725	0.42723	0.612917	1	7451	tags=80%, list=38%, signal=130%
GOBP_FOLLICLE_STIMULATING_HORMONE_SECRETION	8	0.460834	0.950745	0.545206	0.756458	1	277	tags=13%, list=1%, signal=13%
GOBP_FOLLICLE_STIMULATING_HORMONE_SIGNALING_PATHWAY	5	0.471941	0.84562	0.674687	0.869945	1	725	tags=20%, list=4%, signal=21%
GOBP_FOREBRAIN_CELL_MIGRATION	71	0.488252	1.60002	0.00549451	0.0963818	1	2604	tags=31%, list=13%, signal=36%
GOBP_FOREBRAIN_DEVELOPMENT	379	0.36509	1.47637	0	0.190347	1	3067	tags=28%, list=16%, signal=32%
GOBP_FOREBRAIN_MORPHOGENESIS	14	0.465566	1.08498	0.374885	0.593282	1	2978	tags=29%, list=15%, signal=34%
GOBP_FOREBRAIN_NEURON_DEVELOPMENT	29	0.467521	1.28067	0.137274	0.37882	1	1447	tags=28%, list=7%, signal=30%
GOBP_FOREBRAIN_NEURON_DIFFERENTIATION	51	0.346013	1.06985	0.328625	0.610348	1	1631	tags=22%, list=8%, signal=23%
GOBP_FOREGUT_MORPHOGENESIS	11	0.459924	1.01968	0.442202	0.66918	1	2146	tags=27%, list=11%, signal=31%
GOBP_FORELIMB_MORPHOGENESIS	38	0.42055	1.23951	0.160115	0.419723	1	4118	tags=45%, list=21%, signal=57%
GOBP_FORMATION_OF_PRIMARY_GERM_LAYER	86	0.252995	0.850061	0.765918	0.866734	1	2842	tags=15%, list=15%, signal=18%
GOBP_FORMATION_OF_TRANSLATION_PREINITIATION_COMPLEX	10	0.467416	1.01474	0.45933	0.675743	1	425	tags=10%, list=2%, signal=10%
GOBP_FRUCTOSE_1_6_BISPHOSPHATE_METABOLIC_PROCESS	6	0.392607	0.728526	0.80859	0.951664	1	4259	tags=50%, list=22%, signal=64%
GOBP_FRUCTOSE_TRANSMEMBRANE_TRANSPORT	4	0.370741	0.632344	0.892963	0.981971	1	6950	tags=75%, list=36%, signal=117%
GOBP_FUNGIFORM_PAPILLA_DEVELOPMENT	6	0.412616	0.788416	0.729756	0.919746	1	542	tags=17%, list=3%, signal=17%
GOBP_G_PROTEIN_COUPLED_ACETYLCHOLINE_RECEPTOR_SIGNALING_PATHWAY	20	0.659929	1.69589	0.00568182	0.0477566	1	1346	tags=50%, list=7%, signal=54%
GOBP_G_PROTEIN_COUPLED_GLUTAMATE_RECEPTOR_SIGNALING_PATHWAY	14	0.688081	1.62622	0.0132325	0.0806911	1	1158	tags=43%, list=6%, signal=46%
GOBP_G_PROTEIN_COUPLED_OPIOID_RECEPTOR_SIGNALING_PATHWAY	8	0.648794	1.32437	0.149057	0.335114	1	3306	tags=50%, list=17%, signal=60%
GOBP_G_PROTEIN_COUPLED_RECEPTOR_INTERNALIZATION	17	0.438775	1.07489	0.362546	0.604748	1	913	tags=18%, list=5%, signal=19%
GOBP_G_PROTEIN_COUPLED_RECEPTOR_SIGNALING_PATHWAY_COUPLED_TO_CYCLIC_NUCLEOTIDE_SECOND_MESSENGER	29	0.556333	1.55202	0.0167286	0.128471	1	2983	tags=34%, list=15%, signal=41%
GOBP_G_PROTEIN_COUPLED_SEROTONIN_RECEPTOR_SIGNALING_PATHWAY	10	0.811126	1.73581	0.00376293	0.0359298	1	2648	tags=60%, list=14%, signal=69%
GOBP_G_QUADRUPLEX_DNA_UNWINDING	5	0.622029	1.12499	0.357422	0.546684	1	2252	tags=40%, list=12%, signal=45%
GOBP_G0_TO_G1_TRANSITION	36	0.469455	1.37251	0.0843965	0.286653	1	2894	tags=31%, list=15%, signal=36%
GOBP_G1_TO_G0_TRANSITION_INVOLVED_IN_CELL_DIFFERENTIATION	4	0.714337	1.22427	0.22758	0.435332	1	3664	tags=50%, list=19%, signal=62%
GOBP_GAMMA_AMINOBUTYRIC_ACID_IMPORT	5	0.449255	0.808219	0.716891	0.903587	1	2973	tags=40%, list=15%, signal=47%
GOBP_GAMMA_AMINOBUTYRIC_ACID_RECEPTOR_CLUSTERING	5	0.711289	1.28437	0.168605	0.375058	1	4267	tags=60%, list=22%, signal=77%
GOBP_GAMMA_AMINOBUTYRIC_ACID_SECRETION	19	0.47521	1.18112	0.25118	0.485829	1	5315	tags=58%, list=27%, signal=80%
GOBP_GAMMA_AMINOBUTYRIC_ACID_SIGNALING_PATHWAY	30	0.66353	1.82449	0.000933707	0.0155421	0.9745	1673	tags=43%, list=9%, signal=47%
GOBP_GAMMA_AMINOBUTYRIC_ACID_TRANSPORT	24	0.469719	1.25955	0.161751	0.398637	1	5315	tags=54%, list=27%, signal=75%
GOBP_GAMMA_DELTA_T_CELL_ACTIVATION	18	0.379782	0.938236	0.558516	0.771038	1	1635	tags=22%, list=8%, signal=24%
GOBP_GANGLION_DEVELOPMENT	13	0.509761	1.17641	0.28327	0.492222	1	2806	tags=31%, list=14%, signal=36%
GOBP_GANGLIOSIDE_BIOSYNTHETIC_PROCESS	16	0.467946	1.14629	0.28739	0.523486	1	4237	tags=38%, list=22%, signal=48%
GOBP_GANGLIOSIDE_BIOSYNTHETIC_PROCESS_VIA_LACTOSYLCERAMIDE	6	0.651352	1.23014	0.226971	0.429675	1	4237	tags=67%, list=22%, signal=85%
GOBP_GASTRIC_ACID_SECRETION	10	0.490747	1.06408	0.394118	0.61585	1	925	tags=20%, list=5%, signal=21%
GOBP_GASTRO_INTESTINAL_SYSTEM_SMOOTH_MUSCLE_CONTRACTION	10	0.519437	1.11453	0.345489	0.557917	1	2003	tags=20%, list=10%, signal=22%
GOBP_GASTRULATION_WITH_MOUTH_FORMING_SECOND	34	0.287123	0.829419	0.734142	0.885277	1	663	tags=9%, list=3%, signal=9%
GOBP_GENERAL_ADAPTATION_SYNDROME	5	0.756513	1.35778	0.115984	0.300635	1	2907	tags=60%, list=15%, signal=71%
GOBP_GEPHYRIN_CLUSTERING_INVOLVED_IN_POSTSYNAPTIC_DENSITY_ASSEMBLY	5	0.523183	0.942851	0.566572	0.766381	1	5939	tags=60%, list=31%, signal=86%
GOBP_GERM_CELL_DEVELOPMENT	304	0.239427	0.949881	0.597681	0.7579	1	3732	tags=24%, list=19%, signal=30%
GOBP_GERM_CELL_MIGRATION	8	0.497443	0.999274	0.492137	0.695716	1	391	tags=13%, list=2%, signal=13%
GOBP_GERM_LINE_STEM_CELL_DIVISION	5	0.71025	1.2831	0.168919	0.376669	1	1223	tags=40%, list=6%, signal=43%
GOBP_GERMINAL_CENTER_B_CELL_DIFFERENTIATION	5	0.77396	1.41458	0.0816523	0.248404	1	1399	tags=40%, list=7%, signal=43%
GOBP_GERMINAL_CENTER_FORMATION	16	0.289782	0.700697	0.883302	0.963692	1	3140	tags=19%, list=16%, signal=22%
GOBP_GLANDULAR_EPITHELIAL_CELL_DEVELOPMENT	31	0.446615	1.25291	0.172043	0.405605	1	306	tags=13%, list=2%, signal=13%
GOBP_GLANDULAR_EPITHELIAL_CELL_MATURATION	8	0.572938	1.16714	0.289973	0.5037	1	306	tags=25%, list=2%, signal=25%
GOBP_GLIAL_CELL_DERIVED_NEUROTROPHIC_FACTOR_RECEPTOR_SIGNALING_PATHWAY	3	0.886771	1.41363	0.0531401	0.249001	1	369	tags=33%, list=2%, signal=34%
GOBP_GLOMERULAR_BASEMENT_MEMBRANE_DEVELOPMENT	9	0.5864	1.23555	0.227273	0.424459	1	383	tags=22%, list=2%, signal=23%
GOBP_GLOMERULUS_MORPHOGENESIS	10	0.292107	0.640819	0.889642	0.979816	1	1834	tags=20%, list=9%, signal=22%
GOBP_GLOSSOPHARYNGEAL_NERVE_DEVELOPMENT	2	0.765981	1.10492	0.362823	0.570699	1	1785	tags=50%, list=9%, signal=55%
GOBP_GLUCOCORTICOID_SECRETION	14	0.320557	0.758987	0.783654	0.938022	1	4013	tags=36%, list=21%, signal=45%
GOBP_GLUCOSAMINE_METABOLIC_PROCESS	5	0.486873	0.879717	0.638049	0.836975	1	4417	tags=40%, list=23%, signal=52%
GOBP_GLUCOSE_CATABOLIC_PROCESS	25	0.52222	1.38821	0.0823422	0.270209	1	5028	tags=40%, list=26%, signal=54%
GOBP_GLUCOSE_CATABOLIC_PROCESS_TO_LACTATE	5	0.720232	1.31566	0.158984	0.3435	1	2822	tags=40%, list=15%, signal=47%
GOBP_GLUCOSE_IMPORT	72	0.31193	1.02007	0.420019	0.668802	1	2181	tags=21%, list=11%, signal=23%
GOBP_GLUTAMATE_RECEPTOR_SIGNALING_PATHWAY	49	0.563468	1.73335	0.0027933	0.0366986	1	1450	tags=35%, list=7%, signal=37%	synaptic transmission
GOBP_GLUTAMATE_SECRETION	33	0.352453	1.01682	0.438931	0.6728	1	1850	tags=24%, list=10%, signal=27%
GOBP_GLYCEROL_3_PHOSPHATE_METABOLIC_PROCESS	9	0.557561	1.1677	0.274379	0.502729	1	1866	tags=22%, list=10%, signal=25%
GOBP_GLYCEROL_METABOLIC_PROCESS	15	0.221549	0.530901	0.973535	0.994855	1	7007	tags=60%, list=36%, signal=94%
GOBP_GLYCEROPHOSPHOLIPID_BIOSYNTHETIC_PROCESS	160	0.239446	0.882663	0.751604	0.83425	1	3133	tags=19%, list=16%, signal=23%
GOBP_GLYCOLYTIC_PROCESS_THROUGH_FRUCTOSE_6_PHOSPHATE	26	0.264152	0.712376	0.896262	0.959277	1	5028	tags=31%, list=26%, signal=41%
GOBP_GLYCOLYTIC_PROCESS_THROUGH_GLUCOSE_6_PHOSPHATE	20	0.337973	0.85606	0.657254	0.861912	1	5028	tags=40%, list=26%, signal=54%
GOBP_GLYCOPROTEIN_BIOSYNTHETIC_PROCESS	261	0.306936	1.18936	0.0947653	0.47544	1	2789	tags=18%, list=14%, signal=21%
GOBP_GLYCOPROTEIN_METABOLIC_PROCESS	321	0.306011	1.22213	0.0467626	0.437887	1	3038	tags=19%, list=16%, signal=23%
GOBP_GLYCOSYL_COMPOUND_CATABOLIC_PROCESS	28	0.297234	0.813624	0.737828	0.899554	1	1418	tags=11%, list=7%, signal=12%
GOBP_GLYCOSYLATION	204	0.312975	1.19497	0.0936639	0.469271	1	2702	tags=18%, list=14%, signal=21%
GOBP_GLYCOSYLCERAMIDE_CATABOLIC_PROCESS	7	0.308907	0.611464	0.90631	0.985419	1	1418	tags=14%, list=7%, signal=15%
GOBP_GMP_CATABOLIC_PROCESS	8	0.543661	1.1184	0.344601	0.553359	1	14	tags=13%, list=0%, signal=13%
GOBP_GMP_METABOLIC_PROCESS	22	0.367992	0.951146	0.536405	0.755682	1	2504	tags=18%, list=13%, signal=21%
GOBP_GOLGI_LOCALIZATION	14	0.564145	1.31294	0.136406	0.346809	1	4609	tags=57%, list=24%, signal=75%
GOBP_GOLGI_ORGANIZATION	130	0.45473	1.65759	0	0.0641222	1	3529	tags=31%, list=18%, signal=37%
GOBP_GOLGI_REASSEMBLY	5	0.648937	1.16113	0.314398	0.508872	1	6809	tags=100%, list=35%, signal=154%
GOBP_GOLGI_RIBBON_FORMATION	10	0.421343	0.918039	0.57829	0.795791	1	1536	tags=20%, list=8%, signal=22%
GOBP_GOLGI_TO_ENDOSOME_TRANSPORT	13	0.297101	0.684004	0.867308	0.968365	1	6021	tags=69%, list=31%, signal=100%
GOBP_GOLGI_TO_LYSOSOME_TRANSPORT	11	0.422804	0.937351	0.543103	0.772651	1	2791	tags=55%, list=14%, signal=64%
GOBP_GOLGI_TO_VACUOLE_TRANSPORT	20	0.440115	1.11902	0.295562	0.552523	1	2791	tags=40%, list=14%, signal=47%
GOBP_GOLGI_VESICLE_BUDDING	8	0.367387	0.752097	0.765038	0.940259	1	696	tags=13%, list=4%, signal=13%
GOBP_GOLGI_VESICLE_FUSION_TO_TARGET_MEMBRANE	5	0.52871	0.959769	0.541707	0.744918	1	966	tags=20%, list=5%, signal=21%
GOBP_GOLGI_VESICLE_TRANSPORT	274	0.286636	1.12693	0.153915	0.543768	1	3399	tags=27%, list=18%, signal=33%
GOBP_GONADOTROPHIN_RELEASING_HORMONE_NEURONAL_MIGRATION_TO_THE_HYPOTHALAMUS	7	0.771451	1.51325	0.0326923	0.159219	1	3160	tags=57%, list=16%, signal=68%
GOBP_GRANULOCYTE_CHEMOTAXIS	89	0.306489	1.04715	0.360825	0.636618	1	2580	tags=20%, list=13%, signal=23%
GOBP_GRANULOCYTE_MACROPHAGE_COLONY_STIMULATING_FACTOR_PRODUCTION	11	0.341943	0.750362	0.777362	0.940923	1	288	tags=9%, list=1%, signal=9%
GOBP_GRANULOCYTE_MACROPHAGE_COLONY_STIMULATING_FACTOR_SIGNALING_PATHWAY	4	0.288575	0.489189	0.975024	0.997612	1	6599	tags=50%, list=34%, signal=76%
GOBP_GRANULOCYTE_MIGRATION	114	0.261433	0.919461	0.653916	0.795096	1	2580	tags=17%, list=13%, signal=19%
GOBP_GROOMING_BEHAVIOR	20	0.487342	1.2492	0.173913	0.40941	1	619	tags=20%, list=3%, signal=21%
GOBP_GROWTH_HORMONE_RECEPTOR_SIGNALING_PATHWAY_VIA_JAK_STAT	8	0.493007	1.01404	0.458333	0.676991	1	3819	tags=25%, list=20%, signal=31%
GOBP_GROWTH_HORMONE_SECRETION	17	0.582399	1.44047	0.0725157	0.221485	1	2523	tags=35%, list=13%, signal=41%
GOBP_GROWTH_PLATE_CARTILAGE_CHONDROCYTE_DIFFERENTIATION	10	0.290854	0.640214	0.90167	0.979908	1	2524	tags=20%, list=13%, signal=23%
GOBP_GROWTH_PLATE_CARTILAGE_CHONDROCYTE_PROLIFERATION	5	0.525432	0.961677	0.546226	0.742261	1	5631	tags=60%, list=29%, signal=85%
GOBP_GUANINE_CATABOLIC_PROCESS	4	0.819762	1.38855	0.0775047	0.269993	1	14	tags=25%, list=0%, signal=25%
GOBP_GUANINE_METABOLIC_PROCESS	8	0.530601	1.10015	0.364625	0.575915	1	14	tags=13%, list=0%, signal=13%
GOBP_HABITUATION	6	0.771763	1.45677	0.0573848	0.205953	1	2181	tags=50%, list=11%, signal=56%
GOBP_HAIR_CYCLE_PHASE	17	0.397337	0.966817	0.485767	0.737131	1	3	tags=6%, list=0%, signal=6%
GOBP_HAIR_FOLLICLE_CELL_PROLIFERATION	4	0.28713	0.494717	0.975161	0.99727	1	3067	tags=25%, list=16%, signal=30%
GOBP_HAIR_FOLLICLE_MATURATION	23	0.363262	0.960234	0.513711	0.744383	1	3	tags=4%, list=0%, signal=4%
GOBP_HAIR_FOLLICLE_PLACODE_FORMATION	5	0.42795	0.771292	0.764878	0.931567	1	542	tags=20%, list=3%, signal=21%
GOBP_HARD_PALATE_DEVELOPMENT	8	0.541677	1.10634	0.35545	0.568538	1	1704	tags=25%, list=9%, signal=27%
GOBP_HEART_FIELD_SPECIFICATION	13	0.624231	1.44454	0.0682028	0.216639	1	1834	tags=31%, list=9%, signal=34%
GOBP_HEART_FORMATION	27	0.313873	0.852165	0.7	0.864298	1	1834	tags=19%, list=9%, signal=20%
GOBP_HEART_GROWTH	105	0.300947	1.04942	0.353207	0.633793	1	3137	tags=24%, list=16%, signal=28%
GOBP_HEART_MORPHOGENESIS	252	0.249522	0.974636	0.528992	0.725042	1	2149	tags=17%, list=11%, signal=19%
GOBP_HEART_PROCESS	224	0.312556	1.2088	0.0678439	0.454151	1	3193	tags=29%, list=16%, signal=35%
GOBP_HEART_VALVE_DEVELOPMENT	59	0.337091	1.06922	0.337017	0.610184	1	1834	tags=17%, list=9%, signal=19%
GOBP_HEART_VALVE_MORPHOGENESIS	49	0.251605	0.76796	0.855166	0.932464	1	1834	tags=12%, list=9%, signal=13%
GOBP_HEMATOPOIETIC_OR_LYMPHOID_ORGAN_DEVELOPMENT	97	0.243262	0.833553	0.825603	0.881401	1	3977	tags=22%, list=21%, signal=27%
GOBP_HEMATOPOIETIC_STEM_CELL_DIFFERENTIATION	30	0.317147	0.886097	0.634169	0.8313	1	1887	tags=20%, list=10%, signal=22%
GOBP_HEMATOPOIETIC_STEM_CELL_PROLIFERATION	33	0.271736	0.774217	0.813607	0.92947	1	1947	tags=15%, list=10%, signal=17%
GOBP_HEPARAN_SULFATE_PROTEOGLYCAN_BIOSYNTHETIC_PROCESS	29	0.63555	1.7476	0.00190295	0.0322828	1	2729	tags=34%, list=14%, signal=40%
GOBP_HEPARAN_SULFATE_PROTEOGLYCAN_BIOSYNTHETIC_PROCESS_ENZYMATIC_MODIFICATION	5	0.865891	1.53652	0.0143541	0.141085	1	152	tags=40%, list=1%, signal=40%
GOBP_HEPARAN_SULFATE_PROTEOGLYCAN_BIOSYNTHETIC_PROCESS_POLYSACCHARIDE_CHAIN_BIOSYNTHETIC_PROCESS	7	0.787647	1.53466	0.0335893	0.142675	1	2729	tags=57%, list=14%, signal=66%
GOBP_HEPARAN_SULFATE_PROTEOGLYCAN_METABOLIC_PROCESS	9	0.74169	1.58242	0.0227948	0.107091	1	369	tags=33%, list=2%, signal=34%
GOBP_HEPARIN_BIOSYNTHETIC_PROCESS	6	0.82256	1.56107	0.0146628	0.121842	1	1896	tags=50%, list=10%, signal=55%
GOBP_HEPATICOBILIARY_SYSTEM_DEVELOPMENT	124	0.249884	0.892749	0.725564	0.823541	1	2470	tags=17%, list=13%, signal=19%
GOBP_HEPATOCYTE_APOPTOTIC_PROCESS	24	0.35443	0.924356	0.573679	0.790198	1	2356	tags=25%, list=12%, signal=28%
GOBP_HEPATOCYTE_DIFFERENTIATION	10	0.463877	0.995669	0.489914	0.699938	1	162	tags=10%, list=1%, signal=10%
GOBP_HETEROCHROMATIN_ORGANIZATION	91	0.246049	0.839696	0.804408	0.875117	1	4926	tags=29%, list=25%, signal=38%
GOBP_HETEROPHILIC_CELL_CELL_ADHESION_VIA_PLASMA_MEMBRANE_CELL_ADHESION_MOLECULES	45	0.338099	1.02447	0.408372	0.662689	1	3594	tags=31%, list=19%, signal=38%
GOBP_HEXOSE_CATABOLIC_PROCESS	37	0.262248	0.767983	0.832864	0.932573	1	2822	tags=22%, list=15%, signal=25%
GOBP_HINDBRAIN_DEVELOPMENT	160	0.296103	1.10069	0.237478	0.575322	1	2110	tags=19%, list=11%, signal=22%
GOBP_HINDBRAIN_MATURATION	7	0.365808	0.721518	0.821565	0.955581	1	3734	tags=43%, list=19%, signal=53%
GOBP_HINDLIMB_MORPHOGENESIS	39	0.432164	1.25897	0.1527	0.399428	1	2374	tags=28%, list=12%, signal=32%
GOBP_HIPPOCAMPAL_NEURON_APOPTOTIC_PROCESS	8	0.440886	0.900815	0.608451	0.814217	1	2323	tags=38%, list=12%, signal=43%
GOBP_HIPPOCAMPUS_DEVELOPMENT	78	0.463194	1.5541	0.00756144	0.126392	1	3002	tags=35%, list=15%, signal=41%
GOBP_HISTAMINE_TRANSPORT	17	0.382832	0.926945	0.544413	0.787407	1	1697	tags=18%, list=9%, signal=19%
GOBP_HISTONE_H2A_ACETYLATION	5	0.566803	1.027	0.478095	0.659327	1	3791	tags=40%, list=20%, signal=50%
GOBP_HISTONE_H2A_UBIQUITINATION	5	0.674044	1.22607	0.250239	0.434065	1	2421	tags=40%, list=12%, signal=46%
GOBP_HISTONE_H3_K4_METHYLATION	21	0.387599	1.00436	0.446955	0.690434	1	7113	tags=48%, list=37%, signal=75%
GOBP_HISTONE_H3_K9_METHYLATION	6	0.739843	1.40111	0.0878243	0.258129	1	4761	tags=83%, list=25%, signal=110%
GOBP_HISTONE_H3_K9_MODIFICATION	8	0.578414	1.17748	0.286385	0.490828	1	3019	tags=50%, list=16%, signal=59%
GOBP_HISTONE_H4_ACETYLATION	14	0.567267	1.34466	0.129503	0.314509	1	3791	tags=36%, list=20%, signal=44%
GOBP_HISTONE_H4_K16_ACETYLATION	8	0.691605	1.40718	0.0972872	0.253644	1	3791	tags=38%, list=20%, signal=47%
GOBP_HISTONE_METHYLATION	51	0.352018	1.08698	0.318099	0.590941	1	4815	tags=35%, list=25%, signal=47%
GOBP_HISTONE_MODIFICATION	159	0.325107	1.19002	0.119048	0.475627	1	4862	tags=36%, list=25%, signal=47%
GOBP_HISTONE_MONOUBIQUITINATION	8	0.594638	1.21033	0.260234	0.452304	1	6794	tags=75%, list=35%, signal=115%
GOBP_HISTONE_MRNA_CATABOLIC_PROCESS	11	0.45609	0.993904	0.481482	0.70231	1	5952	tags=36%, list=31%, signal=52%
GOBP_HISTONE_MRNA_METABOLIC_PROCESS	20	0.564083	1.42521	0.0839695	0.237031	1	2516	tags=25%, list=13%, signal=29%
GOBP_HISTONE_UBIQUITINATION	11	0.607583	1.33396	0.156648	0.325493	1	6794	tags=82%, list=35%, signal=126%
GOBP_HOMOLOGOUS_CHROMOSOME_PAIRING_AT_MEIOSIS	39	0.288083	0.851643	0.682364	0.864862	1	3198	tags=26%, list=16%, signal=31%
GOBP_HOMOLOGOUS_CHROMOSOME_SEGREGATION	52	0.335416	1.03866	0.372567	0.645438	1	3198	tags=27%, list=16%, signal=32%
GOBP_HOMOLOGOUS_RECOMBINATION	51	0.176812	0.539007	0.998168	0.994125	1	5384	tags=25%, list=28%, signal=35%
GOBP_HOMOPHILIC_CELL_ADHESION_VIA_PLASMA_MEMBRANE_ADHESION_MOLECULES	99	0.505607	1.75264	0	0.0308341	1	2543	tags=32%, list=13%, signal=37%
GOBP_HORMONE_BIOSYNTHETIC_PROCESS	45	0.294497	0.877713	0.668778	0.839401	1	3746	tags=29%, list=19%, signal=36%
GOBP_HORMONE_MEDIATED_SIGNALING_PATHWAY	146	0.384255	1.41195	0.0120482	0.250229	1	4084	tags=36%, list=21%, signal=45%
GOBP_HORMONE_TRANSPORT	338	0.366978	1.46782	0	0.197491	1	2592	tags=23%, list=13%, signal=26%
GOBP_HYDROGEN_PEROXIDE_BIOSYNTHETIC_PROCESS	13	0.493028	1.13716	0.319367	0.533395	1	4817	tags=46%, list=25%, signal=61%
GOBP_HYDROGEN_PEROXIDE_METABOLIC_PROCESS	40	0.229882	0.677741	0.935885	0.970578	1	4063	tags=23%, list=21%, signal=28%
GOBP_HYPOTHALAMUS_CELL_DIFFERENTIATION	12	0.65956	1.47418	0.0596459	0.192163	1	3160	tags=42%, list=16%, signal=50%
GOBP_HYPOTHALAMUS_CELL_MIGRATION	8	0.462284	0.932054	0.558248	0.780386	1	3160	tags=50%, list=16%, signal=60%
GOBP_HYPOTHALAMUS_DEVELOPMENT	20	0.420839	1.08553	0.347498	0.592568	1	1447	tags=25%, list=7%, signal=27%
GOBP_HYPOTHALAMUS_GONADOTROPHIN_RELEASING_HORMONE_NEURON_DIFFERENTIATION	9	0.66711	1.43421	0.0814394	0.227959	1	3160	tags=44%, list=16%, signal=53%
GOBP_HYPOXANTHINE_METABOLIC_PROCESS	6	0.75959	1.44465	0.0460526	0.217113	1	2504	tags=50%, list=13%, signal=57%
GOBP_HYPOXIA_INDUCIBLE_FACTOR_1ALPHA_SIGNALING_PATHWAY	7	0.588765	1.16149	0.306679	0.508893	1	4923	tags=57%, list=25%, signal=77%
GOBP_I_KAPPAB_PHOSPHORYLATION	17	0.519037	1.28618	0.167464	0.374213	1	2117	tags=24%, list=11%, signal=26%
GOBP_ICOSANOID_SECRETION	39	0.429234	1.24299	0.15613	0.415832	1	3607	tags=28%, list=19%, signal=35%
GOBP_ICOSANOID_TRANSPORT	48	0.33246	1.01716	0.413923	0.672697	1	3607	tags=23%, list=19%, signal=28%
GOBP_IMMATURE_B_CELL_DIFFERENTIATION	13	0.31156	0.721656	0.827653	0.955585	1	3938	tags=23%, list=20%, signal=29%
GOBP_IMMUNE_RESPONSE_INHIBITING_CELL_SURFACE_RECEPTOR_SIGNALING_PATHWAY	2	0.559396	0.809494	0.777561	0.902964	1	8543	tags=100%, list=44%, signal=179%
GOBP_IMMUNE_RESPONSE_INHIBITING_SIGNAL_TRANSDUCTION	3	0.608165	0.960974	0.575188	0.743211	1	6100	tags=67%, list=31%, signal=97%
GOBP_IMMUNE_RESPONSE_REGULATING_SIGNALING_PATHWAY	344	0.21859	0.874694	0.864888	0.843067	1	4385	tags=25%, list=23%, signal=32%
GOBP_IMMUNE_SYSTEM_DEVELOPMENT	195	0.226989	0.8584	0.839926	0.85993	1	3977	tags=24%, list=21%, signal=29%
GOBP_IMMUNOGLOBULIN_V_D_J_RECOMBINATION	10	0.290297	0.635467	0.884273	0.981095	1	6163	tags=50%, list=32%, signal=73%
GOBP_IMMUNOLOGICAL_MEMORY_FORMATION_PROCESS	6	0.399918	0.750658	0.778426	0.941261	1	2784	tags=33%, list=14%, signal=39%
GOBP_IMPORT_INTO_NUCLEUS	169	0.301306	1.12009	0.204545	0.551413	1	3970	tags=30%, list=20%, signal=37%
GOBP_INDUCTION_OF_POSITIVE_CHEMOTAXIS	14	0.439319	1.0206	0.44052	0.667821	1	3067	tags=50%, list=16%, signal=59%
GOBP_INHIBITORY_CHEMICAL_SYNAPTIC_TRANSMISSION	7	0.550451	1.07329	0.408478	0.606412	1	1707	tags=43%, list=9%, signal=47%
GOBP_INHIBITORY_POSTSYNAPTIC_POTENTIAL	25	0.651608	1.75117	0.00295567	0.0310989	1	4069	tags=52%, list=21%, signal=66%
GOBP_INHIBITORY_SYNAPSE_ASSEMBLY	20	0.474617	1.20486	0.229523	0.457165	1	493	tags=15%, list=3%, signal=15%
GOBP_INNATE_IMMUNE_RESPONSE_ACTIVATING_CELL_SURFACE_RECEPTOR_SIGNALING_PATHWAY	60	0.249735	0.798366	0.830882	0.912252	1	1164	tags=8%, list=6%, signal=9%
GOBP_INNATE_IMMUNE_RESPONSE_ACTIVATING_SIGNALING_PATHWAY	200	0.231778	0.878247	0.791478	0.838721	1	4357	tags=25%, list=22%, signal=32%
GOBP_INNER_CELL_MASS_CELL_PROLIFERATION	16	0.354543	0.854804	0.679119	0.862495	1	4761	tags=44%, list=25%, signal=58%
GOBP_INNER_DYNEIN_ARM_ASSEMBLY	16	0.555596	1.34571	0.132223	0.313807	1	4398	tags=38%, list=23%, signal=48%
GOBP_INNER_EAR_RECEPTOR_CELL_DEVELOPMENT	57	0.350284	1.10481	0.290083	0.570679	1	2214	tags=21%, list=11%, signal=24%
GOBP_INNERVATION	31	0.557566	1.5519	0.0287908	0.128512	1	1577	tags=29%, list=8%, signal=32%
GOBP_INORGANIC_ANION_TRANSMEMBRANE_TRANSPORT	75	0.405176	1.35077	0.0517737	0.30806	1	3231	tags=28%, list=17%, signal=33%
GOBP_INORGANIC_ION_HOMEOSTASIS	463	0.277596	1.14874	0.090009	0.522051	1	2043	tags=17%, list=11%, signal=18%
GOBP_INORGANIC_ION_IMPORT_ACROSS_PLASMA_MEMBRANE	102	0.328677	1.13708	0.216216	0.533162	1	1816	tags=21%, list=9%, signal=23%
GOBP_INOSITOL_METABOLIC_PROCESS	9	0.73234	1.54426	0.0355086	0.135031	1	2668	tags=44%, list=14%, signal=52%
GOBP_INOSITOL_PHOSPHATE_BIOSYNTHETIC_PROCESS	28	0.478471	1.34058	0.0959276	0.319232	1	3205	tags=32%, list=17%, signal=38%
GOBP_INOSITOL_PHOSPHATE_METABOLIC_PROCESS	39	0.448987	1.31514	0.104283	0.344282	1	3205	tags=31%, list=17%, signal=37%
GOBP_INOSITOL_TRISPHOSPHATE_BIOSYNTHETIC_PROCESS	11	0.549613	1.21422	0.240196	0.44739	1	1342	tags=18%, list=7%, signal=20%
GOBP_INOSITOL_TRISPHOSPHATE_METABOLIC_PROCESS	17	0.566805	1.39677	0.0974874	0.262513	1	1342	tags=18%, list=7%, signal=19%
GOBP_INSEMINATION	9	0.497757	1.04321	0.435514	0.640438	1	277	tags=11%, list=1%, signal=11%
GOBP_INSULIN_LIKE_GROWTH_FACTOR_RECEPTOR_SIGNALING_PATHWAY	45	0.413852	1.25368	0.140036	0.405165	1	480	tags=11%, list=2%, signal=11%
GOBP_INSULIN_METABOLIC_PROCESS	18	0.423581	1.06262	0.391675	0.61788	1	1332	tags=17%, list=7%, signal=18%
GOBP_INSULIN_PROCESSING	8	0.736654	1.49823	0.0506329	0.17182	1	417	tags=25%, list=2%, signal=26%
GOBP_INSULIN_RECEPTOR_SIGNALING_PATHWAY	122	0.379693	1.35552	0.0327571	0.303225	1	3704	tags=32%, list=19%, signal=39%
GOBP_INSULIN_SECRETION	222	0.408202	1.57609	0	0.110317	1	2276	tags=24%, list=12%, signal=27%
GOBP_INSULIN_SECRETION_INVOLVED_IN_CELLULAR_RESPONSE_TO_GLUCOSE_STIMULUS	85	0.408969	1.38516	0.0363467	0.274826	1	2131	tags=22%, list=11%, signal=25%
GOBP_INTERFERON_ALPHA_PRODUCTION	31	0.305117	0.849422	0.68609	0.86708	1	2657	tags=29%, list=14%, signal=34%
GOBP_INTERFERON_BETA_PRODUCTION	63	0.269232	0.865653	0.702857	0.852752	1	2930	tags=22%, list=15%, signal=26%
GOBP_INTERFERON_MEDIATED_SIGNALING_PATHWAY	69	0.262079	0.860933	0.735795	0.857936	1	2961	tags=16%, list=15%, signal=19%
GOBP_INTERKINETIC_NUCLEAR_MIGRATION	10	0.701921	1.52301	0.0416263	0.152029	1	2600	tags=40%, list=13%, signal=46%
GOBP_INTERLEUKIN_1_ALPHA_PRODUCTION	11	0.421289	0.924192	0.564728	0.79043	1	1450	tags=18%, list=7%, signal=20%
GOBP_INTERLEUKIN_11_MEDIATED_SIGNALING_PATHWAY	5	0.471031	0.848378	0.673184	0.868042	1	796	tags=20%, list=4%, signal=21%
GOBP_INTERLEUKIN_12_MEDIATED_SIGNALING_PATHWAY	7	0.542686	1.05625	0.426966	0.625016	1	242	tags=14%, list=1%, signal=14%
GOBP_INTERLEUKIN_12_PRODUCTION	49	0.193013	0.593924	0.988414	0.98682	1	2042	tags=8%, list=11%, signal=9%
GOBP_INTERLEUKIN_18_PRODUCTION	10	0.400456	0.860275	0.653992	0.858816	1	6240	tags=40%, list=32%, signal=59%
GOBP_INTERLEUKIN_27_MEDIATED_SIGNALING_PATHWAY	5	0.648379	1.17289	0.311024	0.496527	1	5640	tags=60%, list=29%, signal=85%
GOBP_INTERLEUKIN_4_MEDIATED_SIGNALING_PATHWAY	7	0.561646	1.11551	0.345091	0.55689	1	4251	tags=29%, list=22%, signal=37%
GOBP_INTERLEUKIN_5_MEDIATED_SIGNALING_PATHWAY	5	0.470549	0.858643	0.668312	0.859742	1	6599	tags=60%, list=34%, signal=91%
GOBP_INTERNAL_PROTEIN_AMINO_ACID_ACETYLATION	69	0.3593	1.17491	0.180465	0.494496	1	3791	tags=32%, list=20%, signal=39%
GOBP_INTERPHASE	2	0.660868	0.964643	0.555235	0.739718	1	6504	tags=50%, list=34%, signal=75%
GOBP_INTERSTRAND_CROSS_LINK_REPAIR	32	0.22632	0.636621	0.959522	0.981105	1	5464	tags=31%, list=28%, signal=43%
GOBP_INTESTINAL_EPITHELIAL_CELL_DEVELOPMENT	12	0.518715	1.16571	0.296903	0.504715	1	2911	tags=25%, list=15%, signal=29%
GOBP_INTESTINAL_EPITHELIAL_CELL_DIFFERENTIATION	15	0.39619	0.949362	0.515748	0.757991	1	2911	tags=27%, list=15%, signal=31%
GOBP_INTESTINE_SMOOTH_MUSCLE_CONTRACTION	6	0.299533	0.557561	0.941286	0.991156	1	2003	tags=17%, list=10%, signal=19%
GOBP_INTRA_GOLGI_VESICLE_MEDIATED_TRANSPORT	29	0.566662	1.55509	0.0189934	0.125975	1	4732	tags=52%, list=24%, signal=68%
GOBP_INTRACELLULAR_AMINO_ACID_HOMEOSTASIS	9	0.417345	0.886797	0.616822	0.830663	1	2097	tags=22%, list=11%, signal=25%
GOBP_INTRACELLULAR_DISTRIBUTION_OF_MITOCHONDRIA	11	0.496209	1.11089	0.331461	0.562848	1	4417	tags=64%, list=23%, signal=82%
GOBP_INTRACELLULAR_GLUCOSE_HOMEOSTASIS	146	0.311754	1.13944	0.177799	0.530385	1	2977	tags=22%, list=15%, signal=26%
GOBP_INTRACELLULAR_GLUTAMATE_HOMEOSTASIS	5	0.522723	0.940337	0.586936	0.769107	1	4168	tags=60%, list=21%, signal=76%
GOBP_INTRACELLULAR_MAGNESIUM_ION_HOMEOSTASIS	4	0.530947	0.910153	0.617308	0.804799	1	1908	tags=25%, list=10%, signal=28%
GOBP_INTRACELLULAR_OXYGEN_HOMEOSTASIS	7	0.316389	0.61639	0.911463	0.98524	1	3829	tags=43%, list=20%, signal=53%
GOBP_INTRACELLULAR_RECEPTOR_SIGNALING_PATHWAY	288	0.266986	1.05214	0.313177	0.630133	1	4398	tags=31%, list=23%, signal=39%
GOBP_INTRACELLULAR_TRANSPORT_OF_VIRUS	4	0.463369	0.785763	0.742278	0.922128	1	4723	tags=75%, list=24%, signal=99%
GOBP_INTRACELLULAR_ZINC_ION_HOMEOSTASIS	25	0.476455	1.27996	0.140115	0.379649	1	1391	tags=16%, list=7%, signal=17%
GOBP_INTRACILIARY_ANTEROGRADE_TRANSPORT	19	0.510985	1.27919	0.171963	0.380448	1	2524	tags=32%, list=13%, signal=36%
GOBP_INTRACILIARY_RETROGRADE_TRANSPORT	15	0.505047	1.1895	0.255419	0.475679	1	6471	tags=80%, list=33%, signal=120%
GOBP_INTRACILIARY_TRANSPORT	50	0.533753	1.65564	0.00641026	0.0649101	1	2524	tags=36%, list=13%, signal=41%
GOBP_INTRACILIARY_TRANSPORT_INVOLVED_IN_CILIUM_ASSEMBLY	7	0.528693	1.05547	0.425781	0.626006	1	2054	tags=43%, list=11%, signal=48%
GOBP_INTRINSIC_APOPTOTIC_SIGNALING_PATHWAY_IN_RESPONSE_TO_ENDOPLASMIC_RETICULUM_STRESS	62	0.229067	0.734748	0.914714	0.950276	1	1593	tags=13%, list=8%, signal=14%
GOBP_INTRINSIC_APOPTOTIC_SIGNALING_PATHWAY_IN_RESPONSE_TO_HYPOXIA	13	0.43682	1.01478	0.437132	0.675784	1	2466	tags=23%, list=13%, signal=26%
GOBP_INTRINSIC_APOPTOTIC_SIGNALING_PATHWAY_IN_RESPONSE_TO_OSMOTIC_STRESS	8	0.617415	1.27516	0.197143	0.384594	1	675	tags=38%, list=3%, signal=39%
GOBP_IODIDE_TRANSPORT	7	0.377733	0.751796	0.78687	0.940467	1	6307	tags=57%, list=33%, signal=85%
GOBP_ION_CHANNEL_MODULATING_G_PROTEIN_COUPLED_RECEPTOR_SIGNALING_PATHWAY	11	0.750107	1.63146	0.0126468	0.0781017	1	1346	tags=55%, list=7%, signal=59%
GOBP_IONOTROPIC_GLUTAMATE_RECEPTOR_SIGNALING_PATHWAY	19	0.441728	1.12802	0.30117	0.542928	1	1434	tags=26%, list=7%, signal=28%
GOBP_IRE1_MEDIATED_UNFOLDED_PROTEIN_RESPONSE	14	0.32392	0.775775	0.760267	0.928373	1	5487	tags=43%, list=28%, signal=60%
GOBP_IRIS_MORPHOGENESIS	5	0.61563	1.1148	0.369915	0.557848	1	6270	tags=80%, list=32%, signal=118%
GOBP_ISOLEUCINE_CATABOLIC_PROCESS	5	0.444982	0.794461	0.738007	0.915265	1	6967	tags=60%, list=36%, signal=94%
GOBP_ISOPRENOID_CATABOLIC_PROCESS	8	0.349603	0.702873	0.840675	0.962443	1	1961	tags=25%, list=10%, signal=28%
GOBP_ISOPRENOID_TRANSPORT	5	0.633422	1.13975	0.342964	0.530642	1	1910	tags=40%, list=10%, signal=44%
GOBP_ISOTYPE_SWITCHING_TO_IGA_ISOTYPES	8	0.336425	0.68268	0.85901	0.96888	1	4351	tags=38%, list=22%, signal=48%
GOBP_ISOTYPE_SWITCHING_TO_IGG_ISOTYPES	13	0.402558	0.930265	0.537342	0.783202	1	5651	tags=38%, list=29%, signal=54%
GOBP_JNK_CASCADE	161	0.413514	1.53139	0.00186916	0.145968	1	2146	tags=21%, list=11%, signal=24%
GOBP_KERATINIZATION	18	0.278647	0.689746	0.883019	0.966979	1	5209	tags=28%, list=27%, signal=38%
GOBP_KERATINOCYTE_DEVELOPMENT	13	0.422624	0.982222	0.490269	0.715051	1	5529	tags=46%, list=29%, signal=65%
GOBP_KERATINOCYTE_DIFFERENTIATION	95	0.342549	1.19119	0.15566	0.473838	1	1415	tags=11%, list=7%, signal=11%
GOBP_KERATINOCYTE_MIGRATION	18	0.393498	0.990292	0.471082	0.706089	1	3877	tags=33%, list=20%, signal=42%
GOBP_KERATINOCYTE_PROLIFERATION	49	0.3788	1.16647	0.205882	0.504256	1	2524	tags=27%, list=13%, signal=30%
GOBP_KIDNEY_MESENCHYME_DEVELOPMENT	9	0.342819	0.731052	0.793605	0.950801	1	3453	tags=44%, list=18%, signal=54%
GOBP_KINETOCHORE_ASSEMBLY	16	0.477163	1.16671	0.268501	0.504398	1	4086	tags=31%, list=21%, signal=40%
GOBP_KINETOCHORE_ORGANIZATION	20	0.410043	1.04353	0.395415	0.640214	1	4086	tags=30%, list=21%, signal=38%
GOBP_L_ALANINE_TRANSMEMBRANE_TRANSPORT	5	0.510772	0.921627	0.594568	0.793296	1	4435	tags=60%, list=23%, signal=78%
GOBP_L_ALANINE_TRANSPORT	9	0.435493	0.921166	0.56367	0.793496	1	4435	tags=44%, list=23%, signal=58%
GOBP_L_ASPARTATE_IMPORT_ACROSS_PLASMA_MEMBRANE	6	0.474248	0.897021	0.602713	0.818627	1	604	tags=17%, list=3%, signal=17%
GOBP_L_CYSTINE_TRANSPORT	3	0.68419	1.08938	0.404926	0.587462	1	5596	tags=67%, list=29%, signal=94%
GOBP_LABYRINTHINE_LAYER_BLOOD_VESSEL_DEVELOPMENT	23	0.439078	1.15391	0.264081	0.51549	1	1016	tags=17%, list=5%, signal=18%
GOBP_LABYRINTHINE_LAYER_DEVELOPMENT	51	0.303121	0.934876	0.563394	0.77672	1	1833	tags=18%, list=9%, signal=19%
GOBP_LACTATE_BIOSYNTHETIC_PROCESS	5	0.57499	1.03137	0.462209	0.654477	1	1654	tags=40%, list=9%, signal=44%
GOBP_LATE_ENDOSOME_TO_GOLGI_TRANSPORT	5	0.491145	0.885751	0.629032	0.831458	1	2295	tags=40%, list=12%, signal=45%
GOBP_LATE_ENDOSOME_TO_LYSOSOME_TRANSPORT	19	0.379393	0.943469	0.545536	0.765631	1	3247	tags=26%, list=17%, signal=32%
GOBP_LATE_NUCLEOPHAGY	8	0.45205	0.921812	0.550682	0.793153	1	5204	tags=50%, list=27%, signal=68%
GOBP_LAYER_FORMATION_IN_CEREBRAL_CORTEX	16	0.505438	1.22701	0.224186	0.433133	1	2604	tags=25%, list=13%, signal=29%
GOBP_LEARNED_VOCALIZATION_BEHAVIOR_OR_VOCAL_LEARNING	10	0.624478	1.37101	0.107075	0.287748	1	6031	tags=70%, list=31%, signal=102%
GOBP_LEARNING	181	0.4876	1.82844	0	0.014664	0.9675	2784	tags=29%, list=14%, signal=34%	associative learning
GOBP_LEFT_RIGHT_AXIS_SPECIFICATION	11	0.447156	1.0011	0.469925	0.693889	1	3930	tags=36%, list=20%, signal=46%
GOBP_LEFT_VENTRICULAR_CARDIAC_MUSCLE_TISSUE_MORPHOGENESIS	4	0.459898	0.778974	0.738072	0.926683	1	6541	tags=75%, list=34%, signal=113%
GOBP_LEPTIN_MEDIATED_SIGNALING_PATHWAY	10	0.420656	0.917201	0.583333	0.79669	1	4544	tags=30%, list=23%, signal=39%
GOBP_LEUCINE_IMPORT_ACROSS_PLASMA_MEMBRANE	5	0.488833	0.900181	0.615236	0.815178	1	1241	tags=20%, list=6%, signal=21%
GOBP_LEUKOCYTE_ADHESION_TO_VASCULAR_ENDOTHELIAL_CELL	42	0.249369	0.746593	0.880072	0.944054	1	2248	tags=12%, list=12%, signal=13%
GOBP_LEUKOCYTE_MIGRATION_INVOLVED_IN_INFLAMMATORY_RESPONSE	15	0.303164	0.723364	0.839702	0.954377	1	2438	tags=20%, list=13%, signal=23%
GOBP_LEUKOCYTE_TETHERING_OR_ROLLING	27	0.317022	0.860606	0.658915	0.858441	1	1522	tags=11%, list=8%, signal=12%
GOBP_LIGAND_GATED_ION_CHANNEL_SIGNALING_PATHWAY	29	0.539951	1.49385	0.0333007	0.17554	1	1434	tags=38%, list=7%, signal=41%
GOBP_LIMB_JOINT_MORPHOGENESIS	4	0.924772	1.58743	0.00594059	0.104604	1	692	tags=50%, list=4%, signal=52%
GOBP_LIMBIC_SYSTEM_DEVELOPMENT	104	0.394206	1.37445	0.0347418	0.285524	1	3181	tags=34%, list=16%, signal=40%
GOBP_LIPID_EXPORT_FROM_CELL	52	0.276395	0.858996	0.725024	0.85949	1	4013	tags=27%, list=21%, signal=34%
GOBP_LIPID_GLYCOSYLATION	10	0.423345	0.924799	0.552309	0.789619	1	5233	tags=60%, list=27%, signal=82%
GOBP_LIPID_IMPORT_INTO_CELL	24	0.517161	1.36436	0.0981713	0.294744	1	2042	tags=21%, list=11%, signal=23%
GOBP_LIPID_PHOSPHORYLATION	11	0.719614	1.58451	0.0213953	0.105864	1	2072	tags=55%, list=11%, signal=61%
GOBP_LIPOPOLYSACCHARIDE_MEDIATED_SIGNALING_PATHWAY	51	0.289199	0.883712	0.676608	0.833611	1	4484	tags=25%, list=23%, signal=33%
GOBP_LOBAR_BRONCHUS_DEVELOPMENT	4	0.5773	1.00013	0.495567	0.694791	1	3938	tags=50%, list=20%, signal=63%
GOBP_LOCOMOTION_INVOLVED_IN_LOCOMOTORY_BEHAVIOR	15	0.40249	0.965698	0.504699	0.738495	1	2240	tags=47%, list=12%, signal=53%
GOBP_LOCOMOTOR_RHYTHM	20	0.695767	1.78915	0.00284091	0.0218324	0.998	4104	tags=60%, list=21%, signal=76%
GOBP_LOCOMOTORY_BEHAVIOR	246	0.327441	1.27679	0.0298229	0.382841	1	2299	tags=24%, list=12%, signal=27%
GOBP_LOCOMOTORY_EXPLORATION_BEHAVIOR	21	0.41885	1.07135	0.378403	0.608773	1	1588	tags=29%, list=8%, signal=31%
GOBP_LONG_CHAIN_FATTY_ACID_IMPORT_ACROSS_PLASMA_MEMBRANE	12	0.370892	0.831933	0.690544	0.882852	1	2042	tags=17%, list=11%, signal=19%
GOBP_LONG_CHAIN_FATTY_ACID_IMPORT_INTO_CELL	19	0.302634	0.755617	0.793709	0.938266	1	2042	tags=16%, list=11%, signal=18%
GOBP_LONG_CHAIN_FATTY_ACID_TRANSPORT	54	0.254231	0.798081	0.833333	0.912412	1	2178	tags=15%, list=11%, signal=17%
GOBP_LONG_CHAIN_FATTY_ACYL_COA_METABOLIC_PROCESS	10	0.56386	1.22448	0.244087	0.435163	1	1296	tags=40%, list=7%, signal=43%
GOBP_LONG_TERM_MEMORY	42	0.55908	1.65699	0.00275229	0.0642814	1	2439	tags=38%, list=13%, signal=43%	associative learning
GOBP_LONG_TERM_SYNAPTIC_DEPRESSION	39	0.648495	1.92328	0	0.00434199	0.411	2738	tags=41%, list=14%, signal=48%	synaptic plasticity
GOBP_LONG_TERM_SYNAPTIC_POTENTIATION	118	0.445372	1.57376	0.00368324	0.112697	1	3505	tags=36%, list=18%, signal=44%	synaptic plasticity
GOBP_LUNG_CELL_DIFFERENTIATION	33	0.396873	1.11598	0.301318	0.555937	1	680	tags=9%, list=4%, signal=9%
GOBP_LUNG_EPITHELIUM_DEVELOPMENT	51	0.432291	1.32899	0.0876384	0.330123	1	800	tags=14%, list=4%, signal=14%
GOBP_LUNG_GOBLET_CELL_DIFFERENTIATION	2	0.418824	0.61298	0.923454	0.985354	1	3938	tags=50%, list=20%, signal=63%
GOBP_LUNG_GROWTH	7	0.450389	0.880817	0.647738	0.836394	1	3652	tags=43%, list=19%, signal=53%
GOBP_LUNG_SACCULE_DEVELOPMENT	12	0.469154	1.06814	0.379925	0.611475	1	3067	tags=42%, list=16%, signal=49%
GOBP_LUNG_SECRETORY_CELL_DIFFERENTIATION	10	0.291606	0.626426	0.908752	0.983403	1	3938	tags=30%, list=20%, signal=38%
GOBP_LUTEINIZATION	14	0.496013	1.17241	0.27907	0.497058	1	5428	tags=50%, list=28%, signal=69%
GOBP_LYMPHOCYTE_ANERGY	6	0.278782	0.527183	0.964286	0.995154	1	4773	tags=33%, list=25%, signal=44%
GOBP_LYMPHOCYTE_COSTIMULATION	22	0.339631	0.869943	0.663107	0.84886	1	1522	tags=14%, list=8%, signal=15%
GOBP_LYMPHOCYTE_HOMEOSTASIS	82	0.236654	0.799566	0.865438	0.911407	1	3932	tags=27%, list=20%, signal=34%
GOBP_LYMPHOCYTE_MIGRATION_INTO_LYMPHOID_ORGANS	6	0.785053	1.50041	0.0470701	0.170634	1	1227	tags=50%, list=6%, signal=53%
GOBP_LYSOSOMAL_MICROAUTOPHAGY	13	0.589646	1.36717	0.114367	0.291824	1	3454	tags=38%, list=18%, signal=47%
GOBP_LYSOSOMAL_TRANSPORT	121	0.358038	1.27002	0.0764444	0.390012	1	2791	tags=24%, list=14%, signal=28%
GOBP_LYTIC_VACUOLE_ORGANIZATION	95	0.260468	0.89576	0.679119	0.820071	1	3682	tags=25%, list=19%, signal=31%
GOBP_M_PHASE	11	0.192616	0.424828	0.994455	0.999145	1	6643	tags=45%, list=34%, signal=69%
GOBP_MACROMOLECULE_METHYLATION	202	0.361102	1.36493	0.0144665	0.293889	1	4864	tags=33%, list=25%, signal=44%
GOBP_MACROPHAGE_APOPTOTIC_PROCESS	9	0.591391	1.22173	0.253673	0.438218	1	1834	tags=22%, list=9%, signal=25%
GOBP_MACROPHAGE_CHEMOTAXIS	37	0.312015	0.903706	0.637051	0.810603	1	549	tags=11%, list=3%, signal=11%
GOBP_MACROPHAGE_COLONY_STIMULATING_FACTOR_PRODUCTION	5	0.306039	0.558581	0.947013	0.991214	1	5430	tags=60%, list=28%, signal=83%
GOBP_MACROPHAGE_INFLAMMATORY_PROTEIN_1_ALPHA_PRODUCTION	5	0.33175	0.599718	0.918526	0.986535	1	1751	tags=20%, list=9%, signal=22%
GOBP_MAGNESIUM_ION_HOMEOSTASIS	14	0.36349	0.848652	0.664522	0.868097	1	2877	tags=29%, list=15%, signal=34%
GOBP_MAINTENANCE_OF_ANIMAL_ORGAN_IDENTITY	4	0.654439	1.12833	0.355751	0.542487	1	1595	tags=50%, list=8%, signal=54%
GOBP_MAINTENANCE_OF_APICAL_BASAL_CELL_POLARITY	10	0.710774	1.54406	0.0353053	0.134935	1	519	tags=20%, list=3%, signal=21%
GOBP_MAINTENANCE_OF_CELL_NUMBER	193	0.243006	0.91287	0.69145	0.801576	1	3983	tags=25%, list=21%, signal=32%
GOBP_MAINTENANCE_OF_CELL_POLARITY	17	0.61843	1.50721	0.0354478	0.164991	1	2156	tags=24%, list=11%, signal=26%
GOBP_MAINTENANCE_OF_CENTROSOME_LOCATION	6	0.776202	1.47204	0.0515063	0.193852	1	1373	tags=33%, list=7%, signal=36%
GOBP_MAINTENANCE_OF_DNA_REPEAT_ELEMENTS	6	0.335901	0.632844	0.886518	0.981821	1	5029	tags=33%, list=26%, signal=45%
GOBP_MAINTENANCE_OF_GASTROINTESTINAL_EPITHELIUM	17	0.284236	0.69566	0.866038	0.965528	1	2501	tags=18%, list=13%, signal=20%
GOBP_MAINTENANCE_OF_LOCATION_IN_CELL	208	0.278616	1.06395	0.287611	0.615878	1	3432	tags=24%, list=18%, signal=28%
GOBP_MAINTENANCE_OF_ORGANELLE_LOCATION	12	0.632572	1.42006	0.0889101	0.242852	1	3128	tags=33%, list=16%, signal=40%
GOBP_MAINTENANCE_OF_POSTSYNAPTIC_SPECIALIZATION_STRUCTURE	9	0.697007	1.47165	0.0566572	0.194085	1	3676	tags=67%, list=19%, signal=82%
GOBP_MAINTENANCE_OF_SISTER_CHROMATID_COHESION	14	0.472893	1.10788	0.352995	0.566917	1	6416	tags=64%, list=33%, signal=96%
GOBP_MAINTENANCE_OF_SYNAPSE_STRUCTURE	28	0.58701	1.61769	0.0103383	0.0857807	1	2038	tags=36%, list=11%, signal=40%
GOBP_MALE_ANATOMICAL_STRUCTURE_MORPHOGENESIS	5	0.384562	0.703691	0.818725	0.962395	1	5304	tags=60%, list=27%, signal=83%
GOBP_MALE_GAMETE_GENERATION	465	0.275593	1.13463	0.0962048	0.534376	1	3549	tags=24%, list=18%, signal=29%
GOBP_MALE_MATING_BEHAVIOR	10	0.612186	1.32102	0.142723	0.338818	1	606	tags=30%, list=3%, signal=31%
GOBP_MALE_MEIOSIS_I	20	0.45473	1.1475	0.296468	0.522552	1	5330	tags=45%, list=27%, signal=62%
GOBP_MALE_MEIOTIC_NUCLEAR_DIVISION	44	0.339187	1.025	0.420552	0.662385	1	5496	tags=41%, list=28%, signal=57%
GOBP_MAMMARY_GLAND_BRANCHING_INVOLVED_IN_PREGNANCY	7	0.587181	1.14779	0.311838	0.522435	1	2910	tags=57%, list=15%, signal=67%
GOBP_MAMMARY_GLAND_EPITHELIAL_CELL_PROLIFERATION	26	0.43764	1.18009	0.220575	0.487021	1	1735	tags=23%, list=9%, signal=25%
GOBP_MANNOSYLATION	22	0.419615	1.1015	0.340038	0.574171	1	3376	tags=27%, list=17%, signal=33%
GOBP_MARGINAL_ZONE_B_CELL_DIFFERENTIATION	9	0.675595	1.42862	0.0716305	0.234016	1	3140	tags=33%, list=16%, signal=40%
GOBP_MAST_CELL_CYTOKINE_PRODUCTION	8	0.541402	1.12208	0.350226	0.549129	1	288	tags=13%, list=1%, signal=13%
GOBP_MAST_CELL_HOMEOSTASIS	6	0.494882	0.950714	0.539522	0.756396	1	825	tags=17%, list=4%, signal=17%
GOBP_MAST_CELL_PROLIFERATION	8	0.434392	0.890699	0.594752	0.825644	1	825	tags=13%, list=4%, signal=13%
GOBP_MATERNAL_PLACENTA_DEVELOPMENT	32	0.353315	0.992031	0.476839	0.703815	1	371	tags=9%, list=2%, signal=10%
GOBP_MATERNAL_PROCESS_INVOLVED_IN_FEMALE_PREGNANCY	45	0.363246	1.09952	0.307331	0.576558	1	1248	tags=13%, list=6%, signal=14%
GOBP_MATERNAL_PROCESS_INVOLVED_IN_PARTURITION	6	0.528027	0.996957	0.514554	0.698831	1	1501	tags=33%, list=8%, signal=36%
GOBP_MATING_BEHAVIOR	43	0.556412	1.65184	0.00186393	0.0667139	1	1399	tags=26%, list=7%, signal=28%
GOBP_MATURATION_OF_5_8S_RRNA	35	0.222056	0.636762	0.965388	0.98116	1	2449	tags=11%, list=13%, signal=13%
GOBP_MATURATION_OF_5_8S_RRNA_FROM_TRICISTRONIC_RRNA_TRANSCRIPT_SSU_RRNA_5_8S_RRNA_LSU_RRNA	24	0.240661	0.639788	0.929423	0.980027	1	2449	tags=13%, list=13%, signal=14%
GOBP_MATURATION_OF_LSU_RRNA_FROM_TRICISTRONIC_RRNA_TRANSCRIPT_SSU_RRNA_5_8S_RRNA_LSU_RRNA	18	0.279535	0.698577	0.865295	0.964756	1	2430	tags=17%, list=13%, signal=19%
GOBP_MATURE_B_CELL_DIFFERENTIATION	33	0.348166	0.999482	0.463324	0.695509	1	3140	tags=21%, list=16%, signal=25%
GOBP_MATURE_B_CELL_DIFFERENTIATION_INVOLVED_IN_IMMUNE_RESPONSE	25	0.435783	1.16537	0.252174	0.504905	1	1399	tags=16%, list=7%, signal=17%
GOBP_MDA_5_SIGNALING_PATHWAY	7	0.300511	0.592669	0.91171	0.986957	1	1021	tags=14%, list=5%, signal=15%
GOBP_MECHANORECEPTOR_DIFFERENTIATION	80	0.349034	1.16208	0.206439	0.508383	1	2583	tags=25%, list=13%, signal=29%
GOBP_MECHANOSENSORY_BEHAVIOR	15	0.485097	1.15252	0.30226	0.517372	1	833	tags=13%, list=4%, signal=14%
GOBP_MEDULLA_OBLONGATA_DEVELOPMENT	3	0.759395	1.20832	0.267892	0.45411	1	1438	tags=33%, list=7%, signal=36%
GOBP_MEGAKARYOCYTE_DEVELOPMENT	24	0.353621	0.939899	0.547528	0.769429	1	1801	tags=21%, list=9%, signal=23%
GOBP_MEGAKARYOCYTE_DIFFERENTIATION	46	0.269751	0.830272	0.756957	0.884348	1	2986	tags=22%, list=15%, signal=26%
GOBP_MEIOSIS_I_CELL_CYCLE_PROCESS	110	0.248192	0.859662	0.781835	0.859034	1	3198	tags=18%, list=16%, signal=22%
GOBP_MEIOTIC_CELL_CYCLE	247	0.244025	0.947547	0.622062	0.760539	1	3198	tags=18%, list=16%, signal=22%
GOBP_MEIOTIC_CELL_CYCLE_PROCESS	196	0.238992	0.908687	0.720183	0.806216	1	3198	tags=18%, list=16%, signal=22%
GOBP_MEIOTIC_CHROMOSOME_CONDENSATION	6	0.445509	0.85692	0.647738	0.861235	1	3194	tags=33%, list=16%, signal=40%
GOBP_MEIOTIC_CHROMOSOME_SEGREGATION	79	0.308003	1.03581	0.401709	0.648451	1	3198	tags=24%, list=16%, signal=29%
GOBP_MEIOTIC_CYTOKINESIS	11	0.516458	1.14184	0.326228	0.527798	1	2271	tags=55%, list=12%, signal=62%
GOBP_MEIOTIC_DNA_DOUBLE_STRAND_BREAK_FORMATION	4	0.6864	1.17636	0.294283	0.492193	1	2848	tags=25%, list=15%, signal=29%
GOBP_MEIOTIC_SISTER_CHROMATID_COHESION	9	0.610654	1.28158	0.191077	0.378034	1	3077	tags=44%, list=16%, signal=53%
GOBP_MEIOTIC_SISTER_CHROMATID_COHESION_CENTROMERIC	4	0.586675	1.00853	0.505714	0.683802	1	3077	tags=50%, list=16%, signal=59%
GOBP_MELANIN_METABOLIC_PROCESS	20	0.501274	1.26572	0.166667	0.393974	1	736	tags=15%, list=4%, signal=16%
GOBP_MELANOSOME_ASSEMBLY	19	0.253852	0.640906	0.92	0.979897	1	2791	tags=16%, list=14%, signal=18%
GOBP_MEMBRANE_BIOGENESIS	58	0.28299	0.901169	0.658112	0.813873	1	2638	tags=21%, list=14%, signal=24%
GOBP_MEMBRANE_DEPOLARIZATION	88	0.318822	1.07183	0.328872	0.608484	1	3642	tags=34%, list=19%, signal=42%
GOBP_MEMBRANE_DEPOLARIZATION_DURING_ACTION_POTENTIAL	29	0.478225	1.33576	0.094532	0.323442	1	1672	tags=28%, list=9%, signal=30%
GOBP_MEMBRANE_DEPOLARIZATION_DURING_AV_NODE_CELL_ACTION_POTENTIAL	5	0.733111	1.31241	0.145436	0.347059	1	2523	tags=60%, list=13%, signal=69%
GOBP_MEMBRANE_DEPOLARIZATION_DURING_CARDIAC_MUSCLE_CELL_ACTION_POTENTIAL	16	0.489249	1.18882	0.236449	0.476361	1	1672	tags=38%, list=9%, signal=41%
GOBP_MEMBRANE_DOCKING	86	0.2742	0.921773	0.599233	0.793099	1	3526	tags=33%, list=18%, signal=40%
GOBP_MEMBRANE_FISSION	29	0.50399	1.38397	0.0767072	0.275986	1	3218	tags=34%, list=17%, signal=41%
GOBP_MEMBRANE_FUSION	147	0.357225	1.29826	0.0479705	0.360729	1	2029	tags=19%, list=10%, signal=21%
GOBP_MEMBRANE_REPOLARIZATION_DURING_ACTION_POTENTIAL	17	0.437224	1.07749	0.36162	0.602379	1	1801	tags=29%, list=9%, signal=32%
GOBP_MEMBRANE_REPOLARIZATION_DURING_ATRIAL_CARDIAC_MUSCLE_CELL_ACTION_POTENTIAL	5	0.651478	1.16571	0.313744	0.504847	1	1801	tags=40%, list=9%, signal=44%
GOBP_MEMBRANE_REPOLARIZATION_DURING_CARDIAC_MUSCLE_CELL_ACTION_POTENTIAL	9	0.470362	0.989554	0.504762	0.706322	1	1801	tags=33%, list=9%, signal=37%
GOBP_MEMBRANE_TUBULATION	5	0.733384	1.32763	0.146641	0.331166	1	2554	tags=40%, list=13%, signal=46%
GOBP_MEMORY	156	0.511396	1.87839	0	0.00839163	0.734	2488	tags=32%, list=13%, signal=36%	associative learning
GOBP_MESANGIAL_CELL_DEVELOPMENT	4	0.607889	1.04962	0.437073	0.633465	1	692	tags=25%, list=4%, signal=26%
GOBP_MESENCHYMAL_CELL_DEVELOPMENT	6	0.360485	0.68343	0.847701	0.968555	1	736	tags=17%, list=4%, signal=17%
GOBP_MESENCHYMAL_CELL_DIFFERENTIATION_INVOLVED_IN_KIDNEY_DEVELOPMENT	3	0.664	1.074	0.434741	0.605993	1	3453	tags=67%, list=18%, signal=81%
GOBP_MESENDODERM_DEVELOPMENT	9	0.299731	0.62829	0.913408	0.983315	1	3393	tags=33%, list=17%, signal=40%
GOBP_MESODERM_DEVELOPMENT	98	0.245554	0.84392	0.799078	0.870981	1	1038	tags=9%, list=5%, signal=10%
GOBP_MESODERMAL_CELL_MIGRATION	5	0.786752	1.43867	0.0732394	0.223665	1	130	tags=20%, list=1%, signal=20%
GOBP_MESONEPHRIC_DUCT_DEVELOPMENT	5	0.595915	1.06908	0.425331	0.610106	1	845	tags=40%, list=4%, signal=42%
GOBP_MESONEPHRIC_DUCT_MORPHOGENESIS	4	0.445296	0.757331	0.790634	0.937698	1	692	tags=25%, list=4%, signal=26%
GOBP_METANEPHRIC_COLLECTING_DUCT_DEVELOPMENT	4	0.799782	1.36008	0.0910816	0.298841	1	297	tags=25%, list=2%, signal=25%
GOBP_METANEPHRIC_MESENCHYME_DEVELOPMENT	7	0.423941	0.843896	0.648596	0.870887	1	3393	tags=43%, list=17%, signal=52%
GOBP_METAPHASE_ANAPHASE_TRANSITION_OF_CELL_CYCLE	91	0.266394	0.916153	0.615865	0.798043	1	5707	tags=35%, list=29%, signal=50%
GOBP_METENCEPHALON_DEVELOPMENT	114	0.393037	1.39182	0.0211397	0.266906	1	2998	tags=26%, list=15%, signal=31%
GOBP_METHYLATION	253	0.308938	1.20988	0.0634633	0.452596	1	4864	tags=32%, list=25%, signal=42%
GOBP_METHYLGUANOSINE_CAP_DECAPPING	16	0.461802	1.11406	0.321293	0.558606	1	2768	tags=31%, list=14%, signal=36%
GOBP_MICROTUBULE_ANCHORING	24	0.71963	1.90589	0	0.00585283	0.5325	2685	tags=50%, list=14%, signal=58%
GOBP_MICROTUBULE_ANCHORING_AT_MICROTUBULE_ORGANIZING_CENTER	13	0.731352	1.69585	0.00551978	0.0476918	1	2685	tags=62%, list=14%, signal=71%
GOBP_MICROTUBULE_BASED_MOVEMENT	377	0.327235	1.32024	0.00880282	0.339167	1	3647	tags=31%, list=19%, signal=37%
GOBP_MICROTUBULE_BASED_PROTEIN_TRANSPORT	16	0.370763	0.890716	0.596226	0.825748	1	2240	tags=31%, list=12%, signal=35%
GOBP_MICROTUBULE_BASED_TRANSPORT	211	0.394914	1.50295	0.00268577	0.168539	1	3647	tags=35%, list=19%, signal=42%
GOBP_MICROTUBULE_BUNDLE_FORMATION	123	0.407277	1.43816	0.0127621	0.22375	1	4439	tags=38%, list=23%, signal=49%	motile cilium movement cerebrospinal
GOBP_MICROTUBULE_CYTOSKELETON_ORGANIZATION_INVOLVED_IN_MITOSIS	157	0.284617	1.06053	0.299812	0.620137	1	3929	tags=25%, list=20%, signal=31%
GOBP_MICROTUBULE_DEPOLYMERIZATION	58	0.362767	1.14903	0.225599	0.521821	1	4532	tags=34%, list=23%, signal=45%
GOBP_MICROTUBULE_NUCLEATION	35	0.365759	1.04413	0.402778	0.639887	1	3834	tags=40%, list=20%, signal=50%
GOBP_MICROTUBULE_NUCLEATION_BY_MICROTUBULE_ORGANIZING_CENTER	5	0.606805	1.09669	0.389356	0.579702	1	6210	tags=80%, list=32%, signal=118%
GOBP_MICROTUBULE_ORGANIZING_CENTER_LOCALIZATION	34	0.328675	0.929884	0.564004	0.783658	1	3417	tags=35%, list=18%, signal=43%
GOBP_MICROTUBULE_ORGANIZING_CENTER_ORGANIZATION	147	0.325037	1.18794	0.126489	0.477102	1	3995	tags=29%, list=21%, signal=37%
GOBP_MICROTUBULE_POLYMERIZATION	83	0.295426	1.00175	0.458052	0.692894	1	2685	tags=23%, list=14%, signal=26%
GOBP_MICROTUBULE_POLYMERIZATION_OR_DEPOLYMERIZATION	128	0.286498	1.0259	0.386555	0.661218	1	2891	tags=23%, list=15%, signal=26%
GOBP_MICROTUBULE_SEVERING	6	0.546215	1.04671	0.443587	0.637234	1	2838	tags=33%, list=15%, signal=39%
GOBP_MICROVILLUS_ASSEMBLY	18	0.438479	1.08533	0.372642	0.592891	1	1308	tags=33%, list=7%, signal=36%
GOBP_MICROVILLUS_ORGANIZATION	23	0.400933	1.06202	0.388634	0.618175	1	1308	tags=26%, list=7%, signal=28%
GOBP_MICTURITION	9	0.4984	1.05816	0.412162	0.622543	1	5218	tags=56%, list=27%, signal=76%
GOBP_MIRNA_MEDIATED_GENE_SILENCING_BY_MRNA_DESTABILIZATION	2	0.577321	0.844923	0.72093	0.870256	1	2436	tags=50%, list=13%, signal=57%
GOBP_MIRNA_METABOLIC_PROCESS	93	0.25343	0.861186	0.751174	0.857725	1	4098	tags=28%, list=21%, signal=35%
GOBP_MIRNA_PROCESSING	42	0.414635	1.23954	0.159886	0.419808	1	3666	tags=38%, list=19%, signal=47%
GOBP_MIRNA_TRANSCRIPTION	68	0.275291	0.886661	0.685874	0.830673	1	2911	tags=22%, list=15%, signal=26%
GOBP_MISMATCH_REPAIR	24	0.223723	0.593774	0.960039	0.986748	1	2766	tags=17%, list=14%, signal=19%
GOBP_MITOCHONDRIAL_CALCIUM_ION_HOMEOSTASIS	28	0.27343	0.74643	0.849765	0.943831	1	4818	tags=39%, list=25%, signal=52%
GOBP_MITOCHONDRIAL_DEPOLARIZATION	25	0.376383	1.01269	0.444976	0.679589	1	4115	tags=48%, list=21%, signal=61%
GOBP_MITOCHONDRIAL_DNA_METABOLIC_PROCESS	26	0.273356	0.727768	0.859195	0.952318	1	6322	tags=46%, list=33%, signal=68%
GOBP_MITOCHONDRIAL_DNA_REPAIR	6	0.462556	0.895587	0.601525	0.820029	1	6151	tags=67%, list=32%, signal=98%
GOBP_MITOCHONDRIAL_DNA_REPLICATION	16	0.297517	0.731482	0.821905	0.950752	1	6322	tags=50%, list=33%, signal=74%
GOBP_MITOCHONDRIAL_FISSION	50	0.264773	0.824532	0.772812	0.889281	1	3357	tags=22%, list=17%, signal=27%
GOBP_MITOCHONDRIAL_FRAGMENTATION_INVOLVED_IN_APOPTOTIC_PROCESS	12	0.653967	1.45574	0.0648148	0.206062	1	2029	tags=33%, list=10%, signal=37%
GOBP_MITOCHONDRIAL_FUSION	33	0.299331	0.852542	0.708837	0.864278	1	3509	tags=24%, list=18%, signal=30%
GOBP_MITOCHONDRIAL_GENOME_MAINTENANCE	35	0.360103	1.04392	0.374421	0.639962	1	3411	tags=23%, list=18%, signal=28%
GOBP_MITOCHONDRIAL_OUTER_MEMBRANE_PERMEABILIZATION_INVOLVED_IN_PROGRAMMED_CELL_DEATH	37	0.231393	0.676847	0.939671	0.970724	1	4063	tags=22%, list=21%, signal=27%
GOBP_MITOCHONDRIAL_PROTEIN_CATABOLIC_PROCESS	7	0.59085	1.16544	0.309819	0.50503	1	508	tags=14%, list=3%, signal=15%
GOBP_MITOCHONDRIAL_PROTEIN_PROCESSING	13	0.393204	0.899098	0.618095	0.816125	1	3291	tags=23%, list=17%, signal=28%
GOBP_MITOCHONDRIAL_RNA_3_END_PROCESSING	6	0.518474	0.969402	0.542969	0.733026	1	7123	tags=83%, list=37%, signal=132%
GOBP_MITOCHONDRIAL_RNA_METABOLIC_PROCESS	52	0.229515	0.708592	0.943519	0.961174	1	5523	tags=35%, list=28%, signal=48%
GOBP_MITOCHONDRIAL_RNA_MODIFICATION	8	0.50411	1.02898	0.452602	0.657376	1	5383	tags=63%, list=28%, signal=86%
GOBP_MITOCHONDRIAL_RNA_PROCESSING	19	0.252122	0.635288	0.931839	0.981064	1	5523	tags=47%, list=28%, signal=66%
GOBP_MITOCHONDRIAL_TRANSPORT	148	0.250822	0.919434	0.658112	0.794879	1	1988	tags=12%, list=10%, signal=13%
GOBP_MITOCHONDRIAL_TRNA_PROCESSING	12	0.542618	1.2455	0.19697	0.413495	1	5523	tags=67%, list=28%, signal=93%
GOBP_MITOCHONDRION_LOCALIZATION	53	0.36767	1.13553	0.25592	0.533439	1	2118	tags=26%, list=11%, signal=30%
GOBP_MITOPHAGY	41	0.205532	0.614103	0.976879	0.985192	1	4810	tags=34%, list=25%, signal=45%
GOBP_MITOTIC_CELL_CYCLE_EMBRYONIC	5	0.418769	0.74547	0.810427	0.944658	1	515	tags=20%, list=3%, signal=21%
GOBP_MITOTIC_CELL_CYCLE_PHASE	4	0.606034	1.05331	0.433302	0.62892	1	6504	tags=50%, list=34%, signal=75%
GOBP_MITOTIC_CELL_CYCLE_PHASE_TRANSITION	427	0.250461	1.02476	0.353928	0.662678	1	3164	tags=20%, list=16%, signal=23%
GOBP_MITOTIC_CHROMOSOME_CONDENSATION	15	0.43197	1.04222	0.432156	0.641409	1	4387	tags=33%, list=23%, signal=43%
GOBP_MITOTIC_CYTOKINESIS	80	0.252128	0.834903	0.808007	0.879726	1	3218	tags=21%, list=17%, signal=25%
GOBP_MITOTIC_CYTOKINETIC_PROCESS	25	0.284278	0.766379	0.813653	0.933112	1	3037	tags=16%, list=16%, signal=19%
GOBP_MITOTIC_DNA_REPLICATION	16	0.252696	0.616467	0.940422	0.985471	1	6066	tags=31%, list=31%, signal=45%
GOBP_MITOTIC_SISTER_CHROMATID_COHESION	26	0.540122	1.46559	0.0410065	0.198568	1	5126	tags=54%, list=26%, signal=73%
GOBP_MITOTIC_SISTER_CHROMATID_SEGREGATION	172	0.209751	0.782712	0.95781	0.924456	1	4453	tags=23%, list=23%, signal=30%
GOBP_MITOTIC_SPINDLE_ASSEMBLY	71	0.30041	0.989604	0.464253	0.706337	1	3929	tags=25%, list=20%, signal=32%
GOBP_MITOTIC_SPINDLE_ELONGATION	9	0.352326	0.743195	0.796642	0.94559	1	5083	tags=33%, list=26%, signal=45%
GOBP_MITOTIC_SPINDLE_ORGANIZATION	125	0.280967	1.0098	0.421495	0.682881	1	3452	tags=22%, list=18%, signal=27%
GOBP_MITRAL_VALVE_FORMATION	4	0.279577	0.484963	0.980189	0.998086	1	3750	tags=25%, list=19%, signal=31%
GOBP_MODIFICATION_OF_POSTSYNAPTIC_ACTIN_CYTOSKELETON	20	0.7055	1.79766	0.00278552	0.020556	0.998	2592	tags=55%, list=13%, signal=63%
GOBP_MODIFICATION_OF_POSTSYNAPTIC_STRUCTURE	34	0.700765	1.99706	0	0.00130601	0.0945	2592	tags=53%, list=13%, signal=61%	dendrite development
GOBP_MODIFICATION_OF_SYNAPTIC_STRUCTURE	42	0.682215	2.0384	0	0.00074211	0.039	2592	tags=50%, list=13%, signal=58%	dendrite development
GOBP_MODULATION_BY_HOST_OF_SYMBIONT_PROCESS	75	0.202798	0.678346	0.97832	0.970377	1	1658	tags=8%, list=9%, signal=9%
GOBP_MODULATION_BY_HOST_OF_VIRAL_GENOME_REPLICATION	23	0.21909	0.574058	0.974552	0.989098	1	7402	tags=43%, list=38%, signal=70%
GOBP_MODULATION_BY_HOST_OF_VIRAL_PROCESS	43	0.308338	0.918959	0.606032	0.794973	1	1052	tags=9%, list=5%, signal=10%
GOBP_MODULATION_BY_HOST_OF_VIRAL_RNA_GENOME_REPLICATION	6	0.419379	0.797112	0.723301	0.913176	1	1052	tags=17%, list=5%, signal=18%
GOBP_MODULATION_BY_VIRUS_OF_HOST_PROCESS	5	0.305802	0.552921	0.948864	0.992267	1	5265	tags=40%, list=27%, signal=55%
GOBP_MODULATION_OF_EXCITATORY_POSTSYNAPTIC_POTENTIAL	62	0.507267	1.64158	0.000926784	0.072595	1	2488	tags=34%, list=13%, signal=39%	synaptic transmission
GOBP_MODULATION_OF_INHIBITORY_POSTSYNAPTIC_POTENTIAL	10	0.55205	1.17405	0.279778	0.495191	1	4069	tags=50%, list=21%, signal=63%
GOBP_MONOACYLGLYCEROL_BIOSYNTHETIC_PROCESS	5	0.376129	0.685378	0.820982	0.968349	1	1296	tags=20%, list=7%, signal=21%
GOBP_MONOAMINE_TRANSPORT	106	0.420593	1.48075	0.00550459	0.185604	1	2759	tags=28%, list=14%, signal=33%
GOBP_MONOATOMIC_ANION_TRANSMEMBRANE_TRANSPORT	78	0.47645	1.59351	0.00183993	0.100856	1	3231	tags=31%, list=17%, signal=37%
GOBP_MONOATOMIC_ANION_TRANSPORT	125	0.305727	1.08279	0.295203	0.595105	1	1352	tags=17%, list=7%, signal=18%
GOBP_MONOCYTE_ACTIVATION	8	0.3489	0.724813	0.809432	0.95386	1	3938	tags=25%, list=20%, signal=31%
GOBP_MONOCYTE_AGGREGATION	7	0.395632	0.782619	0.727794	0.924302	1	2042	tags=29%, list=11%, signal=32%
GOBP_MONOSACCHARIDE_CATABOLIC_PROCESS	44	0.265607	0.795872	0.812559	0.91417	1	2822	tags=20%, list=15%, signal=24%
[truncated: 6,175 more rows]

## Sheet: KO-1 neg
NAME	SIZE	ES	NES	NOM.p.val	FDR.q.val	FWER.p.val	RANK.AT.MAX	LEADING.EDGE	clusterName
[truncated: 7,649 more rows]

[truncated: 3 more sheets: KO-1 pos, KO-2 neg, KO-2 pos]
