# Supplementary material for: An X-linked long non-coding RNA, PTCHD1-AS, regulates autistic behaviors in humans and in mice
Source: Research Square preprint supplement (doi:10.21203/rs.3.rs-5619348/v1), 2025-01-13
Supplement: Supplementary file 7 [file Supplementary Table 15.xlsx]

## Sheet: Sheet1
Gene name	Pseudobulk_avg_log2FC	Pseudobulk_pval	Pseudobulk_padj	Total_log2FoldChange	Total_pvalue	Total_padj	human ASD gene
Abat	0.132428	5.14908e-14	1.55925e-09	0.0172528	0.671625	0.916122	ABAT
Abce1	0.00918853	0.143096	1	0.0563093	0.0855779	0.480007	ABCE1
Abl2	0.047155	0.000411906	0.944586	0.0920783	0.0374004	0.331105	ABL2
Actb	0.162217	2.64904e-16	8.02182e-12	-0.0330167	0.317993	0.751909	ACTB
Actl6b	0.113851	7.76391e-17	2.35107e-12	0.0387601	0.222746	0.67177	ACTL6B
Actn4	-0.0168421	0.677569	1	0.02306	0.42644	0.818324	ACTN4
Adcy3	0.060517	0.000722372	0.710683	0.0763093	0.0226401	0.261487	ADCY3
Adcy5	0.315213	4.02438e-36	1.21866e-31	0.041015	0.323808	0.756352	ADCY5
Adgrl1	0.235871	3.28491e-28	9.94735e-24	0.0228395	0.495054	0.854579	ADGRL1
Adk	-0.0524228	0.657246	1	-0.0910017	0.0293611	0.299175	ADK
Adora2a	0.0770796	8.89679e-06	0.227665	-0.00105213	0.982919	0.995937	ADORA2A
Adss	0.0417999	0.00260477	1	0.0343741	0.261079	0.705856	ADSS2
Aff2	-0.0633332	0.0489479	1	0.129279	0.190934	0.637835	AFF2
Agap1	-0.297959	5.47129e-24	1.65681e-19	-0.0295817	0.523749	0.865814	AGAP1
Agap2	0.166283	2.42527e-28	7.3442e-24	0.0678852	0.0536409	0.388203	AGAP2
Agbl4	-0.0480606	2.09545e-09	6.34545e-05	0.0800692	0.255053	0.701062	AGBL4
Ago1	0.0302027	0.00696897	1	0.0483783	0.153732	0.599228	AGO1
Ago2	0.0694603	4.52673e-05	0.644708	0.0766588	0.175411	0.622434	AGO2
Ago3	-0.078249	0.000273852	0.959977	-0.024164	0.692184	0.921009	AGO3
Ago4	0.0576991	0.000352945	0.83474	-0.0376798	0.419079	0.813994	AGO4
Ahdc1	0.0415814	0.000793769	0.88017	0.0188666	0.663525	0.914166	AHDC1
Ahi1	0.0479674	0.0275515	1	0.115535	0.000535702	0.0296996	AHI1
Akap9	0.0229283	0.533269	1	0.108383	0.0434199	0.353261	AKAP9
Aldh5a1	0.0278996	0.00473206	1	0.0378405	0.25744	0.702676	ALDH5A1
Ank2	-0.27597	3.65944e-29	1.10815e-24	0.0624877	0.20392	0.65284	ANK2
Ank3	0.129299	3.73894e-14	1.13223e-09	-0.00272643	0.971057	0.993238	ANK3
Ankrd11	-0.0920109	4.77862e-05	0.590767	0.0193963	0.617055	0.896896	ANKRD11
Ankrd17	0.0230696	0.0961099	1	0.0858454	0.0501769	0.377634	ANKRD17
Anks1b	0.0621595	2.1328e-05	0.319464	0.0487076	0.152046	0.596017	ANKS1B
Anp32a	0.0606853	6.44699e-06	0.195228	0.0201671	0.550477	0.875058	ANP32A
Ap1s2	0.0303653	0.00723829	1	-0.0302221	0.540189	0.872148	AP1S2
Apba2	-0.00449546	0.700371	1	0.0237913	0.511961	0.860297	APBA2
Apbb1	0.0153897	0.0152067	1	-0.00825601	0.756275	0.940208	APBB1
Ar	0.0745016	6.74987e-06	0.2044	0.0381721	0.487242	0.850639	AR
Arf3	0.0899682	5.3619e-10	1.62369e-05	0.0514223	0.074301	0.451746	ARF3
Arhgap32	-0.00415397	0.320683	1	0.182116	1.56351e-05	0.00267545	ARHGAP32
Arhgap5	-0.123703	0.0822823	1	0.024188	0.469174	0.841649	ARHGAP5
Arhgef10	-0.196204	7.7096e-20	2.33462e-15	-0.0991932	0.0209594	0.25153	ARHGEF10
Arhgef2	0.0207371	0.014583	0.901571	-0.02563	0.369856	0.786583	ARHGEF2
Arhgef9	0.0846796	0.00186269	1	0.092157	0.00389997	0.105665	ARHGEF9
Arid1b	-0.0267641	0.328627	1	0.0229543	0.519157	0.863049	ARID1B
Arid2	-0.0250352	0.621644	1	0.0596184	0.149162	0.592277	ARID2
Arnt2	-0.0846419	0.0276198	1	0.044838	0.240721	0.691688	ARNT2
Asap2	-0.009874	0.663963	1	-0.0229307	0.61702	0.896896	ASAP2
Ash1l	-0.0233268	0.217777	1	0.0689625	0.178166	0.626766	ASH1L
Astn2	-0.196343	4.12038e-15	1.24773e-10	-0.0191228	0.689549	0.920218	ASTN2
Asxl3	-0.0987381	0.000305555	0.361882	0.0669962	0.339796	0.764277	ASXL3
Atp1a1	0.17658	4.73107e-28	1.43266e-23	0.0368853	0.216932	0.66637	ATP1A1
Atp1a3	0.269567	1.71787e-37	5.20204e-33	-0.0145179	0.650921	0.908408	ATP1A3
Atp2b1	0.299741	3.32633e-38	1.00728e-33	0.0634413	0.133251	0.566686	ATP2B1
Atp2b2	0.181824	8.06056e-19	2.4409e-14	0.0262385	0.494963	0.854579	ATP2B2
Atp6v0a2	0.0463994	0.0011451	0.872258	0.00207033	0.948944	0.988246	ATP6V0A2
Atrx	-0.0570147	0.00237461	1	0.0797926	0.0719599	0.445548	ATRX
Auts2	0.0454663	0.00611072	1	-0.0014676	0.974241	0.993945	AUTS2
Baz2b	-0.30927	4.40797e-24	1.33482e-19	-0.0135972	0.773931	0.945804	BAZ2B
Bbs4	0.0320609	0.0226617	1	0.0292344	0.400725	0.805185	BBS4
Bcas1	-0.256646	9.23162e-28	2.79552e-23	-0.200624	7.65351e-06	0.00155522	BCAS1
Bcl11a	-0.0161712	0.0568364	1	0.067236	0.0722281	0.445896	BCL11A
Bicdl1	0.0801733	9.25297e-07	0.0280198	-0.0182959	0.67226	0.916122	BICDL1
Bicra	-0.023248	0.474883	1	0.0155222	0.783269	0.948327	BICRA
Birc6	-0.0605537	3.98536e-05	0.74648	0.0284637	0.74715	0.936367	BIRC6
Braf	0.00327917	0.294233	1	0.0489347	0.318779	0.752672	BRAF
Brd4	0.0153765	0.0601659	1	0.00277102	0.947431	0.987939	BRD4
Brinp3	0.0829909	0.583609	1	-0.076103	0.0916036	0.493908	BRINP3
Brsk2	0.0235078	0.00552113	1	0.02174	0.450314	0.83084	BRSK2
Brwd3	0.0504806	0.00225723	1	0.0692672	0.17613	0.623454	BRWD3
Btaf1	-0.121844	2.77769e-09	8.4114e-05	0.0963392	0.0646018	0.42394	BTAF1
Btrc	-0.0284044	0.148393	1	0.0581689	0.0589681	0.406187	BTRC
Cacna1a	0.0583517	9.79748e-05	0.597895	0.0151206	0.707749	0.924217	CACNA1A
Cacna1b	0.0455306	0.270032	1	0.103132	0.0582886	0.403429	CACNA1B
Cacna1c	0.133442	1.32652e-11	4.01697e-07	0.0754131	0.183459	0.631473	CACNA1C
Cacna1d	0.113043	1.38451e-09	4.19257e-05	0.0253502	0.649635	0.907757	CACNA1D
Cacna1e	0.273561	4.95551e-40	1.50063e-35	0.126647	0.117854	0.539858	CACNA1E
Cacna1h	0.10284	1.24872e-13	3.78139e-09	0.045532	0.304088	0.738763	CACNA1H
Cacna1i	0.0943215	1.28557e-10	3.89296e-06	0.0306023	0.431417	0.82086	CACNA1I
Cacna2d1	0.0210982	0.0149222	1	0.0734368	0.062597	0.420059	CACNA2D1
Cacna2d3	0.298383	4.70248e-32	1.424e-27	0.0481681	0.214284	0.664782	CACNA2D3
Cacnb1	0.0607388	8.65321e-07	0.0262036	0.0783575	0.0174096	0.233414	CACNB1
Cacnb2	0.173757	3.47177e-19	1.05132e-14	0.146881	0.00384704	0.104667	CACNB2
Cadm1	0.156225	3.34333e-06	0.101243	0.124184	0.00215659	0.0722848	CADM1
Cadm2	0.156339	2.97711e-16	9.01528e-12	0.00113156	0.981345	0.995292	CADM2
Cadps	-0.133545	6.33384e-06	0.191801	-0.0118951	0.761681	0.941272	CADPS
Camk2a	0.0991452	2.39487e-05	0.608984	0.0823444	0.0840069	0.47534	CAMK2A
Camk2b	0.252577	4.98755e-32	1.51033e-27	0.0338372	0.202917	0.651623	CAMK2B
Camk4	0.102344	8.26762e-08	0.0025036	0.150322	0.00516128	0.122751	CAMK4
Camta2	0.03059	0.00111995	1	0.0415013	0.182657	0.630429	CAMTA2
Caprin1	0.0604165	4.61982e-05	0.363057	0.0469763	0.111421	0.529812	CAPRIN1
Cask	-0.109213	2.20521e-08	0.00066778	0.0334602	0.384402	0.795216	CASK
Caskin1	0.0478672	0.000254145	0.721633	0.00812839	0.837882	0.962097	CASKIN1
Ccdc88c	0.0969672	1.13615e-08	0.000344048	0.0605035	0.147801	0.590702	CCDC88C
Ccnk	0.0280717	0.0217014	1	-0.0366365	0.441034	0.825578	CCNK
Ccser1	0.0472756	0.000143138	0.411948	0.0853912	0.131362	0.563339	CCSER1
Cct4	0.0262345	0.0241711	1	0.02986	0.360763	0.779355	CCT4
Cd99l2	0.0206118	0.0750212	1	0.0230556	0.49501	0.854579	CD99L2
Cdc42	0.0459246	0.000415976	0.975886	-0.00144372	0.962454	0.992328	CDC42
Cdc42bpb	-0.0126488	0.447513	1	0.0536398	0.134962	0.570419	CDC42BPB
Cdh10	-0.271932	5.64553e-20	1.70958e-15	0.0911509	0.0316407	0.308925	CDH10
Cdh11	-0.100788	4.98045e-08	0.00150818	0.0947327	0.0700885	0.440378	CDH11
Cdh13	-0.0847403	2.00891e-06	0.0608338	0.0354757	0.427617	0.818419	CDH13
Cdh8	0.19222	7.9245e-15	2.3997e-10	0.114092	0.000980777	0.0455536	CDH8
Cdh9	0.0489958	0.167638	1	0.108922	0.035051	0.322375	CDH9
Cdk13	-0.0211446	0.197047	1	0.0096476	0.821145	0.95817	CDK13
Cdk19	-0.444035	4.14055e-20	1.25384e-15	-0.0318548	0.445756	0.827857	CDK19
Cdk8	0.0779572	0.000952372	0.868429	0.00960024	0.828968	0.960159	CDK8
Cdkl5	0.0419375	0.0579058	1	0.108911	0.0135211	0.20663	CDKL5
Cdon	0.0312943	0.010606	1	0.195098	0.00529351	0.123817	CDON
Celf2	0.35032	2.73469e-41	8.2812e-37	0.0475371	0.141451	0.579757	CELF2
Celf4	0.0723849	0.00798058	1	0.0572509	0.0467771	0.364273	CELF4
Cep135	0.0156434	0.0850036	1	0.0580447	0.339414	0.764028	CEP135
Cep290	0.0235581	0.0663957	1	0.0155602	0.761634	0.941272	CEP290
Chd1	-0.00339664	0.434051	1	0.0290305	0.533197	0.87083	CHD1
Chd2	0.0234772	0.733062	1	0.0236778	0.629918	0.901633	CHD2
Chd3	0.179985	9.7441e-23	2.95071e-18	0.0536413	0.162118	0.60882	CHD3
Chd7	-0.170204	2.86295e-13	8.66958e-09	-0.0927025	0.0425231	0.35112	CHD7
Chd8	0.0337307	0.024882	1	0.00674757	0.867281	0.969406	CHD8
Chd9	-0.0639066	0.0618049	1	0.0036005	0.939411	0.98612	CHD9
Chm	-0.0176126	0.769593	1	0.0791622	0.0421597	0.349005	CHM
Chrm3	-0.140193	4.78115e-19	1.44783e-14	0.0799127	0.0711022	0.443068	CHRM3
Chrna7	0.0113887	0.168234	1	0.124214	0.0631341	0.421193	CHRNA7
Clasp1	0.0298893	0.0353417	1	0.0573167	0.14367	0.584013	CLASP1
Clcn4	0.0777414	1.84154e-09	5.57655e-05	0.0199544	0.492884	0.85386	CLCN4
Cmip	0.00969001	0.141274	1	0.0955133	0.00248941	0.0786363	CMIP
Cnksr2	0.192001	1.84023e-18	5.57259e-14	0.205028	1.98052e-05	0.00306626	CNKSR2
Cnot1	0.00796092	0.443029	1	0.050369	0.248279	0.697811	CNOT1
Cnot3	0.113726	5.62168e-13	1.70236e-08	0.0312389	0.458024	0.836297	CNOT3
Cnr1	0.0408924	0.000393772	0.8878	0.107598	0.0412851	0.345726	CNR1
Cntn3	0.0444156	0.687473	1	0.0569279	0.33133	0.760146	CNTN3
Cntn4	0.111884	9.30034e-08	0.00281633	0.0880995	0.0516414	0.382458	CNTN4
Cntn5	0.203758	2.11615e-18	6.40812e-14	0.128687	0.0563046	0.396229	CNTN5
Cntn6	0.0740131	1.0297e-05	0.311815	0.0902747	0.160992	0.607355	CNTN6
Cntnap2	0.237625	1.42409e-28	4.31242e-24	0.0213582	0.788306	0.9493	CNTNAP2
Cntnap3	0.0698851	0.0021219	0.939569	0.0910781	0.0554056	0.393686	CNTNAP3
Cntnap4	-0.109599	0.114626	1	0.151041	0.0129939	0.202135	CNTNAP4
Coro2b	0.0713772	3.24992e-06	0.0984141	-0.00491816	0.867937	0.969406	CORO2B
Cpeb4	0.0204121	0.593775	1	0.0377626	0.365022	0.782858	CPEB4
Cpsf7	-0.0134929	0.744484	1	0.0451614	0.20291	0.651623	CPSF7
Crebbp	-0.0525841	0.00853942	1	-0.0354557	0.514701	0.860971	CREBBP
Csde1	0.0252175	0.00254965	1	0.00157099	0.953418	0.989798	CSDE1
Csmd1	0.100464	3.18177e-08	0.000963504	0.0808582	0.204737	0.6534	CSMD1
Csmd3	0.0875151	5.62637e-08	0.00170378	0.0440436	0.650729	0.908408	CSMD3
Csnk1g1	0.0817892	3.43648e-05	0.597532	0.112918	0.00190293	0.0678183	CSNK1G1
Csnk2a1	0.0741362	5.50321e-06	0.166648	0.0075948	0.783386	0.948327	CSNK2A1
Ctcf	-0.0275842	0.474346	1	0.0312554	0.35182	0.773136	CTCF
Ctnna2	-0.0241192	0.484273	1	0.0268814	0.362505	0.781421	CTNNA2
Ctnna3	-0.216761	4.95635e-06	0.150088	0.160611	0.20235	0.651378	CTNNA3
Ctnnb1	0.0957765	3.16699e-12	9.59028e-08	0.00725502	0.807019	0.955197	CTNNB1
Ctnnd2	0.0750107	4.77338e-07	0.0144547	0.0179034	0.531511	0.869582	CTNND2
Ctr9	0.00408749	0.317498	1	0.0420037	0.217185	0.66637	CTR9
Cttnbp2	0.0480126	0.00557988	1	0.0605403	0.121627	0.547331	CTTNBP2
Cul3	0.0237371	0.022912	1	0.0424967	0.169083	0.615327	CUL3
Cux1	0.0133025	0.0536725	1	-0.0149406	0.69696	0.922415	CUX1
Cux2	-0.0585767	0.00188326	1	0.0869027	0.180086	0.627718	CUX2
Cyfip1	-0.0141848	0.153116	1	0.00745192	0.826343	0.960031	CYFIP1
Dagla	0.0643544	4.86281e-08	0.00147256	0.0251115	0.430252	0.81949	DAGLA
Dcc	0.218327	7.93007e-22	2.40138e-17	0.0157117	0.77516	0.946017	DCC
Ddhd2	0.0193427	0.0881099	1	0.029259	0.378123	0.791839	DDHD2
Ddx3x	0.023802	0.0326397	1	0.0464154	0.137548	0.574253	DDX3X
Depdc5	-0.0108424	0.470551	1	0.0800283	0.0488601	0.371086	DEPDC5
Dhx30	0.00871092	0.301317	1	0.0429681	0.190251	0.636699	DHX30
Dip2a	-0.222309	3.80156e-15	1.15119e-10	-0.103044	0.0054477	0.125839	DIP2A
Dip2c	0.00676196	0.138189	1	0.0844036	0.0194187	0.243529	DIP2C
Dixdc1	-0.0584681	0.649899	1	0.010306	0.750738	0.937631	DIXDC1
Dlg1	-0.192431	9.5182e-10	2.8823e-05	0.0528453	0.107546	0.522401	DLG1
Dlg2	0.284256	4.53039e-38	1.37189e-33	0.0883211	0.0254694	0.277644	DLG2
Dlg4	0.157029	1.7291e-21	5.23606e-17	0.0334357	0.242542	0.693989	DLG4
Dlgap1	-0.155445	0.00106382	1	0.0588041	0.140651	0.578144	DLGAP1
Dlgap2	0.138043	1.86037e-13	5.63356e-09	0.156904	3.05792e-05	0.00418613	DLGAP2
Dlgap3	0.167434	4.92397e-15	1.49108e-10	0.0113292	0.74626	0.935837	DLGAP3
Dmd	0.0867241	0.00220913	1	0.059811	0.163193	0.609794	DMD
Dmxl2	-0.000214613	0.22559	1	0.0789537	0.131876	0.564543	DMXL2
Dner	-0.0511882	0.0872445	1	0.0364656	0.376358	0.79127	DNER
Dnmt3a	0.0368287	0.092055	1	-0.00739085	0.856842	0.967458	DNMT3A
Dock1	-0.246724	2.26914e-19	6.8714e-15	-0.077068	0.104595	0.519153	DOCK1
Dock4	-0.0290925	0.0885865	1	0.118486	3.91221e-05	0.00493965	DOCK4
Dpp10	-0.100851	5.97923e-06	0.181063	0.110279	0.0123579	0.196009	DPP10
Dpp6	0.0680964	1.03887e-06	0.031459	0.0266241	0.417441	0.812823	DPP6
Dpyd	0.0441553	0.154482	1	0.0202779	0.82423	0.959389	DPYD
Dpysl2	-0.0652099	0.563154	1	-0.114191	0.00190861	0.0678183	DPYSL2
Drd1	0.174047	1.1466e-15	3.47214e-11	0.0556142	0.152687	0.597381	DRD1
Drd2	0.116142	9.36701e-07	0.0283652	0.024206	0.622587	0.8989	DRD2
Dscam	-0.203795	1.09034e-22	3.30177e-18	0.0268293	0.483556	0.848611	DSCAM
Dst	-0.141114	1.5734e-05	0.34359	0.0126303	0.892185	0.975282	DST
Dync1h1	0.0634377	6.35606e-06	0.192474	-0.0374593	0.703948	0.923573	DYNC1H1
Dyrk1a	-0.0527294	0.240679	1	0.0237638	0.570775	0.881959	DYRK1A
Ecpas	0.0163902	0.192937	1	0.0357072	0.33441	0.761452	ECPAS
Eef1a2	0.118285	8.94689e-15	2.7093e-10	0.00265495	0.920612	0.980714	EEF1A2
Egr3	0.142602	2.26249e-14	6.85128e-10	0.0679536	0.102333	0.515125	EGR3
Ehmt1	-0.0290641	0.709528	1	0.0617758	0.128594	0.558387	EHMT1
Eif4e	-0.00161212	0.506367	1	0.0497165	0.104319	0.518902	EIF4E
Eif4g1	0.0289152	0.000322018	1	0.0240683	0.43168	0.820966	EIF4G1
Elavl2	-0.20635	0.00425747	1	-0.0148855	0.743843	0.935034	ELAVL2
Elavl3	-0.0220186	0.312179	1	-0.0454509	0.0823743	0.47292	ELAVL3
Elp2	0.0163447	0.217932	1	0.0337675	0.332868	0.760146	ELP2
Elp4	-0.020783	0.390349	1	0.116892	0.0356314	0.324642	ELP4
Emsy	0.0582	8.24796e-05	0.853277	-0.000598112	0.988361	0.996483	EMSY
Ep300	0.0719277	4.78618e-05	0.627407	0.0653139	0.233214	0.683017	EP300
Ep400	-0.00154984	0.116497	1	0.0354397	0.5356	0.871011	EP400
Epc2	-0.0253016	0.798724	1	0.0936818	0.0165642	0.229901	EPC2
Ephb1	-0.0412309	0.787796	1	-0.00637286	0.863658	0.968513	EPHB1
Erbin	-0.401535	3.87827e-24	1.17442e-19	-0.0753275	0.0970261	0.50524	ERBIN
Exoc3	0.00347847	0.187357	1	0.058097	0.0549977	0.3931	EXOC3
Exoc5	-0.0016115	0.267877	1	0.0420729	0.258303	0.703315	EXOC5
Exoc6	0.0359054	0.000149481	0.707045	0.0656283	0.0668413	0.430394	EXOC6
Exoc6b	-0.297096	1.02196e-22	3.09469e-18	0.03154	0.408011	0.806969	EXOC6B
Ext1	-0.0937028	5.5698e-06	0.168665	0.104357	0.00986963	0.177041	EXT1
Fam98c	0.0664706	1.95029e-12	5.90587e-08	-0.0242886	0.535496	0.870988	FAM98C
Fat1	0.0281523	0.0425072	1	-0.0526946	0.671632	0.916122	FAT1
Fbrsl1	0.00638815	0.594168	1	-0.00159302	0.971881	0.993238	FBRSL1
Fbxo11	0.0391586	0.00314867	1	0.0276379	0.316374	0.749716	FBXO11
Fbxo33	0.025455	0.0220226	1	0.010155	0.799038	0.951856	FBXO33
Fgf13	-0.124045	0.0910722	1	0.0106263	0.755638	0.940208	FGF13
Fgf14	0.390328	4.39806e-64	1.33182e-59	0.0846382	0.0162167	0.227507	FGF14
Fhit	-0.00284774	0.0722913	1	0.177311	0.106135	0.520339	FHIT
Fmr1	-0.0114925	0.56979	1	0.0276551	0.420027	0.814425	FMR1
Foxg1	0.0626603	4.66651e-06	0.141311	0.0560347	0.157732	0.604675	FOXG1
Foxp1	0.179355	2.29789e-15	6.95847e-11	0.0381936	0.333636	0.76055	FOXP1
Foxp2	0.210141	4.5826e-09	0.00013877	0.030727	0.506854	0.858316	FOXP2
Frg1	0.0328159	0.00483878	1	0.00766796	0.884992	0.973902	FRG1
Frmpd4	0.0964299	2.76843e-09	8.38336e-05	0.0799566	0.0752177	0.453851	FRMPD4
Fubp3	0.0335648	0.0115712	1	0.00690339	0.859908	0.967458	FUBP3
G3bp1	0.00275853	0.64768	1	-0.00218862	0.948499	0.988168	G3BP1
Gabbr2	-0.00451984	0.34418	1	0.0537176	0.0873588	0.483843	GABBR2
Gabra1	0.0241538	0.0523367	1	-0.054539	0.270921	0.714525	GABRA1
Gabra3	0.0375154	0.0956827	1	0.0575609	0.158181	0.604866	GABRA3
Gabra4	0.105177	1.65796e-05	0.431537	0.100712	0.0190715	0.241277	GABRA4
Gabrb2	-0.00127267	0.743459	1	0.161625	0.00262683	0.0815321	GABRB2
Gabrb3	0.168173	2.44997e-21	7.41899e-17	0.120585	0.000293231	0.0187902	GABRB3
Gabrg3	0.218464	4.01804e-25	1.21674e-20	0.106187	0.0202582	0.249123	GABRG3
Galnt13	0.254813	1.99255e-35	6.03383e-31	0.110638	0.0120654	0.194196	GALNT13
Galnt14	0.00129433	0.720779	1	0.0421587	0.361121	0.779481	GALNT14
Galnt2	0.00554312	0.257171	1	0.0460648	0.180701	0.627743	GALNT2
Gatm	-0.309191	2.85717e-33	8.65207e-29	-0.191637	3.19841e-05	0.00424442	GATM
Gbe1	-0.0251952	0.116162	1	-0.0233409	0.704349	0.923579	GBE1
Gda	0.12118	1.56198e-13	4.72998e-09	0.191414	1.11033e-05	0.00209273	GDA
Ggnbp2	0.0151371	0.00386951	1	-0.00229807	0.937715	0.985373	GGNBP2
Gigyf1	0.0450202	2.23187e-05	0.602907	0.0097114	0.785281	0.948432	GIGYF1
Gigyf2	-0.030348	0.292175	1	0.0251373	0.481682	0.847643	GIGYF2
Gnai1	-0.104339	0.0394648	1	0.0501917	0.172045	0.61832	GNAI1
Gnas	0.0460003	0.0372393	1	-0.0572415	0.0766874	0.456775	GNAS
Gnb2	0.202201	4.59752e-30	1.39222e-25	-0.00992703	0.744637	0.935104	GNB2
Gpc5	-0.0296001	0.00174397	1	-0.0835116	0.0433933	0.353261	GPC5
Gpc6	0.059795	0.330327	1	0.125102	0.124955	0.552324	GPC6
Gphn	0.0573313	1.3187e-05	0.399327	0.0528087	0.195705	0.641523	GPHN
Gpr37	-0.128564	7.96001e-21	2.41045e-16	-0.205008	1.05226e-06	0.000456157	GPR37
Gramd4	0.0713966	1.4164e-07	0.00428914	0.106723	0.336978	0.763676	GRAMD4
Grb10	0.0609368	0.000866264	0.656188	0.0387323	0.4082	0.80703	GRB10
Gria1	0.0959478	3.59338e-12	1.08815e-07	0.0904176	0.00522018	0.123206	GRIA1
Gria2	0.356756	1.38037e-76	4.18005e-72	0.105608	0.00026728	0.0182946	GRIA2
Gria3	0.171481	5.14615e-22	1.55836e-17	0.0731934	0.0126953	0.19844	GRIA3
Grid1	0.134467	1.01758e-13	3.08143e-09	0.0591229	0.062413	0.419257	GRID1
Grid2	0.148752	5.18807e-14	1.57105e-09	0.0491551	0.278459	0.720096	GRID2
Grik2	0.161939	1.36441e-15	4.1317e-11	0.0498222	0.13946	0.57757	GRIK2
Grik3	0.0522631	0.0106831	1	0.114275	0.00326903	0.0928247	GRIK3
Grik4	-0.0440477	0.616872	1	-0.0268061	0.58599	0.885213	GRIK4
Grik5	0.140362	3.47181e-14	1.05133e-09	0.0288834	0.437199	0.82488	GRIK5
Grin1	0.187878	6.0725e-16	1.83887e-11	0.0334204	0.313138	0.745543	GRIN1
Grin2a	0.0464804	9.8835e-06	0.236836	0.0479272	0.617544	0.897036	GRIN2A
Grin2b	0.245206	1.21332e-36	3.67416e-32	0.081951	0.409213	0.808007	GRIN2B
Grip1	-0.223304	0.455379	1	0.0903855	0.0532291	0.387161	GRIP1
Grm5	0.373807	1.76136e-54	5.33375e-50	0.112084	0.00837792	0.164394	GRM5
Grm7	0.24083	2.36848e-29	7.17222e-25	0.0885026	0.0113936	0.188278	GRM7
Gtf2i	0.0212817	0.00333485	1	0.017729	0.490525	0.852162	GTF2I
Gucy1a2	0.0185224	0.596496	1	0.263236	0.0021123	0.0717955	GUCY1A2
Hace1	0.0116915	0.608746	1	0.0941649	0.00792108	0.160208	HACE1
Hcn1	-0.129438	4.95544e-17	1.50061e-12	0.0523662	0.223925	0.672452	HCN1
Hdac4	-0.0186583	0.598848	1	0.0203394	0.682618	0.919708	HDAC4
Hdac8	-0.0178206	0.497602	1	-0.0668036	0.328555	0.759537	HDAC8
Hdlbp	0.04662	0.000469922	1	0.0468321	0.131672	0.564031	HDLBP
Hectd4	0.0347613	0.206082	1	0.0279805	0.721445	0.928101	HECTD4
Hecw2	-0.199372	1.25947e-12	3.81394e-08	0.0677714	0.19754	0.643217	HECW2
Herc1	0.0180839	0.109794	1	0.0377413	0.699869	0.922415	HERC1
Herc2	-0.0674995	0.000932633	0.804122	0.0430883	0.602982	0.8902	HERC2
Hivep2	0.0930958	9.65476e-11	2.92365e-06	0.0879179	0.062003	0.417581	HIVEP2
Hivep3	-0.0642026	0.000283157	0.802433	0.0373853	0.556683	0.875765	HIVEP3
Hmgn1	0.0323076	0.00180631	1	0.0426563	0.252206	0.700015	HMGN1
Hnrnpd	0.0500633	0.000158566	0.540892	0.0374181	0.225185	0.673845	HNRNPD
Hnrnpf	0.0177229	0.139153	1	-0.00993654	0.789421	0.949444	HNRNPF
Hnrnph2	0.0155853	0.103702	1	0.0299027	0.310928	0.743722	HNRNPH2
Hnrnpk	0.0971108	8.07071e-08	0.00244397	0.0176973	0.552492	0.875598	HNRNPK
Hnrnpr	0.0497532	0.00020294	0.495155	0.0442589	0.135806	0.571556	HNRNPR
Hnrnpu	-0.0837758	0.00076585	0.603947	0.0335549	0.261102	0.705856	HNRNPU
Hnrnpul2	0.0185793	0.0281053	1	0.0586703	0.0359233	0.325563	HNRNPUL2
Homer1	0.260273	3.91734e-10	1.18625e-05	0.102218	0.00526395	0.123793	HOMER1
Hras	0.0934882	2.31694e-11	7.01615e-07	-0.0523548	0.104874	0.519153	HRAS
Hs3st5	0.158983	1.9459e-15	5.89258e-11	0.0536543	0.411584	0.809412	HS3ST5
Htr1b	0.0617064	5.01081e-07	0.0151737	0.0645775	0.488633	0.851263	HTR1B
Huwe1	-0.00982068	0.455122	1	0.0668546	0.409418	0.808007	HUWE1
Ica1	0.059812	0.00023157	0.577696	0.0375075	0.308153	0.7418	ICA1
Il1rapl1	0.248491	1.36905e-32	4.14576e-28	0.0483492	0.390803	0.799008	IL1RAPL1
Il1rapl2	0.244133	7.11145e-06	0.215349	0.112144	0.173358	0.62076	IL1RAPL2
Ilf2	0.0142857	0.0609475	1	-0.00225814	0.942038	0.986756	ILF2
Immp2l	0.0252486	0.397006	1	0.00393842	0.9651	0.993151	IMMP2L
Ints6	0.0505506	0.000301339	0.646878	0.00122821	0.976091	0.994253	INTS6
Iqsec2	0.0822915	1.7877e-05	0.202516	0.0804004	0.0487592	0.371086	IQSEC2
Itpr1	0.234204	3.01965e-24	9.14411e-20	0.086277	0.0767439	0.456775	ITPR1
Itsn1	0.0397346	0.0167795	1	0.0277427	0.443586	0.826481	ITSN1
Jarid2	-0.11479	2.33384e-06	0.0706732	-0.0318575	0.524748	0.866694	JARID2
Jmjd1c	-0.127641	2.19682e-11	6.65242e-07	0.0737408	0.092953	0.497597	JMJD1C
Kansl1	-0.056233	0.136831	1	-0.00378324	0.915706	0.980247	KANSL1
Kat2b	-0.107475	2.46825e-06	0.0747437	-0.0489582	0.271911	0.716287	KAT2B
Kat6a	-0.0577161	0.173055	1	0.0329916	0.510895	0.860297	KAT6A
Kat6b	0.027661	0.365941	1	0.0555919	0.159015	0.605729	KAT6B
Kcna2	0.0706191	1.00329e-07	0.00303817	-0.00257368	0.954753	0.990278	KCNA2
Kcnb1	0.116948	3.42698e-11	1.03776e-06	0.0574274	0.130541	0.561405	KCNB1
Kcnc1	0.011924	0.237912	1	-0.0936707	0.0319577	0.31067	KCNC1
Kcnc2	-0.449767	0.0026629	1	-0.174263	0.103472	0.516964	KCNC2
Kcnd2	0.294831	2.51674e-38	7.62119e-34	0.0499125	0.293405	0.731484	KCND2
Kcnd3	-0.0192882	0.545888	1	0.101634	0.0284911	0.296725	KCND3
Kcnma1	0.0903577	1.65043e-07	0.00499784	0.0770211	0.135637	0.57134	KCNMA1
Kcnq2	0.176315	1.02868e-21	3.11504e-17	0.0784483	0.0204801	0.250036	KCNQ2
Kcnq3	-0.0631949	0.0741061	1	0.0886437	0.082997	0.474145	KCNQ3
Kdm2a	0.0397452	0.000129795	0.840505	0.0243651	0.559384	0.876583	KDM2A
Kdm3b	-0.00649286	0.251563	1	0.051655	0.130824	0.562251	KDM3B
Kdm4b	0.0358225	0.001949	0.871272	0.0267713	0.494886	0.854579	KDM4B
Kdm4c	-2.58117e-05	0.365268	1	0.0551285	0.184136	0.631788	KDM4C
Kdm5a	0.00474065	0.148284	1	0.0385264	0.388883	0.798043	KDM5A
Kdm5b	0.0758383	4.94975e-06	0.149888	0.0255677	0.529536	0.869582	KDM5B
Kdm5c	0.0301253	0.017347	1	0.05257	0.139831	0.577914	KDM5C
Kdm6a	-0.0903666	0.436121	1	0.0314026	0.468672	0.841649	KDM6A
Kdm6b	0.0627815	1.04431e-06	0.0316239	0.0825961	0.169384	0.61549	KDM6B
Khdrbs2	0.200896	8.79251e-07	0.0266255	0.0876084	0.193372	0.641407	KHDRBS2
D5Ertd579e	0.0847371	2.34532e-06	0.0710209	0.0383747	0.262358	0.705856	KIAA0232
Kif13b	-0.289656	1.00434e-13	3.04133e-09	-0.211283	5.36694e-06	0.00118525	KIF13B
Kif1a	0.0909964	1.12204e-09	3.39775e-05	-0.00698969	0.877468	0.972596	KIF1A
Kif5c	0.105089	3.47212e-10	1.05143e-05	0.00417536	0.909562	0.978642	KIF5C
Kirrel3	0.010493	0.000230677	1	0.0268011	0.461967	0.838694	KIRREL3
Kiz	-0.0309786	0.14973	1	-0.0164337	0.727168	0.929891	KIZ
Klf7	-0.0542236	0.470039	1	0.0447089	0.323367	0.756337	KLF7
Kmt2a	0.0854176	9.00265e-05	0.648207	0.0180399	0.869384	0.970001	KMT2A
Kmt2c	-0.126267	9.63279e-08	0.002917	0.0114816	0.901809	0.977319	KMT2C
Kmt2e	-0.00474647	0.420089	1	0.0525408	0.248525	0.697811	KMT2E
Kmt5b	-0.0547716	0.443615	1	0.0582626	0.0840296	0.47534	KMT5B
Lamb1	0.0478439	0.0020494	0.976126	0.0919584	0.0681746	0.434291	LAMB1
Las1l	0.0852501	3.29808e-07	0.00998725	0.00130322	0.972465	0.993238	LAS1L
Lemd3	0.0814643	2.69327e-08	0.000815576	0.00736891	0.850297	0.965491	LEMD3
Lmtk3	0.166232	2.87136e-27	8.69505e-23	0.0230881	0.501902	0.857194	LMTK3
Lnpk	0.00647134	0.110711	1	0.0713482	0.0859177	0.480194	LNPK
Lrba	-0.00964347	0.740791	1	0.0616404	0.247119	0.696885	LRBA
Lrfn2	0.0376426	0.138115	1	0.142758	0.0518756	0.383319	LRFN2
Lrfn5	0.229017	1.0056e-27	3.04515e-23	0.0865998	0.0148387	0.216343	LRFN5
Lrp1	0.112798	6.57563e-12	1.99123e-07	-0.055531	0.616406	0.896785	LRP1
Lrrc1	0.00220272	0.252824	1	-0.0190343	0.700431	0.922535	LRRC1
Lrrc4	0.0381629	0.0066118	0.855447	0.0456341	0.216543	0.666227	LRRC4
Lrrc4c	0.150351	9.94994e-15	3.01304e-10	0.092568	0.00367647	0.101729	LRRC4C
Lztr1	0.0397204	0.000384702	0.942326	0.0425217	0.152003	0.596017	LZTR1
Macrod2	0.248767	1.51394e-34	4.58452e-30	0.0924787	0.0041819	0.110092	MACROD2
Map1a	0.0641122	1.36221e-07	0.00412504	-0.0178637	0.838797	0.962097	MAP1A
Mapk8ip1	-0.00379896	0.10294	1	-0.0320373	0.245272	0.696207	MAPK8IP1
Mapt	-0.299525	9.39478e-16	2.84493e-11	-0.0313617	0.186276	0.634035	MAPT
Mark1	0.0846706	7.22908e-06	0.218911	0.074995	0.0110761	0.186302	MARK1
Mark2	-0.00753237	0.838863	1	0.0360465	0.216933	0.66637	MARK2
Mast3	-0.0281215	0.000388529	0.903797	0.0595354	0.0726181	0.447051	MAST3
Mbd5	0.046157	0.000615391	1	0.12019	0.0102463	0.179586	MBD5
Mbd6	0.0503587	2.35515e-05	0.503892	-0.0309306	0.51416	0.860903	MBD6
Mcph1	0.00954949	0.071545	1	0.0349388	0.544451	0.873041	MCPH1
Mdga2	0.0884825	8.7246e-06	0.217508	0.00846649	0.861164	0.967863	MDGA2
Mecp2	0.0381863	0.00105424	0.97663	0.0662772	0.12117	0.546838	MECP2
Med12l	0.0397713	0.436169	1	0.0548483	0.279593	0.720614	MED12L
Med13	0.0112697	0.367921	1	-0.00988269	0.846777	0.964467	MED13
Med13l	-0.00413929	0.295607	1	0.0813796	0.0820259	0.471973	MED13L
Med23	0.0527593	0.00010167	0.805235	0.0586099	0.183699	0.631473	MED23
Mef2c	-0.124453	3.3424e-06	0.101214	0.0653414	0.119786	0.54431	MEF2C
Meis2	0.231025	2.08879e-30	6.32526e-26	0.0715414	0.0587971	0.405438	MEIS2
Memo1	0.0291248	0.0440774	1	-0.0261485	0.61415	0.896322	MEMO1
Mib1	0.0587626	0.000709137	0.896227	0.0448164	0.228414	0.675887	MIB1
Mink1	0.0533882	3.07457e-05	0.252584	0.057563	0.0636534	0.422581	MINK1
Mrtfb	0.112375	2.67658e-09	8.10522e-05	0.113111	0.0143474	0.211708	MRTFB
Msantd2	-0.00712542	0.501436	1	-0.0999033	0.225988	0.674997	MSANTD2
Msl2	-0.0166598	0.617064	1	0.0686415	0.0430443	0.353261	MSL2
Msra	0.0214469	0.79771	1	0.0323035	0.40944	0.808007	MSRA
Mtor	0.0174036	0.017757	1	0.0370145	0.434008	0.821892	MTOR
Myh10	0.146773	4.13918e-14	1.25343e-09	0.0588424	0.184088	0.631788	MYH10
Myo16	-0.0486501	0.446082	1	0.024584	0.708006	0.924275	MYO16
Myo5a	0.0534433	0.016665	1	0.0721035	0.158667	0.605615	MYO5A
Myo9b	-0.00561999	0.394559	1	-0.00451	0.911237	0.97928	MYO9B
Myt1l	0.151363	2.05868e-20	6.2341e-16	0.123257	0.00111459	0.0484792	MYT1L
Naa15	0.00689747	0.254036	1	-0.00527118	0.873445	0.971283	NAA15
Naaladl2	-0.257841	7.9111e-15	2.39564e-10	0.037316	0.739348	0.933988	NAALADL2
Nav2	-0.119334	0.000103641	0.602926	-0.0204096	0.700062	0.922422	NAV2
Nav3	-0.101089	0.701605	1	0.0887073	0.149515	0.592277	NAV3
Nbea	0.00447299	0.191232	1	0.0886309	0.261507	0.705856	NBEA
Nckap1	0.0288914	0.350521	1	0.0827046	0.00106781	0.0480274	NCKAP1
Nckap5	-0.072147	0.207355	1	0.173543	0.0931579	0.497635	NCKAP5
Ncoa1	-0.0495036	0.00606951	0.986983	0.085624	0.021222	0.253244	NCOA1
Ncor1	-0.100152	1.42632e-07	0.00431918	0.0894113	0.0205293	0.250036	NCOR1
Ndufa5	0.0716859	5.12176e-07	0.0155097	-0.0348158	0.324789	0.756861	NDUFA5
Ndufs3	0.057731	7.01826e-06	0.212527	-0.0433059	0.158037	0.604675	NDUFS3
Negr1	0.241768	3.43519e-33	1.04024e-28	0.071927	0.0258846	0.280291	NEGR1
Neo1	-0.0656835	0.619203	1	0.01396	0.746187	0.935837	NEO1
Nexmif	0.0742358	3.33163e-06	0.100888	0.0945851	0.122311	0.54824	NEXMIF
Nf1	-0.0755285	0.000978054	1	-0.00883663	0.870285	0.970201	NF1
Nfia	-0.336818	2.12502e-21	6.435e-17	-0.0841706	0.0478526	0.368239	NFIA
Nfib	-0.268035	2.33732e-30	7.07788e-26	-0.0322517	0.593625	0.887349	NFIB
Nfix	-0.157999	3.16949e-11	9.59784e-07	-0.0948063	0.00882387	0.168509	NFIX
Nipa1	-0.0387947	0.663095	1	0.00570363	0.872255	0.971205	NIPA1
Nipa2	0.00777406	0.520949	1	0.0284726	0.436407	0.824084	NIPA2
Nipbl	-0.0838667	0.000119845	0.644149	0.0455728	0.338603	0.763676	NIPBL
Nlgn1	0.272339	7.96578e-29	2.4122e-24	0.0400446	0.284738	0.7234	NLGN1
Nlgn2	0.0756572	1.32008e-05	0.229539	0.0105776	0.737237	0.933206	NLGN2
Nova2	0.058999	1.77921e-06	0.053878	0.011083	0.777321	0.946896	NOVA2
Npas2	0.193308	9.20451e-18	2.78731e-13	0.0720064	0.0357594	0.324984	NPAS2
Nr3c2	-0.0739743	0.000399617	0.738881	0.085076	0.0548696	0.3931	NR3C2
Nrcam	-0.0442605	0.00532606	1	0.103961	0.00788985	0.159948	NRCAM
Nrxn1	0.0181008	4.57469e-06	0.138531	0.0264177	0.549468	0.875058	NRXN1
Nrxn2	0.0852709	3.11734e-05	0.489865	0.0186784	0.530147	0.869582	NRXN2
Nrxn3	0.165702	9.3839e-16	2.84163e-11	0.000229114	0.995659	0.99875	NRXN3
Nsd1	-0.0944947	1.98056e-05	0.491882	0.0260184	0.576904	0.883078	NSD1
Nsd2	0.00767339	0.0775833	1	0.0361031	0.269472	0.713258	NSD2
Ntng1	0.087322	2.62162e-07	0.00793878	-0.130598	0.472448	0.843055	NTNG1
Ntrk2	-0.03108	0.277357	1	0.0698283	0.0688088	0.435878	NTRK2
Ntrk3	0.158672	3.75622e-20	1.13746e-15	0.0678773	0.172075	0.61832	NTRK3
Nup155	0.0191871	0.0152353	1	-0.0251237	0.580018	0.884236	NUP155
Nxf1	0.0136216	0.156523	1	0.0202666	0.636979	0.903822	NXF1
Nxph1	-0.244888	0.000166653	0.657342	-0.0842761	0.0335094	0.3171	NXPH1
Ocrl	0.0739455	0.000452478	0.449692	0.0736467	0.0610098	0.413893	OCRL
Ophn1	-0.0147703	0.00469832	1	0.0391909	0.307817	0.7418	OPHN1
Otud7a	-0.175622	1.81762e-21	5.50412e-17	0.0295526	0.460485	0.8382	OTUD7A
Pabpc1	0.108529	1.8738e-11	5.67424e-07	0.00324347	0.909347	0.978618	PABPC1
Pacs1	0.142478	5.25833e-14	1.59233e-09	0.0862951	0.0318123	0.309902	PACS1
Pacs2	-0.172593	1.4737e-08	0.000446265	-0.122338	0.000360218	0.0216881	PACS2
Pafah1b2	-0.00246687	0.541434	1	0.0184839	0.510257	0.860297	PAFAH1B2
Pak1	-0.3793	1.05187e-20	3.18528e-16	0.0381667	0.289051	0.728403	PAK1
Pak2	-0.0618664	0.295515	1	-0.0147816	0.645775	0.906326	PAK2
Papolg	0.0156482	0.0967796	1	0.0928492	0.0371313	0.329619	PAPOLG
Patj	0.0289636	0.00518094	1	-0.126351	0.516503	0.86154	PATJ
Pbx1	0.0772223	0.000471814	0.812505	0.0829205	0.0304093	0.302813	PBX1
Pcx	0.0180109	0.0144132	1	-0.0519716	0.165428	0.611247	PC
Pcca	-0.0676686	0.288804	1	0.0462115	0.287628	0.726847	PCCA
Pcdh10	0.13187	1.01545e-08	0.000307498	0.0753736	0.078451	0.462038	PCDH10
Pcdh11x	0.060264	0.336953	1	0.0211724	0.729567	0.930084	PCDH11X
Pcdh15	-0.132593	1.54007e-19	4.66364e-15	0.0432727	0.551454	0.875058	PCDH15
Pcdh9	-0.568436	3.15626e-37	9.5578e-33	-0.0214168	0.609988	0.894004	PCDH9
Pcm1	-0.0207408	0.183694	1	0.105489	0.0288212	0.298186	PCM1
Pde1c	0.103317	4.81667e-06	0.145859	0.109638	0.0386852	0.337141	PDE1C
Pde3b	-0.0818789	0.612958	1	7.97963e-06	0.999881	0.999971	PDE3B
Pdzd8	0.0240268	0.0487054	1	0.0611222	0.119891	0.544468	PDZD8
Per1	0.108531	1.97731e-10	5.98768e-06	-0.0259872	0.863334	0.968486	PER1
Per2	0.0264274	0.0435051	1	0.181546	0.103664	0.517725	PER2
Pex7	-0.002912	0.554587	1	-0.00704357	0.858276	0.967458	PEX7
Phf12	0.0327866	0.00448235	0.923099	0.0465808	0.164458	0.610383	PHF12
Phf14	-0.0361427	0.138315	1	0.101516	0.0104149	0.181078	PHF14
Phf21a	-0.0673765	0.00159291	1	0.0577745	0.0971586	0.50524	PHF21A
Phf3	-0.0326937	0.565078	1	0.0649942	0.0823145	0.47292	PHF3
Phf8	0.0140454	0.0495177	1	0.0401974	0.354344	0.773584	PHF8
Phip	-0.0604234	0.00211951	0.8054	0.0748261	0.126233	0.55424	PHIP
Phrf1	0.0116632	0.100477	1	-0.00444443	0.914302	0.980247	PHRF1
Pik3ca	-0.0155084	0.761883	1	-0.0130844	0.699663	0.922415	PIK3CA
Plcb1	0.152838	3.51067e-18	1.0631e-13	0.102593	0.00406028	0.108874	PLCB1
Plxna4	-0.0408491	7.94028e-05	0.645992	0.0933471	0.115843	0.539	PLXNA4
Pogz	0.044856	8.52869e-05	0.802704	0.0618294	0.191766	0.639073	POGZ
Polr3a	0.0144326	0.249042	1	0.0602475	0.172741	0.619469	POLR3A
Pot1a	-0.034527	0.0769296	1	0.0518541	0.300858	0.73658	POT1
Ppfia1	0.0291293	0.0243757	1	-0.0295689	0.409099	0.808007	PPFIA1
Ppm1d	0.0269637	0.0131355	1	-0.0144546	0.812184	0.956707	PPM1D
Ppp1r1b	0.258764	2.47772e-37	7.50302e-33	-0.0268522	0.544277	0.873041	PPP1R1B
Ppp2ca	0.0613974	0.00159301	0.810404	-0.0175395	0.583464	0.884236	PPP2CA
Ppp2r5d	0.0694295	6.27982e-09	0.000190165	0.0419042	0.221259	0.670271	PPP2R5D
Ppp3ca	0.300768	1.80563e-41	5.46782e-37	0.00979112	0.766145	0.943007	PPP3CA
Prex1	-0.0197972	0.611051	1	0.036363	0.278696	0.720274	PREX1
Prickle1	-0.127676	5.4886e-10	1.66206e-05	-0.0574032	0.0945839	0.500747	PRICKLE1
Prickle2	-0.493544	1.22322e-41	3.70416e-37	0.0838159	0.0867933	0.48299	PRICKLE2
Prkar1b	0.0551655	1.01465e-06	0.0307257	0.0444752	0.0931974	0.497635	PRKAR1B
Prkca	-0.138087	3.34906e-07	0.0101416	0.138794	0.00183847	0.0665995	PRKCA
Prkcb	0.206982	9.60205e-21	2.90769e-16	0.0944695	0.0211082	0.252309	PRKCB
Prkd1	0.0903163	3.81257e-06	0.115452	0.008909	0.872809	0.971283	PRKD1
Prkdc	-0.026747	0.733773	1	-0.0237427	0.725374	0.929575	PRKDC
Prkn	-0.154256	2.05765e-09	6.23099e-05	0.0386389	0.689843	0.920218	PRKN
Prpf39	-0.00211383	0.136895	1	-0.0820353	0.13589	0.571556	PRPF39
Prpf8	0.0430589	7.59817e-05	0.525196	0.0221014	0.613889	0.896322	PRPF8
Prr14l	-0.0368627	0.493114	1	0.0650901	0.171412	0.617797	PRR14L
Psd3	-0.0318738	0.102492	1	0.12795	0.00410249	0.109756	PSD3
Psmd11	0.0203048	0.0701208	1	-0.00225614	0.94268	0.986756	PSMD11
Ptbp2	-0.0357506	0.0655637	1	0.0658978	0.0634722	0.422444	PTBP2
Ptchd1	0.0311879	0.0553731	1	0.128717	0.108054	0.523537	PTCHD1
Gm15155	0.281036	1.28718e-20	3.89784e-16	-0.219301	0.426721		PTCHD1-AS
Ptdss1	0.0091814	0.0980332	1	-0.0175066	0.577561	0.883272	PTDSS1
Pten	-0.0210775	0.213729	1	0.0923602	0.0102081	0.179429	PTEN
Ptpn11	-0.0225253	0.409202	1	-0.0034987	0.910643	0.978995	PTPN11
Ptpn4	-0.107697	2.18813e-08	0.000662609	-0.017663	0.830053	0.960159	PTPN4
Ptprt	-0.101261	0.0024536	1	0.121989	0.030121	0.301959	PTPRT
Pxdn	0.095651	2.76627e-08	0.000837681	0.0680581	0.102711	0.515536	PXDN
Qrich1	0.0323098	0.00832588	1	0.00606483	0.853784	0.966696	QRICH1
Rab2a	-0.0110517	0.431186	1	0.0197452	0.489097	0.851354	RAB2A
Rac1	0.00481994	0.464043	1	-0.0303908	0.276155	0.717704	RAC1
Rai1	0.0623959	2.5176e-05	0.26265	0.024486	0.574026	0.882901	RAI1
Rala	-0.00182684	0.48335	1	0.0104625	0.78075	0.947991	RALA
Ralgapb	-0.0108622	0.302695	1	0.0735309	0.0586813	0.40535	RALGAPB
Ranbp17	-0.0180739	0.655455	1	-0.00611823	0.926563	0.982587	RANBP17
Rapgef4	-0.000548256	0.442073	1	-0.0445597	0.153896	0.599228	RAPGEF4
Rbfox1	0.209205	5.67441e-20	1.71833e-15	0.069974	0.0703551	0.44081	RBFOX1
Rbm27	-0.00181136	0.19321	1	0.0629018	0.123522	0.550895	RBM27
Reep3	-0.0123146	0.741677	1	-0.090379	0.00848844	0.164764	REEP3
Reln	0.141323	8.48472e-14	2.56934e-09	0.0359278	0.764989	0.94266	RELN
Rere	-0.0915635	9.41566e-05	0.592029	0.0105329	0.828369	0.960159	RERE
Rfx3	0.101915	0.00165073	0.940309	0.152159	0.00661856	0.145396	RFX3
Rfx7	-0.0350411	0.0237826	1	-0.0113588	0.82061	0.958119	RFX7
Rgs7	0.0298959	0.014636	1	0.0512121	0.16629	0.611564	RGS7
Rheb	0.0683052	3.40505e-05	0.654584	0.0182351	0.669592	0.916122	RHEB
Rims1	-0.0242065	0.37472	1	0.0408179	0.349358	0.772017	RIMS1
Rims2	0.18853	7.81719e-27	2.3672e-22	0.0392808	0.317111	0.751	RIMS2
Rit2	0.146045	1.453e-10	4.39999e-06	-0.0227718	0.587384	0.886011	RIT2
Rnf25	-0.0101926	0.688903	1	-0.0388447	0.403043	0.805669	RNF25
Rnf38	-0.0097499	0.435853	1	-0.015973	0.736056	0.932483	RNF38
Robo2	0.149055	4.12424e-15	1.2489e-10	0.0809059	0.0294634	0.299175	ROBO2
Rora	0.0857056	1.59236e-10	4.822e-06	-0.0782434	0.411283	0.809367	RORA
Rpl10	0.0558162	3.20028e-05	0.417415	-0.0320852	0.21954	0.668059	RPL10
Rpl34	0.0559767	8.18305e-07	0.0247799	-0.0131562	0.716986	0.926776	RPL34
Rps6ka2	0.105368	5.34297e-08	0.00161796	0.142173	0.000256108	0.0181015	RPS6KA2
Rps6ka3	0.0717767	0.0150332	1	0.0793997	0.0698767	0.440019	RPS6KA3
Rsrc1	-0.0911336	0.0515112	1	-0.0181856	0.657362	0.911425	RSRC1
Runx1t1	0.0553827	0.249613	1	0.0864395	0.0727422	0.447051	RUNX1T1
Sae1	0.00733818	0.246369	1	0.0173734	0.576352	0.883078	SAE1
Sash1	-0.0149113	0.257877	1	-0.0889636	0.0354596	0.324527	SASH1
Sbf1	-0.103537	0.545867	1	0.0165449	0.598652	0.888517	SBF1
Scaf4	0.0143928	0.0300356	1	-0.0133804	0.782336	0.948297	SCAF4
Scfd2	-0.0366221	0.360773	1	-0.0176144	0.717776	0.926982	SCFD2
Scn1a	0.0354475	0.223886	1	-0.0647592	0.213427	0.663704	SCN1A
Scn2a	0.14915	1.64035e-14	4.96729e-10	0.0948985	0.0262163	0.281389	SCN2A
Scn8a	0.0902619	0.000353892	0.612678	0.0292786	0.492991	0.85386	SCN8A
Scn9a	0.0507463	0.0129539	1	-0.00474646	0.963886	0.992869	SCN9A
Sdc2	0.0952602	3.26612e-08	0.000989048	0.0722883	0.0342187	0.319236	SDC2
Senp1	-0.00212261	0.553716	1	-0.0294148	0.557845	0.876583	SENP1
Set	0.0482211	0.00037197	0.838906	-0.0113096	0.725433	0.929575	SET
Setbp1	-0.137082	4.50809e-16	1.36514e-11	0.194206	5.35386e-05	0.00632972	SETBP1
Setd1a	0.0461175	9.82783e-06	0.297606	0.0162326	0.678909	0.918944	SETD1A
Setd2	0.0141337	0.0766665	1	0.0352262	0.381511	0.793903	SETD2
Setd5	-0.0564621	0.00257061	1	0.0584195	0.122423	0.548436	SETD5
Setdb1	0.067384	5.80577e-08	0.0017581	0.033371	0.424419	0.817197	SETDB1
Sez6l2	-0.0604645	0.527539	1	-0.0682772	0.146993	0.589105	SEZ6L2
Sf3b1	0.035481	0.316905	1	0.0349254	0.284545	0.7234	SF3B1
Sgsm3	0.0349383	0.00974743	1	0.00782748	0.826475	0.960044	SGSM3
Sh3rf1	-0.00142382	0.793247	1	0.178249	0.00131249	0.0540157	SH3RF1
Sh3rf3	-0.0930201	9.2019e-06	0.242928	0.0865616	0.120871	0.546173	SH3RF3
Shank1	0.0155226	0.316996	1	0.0321654	0.437935	0.825054	SHANK1
Shank2	0.0804104	2.53575e-05	0.358019	0.127631	0.0100151	0.178017	SHANK2
Shank3	0.109723	1.66256e-10	5.03455e-06	0.0282493	0.495542	0.854614	SHANK3
Sin3a	0.0173383	0.0687608	1	0.0447695	0.209342	0.65744	SIN3A
Sin3b	0.0205595	0.0191275	1	0.0303928	0.341981	0.766663	SIN3B
Ski	0.0967354	1.44675e-11	4.38106e-07	0.0380258	0.33055	0.760146	SKI
Slc12a5	0.2201	9.90588e-31	2.9997e-26	0.0162393	0.613271	0.896137	SLC12A5
Slc1a1	0.0657642	9.0461e-05	0.75674	0.0681324	0.020985	0.25153	SLC1A1
Slc1a2	0.205119	0.000127027	0.966355	0.0382719	0.623332	0.8989	SLC1A2
Slc24a2	-0.627412	2.47079e-44	7.48204e-40	0.0134251	0.798586	0.951739	SLC24A2
Slc25a12	-0.00819959	0.22399	1	0.0384909	0.215647	0.665834	SLC25A12
Slc25a27	-0.0355721	0.548737	1	0.0242015	0.534084	0.87083	SLC25A27
Slc35b1	0.0382353	0.00181495	1	0.0126594	0.74334	0.935034	SLC35B1
Slc45a1	0.042036	0.000832977	0.807831	-0.00701918	0.843388	0.963481	SLC45A1
Slc4a10	0.0287583	0.337916	1	0.103566	0.00356812	0.0993649	SLC4A10
Slc6a1	0.0913734	4.95423e-09	0.000150024	-0.0572245	0.109468	0.526297	SLC6A1
Slc9a6	0.0228132	0.0335858	1	0.0546987	0.0987514	0.509756	SLC9A6
Slc9a9	-0.196789	3.25682e-11	9.86229e-07	0.0246266	0.656332	0.91107	SLC9A9
Slitrk5	0.0423766	0.000803565	0.830467	0.0810995	0.0222735	0.259083	SLITRK5
Smad4	-0.00233801	0.105878	1	0.0448148	0.278307	0.720077	SMAD4
Smarca2	-0.0267497	0.390377	1	0.0749542	0.0121544	0.195087	SMARCA2
Smarca4	0.0514026	0.000954688	1	0.0105027	0.744992	0.935104	SMARCA4
Smarcc2	0.0444113	0.000222552	0.493599	0.00619652	0.829741	0.960159	SMARCC2
Smc3	-0.0239411	0.750045	1	0.0438926	0.202261	0.65125	SMC3
Smg6	-0.086335	0.00133653	1	0.0362571	0.356711	0.775961	SMG6
Smurf1	0.0382328	0.000832647	1	0.0326365	0.354411	0.7736	SMURF1
Snap25	0.0824365	0.000111796	0.625914	0.0219895	0.479466	0.846058	SNAP25
Snd1	-0.0100684	0.272308	1	0.0305068	0.323744	0.756352	SND1
Sntg2	0.0404854	0.000656829	1	-0.00416776	0.965623	0.993238	SNTG2
Snx14	0.0542432	0.000344182	0.59179	0.0257367	0.456879	0.835683	SNX14
Sod1	0.0749826	4.541e-08	0.00137511	-0.0359416	0.269307	0.713258	SOD1
Son	0.0339495	0.00374105	1	0.0154278	0.642678	0.905181	SON
Sorcs1	-0.11138	0.0015979	0.898258	0.101524	0.0255229	0.277664	SORCS1
Sorcs3	-0.0217915	0.00404733	1	0.0992206	0.0300953	0.301959	SORCS3
Sos2	-0.00794171	0.24478	1	0.0123218	0.722322	0.928424	SOS2
Sox5	-0.169037	7.48593e-12	2.26689e-07	0.0362347	0.457242	0.835876	SOX5
Sox6	-0.190306	0.01411	0.95211	-0.0187532	0.697398	0.922415	SOX6
Sparcl1	0.0140594	0.698405	1	-0.106321	0.0018142	0.0663647	SPARCL1
Spast	-0.0413404	0.0785951	1	0.059341	0.0962901	0.503455	SPAST
Spen	0.0293887	0.000226401	0.613552	0.0594474	0.259796	0.70506	SPEN
Spry2	0.0686998	1.03468e-06	0.0313323	0.0353422	0.305035	0.739703	SPRY2
Sptbn1	0.0379691	0.00146615	1	0.0385605	0.329142	0.75976	SPTBN1
Srcap	0.0294582	0.0132502	1	0.0738514	0.101809	0.514983	SRCAP
Srgap3	-0.0423174	0.00809664	1	0.0707231	0.0939864	0.499303	SRGAP3
Srpr	0.0585233	4.59486e-07	0.0139142	0.0399359	0.279627	0.720614	SRPRA
Srrm2	0.111479	2.879e-14	8.71819e-10	0.000667706	0.993034	0.998253	SRRM2
Srsf11	-0.0262441	0.0339025	1	0.00476918	0.90517	0.97771	SRSF11
St7	0.0282373	0.0162108	1	0.0153711	0.798986	0.951856	ST7
Stag1	0.069156	2.02923e-05	0.329735	0.0808406	0.0360633	0.325745	STAG1
Stk39	-0.109973	0.0108645	1	-0.0817842	0.0207929	0.251078	STK39
Stxbp1	0.138234	4.75486e-15	1.43987e-10	0.0139972	0.5828	0.884236	STXBP1
Stxbp5	-0.055663	9.07028e-05	0.698683	0.0963623	0.015652	0.223312	STXBP5
Supt16	0.0124914	0.0723046	1	0.0449926	0.148842	0.592277	SUPT16H
Sybu	-0.0184975	0.0889008	1	0.0269825	0.502551	0.857194	SYBU
Syn1	0.0853223	0.000171105	0.414315	0.0678444	0.0182295	0.238046	SYN1
Syn2	0.0377625	0.355902	1	0.0965374	0.00181667	0.0663647	SYN2
Syncrip	0.00648296	0.609772	1	0.0449828	0.16113	0.607355	SYNCRIP
Syne1	0.144825	1.01867e-16	3.08475e-12	0.0939209	0.280215	0.720689	SYNE1
Syngap1	0.111333	8.50232e-13	2.57467e-08	0.0825512	0.0271542	0.288278	SYNGAP1
Synj1	0.042657	0.0138076	1	0.103431	0.00507263	0.122433	SYNJ1
Syp	0.0652427	1.7375e-05	0.366327	0.00762322	0.801797	0.953074	SYP
Syt1	0.148492	2.14385e-15	6.492e-11	0.05547	0.053183	0.387161	SYT1
Taf1	0.0256782	0.150095	1	0.043075	0.257253	0.702676	TAF1
Taf4	0.0332777	0.00365736	1	0.0050731	0.913351	0.980044	TAF4
Tanc2	-0.0610905	0.605954	1	0.0598414	0.274726	0.717096	TANC2
Taok1	0.0202493	0.00712569	1	0.0445725	0.350655	0.772017	TAOK1
Tbc1d23	0.00160187	0.206089	1	0.0327467	0.375479	0.791076	TBC1D23
Tbc1d5	-0.40771	6.03661e-34	1.82801e-29	-0.0119297	0.779128	0.947011	TBC1D5
Tbcel	-0.000330395	0.430778	1	-0.00187023	0.956408	0.99064	TBCEL
Tbck	-0.0174016	0.482859	1	0.0571904	0.232642	0.682189	TBCK
Tbl1x	0.011837	0.0359681	1	0.0448672	0.196166	0.641623	TBL1X
Tbl1xr1	-0.0502973	0.705047	1	-0.0328327	0.357864	0.776576	TBL1XR1
Tcf20	0.00548147	0.531955	1	0.0968016	0.0216902	0.25675	TCF20
Tcf4	-0.524942	8.70369e-54	2.63565e-49	-0.0402203	0.349978	0.772017	TCF4
Tet2	0.0227868	0.11258	1	0.0491924	0.338327	0.763676	TET2
Tet3	0.0166464	0.0019345	1	0.0111351	0.817071	0.957472	TET3
Thra	0.0295578	0.00199721	0.796854	0.0397969	0.190046	0.636507	THRA
Tlk2	0.0145458	0.113102	1	0.020202	0.542175	0.873041	TLK2
Tm9sf4	0.0601234	6.21492e-05	0.556856	0.00442038	0.894441	0.97684	TM9SF4
Tnpo3	-0.00703374	0.379471	1	0.0256238	0.449369	0.830237	TNPO3
Tnrc6b	-0.0433279	0.0180461	1	0.029789	0.59381	0.887387	TNRC6B
Tnrc6c	-0.0572802	0.0103928	1	0.0516297	0.182216	0.62991	TNRC6C
Top2b	-0.0396282	0.697317	1	0.0690788	0.0292686	0.299175	TOP2B
Top3b	-0.00330553	0.493981	1	0.00181622	0.966941	0.993238	TOP3B
Trappc6b	0.0227926	0.266539	1	0.0194913	0.560828	0.87766	TRAPPC6B
Trappc9	0.000356406	0.572922	1	0.0198142	0.574767	0.882901	TRAPPC9
Trim23	-0.00188767	0.1286	1	0.0878572	0.0134116	0.206167	TRIM23
Trim33	-0.0126248	0.517433	1	0.0397065	0.297692	0.734069	TRIM33
Trio	-0.0150841	0.362394	1	0.0808017	0.0640414	0.423521	TRIO
Trip12	-0.0784898	3.12554e-05	0.6317	0.0782763	0.0836848	0.474616	TRIP12
Trpc6	-0.031255	0.277162	1	0.0876126	0.347841	0.770794	TRPC6
Trrap	0.101632	4.09468e-10	1.23995e-05	0.0432929	0.583216	0.884236	TRRAP
Tsc1	0.0532632	2.209e-05	0.326529	0.0496922	0.211205	0.659477	TSC1
Tshz1	0.0197703	0.0762405	1	0.117015	0.00760416	0.156215	TSHZ1
Tspan7	0.0783578	0.000818095	1	0.0251792	0.365631	0.783037	TSPAN7
Tspoap1	0.21341	1.34211e-27	4.06418e-23	0.0354723	0.473695	0.843544	TSPOAP1
Tubgcp5	0.0105969	0.0164536	1	0.0771598	0.0547451	0.392838	TUBGCP5
Ube2h	-0.022569	0.657512	1	-0.0175104	0.530761	0.869582	UBE2H
Ube3a	-0.00102318	0.678031	1	0.0486651	0.260208	0.705428	UBE3A
Ube3c	-0.00993994	0.321325	1	0.0736943	0.0168348	0.230389	UBE3C
Ubn2	-0.0803976	7.99841e-06	0.242208	0.0476135	0.38917	0.798049	UBN2
Ubr1	-0.00720718	0.144778	1	0.0832584	0.0687003	0.435616	UBR1
Ubr5	0.0664831	0.000839332	1	0.0150567	0.752612	0.9386	UBR5
Uimc1	0.00592709	0.27218	1	-0.141348	0.0279272	0.293371	UIMC1
Unc13a	0.168229	5.38254e-19	1.62994e-14	0.0386993	0.27005	0.713822	UNC13A
Unc5d	-0.00898866	0.000123308	0.733312	0.153139	0.169668	0.616179	UNC5D
Unc79	0.190177	1.68171e-23	5.09257e-19	0.102768	0.0292906	0.299175	UNC79
Unc80	0.0736075	0.00145097	1	0.0585744	0.482213	0.847873	UNC80
Upf2	0.00911021	0.0979296	1	0.00552719	0.891433	0.975028	UPF2
Upf3b	-0.000342508	0.530214	1	-0.00990995	0.814403	0.956756	UPF3B
Usp15	-0.0028388	0.195746	1	0.0884011	0.00415674	0.109779	USP15
Usp45	0.0245407	0.0381231	1	0.0527412	0.155484	0.601092	USP45
Usp7	0.0482451	0.000367913	0.953876	0.0475519	0.0941073	0.499674	USP7
Usp9x	0.0150871	0.660767	1	0.116562	0.186939	0.63493	USP9X
Vamp2	0.0473462	3.86016e-06	0.116893	0.0293929	0.237908	0.688044	VAMP2
Vps13b	-0.050561	0.0521371	1	0.0387097	0.532874	0.870825	VPS13B
Wac	-0.0807014	0.00116775	1	0.0518121	0.166942	0.611954	WAC
Wasf1	0.083008	0.0153164	0.867073	0.11522	0.000979329	0.0455536	WASF1
Wdfy3	-0.0930377	8.7417e-05	0.700047	0.0527278	0.514489	0.860903	WDFY3
Wdr26	-0.024511	0.297246	1	0.0581542	0.0661321	0.428686	WDR26
Wnk3	0.0173346	0.35796	1	0.123446	0.0140328	0.209383	WNK3
Wwox	-0.128693	1.93906e-05	0.456684	0.0116337	0.819333	0.957889	WWOX
Wwp1	-0.0231655	0.529257	1	0.0200516	0.632826	0.902577	WWP1
Xpo1	0.0283032	0.03913	1	0.0814236	0.0484889	0.370504	XPO1
Xrcc6	-0.0676237	0.271786	1	-0.0308953	0.570656	0.881924	XRCC6
Yeats2	-0.00836707	0.413599	1	0.035579	0.52561	0.867359	YEATS2
Ythdc2	0.00519869	0.0601054	1	0.0249887	0.535163	0.870988	YTHDC2
Ywhae	0.0848453	8.18446e-09	0.000247842	0.00777099	0.761679	0.941272	YWHAE
Ywhag	0.024282	0.024749	1	0.0381733	0.163937	0.610222	YWHAG
Ywhaz	0.108174	2.04592e-08	0.000619545	0.0448844	0.106901	0.521447	YWHAZ
Yy1	-0.00427353	0.624001	1	0.0277955	0.432793	0.821523	YY1
Zbtb16	-0.169371	8.3299e-12	2.52246e-07	0.363824	0.0152591	0.220005	ZBTB16
Zbtb20	-0.00106457	0.556316	1	0.028774	0.839815	0.962559	ZBTB20
Zbtb7a	0.0544813	6.40194e-06	0.193863	0.0316742	0.315474	0.748527	ZBTB7A
Zmiz1	0.00125511	0.655543	1	0.0190052	0.644314	0.905729	ZMIZ1
Zmym2	-0.0256318	0.420776	1	0.0244148	0.457837	0.836261	ZMYM2
Zmynd11	0.0164081	0.733927	1	0.0626432	0.0261306	0.281389	ZMYND11
Zmynd8	-0.0189765	0.771358	1	0.0550025	0.0975316	0.506347	ZMYND8
Zfp292	-0.0201289	0.519535	1	0.104729	0.0432122	0.353261	ZNF292
Zfp385b	0.125664	3.50968e-11	1.0628e-06	0.0422827	0.306661	0.741339	ZNF385B
Zfp462	-0.0108619	0.0235624	1	0.0495077	0.293181	0.731484	ZNF462
Zfp804a	0.0620168	0.404517	1	0.0179582	0.744314	0.935034	ZNF804A
Zfp827	-0.00288863	0.167626	1	0.0258417	0.458342	0.836425	ZNF827
Zswim6	0.116559	5.43906e-05	0.240576	-0.0108973	0.76666	0.943007	ZSWIM6
Apod	-0.68646	9.61361e-57	2.91119e-52	-0.237064	2.3604e-09	1.38377e-05
Mbp	-0.90523	2.94637e-60	8.92219e-56	-0.230312	5.32014e-09	1.38377e-05
Car2	-0.185835	1.85474e-16	5.61654e-12	-0.211887	8.94834e-09	1.66247e-05
Septin4	-0.209997	5.89714e-18	1.78577e-13	-0.220832	1.06166e-08	1.71047e-05
Mog	-0.408134	7.18561e-46	2.17595e-41	-0.227936	6.30192e-08	6.30435e-05
Trf	-0.571657	4.37893e-50	1.32603e-45	-0.246906	7.99885e-08	6.935e-05
Plp1	-0.812206	1.12035e-57	3.39264e-53	-0.219246	9.02914e-08	7.339e-05
Thrb	0.0317739	0.129229	1	0.207957	1.71976e-07	0.000115834
Lgi3	-0.0922415	2.74382e-06	0.0830883	-0.164446	1.9093e-07	0.00011824
Gna12	-0.142183	2.77971e-11	8.41753e-07	-0.162668	8.75547e-07	0.000422014
Garem1	0.0521791	0.00463001	1	0.221215	8.96419e-07	0.000422014
Mag	-0.392306	1.53714e-36	4.65477e-32	-0.212736	1.04386e-06	0.000456157
Enpp2	-0.594777	1.91852e-53	5.80966e-49	-0.182752	1.14583e-06	0.000457638
Cnp	-0.0638658	0.000794929	0.999363	-0.196125	2.24913e-06	0.000769736
Atp1b3	-0.0360811	0.801151	1	-0.144894	2.75777e-06	0.000853923
Plekhh1	-0.208957	5.1537e-22	1.56064e-17	-0.238204	3.22783e-06	0.000942867
Lin7a	0.0978045	8.76982e-07	0.0265568	0.268606	3.33501e-06	0.000942867
Ninj2	-0.181392	3.98418e-23	1.20649e-18	-0.47919	3.63932e-06	0.000986028
St6gal2	0.0128355	0.0976419	1	0.171425	3.91497e-06	0.00103906
Prr5l	-0.644879	4.61508e-60	1.39754e-55	-0.241907	4.22261e-06	0.0010983
Desi1	-0.102833	0.0067452	0.880566	-0.138391	4.40206e-06	0.0011005
Sox2ot	-0.418364	2.24656e-33	6.80302e-29	-0.191456	4.59566e-06	0.0011005
Cldn11	-0.339303	1.30493e-35	3.95158e-31	-0.193388	5.46826e-06	0.00118525
Rgl1	0.107187	6.9599e-10	2.1076e-05	0.152051	6.68595e-06	0.00142542
Rnf150	0.0170446	0.712412	1	0.19132	6.95869e-06	0.00145964
Cobl	-0.0600729	0.0528902	1	0.183281	9.59859e-06	0.00186313
Napb	0.0401917	0.00208055	1	0.117768	1.41803e-05	0.00256132
Faxc	0.0334867	0.0277896	1	0.208686	1.47503e-05	0.00259226
Fgfr2	-0.225197	9.30187e-12	2.81679e-07	-0.197426	1.51034e-05	0.00261893
Plxnc1	0.0349709	0.0202687	1	0.22126	1.82364e-05	0.00296456
Stxbp5l	0.149107	4.98896e-15	1.51076e-10	0.278224	1.91035e-05	0.00302977
Man1a	0.0249624	3.15382e-06	0.0955039	0.1645	1.95722e-05	0.00306626
Rab40b	0.100103	3.21304e-12	9.72973e-08	0.145082	2.12871e-05	0.00320209
Sv2b	0.0380206	0.604342	1	0.214224	2.58955e-05	0.0037419
Srr	-0.0226834	0.57132	1	0.137953	2.88084e-05	0.00403465
Samd12	0.0696305	1.80122e-05	0.495809	0.200415	2.88522e-05	0.00403465
Mobp	-0.533582	1.56308e-54	4.73331e-50	-0.176476	3.0321e-05	0.00418613
Ybx3	0.0268109	0.0189846	1	-0.170981	3.64358e-05	0.00473847
Pde1a	0.145158	0.000146229	0.661621	0.232245	3.75851e-05	0.0047921
Sytl2	-0.244416	4.8496e-24	1.46856e-19	-0.169521	4.62594e-05	0.00562246
Cd9	-0.0999436	3.51426e-07	0.0106419	-0.137169	4.75755e-05	0.00572888
Map2k1	0.093263	2.41646e-11	7.31753e-07	0.123031	4.81423e-05	0.00574395
Fa2h	-0.209231	9.43505e-29	2.85712e-24	-0.202147	5.52538e-05	0.00647365
Prkar2b	0.130616	2.89467e-12	8.76564e-08	0.127837	6.16939e-05	0.00712892
Klf12	-0.153785	7.35375e-14	2.22686e-09	0.189725	6.57625e-05	0.00737277
Sgip1	0.060933	0.00223158	1	0.118311	6.93316e-05	0.00751382
Crym	0.0930303	7.16414e-13	2.16944e-08	0.207	7.01913e-05	0.00754411
Gas7	-0.132552	0.184701	1	0.162118	7.15099e-05	0.00762283
Gabra5	0.0439418	0.00102539	1	0.157668	7.63019e-05	0.00800247
Sirt2	-0.0261042	0.494291	1	-0.112734	7.84625e-05	0.00816324
Fnbp1	-0.53128	1.45038e-35	4.39205e-31	-0.128704	7.97661e-05	0.008233
Scd2	-0.250684	1.2146e-08	0.000367805	-0.104441	8.30831e-05	0.0083409
Enox1	-0.064069	0.142146	1	0.169106	8.33981e-05	0.0083409
Cap2	0.0700152	0.00353346	1	0.103209	8.46596e-05	0.0083409
Slc39a10	0.0307231	0.042855	1	0.137763	8.54301e-05	0.00835353
Ptk2b	0.243746	1.09579e-32	3.31827e-28	0.122363	8.74476e-05	0.00842411
Btbd10	-0.0104102	0.668673	1	0.146547	9.9166e-05	0.00941353
Erc2	0.120741	2.41599e-13	7.3161e-09	0.152464	0.000108818	0.0101084
Ptpre	-0.00383845	0.541627	1	0.154841	0.000110779	0.0102176
Slc24a4	0.113331	1.2678e-10	3.83916e-06	0.225325	0.000120647	0.0108208
Hs6st2	0.115677	1.60011e-06	0.0484547	0.131269	0.00012307	0.0109625
Cntn2	-0.157981	5.41218e-14	1.63892e-09	-0.167943	0.000130127	0.0114741
Zfp385a	0.0448364	0.000246902	1	-0.133394	0.000130578	0.0114741
Pcdh17	0.111598	0.00111202	1	0.182111	0.000137404	0.0119929
Elovl7	-0.150306	2.52097e-13	7.634e-09	-0.188503	0.000149454	0.0129576
Sec11c	-0.0729119	0.00162808	1	-0.155659	0.000153879	0.013253
Serpini1	0.0126042	0.00265283	1	0.163768	0.000157761	0.0134401
Hcn2	-0.0392535	0.165343	1	-0.161311	0.000158119	0.0134401
Rapgef2	-0.0832014	1.38957e-08	0.00042079	0.149034	0.000168107	0.0141047
Pls1	-0.0837087	0.175593	1	-0.205652	0.000173461	0.0143686
Opalin	-0.224391	3.64052e-22	1.10242e-17	-0.210773	0.000176172	0.0144314
Ak5	0.0898047	1.36142e-06	0.0412266	0.201489	0.000176439	0.0144314
Gjc3	-0.32185	6.1051e-37	1.84875e-32	-0.163317	0.000184476	0.0147185
Kcnq5	0.342621	6.75792e-37	2.04643e-32	0.146208	0.000209204	0.0162916
Cdh12	-0.00132198	0.358562	1	0.267432	0.00022806	0.0172022
Phldb1	-0.241459	2.55997e-23	7.75209e-19	-0.146902	0.000228833	0.0172022
Mpped1	-0.00299631	0.663791	1	0.158394	0.000239793	0.0175398
Erc1	-0.0354887	0.0184373	1	0.168166	0.000242787	0.0175398
Tiam2	0.178308	1.2756e-20	3.86276e-16	0.109731	0.00024373	0.0175398
Tmem132b	0.0362445	0.0588402	1	0.125349	0.000244114	0.0175398
Aspa	-0.336628	3.4768e-37	1.05284e-32	-0.182152	0.000255978	0.0181015
Lamp1	-0.117648	0.000813248	0.981324	-0.0937529	0.000260287	0.0181355
Akap5	0.0304601	0.00494942	1	0.166071	0.000260634	0.0181355
Ubxn2b	0.0385841	0.00621793	1	0.130317	0.000262167	0.0181355
Fth1	-0.131151	0.611949	1	-0.137228	0.000263986	0.0181647
Scn1b	0.0465995	0.000126254	0.70969	-0.126309	0.000277224	0.0184569
Nell2	0.105965	0.000408368	0.874326	0.119147	0.000280536	0.0185196
Ugt8a	-0.425209	2.2322e-43	6.75955e-39	-0.18092	0.000288079	0.0187323
Cerk	-0.048755	0.0124827	1	-0.135368	0.000293303	0.0187902
Sema6a	-0.145862	1.28577e-10	3.89358e-06	-0.157468	0.000296642	0.0188187
Efnb2	0.0707877	1.82227e-06	0.055182	0.133662	0.000308643	0.019485
Slc44a1	-0.281987	2.69175e-15	8.15117e-11	-0.131096	0.000313252	0.0196804
Gab1	-0.381267	6.88679e-39	2.08546e-34	-0.171828	0.000321087	0.0200757
Cacng3	0.0791218	1.0744e-07	0.0032535	0.107638	0.000344723	0.0213482
Pgm2l1	0.057006	0.000252201	0.625581	0.179683	0.000350475	0.0213987
Rnf13	-0.254751	1.30123e-11	3.94039e-07	-0.127803	0.000352495	0.0214215
Plk2	0.193308	1.53093e-20	4.63596e-16	0.122718	0.000359289	0.0216881
Stxbp3	-0.104465	3.74207e-05	0.50079	-0.146953	0.000368925	0.02211
Lrrtm3	0.0322155	0.0391089	1	0.154529	0.000408985	0.0241766
Akt3	0.00582326	0.27259	1	0.103959	0.00042629	0.0248605
Scn3b	0.0635662	5.72694e-05	0.373105	0.148104	0.000451337	0.0262037
Myo1d	-0.224648	5.0666e-09	0.000153427	-0.162424	0.000461251	0.0264993
Tmcc3	-0.146516	2.29854e-05	0.516836	-0.135958	0.000462541	0.0264993
Nol4	-0.0700999	1.67731e-06	0.0507924	0.122233	0.000475436	0.0271186
Kctd16	0.111418	5.22561e-12	1.58242e-07	0.21884	0.000486759	0.0276433
Mtpn	0.0302464	0.00664982	0.916642	0.0988525	0.000510812	0.0287715
Rabgap1l	-0.0178754	0.850935	1	0.116245	0.000511051	0.0287715
Rpl28	0.0940106	1.01659e-10	3.07844e-06	-0.0954115	0.000517397	0.0290032
Sorbs2	0.110788	1.16719e-10	3.53448e-06	0.124014	0.000536671	0.0296996
Caln1	0.244764	2.11219e-28	6.39613e-24	0.141085	0.00055343	0.0303686
Anln	-0.374231	2.88059e-40	8.72302e-36	-0.202561	0.00056052	0.0306284
Ppp1r12b	0.0121832	0.0875599	1	0.149104	0.000586527	0.0315198
Pde8a	-0.315629	1.37155e-32	4.15332e-28	-0.162058	0.000601294	0.0320485
Chst11	0.0818222	2.6088e-06	0.0789998	0.127931	0.000641318	0.0339038
Aff3	0.0479825	0.0329832	1	0.15197	0.000656067	0.0344038
Klhl3	0.102094	6.76575e-09	0.00020488	0.16201	0.000675999	0.0351655
Vopp1	0.000475521	0.598845	1	0.128062	0.000724216	0.0368392
Frrs1l	0.0626736	5.3725e-05	0.470184	0.106846	0.00072517	0.0368392
Plppr4	0.286264	7.6963e-35	2.33059e-30	0.0914464	0.000792368	0.039087
Ptprn2	0.193178	1.69752e-23	5.14044e-19	0.116304	0.000797942	0.039087
Cdc40	0.0621854	2.42703e-05	0.41516	0.127005	0.000872163	0.0418542
Macrod1	0.0419658	0.00149185	0.881057	-0.21325	0.000893605	0.0427255
Dapk1	0.150379	4.89888e-13	1.48348e-08	0.122194	0.000946952	0.0447822
Rimbp2	0.0715314	0.00020576	1	0.126027	0.000966347	0.0452063
Fermt2	-0.0320386	0.351897	1	-0.112356	0.000996315	0.0457847
5031439G07Rik	-0.12599	5.2754e-05	0.627618	-0.117629	0.00102798	0.0470734
Dlg3	0.0698013	2.9851e-07	0.00903949	0.0879799	0.00103392	0.0471796
Dgki	0.0731434	4.17142e-05	0.450096	0.204814	0.00103843	0.0472194
Carf	0.0406862	0.00724395	1	0.140535	0.00104347	0.0472835
Lcor	-0.0383773	0.103065	1	0.235737	0.00108572	0.0481593
Epha5	0.0992533	0.637492	1	0.12026	0.00110152	0.0482331
B230219D22Rik	0.00807528	0.122899	1	0.108129	0.00116331	0.0500957
Icam5	0.222242	1.68674e-36	5.10778e-32	0.11597	0.00117267	0.0503317
Rasgrf1	0.0592832	0.185038	1	0.114161	0.00119986	0.0511612
Dcun1d4	0.0704649	0.000230098	0.738016	0.105243	0.0012124	0.0515272
Bclaf1	-0.00767066	0.401828	1	0.0934627	0.00122234	0.05178
Dnal1	0.0175143	0.108535	1	0.11155	0.0012309	0.0519736
Dzip3	0.0281916	0.745813	1	0.105085	0.00124645	0.0524597
Tmem178b	-0.210759	8.7519e-11	2.65025e-06	0.17734	0.00125535	0.0526638
Lingo1	0.0832883	8.24108e-09	0.000249556	0.121372	0.00126687	0.0527809
Scn3a	0.139061	2.99577e-06	0.0907179	0.126486	0.00127235	0.0527809
Ndufa3	0.0648324	5.63221e-09	0.000170555	-0.10728	0.00127437	0.0527809
Otud7b	-0.263658	3.84612e-18	1.16468e-13	-0.13367	0.00135178	0.0552828
Virma	0.03696	0.00185718	1	0.136648	0.00136202	0.0555271
Fbxo7	-0.0582326	0.0232338	1	-0.11726	0.00137969	0.0560713
Xpr1	0.106215	1.43237e-06	0.043375	0.104054	0.00143656	0.0576619
Hs6st3	0.158117	6.40209e-10	1.93868e-05	0.241212	0.00144326	0.0577526
Kcnh5	0.0666529	7.90611e-05	0.468785	0.237387	0.0014593	0.0580372
Syn3	0.064484	3.85852e-05	0.473425	0.229265	0.001465	0.0580862
G3bp2	0.0679674	9.96821e-06	0.200449	0.0881286	0.00148466	0.0585089
Syt5	0.146183	1.7319e-22	5.24453e-18	0.12263	0.00155196	0.0604936
Zyg11b	0.013918	0.265267	1	0.113943	0.00155362	0.0604936
Celf5	0.237657	1.65314e-36	5.00605e-32	0.0907782	0.0015623	0.0606499
Pcsk2	0.362828	2.26584e-52	6.86141e-48	0.0875121	0.00163336	0.0624457
Atp6v1a	0.0301886	0.126849	1	0.0844232	0.00163881	0.0624457
Soga3	-0.00437	0.519659	1	0.108823	0.00165676	0.0628169
Cplx1	0.0367414	0.00308051	1	-0.130618	0.00166949	0.0631156
Ppm1h	-0.0768452	0.398307	1	0.114654	0.00169253	0.0637296
Ankrd6	0.0762697	1.46044e-06	0.0442252	0.121024	0.00175346	0.0653129
Cox6b1	0.106522	2.10397e-12	6.37123e-08	-0.102525	0.00177889	0.0657417
Ppfia2	0.0619096	0.0126519	1	0.121056	0.00185922	0.0669785
Epha7	0.0392181	0.725307	1	0.116951	0.00190833	0.0678183
Cracdl	0.189042	5.8401e-15	1.7685e-10	0.094762	0.00193725	0.0682763
Kpna1	0.0324753	0.00414338	0.843226	0.0897583	0.00195373	0.0684858
Cdk17	0.125152	8.9024e-10	2.69582e-05	0.0973478	0.00197154	0.0688337
Slc35f1	0.0617681	0.183558	1	0.105253	0.00197424	0.0688337
Slain1	-0.282563	7.4118e-14	2.24444e-09	-0.129533	0.00198916	0.0689841
Sema4d	-0.0614564	0.0534923	1	-0.117886	0.00199763	0.0690936
Eea1	0.00558154	0.203975	1	0.128152	0.00203374	0.0701561
Junb	0.14312	4.47354e-16	1.35468e-11	0.27352	0.00206448	0.0708777
Ddr1	-0.0746237	0.00119841	1	-0.120831	0.00206556	0.0708777
St6galnac5	0.0505655	2.48343e-05	0.48544	0.149901	0.00211195	0.0717955
Nrbp2	-0.163524	5.77559e-11	1.74897e-06	-0.124402	0.00214591	0.0721775
Nsf	0.0399478	0.361123	1	0.0862385	0.00217081	0.0725742
Gsn	-0.102768	3.77993e-09	0.000114464	-0.12278	0.00218441	0.0727763
Tspan2	-0.239087	3.39479e-27	1.02801e-22	-0.132205	0.00220419	0.0729967
Mal	-0.385417	4.28097e-42	1.29636e-37	-0.143003	0.0022059	0.0729967
Clock	0.0251014	0.000268704	0.851616	0.100637	0.00223371	0.0737295
Tubb4a	-0.176836	4.58779e-11	1.38928e-06	-0.112948	0.00225592	0.0740374
Gdap1	0.0710543	1.94552e-06	0.0589142	0.105173	0.00226012	0.0740374
Rpl18a	0.0620768	3.95107e-08	0.00119646	-0.080552	0.00238218	0.0772574
Mtmr6	0.0110462	0.0708992	1	0.0843908	0.00239094	0.0773488
Plcxd3	0.0815032	4.05508e-06	0.122796	0.301874	0.00240038	0.0774277
Trim44	-0.0466665	0.441888	1	0.0889563	0.0024485	0.077855
Syt16	0.0975921	0.00537143	1	0.116443	0.00248455	0.0786363
Fktn	-0.0295301	0.257289	1	0.122141	0.00254952	0.0800883
Camsap1	0.0560347	7.42335e-07	0.0224794	0.102446	0.00257989	0.0805978
Kcnn3	0.108502	1.0875e-13	3.29316e-09	0.198905	0.00260742	0.0811232
Eefsec	-0.0153723	0.555484	1	0.153726	0.00265074	0.0820782
Shisa7	0.0909121	1.9074e-09	5.77598e-05	0.108832	0.00268448	0.0827289
Add2	0.0970094	4.75909e-08	0.00144115	0.106037	0.00271729	0.0835421
Iqgap2	0.0877456	6.21018e-08	0.00188057	0.166189	0.00287035	0.0873714
Nyap2	-0.0344736	0.246971	1	0.142282	0.00301562	0.0893689
Bin1	-0.254331	1.28205e-12	3.88231e-08	-0.0864332	0.00302078	0.0893689
Rtn1	0.259316	2.48248e-37	7.51745e-33	0.0764235	0.00304771	0.0894706
Pam	-0.105369	0.00332289	1	0.0835647	0.00307003	0.0897918
Tlk1	0.0677964	1.40688e-05	0.319701	0.0856173	0.00307663	0.0897918
Slc48a1	0.00897061	0.273012	1	-0.0910375	0.00307936	0.0897918
Jazf1	-0.0465057	0.0013636	1	0.141361	0.00309507	0.0900479
Camkv	0.410143	2.58203e-60	7.8189e-56	0.0788561	0.00314368	0.0910351
Ell2	-0.0325199	0.575257	1	-0.121159	0.00325927	0.0927501
B230209E15Rik	0.10448	0.000574136	0.748703	0.138672	0.00332529	0.0939376
Eipr1	0.0164697	0.0743434	1	0.109115	0.00341343	0.0960857
Agtpbp1	0.00617044	0.0901963	1	0.0840864	0.00353887	0.0989064
Phf24	0.124912	2.82291e-12	8.54832e-08	0.0815238	0.00353947	0.0989064
Pde4b	-0.649647	1.85675e-31	5.6226e-27	0.0971942	0.00358646	0.0994497
Ccnt2	-0.0157555	0.492896	1	0.103334	0.00372946	0.102954
Dcaf6	-0.0458271	0.00279393	1	0.0841559	0.00384015	0.104667
Ccdc30	0.0476252	0.0148268	1	0.146581	0.00384477	0.104667
Opcml	-0.0265611	0.463785	1	0.109575	0.00392625	0.106156
Sgsm1	0.051571	0.00141984	0.950361	0.129692	0.00398912	0.107361
Rps28	0.0618412	5.51831e-10	1.67105e-05	-0.0834179	0.00421572	0.110535
Tafa2	-0.0969308	0.000610449	0.840981	0.20927	0.00423778	0.110696
Pkp4	-0.249205	2.61831e-18	7.92877e-14	-0.0838123	0.00424962	0.110696
Lmo7	0.182792	5.04164e-15	1.52671e-10	0.107788	0.0042559	0.110696
Nedd4	0.00354083	0.597553	1	0.0751302	0.00429373	0.11078
Rab31	-0.225555	8.15431e-19	2.46929e-14	-0.088861	0.00430445	0.11078
Foxn3	-0.331962	1.59016e-22	4.81534e-18	-0.132581	0.00430695	0.11078
Cox6a1	0.194754	7.91579e-21	2.39706e-16	-0.0883113	0.00430925	0.11078
Usp46	0.0321887	0.0388332	1	0.0924687	0.00435616	0.110955
Spin1	0.0320318	0.011512	1	0.0751301	0.00446609	0.11278
Map4	-0.141852	0.00401097	1	-0.0710936	0.00458548	0.115124
Kcnip3	0.0219073	0.0524691	1	0.101436	0.00461642	0.115233
Pdpk1	0.0799334	1.04882e-07	0.00317605	0.0960855	0.0046282	0.115306
Fam171b	0.0211068	0.0592487	1	0.0804811	0.00471228	0.116905
Ccp110	-0.166819	3.79813e-10	1.15015e-05	-0.103007	0.00480059	0.118018
Shc3	-0.0309002	0.325307	1	0.184135	0.004839	0.118432
Pja2	0.0146055	0.685372	1	0.0871632	0.00484067	0.118432
Elovl5	-0.00529329	0.472649	1	-0.100365	0.00492422	0.120149
Ildr2	0.0475145	0.00160545	1	0.147151	0.00495048	0.120564
Fam126b	0.113011	1.96121e-11	5.93893e-07	0.115175	0.00497621	0.120738
Mmp16	-0.0343317	0.357345	1	0.159545	0.00501215	0.121384
Asb3	0.0267657	0.0268752	1	0.146513	0.00507431	0.122433
Tusc3	0.134839	1.27065e-09	3.84779e-05	0.0809894	0.00512661	0.122751
Lmo3	0.106263	3.20398e-10	9.70229e-06	0.101874	0.00513963	0.122751
Acvr2a	0.0524123	0.00243802	1	0.140615	0.00516298	0.122751
Slit3	0.125773	1.31303e-07	0.00397612	0.149703	0.00520618	0.123102
Snca	0.147096	3.50442e-14	1.06121e-09	0.111243	0.00528854	0.123817
Ttc19	0.0257409	0.00901559	1	0.0941197	0.00529171	0.123817
Ppm1e	-0.124105	1.49771e-18	4.53536e-14	0.116184	0.00531534	0.123882
Rasgrp1	0.162241	2.12225e-16	6.42661e-12	0.0923822	0.00533233	0.124055
Snx7	0.0231417	0.019089	1	0.159415	0.00543084	0.125839
Atp5j2	0.0781213	1.28897e-09	3.90326e-05	-0.0974705	0.00566275	0.130002
Gucy1b1	0.130328	2.35141e-12	7.12054e-08	0.0959705	0.00566791	0.130002
Kndc1	-0.197573	9.59176e-17	2.90458e-12	-0.121716	0.00567796	0.130003
Slc16a7	-0.0199362	0.567168	1	0.11164	0.00580296	0.132167
Kcnh1	0.100181	2.09924e-07	0.00635693	0.130867	0.00586666	0.13288
Calb1	0.109994	3.81945e-10	1.1566e-05	0.118308	0.00600924	0.135519
Vegfa	0.00390771	0.0356146	1	-0.153847	0.00601264	0.135519
Cdc42se2	-0.0161379	0.11113	1	0.0882716	0.00630403	0.141067
Adcy9	0.0130846	0.724412	1	0.169499	0.00631304	0.141067
Npc1	-0.0188248	0.669929	1	-0.123272	0.00632589	0.141112
Uri1	-0.00320531	0.245604	1	0.0959839	0.00639882	0.142494
Fam102b	0.0371144	0.00439369	1	0.117271	0.0064138	0.142566
Serinc1	0.12219	5.27458e-11	1.59725e-06	0.0682301	0.00647487	0.143272
Zc3h6	0.0498692	0.0011615	1	0.144009	0.00647779	0.143272
Megf9	-0.0218324	0.523633	1	0.098704	0.0067338	0.147334
Golga3	0.00954222	0.23523	1	0.0858666	0.00674077	0.147334
Nsg2	0.158291	1.40501e-15	4.25465e-11	0.0713772	0.00677326	0.147796
Ppp4r2	0.0263532	0.00553918	0.882756	0.0905344	0.00682193	0.14836
Rundc3b	0.0447666	0.00367008	0.985936	0.105617	0.00689113	0.149099
Kidins220	0.160475	0.010561	1	0.0845176	0.00690947	0.149099
Sorcs2	0.159639	2.80697e-12	8.50007e-08	0.0934724	0.00693251	0.149099
Spata13	0.018304	0.0603403	1	0.138902	0.00693507	0.149099
Avl9	0.017173	0.0836999	1	0.0937378	0.00700597	0.149621
Cnrip1	-0.00744559	0.729291	1	0.118358	0.00701979	0.149621
Pak3	-0.0169908	0.00849674	1	0.103572	0.00702948	0.149621
Wdr47	0.10902	5.86247e-09	0.000177527	0.0783587	0.00705629	0.149946
Dgkd	-0.0248955	0.482856	1	0.0849757	0.00708784	0.150371
Rab11fip2	-0.00184662	0.243393	1	0.0889452	0.00718562	0.151832
Rragd	0.0486817	0.000758934	0.864087	0.0933293	0.00721823	0.152144
Dclk1	0.0734388	2.08847e-05	0.352655	0.102104	0.00734221	0.153679
Rpl21	0.0266372	0.0182281	1	-0.0769981	0.00739286	0.154324
Glce	0.0547795	2.4167e-05	0.268208	0.0983822	0.00746545	0.155093
Slc6a15	0.0704191	1.57515e-07	0.00476986	0.11326	0.00748588	0.155109
Togaram1	0.0327238	0.00314754	1	0.121316	0.00749007	0.155109
Syt4	0.19492	9.40622e-28	2.84839e-23	0.0948222	0.00755334	0.15617
Pcyt2	-0.0587751	0.457028	1	-0.0993606	0.0076001	0.156215
Mpzl1	-0.0679292	0.00276963	1	-0.130729	0.00761556	0.156215
Cacng8	0.0108607	0.502844	1	0.0915376	0.00762764	0.156216
Oga	0.0770683	7.94003e-06	0.212527	0.0850379	0.00765608	0.156552
Ascc3	-0.0500564	0.00330916	1	0.147601	0.00774493	0.158121
Tead1	0.0228829	0.387343	1	0.127815	0.00780753	0.159149
Sypl	-0.0541706	0.163708	1	-0.0963966	0.00783402	0.159439
Oprm1	0.0733784	8.08013e-06	0.244682	0.369309	0.00788721
Kalrn	0.15139	2.43675e-19	7.37898e-15	0.123897	0.00797664	0.161028
Nus1	0.0252244	0.0127772	1	0.0803609	0.00799879	0.161028
Cmtm5	-0.0876423	7.24528e-13	2.19402e-08	-0.120444	0.00805052	0.161819
Synpr	-0.167677	0.120306	1	0.109693	0.00813325	0.162906
Gcc2	0.0281062	0.00796981	1	0.0980427	0.00831989	0.164394
Arhgap6	0.126837	3.0178e-07	0.00913849	0.213069	0.00832496	0.164394
Reps2	-0.00108258	0.416496	1	0.113197	0.00835822	0.164394
Cdk14	-0.0918813	0.000271607	0.901098	0.0956314	0.00838169	0.164394
Taldo1	-0.0311546	0.330532	1	-0.0824786	0.00841079	0.164394
Cul5	0.0578839	4.11342e-05	0.549608	0.0864548	0.00841632	0.164394
Slc12a2	-0.328023	9.47758e-21	2.87e-16	-0.137746	0.0084567	0.164394
Qk	-0.768317	4.75024e-69	1.43847e-64	-0.0983178	0.0086055	0.166021
D430041D05Rik	0.05148	0.0361751	1	0.104662	0.00886988	0.168951
1700047M11Rik	-0.328125	2.88127e-32	8.72507e-28	-0.168797	0.008873	0.168951
Cacng2	0.00773394	0.42855	1	-0.103584	0.00891434	0.168996
Mapk8	-0.00390339	0.298504	1	0.0935894	0.00894958	0.169272
Serinc5	-0.0629002	0.275769	1	-0.0889985	0.00901645	0.169588
Rap1a	-0.175974	2.31741e-06	0.0701757	-0.112636	0.00902165	0.169588
Kpna3	0.0276844	0.0132507	1	0.0837994	0.00902381	0.169588
Baiap2	0.269194	1.12391e-25	3.40344e-21	0.0818421	0.00909721	0.17072
Gm10754	0.252108	9.16203e-22	2.77445e-17	0.196802	0.00914968	0.171458
Ipo11	0.0182695	0.00767711	1	0.0841522	0.00919317	0.171808
Stmn4	-0.156979	4.50382e-05	0.510852	-0.0952794	0.0092449	0.171946
Cog5	-0.0654174	0.482117	1	0.0960246	0.00925505	0.171946
Il34	0.0700294	3.58024e-09	0.000108417	0.0946303	0.00927259	0.172026
Rffl	-0.146246	7.05064e-09	0.000213507	-0.149731	0.00932474	0.172423
Ica1l	0.0632912	2.99335e-05	0.233521	0.0921353	0.0093338	0.172423
Arpp19	0.182398	9.9263e-19	3.00588e-14	0.0835383	0.009358	0.172625
Abca8b	-0.0153382	0.367422	1	0.118693	0.00943679	0.173586
Mapk1	0.0811739	7.40385e-05	0.433467	0.0846956	0.00952225	0.17443
Lrch1	-0.0440947	0.729423	1	-0.124786	0.00953436	0.17443
Eftud2	0.0271157	0.0265214	1	0.0878694	0.00955483	0.174457
Ncoa2	-0.141127	2.00786e-12	6.0802e-08	0.105062	0.00956461	0.174457
Smarca1	0.104258	2.56617e-08	0.000777087	0.101884	0.0095916	0.174704
Xylt1	-0.109603	0.270423	1	0.11912	0.00969404	0.175611
Uhrf1bp1l	0.0723705	3.48489e-05	0.3578	0.0882649	0.0097345	0.175611
Gm38393	0.141277	4.13823e-11	1.25314e-06	0.178429	0.00985896	0.177041
Fnbp1l	0.140809	7.55263e-09	0.000228709	0.116905	0.00992357	0.177277
Vps33a	0.0235502	0.0528003	1	0.0913424	0.00992371	0.177277
Rock2	-0.0096795	0.228249	1	0.0966538	0.00999318	0.178017
Fam171a1	0.0590496	6.46644e-05	0.811816	0.0834035	0.0101102	0.178888
Cxadr	0.0414396	0.0155288	1	0.154237	0.010162	0.179429
Appl2	-0.0795014	2.93279e-05	0.437067	-0.0865078	0.0101748	0.179429
Man1a2	-0.00642341	0.665705	1	0.0901227	0.0101878	0.179429
Slc9a7	0.0669862	3.72262e-05	0.580188	0.207079	0.0102097	0.179429
Ctdspl2	-0.00451649	0.63477	1	0.124621	0.0102289	0.179523
Cox5b	0.161917	5.69761e-25	1.72535e-20	-0.0819079	0.010297	0.17999
Atl1	0.0536549	0.000126716	0.534755	0.0775617	0.0103241	0.180221
Slc2a3	0.0719291	7.28003e-07	0.0220454	0.0868094	0.010393	0.180938
Rprd1a	0.0228707	0.0188554	1	0.0865593	0.0105819	0.182034
Il1rap	-0.31953	7.45093e-24	2.25629e-19	-0.110119	0.0106052	0.182194
Zzz3	-0.029013	0.594078	1	0.0811488	0.0106963	0.183275
Tsnax	0.0644085	5.0541e-05	0.523014	0.0787596	0.0108934	0.185012
Usp47	-0.00691329	0.302624	1	0.0840682	0.0109131	0.185039
Ttll5	-0.207129	9.88318e-09	0.000299282	-0.110711	0.0109954	0.185334
Gsg1l	0.121402	1.17018e-11	3.54354e-07	0.0846152	0.0111641	0.186915
Tbc1d8	0.167684	1.58528e-18	4.80053e-14	0.103236	0.0111796	0.186915
C2cd3	-0.000795883	0.416043	1	0.117079	0.0113065	0.188278
Lgmn	-0.0683379	0.0161837	1	-0.0770979	0.0113224	0.188278
Ndufa11	0.0451071	8.47788e-05	0.808186	-0.0859125	0.0113584	0.188278
Dgkb	0.317536	1.35434e-38	4.1012e-34	0.0945098	0.0114029	0.188278
Xiap	-0.0447082	0.326204	1	0.0883744	0.0114327	0.188444
Pds5a	-0.0186927	0.490713	1	0.085721	0.0115909	0.190087
Wdr17	0.121832	8.77659e-05	0.548712	0.0934901	0.0116055	0.190087
Cyfip2	0.114612	2.0231e-06	0.0612635	0.0800065	0.0116577	0.190174
Apoe	0.167636	0.0387656	1	-0.0821936	0.0117481	0.190504
Ift57	0.0183419	0.126549	1	0.0892289	0.011891	0.192342
D130043K22Rik	0.023108	0.0244484	1	0.115529	0.0121743	0.195087
Ogfod1	0.0415479	0.000748908	0.838543	0.0794945	0.012295	0.196009
Kantr	0.0569494	0.000103073	0.710783	0.118276	0.0123682	0.196009
Appl1	0.0568043	0.00205724	0.810288	0.0876467	0.0123769	0.196009
Vat1l	0.0819337	3.06693e-06	0.0928729	0.124296	0.012389	0.196009
Cd81	-0.126595	0.00333528	1	-0.0741534	0.0124353	0.196264
Pde4dip	-0.0582699	0.000569523	0.802922	0.0840304	0.0124943	0.196955
Ttc3	0.193828	2.72959e-29	8.26574e-25	0.0775635	0.0125391	0.197185
Gprin3	0.077324	5.93052e-07	0.0179588	0.136376	0.0126701	0.19844
Pakap	-0.174749	6.47562e-07	0.0196095	0.171225	0.0127628	0.199256
Slc4a7	0.0191426	0.0316794	1	0.117038	0.0128196	0.199902
Arrdc3	-0.205258	5.60868e-16	1.69842e-11	-0.108079	0.0130412	0.202278
Kif5b	0.0220181	0.0176394	1	-0.104613	0.0130531	0.202278
Actr3b	0.157579	1.48415e-18	4.49431e-14	0.0734132	0.013079	0.202278
Tmbim6	-0.000535294	0.0204169	1	-0.0654936	0.0131042	0.202399
Nkain3	0.134428	2.6483e-06	0.0801959	0.222416	0.0131586	0.202999
Ggact	0.00413873	0.523988	1	-0.152366	0.0133106	0.205099
Rps14	0.0232935	0.0332023	1	-0.0734237	0.0134348	0.20628
Nr4a1	0.132915	2.44397e-09	7.40083e-05	0.257727	0.0135063	0.20663
Scarb2	-0.0725867	0.00342833	1	-0.0701081	0.0135123	0.20663
Arpp21	0.230497	1.67069e-28	5.05917e-24	0.0854161	0.0135433	0.206725
Tcaf1	0.0924089	4.77139e-06	0.144487	0.0742443	0.0136348	0.207392
Klhl7	0.109047	4.76206e-09	0.000144205	0.0827908	0.0136961	0.207596
Slc20a2	-0.0775328	0.0932563	1	-0.0908967	0.0137219	0.207745
Sytl5	-0.00354015	0.604379	1	0.226224	0.0138044	0.208751
Tmem63c	0.0538524	7.86238e-06	0.238089	0.105787	0.0138473	0.209157
Fam120a	0.00360811	0.0972133	1	0.0638573	0.0139506	0.209383
Slc8a2	0.10198	3.67391e-15	1.11253e-10	0.0787719	0.0139895	0.209383
Dclk3	0.0839863	3.57104e-10	1.08138e-05	0.106384	0.0139937	0.209383
Norad	0.111941	3.71031e-15	1.12356e-10	0.0656488	0.013994	0.209383
Tpt1	0.080808	1.24531e-08	0.000377103	-0.0735186	0.0140375	0.209383
Prkacb	0.0133656	0.321839	1	0.0753883	0.0141357	0.210322
Hlf	0.0336087	0.00771878	1	0.0813016	0.0142183	0.210842
Ift88	0.00562593	0.411426	1	0.127406	0.0143669	0.211708
D430036J16Rik	0.0155245	0.197145	1	0.153327	0.0143743	0.211708
Nrg3	0.0706739	0.00396767	1	0.121756	0.0144457	0.212518
Phex	0.0484394	9.21176e-05	0.469825	0.300778	0.014586	0.213857
Gcnt2	0.0494906	0.000876666	0.633832	0.0961946	0.0149326	0.216739
St18	-0.901325	1.5146e-69	4.58651e-65	-0.133566	0.0150017	0.217499
Prdm10	0.0192586	0.104522	1	0.114893	0.0150392	0.217801
Npas4	0.157052	4.31392e-12	1.30634e-07	0.138434	0.0151411	0.219004
Snap91	-0.0728501	3.25541e-06	0.0985803	0.0723735	0.0154484	0.221997
Adgrb2	0.127521	4.69435e-19	1.42154e-14	0.0743553	0.0154733	0.222056
Dnajc10	0.0498289	5.59018e-05	0.816596	0.0861215	0.0155952	0.22312
Csrnp3	0.0780664	0.000169207	0.812597	0.0886548	0.0158484	0.224764
1700025G04Rik	-0.0187058	0.491631	1	0.0879019	0.0160147	0.22574
Cyld	0.0579004	0.00264217	1	0.0939912	0.016086	0.22616
Skil	0.0441702	0.000767258	0.677628	0.102641	0.0161916	0.227399
Chga	0.0475186	0.00043042	0.76804	-0.0761404	0.0162601	0.227869
Tmem106b	0.0242208	0.00735217	1	0.0738662	0.0163679	0.228887
Yme1l1	0.0469308	0.00120244	0.94466	0.0765337	0.0164068	0.229093
D7Ertd443e	-0.37288	4.27425e-21	1.29433e-16	-0.13878	0.0164179	0.229093
Mapkbp1	0.0636908	4.19954e-06	0.12717	0.101432	0.0164848	0.229289
Chl1	0.0073044	0.0106435	1	0.135513	0.0166765	0.230204
Fzd3	0.11315	2.31597e-11	7.01323e-07	0.109169	0.0166856	0.230204
Mtmr7	0.0583389	0.00109103	0.620675	0.0847761	0.0166922	0.230204
Scamp1	0.0738631	1.7904e-07	0.00542169	0.0741621	0.0167642	0.230389
A830018L16Rik	-0.0509485	0.0210835	1	0.0789853	0.016785	0.230389
Slc2a13	-0.0120888	0.665914	1	0.106068	0.016884	0.230389
Sobp	-0.0886577	0.00191694	1	0.10362	0.0168928	0.230389
Clip1	0.0596332	0.000131637	0.397939	0.0789496	0.0169127	0.230389
Inpp4a	0.134051	2.71637e-11	8.22572e-07	0.0852588	0.0170189	0.231518
Neat1	-0.331218	4.71818e-25	1.42876e-20	-0.237683	0.0171774	0.232594
Creb1	-0.0295565	0.51417	1	0.0814929	0.0172018	0.232594
Smarcc1	0.0332411	0.0199556	1	0.0723266	0.0172053	0.232594
Dgkg	-0.0109085	0.455735	1	0.275291	0.0173244	0.232823
Arhgap21	-0.0995273	3.94623e-05	0.56435	0.0954988	0.0173297	0.232823
Abr	0.0802392	3.20381e-08	0.000970177	0.0813655	0.0173599	0.232988
Clu	0.16632	6.103e-07	0.0184811	-0.0708297	0.0175417	0.234702
Glul	-0.096075	7.85167e-06	0.237764	-0.081912	0.0176193	0.235497
Zfr	-0.00310513	0.624975	1	0.0612785	0.0176797	0.235579
Efnb3	-0.0260656	0.745643	1	-0.0942739	0.0177964	0.236222
Cadm3	0.0997784	1.25608e-12	3.80367e-08	0.0701054	0.0178006	0.236222
Phactr1	0.261344	2.8799e-19	8.72093e-15	0.0809813	0.0178642	0.236824
Hdac2	0.030917	0.0291833	1	0.0821141	0.017926	0.237365
Matr3	0.0760126	1.20345e-07	0.00364429	0.0710939	0.0181003	0.238046
Ptk2	-0.150739	5.09774e-11	1.5437e-06	0.0733112	0.0181533	0.238046
Rrbp1	-0.0679477	0.0187897	1	-0.0883616	0.0182584	0.238046
1810013L24Rik	0.0237662	0.0306257	1	0.0920282	0.0182818	0.238046
Vps50	0.00902801	0.0235878	1	0.0786983	0.0183378	0.238046
Abi1	0.0211484	0.0148362	1	0.0800866	0.0183418	0.238046
Rnft2	0.0282917	0.00880839	1	0.0681393	0.0183543	0.238046
R3hdm1	0.0549179	0.000469558	1	0.088618	0.0183794	0.238046
Gpm6a	0.183294	5.37574e-22	1.62788e-17	0.0643808	0.0184841	0.238046
3110039M20Rik	0.0374509	0.016829	1	-0.215162	0.0187133	0.2393
Lrrn3	0.041674	0.00172763	1	0.115092	0.0187141	0.2393
Acss2	-0.0234503	0.60611	1	-0.0847819	0.018807	0.239555
Slk	-0.0619195	0.779939	1	0.0849023	0.018841	0.239753
Cacnb4	0.0782622	3.76854e-05	0.478903	0.0753137	0.0190143	0.241015
Rpl36	0.0899081	6.70359e-11	2.02998e-06	-0.0792546	0.0193495	0.243322
Rpl26	0.0342683	0.00220313	1	-0.0704767	0.0194116	0.243529
Dhx32	0.027953	0.00420818	1	0.0910034	0.0196413	0.245233
A230006K03Rik	0.160355	7.44843e-13	2.25553e-08	0.261315	0.0196488	0.245233
Cox7c	0.136056	3.01145e-14	9.11928e-10	-0.0744517	0.0196991	0.245625
Ncoa7	0.0318414	0.024947	1	0.0843011	0.0197547	0.245902
Ireb2	-0.0364089	0.483664	1	0.082587	0.0197972	0.24614
Wasl	0.0309223	0.00241314	1	0.0695535	0.0199062	0.247113
Rcn2	0.033155	0.0151232	1	-0.0777248	0.020129	0.248566
Mef2d	0.0524552	5.06004e-05	0.44721	0.0771833	0.0201643	0.248566
Fhip1b	0.0249042	0.0221798	1	0.0790094	0.0202447	0.249123
C2cd2l	0.0972599	1.94275e-11	5.88302e-07	0.0795545	0.0203271	0.249446
Btbd8	0.0022426	0.257808	1	0.0689597	0.0203655	0.249626
Rad23b	-0.0157518	0.692306	1	0.0608913	0.0204604	0.250036
Cyria	0.0742977	0.000156983	0.291992	0.0609149	0.0204826	0.250036
Ppp1r9a	0.134884	1.90004e-11	5.75371e-07	0.102676	0.0205142	0.250036
Mctp1	0.171584	4.13956e-14	1.25354e-09	0.10698	0.0205248	0.250036
Iws1	-0.0271947	0.375366	1	0.0880157	0.0206033	0.250247
Tnks2	0.0125042	0.126598	1	0.070115	0.0206144	0.250247
Fig4	0.0250737	0.110412	1	0.0924157	0.020707	0.250635
Cobll1	-0.145079	4.69653e-18	1.4222e-13	-0.13075	0.0207837	0.251078
Ppp2r2b	0.0434168	0.00552189	1	0.0768589	0.0208438	0.251227
Slc6a17	0.0556164	0.000230833	0.899191	0.071673	0.0209836	0.25153
Sec14l5	-0.297793	4.22931e-29	1.28072e-24	-0.136608	0.0213229	0.253734
Tmem108	-0.0658254	0.0060197	1	-0.147241	0.0213249	0.253734
Tmem117	-0.104836	0.10817	1	-0.145121	0.0213662	0.253992
Rpl37	0.101536	1.22158e-13	3.69918e-09	-0.0679003	0.0217529	0.256945
Agpat4	-0.126535	1.90068e-05	0.258127	-0.0925406	0.0217876	0.257121
Arhgap23	-0.375059	2.79387e-28	8.4604e-24	-0.0709262	0.0218359	0.257152
Esrrg	-0.0590835	0.286601	1	-0.235503	0.0219042	0.25733
Rab11fip3	0.0240847	0.0166565	1	0.0756472	0.0220184	0.257977
Zkscan16	0.0186327	0.0567789	1	0.221746	0.0220203	0.257977
Dlx6os1	-0.028183	0.470494	1	0.0894014	0.0220981	0.257977
Rpl13	0.0744026	3.31884e-07	0.0100501	-0.0653217	0.0222698	0.259083
E130102H24Rik	-0.00901307	0.23748	1	0.248472	0.0223718
Sipa1l1	0.188633	3.0847e-25	9.34109e-21	0.105848	0.0223921	0.259083
Gpr158	0.140566	3.57051e-14	1.08122e-09	0.0908775	0.0226017	0.261275
Marchf6	0.0764616	2.84671e-07	0.00862041	0.0780902	0.0230403	0.264932
Mest	0.0644109	3.44433e-05	0.554088	0.15587	0.0231322	0.265081
Gm2164	0.116678	2.89647e-08	0.000877109	0.319842	0.023201
Usp3	0.0846275	2.60251e-07	0.00788093	0.0986442	0.0235627	0.268565
Psenen	0.037727	0.000539563	1	-0.0978417	0.0236325	0.268688
Synpo	0.0213821	0.0787931	1	0.075446	0.0236354	0.268688
Bbs7	0.0353939	0.00108304	1	0.104062	0.0237703	0.269279
Ubtd2	0.0590344	5.65626e-06	0.171283	0.124027	0.0238938	0.270443
Sestd1	0.0301343	0.0644804	1	0.103324	0.0239635	0.27076
Xkr4	-0.162529	7.97966e-08	0.0024164	0.244259	0.0240848	0.271659
Ccdc186	-0.0274865	0.236437	1	0.085823	0.0242564	0.273121
Wdr82	0.0184122	0.112652	1	0.063852	0.0243053	0.273434
Mllt3	-0.02707	0.461796	1	0.107359	0.0244031	0.273824
Tmem132d	-0.104226	0.0153001	1	0.109339	0.0244273	0.27386
Zfp871	0.0359618	0.00295176	1	0.0866172	0.0245783	0.274841
Tecr	0.0966615	7.41829e-09	0.000224641	-0.0725661	0.0246039	0.274891
Sema5b	0.0054422	0.377891	1	0.0999432	0.0248994	0.276059
Rps13	0.0494862	5.63956e-05	0.498257	-0.0710322	0.0249229	0.276083
Wipf3	0.103638	1.76946e-07	0.00535828	0.0834803	0.0249832	0.276279
Ldlrad4	-0.0453735	0.2962	1	0.0983382	0.0249919	0.276279
Akap11	0.0710893	6.47843e-07	0.019618	0.10314	0.0250467	0.276279
Igip	0.0582063	3.49121e-07	0.0105721	-0.123775	0.0250839	0.276394
Camk2g	0.029632	0.00242702	1	-0.0922817	0.0251209	0.276394
Sh2d5	0.274636	1.87602e-44	5.68097e-40	0.0737077	0.0252837	0.277248
Trappc11	0.0709906	5.95488e-07	0.0180326	0.0698443	0.0253244	0.277248
Anks1	0.0191699	0.0207796	1	-0.0834779	0.0253264	0.277248
Ptprd	-0.195771	2.72196e-09	8.24263e-05	-0.0930375	0.0253986	0.277575
Rpl29	0.0801741	7.4078e-14	2.24323e-09	-0.06876	0.025399	0.277575
Rpl19	0.0945629	4.64954e-10	1.40797e-05	-0.060523	0.0254597	0.277644
Slco3a1	-0.0906897	0.00905828	1	-0.0897785	0.025596	0.278092
Ppp2r3a	-0.277242	1.05802e-11	3.20391e-07	-0.0870997	0.025763	0.279439
Rps3a1	0.0144864	0.0478942	1	-0.0635652	0.0259535	0.28057
Ppil4	0.0325551	0.00139316	0.80806	0.084146	0.0259928	0.280761
Ccsap	0.0312795	0.0221949	1	0.0946348	0.026075	0.281389
Dmxl1	-0.141276	1.43407e-11	4.34265e-07	0.106648	0.0261035	0.281389
Stim1	-0.0140975	0.313529	1	0.0695933	0.0262127	0.281389
Gabrb1	0.172313	8.27507e-11	2.50586e-06	0.114519	0.0262457	0.281389
Sgcd	-0.0156291	0.103916	1	0.383315	0.0262548
Acox1	0.0356052	0.00307226	0.729933	0.0602995	0.0263312	0.281841
Ppp3r1	0.109892	1.55205e-09	4.69992e-05	0.0641855	0.0263575	0.281891
Acap3	0.0368343	0.000947429	1	0.0713049	0.0268215	0.285445
Sptb	0.0874237	3.04033e-06	0.0920671	0.102596	0.027037	0.287268
Pcnx	0.0586289	8.56836e-05	0.647213	0.0944309	0.0272516	0.28884
Htr2c	0.226467	1.04549e-11	3.16595e-07	0.122324	0.0274788	0.290098
Sp4	-0.0231892	0.609456	1	0.094481	0.0274923	0.290098
Dmtf1	0.0202816	0.0278601	1	0.0771763	0.027594	0.290575
Cdkl2	0.0312941	0.0180365	1	0.0904336	0.0281392	0.294417
Prkci	0.0535222	0.000101655	0.4323	0.075752	0.0281685	0.294479
Wipf1	-0.175703	3.59002e-14	1.08713e-09	-0.102785	0.0284401	0.296725
Lama2	-0.170179	6.79179e-11	2.05669e-06	-0.16612	0.0284974	0.296725
Vps35	-0.00100738	0.296318	1	0.0632826	0.0286127	0.297448
Klhdc1	0.0390313	0.000745153	0.865972	0.124426	0.0290605	0.299175
Gnal	0.179436	3.11077e-16	9.42003e-12	0.0952403	0.029142	0.299175
Npas3	-0.526075	1.32473e-19	4.01155e-15	-0.119652	0.0291422	0.299175
Golm2	0.0614475	0.00256106	1	0.0700688	0.0291933	0.299175
Wdr7	-0.0626697	2.93739e-05	0.481953	0.0854989	0.0292462	0.299175
Tasor2	-0.000328754	0.299695	1	0.0969319	0.0292778	0.299175
Rabep1	-0.0350253	0.0836984	1	0.064212	0.0293241	0.299175
Akap10	-0.0468912	0.131368	1	0.108178	0.0293957	0.299175
Senp7	0.0230003	0.305926	1	0.0861486	0.0294422	0.299175
Fam13b	-0.0658855	0.0761644	1	0.0759069	0.0294889	0.299175
Cdk12	-0.0167847	0.484715	1	0.104984	0.0295149	0.299175
Pex5l	-0.525712	1.64279e-43	4.97469e-39	-0.0864132	0.0297004	0.299887
Rlf	-0.0288145	0.630367	1	0.08876	0.029932	0.301689
Gm1043	0.150811	7.27992e-12	2.2045e-07	0.163552	0.0300858	0.301959
Marchf8	-0.0943647	2.43219e-07	0.00736515	-0.066947	0.0300887	0.301959
Sugt1	0.00491298	0.280741	1	0.0679778	0.0301015	0.301959
Arrb1	0.0771418	9.51372e-07	0.0288094	0.0660968	0.0301379	0.301959
Lrrtm4	0.152386	4.0214e-18	1.21776e-13	0.121531	0.0302185	0.302534
Smdt1	0.0507902	9.79035e-07	0.0296471	-0.0842911	0.0302771	0.302598
Tmx4	0.0575387	0.000224699	0.50862	0.0657403	0.0303376	0.302598
Fign	-0.133203	2.42234e-06	0.0733534	-0.238997	0.0303421	0.302598
Rps17	0.0519788	9.37208e-07	0.0283805	-0.0713592	0.0303583	0.302598
Rpl24	0.114095	3.14844e-20	9.53409e-16	-0.0618327	0.0303645	0.302598
Ppp1r12a	-0.0324809	0.0309438	1	0.0733719	0.0305067	0.303224
Exoc4	-0.0702607	0.00574666	1	0.0685777	0.0305206	0.303224
Pi4ka	0.0340462	0.258115	1	0.080292	0.0305696	0.303452
Zfp644	-0.0395934	0.165936	1	0.0837887	0.0305919	0.303452
Dpy19l1	-0.121083	0.000192762	0.680149	-0.0798706	0.0307733	0.304489
Bcl2	-0.0296643	0.671881	1	0.0973965	0.0308188	0.304558
Shtn1	-0.252921	1.82825e-09	5.5363e-05	-0.088244	0.0309042	0.305171
Kcnk13	-0.143419	3.96256e-09	0.000119994	-0.125356	0.0311625	0.306557
Acot7	0.0197346	0.033161	1	-0.0732439	0.0312485	0.306953
Pard3	0.0240472	0.0968129	1	0.0854338	0.0312499	0.306953
Rpl12	0.0396266	0.00200004	1	-0.0625067	0.0314854	0.308007
Cntln	-0.00898004	0.575641	1	0.104092	0.0315231	0.308007
Dpp8	-0.0228208	0.556468	1	0.0712874	0.0319628	0.31067
Kctd1	0.122389	1.45497e-10	4.40595e-06	0.069522	0.0320151	0.310713
Pkia	0.039437	0.000484936	0.711302	0.0790643	0.0322148	0.311534
Armc8	-0.0092119	0.636457	1	0.0675455	0.0322299	0.311534
Txlng	0.0582704	4.56595e-05	0.295633	0.111618	0.032266	0.311534
Elob	0.147393	1.35224e-21	4.09486e-17	-0.0708651	0.0322673	0.311534
Tox	-0.11693	0.00735726	1	0.17788	0.0323394	0.311767
Foxo1	0.121731	1.4339e-09	4.34212e-05	0.0691487	0.032428	0.312158
Pds5b	0.0483931	0.00106608	0.937977	0.0847996	0.0325018	0.312254
Etf1	0.0199583	0.0504413	1	0.0706664	0.0325152	0.312254
Zfp949	0.0100425	0.287715	1	0.100245	0.0325339	0.312254
Gpr155	0.106427	1.71082e-10	5.18071e-06	0.0884536	0.0327724	0.313847
Pde8b	0.10545	1.81839e-05	0.242448	0.0714502	0.0328036	0.313916
Foxj3	-0.0200338	0.600862	1	0.0779832	0.033064	0.315942
Nr6a1	-0.0124371	0.325551	1	0.155848	0.0331187	0.315993
Mbtps2	0.0190091	0.0478211	1	0.0904738	0.0331502	0.315993
Rcbtb1	-0.167941	1.8803e-10	5.69392e-06	-0.0897412	0.0332086	0.316113
Chrm1	0.084216	1.39289e-11	4.21796e-07	0.0742362	0.0332975	0.316113
Far1	-0.0383627	0.0280989	1	0.0756854	0.0337979	0.318812
Sec23a	0.00537498	0.113067	1	0.0680238	0.0338056	0.318812
Plpp1	0.0375226	0.000179778	0.961694	-0.103615	0.0339042	0.319021
Tspan13	0.0986995	1.30639e-09	3.95602e-05	0.0696406	0.0339722	0.319021
Xpo7	0.0125909	0.0160283	1	0.0725643	0.0340095	0.319021
Hadhb	0.0263081	0.023581	1	-0.0791982	0.034049	0.319021
Rab27b	0.0139612	0.0614646	1	0.101585	0.0340731	0.319021
Wdr48	0.0143086	0.222437	1	0.0719331	0.0341637	0.319236
Peak1	0.0386022	0.00211172	1	0.117866	0.0341743	0.319236
Fam78b	0.0138404	0.362376	1	0.0808414	0.0343637	0.320053
Josd2	-0.080343	0.00683665	1	-0.0953618	0.034393	0.320053
Rabgap1	-0.0933529	7.33676e-06	0.222172	0.0672988	0.0345266	0.32024
Xrn2	0.0331786	0.00862814	1	0.0679614	0.0345824	0.32024
Pitpnm2	0.140388	2.49417e-14	7.55286e-10	0.0936695	0.0345899	0.32024
Rpl8	0.0606112	1.36021e-07	0.00411899	-0.0611486	0.0346868	0.320733
Adamtsl1	-0.143611	1.56881e-07	0.00475067	-0.144861	0.0348362	0.321081
Edil3	-0.763929	3.65745e-62	1.10755e-57	-0.102309	0.0348799	0.321256
Fam135b	-0.0252023	0.0215783	1	0.114442	0.0349052	0.321261
Jak1	0.00202962	0.205877	1	0.0628802	0.0352957	0.323939
Pip4k2a	-0.332731	4.85963e-20	1.47159e-15	-0.077407	0.0353553	0.324257
Tub	0.0364568	0.0164592	1	0.0916135	0.0354426	0.324527
Slc12a6	-0.00269579	0.310508	1	0.0720727	0.0355199	0.324642
Lrp12	0.0248515	0.0101607	1	0.0802581	0.0357525	0.324984
Nalcn	0.0279014	0.409948	1	0.0820525	0.0358539	0.325295
Map4k3	-0.0506125	0.360599	1	0.0797417	0.0358687	0.325295
Pid1	-0.0863117	0.450605	1	0.0906241	0.036068	0.325745
Gopc	0.00843071	0.34662	1	0.0771643	0.0361157	0.325745
Fstl4	0.131207	4.35577e-10	1.31901e-05	0.146726	0.0361549	0.325845
Fam135a	-0.0105672	0.189861	1	0.0908767	0.0362104	0.326119
Naa35	0.032487	0.000472709	1	0.0768464	0.0365989	0.328254
Lancl1	0.0497857	5.18489e-05	0.48978	0.0571266	0.0366246	0.328258
Wasf3	0.0279514	0.0574616	1	0.0680878	0.0367423	0.328634
Plekhm2	0.0126472	0.167869	1	-0.0865341	0.0367741	0.328692
Prrc2b	0.0940523	6.76703e-08	0.00204919	0.0923139	0.03683	0.328837
Rab3c	-0.0020579	0.0922823	1	0.088837	0.0368841	0.328837
Gm9801	0.0897937	5.40408e-07	0.0163646	0.339798	0.0368855
Kitl	0.0691254	6.11022e-07	0.018503	0.0847795	0.0369332	0.328983
Marchf1	-0.104961	5.76944e-05	0.311953	0.116787	0.0369847	0.329217
Tomm20	0.0931573	5.53792e-10	1.67699e-05	0.0735283	0.0371915	0.329811
Mrtfa	0.0575439	6.98012e-05	0.54689	0.0904153	0.037229	0.329811
Fam76a	0.0303843	0.0191503	1	0.0680755	0.0374605	0.331411
Ipo7	0.0333783	0.00257159	1	0.0632171	0.037594	0.331914
Srpk2	0.0175879	0.251663	1	0.059123	0.0377259	0.332628
Stard9	-0.0653744	0.00296742	1	-0.132509	0.0378045	0.332869
Ppp3cb	0.0833781	2.10429e-07	0.00637222	0.0561563	0.0379358	0.333693
Zfp365	0.0566338	3.13956e-06	0.0950721	0.0709581	0.0379623	0.333693
Myrip	0.00788399	0.279906	1	0.0809401	0.0381904	0.335106
Greb1l	0.0408649	0.0159168	1	0.233339	0.0382192	0.335106
St6galnac3	-0.649327	4.58146e-41	1.38736e-36	-0.125653	0.0383232	0.335618
Sh3gl2	-0.101182	1.24358e-13	3.76582e-09	0.079392	0.038495	0.336329
Rbfox2	-0.0162182	0.394179	1	0.0743371	0.0385078	0.336329
Acsl4	0.00747902	0.30525	1	0.0834912	0.0387496	0.337141
Zfp26	-0.0137153	0.892168	1	0.10385	0.0387833	0.337141
Mrpl41	0.0494131	2.39702e-05	0.466279	-0.090895	0.0388973	0.337141
Rab30	0.0204325	0.045586	1	0.0807535	0.0389043	0.337141
Klhl29	0.0481399	0.0422462	1	0.0946275	0.0389233	0.337141
Map4k4	-0.16344	7.68267e-05	0.681641	-0.0599914	0.0389329	0.337141
Mtmr12	0.00907654	0.163114	1	0.0883103	0.0390418	0.337141
Ctsl	0.0263997	0.00691987	1	-0.0670131	0.039046	0.337141
Supt6	0.040121	0.000547147	0.824615	0.0751372	0.0390748	0.337141
Svop	0.0794688	1.93294e-05	0.465742	0.065964	0.0390886	0.337141
Camsap2	0.012884	0.130683	1	0.0783705	0.0392235	0.337141
Cd46	0.021202	0.14235	1	-0.203745	0.039235	0.337141
Atf6	0.0932898	2.90235e-07	0.00878891	0.0716255	0.0392489	0.337141
Neto2	0.124165	8.95774e-07	0.0271258	0.101604	0.0392748	0.337141
Aak1	-0.0370718	0.0470549	1	0.0778212	0.0394687	0.337965
Rtl8a	0.0985956	1.91027e-14	5.78469e-10	-0.0893516	0.0394964	0.337965
Nr2c2	0.0168433	0.0191795	1	0.0639402	0.0395094	0.337965
Socs7	0.0508572	0.000116836	0.99912	0.0685712	0.0395116	0.337965
Arhgef7	0.00891215	0.117256	1	0.0611017	0.0397883	0.339614
Nono	-0.0172443	0.665373	1	0.0611216	0.0397979	0.339614
Ptma	-0.0240494	0.629092	1	-0.079442	0.039828	0.339648
Snx13	0.0010314	0.0674797	1	0.0620438	0.0399215	0.340222
Jakmip2	-0.0469631	0.000337288	0.698961	0.0838413	0.0400461	0.341061
Pde4d	-0.0989008	5.73133e-08	0.00173556	0.101879	0.0401804	0.341534
Cdk5r1	0.0731487	4.78334e-07	0.0144849	0.0595669	0.0402885	0.341742
Srp72	0.0295917	0.00275256	1	0.0622046	0.04031	0.341742
Casd1	0.030012	0.000887325	1	0.0674327	0.0406032	0.343159
Chgb	0.128117	2.76389e-17	8.36962e-13	0.0779053	0.0406355	0.343159
Lrrk2	0.0521909	0.0175908	1	0.101692	0.0406669	0.343201
Hap1	0.174861	1.96302e-26	5.94442e-22	0.100876	0.0408549	0.34345
Ncam2	-0.093418	0.0161052	1	0.0912828	0.0409268	0.343611
Rnmt	0.0267157	0.0269204	1	0.0674117	0.0409884	0.343906
Rab15	0.0654074	7.20418e-08	0.00218157	0.0567823	0.0410539	0.344233
Bmp2k	-0.127318	4.66287e-11	1.41201e-06	-0.0922191	0.0411261	0.344617
Itsn2	-0.189716	0.000185331	0.632374	0.0662473	0.0416311	0.347728
Pdcd4	0.0460025	0.00141076	0.82991	0.0748211	0.0417217	0.347866
Mef2a	-0.0880398	0.0148013	1	0.0737102	0.0417343	0.347866
Fkbp2	0.0605391	1.11764e-05	0.338442	-0.0841133	0.0417949	0.347866
Nrip1	-0.0160778	0.427539	1	0.0929293	0.0418091	0.347866
Ppp6r2	0.0528247	7.54766e-05	0.734433	0.062744	0.0418348	0.347866
Supt5	0.0692035	6.763e-08	0.00204797	0.0625432	0.0418617	0.347866
Usp29	0.151666	0.00408188	1	0.0929198	0.0420057	0.348694
Hook1	0.104853	5.45577e-09	0.000165212	0.0908103	0.0420804	0.34891
Dnm1	0.123107	8.70903e-12	2.63727e-07	0.0499931	0.042556	0.351168
Alkbh8	-0.00112105	0.423829	1	0.0834948	0.0426671	0.351639
Jam3	-0.146134	0.000279293	0.675953	-0.0970329	0.0427008	0.351693
Usp33	0.0540806	5.92704e-06	0.179483	0.0705929	0.0428328	0.352334
Hectd1	0.0295662	0.0321448	1	0.0929912	0.0431139	0.353261
Plk5	0.0798599	6.34816e-11	1.92235e-06	0.0967486	0.0432191	0.353261
Rasal2	-0.0680759	0.000171699	1	0.096414	0.043241	0.353261
Plppr2	0.0533564	8.57974e-06	0.259812	0.0730028	0.043281	0.353261
Dok6	0.151508	1.62846e-09	4.93129e-05	0.10149	0.0433659	0.353261
Snx10	0.0536026	0.00435608	0.867799	0.0698406	0.0433982	0.353261
Aff4	-0.0340549	0.158148	1	0.0882922	0.0434532	0.353261
Lin52	-0.0141844	0.687001	1	-0.0916782	0.0434603	0.353261
Ppp1r7	0.0866859	2.18611e-10	6.61998e-06	0.0640607	0.0434887	0.353261
Wdr35	0.0337647	0.00224594	1	0.0747453	0.0436137	0.354055
Shoc2	0.00543222	0.0555197	1	0.0705117	0.0437147	0.354421
Gm42456	0.0455852	0.000942715	1	0.179079	0.0437951	0.354421
Cpne8	0.0522755	7.5444e-05	0.613203	0.125008	0.0438284	0.35447
Cbx5	0.0241231	0.0226418	1	0.0622385	0.0440945	0.355421
Zcchc14	0.0491444	0.00118966	0.845717	0.0804106	0.0441252	0.355421
Neurl1a	0.0676753	2.434e-05	0.255061	0.0858309	0.0441372	0.355421
B830012L14Rik	0.160942	2.05929e-11	6.23594e-07	-0.624021	0.0443557
Tyro3	0.066047	4.1386e-08	0.00125325	0.0567299	0.0443666	0.356691
Gnaq	-0.161898	1.89915e-15	5.751e-11	0.0563006	0.0443772	0.356691
Lmbrd2	0.0204373	0.194504	1	0.0716444	0.0445397	0.357294
Frmd5	-0.542313	1.87996e-39	5.69289e-35	-0.0806541	0.0446324	0.357636
Psmd2	0.0768796	6.77444e-10	2.05144e-05	0.0531091	0.044767	0.358495
Ldb2	0.075591	9.32497e-06	0.282379	0.098823	0.0448005	0.358541
Atp6v1c1	0.0167402	0.0359913	1	0.0540219	0.0449025	0.358628
Rab3gap1	0.0542572	0.000862364	1	0.0596133	0.0449419	0.358628
Erich3	0.0304056	0.00169168	1	0.0998269	0.0449603	0.358628
Fam110b	0.126946	1.50151e-12	4.54687e-08	0.0765631	0.045018	0.358737
Pdzrn4	0.137082	0.0093981	1	0.157032	0.0450509	0.358779
Tmod2	-0.156578	0.00147796	0.986952	0.0798319	0.0451396	0.359046
Hp1bp3	0.0190672	0.00575217	1	0.0576039	0.0451726	0.359089
Atxn7l1	0.0101496	0.121626	1	0.0920199	0.0452314	0.359135
Ube2d1	-0.0476518	0.645525	1	-0.0804289	0.0454628	0.360734
Ttc7b	0.0681424	0.000252722	0.873235	0.0619518	0.045592	0.361319
Clvs2	0.0437604	0.00849328	0.994844	0.085501	0.0458012	0.362552
Fam120c	0.0100454	0.0296415	1	0.0892101	0.0458182	0.362552
Trim9	0.0505419	0.100613	1	0.0741595	0.0459445	0.363006
Rab8b	0.031469	0.0215472	1	0.0732524	0.0461674	0.364103
Hnrnpul1	0.00507312	0.196839	1	0.055279	0.0462231	0.364113
Scyl3	0.0131189	0.170038	1	0.080581	0.0463808	0.364113
Selenom	0.0289554	0.00367322	1	-0.0895746	0.0464183	0.364113
Shisa9	0.183653	5.54076e-17	1.67785e-12	0.0661681	0.0465215	0.364113
Zfp148	-0.0495918	0.0196584	1	0.0652985	0.0465786	0.364113
Mat2b	0.0169546	0.0986665	1	0.0650318	0.0465945	0.364113
Gspt1	-0.0180526	0.736982	1	0.0673734	0.0467409	0.364209
Aven	-0.0213071	0.514707	1	-0.137864	0.0469229	0.36519
Ppp1r10	-0.0812701	0.0370546	1	0.0740254	0.0470034	0.365598
Ppme1	0.0664459	1.94918e-05	0.385027	0.0591742	0.0472016	0.366426
Rnf220	-0.640835	7.87848e-33	2.38576e-28	-0.0529696	0.047284	0.36651
Prkcg	0.0889887	2.7465e-10	8.31694e-06	0.0803814	0.0472898	0.36651
Rps27	0.0724	6.07469e-08	0.00183954	-0.0609044	0.0473769	0.366578
Hdx	-0.00844742	0.58195	1	0.160345	0.0473832	0.366578
Atrnl1	0.00944904	0.571398	1	0.0697146	0.0477123	0.367871
Brinp2	0.0217065	0.0204681	1	0.0853369	0.0477155	0.367871
Lrrc7	0.25051	2.92554e-34	8.85913e-30	0.189173	0.0477233	0.367871
Ift172	0.0475176	5.48871e-05	0.56404	0.0638824	0.0480599	0.368674
Tmem30a	0.0404508	0.000354275	0.800456	0.0639818	0.0481275	0.368826
Baz1a	0.0320011	0.00577178	1	-0.139896	0.0482871	0.369397
Slc16a2	0.0506624	0.00100698	0.800129	0.092079	0.0483722	0.36983
Scg2	0.183071	3.30219e-20	9.99969e-16	0.0805397	0.0485565	0.370803
Fam169a	0.0425755	0.00261705	1	0.0689687	0.0486426	0.370917
Med14	0.0350638	0.0153376	1	0.0712463	0.0488209	0.371086
Ppp1cb	0.0619469	0.000176206	0.376582	0.0600736	0.048885	0.371086
Nceh1	0.030426	0.0113777	1	0.0610133	0.0488944	0.371086
Cwc22	0.0133301	0.197696	1	0.0941173	0.0489075	0.371086
Samd4	-0.137428	6.41311e-06	0.194202	-0.098226	0.0490941	0.372068
Zfp410	0.00665599	0.339596	1	-0.107019	0.0491607	0.372274
Lzts3	0.186112	3.6048e-27	1.09161e-22	0.0631394	0.0491786	0.372274
Rpsa	0.0795678	1.88806e-08	0.000571742	-0.051012	0.0493437	0.372873
Sptbn2	0.188863	7.49797e-21	2.27054e-16	0.0893647	0.0496198	0.374525
Gm40841	2.28901e-06	0.5777	1	-0.158568	0.0498224	0.375835
Top1	0.000975626	0.591422	1	0.0617654	0.0501617	0.377634
Arhgap20	0.139737	2.45874e-12	7.44557e-08	0.0736449	0.050358	0.378471
Epb41l3	-0.0960096	3.97796e-05	0.410654	-0.0728908	0.0504904	0.379115
Zfp407	-0.0397381	0.238435	1	0.0891197	0.0509809	0.381497
Cntnap5c	-0.0636229	0.0860472	1	0.222947	0.0511402	0.38179
Ncdn	0.188852	8.54698e-30	2.5882e-25	0.0588209	0.0511911	0.381903
Prmt8	0.0696414	0.000102056	0.804166	0.0672765	0.0512865	0.381905
Gtf3c1	0.0751666	5.35084e-07	0.0162034	0.0655283	0.0513007	0.381905
Mthfsl	-0.00394957	0.628167	1	-0.172498	0.0513024	0.381905
Ksr2	0.068118	0.00852721	1	0.103399	0.0514683	0.382458
Acvr1b	0.0290412	0.00322904	1	0.0619693	0.0516306	0.382458
Scrn1	0.0881064	1.88383e-06	0.057046	0.0543303	0.0516314	0.382458
Trim46	0.0750095	9.5636e-06	0.289605	0.0728553	0.0517336	0.382923
Pgrmc1	0.088876	5.71155e-11	1.72957e-06	0.0599584	0.0519417	0.383407
Pias2	-0.0389368	0.015812	1	0.069335	0.0520714	0.383407
Zfp81	0.0169732	0.0336809	1	0.102261	0.0520865	0.383407
Clasrp	0.00196105	0.00574099	1	-0.102772	0.0521205	0.383407
Auh	-0.0389001	0.0975799	1	-0.0766688	0.0521493	0.383407
9930021J03Rik	-0.000337597	0.0775311	1	0.0729073	0.0521528	0.383407
Rpgr	0.0841355	2.47415e-06	0.0749223	0.0873436	0.0524525	0.385356
Fbxl2	0.104296	6.7093e-09	0.000203171	0.0756951	0.0528773	0.386772
Pkd2	-0.0211263	0.582502	1	0.0705387	0.0528861	0.386772
Mprip	0.103123	2.77968e-07	0.00841743	0.0670645	0.0529079	0.386772
Dhx15	0.0393591	0.0434036	1	0.0629874	0.0529849	0.387117
Atp2c1	-0.0429269	0.00156384	0.807819	0.0534054	0.0530481	0.387161
Ndufb10	0.0496139	5.15724e-05	0.380497	-0.0676428	0.05316	0.387161
Usf3	0.00417505	0.165623	1	0.0980672	0.0533441	0.387781
Atp5o	0.0698855	0.000383093	0.735645	-0.059844	0.0534927	0.387994
Sesn3	0.128623	4.26012e-12	1.29005e-07	0.0833253	0.0535923	0.388203
Rps8	0.0555337	1.66943e-06	0.0505537	-0.0629918	0.0536197	0.388203
Vps39	0.0143523	0.0368398	1	0.0611807	0.0537422	0.388719
Dnaaf9	-0.126018	7.62803e-08	0.00230992	-0.0718295	0.0538259	0.388879
Myo6	-0.268454	5.64477e-20	1.70935e-15	-0.0778793	0.0538266	0.388879
Dgcr8	0.0217329	0.00945497	1	0.0756012	0.053854	0.388879
Adam22	-0.0457459	0.017165	1	0.069486	0.0540034	0.389742
Hnrnpll	0.0569619	0.000576489	0.860664	0.0727528	0.0540486	0.389852
Ubash3b	-0.235715	7.68256e-16	2.32643e-11	-0.112329	0.0541311	0.39023
Dab1	0.0725533	1.90277e-06	0.0576196	0.0705714	0.0542658	0.390984
Pcsk1n	0.223425	3.89356e-26	1.17905e-21	-0.0730032	0.0543807	0.391167
Zfp329	0.00124095	0.62958	1	0.0733807	0.0544114	0.391167
Usp11	0.0903017	1.46169e-10	4.42629e-06	0.0682485	0.0546242	0.392263
Csnk1a1	-0.0345758	0.0952197	1	0.0528899	0.0547647	0.392838
Cpne5	0.177586	3.15524e-22	9.55469e-18	0.0683049	0.0549324	0.3931
Crtc3	-0.00851332	0.747562	1	-0.0856862	0.0549498	0.3931
Rsrp1	-0.162938	2.98944e-13	9.05264e-09	-0.0961278	0.0550203	0.3931
Ap2b1	0.075731	1.18212e-06	0.0357968	0.0579672	0.055021	0.3931
Brms1l	0.00952638	0.183543	1	0.0670076	0.0550417	0.3931
Bpnt2	0.024885	0.0231779	1	0.0668947	0.0550447	0.3931
Ppp2r5e	-0.0196252	0.584165	1	0.0649447	0.0550985	0.3931
Diaph1	0.0299701	0.0373735	1	0.0785141	0.055164	0.3931
Kcnq1ot1	-0.144553	2.83486e-11	8.58453e-07	-0.176771	0.0553046	0.393464
Actn1	0.305745	1.84578e-43	5.58938e-39	0.07181	0.0553058	0.393464
Ptms	0.143257	4.0103e-22	1.2144e-17	-0.0618484	0.055597	0.393986
Camkk2	0.135392	4.45558e-14	1.34924e-09	0.0693127	0.0557807	0.394684
Car12	0.122546	3.16175e-11	9.57443e-07	0.104448	0.0559379	0.395365
Large1	-0.0730623	0.107959	1	0.0566759	0.056054	0.395541
Zfand5	-0.0233428	0.789691	1	0.0596171	0.0562616	0.396229
Myo3b	0.0184454	0.0634835	1	0.143162	0.0563208	0.396229
Cisd1	0.00793024	0.0618025	1	-0.0641659	0.0563343	0.396229
Osbpl8	0.143506	1.17992e-15	3.57303e-11	0.0968859	0.0563743	0.396296
Eml4	-0.00421166	0.256579	1	0.080466	0.0564613	0.396693
Clvs1	-0.0498739	0.0507297	1	0.0980975	0.056837	0.398687
Gpx4	0.071629	2.74901e-10	8.32454e-06	-0.0622632	0.0572864	0.400534
Dlc1	-0.0950845	0.0424184	1	-0.0656547	0.0573683	0.400534
Dennd4a	-0.0720068	0.282517	1	0.0783604	0.0573776	0.400534
Rnf130	-0.135923	0.00021892	0.630662	0.0616113	0.0574442	0.400784
Rap1gap2	0.0378259	0.0189482	1	0.0741491	0.0575021	0.400842
Ano3	0.243044	4.95597e-20	1.50077e-15	0.0895822	0.0576154	0.401333
Arhgap33	0.145651	3.04885e-19	9.23251e-15	0.0745385	0.0578011	0.401766
Pum2	-0.0174594	0.504928	1	0.0647894	0.0581338	0.40307
Mtmr3	-0.0130766	0.240135	1	0.066271	0.0582429	0.403327
Plxna2	0.102121	1.84634e-09	5.59107e-05	0.103159	0.0583271	0.403481
Crk	0.00651543	0.224137	1	0.0564821	0.0587221	0.40535
Ptprr	0.0279307	0.0555718	1	0.0886058	0.0589129	0.406021
Mok	0.0438295	0.0357414	0.962597	0.116666	0.0590703	0.40646
Cntnap5b	0.205262	7.09349e-20	2.14805e-15	0.146315	0.0591762	0.406973
Kcnh7	-0.0132938	0.264909	1	0.106414	0.0593187	0.407738
Prkag2	0.110475	2.51224e-09	7.60756e-05	0.0669484	0.05953	0.408791
Rap1gap	0.239203	1.62911e-28	4.93327e-24	0.063753	0.0596541	0.409002
Cox4i1	0.188766	5.56884e-18	1.68636e-13	-0.0538823	0.0596709	0.409002
Med1	0.0112553	0.0769547	1	0.0739721	0.0597011	0.409002
Cyth1	-0.139497	6.12747e-06	0.185552	-0.0743881	0.0597228	0.409002
Gnl3l	0.0308	0.00712257	1	0.0518301	0.0597661	0.409041
Tulp3	0.0110436	0.0910567	1	-0.108883	0.0598557	0.409266
Rbm10	0.0381749	6.30583e-05	0.500668	0.0755781	0.0599895	0.409854
Tnik	0.0881182	8.34808e-08	0.00252797	0.0795306	0.0600048	0.409854
Rnf217	0.0309395	0.00766272	1	0.102328	0.0601358	0.410463
Manf	0.0111343	0.224531	1	-0.0831829	0.0602202	0.410679
Dbn1	0.160395	2.91067e-23	8.8141e-19	0.0550626	0.0604048	0.411574
Rab11fip4	0.0237758	0.0727145	1	0.0572113	0.0606548	0.412561
Lpin2	0.0174119	0.0609573	1	0.0715494	0.0607974	0.413163
Fez1	-0.0534269	0.19525	1	-0.0571555	0.0608069	0.413163
Rgs17	0.101435	6.45464e-08	0.00195459	0.0912231	0.0608776	0.413427
Grm3	-0.179272	2.35111e-05	0.400027	0.0613232	0.0609214	0.413509
Kif3a	-0.00788066	0.138017	1	0.0579583	0.0610502	0.413951
Fkbp15	-0.012553	0.738517	1	0.0647589	0.0610996	0.41407
Prkce	0.0930554	1.96569e-08	0.00059525	0.0552037	0.0613605	0.415294
Kif13a	-0.258471	1.99821e-11	6.05097e-07	-0.0834711	0.0613761	0.415294
Vcpip1	0.00893884	0.396189	1	0.0699709	0.0614125	0.415325
Tpm1	0.144758	1.65695e-13	5.01759e-09	0.0699779	0.0621439	0.418314
Zfp536	-0.600685	2.54113e-65	7.69506e-61	-0.0928714	0.0622492	0.418627
Zfp40	0.0071354	0.152811	1	0.10981	0.0624007	0.419257
Galnt16	0.0183211	0.0642532	1	0.0645257	0.0629425	0.421193
Chn1	0.0780897	0.00503513	1	0.0508172	0.0629685	0.421193
Stard7	0.0154391	0.0914595	1	0.0573258	0.0630209	0.421193
Vps53	0.0243857	0.0209051	1	0.0598672	0.0632207	0.421202
Trnp1	0.0376412	0.00204561	0.986612	-0.058982	0.0637071	0.422581
Qtrt2	0.0293027	0.00501954	1	0.107601	0.0637497	0.422581
Xpot	0.00258078	0.663777	1	0.0624964	0.0637852	0.422581
Adamts3	0.150701	7.63379e-10	2.31166e-05	0.11003	0.0642359	0.423625
Pum1	0.0345717	0.0112991	1	0.0655126	0.0643501	0.42394
Cstf2	0.0576446	8.11872e-06	0.245851	0.0549999	0.0644946	0.42394
9630013A20Rik	0.0064083	3.35694e-05	0.721856	-0.133341	0.0652172	0.425992
Cep295	-0.0129638	0.844331	1	0.0931306	0.0653131	0.42619
Plekha5	0.108482	6.12286e-11	1.85412e-06	0.0683956	0.0653694	0.426344
Cox8a	0.256016	4.21847e-37	1.27744e-32	-0.0561896	0.0657839	0.427668
Mpp7	0.043438	0.000697724	0.650934	-0.121581	0.0661712	0.428686
Rpl18	0.0231882	0.00832491	1	-0.0561147	0.0662494	0.428857
Ints10	0.0219066	0.0487587	1	0.0681668	0.0663926	0.429162
Hnrnpa3	0.0406759	0.000722907	1	0.0531603	0.0666414	0.430233
Cnnm1	0.0649229	1.17936e-05	0.357135	0.0614295	0.0667037	0.430233
Etv5	0.022836	0.0688464	1	0.0941454	0.0667573	0.430233
Trmt6	0.0103107	0.242646	1	0.0751424	0.0667597	0.430233
Rbm6	-0.0566346	0.00457238	1	0.0704895	0.0668509	0.430394
Ndufb9	0.0586793	3.6995e-06	0.112028	-0.0609685	0.0670567	0.431355
Rasa2	0.00763202	0.360539	1	0.0902118	0.0670665	0.431355
Mfsd6	-0.0469054	0.0169799	1	0.0546623	0.0673234	0.432739
Csad	0.0081655	0.122998	1	-0.0918065	0.067375	0.432739
Rnf103	0.0481071	1.59825e-05	0.483982	0.0587258	0.067477	0.432739
Bhlhb9	0.133125	8.33108e-18	2.52282e-13	0.0659887	0.0674801	0.432739
Chpt1	0.0131885	0.395518	1	-0.0735327	0.0674814	0.432739
Sik3	-0.226532	1.33801e-15	4.05176e-11	0.0666309	0.0677186	0.4333
Rplp1	0.182933	1.88944e-23	5.7216e-19	-0.0516811	0.0677482	0.4333
Rbm26	-0.055989	0.0041376	1	0.0692262	0.0678585	0.433661
Rcan1	0.0179756	0.13282	1	0.0616241	0.0680736	0.434291
Slc7a8	-0.00510718	0.528487	1	0.0686505	0.068171	0.434291
Rasa1	-0.0151083	0.302434	1	0.0690769	0.0684436	0.435064
Dstyk	-0.00126588	0.254695	1	0.0709028	0.0685146	0.435064
Parp1	0.0368056	0.00123219	1	0.0610935	0.0685154	0.435064
Ilf3	0.0469029	0.00013832	0.958304	0.0560178	0.0685798	0.435064
Elovl6	-0.0391225	0.259629	1	-0.0595791	0.0692383	0.437598
Sos1	0.0108252	0.214444	1	0.0782628	0.0698129	0.440019
Ehbp1	-0.0684301	3.64089e-05	0.427183	0.0669293	0.0698475	0.440019
Kif3b	-0.0176286	0.392116	1	0.0631022	0.0700948	0.440378
Zfp326	-0.015787	0.645807	1	0.088397	0.0707021	0.441845
Zfp831	0.0692357	2.17828e-09	6.59628e-05	0.107843	0.0708189	0.442001
Abcb7	-0.0188854	0.834495	1	0.0687316	0.070829	0.442001
Glp2r	0.0683754	4.28148e-06	0.129652	-0.537394	0.0713006
Galntl6	-0.0558251	5.52406e-06	0.167279	-0.0938518	0.0713211	0.443582
Ahctf1	0.0438442	0.00073957	0.63243	0.0837054	0.0713995	0.443858
Atxn3	0.00596298	0.482484	1	0.076786	0.0718242	0.445367
Nlk	-0.0297551	0.120055	1	0.0617898	0.0718253	0.445367
Phka2	0.0114458	0.0841808	1	0.0967517	0.0718786	0.445367
Heatr5b	0.0887505	3.15984e-05	0.485265	0.0971114	0.072011	0.445548
Cdh4	0.153866	2.64448e-07	0.00800802	0.111221	0.0720482	0.445548
Gm26901	0.00763664	0.429886	1	0.399035	0.0722275
Dgat2	0.0877594	2.78572e-12	8.43573e-08	0.0583483	0.0722344	0.445896
Edem3	0.0326552	0.0275862	1	0.0676606	0.0722417	0.445896
Afdn	-0.045715	0.00954505	1	0.0679766	0.0724305	0.446638
Slmap	-0.0142127	0.385323	1	0.0738588	0.0725974	0.447051
G2e3	-0.0109656	0.743355	1	0.0986464	0.0727283	0.447051
Uqcr10	0.0484391	3.276e-06	0.0992039	-0.0612608	0.0727673	0.447051
Aig1	-0.181929	3.34862e-14	1.01403e-09	-0.0904567	0.0727911	0.447051
Zdhhc1	0.02896	0.0134278	1	-0.0796378	0.0728009	0.447051
Tmem68	0.0147256	0.0825272	1	0.0772702	0.0728412	0.447051
Dlgap4	0.116465	8.21785e-10	2.48853e-05	0.0511988	0.0730307	0.448002
Hmg20a	0.0470299	0.000347715	1	0.0549503	0.0731674	0.448206
Etv1	-0.0333242	0.442312	1	-0.0730053	0.0732547	0.44853
Rapgef6	-0.0215972	0.350104	1	0.0894766	0.0735023	0.4492
Kif3c	-0.00770209	0.476527	1	0.0461203	0.0736451	0.449597
Asap1	-0.149356	4.32201e-16	1.30879e-11	0.0629569	0.0738216	0.449808
Mapre2	-0.0163011	0.396307	1	0.0487108	0.0738396	0.449808
Syt11	0.0282565	0.00129228	1	-0.043187	0.073844	0.449808
Ptchd4	0.0100756	0.00585015	0.887677	0.229168	0.0738798	0.449816
Dchs2	0.0779716	1.08977e-05	0.330004	0.17785	0.0741697	0.451203
Cystm1	0.0420781	0.00735194	1	-0.0832872	0.074177	0.451203
Actr2	0.0216932	0.0117624	1	0.0516068	0.0743912	0.451875
Arhgef17	0.0602249	3.30033e-06	0.0999407	0.067486	0.0747226	0.453039
Dgkz	0.0818073	6.9782e-09	0.000211314	0.0741347	0.0749019	0.453663
Rpgrip1l	-0.0169533	0.676508	1	0.0829838	0.0749923	0.453772
Zfhx4	0.102223	3.34025e-08	0.00101149	0.123236	0.0751048	0.453851
Cdyl2	0.049788	0.00123593	0.874986	0.140418	0.0752722	0.453851
Bbs9	-0.0127156	0.225914	1	0.0801551	0.0753307	0.453851
Ccny	0.00861156	0.117472	1	0.0534754	0.0753491	0.453851
Pcnx2	0.0534639	0.00273813	0.829909	0.0713349	0.0753657	0.453851
Nucb2	0.0377565	0.00337496	0.870884	0.0767978	0.075474	0.453851
Rps11	0.0530124	6.56109e-06	0.198683	-0.0489198	0.0755335	0.453851
Styx	-0.0157217	0.488893	1	0.119056	0.0755844	0.453851
Herc3	0.0252839	0.0920324	1	0.0603243	0.0756353	0.453851
Snw1	0.00109584	0.541719	1	0.0595168	0.0756685	0.453851
Extl3	0.0089687	0.190852	1	0.0527588	0.0757578	0.454023
Crbn	0.00193418	0.498136	1	0.0606828	0.0760566	0.455185
Frmd4b	-0.2897	2.41911e-16	7.32555e-12	-0.0679462	0.0767252	0.456775
Ulk2	0.0546227	0.000163507	0.907288	0.0572489	0.0771226	0.4584
Tro	0.109049	2.83064e-12	8.57174e-08	0.0790105	0.0772123	0.458425
Smap2	0.0311286	0.00102611	1	0.0469257	0.0773595	0.45876
Laptm4a	-0.00127384	0.552867	1	-0.0479623	0.077433	0.458777
Pde10a	0.347276	1.0348e-36	3.13358e-32	0.0988681	0.0775744	0.459406
St3gal5	0.0833432	1.60296e-08	0.000485408	0.0473571	0.0778089	0.459957
Nipal3	0.0393305	3.18548e-05	0.573426	0.0592567	0.0780955	0.461232
Dhx57	0.0129887	0.225067	1	0.0657231	0.0782245	0.461696
Ptpn9	0.020613	0.0704644	1	0.0808532	0.0782918	0.461696
Ptprn	0.335384	1.09333e-47	3.31081e-43	0.0466842	0.0782988	0.461696
Aatk	-0.162436	4.8665e-05	0.533922	-0.0480431	0.0783993	0.461977
Epha6	0.195169	8.85039e-19	2.68007e-14	0.135657	0.0785005	0.462038
Fam214a	-0.0420329	0.675763	1	0.0951899	0.0785679	0.462132
Lingo2	0.307121	6.93708e-05	0.614442	0.100039	0.0788248	0.463225
Mllt10	-0.0127402	0.673264	1	0.0754949	0.0788681	0.46327
Ssr4	0.0464547	0.000328637	0.801124	-0.0721058	0.0790146	0.463471
Pafah1b1	-0.0864551	0.00283581	1	0.044459	0.0790805	0.463471
Kpna4	-0.0609953	0.385622	1	0.0575932	0.0791925	0.463509
Cstf3	0.0975124	1.02492e-08	0.000310365	0.0744202	0.0791939	0.463509
Gab2	-0.154208	0.000702017	1	-0.0856864	0.0792575	0.463526
Usp54	-0.297672	3.01088e-17	9.11755e-13	-0.0631531	0.0793776	0.463526
Neto1	0.148864	2.62496e-11	7.94889e-07	0.0767818	0.0794108	0.463526
Bcl11b	0.168109	6.10881e-11	1.84987e-06	0.0649451	0.0795179	0.463735
Cdc27	0.02486	0.0392646	1	0.0693909	0.0798031	0.464668
Ankfy1	0.00814165	0.509282	1	0.0591499	0.0799349	0.464668
Phtf1	0.0392285	0.000913475	1	0.0674644	0.0799637	0.464668
Ankle2	0.00885535	0.246949	1	0.0641571	0.0802202	0.465743
Ddx5	0.332403	1.04787e-66	3.17315e-62	0.0501345	0.080383	0.466479
Phlpp2	0.0149995	0.176012	1	0.0814978	0.080543	0.466783
Sptbn4	0.187625	4.48663e-16	1.35864e-11	0.0530721	0.0806601	0.46714
Zfp398	-0.0101372	0.671569	1	0.0790614	0.0808071	0.467332
Nbas	-0.320388	5.45343e-13	1.65141e-08	-0.07237	0.0808174	0.467332
Ryr3	0.199788	8.9346e-22	2.70558e-17	0.0822266	0.080992	0.468133
Gm47591	0.0787887	8.67122e-08	0.00262582	0.780868	0.0810718
Syt6	0.118327	3.65681e-07	0.0110736	0.0688951	0.081261	0.469271
Gm44593	0.191317	1.9768e-16	5.98614e-12	0.146815	0.0817244	0.47132
Fbxo41	0.0673122	5.88847e-06	0.178315	0.0646184	0.0819826	0.471972
Ppargc1a	0.00708747	0.290275	1	-0.080544	0.0824019	0.47292
Prkab2	0.0235346	0.0405773	1	0.0695525	0.0828996	0.474145
Stk4	0.013117	0.302563	1	0.0657744	0.0830699	0.474145
Speg	0.178634	2.32087e-21	7.02807e-17	0.0509165	0.0831564	0.474145
Atp5d	0.086612	1.02098e-08	0.000309173	-0.0545863	0.0831601	0.474145
Gba2	0.106043	1.96499e-13	5.95037e-09	0.0585091	0.0831622	0.474145
Adar	0.109249	8.22919e-09	0.000249196	0.0550511	0.0832975	0.474473
Madd	0.0779518	1.33724e-07	0.00404943	0.0534049	0.0833939	0.474505
Sec61a2	-0.0110934	0.548994	1	0.0770343	0.083463	0.474505
Celf1	0.065044	0.00465859	1	0.0572326	0.0835061	0.474505
Robo1	0.141594	9.26274e-14	2.80494e-09	0.085644	0.0835537	0.474505
Pnpla8	0.00420834	0.0635128	1	0.0561192	0.0837609	0.474616
Cep85l	-0.0154877	0.180901	1	0.0853064	0.0837923	0.474616
Peli2	0.0306763	0.0291811	1	0.0613096	0.0839642	0.47534
Ubr3	0.00522109	0.80067	1	0.0755745	0.0840766	0.475399
Atf2	0.0358559	0.356115	1	0.0562477	0.0841507	0.475404
Slc6a6	0.0454221	0.000484479	1	0.0731078	0.0847194	0.477004
Camk1d	0.202991	2.54592e-24	7.70956e-20	0.0648009	0.0848321	0.477168
Gnl3	0.0221354	0.00972813	1	-0.0862482	0.0848665	0.477168
Nfx1	0.0620193	0.000101947	0.588786	0.053778	0.0856667	0.480007
Prpf4b	-0.0464146	0.117764	1	0.0615788	0.0858004	0.480194
Adam10	-0.094718	0.0546926	1	0.0685651	0.0859005	0.480194
Cx3cl1	0.189767	4.77955e-25	1.44734e-20	0.0461999	0.0859956	0.480194
Lgi1	0.132295	5.17789e-15	1.56797e-10	0.0564541	0.0860884	0.480382
Cox7a2	0.11999	1.16747e-15	3.53534e-11	-0.0536599	0.08614	0.480382
Epha4	0.0955968	4.15101e-07	0.0125701	0.0602856	0.0869289	0.483084
Ppp2r2c	0.117398	5.61782e-11	1.70119e-06	0.0524103	0.0869385	0.483084
Cebpz	0.00455056	0.124275	1	0.0661736	0.0869589	0.483084
Atp5j	0.0919502	4.13003e-09	0.000125066	-0.0614623	0.0872112	0.483771
Mysm1	-0.0087997	0.527656	1	0.0696571	0.0872956	0.483771
Cnot6	0.0105711	0.292707	1	0.0546352	0.0872994	0.483771
Snx27	0.0328199	0.0044814	1	0.0522855	0.0876347	0.484355
Atp6v0a1	0.0560521	0.111098	1	0.0503968	0.0876718	0.484355
Fubp1	-0.00146299	0.591674	1	0.060631	0.0881071	0.486221
6330403K07Rik	0.113661	8.98702e-17	2.72145e-12	0.0527428	0.0882466	0.486221
Rcor1	0.0350989	0.00871135	1	0.0707645	0.0886643	0.487766
Ttc39c	0.00494044	0.287891	1	0.079096	0.0887151	0.487839
Ndufb8	0.0680003	7.78616e-08	0.00235781	-0.072343	0.0889584	0.488351
Armcx3	0.0409147	0.00119089	0.856307	0.0576749	0.0892849	0.489524
Rps26	0.0346901	0.00176858	1	-0.0544265	0.0894152	0.489825
3110056K07Rik	0.0105081	0.184358	1	0.145505	0.0895855	0.490096
Fnip1	-0.0533417	0.133689	1	0.0587395	0.0896154	0.490096
Pgap1	0.0314996	0.00501777	1	0.086644	0.0898479	0.490542
Zfp280d	0.0109347	0.561992	1	0.0706715	0.090043	0.490989
Arl15	0.0163757	0.361809	1	0.0690662	0.0902954	0.491336
Cep78	-0.00472685	0.61734	1	0.105047	0.0904903	0.491984
Papss1	-0.00223544	0.452587	1	-0.0563485	0.0906228	0.492293
Gm16168	-0.398522	1.17996e-31	3.57317e-27	-0.291038	0.0908251
Zfp638	-0.0919391	0.000360403	0.923727	0.0555112	0.0908404	0.492858
Atp5l	0.0619854	1.6504e-08	0.000499773	-0.0819753	0.0910951	0.492963
Dnajc5	0.00979163	0.202306	1	0.0457696	0.091496	0.493737
Arntl	0.0640373	0.00182769	0.609251	0.0989543	0.0915783	0.493908
Zc2hc1a	0.0259273	0.0684387	1	0.0587673	0.0921378	0.496265
Setx	0.00553262	0.0385499	1	0.0885344	0.0922899	0.496373
Erlin1	0.091023	3.95303e-08	0.00119706	0.0700781	0.0924307	0.496644
Ptprs	0.134098	2.21231e-08	0.000669931	0.0630514	0.0929369	0.497597
D630045J12Rik	0.0160893	0.0803257	1	0.0884105	0.0929422	0.497597
Fgd4	0.0118149	0.381975	1	0.103685	0.0930205	0.497597
Map6	0.0460733	0.00113831	1	0.0506477	0.0930382	0.497597
Sub1	0.037753	0.00185016	1	0.0534114	0.0931019	0.497635
Ppp4r3b	-0.00720554	0.294606	1	0.0627991	0.0932133	0.497635
Ckb	0.43173	2.51422e-56	7.61355e-52	-0.0547145	0.093297	0.497877
Rnf207	0.0398092	0.00281003	1	-0.127869	0.0934493	0.497947
Celf3	0.173292	1.28538e-30	3.89239e-26	0.0636388	0.0934632	0.497947
Rpl38	0.119647	1.72643e-17	5.22799e-13	-0.0688006	0.0938621	0.49905
Zc3h12c	0.114646	9.83481e-07	0.0297818	0.10436	0.0941522	0.499674
Abi2	0.0722044	0.00473049	1	0.0496421	0.09433	0.500311
Pip4p1	-0.00402182	0.376796	1	-0.0538019	0.0944238	0.500472
Clpp	-0.00106867	0.803349	1	-0.0645558	0.0944374	0.500472
Zfp799	-0.0194523	0.399891	1	0.0772339	0.0946054	0.500747
N4bp2l1	0.0200624	0.250146	1	0.0785789	0.0947388	0.500747
Vamp4	0.0319444	0.00296722	1	0.0577127	0.0947418	0.500747
Cacul1	-0.00207821	0.438864	1	0.0582602	0.0947925	0.500747
Spopl	-0.0405837	0.233182	1	0.0753144	0.0947973	0.500747
Etl4	-0.15721	8.25255e-06	0.249904	0.0836865	0.0948782	0.500767
Fam184a	0.0160494	0.275258	1	0.0744184	0.0952339	0.501863
Ccdc85a	0.0814198	0.000228483	0.803514	0.0772722	0.0954266	0.502085
Strip2	0.141647	1.28438e-13	3.88937e-09	0.156094	0.0955139	0.502085
Gm1976	0.0353972	0.0230218	1	0.0707763	0.0961525	0.503407
Ppa2	0.0416734	0.000410466	0.87578	-0.0687718	0.0962346	0.503455
Abca2	-0.0936174	0.676168	1	-0.0684978	0.0962907	0.503455
Cdh7	0.124587	6.93176e-12	2.09908e-07	0.0774931	0.0964557	0.50398
Myo9a	-0.0179064	0.719473	1	0.0806766	0.0966133	0.504516
Ccser2	-0.0235399	0.674497	1	0.056869	0.0969433	0.50524
Sbno1	0.058507	2.70853e-06	0.0820196	0.0531234	0.0970245	0.50524
Rnf145	0.024229	0.0296693	1	0.0539992	0.0970432	0.50524
Unc13b	-0.0165741	0.583398	1	0.108859	0.0971781	0.50524
Spag9	-0.109541	1.38472e-07	0.00419322	0.0561525	0.0972288	0.50524
Thada	0.00322299	0.141465	1	0.105906	0.0972408	0.50524
Hdac3	0.0324451	0.0101993	1	-0.055232	0.09772	0.506718
Samd5	0.0791584	0.000376269	0.640941	-0.0789758	0.0979152	0.507326
Itfg1	0.0257007	0.00270459	1	0.0501568	0.0979929	0.507526
Ap2a2	0.0509338	3.53531e-05	0.472854	0.0535789	0.0982926	0.508471
Tnr	-0.0949019	0.00135916	1	0.0892072	0.0987565	0.509756
Gsk3b	-0.0145051	0.0911989	1	0.0597381	0.099527	0.51241
Iqcb1	0.0221869	0.0565064	1	0.0710087	0.0997632	0.51283
Cxxc4	0.0481191	0.000229238	0.713024	0.0733494	0.0997754	0.51283
Phka1	-0.0474386	0.00471161	1	-0.0890867	0.0998185	0.51283
Mme	0.0385151	0.00311529	1	0.105318	0.100202	0.51294
Dock3	0.103182	2.08589e-09	6.31649e-05	0.0759224	0.100255	0.51294
Crebrf	-0.00665109	0.128351	1	0.0539325	0.100461	0.513155
Atp6v1b2	0.0989126	3.09031e-10	9.35807e-06	0.0419975	0.100609	0.513389
Dnajb14	0.046551	0.000565772	0.945352	0.0585788	0.100652	0.513389
Dnajc13	-0.0179562	0.369795	1	0.0616946	0.100722	0.513483
Ankmy2	0.0272201	0.0140781	1	0.0551673	0.100791	0.513559
Magi3	0.0494304	0.00139429	1	0.0715333	0.100816	0.513559
Pibf1	0.0139291	0.13154	1	0.0987242	0.100951	0.513812
Gtf2ird1	0.0857722	9.80557e-07	0.0296932	0.0679272	0.100973	0.513812
Ncbp1	0.0226381	0.0307094	1	0.0568833	0.101066	0.513994
Lrch2	0.0278597	0.119971	1	0.067439	0.101099	0.513994
Zcrb1	0.0117821	0.165581	1	-0.0712019	0.101283	0.514325
Ddrgk1	0.0153253	0.00572343	1	-0.0597878	0.101404	0.514511
Prdx1	-0.0525323	0.302125	1	-0.0509977	0.101518	0.514511
Tmtc1	0.113523	3.41392e-08	0.0010338	0.0776377	0.10171	0.514746
Jph4	0.167986	5.53587e-20	1.67637e-15	0.0463751	0.101722	0.514746
Tbce	0.0167803	0.0391319	1	-0.0709023	0.102088	0.515125
Cul2	0.0185948	0.0140329	1	0.0558684	0.102129	0.515125
Msmo1	0.0260634	0.0461269	1	-0.0764832	0.102218	0.515125
Ptcd3	0.0312425	0.0104076	1	0.0643467	0.102246	0.515125
Oxct1	-0.00983017	0.658071	1	0.0434867	0.102252	0.515125
Lrrfip1	0.000534906	0.389686	1	0.0740928	0.102331	0.515125
Trmt13	-0.0637598	0.00448343	1	-0.139143	0.10245	0.515125
Ncald	-0.100455	2.45117e-07	0.00742262	0.076358	0.102471	0.515125
Dcaf7	0.0240628	0.10906	1	0.0513275	0.102554	0.515162
Esrra	0.0691633	2.73419e-09	8.27966e-05	-0.0665635	0.102557	0.515162
Rbl2	-0.0158712	0.575996	1	0.0531047	0.10268	0.515536
Fam171a2	0.0664208	1.40596e-09	4.25753e-05	0.0572693	0.10285	0.515978
Mgat5	-0.015979	0.760991	1	0.0584833	0.102878	0.515978
Atp9b	-0.0309893	0.595452	1	0.0559112	0.10316	0.516757
Bicd1	-0.0970842	2.08084e-07	0.00630119	0.0676835	0.103319	0.516757
Usp14	0.0831273	1.07048e-06	0.0324162	0.047429	0.103349	0.516757
Gapvd1	-0.0255377	0.400752	1	0.0561382	0.103801	0.518208
Arhgap17	-0.0348501	0.722557	1	-0.0943751	0.104085	0.518414
Ndufs4	0.0271826	0.0188823	1	-0.0625153	0.104178	0.518497
Zfc3h1	-0.00400487	0.410055	1	0.0642037	0.104339	0.518902
Osbpl6	-0.00916393	0.267491	1	0.066155	0.104544	0.519153
Atp5md	0.169441	1.90752e-26	5.77637e-22	-0.0486821	0.104557	0.519153
Slc25a14	0.0530286	7.08083e-05	0.800114	0.0625114	0.104673	0.519153
Scn2b	0.0632936	6.86209e-08	0.00207798	0.0483456	0.104908	0.519153
Gabbr1	0.164718	2.08442e-20	6.31203e-16	0.0441788	0.104949	0.519155
Ap3d1	0.0457465	4.76846e-05	0.628852	0.0426892	0.105295	0.520339
Eif3a	-0.0140056	0.547289	1	0.0524352	0.105464	0.520339
Atcay	0.0728384	1.64768e-05	0.415858	0.0446803	0.10554	0.520339
Prr16	0.119124	9.2147e-09	0.00027904	0.164915	0.105749	0.520339
Stk32c	0.0860026	6.94808e-09	0.000210402	0.0467023	0.105764	0.520339
Fip1l1	-0.0155997	0.40514	1	0.053111	0.105939	0.520339
Gripap1	0.158163	1.15926e-14	3.51048e-10	0.0501993	0.106005	0.520339
Sgms1	-0.0248164	0.333776	1	-0.0765222	0.106143	0.520339
Cap1	0.0153319	0.0371003	1	0.053576	0.106345	0.520606
Lmbr1	-0.0230442	0.421989	1	0.0649628	0.106387	0.520606
B3gat1	0.018491	0.102939	1	0.076704	0.106403	0.520606
Ccdc187	0.0508017	3.09797e-06	0.0938127	0.0966515	0.106581	0.521083
Dag1	0.112606	1.71055e-11	5.1799e-07	0.0523057	0.107118	0.521447
Ubap2l	0.0377466	0.00417789	0.990274	0.0542296	0.107126	0.521447
Nol11	0.0147019	0.322517	1	0.0858751	0.107147	0.521447
Adgrb3	0.312926	6.34978e-53	1.92284e-48	0.0603869	0.107545	0.522401
Lrrc8c	0.0297071	0.00373237	1	-0.0792866	0.107573	0.522401
Cwf19l2	-0.0259539	0.60189	1	-0.083445	0.107823	0.523014
Gm19410	0.052417	8.23657e-05	0.789734	0.0834851	0.108206	0.523537
Sesn1	-0.0398989	0.763923	1	0.0555357	0.108835	0.525196
Hltf	-0.0278374	0.665356	1	0.0678248	0.109183	0.526288
Wnk2	0.0692041	0.000199093	0.614788	0.0625984	0.109365	0.526297
Ice1	0.057852	4.43524e-05	0.49546	0.0717065	0.109633	0.526891
Rbm33	0.0187758	0.0349294	1	0.0657965	0.109775	0.526891
Ythdf3	0.001183	0.127853	1	0.0590781	0.109825	0.526891
Shkbp1	0.0527043	5.83039e-07	0.0176556	-0.109757	0.109835	0.526891
Ttyh3	0.0807089	8.56689e-08	0.00259423	0.0510434	0.109961	0.526982
Zc3h12b	0.0348998	0.0111676	1	0.0932569	0.11014	0.526982
Nhsl2	0.107188	2.63846e-14	7.98978e-10	0.0884784	0.11028	0.526982
Mfap3l	0.0114624	0.371282	1	0.073281	0.110307	0.526982
Ndufa7	0.0600374	5.42805e-07	0.0164372	-0.0617823	0.110332	0.526982
Utp18	0.00345478	0.606248	1	0.0748418	0.11126	0.529812
Klhl12	-0.0335993	0.144228	1	0.0642633	0.111333	0.529812
Ints2	0.0361099	0.00390331	1	0.0792171	0.111386	0.529812
Pbrm1	-0.0383286	0.343807	1	0.0631315	0.11142	0.529812
Rnf169	0.025007	0.00893361	1	0.0831125	0.111495	0.529969
Katnip	0.0161059	0.0965278	1	0.0648859	0.111695	0.530532
Smad7	-0.106339	4.89818e-07	0.0148327	-0.0680108	0.111825	0.530759
Lclat1	0.0293819	0.0161315	1	0.0609439	0.112048	0.530803
Rassf8	-0.0543534	0.0756603	1	-0.0827997	0.112164	0.530803
Brd8	0.0407376	0.000410469	0.699732	0.0547304	0.11217	0.530803
Sirpa	0.0426034	3.76533e-06	0.114022	0.047007	0.112201	0.530803
B4galt6	0.0225569	0.0346881	1	0.047363	0.112803	0.532487
Plppr1	0.118618	7.77333e-09	0.000235392	0.0647087	0.113242	0.534225
Tgs1	0.0215116	0.0410824	1	0.0598718	0.11367	0.535607
Usp2	0.0745816	7.18308e-06	0.207903	0.0669443	0.113835	0.53619
Magi2	-0.472553	2.2188e-42	6.71896e-38	0.058756	0.113956	0.536568
Zbtb11	0.0607674	4.28206e-05	0.259116	0.0680877	0.114023	0.536688
Tanc1	-0.0704133	0.00220422	1	-0.107138	0.114153	0.536809
Rpl6	0.0445603	5.52324e-05	0.801719	-0.0454435	0.114173	0.536809
Gm28905	0.168869	2.35595e-09	7.1343e-05	0.235789	0.114186
Ltn1	0.0581982	2.18919e-07	0.0066293	0.0528826	0.114518	0.537518
Ksr1	-0.0118112	0.6112	1	0.0873842	0.11462	0.537518
Csmd2	-0.105274	3.16703e-09	9.59039e-05	0.0789938	0.114621	0.537518
Tmem38a	0.0801995	7.94292e-09	0.000240528	0.0476125	0.114695	0.537518
Flrt2	0.0446944	0.000950324	1	0.0633041	0.115009	0.538044
Uhrf2	0.0278231	0.0669823	1	0.0683227	0.115046	0.538044
Azi2	0.0264642	0.0448339	1	0.0552754	0.115079	0.538044
Wapl	-0.0330573	0.573514	1	0.0554922	0.115242	0.538329
Eif5b	0.0128563	0.0234308	1	-0.0565129	0.115412	0.538329
Tmem131l	0.0352604	0.0177293	1	0.0997652	0.115485	0.538329
Map4k5	-0.157099	9.57364e-05	0.55181	0.0641561	0.115518	0.538329
Sez6	0.305494	1.46448e-37	4.43474e-33	0.0541784	0.115765	0.539
Rps6kb1	-0.00277336	0.0960669	1	0.0576737	0.115968	0.539
Gsdme	0.042398	0.00148925	1	0.0965889	0.116093	0.539
Snx2	0.0240094	0.0791543	1	0.0624957	0.116201	0.539
Fam120b	0.0189016	0.0826792	1	0.0517488	0.116266	0.539
Dtnb	0.111999	1.89588e-06	0.0574112	0.0563843	0.116292	0.539
Rev1	0.109378	4.53301e-06	0.137269	0.0648984	0.11631	0.539
Dhx9	0.0257531	0.00991811	1	0.0585326	0.116338	0.539
Otud5	0.0114642	0.198703	1	0.0506993	0.116629	0.539533
Nudcd3	0.0265182	0.0286337	1	0.0433087	0.116779	0.539533
Sec24b	0.00257623	0.0803061	1	0.0679345	0.116875	0.539533
Flna	0.0684105	1.02856e-05	0.284631	0.0809302	0.116982	0.539533
Tacc1	0.0193094	0.0216288	1	0.0539921	0.117323	0.539533
Fbxl16	0.155706	8.35164e-18	2.52904e-13	0.0495236	0.117325	0.539533
Nek4	0.0229897	0.0783597	1	0.0673076	0.117364	0.539533
Ptpra	-0.0881595	0.030337	1	0.0442598	0.117501	0.539583
Add1	-0.070829	0.704681	1	0.0398661	0.117593	0.539596
Plppr5	0.00347851	0.359966	1	0.0626094	0.117725	0.53966
Ap1ar	0.0240415	0.0599501	1	0.0542926	0.117927	0.539858
Usp22	0.0233044	0.0267087	1	0.0539413	0.118078	0.539889
Ryk	-0.00120548	0.637281	1	-0.0658628	0.118107	0.539889
Lrp11	0.0471318	5.94873e-05	0.367793	0.0439087	0.118177	0.540017
Fam189a1	-0.0515473	0.000150624	0.783437	0.0673416	0.118532	0.541186
Ppp1r2	0.160246	1.37696e-12	4.16971e-08	0.0664624	0.11858	0.541186
Mipol1	-0.0210606	0.664765	1	-0.125464	0.118599	0.541186
Dpf2	0.0320303	0.00719587	0.822405	-0.0616616	0.119108	0.542936
Ppp1r13b	0.0857675	2.94078e-08	0.000890526	0.0592095	0.119264	0.543033
Trim2	-0.0979268	0.000277245	0.689607	0.0515469	0.119297	0.543033
Marchf7	0.0111818	0.200262	1	0.0664741	0.119431	0.5432
Ttc37	0.0335458	0.0773205	1	0.0736026	0.119458	0.5432
Akap6	0.0136547	0.0741991	1	0.0741916	0.119904	0.544468
6530403H02Rik	0.148578	6.06425e-09	0.000183638	0.160825	0.120095	0.544953
Golga4	0.0647876	1.2833e-05	0.284527	0.065102	0.120147	0.544999
Rpl14	0.0378695	0.000349673	0.847273	-0.0479171	0.120373	0.545451
Mcu	0.016185	0.0745376	1	0.0644678	0.120576	0.545737
Tmem167	-0.00478423	0.692207	1	0.0566203	0.120578	0.545737
Vezt	0.0140929	0.0896602	1	0.0595686	0.120625	0.545737
Commd3	0.0496048	7.12439e-05	0.696433	-0.0572254	0.120645	0.545737
Bcap31	-0.0137781	0.532961	1	-0.0644343	0.12092	0.546173
Btbd9	0.00335074	0.0479965	1	0.0534824	0.121372	0.547223
Prpf18	0.0165499	0.0387656	1	0.0495198	0.121395	0.547223
Pinx1	0.0151307	0.369247	1	-0.159715	0.12146	0.547289
Hps5	0.00497625	0.590739	1	-0.0809154	0.121522	0.547289
Atp2b3	0.0430018	0.00265974	1	0.0778614	0.121922	0.54789
Bsg	0.0749947	1.48709e-07	0.00450321	-0.0552565	0.122154	0.54824
Ank1	-0.00915006	0.476215	1	-0.165517	0.122247	0.54824
Gulp1	0.118734	2.86393e-11	8.67257e-07	0.111929	0.122295	0.54824
Dnm2	-0.0436854	0.706661	1	-0.0555173	0.122337	0.54824
Ccdc107	0.0462756	8.13966e-05	0.555111	-0.0769642	0.122564	0.548691
Cfl2	-0.0820681	0.00156868	1	-0.0571342	0.12273	0.548829
Vti1a	-0.127681	4.22212e-09	0.000127854	0.0583035	0.12315	0.550176
Pfdn1	-0.0254132	0.393904	1	-0.0606335	0.123438	0.550712
Fndc3a	0.0650398	0.000156211	0.667646	0.0600811	0.123575	0.550941
Rhoq	0.00251769	0.333854	1	-0.0715315	0.12383	0.55145
Rhot1	-0.00145897	0.277838	1	0.048801	0.123859	0.55145
Rps15	0.0762399	4.36543e-07	0.0132194	-0.0432836	0.12418	0.552124
Rev3l	-0.10045	4.60279e-07	0.0139382	0.0791255	0.124255	0.552162
Fbxo25	0.021004	0.0616703	1	0.0546711	0.124376	0.552324
Mtrex	0.0170808	0.0485908	1	0.0481418	0.124486	0.552324
Gnptab	-0.0454536	0.204053	1	0.0596317	0.124491	0.552324
Zcchc18	0.242916	7.24854e-30	2.195e-25	0.0539942	0.124686	0.552324
Elmod1	0.246894	1.20586e-27	3.65159e-23	0.0570229	0.124862	0.552324
Rptor	-0.00988294	0.443294	1	0.0646475	0.125227	0.552434
Sun1	0.0745696	1.20303e-07	0.00364303	0.0546864	0.125446	0.552975
Dpysl5	0.0197966	0.136111	1	0.0642503	0.125554	0.553127
Arhgap44	0.0518981	0.0145129	1	0.0490866	0.126054	0.554015
Tasor	-0.14184	5.16944e-05	0.597827	0.0694818	0.126624	0.554936
Slc50a1	0.0250573	0.00285272	1	-0.0764583	0.126776	0.554936
Efna5	0.0188564	0.226226	1	-0.0923708	0.126876	0.555191
Bend6	-0.0139824	0.684163	1	-0.0591819	0.127026	0.555658
Sh3gl3	-0.0110317	0.021889	1	-0.0670104	0.127298	0.556189
Cltb	0.0890096	4.66137e-10	1.41156e-05	-0.0483144	0.127315	0.556189
Sema6d	-0.126171	2.12899e-05	0.285122	-0.0467261	0.1276	0.556858
Stam	0.00179447	0.189304	1	0.0550012	0.127651	0.556894
Prepl	0.0309548	0.112383	1	0.0546985	0.127997	0.557535
Hipk3	0.0241301	0.105026	1	0.0628181	0.127999	0.557535
Fam234b	0.031886	0.00249187	1	0.0445293	0.128026	0.557535
Fnbp4	-0.00700585	0.540387	1	0.0592548	0.128055	0.557535
Nek1	-0.0366582	0.757251	1	0.0633668	0.128148	0.557701
Dscaml1	-0.315152	2.33153e-29	7.06035e-25	0.0750129	0.128179	0.557701
Sv2a	0.0706183	0.000132144	0.3192	-0.0472867	0.128772	0.558759
Map4k2	0.0316719	0.00419909	1	-0.0545122	0.128847	0.558759
AW554918	-0.0684245	0.100709	1	0.0844069	0.128895	0.558759
Ralgapa1	-0.0169098	0.437357	1	0.0575619	0.129438	0.559819
Marchf4	0.0318167	0.00600756	1	0.0694749	0.129518	0.559819
Egfem1	0.0849748	0.205422	1	0.134175	0.129562	0.559819
Dnaja2	0.0521208	0.000758149	1	0.0515241	0.129612	0.559819
Chsy3	0.109203	1.15592e-08	0.000350035	0.0822029	0.129702	0.559819
Ylpm1	-0.0363728	0.0421784	1	0.0784784	0.129728	0.559819
Ankhd1	-0.0582043	0.555637	1	0.0780213	0.12976	0.559819
Csnk1g3	-0.0104021	0.386923	1	0.0548283	0.129828	0.559819
Arih2	0.0077378	0.181735	1	0.0546324	0.130337	0.561256
Ndufa10	0.0310176	0.00476415	1	-0.0507791	0.13038	0.561256
Aktip	0.0124655	0.194681	1	-0.0456006	0.130685	0.561837
Noct	0.0347073	0.00358456	0.910224	0.0651314	0.131004	0.562587
Nbdy	0.00646095	0.382255	1	-0.0730265	0.131478	0.563571
Osbp2	0.0571811	0.0100253	1	0.0507672	0.131556	0.563719
Chic1	-0.0051174	0.669804	1	0.0613522	0.131889	0.564543
Itch	-0.124178	0.00328528	1	0.0493897	0.131957	0.564543
Mosmo	-0.000267912	0.443549	1	0.0546111	0.131965	0.564543
Rb1cc1	-0.0583179	0.00751824	1	0.054719	0.132318	0.565309
Ubn1	0.00143327	0.327131	1	0.05862	0.132519	0.565796
Ppip5k1	0.11636	2.94132e-11	8.9069e-07	0.0580705	0.132746	0.565891
Tle5	0.0434006	0.000517859	0.85724	-0.0409374	0.132771	0.565891
Zfp609	-0.0114557	0.363292	1	0.0642741	0.133165	0.566686
Lonrf2	0.0572892	0.000619022	0.710591	0.0637548	0.133414	0.566824
Orc3	0.0431599	0.000785797	1	0.0593516	0.133549	0.567211
Ctxn1	0.109934	9.87483e-16	2.99029e-11	0.0457876	0.133637	0.5674
Ppp6r3	-0.0543578	0.291631	1	0.0524315	0.134159	0.568688
Tomm70a	0.180323	9.83208e-21	2.97735e-16	0.0612684	0.134208	0.568712
Pik3c2b	-0.0956349	0.486798	1	-0.0669477	0.134364	0.569002
Gfm2	0.0215333	0.0313052	1	0.0737525	0.134697	0.570042
Fmn2	-0.00218655	0.37532	1	0.0550082	0.134765	0.570142
Cttn	0.031125	0.015319	1	0.04576	0.134812	0.570156
Gm26542	0.0187746	0.0808316	1	-0.420076	0.134964
Actr3	0.0221493	0.00346831	1	0.0458576	0.135157	0.570874
Trp53bp1	0.0704277	4.54562e-05	0.633501	0.0555845	0.135489	0.57117
Pcnx4	0.0286812	0.0388081	1	0.0583804	0.135663	0.57134
Nfatc2	0.049569	0.000432177	0.968158	0.0788028	0.135861	0.571556
Impact	0.0291365	0.0020739	0.873791	0.0493589	0.135871	0.571556
Zer1	0.0525312	3.063e-06	0.0927539	0.0502433	0.135974	0.571723
Zfp236	-0.0010345	0.0526406	1	0.0631136	0.136067	0.571932
Sorbs1	0.0251097	0.075707	1	0.0741491	0.136366	0.572326
Ubl5	0.0683093	2.75466e-08	0.000834166	-0.0544575	0.136425	0.572326
Cog7	0.0288167	0.00407877	1	0.054308	0.136771	0.57322
Usp10	0.0343376	0.00271938	0.947079	0.0594844	0.136842	0.573333
Fbf1	0.0547408	8.63716e-06	0.26155	0.0560267	0.137004	0.573637
Cnnm2	0.0407278	0.0118923	0.931675	0.0574387	0.137037	0.573637
Fgfr1op2	0.0289334	0.000879588	0.998782	0.0508953	0.137047	0.573637
Gm12394	0.0326247	0.0318428	1	0.340682	0.137404
Esyt2	-0.0123778	0.481408	1	0.0598628	0.137412	0.574253
Ppp2r2a	-0.00978012	0.668419	1	0.0532532	0.137504	0.574253
Aplp1	-0.230629	0.224228	1	-0.0404205	0.137591	0.574253
Ttll4	0.0352883	0.000261503	1	0.0747831	0.137819	0.574833
Snx25	0.0139116	0.122131	1	0.0483422	0.138013	0.575167
Degs1	-0.0140655	0.673485	1	-0.0506258	0.138093	0.575167
Cdh20	-0.4651	2.38068e-35	7.20919e-31	-0.0923951	0.138148	0.575167
Dnm1l	0.0350918	0.00601566	1	0.0416513	0.138164	0.575167
Lncpint	0.0669836	0.00137382	0.917597	0.400038	0.138768
Sort1	-0.0287598	0.141622	1	0.0478887	0.139101	0.576947
[truncated: 3,203 more rows]
