# Supplementary material for: An X-linked long non-coding RNA, PTCHD1-AS, regulates autistic behaviors in humans and in mice
Source: Research Square preprint supplement (doi:10.21203/rs.3.rs-5619348/v1), 2025-01-13
Supplement: Supplementary file 10 [file Supplementary Table 16.xlsx]

## Sheet: Striatum DEPs
Protein accessions	Gene	Log2FC_Striatum	PValue_Striatum	FDR_Striatum
sp|P68404|KPCB_MOUSE	KPCB	-0.63455	4.02961e-07	0.000722912
sp|P46096|SYT1_MOUSE_family	SYT1	-0.505047	1.63948e-06	0.000739445
sp|Q63810|CANB1_MOUSE	CANB1	-0.412121	1.64871e-06	0.000739445
sp|P43277|H13_MOUSE	H13	-0.813399	8.53437e-07	0.000739445
sp|P14824|ANXA6_MOUSE	ANXA6	-0.71801	4.13258e-06	0.00148277
sp|Q78JW9|UBFD1_MOUSE	UBFD1	-0.567651	7.2973e-06	0.00217508
sp|P40630|TFAM_MOUSE	TFAM	-0.274834	8.48692e-06	0.00217508
sp|P31650|S6A11_MOUSE	S6A11	0.275317	1.00334e-05	0.00224999
sp|P0DP26|CALM1_MOUSE (+2)	CALM1	-0.381771	1.45885e-05	0.00290798
sp|Q9Z140|CPNE6_MOUSE	CPNE6	-0.511193	4.8547e-05	0.00870933
sp|Q99LD4|CSN1_MOUSE	CSN1	0.168153	6.67155e-05	0.0108807
sp|P63318|KPCG_MOUSE	KPCG	-0.375958	9.32605e-05	0.0139424
sp|Q6PD03|2A5A_MOUSE	2A5A	-0.295778	0.000102647	0.0141654
sp|P09405|NUCL_MOUSE	NUCL	-0.145651	0.00011269	0.0144404
sp|O88343|S4A4_MOUSE	S4A4	0.111964	0.000271113	0.0324251
sp|Q8R2R9|AP3M2_MOUSE	AP3M2	-0.336246	0.000377484	0.0423254
sp|Q07076|ANXA7_MOUSE	ANXA7	-0.266962	0.00044854	0.0473342
sp|P97742|CPT1A_MOUSE	CPT1A	0.108662	0.000518976	0.0517246
sp|Q8VDM4|PSMD2_MOUSE	PSMD2	0.0976643	0.000738295	0.0697106
sp|P62717|RL18A_MOUSE	RL18A	-0.129541	0.000923936	0.0787731
sp|P60766|CDC42_MOUSE	CDC42	-0.163253	0.00111112	0.0787731
sp|P48036|ANXA5_MOUSE	ANXA5	-0.330498	0.00108798	0.0787731
sp|P11031|TCP4_MOUSE	TCP4	-0.49403	0.00112164	0.0787731
sp|Q922Q8|LRC59_MOUSE	LRC59	-0.149055	0.000898179	0.0787731
sp|P61294|RAB6B_MOUSE	RAB6B	0.12828	0.000975116	0.0787731
sp|P46662|MERL_MOUSE	MERL	0.152156	0.00114164	0.0787731
sp|O54829|RGS7_MOUSE	RGS7	0.124043	0.00150641	0.0844532
sp|Q60668|HNRPD_MOUSE	HNRPD	-0.119658	0.00145082	0.0844532
sp|P62858|RS28_MOUSE	RS28	-0.173662	0.0014627	0.0844532
sp|Q8BJY1|PSMD5_MOUSE	PSMD5	-0.255409	0.00143041	0.0844532
sp|P03995|GFAP_MOUSE	GFAP	0.269371	0.00148349	0.0844532
sp|Q9Z130|HNRDL_MOUSE	HNRDL	-0.366226	0.00137588	0.0844532
sp|P63089|PTN_MOUSE	PTN	-0.578647	0.00171306	0.0931282
sp|P46471|PRS7_MOUSE	PRS7	0.116592	0.0018317	0.0938875
sp|Q9CX86|ROA0_MOUSE	ROA0	-0.336639	0.00182479	0.0938875
sp|Q7TPR4|ACTN1_MOUSE	ACTN1	0.222498	0.00207496	0.100607
sp|Q99J08|S14L2_MOUSE	S14L2	0.265477	0.0020364	0.100607
sp|Q8BK64|AHSA1_MOUSE	AHSA1	0.102028	0.00247101	0.116658
sp|Q8R149|BUD13_MOUSE	BUD13	0.159071	0.00253804	0.11675
sp|P31786|ACBP_MOUSE	ACBP	0.26312	0.00312184	0.140015
sp|P70335|ROCK1_MOUSE	ROCK1	-0.216847	0.00347859	0.152209
sp|P43274|H14_MOUSE	H14	-0.487839	0.00373769	0.159653
sp|Q99JF8|PSIP1_MOUSE	PSIP1	-0.15626	0.00453109	0.162575
sp|Q8VEK3|HNRPU_MOUSE	HNRPU	-0.162818	0.00393648	0.162575
sp|P51174|ACADL_MOUSE	ACADL	0.113749	0.00438426	0.162575
sp|Q80UG2|PLXA4_MOUSE	PLXA4	-0.104356	0.00444418	0.162575
sp|Q6R891|NEB2_MOUSE	NEB2	0.158828	0.00416708	0.162575
sp|Q8CC35|SYNPO_MOUSE	SYNPO	0.248747	0.00429971	0.162575
sp|Q6ZPQ6|PITM2_MOUSE	PITM2	0.146627	0.00433548	0.162575
sp|Q9WVE8|PACN2_MOUSE	PACN2	0.140992	0.00437123	0.162575
sp|P14231|AT1B2_MOUSE	AT1B2	0.0965026	0.00469874	0.164103
sp|P28184|MT3_MOUSE	MT3	-0.278122	0.00484808	0.164103
sp|Q9EP89|LACTB_MOUSE	LACTB	-0.324927	0.00482823	0.164103
sp|Q6PH08|ERC2_MOUSE	ERC2	-0.121002	0.00510778	0.169692
sp|Q9QZQ1|AFAD_MOUSE	AFAD	0.130293	0.00529813	0.172815
sp|Q9QXS1|PLEC_MOUSE	PLEC	0.294429	0.00551238	0.176593
sp|P62301|RS13_MOUSE	RS13	-0.203856	0.00573802	0.177483
sp|P97355|SPSY_MOUSE	SPSY	0.167211	0.00571151	0.177483
sp|P02802|MT1_MOUSE	MT1	-0.20184	0.00590839	0.179655
sp|P15864|H12_MOUSE	H12	-0.623783	0.00634402	0.189686
sp|Q9EQH3|VPS35_MOUSE	VPS35	-0.0817332	0.00669325	0.196847
sp|Q6PDM2|SRSF1_MOUSE	SRSF1	-0.189402	0.00680629	0.196943
sp|Q60865|CAPR1_MOUSE	CAPR1	-0.222138	0.00738586	0.210321
sp|Q99NE5|RIMS1_MOUSE	RIMS1	-0.171015	0.00775726	0.217446
sp|Q9DCN2|NB5R3_MOUSE	NB5R3	-0.0885987	0.00810005	0.220174
sp|Q8C754|VPS52_MOUSE	VPS52	0.0898751	0.00800899	0.220174
sp|P06837|NEUM_MOUSE	NEUM	-0.252963	0.00826816	0.221389
sp|P35486|ODPA_MOUSE	ODPA	0.0738728	0.00968207	0.243735
sp|P47757|CAPZB_MOUSE	CAPZB	0.0841751	0.0101896	0.243735
sp|Q8CHT1|NGEF_MOUSE	NGEF	-0.14204	0.0101453	0.243735
sp|P18242|CATD_MOUSE	CATD	0.0927268	0.00936233	0.243735
sp|Q62419|SH3G1_MOUSE	SH3G1	0.100901	0.00955611	0.243735
sp|Q9CZM2|RL15_MOUSE	RL15	-0.271763	0.00992704	0.243735
sp|Q8BRJ3|RELL2_MOUSE	RELL2	-0.201007	0.00975593	0.243735
sp|Q80UU9|PGRC2_MOUSE	PGRC2	0.17765	0.0101584	0.243735
sp|P55258|RAB8A_MOUSE	RAB8A	0.151702	0.0103682	0.244744
sp|P36993|PPM1B_MOUSE	PPM1B	0.0937748	0.0105291	0.245314
sp|Q8BIJ6|SYIM_MOUSE	SYIM	0.0700431	0.0114309	0.256338
sp|P05132|KAPCA_MOUSE	KAPCA	-0.0990527	0.0112978	0.256338
sp|Q9CY58|PAIRB_MOUSE	PAIRB	-0.215943	0.0111588	0.256338
sp|Q9D0J8|PTMS_MOUSE	PTMS	-0.0886153	0.0117298	0.259794
sp|Q9WUA3|PFKAP_MOUSE	PFKAP	0.0853166	0.0128628	0.268324
sp|Q8BLK3|LSAMP_MOUSE	LSAMP	-0.16104	0.0126376	0.268324
sp|Q9JME5|AP3B2_MOUSE	AP3B2	-0.184398	0.0127183	0.268324
sp|Q8BP47|SYNC_MOUSE	SYNC	0.0743362	0.0126355	0.268324
sp|Q99PJ0|NTRI_MOUSE	NTRI	-0.217964	0.0125094	0.268324
sp|P60710|ACTB_MOUSE_family	ACTB	0.110318	0.0145789	0.268688
sp|Q60931|VDAC3_MOUSE	VDAC3	-0.287724	0.0152506	0.268688
sp|Q9D2G5|SYNJ2_MOUSE	SYNJ2	0.0945051	0.0152766	0.268688
sp|P63325|RS10_MOUSE	RS10	-0.138002	0.0143083	0.268688
sp|P48320|DCE2_MOUSE	DCE2	0.153176	0.0135273	0.268688
sp|Q8BKZ9|ODPX_MOUSE	ODPX	-0.0883614	0.0149741	0.268688
sp|Q9WUB3|PYGM_MOUSE	PYGM	0.0908419	0.0133925	0.268688
sp|Q99PU5|ACBG1_MOUSE	ACBG1	0.0882312	0.0138634	0.268688
sp|P20444|KPCA_MOUSE	KPCA	-0.430762	0.0135682	0.268688
sp|Q9CS84|NRX1A_MOUSE	NRX1A	0.108449	0.0142681	0.268688
sp|Q9CQJ6|DENR_MOUSE	DENR	0.100569	0.015001	0.268688
sp|Q99020|ROAA_MOUSE	ROAA	-0.15739	0.013798	0.268688
sp|P97461|RS5_MOUSE	RS5	-0.132911	0.0137116	0.268688
sp|Q61335|BAP31_MOUSE	BAP31	0.203598	0.0151389	0.268688
sp|Q2NL51|GSK3A_MOUSE	GSK3A	0.162482	0.0151926	0.268688
sp|Q9DBG6|RPN2_MOUSE	RPN2	-0.25575	0.014939	0.268688
sp|Q99JI6|RAP1B_MOUSE	RAP1B	-0.0894469	0.0158704	0.276422
sp|Q04447|KCRB_MOUSE	KCRB	0.0793529	0.0164466	0.281003
sp|O89086|RBM3_MOUSE	RBM3	-0.145143	0.0163201	0.281003
sp|P20152|VIME_MOUSE	VIME	0.309867	0.0166915	0.282495
sp|Q60932|VDAC1_MOUSE	VDAC1	-0.431631	0.017705	0.2941
sp|O70591|PFD2_MOUSE	PFD2	-0.100961	0.0176966	0.2941
sp|O54774|AP3D1_MOUSE	AP3D1	-0.191891	0.0183798	0.302508
sp|Q4KUS2|UN13A_MOUSE	UN13A	0.40887	0.0186572	0.304281
sp|Q62261|SPTB2_MOUSE	SPTB2	0.0783084	0.0200158	0.323498
sp|Q9ERD7|TBB3_MOUSE	TBB3	0.105721	0.0205971	0.329921
sp|P08113|ENPL_MOUSE	ENPL	0.0876581	0.0216126	0.343125
sp|Q9Z268|RASL1_MOUSE	RASL1	-0.12909	0.0243726	0.365502
sp|Q91XM9|DLG2_MOUSE	DLG2	0.0753403	0.023483	0.365502
sp|P47791|GSHR_MOUSE	GSHR	0.0912926	0.0240285	0.365502
sp|B1AWN6|SCN2A_MOUSE	SCN2A	0.115065	0.0232686	0.365502
sp|Q8K386|RAB15_MOUSE	RAB15	-0.130001	0.0241263	0.365502
sp|Q6PEB6|PHOCN_MOUSE	PHOCN	-0.1097	0.0239846	0.365502
sp|Q62048|PEA15_MOUSE	PEA15	-0.201547	0.0244483	0.365502
sp|Q91YT0|NDUV1_MOUSE	NDUV1	-0.180266	0.0254054	0.368298
sp|O88741|GDAP1_MOUSE	GDAP1	-0.0946158	0.0256307	0.368298
sp|P52503|NDUS6_MOUSE	NDUS6	-0.160392	0.0257587	0.368298
sp|P61164|ACTZ_MOUSE	ACTZ	0.127352	0.0248551	0.368298
sp|Q9D154|ILEUA_MOUSE	ILEUA	0.270174	0.0250916	0.368298
sp|Q62442|VAMP1_MOUSE	VAMP1	-0.195353	0.0258671	0.368298
sp|P62761|VISL1_MOUSE	VISL1	-0.111977	0.0278764	0.368374
sp|P01831|THY1_MOUSE	THY1	-0.202501	0.0265877	0.368374
sp|P70336|ROCK2_MOUSE	ROCK2	0.0765593	0.0281157	0.368374
sp|P62482|KCAB2_MOUSE	KCAB2	0.0770531	0.0277384	0.368374
sp|Q9DBF1|AL7A1_MOUSE	AL7A1	-0.061646	0.0281311	0.368374
sp|Q9Z0H4|CELF2_MOUSE	CELF2	-0.0887385	0.0280862	0.368374
sp|P63276|RS17_MOUSE	RS17	-0.180467	0.0272402	0.368374
sp|O35658|C1QBP_MOUSE	C1QBP	-0.146576	0.0263094	0.368374
sp|Q9QYB1|CLIC4_MOUSE	CLIC4	0.158745	0.0266607	0.368374
sp|Q9QZB9|DCTN5_MOUSE	DCTN5	0.0914059	0.0275147	0.368374
sp|Q8R317|UBQL1_MOUSE	UBQL1	0.194617	0.0272131	0.368374
sp|P14131|RS16_MOUSE	RS16	-0.170712	0.0285662	0.37136
sp|P62264|RS14_MOUSE	RS14	-0.151837	0.0290798	0.375317
sp|Q3UUI3|THEM4_MOUSE	THEM4	0.0940814	0.0293677	0.376326
sp|Q8BUV3|GEPH_MOUSE	GEPH	-0.0735121	0.0296056	0.376684
sp|Q6PIE5|AT1A2_MOUSE_family	AT1A2	0.0641775	0.0325615	0.377219
sp|Q9D6F9|TBB4A_MOUSE	TBB4A	0.0924437	0.0311563	0.377219
sp|O54983|CRYM_MOUSE	CRYM	-0.127766	0.031618	0.377219
sp|P68254|1433T_MOUSE	1433T	0.0764009	0.0312583	0.377219
sp|Q9D8E6|RL4_MOUSE	RL4	-0.147395	0.0308195	0.377219
sp|A2AGT5|CKAP5_MOUSE	CKAP5	-0.0889824	0.0317754	0.377219
sp|Q68FF6|GIT1_MOUSE	GIT1	-0.078614	0.0307049	0.377219
sp|P86048|RL10L_MOUSE (+1)	RL10L	-0.0894624	0.031346	0.377219
sp|Q9CZY3|UB2V1_MOUSE	UB2V1	0.0775864	0.0310982	0.377219
sp|Q921F2|TADBP_MOUSE	TADBP	-0.0703777	0.0325913	0.377219
sp|Q9CQ91|NDUA3_MOUSE	NDUA3	-0.211842	0.0320236	0.377219
sp|Q9CR61|NDUB7_MOUSE	NDUB7	-0.188533	0.0325631	0.377219
sp|Q9CPW0|CNTP2_MOUSE	CNTP2	-0.211829	0.0305508	0.377219
sp|Q60872|IF1A_MOUSE (+1)	IF1A	0.114181	0.0311377	0.377219
sp|P40142|TKT_MOUSE	TKT	0.0863713	0.0335296	0.383135
sp|P62911|RL32_MOUSE	RL32	-0.175407	0.0333179	0.383135
sp|Q6ZWN5|RS9_MOUSE	RS9	-0.120275	0.0339618	0.385617
sp|P84075|HPCA_MOUSE_family	HPCA	-0.133383	0.0342127	0.386023
sp|P04370|MBP_MOUSE	MBP	0.237573	0.0345016	0.386849
sp|Q05920|PYC_MOUSE	PYC	0.0573519	0.0365579	0.387705
sp|P56379|ATP68_MOUSE	ATP68	0.160024	0.036921	0.387705
sp|P62702|RS4X_MOUSE	RS4X	-0.174395	0.0362071	0.387705
sp|P35979|RL12_MOUSE	RL12	-0.174473	0.0360352	0.387705
sp|P47962|RL5_MOUSE	RL5	-0.122956	0.0381383	0.387705
sp|Q9R1V6|ADA22_MOUSE	ADA22	-0.0572831	0.0371025	0.387705
sp|P12815|PDCD6_MOUSE	PDCD6	-0.109446	0.0353294	0.387705
sp|O08532|CA2D1_MOUSE	CA2D1	-0.139385	0.0365034	0.387705
sp|Q9Z0H8|CLIP2_MOUSE	CLIP2	0.0572662	0.0382518	0.387705
sp|Q8R1I1|QCR9_MOUSE	QCR9	-0.279537	0.0354052	0.387705
sp|Q6ZWV7|RL35_MOUSE	RL35	-0.13519	0.0378919	0.387705
sp|O88998|NOE1_MOUSE	NOE1	-0.0795661	0.0362177	0.387705
sp|P60843|IF4A1_MOUSE	IF4A1	-0.151397	0.0358416	0.387705
sp|Q9ER88|RT29_MOUSE	RT29	-0.101808	0.037614	0.387705
sp|P53996|CNBP_MOUSE	CNBP	-0.0990628	0.0380757	0.387705
sp|Q91YN5|UAP1_MOUSE	UAP1	0.203838	0.0359513	0.387705
sp|Q8BMJ2|SYLC_MOUSE	SYLC	-0.210349	0.0373093	0.387705
sp|Q9DD18|DTD1_MOUSE	DTD1	-0.128293	0.0385623	0.388656
sp|Q9JJK2|LANC2_MOUSE	LANC2	0.084728	0.0391029	0.389828
sp|P68040|RACK1_MOUSE	RACK1	-0.0934341	0.0393305	0.389828
sp|Q9Z2A0|PDPK1_MOUSE	PDPK1	0.118983	0.0391952	0.389828
sp|Q7TMF3|NDUAC_MOUSE	NDUAC	-0.149145	0.0400175	0.394458
sp|P36916|GNL1_MOUSE	GNL1	0.0816272	0.0404831	0.396867
sp|P16546|SPTN1_MOUSE	SPTN1	0.0665314	0.041217	0.397569
sp|Q61599|GDIR2_MOUSE	GDIR2	-0.122576	0.0412196	0.397569
sp|Q04899|CDK18_MOUSE	CDK18	0.414389	0.0411951	0.397569
sp|Q9QUR7|PIN1_MOUSE	PIN1	0.0658117	0.041596	0.399055
sp|P01942|HBA_MOUSE	HBA	0.184443	0.0444096	0.399826
sp|P18872|GNAO_MOUSE	GNAO	-0.068983	0.0435575	0.399826
sp|Q7TMM9|TBB2A_MOUSE_family	TBB2A	0.0721082	0.0422321	0.399826
sp|P08228|SODC_MOUSE	SODC	-0.104121	0.0452291	0.399826
sp|P19536|COX5B_MOUSE	COX5B	-0.18223	0.0454651	0.399826
sp|P97351|RS3A_MOUSE	RS3A	-0.120288	0.0442045	0.399826
sp|Q922B2|SYDC_MOUSE	SYDC	0.106106	0.0437958	0.399826
sp|Q9D0R2|SYTC_MOUSE	SYTC	0.143269	0.0445797	0.399826
sp|P25444|RS2_MOUSE	RS2	-0.148845	0.0452766	0.399826
sp|P48318|DCE1_MOUSE	DCE1	0.0886195	0.0437481	0.399826
sp|P63323|RS12_MOUSE	RS12	-0.0995611	0.0422836	0.399826
sp|O35633|VIAAT_MOUSE	VIAAT	0.0791256	0.0444926	0.399826
sp|Q9D1R9|RL34_MOUSE	RL34	-0.162004	0.0454631	0.399826
sp|Q791V5|MTCH2_MOUSE	MTCH2	-0.156598	0.0442676	0.399826
sp|P28650|PURA1_MOUSE	PURA1	0.0867847	0.0447333	0.399826
sp|Q14BB9|MA6D1_MOUSE	MA6D1	-0.104837	0.0426533	0.399826
sp|Q80VP0|TCPR1_MOUSE	TCPR1	-0.203861	0.0452372	0.399826
sp|Q9CXW4|RL11_MOUSE	RL11	-0.131742	0.0459659	0.402258
sp|Q922F4|TBB6_MOUSE	TBB6	0.078906	0.0464972	0.402976
sp|Q60649|CLPB_MOUSE	CLPB	-0.112284	0.0463998	0.402976
sp|P62852|RS25_MOUSE	RS25	-0.120857	0.0490812	0.423325
sp|Q9CQZ6|NDUB3_MOUSE	NDUB3	-0.13143	0.0498819	0.424668
sp|O55091|IMPCT_MOUSE	IMPCT	-0.0864719	0.0498838	0.424668

## Sheet: Cortex DEPs
Protein accessions	Gene	Log2FC_Cortex	PValue_Cortex	FDR_Cortex
sp|P17710|HXK1_MOUSE	HXK1	0.17422	0.0183552	0.99834
sp|O88343|S4A4_MOUSE	S4A4	-0.0750567	0.0146351	0.99834
sp|Q01768|NDKB_MOUSE	NDKB	-0.130187	0.0469311	0.99834
sp|P54071|IDHP_MOUSE	IDHP	-0.0578748	0.0222096	0.99834
sp|Q9R0Q7|TEBP_MOUSE	TEBP	0.0686615	0.048021	0.99834
sp|P05132|KAPCA_MOUSE	KAPCA	-0.0808591	0.0386293	0.99834
sp|Q61206|PA1B2_MOUSE	PA1B2	-0.0627041	0.041495	0.99834
sp|Q9D2G5|SYNJ2_MOUSE	SYNJ2	0.107602	0.00574542	0.99834
sp|Q99JY0|ECHB_MOUSE	ECHB	-0.0753124	0.0115057	0.99834
sp|Q9QUH0|GLRX1_MOUSE	GLRX1	-0.064008	0.0484109	0.99834
sp|Q9Z0H8|CLIP2_MOUSE	CLIP2	0.0698591	0.0114712	0.99834
sp|Q62283|TSN7_MOUSE	TSN7	-0.0831057	0.0348384	0.99834
sp|Q60631|GRB2_MOUSE	GRB2	0.0673385	0.049355	0.99834
sp|O70310|NMT1_MOUSE	NMT1	0.0910841	0.044819	0.99834
sp|Q9D1D4|TMEDA_MOUSE	TMEDA	0.059857	0.029875	0.99834
sp|O70325|GPX4_MOUSE	GPX4	-0.0839582	0.0259752	0.99834
sp|Q9DCD0|6PGD_MOUSE	6PGD	-0.0772699	0.0165066	0.99834
sp|Q9Z0X1|AIFM1_MOUSE	AIFM1	0.0803878	0.0107914	0.99834
sp|Q9D8B3|CHM4B_MOUSE	CHM4B	0.0846448	0.0183897	0.99834
sp|Q7M729|SCN4B_MOUSE	SCN4B	-0.135688	0.0298488	0.99834
sp|Q60649|CLPB_MOUSE	CLPB	-0.175239	0.00188228	0.99834
sp|P62075|TIM13_MOUSE	TIM13	0.0751876	0.0455873	0.99834
sp|A2AQ25|SKT_MOUSE	SKT	0.10274	0.0274506	0.99834
sp|Q9D8W7|OCAD2_MOUSE	OCAD2	-0.166914	0.025026	0.99834
sp|O89086|RBM3_MOUSE	RBM3	-0.138016	0.0223695	0.99834
sp|Q9QUG9|GRP2_MOUSE	GRP2	-0.143626	0.0142245	0.99834
sp|Q9WVE8|PACN2_MOUSE	PACN2	0.10756	0.0296628	0.99834
sp|P07759|SPA3K_MOUSE	SPA3K	0.163441	0.00413212	0.99834
sp|Q9R1C6|DGKE_MOUSE	DGKE	0.160726	0.0311576	0.99834
sp|Q91YN5|UAP1_MOUSE	UAP1	-0.207599	0.0326726	0.99834
sp|Q8BIZ1|ANS1B_MOUSE	ANS1B	0.148903	0.0301245	0.99834
sp|Q9ES00|UBE4B_MOUSE	UBE4B	-0.202317	0.0424354	0.99834
sp|O70566|DIAP2_MOUSE	DIAP2	-0.185722	0.0352953	0.99834
sp|Q80TE7|LRRC7_MOUSE	LRRC7	-0.189688	0.0301634	0.99834
sp|Q80YX1|TENA_MOUSE	TENA	-0.691017	0.0130349	0.99834
sp|Q99LG2|TNPO2_MOUSE	TNPO2	-0.457684	0.000818945	0.99834
sp|Q8BH64|EHD2_MOUSE	EHD2	-0.522683	0.00481411	0.99834
