# Supplementary material for: An X-linked long non-coding RNA, PTCHD1-AS, regulates autistic behaviors in humans and in mice
Source: Research Square preprint supplement (doi:10.21203/rs.3.rs-5619348/v1), 2025-01-13
Supplement: Supplementary file 13 [file Supplementary Table 2.xlsx]

## Sheet: ASD males
Family	I	II	II	III	IV	V	VI	VII	VIII	IX	X	XI	XII	XIII	XIV	XIV	XV	XVI	XVII	XVIII	XIX	XIX	XIX	XX	XXI	XXII	XXIII
Participant	1	2	3	4	5	6	7	8	9	10	11	12	13	14	15	16	17	18	19	20	21	22	23	24	25	26	27
ID	1-0779-003	1-0186-004	1-0186-005	7-0393-003	7-0391-003	1-0767-003	1-0277-003	7-0662-003	SSC03274	SSC5744	SSC12475	SSC09667	SP0227006	2-0225-003	MSSNG00047-003	MSSNG00047-004	2-0068-003	7-0507-003	5-5021-003	MSSNG00206-003	7-0342-003	7-0342-004	7-0342-005	SP0134243	SSC05753	SP0297238	SP0301210
Impact of deletion	PTCHD1; PTCHD1-AS; DDX53	PTCHD1; PTCHD1-AS	PTCHD1; PTCHD1-AS	PTCHD1-AS; DDX53	PTCHD1-AS; DDX53	PTCHD1-AS; DDX53	PTCHD1-AS; DDX53	PTCHD1-AS; DDX53	PTCHD1-AS; DDX53	PTCHD1-AS; DDX53	PTCHD1-AS; DDX53	PTCHD1-AS; DDX53	PTCHD1-AS; DDX53	PTCHD1-AS	PTCHD1-AS	PTCHD1-AS	PTCHD1-AS	PTCHD1-AS	PTCHD1-AS	PTCHD1-AS	PTCHD1-AS	PTCHD1-AS	PTCHD1-AS	PTCHD1-AS	PTCHD1-AS	PTCHD1-AS	PTCHD1-AS
Age of diagnosis or assessment (years)	6	3	3	6	5	14	12	4	10.7	10.5	14.5	6.75	7	8	6	5	5	2	5	2.5	5	5	3	10	4.4	11	7
ASD diagnosis	autism	ASD	ASD	ASD features	ASD features	ASD/PDD	Autism	ASD	Autism	ASD	Autism	Autism	ASD	Autism	ASD	Autism	ASD	ASD	ASD	ASD	ASD	ASD	ASD	ASD	Autism	ASD	ASD
Intellectual Delay	Yes	Borderline	Borderline	No	-	No	Yes	-	Yes	No	No	Borderline	Cognitive impairment	-	No	No	-	-	-	No	Global ability: profoundly impaired	Yes	Yes	Cognitive impairment	No	-	-
IQ (test)	60 (StanfordBinet)	79 (Wechsler)	73 (Wechsler)	93 (NA)	-	High average (DAS-II)	42 (Leiter)	-	55 (NA)	106	94 (WASI)	75	-	37 (Leiter)	76 (Wechsler)	89 (Wechsler)	-	-	-	80 (Mullen)	-	-	62 (Mullen)	-	89 (NA)	-	-
Developmental/ Motor Delay	-	Global Developmental Delay	Developmental Delay; mild dystaxia; wide based gait; mild ataxia	fine motor delay	-	-	-	-	-		-	-	-	-			-	-	gross / fine motor skills moderately delayed for age	-	-	-	very low range in fine motor and visual reception	-	-	-	-
Speech Language Delay/ issues	-	-	language delay; communication problems	lisp	-	-	-	-	written expression disorder	-	speech delay; pragmatics language disorder; stuttering	-	Language delay/disorder; non-verbal	non-verbal			-	limited speech (non-verbal); Delays in receptive and expressive language, social communication	mild difficulties with nonverbal communication	-	-	-	very low range in expressive and receptive language	-	-	-	-
Seizures	-	-		Yes	-	Yes	-	-	-	-	-	Yes	-	Yes	-	Yes	-	-	-	-	-	Suspected	-	-	-	-	-
Hypotonia	-	mild	distal extremeties slightly hypotonic	yes, at birth	-	-	-	-	-	-	-	-	-	-	-		-	-	average muscle tone and strength	-	-	-	-	-	-	-	-
Dysmorphology features	-	-	-	facial and other mild features	-	-	-	-	-	-	-	-	-	-	-		-	Yes	-	-	-	-	-	-	abnormal shape polydactyly	-	-
ADHD	-	Features	-	Yes	-	Yes	-	-	-	-	Yes	-	-	-	Yes	Yes	-	-	-	-	ADD	Yes	-	-	-	-	-
Other Neurodevelopmental Disorders	-	sensory integration dysfunction	-	Disruptive Behaviour Disorder	-	Oppositional defiant disorder; anxiety; OCD	-	-	Anxiety Disorder; OCD	Anxiety Disorder; Depressive Disorder	mixed expressive disorder; learning disorder (math)	-	-	-	-	anxiety features	anxiety; depression	-	-	-	Abherrant behaviour disorder	Abherrant behaviour disorder; short term memory disorder	Abherrant behaviour disorder; apraxia	-	-	-	-
Other medical conditions	-	recurrent nosebleeds and ear infections	allergies (dog)	frequent respiratory infections; GI -colitis, diarrhea	-	Learning disability; allergies	-	-	environmental allergies; asthma	allergies	congenital heart defect; environmental and food allergies; asthma; bowel disorders; autoimmune disorder; psoriasis; migraines	gastrointestinal issues	-	-	asthma; hearing impairment	asthma; hearing impairment	-	-	macrocephaly; recurrent otitis	-	growth restirction; precocious puberty; advanced bone age	dyslexia	-	-	bowel disorder	-	eating problems
Other pathogenic variants	none	none	none	none	none	none	none	-	none	none	none	none	none	none	SATB1, p.R385X, paternal| chr22:	SATB1, p.R385X, paternal; 22q11.21, 1.6Mb duplication (recurrent proximal A-D), paternal	none	none	none	none	none	none	none	none	16p11.2 [29,437,001-30,291,000]x1, maternal (854kb DEL; BP4-BP5) [pathogenic]	none	none
"-" indicates not reported

## Sheet: Unaffected male siblings
Family	VIII	X	XIV	-	-	-
Unaffected Individual	1	2	3	4	5	6
ID	SSC03286	SSC12483	MSSNG00047-005	5-0101-004	SSC12684	7-0666-005
Impact of deletion	PTCHD1-AS; DDX53	PTCHD1-AS; DDX53	PTCHD1-AS	PTCHD1-AS	PTCHD1-AS	PTCHD1-AS
Deletion coordinates (hg38)	chrX:22,983,958-23,049,986	chrX:22,962,365-23,060,740	chrX:22,931,256-22,996,096	chrX:23,044,286-23,099,268	chrX:22,853,468-22,958,983	chrX:22,734,132-22,974,660
Deletion size (bp)	66029	98376	64841	54983	105516	240529
Age of recruitment (years)	not provided	not provided	6.5	11.75	not provided	2
ASD diagnosis	No	No	No	No	No	No
Intellectual Delay			No
IQ (test)			98 (Wechsler)
Other Neurodevelopmental Disorders			ADHD; Learning Disability			speech delay; delayed walking
Other medical conditions			hearing impairment; tonsils/adenoids removed
Family info	brother of SSC03274 (see Figure 1)	brother of SSC012475 (see Figure 1)	brother of MSSNG00047-003 and MSSNG00047-004 (see Figure 1)	affected sibling does not have the deletion and is not included in this manuscript	affected sibling does not have the deletion and is not included in this manuscript	affected sister (7-0666-003) and sister with ASD traits (7-0666-004) also have the deletion
