# Supplementary material for: An X-linked long non-coding RNA, PTCHD1-AS, regulates autistic behaviors in humans and in mice
Source: Research Square preprint supplement (doi:10.21203/rs.3.rs-5619348/v1), 2025-01-13
Supplement: Supplementary file 16 [file Supplementary Table 3.xlsx]

## Sheet: PTCHD1 n=22
Sample ID	Chr	Start hg38	End hg38	Size (bp)	Variant Type	Sex	Relation	Primary Phenotype	Secondary Phenotype	Complete Phenotype Details	Inheritance	Source	Other exonic variants
N-1	chrX	23346806	23393017	46211	DEL	M	Proband	DD/ID	ADHD, anxiety	GDD, LD, ADHD, anxiety	Unknown	Chaudhry et al., 2015	Suspected: bilateral syndactyle present in father and brothers (who did not have PTCHD1 variant)
Pt2	chrX	23377596	23469276	91680	DEL	M	Proband	DD/ID	Unknown	DD, ID	Unknown	Gambin et al., 2017	None
Decipher: 355306	chrX	23392987	23511918	118931	DEL	M	Proband	DD/ID	Unknown	ID	Unknown	DECIPHER; Ross et al., 2019	None
Decipher: 304632	chrX	23393017	23514202	121185	DEL	M	Proband	Other		Motor sterotype mannerisms, Aggressive behavior, Mandibular prognathia, Pectus excavatum, Sandal gap, Toe syndactyly, Abnormality of the dentition, Furrowed tongue, Hypotelorism, Myopia	Maternal	DECIPHER	GRCh37/hg19: 1:144035447-144860388 duplication
Decipher: 273905	chrX	23340158	23661238	321080	DEL	M	Proband	ASD/BAP + DD/ID		Autistic behavior, Global developmental delay	Maternal	DECIPHER	None
PMID: 38007613 (index)	chrX	g.23394007T > G	NM_173495: c.2489T > G: p.I830R		MIS	M	Proband	ASD/BAP + DD/ID	motor impairment	Autistic behaviour, long philtrum, retrognathia, anteverted nares, long face, Scaphocephaly, Sparse hair, Single transverse palmar crease, Global developmental delay, Central hypotonia, Horizontal Nystagmus, Delayed gross motor development, Muscular hypotonia	Unknown	Farley K, et al., 2024	None
PMID: 33856728 (Patient 2)	chrX	g.23334970C > G	NM_173495.3: c.95C > G: p.P32R		MIS	M	Proband	ASD/BAP + DD/ID	motor impairment	ID, ASD, congenital ataxia (normal brain MRI at 2 years old)	Maternal	Halewa J et al., 2021	None
A-2	chrX	g.23,393,646del	NM_173495.3: c.2128delC: p.L710Cfs*12		LOF	M	Uncle	ASD/BAP		ASD (ID not tested)	Maternal	Chaudhry et al., 2015	None
A-1	chrX	g.23,393,646del	NM_173495.3: c.2128delC: p.L710Cfs*12		LOF	M	Proband	ASD/BAP + DD/ID		ASD, GDD, ID	Maternal	Chaudhry et al., 2015	None
Decipher: 259242	chrX	g.23393589C>T	NM_173495.3: c.2017C>T: p>R691X		LOF	M	Proband	DD/ID		GDD, long phlitrum, wide mouth, blue sclerae, deeply set eye	de novo	Decipher	COL1A1, -1bp fs; 3 FANCA SNVs, c.364C​>T; c.237C​>G, c.70C​>T; p.Arg24Cys (24 R/C) p.Asp79Glu (79 D/E) p.Arg122Trp (122 R/W) NM_000088.4 c.1127​del p.Pro376LeufsTer165 (376 P/X) 46XY
O-1	chrX	g.23393314dup	NM_173495.3: c.1796dup: p.N599Kfs*8		LOF	M	Proband	DD/ID	motor impairment	GDD, ID (mild), Tourette's, hyperkinetic disorder, anxiety disorder, sleep disorder, hypotonia; mild scoliosis	Maternal	Chaudhry et al., 2015	None
O-2	chrX	g.23393314dup	NM_173495.3: c.1796dup: p.N599Kfs*8		LOF	M	Affected Sibling	DD/ID		GDD, hyperactivity, aggressive outbursts, social ticks, avoids social interaction	Maternal	Chaudhry et al., 2015	None
Decipher: 318071	chrX	g.23393209_ 23393210del	NM_173495.3: c.1691_1692del: p.I564Rfs*6		LOF	M	Proband	DD/ID		ID	Unknown	Decipher	None
Decipher: 521399	chrX	g.23392742del	NM_173495.3: c.1224del: p.I408Mfs*18		LOF	M	Proband	ASD/BAP + DD/ID		autism, autistic behaviour, ID (moderate), thin skin, abnormal midface morphology, anteverted nares, U-shaped upper lip vermilion, wide mouth	Maternal	Decipher	None
Decipher: 263331 [Alt ID: P1]	chrX	g.23392962del	NM_173495.3: c.1444del: p.L482Yfs*14		LOF	M	Proband	DD/ID	motor impairment	Aggressive behaviour, drooling, gait disturbance, GDD, sleep disturbance, exzema, abnormal face shape, constipation	de novo	Decipher; Chaudhry et al., 2015	None
Decipher: 284361	chrX	g.23334970C>G	NM_173495.3: c.95C>G: p.P32R		MIS	M	Proband	ASD/BAP		Autisitic behaviour, 2-3 toe syndactyly, short distal phalanx of the thumb, synophrys, abnormal vitreous humor morphology	de novo	Decipher	WASF SNV; c.1364T​>C 46XY p.Leu455Pro (455 L/P)
Decipher: 284363	chrX	g.23334970C>G	NM_173495.3: c.95C>G: p.P32R		MIS	M	Proband	ASD/BAP + DD/ID		Autisitic behaviour, cognitive impairment	Maternal	Decipher	None
SP0131665	chrX	g.23335078del	NM_173495.3: c.203del: p.N68Tfs*47		LOF	M	Proband	ASD/BAP + DD/ID	speech impairment; motor impairment	ASD, cognitive impairment, learning disability, motor delay, Social (Pragmatic) Communication Disorder, Speech articulation problems, feeding problems, anxiety disorder, sleep disorder	Maternal	SPARK-WES1	None
SP0202099	chrX	g.23392696dup	NM_173495.3: c.1178dup: p.T394Hfs*4		LOF	M	Proband	ASD/BAP + DD/ID	speech impairment	ASD, cognitive impairment, non-verbal, Intermittent Explosive Disorder, learning disabilty, eating problems, Disruptive Mood Dysregulation Disorder, Schizophrenia	Unknown	SPARK-WES2	None
PMID: 38288059 (Alt ID: II-1 F1)	chrX	23383292	23463336	80045	DEL	M	Proband	ASD/BAP + DD/ID	speech impairment	psychomotor delay, ID, ASD, mixed emotions, conduct severe disorder, required speech therapy	Maternal	Montanaro et al., 2024	None
ClinVar: 417957	chrX	g.23380146G > A	NM_173495.3: c.907G>A: p.G303R		MIS	M	Proband	ASD/BAP		Autism	Maternal	Xie et al., 2024; ClinVar	None
PMID: 38275824 (Ptchd1-base.com)	chrX	g.23393164T > G	NM_173495.3: c.1646T>G: p.F549C		MIS	M	Proband	ASD/BAP		ASD	Unknown	Xie et al., 2024	None

## Sheet: PTCHD1+PTCHD1-AS n=31
Sample ID	Chr	Start (hg38)	End (hg38)	Size	Variant Type	Sex	Relation	Primary Phenotype	Secondary Phenotype	Additional phenotype details	Inheritance	Source	Other locus variants	Other exonic variants
F-1 [Alt ID: GOLD540]	chrX	23310970	23401172	90202	DEL	M	Affected Uncle	DD/ID		ID (moderate), relative macrocephaly	Maternal	Noor et al., 2010; Chaudhry et al., 2015; Ross et al., 2019	PTCHD1	Not detected by microarray
F-2 [Alt ID: GOLD540]	chrX	23310970	23401172	90202	DEL	M	Proband	DD/ID		GDD, ID (mild-to-moderate), relative macrocephaly	Maternal	Noor et al., 2010; Chaudhry et al., 2015; Ross et al., 2019	PTCHD1	Not detected by microarray
F-3 [Alt ID: GOLD540]	chrX	23310970	23401172	90202	DEL	M	Affected Sibling	DD/ID	motor impairment; ADD	GDD, ID (mild), gross motor delay, mild ADD	Maternal	Noor et al., 2010; Chaudhry et al., 2015; Ross et al., 2019	PTCHD1	Not detected by microarray
Pt1	chrX	23251335	23346803	95468	DEL	M	Proband	ASD/BAP + DD/ID	speech impairment; motor impairment; ADHD	ASD, DD, ID, ADHD, hypotonia, speech impairment	Maternal	Gambin et al.,2017	PTCHD1	None
Decipher: 269115	chrX	23251135	23355161	104026	DEL	M	Proband	ASD/BAP + DD/ID	seizures	Abnormal repetitive mannerisms, Atypical behaviour, ID, Seizures, Scoloiosis, short stature, slender build, deeply set eyes	Unknown	DECIPHER; Ross et al., 2019	PTCHD1	HIKESHIP1 pseudogene
Decipher: 339831	chrX	23283565	23393046	109481	DEL	M	Proband	DD/ID		ID	Unknown	DECIPHER; Ross et al., 2019	PTCHD1	HIKESHIP1 pseudogene
41001411216958	chrX	23237876	23373694	135818	DEL	M	Proband	DD/ID	speech impairment; motor impairment	Delayed milestones, speech and language deficits, cerebral palsy, GDD	Unknown	Lineagen	PTCHD1	None
D-1	chrX	23218889	23365235	146346	DEL	M	Proband	DD/ID	motor impairment	GDD (moderate), microcephaly, increased muscle tone in upper extremities	Unknown	Chaudhry et al., 2015	PTCHD1	Not detected by microarray
1-0186-004 [Alt ID: Prb1; 5240; G-2]	chrX	23185883	23353883	168001	DEL	M	Proband	ASD/BAP + DD/ID	motor impariment; ADHD	ASD, GDD, mild hypotonia, sensory integration dysfunction, ADHD-features, learning disability, recurrent nosebleeds and ear infections; IQ: 79	Maternal	MSSNG; Noor et al., 2010; Chaudhry et al., 2015; Ross et al., 2019	PTCHD1	None, WGS
1-0186-005 [Alt ID: 5240; G-1]	chrX	23185883	23353883	168001	DEL	M	Affected Sibling	ASD/BAP + DD/ID	language impairment; motor impairment	ASD; Developmental Delay; IQ:73; language delay; communication problems; mild dystaxia; wide based gait; mild ataxia; distal extremeties slightly hypotonic	Maternal	MSSNG; Noor et al., 2010; Chaudhry et al., 2015; Ross et al., 2019	PTCHD1	None, WGS
B-1	chrX	23255106	23452387	197281	DEL	M	Proband	ASD/BAP + DD/ID	motor impairment	ASD, GDD, ID (severe), relative macrocephaly, hypotonia, gait disturbance	Maternal	Chaudhry et al., 2015	PTCHD1	Not detected by microarray
B-2	chrX	23255106	23452387	197281	DEL	M	Affected Sibling	DD/ID	motor impairment	GDD, ID (severe), anxiety, hypotonia, gait disturbance	Maternal	Chaudhry et al., 2015	PTCHD1	Not detected by microarray
Pt3	chrX	23122620	23342353	219733	DEL	M	Proband	ASD/BAP + DD/ID	ADHD	Autistic features, DD, ID, ADHD	Unknown	Gambin et al.,2017	PTCHD1	Not detected PCR + Sanger
Decipher: 275039	chrX	23217178	23445718	228540	DEL	M	Proband	DD/ID	speech impairment; motor impairment	Delayed speech and language, motor delay, post-natal growth retardation, malar flatterning, pointed chin, clinodactyly of the 5th finger	Maternal	DECIPHER	PTCHD1	None
E-1	chrX	23092817	23393046	300229	DEL	M	Proband	DD/ID	motor impairment	GDD (mild), broad based gait	Unknown	Chaudhry et al., 2015	PTCHD1	Not detected by microarray
L-1	chrX	23178211	23507226	329015	DEL	M	Proband	ASD/BAP + DD/ID		ASD, mild ID (IQ 60-70), mood swings, aggressive behaviour, impulsivity, global developmental delay	Unknown	Chaudhry et al., 2015	PTCHD1	1.1Mb dupli- cation at 16p13.11 (chr16: 15,417,030-16,529,801; hg19)
MC-7	chrX	23130134	23355688	225555	DEL	M	Proband	ASD/BAP		ASD	Unknown	Mayo Clinic	PTCHD1	None
MC-10	chrX	23333253	23431718	98466	DEL	M	Proband	ASD/BAP		behavior disorder	Unknown	Mayo Clinic	PTCHD1	None
MC-11 [ALT ID: nssv582942]	chrX	23052089	23365234	313146	DEL	M	Proband	Other	motor impairment	cerebral palsy	Unknown	Mayo Clinic	PTCHD1	None
TCAG-1	chrX	23284002	23381905	97904	DEL	M	Proband	DD/ID		mild ID, GDD, mild microcephaly, cataract	Unknown	TCAG-unpublished	PTCHD1	None
PMID: 21091464 (Index)	chrX	23255106	23452387	197282	DEL	M	Proband	ASD/BAP + DD/ID	speech impairment; motor impairment	Autistic features, GDD, hypotonia, absent or severely limited speech	Maternal	Rothlisberger et al., 2010	PTCHD1	None
I-1 (Alt ID: DECIPHER: 267889]	chrX	23313067	23586129	273062	DEL	M	Proband	DD/ID	motor impairment	Intellectual disability, motor delay (isolated), hypotonic face, increase in tone in arms and legs	Unknown	Chaudhry et al., 2015, DECIPHER	PTCHD1	Not detected by microarray
1-0779-003	chrX	22646202	23812280	1166079	DEL	M	Proband	ASD/BAP + DD/ID		ASD, ID	De novo	MSSNG; Ross et al., 2019	DDX53 + PTCHD1	None
J-1	chrX	23146305	23558115	411810	DEL	M	Proband	ASD/BAP + DD/ID	motor impairment	BAP, GDD, hypotonic face, hypotonia	De novo	Chaudhry et al., 2015	PTCHD1 + DDX53	None
Decipher: 322903	chrX	23075012	23511918	436906	DEL	M	Proband	ASD/BAP	motor impairment	severe stereotypy, balance disorder, ASD	De novo	DECIPHER; Ross et al., 2019	PTCHD1	None
Decipher: 291517	chrX	23146305	23634173	487868	DEL	M	Proband	ASD/BAP + DD/ID		moderate ID, ASD (DECIPHER: moderate GDD, ASD)	Unknown	DECIPHER; Ross et al., 2019	PTCHD1	DUP; Chr18:363234-825146 affecting 10 genes; Del also affects PDCL2P1, HIKESHIP1 pseudogene GRCh38 (461.91kb)
H-1	chrX	22942626	23445220	502594	DEL	M	Proband	DD/ID		GDD, hypotonic face	Unknown	Chaudhry et al., 2015	PTCHD1 + DDX53	None
Decipher: 248781	chrX	22818207	23393046	574839	DEL	M	Proband	DD/ID	hyperactivity	GDD + hyperactivity (not tested for ASD)	Maternal	DECIPHER; Ross et al., 2019	PTCHD1 + DDX53	None
C-1	chrX	22543121	23344359	801238	DEL	M	Proband	ASD/BAP + DD/ID		GDD, BAP, hypotonic face	Maternal	Chaudhry et al., 2015	PTCHD1 + DDX53	None
C-2	chrX	22543121	23344359	801238	DEL	M	Affected Sibling	DD/ID		GDD, ID (mild), hypotonic face	Maternal	Chaudhry et al., 2015	PTCHD1 + DDX53	None
M-1	chrX	22377522	23340296	962774	DEL	M	Proband	ASD/BAP	speech impairment; motor impairment	ASD, motor delay (fine), speech delay, dysmorphic facial features	Unknown	Chaudhry et al., 2015	PTCHD1 + DDX53	654kb deletion at 1q21.2 (chr1: 147,986,516-148,640,398; hg19)

## Sheet: PTCHD1-AS n=65
Sample ID	Chr	Start (hg38)	End (hg38)	Size (bp)	Variant Type	Sex	Relation	Primary Phenotype	Secondary Phenotype	Additional phenotype details	Inheritance	Source	Other locus variants	Other exonic variants
3253_004	chrX	22932186	22979416	47231	DEL	M	Proband	ASD/BAP	speech impairment	ASD, possible speech delay	Maternal	Noor et al., 2010; Ross et al., 2019	None	None
2-0225-003 [Alt ID: 5111_3]	chrX	22906987	22974643	67657	DEL	M	Proband	ASD/BAP + DD/ID	speech impairment; seizures	ASD, Leiter IQ:37, severe speech delay (uses single words), non-verbal, adaptive delay, seizure disorder	Maternal	MSSNG; Noor et al., 2010; Ross et al., 2019	None	None, WGS
2-0068-003 [Alt ID: 5065_3]	chrX	22933883	22995883	62000	DEL	M	Proband	ASD/BAP	motor impairment	ASD, obesity, adaptive delay, anxiety, depression, possible apraxia	Maternal	MSSNG; Noor et al., 2010; Ross et al., 2019	None	None, WGS
8013_04	chrX	22931256	22996098	64843	DEL	M	Affected Sibling	ASD/BAP		ASD, adaptive delay	Maternal	Noor et al., 2010; Ross et al., 2019	None	None
8013_05	chrX	22931256	22996098	64943	DEL	M	Sibling - other	Other	speech impairment	possible speech delay	Maternal	Noor et al., 2010; Ross et al., 2019	None	None
7-0342-003 [Alt ID 8527_001]	chrX	23027438	23111923	84487	DEL	M	Proband	ASD/BAP + DD/ID	ADD	premature, growth restiction, precocious puberty, global ability profoundly delayed, impaired adaptive behaviour, ADD, Aberrant behaviour disorder,advanced bone age	Maternal	MSSNG ; D'Abate et al., 2019; Ross et al., 2019	None	None, WGS
7-0342-004 [Alt ID: 8527_005]	chrX	23027438	23111923	84487	DEL	M	Affected Sibling	ASD/BAP + DD/ID	ADD	premature, ID, dyslexia, possible seizure disorder, ADHD, Aberrant Behaviour disorder, short term memory disorder	Maternal	MSSNG ; D'Abate et al., 2019; Ross et al., 2019	None	None, WGS
7-0342-005 [Alt ID: 8527_004]	chrX	23027438	23111923	84487	DEL	M	Affected Sibling	ASD/BAP + DD/ID	language impairment; motor impairment	Global ablity severe impairment, IQ:62 Mullen, very low range in expressive and receptive language, very low range in fine motor and visual reception, apraxia, Aberrant behaviour disorder	Maternal	MSSNG ; D'Abate et al., 2019; Ross et al., 2019	None	None, WGS
8273_004	chrX	23061294	23163042	101749	DEL	M	Affected Sibling	ASD/BAP		ASD	Maternal	Noor et al., 2010; Ross et al., 2019	None	None
3424_003	chrX	23083681	23188174	104494	DEL	M	Proband	ASD/BAP		ASD	Maternal	Noor et al., 2010; Ross et al., 2019	None	None
Decipher: 361039	chrX	22849435	22969676	120242	DEL	M	Proband	Other	speech impairment	Delayed speech and language, Abnormal facial shape, Abnormal shape of the frontal region, Dolichocephaly	Maternal	DECIPHER; Ross et al., 2019	None	None
7-0107-003	chrX	22900750	23057030	156281	DEL	M	Proband	ASD/BAP		ASD	Maternal	Ross et al., 2019	None	None
Decipher: 366514	chrX	22420437	22618682	198246	DEL	M	Proband	DD/ID	seizures	Global developmental delay, Hearing abnormality, Hearing impairment, Seizures	Unknown	DECIPHER-February 2019	None	METTL15P3, PHEX, RNU6-266P; Chr 14, 14:89804911-90795029 impact 14 genes
12215.p1	chrX	22780786	22989661	208876	DEL	M	Proband	ASD/BAP		ASD	Maternal	SSC; Ross et al., 2019	None	None
3387_1	chrX	22896458	23109470	213013	DEL	M	Affected Father	ASD/BAP		BAP	Unknown	Pinto et al., 2014	None	None
Decipher: 283500	chrX	22708734	22942683	233950	DEL	M	Proband	ASD/BAP	speech impairment; ADHD	ASD with high cognitive abilities, ADHD, delayed speech & language development, moderate specifical learning disability, ptosis, downslated palpebral fissures, overlapping toe, delayed walking	Unknown	DECIPHER; Ross et al., 2019	None	None
MC-8	chrX	22824476	23142353	317878	DEL	M	Proband	ASD/BAP	seizures	prematurity, oppositional defiant disorder, obsessive compulsive disorder, seizures, cerebral, venous angioma, relatives with similar histories, neurobehavioral disorder	maternal	Mayo Clinic	None	None
MC-5	chrX	22902102	23286674	384573	DEL	M	Proband	ASD/BAP		pervasive developmental disorder, family history of neurological diseases	Unknown	Mayo Clinic	None	None
MC-2	chrX	23015022	23298513	283492	DEL	M	Proband	ASD/BAP	speech impairment; ADD	query ASD, speech delay, ADD, macrocephaly, oppositional defiant disorder	Unknown	Mayo Clinic	None	None
MC-4	chrX	22611021	23236588	625568	DEL	M	Proband	ASD/BAP		ASD	Unknown	Mayo Clinic	None	None
MC-13	chrX	22708737	23013878	305142	DEL	M	Proband	Other		Delayed milestones	Maternal	Mayo Clinic	None	None
MC-15	chrX	22797762	23103990	306229	DEL	M	Proband	DD/ID		developmental disorder	Maternal	Mayo Clinic	None	None
16076_1571045001	chrX	22840443	23205910	365468	DEL	M	Proband	ASD/BAP		ASD	Unknown	Pinto et al., 2014	None	None
SSC05753 [Alt ID: 12417.p1]	chrX	22528471	22581413	52943	DEL	M	Proband	ASD/BAP		ASD, IQ:89, otitis media, abnormal shape polydactyly, bowel disorder	Maternal	SSC; Ross et al., 2019	None	None
MSSNG00206-003	chrX	22712230	22748044	35800	DEL	M	Proband	ASD/BAP		ASD, IQ:80 Mullen	Maternal	MSSNG	None	None, WGS
5-5021-003	chrX	22836616	22938099	101484	DEL	M	Proband	ASD/BAP	motor impairment	ASD, macrocephaly, mild difficulties with nonverbal communication, gross and fine motor skills moderately delayed for age	Maternal	MSSNG	None	None, WGS
MSSNG00047-003	chrX	22931256	22996096	64841	DEL	M	Proband	ASD/BAP	ADHD	ASD, ADHD, tubes in ears, asthma	Maternal	MSSNG	None	SATB1, p.R385X, paternal
MSSNG00047-004	chrX	22931256	22996096	64841	DEL	M	Affected Sibling	ASD/BAP	seizures; ADHD	ASD, febrile seizures; ADHD; anxiety features; partial agenesis of the corpus callosum; asthma	Maternal	MSSNG	None	SATB1, p.R385X, paternal
MSSNG00047-005	chrX	22931256	22996096	64841	DEL	M	Sibling - other	Other	ADHD	ADHD; LD; tubes in ears; tonsils/adenoids removed	Maternal	MSSNG	None	SATB1, p.R385X, paternal
SP0134243	chrX	22888146	22921743	33598	DEL	M	Proband	ASD/BAP + DD/ID		ASD, cognitive impairment	Maternal	SPARK-WGS1	None	None, WGS
6-0607-003	chrX	22954727	23114777	160151	DEL	M	Proband	DD/ID	ADHD	mild ID, suspected psychotic disorder, no suspicion of ASD	de novo	TCAG-unpublished	None	None
IPG-1	chrX	22942627	23075071	132444	DEL	M	Proband	DD/ID		ID	de novo	Centre for Human Genetics of IPG in Belgium	None	None
TCAG-2	chrX	22797941	22987987	190046	DEL	M	Proband	DD/ID		Developmental delay	Unknown	TCAG-unpublished	None	None
Decipher: 424484	chrX	22734247	22818266	84020	DEL	M	Proband	DD/ID	speech impairment	GDD, delayed speech and language, abnormality of the face	Maternal	Decipher	None	None
7-0507-003	chrX	22853468	22958983	105515	DEL	M	Proband	ASD/BAP		ASD	Maternal	MSSNG	None	None
PMID: 32947579 (Index)	chrX	22802723	23110651	307929	DEL	M	Proband	ASD/BAP	ADHD	ASD, Significant neurodevelopmental delays, severe sleep disorder, Features of Fragile X (also has de novo pathogenic variant in FMR1, p.C77Afs*5), hyperactivity, inattention	Maternal	Saldarriaga W et al., 2020	None	yes, FMR1
SP0301210	chrX	22899643	22959936	60294	DEL	M	Proband	ASD/BAP	ADHD	eating problems	Maternal	SPARK-WGS4	None	None, WGS
SSC09667 [Alt ID 14690.p1]	chrX	22929726	22978865	49140	DEL	M	Proband	ASD/BAP	seizures	ASD, IQ: 75, non-febrile seizures, gastrointestinal issues	Maternal	SSC	None	None, WGS
SP0297238	chrX	22929726	22978865	49140	DEL	M	Proband	ASD/BAP			Maternal	SPARK-WGS4	None	None, WGS
Decipher: 366498	chrX	22942627	23075071	132445	DEL	M	Proband	ASD/BAP		ASD		DECIPHER	DDX53	None
Decipher: 281838	chrX	22818207	23003550	185344	DEL	M	Proband	DD/ID	motor impairment	Hereditary spastic paraplegia with bradykinesia, dysplasia of the corpus collosum, ID, GDD	Maternal	DECIPHER; Ross et al., 2019	DDX53	None
Decipher: 361037	chrX	22915415	23103990	188576	DEL	M	Proband	ASD/BAP	speech impairment	Atypical behaviour (abnormality of mental functioning including various affective, behavioral, cognitive, and perceptual abnormalities), delayed speech and language development	Maternal	DECIPHER; Ross et al., 2019	DDX53	FAM3C2P (pseduogene)
Decipher: 288239	chrX	22942131	23146318	204188	DEL	M	Proband	DD/ID	speech impairment	GDD, delayed speech and language	De novo	DECIPHER; Ross et al., 2019	DDX53	FAM3C2P (pseduogene)
Decipher: 332045	chrX	22818207	23052148	233942	DEL	M	Proband	Other	seizures	developmental regression, infantile spasms	Unknown	DECIPHER	DDX53	Chr 12 3 gene dup, Chr 3 dup; DELS: Chr 15, intronic, Chr 4, 2 genes
Decipher: 326597	chrX	22797762	23052148	254387	DEL	M	Proband	DD/ID	speech impairment; seizures; hyperactivity	delayed speech & language, GDD, ID, hyperactivity, neonatal hypertonia, macrocephaly, recurrent bronchospasms, previous febrile convulsions, dysmorphisms	Maternal	DECIPHER; Ross et al., 2019	DDX53	None
Decipher: 351929	chrX	22845036	23113551	268516	DEL	M	Proband	Other		Split foot, split hand	Unknown	DECIPHER	DDX53	Chr X FAM3C2P pseduogene DEL; DUPs: Chr 18 2 genes, Chr 10 14 genes
Decipher: 361042	chrX	22975373	23283624	308252	DEL	M	Proband	Other		Hypoplastic left heart	Maternal	DECIPHER	DDX53	Chr X DUP: 4 genes; ChrX DEL:2 pseudo genes
Decipher: 249968	chrX	22709566	23165800	456235	DEL	M	Proband	DD/ID	motor impairment	ID, visual impairment, microcephaly, gait disturbance	Maternal	DECIPHER	DDX53	Chr X FAM3C2P pseduogene
Decipher: 451712	chrX	22942627	23121779	179153	DEL	M	Proband	DD/ID		ID	Maternal	Decipher	DDX53	Chr X FAM3C2P pseduogene
Decipher: 435888	chrX	23000300	23075071	74772	DEL	M	Proband	ASD/BAP		Abnormal social behaviour	Maternal	Decipher	DDX53	None
SSC03274 [Alt ID. 11158.p1]	chrX	22983958	23049986	66029	DEL	M	Proband	ASD/BAP + DD/ID	OCD	ASD, obesity, IQ:55, Anxiety Disorder, OCD, environmental allergies, asthma	Maternal	SSC; Ross et al., 2019	DDX53	None
1-0277-003 [Alt ID.Prb2; 5298_3]	chrX	22962601	23073200	110600	DEL	M	Proband	ASD/BAP + DD/ID	speech impairment; motor impairment	ASD, severe speech delay, ID, apraxia (classify under fine motor), adaptive delay	Maternal	MSSNG; Noor et al., 2010; Ross et al., 2019	DDX53	None
1-0767-003	chrX	22896629	23054893	158265	DEL	M	Proband	ASD/BAP	seizures; ADHD	ASD, high average learning abilities, Oppositional defiant disorder, seizures reported on ADI, ADHD, anxiety, learning disorder, OCD	Unknown	MSSNG; Ross et al., 2019	DDX53	None
SSC05744 [Alt ID: 12670.p1]	chrX	22895001	23066200	171200	DEL	M	Proband	ASD/BAP		IQ:106, Anxiety Disorder, Depressive Disorder, vision corrected, allergies	Maternal	SSC; Ross et al., 2019	DDX53	None
7-0393-003	chrX	22824476	23142353	317878	DEL	M	Proband	ASD/BAP	motor impairment; seizures; ADHD	Autistic features, Disruptive Behaviour Disorder, ADHD; fine motor delay; hypotonic at birth; seizures; mild dysmorphic features	maternal	MSSNG; Ross et al., 2019	DDX53	None
12561.p1	chrX	22932186	23286674	354489	DEL	M	Proband	ASD/BAP		ASD	De novo	SSC; Ross et al., 2019	DDX53	None
7-0391-003	chrX	22731442	23094915	363474	DEL	M	Proband	ASD/BAP		BAP	Unknown	MSSNG	DDX53	None
SSC12475 [Alt ID 14564.p1]	chrX	22962365	23060740	98376	DEL	M	Proband	ASD/BAP	speech impairment; ADHD	ASD, IQ:94, speech delay, pragmatic language disorder, stuttering, mixed expressive disorder, ADHD, otits media, congenital heart defect, environmental allergies, food allergies, asthma, bowel disorders, autoimmune disorder, psoriasis, migraines	Maternal	SSC	DDX53	None
13047_563	chrX	22901145	23286674	385530	DEL	M	Proband	ASD/BAP		ASD; Proband (deletion) = Autism (based on ADI & ADOS). No epilepsy, history of language delay followed by a rapid language learning progression. Average to above average Non-Verbal and Verbal IQ.	Maternal	Noor et al., 2010; Ross et al., 2019	DDX53	None
1-27075_3	chrX	22750776	23138781	388006	DEL	M	Proband	ASD/BAP	speech impairment; ADHD	BAP (social deficits only), ADHD, non-verbal learning disability	Maternal	Noor et al., 2010; Ross et al., 2019	DDX53	None
SP0227006	chrX	22893817	23002458	106844	DEL	M	Proband	ASD/BAP + DD/ID	speech impairment	ASD, cognitive impairment, adaptive level low, non-verbal	Maternal	SPARK-WGS3	DDX53	None
nssv13654080	chrX	23000300	23075012	74712	DEL	M	Proband	DD/ID		Developmental delay AND/OR other significant developmental or morphological phenotypes (yes)	Unknown	ClinVar: ISCA Site 6; Miller et al., 2010.	DDX53	None
nssv585174	chrX	22774924	23081201	306277	DEL	M	Proband	DD/ID		Developmental delay AND/OR other significant developmental or morphological phenotypes	Unknown	ClinVar: GeneDx	DDX53	None
7-0662-003	chrX	22764435	23086262	321829	DEL	M	Proband	ASD/BAP		asthma	Maternal	MSSNG	DDX53	None
7-0666-005	chrX	22751428	22973183	221756	DEL	M	Proband	Other	speech impairment	delays with speech and walking, early signs of ASD not endorsed	Maternal	MSSNG

## Sheet: Source
Publication/ Data Source	PMID/ link
Chaudhry A, Noor A, Degagne B, Baker K, Bok LA, Brady AF, Chitayat D, Chung BH, Cytrynbaum C, Dyment D, Filges I, Helm B, Hutchison HT, Jeng LJ, Laumonnier F, Marshall CR, Menzel M, Parkash S, Parker MJ; DDD Study; Raymond LF, Rideout AL, Roberts W, Rupps R, Schanze I, Schrander-Stumpel CT, Speevak MD, Stavropoulos DJ, Stevens SJ, Thomas ER, Toutain A, Vergano S, Weksberg R, Scherer SW, Vincent J…	25131214
D'Abate L, Walker S, Yuen RKC, Tammimies K, Buchanan JA, Davies RW, Thiruvahindrapuram B, Wei J, Brian J, Bryson SE, Dobkins K, Howe J, Landa R, Leef J, Messinger D, Ozonoff S, Smith IM, Stone WL, Warren ZE, Young G, Zwaigenbaum L, Scherer SW. Predictive impact of rare genomic copy number variations in siblings of individuals with autism spectrum disorders. Nat Commun. 2019 Dec 5;10(1):5519.	31801954
Farley KO, Forbes CA, Shaw NC, Kuzminski E, Ward M, Baynam G, Lassmann T, Fear VS. CRISPR-Cas9-generated PTCHD1 2489T>G stem cells recapitulate patient phenotype when undergoing neural induction. HGG Adv. 2024 Jan 11;5(1):100257.	38007613
Filges I, Röthlisberger B, Blattner A, Boesch N, Demougin P, Wenzel F, Huber AR, Heinimann K, Weber P, Miny P. Deletion in Xp22.11: PTCHD1 is a candidate gene for X-linked intellectual disability with or without autism. Clin Genet. 2011 Jan;79(1):79-85.	21091464
Gambin T, Yuan B, Bi W, Liu P, Rosenfeld JA, Coban-Akdemir Z, Pursley AN, Nagamani SCS, Marom R, Golla S, Dengle L, Petrie HG, Matalon R, Emrick L, Proud MB, Treadwell-Deering D, Chao HT, Koillinen H, Brown C, Urraca N, Mostafavi R, Bernes S, Roeder ER, Nugent KM, Bader PI, Bellus G, Cummings M, Northrup H, Ashfaq M, Westman R, Wildin R, Beck AE, Immken L, Elton L, Varghese S, Buchanan E, Faivre …	28934986
Halewa J, Marouillat S, Dixneuf M, Thépault RA, Ung DC, Chatron N, Gérard B, Ghoumid J, Lesca G, Till M, Smol T, Couque N, Ruaud L, Chune V, Grotto S, Verloes A, Vuillaume ML, Toutain A, Raynaud M, Laumonnier F. Novel missense mutations in PTCHD1 alter its plasma membrane subcellular localization and cause intellectual disability and autism spectrum disorder. Hum Mutat. 2021 Jul;42(7):848-861.	33856728
Montanaro FAM, Mandarino A, Alesi V, Schwartz C, Sepulveda DJC, Skinner C, Friez M, Piccolo G, Novelli A, Zanni G, Dentici ML, Vicari S, Alfieri P. PTCHD1 gene mutation/deletion: the cognitive-behavioral phenotyping of four case reports. Front Psychiatry. 2024 Jan 15;14:1327802.	38288059
Noor A, Whibley A, Marshall CR, Gianakopoulos PJ, Piton A, Carson AR, Orlic-Milacic M, Lionel AC, Sato D, Pinto D, Drmic I, Noakes C, Senman L, Zhang X, Mo R, Gauthier J, Crosbie J, Pagnamenta AT, Munson J, Estes AM, Fiebig A, Franke A, Schreiber S, Stewart AF, Roberts R, McPherson R, Guter SJ, Cook EH Jr, Dawson G, Schellenberg GD, Battaglia A, Maestrini E; Autism Genome Project Consortium; Jeng…	20844286
Pinto D, Pagnamenta AT, Klei L, Anney R, Merico D, Regan R, Conroy J, Magalhaes TR, Correia C, Abrahams BS, Almeida J, Bacchelli E, Bader GD, Bailey AJ, Baird G, Battaglia A, Berney T, Bolshakova N, Bölte S, Bolton PF, Bourgeron T, Brennan S, Brian J, Bryson SE, Carson AR, Casallo G, Casey J, Chung BH, Cochrane L, Corsello C, Crawford EL, Crossett A, Cytrynbaum C, Dawson G, de Jonge M, Delorme R,…	20531469
Ross PJ, Zhang WB, Mok RSF, Zaslavsky K, Deneault E, D'Abate L, Rodrigues DC, Yuen RKC, Faheem M, Mufteev M, Piekna A, Wei W, Pasceri P, Landa RJ, Nagy A, Varga B, Salter MW, Scherer SW, Ellis J. Synaptic Dysfunction in Human Neurons With Autism-Associated Deletions in PTCHD1-AS. Biol Psychiatry. 2020 Jan 15;87(2):139-149.	31540669
Saldarriaga W, Payán-Gómez C, González-Teshima LY, Rosa L, Tassone F, Hagerman RJ. Double Genetic Hit: Fragile X Syndrome and Partial Deletion of Protein Patched Homolog 1 Antisense as Cause of Severe Autism Spectrum Disorder. J Dev Behav Pediatr. 2020 Dec;41(9):724-728.	32947579
Xie CTY, Pastore SF, Vincent JB, Frankland PW, Hamel PA. Nonsynonymous Mutations in Intellectual Disability and Autism Spectrum Disorder Gene PTCHD1 Disrupt N-Glycosylation and Reduce Protein Stability. Cells. 2024 Jan 21;13(2):199.	38275824
Centre for Human Genetics of IPG in Belgium	contact authors
ClinVar	https://www.ncbi.nlm.nih.gov/clinvar/
Decipher	https://www.deciphergenomics.org/
Lineagen	contact authors
Mayo Clinic	contact authors
MSSNG	https://research.mss.ng/
SPARK (Simons Foundation Powering Autism Research)	https://www.sfari.org/resource/spark/
SSC: Simon's Simplex Collection	https://www.sfari.org/resource/simons-simplex-collection/
TCAG-unpublished	contact authors
