# Supplementary material for: An X-linked long non-coding RNA, PTCHD1-AS, regulates autistic behaviors in humans and in mice
Source: Research Square preprint supplement (doi:10.21203/rs.3.rs-5619348/v1), 2025-01-13
Supplement: Supplementary file 19 [file Supplementary Table 5.xlsx]

## Sheet: KO
GeneStableID	GeneID	Chr.Start.End	GeneName	GeneType	MGI_ID	log2FoldChange	lfcSE	stat	pvalue	padj	ASD.Gene	SFARI.Score	EAGLE.Annotation	TADA.FDR
ENSMUSG00000001911	ENSMUSG00000001911.17	chr8:85426505-85526973	Nfix	protein_coding	MGI:97311	-0.0948063	0.0362021	-2.6188	0.00882387	0.168509	NFIX	S
ENSMUSG00000001985	ENSMUSG00000001985.10	chr4:125384493-125607966	Grik3	protein_coding	MGI:95816	0.114275	0.0388526	2.94124	0.00326903	0.0928247	GRIK3	2
ENSMUSG00000001986	ENSMUSG00000001986.17	chrX:40489731-40767478	Gria3	protein_coding	MGI:95810	0.0731934	0.0293689	2.4922	0.0126953	0.19844	GRIA3	S
ENSMUSG00000004347	ENSMUSG00000004347.18	chr6:56046789-56629472	Pde1c	protein_coding	MGI:108413	0.109638	0.053029	2.06752	0.0386852	0.337141	PDE1C	2
ENSMUSG00000005043	ENSMUSG00000005043.14	chr11:119234251-119246362	Sgsh	protein_coding	MGI:1350341	-0.134388	0.0635729	-2.11392	0.0345219	0.32024	SGSH	S
ENSMUSG00000005917	ENSMUSG00000005917.16	chr11:21944764-21952897	Otx1	protein_coding	MGI:97450	-0.222141	0.108305	-2.05106	0.0402607	0.341742	OTX1	2
ENSMUSG00000007440	ENSMUSG00000007440.11	chr18:37138256-37320710	Pcdha10	protein_coding	MGI:1298408	0.333563	0.121041	2.75578	0.00585522	0.13288	PCDHA12	2
ENSMUSG00000007617	ENSMUSG00000007617.19	chr13:93436143-93541637	Homer1	protein_coding	MGI:1347345	0.102218	0.0366319	2.79042	0.00526395	0.123793	HOMER1	2
ENSMUSG00000007653	ENSMUSG00000007653.13	chr11:42310584-42519855	Gabrb2	protein_coding	MGI:95620	0.161625	0.0537257	3.00834	0.00262683	0.0815321	GABRB2	1	Limited (score=0.3)
ENSMUSG00000009376	ENSMUSG00000009376.16	chr6:17463799-17573979	Met	protein_coding	MGI:96969	-0.554344	0.16972	-3.26623	0.00108989		MET	2
ENSMUSG00000009394	ENSMUSG00000009394.14	chr6:115111863-115258967	Syn2	protein_coding	MGI:103020	0.0965374	0.0309546	3.11867	0.00181667	0.0663647	SYN2	2
ENSMUSG00000009569	ENSMUSG00000009569.15	chr16:13074345-13235393	Mrtfb	protein_coding	MGI:3050795	0.113111	0.0461972	2.44844	0.0143474	0.211708	MRTFB	2
ENSMUSG00000013523	ENSMUSG00000013523.14	chr2:170188911-170269765	Bcas1	protein_coding	MGI:1924210	-0.200624	0.0448356	-4.47465	7.65351e-06	0.00155522	BCAS1	2
ENSMUSG00000013663	ENSMUSG00000013663.8	chr19:32734897-32803560	Pten	protein_coding	MGI:109583	0.0923602	0.035956	2.5687	0.0102081	0.179429	PTEN	1	Definitive (score=63.15)	0
ENSMUSG00000015002	ENSMUSG00000015002.19	chr15:65658883-65745665	Efr3a	protein_coding	MGI:1923990	-0.0815313	0.0387971	-2.10148	0.0355991	0.324642	EFR3A	2
ENSMUSG00000015305	ENSMUSG00000015305.7	chr10:8597983-8761814	Sash1	protein_coding	MGI:1917347	-0.0889636	0.0423018	-2.10307	0.0354596	0.324527	SASH1	2
ENSMUSG00000016194	ENSMUSG00000016194.15	chr1:192903942-192946383	Hsd11b1	protein_coding	MGI:103562	-0.25466	0.0773162	-3.29375	0.00098861	0.0457355	HSD11B1	2
ENSMUSG00000016346	ENSMUSG00000016346.18	chr2:180717372-180777093	Kcnq2	protein_coding	MGI:1309503	0.0784483	0.0338514	2.31743	0.0204801	0.250036	KCNQ2	2
ENSMUSG00000017485	ENSMUSG00000017485.12	chr14:6034301-6104584	Top2b	protein_coding	MGI:98791	0.0690788	0.0316897	2.17985	0.0292686	0.299175	TOP2B	2
ENSMUSG00000018501	ENSMUSG00000018501.18	chr11:62207252-62349367	Ncor1	protein_coding	MGI:1349717	0.0894113	0.0385971	2.31653	0.0205293	0.250036	NCOR1	2
ENSMUSG00000019558	ENSMUSG00000019558.15	chrX:72716756-72726108	Slc6a8	protein_coding	MGI:2147834	-0.069089	0.0334959	-2.06261	0.0391496	0.337141	SLC6A8	2
ENSMUSG00000019790	ENSMUSG00000019790.18	chr10:9631291-9776823	Stxbp5	protein_coding	MGI:1926058	0.0963623	0.0398697	2.41693	0.015652	0.223312	STXBP5	2
ENSMUSG00000019831	ENSMUSG00000019831.15	chr10:40759471-40814566	Wasf1	protein_coding	MGI:1890563	0.11522	0.0349533	3.2964	0.000979329	0.0455536	WASF1	S
ENSMUSG00000019873	ENSMUSG00000019873.9	chr10:66844968-66932724	Reep3	protein_coding	MGI:88930	-0.090379	0.0343386	-2.632	0.00848844	0.164764	REEP3	2
ENSMUSG00000019986	ENSMUSG00000019986.18	chr10:20828446-20956328	Ahi1	protein_coding	MGI:87971	0.115535	0.0333699	3.46224	0.000535702	0.0296996	AHI1	S
ENSMUSG00000020124	ENSMUSG00000020124.11	chr10:122940911-123032900	Usp15	protein_coding	MGI:101857	0.0884011	0.0308446	2.86602	0.00415674	0.109779	USP15	2
ENSMUSG00000020231	ENSMUSG00000020231.16	chr10:76095263-76181125	Dip2a	protein_coding	MGI:2385920	-0.103044	0.0370754	-2.7793	0.0054477	0.125839	DIP2A	1
ENSMUSG00000020273	ENSMUSG00000020273.14	chr11:23812646-23845253	Papolg	protein_coding	MGI:2442119	0.0928492	0.0445466	2.08432	0.0371313	0.329619	PAPOLG	2		0.06482319
ENSMUSG00000020290	ENSMUSG00000020290.15	chr11:23206041-23248249	Xpo1	protein_coding	MGI:2144013	0.0814236	0.0412677	1.97306	0.0484889	0.370504	XPO1	2
ENSMUSG00000020524	ENSMUSG00000020524.17	chr11:56902213-57221070	Gria1	protein_coding	MGI:95808	0.0904176	0.0323715	2.79312	0.00522018	0.123206	GRIA1	2
ENSMUSG00000020598	ENSMUSG00000020598.17	chr12:44375668-44648747	Nrcam	protein_coding	MGI:104750	0.103961	0.039131	2.65675	0.00788985	0.159948	NRCAM	2
ENSMUSG00000020647	ENSMUSG00000020647.11	chr12:4297362-4527182	Ncoa1	protein_coding	MGI:1276523	0.085624	0.037163	2.30401	0.021222	0.253244	NCOA1	1	Limited (score=3)
ENSMUSG00000020654	ENSMUSG00000020654.16	chr12:4183103-4263525	Adcy3	protein_coding	MGI:99675	0.0763093	0.033477	2.27945	0.0226401	0.261487	ADCY3	2
ENSMUSG00000020758	ENSMUSG00000020758.16	chr11:115865535-115899238	Itgb4	protein_coding	MGI:96613	-0.228976	0.0499308	-4.58587	4.521e-06	0.0011005	ITGB4			0.02412214
ENSMUSG00000020882	ENSMUSG00000020882.18	chr11:97892334-97913860	Cacnb1	protein_coding	MGI:102522	0.0783575	0.0329518	2.37794	0.0174096	0.233414	CACNB1	3
ENSMUSG00000020932	ENSMUSG00000020932.15	chr11:102778162-102791738	Gfap	protein_coding	MGI:95697	-0.290751	0.0519109	-5.60097	2.13155e-08	2.52008e-05	GFAP	1	Limited (score=0.3)
ENSMUSG00000021143	ENSMUSG00000021143.11	chr12:112978128-113038021	Pacs2	protein_coding	MGI:1924399	-0.122338	0.0342911	-3.56764	0.000360218	0.0216881	PACS2	S
ENSMUSG00000021156	ENSMUSG00000021156.18	chr13:9734869-9815366	Zmynd11	protein_coding	MGI:1913755	0.0626432	0.0281636	2.22427	0.0261306	0.281389	ZMYND11	2
ENSMUSG00000021198	ENSMUSG00000021198.17	chr12:102915118-103150324	Unc79	protein_coding	MGI:2684729	0.102768	0.0471511	2.17955	0.0292906	0.299175	UNC79	2
ENSMUSG00000021255	ENSMUSG00000021255.18	chr12:86407891-86568402	Esrrb	protein_coding	MGI:1346832	-0.378882	0.168913	-2.24306	0.0248926		ESRRB	2
ENSMUSG00000021712	ENSMUSG00000021712.16	chr13:104315305-104339880	Trim23	protein_coding	MGI:1933161	0.0878572	0.0355316	2.47265	0.0134116	0.206167	TRIM23	1
ENSMUSG00000022048	ENSMUSG00000022048.9	chr14:67040313-67106137	Dpysl2	protein_coding	MGI:1349763	-0.114191	0.0367872	-3.1041	0.00190861	0.0678183	DPYSL2	1	Limited (score=1)	0.09395911
ENSMUSG00000022112	ENSMUSG00000022112.15	chr14:115329647-116762591	Gpc5	protein_coding	MGI:1194894	-0.0835116	0.0413443	-2.0199	0.0433933	0.353261	GPC5	3
ENSMUSG00000022261	ENSMUSG00000022261.7	chr15:32920869-33035081	Sdc2	protein_coding	MGI:1349165	0.0722883	0.0341388	2.11748	0.0342187	0.319236	SDC2	2
ENSMUSG00000022321	ENSMUSG00000022321.16	chr15:18819033-19014322	Cdh10	protein_coding	MGI:107436	0.0911509	0.0424171	2.14892	0.0316407	0.308925	CDH10	2
ENSMUSG00000022479	ENSMUSG00000022479.16	chr15:97752306-97808511	Vdr	protein_coding	MGI:103076	-0.574425	0.246593	-2.32944	0.0198356		VDR	2
ENSMUSG00000022705	ENSMUSG00000022705.6	chr16:43574389-43643295	Drd3	protein_coding	MGI:94925	0.656794	0.169327	3.87884	0.000104955		DRD3	2
ENSMUSG00000022973	ENSMUSG00000022973.19	chr16:90732980-90808196	Synj1	protein_coding	MGI:1354961	0.103431	0.0369084	2.80238	0.00507263	0.122433	SYNJ1	2
ENSMUSG00000023809	ENSMUSG00000023809.11	chr17:7437514-7570714	Rps6ka2	protein_coding	MGI:1342290	0.142173	0.0388869	3.65607	0.000256108	0.0181015	RPS6KA2	2
ENSMUSG00000023927	ENSMUSG00000023927.16	chr17:52043215-52140318	Satb1	protein_coding	MGI:105084	-0.106213	0.0452046	-2.3496	0.0187937	0.239555	SATB1	1	Limited (score=2.5)
ENSMUSG00000024042	ENSMUSG00000024042.8	chr17:32063224-32074778	Sik1	protein_coding	MGI:104754	0.134327	0.0674931	1.99023	0.0465651	0.364113	SIK1	S
ENSMUSG00000024268	ENSMUSG00000024268.17	chr18:25610689-25887214	Celf4	protein_coding	MGI:1932407	0.0572509	0.0287937	1.98831	0.0467771	0.364273	CELF4	1	Moderate (score=8.5)	0.02087285
ENSMUSG00000024548	ENSMUSG00000024548.12	chr18:78793595-79152606	Setbp1	protein_coding	MGI:1933199	0.194206	0.0480752	4.03962	5.35386e-05	0.00632972	SETBP1	1
ENSMUSG00000024593	ENSMUSG00000024593.16	chr18:57266162-57430539	Megf10	protein_coding	MGI:2685177	-0.151969	0.0619606	-2.45267	0.0141799	0.210514	MEGF10	2
ENSMUSG00000024855	ENSMUSG00000024855.11	chr19:5183186-5323147	Pacs1	protein_coding	MGI:1277113	0.0862951	0.0401978	2.14676	0.0318123	0.309902	PACS1	1	Limited (score=1.35)
ENSMUSG00000024921	ENSMUSG00000024921.18	chr19:26582450-26755722	Smarca2	protein_coding	MGI:99603	0.0749542	0.0298904	2.50763	0.0121544	0.195087	SMARCA2	1
ENSMUSG00000024935	ENSMUSG00000024935.12	chr19:28812449-28891360	Slc1a1	protein_coding	MGI:105083	0.0681324	0.0295169	2.30825	0.020985	0.25153	SLC1A1	2
ENSMUSG00000025370	ENSMUSG00000025370.8	chr15:16728842-16857180	Cdh9	protein_coding	MGI:107433	0.108922	0.0516765	2.10777	0.035051	0.322375	CDH9	2
ENSMUSG00000025529	ENSMUSG00000025529.15	chrX:111510223-111544767	Zfp711	protein_coding	MGI:3045342	0.132969	0.064594	2.05854	0.0395386	0.337965	ZNF711	2
ENSMUSG00000025531	ENSMUSG00000025531.15	chrX:111950290-112095214	Chm	protein_coding	MGI:892979	0.0791622	0.0389589	2.03194	0.0421597	0.349005	CHM	3
ENSMUSG00000025551	ENSMUSG00000025551.14	chr14:124215319-124914539	Fgf14	protein_coding	MGI:109189	0.0846382	0.0352072	2.404	0.0162167	0.227507	FGF14	3
ENSMUSG00000025656	ENSMUSG00000025656.18	chrX:94092541-94240462	Arhgef9	protein_coding	MGI:2442233	0.092157	0.0319309	2.88614	0.00389997	0.105665	ARHGEF9	1	Definitive (score=14.2)
ENSMUSG00000025658	ENSMUSG00000025658.17	chrX:156604432-156826290	Cnksr2	protein_coding	MGI:2661175	0.205028	0.0480488	4.26708	1.98052e-05	0.00306626	CNKSR2	2
ENSMUSG00000025878	ENSMUSG00000025878.17	chr13:55175693-55248113	Uimc1	protein_coding	MGI:103185	-0.141348	0.0642984	-2.19831	0.0279272	0.293371	UIMC1	2
ENSMUSG00000026077	ENSMUSG00000026077.16	chr1:39232812-39402317	Npas2	protein_coding	MGI:109232	0.0720064	0.0342944	2.09965	0.0357594	0.324984	NPAS2	2
ENSMUSG00000026102	ENSMUSG00000026102.10	chr1:52824586-52856847	Inpp1	protein_coding	MGI:104848	0.0791433	0.0388927	2.03492	0.0418593	0.347866	INPP1	2
ENSMUSG00000026170	ENSMUSG00000026170.7	chr1:74752733-74777051	Cyp27a1	protein_coding	MGI:88594	-0.334687	0.0803254	-4.16664	3.0912e-05	0.00418761	CYP27A1	S
ENSMUSG00000026173	ENSMUSG00000026173.16	chr1:74582047-74606953	Plcd4	protein_coding	MGI:107469	-0.148998	0.0700381	-2.12738	0.0333881	0.316482	PLCD4	2
ENSMUSG00000026175	ENSMUSG00000026175.13	chr1:74448535-74474718	Vil1	protein_coding	MGI:98930	-0.463843	0.196088	-2.36548	0.0180067		VIL1	2
ENSMUSG00000026596	ENSMUSG00000026596.14	chr1:156386356-156477138	Abl2	protein_coding	MGI:87860	0.0920783	0.0442394	2.08137	0.0374004	0.331105	ABL2	3
ENSMUSG00000026620	ENSMUSG00000026620.12	chr1:184628986-184731767	Mark1	protein_coding	MGI:2664902	0.074995	0.0295222	2.54029	0.0110761	0.186302	MARK1	2
ENSMUSG00000026830	ENSMUSG00000026830.10	chr2:57935125-57942876	Ermn	protein_coding	MGI:1925017	-0.188628	0.0480591	-3.92493	8.67553e-05	0.0084198	ERMN	2
ENSMUSG00000026904	ENSMUSG00000026904.18	chr2:61876806-62157074	Slc4a10	protein_coding	MGI:2150150	0.103566	0.0355407	2.91402	0.00356812	0.0993649	SLC4A10	2
ENSMUSG00000027002	ENSMUSG00000027002.14	chr2:80330856-80411724	Nckap1	protein_coding	MGI:1355333	0.0827046	0.0252763	3.27202	0.00106781	0.0480274	NCKAP1	1
ENSMUSG00000027030	ENSMUSG00000027030.16	chr2:68040789-68302612	Stk39	protein_coding	MGI:1858416	-0.0817842	0.035378	-2.31172	0.0207929	0.251078	STK39	2
ENSMUSG00000027167	ENSMUSG00000027167.12	chr2:105531372-105734909	Elp4	protein_coding	MGI:1925016	0.116892	0.0556335	2.10111	0.0356314	0.324642	ELP4	2
ENSMUSG00000027199	ENSMUSG00000027199.15	chr2:122424948-122441784	Gatm	protein_coding	MGI:1914342	-0.191637	0.0460793	-4.15886	3.19841e-05	0.00424442	GATM	S
ENSMUSG00000027434	ENSMUSG00000027434.12	chr2:147019466-147036163	Nkx2-2	protein_coding	MGI:97347	-0.186132	0.0944969	-1.96971	0.0488715	0.371086	NKX2-2	3
ENSMUSG00000028565	ENSMUSG00000028565.19	chr4:97660971-98007111	Nfia	protein_coding	MGI:108056	-0.0841706	0.0425389	-1.97868	0.0478526	0.368239	NFIA	2
ENSMUSG00000028664	ENSMUSG00000028664.15	chr4:136374850-136563299	Ephb2	protein_coding	MGI:99611	-0.147919	0.0564593	-2.61993	0.00879479	0.168448	EPHB2	2
ENSMUSG00000029084	ENSMUSG00000029084.6	chr5:44025895-44069717	Cd38	protein_coding	MGI:107474	-0.169512	0.0859639	-1.97189	0.0486219	0.370917	CD38	2
ENSMUSG00000029211	ENSMUSG00000029211.12	chr5:71727092-71815651	Gabra4	protein_coding	MGI:95616	0.100712	0.0429634	2.34413	0.0190715	0.241277	GABRA4	2
ENSMUSG00000029309	ENSMUSG00000029309.8	chr5:104226977-104261599	Sparcl1	protein_coding	MGI:108110	-0.106321	0.0340873	-3.11907	0.0018142	0.0663647	SPARCL1	2
ENSMUSG00000029629	ENSMUSG00000029629.18	chr6:11907808-12081204	Phf14	protein_coding	MGI:1923539	0.101516	0.0396278	2.56174	0.0104149	0.181078	PHF14	3
ENSMUSG00000029832	ENSMUSG00000029832.17	chr6:51409650-51435748	Nfe2l3	protein_coding	MGI:1339958	-0.176544	0.0887403	-1.98945	0.0466517	0.364113	NFE2L3	2
ENSMUSG00000030465	ENSMUSG00000030465.20	chr8:68141734-68664679	Psd3	protein_coding	MGI:1918215	0.12795	0.0445792	2.87017	0.00410249	0.109756	PSD3	2
ENSMUSG00000031202	ENSMUSG00000031202.6	chrX:74615652-74621837	Rab39b	protein_coding	MGI:1915040	0.0796706	0.0391248	2.03632	0.0417182	0.347866	RAB39B	2
ENSMUSG00000031292	ENSMUSG00000031292.15	chrX:159554919-159777700	Cdkl5	protein_coding	MGI:1278336	0.108911	0.0440981	2.46974	0.0135211	0.20663	CDKL5	1
ENSMUSG00000031592	ENSMUSG00000031592.11	chr8:41692789-41785381	Pcm1	protein_coding	MGI:1277958	0.105489	0.0482583	2.18592	0.0288212	0.298186	PCM1	2
ENSMUSG00000031642	ENSMUSG00000031642.10	chr8:61676906-61849105	Sh3rf1	protein_coding	MGI:1913066	0.178249	0.0554735	3.21323	0.00131249	0.0540157	SH3RF1	3
ENSMUSG00000031772	ENSMUSG00000031772.18	chr8:113296675-113609349	Cntnap4	protein_coding	MGI:2183572	0.151041	0.0608073	2.48394	0.0129939	0.202135	CNTNAP4	2
ENSMUSG00000032076	ENSMUSG00000032076.21	chr9:47441471-47769413	Cadm1	protein_coding	MGI:1889272	0.124184	0.0404801	3.06777	0.00215659	0.0722848	CADM1	2
ENSMUSG00000032193	ENSMUSG00000032193.10	chr9:21634779-21661215	Ldlr	protein_coding	MGI:96765	-0.129413	0.0617548	-2.09559	0.0361187	0.325745	LDLR	3
ENSMUSG00000032384	ENSMUSG00000032384.17	chr9:65816206-65952297	Csnk1g1	protein_coding	MGI:2660884	0.112918	0.0363668	3.10498	0.00190293	0.0678183	CSNK1G1	3
ENSMUSG00000032487	ENSMUSG00000032487.9	chr1:149975782-149983978	Ptgs2	protein_coding	MGI:97798	0.441505	0.0898797	4.91218	9.00699e-07	0.000422014	PTGS2	2
ENSMUSG00000033214	ENSMUSG00000033214.11	chr14:111912529-111920573	Slitrk5	protein_coding	MGI:2679448	0.0810995	0.0354817	2.28567	0.0222735	0.259083	SLITRK5	2
ENSMUSG00000033676	ENSMUSG00000033676.14	chr7:57069440-57478550	Gabrb3	protein_coding	MGI:95621	0.120585	0.0332996	3.62121	0.000293231	0.0187902	GABRB3	1
ENSMUSG00000033981	ENSMUSG00000033981.15	chr3:80588757-80710142	Gria2	protein_coding	MGI:95809	0.105608	0.0289725	3.64511	0.00026728	0.0182946	GRIA2	1	Definitive (score=12)	0.06663618
ENSMUSG00000034390	ENSMUSG00000034390.17	chr8:117983803-118186169	Cmip	protein_coding	MGI:1921690	0.0955133	0.0315785	3.02463	0.00248941	0.0786363	CMIP	2
ENSMUSG00000035342	ENSMUSG00000035342.15	chr19:45002853-45015550	Lzts2	protein_coding	MGI:2385095	-0.117644	0.0507047	-2.32017	0.0203317	0.249446	LZTS2	2
ENSMUSG00000035653	ENSMUSG00000035653.17	chr12:61569936-61905128	Lrfn5	protein_coding	MGI:2144814	0.0865998	0.0355458	2.43629	0.0148387	0.216343	LRFN5	2
ENSMUSG00000035722	ENSMUSG00000035722.16	chr10:79832328-79851406	Abca7	protein_coding	MGI:1351646	-0.13503	0.0547575	-2.46596	0.0136648	0.207596	ABCA7	2
ENSMUSG00000035954	ENSMUSG00000035954.11	chr12:40495951-40896873	Dock4	protein_coding	MGI:1918006	0.118486	0.0288104	4.1126	3.91221e-05	0.00493965	DOCK4	2
ENSMUSG00000036192	ENSMUSG00000036192.16	chr19:18907969-19088560	Rorb	protein_coding	MGI:1343464	-0.162741	0.063602	-2.55874	0.0105052	0.182034	RORB	1	Moderate (score=8.25)	4.77E-07
ENSMUSG00000036510	ENSMUSG00000036510.18	chr8:99751103-100143103	Cdh8	protein_coding	MGI:107434	0.114092	0.0346153	3.29598	0.000980777	0.0455536	CDH8	2
ENSMUSG00000036686	ENSMUSG00000036686.17	chr8:84859457-84874565	Cc2d1a	protein_coding	MGI:2384831	0.0719574	0.0336813	2.13642	0.0326452	0.31286	CC2D1A	2
ENSMUSG00000036792	ENSMUSG00000036792.13	chr2:48839520-49215417	Mbd5	protein_coding	MGI:2138934	0.12019	0.0468137	2.56741	0.0102463	0.179586	MBD5	1	LoF curation: Definitive (score=46.6); Duplication curation: Moderate (score=8.5)	0.00025868
ENSMUSG00000036815	ENSMUSG00000036815.18	chr1:123249200-124773776	Dpp10	protein_coding	MGI:2442409	0.110279	0.0440807	2.50176	0.0123579	0.196009	DPP10	2
ENSMUSG00000037217	ENSMUSG00000037217.16	chrX:20726750-20787243	Syn1	protein_coding	MGI:98460	0.0678444	0.0287364	2.36092	0.0182295	0.238046	SYN1	1	Limited (score=2.35)
ENSMUSG00000037286	ENSMUSG00000037286.16	chr9:100479851-100841428	Stag1	protein_coding	MGI:1098658	0.0808406	0.0385651	2.09621	0.0360633	0.325745	STAG1	S
ENSMUSG00000037370	ENSMUSG00000037370.14	chr10:24513812-24588057	Enpp1	protein_coding	MGI:97370	-0.13806	0.0653746	-2.11183	0.0347007	0.320733	ENPP1	3
ENSMUSG00000037426	ENSMUSG00000037426.19	chr5:33021045-33151580	Depdc5	protein_coding	MGI:2141101	0.0800283	0.0406274	1.96981	0.0488601	0.371086	DEPDC5	S
ENSMUSG00000037541	ENSMUSG00000037541.23	chr7:143555665-143978231	Shank2	protein_coding	MGI:2671987	0.127631	0.0495593	2.57531	0.0100151	0.178017	SHANK2	1	Definitive (score=18.55)	0.00016496
ENSMUSG00000038119	ENSMUSG00000038119.16	chr9:35332424-35418948	Cdon	protein_coding	MGI:1926387	0.195098	0.0699624	2.78861	0.00529351	0.123817	CDON	3
ENSMUSG00000038128	ENSMUSG00000038128.8	chr18:33067984-33324281	Camk4	protein_coding	MGI:88258	0.150322	0.0537482	2.79679	0.00516128	0.122751	CAMK4	2
ENSMUSG00000038583	ENSMUSG00000038583.14	chr10:53213763-53222083	Pln	protein_coding	MGI:97622	-0.3943	0.14827	-2.65934	0.00782945		PLN	2
ENSMUSG00000038822	ENSMUSG00000038822.16	chr10:45453925-45588441	Hace1	protein_coding	MGI:2446110	0.0941649	0.0354615	2.65542	0.00792108	0.160208	HACE1	3
ENSMUSG00000039000	ENSMUSG00000039000.9	chr5:29774240-29881090	Ube3c	protein_coding	MGI:2140998	0.0736943	0.0308306	2.3903	0.0168348	0.230389	UBE3C	2
ENSMUSG00000039197	ENSMUSG00000039197.11	chr14:21102642-21498637	Adk	protein_coding	MGI:87930	-0.0910017	0.0417706	-2.1786	0.0293611	0.299175	ADK	2
ENSMUSG00000039904	ENSMUSG00000039904.10	chr6:25665877-25690728	Gpr37	protein_coding	MGI:1313297	-0.205008	0.041996	-4.8816	1.05226e-06	0.000456157	GPR37	2
ENSMUSG00000039967	ENSMUSG00000039967.15	chr4:34803113-34882960	Zfp292	protein_coding	MGI:1353423	0.104729	0.0518037	2.02165	0.0432122	0.353261	ZNF292	1
ENSMUSG00000040037	ENSMUSG00000040037.14	chr3:156267431-157022082	Negr1	protein_coding	MGI:2444846	0.071927	0.0322841	2.22794	0.0258846	0.280291	NEGR1	2
ENSMUSG00000040407	ENSMUSG00000040407.19	chr5:3978054-4131310	Akap9	protein_coding	MGI:2178217	0.108383	0.0536645	2.01965	0.0434199	0.353261	AKAP9	2
ENSMUSG00000040732	ENSMUSG00000040732.21	chr16:95160028-95387452	Erg	protein_coding	MGI:95415	-0.149934	0.0711621	-2.10694	0.0351226	0.3227	ERG	2
ENSMUSG00000040896	ENSMUSG00000040896.17	chr3:105359646-105581318	Kcnd3	protein_coding	MGI:1928743	0.101634	0.0463986	2.19046	0.0284911	0.296725	KCND3	2
ENSMUSG00000040929	ENSMUSG00000040929.18	chr19:27739121-27988566	Rfx3	protein_coding	MGI:106582	0.152159	0.0560347	2.71545	0.00661856	0.145396	RFX3	1	Definitive (score=15.95)	0.00128045
ENSMUSG00000041115	ENSMUSG00000041115.17	chrX:150927264-151008232	Iqsec2	protein_coding	MGI:3528396	0.0804004	0.040798	1.97069	0.0487592	0.371086	IQSEC2	1
ENSMUSG00000041235	ENSMUSG00000041235.13	chr4:8690406-8867659	Chd7	protein_coding	MGI:2444748	-0.0927025	0.0457031	-2.02836	0.0425231	0.35112	CHD7	1	Moderate (score=8.1)
ENSMUSG00000041245	ENSMUSG00000041245.14	chrX:149981074-150103148	Wnk3	protein_coding	MGI:2652875	0.123446	0.0502544	2.45642	0.0140328	0.209383	WNK3	2
ENSMUSG00000041444	ENSMUSG00000041444.15	chr9:32027432-32179742	Arhgap32	protein_coding	MGI:2450166	0.182116	0.042161	4.31955	1.56351e-05	0.00267545	ARHGAP32	2
ENSMUSG00000041624	ENSMUSG00000041624.11	chr9:3532778-3894736	Gucy1a2	protein_coding	MGI:2660877	0.263236	0.0856338	3.07397	0.0021123	0.0717955	GUCY1A2	2
ENSMUSG00000041773	ENSMUSG00000041773.9	chr13:97377613-97389542	Enc1	protein_coding	MGI:109610	0.107528	0.0382833	2.80874	0.0049736	0.120738	ENC1			0.04791803
ENSMUSG00000041852	ENSMUSG00000041852.16	chr15:82692637-82872073	Tcf20	protein_coding	MGI:108399	0.0968016	0.0421656	2.29575	0.0216902	0.25675	TCF20	1	Definitive (score = 38)	9.63E-05
ENSMUSG00000042662	ENSMUSG00000042662.17	chr2:152782917-152793618	Dusp15	protein_coding	MGI:1934928	-0.123148	0.0488107	-2.52298	0.0116366	0.190174	DUSP15	2
ENSMUSG00000043531	ENSMUSG00000043531.17	chr19:50131737-50667084	Sorcs1	protein_coding	MGI:1929666	0.101524	0.0454574	2.23339	0.0255229	0.277664	SORCS1		Limited (score=0.25)
ENSMUSG00000044288	ENSMUSG00000044288.7	chr4:33924593-33948831	Cnr1	protein_coding	MGI:104615	0.107598	0.052727	2.04066	0.0412851	0.345726	CNR1	2
ENSMUSG00000044708	ENSMUSG00000044708.6	chr1:172168777-172201652	Kcnj10	protein_coding	MGI:1194504	-0.172652	0.0445662	-3.87405	0.000107041	0.0100148	KCNJ10	2
ENSMUSG00000045414	ENSMUSG00000045414.8	chr9:94399917-94420134	Dipk2a	protein_coding	MGI:1916111	0.106003	0.0448217	2.36499	0.0180303	0.237573	DIPK2A	2
ENSMUSG00000046178	ENSMUSG00000046178.4	chr6:8948431-9249032	Nxph1	protein_coding	MGI:107492	-0.0842761	0.0396421	-2.12593	0.0335094	0.3171	NXPH1	2
ENSMUSG00000046240	ENSMUSG00000046240.9	chr9:37278647-37297871	Hepacam	protein_coding	MGI:1920177	-0.11228	0.0312676	-3.59094	0.000329488	0.0205023	HEPACAM	S
ENSMUSG00000046982	ENSMUSG00000046982.12	chr18:84029752-84105831	Tshz1	protein_coding	MGI:1346031	0.117015	0.0438398	2.66916	0.00760416	0.156215	TSHZ1			0.0023426
ENSMUSG00000047495	ENSMUSG00000047495.16	chr8:14145865-14897680	Dlgap2	protein_coding	MGI:2443181	0.156904	0.0376348	4.16911	3.05792e-05	0.00418613	DLGAP2	2	Limited (score=2.8)
ENSMUSG00000048216	ENSMUSG00000048216.14	chr6:13834457-13839941	Gpr85	protein_coding	MGI:1927851	0.106033	0.04095	2.58934	0.00961607	0.174905	GPR85	2
ENSMUSG00000048264	ENSMUSG00000048264.17	chr13:9326564-9718964	Dip2c	protein_coding	MGI:1920179	0.0844036	0.0361101	2.33739	0.0194187	0.243529	DIP2C	2
ENSMUSG00000049583	ENSMUSG00000049583.16	chr7:87233376-87784115	Grm5	protein_coding	MGI:1351342	0.112084	0.0425132	2.63645	0.00837792	0.164394	GRM5	2
ENSMUSG00000050587	ENSMUSG00000050587.15	chr2:96148514-97462011	Lrrc4c	protein_coding	MGI:2442636	0.092568	0.0318687	2.90466	0.00367647	0.101729	LRRC4C	1	Limited (score=1.25)
ENSMUSG00000050822	ENSMUSG00000050822.12	chr5:142678267-142708245	Slc29a4	protein_coding	MGI:2385330	-0.196803	0.0841604	-2.33843	0.0193647	0.243322	SLC29A4	2
ENSMUSG00000050965	ENSMUSG00000050965.15	chr11:107824213-108234754	Prkca	protein_coding	MGI:97595	0.138794	0.0445544	3.11516	0.00183847	0.0665995	PRKCA	2
ENSMUSG00000051177	ENSMUSG00000051177.17	chr2:134627987-135317178	Plcb1	protein_coding	MGI:97613	0.102593	0.0357039	2.87344	0.00406028	0.108874	PLCB1	2
ENSMUSG00000052516	ENSMUSG00000052516.20	chr16:73688727-74208713	Robo2	protein_coding	MGI:1890110	0.0809059	0.03716	2.17723	0.0294634	0.299175	ROBO2	2
ENSMUSG00000052534	ENSMUSG00000052534.16	chr1:167946933-168259839	Pbx1	protein_coding	MGI:97495	0.0829205	0.0383055	2.16472	0.0304093	0.302813	PBX1	2		0.0094427
ENSMUSG00000052572	ENSMUSG00000052572.20	chr7:90125880-92098455	Dlg2	protein_coding	MGI:1344351	0.0883211	0.0395313	2.23421	0.0254694	0.277644	DLG2	2
ENSMUSG00000052889	ENSMUSG00000052889.12	chr7:121887974-122233625	Prkcb	protein_coding	MGI:97596	0.0944695	0.040966	2.30604	0.0211082	0.252309	PRKCB	2
ENSMUSG00000053141	ENSMUSG00000053141.17	chr2:161363910-162503067	Ptprt	protein_coding	MGI:1321152	0.121989	0.0562552	2.1685	0.030121	0.301959	PTPRT	2
ENSMUSG00000055026	ENSMUSG00000055026.14	chr7:56366213-57036936	Gabrg3	protein_coding	MGI:95624	0.106187	0.0457402	2.32153	0.0202582	0.249123	GABRG3	2
ENSMUSG00000056755	ENSMUSG00000056755.14	chr6:110622542-111544191	Grm7	protein_coding	MGI:1351344	0.0885026	0.0349759	2.53039	0.0113936	0.188278	GRM7	2
ENSMUSG00000057914	ENSMUSG00000057914.16	chr2:14607899-14992719	Cacnb2	protein_coding	MGI:894644	0.146881	0.0508161	2.89044	0.00384704	0.104667	CACNB2	2
ENSMUSG00000058624	ENSMUSG00000058624.14	chr19:21368671-21450809	Gda	protein_coding	MGI:95678	0.191414	0.0435577	4.39449	1.11033e-05	0.00209273	GDA	2
ENSMUSG00000058975	ENSMUSG00000058975.8	chr7:46045921-46088128	Kcnc1	protein_coding	MGI:96667	-0.0936707	0.0436706	-2.14494	0.0319577	0.31067	KCNC1	2
ENSMUSG00000060012	ENSMUSG00000060012.10	chr14:64884714-65047066	Kif13b	protein_coding	MGI:1098265	-0.211283	0.0464368	-4.54991	5.36694e-06	0.00118525	KIF13B	2
ENSMUSG00000060988	ENSMUSG00000060988.13	chr2:54326329-55008321	Galnt13	protein_coding	MGI:2139447	0.110638	0.0440749	2.51023	0.0120654	0.194196	GALNT13	2
ENSMUSG00000061731	ENSMUSG00000061731.10	chr15:52927434-53209555	Ext1	protein_coding	MGI:894663	0.104357	0.0404427	2.58036	0.00986963	0.177041	EXT1	2
ENSMUSG00000061911	ENSMUSG00000061911.16	chr12:29578383-29973212	Myt1l	protein_coding	MGI:1100511	0.123257	0.0378102	3.25988	0.00111459	0.0484792	MYT1L	1	Definitive (score=20.35)	7.02E-08
ENSMUSG00000063434	ENSMUSG00000063434.7	chr19:48194464-48793944	Sorcs3	protein_coding	MGI:1913923	0.0992206	0.0457484	2.16883	0.0300953	0.301959	SORCS3	2
ENSMUSG00000064288	ENSMUSG00000064288.5	chr13:21934364-21934675	H4c12	protein_coding	MGI:2448439	0.309206	0.139035	2.22394	0.0261523		H4C5	S
ENSMUSG00000066415	ENSMUSG00000066415.5	chr9:100956154-100981999	Msl2	protein_coding	MGI:1925103	0.0686415	0.0339259	2.02328	0.0430443	0.353261	MSL2			0.07200134
ENSMUSG00000066687	ENSMUSG00000066687.6	chr9:48565597-48747522	Zbtb16	protein_coding	MGI:103222	0.363824	0.149958	2.42617	0.0152591	0.220005	ZBTB16	2
ENSMUSG00000067629	ENSMUSG00000067629.14	chr17:27160227-27191408	Syngap1	protein_coding	MGI:3039785	0.0825512	0.0373654	2.20929	0.0271542	0.288278	SYNGAP1	1	Definitive (score=40.75)	0
ENSMUSG00000068205	ENSMUSG00000068205.15	chr2:140237229-142234886	Macrod2	protein_coding	MGI:1920149	0.0924787	0.0322889	2.8641	0.0041819	0.110092	MACROD2	2
ENSMUSG00000069171	ENSMUSG00000069171.15	chr13:78337092-78347876	Nr2f1	protein_coding	MGI:1352451	-0.151598	0.0596119	-2.54308	0.0109881	0.185334	NR2F1	2
ENSMUSG00000069495	ENSMUSG00000069495.13	chr2:49341498-49441960	Epc2	protein_coding	MGI:1278321	0.0936818	0.0390953	2.39624	0.0165642	0.229901	EPC2	2
ENSMUSG00000071176	ENSMUSG00000071176.11	chr8:14961663-15051085	Arhgef10	protein_coding	MGI:2444453	-0.0991932	0.0429647	-2.30872	0.0209594	0.25153	ARHGEF10	2
ENSMUSG00000071659	ENSMUSG00000071659.5	chr19:8797374-8811507	Hnrnpul2	protein_coding	MGI:1915943	0.0586703	0.0279676	2.09779	0.0359233	0.325563	HNRNPUL2	2		0.05635658
ENSMUSG00000073411	ENSMUSG00000073411.13	chr17:35481706-35486475	H2-D1	protein_coding	MGI:95896	-0.128248	0.0503727	-2.54598	0.0108973	0.185012	HLA-A;HLA-B;HLA-G	2;2;2	NA;NA;NA	NA;NA;NA
ENSMUSG00000075318	ENSMUSG00000075318.14	chr2:65451115-65597791	Scn2a	protein_coding	MGI:98248	0.0948985	0.0426895	2.22299	0.0262163	0.281389	SCN2A	1	Definitive (score=109.3)	0
ENSMUSG00000102312	ENSMUSG00000102312.2	chr18:37079158-37320710	Pcdha3	protein_coding	MGI:2447313	0.221204	0.110637	1.99936	0.0455695		PCDHA3	2
ENSMUSG00000102697	ENSMUSG00000102697.2	chr18:37276556-37320710	Pcdhac2	protein_coding	MGI:1891443	0.12896	0.0506833	2.54443	0.0109455	0.185106	PCDHAC2	2
ENSMUSG00000103310	ENSMUSG00000103310.2	chr18:37153202-37320710	Pcdha12	protein_coding	MGI:1298370	0.334044	0.0729591	4.57851	4.68292e-06	0.0011005	PCDHA13	2
ENSMUSG00000103770	ENSMUSG00000103770.2	chr18:37130933-37320710	Pcdha9	protein_coding	MGI:2447322	0.245803	0.103087	2.38441	0.0171063	0.232463	PCDHA10	2
ENSMUSG00000104252	ENSMUSG00000104252.6	chr18:37085701-37320714	Pcdha4	protein_coding	MGI:1298406	0.315546	0.0725306	4.35052	1.35813e-05	0.00248767	PCDHA4	2
ENSMUSG00000104318	ENSMUSG00000104318.2	chr18:37106855-37320710	Pcdha7	protein_coding	MGI:1298369	0.261026	0.105597	2.47191	0.0134394		PCDHA7	2
ENSMUSG00000000120	ENSMUSG00000000120.7	chr11:95459644-95478561	Ngfr	protein_coding	MGI:97323	-0.586022	0.21862	-2.68055	0.00735012	0.153679
ENSMUSG00000000125	ENSMUSG00000000125.6	chr11:103664976-103708783	Wnt3	protein_coding	MGI:98955	-0.292398	0.110069	-2.65649	0.00789594	0.159948
ENSMUSG00000000149	ENSMUSG00000000149.11	chr5:140744163-140816186	Gna12	protein_coding	MGI:95767	-0.162668	0.0330779	-4.91773	8.75547e-07	0.000422014
ENSMUSG00000000197	ENSMUSG00000000197.9	chr14:123514046-123864556	Nalcn	protein_coding	MGI:2444306	0.0820525	0.0390991	2.09858	0.0358539	0.325295
ENSMUSG00000000339	ENSMUSG00000000339.15	chr3:116282612-116301857	Rtca	protein_coding	MGI:1913618	-0.0754884	0.0345426	-2.18537	0.0288616	0.298366
ENSMUSG00000000409	ENSMUSG00000000409.15	chr4:129442137-129467434	Lck	protein_coding	MGI:96756	0.284277	0.142523	1.99461	0.0460859
ENSMUSG00000000486	ENSMUSG00000000486.14	chr7:126813619-126832302	Septin1	protein_coding	MGI:1858916	-0.389541	0.148097	-2.63032	0.00853057
ENSMUSG00000000552	ENSMUSG00000000552.11	chr15:103222322-103248520	Zfp385a	protein_coding	MGI:1352495	-0.133394	0.0348709	-3.82537	0.000130578	0.0114741
ENSMUSG00000000594	ENSMUSG00000000594.8	chr11:54988941-55003855	Gm2a	protein_coding	MGI:95762	-0.0803807	0.0340247	-2.36242	0.018156	0.238046
ENSMUSG00000000740	ENSMUSG00000000740.13	chr8:123829089-123831983	Rpl13	protein_coding	MGI:105922	-0.0653217	0.028578	-2.28573	0.0222698	0.259083
ENSMUSG00000000751	ENSMUSG00000000751.14	chr11:75188992-75239150	Rpa1	protein_coding	MGI:1915525	-0.0730188	0.0335846	-2.17417	0.0296921	0.299887
ENSMUSG00000000753	ENSMUSG00000000753.16	chr11:75300595-75313527	Serpinf1	protein_coding	MGI:108080	-0.158194	0.0752701	-2.10169	0.0355807	0.324642
ENSMUSG00000000766	ENSMUSG00000000766.19	chr10:6708506-6988198	Oprm1	protein_coding	MGI:97441	0.369309	0.139002	2.65686	0.00788721
ENSMUSG00000000794	ENSMUSG00000000794.10	chr3:89427471-89582439	Kcnn3	protein_coding	MGI:2153183	0.198905	0.0660684	3.01059	0.00260742	0.0811232
ENSMUSG00000000881	ENSMUSG00000000881.13	chrX:99811328-99862016	Dlg3	protein_coding	MGI:1888986	0.0879799	0.0268139	3.28113	0.00103392	0.0471796
ENSMUSG00000000948	ENSMUSG00000000948.17	chr7:59623897-59654812	Gm38393	protein_coding	MGI:5613898	0.178429	0.0691386	2.58074	0.00985896	0.177041
ENSMUSG00000001103	ENSMUSG00000001103.8	chr11:78394273-78395907	Sebox	protein_coding	MGI:108012	0.37172	0.186366	1.99456	0.0460905
ENSMUSG00000001300	ENSMUSG00000001300.17	chr8:8667434-8711242	Efnb2	protein_coding	MGI:105097	0.133662	0.0370466	3.60794	0.000308643	0.019485
ENSMUSG00000001313	ENSMUSG00000001313.13	chr11:101355825-101362679	Rnd2	protein_coding	MGI:1338755	-0.108138	0.0381048	-2.8379	0.0045412	0.114233
ENSMUSG00000001323	ENSMUSG00000001323.18	chr11:74797185-74816774	Srr	protein_coding	MGI:1351636	0.137953	0.0329818	4.18269	2.88084e-05	0.00403465
ENSMUSG00000001334	ENSMUSG00000001334.10	chr4:129030792-129038386	Fndc5	protein_coding	MGI:1917614	-0.14938	0.050077	-2.983	0.00285439	0.0871393
ENSMUSG00000001376	ENSMUSG00000001376.18	chr6:3498382-3603531	Vps50	protein_coding	MGI:1920538	0.0786983	0.0333648	2.35873	0.0183378	0.238046
ENSMUSG00000001419	ENSMUSG00000001419.18	chr3:88049679-88079393	Mef2d	protein_coding	MGI:99533	0.0771833	0.0332218	2.32328	0.0201643	0.248566
ENSMUSG00000001542	ENSMUSG00000001542.8	chr13:75854876-75920483	Ell2	protein_coding	MGI:2183438	-0.121159	0.0411804	-2.94216	0.00325927	0.0927501
ENSMUSG00000001552	ENSMUSG00000001552.15	chr11:100259784-100288589	Jup	protein_coding	MGI:96650	-0.0761592	0.0352622	-2.1598	0.0307884	0.304489
ENSMUSG00000001700	ENSMUSG00000001700.11	chr18:56533409-56636864	Gramd3	protein_coding	MGI:1914815	-0.109424	0.053012	-2.06414	0.0390042	0.337141
ENSMUSG00000001786	ENSMUSG00000001786.15	chr10:85857836-85887737	Fbxo7	protein_coding	MGI:1917004	-0.11726	0.0366567	-3.19887	0.00137969	0.0560713
ENSMUSG00000001864	ENSMUSG00000001864.14	chr2:31840151-31863454	Aif1l	protein_coding	MGI:1919598	-0.145582	0.0641949	-2.26781	0.0233406	0.266735
ENSMUSG00000001988	ENSMUSG00000001988.10	chr7:16189646-16211653	Npas1	protein_coding	MGI:109205	-0.296758	0.104067	-2.85161	0.00434981	0.110955
ENSMUSG00000002017	ENSMUSG00000002017.11	chr17:75844081-75858941	Fam98a	protein_coding	MGI:1919972	-0.0984879	0.0434063	-2.26897	0.0232699	0.266395
ENSMUSG00000002052	ENSMUSG00000002052.7	chr11:78097572-78136813	Supt6	protein_coding	MGI:107726	0.0751372	0.0364143	2.0634	0.0390748	0.337141
ENSMUSG00000002058	ENSMUSG00000002058.14	chr11:78234308-78239990	Unc119	protein_coding	MGI:1328357	-0.121845	0.0524008	-2.32524	0.0200589	0.247972
ENSMUSG00000002274	ENSMUSG00000002274.14	chr17:26012195-26016110	Metrn	protein_coding	MGI:1917333	-0.085149	0.0391157	-2.17685	0.029492	0.299175
ENSMUSG00000002379	ENSMUSG00000002379.8	chr17:57024767-57029141	Ndufa11	protein_coding	MGI:1917125	-0.0859125	0.0339378	-2.53147	0.0113584	0.188278
ENSMUSG00000002475	ENSMUSG00000002475.17	chr18:10642092-10706771	Abhd3	protein_coding	MGI:2147183	-0.117509	0.0397412	-2.95686	0.00310792	0.0902199
ENSMUSG00000002699	ENSMUSG00000002699.14	chr11:33996920-34042295	Lcp2	protein_coding	MGI:1321402	-0.200609	0.101788	-1.97085	0.048741	0.371086
ENSMUSG00000002804	ENSMUSG00000002804.5	chr12:112897911-112905744	Nudt14	protein_coding	MGI:1913424	-0.237973	0.0939627	-2.53263	0.0113209	0.188278
ENSMUSG00000002820	ENSMUSG00000002820.7	chr9:21176589-21189068	Atg4d	protein_coding	MGI:2444308	-0.0744905	0.0376664	-1.97764	0.0479695	0.368674
ENSMUSG00000002963	ENSMUSG00000002963.18	chr7:44506563-44512416	Pnkp	protein_coding	MGI:1891698	-0.135163	0.0512368	-2.63801	0.00833933	0.164394
ENSMUSG00000002980	ENSMUSG00000002980.15	chr7:19490056-19504941	Bcam	protein_coding	MGI:1929940	-0.0897001	0.0449732	-1.99453	0.0460947	0.363751
ENSMUSG00000002985	ENSMUSG00000002985.17	chr7:19430034-19433113	Apoe	protein_coding	MGI:88057	-0.0821936	0.0326214	-2.51962	0.0117481	0.190504
ENSMUSG00000002997	ENSMUSG00000002997.16	chr12:32008475-32111295	Prkar2b	protein_coding	MGI:97760	0.127837	0.0319095	4.00624	6.16939e-05	0.00712892
ENSMUSG00000003119	ENSMUSG00000003119.15	chr11:98093885-98169330	Cdk12	protein_coding	MGI:1098802	0.104984	0.0482343	2.17654	0.0295149	0.299175
ENSMUSG00000003134	ENSMUSG00000003134.11	chr1:39410573-39517836	Tbc1d8	protein_coding	MGI:1927225	0.103236	0.0406915	2.53703	0.0111796	0.186915
ENSMUSG00000003153	ENSMUSG00000003153.11	chr6:122704768-122778599	Slc2a3	protein_coding	MGI:95757	0.0868094	0.0338772	2.56247	0.010393	0.180938
ENSMUSG00000003435	ENSMUSG00000003435.10	chr7:28014316-28038171	Supt5	protein_coding	MGI:1202400	0.0625432	0.0307354	2.03489	0.0418617	0.347866
ENSMUSG00000003528	ENSMUSG00000003528.16	chr16:17743087-17746083	Slc25a1	protein_coding	MGI:1345283	-0.111414	0.0384241	-2.89958	0.00373659	0.102954
ENSMUSG00000003534	ENSMUSG00000003534.18	chr17:35992459-36015513	Ddr1	protein_coding	MGI:99216	-0.120831	0.0392227	-3.08064	0.00206556	0.0708777
ENSMUSG00000003559	ENSMUSG00000003559.9	chr19:46695897-46729538	As3mt	protein_coding	MGI:1929882	-0.1305	0.0504968	-2.58432	0.00975721	0.175611
ENSMUSG00000003604	ENSMUSG00000003604.15	chr2:112323309-112464918	Aven	protein_coding	MGI:1921518	-0.137864	0.069383	-1.987	0.0469229	0.36519
ENSMUSG00000003746	ENSMUSG00000003746.17	chr10:53780881-53952705	Man1a	protein_coding	MGI:104677	0.1645	0.0385271	4.26972	1.95722e-05	0.00306626
ENSMUSG00000003934	ENSMUSG00000003934.6	chr11:69444918-69451031	Efnb3	protein_coding	MGI:109196	-0.0942739	0.0397809	-2.36983	0.0177964	0.236222
ENSMUSG00000003948	ENSMUSG00000003948.18	chr11:90140282-90169415	Mmd	protein_coding	MGI:1914718	0.0816625	0.0291926	2.79737	0.00515201	0.122751
ENSMUSG00000003949	ENSMUSG00000003949.17	chr11:90227362-90281721	Hlf	protein_coding	MGI:96108	0.0813016	0.0331613	2.4517	0.0142183	0.210842
ENSMUSG00000003970	ENSMUSG00000003970.10	chr15:76788278-76790514	Rpl8	protein_coding	MGI:1350927	-0.0611486	0.028953	-2.112	0.0346868	0.320733
ENSMUSG00000004031	ENSMUSG00000004031.14	chr1:158072839-158183896	Brinp2	protein_coding	MGI:2443333	0.0853369	0.0431018	1.97989	0.0477155	0.367871
ENSMUSG00000004035	ENSMUSG00000004035.13	chr3:107833650-107839133	Gstm7	protein_coding	MGI:1915562	-0.127108	0.0535708	-2.3727	0.0176584	0.235535
ENSMUSG00000004264	ENSMUSG00000004264.18	chr6:124689299-124693913	Phb2	protein_coding	MGI:102520	-0.0676382	0.0310559	-2.17795	0.0294099	0.299175
ENSMUSG00000004562	ENSMUSG00000004562.17	chr14:52222176-52243708	Arhgef40	protein_coding	MGI:2685515	-0.0910699	0.0462656	-1.96841	0.0490203	0.371725
ENSMUSG00000004665	ENSMUSG00000004665.11	chr10:79824418-79831896	Cnn2	protein_coding	MGI:105093	-0.18138	0.0801487	-2.26305	0.0236328	0.268688
ENSMUSG00000004892	ENSMUSG00000004892.14	chr3:87894838-87907537	Bcan	protein_coding	MGI:1096385	-0.0883407	0.0333858	-2.64606	0.00814359	0.162906
ENSMUSG00000004894	ENSMUSG00000004894.11	chr3:87929057-87934890	Hapln2	protein_coding	MGI:2137300	-0.242455	0.0510143	-4.75269	2.0073e-06	0.00070554
ENSMUSG00000004902	ENSMUSG00000004902.8	chr6:120750539-120771297	Slc25a18	protein_coding	MGI:1919053	-0.225039	0.0678334	-3.31753	0.000908166	0.0431047
ENSMUSG00000004936	ENSMUSG00000004936.9	chr9:64093052-64160913	Map2k1	protein_coding	MGI:1346866	0.123031	0.0302699	4.06447	4.81423e-05	0.00574395
ENSMUSG00000004961	ENSMUSG00000004961.8	chr7:4542764-4550540	Syt5	protein_coding	MGI:1926368	0.12263	0.0387482	3.16479	0.00155196	0.0604936
ENSMUSG00000005034	ENSMUSG00000005034.16	chr3:146435329-146518745	Prkacb	protein_coding	MGI:97594	0.0753883	0.0307231	2.4538	0.0141357	0.210322
ENSMUSG00000005087	ENSMUSG00000005087.18	chr2:102641486-102732010	Cd44	protein_coding	MGI:88338	-0.228568	0.113766	-2.00912	0.0445248	0.357294
ENSMUSG00000005125	ENSMUSG00000005125.14	chr15:66801167-66841489	Ndrg1	protein_coding	MGI:1341799	-0.214038	0.0430192	-4.9754	6.51128e-07	0.00036817
ENSMUSG00000005148	ENSMUSG00000005148.9	chr14:99536127-99552472	Klf5	protein_coding	MGI:1338056	0.129385	0.0544669	2.37548	0.0175261	0.234702
ENSMUSG00000005338	ENSMUSG00000005338.15	chr1:173160825-173195261	Cadm3	protein_coding	MGI:2137858	0.0701054	0.0295836	2.36974	0.0178006	0.236222
ENSMUSG00000005580	ENSMUSG00000005580.12	chr16:4105393-4238362	Adcy9	protein_coding	MGI:108450	0.169499	0.0620634	2.73106	0.00631304	0.141067
ENSMUSG00000005716	ENSMUSG00000005716.17	chr15:78075314-78090600	Pvalb	protein_coding	MGI:97821	-0.395995	0.196134	-2.019	0.0434869	0.353261
ENSMUSG00000005802	ENSMUSG00000005802.13	chr2:122523153-122544583	Slc30a4	protein_coding	MGI:1345282	0.0825145	0.0405959	2.03258	0.0420945	0.34891
ENSMUSG00000005886	ENSMUSG00000005886.15	chr1:13209329-13444307	Ncoa2	protein_coding	MGI:1276533	0.105062	0.0405459	2.59118	0.00956461	0.174457
ENSMUSG00000005893	ENSMUSG00000005893.15	chr6:92068371-92151275	Nr2c2	protein_coding	MGI:1352466	0.0639402	0.0310564	2.05884	0.0395094	0.337965
ENSMUSG00000006058	ENSMUSG00000006058.11	chr11:95925711-95938256	Snf8	protein_coding	MGI:1343161	-0.0815398	0.0359721	-2.26675	0.0234054	0.26724
ENSMUSG00000006095	ENSMUSG00000006095.13	chr7:29923556-29931697	Tbcb	protein_coding	MGI:1913661	-0.0791485	0.037087	-2.13413	0.0328322	0.313958
ENSMUSG00000006301	ENSMUSG00000006301.18	chr1:74327406-74344781	Tmbim1	protein_coding	MGI:1916910	-0.168266	0.0456965	-3.68226	0.00023118	0.0172787
ENSMUSG00000006390	ENSMUSG00000006390.16	chr4:118285290-118290150	Elovl1	protein_coding	MGI:1858959	-0.166115	0.0488178	-3.40275	0.00066712	0.034843
ENSMUSG00000006403	ENSMUSG00000006403.14	chr1:171077990-171088206	Adamts4	protein_coding	MGI:1339949	-0.144704	0.0393187	-3.6803	0.000232962	0.0173124
ENSMUSG00000006435	ENSMUSG00000006435.17	chr19:47167259-47247880	Neurl1a	protein_coding	MGI:1334263	0.0858309	0.0426428	2.01279	0.0441372	0.355421
ENSMUSG00000006464	ENSMUSG00000006464.10	chr19:4936906-4956656	Bbs1	protein_coding	MGI:1277215	0.100053	0.0391979	2.55252	0.0106948	0.183275
ENSMUSG00000006494	ENSMUSG00000006494.12	chr2:71703568-71734202	Pdk1	protein_coding	MGI:1926119	0.0936157	0.0356366	2.62695	0.00861533	0.166021
ENSMUSG00000006711	ENSMUSG00000006711.16	chr13:25029118-25085253	D130043K22Rik	protein_coding	MGI:3036268	0.115529	0.0460814	2.50705	0.0121743	0.195087
ENSMUSG00000006740	ENSMUSG00000006740.15	chr18:6201002-6242174	Kif5b	protein_coding	MGI:1098268	-0.104613	0.0421432	-2.48232	0.0130531	0.202278
ENSMUSG00000006782	ENSMUSG00000006782.17	chr11:100465730-100482555	Cnp	protein_coding	MGI:88437	-0.196125	0.0414671	-4.72964	2.24913e-06	0.000769736
ENSMUSG00000006930	ENSMUSG00000006930.16	chr11:100238153-100246954	Hap1	protein_coding	MGI:1261831	0.100876	0.0493283	2.045	0.0408549	0.34345
ENSMUSG00000006931	ENSMUSG00000006931.16	chr11:100299282-100305662	P3h4	protein_coding	MGI:1913430	-0.117973	0.0551152	-2.14049	0.0323154	0.311767
ENSMUSG00000006998	ENSMUSG00000006998.17	chr16:20470402-20482164	Psmd2	protein_coding	MGI:1096584	0.0531091	0.0264641	2.00684	0.044767	0.358495
ENSMUSG00000007097	ENSMUSG00000007097.15	chr1:172099276-172125631	Atp1a2	protein_coding	MGI:88106	-0.1008	0.0348544	-2.89203	0.00382767	0.104667
ENSMUSG00000007480	ENSMUSG00000007480.6	chr18:68470667-68475517	Mc5r	protein_coding	MGI:99420	-0.730205	0.236114	-3.09259	0.00198418
ENSMUSG00000007656	ENSMUSG00000007656.14	chr9:74944896-74967595	Arpp19	protein_coding	MGI:1891691	0.0835383	0.0321463	2.59869	0.009358	0.172625
ENSMUSG00000007872	ENSMUSG00000007872.4	chr4:135870808-135873066	Id3	protein_coding	MGI:96398	-0.13426	0.0521465	-2.57467	0.0100335	0.178017
ENSMUSG00000007989	ENSMUSG00000007989.8	chr14:65429898-65499912	Fzd3	protein_coding	MGI:108476	0.109169	0.0456093	2.39356	0.0166856	0.230204
ENSMUSG00000008035	ENSMUSG00000008035.13	chrX:10581252-10585929	Mid1ip1	protein_coding	MGI:1915291	-0.116541	0.0379228	-3.0731	0.00211846	0.0717955
ENSMUSG00000008318	ENSMUSG00000008318.11	chr7:100495054-100512653	Relt	protein_coding	MGI:2443373	-0.19388	0.0636518	-3.04594	0.00231955	0.0755186
ENSMUSG00000008734	ENSMUSG00000008734.10	chr7:118571270-118594434	Gprc5b	protein_coding	MGI:1927596	-0.143337	0.0295564	-4.84961	1.23704e-06	0.000459649
ENSMUSG00000008763	ENSMUSG00000008763.17	chr3:100469524-100592819	Man1a2	protein_coding	MGI:104676	0.0901227	0.0350756	2.56939	0.0101878	0.179429
ENSMUSG00000009356	ENSMUSG00000009356.13	chr11:87697254-87719115	Lpo	protein_coding	MGI:1923363	-0.420369	0.161368	-2.60504	0.00918636
ENSMUSG00000009535	ENSMUSG00000009535.14	chr18:68433426-68457923	Rnmt	protein_coding	MGI:1915147	0.0674117	0.032986	2.04365	0.0409884	0.343906
ENSMUSG00000009551	ENSMUSG00000009551.3	chr2:32622632-32631028	6330409D20Rik	protein_coding	MGI:1917980	-0.295714	0.143732	-2.05739	0.0396483
ENSMUSG00000009575	ENSMUSG00000009575.15	chr15:103099971-103148243	Cbx5	protein_coding	MGI:109372	0.0622385	0.0309153	2.01319	0.0440945	0.355421
ENSMUSG00000009734	ENSMUSG00000009734.19	chr13:18295683-18572271	Pou6f2	protein_coding	MGI:2443631	-0.21663	0.103531	-2.09241	0.0364015	0.326854
ENSMUSG00000010080	ENSMUSG00000010080.16	chr11:94380425-94390800	Epn3	protein_coding	MGI:1919139	-0.577787	0.232682	-2.48316	0.0130221
ENSMUSG00000010154	ENSMUSG00000010154.8	chr8:124059452-124096254	Spire2	protein_coding	MGI:2446256	-0.11244	0.0517112	-2.17439	0.0296758	0.299887
ENSMUSG00000010175	ENSMUSG00000010175.14	chr1:189850232-189902911	Prox1	protein_coding	MGI:97772	-0.157649	0.0735166	-2.1444	0.0320009	0.310713
ENSMUSG00000010529	ENSMUSG00000010529.7	chr12:111451043-111452257	Gm266	protein_coding	MGI:2685112	-0.303711	0.111441	-2.72532	0.00642399	0.142566
ENSMUSG00000010607	ENSMUSG00000010607.9	chr9:22068142-22069654	Pigyl	protein_coding	MGI:1913518	-0.114713	0.0554663	-2.06815	0.0386258	0.337134
ENSMUSG00000010751	ENSMUSG00000010751.16	chr7:143188543-143203398	Tnfrsf22	protein_coding	MGI:1930270	-0.24066	0.120429	-1.99836	0.0456776
ENSMUSG00000010797	ENSMUSG00000010797.7	chr6:17988939-18030584	Wnt2	protein_coding	MGI:98954	0.166255	0.0667075	2.4923	0.0126919	0.19844
ENSMUSG00000011148	ENSMUSG00000011148.15	chr12:112586479-112607794	Adssl1	protein_coding	MGI:87947	-0.183907	0.0464709	-3.95747	7.57493e-05	0.00800247
ENSMUSG00000011884	ENSMUSG00000011884.14	chr5:114807459-114829045	Gltp	protein_coding	MGI:1929253	-0.166397	0.0416404	-3.99605	6.44078e-05	0.00728369
ENSMUSG00000012296	ENSMUSG00000012296.17	chr17:46568777-46593952	Tjap1	protein_coding	MGI:1921344	-0.148461	0.0559725	-2.65239	0.00799235	0.161028
ENSMUSG00000012483	ENSMUSG00000012483.5	chr6:8255936-8259173	Rpa3	protein_coding	MGI:1915490	-0.16179	0.0818943	-1.97559	0.048201	0.369172
ENSMUSG00000012609	ENSMUSG00000012609.20	chr12:85871433-86108667	Ttll5	protein_coding	MGI:2443657	-0.110711	0.0435384	-2.54284	0.0109954	0.185334
ENSMUSG00000013367	ENSMUSG00000013367.6	chr7:43122328-43139499	Iglon5	protein_coding	MGI:2686277	-0.124554	0.0465349	-2.67657	0.00743809	0.154772
ENSMUSG00000013698	ENSMUSG00000013698.13	chr1:172024295-172034371	Pea15a	protein_coding	MGI:104799	-0.062687	0.0292993	-2.13954	0.032392	0.312043
ENSMUSG00000013846	ENSMUSG00000013846.11	chr15:66974724-67048679	St3gal1	protein_coding	MGI:98304	0.162172	0.0643031	2.52199	0.0116693	0.190174
ENSMUSG00000014164	ENSMUSG00000014164.16	chr13:58148042-58261406	Klhl3	protein_coding	MGI:2445185	0.16201	0.0476622	3.39913	0.000675999	0.0351655
ENSMUSG00000014550	ENSMUSG00000014550.15	chr6:92163693-92191906	Rbsn	protein_coding	MGI:1925537	0.0714213	0.0360524	1.98104	0.0475866	0.367715
ENSMUSG00000014813	ENSMUSG00000014813.10	chr14:69266687-69279253	Stc1	protein_coding	MGI:109131	-0.162472	0.0709348	-2.29044	0.021996	0.257977
ENSMUSG00000014846	ENSMUSG00000014846.13	chr8:106194125-106198158	Tppp3	protein_coding	MGI:1915221	-0.160358	0.0517503	-3.09868	0.00194383	0.0683229
ENSMUSG00000014956	ENSMUSG00000014956.16	chr5:32616187-32674777	Ppp1cb	protein_coding	MGI:104871	0.0600736	0.0305005	1.96959	0.048885	0.371086
ENSMUSG00000015053	ENSMUSG00000015053.15	chr6:88170873-88184014	Gata2	protein_coding	MGI:95662	-0.252057	0.0878784	-2.86825	0.00412753	0.109756
ENSMUSG00000015149	ENSMUSG00000015149.15	chr7:28466160-28488086	Sirt2	protein_coding	MGI:1927664	-0.112734	0.0285472	-3.94905	7.84625e-05	0.00816324
ENSMUSG00000015189	ENSMUSG00000015189.13	chr6:4600839-4643355	Casd1	protein_coding	MGI:2384865	0.0674327	0.0329332	2.04756	0.0406032	0.343159
ENSMUSG00000015202	ENSMUSG00000015202.14	chr10:7069063-7162237	Cnksr3	protein_coding	MGI:2674130	-0.171706	0.0729098	-2.35505	0.0185202	0.238046
ENSMUSG00000015312	ENSMUSG00000015312.10	chr10:80765907-80768038	Gadd45b	protein_coding	MGI:107776	0.17296	0.0618925	2.79452	0.00519763	0.123102
ENSMUSG00000015341	ENSMUSG00000015341.18	chr8:23731362-23747090	Golga7	protein_coding	MGI:1931029	-0.106997	0.0354844	-3.01532	0.00256705	0.0804446
ENSMUSG00000015354	ENSMUSG00000015354.9	chr9:95519654-95580149	Pcolce2	protein_coding	MGI:1923727	-0.238356	0.0775672	-3.0729	0.00211991	0.0717955
ENSMUSG00000015714	ENSMUSG00000015714.12	chr3:95222102-95230910	Cers2	protein_coding	MGI:1924143	-0.144203	0.0342576	-4.20936	2.56093e-05	0.0037419
ENSMUSG00000015757	ENSMUSG00000015757.11	chr10:7668655-7698899	Ppil4	protein_coding	MGI:1914668	0.084146	0.037796	2.22632	0.0259928	0.280761
ENSMUSG00000015806	ENSMUSG00000015806.13	chr5:45591363-45607578	Qdpr	protein_coding	MGI:97836	-0.21668	0.0374221	-5.79015	7.03241e-09	1.52428e-05
ENSMUSG00000015839	ENSMUSG00000015839.7	chr2:75505857-75534985	Nfe2l2	protein_coding	MGI:108420	-0.13448	0.0500326	-2.68786	0.00719116	0.151832
ENSMUSG00000015850	ENSMUSG00000015850.12	chr3:95583511-95595228	Adamtsl4	protein_coding	MGI:2389008	-0.28388	0.0578111	-4.91047	9.08603e-07	0.000422014
ENSMUSG00000015970	ENSMUSG00000015970.20	chr14:29730980-29762484	Chdh	protein_coding	MGI:1860776	-0.209758	0.0889344	-2.35857	0.0183453	0.238046
ENSMUSG00000015994	ENSMUSG00000015994.11	chr8:26488750-26505678	Fnta	protein_coding	MGI:104683	-0.0945491	0.0391335	-2.41606	0.0156894	0.223484
ENSMUSG00000016179	ENSMUSG00000016179.12	chr1:193028654-193052606	Camk1g	protein_coding	MGI:2388073	0.124783	0.0598947	2.08337	0.0372174	0.329811
ENSMUSG00000016493	ENSMUSG00000016493.14	chr1:194719134-194774557	Cd46	protein_coding	MGI:1203290	-0.203745	0.0988231	-2.06171	0.039235	0.337141
ENSMUSG00000016520	ENSMUSG00000016520.8	chr5:146953465-147013396	Lnx2	protein_coding	MGI:2155959	0.239591	0.0891393	2.68783	0.00719175	0.151832
ENSMUSG00000016763	ENSMUSG00000016763.16	chr15:83489200-83609222	Scube1	protein_coding	MGI:1890616	0.313889	0.0738921	4.24794	2.15747e-05	0.00320209
ENSMUSG00000016833	ENSMUSG00000016833.15	chr5:100946493-100952337	Mrps18c	protein_coding	MGI:1915985	-0.105504	0.0446626	-2.36226	0.0181641	0.238046
ENSMUSG00000016918	ENSMUSG00000016918.16	chr1:12762501-12931416	Sulf1	protein_coding	MGI:2138563	0.161647	0.0622415	2.59709	0.00940166	0.173185
ENSMUSG00000017009	ENSMUSG00000017009.4	chr2:164266167-164285807	Sdc4	protein_coding	MGI:1349164	-0.11345	0.0469433	-2.41674	0.0156601	0.223312
ENSMUSG00000017314	ENSMUSG00000017314.13	chr11:101947841-101979341	Mpp2	protein_coding	MGI:1858257	0.0838512	0.029598	2.833	0.00461136	0.115233
ENSMUSG00000017344	ENSMUSG00000017344.5	chr11:78389917-78393150	Vtn	protein_coding	MGI:98940	-0.0886156	0.0405839	-2.18352	0.0289978	0.299175
ENSMUSG00000017404	ENSMUSG00000017404.13	chr11:97917536-97921318	Rpl19	protein_coding	MGI:98020	-0.060523	0.0270874	-2.23436	0.0254597	0.277644
ENSMUSG00000017412	ENSMUSG00000017412.16	chr2:52318332-52566843	Cacnb4	protein_coding	MGI:103301	0.0753137	0.0321133	2.34525	0.0190143	0.241015
ENSMUSG00000017453	ENSMUSG00000017453.5	chr11:77771441-77784922	Pipox	protein_coding	MGI:1197006	-0.26013	0.108599	-2.39533	0.0166055	0.230063
ENSMUSG00000017631	ENSMUSG00000017631.20	chr11:76307560-76514384	Abr	protein_coding	MGI:107771	0.0813655	0.0342016	2.379	0.0173599	0.232988
ENSMUSG00000017734	ENSMUSG00000017734.16	chr2:164328026-164335239	Dbndd2	protein_coding	MGI:106562	-0.102818	0.0322999	-3.18323	0.00145643	0.0580372
ENSMUSG00000017760	ENSMUSG00000017760.17	chr2:164674793-164682952	Ctsa	protein_coding	MGI:97748	-0.0657133	0.0293407	-2.23966	0.0251127	0.276394
ENSMUSG00000017778	ENSMUSG00000017778.15	chr13:86192935-86195023	Cox7c	protein_coding	MGI:103226	-0.0744517	0.0319257	-2.33203	0.0196991	0.245625
ENSMUSG00000018166	ENSMUSG00000018166.9	chr10:128403392-128425521	Erbb3	protein_coding	MGI:95411	-0.181864	0.0540464	-3.36496	0.00076556	0.038146
ENSMUSG00000018217	ENSMUSG00000018217.13	chr11:63019808-63050373	Pmp22	protein_coding	MGI:97631	-0.286856	0.039547	-7.25355	4.05999e-13	5.28002e-09
ENSMUSG00000018378	ENSMUSG00000018378.14	chr11:87988884-88084966	Cuedc1	protein_coding	MGI:2144281	-0.119694	0.0428621	-2.79255	0.0052295	0.123206
ENSMUSG00000018470	ENSMUSG00000018470.9	chr11:69217084-69223868	Kcnab3	protein_coding	MGI:1336208	-0.373041	0.160249	-2.32789	0.0199179	0.247113
ENSMUSG00000018500	ENSMUSG00000018500.3	chr11:62139810-62157279	Adora2b	protein_coding	MGI:99403	-0.188565	0.0950955	-1.9829	0.0473786	0.366578
ENSMUSG00000018547	ENSMUSG00000018547.9	chr11:97605983-97635530	Pip4k2b	protein_coding	MGI:1934234	0.0653079	0.0303495	2.15186	0.0314084	0.308007
ENSMUSG00000018822	ENSMUSG00000018822.8	chr19:42186410-42190691	Sfrp5	protein_coding	MGI:1860298	-0.39984	0.15224	-2.62638	0.00862975	0.166021
ENSMUSG00000018909	ENSMUSG00000018909.16	chr7:99184673-99255978	Arrb1	protein_coding	MGI:99473	0.0660968	0.0304836	2.16827	0.0301379	0.301959
ENSMUSG00000019027	ENSMUSG00000019027.9	chr14:30982332-31045853	Dnah1	protein_coding	MGI:107721	0.100431	0.046577	2.15625	0.0310643	0.306286
ENSMUSG00000019055	ENSMUSG00000019055.16	chr4:147994210-148021224	Plod1	protein_coding	MGI:99907	-0.162608	0.0483091	-3.36598	0.000762725	0.038146
ENSMUSG00000019082	ENSMUSG00000019082.19	chr7:141009657-141017805	Slc25a22	protein_coding	MGI:1915517	0.0875306	0.0364875	2.39892	0.0164435	0.229204
ENSMUSG00000019146	ENSMUSG00000019146.3	chr15:77875948-78004228	Cacng2	protein_coding	MGI:1316660	-0.103584	0.0396067	-2.61532	0.00891434	0.168996
ENSMUSG00000019158	ENSMUSG00000019158.10	chr7:16186704-16189419	Tmem160	protein_coding	MGI:1916344	-0.112099	0.0486614	-2.30366	0.0212419	0.253244
ENSMUSG00000019194	ENSMUSG00000019194.16	chr7:30815949-30826428	Scn1b	protein_coding	MGI:98247	-0.126309	0.0347414	-3.6357	0.000277224	0.0184569
ENSMUSG00000019359	ENSMUSG00000019359.15	chrX:99773479-99782501	Gdpd2	protein_coding	MGI:1918834	-0.218119	0.0903795	-2.41337	0.0158057	0.224648
ENSMUSG00000019647	ENSMUSG00000019647.17	chr18:47368665-47501937	Sema6a	protein_coding	MGI:1203727	-0.157468	0.0435209	-3.61821	0.000296642	0.0188187
ENSMUSG00000019699	ENSMUSG00000019699.17	chr1:176847639-177085769	Akt3	protein_coding	MGI:1345147	0.103959	0.0295066	3.52325	0.00042629	0.0248605
ENSMUSG00000019767	ENSMUSG00000019767.13	chr10:4432502-4512231	Ccdc170	protein_coding	MGI:2685067	0.368274	0.184256	1.9987	0.0456407
ENSMUSG00000019772	ENSMUSG00000019772.6	chr10:5589218-5597617	Vip	protein_coding	MGI:98933	0.277996	0.106421	2.61224	0.00899513	0.169588
ENSMUSG00000019777	ENSMUSG00000019777.17	chr10:36850540-36877885	Hdac2	protein_coding	MGI:1097691	0.0821141	0.0346891	2.36714	0.017926	0.237365
ENSMUSG00000019785	ENSMUSG00000019785.15	chr10:33388282-33500765	Clvs2	protein_coding	MGI:2443223	0.085501	0.04281	1.99722	0.0458012	0.362552
ENSMUSG00000019861	ENSMUSG00000019861.16	chr10:52211946-52258220	Gopc	protein_coding	MGI:2149946	0.0771643	0.0368217	2.09562	0.0361157	0.325745
ENSMUSG00000019874	ENSMUSG00000019874.12	chr10:57660977-57664546	Fabp7	protein_coding	MGI:101916	-0.14634	0.0561865	-2.60454	0.00919988	0.171808
ENSMUSG00000019877	ENSMUSG00000019877.11	chr10:57391870-57408626	Serinc1	protein_coding	MGI:1926228	0.0682301	0.0250596	2.72271	0.00647487	0.143272
ENSMUSG00000019894	ENSMUSG00000019894.15	chr10:103203644-103255238	Slc6a15	protein_coding	MGI:2143484	0.11326	0.0423493	2.67442	0.00748588	0.155109
ENSMUSG00000019899	ENSMUSG00000019899.18	chr10:26856032-27495754	Lama2	protein_coding	MGI:99912	-0.16612	0.0758409	-2.19037	0.0284974	0.296725
ENSMUSG00000019906	ENSMUSG00000019906.16	chr10:107107547-107257335	Lin7a	protein_coding	MGI:2135609	0.268606	0.0577767	4.64903	3.33501e-06	0.000942867
ENSMUSG00000019907	ENSMUSG00000019907.11	chr10:107998054-108120336	Ppp1r12a	protein_coding	MGI:1309528	0.0733719	0.0339144	2.16345	0.0305067	0.303224
ENSMUSG00000019927	ENSMUSG00000019927.7	chr10:71090810-71121092	Ube2d1	protein_coding	MGI:2384911	-0.0804289	0.0402075	-2.00035	0.0454628	0.360734
ENSMUSG00000019951	ENSMUSG00000019951.11	chr10:89580853-89655733	Uhrf1bp1l	protein_coding	MGI:2442888	0.0882649	0.0341434	2.58512	0.0097345	0.175611
ENSMUSG00000019966	ENSMUSG00000019966.19	chr10:99851492-99936278	Kitl	protein_coding	MGI:96974	0.0847795	0.0406324	2.0865	0.0369332	0.328983
ENSMUSG00000020015	ENSMUSG00000020015.11	chr10:92996737-93102933	Cdk17	protein_coding	MGI:97517	0.0973478	0.0314584	3.09449	0.00197154	0.0688337
ENSMUSG00000020023	ENSMUSG00000020023.19	chr10:94147811-94426818	Tmcc3	protein_coding	MGI:2442900	-0.135958	0.0388279	-3.50156	0.000462541	0.0264993
ENSMUSG00000020029	ENSMUSG00000020029.7	chr10:95382869-95400008	Nudt4	protein_coding	MGI:1918457	-0.109511	0.0369153	-2.96654	0.0030117	0.0893689
ENSMUSG00000020099	ENSMUSG00000020099.9	chr10:60598372-60667360	Unc5b	protein_coding	MGI:894703	-0.190619	0.0465526	-4.0947	4.22708e-05	0.00528588
ENSMUSG00000020102	ENSMUSG00000020102.16	chr10:125055139-125225334	Slc16a7	protein_coding	MGI:1330284	0.11164	0.0404681	2.75871	0.00580296	0.132167
ENSMUSG00000020140	ENSMUSG00000020140.16	chr10:115286216-115423685	Lgr5	protein_coding	MGI:1341817	-0.276979	0.127795	-2.16737	0.0302064
ENSMUSG00000020169	ENSMUSG00000020169.5	chr10:116822219-116860945	Best3	protein_coding	MGI:3580298	1.40954	0.565922	2.49069	0.0127496
ENSMUSG00000020173	ENSMUSG00000020173.18	chr11:12186608-12414960	Cobl	protein_coding	MGI:105056	0.183281	0.04141	4.42602	9.59859e-06	0.00186313
ENSMUSG00000020183	ENSMUSG00000020183.12	chr10:117465405-117523257	Cpm	protein_coding	MGI:1917824	-0.165241	0.0577211	-2.86274	0.00419998	0.110345
ENSMUSG00000020248	ENSMUSG00000020248.19	chr10:82584535-82599978	Nfyb	protein_coding	MGI:97317	0.0760619	0.0374728	2.02979	0.0423779	0.350365
ENSMUSG00000020256	ENSMUSG00000020256.15	chr10:83323314-83370004	Aldh1l2	protein_coding	MGI:2444680	-0.200548	0.0946282	-2.11933	0.0340629	0.319021
ENSMUSG00000020257	ENSMUSG00000020257.14	chr9:106048127-106068338	Wdr82	protein_coding	MGI:1924555	0.063852	0.0283501	2.25227	0.0243053	0.273434
ENSMUSG00000020263	ENSMUSG00000020263.15	chr10:83435897-83484602	Appl2	protein_coding	MGI:2384914	-0.0865078	0.0336628	-2.56983	0.0101748	0.179429
ENSMUSG00000020275	ENSMUSG00000020275.10	chr11:23686847-23720970	Rel	protein_coding	MGI:97897	0.168632	0.0824738	2.04468	0.0408866	0.343495
ENSMUSG00000020297	ENSMUSG00000020297.11	chr11:31950463-32009202	Nsg2	protein_coding	MGI:1202070	0.0713772	0.0263599	2.70779	0.00677326	0.147796
ENSMUSG00000020305	ENSMUSG00000020305.14	chr11:30835416-31052704	Asb3	protein_coding	MGI:1929749	0.146513	0.0522834	2.80228	0.00507431	0.122433
ENSMUSG00000020317	ENSMUSG00000020317.15	chr10:79412213-79423165	Theg	protein_coding	MGI:1338756	0.520127	0.248203	2.09557	0.0361205
ENSMUSG00000020331	ENSMUSG00000020331.10	chr10:79552468-79571942	Hcn2	protein_coding	MGI:1298210	-0.161311	0.0426979	-3.77796	0.000158119	0.0134401
ENSMUSG00000020340	ENSMUSG00000020340.17	chr11:46084677-46203686	Cyfip2	protein_coding	MGI:1924134	0.0800065	0.0317192	2.52234	0.0116577	0.190174
ENSMUSG00000020354	ENSMUSG00000020354.16	chr11:46787080-47879796	Sgcd	protein_coding	MGI:1346525	0.383315	0.172476	2.22242	0.0262548
ENSMUSG00000020396	ENSMUSG00000020396.9	chr11:4888754-4898064	Nefh	protein_coding	MGI:97309	-0.289453	0.126248	-2.29274	0.021863	0.257152
ENSMUSG00000020411	ENSMUSG00000020411.3	chr11:46038982-46057335	Nipal4	protein_coding	MGI:2444671	-0.254429	0.0702253	-3.62304	0.000291156	0.0187902
ENSMUSG00000020413	ENSMUSG00000020413.12	chr11:8943137-8961191	Hus1	protein_coding	MGI:1277962	-0.134964	0.0514953	-2.6209	0.00876986	0.168218
ENSMUSG00000020423	ENSMUSG00000020423.7	chr1:134002908-134006858	Btg2	protein_coding	MGI:108384	0.301519	0.134329	2.24463	0.0247918	0.275806
ENSMUSG00000020475	ENSMUSG00000020475.4	chr11:5751640-5753733	Pgam2	protein_coding	MGI:1933118	0.263691	0.113999	2.31309	0.0207176	0.250635
ENSMUSG00000020486	ENSMUSG00000020486.20	chr11:87457479-87481365	Septin4	protein_coding	MGI:1270156	-0.220832	0.0386032	-5.72057	1.06166e-08	1.71047e-05
ENSMUSG00000020536	ENSMUSG00000020536.13	chr11:60590549-60605012	Llgl1	protein_coding	MGI:102682	-0.0756266	0.033037	-2.28915	0.0220708	0.257977
ENSMUSG00000020538	ENSMUSG00000020538.16	chr11:60089915-60113407	Srebf1	protein_coding	MGI:107606	-0.0794245	0.038327	-2.07228	0.0382389	0.335106
ENSMUSG00000020546	ENSMUSG00000020546.15	chr11:90367318-90528910	Stxbp4	protein_coding	MGI:1342296	0.147378	0.0475012	3.10262	0.00191813	0.0679655
ENSMUSG00000020564	ENSMUSG00000020564.18	chr12:33197692-33423184	Atxn7l1	protein_coding	MGI:3584458	0.0920199	0.0459526	2.0025	0.0452314	0.359135
ENSMUSG00000020570	ENSMUSG00000020570.16	chr12:33003890-33029859	Sypl	protein_coding	MGI:108081	-0.0963966	0.036251	-2.65914	0.00783402	0.159439
ENSMUSG00000020577	ENSMUSG00000020577.18	chr12:36064556-36092499	Tspan13	protein_coding	MGI:1913359	0.0696406	0.0328431	2.1204	0.0339722	0.319021
ENSMUSG00000020580	ENSMUSG00000020580.11	chr12:16944896-17037824	Rock2	protein_coding	MGI:107926	0.0966538	0.0375199	2.57607	0.00999318	0.178017
ENSMUSG00000020589	ENSMUSG00000020589.18	chr12:12312140-12430966	Cyria	protein_coding	MGI:1261783	0.0609149	0.026286	2.31739	0.0204826	0.250036
ENSMUSG00000020590	ENSMUSG00000020590.17	chr12:35097185-35197478	Snx13	protein_coding	MGI:2661416	0.0620438	0.0301981	2.05456	0.0399215	0.340222
ENSMUSG00000020591	ENSMUSG00000020591.12	chr12:16703383-16710228	Ntsr2	protein_coding	MGI:108018	-0.0871459	0.0416256	-2.09356	0.036299	0.326263
ENSMUSG00000020604	ENSMUSG00000020604.14	chr11:109364200-109464156	Arsg	protein_coding	MGI:1921258	-0.229206	0.0471249	-4.86379	1.1516e-06	0.000457638
ENSMUSG00000020607	ENSMUSG00000020607.8	chr12:14196831-14202055	Lratd1	protein_coding	MGI:2145011	0.125619	0.0356222	3.52641	0.000421232	0.0246762
ENSMUSG00000020614	ENSMUSG00000020614.14	chr11:109560575-109613105	Fam20a	protein_coding	MGI:2388266	-0.150501	0.0608173	-2.47463	0.0133373	0.205268
ENSMUSG00000020620	ENSMUSG00000020620.15	chr11:109823016-109886671	Abca8b	protein_coding	MGI:1351668	0.118693	0.0457248	2.59581	0.00943679	0.173586
ENSMUSG00000020627	ENSMUSG00000020627.11	chr12:5127472-5425682	Klhl29	protein_coding	MGI:2683857	0.0946275	0.0458245	2.065	0.0389233	0.337141
ENSMUSG00000020629	ENSMUSG00000020629.13	chr12:28725230-28732174	Adi1	protein_coding	MGI:2144929	-0.0961942	0.0434649	-2.21315	0.0268875	0.285914
ENSMUSG00000020640	ENSMUSG00000020640.11	chr12:4642638-4763962	Itsn2	protein_coding	MGI:1338049	0.0662473	0.032519	2.03719	0.0416311	0.347728
ENSMUSG00000020656	ENSMUSG00000020656.17	chr12:24622282-24667390	Grhl1	protein_coding	MGI:2182540	0.188916	0.0813813	2.32137	0.020267	0.249123
ENSMUSG00000020696	ENSMUSG00000020696.19	chr11:82693275-82762036	Rffl	protein_coding	MGI:1914588	-0.149731	0.0575909	-2.59991	0.00932474	0.172423
ENSMUSG00000020717	ENSMUSG00000020717.20	chr11:106545043-106641454	Pecam1	protein_coding	MGI:97537	-0.120926	0.0407839	-2.96506	0.00302628	0.0893689
ENSMUSG00000020732	ENSMUSG00000020732.14	chr11:114982257-115053062	Rab37	protein_coding	MGI:1929945	-0.499579	0.204842	-2.43885	0.0147339	0.215539
ENSMUSG00000020733	ENSMUSG00000020733.4	chr11:115054167-115072007	Slc9a3r1	protein_coding	MGI:1349482	-0.0886912	0.0397973	-2.22858	0.0258421	0.280064
ENSMUSG00000020743	ENSMUSG00000020743.16	chr11:115498744-115503795	Mif4gd	protein_coding	MGI:1916924	-0.183375	0.0555536	-3.30087	0.00096385	0.0452063
ENSMUSG00000020744	ENSMUSG00000020744.14	chr11:115505004-115519121	Slc25a19	protein_coding	MGI:1914533	-0.0808516	0.0367744	-2.19858	0.0279075	0.293371
ENSMUSG00000020747	ENSMUSG00000020747.19	chr11:115656259-115690192	Tmem94	protein_coding	MGI:1919197	0.0760689	0.0384834	1.97667	0.0480793	0.368674
ENSMUSG00000020774	ENSMUSG00000020774.10	chr11:73195818-73220422	Aspa	protein_coding	MGI:87914	-0.182152	0.0498201	-3.6562	0.000255978	0.0181015
ENSMUSG00000020777	ENSMUSG00000020777.17	chr11:116062714-116089871	Acox1	protein_coding	MGI:1330812	0.0602995	0.0271461	2.22129	0.0263312	0.281841
ENSMUSG00000020810	ENSMUSG00000020810.6	chr11:116536421-116545139	Cygb	protein_coding	MGI:2149481	-0.113357	0.0474437	-2.3893	0.0168806	0.230389
ENSMUSG00000020811	ENSMUSG00000020811.17	chr11:71640746-71680473	Wscd1	protein_coding	MGI:2448493	-0.13341	0.0334632	-3.98676	6.69814e-05	0.00738215
ENSMUSG00000020817	ENSMUSG00000020817.17	chr11:70735604-70833931	Rabep1	protein_coding	MGI:1860236	0.064212	0.0294672	2.1791	0.0293241	0.299175
ENSMUSG00000020821	ENSMUSG00000020821.18	chr11:70591374-70622790	Kif1c	protein_coding	MGI:1098260	-0.0990548	0.0317958	-3.11534	0.00183733	0.0665995
ENSMUSG00000020836	ENSMUSG00000020836.16	chr11:77353237-77361310	Coro6	protein_coding	MGI:2183448	-0.232918	0.0781594	-2.98004	0.00288215	0.0873714
ENSMUSG00000020864	ENSMUSG00000020864.14	chr11:94218827-94232667	Ankrd40	protein_coding	MGI:1918702	-0.0665065	0.0290514	-2.28927	0.0220636	0.257977
ENSMUSG00000020921	ENSMUSG00000020921.7	chr11:102043372-102047230	Tmem101	protein_coding	MGI:1923797	-0.093222	0.0462717	-2.01467	0.0439397	0.354969
ENSMUSG00000020929	ENSMUSG00000020929.15	chr11:102729299-102771811	Eftud2	protein_coding	MGI:1336880	0.0878694	0.0339063	2.59154	0.00955483	0.174457
ENSMUSG00000020986	ENSMUSG00000020986.14	chr12:59005169-59058803	Sec23a	protein_coding	MGI:1349635	0.0680238	0.0320507	2.12238	0.0338056	0.318812
ENSMUSG00000021010	ENSMUSG00000021010.10	chr12:53294940-54118958	Npas3	protein_coding	MGI:1351610	-0.119652	0.054847	-2.18156	0.0291422	0.299175
ENSMUSG00000021018	ENSMUSG00000021018.9	chr16:20536415-20541017	Polr2h	protein_coding	MGI:2384309	-0.127622	0.0630798	-2.02318	0.0430546	0.353261
ENSMUSG00000021057	ENSMUSG00000021057.16	chr12:76371665-76380927	Akap5	protein_coding	MGI:2685104	0.166071	0.0454794	3.65158	0.000260634	0.0181355
ENSMUSG00000021061	ENSMUSG00000021061.16	chr12:76627262-76757321	Sptb	protein_coding	MGI:98387	0.102596	0.0464029	2.21098	0.027037	0.287268
ENSMUSG00000021062	ENSMUSG00000021062.16	chr12:76844734-76869682	Rab15	protein_coding	MGI:1916865	0.0567823	0.0277938	2.04299	0.0410539	0.344233
ENSMUSG00000021066	ENSMUSG00000021066.10	chr12:69939388-70013191	Atl1	protein_coding	MGI:1921241	0.0775617	0.0302411	2.56478	0.0103241	0.180221
ENSMUSG00000021071	ENSMUSG00000021071.18	chr12:70291307-70394388	Trim9	protein_coding	MGI:2137354	0.0741595	0.0371559	1.9959	0.0459445	0.363006
ENSMUSG00000021087	ENSMUSG00000021087.19	chr12:72258526-72455828	Rtn1	protein_coding	MGI:1933947	0.0764235	0.0257936	2.96288	0.00304771	0.0894706
ENSMUSG00000021140	ENSMUSG00000021140.10	chr12:81906797-82047698	Pcnx	protein_coding	MGI:1891924	0.0944309	0.0427696	2.20789	0.0272516	0.28884
ENSMUSG00000021190	ENSMUSG00000021190.15	chr12:102360343-102406072	Lgmn	protein_coding	MGI:1330838	-0.0770979	0.0304423	-2.53259	0.0113224	0.188278
ENSMUSG00000021194	ENSMUSG00000021194.7	chr12:102521228-102531287	Chga	protein_coding	MGI:88394	-0.0761404	0.0316852	-2.40303	0.0162601	0.227869
ENSMUSG00000021214	ENSMUSG00000021214.15	chr13:4182614-4200653	Akr1c18	protein_coding	MGI:2145420	-0.888854	0.448159	-1.98334	0.0473292
ENSMUSG00000021223	ENSMUSG00000021223.14	chr12:83810408-83839156	Papln	protein_coding	MGI:2386139	0.197775	0.0849687	2.32762	0.0199325	0.247113
ENSMUSG00000021240	ENSMUSG00000021240.7	chr12:84648238-84664187	Abcd4	protein_coding	MGI:1349217	-0.105844	0.0521696	-2.02885	0.0424736	0.350933
ENSMUSG00000021242	ENSMUSG00000021242.10	chr12:84801336-84819926	Npc2	protein_coding	MGI:1915213	-0.105603	0.0340452	-3.10184	0.00192321	0.0679655
ENSMUSG00000021245	ENSMUSG00000021245.16	chr12:85281294-85317373	Mlh3	protein_coding	MGI:1353455	0.0877943	0.0427654	2.05293	0.0400796	0.341123
ENSMUSG00000021250	ENSMUSG00000021250.14	chr12:85520664-85524047	Fos	protein_coding	MGI:95574	0.432727	0.197415	2.19197	0.0283817	0.296469
ENSMUSG00000021253	ENSMUSG00000021253.8	chr12:86103519-86125815	Tgfb3	protein_coding	MGI:98727	-0.141468	0.0524248	-2.69849	0.00696548	0.149236
ENSMUSG00000021254	ENSMUSG00000021254.10	chr12:86288632-86338558	Gpatch2l	protein_coding	MGI:1917623	0.0700513	0.0356346	1.96582	0.0493191	0.372873
ENSMUSG00000021303	ENSMUSG00000021303.15	chr13:13958644-14002481	Gng4	protein_coding	MGI:102703	0.117854	0.0543526	2.16833	0.0301339	0.301959
ENSMUSG00000021340	ENSMUSG00000021340.14	chr13:25127135-25176484	Gpld1	protein_coding	MGI:106604	-0.140194	0.0409814	-3.42091	0.000624115	0.0331291
ENSMUSG00000021360	ENSMUSG00000021360.17	chr13:41013230-41114368	Gcnt2	protein_coding	MGI:1100870	0.0961946	0.039521	2.43401	0.0149326	0.216739
ENSMUSG00000021373	ENSMUSG00000021373.17	chr13:46655324-46803757	Cap2	protein_coding	MGI:1914502	0.103209	0.0262564	3.93081	8.46596e-05	0.0083409
ENSMUSG00000021395	ENSMUSG00000021395.12	chr13:51254916-51306582	Spin1	protein_coding	MGI:109242	0.0751301	0.0264243	2.84322	0.00446609	0.11278
ENSMUSG00000021448	ENSMUSG00000021448.9	chr13:51585077-51723523	Shc3	protein_coding	MGI:106179	0.184135	0.0653527	2.81756	0.004839	0.118432
ENSMUSG00000021451	ENSMUSG00000021451.17	chr13:51839565-51947783	Sema4d	protein_coding	MGI:109244	-0.117886	0.0381437	-3.09058	0.00199763	0.0690936
ENSMUSG00000021477	ENSMUSG00000021477.10	chr13:64507151-64518704	Ctsl	protein_coding	MGI:88564	-0.0670131	0.0324723	-2.0637	0.039046	0.337141
ENSMUSG00000021534	ENSMUSG00000021534.9	chr13:68745540-68762350	1700001L19Rik	protein_coding	MGI:1916565	0.191957	0.0964592	1.99003	0.0465879	0.364113
ENSMUSG00000021541	ENSMUSG00000021541.15	chr13:56920926-57043806	Trpc7	protein_coding	MGI:1349470	0.158795	0.0803093	1.97729	0.0480086	0.368674
ENSMUSG00000021555	ENSMUSG00000021555.16	chr13:59733073-59783736	Naa35	protein_coding	MGI:1925939	0.0768464	0.0367649	2.09021	0.0365989	0.328254
ENSMUSG00000021557	ENSMUSG00000021557.16	chr13:59593556-59733041	Agtpbp1	protein_coding	MGI:2159437	0.0840864	0.0288304	2.91658	0.00353887	0.0989064
ENSMUSG00000021559	ENSMUSG00000021559.15	chr13:60749761-60911005	Dapk1	protein_coding	MGI:1916885	0.122194	0.0369631	3.30583	0.000946952	0.0447822
ENSMUSG00000021587	ENSMUSG00000021587.6	chr13:75237945-75282980	Pcsk1	protein_coding	MGI:97511	0.13278	0.052432	2.53243	0.0113276	0.188278
ENSMUSG00000021591	ENSMUSG00000021591.9	chr13:75987987-75998273	Glrx	protein_coding	MGI:2135625	-0.15342	0.0677101	-2.26583	0.0234615	0.267647
ENSMUSG00000021596	ENSMUSG00000021596.17	chr13:76532654-77179929	Mctp1	protein_coding	MGI:1926021	0.10698	0.0461795	2.31661	0.0205248	0.250036
ENSMUSG00000021620	ENSMUSG00000021620.5	chr13:91889631-91934267	Acot12	protein_coding	MGI:1921406	0.709218	0.356282	1.99061	0.0465239
ENSMUSG00000021647	ENSMUSG00000021647.8	chr13:100034997-100037599	Cartpt	protein_coding	MGI:1351330	0.374418	0.162904	2.2984	0.0215389	0.255393
ENSMUSG00000021660	ENSMUSG00000021660.15	chr13:98446404-98453514	Btf3	protein_coding	MGI:1202875	-0.0679918	0.0336529	-2.02038	0.0433437	0.353261
ENSMUSG00000021676	ENSMUSG00000021676.11	chr13:95763682-96028991	Iqgap2	protein_coding	MGI:2449975	0.166189	0.0557439	2.98129	0.00287035	0.0873714
ENSMUSG00000021684	ENSMUSG00000021684.18	chr13:95160962-95386844	Pde8b	protein_coding	MGI:2443999	0.0714502	0.0334743	2.13448	0.0328036	0.313916
ENSMUSG00000021687	ENSMUSG00000021687.15	chr13:94337818-94422365	Scamp1	protein_coding	MGI:1349480	0.0741621	0.0310063	2.39184	0.0167642	0.230389
ENSMUSG00000021696	ENSMUSG00000021696.10	chr13:108350938-108422217	Elovl7	protein_coding	MGI:1921809	-0.188503	0.049711	-3.79198	0.000149454	0.0129576
ENSMUSG00000021699	ENSMUSG00000021699.18	chr13:108586482-110089995	Pde4d	protein_coding	MGI:99555	0.101879	0.0496512	2.05189	0.0401804	0.341534
ENSMUSG00000021700	ENSMUSG00000021700.11	chr13:110190721-110417530	Rab3c	protein_coding	MGI:1914545	0.088837	0.042566	2.08704	0.0368841	0.328837
ENSMUSG00000021701	ENSMUSG00000021701.9	chr13:110531580-110537378	Plk2	protein_coding	MGI:1099790	0.122718	0.034391	3.56831	0.000359289	0.0216881
ENSMUSG00000021703	ENSMUSG00000021703.10	chr13:92747599-92848455	Serinc5	protein_coding	MGI:2444223	-0.0889985	0.0340804	-2.61143	0.00901645	0.169588
ENSMUSG00000021721	ENSMUSG00000021721.6	chr13:105580147-105584630	Htr1a	protein_coding	MGI:96273	0.246123	0.0784094	3.13895	0.00169554	0.0637296
ENSMUSG00000021733	ENSMUSG00000021733.12	chr14:7669823-7767484	Slc4a7	protein_coding	MGI:2443878	0.117038	0.0470271	2.48874	0.0128196	0.199902
ENSMUSG00000021759	ENSMUSG00000021759.15	chr13:112937326-113004428	Plpp1	protein_coding	MGI:108412	-0.103615	0.048847	-2.12121	0.0339042	0.319021
ENSMUSG00000021779	ENSMUSG00000021779.20	chr14:4431611-4809435	Thrb	protein_coding	MGI:98743	0.207957	0.0397827	5.22733	1.71976e-07	0.000115834
ENSMUSG00000021814	ENSMUSG00000021814.18	chr14:20505328-20530201	Anxa7	protein_coding	MGI:88031	0.0654483	0.0333268	1.96383	0.0495494	0.37421
ENSMUSG00000021816	ENSMUSG00000021816.12	chr14:20549432-20596641	Ppp3cb	protein_coding	MGI:107163	0.0561563	0.0270561	2.07555	0.0379358	0.333693
ENSMUSG00000021820	ENSMUSG00000021820.19	chr14:20784943-20844156	Camk2g	protein_coding	MGI:88259	-0.0922817	0.0412057	-2.23954	0.0251209	0.276394
ENSMUSG00000021838	ENSMUSG00000021838.18	chr14:47120311-47343272	Samd4	protein_coding	MGI:1921730	-0.098226	0.0499173	-1.96777	0.0490941	0.372068
ENSMUSG00000021929	ENSMUSG00000021929.10	chr14:61602660-61677323	Kpna3	protein_coding	MGI:1100863	0.0837994	0.0320929	2.61115	0.00902381	0.169588
ENSMUSG00000021936	ENSMUSG00000021936.15	chr14:33099855-33169115	Mapk8	protein_coding	MGI:1346861	0.0935894	0.0358035	2.61397	0.00894958	0.169272
ENSMUSG00000021943	ENSMUSG00000021943.8	chr14:33645544-33659940	Gdf10	protein_coding	MGI:95684	-0.120177	0.0591711	-2.03101	0.0422537	0.349561
ENSMUSG00000021987	ENSMUSG00000021987.10	chr14:60502677-60539819	Mtmr6	protein_coding	MGI:2145637	0.0843908	0.0277893	3.03681	0.00239094	0.0773488
ENSMUSG00000021990	ENSMUSG00000021990.17	chr14:60871450-61002005	Spata13	protein_coding	MGI:104838	0.138902	0.0514463	2.69995	0.00693507	0.149099
ENSMUSG00000022008	ENSMUSG00000022008.5	chr14:76323676-76348200	Gpalpp1	protein_coding	MGI:1914717	0.0923468	0.0372132	2.48156	0.0130808	0.202278
ENSMUSG00000022012	ENSMUSG00000022012.10	chr14:77394203-77959200	Enox1	protein_coding	MGI:2444896	0.169106	0.0429811	3.93442	8.33981e-05	0.0083409
ENSMUSG00000022016	ENSMUSG00000022016.18	chr14:78729686-78774248	Akap11	protein_coding	MGI:2684060	0.10314	0.0460305	2.24068	0.0250467	0.276279
ENSMUSG00000022024	ENSMUSG00000022024.11	chr14:79825131-79872636	Sugt1	protein_coding	MGI:1915205	0.0679778	0.0313442	2.16875	0.0301015	0.301959
ENSMUSG00000022037	ENSMUSG00000022037.16	chr14:66205932-66218996	Clu	protein_coding	MGI:88423	-0.0708297	0.0298211	-2.37515	0.0175417	0.234702
ENSMUSG00000022044	ENSMUSG00000022044.15	chr14:66581745-66599129	Stmn4	protein_coding	MGI:1931224	-0.0952794	0.0366056	-2.60286	0.0092449	0.171946
ENSMUSG00000022054	ENSMUSG00000022054.12	chr14:68320039-68362295	Nefm	protein_coding	MGI:97314	-0.222358	0.111459	-1.99498	0.0460454	0.363582
ENSMUSG00000022055	ENSMUSG00000022055.8	chr14:68321312-68326544	Nefl	protein_coding	MGI:97313	-0.0923325	0.0457895	-2.01646	0.0437521	0.354421
ENSMUSG00000022090	ENSMUSG00000022090.11	chr14:70401667-70415130	Pdlim2	protein_coding	MGI:2384850	-0.18983	0.0581396	-3.26507	0.00109438	0.0481593
ENSMUSG00000022091	ENSMUSG00000022091.7	chr14:70417917-70449438	Sorbs3	protein_coding	MGI:700013	-0.158782	0.0450086	-3.52782	0.000418997	0.0246563
ENSMUSG00000022096	ENSMUSG00000022096.15	chr14:70789652-70810988	Hr	protein_coding	MGI:96223	-0.145037	0.0488433	-2.96944	0.00298346	0.0892
ENSMUSG00000022100	ENSMUSG00000022100.15	chr14:70891686-71004068	Xpo7	protein_coding	MGI:1929705	0.0725643	0.0342291	2.11996	0.0340095	0.319021
ENSMUSG00000022122	ENSMUSG00000022122.16	chr14:104052061-104081838	Ednrb	protein_coding	MGI:102720	-0.135095	0.0339371	-3.98074	6.87014e-05	0.00750809
ENSMUSG00000022201	ENSMUSG00000022201.17	chr15:12117917-12185769	Zfr	protein_coding	MGI:1341890	0.0612785	0.0258313	2.37226	0.0176797	0.235579
ENSMUSG00000022212	ENSMUSG00000022212.16	chr14:55747902-55754888	Cpne6	protein_coding	MGI:1334445	0.146358	0.0589586	2.48239	0.0130504	0.202278
ENSMUSG00000022257	ENSMUSG00000022257.5	chr15:34238174-34284448	Laptm4b	protein_coding	MGI:1890494	-0.0958804	0.0423897	-2.26188	0.0237049	0.268954
ENSMUSG00000022292	ENSMUSG00000022292.17	chr15:37924196-37961562	Rrm2b	protein_coding	MGI:2155865	0.0937786	0.0367936	2.54878	0.0108102	0.184739
ENSMUSG00000022295	ENSMUSG00000022295.9	chr15:38662177-38692690	Atp6v1c1	protein_coding	MGI:1913585	0.0540219	0.026936	2.00557	0.0449025	0.358628
ENSMUSG00000022305	ENSMUSG00000022305.14	chr15:39733985-39807390	Lrp12	protein_coding	MGI:2443132	0.0802581	0.038223	2.09973	0.0357525	0.324984
ENSMUSG00000022324	ENSMUSG00000022324.16	chr15:34306823-34436419	Matn2	protein_coding	MGI:109613	0.30961	0.0785984	3.93914	8.17745e-05	0.0083409
ENSMUSG00000022342	ENSMUSG00000022342.7	chr15:44969680-44978316	Kcnv1	protein_coding	MGI:1914748	0.180852	0.0382898	4.72323	2.32131e-06	0.000774067
ENSMUSG00000022372	ENSMUSG00000022372.15	chr15:66652668-66703678	Sla	protein_coding	MGI:104295	0.23316	0.0995411	2.34234	0.0191631	0.241723
ENSMUSG00000022388	ENSMUSG00000022388.15	chr15:88774836-88838621	Ttll8	protein_coding	MGI:1922902	0.593862	0.211175	2.81218	0.00492074
ENSMUSG00000022421	ENSMUSG00000022421.21	chr15:79670552-79688967	Nptxr	protein_coding	MGI:1920590	0.136527	0.0521879	2.61606	0.00889503	0.168996
ENSMUSG00000022425	ENSMUSG00000022425.17	chr15:54702297-54816288	Enpp2	protein_coding	MGI:1321390	-0.182752	0.0375663	-4.86478	1.14583e-06	0.000457638
ENSMUSG00000022452	ENSMUSG00000022452.17	chr15:82223160-82233292	Smdt1	protein_coding	MGI:1916279	-0.0842911	0.0389076	-2.16645	0.0302771	0.302598
ENSMUSG00000022454	ENSMUSG00000022454.18	chr15:94973111-95426440	Nell2	protein_coding	MGI:1858510	0.119147	0.032799	3.63264	0.000280536	0.0185196
ENSMUSG00000022472	ENSMUSG00000022472.17	chr15:81876724-81918063	Desi1	protein_coding	MGI:106313	-0.138391	0.0301412	-4.59144	4.40206e-06	0.0011005
ENSMUSG00000022494	ENSMUSG00000022494.16	chr16:11801977-12088766	Shisa9	protein_coding	MGI:1919805	0.0661681	0.0332398	1.99063	0.0465215	0.364113
ENSMUSG00000022500	ENSMUSG00000022500.16	chr16:10777139-10884021	Litaf	protein_coding	MGI:1929512	-0.215887	0.0460154	-4.69162	2.71046e-06	0.000853923
ENSMUSG00000022507	ENSMUSG00000022507.7	chr16:8647964-8676786	1810013L24Rik	protein_coding	MGI:1916303	0.0920282	0.0389973	2.35986	0.0182818	0.238046
ENSMUSG00000022514	ENSMUSG00000022514.15	chr16:26400454-26548867	Il1rap	protein_coding	MGI:104975	-0.110119	0.043092	-2.55545	0.0106052	0.182194
ENSMUSG00000022528	ENSMUSG00000022528.9	chr16:29883202-29886614	Hes1	protein_coding	MGI:104853	-0.269408	0.117944	-2.28422	0.0223589	0.259083
ENSMUSG00000022546	ENSMUSG00000022546.6	chr15:76579916-76583886	Gpt	protein_coding	MGI:95802	-0.13062	0.0627876	-2.08035	0.0374931	0.331474
ENSMUSG00000022548	ENSMUSG00000022548.15	chr16:31115010-31133626	Apod	protein_coding	MGI:88056	-0.237064	0.0397036	-5.97084	2.3604e-09	1.38377e-05
ENSMUSG00000022607	ENSMUSG00000022607.19	chr15:73076951-73295129	Ptk2	protein_coding	MGI:95481	0.0733112	0.0310315	2.36248	0.0181533	0.238046
ENSMUSG00000022678	ENSMUSG00000022678.17	chr16:13981139-14010792	Nde1	protein_coding	MGI:1914453	-0.0975226	0.0409542	-2.38126	0.0172535	0.232823
ENSMUSG00000022696	ENSMUSG00000022696.18	chr16:44060543-44153559	Sidt1	protein_coding	MGI:2443155	0.148447	0.0716752	2.0711	0.038349	0.335618
ENSMUSG00000022747	ENSMUSG00000022747.18	chr16:58288488-58344606	St3gal6	protein_coding	MGI:1888707	-0.12296	0.0518656	-2.37074	0.0177524	0.236063
ENSMUSG00000022756	ENSMUSG00000022756.18	chr16:17389882-17401078	Slc7a4	protein_coding	MGI:2146512	0.104625	0.03776	2.77079	0.00559199	0.128715
ENSMUSG00000022762	ENSMUSG00000022762.19	chr16:80997585-81423716	Ncam2	protein_coding	MGI:97282	0.0912828	0.044653	2.04427	0.0409268	0.343611
ENSMUSG00000022766	ENSMUSG00000022766.15	chr16:17149235-17161439	Serpind1	protein_coding	MGI:96051	-0.329483	0.0992281	-3.32046	0.000898699	0.0428116
ENSMUSG00000022769	ENSMUSG00000022769.10	chr16:16948002-16950247	Sdf2l1	protein_coding	MGI:2149842	-0.166576	0.0726573	-2.29263	0.0218693	0.257152
ENSMUSG00000022773	ENSMUSG00000022773.20	chr16:16887560-16904909	Ypel1	protein_coding	MGI:1913303	0.221894	0.0672166	3.30118	0.000962806	0.0452063
ENSMUSG00000022783	ENSMUSG00000022783.12	chr16:16570880-16647320	Spag6l	protein_coding	MGI:1354388	0.162568	0.0781779	2.07946	0.0375754	0.331914
ENSMUSG00000022811	ENSMUSG00000022811.18	chr16:33201206-33324733	Zfp148	protein_coding	MGI:1332234	0.0652985	0.0328115	1.99011	0.0465786	0.364113
ENSMUSG00000022829	ENSMUSG00000022829.15	chr16:36935304-37205324	Stxbp5l	protein_coding	MGI:2443815	0.278224	0.0650799	4.27512	1.91035e-05	0.00302977
ENSMUSG00000022861	ENSMUSG00000022861.18	chr16:22287211-22475971	Dgkg	protein_coding	MGI:105060	0.275291	0.11568	2.37975	0.0173244	0.232823
ENSMUSG00000022864	ENSMUSG00000022864.15	chr16:78337226-78373596	D16Ertd472e	protein_coding	MGI:1196400	-0.152248	0.0637325	-2.38887	0.0169005	0.230389
ENSMUSG00000022865	ENSMUSG00000022865.15	chr16:78098377-78156662	Cxadr	protein_coding	MGI:1201679	0.154237	0.0600083	2.57027	0.010162	0.179429
ENSMUSG00000022887	ENSMUSG00000022887.10	chr16:23268167-23339565	Masp1	protein_coding	MGI:88492	-0.138868	0.063965	-2.171	0.0299314	0.301689
ENSMUSG00000022895	ENSMUSG00000022895.17	chr16:95502942-95522095	Ets2	protein_coding	MGI:95456	0.1083	0.0433248	2.49973	0.0124288	0.196264
ENSMUSG00000022905	ENSMUSG00000022905.13	chr16:35799120-35857501	Kpna1	protein_coding	MGI:103560	0.0897583	0.0289807	3.09718	0.00195373	0.0684858
ENSMUSG00000023010	ENSMUSG00000023010.16	chr15:99290763-99307930	Tmbim6	protein_coding	MGI:99682	-0.0654936	0.0263989	-2.48092	0.0131042	0.202399
ENSMUSG00000023034	ENSMUSG00000023034.8	chr15:101152150-101172676	Nr4a1	protein_coding	MGI:1352454	0.257727	0.104337	2.47013	0.0135063	0.20663
ENSMUSG00000023048	ENSMUSG00000023048.14	chr15:102367463-102371241	Prr13	protein_coding	MGI:1913401	-0.119808	0.0464491	-2.57933	0.00989924	0.177277
ENSMUSG00000023068	ENSMUSG00000023068.17	chr10:52293643-52316279	Nus1	protein_coding	MGI:1196365	0.0803609	0.0303006	2.65212	0.00799879	0.161028
ENSMUSG00000023232	ENSMUSG00000023232.18	chr4:130147288-130172998	Serinc2	protein_coding	MGI:1919132	-0.330373	0.134196	-2.46188	0.0138211
ENSMUSG00000023284	ENSMUSG00000023284.16	chr5:110257958-110277660	Zfp605	protein_coding	MGI:2444933	0.161134	0.0559781	2.87851	0.00399558	0.107361
ENSMUSG00000023439	ENSMUSG00000023439.12	chr6:124811203-124817238	Gnb3	protein_coding	MGI:95785	-0.965165	0.411285	-2.34671	0.0189401
ENSMUSG00000023495	ENSMUSG00000023495.14	chr9:106330490-106341211	Pcbp4	protein_coding	MGI:1890471	-0.0885203	0.0318458	-2.77966	0.00544163	0.125839
ENSMUSG00000023800	ENSMUSG00000023800.16	chr17:3376848-3581619	Tiam2	protein_coding	MGI:1344338	0.109731	0.0299097	3.66876	0.00024373	0.0175398
ENSMUSG00000023827	ENSMUSG00000023827.9	chr17:12337591-12438532	Agpat4	protein_coding	MGI:1915512	-0.0925406	0.0403394	-2.29405	0.0217876	0.257121
ENSMUSG00000023886	ENSMUSG00000023886.11	chr17:14499768-14625052	Smoc2	protein_coding	MGI:1929881	0.444624	0.192329	2.31179	0.0207895
ENSMUSG00000023909	ENSMUSG00000023909.5	chr17:23955160-23959841	Paqr4	protein_coding	MGI:1923748	-0.0852473	0.0333028	-2.55976	0.0104744	0.181868
ENSMUSG00000023913	ENSMUSG00000023913.18	chr17:43878989-43923092	Pla2g7	protein_coding	MGI:1351327	-0.129092	0.0385933	-3.34493	0.000823034	0.0400882
ENSMUSG00000023951	ENSMUSG00000023951.19	chr17:46327919-46343295	Vegfa	protein_coding	MGI:103178	-0.153847	0.0560035	-2.74709	0.00601264	0.135519
ENSMUSG00000023963	ENSMUSG00000023963.11	chr17:43978316-44062322	Cyp39a1	protein_coding	MGI:1927096	-0.229409	0.109997	-2.08559	0.037016	0.32927
ENSMUSG00000023990	ENSMUSG00000023990.19	chr17:48047955-48103344	Tfeb	protein_coding	MGI:103270	-0.221994	0.0596523	-3.72146	0.000198073	0.015707
ENSMUSG00000024053	ENSMUSG00000024053.12	chr17:71559167-71618973	Emilin2	protein_coding	MGI:2389136	-0.206236	0.0839442	-2.45683	0.0140171	0.209383
ENSMUSG00000024063	ENSMUSG00000024063.14	chr17:73225300-73248942	Lbh	protein_coding	MGI:1925139	-0.131216	0.038818	-3.38029	0.000724084	0.0368392
ENSMUSG00000024065	ENSMUSG00000024065.9	chr17:74111129-74139089	Ehd3	protein_coding	MGI:1928900	0.0698536	0.0325882	2.14353	0.0320708	0.310953
ENSMUSG00000024070	ENSMUSG00000024070.16	chr17:79256834-79328245	Prkd3	protein_coding	MGI:1922542	-0.0971493	0.0444346	-2.18635	0.0287903	0.298186
ENSMUSG00000024083	ENSMUSG00000024083.17	chr17:64588000-64638911	Pja2	protein_coding	MGI:2159342	0.0871632	0.0309369	2.81745	0.00484067	0.118432
ENSMUSG00000024122	ENSMUSG00000024122.17	chr17:24292654-24369898	Pdpk1	protein_coding	MGI:1338068	0.0960855	0.0339305	2.83183	0.0046282	0.115306
ENSMUSG00000024132	ENSMUSG00000024132.7	chr17:24645615-24658322	Eci1	protein_coding	MGI:94871	-0.107357	0.0518734	-2.06959	0.038491	0.336329
ENSMUSG00000024172	ENSMUSG00000024172.11	chr17:55752383-55821582	St6gal2	protein_coding	MGI:2445190	0.171425	0.0371384	4.61585	3.91497e-06	0.00103906
ENSMUSG00000024187	ENSMUSG00000024187.16	chr17:26430796-26463216	Fam234a	protein_coding	MGI:2146854	-0.149547	0.055688	-2.68544	0.00724341	0.152246
ENSMUSG00000024190	ENSMUSG00000024190.8	chr17:26724564-26781102	Dusp1	protein_coding	MGI:105120	0.19233	0.0648303	2.96667	0.00301042	0.0893689
ENSMUSG00000024194	ENSMUSG00000024194.17	chr17:27152793-27158543	Cuta	protein_coding	MGI:1914925	-0.109417	0.0427896	-2.5571	0.010555	0.182034
ENSMUSG00000024197	ENSMUSG00000024197.11	chr17:56584476-56599873	Plin3	protein_coding	MGI:1914155	-0.206524	0.0632259	-3.26644	0.00108908	0.0481593
ENSMUSG00000024219	ENSMUSG00000024219.17	chr17:28128280-28281749	Anks1	protein_coding	MGI:2446180	-0.0834779	0.0373271	-2.23639	0.0253264	0.277248
ENSMUSG00000024242	ENSMUSG00000024242.16	chr17:80887941-81035914	Map4k3	protein_coding	MGI:2154405	0.0797417	0.038001	2.09841	0.0358687	0.325295
ENSMUSG00000024248	ENSMUSG00000024248.15	chr17:83809347-83824759	Cox7a2l	protein_coding	MGI:106015	-0.0628386	0.0293984	-2.13748	0.0325588	0.312262
ENSMUSG00000024261	ENSMUSG00000024261.7	chr18:31570861-31580459	Syt4	protein_coding	MGI:101759	0.0948222	0.0354952	2.67141	0.00755334	0.15617
ENSMUSG00000024298	ENSMUSG00000024298.16	chr17:32984470-33007261	Zfp871	protein_coding	MGI:1921793	0.0866172	0.0385314	2.24797	0.0245783	0.274841
ENSMUSG00000024330	ENSMUSG00000024330.18	chr17:34258411-34285659	Col11a2	protein_coding	MGI:88447	-0.102697	0.0476411	-2.15564	0.0311114	0.306291
ENSMUSG00000024360	ENSMUSG00000024360.9	chr18:35035838-35065060	Etf1	protein_coding	MGI:2385071	0.0706664	0.0330523	2.13802	0.0325152	0.312254
ENSMUSG00000024381	ENSMUSG00000024381.17	chr18:32510283-32568790	Bin1	protein_coding	MGI:108092	-0.0864332	0.0291451	-2.96562	0.00302078	0.0893689
ENSMUSG00000024384	ENSMUSG00000024384.5	chr18:32200794-32237381	Iws1	protein_coding	MGI:1920723	0.0880157	0.0380169	2.31518	0.0206033	0.250247
ENSMUSG00000024395	ENSMUSG00000024395.10	chr18:32055343-32091672	Lims2	protein_coding	MGI:2385067	-0.139148	0.0536584	-2.59321	0.00950844	0.17443
ENSMUSG00000024411	ENSMUSG00000024411.12	chr18:15522553-15544039	Aqp4	protein_coding	MGI:107387	-0.106039	0.0419707	-2.52651	0.0115203	0.189168
ENSMUSG00000024413	ENSMUSG00000024413.15	chr18:12322749-12369457	Npc1	protein_coding	MGI:1097712	-0.123272	0.0451481	-2.73039	0.00632589	0.141112
ENSMUSG00000024479	ENSMUSG00000024479.4	chr15:54434588-54466243	Mal2	protein_coding	MGI:2146021	0.0780305	0.0324042	2.40803	0.0160387	0.22574
ENSMUSG00000024500	ENSMUSG00000024500.21	chr18:42770497-43216192	Ppp2r2b	protein_coding	MGI:1920180	0.0768589	0.0332607	2.3108	0.0208438	0.251227
ENSMUSG00000024502	ENSMUSG00000024502.11	chr18:43664472-43820838	Jakmip2	protein_coding	MGI:1923467	0.0838413	0.040833	2.05327	0.0400461	0.341061
ENSMUSG00000024511	ENSMUSG00000024511.16	chr18:70112202-70274676	Rab27b	protein_coding	MGI:1931295	0.101585	0.0479354	2.11921	0.0340731	0.319021
ENSMUSG00000024516	ENSMUSG00000024516.14	chr18:65933586-65950755	Sec11c	protein_coding	MGI:1913536	-0.155659	0.0411281	-3.78472	0.000153879	0.013253
ENSMUSG00000024524	ENSMUSG00000024524.18	chr18:67221287-67359863	Gnal	protein_coding	MGI:95774	0.0952403	0.043657	2.18156	0.029142	0.299175
ENSMUSG00000024544	ENSMUSG00000024544.10	chr18:68066328-68401701	Ldlrad4	protein_coding	MGI:1277150	0.0983382	0.0438711	2.24153	0.0249919	0.276279
ENSMUSG00000024597	ENSMUSG00000024597.12	chr18:58011750-58079893	Slc12a2	protein_coding	MGI:101924	-0.137746	0.0523098	-2.63327	0.0084567	0.164394
ENSMUSG00000024608	ENSMUSG00000024608.12	chr18:60880170-60911618	Rps14	protein_coding	MGI:98107	-0.0734237	0.0297018	-2.47203	0.0134348	0.20628
ENSMUSG00000024610	ENSMUSG00000024610.16	chr18:60936920-60945724	Cd74	protein_coding	MGI:96534	-0.313766	0.151433	-2.07198	0.0382673
ENSMUSG00000024639	ENSMUSG00000024639.6	chr19:16110195-16364827	Gnaq	protein_coding	MGI:95776	0.0563006	0.0280031	2.01051	0.0443772	0.356691
ENSMUSG00000024640	ENSMUSG00000024640.10	chr19:15882042-15924701	Psat1	protein_coding	MGI:2183441	-0.094525	0.0331422	-2.8521	0.00434308	0.110955
ENSMUSG00000024661	ENSMUSG00000024661.8	chr19:9957962-9962462	Fth1	protein_coding	MGI:95588	-0.137228	0.0376142	-3.6483	0.000263986	0.0181647
ENSMUSG00000024665	ENSMUSG00000024665.9	chr19:10040129-10079110	Fads2	protein_coding	MGI:1930079	-0.0868851	0.0330803	-2.62649	0.00862705	0.166021
ENSMUSG00000024725	ENSMUSG00000024725.14	chr19:18493501-18609187	Ostf1	protein_coding	MGI:700012	-0.141726	0.0593034	-2.38984	0.0168557	0.230389
ENSMUSG00000024810	ENSMUSG00000024810.17	chr19:29902514-29938118	Il33	protein_coding	MGI:1924375	-0.199642	0.0411053	-4.85686	1.19264e-06	0.000457638
ENSMUSG00000024811	ENSMUSG00000024811.12	chr19:36811632-36870877	Tnks2	protein_coding	MGI:1921743	0.070115	0.0302876	2.31497	0.0206144	0.250247
ENSMUSG00000024812	ENSMUSG00000024812.12	chr19:24071869-24202394	Tjp2	protein_coding	MGI:1341872	-0.120788	0.0376433	-3.20874	0.00133319	0.0546944
ENSMUSG00000024816	ENSMUSG00000024816.13	chr19:5899730-5925302	Frmd8	protein_coding	MGI:1914707	-0.153248	0.0422598	-3.62632	0.000287486	0.0187323
ENSMUSG00000024818	ENSMUSG00000024818.16	chr19:5927836-5935906	Slc25a45	protein_coding	MGI:2147731	-0.181457	0.0861296	-2.10679	0.035136	0.3227
ENSMUSG00000024883	ENSMUSG00000024883.9	chr19:5100509-5107099	Rin1	protein_coding	MGI:2385695	0.0762908	0.0383104	1.99139	0.0464384	0.364113
ENSMUSG00000024887	ENSMUSG00000024887.11	chr19:31959997-32085611	Asah2	protein_coding	MGI:1859310	-0.140732	0.0525667	-2.6772	0.00742393	0.154725
ENSMUSG00000024900	ENSMUSG00000024900.6	chr19:3372334-3435733	Cpt1a	protein_coding	MGI:1098296	-0.0973331	0.0475779	-2.04576	0.0407798	0.343263
ENSMUSG00000024903	ENSMUSG00000024903.11	chr4:118818775-118826109	Lao1	protein_coding	MGI:2140628	1.21519	0.593234	2.04842	0.0405188
ENSMUSG00000024940	ENSMUSG00000024940.12	chr19:5790932-5808560	Ltbp3	protein_coding	MGI:1101355	-0.101146	0.041213	-2.45422	0.0141191	0.210322
ENSMUSG00000024944	ENSMUSG00000024944.7	chr19:6184404-6191578	Arl2	protein_coding	MGI:1928393	-0.110782	0.0386223	-2.86835	0.00412619	0.109756
ENSMUSG00000024962	ENSMUSG00000024962.14	chr19:6959841-6965019	Vegfb	protein_coding	MGI:106199	-0.0801756	0.0338857	-2.36606	0.0179786	0.237372
ENSMUSG00000024975	ENSMUSG00000024975.14	chr19:53880662-53918291	Pdcd4	protein_coding	MGI:107490	0.0748211	0.0367439	2.03629	0.0417217	0.347866
ENSMUSG00000024976	ENSMUSG00000024976.15	chr19:53932737-54021564	Shoc2	protein_coding	MGI:1927197	0.0705117	0.0349619	2.01682	0.0437147	0.354421
ENSMUSG00000024981	ENSMUSG00000024981.7	chr19:55240370-55286152	Acsl5	protein_coding	MGI:1919129	0.0865798	0.040792	2.12247	0.0337983	0.318812
ENSMUSG00000025019	ENSMUSG00000025019.18	chr19:41471076-41574975	Lcor	protein_coding	MGI:2443930	0.235737	0.0721501	3.26732	0.00108572	0.0481593
ENSMUSG00000025060	ENSMUSG00000025060.16	chr19:47568117-47633685	Slk	protein_coding	MGI:103241	0.0849023	0.0361492	2.34866	0.018841	0.239753
ENSMUSG00000025137	ENSMUSG00000025137.16	chr11:120500913-120508762	Pcyt2	protein_coding	MGI:1915921	-0.0993606	0.037223	-2.66934	0.0076001	0.156215
ENSMUSG00000025170	ENSMUSG00000025170.14	chr11:121246951-121279077	Rab40b	protein_coding	MGI:2183451	0.145082	0.0341293	4.25094	2.12871e-05	0.00320209
ENSMUSG00000025202	ENSMUSG00000025202.9	chr19:44191708-44232455	Scd3	protein_coding	MGI:1353437	-0.232245	0.100259	-2.31645	0.0205335	0.250036
ENSMUSG00000025203	ENSMUSG00000025203.7	chr19:44282113-44295303	Scd2	protein_coding	MGI:98240	-0.104441	0.0265394	-3.93533	8.30831e-05	0.0083409
ENSMUSG00000025220	ENSMUSG00000025220.9	chr19:45738698-45772276	Oga	protein_coding	MGI:1932139	0.0850379	0.0318868	2.66687	0.00765608	0.156552
ENSMUSG00000025262	ENSMUSG00000025262.9	chrX:150127171-150254838	Fam120c	protein_coding	MGI:2387687	0.0892101	0.0446706	1.99706	0.0458182	0.362552
ENSMUSG00000025323	ENSMUSG00000025323.11	chr12:118198668-118265175	Sp4	protein_coding	MGI:107595	0.094481	0.0428591	2.20446	0.0274923	0.290098
ENSMUSG00000025348	ENSMUSG00000025348.10	chr10:128769687-128794151	Itga7	protein_coding	MGI:102700	-0.17524	0.0662458	-2.6453	0.00816183	0.162906
ENSMUSG00000025351	ENSMUSG00000025351.15	chr10:128736858-128748691	Cd63	protein_coding	MGI:99529	-0.145678	0.034249	-4.25349	2.10465e-05	0.00320209
ENSMUSG00000025372	ENSMUSG00000025372.17	chr11:119833589-119897608	Baiap2	protein_coding	MGI:2137336	0.0818421	0.0313766	2.60838	0.00909721	0.17072
ENSMUSG00000025437	ENSMUSG00000025437.16	chr3:152052115-152099254	Usp33	protein_coding	MGI:2159711	0.0705929	0.0348549	2.02534	0.0428328	0.352334
ENSMUSG00000025465	ENSMUSG00000025465.14	chr7:139685623-139696389	Echs1	protein_coding	MGI:2136460	-0.121187	0.0388846	-3.11657	0.00182966	0.0665995
ENSMUSG00000025503	ENSMUSG00000025503.6	chr7:140972112-140982881	Taldo1	protein_coding	MGI:1274789	-0.0824786	0.0312997	-2.63512	0.00841079	0.164394
ENSMUSG00000025505	ENSMUSG00000025505.17	chr7:140907652-140917069	Tmem80	protein_coding	MGI:1918698	-0.0971413	0.0459295	-2.11501	0.0344294	0.320053
ENSMUSG00000025582	ENSMUSG00000025582.5	chr11:119429545-119438579	Nptx1	protein_coding	MGI:107811	0.136905	0.0408308	3.35298	0.000799472	0.039087
ENSMUSG00000025584	ENSMUSG00000025584.18	chr7:80863344-80984281	Pde8a	protein_coding	MGI:1277116	-0.162058	0.0472331	-3.43103	0.000601294	0.0320485
ENSMUSG00000025597	ENSMUSG00000025597.14	chrX:113384030-113470526	Klhl4	protein_coding	MGI:2442829	-0.117768	0.0469413	-2.50885	0.0121126	0.194715
ENSMUSG00000025702	ENSMUSG00000025702.16	chr6:116314985-116386501	Marchf8	protein_coding	MGI:1919029	-0.066947	0.0308665	-2.16892	0.0300887	0.301959
ENSMUSG00000025777	ENSMUSG00000025777.9	chr1:17215586-17234495	Gdap1	protein_coding	MGI:1338002	0.105173	0.0344407	3.05373	0.00226012	0.0740374
ENSMUSG00000025790	ENSMUSG00000025790.15	chr7:73925167-74204528	Slco3a1	protein_coding	MGI:1351867	-0.0897785	0.0402182	-2.23229	0.025596	0.278092
ENSMUSG00000025812	ENSMUSG00000025812.19	chr8:127790643-128338767	Pard3	protein_coding	MGI:2135608	0.0854338	0.0396651	2.15388	0.0312499	0.306953
ENSMUSG00000025813	ENSMUSG00000025813.15	chr7:81250229-81357275	Homer2	protein_coding	MGI:1347354	0.158519	0.0692619	2.2887	0.022097	0.257977
ENSMUSG00000025825	ENSMUSG00000025825.13	chr5:113910809-113916349	Iscu	protein_coding	MGI:1913633	-0.100332	0.0355105	-2.82543	0.00472168	0.116905
ENSMUSG00000025856	ENSMUSG00000025856.16	chr5:138961769-138983125	Pdgfa	protein_coding	MGI:97527	-0.0777793	0.0388415	-2.00248	0.0452336	0.359135
ENSMUSG00000025860	ENSMUSG00000025860.16	chrX:41148556-41198533	Xiap	protein_coding	MGI:107572	0.0883744	0.0349418	2.52919	0.0114327	0.188444
ENSMUSG00000025885	ENSMUSG00000025885.19	chr18:74574007-74904564	Myo5b	protein_coding	MGI:106598	0.13633	0.0515409	2.64508	0.0081672	0.162906
ENSMUSG00000025889	ENSMUSG00000025889.14	chr6:60708559-60806839	Snca	protein_coding	MGI:1277151	0.111243	0.0398877	2.78891	0.00528854	0.123817
ENSMUSG00000025899	ENSMUSG00000025899.15	chr9:3335140-3391154	Alkbh8	protein_coding	MGI:1914917	0.0834948	0.0411923	2.02695	0.0426671	0.351639
ENSMUSG00000025903	ENSMUSG00000025903.15	chr1:4878011-4918633	Lypla1	protein_coding	MGI:1344588	-0.105418	0.0448708	-2.34936	0.0188055	0.239555
ENSMUSG00000025931	ENSMUSG00000025931.16	chr1:20960830-21009874	Paqr8	protein_coding	MGI:1921479	-0.0990539	0.0424962	-2.33089	0.0197592	0.245902
ENSMUSG00000025946	ENSMUSG00000025946.14	chr1:65321215-65428403	Pth2r	protein_coding	MGI:2180917	0.43532	0.218179	1.99525	0.0460161
ENSMUSG00000025958	ENSMUSG00000025958.15	chr1:64571804-64643707	Creb1	protein_coding	MGI:88494	0.0814929	0.0342067	2.38237	0.0172018	0.232594
ENSMUSG00000025986	ENSMUSG00000025986.7	chr1:46846704-46932012	Slc39a10	protein_coding	MGI:1914515	0.137763	0.0350663	3.92863	8.54301e-05	0.00835353
ENSMUSG00000026000	ENSMUSG00000026000.17	chr1:67039676-67078031	Lancl1	protein_coding	MGI:1336997	0.0571266	0.0273343	2.08992	0.0366246	0.328258
ENSMUSG00000026017	ENSMUSG00000026017.14	chr1:60137406-60193112	Carf	protein_coding	MGI:2182269	0.140535	0.042865	3.27854	0.00104347	0.0472835
ENSMUSG00000026018	ENSMUSG00000026018.13	chr1:60021649-60082343	Ica1l	protein_coding	MGI:1917625	0.0921353	0.0354424	2.59958	0.0093338	0.172423
ENSMUSG00000026024	ENSMUSG00000026024.15	chr1:59202085-59276390	Als2	protein_coding	MGI:1921268	0.116425	0.0371784	3.13153	0.00173899	0.0649874
ENSMUSG00000026074	ENSMUSG00000026074.16	chr1:39940073-40065470	Map4k4	protein_coding	MGI:1349394	-0.0599914	0.029053	-2.0649	0.0389329	0.337141
ENSMUSG00000026090	ENSMUSG00000026090.17	chr1:37650758-37759166	Cracdl	protein_coding	MGI:1919347	0.094762	0.0305715	3.09969	0.00193725	0.0682763
ENSMUSG00000026113	ENSMUSG00000026113.18	chr1:37338946-37449817	Inpp4a	protein_coding	MGI:1931123	0.0852588	0.0357285	2.3863	0.0170189	0.231518
ENSMUSG00000026153	ENSMUSG00000026153.16	chr1:24050174-24139422	Fam135a	protein_coding	MGI:1915437	0.0908767	0.0433871	2.09456	0.0362104	0.326119
ENSMUSG00000026154	ENSMUSG00000026154.5	chr1:24035020-24044737	Sdhaf4	protein_coding	MGI:1915252	-0.115795	0.0544037	-2.12844	0.0333006	0.316113
ENSMUSG00000026163	ENSMUSG00000026163.18	chr1:83231860-83385921	Sphkap	protein_coding	MGI:1924879	0.142253	0.0523469	2.71751	0.00657745	0.145083
ENSMUSG00000026176	ENSMUSG00000026176.14	chr1:74430668-74436444	Ctdsp1	protein_coding	MGI:2654470	-0.0754024	0.0373764	-2.01738	0.0436558	0.354175
ENSMUSG00000026185	ENSMUSG00000026185.9	chr1:72897091-72914043	Igfbp5	protein_coding	MGI:96440	-0.122747	0.037851	-3.24289	0.00118325	0.0506191
ENSMUSG00000026203	ENSMUSG00000026203.17	chr1:75213050-75222336	Dnajb2	protein_coding	MGI:1928739	-0.102049	0.0357954	-2.85089	0.00435971	0.110955
ENSMUSG00000026220	ENSMUSG00000026220.7	chr1:84883619-84912855	Slc16a14	protein_coding	MGI:1919031	0.233743	0.0927477	2.52021	0.0117286	0.190504
ENSMUSG00000026238	ENSMUSG00000026238.15	chr1:86454448-86458434	Ptma	protein_coding	MGI:97803	-0.079442	0.038648	-2.05553	0.039828	0.339648
ENSMUSG00000026255	ENSMUSG00000026255.16	chr1:87192085-87238561	Efhd1	protein_coding	MGI:1921607	-0.168013	0.0496241	-3.38572	0.000709926	0.0364924
ENSMUSG00000026275	ENSMUSG00000026275.14	chr1:93270576-93301211	Ppp1r7	protein_coding	MGI:1913635	0.0640607	0.0317292	2.01899	0.0434887	0.353261
ENSMUSG00000026335	ENSMUSG00000026335.17	chr1:97722839-98023371	Pam	protein_coding	MGI:97475	0.0835647	0.0282253	2.96064	0.00307003	0.0897918
ENSMUSG00000026349	ENSMUSG00000026349.15	chr1:127701901-127735798	Ccnt2	protein_coding	MGI:1920199	0.103334	0.0356303	2.90018	0.00372946	0.102954
ENSMUSG00000026380	ENSMUSG00000026380.11	chr1:118555675-118612898	Tfcp2l1	protein_coding	MGI:2444691	0.231352	0.109132	2.11994	0.0340115	0.319021
ENSMUSG00000026385	ENSMUSG00000026385.17	chr1:120041010-120048808	Dbi	protein_coding	MGI:94865	-0.0894293	0.0371322	-2.4084	0.0160225	0.22574
ENSMUSG00000026393	ENSMUSG00000026393.11	chr1:138410613-138547879	Nek7	protein_coding	MGI:1890645	-0.0849398	0.038343	-2.21526	0.0267421	0.284833
ENSMUSG00000026418	ENSMUSG00000026418.17	chr1:135707172-135738727	Tnni1	protein_coding	MGI:105073	-0.14739	0.0751895	-1.96025	0.049967	0.376489
ENSMUSG00000026421	ENSMUSG00000026421.15	chr1:135647799-135679970	Csrp1	protein_coding	MGI:88549	-0.169852	0.0338902	-5.01184	5.39115e-07	0.000318691
ENSMUSG00000026424	ENSMUSG00000026424.9	chr1:135087972-135095419	Gpr37l1	protein_coding	MGI:1928503	-0.0834639	0.0365414	-2.28409	0.0223663	0.259083
ENSMUSG00000026435	ENSMUSG00000026435.16	chr1:131890705-131910707	Slc45a3	protein_coding	MGI:1922082	-0.226002	0.11247	-2.00945	0.0444896	0.357294
ENSMUSG00000026452	ENSMUSG00000026452.16	chr1:134574415-134690331	Syt2	protein_coding	MGI:99666	-0.21454	0.0956365	-2.24328	0.0248786	0.276059
ENSMUSG00000026463	ENSMUSG00000026463.18	chr1:133627195-133728779	Atp2b4	protein_coding	MGI:88111	0.300612	0.101023	2.97568	0.00292343	0.0884168
ENSMUSG00000026469	ENSMUSG00000026469.15	chr1:155151447-155293161	Xpr1	protein_coding	MGI:97932	0.104054	0.0326476	3.1872	0.00143656	0.0576619
ENSMUSG00000026473	ENSMUSG00000026473.17	chr1:153775690-153785469	Glul	protein_coding	MGI:95739	-0.081912	0.0345107	-2.37352	0.0176193	0.235497
ENSMUSG00000026482	ENSMUSG00000026482.14	chr1:152392511-152642102	Rgl1	protein_coding	MGI:107484	0.152051	0.0337633	4.50345	6.68595e-06	0.00142542
ENSMUSG00000026519	ENSMUSG00000026519.17	chr1:180769909-180802677	Tmem63a	protein_coding	MGI:2384789	-0.235793	0.0444234	-5.30785	1.10923e-07	8.48561e-05
ENSMUSG00000026547	ENSMUSG00000026547.16	chr1:172327614-172334947	Tagln2	protein_coding	MGI:1312985	-0.133926	0.0640113	-2.09223	0.0364177	0.326854
ENSMUSG00000026548	ENSMUSG00000026548.5	chr1:172302925-172306142	Slamf9	protein_coding	MGI:1923692	-0.399277	0.195402	-2.04336	0.0410173
ENSMUSG00000026566	ENSMUSG00000026566.16	chr1:165419809-165462107	Mpzl1	protein_coding	MGI:1915731	-0.130729	0.0489867	-2.66866	0.00761556	0.156215
ENSMUSG00000026571	ENSMUSG00000026571.13	chr1:165156267-165288044	Dcaf6	protein_coding	MGI:1921356	0.0841559	0.0291096	2.891	0.00384015	0.104667
ENSMUSG00000026584	ENSMUSG00000026584.15	chr1:163756669-163782695	Scyl3	protein_coding	MGI:1921385	0.080581	0.0404541	1.99191	0.0463808	0.364113
ENSMUSG00000026610	ENSMUSG00000026610.14	chr1:187340988-187947082	Esrrg	protein_coding	MGI:1347056	-0.235503	0.102749	-2.29203	0.0219042	0.25733
ENSMUSG00000026663	ENSMUSG00000026663.7	chr1:170532243-170695340	Atf6	protein_coding	MGI:1926157	0.0716255	0.0347432	2.06157	0.0392489	0.337141
ENSMUSG00000026664	ENSMUSG00000026664.8	chr2:4923830-4943541	Phyh	protein_coding	MGI:891978	-0.0926524	0.0407566	-2.27331	0.0230076	0.264932
ENSMUSG00000026678	ENSMUSG00000026678.11	chr1:169483070-169523382	Rgs5	protein_coding	MGI:1098434	-0.1105	0.0418237	-2.64204	0.00824083	0.163661
ENSMUSG00000026688	ENSMUSG00000026688.6	chr1:167199535-167221410	Mgst3	protein_coding	MGI:1913697	-0.115494	0.0483497	-2.38873	0.0169068	0.230389
ENSMUSG00000026701	ENSMUSG00000026701.16	chr1:161067682-161078789	Prdx6	protein_coding	MGI:894320	-0.0735616	0.0355902	-2.06691	0.038743	0.337141
ENSMUSG00000026721	ENSMUSG00000026721.17	chr1:160046744-160620781	Rabgap1l	protein_coding	MGI:1352507	0.116245	0.0334528	3.4749	0.000511051	0.0287715
ENSMUSG00000026737	ENSMUSG00000026737.13	chr2:18847066-19002937	Pip4k2a	protein_coding	MGI:1298206	-0.077407	0.0367858	-2.10427	0.0353553	0.324257
ENSMUSG00000026775	ENSMUSG00000026775.10	chr2:23046381-23089272	Yme1l1	protein_coding	MGI:1351651	0.0765337	0.0318925	2.39974	0.0164068	0.229093
ENSMUSG00000026778	ENSMUSG00000026778.14	chr2:11176919-11306033	Prkcq	protein_coding	MGI:97601	-0.105696	0.0534548	-1.9773	0.0480079	0.368674
ENSMUSG00000026796	ENSMUSG00000026796.17	chr2:32766126-32815266	Niban2	protein_coding	MGI:2442910	-0.115625	0.0358612	-3.22424	0.00126308	0.0527809
ENSMUSG00000026825	ENSMUSG00000026825.18	chr2:32198483-32243350	Dnm1	protein_coding	MGI:107384	0.0499931	0.0246509	2.02804	0.042556	0.351168
ENSMUSG00000026833	ENSMUSG00000026833.19	chr2:28083004-28120748	Olfm1	protein_coding	MGI:1860437	0.0897139	0.0397629	2.25622	0.0240566	0.271576
ENSMUSG00000026879	ENSMUSG00000026879.15	chr2:35146392-35197904	Gsn	protein_coding	MGI:95851	-0.12278	0.0400727	-3.06394	0.00218441	0.0727763
ENSMUSG00000026895	ENSMUSG00000026895.8	chr2:35926338-35939418	Ndufa8	protein_coding	MGI:1915625	-0.0810866	0.0371603	-2.18208	0.029104	0.299175
ENSMUSG00000026932	ENSMUSG00000026932.15	chr2:25945547-26013232	Nacc2	protein_coding	MGI:1915241	-0.104785	0.0355464	-2.94784	0.00319999	0.0916648
ENSMUSG00000026933	ENSMUSG00000026933.18	chr2:25816850-25873294	Camsap1	protein_coding	MGI:3036242	0.102446	0.0339923	3.01381	0.00257989	0.0805978
ENSMUSG00000026991	ENSMUSG00000026991.21	chr2:58991194-59185552	Pkp4	protein_coding	MGI:109281	-0.0838123	0.0293151	-2.85901	0.00424962	0.110696
ENSMUSG00000027004	ENSMUSG00000027004.4	chr2:80242314-80277969	Frzb	protein_coding	MGI:892032	0.258093	0.0818846	3.15191	0.00162207	0.0623663
ENSMUSG00000027006	ENSMUSG00000027006.14	chr2:80145810-80184387	Dnajc10	protein_coding	MGI:1914111	0.0861215	0.0356131	2.41825	0.0155952	0.22312
ENSMUSG00000027014	ENSMUSG00000027014.15	chr2:77711503-77776719	Cwc22	protein_coding	MGI:2136773	0.0941173	0.0477899	1.9694	0.0489075	0.371086
ENSMUSG00000027130	ENSMUSG00000027130.16	chr2:112096170-112193508	Slc12a6	protein_coding	MGI:2135960	0.0720727	0.0342815	2.10238	0.0355199	0.324642
ENSMUSG00000027162	ENSMUSG00000027162.8	chr2:109721198-109731348	Lin7c	protein_coding	MGI:1330839	0.0757999	0.0317064	2.39068	0.0168173	0.230389
ENSMUSG00000027173	ENSMUSG00000027173.8	chr2:104552129-104573223	Depdc7	protein_coding	MGI:2139258	-0.302345	0.141156	-2.14192	0.0321998
ENSMUSG00000027189	ENSMUSG00000027189.17	chr2:102130464-102238173	Trim44	protein_coding	MGI:1931835	0.0889563	0.0293621	3.02963	0.0024485	0.077855
ENSMUSG00000027215	ENSMUSG00000027215.14	chr2:93249456-93293485	Cd82	protein_coding	MGI:104651	-0.144312	0.0540661	-2.66917	0.00760385	0.156215
ENSMUSG00000027238	ENSMUSG00000027238.18	chr2:121376010-121637568	Frmd5	protein_coding	MGI:2442557	-0.0806541	0.0401643	-2.0081	0.0446324	0.357636
ENSMUSG00000027257	ENSMUSG00000027257.14	chr2:91086299-91095024	Pacsin3	protein_coding	MGI:1891410	-0.11113	0.0480863	-2.31105	0.0208299	0.251227
ENSMUSG00000027274	ENSMUSG00000027274.17	chr2:136715700-136733309	Mkks	protein_coding	MGI:1891836	0.116877	0.052056	2.24521	0.0247544	0.275626
ENSMUSG00000027298	ENSMUSG00000027298.18	chr2:119628214-119648585	Tyro3	protein_coding	MGI:104294	0.0567299	0.0282153	2.01061	0.0443666	0.356691
ENSMUSG00000027327	ENSMUSG00000027327.17	chr2:130988244-131002001	1700037H04Rik	protein_coding	MGI:1914576	0.0986422	0.0379288	2.60072	0.0093029	0.172342
ENSMUSG00000027339	ENSMUSG00000027339.16	chr2:131831335-131872178	Rassf2	protein_coding	MGI:2442060	-0.0876743	0.0295806	-2.96391	0.00303753	0.0893735
ENSMUSG00000027347	ENSMUSG00000027347.19	chr2:117110474-117173482	Rasgrp1	protein_coding	MGI:1314635	0.0923822	0.0331566	2.78624	0.00533233	0.124055
ENSMUSG00000027350	ENSMUSG00000027350.9	chr2:132623198-132636999	Chgb	protein_coding	MGI:88395	0.0779053	0.038054	2.04723	0.0406355	0.343159
ENSMUSG00000027375	ENSMUSG00000027375.15	chr2:127475146-127498615	Mal	protein_coding	MGI:892970	-0.143003	0.0467174	-3.06101	0.0022059	0.0729967
ENSMUSG00000027394	ENSMUSG00000027394.14	chr2:128907862-128938203	Ttl	protein_coding	MGI:1916987	0.070347	0.0351117	2.00352	0.0451217	0.359046
ENSMUSG00000027419	ENSMUSG00000027419.10	chr2:143388076-143658205	Pcsk2	protein_coding	MGI:97512	0.0875121	0.0277827	3.14988	0.00163336	0.0624457
ENSMUSG00000027422	ENSMUSG00000027422.16	chr2:143789315-143853183	Rrbp1	protein_coding	MGI:1932395	-0.0883616	0.0374361	-2.36034	0.0182584	0.238046
ENSMUSG00000027433	ENSMUSG00000027433.6	chr2:146854916-146919920	Xrn2	protein_coding	MGI:894687	0.0679614	0.0321602	2.11321	0.0345824	0.32024
ENSMUSG00000027438	ENSMUSG00000027438.15	chr2:148535905-148574387	Napb	protein_coding	MGI:104562	0.117768	0.0271289	4.34105	1.41803e-05	0.00256132
ENSMUSG00000027499	ENSMUSG00000027499.13	chr3:7431729-7510426	Pkia	protein_coding	MGI:104747	0.0790643	0.036916	2.14174	0.0322148	0.311534
ENSMUSG00000027534	ENSMUSG00000027534.17	chr3:10482877-10505162	Snx16	protein_coding	MGI:1921968	0.0935946	0.0468749	1.99669	0.0458592	0.362552
ENSMUSG00000027562	ENSMUSG00000027562.13	chr3:14951333-14965830	Car2	protein_coding	MGI:88269	-0.211887	0.0368529	-5.74955	8.94834e-09	1.66247e-05
ENSMUSG00000027583	ENSMUSG00000027583.14	chr2:181029555-181101219	Zbtb46	protein_coding	MGI:1919397	0.184003	0.085559	2.1506	0.0315079	0.308007
ENSMUSG00000027602	ENSMUSG00000027602.10	chr2:155118217-155119993	Map1lc3a	protein_coding	MGI:1915661	-0.0643728	0.0278693	-2.30981	0.0208989	0.25153
ENSMUSG00000027605	ENSMUSG00000027605.19	chr2:155359868-155427644	Acss2	protein_coding	MGI:1890410	-0.0847819	0.0360876	-2.34933	0.018807	0.239555
ENSMUSG00000027610	ENSMUSG00000027610.18	chr2:155405101-155434730	Gss	protein_coding	MGI:95852	-0.137309	0.052197	-2.63059	0.00852371	0.165202
ENSMUSG00000027660	ENSMUSG00000027660.17	chr3:31149207-31176726	Skil	protein_coding	MGI:106203	0.102641	0.0426858	2.40457	0.0161916	0.227399
ENSMUSG00000027674	ENSMUSG00000027674.17	chr3:33003557-33197396	Pex5l	protein_coding	MGI:1916672	-0.0864132	0.0397474	-2.17406	0.0297004	0.299887
ENSMUSG00000027695	ENSMUSG00000027695.17	chr3:27992844-28187511	Pld1	protein_coding	MGI:109585	-0.141563	0.0630403	-2.2456	0.0247296	0.275626
ENSMUSG00000027698	ENSMUSG00000027698.15	chr3:27237114-27338757	Nceh1	protein_coding	MGI:2443191	0.0610133	0.0309789	1.96951	0.0488944	0.371086
ENSMUSG00000027712	ENSMUSG00000027712.14	chr3:36503072-36530043	Anxa5	protein_coding	MGI:106008	-0.132026	0.0359305	-3.67449	0.000238324	0.0175398
ENSMUSG00000027792	ENSMUSG00000027792.12	chr3:73543141-73615748	Bche	protein_coding	MGI:894278	-0.153275	0.0769603	-1.99162	0.0464132	0.364113
ENSMUSG00000027797	ENSMUSG00000027797.16	chr3:55149785-55446489	Dclk1	protein_coding	MGI:1330861	0.102104	0.0380854	2.68091	0.00734221	0.153679
ENSMUSG00000027824	ENSMUSG00000027824.6	chr3:63988968-64016905	Vmn2r1	protein_coding	MGI:3645892	0.668737	0.317567	2.10581	0.0352208
ENSMUSG00000027834	ENSMUSG00000027834.16	chr3:75464854-75550802	Serpini1	protein_coding	MGI:1194506	0.163768	0.0433417	3.77852	0.000157761	0.0134401
ENSMUSG00000027854	ENSMUSG00000027854.13	chr3:102903024-102915775	Sike1	protein_coding	MGI:1913891	0.0802266	0.0366461	2.18923	0.0285803	0.29735
ENSMUSG00000027858	ENSMUSG00000027858.14	chr3:102641845-102708829	Tspan2	protein_coding	MGI:1917997	-0.132205	0.0431865	-3.06124	0.00220419	0.0729967
ENSMUSG00000027882	ENSMUSG00000027882.19	chr3:108700492-108747842	Stxbp3	protein_coding	MGI:107362	-0.146953	0.0412631	-3.56137	0.000368925	0.02211
ENSMUSG00000027894	ENSMUSG00000027894.15	chr3:107374859-107425334	Slc6a17	protein_coding	MGI:2442535	0.071673	0.0310504	2.30828	0.0209836	0.25153
ENSMUSG00000027931	ENSMUSG00000027931.13	chr3:90357898-90373173	Npr1	protein_coding	MGI:97371	-0.212064	0.0933335	-2.27211	0.0230797	0.265017
ENSMUSG00000027942	ENSMUSG00000027942.18	chr3:89958943-89970648	4933434E20Rik	protein_coding	MGI:1914027	-0.0773471	0.0332496	-2.32626	0.0200048	0.247537
ENSMUSG00000027954	ENSMUSG00000027954.10	chr3:89179040-89188449	Efna1	protein_coding	MGI:103236	-0.25949	0.0887841	-2.92271	0.00346999	0.097467
ENSMUSG00000027956	ENSMUSG00000027956.12	chr3:79719871-79760080	Tmem144	protein_coding	MGI:1917902	-0.236725	0.0591033	-4.00528	6.19429e-05	0.00712892
ENSMUSG00000027977	ENSMUSG00000027977.16	chr3:123319815-123484502	Ndst3	protein_coding	MGI:1932544	0.324302	0.0771498	4.20353	2.62781e-05	0.00375546
ENSMUSG00000027978	ENSMUSG00000027978.10	chr3:123240562-123300246	Prss12	protein_coding	MGI:1100881	0.602041	0.213422	2.8209	0.00478894	0.117955
ENSMUSG00000027984	ENSMUSG00000027984.9	chr3:131027068-131065750	Hadh	protein_coding	MGI:96009	-0.0995508	0.0424387	-2.34576	0.0189885	0.240923
ENSMUSG00000027985	ENSMUSG00000027985.15	chr3:130904120-131018005	Lef1	protein_coding	MGI:96770	-0.223324	0.0908036	-2.45942	0.0139161	0.209383
ENSMUSG00000028005	ENSMUSG00000028005.14	chr3:81939313-81981996	Gucy1b1	protein_coding	MGI:1860604	0.0959705	0.0346915	2.7664	0.00566791	0.130002
ENSMUSG00000028007	ENSMUSG00000028007.14	chr3:117575296-117662585	Snx7	protein_coding	MGI:1923811	0.159415	0.0573374	2.7803	0.00543084	0.125839
ENSMUSG00000028031	ENSMUSG00000028031.7	chr3:131791053-131886065	Dkk2	protein_coding	MGI:1890663	-0.296642	0.122357	-2.42439	0.0153343
ENSMUSG00000028033	ENSMUSG00000028033.17	chr1:21468627-22032166	Kcnq5	protein_coding	MGI:1924937	0.146208	0.0394343	3.70763	0.000209204	0.0162916
ENSMUSG00000028036	ENSMUSG00000028036.7	chr3:151502139-151543267	Ptgfr	protein_coding	MGI:97796	-0.528076	0.240112	-2.19929	0.027857
ENSMUSG00000028042	ENSMUSG00000028042.16	chr3:89284951-89302083	Zbtb7b	protein_coding	MGI:102755	-0.150656	0.0598847	-2.51577	0.0118772	0.192342
ENSMUSG00000028081	ENSMUSG00000028081.7	chr3:86045247-86050009	Rps3a1	protein_coding	MGI:1202063	-0.0635652	0.0285442	-2.22691	0.0259535	0.28057
ENSMUSG00000028164	ENSMUSG00000028164.16	chr3:135191372-135277165	Manba	protein_coding	MGI:88175	-0.139139	0.0666092	-2.08889	0.0367178	0.328634
ENSMUSG00000028176	ENSMUSG00000028176.14	chr3:157788528-158267858	Lrrc7	protein_coding	MGI:2676665	0.189173	0.0955505	1.97982	0.0477233	0.367871
ENSMUSG00000028195	ENSMUSG00000028195.5	chr3:145352731-145355736	Ccn1	protein_coding	MGI:88613	0.209929	0.106796	1.9657	0.0493332	0.372873
ENSMUSG00000028222	ENSMUSG00000028222.3	chr4:15881264-15908064	Calb1	protein_coding	MGI:88248	0.118308	0.0430638	2.74728	0.00600924	0.135519
ENSMUSG00000028226	ENSMUSG00000028226.16	chr4:17852893-18119145	Mmp16	protein_coding	MGI:1276107	0.159545	0.0568533	2.80625	0.00501215	0.121384
ENSMUSG00000028243	ENSMUSG00000028243.6	chr4:6191098-6221688	Ubxn2b	protein_coding	MGI:1915303	0.130317	0.0357025	3.65007	0.000262167	0.0181355
ENSMUSG00000028246	ENSMUSG00000028246.14	chr4:21931329-21996839	Faxc	protein_coding	MGI:1923382	0.208686	0.0481688	4.33238	1.47503e-05	0.00259226
ENSMUSG00000028278	ENSMUSG00000028278.15	chr4:32983037-33022180	Rragd	protein_coding	MGI:1098604	0.0933293	0.0347388	2.6866	0.00721823	0.152144
ENSMUSG00000028289	ENSMUSG00000028289.13	chr4:28813131-28967499	Epha7	protein_coding	MGI:95276	0.116951	0.0376758	3.10414	0.00190833	0.0678183
ENSMUSG00000028333	ENSMUSG00000028333.11	chr4:46450902-46472657	Anp32b	protein_coding	MGI:1914878	-0.0867933	0.0351238	-2.47107	0.013471	0.206593
ENSMUSG00000028399	ENSMUSG00000028399.19	chr4:75859475-78130198	Ptprd	protein_coding	MGI:97812	-0.0930375	0.0416222	-2.23529	0.0253986	0.277575
ENSMUSG00000028412	ENSMUSG00000028412.18	chr4:53440413-53622478	Slc44a1	protein_coding	MGI:2140592	-0.131096	0.0363741	-3.60409	0.000313252	0.0196804
ENSMUSG00000028414	ENSMUSG00000028414.18	chr4:53713998-53777890	Fktn	protein_coding	MGI:2179507	0.122141	0.040479	3.0174	0.00254952	0.0800883
ENSMUSG00000028426	ENSMUSG00000028426.11	chr4:55350043-55392237	Rad23b	protein_coding	MGI:105128	0.0608913	0.0262712	2.3178	0.0204604	0.250036
ENSMUSG00000028441	ENSMUSG00000028441.13	chr4:41505009-41517333	1110017D15Rik	protein_coding	MGI:1920971	-0.313356	0.144007	-2.17597	0.0295574
ENSMUSG00000028445	ENSMUSG00000028445.8	chr4:41638144-41640324	Enho	protein_coding	MGI:1916888	-0.135706	0.044782	-3.03036	0.00244263	0.077855
ENSMUSG00000028464	ENSMUSG00000028464.17	chr4:43514711-43523765	Tpm2	protein_coding	MGI:98810	-0.119985	0.0597307	-2.00876	0.0445622	0.357294
ENSMUSG00000028488	ENSMUSG00000028488.16	chr4:85123363-85557432	Sh3gl2	protein_coding	MGI:700009	0.079392	0.038362	2.06954	0.038495	0.336329
ENSMUSG00000028495	ENSMUSG00000028495.15	chr4:86772897-86775649	Rps6	protein_coding	MGI:98159	-0.0745027	0.0292483	-2.54725	0.0108576	0.185012
ENSMUSG00000028496	ENSMUSG00000028496.18	chr4:87688162-87951601	Mllt3	protein_coding	MGI:1917372	0.107359	0.0476998	2.25072	0.0244031	0.273824
ENSMUSG00000028524	ENSMUSG00000028524.22	chr4:102598494-102830825	Sgip1	protein_coding	MGI:1920344	0.118311	0.029737	3.97857	6.93316e-05	0.00751382
ENSMUSG00000028525	ENSMUSG00000028525.17	chr4:101944740-102464456	Pde4b	protein_coding	MGI:99557	0.0971942	0.0333724	2.91241	0.00358646	0.0994497
ENSMUSG00000028530	ENSMUSG00000028530.15	chr4:101009564-101122479	Jak1	protein_coding	MGI:96628	0.0628802	0.0298725	2.10495	0.0352957	0.323939
ENSMUSG00000028542	ENSMUSG00000028542.18	chr4:117691703-117732395	Slc6a9	protein_coding	MGI:95760	-0.210132	0.0526773	-3.98904	6.63399e-05	0.00737394
ENSMUSG00000028555	ENSMUSG00000028555.16	chr4:109263820-109301942	Ttc39a	protein_coding	MGI:2444350	-0.312904	0.12693	-2.46518	0.0136945
ENSMUSG00000028572	ENSMUSG00000028572.14	chr4:95855477-95913650	Hook1	protein_coding	MGI:1925213	0.0908103	0.0446742	2.03272	0.0420804	0.34891
ENSMUSG00000028584	ENSMUSG00000028584.4	chr4:143076327-143097602	Lrrc38	protein_coding	MGI:2442845	-0.326338	0.145971	-2.23564	0.0253756
ENSMUSG00000028630	ENSMUSG00000028630.10	chr10:118691508-118706114	Dyrk2	protein_coding	MGI:1330301	0.0969157	0.0441424	2.19553	0.0281259	0.294417
ENSMUSG00000028637	ENSMUSG00000028637.17	chr4:119179663-119272718	Ccdc30	protein_coding	MGI:1920582	0.146581	0.0507091	2.89062	0.00384477	0.104667
ENSMUSG00000028643	ENSMUSG00000028643.12	chr4:119052503-119058495	Svbp	protein_coding	MGI:1916466	-0.143728	0.0641345	-2.24103	0.0250239	0.276279
ENSMUSG00000028670	ENSMUSG00000028670.15	chr4:135695535-135699937	Lypla2	protein_coding	MGI:1347000	-0.0801067	0.0321975	-2.48798	0.0128472	0.200093
ENSMUSG00000028677	ENSMUSG00000028677.20	chr4:117128660-117354249	Rnf220	protein_coding	MGI:1913993	-0.0529696	0.0267018	-1.98375	0.047284	0.36651
ENSMUSG00000028680	ENSMUSG00000028680.15	chr4:116985852-116991160	Plk3	protein_coding	MGI:109604	-0.205137	0.0795841	-2.57762	0.00994845	0.177475
ENSMUSG00000028759	ENSMUSG00000028759.14	chr4:137943607-137971994	Hp1bp3	protein_coding	MGI:109369	0.0576039	0.0287582	2.00304	0.0451726	0.359089
ENSMUSG00000028766	ENSMUSG00000028766.11	chr4:137469044-137523695	Alpl	protein_coding	MGI:87983	-0.131752	0.0627111	-2.10093	0.035647	0.324642
ENSMUSG00000028782	ENSMUSG00000028782.15	chr4:129878663-129916426	Adgrb2	protein_coding	MGI:2451244	0.0743553	0.0307113	2.42111	0.0154733	0.222056
ENSMUSG00000028878	ENSMUSG00000028878.12	chr4:132626524-132649869	Fam76a	protein_coding	MGI:2385211	0.0680755	0.0327174	2.08071	0.0374605	0.331411
ENSMUSG00000028909	ENSMUSG00000028909.18	chr4:131495768-131565599	Ptpru	protein_coding	MGI:1321151	0.140575	0.0601895	2.33554	0.0195152	0.244268
ENSMUSG00000028917	ENSMUSG00000028917.15	chr4:141353045-141392210	Plekhm2	protein_coding	MGI:1916832	-0.0865341	0.0414383	-2.08826	0.0367741	0.328692
ENSMUSG00000028926	ENSMUSG00000028926.16	chr5:4853391-5470312	Cdk14	protein_coding	MGI:894318	0.0956314	0.0362749	2.63629	0.00838169	0.164394
ENSMUSG00000028927	ENSMUSG00000028927.7	chr4:140633655-140679897	Padi2	protein_coding	MGI:1338892	-0.208434	0.0503467	-4.13997	3.4735e-05	0.00456292
ENSMUSG00000028937	ENSMUSG00000028937.15	chr4:152262591-152356312	Acot7	protein_coding	MGI:1917275	-0.0732439	0.0340053	-2.15389	0.0312485	0.306953
ENSMUSG00000028946	ENSMUSG00000028946.8	chr4:152370429-152376119	Hes3	protein_coding	MGI:104877	-1.44886	0.479023	-3.02461	0.00248955
ENSMUSG00000028955	ENSMUSG00000028955.4	chr4:151131757-151142420	Vamp3	protein_coding	MGI:1321389	-0.0928715	0.0385546	-2.40883	0.0160036	0.22574
ENSMUSG00000028962	ENSMUSG00000028962.15	chr5:24628835-24645948	Slc4a2	protein_coding	MGI:109351	-0.160678	0.037069	-4.33457	1.46047e-05	0.00259226
ENSMUSG00000028978	ENSMUSG00000028978.13	chr5:24569808-24589472	Nos3	protein_coding	MGI:97362	-0.131374	0.0614476	-2.13799	0.0325179	0.312254
ENSMUSG00000028986	ENSMUSG00000028986.13	chr5:24305603-24365790	Klhl7	protein_coding	MGI:1196453	0.0827908	0.0335847	2.46514	0.0136961	0.207596
ENSMUSG00000028988	ENSMUSG00000028988.14	chr4:149602693-149650894	Ctnnbip1	protein_coding	MGI:1915756	-0.105043	0.0398857	-2.63361	0.00844825	0.164394
ENSMUSG00000029033	ENSMUSG00000029033.17	chr4:155976279-155991708	Acap3	protein_coding	MGI:2153589	0.0713049	0.0322048	2.21411	0.0268215	0.285445
ENSMUSG00000029086	ENSMUSG00000029086.16	chr5:44150962-44259374	Prom1	protein_coding	MGI:1100886	-0.143929	0.047478	-3.03148	0.00243359	0.0777614
ENSMUSG00000029093	ENSMUSG00000029093.15	chr5:36174524-36555483	Sorcs2	protein_coding	MGI:1932289	0.0934724	0.0346185	2.70007	0.00693251	0.149099
ENSMUSG00000029098	ENSMUSG00000029098.18	chr5:35740384-35772696	Acox3	protein_coding	MGI:1933156	-0.0835634	0.0416802	-2.00487	0.0449768	0.358628
ENSMUSG00000029151	ENSMUSG00000029151.15	chr5:31243450-31265581	Slc30a3	protein_coding	MGI:1345280	0.283357	0.0783028	3.61873	0.000296051	0.0188187
ENSMUSG00000029193	ENSMUSG00000029193.8	chr5:53855118-53865047	Cckar	protein_coding	MGI:99478	-0.591659	0.258202	-2.29146	0.0219367
ENSMUSG00000029202	ENSMUSG00000029202.13	chr5:65763064-65855616	Pds5a	protein_coding	MGI:1918771	0.085721	0.0339575	2.52436	0.0115909	0.190087
ENSMUSG00000029212	ENSMUSG00000029212.12	chr5:71815456-72306380	Gabrb1	protein_coding	MGI:95619	0.114519	0.0515256	2.22256	0.0262457	0.281389
ENSMUSG00000029238	ENSMUSG00000029238.12	chr5:76357715-76452639	Clock	protein_coding	MGI:99698	0.100637	0.0329175	3.05726	0.00223371	0.0737295
ENSMUSG00000029245	ENSMUSG00000029245.17	chr5:84202620-84565241	Epha5	protein_coding	MGI:99654	0.12026	0.036853	3.26323	0.00110152	0.0482331
ENSMUSG00000029311	ENSMUSG00000029311.17	chr5:104137628-104169785	Hsd17b11	protein_coding	MGI:2149821	-0.0753586	0.0379743	-1.98446	0.0472041	0.366426
ENSMUSG00000029335	ENSMUSG00000029335.6	chr5:99002274-99032255	Bmp3	protein_coding	MGI:88179	0.482831	0.172681	2.79608	0.0051726	0.122755
ENSMUSG00000029394	ENSMUSG00000029394.12	chr5:124483480-124501145	Cdk2ap1	protein_coding	MGI:1202069	-0.109788	0.0503425	-2.18082	0.0291969	0.299175
ENSMUSG00000029403	ENSMUSG00000029403.15	chr5:92153933-92191742	Cdkl2	protein_coding	MGI:1858227	0.0904336	0.0411934	2.19534	0.0281392	0.294417
ENSMUSG00000029405	ENSMUSG00000029405.17	chr5:92200005-92231578	G3bp2	protein_coding	MGI:2442040	0.0881286	0.0277338	3.17767	0.00148466	0.0585089
ENSMUSG00000029406	ENSMUSG00000029406.16	chr5:124256753-124387823	Pitpnm2	protein_coding	MGI:1336192	0.0936695	0.0443274	2.11313	0.0345899	0.32024
ENSMUSG00000029420	ENSMUSG00000029420.15	chr5:128834855-129030550	Rimbp2	protein_coding	MGI:2443235	0.126027	0.0381884	3.30015	0.000966347	0.0452063
ENSMUSG00000029426	ENSMUSG00000029426.9	chr5:92589173-92654692	Scarb2	protein_coding	MGI:1196458	-0.0701081	0.0283841	-2.46997	0.0135123	0.20663
ENSMUSG00000029434	ENSMUSG00000029434.13	chr5:123666722-123711101	Vps33a	protein_coding	MGI:1924823	0.0913424	0.035425	2.57848	0.00992371	0.177277
ENSMUSG00000029442	ENSMUSG00000029442.19	chr5:123390165-123465547	Wdr66	protein_coding	MGI:1918495	0.252449	0.110067	2.29359	0.021814	0.257152
ENSMUSG00000029502	ENSMUSG00000029502.15	chr5:110324567-110374336	Golga3	protein_coding	MGI:96958	0.0858666	0.0316923	2.70939	0.00674077	0.147334
ENSMUSG00000029554	ENSMUSG00000029554.16	chr5:139994444-140307307	Mad1l1	protein_coding	MGI:1341857	-0.163281	0.0449168	-3.6352	0.000277768	0.0184569
ENSMUSG00000029560	ENSMUSG00000029560.13	chr5:140326054-140375017	Snx8	protein_coding	MGI:2443816	-0.153188	0.0537157	-2.85183	0.00434682	0.110955
ENSMUSG00000029571	ENSMUSG00000029571.15	chr6:13069758-13089268	Tmem106b	protein_coding	MGI:1919150	0.0738662	0.0307698	2.40061	0.0163679	0.228887
ENSMUSG00000029596	ENSMUSG00000029596.14	chr5:120596251-120610875	Sdsl	protein_coding	MGI:2182607	-0.270864	0.112321	-2.41152	0.015886	0.22486
ENSMUSG00000029602	ENSMUSG00000029602.12	chr5:120786877-120817662	Rasal1	protein_coding	MGI:1330842	0.179165	0.0563495	3.17952	0.00147518	0.0583123
ENSMUSG00000029636	ENSMUSG00000029636.12	chr5:146321795-146410425	Wasf3	protein_coding	MGI:2658986	0.0680878	0.0325995	2.08862	0.0367423	0.328634
ENSMUSG00000029640	ENSMUSG00000029640.18	chr5:146671619-146731816	Usp12	protein_coding	MGI:1270128	0.0695464	0.0342025	2.03337	0.0420149	0.348694
ENSMUSG00000029648	ENSMUSG00000029648.14	chr5:147498414-147662821	Flt1	protein_coding	MGI:95558	-0.0965868	0.0383137	-2.52095	0.0117039	0.1905
ENSMUSG00000029669	ENSMUSG00000029669.15	chr6:21771394-21852514	Tspan12	protein_coding	MGI:1889818	-0.0993751	0.0429316	-2.31473	0.0206278	0.250247
ENSMUSG00000029674	ENSMUSG00000029674.14	chr5:134684893-134717452	Limk1	protein_coding	MGI:104572	-0.105269	0.0471378	-2.23321	0.0255352	0.277664
ENSMUSG00000029684	ENSMUSG00000029684.15	chr6:24613804-24665008	Wasl	protein_coding	MGI:1920428	0.0695535	0.0298755	2.32811	0.0199062	0.247113
ENSMUSG00000029723	ENSMUSG00000029723.17	chr5:137743992-137766712	Tsc22d4	protein_coding	MGI:1926079	-0.114162	0.0314011	-3.63559	0.000277343	0.0184569
ENSMUSG00000029763	ENSMUSG00000029763.18	chr6:33226020-33950914	Exoc4	protein_coding	MGI:1096376	0.0685777	0.031701	2.16327	0.0305206	0.303224
ENSMUSG00000029787	ENSMUSG00000029787.11	chr6:56691884-56738897	Avl9	protein_coding	MGI:1926187	0.0937378	0.034762	2.69656	0.00700597	0.149621
ENSMUSG00000029840	ENSMUSG00000029840.9	chr6:35485841-35516823	Mtpn	protein_coding	MGI:99445	0.0988525	0.0284466	3.47502	0.000510812	0.0287715
ENSMUSG00000029864	ENSMUSG00000029864.8	chr6:42222869-42227381	Gstk1	protein_coding	MGI:1923513	-0.133672	0.066661	-2.00524	0.044937	0.358628
ENSMUSG00000029869	ENSMUSG00000029869.8	chr6:41582416-41597443	Ephb6	protein_coding	MGI:1096338	0.0833409	0.0326573	2.55198	0.0107112	0.183289
ENSMUSG00000029875	ENSMUSG00000029875.6	chr15:98065039-98068015	Ccdc184	protein_coding	MGI:2146066	-0.114168	0.0558159	-2.04543	0.0408126	0.343316
ENSMUSG00000029878	ENSMUSG00000029878.7	chr12:74343442-74348782	Dbpht2	lncRNA	MGI:2679513	0.144811	0.046525	3.11253	0.0018549	0.0669785
ENSMUSG00000029994	ENSMUSG00000029994.18	chr6:86713822-86770566	Anxa4	protein_coding	MGI:88030	-0.235379	0.111025	-2.12006	0.0340013	0.319021
ENSMUSG00000030000	ENSMUSG00000030000.11	chr6:86005663-86101391	Add2	protein_coding	MGI:87919	0.106037	0.0353688	2.99803	0.00271729	0.0835421
ENSMUSG00000030035	ENSMUSG00000030035.15	chr6:83096025-83098540	Wbp1	protein_coding	MGI:104710	-0.0883718	0.0428631	-2.06172	0.039234	0.337141
ENSMUSG00000030077	ENSMUSG00000030077.12	chr6:103487547-103727172	Chl1	protein_coding	MGI:1098266	0.135513	0.056611	2.39376	0.0166765	0.230204
ENSMUSG00000030172	ENSMUSG00000030172.16	chr6:119547757-119825128	Erc1	protein_coding	MGI:2151013	0.168166	0.0458249	3.66975	0.000242787	0.0175398
ENSMUSG00000030189	ENSMUSG00000030189.16	chr6:131341818-131365439	Ybx3	protein_coding	MGI:2137670	-0.170981	0.0414099	-4.12899	3.64358e-05	0.00473847
ENSMUSG00000030206	ENSMUSG00000030206.14	chr6:135214324-135231349	Gsg1	protein_coding	MGI:1194499	1.0771	0.538087	2.00173	0.0453139
ENSMUSG00000030226	ENSMUSG00000030226.13	chr6:138339916-138558966	Lmo3	protein_coding	MGI:102810	0.101874	0.0364077	2.79815	0.00513963	0.122751
ENSMUSG00000030237	ENSMUSG00000030237.15	chr6:141751166-141801925	Slco1a4	protein_coding	MGI:1351896	-0.10833	0.0384532	-2.81718	0.00484475	0.118432
ENSMUSG00000030268	ENSMUSG00000030268.18	chr6:144939561-145021910	Bcat1	protein_coding	MGI:104861	-0.110124	0.0520208	-2.11692	0.0342668	0.319455
ENSMUSG00000030317	ENSMUSG00000030317.9	chr6:115218853-115229166	Timp4	protein_coding	MGI:109125	-0.13696	0.0518405	-2.64196	0.00824282	0.163661
ENSMUSG00000030337	ENSMUSG00000030337.17	chr6:125192514-125222927	Vamp1	protein_coding	MGI:1313276	-0.290187	0.129724	-2.23695	0.0252895	0.277248
ENSMUSG00000030342	ENSMUSG00000030342.9	chr6:125437229-125471754	Cd9	protein_coding	MGI:88348	-0.137169	0.0337254	-4.06723	4.75755e-05	0.00572888
ENSMUSG00000030351	ENSMUSG00000030351.6	chr6:127864552-127930940	Tspan11	protein_coding	MGI:1915748	-0.436816	0.200115	-2.18283	0.0290485
ENSMUSG00000030352	ENSMUSG00000030352.16	chr6:127938359-128120557	Tspan9	protein_coding	MGI:1924558	-0.120152	0.0368321	-3.26216	0.00110565	0.0482517
ENSMUSG00000030376	ENSMUSG00000030376.9	chr7:15863751-15894988	Slc8a2	protein_coding	MGI:107996	0.0787719	0.0320532	2.45753	0.0139895	0.209383
ENSMUSG00000030386	ENSMUSG00000030386.20	chr7:12212220-12230162	Zfp606	protein_coding	MGI:1914620	-0.108789	0.053535	-2.03211	0.0421424	0.349005
ENSMUSG00000030421	ENSMUSG00000030421.10	chr7:37659417-37722976	Uri1	protein_coding	MGI:1342294	0.0959839	0.0352026	2.72661	0.00639882	0.142494
ENSMUSG00000030432	ENSMUSG00000030432.13	chr7:4795873-4798065	Rpl28	protein_coding	MGI:101839	-0.0954115	0.0274836	-3.47158	0.000517397	0.0290032
ENSMUSG00000030495	ENSMUSG00000030495.13	chr7:34885810-34900539	Slc7a10	protein_coding	MGI:1858261	-0.122353	0.0486871	-2.51304	0.0119695	0.193131
ENSMUSG00000030513	ENSMUSG00000030513.15	chr7:65511482-65700134	Pcsk6	protein_coding	MGI:102897	-0.0938781	0.0414947	-2.26241	0.023672	0.268868
ENSMUSG00000030522	ENSMUSG00000030522.15	chr7:63937401-63990554	Mtmr10	protein_coding	MGI:2142292	-0.0916078	0.0423459	-2.16332	0.0305165	0.303224
ENSMUSG00000030557	ENSMUSG00000030557.18	chr7:66880911-67022606	Mef2a	protein_coding	MGI:99532	0.0737102	0.0362006	2.03616	0.0417343	0.347866
ENSMUSG00000030616	ENSMUSG00000030616.17	chr7:89951460-90059927	Sytl2	protein_coding	MGI:1933366	-0.169521	0.0416128	-4.07376	4.62594e-05	0.00562246
ENSMUSG00000030630	ENSMUSG00000030630.17	chr7:84234367-84255930	Fah	protein_coding	MGI:95482	-0.187898	0.0499022	-3.76532	0.000166336	0.0140468
ENSMUSG00000030643	ENSMUSG00000030643.15	chr7:92390811-92493743	Rab30	protein_coding	MGI:1923235	0.0807535	0.0391021	2.0652	0.0389043	0.337141
ENSMUSG00000030657	ENSMUSG00000030657.12	chr7:116980214-117272803	Xylt1	protein_coding	MGI:2451073	0.11912	0.0460537	2.58656	0.00969404	0.175611
ENSMUSG00000030672	ENSMUSG00000030672.13	chr7:126808062-126813470	Mylpf	protein_coding	MGI:97273	-0.417076	0.205578	-2.0288	0.0424789
ENSMUSG00000030681	ENSMUSG00000030681.19	chr7:126586032-126613793	Mvp	protein_coding	MGI:1925638	-0.155472	0.0694833	-2.23754	0.0252508	0.277248
ENSMUSG00000030701	ENSMUSG00000030701.18	chr7:100292099-100311621	Plekhb1	protein_coding	MGI:1351469	-0.207702	0.0366038	-5.67433	1.39229e-08	1.81068e-05
ENSMUSG00000030718	ENSMUSG00000030718.10	chr7:99975944-100021514	Ppme1	protein_coding	MGI:1919840	0.0591742	0.0298184	1.98449	0.0472016	0.366426
ENSMUSG00000030729	ENSMUSG00000030729.18	chr7:99876601-99928075	Pgm2l1	protein_coding	MGI:1918224	0.179683	0.0502636	3.57482	0.000350475	0.0213987
ENSMUSG00000030739	ENSMUSG00000030739.19	chr7:44255227-44320267	Myh14	protein_coding	MGI:1919210	-0.120204	0.0400147	-3.00399	0.00266464	0.0823126
ENSMUSG00000030759	ENSMUSG00000030759.17	chr7:113113041-113170718	Far1	protein_coding	MGI:1914670	0.0756854	0.035659	2.12247	0.0337979	0.318812
ENSMUSG00000030770	ENSMUSG00000030770.16	chr7:112026712-112190899	Parva	protein_coding	MGI:1931144	-0.133333	0.0439425	-3.03426	0.00241124	0.0774277
ENSMUSG00000030805	ENSMUSG00000030805.15	chr7:127423466-127448191	Stx4a	protein_coding	MGI:893577	-0.0768992	0.0341875	-2.24934	0.0244909	0.274256
ENSMUSG00000030830	ENSMUSG00000030830.19	chr7:126895432-126934310	Itgal	protein_coding	MGI:96606	0.449097	0.220726	2.03463	0.0418879
ENSMUSG00000030849	ENSMUSG00000030849.19	chr7:129764181-132725079	Fgfr2	protein_coding	MGI:95523	-0.197426	0.0456246	-4.32718	1.51034e-05	0.00261893
ENSMUSG00000030878	ENSMUSG00000030878.12	chr7:120556259-120581535	Cdr2	protein_coding	MGI:1100885	-0.159093	0.0437692	-3.63483	0.000278166	0.0184569
ENSMUSG00000030898	ENSMUSG00000030898.16	chr7:105074938-105120105	Cckbr	protein_coding	MGI:99479	0.211042	0.0622992	3.38756	0.000705166	0.0363916
ENSMUSG00000030905	ENSMUSG00000030905.6	chr7:119785603-119801334	Crym	protein_coding	MGI:102675	0.207	0.0520671	3.97564	7.01913e-05	0.00754411
ENSMUSG00000030956	ENSMUSG00000030956.16	chr7:132313811-132415615	Fam53b	protein_coding	MGI:1925188	-0.10227	0.0490042	-2.08696	0.0368914	0.328837
ENSMUSG00000030986	ENSMUSG00000030986.14	chr7:133322671-133384455	Dhx32	protein_coding	MGI:2141813	0.0910034	0.0390048	2.33313	0.0196413	0.245233
ENSMUSG00000030987	ENSMUSG00000030987.6	chr7:101917013-102086526	Stim1	protein_coding	MGI:107476	0.0695933	0.0313054	2.22305	0.0262127	0.281389
ENSMUSG00000030994	ENSMUSG00000030994.17	chr7:133867508-134102889	D7Ertd443e	protein_coding	MGI:1196431	-0.13878	0.0578372	-2.39949	0.0164179	0.229093
ENSMUSG00000031024	ENSMUSG00000031024.14	chr7:109123118-109302812	Denn2b	protein_coding	MGI:108517	-0.0968002	0.0480635	-2.01401	0.0440089	0.355047
ENSMUSG00000031026	ENSMUSG00000031026.16	chr7:109048213-109107341	Trim66	protein_coding	MGI:2152406	0.121349	0.0527986	2.29833	0.0215429	0.255393
ENSMUSG00000031028	ENSMUSG00000031028.15	chr7:108549545-108633667	Tub	protein_coding	MGI:2651573	0.0916135	0.0435577	2.10327	0.0354426	0.324527
ENSMUSG00000031095	ENSMUSG00000031095.16	chrX:37622151-37665073	Cul4b	protein_coding	MGI:1919834	0.0872553	0.0426173	2.04742	0.0406172	0.343159
ENSMUSG00000031099	ENSMUSG00000031099.17	chrX:46898245-46981851	Smarca1	protein_coding	MGI:1935127	0.101884	0.039334	2.59022	0.0095916	0.174704
ENSMUSG00000031111	ENSMUSG00000031111.17	chrX:48871413-48886626	Igsf1	protein_coding	MGI:2147913	-0.430316	0.200488	-2.14635	0.0318453	0.309991
ENSMUSG00000031145	ENSMUSG00000031145.16	chrX:7523499-7534425	Prickle3	protein_coding	MGI:1859635	-0.382449	0.193515	-1.97633	0.0481177
ENSMUSG00000031155	ENSMUSG00000031155.18	chrX:7744501-7749671	Pim2	protein_coding	MGI:97587	0.104136	0.044427	2.34398	0.0190793	0.241277
ENSMUSG00000031168	ENSMUSG00000031168.15	chrX:8051568-8059751	Ebp	protein_coding	MGI:107822	-0.122294	0.058179	-2.10203	0.0355505	0.324642
ENSMUSG00000031232	ENSMUSG00000031232.18	chrX:105011690-105055512	Magt1	protein_coding	MGI:1914325	-0.123444	0.0445072	-2.77357	0.0055445	0.127848
ENSMUSG00000031242	ENSMUSG00000031242.8	chrX:106826357-106859940	2610002M06Rik	protein_coding	MGI:1914278	0.121529	0.0363933	3.33933	0.000839805	0.040601
ENSMUSG00000031278	ENSMUSG00000031278.13	chrX:141100989-141173531	Acsl4	protein_coding	MGI:1354713	0.0834912	0.0403956	2.06684	0.0387496	0.337141
ENSMUSG00000031284	ENSMUSG00000031284.17	chrX:142301587-142580792	Pak3	protein_coding	MGI:1339656	0.103572	0.0384247	2.69544	0.00702948	0.149621
ENSMUSG00000031311	ENSMUSG00000031311.18	chrX:100472924-100492197	Nono	protein_coding	MGI:1855692	0.0611216	0.0297307	2.05584	0.0397979	0.339614
ENSMUSG00000031347	ENSMUSG00000031347.13	chrX:71957138-71962017	Cetn2	protein_coding	MGI:1347085	0.113123	0.0432476	2.6157	0.00890445	0.168996
ENSMUSG00000031355	ENSMUSG00000031355.17	chrX:167578095-168087431	Arhgap6	protein_coding	MGI:1196332	0.213069	0.0807507	2.6386	0.00832496	0.164394
ENSMUSG00000031360	ENSMUSG00000031360.15	chrX:161684234-161815504	Ctps2	protein_coding	MGI:1933185	-0.0938251	0.0478633	-1.96027	0.049964	0.376489
ENSMUSG00000031385	ENSMUSG00000031385.15	chrX:72800696-72816120	Plxnb3	protein_coding	MGI:2154240	-0.17985	0.0590538	-3.04552	0.00232276	0.0755186
ENSMUSG00000031425	ENSMUSG00000031425.16	chrX:135723420-135740482	Plp1	protein_coding	MGI:97623	-0.219246	0.041017	-5.34525	9.02914e-08	7.339e-05
ENSMUSG00000031432	ENSMUSG00000031432.4	chrX:139357362-139376889	Prps1	protein_coding	MGI:97775	0.0946512	0.0338126	2.79929	0.00512154	0.122751
ENSMUSG00000031447	ENSMUSG00000031447.8	chr8:13209161-13225338	Lamp1	protein_coding	MGI:96745	-0.0937529	0.0256722	-3.65192	0.000260287	0.0181355
ENSMUSG00000031465	ENSMUSG00000031465.7	chr8:18740279-18791578	Angpt2	protein_coding	MGI:1202890	-0.470373	0.167397	-2.80993	0.0049552
ENSMUSG00000031511	ENSMUSG00000031511.17	chr8:11777721-11885219	Arhgef7	protein_coding	MGI:1860493	0.0611017	0.0297196	2.05594	0.0397883	0.339614
ENSMUSG00000031517	ENSMUSG00000031517.9	chr8:55407878-55513906	Gpm6a	protein_coding	MGI:107671	0.0643808	0.0273289	2.35578	0.0184841	0.238046
ENSMUSG00000031520	ENSMUSG00000031520.7	chr8:54530641-54640131	Vegfc	protein_coding	MGI:109124	-0.282337	0.143275	-1.97059	0.0487708
ENSMUSG00000031586	ENSMUSG00000031586.18	chr8:34272671-34419891	Rbpms	protein_coding	MGI:1334446	-0.224485	0.0953765	-2.35368	0.0185889	0.238489
ENSMUSG00000031626	ENSMUSG00000031626.19	chr8:45960825-46280943	Sorbs2	protein_coding	MGI:1924574	0.124014	0.035824	3.46175	0.000536671	0.0296996
ENSMUSG00000031661	ENSMUSG00000031661.13	chr8:89247982-89321512	Nkd1	protein_coding	MGI:2135954	-0.15915	0.0550535	-2.89082	0.00384239	0.104667
ENSMUSG00000031665	ENSMUSG00000031665.8	chr8:89753863-89770790	Sall1	protein_coding	MGI:1889585	-0.102998	0.0464886	-2.21557	0.0267213	0.284833
ENSMUSG00000031696	ENSMUSG00000031696.10	chr8:85987021-86026431	Vps35	protein_coding	MGI:1890467	0.0632826	0.0289122	2.18878	0.0286127	0.297448
ENSMUSG00000031708	ENSMUSG00000031708.18	chr8:84298327-84334600	Tecr	protein_coding	MGI:1915408	-0.0725661	0.0322865	-2.24757	0.0246039	0.274891
ENSMUSG00000031714	ENSMUSG00000031714.10	chr8:81491067-81607148	Gab1	protein_coding	MGI:108088	-0.171828	0.0477609	-3.59766	0.000321087	0.0200757
ENSMUSG00000031750	ENSMUSG00000031750.16	chr8:111468461-111532556	Il34	protein_coding	MGI:1923777	0.0946303	0.0363706	2.60184	0.00927259	0.172026
ENSMUSG00000031762	ENSMUSG00000031762.8	chr8:94899292-94900196	Mt2	protein_coding	MGI:97172	-0.11352	0.0514802	-2.20512	0.0274455	0.290098
ENSMUSG00000031775	ENSMUSG00000031775.6	chr8:95401522-95422906	Pllp	protein_coding	MGI:1915051	-0.249175	0.0421843	-5.90683	3.4875e-09	1.38377e-05
ENSMUSG00000031790	ENSMUSG00000031790.9	chr8:96078896-96101708	Mmp15	protein_coding	MGI:109320	-0.0966143	0.0427191	-2.26162	0.0237209	0.268954
ENSMUSG00000031799	ENSMUSG00000031799.11	chr8:72884018-72906986	Tpm4	protein_coding	MGI:2449202	-0.0924614	0.0406966	-2.27197	0.0230884	0.265017
ENSMUSG00000031870	ENSMUSG00000031870.17	chr9:8899834-8968612	Pgr	protein_coding	MGI:97567	0.192918	0.0482624	3.99728	6.4074e-05	0.00728369
ENSMUSG00000031897	ENSMUSG00000031897.10	chr8:106662367-106665076	Psmb10	protein_coding	MGI:1096380	-0.126373	0.05397	-2.34154	0.0192045	0.241956
ENSMUSG00000031971	ENSMUSG00000031971.16	chr8:124567570-124586948	Ccsap	protein_coding	MGI:1920670	0.0946348	0.0425307	2.22509	0.026075	0.281389
ENSMUSG00000031980	ENSMUSG00000031980.11	chr8:125283273-125296445	Agt	protein_coding	MGI:87963	-0.622786	0.265722	-2.34376	0.0190907	0.241277
ENSMUSG00000031983	ENSMUSG00000031983.8	chr8:125362495-125390108	2310022B05Rik	protein_coding	MGI:1916801	-0.201364	0.0441475	-4.56117	5.08693e-06	0.00116062
ENSMUSG00000031990	ENSMUSG00000031990.16	chr9:27008680-27066717	Jam3	protein_coding	MGI:1933825	-0.0970329	0.0478791	-2.02662	0.0427008	0.351693
ENSMUSG00000031993	ENSMUSG00000031993.8	chr9:30338404-30378029	Snx19	protein_coding	MGI:1921581	0.0708905	0.033814	2.09648	0.0360392	0.325745
ENSMUSG00000032012	ENSMUSG00000032012.10	chr9:43655281-43743955	Nectin1	protein_coding	MGI:1926483	-0.109716	0.0428945	-2.55782	0.0105331	0.182034
ENSMUSG00000032030	ENSMUSG00000032030.17	chr9:53525882-53581314	Cul5	protein_coding	MGI:1922967	0.0864548	0.0328115	2.6349	0.00841632	0.164394
ENSMUSG00000032060	ENSMUSG00000032060.11	chr9:50662625-50667936	Cryab	protein_coding	MGI:88516	-0.253543	0.0811848	-3.12304	0.00178992	0.0659432
ENSMUSG00000032114	ENSMUSG00000032114.10	chr9:44308149-44314265	Slc37a4	protein_coding	MGI:1316650	-0.0953359	0.0481591	-1.9796	0.0477483	0.367871
ENSMUSG00000032120	ENSMUSG00000032120.12	chr9:44220534-44231582	C2cd2l	protein_coding	MGI:1919014	0.0795545	0.034287	2.32025	0.0203271	0.249446
ENSMUSG00000032135	ENSMUSG00000032135.16	chr9:44045766-44054024	Mcam	protein_coding	MGI:1933966	-0.149094	0.0479942	-3.1065	0.00189316	0.0678183
ENSMUSG00000032174	ENSMUSG00000032174.6	chr9:20943369-20950332	Icam5	protein_coding	MGI:109430	0.11597	0.0357331	3.24545	0.00117267	0.0503317
ENSMUSG00000032186	ENSMUSG00000032186.16	chr9:75472903-75518607	Tmod2	protein_coding	MGI:1355335	0.0798319	0.0398492	2.00335	0.0451396	0.359046
ENSMUSG00000032216	ENSMUSG00000032216.16	chr9:72569628-72657134	Nedd4	protein_coding	MGI:97297	0.0751302	0.0263085	2.85574	0.00429373	0.11078
ENSMUSG00000032224	ENSMUSG00000032224.16	chr9:69995793-70049842	Fam81a	protein_coding	MGI:1924136	0.115006	0.0401029	2.86777	0.00413379	0.109756
ENSMUSG00000032244	ENSMUSG00000032244.10	chr9:62699103-62719216	Fem1b	protein_coding	MGI:1335087	0.0771434	0.0342581	2.25183	0.0243331	0.273511
ENSMUSG00000032252	ENSMUSG00000032252.15	chr9:61964530-62029937	Glce	protein_coding	MGI:2136405	0.0983822	0.0367738	2.67534	0.00746545	0.155093
ENSMUSG00000032268	ENSMUSG00000032268.14	chr9:48992560-49028887	Tmprss5	protein_coding	MGI:1933407	-0.276985	0.129727	-2.13515	0.032749
ENSMUSG00000032293	ENSMUSG00000032293.9	chr9:54771073-54819814	Ireb2	protein_coding	MGI:1928268	0.082587	0.0354425	2.33017	0.0197972	0.24614
ENSMUSG00000032320	ENSMUSG00000032320.8	chr9:55949129-55969166	Rcn2	protein_coding	MGI:1349765	-0.0777248	0.0334453	-2.32393	0.020129	0.248566
ENSMUSG00000032327	ENSMUSG00000032327.15	chr9:57971071-58061279	Stra6	protein_coding	MGI:107742	0.288748	0.0940856	3.06899	0.00214784	0.0721775
ENSMUSG00000032328	ENSMUSG00000032328.13	chr9:79676225-79700789	Tmem30a	protein_coding	MGI:106402	0.0639818	0.0323755	1.97624	0.0481275	0.368826
ENSMUSG00000032343	ENSMUSG00000032343.16	chr9:80220612-80347534	Impg1	protein_coding	MGI:1926876	-0.213405	0.100719	-2.11882	0.0341056	0.319095
ENSMUSG00000032349	ENSMUSG00000032349.14	chr9:77824646-77891801	Elovl5	protein_coding	MGI:1916051	-0.100365	0.0356922	-2.81195	0.00492422	0.120149
ENSMUSG00000032356	ENSMUSG00000032356.13	chr9:89791961-89909030	Rasgrf1	protein_coding	MGI:99694	0.114161	0.0352468	3.23891	0.00119986	0.0511612
ENSMUSG00000032376	ENSMUSG00000032376.13	chr9:66421919-66500424	Usp3	protein_coding	MGI:2152450	0.0986442	0.0435672	2.26419	0.0235627	0.268565
ENSMUSG00000032393	ENSMUSG00000032393.16	chr9:64939696-64989933	Dpp8	protein_coding	MGI:1921638	0.0712874	0.0332361	2.14488	0.0319628	0.31067
ENSMUSG00000032412	ENSMUSG00000032412.9	chr9:96214708-96246495	Atp1b3	protein_coding	MGI:107788	-0.144894	0.0309069	-4.68808	2.75777e-06	0.000853923
ENSMUSG00000032425	ENSMUSG00000032425.16	chr9:88430073-88453114	Zfp949	protein_coding	MGI:1918890	0.100245	0.046892	2.13779	0.0325339	0.312254
ENSMUSG00000032468	ENSMUSG00000032468.12	chr9:99360425-99450952	Armc8	protein_coding	MGI:1921375	0.0675455	0.0315405	2.14155	0.0322299	0.311534
ENSMUSG00000032479	ENSMUSG00000032479.16	chr9:109760528-109913023	Map4	protein_coding	MGI:97178	-0.0710936	0.0250789	-2.8348	0.00458548	0.115124
ENSMUSG00000032481	ENSMUSG00000032481.18	chr9:109946776-110069246	Smarcc1	protein_coding	MGI:1203524	0.0723266	0.0303601	2.38229	0.0172053	0.232594
ENSMUSG00000032492	ENSMUSG00000032492.15	chr9:110551153-110576213	Pth1r	protein_coding	MGI:97801	-0.229305	0.0909918	-2.52006	0.0117335	0.190504
ENSMUSG00000032494	ENSMUSG00000032494.13	chr9:110768671-110775226	Tdgf1	protein_coding	MGI:98658	-0.485317	0.214997	-2.25732	0.023988
ENSMUSG00000032495	ENSMUSG00000032495.9	chr9:110780613-110813134	Lrrc2	protein_coding	MGI:1921499	-0.281061	0.116845	-2.40542	0.0161538
ENSMUSG00000032500	ENSMUSG00000032500.11	chr9:111268149-111318186	Dclk3	protein_coding	MGI:3039580	0.106384	0.043291	2.45742	0.0139937	0.209383
ENSMUSG00000032503	ENSMUSG00000032503.19	chr9:111894159-112065006	Arpp21	protein_coding	MGI:107562	0.0854161	0.0345932	2.46916	0.0135433	0.206725
ENSMUSG00000032511	ENSMUSG00000032511.18	chr9:119312474-119408082	Scn5a	protein_coding	MGI:98251	0.217879	0.0915019	2.38114	0.017259	0.232823
ENSMUSG00000032512	ENSMUSG00000032512.8	chr9:119723944-119755653	Wdr48	protein_coding	MGI:1914811	0.0719331	0.0339606	2.11813	0.0341637	0.319236
ENSMUSG00000032517	ENSMUSG00000032517.17	chr9:119978773-120010550	Mobp	protein_coding	MGI:108511	-0.176476	0.0423099	-4.17104	3.0321e-05	0.00418613
ENSMUSG00000032518	ENSMUSG00000032518.7	chr9:119956755-119961435	Rpsa	protein_coding	MGI:105381	-0.051012	0.0259523	-1.96561	0.0493437	0.372873
ENSMUSG00000032523	ENSMUSG00000032523.12	chr9:121613082-121621573	Hhatl	protein_coding	MGI:1922020	-0.17102	0.0668958	-2.55652	0.0105726	0.182034
ENSMUSG00000032540	ENSMUSG00000032540.17	chr9:122180673-122210589	Abhd5	protein_coding	MGI:1914719	-0.122565	0.0424388	-2.88805	0.00387644	0.105247
ENSMUSG00000032554	ENSMUSG00000032554.16	chr9:103081200-103107643	Trf	protein_coding	MGI:98821	-0.246906	0.0460031	-5.36715	7.99885e-08	6.935e-05
ENSMUSG00000032562	ENSMUSG00000032562.14	chr9:107491324-107512566	Gnai2	protein_coding	MGI:95772	-0.0593434	0.0271315	-2.18725	0.0287242	0.298132
ENSMUSG00000032564	ENSMUSG00000032564.17	chr9:104424485-104911743	Cpne4	protein_coding	MGI:1921270	0.286094	0.113819	2.51359	0.0119508	0.193068
ENSMUSG00000032648	ENSMUSG00000032648.15	chr19:6434429-6448489	Pygm	protein_coding	MGI:97830	-0.138026	0.052702	-2.61899	0.00881902	0.168509
ENSMUSG00000032666	ENSMUSG00000032666.17	chr1:151728154-151965876	1700025G04Rik	protein_coding	MGI:1916649	0.0879019	0.0364953	2.40858	0.0160147	0.22574
ENSMUSG00000032667	ENSMUSG00000032667.18	chr6:5264147-5298455	Pon2	protein_coding	MGI:106687	-0.0893209	0.0415889	-2.14771	0.0317369	0.309613
ENSMUSG00000032673	ENSMUSG00000032673.6	chr11:29461757-29465033	Prorsd1	protein_coding	MGI:1915189	-0.252575	0.113812	-2.21922	0.026472	0.282883
ENSMUSG00000032733	ENSMUSG00000032733.7	chr9:56824477-56835655	Snx33	protein_coding	MGI:2443239	-0.158007	0.055816	-2.83086	0.00464233	0.115437
ENSMUSG00000032763	ENSMUSG00000032763.12	chr10:78410180-78420336	Ilvbl	protein_coding	MGI:1351911	-0.100056	0.0430621	-2.32353	0.0201508	0.248566
ENSMUSG00000032766	ENSMUSG00000032766.10	chr6:4003904-4008445	Gng11	protein_coding	MGI:1913316	-0.316578	0.0706354	-4.48187	7.39926e-06	0.00152742
ENSMUSG00000032773	ENSMUSG00000032773.10	chr19:8641153-8660951	Chrm1	protein_coding	MGI:88396	0.0742362	0.0348776	2.12848	0.0332975	0.316113
ENSMUSG00000032812	ENSMUSG00000032812.19	chr7:100997274-101061793	Arap1	protein_coding	MGI:1916960	-0.103819	0.0429497	-2.41722	0.0156398	0.223312
ENSMUSG00000032827	ENSMUSG00000032827.16	chr6:4902917-5165661	Ppp1r9a	protein_coding	MGI:2442401	0.102676	0.0443179	2.31681	0.0205142	0.250036
ENSMUSG00000032841	ENSMUSG00000032841.16	chr2:101544630-101713372	Prr5l	protein_coding	MGI:1919696	-0.241907	0.0525872	-4.60011	4.22261e-06	0.0010983
ENSMUSG00000032850	ENSMUSG00000032850.17	chr5:118328801-118383181	Rnft2	protein_coding	MGI:2442859	0.0681393	0.0288923	2.35839	0.0183543	0.238046
ENSMUSG00000032854	ENSMUSG00000032854.13	chr3:125658920-125732268	Ugt8a	protein_coding	MGI:109522	-0.18092	0.0498982	-3.62579	0.000288079	0.0187323
ENSMUSG00000032892	ENSMUSG00000032892.15	chr11:68863310-68866011	Rangrf	protein_coding	MGI:1889073	-0.147838	0.0693947	-2.1304	0.0331389	0.315993
ENSMUSG00000032902	ENSMUSG00000032902.2	chr3:104545984-104565778	Slc16a1	protein_coding	MGI:106013	-0.150285	0.0503048	-2.9875	0.00281273	0.0860695
ENSMUSG00000032936	ENSMUSG00000032936.14	chr9:107812873-107826890	Camkv	protein_coding	MGI:2384296	0.0788561	0.0267008	2.95333	0.00314368	0.0910351
ENSMUSG00000032965	ENSMUSG00000032965.12	chr16:49519596-49585489	Ift57	protein_coding	MGI:1921166	0.0892289	0.0354736	2.51536	0.011891	0.192342
ENSMUSG00000032998	ENSMUSG00000032998.17	chr4:119394201-119486316	Foxj3	protein_coding	MGI:2443432	0.0779832	0.0365894	2.13131	0.033064	0.315942
ENSMUSG00000033006	ENSMUSG00000033006.11	chr15:79039108-79049440	Sox10	protein_coding	MGI:98358	-0.178066	0.0452746	-3.93301	8.38879e-05	0.0083409
ENSMUSG00000033009	ENSMUSG00000033009.16	chr8:94763826-94794549	Ogfod1	protein_coding	MGI:2442978	0.0794945	0.0317525	2.50356	0.012295	0.196009
ENSMUSG00000033032	ENSMUSG00000033032.16	chr18:61863332-61919773	Afap1l1	protein_coding	MGI:2147199	-0.120821	0.0476241	-2.53696	0.0111819	0.186915
ENSMUSG00000033039	ENSMUSG00000033039.11	chr15:78993098-79021100	Micall1	protein_coding	MGI:105870	-0.105382	0.036989	-2.84902	0.00438542	0.111168
ENSMUSG00000033060	ENSMUSG00000033060.17	chr14:101967393-102172146	Lmo7	protein_coding	MGI:1353586	0.107788	0.0377074	2.85854	0.0042559	0.110696
ENSMUSG00000033066	ENSMUSG00000033066.18	chr11:67345917-67575800	Gas7	protein_coding	MGI:1202388	0.162118	0.0408234	3.97121	7.15099e-05	0.00762283
ENSMUSG00000033182	ENSMUSG00000033182.13	chr6:88522096-88614932	Kbtbd12	protein_coding	MGI:1918481	0.506268	0.249259	2.03109	0.0422458
ENSMUSG00000033208	ENSMUSG00000033208.8	chr10:76089687-76096993	S100b	protein_coding	MGI:98217	-0.21827	0.0382792	-5.70206	1.18372e-08	1.71047e-05
ENSMUSG00000033216	ENSMUSG00000033216.10	chr6:88234316-88423521	Eefsec	protein_coding	MGI:2137092	0.153726	0.0511469	3.00558	0.00265074	0.0820782
ENSMUSG00000033411	ENSMUSG00000033411.17	chr2:121786482-121844123	Ctdspl2	protein_coding	MGI:1196405	0.124621	0.0485286	2.56799	0.0102289	0.179523
ENSMUSG00000033419	ENSMUSG00000033419.17	chr9:86647976-86762707	Snap91	protein_coding	MGI:109132	0.0723735	0.0298855	2.42169	0.0154484	0.221997
ENSMUSG00000033486	ENSMUSG00000033486.15	chr2:121223112-121244273	Catsper2	protein_coding	MGI:2387404	-0.209037	0.0959112	-2.17949	0.0292954	0.299175
ENSMUSG00000033491	ENSMUSG00000033491.14	chr9:86625702-86640496	Prss35	protein_coding	MGI:2444800	0.330271	0.131747	2.50686	0.0121807	0.195087
ENSMUSG00000033530	ENSMUSG00000033530.9	chr12:100267029-100487085	Ttc7b	protein_coding	MGI:2144724	0.0619518	0.0309891	1.99915	0.045592	0.361319
ENSMUSG00000033565	ENSMUSG00000033565.19	chr15:76963190-77191204	Rbfox2	protein_coding	MGI:1933973	0.0743371	0.0359219	2.06941	0.0385078	0.336329
ENSMUSG00000033579	ENSMUSG00000033579.17	chr8:112071767-112120456	Fa2h	protein_coding	MGI:2443327	-0.202147	0.0501331	-4.03221	5.52538e-05	0.00647365
ENSMUSG00000033595	ENSMUSG00000033595.8	chr14:70768125-70775764	Lgi3	protein_coding	MGI:2182619	-0.164446	0.0315759	-5.20796	1.9093e-07	0.00011824
ENSMUSG00000033615	ENSMUSG00000033615.10	chr5:108666420-108697890	Cplx1	protein_coding	MGI:104727	-0.130618	0.0415518	-3.14348	0.00166949	0.0631156
ENSMUSG00000033684	ENSMUSG00000033684.15	chr1:155651775-155688635	Qsox1	protein_coding	MGI:1330818	-0.113056	0.0480791	-2.35147	0.0186994	0.2393
ENSMUSG00000033705	ENSMUSG00000033705.18	chr2:120459602-120562376	Stard9	protein_coding	MGI:3045258	-0.132509	0.0637993	-2.07697	0.0378045	0.332869
ENSMUSG00000033713	ENSMUSG00000033713.13	chr12:99156337-99529841	Foxn3	protein_coding	MGI:1918625	-0.132581	0.0464422	-2.85476	0.00430695	0.11078
ENSMUSG00000033740	ENSMUSG00000033740.18	chr1:6557455-6931164	St18	protein_coding	MGI:2446700	-0.133566	0.0549127	-2.43234	0.0150017	0.217499
ENSMUSG00000033799	ENSMUSG00000033799.11	chr13:3616035-3661108	Tasor2	protein_coding	MGI:2145274	0.0969319	0.0444698	2.17973	0.0292778	0.299175
ENSMUSG00000033849	ENSMUSG00000033849.4	chr1:143516402-143530352	B3galt2	protein_coding	MGI:1349461	0.209181	0.0625702	3.34315	0.000828342	0.0401962
ENSMUSG00000033900	ENSMUSG00000033900.14	chr3:82265351-82302575	Map9	protein_coding	MGI:2442208	0.105312	0.0322477	3.26574	0.0010918	0.0481593
ENSMUSG00000033902	ENSMUSG00000033902.13	chr2:119803180-119857889	Mapkbp1	protein_coding	MGI:1347004	0.101432	0.0422986	2.398	0.0164848	0.229289
ENSMUSG00000033904	ENSMUSG00000033904.17	chr7:118311775-118336247	Ccp110	protein_coding	MGI:2141942	-0.103007	0.0365258	-2.82012	0.00480059	0.118018
ENSMUSG00000033949	ENSMUSG00000033949.13	chr18:46298367-46345674	Trim36	protein_coding	MGI:106264	-0.204842	0.0684567	-2.99229	0.00276892	0.0849288
ENSMUSG00000033953	ENSMUSG00000033953.11	chr11:17109263-17150375	Ppp3r1	protein_coding	MGI:107172	0.0641855	0.0289006	2.2209	0.0263575	0.281891
ENSMUSG00000033965	ENSMUSG00000033965.11	chrX:102741020-102865589	Slc16a2	protein_coding	MGI:1203732	0.092079	0.0466439	1.97408	0.0483722	0.36983
ENSMUSG00000034000	ENSMUSG00000034000.16	chr1:93948173-93956056	Neu4	protein_coding	MGI:2661364	-0.128424	0.0594107	-2.16163	0.0306464	0.303546
ENSMUSG00000034021	ENSMUSG00000034021.16	chr5:150597204-150734155	Pds5b	protein_coding	MGI:2140945	0.0847996	0.0396596	2.13818	0.0325018	0.312254
ENSMUSG00000034111	ENSMUSG00000034111.7	chr12:87213011-87247228	Tmed8	protein_coding	MGI:1923480	0.0751052	0.0352596	2.13006	0.0331665	0.315993
ENSMUSG00000034145	ENSMUSG00000034145.15	chr12:87068114-87136817	Tmem63c	protein_coding	MGI:2444386	0.105787	0.0429817	2.4612	0.0138473	0.209157
ENSMUSG00000034187	ENSMUSG00000034187.19	chr11:103712608-103844882	Nsf	protein_coding	MGI:104560	0.0862385	0.0281291	3.06581	0.00217081	0.0725742
ENSMUSG00000034209	ENSMUSG00000034209.5	chr11:5008128-5010385	Rasl10a	protein_coding	MGI:1922918	0.180798	0.0572649	3.15722	0.00159283	0.061651
ENSMUSG00000034310	ENSMUSG00000034310.9	chr5:127858694-128510141	Tmem132d	protein_coding	MGI:3044963	0.109339	0.0485878	2.25034	0.0244273	0.27386
ENSMUSG00000034317	ENSMUSG00000034317.15	chr3:68942621-68952088	Trim59	protein_coding	MGI:1914199	-0.203156	0.0568085	-3.57615	0.000348686	0.0213987
ENSMUSG00000034327	ENSMUSG00000034327.18	chr14:67953386-67979759	Kctd9	protein_coding	MGI:2145579	-0.156738	0.0740988	-2.11525	0.0344087	0.320053
ENSMUSG00000034402	ENSMUSG00000034402.4	chr12:74943994-75224106	Kcnh5	protein_coding	MGI:3584508	0.237387	0.0745878	3.18266	0.0014593	0.0580372
ENSMUSG00000034488	ENSMUSG00000034488.15	chr13:88969591-89471342	Edil3	protein_coding	MGI:1329025	-0.102309	0.0484935	-2.10975	0.0348799	0.321256
ENSMUSG00000034551	ENSMUSG00000034551.13	chrX:110479628-110606776	Hdx	protein_coding	MGI:2685226	0.160345	0.0808655	1.98286	0.0473832	0.366578
ENSMUSG00000034612	ENSMUSG00000034612.8	chr10:82821332-83031734	Chst11	protein_coding	MGI:1927166	0.127931	0.0374779	3.41351	0.000641318	0.0339038
ENSMUSG00000034613	ENSMUSG00000034613.13	chr10:122514667-122781700	Ppm1h	protein_coding	MGI:2442087	0.114654	0.0365203	3.13947	0.00169253	0.0637296
ENSMUSG00000034636	ENSMUSG00000034636.10	chr4:108086921-108158293	Zyg11b	protein_coding	MGI:2685277	0.113943	0.0360069	3.16448	0.00155362	0.0604936
ENSMUSG00000034648	ENSMUSG00000034648.10	chr6:107506729-107547175	Lrrn1	protein_coding	MGI:106038	-0.0801962	0.0365163	-2.19617	0.0280797	0.294417
ENSMUSG00000034663	ENSMUSG00000034663.14	chr5:97145548-97239726	Bmp2k	protein_coding	MGI:2155456	-0.0922191	0.0451555	-2.04226	0.0411261	0.344617
ENSMUSG00000034714	ENSMUSG00000034714.10	chr11:114566257-114611803	Ttyh2	protein_coding	MGI:2157091	-0.228911	0.0390703	-5.85896	4.65773e-09	1.38377e-05
ENSMUSG00000034723	ENSMUSG00000034723.12	chr2:134436105-134486065	Tmx4	protein_coding	MGI:106558	0.0657403	0.0303559	2.16565	0.0303376	0.302598
ENSMUSG00000034732	ENSMUSG00000034732.5	chrX:118836893-118839862	Pabpc5	protein_coding	MGI:2136401	0.340297	0.137055	2.48291	0.0130313
ENSMUSG00000034774	ENSMUSG00000034774.7	chr18:20380397-20418088	Dsg1c	protein_coding	MGI:2664358	0.253904	0.103248	2.45916	0.0139261	0.209383
ENSMUSG00000034793	ENSMUSG00000034793.16	chr11:102080446-102084907	G6pc3	protein_coding	MGI:1915651	-0.0881709	0.0406173	-2.17077	0.0299486	0.301689
ENSMUSG00000034818	ENSMUSG00000034818.18	chr10:81295061-81318543	Celf5	protein_coding	MGI:2442333	0.0907782	0.0287013	3.16286	0.0015623	0.0606499
ENSMUSG00000034891	ENSMUSG00000034891.14	chr13:54906673-54914408	Sncb	protein_coding	MGI:1889011	-0.0901699	0.0348671	-2.5861	0.00970681	0.175611
ENSMUSG00000034903	ENSMUSG00000034903.19	chr2:64918683-65069747	Cobll1	protein_coding	MGI:2442894	-0.13075	0.0565554	-2.31189	0.0207837	0.251078
ENSMUSG00000034997	ENSMUSG00000034997.6	chr14:74878280-74946934	Htr2a	protein_coding	MGI:109521	0.231289	0.0635293	3.64067	0.000271927	0.0184188
ENSMUSG00000035021	ENSMUSG00000035021.14	chr12:54939774-55061133	Baz1a	protein_coding	MGI:1309478	-0.139896	0.0708396	-1.97483	0.0482871	0.369397
ENSMUSG00000035048	ENSMUSG00000035048.14	chr9:102503495-102511624	Anapc13	protein_coding	MGI:1916260	-0.140529	0.0524202	-2.68082	0.00734417	0.153679
ENSMUSG00000035078	ENSMUSG00000035078.7	chr14:63757100-63781431	Mtmr9	protein_coding	MGI:2442842	0.0714388	0.0293503	2.43401	0.0149325	0.216739
ENSMUSG00000035109	ENSMUSG00000035109.15	chr2:125469367-125566068	Shc4	protein_coding	MGI:2655364	-0.127375	0.0641546	-1.98544	0.0470951	0.366092
ENSMUSG00000035173	ENSMUSG00000035173.15	chr19:56775913-56810622	Ccdc186	protein_coding	MGI:2445022	0.085823	0.038092	2.25304	0.0242564	0.273121
ENSMUSG00000035237	ENSMUSG00000035237.8	chr8:106666183-106670014	Lcat	protein_coding	MGI:96755	-0.185048	0.0649653	-2.84842	0.00439372	0.111168
ENSMUSG00000035247	ENSMUSG00000035247.17	chr12:51790505-51876319	Hectd1	protein_coding	MGI:2384768	0.0929912	0.045976	2.02261	0.0431139	0.353261
ENSMUSG00000035274	ENSMUSG00000035274.14	chr9:85724433-85729093	Tpbg	protein_coding	MGI:1341264	-0.12478	0.0509353	-2.44978	0.0142945	0.211708
ENSMUSG00000035407	ENSMUSG00000035407.9	chr4:98643135-98705774	Kank4	protein_coding	MGI:3043381	-0.197943	0.0815407	-2.42754	0.0152018	0.219422
ENSMUSG00000035413	ENSMUSG00000035413.9	chr11:80701001-80712859	Tmem98	protein_coding	MGI:1923457	-0.22581	0.0496398	-4.54897	5.39083e-06	0.00118525
ENSMUSG00000035429	ENSMUSG00000035429.14	chr7:4551611-4607040	Ptprh	protein_coding	MGI:3026877	0.288738	0.126217	2.28763	0.0221592
ENSMUSG00000035437	ENSMUSG00000035437.16	chr2:37333291-37456466	Rabgap1	protein_coding	MGI:2385139	0.0672988	0.0318368	2.11387	0.0345266	0.32024
ENSMUSG00000035441	ENSMUSG00000035441.15	chr11:80372952-80670851	Myo1d	protein_coding	MGI:107728	-0.162424	0.0463763	-3.5023	0.000461251	0.0264993
ENSMUSG00000035469	ENSMUSG00000035469.18	chr14:59438658-59474714	Rcbtb1	protein_coding	MGI:1918580	-0.0897412	0.0421409	-2.12955	0.0332086	0.316113
ENSMUSG00000035486	ENSMUSG00000035486.15	chr10:80192293-80201323	Plk5	protein_coding	MGI:3026984	0.0967486	0.0478578	2.02159	0.0432191	0.353261
ENSMUSG00000035547	ENSMUSG00000035547.15	chr7:97770766-97827481	Capn5	protein_coding	MGI:1100859	0.0895719	0.0431183	2.07735	0.037769	0.332782
ENSMUSG00000035559	ENSMUSG00000035559.10	chr8:71211295-71213592	Mpv17l2	protein_coding	MGI:2681846	-0.119073	0.0560008	-2.12627	0.0334806	0.3171
ENSMUSG00000035566	ENSMUSG00000035566.8	chr14:84681003-84776442	Pcdh17	protein_coding	MGI:2684924	0.182111	0.0477632	3.8128	0.000137404	0.0119929
ENSMUSG00000035614	ENSMUSG00000035614.12	chr12:65012578-65069347	Togaram1	protein_coding	MGI:2684313	0.121316	0.0453647	2.67423	0.00749007	0.155109
ENSMUSG00000035615	ENSMUSG00000035615.13	chr4:45184875-45285936	Frmpd1	protein_coding	MGI:2446274	-0.182599	0.0756908	-2.41243	0.0158464	0.224764
ENSMUSG00000035637	ENSMUSG00000035637.15	chr4:44981395-44990734	Grhpr	protein_coding	MGI:1923488	-0.109308	0.0395384	-2.7646	0.00569934	0.130263
ENSMUSG00000035674	ENSMUSG00000035674.14	chr7:3620372-3623326	Ndufa3	protein_coding	MGI:1913341	-0.10728	0.0332994	-3.22169	0.00127437	0.0527809
ENSMUSG00000035757	ENSMUSG00000035757.18	chr15:88973287-88984543	Selenoo	protein_coding	MGI:1919007	-0.112278	0.0434493	-2.58412	0.00976292	0.175611
ENSMUSG00000035805	ENSMUSG00000035805.14	chr15:88840087-88863210	Mlc1	protein_coding	MGI:2157910	-0.0798726	0.0325037	-2.45734	0.013997	0.209383
ENSMUSG00000035847	ENSMUSG00000035847.16	chrX:69386675-69408690	Ids	protein_coding	MGI:96417	0.0794177	0.0341274	2.32709	0.0199602	0.247222
ENSMUSG00000035891	ENSMUSG00000035891.17	chr15:86023329-86070342	Cerk	protein_coding	MGI:2386052	-0.135368	0.0373826	-3.62114	0.000293303	0.0187902
ENSMUSG00000035933	ENSMUSG00000035933.6	chr12:31704868-31987629	Cog5	protein_coding	MGI:2145130	0.0960246	0.0368972	2.60249	0.00925505	0.171946
ENSMUSG00000036040	ENSMUSG00000036040.15	chr2:26969391-26998993	Adamtsl2	protein_coding	MGI:1925044	0.282383	0.134379	2.10139	0.0356071	0.324642
ENSMUSG00000036046	ENSMUSG00000036046.15	chr15:84828137-84872752	5031439G07Rik	protein_coding	MGI:2444899	-0.117629	0.0358325	-3.28276	0.00102798	0.0470734
ENSMUSG00000036062	ENSMUSG00000036062.14	chr4:42916660-42944752	Phf24	protein_coding	MGI:2140712	0.0815238	0.0279523	2.91653	0.00353947	0.0989064
ENSMUSG00000036095	ENSMUSG00000036095.12	chr12:37867725-38684238	Dgkb	protein_coding	MGI:2442474	0.0945098	0.0373541	2.5301	0.0114029	0.188278
ENSMUSG00000036098	ENSMUSG00000036098.16	chr19:10185636-10218112	Myrf	protein_coding	MGI:2684944	-0.171963	0.0468376	-3.67147	0.000241155	0.0175398
ENSMUSG00000036104	ENSMUSG00000036104.13	chr1:127796510-127871605	Rab3gap1	protein_coding	MGI:2445001	0.0596133	0.0297294	2.0052	0.0449419	0.358628
ENSMUSG00000036218	ENSMUSG00000036218.17	chr15:92294762-92669700	Pdzrn4	protein_coding	MGI:3056996	0.157032	0.0783522	2.00418	0.0450509	0.358779
ENSMUSG00000036225	ENSMUSG00000036225.16	chr18:15101742-15284503	Kctd1	protein_coding	MGI:1918269	0.069522	0.032423	2.14422	0.0320151	0.310713
ENSMUSG00000036264	ENSMUSG00000036264.10	chr11:52655461-53079365	Fstl4	protein_coding	MGI:2443199	0.146726	0.0700302	2.09518	0.0361549	0.325845
ENSMUSG00000036273	ENSMUSG00000036273.16	chr15:91557378-91700323	Lrrk2	protein_coding	MGI:1913975	0.101692	0.0496808	2.04691	0.0406669	0.343201
ENSMUSG00000036278	ENSMUSG00000036278.8	chr19:7034178-7175422	Macrod1	protein_coding	MGI:2147583	-0.21325	0.0641924	-3.32204	0.000893605	0.0427255
ENSMUSG00000036295	ENSMUSG00000036295.6	chr12:41501667-41536430	Lrrn3	protein_coding	MGI:106036	0.115092	0.048951	2.35118	0.0187141	0.2393
ENSMUSG00000036298	ENSMUSG00000036298.11	chr15:91151899-91457464	Slc2a13	protein_coding	MGI:2146030	0.106068	0.0443942	2.38922	0.016884	0.230389
ENSMUSG00000036304	ENSMUSG00000036304.15	chr16:43785396-43800154	Zdhhc23	protein_coding	MGI:2685625	0.162895	0.0531739	3.06344	0.00218805	0.0727763
ENSMUSG00000036323	ENSMUSG00000036323.15	chr5:77122530-77147784	Srp72	protein_coding	MGI:1333795	0.0622046	0.0303355	2.05056	0.04031	0.341742
ENSMUSG00000036333	ENSMUSG00000036333.12	chr12:25024924-25113151	Kidins220	protein_coding	MGI:1924730	0.0845176	0.0312892	2.70118	0.00690947	0.149099
ENSMUSG00000036390	ENSMUSG00000036390.9	chr6:67012080-67014441	Gadd45a	protein_coding	MGI:107799	-0.243602	0.0797973	-3.05275	0.00226752	0.0740931
ENSMUSG00000036395	ENSMUSG00000036395.16	chr9:26674340-26717764	Glb1l2	protein_coding	MGI:2388283	0.438812	0.206795	2.12197	0.0338406
ENSMUSG00000036461	ENSMUSG00000036461.17	chr14:79718634-79819934	Elf1	protein_coding	MGI:107180	-0.128404	0.0626726	-2.04881	0.040481	0.342744
ENSMUSG00000036469	ENSMUSG00000036469.17	chr8:66070552-66924289	Marchf1	protein_coding	MGI:1920175	0.116787	0.0559878	2.08593	0.0369847	0.329217
ENSMUSG00000036478	ENSMUSG00000036478.9	chr10:96452868-96458671	Btg1	protein_coding	MGI:88215	0.0833231	0.03808	2.18811	0.0286619	0.297722
ENSMUSG00000036499	ENSMUSG00000036499.10	chr10:95776512-95881380	Eea1	protein_coding	MGI:2442192	0.128152	0.0415369	3.08526	0.00203374	0.0701561
ENSMUSG00000036501	ENSMUSG00000036501.8	chr18:34575404-34639884	Fam13b	protein_coding	MGI:2447834	0.0759069	0.0348695	2.17689	0.0294889	0.299175
ENSMUSG00000036503	ENSMUSG00000036503.14	chr3:57643483-57742654	Rnf13	protein_coding	MGI:1346341	-0.127803	0.035766	-3.57331	0.000352495	0.0214215
ENSMUSG00000036528	ENSMUSG00000036528.17	chr7:107194414-107347790	Ppfibp2	protein_coding	MGI:894649	-0.219976	0.0595659	-3.693	0.000221628	0.0169545
ENSMUSG00000036545	ENSMUSG00000036545.10	chr11:50492911-50698400	Adamts2	protein_coding	MGI:1347356	-0.146197	0.0663253	-2.20424	0.0275077	0.290098
ENSMUSG00000036561	ENSMUSG00000036561.10	chr15:89095756-89171213	Ppp6r2	protein_coding	MGI:1918724	0.062744	0.03083	2.03516	0.0418348	0.347866
ENSMUSG00000036580	ENSMUSG00000036580.16	chr3:55019529-55044743	Spg20	protein_coding	MGI:2139806	-0.0821681	0.0381665	-2.15289	0.0313275	0.307482
ENSMUSG00000036585	ENSMUSG00000036585.17	chr18:38971726-39062525	Fgf1	protein_coding	MGI:95515	-0.107082	0.0418823	-2.55674	0.0105658	0.182034
ENSMUSG00000036591	ENSMUSG00000036591.17	chr2:20852730-20973692	Arhgap21	protein_coding	MGI:1918685	0.0954988	0.0401317	2.37964	0.0173297	0.232823
ENSMUSG00000036613	ENSMUSG00000036613.9	chr12:28801802-28919864	Eipr1	protein_coding	MGI:1289332	0.109115	0.0372683	2.92782	0.00341343	0.0960857
ENSMUSG00000036634	ENSMUSG00000036634.16	chr7:30598601-30614298	Mag	protein_coding	MGI:96912	-0.212736	0.0435651	-4.88318	1.04386e-06	0.000456157
ENSMUSG00000036667	ENSMUSG00000036667.15	chr6:42644936-42687022	Tcaf1	protein_coding	MGI:1914665	0.0742443	0.0300981	2.46674	0.0136348	0.207392
ENSMUSG00000036699	ENSMUSG00000036699.13	chrX:35459557-35462811	Zcchc12	protein_coding	MGI:1919943	0.0859321	0.0414106	2.07512	0.0379751	0.333693
ENSMUSG00000036712	ENSMUSG00000036712.16	chr8:89423656-89478573	Cyld	protein_coding	MGI:1921506	0.0939912	0.0390498	2.40696	0.016086	0.22616
ENSMUSG00000036737	ENSMUSG00000036737.13	chr9:119067498-119151493	Oxsr1	protein_coding	MGI:1917378	-0.0906264	0.0317996	-2.84993	0.00437294	0.111074
ENSMUSG00000036751	ENSMUSG00000036751.8	chr7:30316286-30325576	Cox6b1	protein_coding	MGI:107460	-0.102525	0.0328094	-3.12486	0.00177889	0.0657417
ENSMUSG00000036777	ENSMUSG00000036777.9	chr9:22243308-22300484	Anln	protein_coding	MGI:1920174	-0.202561	0.0587129	-3.45003	0.00056052	0.0306284
ENSMUSG00000036800	ENSMUSG00000036800.9	chr15:71303458-71599687	Fam135b	protein_coding	MGI:1917613	0.114442	0.0542521	2.10946	0.0349052	0.321261
ENSMUSG00000036825	ENSMUSG00000036825.13	chr3:146110397-146145899	Ssx2ip	protein_coding	MGI:2139150	0.0767846	0.0385954	1.98947	0.0466489	0.364113
ENSMUSG00000036835	ENSMUSG00000036835.8	chr7:30261288-30263052	Psenen	protein_coding	MGI:1913590	-0.0978417	0.0432344	-2.26305	0.0236325	0.268688
ENSMUSG00000036850	ENSMUSG00000036850.5	chr2:24864129-24865110	Mrpl41	protein_coding	MGI:1333816	-0.090895	0.0440111	-2.06527	0.0388973	0.337141
ENSMUSG00000036885	ENSMUSG00000036885.15	chr3:62245765-62369642	Arhgef26	protein_coding	MGI:1918053	-0.108872	0.0498005	-2.18617	0.0288035	0.298186
ENSMUSG00000036894	ENSMUSG00000036894.4	chr3:61269059-61275851	Rap2b	protein_coding	MGI:1921262	0.128437	0.0363206	3.53619	0.000405941	0.0241766
ENSMUSG00000036902	ENSMUSG00000036902.12	chr8:86363217-86427553	Neto2	protein_coding	MGI:1921763	0.101604	0.0492913	2.0613	0.0392748	0.337141
ENSMUSG00000036943	ENSMUSG00000036943.10	chr9:66750946-66826969	Rab8b	protein_coding	MGI:2442982	0.0732524	0.036739	1.99386	0.0461674	0.364103
ENSMUSG00000036949	ENSMUSG00000036949.17	chr2:14393127-14499788	Slc39a12	protein_coding	MGI:2139274	-0.12783	0.0421224	-3.03472	0.0024076	0.0774277
ENSMUSG00000036972	ENSMUSG00000036972.15	chr9:91244466-91271401	Zic4	protein_coding	MGI:107201	0.334444	0.144861	2.30873	0.0209585	0.25153
ENSMUSG00000037010	ENSMUSG00000037010.8	chrX:47114023-47123730	Apln	protein_coding	MGI:1353624	-0.176034	0.0559137	-3.14831	0.00164217	0.0624457
ENSMUSG00000037031	ENSMUSG00000037031.11	chr10:62021175-62067030	Tspan15	protein_coding	MGI:1917673	-0.1552	0.0450841	-3.44246	0.000576458	0.0311072
ENSMUSG00000037071	ENSMUSG00000037071.4	chr19:44382894-44396318	Scd1	protein_coding	MGI:98239	-0.192618	0.0351702	-5.47674	4.33241e-08	4.69525e-05
ENSMUSG00000037098	ENSMUSG00000037098.19	chr17:26208010-26288529	Rab11fip3	protein_coding	MGI:2444431	0.0756472	0.033033	2.29005	0.0220184	0.257977
ENSMUSG00000037138	ENSMUSG00000037138.19	chr1:38216407-38704036	Aff3	protein_coding	MGI:106927	0.15197	0.0446011	3.40731	0.000656067	0.0344038
ENSMUSG00000037159	ENSMUSG00000037159.12	chr6:40416022-40443747	Wee2	protein_coding	MGI:3027899	-1.03755	0.513629	-2.02004	0.0433797
ENSMUSG00000037166	ENSMUSG00000037166.6	chr7:28988733-28993226	Ppp1r14a	protein_coding	MGI:1931139	-0.286335	0.0614387	-4.66049	3.15458e-06	0.000942867
ENSMUSG00000037236	ENSMUSG00000037236.17	chr18:35695191-35726888	Matr3	protein_coding	MGI:1298379	0.0710939	0.0300792	2.36356	0.0181003	0.238046
ENSMUSG00000037239	ENSMUSG00000037239.9	chr7:28858254-28869836	Spred3	protein_coding	MGI:2142186	0.100072	0.0424344	2.35829	0.0183595	0.238046
ENSMUSG00000037242	ENSMUSG00000037242.9	chr4:134941280-135000125	Clic4	protein_coding	MGI:1352754	-0.0914324	0.0339173	-2.69574	0.00702318	0.149621
ENSMUSG00000037280	ENSMUSG00000037280.13	chr15:100589694-100627257	Galnt6	protein_coding	MGI:1891640	-0.215703	0.0463804	-4.65073	3.3076e-06	0.000942867
ENSMUSG00000037295	ENSMUSG00000037295.8	chr4:134468865-134495335	Ldlrap1	protein_coding	MGI:2140175	-0.245211	0.0635187	-3.86046	0.000113174	0.010365
ENSMUSG00000037316	ENSMUSG00000037316.10	chr8:26254566-26275315	Bag4	protein_coding	MGI:1914634	0.100789	0.0357245	2.82129	0.00478311	0.117955
ENSMUSG00000037325	ENSMUSG00000037325.11	chr3:36627291-36667626	Bbs7	protein_coding	MGI:1918742	0.104062	0.0460285	2.26082	0.0237703	0.269279
ENSMUSG00000037341	ENSMUSG00000037341.15	chrX:19971993-20158046	Slc9a7	protein_coding	MGI:2444530	0.207079	0.0806182	2.56864	0.0102097	0.179429
ENSMUSG00000037348	ENSMUSG00000037348.16	chr4:134224008-134237546	Paqr7	protein_coding	MGI:1919154	-0.134776	0.0384581	-3.50448	0.000457503	0.0264437
ENSMUSG00000037349	ENSMUSG00000037349.10	chr19:6970386-6973485	Nudt22	protein_coding	MGI:1915573	-0.165785	0.0820215	-2.02124	0.0432548	0.353261
ENSMUSG00000037362	ENSMUSG00000037362.9	chr15:54609098-54617435	Ccn3	protein_coding	MGI:109185	0.478979	0.188379	2.54264	0.0110017	0.185334
ENSMUSG00000037416	ENSMUSG00000037416.14	chr18:49965737-50098540	Dmxl1	protein_coding	MGI:2443926	0.106648	0.0479386	2.22467	0.0261035	0.281389
ENSMUSG00000037419	ENSMUSG00000037419.10	chr9:14265286-14292803	Endod1	protein_coding	MGI:1919196	-0.0935056	0.0416664	-2.24415	0.0248226	0.275913
ENSMUSG00000037523	ENSMUSG00000037523.14	chr2:131075983-131089945	Mavs	protein_coding	MGI:2444773	-0.149451	0.0608451	-2.45625	0.0140394	0.209383
ENSMUSG00000037608	ENSMUSG00000037608.17	chr10:20188215-20220359	Bclaf1	protein_coding	MGI:1917580	0.0934627	0.0289035	3.23362	0.00122234	0.05178
ENSMUSG00000037625	ENSMUSG00000037625.8	chr3:31204069-31218473	Cldn11	protein_coding	MGI:106925	-0.193388	0.0425405	-4.54597	5.46826e-06	0.00118525
ENSMUSG00000037643	ENSMUSG00000037643.15	chr3:31049896-31107108	Prkci	protein_coding	MGI:99260	0.075752	0.0345123	2.19493	0.0281685	0.294479
ENSMUSG00000037656	ENSMUSG00000037656.10	chr8:22966804-23059628	Slc20a2	protein_coding	MGI:97851	-0.0908967	0.036883	-2.46446	0.0137219	0.207745
ENSMUSG00000037703	ENSMUSG00000037703.15	chr2:130474759-130484723	Lzts3	protein_coding	MGI:2656976	0.0631394	0.0320987	1.96704	0.0491786	0.372274
ENSMUSG00000037706	ENSMUSG00000037706.18	chr7:142606476-142621671	Cd81	protein_coding	MGI:1096398	-0.0741534	0.0296668	-2.49954	0.0124353	0.196264
ENSMUSG00000037712	ENSMUSG00000037712.18	chr14:45696252-45767575	Fermt2	protein_coding	MGI:2385001	-0.112356	0.0341344	-3.29157	0.000996315	0.0457847
ENSMUSG00000037727	ENSMUSG00000037727.7	chr2:130422540-130424474	Avp	protein_coding	MGI:88121	-1.5093	0.660283	-2.28584	0.0222638	0.259083
ENSMUSG00000037788	ENSMUSG00000037788.15	chr6:57704792-57802144	Vopp1	protein_coding	MGI:2141658	0.128062	0.0378855	3.38024	0.000724216	0.0368392
ENSMUSG00000037824	ENSMUSG00000037824.7	chr14:40628402-40688764	Tspan14	protein_coding	MGI:1196325	-0.108034	0.0450459	-2.3983	0.0164714	0.229289
ENSMUSG00000037826	ENSMUSG00000037826.6	chr6:57483487-57512453	Ppm1k	protein_coding	MGI:2442111	0.0912886	0.0359641	2.53833	0.0111383	0.186907
ENSMUSG00000037855	ENSMUSG00000037855.16	chr10:67721933-67748492	Zfp365	protein_coding	MGI:2143676	0.0709581	0.0341923	2.07526	0.0379623	0.333693
ENSMUSG00000037868	ENSMUSG00000037868.16	chr10:67371305-67378018	Egr2	protein_coding	MGI:95296	0.291004	0.134596	2.16206	0.0306136	0.303452
ENSMUSG00000037960	ENSMUSG00000037960.12	chr13:49356426-49369513	Card19	protein_coding	MGI:1915730	-0.227802	0.0806385	-2.82498	0.00472835	0.116905
ENSMUSG00000037984	ENSMUSG00000037984.10	chr6:55654807-55658248	Neurod6	protein_coding	MGI:106593	0.412884	0.17529	2.35543	0.0185011	0.238046
ENSMUSG00000038014	ENSMUSG00000038014.8	chr13:49032695-49121493	Fam120a	protein_coding	MGI:2446163	0.0638573	0.0259737	2.45853	0.0139506	0.209383
ENSMUSG00000038020	ENSMUSG00000038020.6	chr11:98727611-98744523	Rapgefl1	protein_coding	MGI:3611446	0.12992	0.046389	2.80066	0.00509977	0.122751
ENSMUSG00000038039	ENSMUSG00000038039.14	chr10:58091319-58141421	Gcc2	protein_coding	MGI:1917547	0.0980427	0.0371542	2.6388	0.00831989	0.164394
ENSMUSG00000038070	ENSMUSG00000038070.16	chr4:84802546-85050158	Cntln	protein_coding	MGI:2443104	0.104092	0.0484058	2.15041	0.0315231	0.308007
ENSMUSG00000038102	ENSMUSG00000038102.16	chr8:47943150-47986505	Trappc11	protein_coding	MGI:2444585	0.0698443	0.0312304	2.23642	0.0253244	0.277248
ENSMUSG00000038156	ENSMUSG00000038156.17	chr7:113365235-113642605	Spon1	protein_coding	MGI:2385287	0.100132	0.0410885	2.43697	0.0148109	0.216179
ENSMUSG00000038170	ENSMUSG00000038170.16	chr3:97597140-97796023	Pde4dip	protein_coding	MGI:1891434	0.0840304	0.0336408	2.49787	0.0124943	0.196955
ENSMUSG00000038173	ENSMUSG00000038173.16	chr8:47439922-47549797	Enpp6	protein_coding	MGI:2445171	-0.162153	0.0591744	-2.74025	0.00613924	0.137894
ENSMUSG00000038174	ENSMUSG00000038174.15	chr1:58561965-58625482	Fam126b	protein_coding	MGI:1098784	0.115175	0.0410085	2.80857	0.00497621	0.120738
ENSMUSG00000038187	ENSMUSG00000038187.15	chr7:112914833-112968599	Btbd10	protein_coding	MGI:1916065	0.146547	0.0376473	3.89262	9.9166e-05	0.00941353
ENSMUSG00000038248	ENSMUSG00000038248.9	chr10:42878496-43050526	Sobp	protein_coding	MGI:1924427	0.10362	0.0433732	2.38903	0.0168928	0.230389
ENSMUSG00000038264	ENSMUSG00000038264.9	chr9:57847395-57870148	Sema7a	protein_coding	MGI:1306826	-0.102037	0.0462121	-2.20802	0.027243	0.28884
ENSMUSG00000038301	ENSMUSG00000038301.16	chr6:51500881-51567659	Snx10	protein_coding	MGI:1919232	0.0698406	0.034577	2.01986	0.0433982	0.353261
ENSMUSG00000038312	ENSMUSG00000038312.11	chr2:155543597-155571395	Edem2	protein_coding	MGI:1915540	-0.0942198	0.0469812	-2.00548	0.0449119	0.358628
ENSMUSG00000038344	ENSMUSG00000038344.15	chrX:161561915-161612450	Txlng	protein_coding	MGI:3590652	0.111618	0.052131	2.1411	0.032266	0.311534
ENSMUSG00000038375	ENSMUSG00000038375.16	chr2:155222979-155231770	Trp53inp2	protein_coding	MGI:1915978	-0.109708	0.0293348	-3.73986	0.000184122	0.0147185
ENSMUSG00000038417	ENSMUSG00000038417.5	chr10:41064168-41179256	Fig4	protein_coding	MGI:2143585	0.0924157	0.03995	2.31328	0.020707	0.250635
ENSMUSG00000038446	ENSMUSG00000038446.9	chr10:40707617-40759307	Cdc40	protein_coding	MGI:1918963	0.127005	0.0381532	3.32882	0.000872163	0.0418542
ENSMUSG00000038485	ENSMUSG00000038485.7	chr11:97253261-97289368	Socs7	protein_coding	MGI:2651588	0.0685712	0.0333061	2.05882	0.0395116	0.337965
ENSMUSG00000038495	ENSMUSG00000038495.15	chr3:96011839-96068446	Otud7b	protein_coding	MGI:2654703	-0.13367	0.0417101	-3.20475	0.00135178	0.0552828
ENSMUSG00000038526	ENSMUSG00000038526.15	chr3:95805080-95812003	Car14	protein_coding	MGI:1344341	-0.238423	0.0552719	-4.31365	1.60581e-05	0.00271214
ENSMUSG00000038564	ENSMUSG00000038564.12	chr5:31410621-31448460	Ift172	protein_coding	MGI:2682064	0.0638824	0.0323154	1.97684	0.0480599	0.368674
ENSMUSG00000038602	ENSMUSG00000038602.8	chr10:52566629-52987718	Slc35f1	protein_coding	MGI:2139810	0.105253	0.0340174	3.09408	0.00197424	0.0688337
ENSMUSG00000038630	ENSMUSG00000038630.9	chr4:58943628-58958355	Zkscan16	protein_coding	MGI:3510405	0.221746	0.0968315	2.29002	0.0220203	0.257977
ENSMUSG00000038648	ENSMUSG00000038648.6	chr6:37304190-37419081	Creb3l2	protein_coding	MGI:2442695	-0.0977864	0.0449518	-2.17536	0.0296029	0.299833
ENSMUSG00000038665	ENSMUSG00000038665.16	chr6:36822957-37277119	Dgki	protein_coding	MGI:2443430	0.204814	0.0624452	3.2799	0.00103843	0.0472194
ENSMUSG00000038668	ENSMUSG00000038668.15	chr4:58435255-58553898	Lpar1	protein_coding	MGI:108429	-0.129813	0.044092	-2.94415	0.00323846	0.0925629
ENSMUSG00000038690	ENSMUSG00000038690.16	chr5:145120508-145128872	Atp5j2	protein_coding	MGI:1927558	-0.0974705	0.0352299	-2.7667	0.00566275	0.130002
ENSMUSG00000038695	ENSMUSG00000038695.14	chr7:44117404-44121086	Josd2	protein_coding	MGI:1913374	-0.0953618	0.0450791	-2.11543	0.034393	0.320053
ENSMUSG00000038702	ENSMUSG00000038702.7	chr1:111786432-111792648	Dsel	protein_coding	MGI:2442948	0.158089	0.0447284	3.53442	0.000408671	0.0241766
ENSMUSG00000038760	ENSMUSG00000038760.15	chr15:44059531-44099308	Trhr	protein_coding	MGI:98824	0.610454	0.139327	4.38144	1.17898e-05	0.00219037
ENSMUSG00000038774	ENSMUSG00000038774.10	chr10:50468765-50727581	Ascc3	protein_coding	MGI:1925237	0.147601	0.0554268	2.66299	0.00774493	0.158121
ENSMUSG00000038777	ENSMUSG00000038777.20	chr3:95067768-95081335	Sema6c	protein_coding	MGI:1338032	-0.126634	0.0539535	-2.34709	0.0189207	0.240404
ENSMUSG00000038900	ENSMUSG00000038900.18	chr2:32851571-32855357	Rpl12	protein_coding	MGI:98002	-0.0625067	0.0290609	-2.15088	0.0314854	0.308007
ENSMUSG00000038916	ENSMUSG00000038916.8	chr10:29019835-29075626	Soga3	protein_coding	MGI:1914662	0.108823	0.0345938	3.14572	0.00165676	0.0628169
ENSMUSG00000038936	ENSMUSG00000038936.14	chr1:179495775-179514754	Sccpdh	protein_coding	MGI:1924486	-0.142337	0.0384867	-3.69835	0.000217008	0.0166993
ENSMUSG00000038984	ENSMUSG00000038984.5	chr15:33684021-33688030	Tspyl5	protein_coding	MGI:2442458	0.0932507	0.0338384	2.75577	0.00585547	0.13288
ENSMUSG00000038990	ENSMUSG00000038990.15	chr2:179900333-179915289	Cables2	protein_coding	MGI:2182335	-0.120721	0.0447266	-2.69908	0.00695312	0.149217
ENSMUSG00000039037	ENSMUSG00000039037.6	chr3:152522718-152687883	St6galnac5	protein_coding	MGI:1349471	0.149901	0.0487637	3.07402	0.00211195	0.0717955
ENSMUSG00000039058	ENSMUSG00000039058.12	chr3:152168452-152373997	Ak5	protein_coding	MGI:2677491	0.201489	0.0537222	3.75056	0.000176439	0.0144314
ENSMUSG00000039068	ENSMUSG00000039068.17	chr3:152101110-152168463	Zzz3	protein_coding	MGI:1920453	0.0811488	0.0317923	2.55247	0.0106963	0.183275
ENSMUSG00000039100	ENSMUSG00000039100.11	chr15:31456037-31531199	Marchf6	protein_coding	MGI:2442773	0.0780902	0.0343591	2.27277	0.0230403	0.264932
ENSMUSG00000039106	ENSMUSG00000039106.7	chr5:28047147-28060086	Htr5a	protein_coding	MGI:96283	0.157429	0.0540498	2.91266	0.00358362	0.0994497
ENSMUSG00000039154	ENSMUSG00000039154.9	chr17:56277467-56283625	Shd	protein_coding	MGI:1099461	-0.186936	0.0616622	-3.03162	0.00243248	0.0777614
ENSMUSG00000039220	ENSMUSG00000039220.17	chr17:36227326-36243175	Ppp1r10	protein_coding	MGI:1289273	0.0740254	0.0372685	1.98627	0.0470034	0.365598
ENSMUSG00000039262	ENSMUSG00000039262.17	chr2:32041094-32124549	Prrc2b	protein_coding	MGI:1923304	0.0923139	0.0442192	2.08764	0.03683	0.328837
ENSMUSG00000039270	ENSMUSG00000039270.10	chr4:70345302-70453232	Megf9	protein_coding	MGI:1918264	0.098704	0.0364258	2.70973	0.0067338	0.147334
ENSMUSG00000039313	ENSMUSG00000039313.15	chr9:89469269-89505178	Minar1	protein_coding	MGI:2667167	-0.217362	0.0997131	-2.17988	0.0292665	0.299175
ENSMUSG00000039354	ENSMUSG00000039354.17	chr1:72622410-72672293	Smarcal1	protein_coding	MGI:1859183	0.0950494	0.042374	2.24311	0.0248899	0.276059
ENSMUSG00000039375	ENSMUSG00000039375.17	chr8:55082090-55340219	Wdr17	protein_coding	MGI:1924662	0.0934901	0.0370417	2.52392	0.0116055	0.190087
ENSMUSG00000039395	ENSMUSG00000039395.9	chr1:72198601-72251466	Mreg	protein_coding	MGI:2151839	-0.343413	0.116986	-2.93552	0.00332989	0.0939376
ENSMUSG00000039431	ENSMUSG00000039431.17	chr8:41004136-41087840	Mtmr7	protein_coding	MGI:1891693	0.0847761	0.0354205	2.39342	0.0166922	0.230204
ENSMUSG00000039452	ENSMUSG00000039452.7	chr9:65972458-65977001	Snx22	protein_coding	MGI:2685966	-0.161541	0.0689976	-2.34126	0.0192188	0.241956
ENSMUSG00000039458	ENSMUSG00000039458.16	chr15:12205114-12274582	Mtmr12	protein_coding	MGI:2443034	0.0883103	0.0427913	2.06375	0.0390418	0.337141
ENSMUSG00000039620	ENSMUSG00000039620.18	chr8:36924702-36983724	Trmt9b	protein_coding	MGI:2442328	0.151192	0.0580563	2.60423	0.009208	0.171808
ENSMUSG00000039661	ENSMUSG00000039661.15	chr8:31579499-31587075	Dusp26	protein_coding	MGI:1914209	-0.073438	0.0311687	-2.35615	0.0184657	0.238046
ENSMUSG00000039682	ENSMUSG00000039682.13	chr5:45650716-45670033	Lap3	protein_coding	MGI:1914238	-0.107166	0.0375396	-2.85475	0.0043071	0.11078
ENSMUSG00000039697	ENSMUSG00000039697.17	chr10:30504995-30679322	Ncoa7	protein_coding	MGI:2444847	0.0843011	0.0361656	2.33097	0.0197547	0.245902
ENSMUSG00000039704	ENSMUSG00000039704.9	chr15:9140637-9202569	Lmbrd2	protein_coding	MGI:2444173	0.0716444	0.0356621	2.00898	0.0445397	0.357294
ENSMUSG00000039706	ENSMUSG00000039706.12	chr5:44629474-44957022	Ldb2	protein_coding	MGI:894670	0.098823	0.0492509	2.00652	0.0448005	0.358541
ENSMUSG00000039735	ENSMUSG00000039735.17	chr3:122332368-122413364	Fnbp1l	protein_coding	MGI:1925642	0.116905	0.0453385	2.57848	0.00992357	0.177277
ENSMUSG00000039781	ENSMUSG00000039781.15	chr11:119955256-119977653	Cep131	protein_coding	MGI:107440	-0.110846	0.0538509	-2.05839	0.0395527	0.337965
ENSMUSG00000039787	ENSMUSG00000039787.14	chr2:29759176-29772852	Cercam	protein_coding	MGI:2139134	-0.16303	0.0653523	-2.49464	0.0126087	0.198038
ENSMUSG00000039813	ENSMUSG00000039813.15	chr4:46604390-46650209	Tbc1d2	protein_coding	MGI:2652885	-0.209811	0.102969	-2.03762	0.0415882	0.347593
ENSMUSG00000039908	ENSMUSG00000039908.15	chr11:119246383-119271905	Slc26a11	protein_coding	MGI:2444589	-0.229934	0.104566	-2.19894	0.0278819	0.293369
ENSMUSG00000039911	ENSMUSG00000039911.14	chr4:149980740-150039500	Spsb1	protein_coding	MGI:1921896	-0.197397	0.0482765	-4.08888	4.33454e-05	0.00536863
ENSMUSG00000039929	ENSMUSG00000039929.15	chr16:90548415-90607301	Urb1	protein_coding	MGI:2146468	0.116474	0.0578142	2.01462	0.0439447	0.354969
ENSMUSG00000040022	ENSMUSG00000040022.15	chr19:59891316-59932086	Rab11fip2	protein_coding	MGI:1922248	0.0889452	0.0330883	2.68812	0.00718562	0.151832
ENSMUSG00000040040	ENSMUSG00000040040.17	chr14:57661519-57755393	Ift88	protein_coding	MGI:98715	0.127406	0.0520457	2.44796	0.0143669	0.211708
ENSMUSG00000040055	ENSMUSG00000040055.10	chr14:57360760-57371068	Gjb6	protein_coding	MGI:107588	-0.150646	0.049994	-3.01329	0.00258434	0.0805978
ENSMUSG00000040105	ENSMUSG00000040105.4	chr19:28941353-28944211	Plpp6	protein_coding	MGI:1921661	0.0940462	0.0381153	2.46741	0.0136094	0.207392
ENSMUSG00000040164	ENSMUSG00000040164.4	chr2:164005539-164013033	Kcns1	protein_coding	MGI:1197019	-0.166193	0.0647687	-2.56595	0.0102893	0.17999
ENSMUSG00000040183	ENSMUSG00000040183.14	chr4:32804035-32950841	Ankrd6	protein_coding	MGI:2154278	0.121024	0.038677	3.12909	0.00175346	0.0653129
ENSMUSG00000040234	ENSMUSG00000040234.17	chr6:146503850-146544322	Tm7sf3	protein_coding	MGI:1914873	-0.0653697	0.0328655	-1.98901	0.0467005	0.364113
ENSMUSG00000040339	ENSMUSG00000040339.11	chr3:108878313-108934923	Fam102b	protein_coding	MGI:3036259	0.117271	0.0430221	2.72584	0.0064138	0.142566
ENSMUSG00000040364	ENSMUSG00000040364.9	chr7:45327110-45343826	Sec1	protein_coding	MGI:1928893	-0.700881	0.313357	-2.23668	0.025307
ENSMUSG00000040373	ENSMUSG00000040373.13	chr11:107765431-107805881	Cacng5	protein_coding	MGI:2157946	0.191186	0.0862439	2.21681	0.0266359	0.284168
ENSMUSG00000040389	ENSMUSG00000040389.16	chr3:108498595-108553035	Wdr47	protein_coding	MGI:2139593	0.0783587	0.0290845	2.69418	0.00705629	0.149946
ENSMUSG00000040446	ENSMUSG00000040446.5	chr18:24618017-24663261	Rprd1a	protein_coding	MGI:2385066	0.0865593	0.0338623	2.55621	0.0105819	0.182034
ENSMUSG00000040452	ENSMUSG00000040452.10	chr15:20449351-21589619	Cdh12	protein_coding	MGI:109503	0.267432	0.072559	3.68572	0.00022806	0.0172022
ENSMUSG00000040560	ENSMUSG00000040560.11	chr18:63841756-64122847	Wdr7	protein_coding	MGI:1860197	0.0854989	0.0392169	2.18015	0.0292462	0.299175
ENSMUSG00000040563	ENSMUSG00000040563.14	chr9:21848329-21860203	Plppr2	protein_coding	MGI:2384575	0.0730028	0.0361223	2.02099	0.043281	0.353261
ENSMUSG00000040570	ENSMUSG00000040570.15	chr5:8540334-8672952	Rundc3b	protein_coding	MGI:2685286	0.105617	0.0390875	2.70206	0.00689113	0.149099
ENSMUSG00000040605	ENSMUSG00000040605.8	chr16:97157942-97244136	Bace2	protein_coding	MGI:1860440	-0.222293	0.09017	-2.46526	0.0136912	0.207596
ENSMUSG00000040612	ENSMUSG00000040612.14	chr1:166081708-166144392	Ildr2	protein_coding	MGI:1196370	0.147151	0.0523625	2.81024	0.00495048	0.120564
ENSMUSG00000040616	ENSMUSG00000040616.4	chr4:141758303-141811615	Tmem51	protein_coding	MGI:2384874	-0.230404	0.0849131	-2.7134	0.00665958	0.14605
ENSMUSG00000040640	ENSMUSG00000040640.12	chr14:27344385-28200494	Erc2	protein_coding	MGI:1098749	0.152464	0.0393959	3.87004	0.000108818	0.0101084
ENSMUSG00000040720	ENSMUSG00000040720.16	chr4:11485958-11550684	Virma	protein_coding	MGI:1913435	0.136648	0.042668	3.20258	0.00136202	0.0555271
ENSMUSG00000040723	ENSMUSG00000040723.15	chr1:165474085-165537326	Rcsd1	protein_coding	MGI:2676394	-0.162014	0.0728884	-2.22277	0.0262311	0.281389
ENSMUSG00000040725	ENSMUSG00000040725.14	chr7:25420590-25454182	Hnrnpul1	protein_coding	MGI:2443517	0.055279	0.0277317	1.99335	0.0462231	0.364113
ENSMUSG00000040740	ENSMUSG00000040740.8	chr4:141346135-141351132	Slc25a34	protein_coding	MGI:2686215	0.151474	0.0689331	2.19741	0.027991	0.293804
ENSMUSG00000040759	ENSMUSG00000040759.10	chr14:55173718-55176731	Cmtm5	protein_coding	MGI:2447164	-0.120444	0.0454515	-2.64994	0.00805052	0.161819
ENSMUSG00000040760	ENSMUSG00000040760.12	chr14:26640945-26693189	Appl1	protein_coding	MGI:1920243	0.0876467	0.0350417	2.50121	0.0123769	0.196009
ENSMUSG00000040785	ENSMUSG00000040785.20	chr16:94171477-94270202	Ttc3	protein_coding	MGI:1276539	0.0775635	0.0310677	2.4966	0.0125391	0.197185
ENSMUSG00000040842	ENSMUSG00000040842.18	chr4:140840312-140867086	Szrd1	protein_coding	MGI:1098672	-0.07313	0.0349222	-2.09408	0.0362524	0.326263
ENSMUSG00000040855	ENSMUSG00000040855.16	chrX:161194950-161426645	Reps2	protein_coding	MGI:2663511	0.113197	0.0429226	2.63725	0.00835822	0.164394
ENSMUSG00000040856	ENSMUSG00000040856.18	chr12:109418749-109429262	Dlk1	protein_coding	MGI:94900	0.429339	0.144059	2.9803	0.00287971	0.0873714
ENSMUSG00000041014	ENSMUSG00000041014.18	chr14:38090909-39195045	Nrg3	protein_coding	MGI:1097165	0.121756	0.0497778	2.44599	0.0144457	0.212518
ENSMUSG00000041035	ENSMUSG00000041035.10	chr19:45549054-45568202	DPCD	protein_coding		-0.082466	0.0374014	-2.20489	0.027462	0.290098
ENSMUSG00000041141	ENSMUSG00000041141.8	chr7:16693604-16698532	Pnma8a	protein_coding	MGI:1918941	0.117227	0.0341393	3.43378	0.000595221	0.0318554
ENSMUSG00000041272	ENSMUSG00000041272.12	chr4:6686353-6991557	Tox	protein_coding	MGI:2181659	0.17788	0.083114	2.14019	0.0323394	0.311767
ENSMUSG00000041309	ENSMUSG00000041309.18	chr7:139159292-139162713	Nkx6-2	protein_coding	MGI:1352738	-0.268801	0.0737999	-3.6423	0.000270211	0.0183984
ENSMUSG00000041329	ENSMUSG00000041329.14	chr11:69490562-69496768	Atp1b2	protein_coding	MGI:88109	-0.118783	0.0363335	-3.26925	0.00107834	0.0481593
ENSMUSG00000041343	ENSMUSG00000041343.20	chr7:92230931-92286350	Ankrd42	protein_coding	MGI:1921095	0.126836	0.0637588	1.98931	0.0466667	0.364113
ENSMUSG00000041346	ENSMUSG00000041346.12	chr11:69452584-69471081	Wrap53	protein_coding	MGI:2384933	-0.144516	0.0552902	-2.61377	0.00895495	0.169272
ENSMUSG00000041362	ENSMUSG00000041362.18	chr19:58961788-59064532	Shtn1	protein_coding	MGI:1918903	-0.088244	0.0408858	-2.1583	0.0309042	0.305171
ENSMUSG00000041377	ENSMUSG00000041377.13	chr6:120070311-120177300	Ninj2	protein_coding	MGI:1352751	-0.47919	0.103475	-4.63098	3.63932e-06	0.000986028
ENSMUSG00000041378	ENSMUSG00000041378.3	chr16:18595597-18597012	Cldn5	protein_coding	MGI:1276112	-0.159088	0.0507815	-3.13279	0.00173154	0.0648952
ENSMUSG00000041380	ENSMUSG00000041380.14	chrX:145745509-145980273	Htr2c	protein_coding	MGI:96281	0.122324	0.0554846	2.20465	0.0274788	0.290098
ENSMUSG00000041423	ENSMUSG00000041423.17	chr3:88271891-88275848	Paqr6	protein_coding	MGI:1916207	-0.317223	0.091716	-3.45876	0.000542675	0.0299046
ENSMUSG00000041453	ENSMUSG00000041453.13	chr5:146769700-146773842	Rpl21	protein_coding	MGI:1278340	-0.0769981	0.0287455	-2.67861	0.00739286	0.154324
ENSMUSG00000041556	ENSMUSG00000041556.9	chr4:148245078-148250881	Fbxo2	protein_coding	MGI:2446216	-0.109595	0.043733	-2.506	0.0122106	0.195324
ENSMUSG00000041570	ENSMUSG00000041570.15	chr1:136195861-136273842	Camsap2	protein_coding	MGI:1922434	0.0783705	0.0380101	2.06183	0.0392235	0.337141
ENSMUSG00000041598	ENSMUSG00000041598.8	chr11:113617676-113642707	Cdc42ep4	protein_coding	MGI:1929760	-0.103354	0.043272	-2.38848	0.0169182	0.230389
ENSMUSG00000041607	ENSMUSG00000041607.18	chr18:82493271-82603762	Mbp	protein_coding	MGI:96925	-0.230312	0.0394583	-5.83684	5.32014e-09	1.38377e-05
ENSMUSG00000041608	ENSMUSG00000041608.9	chr9:120368884-120397393	Entpd3	protein_coding	MGI:1321386	-0.120341	0.0541427	-2.22267	0.0262382	0.281389
ENSMUSG00000041625	ENSMUSG00000041625.16	chr14:123053635-123151169	Ggact	protein_coding	MGI:2385008	-0.152366	0.0615534	-2.47535	0.0133106	0.205099
ENSMUSG00000041695	ENSMUSG00000041695.3	chr11:110956990-110967647	Kcnj2	protein_coding	MGI:104744	0.129041	0.064002	2.0162	0.0437792	0.354421
ENSMUSG00000041696	ENSMUSG00000041696.15	chr9:65305788-65322135	Rasl12	protein_coding	MGI:1918034	-0.275037	0.109964	-2.50114	0.0123793	0.196009
ENSMUSG00000041697	ENSMUSG00000041697.10	chr5:115483701-115487040	Cox6a1	protein_coding	MGI:103099	-0.0883113	0.0309366	-2.85459	0.00430925	0.11078
ENSMUSG00000041708	ENSMUSG00000041708.13	chr15:83663668-83742695	Mpped1	protein_coding	MGI:106316	0.158394	0.0431247	3.67292	0.000239793	0.0175398
ENSMUSG00000041720	ENSMUSG00000041720.15	chr16:17098215-17224178	Pi4ka	protein_coding	MGI:2448506	0.080292	0.037127	2.16263	0.0305696	0.303452
ENSMUSG00000041762	ENSMUSG00000041762.17	chr2:73171850-73216916	Gpr155	protein_coding	MGI:1915776	0.0884536	0.0414329	2.13486	0.0327724	0.313847
ENSMUSG00000041771	ENSMUSG00000041771.15	chr12:102094992-102233350	Slc24a4	protein_coding	MGI:2447362	0.225325	0.0586051	3.84481	0.000120647	0.0108208
ENSMUSG00000041781	ENSMUSG00000041781.10	chr12:101942247-101972683	Cpsf2	protein_coding	MGI:1861601	0.0840604	0.0376984	2.22981	0.0257598	0.279439
ENSMUSG00000041789	ENSMUSG00000041789.8	chr18:62884745-62889418	2700046A07Rik	lncRNA	MGI:1919803	-0.372637	0.188864	-1.97304	0.0484907
ENSMUSG00000041794	ENSMUSG00000041794.14	chr9:120130579-120303907	Myrip	protein_coding	MGI:2384407	0.0809401	0.0390486	2.07281	0.0381904	0.335106
ENSMUSG00000041801	ENSMUSG00000041801.6	chr1:135693857-135696874	Phlda3	protein_coding	MGI:1351485	-0.106773	0.0528456	-2.02047	0.043335	0.353261
ENSMUSG00000041817	ENSMUSG00000041817.15	chr13:97203794-97267521	Fam169a	protein_coding	MGI:2444268	0.0689687	0.0349791	1.97171	0.0486426	0.370917
ENSMUSG00000041836	ENSMUSG00000041836.11	chr7:135139210-135288022	Ptpre	protein_coding	MGI:97813	0.154841	0.0400553	3.86568	0.000110779	0.0102176
ENSMUSG00000041841	ENSMUSG00000041841.9	chr15:5146127-5148622	Rpl37	protein_coding	MGI:1914531	-0.0679003	0.0295906	-2.29465	0.0217529	0.256945
ENSMUSG00000041889	ENSMUSG00000041889.8	chr1:135298795-135302975	Shisa4	protein_coding	MGI:1924802	-0.0968659	0.0388428	-2.49379	0.0126386	0.198269
ENSMUSG00000041891	ENSMUSG00000041891.17	chr18:66113809-66155651	Lman1	protein_coding	MGI:1917611	0.0888053	0.0375412	2.36554	0.0180037	0.237463
ENSMUSG00000041895	ENSMUSG00000041895.16	chr11:109464157-109502793	Wipi1	protein_coding	MGI:1261864	-0.0878447	0.0381336	-2.3036	0.0212448	0.253244
ENSMUSG00000041923	ENSMUSG00000041923.16	chr18:22826238-23174710	Nol4	protein_coding	MGI:2441684	0.122233	0.0349815	3.49423	0.000475436	0.0271186
ENSMUSG00000041939	ENSMUSG00000041939.15	chr5:114582330-114598652	Mvk	protein_coding	MGI:107624	-0.140526	0.0553269	-2.53992	0.0110878	0.186302
ENSMUSG00000041957	ENSMUSG00000041957.16	chr16:16031182-16090576	Pkp2	protein_coding	MGI:1914701	0.172929	0.0843897	2.04918	0.0404448	0.342661
ENSMUSG00000041974	ENSMUSG00000041974.11	chr16:15707088-15964715	Spidr	protein_coding	MGI:1924834	-0.259546	0.0972432	-2.66904	0.00760685	0.156215
ENSMUSG00000041997	ENSMUSG00000041997.17	chr2:70542751-70656072	Tlk1	protein_coding	MGI:2441683	0.0856173	0.028925	2.95998	0.00307663	0.0897918
ENSMUSG00000042032	ENSMUSG00000042032.14	chr11:40570141-40586030	Mat2b	protein_coding	MGI:1913667	0.0650318	0.0326798	1.98997	0.0465945	0.364113
ENSMUSG00000042078	ENSMUSG00000042078.15	chr5:114164971-114229631	Svop	protein_coding	MGI:1915916	0.065964	0.0319709	2.06325	0.0390886	0.337141
ENSMUSG00000042115	ENSMUSG00000042115.5	chr1:132226364-132235095	Klhdc8a	protein_coding	MGI:2442630	-0.160856	0.0722103	-2.22761	0.0259066	0.280296
ENSMUSG00000042129	ENSMUSG00000042129.9	chr6:116609969-116650913	Rassf4	protein_coding	MGI:2386853	-0.316173	0.0851395	-3.71358	0.000204346	0.0160091
ENSMUSG00000042155	ENSMUSG00000042155.4	chr2:69652288-69666995	Klhl23	protein_coding	MGI:2683536	0.138663	0.0355063	3.90532	9.4102e-05	0.0089985
ENSMUSG00000042216	ENSMUSG00000042216.14	chr5:113391086-113458652	Sgsm1	protein_coding	MGI:107320	0.129692	0.0450472	2.87902	0.00398912	0.107361
ENSMUSG00000042229	ENSMUSG00000042229.10	chr1:134422386-134436512	Rabif	protein_coding	MGI:2138605	0.0774402	0.0389341	1.98901	0.0467002	0.364113
ENSMUSG00000042272	ENSMUSG00000042272.18	chr2:77010684-77110936	Sestd1	protein_coding	MGI:1916262	0.103324	0.045765	2.25771	0.0239635	0.27076
ENSMUSG00000042292	ENSMUSG00000042292.19	chr15:80896482-81074958	Mrtfa	protein_coding	MGI:2384495	0.0904153	0.0434012	2.08324	0.037229	0.329811
ENSMUSG00000042298	ENSMUSG00000042298.19	chr11:62172299-62219277	Ttc19	protein_coding	MGI:1920045	0.0941197	0.0337502	2.78872	0.00529171	0.123817
ENSMUSG00000042351	ENSMUSG00000042351.10	chr15:80456795-80537055	Grap2	protein_coding	MGI:1333842	0.449708	0.198981	2.26006	0.0238175
ENSMUSG00000042406	ENSMUSG00000042406.9	chr15:80139385-80141742	Atf4	protein_coding	MGI:88096	-0.0810927	0.0386111	-2.10024	0.0357074	0.324965
ENSMUSG00000042426	ENSMUSG00000042426.7	chr13:113063988-113105966	Dhx29	protein_coding	MGI:2145374	0.100273	0.0397562	2.52219	0.0116628	0.190174
ENSMUSG00000042472	ENSMUSG00000042472.12	chr12:84363626-84390497	Zfp410	protein_coding	MGI:1289280	-0.107019	0.0544019	-1.9672	0.0491607	0.372274
ENSMUSG00000042496	ENSMUSG00000042496.19	chr9:31191834-31293019	Prdm10	protein_coding	MGI:2682952	0.114893	0.0472534	2.43143	0.0150392	0.217801
ENSMUSG00000042508	ENSMUSG00000042508.17	chr5:9168801-9211776	Dmtf1	protein_coding	MGI:1344415	0.0771763	0.0350322	2.20301	0.027594	0.290575
ENSMUSG00000042514	ENSMUSG00000042514.12	chr18:21683434-21787775	Klhl14	protein_coding	MGI:1921249	-0.470021	0.139185	-3.37695	0.000732932
ENSMUSG00000042523	ENSMUSG00000042523.13	chr12:84161140-84194272	Dnal1	protein_coding	MGI:1921462	0.11155	0.0345183	3.23162	0.0012309	0.0519736
ENSMUSG00000042590	ENSMUSG00000042590.18	chr13:106930947-107073466	Ipo11	protein_coding	MGI:2442377	0.0841522	0.0323068	2.60479	0.00919317	0.171808
ENSMUSG00000042596	ENSMUSG00000042596.8	chr1:19173246-19236570	Tfap2d	protein_coding	MGI:2153466	0.961439	0.263036	3.65516	0.000257019
ENSMUSG00000042680	ENSMUSG00000042680.9	chr18:21260258-21433195	Garem1	protein_coding	MGI:2685790	0.221215	0.0450254	4.91311	8.96419e-07	0.000422014
ENSMUSG00000042700	ENSMUSG00000042700.17	chr12:82216094-82498560	Sipa1l1	protein_coding	MGI:2443679	0.105848	0.0463503	2.28365	0.0223921	0.259083
ENSMUSG00000042724	ENSMUSG00000042724.9	chr12:81767784-81827949	Map3k9	protein_coding	MGI:2449952	0.127843	0.0615096	2.07843	0.0376699	0.332359
ENSMUSG00000042743	ENSMUSG00000042743.14	chr13:104246249-104278243	Sgtb	protein_coding	MGI:2444615	0.114652	0.0314075	3.65045	0.000261779	0.0181355
ENSMUSG00000042747	ENSMUSG00000042747.13	chr3:89153273-89157213	Krtcap2	protein_coding	MGI:1913309	-0.11022	0.0433119	-2.54479	0.0109344	0.185106
ENSMUSG00000042757	ENSMUSG00000042757.17	chr9:103360146-103639036	Tmem108	protein_coding	MGI:1932411	-0.147241	0.0639573	-2.30218	0.0213249	0.253734
ENSMUSG00000042812	ENSMUSG00000042812.6	chr8:121811125-121814883	Foxf1	protein_coding	MGI:1347470	-0.334896	0.167724	-1.99671	0.0458571
ENSMUSG00000042846	ENSMUSG00000042846.9	chr10:63764251-63926056	Lrrtm3	protein_coding	MGI:2389177	0.154529	0.0437236	3.53422	0.000408985	0.0241766
ENSMUSG00000042851	ENSMUSG00000042851.18	chr2:128809322-128860483	Zc3h6	protein_coding	MGI:1926001	0.144009	0.0528948	2.72256	0.00647779	0.143272
ENSMUSG00000042895	ENSMUSG00000042895.7	chr15:41727472-41733116	Abra	protein_coding	MGI:2444891	1.07443	0.486056	2.21051	0.0270697
ENSMUSG00000042942	ENSMUSG00000042942.19	chr18:10325177-10562940	Greb1l	protein_coding	MGI:3576497	0.233339	0.112588	2.0725	0.0382192	0.335106
ENSMUSG00000043067	ENSMUSG00000043067.16	chr9:24323072-24414436	Dpy19l1	protein_coding	MGI:1915685	-0.0798706	0.0369773	-2.15999	0.0307733	0.304489
ENSMUSG00000043079	ENSMUSG00000043079.18	chr18:60727045-60793214	Synpo	protein_coding	MGI:1099446	0.075446	0.0333389	2.263	0.0236354	0.268688
ENSMUSG00000043154	ENSMUSG00000043154.16	chr9:100982283-101128994	Ppp2r3a	protein_coding	MGI:2442104	-0.0870997	0.0390622	-2.22977	0.025763	0.279439
ENSMUSG00000043298	ENSMUSG00000043298.9	chr6:136806925-136812450	Smco3	protein_coding	MGI:2443451	-0.233824	0.0634475	-3.68532	0.000228412	0.0172022
ENSMUSG00000043301	ENSMUSG00000043301.17	chr16:94549495-94798560	Kcnj6	protein_coding	MGI:104781	0.365958	0.0799364	4.57812	4.69171e-06	0.0011005
ENSMUSG00000043333	ENSMUSG00000043333.13	chr4:123681667-123723697	Rhbdl2	protein_coding	MGI:3608413	-0.492994	0.217149	-2.2703	0.0231893
ENSMUSG00000043398	ENSMUSG00000043398.6	chr12:72114750-72117899	Gpr135	protein_coding	MGI:2676315	0.101039	0.0512475	1.97159	0.048657	0.370917
ENSMUSG00000043448	ENSMUSG00000043448.14	chr11:59066394-59074039	Gjc2	protein_coding	MGI:2153060	-0.235115	0.0625698	-3.75765	0.000171518	0.0142987
ENSMUSG00000043461	ENSMUSG00000043461.14	chr3:69726875-69767273	Sptssb	protein_coding	MGI:1913433	-0.342893	0.148003	-2.3168	0.0205147
ENSMUSG00000043463	ENSMUSG00000043463.7	chrX:135758896-135769504	Rab9b	protein_coding	MGI:2442454	0.129257	0.0505305	2.558	0.0105276	0.182034
ENSMUSG00000043496	ENSMUSG00000043496.8	chr6:53792453-53797815	Tril	protein_coding	MGI:1914123	-0.119851	0.0390351	-3.07035	0.00213811	0.0721775
ENSMUSG00000043659	ENSMUSG00000043659.12	chr9:24009292-24227694	Npsr1	protein_coding	MGI:2441738	0.624388	0.188956	3.3044	0.000951785
ENSMUSG00000043670	ENSMUSG00000043670.5	chr10:80855423-80861496	Diras1	protein_coding	MGI:2183442	-0.0931169	0.0344584	-2.7023	0.00688616	0.149099
ENSMUSG00000043773	ENSMUSG00000043773.6	chr9:121766289-121776082	1700048O20Rik	lncRNA	MGI:1920637	0.216473	0.0919213	2.35498	0.0185238	0.238046
ENSMUSG00000043881	ENSMUSG00000043881.10	chr14:79663951-79668476	Kbtbd7	protein_coding	MGI:2685141	0.0993493	0.0396606	2.50499	0.0122455	0.195641
ENSMUSG00000043913	ENSMUSG00000043913.15	chr5:116262700-116427044	Ccdc60	protein_coding	MGI:2141043	-0.466071	0.17935	-2.59867	0.00935852
ENSMUSG00000044024	ENSMUSG00000044024.17	chr18:38088132-38092232	Rell2	protein_coding	MGI:1918044	-0.0896474	0.0397051	-2.25783	0.0239563	0.27076
ENSMUSG00000044067	ENSMUSG00000044067.8	chr12:31756866-31763946	Gpr22	protein_coding	MGI:1920260	0.133956	0.0585502	2.28789	0.0221441	0.258282
ENSMUSG00000044071	ENSMUSG00000044071.10	chr10:123099901-123577109	Tafa2	protein_coding	MGI:2143691	0.20927	0.073174	2.8599	0.00423778	0.110696
ENSMUSG00000044080	ENSMUSG00000044080.10	chr3:90418341-90421699	S100a1	protein_coding	MGI:1338917	-0.107223	0.0407058	-2.63409	0.00843631	0.164394
ENSMUSG00000044167	ENSMUSG00000044167.7	chr3:52175757-52260642	Foxo1	protein_coding	MGI:1890077	0.0691487	0.0323261	2.1391	0.032428	0.312158
ENSMUSG00000044296	ENSMUSG00000044296.11	chr11:50722858-50732379	Zfp879	protein_coding	MGI:3053099	0.245009	0.116725	2.09903	0.0358143	0.325254
ENSMUSG00000044352	ENSMUSG00000044352.7	chr11:53367400-53371101	Sowaha	protein_coding	MGI:2687280	0.0919232	0.0377527	2.43488	0.0148969	0.216705
ENSMUSG00000044375	ENSMUSG00000044375.9	chr17:72050550-72059889	Pcare	protein_coding	MGI:2385061	-0.887056	0.412508	-2.1504	0.0315239
ENSMUSG00000044447	ENSMUSG00000044447.6	chr14:67989584-68170891	Dock5	protein_coding	MGI:2652871	-0.141624	0.0656751	-2.15643	0.0310502	0.306286
ENSMUSG00000044452	ENSMUSG00000044452.11	chr7:35471768-35502428	Zfp507	protein_coding	MGI:1916378	0.140572	0.0561708	2.50257	0.0123294	0.196009
ENSMUSG00000044465	ENSMUSG00000044465.20	chr7:105020418-105049261	Fhip1b	protein_coding	MGI:1921599	0.0790094	0.0340297	2.32178	0.0202447	0.249123
ENSMUSG00000044629	ENSMUSG00000044629.6	chr11:17001586-17029371	Cnrip1	protein_coding	MGI:1917505	0.118358	0.043903	2.6959	0.00701979	0.149621
ENSMUSG00000044647	ENSMUSG00000044647.17	chr2:65676111-65861890	Csrnp3	protein_coding	MGI:1925021	0.0886548	0.0367498	2.41239	0.0158484	0.224764
ENSMUSG00000044667	ENSMUSG00000044667.13	chr3:117112788-117154525	Plppr4	protein_coding	MGI:106530	0.0914464	0.0272531	3.35545	0.000792368	0.039087
ENSMUSG00000044734	ENSMUSG00000044734.17	chr13:33026075-33035168	Serpinb1a	protein_coding	MGI:1913472	-0.315039	0.0635645	-4.95621	7.18814e-07	0.000389508
ENSMUSG00000044912	ENSMUSG00000044912.12	chr12:74044435-74320041	Syt16	protein_coding	MGI:2673872	0.116443	0.0384907	3.02522	0.00248455	0.0786363
ENSMUSG00000044937	ENSMUSG00000044937.16	chr10:86541675-86612708	Ttc41	protein_coding	MGI:2387653	-0.360474	0.148551	-2.42659	0.0152414
ENSMUSG00000044949	ENSMUSG00000044949.5	chr11:32405370-32466687	Ubtd2	protein_coding	MGI:2444752	0.124027	0.0549076	2.25883	0.0238938	0.270443
ENSMUSG00000044986	ENSMUSG00000044986.11	chr15:78283756-78290107	Tst	protein_coding	MGI:98852	-0.119298	0.0472032	-2.52734	0.0114932	0.188962
ENSMUSG00000045010	ENSMUSG00000045010.15	chrX:100833659-100838029	Gm4779	protein_coding	MGI:3646776	-0.639586	0.316055	-2.02366	0.0430055
ENSMUSG00000045087	ENSMUSG00000045087.9	chr9:21154208-21159739	S1pr5	protein_coding	MGI:2150641	-0.242564	0.0530074	-4.57603	4.7388e-06	0.0011005
ENSMUSG00000045128	ENSMUSG00000045128.10	chr8:71347366-71350056	Rpl18a	protein_coding	MGI:1924058	-0.080552	0.0265155	-3.03792	0.00238218	0.0772574
ENSMUSG00000045174	ENSMUSG00000045174.11	chr1:34618738-34630025	Amer3	protein_coding	MGI:3026939	0.152219	0.0411141	3.70237	0.000213594	0.0165344
ENSMUSG00000045294	ENSMUSG00000045294.12	chr5:28276361-28283660	Insig1	protein_coding	MGI:1916289	-0.150663	0.0512978	-2.93702	0.00331387	0.093893
ENSMUSG00000045349	ENSMUSG00000045349.16	chr4:137977714-137988643	Sh2d5	protein_coding	MGI:2446215	0.0737077	0.0329487	2.23704	0.0252837	0.277248
ENSMUSG00000045377	ENSMUSG00000045377.6	chr11:69287345-69289060	Tmem88	protein_coding	MGI:1914270	-0.339083	0.151329	-2.24071	0.0250451
ENSMUSG00000045404	ENSMUSG00000045404.17	chr12:99930758-100028941	Kcnk13	protein_coding	MGI:2384976	-0.125356	0.05817	-2.15499	0.0311625	0.306557
ENSMUSG00000045441	ENSMUSG00000045441.6	chr6:59324211-59403279	Gprin3	protein_coding	MGI:1924785	0.136376	0.0547056	2.49291	0.0126701	0.19844
ENSMUSG00000045532	ENSMUSG00000045532.6	chr11:102830090-102837514	C1ql1	protein_coding	MGI:1344400	-0.141578	0.0667631	-2.1206	0.0339559	0.319021
ENSMUSG00000045534	ENSMUSG00000045534.5	chr6:126509514-126512375	Kcna5	protein_coding	MGI:96662	0.145023	0.05921	2.4493	0.0143134	0.211708
ENSMUSG00000045589	ENSMUSG00000045589.8	chr4:56957173-56990391	Frrs1l	protein_coding	MGI:2442704	0.106846	0.0316124	3.37988	0.00072517	0.0368392
ENSMUSG00000045625	ENSMUSG00000045625.6	chr16:31752669-31764864	Pigz	protein_coding	MGI:2443822	-0.183304	0.0729641	-2.51224	0.0119966	0.193328
ENSMUSG00000045636	ENSMUSG00000045636.17	chr8:41443951-41586763	Mtus1	protein_coding	MGI:2142572	-0.0786345	0.0359707	-2.18607	0.0288103	0.298186
ENSMUSG00000045658	ENSMUSG00000045658.17	chr1:84014017-84341901	Pid1	protein_coding	MGI:2138391	0.0906241	0.0432334	2.09616	0.036068	0.325745
ENSMUSG00000045664	ENSMUSG00000045664.6	chr19:5965664-5974844	Cdc42ep2	protein_coding	MGI:1929744	-0.264361	0.0648744	-4.07496	4.60218e-05	0.00562246
ENSMUSG00000045733	ENSMUSG00000045733.8	chr7:139730541-139734790	Sprn	protein_coding	MGI:3582583	0.125903	0.0424684	2.96463	0.0030305	0.0893689
ENSMUSG00000045767	ENSMUSG00000045767.10	chr13:55840937-55851313	B230219D22Rik	protein_coding	MGI:1925771	0.108129	0.0332937	3.24773	0.00116331	0.0500957
ENSMUSG00000045777	ENSMUSG00000045777.15	chr7:141879574-141927490	Ifitm10	protein_coding	MGI:2444776	-0.138233	0.0662964	-2.08508	0.0370619	0.329453
ENSMUSG00000045813	ENSMUSG00000045813.8	chr7:61744254-61859227	Gm9801	lncRNA	MGI:3647139	0.339798	0.162814	2.08703	0.0368855
ENSMUSG00000045903	ENSMUSG00000045903.10	chr19:5034383-5040344	Npas4	protein_coding	MGI:2664186	0.138434	0.0569925	2.42899	0.0151411	0.219004
ENSMUSG00000045967	ENSMUSG00000045967.12	chr2:21372353-21835358	Gpr158	protein_coding	MGI:2441697	0.0908775	0.0398568	2.2801	0.0226017	0.261275
ENSMUSG00000046093	ENSMUSG00000046093.10	chr4:123077020-123088494	Hpcal4	protein_coding	MGI:2157521	0.166515	0.0428034	3.89022	0.000100153	0.00943831
ENSMUSG00000046160	ENSMUSG00000046160.7	chr16:91066660-91068821	Olig1	protein_coding	MGI:1355334	-0.139383	0.0436344	-3.19433	0.00140156	0.0564312
ENSMUSG00000046182	ENSMUSG00000046182.9	chr7:125477592-125681583	Gsg1l	protein_coding	MGI:2685483	0.0846152	0.0333456	2.53752	0.0111641	0.186915
ENSMUSG00000046204	ENSMUSG00000046204.15	chr14:67148619-67158472	Pnma2	protein_coding	MGI:2444129	0.0919699	0.0388641	2.36645	0.0179598	0.237365
ENSMUSG00000046280	ENSMUSG00000046280.10	chr3:89738677-89766141	She	protein_coding	MGI:1099462	-0.178578	0.0897347	-1.99006	0.0465839	0.364113
ENSMUSG00000046324	ENSMUSG00000046324.13	chr19:29585614-29625815	Ermp1	protein_coding	MGI:106250	-0.066136	0.0334171	-1.97911	0.0478041	0.368083
ENSMUSG00000046402	ENSMUSG00000046402.11	chr9:98305014-98328628	Rbp1	protein_coding	MGI:97876	0.129395	0.062719	2.0631	0.0391034	0.337141
ENSMUSG00000046442	ENSMUSG00000046442.5	chr11:87117732-87249849	Ppm1e	protein_coding	MGI:2444096	0.116184	0.0416836	2.78727	0.00531534	0.123882
ENSMUSG00000046463	ENSMUSG00000046463.6	chr10:37015398-37027311	5930403N24Rik	lncRNA	MGI:2444171	0.634432	0.280448	2.26221	0.0236844
ENSMUSG00000046470	ENSMUSG00000046470.6	chr2:181311629-181313433	Sox18	protein_coding	MGI:103559	-0.184356	0.0759096	-2.42863	0.015156	0.219004
ENSMUSG00000046500	ENSMUSG00000046500.9	chr6:96808164-97037374	Tafa4	protein_coding	MGI:2444563	-0.540069	0.209148	-2.58224	0.0098162
ENSMUSG00000046523	ENSMUSG00000046523.6	chr14:76192449-76203646	Kctd4	protein_coding	MGI:1914766	0.150817	0.0583449	2.58492	0.00974023	0.175611
ENSMUSG00000046546	ENSMUSG00000046546.4	chr16:30418541-30421615	Fam43a	protein_coding	MGI:2676309	-0.219933	0.0533464	-4.12274	3.74395e-05	0.0047921
ENSMUSG00000046607	ENSMUSG00000046607.7	chr5:118302713-118327543	Hrk	protein_coding	MGI:1201608	0.14104	0.041939	3.36298	0.000771072	0.038274
ENSMUSG00000046610	ENSMUSG00000046610.16	chr18:65831339-65884672	Oacyl	protein_coding	MGI:2442915	0.249934	0.126511	1.9756	0.0482004
ENSMUSG00000046668	ENSMUSG00000046668.10	chr18:35962450-35994741	Cxxc5	protein_coding	MGI:1914643	-0.11317	0.0366008	-3.092	0.00198813	0.0689841
ENSMUSG00000046699	ENSMUSG00000046699.15	chrX:63308491-63320602	Slitrk4	protein_coding	MGI:2442509	0.0911248	0.0406655	2.24084	0.0250365	0.276279
ENSMUSG00000046711	ENSMUSG00000046711.17	chr17:27775471-27782648	Hmga1	protein_coding	MGI:96160	-0.0875174	0.0418902	-2.08921	0.036689	0.328609
ENSMUSG00000046756	ENSMUSG00000046756.11	chr11:115494751-115498862	Mrps7	protein_coding	MGI:1354367	-0.097575	0.0430147	-2.26841	0.0233041	0.266552
ENSMUSG00000046807	ENSMUSG00000046807.11	chr10:75385957-75396164	Lrrc75b	protein_coding	MGI:2143657	-0.105659	0.0514783	-2.05251	0.0401206	0.341248
ENSMUSG00000046844	ENSMUSG00000046844.7	chr8:114932352-115100811	Vat1l	protein_coding	MGI:2142534	0.124296	0.049701	2.50087	0.012389	0.196009
ENSMUSG00000046873	ENSMUSG00000046873.19	chrX:156318367-156381711	Mbtps2	protein_coding	MGI:2444506	0.0904738	0.0424708	2.13026	0.0331502	0.315993
ENSMUSG00000046999	ENSMUSG00000046999.3	chr3:68776919-68779496	1110032F04Rik	protein_coding	MGI:1915975	0.257796	0.0806454	3.19666	0.00139027	0.0563254
ENSMUSG00000047003	ENSMUSG00000047003.16	chr15:75488528-75501676	Zfp41	protein_coding	MGI:99186	-0.123133	0.0578407	-2.12884	0.0332676	0.316113
ENSMUSG00000047205	ENSMUSG00000047205.13	chr11:3845240-3851296	Dusp18	protein_coding	MGI:1922469	0.108617	0.0473147	2.29563	0.0216969	0.25675
ENSMUSG00000047248	ENSMUSG00000047248.21	chr7:100021440-100119359	C2cd3	protein_coding	MGI:2142166	0.117079	0.0462199	2.53308	0.0113065	0.188278
ENSMUSG00000047371	ENSMUSG00000047371.8	chr7:126941967-126944761	Zfp768	protein_coding	MGI:2384582	-0.184718	0.0625589	-2.95271	0.00315	0.0910351
ENSMUSG00000047446	ENSMUSG00000047446.19	chr12:40055446-40088024	Arl4a	protein_coding	MGI:99437	0.10064	0.041164	2.44486	0.0144909	0.212943
ENSMUSG00000047496	ENSMUSG00000047496.7	chr1:105204639-105284435	Rnf152	protein_coding	MGI:2443787	-0.178703	0.0765708	-2.33382	0.019605	0.245156
ENSMUSG00000047507	ENSMUSG00000047507.13	chr17:25461633-25475338	Baiap3	protein_coding	MGI:2685783	0.151968	0.0578013	2.62914	0.00856009	0.165661
ENSMUSG00000047747	ENSMUSG00000047747.11	chr8:83589985-83817897	Rnf150	protein_coding	MGI:2443860	0.19132	0.0425633	4.49495	6.95869e-06	0.00145964
ENSMUSG00000047749	ENSMUSG00000047749.3	chr6:38264331-38276194	Zc3hav1l	protein_coding	MGI:2443387	0.15748	0.0769663	2.04609	0.0407476	0.343214
ENSMUSG00000047773	ENSMUSG00000047773.16	chr11:89281049-89732092	Ankfn1	protein_coding	MGI:2686021	0.356151	0.104899	3.39519	0.000685807	0.0355336
ENSMUSG00000047797	ENSMUSG00000047797.15	chrX:100419984-100429235	Gjb1	protein_coding	MGI:95719	-0.321271	0.0729187	-4.40589	1.05353e-05	0.00201487
ENSMUSG00000047804	ENSMUSG00000047804.16	chr11:61762133-61821078	Akap10	protein_coding	MGI:1890218	0.108178	0.0496651	2.17814	0.0293957	0.299175
ENSMUSG00000047810	ENSMUSG00000047810.10	chr19:6821991-6835579	Ccdc88b	protein_coding	MGI:1925567	-0.198617	0.0843362	-2.35506	0.0185196	0.238046
ENSMUSG00000047842	ENSMUSG00000047842.8	chr13:52658416-52685315	Diras2	protein_coding	MGI:1915453	0.067138	0.0322094	2.08442	0.037122	0.329619
ENSMUSG00000047935	ENSMUSG00000047935.18	chr8:12435771-12486768	Sox1ot	lncRNA	MGI:3645522	0.185407	0.0567928	3.26462	0.00109613	0.0481593
ENSMUSG00000047959	ENSMUSG00000047959.5	chr3:106943485-106945386	Kcna3	protein_coding	MGI:96660	0.327492	0.0832814	3.93236	8.41167e-05	0.0083409
ENSMUSG00000047996	ENSMUSG00000047996.17	chrX:77493219-77627502	Prrg1	protein_coding	MGI:1917364	-0.141847	0.0700225	-2.02574	0.0427919	0.352221
ENSMUSG00000048022	ENSMUSG00000048022.12	chr6:24951140-24956296	Tmem229a	protein_coding	MGI:2442812	-0.165541	0.0389785	-4.24698	2.16673e-05	0.00320209
ENSMUSG00000048058	ENSMUSG00000048058.18	chr2:101780548-102016730	Ldlrad3	protein_coding	MGI:2138856	-0.106894	0.049058	-2.17892	0.0293374	0.299175
ENSMUSG00000048100	ENSMUSG00000048100.14	chr3:108479014-108490538	Taf13	protein_coding	MGI:1913500	-0.123949	0.0554666	-2.23467	0.025439	0.277644
ENSMUSG00000048138	ENSMUSG00000048138.11	chr19:25649775-25656355	Dmrt2	protein_coding	MGI:1330307	0.788525	0.329905	2.39016	0.016841
ENSMUSG00000048163	ENSMUSG00000048163.14	chr5:113956597-113970705	Selplg	protein_coding	MGI:106689	-0.0901355	0.0439535	-2.0507	0.0402961	0.341742
ENSMUSG00000048277	ENSMUSG00000048277.16	chr11:117700494-117705109	Syngr2	protein_coding	MGI:1328324	-0.200002	0.0611404	-3.27119	0.00107097	0.0480274
ENSMUSG00000048349	ENSMUSG00000048349.10	chr14:104699112-104705435	Pou4f1	protein_coding	MGI:102525	-0.577385	0.195631	-2.9514	0.00316342
ENSMUSG00000048376	ENSMUSG00000048376.7	chr13:95738311-95754995	F2r	protein_coding	MGI:101802	-0.195847	0.0835742	-2.34338	0.0191097	0.241283
ENSMUSG00000048387	ENSMUSG00000048387.9	chr12:9620116-9631500	Osr1	protein_coding	MGI:1344424	0.584357	0.266087	2.19611	0.0280841
ENSMUSG00000048388	ENSMUSG00000048388.4	chr2:83642980-83713830	Fam171b	protein_coding	MGI:2444579	0.0804811	0.0284781	2.82607	0.00471228	0.116905
ENSMUSG00000048490	ENSMUSG00000048490.15	chr16:76084288-76170715	Nrip1	protein_coding	MGI:1315213	0.0929293	0.0456562	2.03542	0.0418091	0.347866
ENSMUSG00000048537	ENSMUSG00000048537.17	chr9:44597601-44646495	Phldb1	protein_coding	MGI:2143230	-0.146902	0.0398665	-3.68485	0.000228833	0.0172022
ENSMUSG00000048550	ENSMUSG00000048550.18	chr2:21210535-21219820	Thnsl1	protein_coding	MGI:2139347	0.107874	0.0474598	2.27296	0.0230286	0.264932
ENSMUSG00000048581	ENSMUSG00000048581.13	chr3:63822105-63836893	E130311K13Rik	protein_coding	MGI:3607716	0.159018	0.0708143	2.24557	0.0247316	0.275626
ENSMUSG00000048707	ENSMUSG00000048707.10	chr2:25152630-25159897	Tprn	protein_coding	MGI:2139535	-0.162139	0.0486511	-3.33269	0.000860114	0.0414288
ENSMUSG00000048721	ENSMUSG00000048721.3	chr11:46126358-46130699	Fndc9	protein_coding	MGI:2443410	0.157663	0.0661682	2.38276	0.0171832	0.232594
ENSMUSG00000048732	ENSMUSG00000048732.6	chr11:100353440-100363567	Klhl11	protein_coding	MGI:2388648	0.174195	0.0576105	3.02367	0.00249725	0.0786363
ENSMUSG00000048758	ENSMUSG00000048758.15	chr9:106306653-106308767	Rpl29	protein_coding	MGI:99687	-0.06876	0.0307613	-2.23528	0.025399	0.277575
ENSMUSG00000048782	ENSMUSG00000048782.17	chr7:114342929-114449618	Insc	protein_coding	MGI:1917942	-0.174379	0.0755622	-2.30776	0.0210127	0.25163
ENSMUSG00000048895	ENSMUSG00000048895.14	chr11:80367849-80372010	Cdk5r1	protein_coding	MGI:101764	0.0595669	0.029046	2.05078	0.0402885	0.341742
ENSMUSG00000049107	ENSMUSG00000049107.14	chr6:126078375-126143873	Ntf3	protein_coding	MGI:97380	0.965472	0.452027	2.13587	0.0326899
ENSMUSG00000049119	ENSMUSG00000049119.15	chr4:5644090-6108223	Fam110b	protein_coding	MGI:1916593	0.0765631	0.0381959	2.00449	0.045018	0.358737
ENSMUSG00000049148	ENSMUSG00000049148.9	chr15:4404973-4605035	Plcxd3	protein_coding	MGI:2442605	0.301874	0.0994437	3.03562	0.00240038	0.0774277
ENSMUSG00000049265	ENSMUSG00000049265.9	chr5:30745514-30782615	Kcnk3	protein_coding	MGI:1100509	-0.156545	0.063452	-2.46713	0.0136199	0.207392
ENSMUSG00000049281	ENSMUSG00000049281.17	chr9:40180513-40202914	Scn3b	protein_coding	MGI:1918882	0.148104	0.0422179	3.50809	0.000451337	0.0262037
ENSMUSG00000049420	ENSMUSG00000049420.10	chr10:25788229-25954950	Tmem200a	protein_coding	MGI:1924470	0.236614	0.0897851	2.63534	0.00840527	0.164394
ENSMUSG00000049439	ENSMUSG00000049439.14	chr1:60382482-60427219	Cyp20a1	protein_coding	MGI:1925201	-0.14589	0.0572571	-2.54798	0.010835	0.18492
ENSMUSG00000049470	ENSMUSG00000049470.14	chr11:53241660-53312657	Aff4	protein_coding	MGI:2136171	0.0882922	0.0437236	2.01933	0.0434532	0.353261
ENSMUSG00000049493	ENSMUSG00000049493.14	chr9:95634695-95727364	Pls1	protein_coding	MGI:104809	-0.205652	0.05477	-3.75483	0.000173461	0.0143686
ENSMUSG00000049521	ENSMUSG00000049521.3	chr15:78726824-78735097	Cdc42ep1	protein_coding	MGI:1929763	-0.248017	0.0534012	-4.64441	3.41052e-06	0.000943699
ENSMUSG00000049550	ENSMUSG00000049550.18	chr5:123715858-123822681	Clip1	protein_coding	MGI:1928401	0.0789496	0.0330527	2.3886	0.0169127	0.230389
ENSMUSG00000049556	ENSMUSG00000049556.6	chr9:56525759-56703752	Lingo1	protein_coding	MGI:1915522	0.121372	0.0376537	3.22338	0.00126687	0.0527809
ENSMUSG00000049606	ENSMUSG00000049606.17	chr5:106764605-106845153	Zfp644	protein_coding	MGI:1277212	0.0837887	0.0387491	2.16234	0.0305919	0.303452
ENSMUSG00000049624	ENSMUSG00000049624.15	chr9:78443770-78495323	Slc17a5	protein_coding	MGI:1924105	0.105025	0.0509453	2.06153	0.0392528	0.337141
ENSMUSG00000049709	ENSMUSG00000049709.5	chr7:108521059-108529385	Nlrp10	protein_coding	MGI:2444084	0.387148	0.189181	2.04644	0.0407128
ENSMUSG00000049721	ENSMUSG00000049721.15	chr11:3933636-3949326	Gal3st1	protein_coding	MGI:1858277	-0.225598	0.058541	-3.85367	0.000116362	0.0105824
ENSMUSG00000049804	ENSMUSG00000049804.10	chrX:133587268-133597506	Armcx4	protein_coding	MGI:2147887	0.119589	0.0354398	3.37442	0.000739718	0.0374321
ENSMUSG00000049807	ENSMUSG00000049807.17	chr11:97306359-97393228	Arhgap23	protein_coding	MGI:3697726	-0.0709262	0.0309288	-2.29321	0.0218359	0.257152
ENSMUSG00000049858	ENSMUSG00000049858.9	chr10:128505763-128509942	Suox	protein_coding	MGI:2446117	-0.115527	0.053901	-2.14332	0.0320876	0.310953
ENSMUSG00000049872	ENSMUSG00000049872.9	chr10:33963811-33972515	Calhm5	protein_coding	MGI:2143897	0.191968	0.0912717	2.10326	0.0354432	0.324527
ENSMUSG00000049878	ENSMUSG00000049878.14	chr4:121002570-121072281	Rlf	protein_coding	MGI:1924705	0.08876	0.0408846	2.17099	0.029932	0.301689
ENSMUSG00000050063	ENSMUSG00000050063.19	chr7:43473923-43481454	Klk6	protein_coding	MGI:1343166	-0.493041	0.0915751	-5.384	7.28472e-08	6.76699e-05
ENSMUSG00000050069	ENSMUSG00000050069.4	chr1:174661351-174749385	Grem2	protein_coding	MGI:1344367	0.149889	0.0403268	3.71687	0.000201708	0.0158983
ENSMUSG00000050074	ENSMUSG00000050074.13	chr9:109641348-109655701	Spink8	protein_coding	MGI:1925959	0.497233	0.212516	2.33974	0.0192969
ENSMUSG00000050121	ENSMUSG00000050121.10	chr19:41050149-41065552	Opalin	protein_coding	MGI:2657025	-0.210773	0.056192	-3.75094	0.000176172	0.0144314
ENSMUSG00000050240	ENSMUSG00000050240.17	chr16:17051436-17081294	Hic2	protein_coding	MGI:1929869	0.139087	0.0672621	2.06783	0.0386557	0.337141
ENSMUSG00000050370	ENSMUSG00000050370.6	chr19:34451178-34452564	Ch25h	protein_coding	MGI:1333869	0.692728	0.349936	1.97959	0.0477501
ENSMUSG00000050511	ENSMUSG00000050511.2	chr4:131838037-131871797	Oprd1	protein_coding	MGI:97438	0.133091	0.0514092	2.58885	0.00962968	0.174908
ENSMUSG00000050530	ENSMUSG00000050530.15	chr2:3115261-3228843	Fam171a1	protein_coding	MGI:2442917	0.0834035	0.032427	2.57204	0.0101102	0.178888
ENSMUSG00000050552	ENSMUSG00000050552.9	chr5:138253744-138257660	Lamtor4	protein_coding	MGI:1913346	-0.0887332	0.0443699	-1.99985	0.0455164	0.360939
ENSMUSG00000050627	ENSMUSG00000050627.14	chr9:114728409-114763055	Gpd1l	protein_coding	MGI:1289257	0.100412	0.0291239	3.44776	0.000565261	0.0306301
ENSMUSG00000050708	ENSMUSG00000050708.17	chr7:45107368-45109308	Ftl1	protein_coding	MGI:95589	-0.0579904	0.0255329	-2.2712	0.0231347	0.265081
ENSMUSG00000050711	ENSMUSG00000050711.8	chr1:79412386-79417837	Scg2	protein_coding	MGI:103033	0.0805397	0.040832	1.97247	0.0485565	0.370803
ENSMUSG00000050821	ENSMUSG00000050821.15	chr16:20511991-20521798	Fam131a	protein_coding	MGI:1925658	0.106064	0.0392845	2.69989	0.00693618	0.149099
ENSMUSG00000050830	ENSMUSG00000050830.18	chr11:11064223-11218931	Vwc2	protein_coding	MGI:2442987	-0.174712	0.0834531	-2.09353	0.0363017	0.326263
ENSMUSG00000050854	ENSMUSG00000050854.10	chr4:118398138-118401241	Tmem125	protein_coding	MGI:1923409	-0.230448	0.0699841	-3.29286	0.000991726	0.0457355
ENSMUSG00000050910	ENSMUSG00000050910.6	chr11:115272742-115286958	Cdr2l	protein_coding	MGI:2684867	-0.12675	0.0490292	-2.58519	0.00973254	0.175611
ENSMUSG00000050953	ENSMUSG00000050953.11	chr10:56253426-56278609	Gja1	protein_coding	MGI:95713	-0.0785753	0.0334802	-2.34692	0.0189292	0.240404
ENSMUSG00000050967	ENSMUSG00000050967.6	chr1:39657574-39690642	Creg2	protein_coding	MGI:1928333	0.165794	0.0398224	4.16334	3.1363e-05	0.00420491
ENSMUSG00000051007	ENSMUSG00000051007.16	chr7:140987707-140994049	Gatd1	protein_coding	MGI:2387178	-0.115711	0.0430906	-2.6853	0.00724648	0.152246
ENSMUSG00000051041	ENSMUSG00000051041.9	chr7:107166653-107190301	Olfml1	protein_coding	MGI:2679264	-0.171927	0.0562833	-3.05467	0.00225308	0.0740374
ENSMUSG00000051146	ENSMUSG00000051146.4	chr16:20437965-20440037	Camk2n2	protein_coding	MGI:1920297	-0.113837	0.0477728	-2.38289	0.0171775	0.232594
ENSMUSG00000051159	ENSMUSG00000051159.17	chrX:101290987-101295787	Cited1	protein_coding	MGI:108023	-0.319844	0.159784	-2.00172	0.0453146
ENSMUSG00000051401	ENSMUSG00000051401.8	chr18:40390015-40664683	Kctd16	protein_coding	MGI:1914659	0.21884	0.062742	3.48794	0.000486759	0.0276433
ENSMUSG00000051527	ENSMUSG00000051527.12	chr7:6733577-6970218	Usp29	protein_coding	MGI:1888998	0.0929198	0.0456953	2.03346	0.0420057	0.348694
ENSMUSG00000051557	ENSMUSG00000051557.16	chr4:155972336-155976238	Pusl1	protein_coding	MGI:3047787	-0.122447	0.0579968	-2.11127	0.0347491	0.320733
ENSMUSG00000051674	ENSMUSG00000051674.16	chr5:73638343-73718137	Dcun1d4	protein_coding	MGI:2140972	0.105243	0.0325231	3.23595	0.0012124	0.0515272
ENSMUSG00000051726	ENSMUSG00000051726.7	chr12:17222101-17226889	Kcnf1	protein_coding	MGI:2687399	0.151317	0.0527702	2.86746	0.00413776	0.109756
ENSMUSG00000051855	ENSMUSG00000051855.16	chr6:30723546-30748464	Mest	protein_coding	MGI:96968	0.15587	0.0686275	2.27124	0.0231322	0.265081
ENSMUSG00000051890	ENSMUSG00000051890.14	chr12:69287950-69331406	Klhdc1	protein_coding	MGI:2672853	0.124426	0.0570064	2.18266	0.0290605	0.299175
ENSMUSG00000051920	ENSMUSG00000051920.8	chr15:42884190-43034222	Rspo2	protein_coding	MGI:1922667	0.433525	0.179005	2.42186	0.0154413	0.221997
ENSMUSG00000051951	ENSMUSG00000051951.6	chr1:3276124-3741721	Xkr4	protein_coding	MGI:3528744	0.244259	0.108282	2.25577	0.0240848	0.271659
ENSMUSG00000051985	ENSMUSG00000051985.13	chr1:135881316-135934080	Igfn1	protein_coding	MGI:3045352	0.748298	0.168238	4.44786	8.67291e-06	0.00170896
ENSMUSG00000052087	ENSMUSG00000052087.15	chr13:55517545-55532500	Rgs14	protein_coding	MGI:1859709	0.121917	0.0381518	3.19558	0.00139551	0.056362
ENSMUSG00000052133	ENSMUSG00000052133.17	chr16:35361515-35485102	Sema5b	protein_coding	MGI:107555	0.0999432	0.0445586	2.24296	0.0248994	0.276059
ENSMUSG00000052144	ENSMUSG00000052144.9	chr6:100810583-100846895	Ppp4r2	protein_coding	MGI:3027896	0.0905344	0.0334642	2.70541	0.00682193	0.14836
ENSMUSG00000052151	ENSMUSG00000052151.13	chr10:79362264-79369630	Plpp2	protein_coding	MGI:1354945	-0.274745	0.0865003	-3.17623	0.00149201	0.0586211
ENSMUSG00000052155	ENSMUSG00000052155.6	chr2:48704121-48793281	Acvr2a	protein_coding	MGI:102806	0.140615	0.0502791	2.79669	0.00516298	0.122751
ENSMUSG00000052229	ENSMUSG00000052229.6	chr18:32076050-32082689	Gpr17	protein_coding	MGI:3584514	-0.0889699	0.0385354	-2.30878	0.0209557	0.25153
ENSMUSG00000052298	ENSMUSG00000052298.13	chr11:54608282-54678501	Cdc42se2	protein_coding	MGI:1919979	0.0882716	0.0323158	2.73153	0.00630403	0.141067
ENSMUSG00000052301	ENSMUSG00000052301.15	chr7:126446588-126451877	Doc2a	protein_coding	MGI:109446	0.180942	0.0781878	2.31419	0.0206571	0.250368
ENSMUSG00000052459	ENSMUSG00000052459.14	chr16:43905765-43960068	Atp6v1a	protein_coding	MGI:1201780	0.0844232	0.0268103	3.14891	0.00163881	0.0624457
ENSMUSG00000052544	ENSMUSG00000052544.10	chr3:152903903-153430811	St6galnac3	protein_coding	MGI:1341828	-0.125653	0.0606613	-2.07138	0.0383232	0.335618
ENSMUSG00000052560	ENSMUSG00000052560.16	chr15:90371685-90563635	Cpne8	protein_coding	MGI:1914121	0.125008	0.0620162	2.01573	0.0438284	0.35447
ENSMUSG00000052581	ENSMUSG00000052581.14	chr6:79995860-80787124	Lrrtm4	protein_coding	MGI:2389180	0.121531	0.056077	2.16721	0.0302185	0.302534
ENSMUSG00000052609	ENSMUSG00000052609.10	chr12:76577665-76627262	Plekhg3	protein_coding	MGI:2388284	-0.149686	0.0446357	-3.3535	0.000797967	0.039087
ENSMUSG00000052730	ENSMUSG00000052730.8	chr6:48566379-48567518	Gm5111	lncRNA	MGI:3645688	-0.396974	0.182283	-2.17779	0.0294216
ENSMUSG00000052837	ENSMUSG00000052837.8	chr8:85701113-85705347	Junb	protein_coding	MGI:96647	0.27352	0.0887823	3.0808	0.00206448	0.0708777
ENSMUSG00000052848	ENSMUSG00000052848.8	chr5:111729288-111752798	C130026L21Rik	lncRNA	MGI:3041189	0.211596	0.106635	1.9843	0.0472225	0.366426
ENSMUSG00000052914	ENSMUSG00000052914.5	chr4:96404375-96441898	Cyp2j6	protein_coding	MGI:1270148	-0.151722	0.0467148	-3.24784	0.00116285	0.0500957
ENSMUSG00000052917	ENSMUSG00000052917.16	chr16:55868701-56010375	Senp7	protein_coding	MGI:1913565	0.0861486	0.0395628	2.17752	0.0294422	0.299175
ENSMUSG00000053007	ENSMUSG00000053007.10	chr6:53264255-53677361	Creb5	protein_coding	MGI:2443973	-0.214922	0.0940653	-2.28481	0.0223237	0.259083
ENSMUSG00000053012	ENSMUSG00000053012.18	chr6:71248661-71262303	Krcc1	protein_coding	MGI:1889377	-0.118925	0.0536446	-2.2169	0.02663	0.284168
ENSMUSG00000053024	ENSMUSG00000053024.15	chr1:132437165-132470994	Cntn2	protein_coding	MGI:104518	-0.167943	0.0438926	-3.82622	0.000130127	0.0114741
ENSMUSG00000053025	ENSMUSG00000053025.14	chr7:74764642-74959010	Sv2b	protein_coding	MGI:1927338	0.214224	0.0509226	4.20685	2.58955e-05	0.0037419
ENSMUSG00000053128	ENSMUSG00000053128.16	chr9:44006928-44024814	Rnf26	protein_coding	MGI:2388131	-0.143394	0.0666526	-2.15137	0.0314472	0.308007
ENSMUSG00000053279	ENSMUSG00000053279.9	chr19:20470079-20620829	Aldh1a1	protein_coding	MGI:1353450	-0.215258	0.0593657	-3.62597	0.000287875	0.0187323
ENSMUSG00000053395	ENSMUSG00000053395.16	chr7:3439199-3464164	Cacng8	protein_coding	MGI:1932376	0.0915376	0.0343078	2.66812	0.00762764	0.156216
ENSMUSG00000053398	ENSMUSG00000053398.12	chr3:98220486-98247306	Phgdh	protein_coding	MGI:1355330	-0.108446	0.0367802	-2.94849	0.00319329	0.0916648
ENSMUSG00000053465	ENSMUSG00000053465.7	chr14:119375753-120107227	Hs6st3	protein_coding	MGI:1354960	0.241212	0.0757135	3.18586	0.00144326	0.0577526
ENSMUSG00000053475	ENSMUSG00000053475.6	chr2:51928021-51946698	Tnfaip6	protein_coding	MGI:1195266	-0.169517	0.0542494	-3.12478	0.0017794	0.0657417
ENSMUSG00000053550	ENSMUSG00000053550.14	chr7:4828551-4847695	Shisa7	protein_coding	MGI:3605641	0.108832	0.0362565	3.00173	0.00268448	0.0827289
ENSMUSG00000053825	ENSMUSG00000053825.16	chr10:106306200-106771813	Ppfia2	protein_coding	MGI:2443834	0.121056	0.0389016	3.11184	0.00185922	0.0669785
ENSMUSG00000053846	ENSMUSG00000053846.6	chr18:75072393-75094334	Lipg	protein_coding	MGI:1341803	0.245088	0.119881	2.04443	0.0409108
ENSMUSG00000053931	ENSMUSG00000053931.12	chr3:121220146-121251856	Cnn3	protein_coding	MGI:1919244	-0.0807653	0.0333902	-2.41883	0.0155703	0.223009
ENSMUSG00000053963	ENSMUSG00000053963.8	chr1:180259952-180311069	Stum	protein_coding	MGI:2138735	0.162886	0.0500631	3.25362	0.00113944	0.0493948
ENSMUSG00000054027	ENSMUSG00000054027.9	chr10:86614869-86674253	Nt5dc3	protein_coding	MGI:3513266	0.0778509	0.0342455	2.27332	0.0230069	0.264932
ENSMUSG00000054226	ENSMUSG00000054226.14	chr6:85888847-85907266	Tprkb	protein_coding	MGI:1917036	-0.0777006	0.0379707	-2.04633	0.0407242	0.343214
ENSMUSG00000054263	ENSMUSG00000054263.13	chr15:7120095-7226970	Lifr	protein_coding	MGI:96788	-0.129335	0.0617071	-2.09595	0.0360865	0.325745
ENSMUSG00000054409	ENSMUSG00000054409.6	chr15:43728042-43733432	Tmem74	protein_coding	MGI:2443417	0.161647	0.0681248	2.37281	0.0176532	0.235535
ENSMUSG00000054453	ENSMUSG00000054453.12	chrX:9751861-9860782	Sytl5	protein_coding	MGI:2668451	0.226224	0.0918744	2.46231	0.0138044	0.208751
ENSMUSG00000054619	ENSMUSG00000054619.8	chr15:100202021-100226543	Mettl7a1	protein_coding	MGI:1916523	-0.0988153	0.0428328	-2.307	0.0210548	0.251902
ENSMUSG00000054708	ENSMUSG00000054708.18	chr10:81464374-81483444	Ankrd24	protein_coding	MGI:1890394	-0.111854	0.0455914	-2.45341	0.0141508	0.210322
ENSMUSG00000054728	ENSMUSG00000054728.18	chr13:42834099-43292002	Phactr1	protein_coding	MGI:2659021	0.0809813	0.0341921	2.36842	0.0178642	0.236824
ENSMUSG00000054793	ENSMUSG00000054793.9	chr7:24181448-24203964	Cadm4	protein_coding	MGI:2449088	-0.0700676	0.0289441	-2.42079	0.0154867	0.222056
ENSMUSG00000054814	ENSMUSG00000054814.15	chr5:74159114-74229092	Usp46	protein_coding	MGI:1916977	0.0924687	0.0324321	2.85115	0.00435616	0.110955
ENSMUSG00000054843	ENSMUSG00000054843.10	chr19:57599466-58121775	Atrnl1	protein_coding	MGI:2147749	0.0697146	0.0352108	1.97992	0.0477123	0.367871
ENSMUSG00000054939	ENSMUSG00000054939.7	chr16:3665132-3676744	Zfp174	protein_coding	MGI:2686600	0.157175	0.0655663	2.39719	0.0165212	0.22955
ENSMUSG00000054944	ENSMUSG00000054944.8	chr13:97870006-97883919	5330416C01Rik	lncRNA	MGI:2685378	0.497081	0.202248	2.45779	0.0139797
ENSMUSG00000054976	ENSMUSG00000054976.15	chr1:81054667-81319479	Nyap2	protein_coding	MGI:2443135	0.142282	0.0479686	2.96614	0.00301562	0.0893689
ENSMUSG00000055027	ENSMUSG00000055027.18	chr6:71190924-71299217	Smyd1	protein_coding	MGI:104790	-0.31002	0.114109	-2.71687	0.00659032	0.145083
ENSMUSG00000055078	ENSMUSG00000055078.8	chr7:57057420-57159807	Gabra5	protein_coding	MGI:95617	0.157668	0.0398581	3.95573	7.63019e-05	0.00800247
ENSMUSG00000055172	ENSMUSG00000055172.11	chr6:124489364-124500402	C1ra	protein_coding	MGI:1355313	-0.438193	0.188954	-2.31905	0.0203923
ENSMUSG00000055320	ENSMUSG00000055320.19	chr7:112278525-112506014	Tead1	protein_coding	MGI:101876	0.127815	0.0480455	2.66028	0.00780753	0.159149
ENSMUSG00000055523	ENSMUSG00000055523.8	chr19:55186531-55229668	Gucy2g	protein_coding	MGI:106025	0.279133	0.105582	2.64374	0.00819957	0.163301
ENSMUSG00000055538	ENSMUSG00000055538.8	chr14:25712066-25769463	Zcchc24	protein_coding	MGI:1919168	-0.0875373	0.0349817	-2.50237	0.0123363	0.196009
ENSMUSG00000055553	ENSMUSG00000055553.17	chr8:70960922-70980606	Kxd1	protein_coding	MGI:1922870	-0.0881991	0.0427218	-2.0645	0.0389705	0.337141
ENSMUSG00000055675	ENSMUSG00000055675.7	chr8:15061025-15083333	Kbtbd11	protein_coding	MGI:1922151	0.0878636	0.0408557	2.15058	0.0315091	0.308007
ENSMUSG00000055717	ENSMUSG00000055717.14	chr14:103887664-103942343	Slain1	protein_coding	MGI:2145578	-0.129533	0.0418949	-3.09185	0.00198916	0.0689841
ENSMUSG00000055725	ENSMUSG00000055725.12	chr5:97230188-97259455	Paqr3	protein_coding	MGI:2679683	0.116727	0.0579528	2.01418	0.043991	0.355047
ENSMUSG00000055761	ENSMUSG00000055761.15	chr4:20118874-20778866	Nkain3	protein_coding	MGI:2444830	0.222416	0.0897037	2.47945	0.0131586	0.202999
ENSMUSG00000055839	ENSMUSG00000055839.7	chr17:24043712-24048110	Elob	protein_coding	MGI:1914923	-0.0708651	0.0330978	-2.14108	0.0322673	0.311534
ENSMUSG00000055945	ENSMUSG00000055945.9	chr17:8556291-8562945	Prr18	protein_coding	MGI:2443403	-0.210982	0.0404117	-5.22082	1.78137e-07	0.000115834
ENSMUSG00000056145	ENSMUSG00000056145.6	chr3:106946820-106961663	AI504432	lncRNA	MGI:2139742	0.109998	0.0519469	2.11751	0.0342167	0.319236
ENSMUSG00000056211	ENSMUSG00000056211.14	chr1:128031038-128165473	R3hdm1	protein_coding	MGI:2448514	0.088618	0.0375837	2.35789	0.0183794	0.238046
ENSMUSG00000056215	ENSMUSG00000056215.15	chr6:34006379-34110969	Lrguk	protein_coding	MGI:1921604	0.307711	0.0969608	3.17357	0.00150579	0.0589843
ENSMUSG00000056296	ENSMUSG00000056296.18	chr14:8853423-9184983	Synpr	protein_coding	MGI:1919253	0.109693	0.0414486	2.64649	0.00813325	0.162906
ENSMUSG00000056367	ENSMUSG00000056367.15	chr5:25964995-26055686	Actr3b	protein_coding	MGI:2661120	0.0734132	0.0295829	2.48161	0.013079	0.202278
ENSMUSG00000056427	ENSMUSG00000056427.11	chr11:35012051-35599334	Slit3	protein_coding	MGI:1315202	0.149703	0.0535803	2.79399	0.00520618	0.123102
ENSMUSG00000056515	ENSMUSG00000056515.10	chr17:65958724-66079747	Rab31	protein_coding	MGI:1914603	-0.088861	0.0311253	-2.85494	0.00430445	0.11078
ENSMUSG00000056553	ENSMUSG00000056553.15	chr12:116449340-117240469	Ptprn2	protein_coding	MGI:107418	0.116304	0.0346812	3.35351	0.000797942	0.039087
ENSMUSG00000056629	ENSMUSG00000056629.17	chr19:6955109-6957869	Fkbp2	protein_coding	MGI:95542	-0.0841133	0.041322	-2.03556	0.0417949	0.347866
ENSMUSG00000056656	ENSMUSG00000056656.7	chr15:77631998-77641203	Apol8	protein_coding	MGI:2444921	-0.218449	0.0951968	-2.29471	0.0217498	0.256945
ENSMUSG00000056665	ENSMUSG00000056665.3	chr15:74593053-74596488	Them6	protein_coding	MGI:1925301	-0.0868548	0.0429015	-2.02452	0.042917	0.352803
ENSMUSG00000056771	ENSMUSG00000056771.8	chr6:128164781-128177586	Gm10010	lncRNA	MGI:3641978	0.245967	0.0828064	2.97038	0.00297429	0.0892
ENSMUSG00000056820	ENSMUSG00000056820.8	chr8:125739736-125760931	Tsnax	protein_coding	MGI:1855672	0.0787596	0.0309334	2.5461	0.0108934	0.185012
ENSMUSG00000056854	ENSMUSG00000056854.5	chrX:109857886-109860813	Pou3f4	protein_coding	MGI:101894	0.101761	0.0430643	2.363	0.0181275	0.238046
ENSMUSG00000056947	ENSMUSG00000056947.6	chr3:55689931-55692422	Mab21l1	protein_coding	MGI:1333773	-1.27329	0.296844	-4.28943	1.79128e-05
ENSMUSG00000056966	ENSMUSG00000056966.8	chr5:137951723-137961360	Gjc3	protein_coding	MGI:2153041	-0.163317	0.0436749	-3.73938	0.000184476	0.0147185
ENSMUSG00000057101	ENSMUSG00000057101.9	chr7:23781349-23807138	Zfp180	protein_coding	MGI:1923701	0.0692514	0.0335208	2.06592	0.0388358	0.337141
ENSMUSG00000057134	ENSMUSG00000057134.7	chr10:67380341-67384898	Ado	protein_coding	MGI:2685083	-0.105941	0.0314402	-3.3696	0.000752772	0.037945
ENSMUSG00000057182	ENSMUSG00000057182.16	chr2:65287462-65397971	Scn3a	protein_coding	MGI:98249	0.126486	0.0392552	3.22214	0.00127235	0.0527809
ENSMUSG00000057230	ENSMUSG00000057230.15	chr6:86826499-86980205	Aak1	protein_coding	MGI:1098687	0.0778212	0.0377907	2.05927	0.0394687	0.337965
ENSMUSG00000057280	ENSMUSG00000057280.16	chr4:58285960-58374303	Musk	protein_coding	MGI:103581	0.227361	0.0770482	2.95089	0.00316855	0.0911729
ENSMUSG00000057329	ENSMUSG00000057329.8	chr1:106465908-106642004	Bcl2	protein_coding	MGI:88138	0.0973965	0.0451034	2.1594	0.0308188	0.304558
ENSMUSG00000057457	ENSMUSG00000057457.12	chrX:155945071-156198308	Phex	protein_coding	MGI:107489	0.300778	0.123144	2.4425	0.014586	0.213857
ENSMUSG00000057554	ENSMUSG00000057554.14	chr13:12454296-12479825	Lgals8	protein_coding	MGI:1928481	-0.0836523	0.042241	-1.98036	0.0476634	0.367871
ENSMUSG00000057715	ENSMUSG00000057715.14	chr1:11484329-12046125	A830018L16Rik	protein_coding	MGI:2444149	0.0789853	0.0330291	2.39138	0.016785	0.230389
ENSMUSG00000057716	ENSMUSG00000057716.8	chr6:39848395-40232084	Tmem178b	protein_coding	MGI:3647581	0.17734	0.0549722	3.226	0.00125535	0.0526638
ENSMUSG00000057863	ENSMUSG00000057863.7	chr17:56920416-56921243	Rpl36	protein_coding	MGI:1860603	-0.0792546	0.0338879	-2.33873	0.0193495	0.243322
ENSMUSG00000057982	ENSMUSG00000057982.9	chr9:22137010-22154650	Zfp809	protein_coding	MGI:2143362	0.107009	0.0510174	2.09751	0.0359486	0.325566
ENSMUSG00000058248	ENSMUSG00000058248.13	chr1:191873082-192192467	Kcnh1	protein_coding	MGI:1341721	0.130867	0.0474993	2.75514	0.00586666	0.13288
ENSMUSG00000058441	ENSMUSG00000058441.8	chr15:88943937-88957770	Panx2	protein_coding	MGI:1890615	-0.0992476	0.0374971	-2.64681	0.00812553	0.162906
ENSMUSG00000058626	ENSMUSG00000058626.17	chr17:45941130-45970251	Capn11	protein_coding	MGI:1352490	1.13898	0.550956	2.06728	0.0387078
ENSMUSG00000058656	ENSMUSG00000058656.14	chr15:53317206-53765933	Samd12	protein_coding	MGI:2444518	0.200415	0.0479193	4.18234	2.88522e-05	0.00403465
ENSMUSG00000058835	ENSMUSG00000058835.15	chr2:22830085-22930253	Abi1	protein_coding	MGI:104913	0.0800866	0.0339545	2.35864	0.0183418	0.238046
ENSMUSG00000059149	ENSMUSG00000059149.18	chr1:131950544-131995800	Mfsd4a	protein_coding	MGI:2442786	0.131208	0.057442	2.28418	0.0223609	0.259083
ENSMUSG00000059173	ENSMUSG00000059173.20	chr2:79664797-79959802	Pde1a	protein_coding	MGI:1201792	0.232245	0.0563448	4.12184	3.75851e-05	0.0047921
ENSMUSG00000059187	ENSMUSG00000059187.13	chr6:96090135-96634159	Tafa1	protein_coding	MGI:2443695	0.242134	0.121262	1.99678	0.0458486	0.362552
ENSMUSG00000059213	ENSMUSG00000059213.8	chr15:98701658-98707371	Ddn	protein_coding	MGI:108101	0.08404	0.0410663	2.04645	0.0407125	0.343214
ENSMUSG00000059246	ENSMUSG00000059246.5	chr9:69664992-69668222	Foxb1	protein_coding	MGI:1927549	-1.29252	0.475901	-2.71595	0.00660869
ENSMUSG00000059263	ENSMUSG00000059263.10	chr7:111622711-111710868	Usp47	protein_coding	MGI:1922246	0.0840682	0.0330266	2.54547	0.0109131	0.185039
ENSMUSG00000059336	ENSMUSG00000059336.15	chr18:78143306-78185334	Slc14a1	protein_coding	MGI:1351654	-0.20434	0.0623608	-3.27674	0.00105012	0.0474194
ENSMUSG00000059447	ENSMUSG00000059447.14	chr5:30360246-30389591	Hadhb	protein_coding	MGI:2136381	-0.0791982	0.0373666	-2.11949	0.034049	0.319021
ENSMUSG00000059456	ENSMUSG00000059456.14	chr14:66390706-66518501	Ptk2b	protein_coding	MGI:104908	0.122363	0.031191	3.92302	8.74476e-05	0.00842411
ENSMUSG00000059602	ENSMUSG00000059602.15	chr10:85890989-86334760	Syn3	protein_coding	MGI:1351334	0.229265	0.0720612	3.18153	0.001465	0.0580862
ENSMUSG00000059674	ENSMUSG00000059674.8	chr14:54868688-54878821	Cdh24	protein_coding	MGI:1928330	-0.184098	0.076869	-2.39495	0.0166226	0.230063
ENSMUSG00000059810	ENSMUSG00000059810.19	chr4:62478084-62622238	Rgs3	protein_coding	MGI:1354734	-0.145318	0.0614013	-2.3667	0.0179476	0.237365
ENSMUSG00000060126	ENSMUSG00000060126.15	chr14:76082533-76085965	Tpt1	protein_coding	MGI:104890	-0.0735186	0.0299306	-2.4563	0.0140375	0.209383
ENSMUSG00000060227	ENSMUSG00000060227.16	chr2:121697451-121766701	Golm2	protein_coding	MGI:2443129	0.0700688	0.0321289	2.18087	0.0291933	0.299175
ENSMUSG00000060240	ENSMUSG00000060240.13	chr7:141006359-141009404	Cend1	protein_coding	MGI:1929898	-0.0727905	0.032364	-2.24912	0.0245049	0.274256
ENSMUSG00000060284	ENSMUSG00000060284.8	chr15:102265041-102275617	Sp7	protein_coding	MGI:2153568	-0.26368	0.104176	-2.53111	0.0113704	0.188278
ENSMUSG00000060314	ENSMUSG00000060314.14	chr7:140387362-140402091	Zfp941	protein_coding	MGI:3039601	0.219825	0.0600161	3.66276	0.000249508	0.0178288
ENSMUSG00000060371	ENSMUSG00000060371.13	chr5:130398296-130876253	Caln1	protein_coding	MGI:2155987	0.141085	0.0408533	3.45347	0.00055343	0.0303686
ENSMUSG00000060402	ENSMUSG00000060402.9	chr7:34373893-34512136	Chst8	protein_coding	MGI:1916197	-0.27416	0.100916	-2.71672	0.00659317	0.145083
ENSMUSG00000060568	ENSMUSG00000060568.15	chr1:166828986-166918871	Fam78b	protein_coding	MGI:2443050	0.0808414	0.0382088	2.11578	0.0343637	0.320053
ENSMUSG00000060594	ENSMUSG00000060594.7	chr9:50965940-50988394	Layn	protein_coding	MGI:2685357	-0.195606	0.0990248	-1.97532	0.0482313	0.369187
ENSMUSG00000060675	ENSMUSG00000060675.14	chr19:7534824-7565910	Plaat3	protein_coding	MGI:2179715	-0.135961	0.0380234	-3.57571	0.000349276	0.0213987
ENSMUSG00000060716	ENSMUSG00000060716.8	chr12:79075937-79128429	Plekhh1	protein_coding	MGI:2144989	-0.238204	0.0511632	-4.65576	3.22783e-06	0.000942867
ENSMUSG00000060802	ENSMUSG00000060802.9	chr2:121978167-121983564	B2m	protein_coding	MGI:88127	-0.104796	0.0488005	-2.14743	0.0317588	0.309613
ENSMUSG00000060938	ENSMUSG00000060938.15	chr11:68792409-68797815	Rpl26	protein_coding	MGI:106022	-0.0704767	0.0301501	-2.33753	0.0194116	0.243529
ENSMUSG00000061086	ENSMUSG00000061086.13	chr11:104441489-104486579	Myl4	protein_coding	MGI:97267	-0.300877	0.109685	-2.74309	0.00608648	0.136946
ENSMUSG00000061393	ENSMUSG00000061393.15	chr9:119231184-119264061	Acvr2b	protein_coding	MGI:87912	0.153819	0.0688774	2.23323	0.0255335	0.277664
ENSMUSG00000061410	ENSMUSG00000061410.7	chr8:122325442-122379640	Zcchc14	protein_coding	MGI:2159407	0.0804106	0.0399476	2.0129	0.0441252	0.355421
ENSMUSG00000061462	ENSMUSG00000061462.19	chr11:58885082-59029996	Obscn	protein_coding	MGI:2681862	-0.43987	0.0905786	-4.85623	1.19644e-06	0.000457638
ENSMUSG00000061518	ENSMUSG00000061518.12	chr1:36730530-36732762	Cox5b	protein_coding	MGI:88475	-0.0819079	0.0319243	-2.56569	0.010297	0.17999
ENSMUSG00000061536	ENSMUSG00000061536.14	chr9:121509111-121534556	Sec22c	protein_coding	MGI:2447871	0.0730574	0.0352155	2.07458	0.038025	0.333907
ENSMUSG00000061740	ENSMUSG00000061740.9	chr15:82254728-82264461	Cyp2d22	protein_coding	MGI:1929474	-0.103809	0.0470274	-2.20741	0.0272852	0.28896
ENSMUSG00000061751	ENSMUSG00000061751.17	chr16:33789443-34393902	Kalrn	protein_coding	MGI:2685385	0.123897	0.0466998	2.65306	0.00797664	0.161028
ENSMUSG00000061758	ENSMUSG00000061758.14	chr6:34361153-34373885	Akr1b10	protein_coding	MGI:1915111	-0.153959	0.0608192	-2.53143	0.01136	0.188278
ENSMUSG00000061787	ENSMUSG00000061787.16	chr7:80992480-80995002	Rps17	protein_coding	MGI:1309526	-0.0713592	0.0329545	-2.16538	0.0303583	0.302598
ENSMUSG00000062014	ENSMUSG00000062014.14	chr14:47045606-47059699	Gmfb	protein_coding	MGI:1927133	0.0703505	0.0288174	2.44125	0.0146364	0.214354
ENSMUSG00000062078	ENSMUSG00000062078.16	chr17:10421530-10538783	Qk	protein_coding	MGI:97837	-0.0983178	0.037421	-2.62734	0.0086055	0.166021
ENSMUSG00000062157	ENSMUSG00000062157.7	chr4:135413598-135435492	Ifnlr1	protein_coding	MGI:2429859	-0.727396	0.352928	-2.06103	0.0393002
ENSMUSG00000062184	ENSMUSG00000062184.12	chrX:50476089-50770733	Hs6st2	protein_coding	MGI:1354959	0.131269	0.0341853	3.83993	0.00012307	0.0109625
ENSMUSG00000062190	ENSMUSG00000062190.13	chr6:57679525-57716424	Lancl2	protein_coding	MGI:1919085	0.0818999	0.0392428	2.087	0.036888	0.328837
ENSMUSG00000062203	ENSMUSG00000062203.16	chr16:11037156-11072189	Gspt1	protein_coding	MGI:1316728	0.0673734	0.0338791	1.98864	0.0467409	0.364209
ENSMUSG00000062232	ENSMUSG00000062232.15	chr3:78969823-79193824	Rapgef2	protein_coding	MGI:2659071	0.149034	0.0396085	3.76267	0.000168107	0.0141047
ENSMUSG00000062257	ENSMUSG00000062257.14	chr9:27702071-28836706	Opcml	protein_coding	MGI:97397	0.109575	0.0379938	2.88403	0.00392625	0.106156
ENSMUSG00000062591	ENSMUSG00000062591.6	chr17:57387066-57394782	Tubb4a	protein_coding	MGI:107848	-0.112948	0.0369802	-3.05429	0.00225592	0.0740374
ENSMUSG00000062604	ENSMUSG00000062604.12	chr5:23708262-23889615	Srpk2	protein_coding	MGI:1201408	0.059123	0.0284543	2.07782	0.0377259	0.332628
ENSMUSG00000062960	ENSMUSG00000062960.11	chr5:76093487-76139118	Kdr	protein_coding	MGI:96683	-0.171348	0.0597939	-2.86565	0.00416154	0.109779
ENSMUSG00000062981	ENSMUSG00000062981.6	chr10:95316667-95337802	Mrpl42	protein_coding	MGI:1333774	-0.0970708	0.040273	-2.41032	0.0159386	0.225306
ENSMUSG00000063019	ENSMUSG00000063019.6	chr2:157209514-157238683	Manbal	protein_coding	MGI:1916411	-0.0817228	0.0403083	-2.02744	0.0426174	0.351451
ENSMUSG00000063108	ENSMUSG00000063108.16	chr9:20339745-20371458	Zfp26	protein_coding	MGI:99173	0.10385	0.0502547	2.06648	0.0387833	0.337141
ENSMUSG00000063229	ENSMUSG00000063229.16	chr7:46490899-46505051	Ldha	protein_coding	MGI:96759	0.0930014	0.0321251	2.89498	0.00379186	0.104256
ENSMUSG00000063245	ENSMUSG00000063245.12	chr4:146695418-146742617	Zfp993	protein_coding	MGI:3713585	1.20469	0.563967	2.1361	0.032671
ENSMUSG00000063260	ENSMUSG00000063260.3	chr15:89666596-89726063	Syt10	protein_coding	MGI:1859546	0.254705	0.0898888	2.83355	0.00460338	0.115233
ENSMUSG00000063296	ENSMUSG00000063296.6	chr15:94527113-94993979	Tmem117	protein_coding	MGI:2444580	-0.145121	0.0630564	-2.30145	0.0213662	0.253992
ENSMUSG00000063358	ENSMUSG00000063358.18	chr16:16801246-16865317	Mapk1	protein_coding	MGI:1346858	0.0846956	0.0326668	2.59271	0.00952225	0.17443
ENSMUSG00000063364	ENSMUSG00000063364.11	chr2:150152855-150204685	3300002I08Rik	protein_coding	MGI:1916527	0.328771	0.165361	1.9882	0.0467894
ENSMUSG00000063445	ENSMUSG00000063445.15	chr16:4527923-4537220	Nmral1	protein_coding	MGI:1915074	-0.174165	0.0610138	-2.85452	0.00431023	0.11078
ENSMUSG00000063568	ENSMUSG00000063568.12	chr6:52745782-53045616	Jazf1	protein_coding	MGI:2141450	0.141361	0.0477872	2.95813	0.00309507	0.0900479
ENSMUSG00000063594	ENSMUSG00000063594.6	chr7:16625711-16629361	Gng8	protein_coding	MGI:109163	-0.320186	0.12936	-2.47517	0.0133174
ENSMUSG00000063687	ENSMUSG00000063687.4	chr18:37453434-37456968	Pcdhb5	protein_coding	MGI:2136739	0.166052	0.0814921	2.03765	0.041585	0.347593
ENSMUSG00000063714	ENSMUSG00000063714.16	chr2:72809768-72819021	Sp3os	lncRNA	MGI:1914936	-0.174122	0.0731667	-2.3798	0.017322	0.232823
ENSMUSG00000063894	ENSMUSG00000063894.16	chr13:21697392-21715290	Zkscan8	protein_coding	MGI:1913815	0.10003	0.0424737	2.35511	0.0185171	0.238046
ENSMUSG00000063972	ENSMUSG00000063972.14	chr2:38613382-38817700	Nr6a1	protein_coding	MGI:1352459	0.155848	0.0731462	2.13064	0.0331187	0.315993
ENSMUSG00000064061	ENSMUSG00000064061.14	chr16:48744595-48814528	Dzip3	protein_coding	MGI:1917433	0.105085	0.0325538	3.22803	0.00124645	0.0524597
ENSMUSG00000064127	ENSMUSG00000064127.14	chrX:12541608-12628312	Med14	protein_coding	MGI:1349442	0.0712463	0.0361628	1.97015	0.0488209	0.371086
ENSMUSG00000064179	ENSMUSG00000064179.14	chr7:4507569-4519381	Tnnt1	protein_coding	MGI:1333868	-0.470269	0.173903	-2.7042	0.00684689
ENSMUSG00000064225	ENSMUSG00000064225.7	chr9:95441710-95450076	Paqr9	protein_coding	MGI:1922802	0.110783	0.0375425	2.95087	0.00316879	0.0911729
ENSMUSG00000064354	ENSMUSG00000064354.1	chrM:7013-7696	mt-Co2	protein_coding	MGI:102503	-0.122221	0.0479934	-2.54663	0.010877	0.185012
ENSMUSG00000064357	ENSMUSG00000064357.1	chrM:7927-8607	mt-Atp6	protein_coding	MGI:99927	-0.18431	0.061976	-2.97389	0.00294046	0.0885202
ENSMUSG00000064358	ENSMUSG00000064358.1	chrM:8607-9390	mt-Co3	protein_coding	MGI:102502	-0.141467	0.0664961	-2.12744	0.0333832	0.316482
ENSMUSG00000064373	ENSMUSG00000064373.14	chr15:3298029-3309990	Selenop	protein_coding	MGI:894288	-0.105227	0.0368057	-2.85899	0.00424998	0.110696
ENSMUSG00000066113	ENSMUSG00000066113.17	chr4:85432409-86346622	Adamtsl1	protein_coding	MGI:1924989	-0.144861	0.0686462	-2.11026	0.0348362	0.321081
ENSMUSG00000066129	ENSMUSG00000066129.18	chr7:139474612-139521450	Kndc1	protein_coding	MGI:1923734	-0.121716	0.0440072	-2.76582	0.00567796	0.130003
ENSMUSG00000066189	ENSMUSG00000066189.10	chr7:122269715-122368616	Cacng3	protein_coding	MGI:1859165	0.107638	0.0300736	3.57914	0.000344723	0.0213482
ENSMUSG00000066232	ENSMUSG00000066232.5	chr7:109617481-109655816	Ipo7	protein_coding	MGI:2152414	0.0632171	0.0304037	2.07925	0.037594	0.331914
ENSMUSG00000066643	ENSMUSG00000066643.13	chr12:9023892-9078847	Wdr35	protein_coding	MGI:1921932	0.0747453	0.0370432	2.01778	0.0436137	0.354055
ENSMUSG00000066721	ENSMUSG00000066721.4	chr7:24283263-24287066	Zfp575	protein_coding	MGI:2141921	0.128101	0.060445	2.11931	0.0340645	0.319021
ENSMUSG00000067279	ENSMUSG00000067279.4	chr19:36709131-36714053	Ppp1r3c	protein_coding	MGI:1858229	-0.15127	0.0470277	-3.2166	0.00129717	0.0535548
ENSMUSG00000067288	ENSMUSG00000067288.14	chr17:34038001-34043536	Rps28	protein_coding	MGI:1859516	-0.0834179	0.0291513	-2.86155	0.00421572	0.110535
ENSMUSG00000067369	ENSMUSG00000067369.13	chrX:133123088-133177733	Trmt2b	protein_coding	MGI:2442530	-0.160724	0.057409	-2.79964	0.00511603	0.122751
ENSMUSG00000067424	ENSMUSG00000067424.14	chr17:33308284-33329679	Zfp563	protein_coding	MGI:2677168	0.105811	0.0500477	2.1142	0.0344983	0.32024
ENSMUSG00000067847	ENSMUSG00000067847.14	chr2:155985959-155987717	Romo1	protein_coding	MGI:1914317	-0.110438	0.0460009	-2.40078	0.0163603	0.228887
ENSMUSG00000067889	ENSMUSG00000067889.8	chr19:4761195-4802388	Sptbn2	protein_coding	MGI:1313261	0.0893647	0.0455193	1.96323	0.0496198	0.374525
ENSMUSG00000067925	ENSMUSG00000067925.5	chrX:52644455-52645649	Rtl8a	protein_coding	MGI:1913408	-0.0893516	0.0433961	-2.05898	0.0394964	0.337965
ENSMUSG00000068015	ENSMUSG00000068015.9	chr14:74992115-75185316	Lrch1	protein_coding	MGI:2443390	-0.124786	0.0481376	-2.59227	0.00953436	0.17443
ENSMUSG00000068037	ENSMUSG00000068037.12	chr17:13059966-13087030	Mas1	protein_coding	MGI:96918	0.211496	0.0976438	2.16599	0.0303117	0.302598
ENSMUSG00000068099	ENSMUSG00000068099.6	chr15:82136598-82144954	1500009C09Rik	protein_coding	MGI:1923755	-0.0651407	0.0308661	-2.11043	0.0348216	0.321081
ENSMUSG00000068151	ENSMUSG00000068151.8	chr7:60777744-60961469	A230006K03Rik	lncRNA	MGI:3644205	0.261315	0.112009	2.33299	0.0196488	0.245233
ENSMUSG00000068267	ENSMUSG00000068267.6	chr2:131017102-131021987	Cenpb	protein_coding	MGI:88376	-0.0674664	0.0299677	-2.2513	0.0243664	0.273649
ENSMUSG00000068373	ENSMUSG00000068373.16	chr2:103973418-104241358	D430041D05Rik	protein_coding	MGI:2181743	0.104662	0.0399928	2.61703	0.00886988	0.168951
ENSMUSG00000068615	ENSMUSG00000068615.5	chr2:113840082-113844100	Gjd2	protein_coding	MGI:1334209	-0.227947	0.0819665	-2.78098	0.0054195	0.125839
ENSMUSG00000068735	ENSMUSG00000068735.15	chr2:93017893-93032104	Trp53i11	protein_coding	MGI:2670995	0.117587	0.0593135	1.98246	0.0474281	0.366708
ENSMUSG00000068758	ENSMUSG00000068758.9	chr14:8113752-8123488	Il3ra	protein_coding	MGI:96553	-0.36437	0.16339	-2.23006	0.0257436
ENSMUSG00000068798	ENSMUSG00000068798.11	chr3:105634583-105708652	Rap1a	protein_coding	MGI:97852	-0.112636	0.0431352	-2.61123	0.00902165	0.169588
ENSMUSG00000068966	ENSMUSG00000068966.11	chr2:33296120-33321336	Zbtb34	protein_coding	MGI:2685195	0.127857	0.053389	2.39481	0.0166289	0.230063
ENSMUSG00000069227	ENSMUSG00000069227.5	chr13:54884484-54897687	Gprin1	protein_coding	MGI:1349455	0.156771	0.0465748	3.366	0.000762663	0.038146
ENSMUSG00000069895	ENSMUSG00000069895.5	chr8:110453083-110464371	Atxn1l	protein_coding	MGI:3694797	0.0764383	0.0340417	2.24543	0.0247403	0.275626
ENSMUSG00000069920	ENSMUSG00000069920.11	chr8:105979270-105981785	B3gnt9	protein_coding	MGI:2142841	-0.162936	0.0767231	-2.12369	0.0336964	0.318475
ENSMUSG00000070366	ENSMUSG00000070366.6	chr7:128858755-128993136	Plpp4	protein_coding	MGI:2685936	-0.213764	0.0940068	-2.27392	0.0229707	0.264932
ENSMUSG00000070427	ENSMUSG00000070427.5	chr7:101664092-101667897	Il18bp	protein_coding	MGI:1333800	0.261249	0.109747	2.38046	0.0172912	0.232823
ENSMUSG00000070498	ENSMUSG00000070498.4	chr5:125608838-125869647	Tmem132b	protein_coding	MGI:3609245	0.125349	0.0341704	3.66836	0.000244114	0.0175398
ENSMUSG00000070509	ENSMUSG00000070509.16	chr7:73025257-73069647	Rgma	protein_coding	MGI:2679262	-0.10577	0.0438023	-2.41471	0.0157476	0.224067
ENSMUSG00000070565	ENSMUSG00000070565.12	chr1:156962752-157240165	Rasal2	protein_coding	MGI:2443881	0.096414	0.0476972	2.02137	0.043241	0.353261
ENSMUSG00000070577	ENSMUSG00000070577.6	chr4:148727774-148756029	Gm572	protein_coding	MGI:2685418	-0.916186	0.452825	-2.02327	0.0430455
ENSMUSG00000070705	ENSMUSG00000070705.4	chr7:27977164-27978914	Eid2b	protein_coding	MGI:1924095	0.098247	0.0441942	2.22308	0.0262107	0.281389
ENSMUSG00000070738	ENSMUSG00000070738.11	chr1:87781009-87872902	Dgkd	protein_coding	MGI:2138334	0.0849757	0.0315579	2.69269	0.00708784	0.150371
ENSMUSG00000070802	ENSMUSG00000070802.6	chr7:16678607-16682753	Pnma8b	protein_coding	MGI:3645856	0.067793	0.0340574	1.99055	0.0465301	0.364113
ENSMUSG00000071042	ENSMUSG00000071042.13	chr17:75742891-75836049	Rasgrp3	protein_coding	MGI:3028579	-0.124182	0.0458738	-2.70703	0.00678887	0.147888
ENSMUSG00000071537	ENSMUSG00000071537.7	chr6:38602628-38614177	Klrg2	protein_coding	MGI:1921503	0.642633	0.327134	1.96443	0.0494801
ENSMUSG00000071604	ENSMUSG00000071604.6	chr19:23950114-24008383	Fam189a2	protein_coding	MGI:2685813	-0.175729	0.0571365	-3.0756	0.00210081	0.0717955
ENSMUSG00000071647	ENSMUSG00000071647.6	chr19:8906916-8918946	Eml3	protein_coding	MGI:2387612	-0.152703	0.0593421	-2.57326	0.0100745	0.1785
ENSMUSG00000071648	ENSMUSG00000071648.5	chr19:8904755-8906720	Rom1	protein_coding	MGI:97998	-0.16648	0.0760024	-2.19046	0.0284912	0.296725
ENSMUSG00000071711	ENSMUSG00000071711.13	chr15:78290616-78298213	Mpst	protein_coding	MGI:2179733	-0.0952525	0.0404098	-2.35716	0.0184151	0.238046
ENSMUSG00000072294	ENSMUSG00000072294.6	chr14:100108068-100522115	Klf12	protein_coding	MGI:1333796	0.189725	0.0475368	3.99112	6.57625e-05	0.00737277
ENSMUSG00000072676	ENSMUSG00000072676.13	chr14:25923724-25928096	Tmem254	protein_coding	MGI:1196450	-0.0967278	0.044872	-2.15564	0.0311119	0.306291
ENSMUSG00000073002	ENSMUSG00000073002.10	chr6:72345777-72357451	Vamp5	protein_coding	MGI:1858622	-0.310539	0.136337	-2.27774	0.022742
ENSMUSG00000073016	ENSMUSG00000073016.4	chrX:103526424-103551096	Uprt	protein_coding	MGI:2685620	0.163485	0.0693493	2.35742	0.0184025	0.238046
ENSMUSG00000073514	ENSMUSG00000073514.5	chr18:89310548-89787652	Dok6	protein_coding	MGI:3639495	0.10149	0.0502384	2.02017	0.0433659	0.353261
ENSMUSG00000073557	ENSMUSG00000073557.13	chr1:134682396-134883680	Ppp1r12b	protein_coding	MGI:1916417	0.149104	0.0433722	3.43777	0.000586527	0.0315198
ENSMUSG00000073600	ENSMUSG00000073600.6	chr18:35783404-35788291	Prob1	protein_coding	MGI:2686460	-0.210032	0.0673139	-3.12019	0.00180737	0.0663647
ENSMUSG00000073680	ENSMUSG00000073680.3	chr4:155866048-155870331	Tmem88b	protein_coding	MGI:2444329	-0.21956	0.0466971	-4.7018	2.57881e-06	0.000838437
ENSMUSG00000073910	ENSMUSG00000073910.11	chr4:34949074-35157484	Mob3b	protein_coding	MGI:2664539	-0.2399	0.0640661	-3.74457	0.000180705	0.0145967
ENSMUSG00000073982	ENSMUSG00000073982.12	chr7:101888330-101905261	Rhog	protein_coding	MGI:1928370	-0.222979	0.0464486	-4.80056	1.58223e-06	0.000571582
ENSMUSG00000074217	ENSMUSG00000074217.9	chr8:84736851-84738800	Misp3	protein_coding	MGI:1917384	-0.491978	0.201679	-2.43941	0.0147114
ENSMUSG00000074305	ENSMUSG00000074305.10	chr9:56108410-56325351	Peak1	protein_coding	MGI:2442366	0.117866	0.0556496	2.11801	0.0341743	0.319236
ENSMUSG00000074345	ENSMUSG00000074345.5	chr9:53930689-53975672	Tnfaip8l3	protein_coding	MGI:2685363	0.204566	0.078916	2.5922	0.00953633	0.17443
ENSMUSG00000074457	ENSMUSG00000074457.11	chr3:90444561-90450458	S100a16	protein_coding	MGI:1915110	-0.121559	0.0441282	-2.75467	0.0058751	0.13288
ENSMUSG00000074575	ENSMUSG00000074575.5	chr2:168102037-168123656	Kcng1	protein_coding	MGI:3616086	0.157062	0.0502055	3.12838	0.00175775	0.0653129
ENSMUSG00000074634	ENSMUSG00000074634.13	chr13:119624575-120072595	Tmem267	protein_coding	MGI:3648543	0.245345	0.0569401	4.30882	1.64125e-05	0.00273646
ENSMUSG00000074643	ENSMUSG00000074643.13	chr2:155913762-155953885	Cpne1	protein_coding	MGI:2386621	0.105474	0.0455545	2.31533	0.020595	0.250247
ENSMUSG00000074766	ENSMUSG00000074766.11	chr2:139520098-139600501	Ism1	protein_coding	MGI:2442963	0.179728	0.0872783	2.05925	0.0394701	0.337965
ENSMUSG00000074776	ENSMUSG00000074776.5	chr10:97517276-97802952	Gm10754	lncRNA	MGI:3642925	0.196802	0.0755069	2.60641	0.00914968	0.171458
ENSMUSG00000074785	ENSMUSG00000074785.6	chr10:94626728-94780697	Plxnc1	protein_coding	MGI:1890127	0.22126	0.0516304	4.28546	1.82364e-05	0.00296456
ENSMUSG00000074794	ENSMUSG00000074794.11	chr13:81031503-81044161	Arrdc3	protein_coding	MGI:2145242	-0.108079	0.0435338	-2.48264	0.0130412	0.202278
ENSMUSG00000075284	ENSMUSG00000075284.11	chr2:73259954-73360078	Wipf1	protein_coding	MGI:2178801	-0.102785	0.046909	-2.19116	0.0284401	0.296725
ENSMUSG00000075324	ENSMUSG00000075324.14	chr2:63801851-63928382	Fign	protein_coding	MGI:1890647	-0.238997	0.110361	-2.1656	0.0303421	0.302598
ENSMUSG00000075389	ENSMUSG00000075389.4	chr11:120076226-120080678	2810410L24Rik	lncRNA	MGI:1923627	-0.220412	0.0790679	-2.78764	0.00530943	0.123882
ENSMUSG00000075415	ENSMUSG00000075415.14	chr2:30916218-31032020	Fnbp1	protein_coding	MGI:109606	-0.128704	0.0326237	-3.9451	7.97661e-05	0.008233
ENSMUSG00000075470	ENSMUSG00000075470.3	chr15:90108514-90117674	Alg10b	protein_coding	MGI:2146159	0.127223	0.0330838	3.84547	0.000120321	0.0108208
ENSMUSG00000075486	ENSMUSG00000075486.11	chr14:101870417-101878122	Commd6	protein_coding	MGI:1913450	-0.0851631	0.042763	-1.99151	0.0464243	0.364113
ENSMUSG00000075590	ENSMUSG00000075590.5	chr15:75957367-75963476	Nrbp2	protein_coding	MGI:2385017	-0.124402	0.0405315	-3.06926	0.00214591	0.0721775
ENSMUSG00000075702	ENSMUSG00000075702.11	chr11:3464684-3467351	Selenom	protein_coding	MGI:2149786	-0.0895746	0.0449769	-1.99157	0.0464183	0.364113
ENSMUSG00000075707	ENSMUSG00000075707.7	chr12:110245502-110247531	Dio3	protein_coding	MGI:1306782	0.65968	0.219406	3.00667	0.00264128
ENSMUSG00000076439	ENSMUSG00000076439.13	chr17:37321635-37334290	Mog	protein_coding	MGI:97435	-0.227936	0.0421322	-5.41002	6.30192e-08	6.30435e-05
ENSMUSG00000076617	ENSMUSG00000076617.10	chr12:113382178-113386350	Ighm	IG_C_gene	MGI:96448	-0.285517	0.129546	-2.20397	0.0275264	0.290098
ENSMUSG00000078161	ENSMUSG00000078161.9	chr3:154369496-154473427	Erich3	protein_coding	MGI:1919095	0.0998269	0.0497883	2.00503	0.0449603	0.358628
ENSMUSG00000078532	ENSMUSG00000078532.10	chr4:130297197-130339644	Nkain1	protein_coding	MGI:1914399	-0.168134	0.0448501	-3.7488	0.000177682	0.0144422
ENSMUSG00000078584	ENSMUSG00000078584.10	chr4:119060767-119089909	AU022252	protein_coding	MGI:2140466	0.0822383	0.0401535	2.0481	0.0405502	0.343107
ENSMUSG00000078771	ENSMUSG00000078771.11	chr11:79417386-79421435	Evi2a	protein_coding	MGI:95458	-0.234715	0.0548077	-4.28252	1.84789e-05	0.00296688
ENSMUSG00000078816	ENSMUSG00000078816.11	chr7:3337704-3379615	Prkcg	protein_coding	MGI:97597	0.0803814	0.040521	1.9837	0.0472898	0.36651
ENSMUSG00000079056	ENSMUSG00000079056.13	chr2:127298418-127364014	Kcnip3	protein_coding	MGI:1929258	0.101436	0.0358098	2.83265	0.00461642	0.115233
ENSMUSG00000079304	ENSMUSG00000079304.6	chr6:128352419-128362107	Tex52	protein_coding	MGI:1918399	-0.215631	0.104995	-2.05373	0.0400014
ENSMUSG00000079499	ENSMUSG00000079499.10	chr2:29135119-29143018	6530402F18Rik	lncRNA	MGI:1923470	0.16594	0.083377	1.99023	0.0465654	0.364113
ENSMUSG00000079657	ENSMUSG00000079657.11	chr17:24746215-24753184	Rab26	protein_coding	MGI:2443284	0.11454	0.0487235	2.35082	0.0187319	0.2393
ENSMUSG00000081225	ENSMUSG00000081225.4	chr4:95987555-96029389	Cyp2j12	protein_coding	MGI:3717097	-0.273999	0.0869491	-3.15126	0.0016257	0.0623663
ENSMUSG00000081534	ENSMUSG00000081534.4	chr15:97676401-97690573	Slc48a1	protein_coding	MGI:1914989	-0.0910375	0.030759	-2.9597	0.00307936	0.0897918
ENSMUSG00000084843	ENSMUSG00000084843.2	chr2:180012284-180027678	B230312C02Rik	lncRNA	MGI:2444130	-0.895274	0.310401	-2.88425	0.00392345
ENSMUSG00000084899	ENSMUSG00000084899.2	chr10:86527983-86528959	Gm15344	lncRNA	MGI:3708098	-0.51647	0.260364	-1.98364	0.0472956
ENSMUSG00000085167	ENSMUSG00000085167.2	chr11:24026559-24027367	Gm12063	lncRNA	MGI:3649572	0.556714	0.227306	2.44919	0.0143179
ENSMUSG00000085224	ENSMUSG00000085224.3	chr2:31523465-31530601	Gm13425	lncRNA	MGI:3649915	1.6814	0.654049	2.57075	0.0101479
ENSMUSG00000085382	ENSMUSG00000085382.2	chr6:34628289-34630829	Gm13861	lncRNA	MGI:3649466	-0.517513	0.261308	-1.98047	0.0476505
ENSMUSG00000085438	ENSMUSG00000085438.2	chr2:119424778-119437983	Oip5os1	lncRNA	MGI:1913852	0.0909442	0.0305711	2.97484	0.00293142	0.0884526
ENSMUSG00000085793	ENSMUSG00000085793.4	chr12:84498196-84592919	Lin52	protein_coding	MGI:3045391	-0.0916782	0.0454019	-2.01926	0.0434603	0.353261
ENSMUSG00000085890	ENSMUSG00000085890.8	chr11:69572964-69581967	Tnfsf13os	lncRNA	MGI:1919587	0.936495	0.43798	2.13821	0.0324994
ENSMUSG00000085982	ENSMUSG00000085982.2	chrX:151820625-151855911	9530051G07Rik	lncRNA	MGI:2442715	0.512784	0.197935	2.59066	0.00957911
ENSMUSG00000086006	ENSMUSG00000086006.3	chr2:11344299-11348922	Gm13293	lncRNA	MGI:3649469	-0.198229	0.0960077	-2.06472	0.0389496	0.337141
ENSMUSG00000086040	ENSMUSG00000086040.9	chr6:54406588-54480753	Wipf3	protein_coding	MGI:3044681	0.0834803	0.0372404	2.24166	0.0249832	0.276279
ENSMUSG00000086109	ENSMUSG00000086109.3	chr2:6476811-6483430	Gm13391	lncRNA	MGI:3651526	0.942094	0.42091	2.23823	0.025206
ENSMUSG00000086187	ENSMUSG00000086187.2	chr4:120473037-120479879	Gm12860	lncRNA	MGI:3651651	-0.845983	0.415426	-2.03642	0.0417081
ENSMUSG00000086502	ENSMUSG00000086502.2	chr7:127047808-127059532	B130055M24Rik	lncRNA	MGI:3590645	0.18238	0.0773351	2.3583	0.0183586	0.238046
ENSMUSG00000086552	ENSMUSG00000086552.4	chr11:95035878-95049873	Dlx4os	lncRNA	MGI:2444057	-0.759959	0.34565	-2.19864	0.0279038
ENSMUSG00000086589	ENSMUSG00000086589.2	chr4:124629523-124645147	Gm12915	lncRNA	MGI:3650273	0.833025	0.387933	2.14734	0.0317658
ENSMUSG00000086782	ENSMUSG00000086782.3	chr4:101203728-101213932	E130102H24Rik	lncRNA	MGI:1925116	0.248472	0.108788	2.284	0.0223718
ENSMUSG00000087165	ENSMUSG00000087165.8	chr11:57686325-57692243	2010001A14Rik	lncRNA	MGI:1923766	-0.269399	0.0890851	-3.02406	0.00249403	0.0786363
ENSMUSG00000087222	ENSMUSG00000087222.2	chr2:75535114-75540368	E030042O20Rik	lncRNA	MGI:2444099	0.880931	0.392293	2.24559	0.0247302
ENSMUSG00000087260	ENSMUSG00000087260.6	chr3:107186174-107191398	Lamtor5	protein_coding	MGI:1915826	-0.090544	0.0407551	-2.22166	0.0263062	0.281805
ENSMUSG00000087403	ENSMUSG00000087403.10	chrX:151077824-151110491	Kantr	protein_coding	MGI:1920247	0.118276	0.0472828	2.50146	0.0123682	0.196009
ENSMUSG00000087470	ENSMUSG00000087470.3	chr4:127368641-127464295	A630031M04Rik	lncRNA	MGI:2444470	0.714849	0.340254	2.10093	0.0356472
ENSMUSG00000087478	ENSMUSG00000087478.2	chr17:8512198-8529912	4930506C21Rik	lncRNA	MGI:1922310	-0.255793	0.0975749	-2.6215	0.00875433	0.168169
ENSMUSG00000089857	ENSMUSG00000089857.10	chr8:72662452-72670198	Zfp882	protein_coding	MGI:3642748	0.155304	0.0532568	2.91613	0.00354405	0.0989064
ENSMUSG00000090019	ENSMUSG00000090019.6	chr6:48715988-48720729	Gimap1	protein_coding	MGI:109368	-0.289684	0.126023	-2.29866	0.021524
ENSMUSG00000090053	ENSMUSG00000090053.10	chr4:57434247-57712016	Pakap	protein_coding	MGI:5141924	0.171225	0.068756	2.49032	0.0127628	0.199256
ENSMUSG00000090061	ENSMUSG00000090061.10	chr5:63806445-63967889	Nwd2	protein_coding	MGI:1920464	0.361087	0.0807585	4.4712	7.77827e-06	0.00155625
ENSMUSG00000090063	ENSMUSG00000090063.7	chr6:6820189-6871592	Dlx6os1	lncRNA	MGI:2443217	0.0894014	0.0390625	2.28868	0.0220981	0.257977
ENSMUSG00000090213	ENSMUSG00000090213.2	chr2:167484528-167531742	Peds1	protein_coding	MGI:2142624	-0.0945509	0.0392094	-2.41144	0.0158898	0.22486
ENSMUSG00000090733	ENSMUSG00000090733.7	chr3:90119829-90120958	Rps27	protein_coding	MGI:1888676	-0.0609044	0.0307146	-1.98291	0.0473769	0.366578
ENSMUSG00000090799	ENSMUSG00000090799.3	chr14:51126039-51134964	Klhl33	protein_coding	MGI:3644593	-0.212865	0.0801207	-2.6568	0.00788858	0.159948
ENSMUSG00000090862	ENSMUSG00000090862.4	chr7:115930740-115933430	Rps13	protein_coding	MGI:1915302	-0.0710322	0.0316741	-2.2426	0.0249229	0.276083
ENSMUSG00000091475	ENSMUSG00000091475.5	chr17:25789332-25794017	Cerox1	lncRNA	MGI:1920084	-0.092054	0.0400151	-2.30048	0.021421	0.254411
ENSMUSG00000091509	ENSMUSG00000091509.8	chr14:105346826-105352112	Gm17066	lncRNA	MGI:4937893	-0.187357	0.082034	-2.2839	0.0223774	0.259083
ENSMUSG00000091636	ENSMUSG00000091636.3	chr17:69746321-69796228	Akain1	protein_coding	MGI:2444600	-0.236195	0.0934442	-2.52766	0.0114827	0.188962
ENSMUSG00000091712	ENSMUSG00000091712.3	chr16:4964973-5005135	Sec14l5	protein_coding	MGI:3616084	-0.136608	0.0593375	-2.30222	0.0213229	0.253734
ENSMUSG00000091735	ENSMUSG00000091735.3	chr9:106341161-106343137	Gpr62	protein_coding	MGI:3525078	-0.188852	0.0635989	-2.96942	0.00298362	0.0892
ENSMUSG00000092035	ENSMUSG00000092035.9	chr6:4747306-4760517	Peg10	protein_coding	MGI:2157785	0.269452	0.136306	1.97682	0.0480624	0.368674
ENSMUSG00000092274	ENSMUSG00000092274.4	chr19:5874736-5895506	Neat1	lncRNA	MGI:1914211	-0.237683	0.0997456	-2.38289	0.0171774	0.232594
ENSMUSG00000093904	ENSMUSG00000093904.3	chr8:127657417-127672594	Tomm20	protein_coding	MGI:1915202	0.0735283	0.0352881	2.08366	0.0371915	0.329811
ENSMUSG00000093910	ENSMUSG00000093910.3	chr5:143272793-143279378	Zfp853	protein_coding	MGI:2685638	0.217547	0.103036	2.11138	0.0347395	0.320733
ENSMUSG00000094626	ENSMUSG00000094626.2	chr6:120465900-120470768	Tmem121b	protein_coding	MGI:2136977	0.086259	0.032748	2.63402	0.00843796	0.164394
ENSMUSG00000096014	ENSMUSG00000096014.2	chr8:12445295-12450126	Sox1	protein_coding	MGI:98357	0.133299	0.0520135	2.56279	0.0103835	0.180938
ENSMUSG00000096188	ENSMUSG00000096188.2	chr8:105074823-105122439	Cmtm4	protein_coding	MGI:2142888	0.0929979	0.037248	2.49672	0.0125346	0.197185
ENSMUSG00000096225	ENSMUSG00000096225.8	chr3:154011931-154036296	Lhx8	protein_coding	MGI:1096343	-0.211083	0.0992996	-2.12572	0.0335266	0.3171
ENSMUSG00000097268	ENSMUSG00000097268.2	chr1:37904380-37910469	Gm26805	lncRNA	MGI:5477299	0.285025	0.10555	2.70036	0.00692635	0.149099
ENSMUSG00000097303	ENSMUSG00000097303.3	chr14:58236780-58241154	3110083C13Rik	lncRNA	MGI:1920458	-0.533005	0.251004	-2.12349	0.0337127
ENSMUSG00000097466	ENSMUSG00000097466.9	chr9:81513604-81527209	D430036J16Rik	lncRNA	MGI:2441977	0.153327	0.0626396	2.44777	0.0143743	0.211708
ENSMUSG00000097617	ENSMUSG00000097617.3	chr9:44033483-44045782	Gm10687	lncRNA	MGI:3642689	-0.23597	0.10825	-2.17986	0.029268	0.299175
ENSMUSG00000097619	ENSMUSG00000097619.9	chr15:96129751-96152565	4833422M21Rik	lncRNA	MGI:1923018	-1.08045	0.458822	-2.35483	0.018531
ENSMUSG00000097745	ENSMUSG00000097745.2	chr3:152372550-152387069	AI115009	lncRNA	MGI:2139623	0.482566	0.216092	2.23315	0.0255393
ENSMUSG00000097789	ENSMUSG00000097789.3	chr7:84178162-84232739	Gm2115	protein_coding	MGI:3780284	-0.148886	0.0506026	-2.94225	0.00325832	0.0927501
ENSMUSG00000097794	ENSMUSG00000097794.3	chr14:32186999-32205505	Gm2990	lncRNA	MGI:3781168	-0.456647	0.216433	-2.10987	0.0348692
ENSMUSG00000097814	ENSMUSG00000097814.6	chr1:96798851-96835521	Panct2	lncRNA	MGI:3643517	0.262126	0.0922639	2.84105	0.00449653	0.113328
ENSMUSG00000097834	ENSMUSG00000097834.3	chr6:101175530-101197102	Gm26911	lncRNA	MGI:5477405	1.15077	0.52425	2.19508	0.0281581
ENSMUSG00000098066	ENSMUSG00000098066.3	chr7:92288947-92296650	Gm26944	lncRNA	MGI:5504059	0.440291	0.179387	2.45443	0.014111
ENSMUSG00000098202	ENSMUSG00000098202.3	chr12:109642711-109680989	B830012L14Rik	lncRNA	MGI:2443332	-0.624021	0.310348	-2.01071	0.0443557
ENSMUSG00000098211	ENSMUSG00000098211.3	chr8:122268819-122270220	Gm27045	lncRNA	MGI:5504160	1.3385	0.484143	2.76469	0.00569778
ENSMUSG00000098274	ENSMUSG00000098274.8	chr16:55786638-55791798	Rpl24	protein_coding	MGI:1915443	-0.0618327	0.0285562	-2.1653	0.0303645	0.302598
ENSMUSG00000098557	ENSMUSG00000098557.2	chr14:103214017-103220073	Kctd12	protein_coding	MGI:2145823	0.0925646	0.0351393	2.63422	0.00843305	0.164394
ENSMUSG00000098758	ENSMUSG00000098758.2	chr9:33953665-33970315	7630403G23Rik	lncRNA	MGI:1924369	-0.443796	0.210635	-2.10694	0.0351226
ENSMUSG00000098760	ENSMUSG00000098760.2	chr4:124422717-124550962	Gm2164	lncRNA	MGI:3780334	0.319842	0.140893	2.27011	0.023201
ENSMUSG00000099061	ENSMUSG00000099061.2	chr5:106648760-106722584	Gm28050	lncRNA	MGI:5547786	-0.398469	0.193173	-2.06276	0.0391358
ENSMUSG00000100147	ENSMUSG00000100147.3	chr1:182115555-182130890	1700047M11Rik	lncRNA	MGI:1914580	-0.168797	0.0645026	-2.61691	0.008873	0.168951
ENSMUSG00000100303	ENSMUSG00000100303.4	chr2:74969187-75148164	2600014E21Rik	lncRNA	MGI:1919384	-0.783183	0.354186	-2.21122	0.0270205
ENSMUSG00000100534	ENSMUSG00000100534.2	chr1:76867109-77004429	Gm816	lncRNA	MGI:2685662	-0.725749	0.345026	-2.10346	0.0354255
ENSMUSG00000100975	ENSMUSG00000100975.3	chr12:104891760-104892948	Gm28875	lncRNA	MGI:5579581	-0.501531	0.200435	-2.50221	0.0123422
ENSMUSG00000101389	ENSMUSG00000101389.2	chr19:11352887-11370154	Ms4a4a	protein_coding	MGI:3643932	0.891592	0.377339	2.36284	0.0181354
ENSMUSG00000102222	ENSMUSG00000102222.2	chr18:37880046-37974926	Pcdhga10	protein_coding	MGI:1935227	0.13801	0.0616333	2.23921	0.0251424	0.276396
ENSMUSG00000102336	ENSMUSG00000102336.2	chr1:34466083-34472345	Gm37233	lncRNA	MGI:5610461	0.193332	0.094866	2.03795	0.0415552	0.347593
ENSMUSG00000102440	ENSMUSG00000102440.2	chr18:37869989-37974923	Pcdhga9	protein_coding	MGI:1935226	0.14787	0.0540355	2.73653	0.00620907	0.139222
ENSMUSG00000102869	ENSMUSG00000102869.3	chr2:156229985-156234899	Norad	lncRNA	MGI:1914767	0.0656488	0.0267146	2.45742	0.013994	0.209383
ENSMUSG00000103409	ENSMUSG00000103409.3	chr9:107469829-107474274	Lsmem2	protein_coding	MGI:3612240	-0.901258	0.361809	-2.49098	0.0127392
ENSMUSG00000103567	ENSMUSG00000103567.2	chr18:37827433-37974926	Pcdhga5	protein_coding	MGI:1935217	0.117696	0.0581532	2.0239	0.0429809	0.353106
ENSMUSG00000103793	ENSMUSG00000103793.2	chr18:37840092-37974926	Pcdhga6	protein_coding	MGI:1935218	0.245013	0.0571151	4.28982	1.78818e-05	0.00294371
ENSMUSG00000103897	ENSMUSG00000103897.2	chr18:37858759-37974926	Pcdhga8	protein_coding	MGI:1935221	0.264537	0.0502047	5.26917	1.37044e-07	9.90141e-05
ENSMUSG00000104346	ENSMUSG00000104346.2	chr18:37807360-37974926	Pcdhga3	protein_coding	MGI:1935215	0.161538	0.0638504	2.52994	0.0114081	0.188278
ENSMUSG00000104727	ENSMUSG00000104727.2	chr5:128525968-128526846	Gm42500	lncRNA	MGI:5662637	-0.387245	0.171349	-2.25998	0.0238228
ENSMUSG00000104861	ENSMUSG00000104861.2	chr12:49436435-49454143	3110039M20Rik	lncRNA	MGI:1914543	-0.215162	0.0915118	-2.35119	0.0187133	0.2393
ENSMUSG00000104939	ENSMUSG00000104939.2	chr3:143282375-143294931	Gm33651	lncRNA	MGI:5592810	0.219377	0.0924952	2.37176	0.0177035	0.235654
ENSMUSG00000105006	ENSMUSG00000105006.2	chr5:97144065-97145223	Gm9484	lncRNA	MGI:3779894	-0.834974	0.321526	-2.59691	0.00940676
ENSMUSG00000105265	ENSMUSG00000105265.6	chr3:34158419-34736768	Sox2ot	lncRNA	MGI:2444112	-0.191456	0.0417803	-4.58245	4.59566e-06	0.0011005
ENSMUSG00000105339	ENSMUSG00000105339.2	chr3:116425320-116425858	Gm42457	lncRNA	MGI:5662594	-1.08656	0.5123	-2.12095	0.0339262
ENSMUSG00000105736	ENSMUSG00000105736.2	chr5:137272355-137286924	Gm42456	lncRNA	MGI:5662593	0.179079	0.088827	2.01605	0.0437951	0.354421
ENSMUSG00000105891	ENSMUSG00000105891.5	chr3:102169721-102352448	A230001M10Rik	lncRNA	MGI:2443043	-0.278635	0.0803941	-3.46586	0.000528537	0.0295005
ENSMUSG00000106874	ENSMUSG00000106874.2	chr6:18845909-18848206	Gm20186	lncRNA	MGI:5012371	0.194152	0.0892677	2.17494	0.0296347	0.299887
ENSMUSG00000107726	ENSMUSG00000107726.2	chr4:103074899-103076789	Gm44037	lncRNA	MGI:5690429	0.451513	0.20503	2.20218	0.0276529
ENSMUSG00000107728	ENSMUSG00000107728.2	chr6:134582197-134584644	Gm38910	lncRNA	MGI:5621795	-0.267509	0.130206	-2.0545	0.0399269
ENSMUSG00000107961	ENSMUSG00000107961.2	chr6:86710471-86714047	Gm44036	lncRNA	MGI:5690428	-0.89834	0.381729	-2.35334	0.0186054
ENSMUSG00000108348	ENSMUSG00000108348.3	chr7:16717011-16722077	Pnma8c	protein_coding	MGI:5625257	0.11272	0.0326838	3.44882	0.000563052	0.0306301
ENSMUSG00000109006	ENSMUSG00000109006.3	chr7:61179619-61265075	B230209E15Rik	lncRNA	MGI:2442668	0.138672	0.0472324	2.93595	0.00332529	0.0939376
ENSMUSG00000109460	ENSMUSG00000109460.2	chr7:98970407-98971662	Gm45591	lncRNA	MGI:5791427	0.408443	0.188431	2.1676	0.0301891
ENSMUSG00000110027	ENSMUSG00000110027.2	chr7:135870053-135920242	C030029H02Rik	lncRNA	MGI:1924633	-0.187669	0.0769947	-2.43743	0.0147921	0.216148
ENSMUSG00000110185	ENSMUSG00000110185.3	chr18:36431732-36434570	Igip	protein_coding	MGI:1924271	-0.123775	0.0552539	-2.24011	0.0250839	0.276394
ENSMUSG00000110195	ENSMUSG00000110195.2	chr7:101070898-101162034	Pde2a	protein_coding	MGI:2446107	0.063294	0.0297301	2.12896	0.0332578	0.316113
ENSMUSG00000110924	ENSMUSG00000110924.2	chr9:48043802-48070263	Gm40518	lncRNA	MGI:5623403	0.525393	0.154121	3.40897	0.000652089	0.0343337
ENSMUSG00000111375	ENSMUSG00000111375.5	chr5:107585863-107659073	Btbd8	protein_coding	MGI:3646208	0.0689597	0.0297298	2.31954	0.0203655	0.249626
ENSMUSG00000112168	ENSMUSG00000112168.2	chr10:72776070-72785624	Gm34776	lncRNA	MGI:5593935	-0.446386	0.171861	-2.59736	0.00939427
ENSMUSG00000112540	ENSMUSG00000112540.2	chr10:118854251-118857575	Gm47461	lncRNA	MGI:6096425	1.17929	0.500113	2.35804	0.0183719
ENSMUSG00000113121	ENSMUSG00000113121.2	chr13:69146912-69179669	Gm35161	lncRNA	MGI:5594320	0.303239	0.145405	2.08548	0.0370258
ENSMUSG00000113170	ENSMUSG00000113170.2	chr13:35056495-35059415	Gm36839	lncRNA	MGI:5595998	-0.328421	0.166375	-1.97398	0.0483838
ENSMUSG00000113216	ENSMUSG00000113216.2	chr13:28578436-28604049	Gm40841	lncRNA	MGI:5623726	-0.158568	0.0808407	-1.96149	0.0498224	0.375835
ENSMUSG00000113527	ENSMUSG00000113527.2	chr12:116243302-116243851	Gm48079	lncRNA	MGI:6097416	-0.642204	0.264915	-2.42419	0.0153425
ENSMUSG00000113581	ENSMUSG00000113581.2	chr12:110241819-110244606	Dio3os	lncRNA	MGI:2664395	0.591545	0.231445	2.55587	0.0105922
ENSMUSG00000114621	ENSMUSG00000114621.2	chr14:68281877-68288779	Gm31107	lncRNA	MGI:5590266	-1.06477	0.522408	-2.0382	0.0415295
ENSMUSG00000114780	ENSMUSG00000114780.2	chr13:107606322-107619218	AI197445	lncRNA	MGI:2145191	0.259264	0.106103	2.44351	0.0145451	0.213498
ENSMUSG00000114961	ENSMUSG00000114961.2	chr13:47297418-47302146	A930002C04Rik	lncRNA	MGI:2442085	0.260219	0.12232	2.12735	0.0333906
ENSMUSG00000115338	ENSMUSG00000115338.3	chr14:51168539-51202694	Pnp	protein_coding	MGI:97365	-0.152589	0.0529578	-2.88133	0.00396006	0.106848
ENSMUSG00000115518	ENSMUSG00000115518.2	chr16:84769102-84776339	Gm10791	lncRNA	MGI:3641949	-0.635791	0.290322	-2.18995	0.0285277
ENSMUSG00000115650	ENSMUSG00000115650.2	chr14:111669644-111670744	Gm48992	lncRNA	MGI:6118339	-0.592777	0.213854	-2.77188	0.00557335
ENSMUSG00000116525	ENSMUSG00000116525.2	chr16:8762777-8787764	Gm30371	lncRNA	MGI:5589530	0.431942	0.203584	2.12169	0.033864
ENSMUSG00000116793	ENSMUSG00000116793.2	chr16:31409014-31412038	Gm34256	lncRNA	MGI:5593415	-0.357399	0.129483	-2.7602	0.00577666	0.131799
ENSMUSG00000116840	ENSMUSG00000116840.2	chr16:34819671-34843575	Gm21691	lncRNA	MGI:5435046	-0.676209	0.292194	-2.31425	0.0206541
ENSMUSG00000117011	ENSMUSG00000117011.2	chr17:43456932-43469182	E130008D07Rik	lncRNA	MGI:3584523	0.138166	0.0653873	2.11304	0.0345972	0.32024
ENSMUSG00000117254	ENSMUSG00000117254.2	chr17:14470113-14498017	Gm34567	lncRNA	MGI:5593726	0.6644	0.329139	2.0186	0.0435289
ENSMUSG00000117286	ENSMUSG00000117286.2	chr5:37242714-37386891	Gm1043	protein_coding	MGI:2685889	0.163552	0.0754056	2.16896	0.0300858	0.301959
ENSMUSG00000117839	ENSMUSG00000117839.2	chr19:4242108-4242781	Gm50251	lncRNA	MGI:6303067	0.456475	0.23095	1.97651	0.0480967
ENSMUSG00000117864	ENSMUSG00000117864.2	chr18:57538487-57549222	Gm19500	lncRNA	MGI:5011685	-0.182408	0.0830892	-2.19533	0.02814	0.294417
ENSMUSG00000118099	ENSMUSG00000118099.2	chr19:55087934-55106247	Gm31356	lncRNA	MGI:5590515	0.27504	0.0959331	2.867	0.00414382	0.109756
ENSMUSG00000118234	ENSMUSG00000118234.2	chr18:65752731-65757997	Gm50115	lncRNA	MGI:6302854	0.699898	0.320659	2.18269	0.0290588
ENSMUSG00000118401	ENSMUSG00000118401.2	chr1:160403908-160405544	Gpr52	protein_coding	MGI:3643278	0.160237	0.0508418	3.15167	0.00162339	0.0623663
ENSMUSG00000118462	ENSMUSG00000118462.2	chr7:45067777-45071278	Lhb	protein_coding	MGI:96782	0.729698	0.317763	2.29636	0.0216554
ENSMUSG00000118664	ENSMUSG00000118664.1	chr8:39472999-39619367	Tusc3	protein_coding	MGI:1933134	0.0809894	0.0289355	2.79897	0.00512661	0.122751

## Sheet: KO-1
GeneStableID	GeneID	Chr.Start.End	GeneName	GeneType	MGI_ID	log2FoldChange	lfcSE	stat	pvalue	padj	ASD.Gene	SFARI.Score	EAGLE.Annotation	TADA.FDR
ENSMUSG00000019986	ENSMUSG00000019986.18	chr10:20828446-20956328	Ahi1	protein_coding	MGI:87971	0.222589	0.0742251	2.99884	0.00271014	0.141231	AHI1	S
ENSMUSG00000041444	ENSMUSG00000041444.15	chr9:32027432-32179742	Arhgap32	protein_coding	MGI:2450166	0.228414	0.0580968	3.93162	8.43764e-05	0.0138635	ARHGAP32	S
ENSMUSG00000071176	ENSMUSG00000071176.11	chr8:14961663-15051085	Arhgef10	protein_coding	MGI:2444453	-0.16926	0.0650955	-2.60018	0.00931748	0.294407	ARHGEF10	S
ENSMUSG00000020123	ENSMUSG00000020123.7	chr10:122284404-122289357	Avpr1a	protein_coding	MGI:1859216	0.911516	0.360403	2.52916	0.0114336		AVPR1A	S
ENSMUSG00000013523	ENSMUSG00000013523.14	chr2:170188911-170269765	Bcas1	protein_coding	MGI:1924210	-0.302057	0.0685458	-4.40665	1.04984e-05	0.00271519	BCAS1	2
ENSMUSG00000040565	ENSMUSG00000040565.9	chr19:36903479-36990152	Btaf1	protein_coding	MGI:2147538	0.164848	0.0699254	2.35749	0.0183991	0.394749	BTAF1	2
ENSMUSG00000057914	ENSMUSG00000057914.16	chr2:14607899-14992719	Cacnb2	protein_coding	MGI:894644	0.16163	0.0732683	2.206	0.0273842	0.472158	CACNB2	2
ENSMUSG00000032076	ENSMUSG00000032076.21	chr9:47441471-47769413	Cadm1	protein_coding	MGI:1889272	0.179161	0.0781481	2.29259	0.0218717	0.421325	CADM1	2
ENSMUSG00000024617	ENSMUSG00000024617.17	chr18:61058690-61121224	Camk2a	protein_coding	MGI:88256	0.135484	0.0642346	2.10921	0.0349265	0.529915	CAMK2A	2
ENSMUSG00000036686	ENSMUSG00000036686.17	chr8:84859457-84874565	Cc2d1a	protein_coding	MGI:2384831	0.116457	0.0548596	2.12281	0.0337694	0.523148	CC2D1A	2
ENSMUSG00000036510	ENSMUSG00000036510.18	chr8:99751103-100143103	Cdh8	protein_coding	MGI:107434	0.112626	0.0537014	2.09727	0.0359697	0.536052	CDH8	2
ENSMUSG00000018474	ENSMUSG00000018474.19	chr11:69234099-69260232	Chd3	protein_coding	MGI:1344395	0.11575	0.0515323	2.24617	0.0246928	0.447289	CHD3	2
ENSMUSG00000034390	ENSMUSG00000034390.17	chr8:117983803-118186169	Cmip	protein_coding	MGI:1921690	0.142087	0.0539356	2.63439	0.00842898	0.276986	CMIP	2
ENSMUSG00000025658	ENSMUSG00000025658.17	chrX:156604432-156826290	Cnksr2	protein_coding	MGI:2661175	0.239905	0.0663486	3.61582	0.000299397	0.0324034	CNKSR2	1
ENSMUSG00000070695	ENSMUSG00000070695.5	chr1:115612486-116515053	Cntnap5a	protein_coding	MGI:3643623	0.18295	0.0806056	2.26969	0.0232264	0.432148	CNTNAP5	2
ENSMUSG00000067028	ENSMUSG00000067028.12	chr1:99700490-100413667	Cntnap5b	protein_coding	MGI:3664583	0.242992	0.108734	2.23474	0.0254341	0.454387	CNTNAP5	2
ENSMUSG00000038048	ENSMUSG00000038048.9	chr17:58076565-58717350	Cntnap5c	protein_coding	MGI:3646013	0.341498	0.17047	2.00327	0.0451483	0.587643	CNTNAP5	2
ENSMUSG00000032384	ENSMUSG00000032384.17	chr9:65816206-65952297	Csnk1g1	protein_coding	MGI:2660884	0.129101	0.0571969	2.25713	0.0239998	0.437574	CSNK1G1	3
ENSMUSG00000026170	ENSMUSG00000026170.7	chr1:74752733-74777051	Cyp27a1	protein_coding	MGI:88594	-0.491674	0.122945	-3.99915	6.35702e-05	0.0112382	CYP27A1	S
ENSMUSG00000020231	ENSMUSG00000020231.16	chr10:76095263-76181125	Dip2a	protein_coding	MGI:2385920	-0.135045	0.0526749	-2.56374	0.010355	0.307776	DIP2A	S
ENSMUSG00000045414	ENSMUSG00000045414.8	chr9:94399917-94420134	Dipk2a	protein_coding	MGI:1916111	0.158468	0.0751571	2.10849	0.0349885	0.529915	DIPK2A	S
ENSMUSG00000052572	ENSMUSG00000052572.20	chr7:90125880-92098455	Dlg2	protein_coding	MGI:1344351	0.123385	0.0513718	2.40181	0.0163142	0.37454	DLG2	S
ENSMUSG00000047495	ENSMUSG00000047495.16	chr8:14145865-14897680	Dlgap2	protein_coding	MGI:2443181	0.163305	0.0616076	2.65072	0.00803204	0.269006	DLGAP2	2	Limited (score=2.8)
ENSMUSG00000052273	ENSMUSG00000052273.5	chr7:119521894-119694503	Dnah3	protein_coding	MGI:2683040	0.657968	0.289213	2.27503	0.0229041		DNAH3	2
ENSMUSG00000035954	ENSMUSG00000035954.11	chr12:40495951-40896873	Dock4	protein_coding	MGI:1918006	0.117444	0.0472645	2.48482	0.0129616	0.338991	DOCK4	S
ENSMUSG00000036815	ENSMUSG00000036815.18	chr1:123249200-124773776	Dpp10	protein_coding	MGI:2442409	0.195725	0.072909	2.68451	0.00726367	0.25581	DPP10	S
ENSMUSG00000022048	ENSMUSG00000022048.9	chr14:67040313-67106137	Dpysl2	protein_coding	MGI:1349763	-0.158939	0.0515985	-3.08031	0.00206787	0.112732	DPYSL2	S	Limited (score=1)	0.09395911
ENSMUSG00000022705	ENSMUSG00000022705.6	chr16:43574389-43643295	Drd3	protein_coding	MGI:94925	0.800427	0.234178	3.41802	0.000630776		DRD3	2
ENSMUSG00000069495	ENSMUSG00000069495.13	chr2:49341498-49441960	Epc2	protein_coding	MGI:1278321	0.13461	0.0571272	2.35632	0.0184571	0.394749	EPC2	2
ENSMUSG00000026830	ENSMUSG00000026830.10	chr2:57935125-57942876	Ermn	protein_coding	MGI:1925017	-0.310678	0.0644404	-4.82117	1.4272e-06	0.000604008	ERMN	2
ENSMUSG00000021255	ENSMUSG00000021255.18	chr12:86407891-86568402	Esrrb	protein_coding	MGI:1346832	-0.450476	0.221146	-2.03701	0.0416489		ESRRB	2
ENSMUSG00000007653	ENSMUSG00000007653.13	chr11:42310584-42519855	Gabrb2	protein_coding	MGI:95620	0.217214	0.0692253	3.13778	0.00170231	0.0981354	GABRB2	1	Limited (score=0.3)
ENSMUSG00000033676	ENSMUSG00000033676.14	chr7:57069440-57478550	Gabrb3	protein_coding	MGI:95621	0.131025	0.0533565	2.45565	0.0140629	0.356213	GABRB3	1
ENSMUSG00000055026	ENSMUSG00000055026.14	chr7:56366213-57036936	Gabrg3	protein_coding	MGI:95624	0.146255	0.0726105	2.01424	0.0439847	0.582787	GABRG3	2
ENSMUSG00000027199	ENSMUSG00000027199.15	chr2:122424948-122441784	Gatm	protein_coding	MGI:1914342	-0.274045	0.069926	-3.91907	8.88922e-05	0.0142698	GATM	S
ENSMUSG00000058624	ENSMUSG00000058624.14	chr19:21368671-21450809	Gda	protein_coding	MGI:95678	0.292446	0.0667039	4.38424	1.16389e-05	0.00295543	GDA	S
ENSMUSG00000020932	ENSMUSG00000020932.15	chr11:102778162-102791738	Gfap	protein_coding	MGI:95697	-0.378136	0.0700382	-5.399	6.70131e-08	9.35905e-05	GFAP	S	Limited (score=0.3)
ENSMUSG00000039904	ENSMUSG00000039904.10	chr6:25665877-25690728	Gpr37	protein_coding	MGI:1313297	-0.290586	0.0576605	-5.0396	4.665e-07	0.000271464	GPR37	S
ENSMUSG00000048216	ENSMUSG00000048216.14	chr6:13834457-13839941	Gpr85	protein_coding	MGI:1927851	0.141975	0.0625241	2.27073	0.0231634	0.431909	GPR85	2
ENSMUSG00000020524	ENSMUSG00000020524.17	chr11:56902213-57221070	Gria1	protein_coding	MGI:95808	0.133432	0.048624	2.74415	0.00606671	0.230865	GRIA1	2
ENSMUSG00000033981	ENSMUSG00000033981.15	chr3:80588757-80710142	Gria2	protein_coding	MGI:95809	0.135433	0.0470186	2.88041	0.00397156	0.180087	GRIA2	S	Definitive (score=12)	0.06663618
ENSMUSG00000001985	ENSMUSG00000001985.10	chr4:125384493-125607966	Grik3	protein_coding	MGI:95816	0.162251	0.0569935	2.84684	0.00441558	0.190333	GRIK3	S
ENSMUSG00000056755	ENSMUSG00000056755.14	chr6:110622542-111544191	Grm7	protein_coding	MGI:1351344	0.119542	0.0537324	2.22477	0.0260965	0.460181	GRM7	S
ENSMUSG00000041624	ENSMUSG00000041624.11	chr9:3532778-3894736	Gucy1a2	protein_coding	MGI:2660877	0.352245	0.116881	3.01372	0.0025807	0.136008	GUCY1A2	2
ENSMUSG00000046240	ENSMUSG00000046240.9	chr9:37278647-37297871	Hepacam	protein_coding	MGI:1920177	-0.13071	0.0498771	-2.62064	0.00877645	0.284106	HEPACAM	2
ENSMUSG00000073411	ENSMUSG00000073411.13	chr17:35481706-35486475	H2-D1	protein_coding	MGI:95896	-0.158376	0.0738413	-2.14482	0.0319673	0.509071	HLA-A;HLA-B;HLA-G	2;2;2
ENSMUSG00000025499	ENSMUSG00000025499.19	chr7:140769018-140773918	Hras	protein_coding	MGI:96224	-0.123135	0.0571163	-2.15586	0.0310943	0.504209	HRAS	1
ENSMUSG00000016194	ENSMUSG00000016194.15	chr1:192903942-192946383	Hsd11b1	protein_coding	MGI:103562	-0.265816	0.0943227	-2.81815	0.00483011	0.202575	HSD11B1	2
ENSMUSG00000020758	ENSMUSG00000020758.16	chr11:115865535-115899238	Itgb4	protein_coding	MGI:96613	-0.291002	0.0749458	-3.88283	0.000103248	0.0151786	ITGB4			0.02412214
ENSMUSG00000058975	ENSMUSG00000058975.8	chr7:46045921-46088128	Kcnc1	protein_coding	MGI:96667	-0.120214	0.060393	-1.99053	0.0465321	0.59569	KCNC1	2
ENSMUSG00000035681	ENSMUSG00000035681.8	chr10:112107026-112302929	Kcnc2	protein_coding	MGI:96668	-0.296544	0.0761226	-3.89562	9.79496e-05	0.0145528	KCNC2	3
ENSMUSG00000040896	ENSMUSG00000040896.17	chr3:105359646-105581318	Kcnd3	protein_coding	MGI:1928743	0.171279	0.0755341	2.26757	0.0233553	0.4331	KCND3	2
ENSMUSG00000044708	ENSMUSG00000044708.6	chr1:172168777-172201652	Kcnj10	protein_coding	MGI:1194504	-0.216548	0.0610588	-3.54655	0.000390313	0.0373364	KCNJ10	2
ENSMUSG00000060012	ENSMUSG00000060012.10	chr14:64884714-65047066	Kif13b	protein_coding	MGI:1098265	-0.255151	0.0739008	-3.45262	0.000555181	0.0467088	KIF13B	2
ENSMUSG00000032193	ENSMUSG00000032193.10	chr9:21634779-21661215	Ldlr	protein_coding	MGI:96765	-0.237219	0.0708452	-3.34842	0.00081275	0.0613561	LDLR	3
ENSMUSG00000040490	ENSMUSG00000040490.5	chr17:49239407-49404616	Lrfn2	protein_coding	MGI:1917780	0.199744	0.093533	2.13555	0.032716	0.512233	LRFN2	2
ENSMUSG00000035653	ENSMUSG00000035653.17	chr12:61569936-61905128	Lrfn5	protein_coding	MGI:2144814	0.116537	0.0569159	2.04753	0.0406064	0.564499	LRFN5	2
ENSMUSG00000050587	ENSMUSG00000050587.15	chr2:96148514-97462011	Lrrc4c	protein_coding	MGI:2442636	0.0995501	0.0467446	2.12966	0.0331997	0.517486	LRRC4C	1	Limited (score=1.25)
ENSMUSG00000035342	ENSMUSG00000035342.15	chr19:45002853-45015550	Lzts2	protein_coding	MGI:2385095	-0.173176	0.0645354	-2.68343	0.00728704	0.25581	LZTS2	2
ENSMUSG00000036792	ENSMUSG00000036792.13	chr2:48839520-49215417	Mbd5	protein_coding	MGI:2138934	0.17255	0.0687709	2.50905	0.0121055	0.33051	MBD5	1	LoF curation: Definitive (score=46.6); Duplication curation: Moderate (score=8.5)	0.00025868
ENSMUSG00000031393	ENSMUSG00000031393.17	chrX:73070198-73178969	Mecp2	protein_coding	MGI:99918	0.119888	0.0591532	2.02674	0.0426891	0.578428	MECP2	1
ENSMUSG00000024593	ENSMUSG00000024593.16	chr18:57266162-57430539	Megf10	protein_coding	MGI:2685177	-0.195298	0.0848253	-2.30235	0.0213152	0.416705	MEGF10	2
ENSMUSG00000009376	ENSMUSG00000009376.16	chr6:17463799-17573979	Met	protein_coding	MGI:96969	-0.500443	0.199376	-2.51005	0.0120714	0.33051	MET	2
ENSMUSG00000009569	ENSMUSG00000009569.15	chr16:13074345-13235393	Mrtfb	protein_coding	MGI:3050795	0.146892	0.0674171	2.17886	0.0293422	0.486112	MRTFB	2
ENSMUSG00000032220	ENSMUSG00000032220.11	chr9:70114632-70307048	Myo1e	protein_coding	MGI:106621	-0.147182	0.0733695	-2.00604	0.044852	0.587072	MYO1E	2
ENSMUSG00000020181	ENSMUSG00000020181.19	chr10:109517120-110292065	Nav3	protein_coding	MGI:2183703	0.156461	0.0721071	2.16984	0.030019	0.492733	NAV3	2
ENSMUSG00000018501	ENSMUSG00000018501.18	chr11:62207252-62349367	Ncor1	protein_coding	MGI:1349717	0.113584	0.054537	2.08269	0.0372794	0.543963	NCOR1	2
ENSMUSG00000040037	ENSMUSG00000040037.14	chr3:156267431-157022082	Negr1	protein_coding	MGI:2444846	0.0985481	0.0473003	2.08346	0.0372098	0.543963	NEGR1	2
ENSMUSG00000029832	ENSMUSG00000029832.17	chr6:51409650-51435748	Nfe2l3	protein_coding	MGI:1339958	-0.240449	0.118441	-2.03012	0.0423439	0.577515	NFE2L3	2
ENSMUSG00000069171	ENSMUSG00000069171.15	chr13:78337092-78347876	Nr2f1	protein_coding	MGI:1352451	-0.262662	0.068305	-3.84544	0.000120338	0.0168065	NR2F1	2
ENSMUSG00000025969	ENSMUSG00000025969.16	chr1:62742444-62857854	Nrp2	protein_coding	MGI:1100492	0.471751	0.225006	2.09661	0.0360282	0.536052	NRP2	2
ENSMUSG00000028072	ENSMUSG00000028072.7	chr3:87685551-87702469	Ntrk1	protein_coding	MGI:97383	-0.275473	0.116639	-2.36176	0.0181886	0.392698	NTRK1	2
ENSMUSG00000055254	ENSMUSG00000055254.16	chr13:58954383-59281784	Ntrk2	protein_coding	MGI:97384	0.116497	0.0544801	2.13834	0.0324888	0.510966	NTRK2	S
ENSMUSG00000005917	ENSMUSG00000005917.16	chr11:21944764-21952897	Otx1	protein_coding	MGI:97450	-0.385901	0.172777	-2.23352	0.0255147	0.454491	OTX1	S
ENSMUSG00000021143	ENSMUSG00000021143.11	chr12:112978128-113038021	Pacs2	protein_coding	MGI:1924399	-0.187487	0.0537893	-3.48558	0.000491065	0.0431335	PACS2	S
ENSMUSG00000052534	ENSMUSG00000052534.16	chr1:167946933-168259839	Pbx1	protein_coding	MGI:97495	0.130271	0.052596	2.47682	0.0132557	0.343593	PBX1	S		0.0094427
ENSMUSG00000103770	ENSMUSG00000103770.2	chr18:37130933-37320710	Pcdha9	protein_coding	MGI:2447322	0.312915	0.145998	2.14328	0.0320903	0.509928	PCDHA10	2
ENSMUSG00000007440	ENSMUSG00000007440.11	chr18:37138256-37320710	Pcdha10	protein_coding	MGI:1298408	0.512221	0.159403	3.21337	0.00131186	0.0817399	PCDHA12	2
ENSMUSG00000103310	ENSMUSG00000103310.2	chr18:37153202-37320710	Pcdha12	protein_coding	MGI:1298370	0.284645	0.107872	2.63872	0.00832186	0.274759	PCDHA13	S
ENSMUSG00000104252	ENSMUSG00000104252.6	chr18:37085701-37320714	Pcdha4	protein_coding	MGI:1298406	0.382791	0.110277	3.47119	0.000518164	0.0449484	PCDHA4	S
ENSMUSG00000102697	ENSMUSG00000102697.2	chr18:37276556-37320710	Pcdhac2	protein_coding	MGI:1891443	0.192446	0.0715088	2.69122	0.00711919	0.253383	PCDHAC2	S
ENSMUSG00000050965	ENSMUSG00000050965.15	chr11:107824213-108234754	Prkca	protein_coding	MGI:97595	0.162172	0.0669379	2.42273	0.0154045	0.368389	PRKCA	2
ENSMUSG00000030465	ENSMUSG00000030465.20	chr8:68141734-68664679	Psd3	protein_coding	MGI:1918215	0.143209	0.0560211	2.55634	0.0105781	0.312996	PSD3	2
ENSMUSG00000053141	ENSMUSG00000053141.17	chr2:161363910-162503067	Ptprt	protein_coding	MGI:1321152	0.187654	0.0754259	2.48793	0.0128489	0.337582	PTPRT	2
ENSMUSG00000019873	ENSMUSG00000019873.9	chr10:66844968-66932724	Reep3	protein_coding	MGI:88930	-0.125744	0.0540124	-2.32805	0.0199093	0.407195	REEP3	2
ENSMUSG00000040929	ENSMUSG00000040929.18	chr19:27739121-27988566	Rfx3	protein_coding	MGI:106582	0.208404	0.0789045	2.64122	0.00826075	0.27469	RFX3	1	Definitive (score=15.95)	0.00128045
ENSMUSG00000032890	ENSMUSG00000032890.18	chr4:120712013-120753776	Rims3	protein_coding	MGI:2443331	-0.133899	0.0621832	-2.1533	0.0312952	0.506453	RIMS3	2
ENSMUSG00000032238	ENSMUSG00000032238.18	chr9:68561068-69295528	Rora	protein_coding	MGI:104661	-0.200807	0.0670361	-2.99551	0.00273991	0.141377	RORA	S
ENSMUSG00000036192	ENSMUSG00000036192.16	chr19:18907969-19088560	Rorb	protein_coding	MGI:1343464	-0.263538	0.0826897	-3.18707	0.00143722	0.0880359	RORB	S	Moderate (score=8.25)	4.77E-07
ENSMUSG00000023809	ENSMUSG00000023809.11	chr17:7437514-7570714	Rps6ka2	protein_coding	MGI:1342290	0.22456	0.0610102	3.6807	0.000232594	0.02756	RPS6KA2	S
ENSMUSG00000023927	ENSMUSG00000023927.16	chr17:52043215-52140318	Satb1	protein_coding	MGI:105084	-0.144961	0.0668106	-2.16974	0.0300269	0.492733	SATB1	S	Limited (score=2.5)
ENSMUSG00000075318	ENSMUSG00000075318.14	chr2:65451115-65597791	Scn2a	protein_coding	MGI:98248	0.126678	0.0616249	2.05563	0.0398183	0.562184	SCN2A	1	Definitive (score=109.3)	0
ENSMUSG00000024548	ENSMUSG00000024548.12	chr18:78793595-79152606	Setbp1	protein_coding	MGI:1933199	0.251007	0.0730549	3.43586	0.000590673	0.0493973	SETBP1	S
ENSMUSG00000030683	ENSMUSG00000030683.12	chr7:126549735-126569778	Sez6l2	protein_coding	MGI:2385295	-0.13171	0.0653247	-2.01624	0.0437754	0.582787	SEZ6L2	S
ENSMUSG00000005043	ENSMUSG00000005043.14	chr11:119234251-119246362	Sgsh	protein_coding	MGI:1350341	-0.181695	0.0926993	-1.96005	0.0499897	0.613754	SGSH	S
ENSMUSG00000031642	ENSMUSG00000031642.10	chr8:61676906-61849105	Sh3rf1	protein_coding	MGI:1913066	0.225482	0.0821546	2.74461	0.00605828	0.230865	SH3RF1	S
ENSMUSG00000037990	ENSMUSG00000037990.19	chr10:58649181-58974738	Sh3rf3	protein_coding	MGI:2444637	0.18239	0.0634498	2.87456	0.00404594	0.181147	SH3RF3	2
ENSMUSG00000037541	ENSMUSG00000037541.23	chr7:143555665-143978231	Shank2	protein_coding	MGI:2671987	0.215041	0.066382	3.23944	0.00119764	0.0779605	SHANK2	2	Definitive (score=18.55)	0.00016496
ENSMUSG00000026904	ENSMUSG00000026904.18	chr2:61876806-62157074	Slc4a10	protein_coding	MGI:2150150	0.138368	0.0567913	2.43644	0.0148328	0.364179	SLC4A10	2
ENSMUSG00000033214	ENSMUSG00000033214.11	chr14:111912529-111920573	Slitrk5	protein_coding	MGI:2679448	0.117089	0.0529957	2.20941	0.0271465	0.470144	SLITRK5	2
ENSMUSG00000029309	ENSMUSG00000029309.8	chr5:104226977-104261599	Sparcl1	protein_coding	MGI:108110	-0.107323	0.0496865	-2.16001	0.0307718	0.502642	SPARCL1	2
ENSMUSG00000027030	ENSMUSG00000027030.16	chr2:68040789-68302612	Stk39	protein_coding	MGI:1858416	-0.126966	0.0517096	-2.45537	0.014074	0.356213	STK39	2
ENSMUSG00000019790	ENSMUSG00000019790.18	chr10:9631291-9776823	Stxbp5	protein_coding	MGI:1926058	0.123316	0.058759	2.09867	0.0358458	0.535426	STXBP5	2
ENSMUSG00000009394	ENSMUSG00000009394.14	chr6:115111863-115258967	Syn2	protein_coding	MGI:103020	0.11247	0.054917	2.04801	0.0405592	0.564499	SYN2	2
ENSMUSG00000067629	ENSMUSG00000067629.14	chr17:27160227-27191408	Syngap1	protein_coding	MGI:3039785	0.136999	0.0537546	2.54861	0.0108154	0.317995	SYNGAP1	1	Definitive (score=40.75)	0
ENSMUSG00000022973	ENSMUSG00000022973.19	chr16:90732980-90808196	Synj1	protein_coding	MGI:1354961	0.143113	0.0574258	2.49214	0.0126974	0.335857	SYNJ1	2
ENSMUSG00000028030	ENSMUSG00000028030.13	chr3:132389905-132547449	Tbck	protein_coding	MGI:2445052	0.152275	0.0601041	2.53352	0.0112924	0.324863	TBCK	1	Limited (score=1)
ENSMUSG00000046982	ENSMUSG00000046982.12	chr18:84029752-84105831	Tshz1	protein_coding	MGI:1346031	0.144509	0.0650898	2.22015	0.0264087	0.462186	TSHZ1			0.0023426
ENSMUSG00000021198	ENSMUSG00000021198.17	chr12:102915118-103150324	Unc79	protein_coding	MGI:2684729	0.167543	0.0614265	2.72753	0.00638097	0.237738	UNC79	2
ENSMUSG00000022479	ENSMUSG00000022479.16	chr15:97752306-97808511	Vdr	protein_coding	MGI:103076	-0.778013	0.358749	-2.16868	0.0301067		VDR	2
ENSMUSG00000026175	ENSMUSG00000026175.13	chr1:74448535-74474718	Vil1	protein_coding	MGI:98930	-0.59797	0.271795	-2.20008	0.0278015		VIL1	2
ENSMUSG00000019831	ENSMUSG00000019831.15	chr10:40759471-40814566	Wasf1	protein_coding	MGI:1890563	0.124925	0.0504373	2.47684	0.013255	0.343593	WASF1	S
ENSMUSG00000041245	ENSMUSG00000041245.14	chrX:149981074-150103148	Wnk3	protein_coding	MGI:2652875	0.171438	0.0736841	2.32667	0.0199829	0.407418	WNK3	S
ENSMUSG00000066687	ENSMUSG00000066687.6	chr9:48565597-48747522	Zbtb16	protein_coding	MGI:103222	0.542482	0.125594	4.31932	1.56508e-05	0.00370474	ZBTB16	S
ENSMUSG00000039967	ENSMUSG00000039967.15	chr4:34803113-34882960	Zfp292	protein_coding	MGI:1353423	0.163701	0.0747687	2.18943	0.0285655	0.479501	ZNF292	S
ENSMUSG00000005125	ENSMUSG00000005125.14	chr15:66801167-66841489	Ndrg1	protein_coding	MGI:1341799	-0.326419	0.0542753	-6.01414	1.80839e-09	2.5256e-05
ENSMUSG00000041607	ENSMUSG00000041607.18	chr18:82493271-82603762	Mbp	protein_coding	MGI:96925	-0.336334	0.0582289	-5.77606	7.64702e-09	3.64466e-05
ENSMUSG00000020486	ENSMUSG00000020486.20	chr11:87457479-87481365	Septin4	protein_coding	MGI:1270156	-0.305431	0.053247	-5.73611	9.68744e-09	3.64466e-05
ENSMUSG00000020396	ENSMUSG00000020396.9	chr11:4888754-4898064	Nefh	protein_coding	MGI:97309	-0.40552	0.0708524	-5.72344	1.04387e-08	3.64466e-05
ENSMUSG00000032554	ENSMUSG00000032554.16	chr9:103081200-103107643	Trf	protein_coding	MGI:98821	-0.364362	0.0641618	-5.67879	1.35647e-08	3.7889e-05
ENSMUSG00000031425	ENSMUSG00000031425.16	chrX:135723420-135740482	Plp1	protein_coding	MGI:97623	-0.311567	0.0558233	-5.58131	2.38716e-08	5.55652e-05
ENSMUSG00000045087	ENSMUSG00000045087.9	chr9:21154208-21159739	S1pr5	protein_coding	MGI:2150641	-0.35807	0.0648062	-5.52525	3.29012e-08	6.56426e-05
ENSMUSG00000050063	ENSMUSG00000050063.19	chr7:43473923-43481454	Klk6	protein_coding	MGI:1343166	-0.706811	0.129537	-5.45644	4.85784e-08	8.29863e-05
ENSMUSG00000037625	ENSMUSG00000037625.8	chr3:31204069-31218473	Cldn11	protein_coding	MGI:106925	-0.289223	0.0531725	-5.43934	5.34782e-08	8.29863e-05
ENSMUSG00000037166	ENSMUSG00000037166.6	chr7:28988733-28993226	Ppp1r14a	protein_coding	MGI:1931139	-0.419445	0.0780959	-5.37091	7.83423e-08	9.94662e-05
ENSMUSG00000034714	ENSMUSG00000034714.10	chr11:114566257-114611803	Ttyh2	protein_coding	MGI:2157091	-0.300225	0.0563517	-5.3277	9.94633e-08	0.000115759
ENSMUSG00000022861	ENSMUSG00000022861.18	chr16:22287211-22475971	Dgkg	protein_coding	MGI:105060	0.445451	0.0848654	5.24891	1.53003e-07	0.000157255
ENSMUSG00000027562	ENSMUSG00000027562.13	chr3:14951333-14965830	Car2	protein_coding	MGI:88269	-0.288563	0.0550418	-5.24261	1.58318e-07	0.000157255
ENSMUSG00000018470	ENSMUSG00000018470.9	chr11:69217084-69223868	Kcnab3	protein_coding	MGI:1336208	-0.494826	0.0947357	-5.22323	1.75833e-07	0.000157255
ENSMUSG00000015806	ENSMUSG00000015806.13	chr5:45591363-45607578	Qdpr	protein_coding	MGI:97836	-0.292788	0.0561919	-5.21051	1.88325e-07	0.000157255
ENSMUSG00000032060	ENSMUSG00000032060.11	chr9:50662625-50667936	Cryab	protein_coding	MGI:88516	-0.418147	0.0802973	-5.20748	1.91418e-07	0.000157255
ENSMUSG00000030337	ENSMUSG00000030337.17	chr6:125192514-125222927	Vamp1	protein_coding	MGI:1313276	-0.334696	0.064738	-5.17001	2.34086e-07	0.000181624
ENSMUSG00000036634	ENSMUSG00000036634.16	chr7:30598601-30614298	Mag	protein_coding	MGI:96912	-0.287529	0.0559618	-5.13795	2.77748e-07	0.000198228
ENSMUSG00000007594	ENSMUSG00000007594.11	chr8:70536107-70543512	Hapln4	protein_coding	MGI:2679531	-0.328871	0.0640594	-5.13385	2.83873e-07	0.000198228
ENSMUSG00000030701	ENSMUSG00000030701.18	chr7:100292099-100311621	Plekhb1	protein_coding	MGI:1351469	-0.285936	0.0562755	-5.08102	3.75421e-07	0.000248089
ENSMUSG00000076439	ENSMUSG00000076439.13	chr17:37321635-37334290	Mog	protein_coding	MGI:97435	-0.292117	0.0576725	-5.0651	4.0818e-07	0.000248089
ENSMUSG00000047797	ENSMUSG00000047797.15	chrX:100419984-100429235	Gjb1	protein_coding	MGI:95719	-0.487962	0.0963416	-5.06492	4.08567e-07	0.000248089
ENSMUSG00000073982	ENSMUSG00000073982.12	chr7:101888330-101905261	Rhog	protein_coding	MGI:1928370	-0.30315	0.0602851	-5.02861	4.94055e-07	0.000275999
ENSMUSG00000018217	ENSMUSG00000018217.13	chr11:63019808-63050373	Pmp22	protein_coding	MGI:97631	-0.360943	0.0721587	-5.00207	5.6719e-07	0.000304669
ENSMUSG00000043448	ENSMUSG00000043448.14	chr11:59066394-59074039	Gjc2	protein_coding	MGI:2153060	-0.392331	0.0789499	-4.96937	6.71713e-07	0.00034745
ENSMUSG00000004894	ENSMUSG00000004894.11	chr3:87929057-87934890	Hapln2	protein_coding	MGI:2137300	-0.344962	0.0696325	-4.95403	7.26904e-07	0.000362569
ENSMUSG00000033579	ENSMUSG00000033579.17	chr8:112071767-112120456	Fa2h	protein_coding	MGI:2443327	-0.318562	0.0647183	-4.92228	8.55428e-07	0.000411962
ENSMUSG00000036777	ENSMUSG00000036777.9	chr9:22243308-22300484	Anln	protein_coding	MGI:1920174	-0.35001	0.0713057	-4.90859	9.17346e-07	0.000427055
ENSMUSG00000060716	ENSMUSG00000060716.8	chr12:79075937-79128429	Plekhh1	protein_coding	MGI:2144989	-0.333301	0.0685324	-4.8634	1.15385e-06	0.00051983
ENSMUSG00000049521	ENSMUSG00000049521.3	chr15:78726824-78735097	Cdc42ep1	protein_coding	MGI:1929763	-0.352117	0.0725781	-4.85156	1.22496e-06	0.000534619
ENSMUSG00000022425	ENSMUSG00000022425.17	chr15:54702297-54816288	Enpp2	protein_coding	MGI:1321390	-0.262531	0.0548644	-4.78508	1.70919e-06	0.000702077
ENSMUSG00000055945	ENSMUSG00000055945.9	chr17:8556291-8562945	Prr18	protein_coding	MGI:2443403	-0.309839	0.0648945	-4.77451	1.80146e-06	0.000713243
ENSMUSG00000022548	ENSMUSG00000022548.15	chr16:31115010-31133626	Apod	protein_coding	MGI:88056	-0.310844	0.0651608	-4.77041	1.83852e-06	0.000713243
ENSMUSG00000073680	ENSMUSG00000073680.3	chr4:155866048-155870331	Tmem88b	protein_coding	MGI:2444329	-0.311637	0.0655942	-4.75098	2.02438e-06	0.000742411
ENSMUSG00000031775	ENSMUSG00000031775.6	chr8:95401522-95422906	Pllp	protein_coding	MGI:1915051	-0.305797	0.0644555	-4.74432	2.09213e-06	0.000742411
ENSMUSG00000020099	ENSMUSG00000020099.9	chr10:60598372-60667360	Unc5b	protein_coding	MGI:894703	-0.290295	0.0612269	-4.74129	2.12361e-06	0.000742411
ENSMUSG00000026519	ENSMUSG00000026519.17	chr1:180769909-180802677	Tmem63a	protein_coding	MGI:2384789	-0.308978	0.065171	-4.74103	2.12634e-06	0.000742411
ENSMUSG00000030849	ENSMUSG00000030849.19	chr7:129764181-132725079	Fgfr2	protein_coding	MGI:95523	-0.292299	0.0620392	-4.71152	2.45876e-06	0.000837539
ENSMUSG00000000120	ENSMUSG00000000120.7	chr11:95459644-95478561	Ngfr	protein_coding	MGI:97323	-0.538998	0.114739	-4.69761	2.63222e-06	0.000875277
ENSMUSG00000032854	ENSMUSG00000032854.13	chr3:125658920-125732268	Ugt8a	protein_coding	MGI:109522	-0.299225	0.0646967	-4.62504	3.74534e-06	0.00121645
ENSMUSG00000039911	ENSMUSG00000039911.14	chr4:149980740-150039500	Spsb1	protein_coding	MGI:1921896	-0.297772	0.0646055	-4.60908	4.04462e-06	0.0012838
ENSMUSG00000000149	ENSMUSG00000000149.11	chr5:140744163-140816186	Gna12	protein_coding	MGI:95767	-0.232866	0.0510221	-4.56403	5.01813e-06	0.00153809
ENSMUSG00000020732	ENSMUSG00000020732.14	chr11:114982257-115053062	Rab37	protein_coding	MGI:1929945	-0.743005	0.162867	-4.56204	5.06602e-06	0.00153809
ENSMUSG00000059173	ENSMUSG00000059173.20	chr2:79664797-79959802	Pde1a	protein_coding	MGI:1201792	0.319593	0.070228	4.55079	5.34437e-06	0.00158807
ENSMUSG00000022500	ENSMUSG00000022500.16	chr16:10777139-10884021	Litaf	protein_coding	MGI:1929512	-0.301652	0.0665046	-4.53581	5.73827e-06	0.00164952
ENSMUSG00000103897	ENSMUSG00000103897.2	chr18:37858759-37974926	Pcdhga8	protein_coding	MGI:1935221	0.334541	0.07383	4.53123	5.86417e-06	0.00164952
ENSMUSG00000006782	ENSMUSG00000006782.17	chr11:100465730-100482555	Cnp	protein_coding	MGI:88437	-0.2603	0.0574645	-4.52975	5.90549e-06	0.00164952
ENSMUSG00000026421	ENSMUSG00000026421.15	chr1:135647799-135679970	Csrp1	protein_coding	MGI:88549	-0.242184	0.053649	-4.51423	6.35487e-06	0.00174024
ENSMUSG00000048572	ENSMUSG00000048572.6	chr19:24651372-24659597	Tmem252	protein_coding	MGI:3583948	-0.819959	0.181863	-4.50868	6.5233e-06	0.00175201
ENSMUSG00000037280	ENSMUSG00000037280.13	chr15:100589694-100627257	Galnt6	protein_coding	MGI:1891640	-0.296551	0.0666018	-4.45259	8.48409e-06	0.00223564
ENSMUSG00000046160	ENSMUSG00000046160.7	chr16:91066660-91068821	Olig1	protein_coding	MGI:1355334	-0.236898	0.0543837	-4.35605	1.32428e-05	0.00330266
ENSMUSG00000021779	ENSMUSG00000021779.20	chr14:4431611-4809435	Thrb	protein_coding	MGI:98743	0.273101	0.0627804	4.3501	1.36073e-05	0.00333402
ENSMUSG00000032766	ENSMUSG00000032766.10	chr6:4003904-4008445	Gng11	protein_coding	MGI:1913316	-0.432017	0.0997496	-4.33101	1.48424e-05	0.00357395
ENSMUSG00000028927	ENSMUSG00000028927.7	chr4:140633655-140679897	Padi2	protein_coding	MGI:1338892	-0.330305	0.0766215	-4.31086	1.62617e-05	0.00378519
ENSMUSG00000032841	ENSMUSG00000032841.16	chr2:101544630-101713372	Prr5l	protein_coding	MGI:1919696	-0.332529	0.0773283	-4.30022	1.70628e-05	0.00390654
ENSMUSG00000020604	ENSMUSG00000020604.14	chr11:109364200-109464156	Arsg	protein_coding	MGI:1921258	-0.296548	0.0695136	-4.26604	1.98974e-05	0.00448206
ENSMUSG00000021696	ENSMUSG00000021696.10	chr13:108350938-108422217	Elovl7	protein_coding	MGI:1921809	-0.297762	0.0701736	-4.24322	2.20338e-05	0.0048845
ENSMUSG00000019906	ENSMUSG00000019906.16	chr10:107107547-107257335	Lin7a	protein_coding	MGI:2135609	0.367777	0.086787	4.23769	2.25827e-05	0.00492796
ENSMUSG00000073125	ENSMUSG00000073125.11	chrX:72235813-72246536	Xlr3b	protein_coding	MGI:109505	1.04945	0.249963	4.19845	2.68752e-05	0.00576964
ENSMUSG00000105265	ENSMUSG00000105265.6	chr3:34158419-34736768	Sox2ot	lncRNA	MGI:2444112	-0.258229	0.0615537	-4.19518	2.72659e-05	0.00576964
ENSMUSG00000024661	ENSMUSG00000024661.8	chr19:9957962-9962462	Fth1	protein_coding	MGI:95588	-0.229256	0.0550695	-4.16303	3.14054e-05	0.00654638
ENSMUSG00000049493	ENSMUSG00000049493.14	chr9:95634695-95727364	Pls1	protein_coding	MGI:104809	-0.309613	0.0756589	-4.09222	4.27262e-05	0.00864155
ENSMUSG00000041309	ENSMUSG00000041309.18	chr7:139159292-139162713	Nkx6-2	protein_coding	MGI:1352738	-0.393107	0.0961038	-4.09044	4.30559e-05	0.00864155
ENSMUSG00000028246	ENSMUSG00000028246.14	chr4:21931329-21996839	Faxc	protein_coding	MGI:1923382	0.288784	0.0706235	4.08906	4.3313e-05	0.00864155
ENSMUSG00000020475	ENSMUSG00000020475.4	chr11:5751640-5753733	Pgam2	protein_coding	MGI:1933118	0.503185	0.123679	4.06847	4.73228e-05	0.00930859
ENSMUSG00000033713	ENSMUSG00000033713.13	chr12:99156337-99529841	Foxn3	protein_coding	MGI:1918625	-0.241362	0.05938	-4.06471	4.80926e-05	0.00932512
ENSMUSG00000037071	ENSMUSG00000037071.4	chr19:44382894-44396318	Scd1	protein_coding	MGI:98239	-0.231844	0.0570822	-4.06158	4.87422e-05	0.00932512
ENSMUSG00000075707	ENSMUSG00000075707.7	chr12:110245502-110247531	Dio3	protein_coding	MGI:1306782	1.21254	0.298723	4.05907	4.92687e-05
ENSMUSG00000033595	ENSMUSG00000033595.8	chr14:70768125-70775764	Lgi3	protein_coding	MGI:2182619	-0.196949	0.0485753	-4.05451	5.02393e-05	0.0093635
ENSMUSG00000047935	ENSMUSG00000047935.18	chr8:12435771-12486768	Sox1ot	lncRNA	MGI:3645522	0.369092	0.091037	4.0543	5.02837e-05	0.0093635
ENSMUSG00000033208	ENSMUSG00000033208.8	chr10:76089687-76096993	S100b	protein_coding	MGI:98217	-0.239214	0.0591141	-4.04664	5.19576e-05	0.00954789
ENSMUSG00000048022	ENSMUSG00000048022.12	chr6:24951140-24956296	Tmem229a	protein_coding	MGI:2442812	-0.215727	0.0535114	-4.03141	5.54431e-05	0.0100561
ENSMUSG00000015850	ENSMUSG00000015850.12	chr3:95583511-95595228	Adamtsl4	protein_coding	MGI:2389008	-0.323985	0.080478	-4.02576	5.67913e-05	0.0101686
ENSMUSG00000029335	ENSMUSG00000029335.6	chr5:99002274-99032255	Bmp3	protein_coding	MGI:88179	0.45478	0.113931	3.99172	6.55953e-05	0.0113222
ENSMUSG00000011884	ENSMUSG00000011884.14	chr5:114807459-114829045	Gltp	protein_coding	MGI:1929253	-0.25042	0.0627388	-3.99147	6.56663e-05	0.0113222
ENSMUSG00000049281	ENSMUSG00000049281.17	chr9:40180513-40202914	Scn3b	protein_coding	MGI:1918882	0.222322	0.0558629	3.97979	6.89769e-05	0.011748
ENSMUSG00000033006	ENSMUSG00000033006.11	chr15:79039108-79049440	Sox10	protein_coding	MGI:98358	-0.257274	0.0648631	-3.96641	7.29635e-05	0.0122772
ENSMUSG00000028542	ENSMUSG00000028542.18	chr4:117691703-117732395	Slc6a9	protein_coding	MGI:95760	-0.289255	0.073021	-3.96126	7.45556e-05	0.0123958
ENSMUSG00000032517	ENSMUSG00000032517.17	chr9:119978773-120010550	Mobp	protein_coding	MGI:108511	-0.266386	0.0679239	-3.92183	8.78792e-05	0.0142698
ENSMUSG00000078771	ENSMUSG00000078771.11	chr11:79417386-79421435	Evi2a	protein_coding	MGI:95458	-0.317286	0.0810192	-3.91618	8.99628e-05	0.0142775
ENSMUSG00000075415	ENSMUSG00000075415.14	chr2:30916218-31032020	Fnbp1	protein_coding	MGI:109606	-0.188591	0.0482198	-3.91106	9.18925e-05	0.0143574
ENSMUSG00000090061	ENSMUSG00000090061.10	chr5:63806445-63967889	Nwd2	protein_coding	MGI:1920464	0.418478	0.107047	3.9093	9.25653e-05	0.0143574
ENSMUSG00000044734	ENSMUSG00000044734.17	chr13:33026075-33035168	Serpinb1a	protein_coding	MGI:1913472	-0.33504	0.0857722	-3.90616	9.3776e-05	0.0143574
ENSMUSG00000046093	ENSMUSG00000046093.10	chr4:123077020-123088494	Hpcal4	protein_coding	MGI:2157521	0.219799	0.0563133	3.90314	9.49514e-05	0.0143574
ENSMUSG00000041377	ENSMUSG00000041377.13	chr6:120070311-120177300	Ninj2	protein_coding	MGI:1352751	-0.594981	0.152501	-3.90148	9.56062e-05	0.0143574
ENSMUSG00000030616	ENSMUSG00000030616.17	chr7:89951460-90059927	Sytl2	protein_coding	MGI:1933366	-0.221488	0.0572661	-3.86771	0.000109863	0.0159828
ENSMUSG00000020696	ENSMUSG00000020696.19	chr11:82693275-82762036	Rffl	protein_coding	MGI:1914588	-0.272892	0.0707171	-3.85893	0.000113884	0.0162878
ENSMUSG00000053025	ENSMUSG00000053025.14	chr7:74764642-74959010	Sv2b	protein_coding	MGI:1927338	0.231818	0.0600867	3.85806	0.000114292	0.0162878
ENSMUSG00000045664	ENSMUSG00000045664.6	chr19:5965664-5974844	Cdc42ep2	protein_coding	MGI:1929744	-0.347915	0.0904202	-3.84776	0.000119204	0.0168065
ENSMUSG00000035413	ENSMUSG00000035413.9	chr11:80701001-80712859	Tmem98	protein_coding	MGI:1923457	-0.297704	0.0775218	-3.84026	0.000122906	0.0169951
ENSMUSG00000072294	ENSMUSG00000072294.6	chr14:100108068-100522115	Klf12	protein_coding	MGI:1333796	0.270853	0.0708652	3.82208	0.00013233	0.0181188
ENSMUSG00000018166	ENSMUSG00000018166.9	chr10:128403392-128425521	Erbb3	protein_coding	MGI:95411	-0.294157	0.0771485	-3.81287	0.000137365	0.0186256
ENSMUSG00000026482	ENSMUSG00000026482.14	chr1:152392511-152642102	Rgl1	protein_coding	MGI:107484	0.207482	0.0547093	3.79244	0.000149173	0.0200322
ENSMUSG00000045246	ENSMUSG00000045246.12	chr8:120350593-120362419	Kcng4	protein_coding	MGI:1913983	-0.552435	0.146453	-3.77211	0.000161874	0.0215307
ENSMUSG00000041423	ENSMUSG00000041423.17	chr3:88271891-88275848	Paqr6	protein_coding	MGI:1916207	-0.425554	0.113037	-3.76472	0.000166738	0.0219685
ENSMUSG00000028962	ENSMUSG00000028962.15	chr5:24628835-24645948	Slc4a2	protein_coding	MGI:109351	-0.211918	0.0564827	-3.75191	0.000175495	0.0229062
ENSMUSG00000038173	ENSMUSG00000038173.16	chr8:47439922-47549797	Enpp6	protein_coding	MGI:2445171	-0.283023	0.075597	-3.74384	0.000181226	0.0233847
ENSMUSG00000003534	ENSMUSG00000003534.18	chr17:35992459-36015513	Ddr1	protein_coding	MGI:99216	-0.194784	0.0520524	-3.74207	0.00018251	0.0233847
ENSMUSG00000006301	ENSMUSG00000006301.18	chr1:74327406-74344781	Tmbim1	protein_coding	MGI:1916910	-0.246642	0.0659924	-3.73742	0.000185915	0.0236044
ENSMUSG00000022472	ENSMUSG00000022472.17	chr15:81876724-81918063	Desi1	protein_coding	MGI:106313	-0.190812	0.0513569	-3.71541	0.000202875	0.0255229
ENSMUSG00000061086	ENSMUSG00000061086.13	chr11:104441489-104486579	Myl4	protein_coding	MGI:97267	-0.541102	0.145725	-3.71317	0.00020468	0.0255229
ENSMUSG00000036528	ENSMUSG00000036528.17	chr7:107194414-107347790	Ppfibp2	protein_coding	MGI:894649	-0.326109	0.0879111	-3.70954	0.00020764	0.0256628
ENSMUSG00000032412	ENSMUSG00000032412.9	chr9:96214708-96246495	Atp1b3	protein_coding	MGI:107788	-0.182997	0.0493924	-3.70497	0.000211419	0.0259007
ENSMUSG00000022212	ENSMUSG00000022212.16	chr14:55747902-55754888	Cpne6	protein_coding	MGI:1334445	0.30248	0.0817076	3.70198	0.00021392	0.0259791
ENSMUSG00000040640	ENSMUSG00000040640.12	chr14:27344385-28200494	Erc2	protein_coding	MGI:1098749	0.205453	0.0557574	3.68476	0.000228917	0.02756
ENSMUSG00000033615	ENSMUSG00000033615.10	chr5:108666420-108697890	Cplx1	protein_coding	MGI:104727	-0.185449	0.0503882	-3.68041	0.000232857	0.02756
ENSMUSG00000058656	ENSMUSG00000058656.14	chr15:53317206-53765933	Samd12	protein_coding	MGI:2444518	0.255015	0.0693525	3.67709	0.000235912	0.027687
ENSMUSG00000020411	ENSMUSG00000020411.3	chr11:46038982-46057335	Nipal4	protein_coding	MGI:2444671	-0.388445	0.10593	-3.66698	0.000245428	0.0285637
ENSMUSG00000014846	ENSMUSG00000014846.13	chr8:106194125-106198158	Tppp3	protein_coding	MGI:1915221	-0.246004	0.0671981	-3.66088	0.000251348	0.0290109
ENSMUSG00000019194	ENSMUSG00000019194.16	chr7:30815949-30826428	Scn1b	protein_coding	MGI:98247	-0.205798	0.0563149	-3.65441	0.000257775	0.0295089
ENSMUSG00000015714	ENSMUSG00000015714.12	chr3:95222102-95230910	Cers2	protein_coding	MGI:1924143	-0.19325	0.0529734	-3.64806	0.000264224	0.0300012
ENSMUSG00000021451	ENSMUSG00000021451.17	chr13:51839565-51947783	Sema4d	protein_coding	MGI:109244	-0.187831	0.0515202	-3.64577	0.000266593	0.0300261
ENSMUSG00000032135	ENSMUSG00000032135.16	chr9:44045766-44054024	Mcam	protein_coding	MGI:1933966	-0.231905	0.063719	-3.63949	0.000273175	0.0305213
ENSMUSG00000037010	ENSMUSG00000037010.8	chrX:47114023-47123730	Apln	protein_coding	MGI:1353624	-0.272501	0.0750815	-3.6294	0.000284077	0.0314875
ENSMUSG00000036098	ENSMUSG00000036098.16	chr19:10185636-10218112	Myrf	protein_coding	MGI:2684944	-0.241748	0.0667115	-3.62379	0.000290321	0.0318855
ENSMUSG00000053024	ENSMUSG00000053024.15	chr1:132437165-132470994	Cntn2	protein_coding	MGI:104518	-0.233356	0.0644258	-3.62209	0.000292234	0.0318855
ENSMUSG00000038630	ENSMUSG00000038630.9	chr4:58943628-58958355	Zkscan16	protein_coding	MGI:3510405	0.338701	0.0937639	3.61227	0.000303526	0.0324034
ENSMUSG00000026879	ENSMUSG00000026879.15	chr2:35146392-35197904	Gsn	protein_coding	MGI:95851	-0.173867	0.0481371	-3.61192	0.000303941	0.0324034
ENSMUSG00000028680	ENSMUSG00000028680.15	chr4:116985852-116991160	Plk3	protein_coding	MGI:109604	-0.324415	0.0898861	-3.60917	0.000307174	0.0324124
ENSMUSG00000031714	ENSMUSG00000031714.10	chr8:81491067-81607148	Gab1	protein_coding	MGI:108088	-0.222142	0.0615709	-3.60792	0.000308667	0.0324124
ENSMUSG00000019647	ENSMUSG00000019647.17	chr18:47368665-47501937	Sema6a	protein_coding	MGI:1203727	-0.220027	0.0611707	-3.59693	0.000321989	0.0335589
ENSMUSG00000024816	ENSMUSG00000024816.13	chr19:5899730-5925302	Frmd8	protein_coding	MGI:1914707	-0.221054	0.0615087	-3.59386	0.00032582	0.0337067
ENSMUSG00000051985	ENSMUSG00000051985.13	chr1:135881316-135934080	Igfn1	protein_coding	MGI:3045352	0.880838	0.245601	3.58647	0.000335189	0.034421
ENSMUSG00000050854	ENSMUSG00000050854.10	chr4:118398138-118401241	Tmem125	protein_coding	MGI:1923409	-0.348294	0.097233	-3.58205	0.000340906	0.0347525
ENSMUSG00000048707	ENSMUSG00000048707.10	chr2:25152630-25159897	Tprn	protein_coding	MGI:2139535	-0.23948	0.0669283	-3.57816	0.000346017	0.0350179
ENSMUSG00000043301	ENSMUSG00000043301.17	chr16:94549495-94798560	Kcnj6	protein_coding	MGI:104781	0.416101	0.116356	3.5761	0.000348757	0.0350412
ENSMUSG00000011148	ENSMUSG00000011148.15	chr12:112586479-112607794	Adssl1	protein_coding	MGI:87947	-0.247479	0.0692825	-3.57203	0.000354229	0.0351254
ENSMUSG00000056966	ENSMUSG00000056966.8	chr5:137951723-137961360	Gjc3	protein_coding	MGI:2153041	-0.23242	0.0650797	-3.57131	0.000355194	0.0351254
ENSMUSG00000041556	ENSMUSG00000041556.9	chr4:148245078-148250881	Fbxo2	protein_coding	MGI:2446216	-0.186554	0.0522747	-3.56873	0.000358711	0.0351254
ENSMUSG00000042129	ENSMUSG00000042129.9	chr6:116609969-116650913	Rassf4	protein_coding	MGI:2386853	-0.366639	0.10279	-3.56688	0.000361262	0.0351254
ENSMUSG00000022096	ENSMUSG00000022096.15	chr14:70789652-70810988	Hr	protein_coding	MGI:96223	-0.265804	0.0745338	-3.56622	0.00036217	0.0351254
ENSMUSG00000030905	ENSMUSG00000030905.6	chr7:119785603-119801334	Crym	protein_coding	MGI:102675	0.255533	0.071974	3.55035	0.000384713	0.0370545
ENSMUSG00000020173	ENSMUSG00000020173.18	chr11:12186608-12414960	Cobl	protein_coding	MGI:105056	0.203331	0.0573912	3.5429	0.00039575	0.037599
ENSMUSG00000020774	ENSMUSG00000020774.10	chr11:73195818-73220422	Aspa	protein_coding	MGI:87914	-0.241125	0.0681179	-3.53982	0.000400403	0.037784
ENSMUSG00000057716	ENSMUSG00000057716.8	chr6:39848395-40232084	Tmem178b	protein_coding	MGI:3647581	0.272267	0.0770755	3.53247	0.000411701	0.0385894
ENSMUSG00000042216	ENSMUSG00000042216.14	chr5:113391086-113458652	Sgsm1	protein_coding	MGI:107320	0.269823	0.0764879	3.52765	0.000419268	0.0387991
ENSMUSG00000027215	ENSMUSG00000027215.14	chr2:93249456-93293485	Cd82	protein_coding	MGI:104651	-0.251033	0.0711835	-3.52656	0.00042099	0.0387991
ENSMUSG00000025202	ENSMUSG00000025202.9	chr19:44191708-44232455	Scd3	protein_coding	MGI:1353437	-0.441099	0.125131	-3.52511	0.000423305	0.0387991
ENSMUSG00000021448	ENSMUSG00000021448.9	chr13:51585077-51723523	Shc3	protein_coding	MGI:106179	0.247125	0.0701259	3.52402	0.000425051	0.0387991
ENSMUSG00000047747	ENSMUSG00000047747.11	chr8:83589985-83817897	Rnf150	protein_coding	MGI:2443860	0.206375	0.0586571	3.51833	0.000434274	0.0393836
ENSMUSG00000049721	ENSMUSG00000049721.15	chr11:3933636-3949326	Gal3st1	protein_coding	MGI:1858277	-0.30648	0.0871857	-3.51525	0.000439334	0.039467
ENSMUSG00000103793	ENSMUSG00000103793.2	chr18:37840092-37974926	Pcdhga6	protein_coding	MGI:1935218	0.291083	0.0828271	3.51434	0.000440845	0.039467
ENSMUSG00000050967	ENSMUSG00000050967.6	chr1:39657574-39690642	Creg2	protein_coding	MGI:1928333	0.218308	0.0624462	3.49595	0.000472383	0.0420211
ENSMUSG00000073557	ENSMUSG00000073557.13	chr1:134682396-134883680	Ppp1r12b	protein_coding	MGI:1916417	0.209362	0.060026	3.48786	0.000486909	0.0430391
ENSMUSG00000020023	ENSMUSG00000020023.19	chr10:94147811-94426818	Tmcc3	protein_coding	MGI:2442900	-0.201385	0.0578936	-3.47853	0.00050417	0.0440077
ENSMUSG00000030172	ENSMUSG00000030172.16	chr6:119547757-119825128	Erc1	protein_coding	MGI:2151013	0.212379	0.0612732	3.4661	0.000528073	0.0455252
ENSMUSG00000048537	ENSMUSG00000048537.17	chr9:44597601-44646495	Phldb1	protein_coding	MGI:2143230	-0.19265	0.0556554	-3.46148	0.000537204	0.0460282
ENSMUSG00000024810	ENSMUSG00000024810.17	chr19:29902514-29938118	Il33	protein_coding	MGI:1924375	-0.231508	0.0669133	-3.45982	0.000540527	0.0460305
ENSMUSG00000020811	ENSMUSG00000020811.17	chr11:71640746-71680473	Wscd1	protein_coding	MGI:2448493	-0.17321	0.0501516	-3.45372	0.000552902	0.0467088
ENSMUSG00000055717	ENSMUSG00000055717.14	chr14:103887664-103942343	Slain1	protein_coding	MGI:2145578	-0.198223	0.0577721	-3.43111	0.000601111	0.0499709
ENSMUSG00000037031	ENSMUSG00000037031.11	chr10:62021175-62067030	Tspan15	protein_coding	MGI:1917673	-0.220249	0.0642223	-3.42948	0.00060474	0.0499751
ENSMUSG00000037295	ENSMUSG00000037295.8	chr4:134468865-134495335	Ldlrap1	protein_coding	MGI:2140175	-0.335167	0.0981106	-3.41621	0.000634982	0.0516207
ENSMUSG00000026185	ENSMUSG00000026185.9	chr1:72897091-72914043	Igfbp5	protein_coding	MGI:96440	-0.174209	0.0509986	-3.41595	0.000635599	0.0516207
ENSMUSG00000118099	ENSMUSG00000118099.2	chr19:55087934-55106247	Gm31356	lncRNA	MGI:5590515	0.451202	0.132114	3.41524	0.00063725	0.0516207
ENSMUSG00000034336	ENSMUSG00000034336.4	chr19:47003137-47013766	Ina	protein_coding	MGI:96568	-0.183589	0.0537704	-3.41431	0.000639437	0.0516207
ENSMUSG00000022090	ENSMUSG00000022090.11	chr14:70401667-70415130	Pdlim2	protein_coding	MGI:2384850	-0.258156	0.075723	-3.40921	0.000651503	0.0522925
ENSMUSG00000062591	ENSMUSG00000062591.6	chr17:57387066-57394782	Tubb4a	protein_coding	MGI:107848	-0.175915	0.0517043	-3.40234	0.000668119	0.0533197
ENSMUSG00000048482	ENSMUSG00000048482.15	chr2:109505045-109557352	Bdnf	protein_coding	MGI:88145	0.389356	0.114799	3.39165	0.000694744	0.0551295
ENSMUSG00000022864	ENSMUSG00000022864.15	chr16:78337226-78373596	D16Ertd472e	protein_coding	MGI:1196400	-0.275558	0.0812898	-3.38983	0.000699369	0.055183
ENSMUSG00000020331	ENSMUSG00000020331.10	chr10:79552468-79571942	Hcn2	protein_coding	MGI:1298210	-0.220889	0.0653261	-3.38133	0.000721362	0.0563797
ENSMUSG00000001323	ENSMUSG00000001323.18	chr11:74797185-74816774	Srr	protein_coding	MGI:1351636	0.173487	0.0513145	3.38085	0.00072261	0.0563797
ENSMUSG00000053475	ENSMUSG00000053475.6	chr2:51928021-51946698	Tnfaip6	protein_coding	MGI:1195266	-0.260155	0.0770206	-3.37773	0.000730871	0.056521
ENSMUSG00000002324	ENSMUSG00000002324.9	chr14:55855494-55862852	Rec8	protein_coding	MGI:1929645	0.476404	0.141121	3.37585	0.000735893	0.056521
ENSMUSG00000046546	ENSMUSG00000046546.4	chr16:30418541-30421615	Fam43a	protein_coding	MGI:2676309	-0.269015	0.0796941	-3.3756	0.000736562	0.056521
ENSMUSG00000024053	ENSMUSG00000024053.12	chr17:71559167-71618973	Emilin2	protein_coding	MGI:2389136	-0.36057	0.107266	-3.36147	0.000775288	0.0591676
ENSMUSG00000038526	ENSMUSG00000038526.15	chr3:95805080-95812003	Car14	protein_coding	MGI:1344341	-0.292594	0.0871985	-3.35549	0.000792235	0.0601324
ENSMUSG00000026463	ENSMUSG00000026463.18	chr1:133627195-133728779	Atp2b4	protein_coding	MGI:88111	0.473963	0.141772	3.34313	0.000828392	0.0620939
ENSMUSG00000022829	ENSMUSG00000022829.15	chr16:36935304-37205324	Stxbp5l	protein_coding	MGI:2443815	0.312485	0.093499	3.34212	0.000831416	0.0620939
ENSMUSG00000036503	ENSMUSG00000036503.14	chr3:57643483-57742654	Rnf13	protein_coding	MGI:1346341	-0.184793	0.0553403	-3.33922	0.00084015	0.0623691
ENSMUSG00000105891	ENSMUSG00000105891.5	chr3:102169721-102352448	A230001M10Rik	lncRNA	MGI:2443043	-0.390213	0.116903	-3.33794	0.000844032	0.0623691
ENSMUSG00000024516	ENSMUSG00000024516.14	chr18:65933586-65950755	Sec11c	protein_coding	MGI:1913536	-0.205479	0.0616468	-3.33317	0.000858628	0.0631137
ENSMUSG00000028412	ENSMUSG00000028412.18	chr4:53440413-53622478	Slc44a1	protein_coding	MGI:2140592	-0.195264	0.0586778	-3.32774	0.000875548	0.0633873
ENSMUSG00000028445	ENSMUSG00000028445.8	chr4:41638144-41640324	Enho	protein_coding	MGI:1916888	-0.199919	0.0600836	-3.32735	0.000876765	0.0633873
ENSMUSG00000008734	ENSMUSG00000008734.10	chr7:118571270-118594434	Gprc5b	protein_coding	MGI:1927596	-0.164867	0.0495595	-3.32665	0.000878962	0.0633873
ENSMUSG00000033066	ENSMUSG00000033066.18	chr11:67345917-67575800	Gas7	protein_coding	MGI:1202388	0.204798	0.0615719	3.32616	0.000880505	0.0633873
ENSMUSG00000029723	ENSMUSG00000029723.17	chr5:137743992-137766712	Tsc22d4	protein_coding	MGI:1926079	-0.168705	0.0507735	-3.3227	0.000891495	0.0638493
ENSMUSG00000031028	ENSMUSG00000031028.15	chr7:108549545-108633667	Tub	protein_coding	MGI:2651573	0.209841	0.0634357	3.30793	0.000939893	0.0668967
ENSMUSG00000052609	ENSMUSG00000052609.10	chr12:76577665-76627262	Plekhg3	protein_coding	MGI:2388284	-0.216262	0.0654089	-3.30631	0.000945321	0.0668967
ENSMUSG00000049265	ENSMUSG00000049265.9	chr5:30745514-30782615	Kcnk3	protein_coding	MGI:1100509	-0.26388	0.0798329	-3.3054	0.000948414	0.0668967
ENSMUSG00000020183	ENSMUSG00000020183.12	chr10:117465405-117523257	Cpm	protein_coding	MGI:1917824	-0.263102	0.0796809	-3.30195	0.000960153	0.0673844
ENSMUSG00000040164	ENSMUSG00000040164.4	chr2:164005539-164013033	Kcns1	protein_coding	MGI:1197019	-0.283725	0.0861182	-3.2946	0.000985632	0.0688267
ENSMUSG00000030878	ENSMUSG00000030878.12	chr7:120556259-120581535	Cdr2	protein_coding	MGI:1100885	-0.249904	0.0759383	-3.29088	0.000998741	0.0693951
ENSMUSG00000059602	ENSMUSG00000059602.15	chr10:85890989-86334760	Syn3	protein_coding	MGI:1351334	0.327516	0.0995807	3.28895	0.00100562	0.0695269
ENSMUSG00000044071	ENSMUSG00000044071.10	chr10:123099901-123577109	Tafa2	protein_coding	MGI:2143691	0.340482	0.103656	3.28473	0.00102079	0.0701812
ENSMUSG00000053279	ENSMUSG00000053279.9	chr19:20470079-20620829	Aldh1a1	protein_coding	MGI:1353450	-0.295105	0.0898741	-3.28354	0.00102513	0.0701812
ENSMUSG00000017734	ENSMUSG00000017734.16	chr2:164328026-164335239	Dbndd2	protein_coding	MGI:106562	-0.173073	0.0527791	-3.27919	0.00104104	0.0709231
ENSMUSG00000050121	ENSMUSG00000050121.10	chr19:41050149-41065552	Opalin	protein_coding	MGI:2657025	-0.266551	0.0813422	-3.27691	0.0010495	0.0711524
ENSMUSG00000023990	ENSMUSG00000023990.19	chr17:48047955-48103344	Tfeb	protein_coding	MGI:103270	-0.283645	0.0866079	-3.27505	0.00105644	0.0712764
ENSMUSG00000060314	ENSMUSG00000060314.14	chr7:140387362-140402091	Zfp941	protein_coding	MGI:3039601	0.317952	0.0971626	3.27237	0.00106649	0.0716089
ENSMUSG00000047773	ENSMUSG00000047773.16	chr11:89281049-89732092	Ankfn1	protein_coding	MGI:2686021	0.644034	0.197061	3.26819	0.00108239	0.0723282
ENSMUSG00000030189	ENSMUSG00000030189.16	chr6:131341818-131365439	Ybx3	protein_coding	MGI:2137670	-0.234941	0.0722325	-3.25257	0.00114366	0.0757811
ENSMUSG00000044447	ENSMUSG00000044447.6	chr14:67989584-68170891	Dock5	protein_coding	MGI:2652871	-0.283517	0.0871754	-3.25226	0.00114491	0.0757811
ENSMUSG00000048782	ENSMUSG00000048782.17	chr7:114342929-114449618	Insc	protein_coding	MGI:1917942	-0.311697	0.0958968	-3.25034	0.00115266	0.0759345
ENSMUSG00000005716	ENSMUSG00000005716.17	chr15:78075314-78090600	Pvalb	protein_coding	MGI:97821	-0.619642	0.191024	-3.24378	0.00117953	0.0773393
ENSMUSG00000034488	ENSMUSG00000034488.15	chr13:88969591-89471342	Edil3	protein_coding	MGI:1329025	-0.17413	0.0537766	-3.23802	0.00120363	0.0779605
ENSMUSG00000069227	ENSMUSG00000069227.5	chr13:54884484-54897687	Gprin1	protein_coding	MGI:1349455	0.227528	0.0702786	3.23752	0.00120575	0.0779605
ENSMUSG00000022055	ENSMUSG00000022055.8	chr14:68321312-68326544	Nefl	protein_coding	MGI:97313	-0.173702	0.0537124	-3.23393	0.00122101	0.0785838
ENSMUSG00000049148	ENSMUSG00000049148.9	chr15:4404973-4605035	Plcxd3	protein_coding	MGI:2442605	0.492378	0.152384	3.23117	0.00123285	0.0789814
ENSMUSG00000027375	ENSMUSG00000027375.15	chr2:127475146-127498615	Mal	protein_coding	MGI:892970	-0.216487	0.0670489	-3.22879	0.00124317	0.079279
ENSMUSG00000036046	ENSMUSG00000036046.15	chr15:84828137-84872752	5031439G07Rik	protein_coding	MGI:2444899	-0.175201	0.0544224	-3.21928	0.00128512	0.0812309
ENSMUSG00000038375	ENSMUSG00000038375.16	chr2:155222979-155231770	Trp53inp2	protein_coding	MGI:1915978	-0.17319	0.0538148	-3.21826	0.00128971	0.0812309
ENSMUSG00000022324	ENSMUSG00000022324.16	chr15:34306823-34436419	Matn2	protein_coding	MGI:109613	0.387772	0.120504	3.21792	0.00129123	0.0812309
ENSMUSG00000025584	ENSMUSG00000025584.18	chr7:80863344-80984281	Pde8a	protein_coding	MGI:1277116	-0.222977	0.069374	-3.21413	0.00130841	0.0817399
ENSMUSG00000022546	ENSMUSG00000022546.6	chr15:76579916-76583886	Gpt	protein_coding	MGI:95802	-0.266657	0.0830119	-3.21228	0.00131687	0.0817399
ENSMUSG00000025351	ENSMUSG00000025351.15	chr10:128736858-128748691	Cd63	protein_coding	MGI:99529	-0.17274	0.0538477	-3.20794	0.00133689	0.0826151
ENSMUSG00000060402	ENSMUSG00000060402.9	chr7:34373893-34512136	Chst8	protein_coding	MGI:1916197	-0.436587	0.136405	-3.20066	0.00137112	0.0843569
ENSMUSG00000015149	ENSMUSG00000015149.15	chr7:28466160-28488086	Sirt2	protein_coding	MGI:1927664	-0.151937	0.0477032	-3.18504	0.00144734	0.0882117
ENSMUSG00000031385	ENSMUSG00000031385.15	chrX:72800696-72816120	Plxnb3	protein_coding	MGI:2154240	-0.268914	0.0844587	-3.18397	0.00145272	0.0882117
ENSMUSG00000019055	ENSMUSG00000019055.16	chr4:147994210-148021224	Plod1	protein_coding	MGI:99907	-0.23783	0.0747724	-3.18072	0.00146909	0.0888192
ENSMUSG00000026163	ENSMUSG00000026163.18	chr1:83231860-83385921	Sphkap	protein_coding	MGI:1924879	0.278803	0.087859	3.1733	0.00150718	0.0907297
ENSMUSG00000067279	ENSMUSG00000067279.4	chr19:36709131-36714053	Ppp1r3c	protein_coding	MGI:1858229	-0.216365	0.0683583	-3.16516	0.00155	0.0923725
ENSMUSG00000090086	ENSMUSG00000090086.8	chr5:123271786-123279729	AI480526	lncRNA	MGI:2140910	0.259187	0.0819057	3.16445	0.00155375	0.0923725
ENSMUSG00000040605	ENSMUSG00000040605.8	chr16:97157942-97244136	Bace2	protein_coding	MGI:1860440	-0.359817	0.11371	-3.16435	0.00155431	0.0923725
ENSMUSG00000027858	ENSMUSG00000027858.14	chr3:102641845-102708829	Tspan2	protein_coding	MGI:1917997	-0.19077	0.0605105	-3.15268	0.0016178	0.095738
ENSMUSG00000021303	ENSMUSG00000021303.15	chr13:13958644-14002481	Gng4	protein_coding	MGI:102703	0.277342	0.0880231	3.15078	0.00162833	0.0959548
ENSMUSG00000025597	ENSMUSG00000025597.14	chrX:113384030-113470526	Klhl4	protein_coding	MGI:2442829	-0.208723	0.0663708	-3.14481	0.00166194	0.097261
ENSMUSG00000024172	ENSMUSG00000024172.11	chr17:55752383-55821582	St6gal2	protein_coding	MGI:2445190	0.186266	0.0592379	3.14437	0.00166443	0.097261
ENSMUSG00000040759	ENSMUSG00000040759.10	chr14:55173718-55176731	Cmtm5	protein_coding	MGI:2447164	-0.199154	0.0634319	-3.13966	0.00169146	0.0981354
ENSMUSG00000041380	ENSMUSG00000041380.14	chrX:145745509-145980273	Htr2c	protein_coding	MGI:96281	0.241551	0.0770019	3.13695	0.00170717	0.0981354
ENSMUSG00000024597	ENSMUSG00000024597.12	chr18:58011750-58079893	Slc12a2	protein_coding	MGI:101924	-0.211172	0.0673188	-3.13689	0.0017075	0.0981354
ENSMUSG00000039058	ENSMUSG00000039058.12	chr3:152168452-152373997	Ak5	protein_coding	MGI:2677491	0.241539	0.0771311	3.13153	0.00173896	0.0995339
ENSMUSG00000042680	ENSMUSG00000042680.9	chr18:21260258-21433195	Garem1	protein_coding	MGI:2685790	0.229318	0.0733354	3.12697	0.00176615	0.100524
ENSMUSG00000037138	ENSMUSG00000037138.19	chr1:38216407-38704036	Aff3	protein_coding	MGI:106927	0.19885	0.0636069	3.12623	0.00177065	0.100524
ENSMUSG00000027438	ENSMUSG00000027438.15	chr2:148535905-148574387	Napb	protein_coding	MGI:104562	0.150854	0.0483134	3.1224	0.00179381	0.101427
ENSMUSG00000040373	ENSMUSG00000040373.13	chr11:107765431-107805881	Cacng5	protein_coding	MGI:2157946	0.376134	0.12067	3.11704	0.00182676	0.102873
ENSMUSG00000038495	ENSMUSG00000038495.15	chr3:96011839-96068446	Otud7b	protein_coding	MGI:2654703	-0.19863	0.063932	-3.10689	0.00189068	0.106045
ENSMUSG00000027335	ENSMUSG00000027335.10	chr2:131387770-131404203	Adra1d	protein_coding	MGI:106673	-0.417119	0.134427	-3.10294	0.00191606	0.106851
ENSMUSG00000047205	ENSMUSG00000047205.13	chr11:3845240-3851296	Dusp18	protein_coding	MGI:1922469	0.189136	0.0609666	3.10228	0.00192035	0.106851
ENSMUSG00000043298	ENSMUSG00000043298.9	chr6:136806925-136812450	Smco3	protein_coding	MGI:2443451	-0.311488	0.100567	-3.09733	0.00195273	0.108222
ENSMUSG00000074634	ENSMUSG00000074634.13	chr13:119624575-120072595	Tmem267	protein_coding	MGI:3648543	0.267025	0.0863887	3.09097	0.00199504	0.110129
ENSMUSG00000021721	ENSMUSG00000021721.6	chr13:105580147-105584630	Htr1a	protein_coding	MGI:96273	0.318859	0.103218	3.08919	0.00200702	0.110355
ENSMUSG00000051726	ENSMUSG00000051726.7	chr12:17222101-17226889	Kcnf1	protein_coding	MGI:2687399	0.18895	0.0612717	3.0838	0.00204377	0.111934
ENSMUSG00000045761	ENSMUSG00000045761.17	chr17:71980256-72036664	Togaram2	protein_coding	MGI:2443498	0.442329	0.143643	3.07936	0.00207447	0.112732
ENSMUSG00000053550	ENSMUSG00000053550.14	chr7:4828551-4847695	Shisa7	protein_coding	MGI:3605641	0.163384	0.0532285	3.06949	0.00214427	0.116073
ENSMUSG00000015354	ENSMUSG00000015354.9	chr9:95519654-95580149	Pcolce2	protein_coding	MGI:1923727	-0.346127	0.113034	-3.06215	0.00219757	0.118499
ENSMUSG00000030342	ENSMUSG00000030342.9	chr6:125437229-125471754	Cd9	protein_coding	MGI:88348	-0.171389	0.0562894	-3.04479	0.00232846	0.125074
ENSMUSG00000078532	ENSMUSG00000078532.10	chr4:130297197-130339644	Nkain1	protein_coding	MGI:1914399	-0.211796	0.0695869	-3.04362	0.00233753	0.12508
ENSMUSG00000024197	ENSMUSG00000024197.11	chr17:56584476-56599873	Plin3	protein_coding	MGI:1914155	-0.272889	0.089781	-3.0395	0.0023697	0.126318
ENSMUSG00000001542	ENSMUSG00000001542.8	chr13:75854876-75920483	Ell2	protein_coding	MGI:2183438	-0.190044	0.0628132	-3.02554	0.00248188	0.131794
ENSMUSG00000001334	ENSMUSG00000001334.10	chr4:129030792-129038386	Fndc5	protein_coding	MGI:1917614	-0.198467	0.0656244	-3.02429	0.00249216	0.131839
ENSMUSG00000045174	ENSMUSG00000045174.11	chr1:34618738-34630025	Amer3	protein_coding	MGI:3026939	0.202964	0.0674643	3.00847	0.00262566	0.137857
ENSMUSG00000034402	ENSMUSG00000034402.4	chr12:74943994-75224106	Kcnh5	protein_coding	MGI:3584508	0.293265	0.097522	3.00717	0.00263691	0.137929
ENSMUSG00000022773	ENSMUSG00000022773.20	chr16:16887560-16904909	Ypel1	protein_coding	MGI:1913303	0.287272	0.0958714	2.99643	0.00273161	0.141377
ENSMUSG00000033316	ENSMUSG00000033316.15	chr5:110692221-110769246	Galnt9	protein_coding	MGI:2677965	-0.232765	0.0777144	-2.99513	0.00274331	0.141377
ENSMUSG00000038936	ENSMUSG00000038936.14	chr1:179495775-179514754	Sccpdh	protein_coding	MGI:1924486	-0.165724	0.0554207	-2.99029	0.00278716	0.142962
ENSMUSG00000026255	ENSMUSG00000026255.16	chr1:87192085-87238561	Efhd1	protein_coding	MGI:1921607	-0.221123	0.0739671	-2.98948	0.00279455	0.142962
ENSMUSG00000046607	ENSMUSG00000046607.7	chr5:118302713-118327543	Hrk	protein_coding	MGI:1201608	0.172184	0.057627	2.9879	0.00280904	0.143179
ENSMUSG00000064179	ENSMUSG00000064179.14	chr7:4507569-4519381	Tnnt1	protein_coding	MGI:1333868	-0.701429	0.234923	-2.98578	0.00282855	0.143649
ENSMUSG00000062960	ENSMUSG00000062960.11	chr5:76093487-76139118	Kdr	protein_coding	MGI:96683	-0.249817	0.0837669	-2.98229	0.00286105	0.144293
ENSMUSG00000042155	ENSMUSG00000042155.4	chr2:69652288-69666995	Klhl23	protein_coding	MGI:2683536	0.163799	0.0549258	2.98219	0.0028619	0.144293
ENSMUSG00000031661	ENSMUSG00000031661.13	chr8:89247982-89321512	Nkd1	protein_coding	MGI:2135954	-0.233199	0.0783941	-2.9747	0.00293278	0.147335
ENSMUSG00000051951	ENSMUSG00000051951.6	chr1:3276124-3741721	Xkr4	protein_coding	MGI:3528744	0.305008	0.102573	2.97356	0.00294368	0.147353
ENSMUSG00000062184	ENSMUSG00000062184.12	chrX:50476089-50770733	Hs6st2	protein_coding	MGI:1354959	0.161106	0.0542286	2.97087	0.00296953	0.147765
ENSMUSG00000009734	ENSMUSG00000009734.19	chr13:18295683-18572271	Pou6f2	protein_coding	MGI:2443631	-0.421898	0.142029	-2.97051	0.00297307	0.147765
ENSMUSG00000042846	ENSMUSG00000042846.9	chr10:63764251-63926056	Lrrtm3	protein_coding	MGI:2389177	0.189405	0.0638551	2.96617	0.00301534	0.149189
ENSMUSG00000053963	ENSMUSG00000053963.8	chr1:180259952-180311069	Stum	protein_coding	MGI:2138735	0.208859	0.0704325	2.96538	0.0030231	0.149189
ENSMUSG00000085224	ENSMUSG00000085224.3	chr2:31523465-31530601	Gm13425	lncRNA	MGI:3649915	2.47751	0.836623	2.96133	0.00306318
ENSMUSG00000091735	ENSMUSG00000091735.3	chr9:106341161-106343137	Gpr62	protein_coding	MGI:3525078	-0.269421	0.0911392	-2.95615	0.00311501	0.153184
ENSMUSG00000042596	ENSMUSG00000042596.8	chr1:19173246-19236570	Tfap2d	protein_coding	MGI:2153466	1.0253	0.348015	2.94613	0.00321776
ENSMUSG00000042523	ENSMUSG00000042523.13	chr12:84161140-84194272	Dnal1	protein_coding	MGI:1921462	0.155073	0.0526387	2.94599	0.00321919	0.157752
ENSMUSG00000000125	ENSMUSG00000000125.6	chr11:103664976-103708783	Wnt3	protein_coding	MGI:98955	-0.419194	0.142364	-2.94453	0.00323445	0.157945
ENSMUSG00000056553	ENSMUSG00000056553.15	chr12:116449340-117240469	Ptprn2	protein_coding	MGI:107418	0.161183	0.0547929	2.94167	0.00326448	0.158856
ENSMUSG00000049649	ENSMUSG00000049649.9	chr4:132936651-132939847	Gpr3	protein_coding	MGI:101908	-0.325866	0.111017	-2.93528	0.00333252	0.161128
ENSMUSG00000050069	ENSMUSG00000050069.4	chr1:174661351-174749385	Grem2	protein_coding	MGI:1344367	0.183957	0.0626882	2.93447	0.00334113	0.161128
ENSMUSG00000036304	ENSMUSG00000036304.15	chr16:43785396-43800154	Zdhhc23	protein_coding	MGI:2685625	0.232065	0.0790939	2.93404	0.00334578	0.161128
ENSMUSG00000036390	ENSMUSG00000036390.9	chr6:67012080-67014441	Gadd45a	protein_coding	MGI:107799	-0.358576	0.122322	-2.9314	0.00337435	0.161391
ENSMUSG00000049107	ENSMUSG00000049107.14	chr6:126078375-126143873	Ntf3	protein_coding	MGI:97380	1.70148	0.581178	2.92764	0.0034154
ENSMUSG00000022091	ENSMUSG00000022091.7	chr14:70417917-70449438	Sorbs3	protein_coding	MGI:700013	-0.17064	0.0583776	-2.92304	0.00346637	0.165226
ENSMUSG00000039735	ENSMUSG00000039735.17	chr3:122332368-122413364	Fnbp1l	protein_coding	MGI:1925642	0.183546	0.0628237	2.9216	0.00348236	0.165424
ENSMUSG00000032289	ENSMUSG00000032289.16	chr9:59874214-60429329	Thsd4	protein_coding	MGI:2672033	0.338452	0.11619	2.91292	0.00358069	0.169298
ENSMUSG00000003746	ENSMUSG00000003746.17	chr10:53780881-53952705	Man1a	protein_coding	MGI:104677	0.156926	0.0538843	2.91227	0.00358815	0.169298
ENSMUSG00000025019	ENSMUSG00000025019.18	chr19:41471076-41574975	Lcor	protein_coding	MGI:2443930	0.299959	0.103042	2.91103	0.00360244	0.1694
ENSMUSG00000006403	ENSMUSG00000006403.14	chr1:171077990-171088206	Adamts4	protein_coding	MGI:1339949	-0.183135	0.0629559	-2.90894	0.00362653	0.169667
ENSMUSG00000031870	ENSMUSG00000031870.17	chr9:8899834-8968612	Pgr	protein_coding	MGI:97567	0.205623	0.0706989	2.90844	0.00363241	0.169667
ENSMUSG00000045625	ENSMUSG00000045625.6	chr16:31752669-31764864	Pigz	protein_coding	MGI:2443822	-0.2924	0.100613	-2.90617	0.00365879	0.170329
ENSMUSG00000016918	ENSMUSG00000016918.16	chr1:12762501-12931416	Sulf1	protein_coding	MGI:2138563	0.225142	0.0775096	2.9047	0.00367603	0.170563
ENSMUSG00000029554	ENSMUSG00000029554.16	chr5:139994444-140307307	Mad1l1	protein_coding	MGI:1341857	-0.201785	0.0695014	-2.90332	0.00369232	0.170752
ENSMUSG00000100975	ENSMUSG00000100975.3	chr12:104891760-104892948	Gm28875	lncRNA	MGI:5579581	-0.803957	0.276936	-2.90304	0.00369554
ENSMUSG00000043659	ENSMUSG00000043659.12	chr9:24009292-24227694	Npsr1	protein_coding	MGI:2441738	0.7603	0.262128	2.9005	0.0037257	0.171726
ENSMUSG00000038916	ENSMUSG00000038916.8	chr10:29019835-29075626	Soga3	protein_coding	MGI:1914662	0.151379	0.0523529	2.89151	0.00383394	0.176134
ENSMUSG00000045404	ENSMUSG00000045404.17	chr12:99930758-100028941	Kcnk13	protein_coding	MGI:2384976	-0.234134	0.0810979	-2.88706	0.00388864	0.178062
ENSMUSG00000033904	ENSMUSG00000033904.17	chr7:118311775-118336247	Ccp110	protein_coding	MGI:2141942	-0.148659	0.051543	-2.88418	0.00392437	0.17911
ENSMUSG00000035566	ENSMUSG00000035566.8	chr14:84681003-84776442	Pcdh17	protein_coding	MGI:2684924	0.206628	0.0716682	2.88313	0.00393751	0.179125
ENSMUSG00000035891	ENSMUSG00000035891.17	chr15:86023329-86070342	Cerk	protein_coding	MGI:2386052	-0.160865	0.0559223	-2.87657	0.00402021	0.181147
ENSMUSG00000027977	ENSMUSG00000027977.16	chr3:123319815-123484502	Ndst3	protein_coding	MGI:1932544	0.389833	0.135591	2.87506	0.00403945	0.181147
ENSMUSG00000046668	ENSMUSG00000046668.10	chr18:35962450-35994741	Cxxc5	protein_coding	MGI:1914643	-0.156608	0.054482	-2.87449	0.00404683	0.181147
ENSMUSG00000062232	ENSMUSG00000062232.15	chr3:78969823-79193824	Rapgef2	protein_coding	MGI:2659071	0.172852	0.0601904	2.87174	0.00408214	0.182144
ENSMUSG00000031168	ENSMUSG00000031168.15	chrX:8051568-8059751	Ebp	protein_coding	MGI:107822	-0.220581	0.0769418	-2.86685	0.00414575	0.18409
ENSMUSG00000026796	ENSMUSG00000026796.17	chr2:32766126-32815266	Niban2	protein_coding	MGI:2442910	-0.164416	0.0573605	-2.86637	0.00415211	0.18409
ENSMUSG00000039395	ENSMUSG00000039395.9	chr1:72198601-72251466	Mreg	protein_coding	MGI:2151839	-0.446765	0.155967	-2.86449	0.00417675	0.184597
ENSMUSG00000039037	ENSMUSG00000039037.6	chr3:152522718-152687883	St6galnac5	protein_coding	MGI:1349471	0.216517	0.0756423	2.86238	0.0042047	0.185245
ENSMUSG00000090053	ENSMUSG00000090053.10	chr4:57434247-57712016	Pakap	protein_coding	MGI:5141924	0.253208	0.0885107	2.86076	0.00422629	0.185422
ENSMUSG00000040624	ENSMUSG00000040624.19	chr10:3690364-3917303	Plekhg1	protein_coding	MGI:2676551	-0.304689	0.106531	-2.86009	0.00423526	0.185422
ENSMUSG00000031990	ENSMUSG00000031990.16	chr9:27008680-27066717	Jam3	protein_coding	MGI:1933825	-0.181833	0.0636313	-2.85761	0.00426847	0.186292
ENSMUSG00000108348	ENSMUSG00000108348.3	chr7:16717011-16722077	Pnma8c	protein_coding	MGI:5625257	0.146978	0.051475	2.85532	0.00429935	0.187055
ENSMUSG00000051401	ENSMUSG00000051401.8	chr18:40390015-40664683	Kctd16	protein_coding	MGI:1914659	0.253049	0.0888216	2.84896	0.00438624	0.190243
ENSMUSG00000029675	ENSMUSG00000029675.13	chr5:134731447-134776177	Eln	protein_coding	MGI:95317	0.36337	0.127618	2.84732	0.00440886	0.190333
ENSMUSG00000024187	ENSMUSG00000024187.16	chr17:26430796-26463216	Fam234a	protein_coding	MGI:2146854	-0.227013	0.0798088	-2.84447	0.00444859	0.191166
ENSMUSG00000060126	ENSMUSG00000060126.15	chr14:76082533-76085965	Tpt1	protein_coding	MGI:104890	-0.13469	0.0474237	-2.84014	0.00450936	0.193183
ENSMUSG00000074345	ENSMUSG00000074345.5	chr9:53930689-53975672	Tnfaip8l3	protein_coding	MGI:2685363	0.343838	0.121183	2.83735	0.00454903	0.194287
ENSMUSG00000001864	ENSMUSG00000001864.14	chr2:31840151-31863454	Aif1l	protein_coding	MGI:1919598	-0.243515	0.0858932	-2.83509	0.00458132	0.195069
ENSMUSG00000028042	ENSMUSG00000028042.16	chr3:89284951-89302083	Zbtb7b	protein_coding	MGI:102755	-0.235536	0.0831288	-2.83338	0.00460583	0.195517
ENSMUSG00000021559	ENSMUSG00000021559.15	chr13:60749761-60911005	Dapk1	protein_coding	MGI:1916885	0.160814	0.0568354	2.82947	0.00466249	0.197322
ENSMUSG00000053465	ENSMUSG00000053465.7	chr14:119375753-120107227	Hs6st3	protein_coding	MGI:1354960	0.311194	0.110121	2.82592	0.00471453	0.198922
ENSMUSG00000050910	ENSMUSG00000050910.6	chr11:115272742-115286958	Cdr2l	protein_coding	MGI:2684867	-0.191541	0.067902	-2.82085	0.00478968	0.201484
ENSMUSG00000110027	ENSMUSG00000110027.2	chr7:135870053-135920242	C030029H02Rik	lncRNA	MGI:1924633	-0.318866	0.113252	-2.81555	0.00486942	0.203612
ENSMUSG00000023951	ENSMUSG00000023951.19	chr17:46327919-46343295	Vegfa	protein_coding	MGI:103178	-0.207195	0.0736579	-2.81293	0.00490917	0.204113
ENSMUSG00000027971	ENSMUSG00000027971.17	chr3:125197725-125522548	Ndst4	protein_coding	MGI:1932545	0.357396	0.127082	2.81233	0.00491844	0.204113
ENSMUSG00000034317	ENSMUSG00000034317.15	chr3:68942621-68952088	Trim59	protein_coding	MGI:1914199	-0.244243	0.086861	-2.81188	0.00492525	0.204113
ENSMUSG00000047959	ENSMUSG00000047959.5	chr3:106943485-106945386	Kcna3	protein_coding	MGI:96660	0.383689	0.136571	2.80944	0.00496271	0.204654
ENSMUSG00000029602	ENSMUSG00000029602.12	chr5:120786877-120817662	Rasal1	protein_coding	MGI:1330842	0.232926	0.0829175	2.80913	0.00496761	0.204654
ENSMUSG00000064061	ENSMUSG00000064061.14	chr16:48744595-48814528	Dzip3	protein_coding	MGI:1917433	0.160948	0.0574231	2.80284	0.00506547	0.207684
ENSMUSG00000038602	ENSMUSG00000038602.8	chr10:52566629-52987718	Slc35f1	protein_coding	MGI:2139810	0.15474	0.0552151	2.8025	0.00507089	0.207684
ENSMUSG00000096014	ENSMUSG00000096014.2	chr8:12445295-12450126	Sox1	protein_coding	MGI:98357	0.261039	0.0933576	2.79612	0.005172	0.211205
ENSMUSG00000030432	ENSMUSG00000030432.13	chr7:4795873-4798065	Rpl28	protein_coding	MGI:101839	-0.136175	0.0487879	-2.79117	0.00525185	0.213841
ENSMUSG00000033039	ENSMUSG00000033039.11	chr15:78993098-79021100	Micall1	protein_coding	MGI:105870	-0.147883	0.0530184	-2.78928	0.00528257	0.214466
ENSMUSG00000031983	ENSMUSG00000031983.8	chr8:125362495-125390108	2310022B05Rik	protein_coding	MGI:1916801	-0.181918	0.0652558	-2.78777	0.00530726	0.214699
ENSMUSG00000057457	ENSMUSG00000057457.12	chrX:155945071-156198308	Phex	protein_coding	MGI:107489	0.473352	0.16984	2.78705	0.00531905	0.214699
ENSMUSG00000041708	ENSMUSG00000041708.13	chr15:83663668-83742695	Mpped1	protein_coding	MGI:106316	0.169484	0.0608838	2.78373	0.00537385	0.215615
ENSMUSG00000037348	ENSMUSG00000037348.16	chr4:134224008-134237546	Paqr7	protein_coding	MGI:1919154	-0.152902	0.0549454	-2.78279	0.00538935	0.215615
ENSMUSG00000042707	ENSMUSG00000042707.7	chr4:124949131-124959496	Dnali1	protein_coding	MGI:1922813	0.533678	0.191856	2.78166	0.00540812	0.215615
ENSMUSG00000023886	ENSMUSG00000023886.11	chr17:14499768-14625052	Smoc2	protein_coding	MGI:1929881	0.609692	0.21927	2.78055	0.00542668	0.215615
ENSMUSG00000050541	ENSMUSG00000050541.15	chr11:43665433-43792037	Adra1b	protein_coding	MGI:104774	-0.342817	0.123339	-2.77947	0.00544477	0.215615
ENSMUSG00000000794	ENSMUSG00000000794.10	chr3:89427471-89582439	Kcnn3	protein_coding	MGI:2153183	0.268164	0.0964828	2.77939	0.00544604	0.215615
ENSMUSG00000043773	ENSMUSG00000043773.6	chr9:121766289-121776082	1700048O20Rik	lncRNA	MGI:1920637	0.337783	0.121541	2.77917	0.00544982	0.215615
ENSMUSG00000027956	ENSMUSG00000027956.12	chr3:79719871-79760080	Tmem144	protein_coding	MGI:1917902	-0.267487	0.0963246	-2.77693	0.00548742	0.215848
ENSMUSG00000025986	ENSMUSG00000025986.7	chr1:46846704-46932012	Slc39a10	protein_coding	MGI:1914515	0.155612	0.0560403	2.77679	0.00548982	0.215848
ENSMUSG00000029245	ENSMUSG00000029245.17	chr5:84202620-84565241	Epha5	protein_coding	MGI:99654	0.177677	0.0640032	2.77607	0.00550207	0.215848
ENSMUSG00000034818	ENSMUSG00000034818.18	chr10:81295061-81318543	Celf5	protein_coding	MGI:2442333	0.124971	0.0451429	2.76834	0.00563431	0.220212
ENSMUSG00000000552	ENSMUSG00000000552.11	chr15:103222322-103248520	Zfp385a	protein_coding	MGI:1352495	-0.149683	0.0540816	-2.76773	0.00564484	0.220212
ENSMUSG00000092274	ENSMUSG00000092274.4	chr19:5874736-5895506	Neat1	lncRNA	MGI:1914211	-0.249755	0.090322	-2.76516	0.00568952	0.221337
ENSMUSG00000040570	ENSMUSG00000040570.15	chr5:8540334-8672952	Rundc3b	protein_coding	MGI:2685286	0.159207	0.0576058	2.76373	0.00571441	0.221687
ENSMUSG00000104346	ENSMUSG00000104346.2	chr18:37807360-37974926	Pcdhga3	protein_coding	MGI:1935215	0.241089	0.0872733	2.76246	0.0057367	0.221935
ENSMUSG00000032733	ENSMUSG00000032733.7	chr9:56824477-56835655	Snx33	protein_coding	MGI:2443239	-0.223129	0.0808922	-2.75835	0.00580943	0.223511
ENSMUSG00000040183	ENSMUSG00000040183.14	chr4:32804035-32950841	Ankrd6	protein_coding	MGI:2154278	0.163418	0.0592738	2.75701	0.00583335	0.223815
ENSMUSG00000048385	ENSMUSG00000048385.10	chr15:76400403-76406699	Scrt1	protein_coding	MGI:2176606	-0.198241	0.0719989	-2.75339	0.00589808	0.225678
ENSMUSG00000063364	ENSMUSG00000063364.11	chr2:150152855-150204685	3300002I08Rik	protein_coding	MGI:1916527	0.604114	0.219525	2.75191	0.00592484
ENSMUSG00000053395	ENSMUSG00000053395.16	chr7:3439199-3464164	Cacng8	protein_coding	MGI:1932376	0.137224	0.0500273	2.74298	0.0060885	0.23104
ENSMUSG00000057134	ENSMUSG00000057134.7	chr10:67380341-67384898	Ado	protein_coding	MGI:2685083	-0.144747	0.0527864	-2.74212	0.00610439	0.23104
ENSMUSG00000063445	ENSMUSG00000063445.15	chr16:4527923-4537220	Nmral1	protein_coding	MGI:1915074	-0.233726	0.0852941	-2.74024	0.00613951	0.231742
ENSMUSG00000051890	ENSMUSG00000051890.14	chr12:69287950-69331406	Klhdc1	protein_coding	MGI:2672853	0.22158	0.0809226	2.73817	0.00617824	0.232575
ENSMUSG00000006390	ENSMUSG00000006390.16	chr4:118285290-118290150	Elovl1	protein_coding	MGI:1858959	-0.193984	0.0708816	-2.73673	0.00620527	0.232964
ENSMUSG00000041801	ENSMUSG00000041801.6	chr1:135693857-135696874	Phlda3	protein_coding	MGI:1351485	-0.196702	0.0719428	-2.73415	0.0062542	0.234172
ENSMUSG00000019894	ENSMUSG00000019894.15	chr10:103203644-103255238	Slc6a15	protein_coding	MGI:2143484	0.168503	0.0617995	2.72661	0.00639882	0.237738
ENSMUSG00000024812	ENSMUSG00000024812.12	chr19:24071869-24202394	Tjp2	protein_coding	MGI:1341872	-0.160451	0.0588481	-2.72652	0.00640052	0.237738
ENSMUSG00000062785	ENSMUSG00000062785.15	chr7:44240088-44254178	Kcnc3	protein_coding	MGI:96669	-0.212491	0.0780713	-2.72175	0.00649364	0.240558
ENSMUSG00000022044	ENSMUSG00000022044.15	chr14:66581745-66599129	Stmn4	protein_coding	MGI:1931224	-0.155642	0.0572361	-2.71929	0.00654215	0.241713
ENSMUSG00000036278	ENSMUSG00000036278.8	chr19:7034178-7175422	Macrod1	protein_coding	MGI:2147583	-0.258864	0.0952311	-2.71827	0.00656242	0.241823
ENSMUSG00000074170	ENSMUSG00000074170.6	chr7:37916396-37927440	Plekhf1	protein_coding	MGI:1919537	-0.360027	0.132642	-2.71428	0.00664208	0.243684
ENSMUSG00000074794	ENSMUSG00000074794.11	chr13:81031503-81044161	Arrdc3	protein_coding	MGI:2145242	-0.153118	0.0564182	-2.71399	0.00664784	0.243684
ENSMUSG00000020821	ENSMUSG00000020821.18	chr11:70591374-70622790	Kif1c	protein_coding	MGI:1098260	-0.131298	0.048456	-2.70962	0.00673598	0.245948
ENSMUSG00000038587	ENSMUSG00000038587.11	chr10:4216380-4309470	Akap12	protein_coding	MGI:1932576	-0.19666	0.0726012	-2.70876	0.00675342	0.245948
ENSMUSG00000048349	ENSMUSG00000048349.10	chr14:104699112-104705435	Pou4f1	protein_coding	MGI:102525	-0.723327	0.267076	-2.70832	0.00676243	0.245948
ENSMUSG00000028524	ENSMUSG00000028524.22	chr4:102598494-102830825	Sgip1	protein_coding	MGI:1920344	0.133591	0.0493479	2.70713	0.00678673	0.246191
ENSMUSG00000030739	ENSMUSG00000030739.19	chr7:44255227-44320267	Myh14	protein_coding	MGI:1919210	-0.162471	0.0601031	-2.70321	0.00686741	0.248472
ENSMUSG00000017417	ENSMUSG00000017417.15	chr11:97814064-97877270	Plxdc1	protein_coding	MGI:1919574	-0.190552	0.0705728	-2.70007	0.00693242	0.250176
ENSMUSG00000049001	ENSMUSG00000049001.6	chr6:65648574-65689310	Ndnf	protein_coding	MGI:1915419	0.275834	0.102269	2.69715	0.0069936	0.251734
ENSMUSG00000024640	ENSMUSG00000024640.10	chr19:15882042-15924701	Psat1	protein_coding	MGI:2183441	-0.135123	0.0501228	-2.69583	0.00702132	0.252082
ENSMUSG00000064373	ENSMUSG00000064373.14	chr15:3298029-3309990	Selenop	protein_coding	MGI:894288	-0.140041	0.0520138	-2.69238	0.0070945	0.253383
ENSMUSG00000053825	ENSMUSG00000053825.16	chr10:106306200-106771813	Ppfia2	protein_coding	MGI:2443834	0.179601	0.0667236	2.69172	0.00710842	0.253383
ENSMUSG00000032356	ENSMUSG00000032356.13	chr9:89791961-89909030	Rasgrf1	protein_coding	MGI:99694	0.160015	0.0594696	2.6907	0.00713013	0.253383
ENSMUSG00000027189	ENSMUSG00000027189.17	chr2:102130464-102238173	Trim44	protein_coding	MGI:1931835	0.12264	0.0455978	2.68961	0.00715363	0.253573
ENSMUSG00000052155	ENSMUSG00000052155.6	chr2:48704121-48793281	Acvr2a	protein_coding	MGI:102806	0.207354	0.0771794	2.68665	0.00721728	0.255181
ENSMUSG00000038264	ENSMUSG00000038264.9	chr9:57847395-57870148	Sema7a	protein_coding	MGI:1306826	-0.185585	0.069163	-2.6833	0.00729001	0.25581
ENSMUSG00000091712	ENSMUSG00000091712.3	chr16:4964973-5005135	Sec14l5	protein_coding	MGI:3616084	-0.209003	0.0780785	-2.67683	0.00743215	0.260144
ENSMUSG00000055148	ENSMUSG00000055148.8	chr8:73072877-73075500	Klf2	protein_coding	MGI:1342772	-0.319952	0.119649	-2.67408	0.00749336	0.261489
ENSMUSG00000026737	ENSMUSG00000026737.13	chr2:18847066-19002937	Pip4k2a	protein_coding	MGI:1298206	-0.140249	0.0524605	-2.67343	0.00750803	0.261489
ENSMUSG00000000948	ENSMUSG00000000948.17	chr7:59623897-59654812	Gm38393	protein_coding	MGI:5613898	0.254948	0.0954775	2.67024	0.00757966	0.263327
ENSMUSG00000025170	ENSMUSG00000025170.14	chr11:121246951-121279077	Rab40b	protein_coding	MGI:2183451	0.150044	0.0562312	2.66834	0.00762278	0.264168
ENSMUSG00000025203	ENSMUSG00000025203.7	chr19:44282113-44295303	Scd2	protein_coding	MGI:98240	-0.122988	0.0461114	-2.66719	0.00764877	0.264413
ENSMUSG00000001119	ENSMUSG00000001119.8	chr10:76544626-76562002	Col6a1	protein_coding	MGI:88459	0.238812	0.0896177	2.66478	0.00770387	0.265627
ENSMUSG00000052151	ENSMUSG00000052151.13	chr10:79362264-79369630	Plpp2	protein_coding	MGI:1354945	-0.338949	0.127274	-2.66314	0.00774152	0.265627
ENSMUSG00000026547	ENSMUSG00000026547.16	chr1:172327614-172334947	Tagln2	protein_coding	MGI:1312985	-0.225439	0.0846901	-2.66193	0.00776941	0.265627
ENSMUSG00000018486	ENSMUSG00000018486.3	chr11:103618190-103640647	Wnt9b	protein_coding	MGI:1197020	-1.92631	0.723793	-2.66141	0.00778142
ENSMUSG00000056629	ENSMUSG00000056629.17	chr19:6955109-6957869	Fkbp2	protein_coding	MGI:95542	-0.141297	0.0530939	-2.66127	0.00778473	0.265627
ENSMUSG00000117286	ENSMUSG00000117286.2	chr5:37242714-37386891	Gm1043	protein_coding	MGI:2685889	0.254225	0.0955437	2.66083	0.00779491	0.265627
ENSMUSG00000090213	ENSMUSG00000090213.2	chr2:167484528-167531742	Peds1	protein_coding	MGI:2142624	-0.163974	0.0616283	-2.66069	0.00779801	0.265627
ENSMUSG00000024381	ENSMUSG00000024381.17	chr18:32510283-32568790	Bin1	protein_coding	MGI:108092	-0.119299	0.0448733	-2.65857	0.0078473	0.266655
ENSMUSG00000117011	ENSMUSG00000117011.2	chr17:43456932-43469182	E130008D07Rik	lncRNA	MGI:3584523	0.237831	0.0894971	2.65742	0.00787417	0.266919
ENSMUSG00000072844	ENSMUSG00000072844.7	chrX:168758039-168761913	G530011O06Rik	lncRNA	MGI:3603513	-0.790049	0.297586	-2.65486	0.00793421
ENSMUSG00000014164	ENSMUSG00000014164.16	chr13:58148042-58261406	Klhl3	protein_coding	MGI:2445185	0.184907	0.0696724	2.65395	0.00795555	0.268815
ENSMUSG00000041141	ENSMUSG00000041141.8	chr7:16693604-16698532	Pnma8a	protein_coding	MGI:1918941	0.150604	0.0567722	2.65278	0.00798329	0.268815
ENSMUSG00000022514	ENSMUSG00000022514.15	chr16:26400454-26548867	Il1rap	protein_coding	MGI:104975	-0.165103	0.062259	-2.65188	0.00800443	0.268815
ENSMUSG00000028176	ENSMUSG00000028176.14	chr3:157788528-158267858	Lrrc7	protein_coding	MGI:2676665	0.219342	0.0827153	2.65177	0.00800709	0.268815
ENSMUSG00000032666	ENSMUSG00000032666.17	chr1:151728154-151965876	1700025G04Rik	protein_coding	MGI:1916649	0.159306	0.0601517	2.64841	0.0080871	0.270202
ENSMUSG00000081225	ENSMUSG00000081225.4	chr4:95987555-96029389	Cyp2j12	protein_coding	MGI:3717097	-0.341734	0.129179	-2.64543	0.00815877	0.271946
ENSMUSG00000016763	ENSMUSG00000016763.16	chr15:83489200-83609222	Scube1	protein_coding	MGI:1890616	0.275442	0.104336	2.63995	0.00829182	0.274759
ENSMUSG00000096188	ENSMUSG00000096188.2	chr8:105074823-105122439	Cmtm4	protein_coding	MGI:2142888	0.153065	0.0580045	2.63885	0.00831878	0.274759
ENSMUSG00000040938	ENSMUSG00000040938.17	chr11:70103578-70107243	Slc16a11	protein_coding	MGI:2663709	0.295238	0.111992	2.63625	0.0083827	0.276115
ENSMUSG00000019146	ENSMUSG00000019146.3	chr15:77875948-78004228	Cacng2	protein_coding	MGI:1316660	-0.148922	0.0565637	-2.63282	0.00846781	0.277609
ENSMUSG00000038344	ENSMUSG00000038344.15	chrX:161561915-161612450	Txlng	protein_coding	MGI:3590652	0.198608	0.0754796	2.63128	0.00850644	0.278222
ENSMUSG00000047804	ENSMUSG00000047804.16	chr11:61762133-61821078	Akap10	protein_coding	MGI:1890218	0.183309	0.0696959	2.63013	0.00853522	0.278512
ENSMUSG00000003528	ENSMUSG00000003528.16	chr16:17743087-17746083	Slc25a1	protein_coding	MGI:1345283	-0.155151	0.0591637	-2.62241	0.00873115	0.284106
ENSMUSG00000028226	ENSMUSG00000028226.16	chr4:17852893-18119145	Mmp16	protein_coding	MGI:1276107	0.202159	0.0771268	2.62112	0.00876408	0.284106
ENSMUSG00000049804	ENSMUSG00000049804.10	chrX:133587268-133597506	Armcx4	protein_coding	MGI:2147887	0.180006	0.0686995	2.62019	0.00878805	0.284106
ENSMUSG00000056665	ENSMUSG00000056665.3	chr15:74593053-74596488	Them6	protein_coding	MGI:1925301	-0.17032	0.0651234	-2.61534	0.00891385	0.287508
ENSMUSG00000062078	ENSMUSG00000062078.16	chr17:10421530-10538783	Qk	protein_coding	MGI:97837	-0.138337	0.0529232	-2.61392	0.00895109	0.287694
ENSMUSG00000038702	ENSMUSG00000038702.7	chr1:111786432-111792648	Dsel	protein_coding	MGI:2442948	0.186038	0.0711828	2.61353	0.00896118	0.287694
ENSMUSG00000033032	ENSMUSG00000033032.16	chr18:61863332-61919773	Afap1l1	protein_coding	MGI:2147199	-0.191361	0.073241	-2.61276	0.00898142	0.287694
ENSMUSG00000073910	ENSMUSG00000073910.11	chr4:34949074-35157484	Mob3b	protein_coding	MGI:2664539	-0.246258	0.094282	-2.61192	0.00900341	0.287738
ENSMUSG00000024413	ENSMUSG00000024413.15	chr18:12322749-12369457	Npc1	protein_coding	MGI:1097712	-0.175942	0.0673836	-2.61105	0.00902637	0.287814
ENSMUSG00000056947	ENSMUSG00000056947.6	chr3:55689931-55692422	Mab21l1	protein_coding	MGI:1333773	-0.912676	0.350021	-2.60749	0.00912094
ENSMUSG00000026678	ENSMUSG00000026678.11	chr1:169483070-169523382	Rgs5	protein_coding	MGI:1098434	-0.164511	0.063184	-2.60368	0.00922279	0.293406
ENSMUSG00000021242	ENSMUSG00000021242.10	chr12:84801336-84819926	Npc2	protein_coding	MGI:1915213	-0.143473	0.0551356	-2.60219	0.00926319	0.294022
ENSMUSG00000039410	ENSMUSG00000039410.17	chr4:154400582-154721330	Prdm16	protein_coding	MGI:1917923	0.247128	0.0950224	2.60073	0.00930245	0.294407
ENSMUSG00000074575	ENSMUSG00000074575.5	chr2:168102037-168123656	Kcng1	protein_coding	MGI:3616086	0.191228	0.0736178	2.59757	0.00938859	0.295427
ENSMUSG00000026203	ENSMUSG00000026203.17	chr1:75213050-75222336	Dnajb2	protein_coding	MGI:1928739	-0.141376	0.0544614	-2.59589	0.0094347	0.295427
ENSMUSG00000037960	ENSMUSG00000037960.12	chr13:49356426-49369513	Card19	protein_coding	MGI:1915730	-0.30095	0.115957	-2.59537	0.009449	0.295427
ENSMUSG00000029420	ENSMUSG00000029420.15	chr5:128834855-129030550	Rimbp2	protein_coding	MGI:2443235	0.149084	0.057454	2.59485	0.00946327	0.295427
ENSMUSG00000035441	ENSMUSG00000035441.15	chr11:80372952-80670851	Myo1d	protein_coding	MGI:107728	-0.180236	0.0694627	-2.59471	0.00946698	0.295427
ENSMUSG00000097268	ENSMUSG00000097268.2	chr1:37904380-37910469	Gm26805	lncRNA	MGI:5477299	0.412534	0.159012	2.59436	0.00947668	0.295427
ENSMUSG00000034327	ENSMUSG00000034327.18	chr14:67953386-67979759	Kctd9	protein_coding	MGI:2145579	-0.231535	0.0892724	-2.59358	0.00949827	0.295441
ENSMUSG00000038668	ENSMUSG00000038668.15	chr4:58435255-58553898	Lpar1	protein_coding	MGI:108429	-0.177227	0.0683577	-2.59265	0.00952396	0.295581
ENSMUSG00000038007	ENSMUSG00000038007.15	chr4:86792633-86853059	Acer2	protein_coding	MGI:1920932	-0.254885	0.0983615	-2.59131	0.00956106	0.295848
ENSMUSG00000015053	ENSMUSG00000015053.15	chr6:88170873-88184014	Gata2	protein_coding	MGI:95662	-0.313894	0.121156	-2.59081	0.00957492	0.295848
ENSMUSG00000056215	ENSMUSG00000056215.15	chr6:34006379-34110969	Lrguk	protein_coding	MGI:1921604	0.430411	0.16636	2.58723	0.00967513	0.298284
ENSMUSG00000034636	ENSMUSG00000034636.10	chr4:108086921-108158293	Zyg11b	protein_coding	MGI:2685277	0.138969	0.0537445	2.58573	0.00971735	0.298695
ENSMUSG00000055078	ENSMUSG00000055078.8	chr7:57057420-57159807	Gabra5	protein_coding	MGI:95617	0.177914	0.0688318	2.58477	0.00974447	0.298695
ENSMUSG00000030630	ENSMUSG00000030630.17	chr7:84234367-84255930	Fah	protein_coding	MGI:95482	-0.205971	0.0796954	-2.58448	0.00975262	0.298695
ENSMUSG00000001300	ENSMUSG00000001300.17	chr8:8667434-8711242	Efnb2	protein_coding	MGI:105097	0.142551	0.0552588	2.57971	0.0098884	0.301398
ENSMUSG00000027985	ENSMUSG00000027985.15	chr3:130904120-131018005	Lef1	protein_coding	MGI:96770	-0.33757	0.130858	-2.57967	0.00988936	0.301398
ENSMUSG00000039552	ENSMUSG00000039552.15	chr10:33781107-33792017	Rsph4a	protein_coding	MGI:3027894	0.467531	0.181282	2.57903	0.00990795	0.301398
ENSMUSG00000027978	ENSMUSG00000027978.10	chr3:123240562-123300246	Prss12	protein_coding	MGI:1100881	0.626209	0.242871	2.57836	0.00992717	0.301398
ENSMUSG00000053398	ENSMUSG00000053398.12	chr3:98220486-98247306	Phgdh	protein_coding	MGI:1355330	-0.143184	0.0555655	-2.57686	0.00997029	0.30205
ENSMUSG00000018593	ENSMUSG00000018593.14	chr11:55285326-55314009	Sparc	protein_coding	MGI:98373	-0.184077	0.0714656	-2.57574	0.0100025	0.302371
ENSMUSG00000066113	ENSMUSG00000066113.17	chr4:85432409-86346622	Adamtsl1	protein_coding	MGI:1924989	-0.251614	0.0977386	-2.57436	0.0100427	0.302929
ENSMUSG00000039195	ENSMUSG00000039195.5	chr2:32267109-32271950	Bbln	protein_coding	MGI:1920987	-0.167171	0.0649808	-2.57261	0.0100934	0.303802
ENSMUSG00000036835	ENSMUSG00000036835.8	chr7:30261288-30263052	Psenen	protein_coding	MGI:1913590	-0.163186	0.0634897	-2.57027	0.0101619	0.305207
ENSMUSG00000023827	ENSMUSG00000023827.9	chr17:12337591-12438532	Agpat4	protein_coding	MGI:1915512	-0.147756	0.057516	-2.56896	0.0102004	0.305705
ENSMUSG00000027035	ENSMUSG00000027035.11	chr2:68691785-68944626	Cers6	protein_coding	MGI:2442564	0.149273	0.0581977	2.56494	0.0103195	0.307776
ENSMUSG00000085881	ENSMUSG00000085881.3	chr13:74156128-74157473	Gm15912	lncRNA	MGI:3801895	-0.386358	0.150651	-2.56458	0.01033	0.307776
ENSMUSG00000041771	ENSMUSG00000041771.15	chr12:102094992-102233350	Slc24a4	protein_coding	MGI:2447362	0.230162	0.0897788	2.56366	0.0103576	0.307776
ENSMUSG00000039278	ENSMUSG00000039278.11	chrX:7786061-7790649	Pcsk1n	protein_coding	MGI:1353431	-0.123111	0.0481308	-2.55783	0.0105327	0.312314
ENSMUSG00000060675	ENSMUSG00000060675.14	chr19:7534824-7565910	Plaat3	protein_coding	MGI:2179715	-0.15199	0.0595433	-2.55259	0.0106925	0.315711
ENSMUSG00000058669	ENSMUSG00000058669.8	chr12:56658174-56660069	Nkx2-9	protein_coding	MGI:1270158	-0.795993	0.311842	-2.55255	0.0106938
ENSMUSG00000050627	ENSMUSG00000050627.14	chr9:114728409-114763055	Gpd1l	protein_coding	MGI:1289257	0.124188	0.0486995	2.5501	0.0107692	0.317306
ENSMUSG00000062257	ENSMUSG00000062257.14	chr9:27702071-28836706	Opcml	protein_coding	MGI:97397	0.159806	0.0627642	2.54614	0.0108921	0.319578
ENSMUSG00000033902	ENSMUSG00000033902.13	chr2:119803180-119857889	Mapkbp1	protein_coding	MGI:1347004	0.156645	0.0616654	2.54023	0.0110778	0.324346
ENSMUSG00000047496	ENSMUSG00000047496.7	chr1:105204639-105284435	Rnf152	protein_coding	MGI:2443787	-0.261407	0.102949	-2.53918	0.0111112	0.324643
ENSMUSG00000025927	ENSMUSG00000025927.14	chr1:19279138-19308800	Tfap2b	protein_coding	MGI:104672	1.25611	0.494761	2.53881	0.0111229
ENSMUSG00000040760	ENSMUSG00000040760.12	chr14:26640945-26693189	Appl1	protein_coding	MGI:1920243	0.132646	0.0522666	2.53788	0.0111526	0.324863
ENSMUSG00000029648	ENSMUSG00000029648.14	chr5:147498414-147662821	Flt1	protein_coding	MGI:95558	-0.140652	0.0554676	-2.53576	0.0112205	0.324863
ENSMUSG00000085167	ENSMUSG00000085167.2	chr11:24026559-24027367	Gm12063	lncRNA	MGI:3649572	0.84904	0.334898	2.53522	0.0112376
ENSMUSG00000008318	ENSMUSG00000008318.11	chr7:100495054-100512653	Relt	protein_coding	MGI:2443373	-0.226009	0.0891505	-2.53514	0.0112401	0.324863
ENSMUSG00000027669	ENSMUSG00000027669.15	chr3:32634481-32670734	Gnb4	protein_coding	MGI:104581	0.196168	0.0773892	2.53482	0.0112505	0.324863
ENSMUSG00000057280	ENSMUSG00000057280.16	chr4:58285960-58374303	Musk	protein_coding	MGI:103581	0.288985	0.11404	2.53406	0.0112748	0.324863
ENSMUSG00000043461	ENSMUSG00000043461.14	chr3:69726875-69767273	Sptssb	protein_coding	MGI:1913433	-0.498229	0.196685	-2.53313	0.0113048	0.324863
ENSMUSG00000037242	ENSMUSG00000037242.9	chr4:134941280-135000125	Clic4	protein_coding	MGI:1352754	-0.128326	0.0506873	-2.53172	0.0113503	0.32502
ENSMUSG00000036591	ENSMUSG00000036591.17	chr2:20852730-20973692	Arhgap21	protein_coding	MGI:1918685	0.143151	0.0565474	2.53152	0.0113569	0.32502
ENSMUSG00000025885	ENSMUSG00000025885.19	chr18:74574007-74904564	Myo5b	protein_coding	MGI:106598	0.181205	0.0716744	2.52818	0.0114657	0.326753
ENSMUSG00000004936	ENSMUSG00000004936.9	chr9:64093052-64160913	Map2k1	protein_coding	MGI:1346866	0.12616	0.049907	2.5279	0.0114746	0.326753
ENSMUSG00000060371	ENSMUSG00000060371.13	chr5:130398296-130876253	Caln1	protein_coding	MGI:2155987	0.163997	0.0648849	2.52751	0.0114876	0.326753
ENSMUSG00000035048	ENSMUSG00000035048.14	chr9:102503495-102511624	Anapc13	protein_coding	MGI:1916260	-0.181312	0.0718403	-2.52382	0.0116086	0.328731
ENSMUSG00000032252	ENSMUSG00000032252.15	chr9:61964530-62029937	Glce	protein_coding	MGI:2136405	0.146546	0.0580844	2.52298	0.0116365	0.328731
ENSMUSG00000025465	ENSMUSG00000025465.14	chr7:139685623-139696389	Echs1	protein_coding	MGI:2136460	-0.145365	0.0576474	-2.52162	0.0116816	0.328731
ENSMUSG00000090223	ENSMUSG00000090223.3	chr16:96268806-96326993	Pcp4	protein_coding	MGI:97509	-0.175236	0.0694957	-2.52154	0.0116843	0.328731
ENSMUSG00000027737	ENSMUSG00000027737.11	chr3:49846975-50398063	Slc7a11	protein_coding	MGI:1347355	0.175161	0.0694789	2.52107	0.0116997	0.328731
ENSMUSG00000022766	ENSMUSG00000022766.15	chr16:17149235-17161439	Serpind1	protein_coding	MGI:96051	-0.346166	0.137338	-2.52054	0.0117177	0.328731
ENSMUSG00000042567	ENSMUSG00000042567.21	chr14:7457704-7666348	Nek10	protein_coding	MGI:2685128	0.474895	0.188445	2.52008	0.0117329	0.328731
ENSMUSG00000022054	ENSMUSG00000022054.12	chr14:68320039-68362295	Nefm	protein_coding	MGI:97314	-0.329299	0.13069	-2.5197	0.0117454	0.328731
ENSMUSG00000033717	ENSMUSG00000033717.7	chr19:54032582-54037413	Adra2a	protein_coding	MGI:87934	0.273642	0.108673	2.51803	0.0118015	0.329639
ENSMUSG00000030000	ENSMUSG00000030000.11	chr6:86005663-86101391	Add2	protein_coding	MGI:87919	0.134347	0.0533764	2.51697	0.0118369	0.329968
ENSMUSG00000030270	ENSMUSG00000030270.12	chr6:113259268-113282588	Cpne9	protein_coding	MGI:2443052	-0.195591	0.077774	-2.51486	0.011908	0.33051
ENSMUSG00000026991	ENSMUSG00000026991.21	chr2:58991194-59185552	Pkp4	protein_coding	MGI:109281	-0.118462	0.047122	-2.51394	0.0119389	0.33051
ENSMUSG00000066829	ENSMUSG00000066829.8	chr9:22188044-22218944	Zfp810	protein_coding	MGI:2384563	0.214587	0.0854005	2.51271	0.0119806	0.33051
ENSMUSG00000037712	ENSMUSG00000037712.18	chr14:45696252-45767575	Fermt2	protein_coding	MGI:2385001	-0.128032	0.0509818	-2.51134	0.0120274	0.33051
ENSMUSG00000030237	ENSMUSG00000030237.15	chr6:141751166-141801925	Slco1a4	protein_coding	MGI:1351896	-0.15665	0.0623868	-2.51095	0.0120405	0.33051
ENSMUSG00000020836	ENSMUSG00000020836.16	chr11:77353237-77361310	Coro6	protein_coding	MGI:2183448	-0.226609	0.0902687	-2.51039	0.0120599	0.33051
ENSMUSG00000026721	ENSMUSG00000026721.17	chr1:160046744-160620781	Rabgap1l	protein_coding	MGI:1352507	0.141648	0.0564582	2.5089	0.0121108	0.33051
ENSMUSG00000039620	ENSMUSG00000039620.18	chr8:36924702-36983724	Trmt9b	protein_coding	MGI:2442328	0.198271	0.0790311	2.50877	0.0121152	0.33051
ENSMUSG00000042851	ENSMUSG00000042851.18	chr2:128809322-128860483	Zc3h6	protein_coding	MGI:1926001	0.182835	0.0728982	2.50809	0.0121385	0.33051
ENSMUSG00000041329	ENSMUSG00000041329.14	chr11:69490562-69496768	Atp1b2	protein_coding	MGI:88109	-0.134563	0.0536573	-2.50782	0.012148	0.33051
ENSMUSG00000026566	ENSMUSG00000026566.16	chr1:165419809-165462107	Mpzl1	protein_coding	MGI:1915731	-0.181062	0.0722125	-2.50735	0.012164	0.33051
ENSMUSG00000036006	ENSMUSG00000036006.21	chr13:24685508-24917799	Ripor2	protein_coding	MGI:2444879	0.210993	0.0841773	2.50653	0.0121922	0.330634
ENSMUSG00000052848	ENSMUSG00000052848.8	chr5:111729288-111752798	C130026L21Rik	lncRNA	MGI:3041189	0.390558	0.155863	2.50577	0.0122185	0.330705
ENSMUSG00000020607	ENSMUSG00000020607.8	chr12:14196831-14202055	Lratd1	protein_coding	MGI:2145011	0.139648	0.0558252	2.50152	0.0123662	0.332752
ENSMUSG00000081534	ENSMUSG00000081534.4	chr15:97676401-97690573	Slc48a1	protein_coding	MGI:1914989	-0.121529	0.0485955	-2.50083	0.0123902	0.332752
ENSMUSG00000038020	ENSMUSG00000038020.6	chr11:98727611-98744523	Rapgefl1	protein_coding	MGI:3611446	0.15384	0.0615206	2.50062	0.0123976	0.332752
ENSMUSG00000056771	ENSMUSG00000056771.8	chr6:128164781-128177586	Gm10010	lncRNA	MGI:3641978	0.291806	0.116698	2.50052	0.0124011	0.332752
ENSMUSG00000040616	ENSMUSG00000040616.4	chr4:141758303-141811615	Tmem51	protein_coding	MGI:2384874	-0.299822	0.119936	-2.49985	0.0124246	0.332752
ENSMUSG00000017631	ENSMUSG00000017631.20	chr11:76307560-76514384	Abr	protein_coding	MGI:107771	0.135503	0.0542123	2.49949	0.0124371	0.332752
ENSMUSG00000028158	ENSMUSG00000028158.15	chr3:137795615-137850729	Mttp	protein_coding	MGI:106926	0.229772	0.0920309	2.49668	0.0125361	0.33476
ENSMUSG00000026514	ENSMUSG00000026514.15	chr1:181180193-181288206	Cnih3	protein_coding	MGI:1920228	0.2428	0.0973146	2.49501	0.0125955	0.335602
ENSMUSG00000045294	ENSMUSG00000045294.12	chr5:28276361-28283660	Insig1	protein_coding	MGI:1916289	-0.185111	0.0742223	-2.49401	0.0126308	0.335602
ENSMUSG00000068151	ENSMUSG00000068151.8	chr7:60777744-60961469	A230006K03Rik	lncRNA	MGI:3644205	0.408474	0.163828	2.49331	0.0126557	0.335602
ENSMUSG00000036751	ENSMUSG00000036751.8	chr7:30316286-30325576	Cox6b1	protein_coding	MGI:107460	-0.13107	0.0525732	-2.49309	0.0126638	0.335602
ENSMUSG00000070498	ENSMUSG00000070498.4	chr5:125608838-125869647	Tmem132b	protein_coding	MGI:3609245	0.124585	0.0500267	2.49037	0.0127608	0.336896
ENSMUSG00000026469	ENSMUSG00000026469.15	chr1:155151447-155293161	Xpr1	protein_coding	MGI:97932	0.138619	0.0556891	2.48916	0.0128045	0.337412
ENSMUSG00000006517	ENSMUSG00000006517.6	chr8:123160340-123170161	Mvd	protein_coding	MGI:2179327	-0.2244	0.0902062	-2.48763	0.0128597	0.337582
ENSMUSG00000027797	ENSMUSG00000027797.16	chr3:55149785-55446489	Dclk1	protein_coding	MGI:1330861	0.138135	0.0555433	2.48697	0.0128835	0.337582
ENSMUSG00000024725	ENSMUSG00000024725.14	chr19:18493501-18609187	Ostf1	protein_coding	MGI:700012	-0.21794	0.0877541	-2.48353	0.0130088	0.33959
ENSMUSG00000038537	ENSMUSG00000038537.2	chr2:172090412-172093034	Mc3r	protein_coding	MGI:96929	0.629892	0.25372	2.48262	0.0130419
ENSMUSG00000056708	ENSMUSG00000056708.6	chr1:154972107-154975382	Ier5	protein_coding	MGI:1337072	-0.151257	0.0609577	-2.48135	0.0130887	0.341038
ENSMUSG00000048387	ENSMUSG00000048387.9	chr12:9620116-9631500	Osr1	protein_coding	MGI:1344424	0.860013	0.34717	2.47721	0.0132413
ENSMUSG00000024194	ENSMUSG00000024194.17	chr17:27152793-27158543	Cuta	protein_coding	MGI:1914925	-0.163315	0.0659406	-2.47669	0.0132605	0.343593
ENSMUSG00000043463	ENSMUSG00000043463.7	chrX:135758896-135769504	Rab9b	protein_coding	MGI:2442454	0.196125	0.0792529	2.47467	0.0133358	0.344903
ENSMUSG00000031447	ENSMUSG00000031447.8	chr8:13209161-13225338	Lamp1	protein_coding	MGI:96745	-0.114855	0.0464848	-2.4708	0.0134813	0.348022
ENSMUSG00000030357	ENSMUSG00000030357.11	chr6:128406698-128415640	Fkbp4	protein_coding	MGI:95543	-0.140391	0.0568449	-2.46972	0.0135219	0.348426
ENSMUSG00000071655	ENSMUSG00000071655.13	chr19:8848860-8853227	Ubxn1	protein_coding	MGI:1289301	-0.130306	0.0528372	-2.46618	0.0136563	0.35124
ENSMUSG00000103804	ENSMUSG00000103804.2	chr1:38115376-38116386	Gm37062	lncRNA	MGI:5610290	1.40628	0.570376	2.46554	0.0136808
ENSMUSG00000006411	ENSMUSG00000006411.13	chr1:171197667-171216166	Nectin4	protein_coding	MGI:1918990	-0.358561	0.145467	-2.46489	0.0137055	0.351595
ENSMUSG00000039682	ENSMUSG00000039682.13	chr5:45650716-45670033	Lap3	protein_coding	MGI:1914238	-0.14294	0.0580047	-2.46429	0.0137286	0.351595
ENSMUSG00000026393	ENSMUSG00000026393.11	chr1:138410613-138547879	Nek7	protein_coding	MGI:1890645	-0.130678	0.0530381	-2.46384	0.0137456	0.351595
ENSMUSG00000021647	ENSMUSG00000021647.8	chr13:100034997-100037599	Cartpt	protein_coding	MGI:1351330	0.824423	0.335057	2.46055	0.0138725	0.353939
ENSMUSG00000028033	ENSMUSG00000028033.17	chr1:21468627-22032166	Kcnq5	protein_coding	MGI:1924937	0.148125	0.0602099	2.46015	0.0138879	0.353939
ENSMUSG00000026220	ENSMUSG00000026220.7	chr1:84883619-84912855	Slc16a14	protein_coding	MGI:1919031	0.347434	0.141425	2.45666	0.0140235	0.356213
ENSMUSG00000032492	ENSMUSG00000032492.15	chr9:110551153-110576213	Pth1r	protein_coding	MGI:97801	-0.296449	0.120741	-2.45524	0.0140792	0.356213
ENSMUSG00000025777	ENSMUSG00000025777.9	chr1:17215586-17234495	Gdap1	protein_coding	MGI:1338002	0.128859	0.0525081	2.45407	0.014125	0.356611
ENSMUSG00000040659	ENSMUSG00000040659.4	chr4:141585453-141602231	Efhd2	protein_coding	MGI:106504	-0.137356	0.0559992	-2.45282	0.0141743	0.356611
ENSMUSG00000049872	ENSMUSG00000049872.9	chr10:33963811-33972515	Calhm5	protein_coding	MGI:2143897	0.292344	0.119211	2.45232	0.0141937	0.356611
ENSMUSG00000054793	ENSMUSG00000054793.9	chr7:24181448-24203964	Cadm4	protein_coding	MGI:2449088	-0.111322	0.0453962	-2.45224	0.014197	0.356611
ENSMUSG00000074643	ENSMUSG00000074643.13	chr2:155913762-155953885	Cpne1	protein_coding	MGI:2386621	0.162881	0.0664701	2.45044	0.014268	0.357751
ENSMUSG00000071604	ENSMUSG00000071604.6	chr19:23950114-24008383	Fam189a2	protein_coding	MGI:2685813	-0.211043	0.0861502	-2.44972	0.0142969	0.357832
ENSMUSG00000041891	ENSMUSG00000041891.17	chr18:66113809-66155651	Lman1	protein_coding	MGI:1917611	0.141012	0.0575823	2.44888	0.0143301	0.358021
ENSMUSG00000020354	ENSMUSG00000020354.16	chr11:46787080-47879796	Sgcd	protein_coding	MGI:1346525	0.596276	0.243509	2.44868	0.0143379
ENSMUSG00000026932	ENSMUSG00000026932.15	chr2:25945547-26013232	Nacc2	protein_coding	MGI:1915241	-0.12782	0.0522786	-2.44497	0.0144864	0.361281
ENSMUSG00000018822	ENSMUSG00000018822.8	chr19:42186410-42190691	Sfrp5	protein_coding	MGI:1860298	-0.453305	0.185458	-2.44424	0.0145156	0.361365
ENSMUSG00000041836	ENSMUSG00000041836.11	chr7:135139210-135288022	Ptpre	protein_coding	MGI:97813	0.15595	0.0638396	2.44284	0.0145722	0.362127
ENSMUSG00000037706	ENSMUSG00000037706.18	chr7:142606476-142621671	Cd81	protein_coding	MGI:1096398	-0.111934	0.0458685	-2.44031	0.0146745	0.363574
ENSMUSG00000026344	ENSMUSG00000026344.10	chr1:125795359-125840838	Lypd1	protein_coding	MGI:1919835	0.164727	0.0675078	2.44012	0.0146825	0.363574
ENSMUSG00000051041	ENSMUSG00000051041.9	chr7:107166653-107190301	Olfml1	protein_coding	MGI:2679264	-0.208903	0.0856747	-2.43833	0.0147554	0.364179
ENSMUSG00000068735	ENSMUSG00000068735.15	chr2:93017893-93032104	Trp53i11	protein_coding	MGI:2670995	0.186253	0.0763983	2.43792	0.0147719	0.364179
ENSMUSG00000004031	ENSMUSG00000004031.14	chr1:158072839-158183896	Brinp2	protein_coding	MGI:2443333	0.137801	0.0565435	2.43708	0.0148063	0.364179
ENSMUSG00000021541	ENSMUSG00000021541.15	chr13:56920926-57043806	Trpc7	protein_coding	MGI:1349470	0.30959	0.127073	2.43633	0.0148373	0.364179
ENSMUSG00000015970	ENSMUSG00000015970.20	chr14:29730980-29762484	Chdh	protein_coding	MGI:1860776	-0.302016	0.124183	-2.43203	0.0150144	0.367515
ENSMUSG00000102440	ENSMUSG00000102440.2	chr18:37869989-37974923	Pcdhga9	protein_coding	MGI:1935226	0.198458	0.0816109	2.43176	0.0150258	0.367515
ENSMUSG00000024063	ENSMUSG00000024063.14	chr17:73225300-73248942	Lbh	protein_coding	MGI:1925139	-0.138404	0.0569354	-2.4309	0.0150613	0.367738
ENSMUSG00000052581	ENSMUSG00000052581.14	chr6:79995860-80787124	Lrrtm4	protein_coding	MGI:2389180	0.195624	0.0805473	2.42869	0.0151534	0.367952
ENSMUSG00000028496	ENSMUSG00000028496.18	chr4:87688162-87951601	Mllt3	protein_coding	MGI:1917372	0.172336	0.0709603	2.42862	0.0151564	0.367952
ENSMUSG00000031242	ENSMUSG00000031242.8	chrX:106826357-106859940	2610002M06Rik	protein_coding	MGI:1914278	0.145815	0.0600435	2.42849	0.0151618	0.367952
ENSMUSG00000036737	ENSMUSG00000036737.13	chr9:119067498-119151493	Oxsr1	protein_coding	MGI:1917378	-0.135375	0.0557518	-2.42816	0.0151754	0.367952
ENSMUSG00000031155	ENSMUSG00000031155.18	chrX:7744501-7749671	Pim2	protein_coding	MGI:97587	0.15388	0.0634056	2.42692	0.0152277	0.368151
ENSMUSG00000040022	ENSMUSG00000040022.15	chr19:59891316-59932086	Rab11fip2	protein_coding	MGI:1922248	0.125211	0.0515972	2.42671	0.0152364	0.368151
ENSMUSG00000032902	ENSMUSG00000032902.2	chr3:104545984-104565778	Slc16a1	protein_coding	MGI:106013	-0.172642	0.0711774	-2.42551	0.0152867	0.368389
ENSMUSG00000005611	ENSMUSG00000005611.16	chr7:110467473-110581668	Irag1	protein_coding	MGI:1338023	-0.331861	0.136895	-2.4242	0.0153421	0.368389
ENSMUSG00000027610	ENSMUSG00000027610.18	chr2:155405101-155434730	Gss	protein_coding	MGI:95852	-0.186514	0.0769489	-2.42387	0.0153561	0.368389
ENSMUSG00000070427	ENSMUSG00000070427.5	chr7:101664092-101667897	Il18bp	protein_coding	MGI:1333800	0.37908	0.156413	2.42358	0.0153682	0.368389
ENSMUSG00000032349	ENSMUSG00000032349.14	chr9:77824646-77891801	Elovl5	protein_coding	MGI:1916051	-0.136238	0.0562246	-2.4231	0.0153886	0.368389
ENSMUSG00000037824	ENSMUSG00000037824.7	chr14:40628402-40688764	Tspan14	protein_coding	MGI:1196325	-0.159756	0.0659578	-2.42209	0.0154316	0.368406
ENSMUSG00000025503	ENSMUSG00000025503.6	chr7:140972112-140982881	Taldo1	protein_coding	MGI:1274789	-0.1325	0.0547715	-2.41914	0.0155571	0.37077
ENSMUSG00000019927	ENSMUSG00000019927.7	chr10:71090810-71121092	Ube2d1	protein_coding	MGI:2384911	-0.138395	0.0572573	-2.41708	0.0156457	0.371261
ENSMUSG00000055538	ENSMUSG00000055538.8	chr14:25712066-25769463	Zcchc24	protein_coding	MGI:1919168	-0.12739	0.052707	-2.41694	0.0156517	0.371261
ENSMUSG00000084898	ENSMUSG00000084898.2	chr4:36952966-36988032	Gm12371	lncRNA	MGI:3652322	0.542257	0.224381	2.41668	0.0156627	0.371261
ENSMUSG00000094732	ENSMUSG00000094732.3	chr19:20302220-20422247	1500015L24Rik	lncRNA	MGI:1916244	-0.488249	0.20204	-2.41659	0.0156665
ENSMUSG00000090019	ENSMUSG00000090019.6	chr6:48715988-48720729	Gimap1	protein_coding	MGI:109368	-0.448037	0.185432	-2.41618	0.0156841	0.371261
ENSMUSG00000002012	ENSMUSG00000002012.14	chrX:72699600-72703723	Pnck	protein_coding	MGI:1347357	0.202655	0.0839523	2.41393	0.0157813	0.37293
ENSMUSG00000029544	ENSMUSG00000029544.17	chr5:115306748-115332440	Cabp1	protein_coding	MGI:1352750	-0.169515	0.0702566	-2.41279	0.0158309	0.373003
ENSMUSG00000027834	ENSMUSG00000027834.16	chr3:75464854-75550802	Serpini1	protein_coding	MGI:1194506	0.165679	0.0686899	2.41199	0.0158659	0.373003
ENSMUSG00000027712	ENSMUSG00000027712.14	chr3:36503072-36530043	Anxa5	protein_coding	MGI:106008	-0.133102	0.0551899	-2.41171	0.0158779	0.373003
ENSMUSG00000106099	ENSMUSG00000106099.2	chr3:119536857-119540095	Gm42664	lncRNA	MGI:5662801	0.591493	0.245313	2.41118	0.0159011
ENSMUSG00000098128	ENSMUSG00000098128.2	chr12:81275058-81290032	Gm3693	lncRNA	MGI:3781869	0.485073	0.20119	2.41102	0.0159081	0.373003
ENSMUSG00000064354	ENSMUSG00000064354.1	chrM:7013-7696	mt-Co2	protein_coding	MGI:102503	-0.170619	0.070773	-2.41079	0.0159179	0.373003
ENSMUSG00000020570	ENSMUSG00000020570.16	chr12:33003890-33029859	Sypl	protein_coding	MGI:108081	-0.135071	0.0560781	-2.40863	0.0160126	0.373402
ENSMUSG00000003541	ENSMUSG00000003541.7	chr17:36132576-36133815	Ier3	protein_coding	MGI:104814	-0.27161	0.112784	-2.40823	0.01603	0.373402
ENSMUSG00000033849	ENSMUSG00000033849.4	chr1:143516402-143530352	B3galt2	protein_coding	MGI:1349461	0.187555	0.0778895	2.40796	0.0160419	0.373402
ENSMUSG00000025089	ENSMUSG00000025089.16	chr19:58224036-58444341	Gfra1	protein_coding	MGI:1100842	0.16114	0.066946	2.40702	0.0160832	0.373646
ENSMUSG00000036264	ENSMUSG00000036264.10	chr11:52655461-53079365	Fstl4	protein_coding	MGI:2443199	0.230958	0.0959905	2.40605	0.016126	0.373646
ENSMUSG00000037984	ENSMUSG00000037984.10	chr6:55654807-55658248	Neurod6	protein_coding	MGI:106593	0.243344	0.101145	2.4059	0.0161326	0.373646
ENSMUSG00000043557	ENSMUSG00000043557.17	chr17:30046923-30189061	Mdga1	protein_coding	MGI:1922012	0.209248	0.0870052	2.405	0.0161724	0.373947
ENSMUSG00000031626	ENSMUSG00000031626.19	chr8:45960825-46280943	Sorbs2	protein_coding	MGI:1924574	0.132644	0.0551701	2.40428	0.0162043	0.374036
ENSMUSG00000051234	ENSMUSG00000051234.7	chr9:96352990-96360728	Rnf7	protein_coding	MGI:1337096	-0.140757	0.0585654	-2.40342	0.0162426	0.374036
ENSMUSG00000034612	ENSMUSG00000034612.8	chr10:82821332-83031734	Chst11	protein_coding	MGI:1927166	0.145108	0.0603834	2.4031	0.0162566	0.374036
ENSMUSG00000073514	ENSMUSG00000073514.5	chr18:89310548-89787652	Dok6	protein_coding	MGI:3639495	0.148538	0.0618545	2.40141	0.0163321	0.37454
ENSMUSG00000046500	ENSMUSG00000046500.9	chr6:96808164-97037374	Tafa4	protein_coding	MGI:2444563	-0.708298	0.294967	-2.40128	0.0163376
ENSMUSG00000047446	ENSMUSG00000047446.19	chr12:40055446-40088024	Arl4a	protein_coding	MGI:99437	0.156428	0.0651717	2.40024	0.0163842	0.375117
ENSMUSG00000010529	ENSMUSG00000010529.7	chr12:111451043-111452257	Gm266	protein_coding	MGI:2685112	-0.406032	0.169219	-2.39945	0.0164198	0.375317
ENSMUSG00000025810	ENSMUSG00000025810.10	chr8:129085085-129229844	Nrp1	protein_coding	MGI:106206	0.227799	0.0949847	2.39827	0.0164726	0.375909
ENSMUSG00000042272	ENSMUSG00000042272.18	chr2:77010684-77110936	Sestd1	protein_coding	MGI:1916262	0.161156	0.0672246	2.39728	0.0165172	0.375948
ENSMUSG00000036699	ENSMUSG00000036699.13	chrX:35459557-35462811	Zcchc12	protein_coding	MGI:1919943	0.204535	0.0853283	2.39704	0.0165281	0.375948
ENSMUSG00000026305	ENSMUSG00000026305.16	chr1:90926459-91056666	Lrrfip1	protein_coding	MGI:1342770	0.167089	0.0697585	2.39524	0.0166093	0.376749
ENSMUSG00000087424	ENSMUSG00000087424.2	chrX:12908254-12911536	5730405O15Rik	lncRNA	MGI:1917739	0.616044	0.257255	2.39468	0.0166348
ENSMUSG00000044912	ENSMUSG00000044912.12	chr12:74044435-74320041	Syt16	protein_coding	MGI:2673872	0.137843	0.0575663	2.3945	0.016643	0.376749
ENSMUSG00000049420	ENSMUSG00000049420.10	chr10:25788229-25954950	Tmem200a	protein_coding	MGI:1924470	0.354845	0.148193	2.39447	0.0166443	0.376749
ENSMUSG00000028007	ENSMUSG00000028007.14	chr3:117575296-117662585	Snx7	protein_coding	MGI:1923811	0.204414	0.0854095	2.39334	0.0166959	0.377305
ENSMUSG00000038312	ENSMUSG00000038312.11	chr2:155543597-155571395	Edem2	protein_coding	MGI:1915540	-0.164545	0.0687718	-2.39263	0.0167283	0.377428
ENSMUSG00000033949	ENSMUSG00000033949.13	chr18:46298367-46345674	Trim36	protein_coding	MGI:106264	-0.233968	0.0978621	-2.39079	0.0168121	0.378706
ENSMUSG00000055320	ENSMUSG00000055320.19	chr7:112278525-112506014	Tead1	protein_coding	MGI:101876	0.178182	0.0745523	2.39003	0.0168469	0.378878
ENSMUSG00000001493	ENSMUSG00000001493.10	chr11:101768336-101785200	Meox1	protein_coding	MGI:103220	-0.660819	0.27649	-2.39003	0.0168471
ENSMUSG00000022388	ENSMUSG00000022388.15	chr15:88774836-88838621	Ttll8	protein_coding	MGI:1922902	0.751239	0.314837	2.38612	0.0170272
ENSMUSG00000041132	ENSMUSG00000041132.12	chr5:150495109-150520653	N4bp2l1	protein_coding	MGI:2140872	0.166585	0.0698243	2.38577	0.0170433	0.38268
ENSMUSG00000044067	ENSMUSG00000044067.8	chr12:31756866-31763946	Gpr22	protein_coding	MGI:1920260	0.193296	0.0810602	2.3846	0.0170978	0.382924
ENSMUSG00000095253	ENSMUSG00000095253.5	chr17:33034423-33049235	Zfp799	protein_coding	MGI:2443934	0.151559	0.0635641	2.38436	0.017109	0.382924
ENSMUSG00000054555	ENSMUSG00000054555.12	chr7:133484928-133833875	Adam12	protein_coding	MGI:105378	0.270532	0.113505	2.38344	0.0171519	0.383268
ENSMUSG00000037143	ENSMUSG00000037143.18	chr2:145776704-146056959	Cfap61	protein_coding	MGI:1926024	0.442185	0.185689	2.38132	0.0172505	0.384858
ENSMUSG00000027004	ENSMUSG00000027004.4	chr2:80242314-80277969	Frzb	protein_coding	MGI:892032	0.277611	0.116643	2.38	0.0173126	0.385175
ENSMUSG00000041895	ENSMUSG00000041895.16	chr11:109464157-109502793	Wipi1	protein_coding	MGI:1261864	-0.147984	0.0621822	-2.37985	0.0173199	0.385175
ENSMUSG00000070738	ENSMUSG00000070738.11	chr1:87781009-87872902	Dgkd	protein_coding	MGI:2138334	0.120847	0.0508063	2.37859	0.0173791	0.385293
ENSMUSG00000052301	ENSMUSG00000052301.15	chr7:126446588-126451877	Doc2a	protein_coding	MGI:109446	0.214297	0.0901239	2.3778	0.0174162	0.385293
ENSMUSG00000036499	ENSMUSG00000036499.10	chr10:95776512-95881380	Eea1	protein_coding	MGI:2442192	0.154971	0.0651795	2.37761	0.0174253	0.385293
ENSMUSG00000042292	ENSMUSG00000042292.19	chr15:80896482-81074958	Mrtfa	protein_coding	MGI:2384495	0.150802	0.0634395	2.3771	0.0174494	0.385293
ENSMUSG00000041346	ENSMUSG00000041346.12	chr11:69452584-69471081	Wrap53	protein_coding	MGI:2384933	-0.198265	0.0834166	-2.37681	0.0174632	0.385293
ENSMUSG00000051243	ENSMUSG00000051243.15	chr9:58103580-58111602	Islr2	protein_coding	MGI:2444277	0.183126	0.0770838	2.37567	0.017517	0.385872
ENSMUSG00000063297	ENSMUSG00000063297.8	chr7:54485246-54918633	Luzp2	protein_coding	MGI:1889615	0.13457	0.0566743	2.37445	0.0175751	0.386542
ENSMUSG00000042903	ENSMUSG00000042903.9	chrX:100298134-100304479	Foxo4	protein_coding	MGI:1891915	-0.163757	0.0690371	-2.37201	0.0176916	0.38828
ENSMUSG00000097814	ENSMUSG00000097814.6	chr1:96798851-96835521	Panct2	lncRNA	MGI:3643517	0.323284	0.136313	2.37163	0.0177098	0.38828
ENSMUSG00000027499	ENSMUSG00000027499.13	chr3:7431729-7510426	Pkia	protein_coding	MGI:104747	0.13108	0.0553029	2.37023	0.0177771	0.389146
ENSMUSG00000028108	ENSMUSG00000028108.17	chr3:95641459-95646881	Ecm1	protein_coding	MGI:103060	0.271232	0.114505	2.36873	0.0178493	0.389396
ENSMUSG00000024955	ENSMUSG00000024955.16	chr19:6888345-6899208	Esrra	protein_coding	MGI:1346831	-0.147715	0.0623616	-2.36868	0.0178515	0.389396
ENSMUSG00000046756	ENSMUSG00000046756.11	chr11:115494751-115498862	Mrps7	protein_coding	MGI:1354367	-0.148186	0.0625719	-2.36826	0.0178722	0.389396
ENSMUSG00000041889	ENSMUSG00000041889.8	chr1:135298795-135302975	Shisa4	protein_coding	MGI:1924802	-0.139722	0.0590305	-2.36695	0.0179353	0.390163
ENSMUSG00000001786	ENSMUSG00000001786.15	chr10:85857836-85887737	Fbxo7	protein_coding	MGI:1917004	-0.137645	0.058171	-2.36621	0.0179714	0.390341
ENSMUSG00000061518	ENSMUSG00000061518.12	chr1:36730530-36732762	Cox5b	protein_coding	MGI:88475	-0.112858	0.0477165	-2.36517	0.0180216	0.390822
ENSMUSG00000041362	ENSMUSG00000041362.18	chr19:58961788-59064532	Shtn1	protein_coding	MGI:1918903	-0.141056	0.0596579	-2.36441	0.0180588	0.391021
ENSMUSG00000036492	ENSMUSG00000036492.13	chr17:37253810-37258878	Rnf39	protein_coding	MGI:2156378	-0.53518	0.226492	-2.36291	0.0181321
ENSMUSG00000045231	ENSMUSG00000045231.6	chr16:23039406-23044234	BC106179	lncRNA	MGI:3702726	0.638636	0.270355	2.36221	0.0181662
ENSMUSG00000044452	ENSMUSG00000044452.11	chr7:35471768-35502428	Zfp507	protein_coding	MGI:1916378	0.195471	0.0827679	2.36168	0.0181924	0.392698
ENSMUSG00000044024	ENSMUSG00000044024.17	chr18:38088132-38092232	Rell2	protein_coding	MGI:1918044	-0.124381	0.0526797	-2.36107	0.0182221	0.392731
ENSMUSG00000025790	ENSMUSG00000025790.15	chr7:73925167-74204528	Slco3a1	protein_coding	MGI:1351867	-0.139916	0.0592758	-2.36043	0.018254	0.392812
ENSMUSG00000059187	ENSMUSG00000059187.13	chr6:96090135-96634159	Tafa1	protein_coding	MGI:2443695	0.391059	0.165904	2.35714	0.0184163	0.394749
ENSMUSG00000043670	ENSMUSG00000043670.5	chr10:80855423-80861496	Diras1	protein_coding	MGI:2183442	-0.117831	0.0500338	-2.35504	0.0185208	0.395507
ENSMUSG00000037341	ENSMUSG00000037341.15	chrX:19971993-20158046	Slc9a7	protein_coding	MGI:2444530	0.274031	0.116406	2.35409	0.018568	0.395811
ENSMUSG00000001552	ENSMUSG00000001552.15	chr11:100259784-100288589	Jup	protein_coding	MGI:96650	-0.138083	0.0586686	-2.35362	0.0185917	0.395811
ENSMUSG00000059493	ENSMUSG00000059493.14	chrX:160616292-160942726	Nhs	protein_coding	MGI:2684894	0.259622	0.110394	2.35179	0.0186834	0.396287
ENSMUSG00000004961	ENSMUSG00000004961.8	chr7:4542764-4550540	Syt5	protein_coding	MGI:1926368	0.138505	0.0588966	2.35166	0.0186897	0.396287
ENSMUSG00000055761	ENSMUSG00000055761.15	chr4:20118874-20778866	Nkain3	protein_coding	MGI:2444830	0.335591	0.142762	2.3507	0.018738	0.396287
ENSMUSG00000071648	ENSMUSG00000071648.5	chr19:8904755-8906720	Rom1	protein_coding	MGI:97998	-0.255961	0.108909	-2.35022	0.0187624	0.396287
ENSMUSG00000029636	ENSMUSG00000029636.12	chr5:146321795-146410425	Wasf3	protein_coding	MGI:2658986	0.110943	0.0472086	2.35006	0.0187704	0.396287
ENSMUSG00000022342	ENSMUSG00000022342.7	chr15:44969680-44978316	Kcnv1	protein_coding	MGI:1914748	0.136126	0.0579312	2.34978	0.0187843	0.396287
ENSMUSG00000042506	ENSMUSG00000042506.16	chr11:61042611-61065881	Usp22	protein_coding	MGI:2144157	0.109696	0.0467041	2.34874	0.0188372	0.396344
ENSMUSG00000048550	ENSMUSG00000048550.18	chr2:21210535-21219820	Thnsl1	protein_coding	MGI:2139347	0.168048	0.071552	2.34861	0.0188438	0.396344
ENSMUSG00000002997	ENSMUSG00000002997.16	chr12:32008475-32111295	Prkar2b	protein_coding	MGI:97760	0.12075	0.0514609	2.34644	0.0189539	0.398061
ENSMUSG00000001313	ENSMUSG00000001313.13	chr11:101355825-101362679	Rnd2	protein_coding	MGI:1338755	-0.136632	0.0582526	-2.3455	0.0190014	0.398343
ENSMUSG00000045813	ENSMUSG00000045813.8	chr7:61744254-61859227	Gm9801	lncRNA	MGI:3647139	0.543223	0.231625	2.34527	0.0190131
ENSMUSG00000023913	ENSMUSG00000023913.18	chr17:43878989-43923092	Pla2g7	protein_coding	MGI:1351327	-0.145021	0.0618413	-2.34505	0.0190244	0.398343
ENSMUSG00000041697	ENSMUSG00000041697.10	chr5:115483701-115487040	Cox6a1	protein_coding	MGI:103099	-0.114314	0.0487908	-2.34294	0.0191325	0.399775
ENSMUSG00000087403	ENSMUSG00000087403.10	chrX:151077824-151110491	Kantr	protein_coding	MGI:1920247	0.188558	0.0804908	2.3426	0.0191501	0.399775
ENSMUSG00000091636	ENSMUSG00000091636.3	chr17:69746321-69796228	Akain1	protein_coding	MGI:2444600	-0.31837	0.135964	-2.34158	0.0192024	0.399939
ENSMUSG00000068798	ENSMUSG00000068798.11	chr3:105634583-105708652	Rap1a	protein_coding	MGI:97852	-0.155878	0.0665766	-2.34133	0.0192152	0.399939
ENSMUSG00000109006	ENSMUSG00000109006.3	chr7:61179619-61265075	B230209E15Rik	lncRNA	MGI:2442668	0.1631	0.0697209	2.33933	0.0193182	0.40026
ENSMUSG00000074671	ENSMUSG00000074671.7	chr2:153064290-153067361	Tspyl3	protein_coding	MGI:2139328	0.145578	0.0622337	2.33921	0.0193244	0.40026
ENSMUSG00000053007	ENSMUSG00000053007.10	chr6:53264255-53677361	Creb5	protein_coding	MGI:2443973	-0.274803	0.117495	-2.33885	0.0193432	0.40026
ENSMUSG00000035021	ENSMUSG00000035021.14	chr12:54939774-55061133	Baz1a	protein_coding	MGI:1309478	-0.241802	0.103404	-2.33842	0.0193656	0.40026
ENSMUSG00000033565	ENSMUSG00000033565.19	chr15:76963190-77191204	Rbfox2	protein_coding	MGI:1933973	0.125092	0.0534993	2.33821	0.0193764	0.40026
ENSMUSG00000008763	ENSMUSG00000008763.17	chr3:100469524-100592819	Man1a2	protein_coding	MGI:104676	0.121408	0.0519348	2.33771	0.0194025	0.40026
ENSMUSG00000087143	ENSMUSG00000087143.10	chr13:78346136-78427510	A830082K12Rik	lncRNA	MGI:2443527	-0.2543	0.109021	-2.33259	0.0196696	0.405172
ENSMUSG00000026679	ENSMUSG00000026679.4	chr2:21185542-21210176	Enkur	protein_coding	MGI:1918483	0.431418	0.185028	2.33163	0.01972	0.40561
ENSMUSG00000030729	ENSMUSG00000030729.18	chr7:99876601-99928075	Pgm2l1	protein_coding	MGI:1918224	0.166298	0.0713596	2.33042	0.0197841	0.406331
ENSMUSG00000023284	ENSMUSG00000023284.16	chr5:110257958-110277660	Zfp605	protein_coding	MGI:2444933	0.194313	0.0834429	2.3287	0.019875	0.407195
ENSMUSG00000097558	ENSMUSG00000097558.2	chr19:34452208-34458946	Gm26902	lncRNA	MGI:5477396	-0.913939	0.392473	-2.32867	0.0198766
ENSMUSG00000073600	ENSMUSG00000073600.6	chr18:35783404-35788291	Prob1	protein_coding	MGI:2686460	-0.231624	0.0994961	-2.32797	0.0199137	0.407195
ENSMUSG00000026610	ENSMUSG00000026610.14	chr1:187340988-187947082	Esrrg	protein_coding	MGI:1347056	-0.214884	0.0923506	-2.32682	0.0199747	0.407418
ENSMUSG00000038187	ENSMUSG00000038187.15	chr7:112914833-112968599	Btbd10	protein_coding	MGI:1916065	0.126887	0.0545959	2.32412	0.020119	0.409594
ENSMUSG00000030226	ENSMUSG00000030226.13	chr6:138339916-138558966	Lmo3	protein_coding	MGI:102810	0.129168	0.0556036	2.32301	0.0201787	0.410036
ENSMUSG00000061462	ENSMUSG00000061462.19	chr11:58885082-59029996	Obscn	protein_coding	MGI:2681862	-0.584349	0.25159	-2.32262	0.0201994	0.410036
ENSMUSG00000056515	ENSMUSG00000056515.10	chr17:65958724-66079747	Rab31	protein_coding	MGI:1914603	-0.114841	0.0494754	-2.32117	0.0202779	0.411032
ENSMUSG00000026024	ENSMUSG00000026024.15	chr1:59202085-59276390	Als2	protein_coding	MGI:1921268	0.136216	0.0587548	2.31839	0.0204282	0.413478
ENSMUSG00000000202	ENSMUSG00000000202.10	chr11:114682043-114686771	Btbd17	protein_coding	MGI:1919264	-0.167655	0.0723956	-2.31581	0.0205686	0.415293
ENSMUSG00000036295	ENSMUSG00000036295.6	chr12:41501667-41536430	Lrrn3	protein_coding	MGI:106036	0.189134	0.0816763	2.31565	0.0205773	0.415293
ENSMUSG00000045733	ENSMUSG00000045733.8	chr7:139730541-139734790	Sprn	protein_coding	MGI:3582583	0.153165	0.0661935	2.31389	0.0206736	0.416634
ENSMUSG00000015202	ENSMUSG00000015202.14	chr10:7069063-7162237	Cnksr3	protein_coding	MGI:2674130	-0.215276	0.0930657	-2.31316	0.0207141	0.416705
ENSMUSG00000020546	ENSMUSG00000020546.15	chr11:90367318-90528910	Stxbp4	protein_coding	MGI:1342296	0.172969	0.0748275	2.31158	0.020801	0.416705
ENSMUSG00000023961	ENSMUSG00000023961.17	chr17:44407199-44416700	Enpp4	protein_coding	MGI:2682634	-0.140289	0.0607008	-2.31116	0.0208241	0.416705
ENSMUSG00000085615	ENSMUSG00000085615.3	chr14:122340842-122344386	A330035P11Rik	lncRNA	MGI:2442610	0.694085	0.300351	2.31091	0.0208377
ENSMUSG00000054453	ENSMUSG00000054453.12	chrX:9751861-9860782	Sytl5	protein_coding	MGI:2668451	0.310577	0.134486	2.30937	0.020923	0.416705
ENSMUSG00000033900	ENSMUSG00000033900.14	chr3:82265351-82302575	Map9	protein_coding	MGI:2442208	0.126865	0.0549378	2.30925	0.0209297	0.416705
ENSMUSG00000074829	ENSMUSG00000074829.11	chr9:124054434-124075326	2010315B03Rik	protein_coding	MGI:1919321	0.179749	0.0778435	2.30911	0.0209373	0.416705
ENSMUSG00000060735	ENSMUSG00000060735.5	chr15:11033803-11038077	Rxfp3	protein_coding	MGI:2441827	0.584892	0.253454	2.30769	0.0210166
ENSMUSG00000025856	ENSMUSG00000025856.16	chr5:138961769-138983125	Pdgfa	protein_coding	MGI:97527	-0.134115	0.0581299	-2.30717	0.0210456	0.416705
ENSMUSG00000045777	ENSMUSG00000045777.15	chr7:141879574-141927490	Ifitm10	protein_coding	MGI:2444776	-0.195585	0.0847799	-2.30697	0.0210563	0.416705
ENSMUSG00000037239	ENSMUSG00000037239.9	chr7:28858254-28869836	Spred3	protein_coding	MGI:2142186	0.148784	0.0645135	2.30624	0.0210972	0.416705
ENSMUSG00000040612	ENSMUSG00000040612.14	chr1:166081708-166144392	Ildr2	protein_coding	MGI:1196370	0.200851	0.0870917	2.3062	0.0210993	0.416705
ENSMUSG00000038695	ENSMUSG00000038695.14	chr7:44117404-44121086	Josd2	protein_coding	MGI:1913374	-0.145669	0.0631659	-2.30613	0.0211031	0.416705
ENSMUSG00000004902	ENSMUSG00000004902.8	chr6:120750539-120771297	Slc25a18	protein_coding	MGI:1919053	-0.150579	0.0652962	-2.30609	0.0211054	0.416705
ENSMUSG00000031543	ENSMUSG00000031543.19	chr8:23464860-23640513	Ank1	protein_coding	MGI:88024	-0.189929	0.0823746	-2.30567	0.0211288	0.416705
ENSMUSG00000071042	ENSMUSG00000071042.13	chr17:75742891-75836049	Rasgrp3	protein_coding	MGI:3028579	-0.173302	0.0751723	-2.3054	0.0211444	0.416705
ENSMUSG00000031285	ENSMUSG00000031285.15	chrX:142638838-142716307	Dcx	protein_coding	MGI:1277171	0.252458	0.109522	2.30509	0.0211614	0.416705
ENSMUSG00000074785	ENSMUSG00000074785.6	chr10:94626728-94780697	Plxnc1	protein_coding	MGI:1890127	0.390461	0.169474	2.30396	0.0212249	0.416705
ENSMUSG00000020029	ENSMUSG00000020029.7	chr10:95382869-95400008	Nudt4	protein_coding	MGI:1918457	-0.131327	0.0570024	-2.30388	0.0212292	0.416705
ENSMUSG00000030553	ENSMUSG00000030553.4	chr7:67886358-67913981	Pgpep1l	protein_coding	MGI:1925694	1.02073	0.44316	2.30331	0.0212616
ENSMUSG00000102336	ENSMUSG00000102336.2	chr1:34466083-34472345	Gm37233	lncRNA	MGI:5610461	0.28245	0.122634	2.3032	0.0212676	0.416705
ENSMUSG00000002475	ENSMUSG00000002475.17	chr18:10642092-10706771	Abhd3	protein_coding	MGI:2147183	-0.132807	0.05768	-2.30248	0.0213082	0.416705
ENSMUSG00000041598	ENSMUSG00000041598.8	chr11:113617676-113642707	Cdc42ep4	protein_coding	MGI:1929760	-0.142729	0.0620206	-2.30132	0.0213736	0.416705
ENSMUSG00000004661	ENSMUSG00000004661.16	chr9:57697636-57744076	Arid3b	protein_coding	MGI:1930768	-0.251008	0.1091	-2.30072	0.0214074	0.416705
ENSMUSG00000019806	ENSMUSG00000019806.14	chr10:13522798-13744724	Aig1	protein_coding	MGI:1913503	-0.163108	0.0708958	-2.30067	0.0214101	0.416705
ENSMUSG00000026238	ENSMUSG00000026238.15	chr1:86454448-86458434	Ptma	protein_coding	MGI:97803	-0.135255	0.058794	-2.30048	0.0214209	0.416705
ENSMUSG00000035615	ENSMUSG00000035615.13	chr4:45184875-45285936	Frmpd1	protein_coding	MGI:2446274	-0.250457	0.108873	-2.30044	0.021423	0.416705
ENSMUSG00000022783	ENSMUSG00000022783.12	chr16:16570880-16647320	Spag6l	protein_coding	MGI:1354388	0.265743	0.115601	2.29881	0.0215159	0.417929
ENSMUSG00000030657	ENSMUSG00000030657.12	chr7:116980214-117272803	Xylt1	protein_coding	MGI:2451073	0.160569	0.069868	2.29817	0.0215519	0.418047
ENSMUSG00000113527	ENSMUSG00000113527.2	chr12:116243302-116243851	Gm48079	lncRNA	MGI:6097416	-0.882626	0.384447	-2.29583	0.0216855
ENSMUSG00000036545	ENSMUSG00000036545.10	chr11:50492911-50698400	Adamts2	protein_coding	MGI:1347356	-0.204719	0.089227	-2.29436	0.0217697	0.421178
ENSMUSG00000075470	ENSMUSG00000075470.3	chr15:90108514-90117674	Alg10b	protein_coding	MGI:2146159	0.119812	0.0522216	2.29429	0.0217736	0.421178
ENSMUSG00000002617	ENSMUSG00000002617.15	chr17:23392843-23412226	Zfp40	protein_coding	MGI:99185	0.187113	0.08158	2.29362	0.0218125	0.421271
ENSMUSG00000040389	ENSMUSG00000040389.16	chr3:108498595-108553035	Wdr47	protein_coding	MGI:2139593	0.108161	0.0471667	2.29316	0.0218388	0.421271
ENSMUSG00000049807	ENSMUSG00000049807.17	chr11:97306359-97393228	Arhgap23	protein_coding	MGI:3697726	-0.11468	0.0500552	-2.29107	0.0219591	0.42229
ENSMUSG00000026074	ENSMUSG00000026074.16	chr1:39940073-40065470	Map4k4	protein_coding	MGI:1349394	-0.105675	0.0461326	-2.29067	0.0219823	0.42229
ENSMUSG00000010175	ENSMUSG00000010175.14	chr1:189850232-189902911	Prox1	protein_coding	MGI:97772	-0.224124	0.0979084	-2.28912	0.0220724	0.423128
ENSMUSG00000021929	ENSMUSG00000021929.10	chr14:61602660-61677323	Kpna3	protein_coding	MGI:1100863	0.117619	0.051394	2.28858	0.0221038	0.423128
ENSMUSG00000008035	ENSMUSG00000008035.13	chrX:10581252-10585929	Mid1ip1	protein_coding	MGI:1915291	-0.127094	0.0555431	-2.2882	0.0221256	0.423128
ENSMUSG00000054814	ENSMUSG00000054814.15	chr5:74159114-74229092	Usp46	protein_coding	MGI:1916977	0.118406	0.0517545	2.28783	0.0221471	0.423128
ENSMUSG00000040452	ENSMUSG00000040452.10	chr15:20449351-21589619	Cdh12	protein_coding	MGI:109503	0.255019	0.111531	2.28652	0.0222238	0.423436
ENSMUSG00000020108	ENSMUSG00000020108.5	chr10:59785491-59787656	Ddit4	protein_coding	MGI:1921997	-0.128941	0.0563968	-2.28631	0.0222361	0.423436
ENSMUSG00000028917	ENSMUSG00000028917.15	chr4:141353045-141392210	Plekhm2	protein_coding	MGI:1916832	-0.135235	0.0591687	-2.28557	0.0222792	0.423436
ENSMUSG00000044948	ENSMUSG00000044948.18	chr19:47725296-47907726	Cfap43	protein_coding	MGI:1289258	0.701149	0.306783	2.28548	0.0222845	0.423436
ENSMUSG00000025204	ENSMUSG00000025204.11	chr19:44537011-44543879	Ndufb8	protein_coding	MGI:1914514	-0.127901	0.0559794	-2.28479	0.0223251	0.423632
ENSMUSG00000022257	ENSMUSG00000022257.5	chr15:34238174-34284448	Laptm4b	protein_coding	MGI:1890494	-0.13107	0.0574142	-2.28288	0.0224372	0.425181
ENSMUSG00000002897	ENSMUSG00000002897.6	chr6:120440208-120464520	Il17ra	protein_coding	MGI:107399	-0.205902	0.0902438	-2.28161	0.0225121	0.426022
ENSMUSG00000048732	ENSMUSG00000048732.6	chr11:100353440-100363567	Klhl11	protein_coding	MGI:2388648	0.201007	0.0881488	2.28031	0.0225892	0.426903
ENSMUSG00000052914	ENSMUSG00000052914.5	chr4:96404375-96441898	Cyp2j6	protein_coding	MGI:1270148	-0.158952	0.0697661	-2.27836	0.0227051	0.427591
ENSMUSG00000023495	ENSMUSG00000023495.14	chr9:106330490-106341211	Pcbp4	protein_coding	MGI:1890471	-0.11141	0.0489063	-2.27802	0.0227252	0.427591
ENSMUSG00000006740	ENSMUSG00000006740.15	chr18:6201002-6242174	Kif5b	protein_coding	MGI:1098268	-0.144028	0.0632309	-2.2778	0.0227382	0.427591
ENSMUSG00000066643	ENSMUSG00000066643.13	chr12:9023892-9078847	Wdr35	protein_coding	MGI:1921932	0.128901	0.0565943	2.27764	0.0227481	0.427591
ENSMUSG00000026083	ENSMUSG00000026083.13	chr1:38037091-38094660	Eif5b	protein_coding	MGI:2441772	-0.107479	0.0471994	-2.27712	0.0227791	0.427598
ENSMUSG00000021071	ENSMUSG00000021071.18	chr12:70291307-70394388	Trim9	protein_coding	MGI:2137354	0.107988	0.0474524	2.27572	0.0228628	0.428593
ENSMUSG00000015341	ENSMUSG00000015341.18	chr8:23731362-23747090	Golga7	protein_coding	MGI:1931029	-0.12697	0.0558365	-2.27396	0.0229683	0.42948
ENSMUSG00000027882	ENSMUSG00000027882.19	chr3:108700492-108747842	Stxbp3	protein_coding	MGI:107362	-0.147772	0.0649858	-2.27391	0.0229716	0.42948
ENSMUSG00000022742	ENSMUSG00000022742.7	chr16:58490655-58537999	Cpox	protein_coding	MGI:104841	-0.128937	0.0567457	-2.27218	0.0230755	0.430846
ENSMUSG00000002017	ENSMUSG00000002017.11	chr17:75844081-75858941	Fam98a	protein_coding	MGI:1919972	-0.15209	0.067015	-2.2695	0.0232381	0.432148
ENSMUSG00000045620	ENSMUSG00000045620.8	chr9:56755943-56771963	Odf3l1	protein_coding	MGI:2681875	-1.9267	0.849414	-2.26827	0.0233128
ENSMUSG00000038917	ENSMUSG00000038917.5	chr8:10974427-10978696	3930402G23Rik	lncRNA	MGI:1921277	1.9655	0.866562	2.26816	0.0233195
ENSMUSG00000021057	ENSMUSG00000021057.16	chr12:76371665-76380927	Akap5	protein_coding	MGI:2685104	0.154822	0.0683027	2.2667	0.0234087	0.4331
ENSMUSG00000052544	ENSMUSG00000052544.10	chr3:152903903-153430811	St6galnac3	protein_coding	MGI:1341828	-0.201081	0.0887135	-2.26663	0.0234126	0.4331
ENSMUSG00000032174	ENSMUSG00000032174.6	chr9:20943369-20950332	Icam5	protein_coding	MGI:109430	0.125926	0.0555565	2.26662	0.0234133	0.4331
ENSMUSG00000066189	ENSMUSG00000066189.10	chr7:122269715-122368616	Cacng3	protein_coding	MGI:1859165	0.114439	0.0505034	2.26597	0.0234533	0.433266
ENSMUSG00000022895	ENSMUSG00000022895.17	chr16:95502942-95522095	Ets2	protein_coding	MGI:95456	0.147811	0.0652461	2.26544	0.0234857	0.433291
ENSMUSG00000028955	ENSMUSG00000028955.4	chr4:151131757-151142420	Vamp3	protein_coding	MGI:1321389	-0.134125	0.0592353	-2.26427	0.0235575	0.434043
ENSMUSG00000089633	ENSMUSG00000089633.3	chr17:10675145-10711986	A230009B12Rik	lncRNA	MGI:2442666	-0.44186	0.195213	-2.26348	0.0236062	0.434367
ENSMUSG00000097767	ENSMUSG00000097767.9	chr5:112361094-112377261	Miat	lncRNA	MGI:2444886	0.177375	0.0784691	2.26045	0.0237935	0.436292
ENSMUSG00000018500	ENSMUSG00000018500.3	chr11:62139810-62157279	Adora2b	protein_coding	MGI:99403	-0.307062	0.135845	-2.26038	0.0237978	0.436292
ENSMUSG00000029840	ENSMUSG00000029840.9	chr6:35485841-35516823	Mtpn	protein_coding	MGI:99445	0.107983	0.0477795	2.26004	0.023819	0.436292
ENSMUSG00000040856	ENSMUSG00000040856.18	chr12:109418749-109429262	Dlk1	protein_coding	MGI:94900	0.763096	0.337688	2.25977	0.0238358	0.436292
ENSMUSG00000039270	ENSMUSG00000039270.10	chr4:70345302-70453232	Megf9	protein_coding	MGI:1918264	0.121077	0.0536371	2.25733	0.0239872	0.437574
ENSMUSG00000054958	ENSMUSG00000054958.7	chr4:123095297-123110068	Nt5c1a	protein_coding	MGI:2155700	0.324808	0.143891	2.25732	0.0239879	0.437574
ENSMUSG00000032118	ENSMUSG00000032118.17	chr9:36733160-36790220	Fez1	protein_coding	MGI:2670976	-0.106162	0.0471622	-2.251	0.0243857	0.44403
ENSMUSG00000032998	ENSMUSG00000032998.17	chr4:119394201-119486316	Foxj3	protein_coding	MGI:2443432	0.122945	0.0546351	2.25029	0.0244307	0.44427
ENSMUSG00000028584	ENSMUSG00000028584.4	chr4:143076327-143097602	Lrrc38	protein_coding	MGI:2442845	-0.483808	0.215137	-2.24884	0.0245226
ENSMUSG00000064357	ENSMUSG00000064357.1	chrM:7927-8607	mt-Atp6	protein_coding	MGI:99927	-0.202122	0.0899203	-2.24778	0.0245899	0.446026
ENSMUSG00000048581	ENSMUSG00000048581.13	chr3:63822105-63836893	E130311K13Rik	protein_coding	MGI:3607716	0.229678	0.10218	2.24777	0.0245911	0.446026
ENSMUSG00000054976	ENSMUSG00000054976.15	chr1:81054667-81319479	Nyap2	protein_coding	MGI:2443135	0.167216	0.0744978	2.24458	0.0247953	0.44842
ENSMUSG00000034310	ENSMUSG00000034310.9	chr5:127858694-128510141	Tmem132d	protein_coding	MGI:3044963	0.141961	0.0632569	2.2442	0.0248195	0.44842
ENSMUSG00000059810	ENSMUSG00000059810.19	chr4:62478084-62622238	Rgs3	protein_coding	MGI:1354734	-0.196217	0.0874757	-2.24311	0.02489	0.449114
ENSMUSG00000061393	ENSMUSG00000061393.15	chr9:119231184-119264061	Acvr2b	protein_coding	MGI:87912	0.225985	0.100797	2.24199	0.0249617	0.449803
[truncated: 356 more rows]

## Sheet: KO-2
GeneStableID	GeneID	Chr.Start.End	GeneName	GeneType	MGI_ID	log2FoldChange	lfcSE	stat	pvalue	padj	ASD.Gene	SFARI.Score	EAGLE.Annotation	TADA.FDR
[truncated: 379 more rows]
