# Supplementary material for: An X-linked long non-coding RNA, PTCHD1-AS, regulates autistic behaviors in humans and in mice
Source: Research Square preprint supplement (doi:10.21203/rs.3.rs-5619348/v1), 2025-01-13
Supplement: Supplementary file 22 [file Supplementary Table 7.xlsx]

## Sheet: D1_MSN
ensembl	gene	p_val.mean	p_val.std	avg_log2FC.mean	avg_log2FC.std	pct.1.mean	pct.2.mean	padj.mean	padj.std	ASD.status	TADA.FDR	EAGLE.annotation	EAGLE.score	EAGLE.concordance	SFARI.score	SFARI.syndromic
ENSMUSG00000020719	Ddx5	9.02939e-37	1.56376e-36	0.497739	0.0173812	0.985	0.947667	2.58746e-32	4.48111e-32
ENSMUSG00000063511	Snrnp70	5.86126e-25	6.95166e-25	0.442678	0.00858406	0.862	0.704333	1.6796e-20	1.99207e-20
ENSMUSG00000096768	Gm47283	8.60566e-22	1.47688e-21	0.444644	0.0363602	0.535	0.276667	2.46604e-17	4.23214e-17
ENSMUSG00000033981	Gria2	2.72754e-19	3.72749e-19	0.235501	0.0027619	1	0.999667	7.81603e-15	1.06815e-14	SFARI;EAGLE;TADA	0.0666362	Definitive	12	Concordant	1	0
ENSMUSG00000019505	Ubb	1.72201e-18	2.98007e-18	0.437199	0.0111014	0.563	0.344	4.93458e-14	8.53968e-14
ENSMUSG00000019039	Dalrd3	1.83846e-17	3.15227e-17	0.43187	0.0183922	0.629	0.427667	5.26828e-13	9.03316e-13
ENSMUSG00000032936	Camkv	3.47573e-17	3.80184e-17	0.400165	0.02514	0.856	0.718333	9.96006e-13	1.08945e-12
ENSMUSG00000026204	Ptprn	8.47803e-15	7.66855e-15	0.354704	0.00326004	0.799	0.662333	2.42946e-10	2.1975e-10
ENSMUSG00000036564	Ndrg4	2.69351e-14	4.09443e-14	0.340802	0.0185236	0.857	0.74	7.71851e-10	1.1733e-09
ENSMUSG00000021910	Nisch	2.21654e-13	2.69889e-13	0.325648	0.00963314	0.64	0.485667	6.35173e-09	7.73394e-09
ENSMUSG00000001270	Ckb	4.04414e-13	3.8392e-13	0.395567	0.0139805	0.794	0.679667	1.15889e-08	1.10016e-08
ENSMUSG00000097391	Mirg	6.27467e-13	1.08635e-12	0.355024	0.034047	0.771	0.628333	1.79807e-08	3.11306e-08
ENSMUSG00000045349	Sh2d5	5.6817e-12	7.36779e-12	0.290168	0.00885343	0.55	0.370667	1.62815e-07	2.11131e-07
ENSMUSG00000027419	Pcsk2	1.97688e-11	3.23656e-11	0.24803	0.0186398	0.996	0.986	5.66495e-07	9.2747e-07
ENSMUSG00000015656	Hspa8	4.35116e-11	7.51917e-11	0.312719	0.0229694	0.525	0.353667	1.24687e-06	2.15469e-06
ENSMUSG00000001983	Taco1	4.92067e-11	6.71844e-11	0.270454	0.0136821	0.443	0.282667	1.41007e-06	1.92524e-06
ENSMUSG00000045671	Spred2	1.06415e-10	6.00065e-11	-0.28781	0.0027431	0.416	0.576	3.04942e-06	1.71955e-06
ENSMUSG00000007783	Cpt1c	1.18728e-10	2.02184e-10	0.28878	0.0221993	0.637	0.484333	3.40226e-06	5.79379e-06
ENSMUSG00000031865	Dctn1	1.41817e-10	2.33411e-10	0.297872	0.0176192	0.479	0.323	4.06391e-06	6.68864e-06
ENSMUSG00000043432	Leng9	1.56364e-10	1.36562e-10	0.22667	0.0131681	0.318	0.169667	4.48076e-06	3.91333e-06
ENSMUSG00000030854	Ptpn5	3.91987e-10	4.89273e-10	0.285757	0.0195192	0.863	0.791667	1.12328e-05	1.40206e-05
ENSMUSG00000097545	Mir124a-1hg	4.84615e-10	3.70866e-10	0.266753	0.00128938	0.701	0.556333	1.38871e-05	1.06275e-05
ENSMUSG00000034892	Rps29	6.84383e-10	5.20119e-10	0.200918	0.00487087	0.266	0.132667	1.96117e-05	1.49045e-05
ENSMUSG00000039218	Srrm2	8.55149e-10	1.06109e-09	0.249241	0.0195542	0.859	0.783	2.45051e-05	3.04065e-05	SFARI					2	1
ENSMUSG00000038349	Plcl1	1.20151e-09	1.62768e-09	-0.444478	0.0319987	0.15	0.285333	3.44305e-05	4.66428e-05
ENSMUSG00000032572	Col6a4	1.48816e-09	1.23824e-09	0.126052	0.00430949	0.107	0.0243333	4.26447e-05	3.54831e-05
ENSMUSG00000034818	Celf5	1.51411e-09	1.70516e-09	0.228946	0.00473613	0.603	0.451	4.33884e-05	4.8863e-05
ENSMUSG00000013236	Ptprs	1.68755e-09	2.92e-09	0.283403	0.0269928	0.59	0.427	4.83584e-05	8.36755e-05
ENSMUSG00000057666	Gapdh	3.21792e-09	4.09562e-09	0.255144	0.00378431	0.513	0.367	9.22127e-05	0.000117364
ENSMUSG00000010086	Rnf112	4.86973e-09	1.90411e-09	0.274326	0.00130797	0.585	0.462	0.000139547	5.45643e-05
ENSMUSG00000030695	Aldoa	5.30253e-09	9.11362e-09	0.26277	0.0310245	0.5	0.332	0.000151949	0.00026116
ENSMUSG00000034135	Sik3	5.30623e-09	8.54404e-09	-0.325938	0.0290273	0.787	0.858333	0.000152055	0.000244838
ENSMUSG00000004267	Eno2	8.22569e-09	1.3792e-08	0.252173	0.0178981	0.451	0.302	0.000235716	0.000395223
ENSMUSG00000064293	Cntn4	1.48616e-08	2.22208e-08	-0.293788	0.0234872	0.926	0.947667	0.000425875	0.00063676	SFARI					2	0
ENSMUSG00000021268	Meg3	1.48798e-08	2.25386e-08	0.152282	0.0308445	0.999	1	0.000426395	0.000645866
ENSMUSG00000030064	Frmd4b	1.89457e-08	1.93324e-08	-0.271372	0.0206317	0.478	0.604	0.000542907	0.00055399
ENSMUSG00000058740	Kcnt1	2.27996e-08	3.85714e-08	0.280219	0.0171728	0.694	0.576667	0.000653346	0.0011053
ENSMUSG00000033585	Ndn	3.27591e-08	3.89127e-08	0.140862	0.00812241	0.147	0.0546667	0.000938746	0.00111508
ENSMUSG00000004933	Matk	5.49611e-08	4.98352e-08	0.232998	0.0251835	0.518	0.376333	0.00157497	0.00142808
ENSMUSG00000057897	Camk2b	8.23611e-08	5.07736e-08	0.225936	0.00687429	0.854	0.795667	0.00236014	0.00145497	SFARI						1
ENSMUSG00000035885	Cox8a	1.15371e-07	1.98551e-07	0.281405	0.038518	0.384	0.242667	0.00330606	0.00568969
ENSMUSG00000035545	Leng8	1.22399e-07	4.33581e-08	0.232065	0.00318773	0.438	0.308	0.00350748	0.00124247
ENSMUSG00000057322	Rpl38	1.58239e-07	1.47428e-07	0.163093	0.0185665	0.187	0.084	0.00453451	0.00422471
ENSMUSG00000031425	Plp1	1.95566e-07	3.24462e-07	-0.602586	0.104206	0.06	0.148333	0.00560414	0.00929779
ENSMUSG00000047714	Ppp1r2	2.03976e-07	2.43867e-07	0.262896	0.0098112	0.724	0.612667	0.00584514	0.00698824
ENSMUSG00000026197	Zfand2b	2.38707e-07	1.7518e-07	0.137504	0	0.175	0.081	0.00684039	0.00501996
ENSMUSG00000039001	Rps21	2.61345e-07	2.42714e-07	0.175178	0.0045818	0.26	0.149	0.00748909	0.00695521
ENSMUSG00000027134	Lpcat4	3.10082e-07	4.2136e-07	0.168296	0.0103611	0.243	0.132667	0.0088857	0.0120745
ENSMUSG00000036427	Gpi1	3.29978e-07	5.37684e-07	0.241383	0.01479	0.519	0.393333	0.00945585	0.0154079
ENSMUSG00000006676	Usp19	3.65481e-07	2.40996e-07	0.193508	0.00172571	0.316	0.200333	0.0104732	0.00690598
ENSMUSG00000037703	Lzts3	3.95797e-07	6.71782e-07	0.223197	0.0195741	0.481	0.340667	0.011342	0.0192506
ENSMUSG00000023150	Ivns1abp	4.45985e-07	7.71846e-07	0.310005	0.051836	0.704	0.623667	0.0127801	0.022118
ENSMUSG00000014313	Cox6c	5.79778e-07	5.56285e-07	0.214596	0.0111596	0.347	0.226	0.0166141	0.0159409
ENSMUSG00000024238	Zeb1	8.11735e-07	1.31354e-06	-0.224182	0.0213605	0.871	0.910333	0.0232611	0.0376407
ENSMUSG00000097736	9530059O14Rik	9.77854e-07	1.64807e-06	-0.239855	0.0243619	0.832	0.884333	0.0280214	0.0472271
ENSMUSG00000023800	Tiam2	1.15372e-06	1.15819e-06	0.239954	0.0253658	0.64	0.520333	0.033061	0.033189
ENSMUSG00000061718	Ppp1r1b	1.1701e-06	1.47922e-06	0.210621	0.0174889	0.547	0.427333	0.0335305	0.0423885	SFARI					2	0
ENSMUSG00000013997	Nit1	1.4516e-06	1.24109e-06	0.15974	0.00762466	0.25	0.145667	0.0415969	0.0355648
ENSMUSG00000040249	Lrp1	1.48592e-06	2.10015e-06	0.203353	0.0187527	0.465	0.336667	0.0425804	0.060182	SFARI					2	0
ENSMUSG00000041607	Mbp	1.62314e-06	2.80632e-06	-0.318636	0.0283546	0.154	0.268333	0.0465128	0.0804178
ENSMUSG00000039578	Ccser1	1.64946e-06	1.57009e-06	-0.19609	0.0133573	0.984	0.986	0.0472668	0.0449924	SFARI					2	0
ENSMUSG00000021546	Hnrnpk	1.73037e-06	2.56394e-06	0.19219	0.0152953	0.435	0.312667	0.0495854	0.0734724	SFARI					2	1
ENSMUSG00000029108	Pcdh7	2.31163e-06	3.31515e-06	-0.297964	0.0214205	0.699	0.792	0.066242	0.0949989
ENSMUSG00000034265	Zdhhc14	2.33679e-06	3.61059e-06	-0.250389	0.0269025	0.837	0.878333	0.0669631	0.103465
ENSMUSG00000035781	R3hdm4	3.09919e-06	5.18225e-06	0.177461	0.014785	0.313	0.194667	0.0888105	0.148503
ENSMUSG00000029713	Gnb2	3.18027e-06	3.83428e-06	0.192552	0.0129674	0.397	0.273333	0.0911337	0.109875	SFARI						1
ENSMUSG00000016933	Plcg1	3.47209e-06	5.96781e-06	0.164672	0.0159539	0.247	0.136667	0.0994961	0.171013
ENSMUSG00000016349	Eef1a2	3.52888e-06	4.26104e-06	0.149299	0.0145405	0.275	0.165	0.101124	0.122104	SFARI						1
ENSMUSG00000041697	Cox6a1	3.82071e-06	3.45977e-06	0.212842	0.005869	0.341	0.235	0.109486	0.0991432
ENSMUSG00000107872	Gm44511	4.19681e-06	5.81526e-06	0.201029	0.0280236	0.579	0.463667	0.120264	0.166642
ENSMUSG00000016319	Slc25a5	4.22228e-06	7.17153e-06	0.188642	0.0208758	0.291	0.18	0.120994	0.205507
ENSMUSG00000029328	Hnrnpdl	4.25243e-06	4.02151e-06	0.20154	0.0120458	0.597	0.499	0.121858	0.11524
ENSMUSG00000026773	Pfkfb3	4.44479e-06	2.0002e-06	-0.154328	0.0106746	0.149	0.245	0.12737	0.0573178
ENSMUSG00000057378	Ryr3	5.37451e-06	1.24829e-06	-0.15589	0.0117458	0.996	0.998	0.154012	0.035771
ENSMUSG00000021448	Shc3	5.57373e-06	4.51018e-06	-0.203189	0.0189824	0.384	0.486667	0.159721	0.129244
ENSMUSG00000055254	Ntrk2	6.90388e-06	6.59392e-06	-0.280391	0.0559118	0.765	0.839	0.197838	0.188955	SFARI						1
ENSMUSG00000003346	Abhd17a	7.92789e-06	5.33357e-06	0.108784	0.0040811	0.154	0.076	0.227182	0.152839
ENSMUSG00000026959	Grin1	8.45093e-06	3.97055e-07	0.197618	0.00411148	0.84	0.796333	0.24217	0.011378	SFARI					1	0
ENSMUSG00000054162	Spock3	8.66777e-06	8.20651e-06	-0.160248	0.00914804	0.993	0.997333	0.248384	0.235166
ENSMUSG00000025272	Tro	8.93711e-06	1.41621e-05	0.181657	0.0210339	0.381	0.268667	0.256102	0.40583
ENSMUSG00000024830	Rps6kb2	9.58784e-06	6.19014e-06	0.159409	0.00943823	0.343	0.235667	0.274749	0.177385
ENSMUSG00000023452	Pisd	9.63812e-06	1.24743e-05	0.114122	0.0146813	0.156	0.0753333	0.27619	0.357464
ENSMUSG00000062044	Lmtk3	9.69666e-06	1.62661e-05	0.187302	0.0296135	0.391	0.268	0.277867	0.466121	SFARI					3	0
ENSMUSG00000038518	Jarid2	1.02339e-05	9.6623e-06	-0.203453	0.0249196	0.744	0.829	0.293264	0.276883	SFARI					2	0
ENSMUSG00000002459	Rgs20	1.0855e-05	9.39588e-06	-0.223935	0.0341868	0.772	0.837667	0.31106	0.269248
ENSMUSG00000025225	Nfkb2	1.11908e-05	1.36027e-05	0.120042	0.00486966	0.171	0.0886667	0.320684	0.3898
ENSMUSG00000033510	Otud7a	1.1256e-05	7.15633e-06	-0.203252	0.00650967	0.654	0.742333	0.322553	0.205072	SFARI					2	0
ENSMUSG00000027351	Spred1	1.15072e-05	1.77051e-05	-0.192858	0.0308901	0.622	0.728	0.329749	0.507357
ENSMUSG00000037996	Slc24a2	1.20817e-05	1.82432e-05	-0.231881	0.0178165	0.843	0.903333	0.346214	0.522777	SFARI					2	0
ENSMUSG00000025422	Agap2	1.23184e-05	1.61436e-05	0.1477	0.00610499	0.374	0.259	0.352995	0.462612	SFARI					2	0
ENSMUSG00000053465	Hs6st3	1.24375e-05	1.16846e-05	-0.213395	0.0328313	0.94	0.961333	0.35641	0.334835
ENSMUSG00000061904	Slc25a3	1.25084e-05	7.20883e-06	0.213579	0.00247766	0.597	0.501	0.358442	0.206576
ENSMUSG00000022378	Cyrib	1.48992e-05	1.59482e-05	-0.173681	0.0106106	0.619	0.712333	0.426951	0.457011
ENSMUSG00000008658	Rbfox1	1.56212e-05	2.52514e-05	-0.138567	0.0119932	1	1	0.353473	0.560671	SFARI					2	0
ENSMUSG00000115718	Gm49179	1.58838e-05	1.35378e-05	0.135091	0.00684141	0.162	0.0846667	0.455166	0.387939
ENSMUSG00000020923	Ubtf	1.63005e-05	1.69345e-05	0.129792	0.00466996	0.274	0.170667	0.467107	0.485275
ENSMUSG00000032586	Traip	1.78316e-05	4.75011e-06	0.165693	0.0128323	0.534	0.429333	0.510981	0.136119
ENSMUSG00000031818	Cox4i1	1.80785e-05	2.88208e-05	0.208163	0.0141786	0.337	0.233333	0.360983	0.554038
ENSMUSG00000052105	Mtcl1	1.99641e-05	2.42698e-05	-0.18206	0.0136513	0.6	0.685667	0.452322	0.493829
ENSMUSG00000002010	Idh3g	2.06692e-05	1.43637e-05	0.127399	0.00285302	0.218	0.130333	0.570072	0.373196
ENSMUSG00000027406	Idh3b	2.08362e-05	2.71073e-05	0.177011	0.0155299	0.429	0.319	0.438025	0.509254
ENSMUSG00000036882	Arhgap33	2.19829e-05	8.79173e-06	0.153566	0.00565103	0.374	0.268667	0.629941	0.251936
ENSMUSG00000022269	Marchf11	2.38628e-05	1.79204e-05	-0.181486	0.0279531	0.197	0.295	0.658247	0.485324
ENSMUSG00000055013	Agap1	2.75005e-05	4.07213e-05	-0.201407	0.016803	0.626	0.713667	0.410834	0.517738	SFARI					2	0
ENSMUSG00000037351	Actr1b	2.80211e-05	4.73994e-05	0.167528	0.0223225	0.371	0.256	0.345853	0.566545
ENSMUSG00000062078	Qk	2.9758e-05	2.53165e-05	-0.305316	0.00754585	0.321	0.419333	0.622985	0.328731
ENSMUSG00000025372	Baiap2	3.18951e-05	2.25886e-05	0.181773	0.00896264	0.859	0.797667	0.715105	0.361045
ENSMUSG00000028137	Celf3	3.28086e-05	3.43105e-05	0.133334	0.00407295	0.365	0.258667	0.582223	0.365664
ENSMUSG00000015476	Prrt1	3.32092e-05	5.64672e-05	0.150914	0.0189436	0.343	0.23	0.344947	0.567301
ENSMUSG00000041351	Rap1gap	3.38109e-05	5.59682e-05	0.209264	0.0249327	0.743	0.653333	0.361962	0.552682
ENSMUSG00000001415	Smg5	3.49447e-05	2.56199e-05	0.202786	0.0161538	0.41	0.314333	0.718261	0.487985
ENSMUSG00000031673	Cdh11	3.49549e-05	6.04934e-05	-0.273659	0.0576841	0.531	0.652333	0.333887	0.576871	SFARI					2	0
ENSMUSG00000079641	Rpl39	3.49873e-05	5.75194e-05	0.109788	0.00870778	0.128	0.0576667	0.36733	0.54808
ENSMUSG00000033526	Ppip5k1	3.5942e-05	2.92781e-05	0.168008	0.015855	0.438	0.329667	0.691127	0.534984
ENSMUSG00000062825	Actg1	3.82406e-05	4.81488e-05	0.156489	0.0115926	0.337	0.231667	0.545737	0.496265
ENSMUSG00000032020	Ubash3b	3.92939e-05	5.98458e-05	-0.147728	0.0243719	0.125	0.214333	0.424093	0.500261
ENSMUSG00000034175	Rhbdd3	4.10683e-05	5.90402e-05	0.125465	0.0199815	0.187	0.103	0.470966	0.497223
ENSMUSG00000057738	Sptan1	4.20862e-05	7.0627e-05	0.214005	0.0226389	0.716	0.628	0.358385	0.555948
ENSMUSG00000045045	Lrfn4	4.2723e-05	2.14868e-05	0.0843702	0.00202058	0.104	0.0456667	0.887535	0.194796
ENSMUSG00000041216	Clvs1	4.29242e-05	4.15339e-05	-0.212668	0.0446937	0.722	0.798333	0.666733	0.577236
ENSMUSG00000056185	Snx32	4.66566e-05	4.56438e-05	0.150789	0.00860597	0.322	0.225	0.731047	0.346927
ENSMUSG00000005705	Agrp	5.19557e-05	5.07213e-05	0.139344	0.0158901	0.246	0.156	0.710166	0.502007
ENSMUSG00000067288	Rps28	5.89409e-05	9.9284e-05	0.105662	0.0110838	0.135	0.0623333	0.364379	0.55197
ENSMUSG00000011257	Pabpc4	6.02499e-05	2.52984e-05	0.168846	0.00564707	0.34	0.245667	0.970847	0.0504946
ENSMUSG00000090733	Rps27	6.09793e-05	5.82151e-05	0.117597	0.00840965	0.21	0.126667	0.718786	0.487078
ENSMUSG00000009555	Cdk9	6.25145e-05	8.87334e-05	0.153972	0.0110098	0.278	0.184667	0.550403	0.413951
ENSMUSG00000006299	Aamp	6.63948e-05	9.03425e-05	0.0979627	0.00569339	0.141	0.072	0.60529	0.341829
ENSMUSG00000007892	Rplp1	6.79295e-05	0.000116216	0.195525	0.0254854	0.396	0.287	0.349242	0.56382
ENSMUSG00000034488	Edil3	6.79862e-05	5.06001e-05	-0.294622	0.0455835	0.288	0.375	0.937532	0.108197
ENSMUSG00000032625	Thsd7a	8.20274e-05	0.000141027	-0.223467	0.0425713	0.846	0.893667	0.344909	0.567435
ENSMUSG00000022961	Son	8.23438e-05	7.59109e-05	0.189026	0.00494766	0.857	0.813333	1	0	SFARI;EAGLE		Moderate	11	Discordant	1	1
ENSMUSG00000024462	Gabbr1	8.24826e-05	7.81991e-05	0.164867	0.0149961	0.625	0.532667	0.704478	0.511859
ENSMUSG00000024548	Setbp1	8.4156e-05	0.000140869	-0.204692	0.0372792	0.481	0.590333	0.387611	0.536344	SFARI					1	0
ENSMUSG00000005682	Pan2	8.47428e-05	8.22446e-05	0.0937458	0.00906551	0.131	0.065	0.76315	0.410236
ENSMUSG00000105265	Sox2ot	8.60174e-05	0.000148923	-0.290412	0.0678564	0.144	0.248667	0.334034	0.576745
ENSMUSG00000026740	Dnajc1	0.000101349	1.46457e-05	-0.211792	0.0158761	0.644	0.701667	1	0
ENSMUSG00000040907	Atp1a3	0.000107532	0.000100803	0.163378	0.00917259	0.556	0.449	0.965195	0.0602842	SFARI					2	1
ENSMUSG00000026207	Speg	0.000109017	0.000145514	0.160206	0.0121329	0.51	0.411	0.71531	0.493097
ENSMUSG00000029580	Actb	0.000111355	7.08134e-05	0.209215	0.00859093	0.528	0.453333	0.957906	0.0729087	SFARI;EAGLE		Limited	1	Discordant	1	1
ENSMUSG00000034799	Unc13a	0.000119503	0.000142359	0.130573	0.0101223	0.501	0.388333	0.86125	0.240321	SFARI					2	1
ENSMUSG00000015143	Actn1	0.000120746	0.000143124	0.209479	0.0138376	0.694	0.636667	0.921914	0.135249
ENSMUSG00000084849	Gm16105	0.000121477	0.000114814	0.12496	0.0109603	0.241	0.155	0.70684	0.507768
ENSMUSG00000072235	Tuba1a	0.000121745	0.000103964	0.152387	0.0122537	0.269	0.180667	0.722581	0.480504
ENSMUSG00000029838	Ptn	0.000127322	0.000179759	-0.212214	0.0265215	0.385	0.475667	0.719986	0.484999
ENSMUSG00000000632	Sez6	0.00013018	0.000217915	0.197544	0.0370916	0.619	0.531333	0.41724	0.519642
ENSMUSG00000098274	Rpl24	0.000131191	9.40225e-05	0.0953312	0.0052191	0.135	0.0713333	0.883908	0.201078
ENSMUSG00000033307	Mif	0.000137959	0.000200534	0.121771	0.00890354	0.184	0.107667	0.757557	0.242188
ENSMUSG00000046364	Rpl27a	0.000140273	0.000110074	0.103027	0.00991444	0.16	0.0903333	0.811289	0.326857
ENSMUSG00000033161	Atp1a1	0.000140379	0.00023767	0.173289	0.0229574	0.412	0.306333	0.39373	0.525896	SFARI					2	1
ENSMUSG00000025393	Atp5b	0.000142772	0.000223598	0.169388	0.0199253	0.465	0.362	0.596059	0.411974
ENSMUSG00000031391	L1cam	0.00014637	0.000230456	0.155549	0.0168339	0.266	0.175	0.591358	0.499731
ENSMUSG00000039474	Wfs1	0.000152232	0.000117344	0.103321	0.0131092	0.212	0.131	0.828519	0.297013
ENSMUSG00000049422	Chchd10	0.000156065	0.000251045	0.132576	0.0202945	0.284	0.187667	0.545844	0.393372
ENSMUSG00000022199	Slc22a17	0.000160716	0.000215684	0.177394	0.02908	0.618	0.526333	0.705475	0.510132
ENSMUSG00000018770	Atp5g3	0.000167051	0.000245173	0.132354	0.0116478	0.234	0.149333	0.707933	0.505875
ENSMUSG00000032174	Icam5	0.000171318	0.000194155	0.146071	0.0236941	0.479	0.371333	0.675283	0.562427
ENSMUSG00000020464	Pnpt1	0.000176809	0.000281495	0.172542	0.0265156	0.313	0.219667	0.610183	0.526402
ENSMUSG00000026082	Rev1	0.000180474	0.000301	0.193977	0.0274785	0.65	0.568667	0.4613	0.472902
ENSMUSG00000029576	Radil	0.000192776	0.000116343	0.115892	0.0046987	0.253	0.169333	1	0
ENSMUSG00000035569	Ankrd11	0.000201081	0.000338173	-0.174838	0.0227064	0.678	0.731333	0.444907	0.4843	SFARI;EAGLE;TADA	1.58e-05	Definitive	22.6	Concordant	1	1
ENSMUSG00000040351	Ankib1	0.000208701	0.00010659	-0.156775	0.012123	0.369	0.457667	1	0
ENSMUSG00000025579	Gaa	0.000210057	0.000207999	0.1174	0.00811491	0.254	0.171	1	0
ENSMUSG00000022840	Adcy5	0.000212937	0.000182561	0.123981	0.00916269	0.971	0.947	1	0	SFARI					2	0
ENSMUSG00000059213	Ddn	0.000225017	0.000293571	0.0965229	0.00691612	0.137	0.0736667	1	0
ENSMUSG00000002625	Akap8l	0.000232328	0.00035762	0.163824	0.0259023	0.719	0.642	0.709732	0.502758
ENSMUSG00000033577	Myo6	0.000240874	0.000129203	-0.0897525	0.00431018	0.063	0.121	1	0
ENSMUSG00000025279	Dnase1l3	0.000249703	0.000227593	0.197612	0.0304069	0.228	0.149667	0.68836	0.539776
ENSMUSG00000092074	Dynlt1a	0.000251938	0.000163873	0.0768177	0.00303727	0.122	0.0636667	1	0
ENSMUSG00000031618	Nr3c2	0.00025394	0.000323145	-0.210589	0.0234662	0.569	0.651667	1	0	SFARI					1	1
ENSMUSG00000072772	Grcc10	0.000254467	0.000215311	0.0935944	0.00938534	0.1	0.046	0.722517	0.480615	SFARI						1
ENSMUSG00000098243	Gm4258	0.00026477	0.000444102	-0.158531	0.0376379	0.171	0.258333	0.493193	0.438934
ENSMUSG00000034994	Eef2	0.000266094	0.000215278	0.102455	0.0082765	0.184	0.111333	0.874841	0.216781
ENSMUSG00000028833	Ncdn	0.000273695	0.000215446	0.141514	0.00490159	0.337	0.248333	1	0
ENSMUSG00000037679	Inf2	0.000275954	0.000328253	0.183255	0.0264582	0.591	0.513333	1	0
ENSMUSG00000017491	Rarb	0.00028701	0.000400446	-0.134259	0.013568	0.981	0.975	0.981412	0.0321952
ENSMUSG00000038437	Mllt6	0.000288446	0.000271693	0.123448	0.00536986	0.251	0.172	1	0
ENSMUSG00000004961	Syt5	0.000304227	0.000154011	0.131864	0.00911769	0.272	0.189667	1	0
ENSMUSG00000022194	Pabpn1	0.000305693	0.000398283	0.16125	0.0213564	0.549	0.45	0.708256	0.505316
ENSMUSG00000059921	Unc5c	0.000316472	0.000501892	-0.231108	0.0296285	0.387	0.488333	0.728496	0.470259
ENSMUSG00000044477	Zfand3	0.000321542	8.84467e-05	-0.152699	0.00302558	0.529	0.607667	1	0
ENSMUSG00000027012	Dync1i2	0.000341984	0.000144769	0.161543	0.00950327	0.785	0.716	1	0
ENSMUSG00000030122	Ptms	0.000345748	0.00034852	0.133941	0.0208138	0.287	0.202333	0.995366	0.0080265
ENSMUSG00000057421	Las1l	0.000352906	0.000573526	0.153869	0.0166119	0.34	0.244	0.734037	0.460661	SFARI					3	0
ENSMUSG00000006930	Hap1	0.000353782	0.000201616	0.137459	0.00615314	0.254	0.176333	1	0
ENSMUSG00000024736	Tmem132a	0.000360488	0.000454368	0.160455	0.0252828	0.247	0.167	0.690692	0.535737
ENSMUSG00000031310	Zmym3	0.000394301	6.01245e-05	0.116024	0.00468735	0.349	0.259333	1	0
ENSMUSG00000041881	Ndufa7	0.000394786	0.000461206	0.0896505	0.0111113	0.172	0.103	1	0
ENSMUSG00000049336	Tenm2	0.000428338	0.000427097	-0.182406	0.0301491	0.937	0.968333	0.900431	0.172458
ENSMUSG00000036023	Parp2	0.000435823	0.000480155	0.0829222	0.00910296	0.124	0.0653333	0.981556	0.0319458
ENSMUSG00000031605	Klhl2	0.000438699	0.000554516	-0.193458	0.0313534	0.635	0.695333	0.68734	0.541543
ENSMUSG00000041670	Rims1	0.00044689	0.000665674	-0.141467	0.0211204	0.951	0.961333	0.702809	0.51475	SFARI;EAGLE		Moderate	11.35	Discordant	1	0
ENSMUSG00000025221	Kcnip2	0.000448251	0.000337285	0.13495	0.0108876	0.644	0.543667	1	0
ENSMUSG00000055692	Tmem191c	0.000453162	0.000595097	0.151291	0.0119234	0.434	0.344333	1	0
ENSMUSG00000023092	Fhl1	0.00045576	0.000471022	0.1422	0.0146501	0.235	0.158	0.766615	0.404235
ENSMUSG00000034685	Fam171a2	0.000472628	0.000610197	0.0961956	0.00974495	0.153	0.0893333	1	0
ENSMUSG00000066392	Nrxn3	0.000475448	0.000368513	-0.0911239	0.0123215	1	1	1	0	SFARI;EAGLE		Moderate	11.1	Discordant	1	0
ENSMUSG00000040265	Dnm3	0.000494467	0.00034409	-0.140412	0.0186905	0.707	0.771	1	0
ENSMUSG00000039488	Cntn5	0.000496769	0.00048159	-0.244316	0.0484989	0.954	0.954667	0.669989	0.571596	SFARI					2	0
ENSMUSG00000061207	Stk19	0.000501594	0.000424442	0.119568	0.0104064	0.29	0.208	1	0
ENSMUSG00000006576	Slc4a3	0.000508045	0.000474083	0.169604	0.026316	0.462	0.376333	0.691935	0.533584
ENSMUSG00000030525	Chrna7	0.000509594	0.000247355	-0.12066	0.0097404	0.238	0.325333	1	0	SFARI					2	0
ENSMUSG00000030894	Tpp1	0.000511968	0.000810173	0.116943	0.0169901	0.193	0.118667	0.758469	0.418345
ENSMUSG00000031918	Mtmr2	0.000513008	0.000379531	-0.0974012	0.00546065	0.103	0.167667	1	0
ENSMUSG00000024085	Man2a1	0.000520839	0.00082889	-0.17405	0.0291039	0.484	0.575	0.759306	0.416894
ENSMUSG00000032855	Pkd1	0.000545217	0.000807272	0.160342	0.0285957	0.565	0.479	0.742542	0.445931
ENSMUSG00000026109	Tmeff2	0.000549974	0.000867156	-0.249315	0.0109709	0.643	0.719667	1	0
ENSMUSG00000024955	Esrra	0.000552157	0.000715488	0.0881556	0.00669032	0.154	0.09	1	0
ENSMUSG00000028648	Ndufs5	0.000555241	0.000760749	0.0994331	0.0106311	0.157	0.0916667	0.947534	0.0908746
ENSMUSG00000052406	Rexo4	0.000555922	0.000134	0.116454	0.00313726	0.224	0.151333	1	0
ENSMUSG00000004383	Large1	0.000567036	0.0004658	-0.138504	0.0142427	0.874	0.915333	1	0
ENSMUSG00000031442	Mcf2l	0.00057323	0.000858807	0.166562	0.0232183	0.607	0.533	0.765408	0.406325
ENSMUSG00000057719	Sh3rf2	0.000585492	0.000451582	-0.164843	0.0127289	0.404	0.476333	1	0
ENSMUSG00000106194	Gm43569	0.000596081	0.00085372	0.0960514	0.0102846	0.141	0.0786667	0.918172	0.14173
ENSMUSG00000038930	Rccd1	0.000600117	0.000962926	0.0929037	0.013806	0.115	0.0576667	0.989783	0.0176964
ENSMUSG00000046330	Rpl37a	0.000604778	0.000850289	0.119439	0.0146871	0.185	0.116	0.995143	0.00841286
ENSMUSG00000037126	Psd	0.00061147	0.00101114	0.136169	0.021565	0.265	0.181	0.852974	0.254656
ENSMUSG00000004207	Psap	0.000614676	0.000490154	0.134001	0.0152575	0.449	0.359	1	0
ENSMUSG00000029223	Uchl1	0.000616819	0.00100369	0.147424	0.0359373	0.396	0.298	0.696208	0.526184
ENSMUSG00000026864	Hspa5	0.000661137	0.000646303	0.137975	0.0229526	0.322	0.236333	1	0
ENSMUSG00000027674	Pex5l	0.00066616	0.000907033	-0.204554	0.026931	0.282	0.358333	0.724452	0.477263
ENSMUSG00000024045	Akap8	0.000671203	0.00103924	0.109289	0.0234438	0.346	0.252	0.996691	0.00573207
ENSMUSG00000110710	C78859	0.000674149	0.00089071	0.161237	0.0150613	0.75	0.703	1	0
ENSMUSG00000008348	Ubc	0.000701281	0.000608481	0.13601	0.0214943	0.262	0.181	0.723839	0.478324
ENSMUSG00000074505	Fat3	0.000701453	0.000329626	-0.144868	0.0011249	0.916	0.931	1	0
ENSMUSG00000063568	Jazf1	0.000702116	0.00114878	-0.167081	0.0208235	0.526	0.617333	0.759389	0.416751
ENSMUSG00000026836	Acvr1	0.000717896	0.00110565	-0.147722	0.017626	0.325	0.416	1	0
ENSMUSG00000028351	Brinp1	0.000725245	0.000978671	-0.197526	0.0226884	0.797	0.840667	1	0
ENSMUSG00000037428	Vgf	0.000735361	0.00106327	0.129172	0.0215655	0.241	0.163667	0.839598	0.277824
ENSMUSG00000016346	Kcnq2	0.000736003	0.000553917	0.127502	0.0151494	0.503	0.412667	1	0	SFARI					2	0
ENSMUSG00000089917	Uckl1	0.000738351	0.00127509	0.12191	0.0228728	0.203	0.119667	0.374981	0.542999
ENSMUSG00000003974	Grm3	0.000741286	0.000727797	-0.202254	0.0215458	0.785	0.826333	0.816316	0.31815
ENSMUSG00000041841	Rpl37	0.000742449	0.00125777	0.111149	0.0225295	0.203	0.123	0.645007	0.495957
ENSMUSG00000031832	Taf1c	0.000752128	0.00121682	0.0745046	0.012976	0.11	0.0543333	0.982506	0.0303004	SFARI					2	0
ENSMUSG00000030246	Ldhb	0.000752571	0.00122822	0.130333	0.0177122	0.368	0.272667	1	0
ENSMUSG00000057329	Bcl2	0.000767884	0.000965415	-0.197911	0.0274624	0.388	0.468667	1	0
ENSMUSG00000020888	Dvl2	0.0007696	0.00043836	0.098407	0.00377176	0.181	0.116333	1	0
ENSMUSG00000044349	Snhg11	0.000776139	0.000859462	0.115907	0.0221169	0.994	0.992667	0.805162	0.337469
ENSMUSG00000061028	Clasrp	0.000784734	0.000676536	0.107318	0.021005	0.232	0.153	0.711096	0.500397
ENSMUSG00000044667	Plppr4	0.000790061	0.00119066	0.164055	0.0357881	0.804	0.755	0.715052	0.493544
ENSMUSG00000026576	Atp1b1	0.000798522	0.000562878	0.144732	0.0103018	0.735	0.672	1	0
ENSMUSG00000017167	Cntnap1	0.000798537	0.000560832	0.105102	0.0028378	0.193	0.126667	1	0
ENSMUSG00000022415	Syngr1	0.000804181	0.00087583	0.0913502	0.00652437	0.179	0.113333	1	0
ENSMUSG00000038976	Ppp1r9b	0.000804567	0.000615013	0.0717996	0.00812531	0.134	0.0763333	1	0	SFARI;EAGLE		Limited	1.5	Discordant	1	0
ENSMUSG00000034730	Adgrb1	0.000823742	0.00073591	0.164227	0.0114868	0.604	0.531	1	0
ENSMUSG00000024642	Tle4	0.000838633	0.000725093	-0.213455	0.0261599	0.785	0.834333	0.975591	0.0422768
ENSMUSG00000006998	Psmd2	0.000840052	0.00116542	0.107545	0.0236696	0.174	0.103333	0.679982	0.554287
ENSMUSG00000071528	Atp5md	0.000864436	0.000735553	0.132879	0.00889247	0.235	0.164333	1	0
ENSMUSG00000037805	Rpl10a	0.000905405	0.000750617	0.0919767	0.0057604	0.179	0.114667	1	0
ENSMUSG00000018171	Vmp1	0.000962479	0.000649509	-0.176771	0.0050666	0.437	0.504	1	0
ENSMUSG00000052516	Robo2	0.000965511	0.00130249	-0.145316	0.0274581	0.981	0.984	0.709701	0.502813	SFARI					2	0
ENSMUSG00000048154	Kmt2d	0.00103383	0.000982936	0.111322	0.00938648	0.221	0.15	1	0
ENSMUSG00000024431	Nr3c1	0.00105131	0.00180815	-0.169356	0.0417657	0.293	0.391	0.47425	0.484514
ENSMUSG00000006057	Atp5g1	0.00106286	0.000898134	0.113146	0.00309069	0.235	0.165	1	0
ENSMUSG00000020850	Prpf8	0.00107279	0.00141193	0.0845335	0.00806042	0.197	0.127	1	0	SFARI					3	0
ENSMUSG00000040938	Slc16a11	0.00108066	0.00174508	0.109081	0.0169802	0.181	0.112	1	0
ENSMUSG00000022843	Clcn2	0.00112203	0.00154761	0.110756	0.0136013	0.278	0.198667	1	0
ENSMUSG00000019146	Cacng2	0.00112528	0.000919857	-0.129037	0.00996048	0.232	0.306	1	0
ENSMUSG00000040867	Begain	0.00116861	0.00140127	0.102027	0.00961712	0.201	0.133333	1	0
ENSMUSG00000013033	Adgrl1	0.00117316	0.00138656	0.16385	0.0087457	0.504	0.432	1	0	SFARI						1
ENSMUSG00000030428	Ttyh1	0.00117569	0.000687619	0.138116	0.0113782	0.537	0.457667	1	0
ENSMUSG00000040687	Madd	0.00117734	0.000973049	0.108224	0.00372264	0.34	0.257	1	0
ENSMUSG00000059409	Ppp2r5d	0.00119099	0.000751281	0.0928861	0.00362032	0.225	0.155	1	0	SFARI;EAGLE;TADA	0.00157884	Moderate	8.5	Discordant	1	1
ENSMUSG00000044340	Phlpp1	0.00121356	0.000914007	-0.195609	0.0280464	0.432	0.505	1	0
ENSMUSG00000060671	Atp8b2	0.00122253	0.00112106	0.101958	0.0102521	0.232	0.161333	1	0
ENSMUSG00000046709	Mapk10	0.00122452	0.000538417	-0.171488	0.00461981	0.806	0.830667	1	0
ENSMUSG00000042348	Arl15	0.00122809	0.00167771	-0.141959	0.00762438	0.843	0.879	1	0
ENSMUSG00000022131	Gpr180	0.00127072	0.000874364	0.104044	0.00484175	0.21	0.144333	1	0
ENSMUSG00000017969	Ptgis	0.0012892	0.00111199	0.101143	0.022997	0.191	0.120333	0.740222	0.449949
ENSMUSG00000022208	Jph4	0.00129099	0.00193899	0.180819	0.0154579	0.484	0.408333	1	0
ENSMUSG00000023944	Hsp90ab1	0.00129885	0.00149433	0.144069	0.0213482	0.621	0.539667	1	0
ENSMUSG00000039059	Hrh3	0.00130483	0.00156033	0.1295	0.0126039	0.172	0.110667	1	0
ENSMUSG00000107563	4930587E11Rik	0.00132367	0.00104745	0.116698	0.0102265	0.203	0.135667	1	0
ENSMUSG00000061576	Dpp6	0.00133114	0.0021263	-0.156346	0.0177604	0.957	0.960333	1	0	SFARI					2	0
ENSMUSG00000063524	Eno1	0.00135739	0.000412368	0.0904386	0.00871599	0.203	0.137667	1	0
ENSMUSG00000021134	Srsf5	0.0013655	0.000926344	0.136079	0.0156947	0.687	0.624667	1	0
ENSMUSG00000024560	Cxxc1	0.00137549	0.00200916	0.0779951	0.0108464	0.131	0.074	1	0
ENSMUSG00000012405	Rpl15	0.00137867	0.000259493	0.0678169	0.00462104	0.101	0.0546667	1	0
ENSMUSG00000001248	Gramd1a	0.0013986	0.00135151	0.0849346	0.00620969	0.151	0.0933333	1	0
ENSMUSG00000021478	Drd1	0.00142052	0.00168877	0.152032	0.0217957	0.609	0.533333	1	0	SFARI					2	0
ENSMUSG00000061518	Cox5b	0.00145338	0.0011316	0.106765	0.00913176	0.243	0.172	1	0
ENSMUSG00000032330	Cox7a2	0.00147244	0.00021476	0.114497	0.0054995	0.206	0.143	1	0
ENSMUSG00000027827	Kcnab1	0.00149894	0.00150674	-0.147751	0.0362526	0.984	0.986	0.672216	0.567739
ENSMUSG00000022551	Cyc1	0.00149918	0.00107983	0.0859511	0.0131843	0.175	0.113333	1	0
ENSMUSG00000005566	Trim28	0.00151662	0.000758731	0.0696284	0.00231052	0.106	0.0583333	1	0
ENSMUSG00000057649	Brd9	0.00152416	0.00169559	0.115029	0.0136247	0.351	0.267	1	0
ENSMUSG00000032238	Rora	0.00152801	0.0020717	-0.14152	0.0158267	0.987	0.996	0.991341	0.0149975	SFARI						1
ENSMUSG00000041957	Pkp2	0.00154421	0.00160478	0.102406	0.0163486	0.156	0.0943333	0.837934	0.280706
ENSMUSG00000002102	Psmc3	0.00154967	0.00175281	0.0848183	0.0094175	0.16	0.0996667	1	0
ENSMUSG00000038418	Egr1	0.00155212	0.00250865	0.120904	0.0213981	0.259	0.178333	1	0
ENSMUSG00000029034	Ints11	0.0015812	0.00155736	0.0748328	0.0045829	0.115	0.0646667	1	0
ENSMUSG00000039202	Abhd2	0.0015936	0.00108637	0.11917	0.00778859	0.404	0.322667	1	0
ENSMUSG00000035674	Ndufa3	0.00161245	0.00198186	0.0945457	0.0116286	0.154	0.0953333	1	0
ENSMUSG00000024500	Ppp2r2b	0.00161331	0.00100918	-0.143455	0.0171866	0.904	0.925667	1	0
ENSMUSG00000033342	Plppr5	0.00168751	0.00223933	-0.142366	0.021306	0.4	0.484667	1	0
ENSMUSG00000064138	Fam172a	0.00175932	0.00163148	-0.130409	0.0226535	0.621	0.679	1	0
ENSMUSG00000017999	Ddx27	0.0017612	0.0010237	0.0834529	0.00568562	0.126	0.0753333	1	0
ENSMUSG00000020189	Osbpl8	0.00178256	0.0026442	-0.159322	0.0378209	0.943	0.955667	1	0
ENSMUSG00000106515	Gm30382	0.00182781	0.000603174	-0.13574	0.00884017	0.235	0.303	1	0
ENSMUSG00000040415	Dtx3	0.00186457	0.00173095	0.131672	0.0139972	0.437	0.360667	1	0
ENSMUSG00000068373	D430041D05Rik	0.0018776	0.00283653	-0.163556	0.0432302	0.771	0.836	0.727712	0.471617
ENSMUSG00000084786	Ubl5	0.00188407	0.00203956	0.0827861	0.00399834	0.157	0.0996667	1	0
ENSMUSG00000047547	Cltb	0.00189938	0.00297332	0.0965362	0.0166835	0.207	0.136	1	0
ENSMUSG00000093674	Rpl41	0.00192296	0.00212067	0.144577	0.0133948	0.385	0.309	1	0
ENSMUSG00000039953	Clstn1	0.00193615	0.00147766	0.137141	0.00592249	0.497	0.423	1	0
ENSMUSG00000079055	Slc8a3	0.00194121	0.00304997	-0.157707	0.0260232	0.444	0.532667	1	0
ENSMUSG00000020451	Limk2	0.00194882	0.00197634	0.0976986	0.00747664	0.199	0.133333	1	0
ENSMUSG00000078816	Prkcg	0.00199486	0.00102554	0.0975155	0.00640491	0.328	0.25	1	0
ENSMUSG00000032637	Atxn2l	0.00201951	0.00156609	0.122637	0.0135647	0.3	0.227	1	0
ENSMUSG00000036622	Atp13a2	0.00207391	0.0014575	0.0824703	0.00594121	0.14	0.0863333	1	0
ENSMUSG00000036478	Btg1	0.00208431	0.00199566	0.0844151	0.00594923	0.137	0.0826667	1	0
ENSMUSG00000059439	Bcas3	0.00216672	0.00340388	-0.139331	0.0277665	0.615	0.699333	1	0
ENSMUSG00000025790	Slco3a1	0.0021798	0.00149764	-0.0929755	0.0108647	0.203	0.275	1	0
ENSMUSG00000090071	Cdk5r2	0.00220031	0.000456704	0.0662986	0.00199543	0.107	0.0613333	1	0
ENSMUSG00000030747	Dgat2	0.00226216	0.00143192	0.112033	0.00839406	0.243	0.176667	1	0
ENSMUSG00000024524	Gnal	0.00228778	0.00221634	-0.118961	0.00640624	0.897	0.91	1	0
ENSMUSG00000026860	Sh3glb2	0.00233544	0.000615386	0.0923144	0.00438715	0.259	0.19	1	0
ENSMUSG00000040133	Gpr176	0.00233694	0.00242335	-0.0943765	0.0204608	0.135	0.199333	1	0
ENSMUSG00000019978	Epb41l2	0.00240003	0.00224762	-0.116758	0.00791505	0.121	0.178333	1	0
ENSMUSG00000002957	Ap2a2	0.00240494	0.00248753	0.113608	0.0149767	0.318	0.242333	1	0
ENSMUSG00000038020	Rapgefl1	0.00245624	0.00305736	0.0681583	0.0108786	0.118	0.0673333	1	0
ENSMUSG00000022756	Slc7a4	0.0024609	0.00346262	0.0751157	0.00784213	0.138	0.0826667	1	0
ENSMUSG00000052942	Glis3	0.00248544	0.00415516	0.0986971	0.0203496	0.104	0.052	0.720233	0.48457
ENSMUSG00000023826	Prkn	0.00250251	0.00197397	-0.132732	0.0175586	0.85	0.874667	1	0	SFARI					2	0
ENSMUSG00000025332	Kdm5c	0.00250662	0.00224846	0.100143	0.0171862	0.334	0.252667	1	0	SFARI					1	0
ENSMUSG00000010277	2610507B11Rik	0.00250725	0.00337328	0.120201	0.0227417	0.354	0.276667	1	0
ENSMUSG00000026202	Tuba4a	0.00253013	0.00301588	0.107399	0.0207406	0.225	0.158	1	0
ENSMUSG00000052387	Trpm3	0.0025502	0.00238901	0.236667	0.0710947	0.599	0.524333	1	0
ENSMUSG00000041112	Elmo1	0.00264885	0.00401865	-0.14796	0.0339157	0.804	0.853667	1	0
ENSMUSG00000028849	Map7d1	0.00265262	0.00292775	0.101422	0.0205775	0.232	0.160333	1	0
ENSMUSG00000007670	Khsrp	0.00272646	0.000987893	0.102446	0.00210073	0.215	0.153333	1	0
ENSMUSG00000072769	Gm10419	0.00276052	0.00387397	0.165081	0.0422706	0.499	0.418667	0.713245	0.496674
ENSMUSG00000018451	6330403K07Rik	0.00278382	0.00296134	0.0994233	0.00662059	0.196	0.133333	1	0
ENSMUSG00000059796	Eif4a1	0.00279333	0.0043782	0.111462	0.0155331	0.3	0.22	1	0
ENSMUSG00000060961	Slc4a4	0.00279861	0.00465314	-0.143801	0.0323334	0.928	0.941667	0.932949	0.116136
ENSMUSG00000041936	Agrn	0.0028111	0.00305746	0.105583	0.0144919	0.346	0.267333	1	0
ENSMUSG00000031833	Mast3	0.00281644	0.00261081	0.146403	0.0106449	0.468	0.390667	1	0	SFARI					3	0
ENSMUSG00000042625	Safb2	0.00281875	0.00230322	0.109089	0.00940988	0.282	0.215333	1	0
ENSMUSG00000032968	Inha	0.00282508	0.00208503	0.0802383	0.00834938	0.149	0.0953333	1	0
ENSMUSG00000054469	Lclat1	0.00286877	0.00312666	-0.117513	0.010803	0.228	0.300667	1	0
ENSMUSG00000037174	Elf2	0.00289551	0.0028509	-0.0743881	0.0099004	0.1	0.156667	1	0
ENSMUSG00000038274	Fau	0.00289628	0.0019318	0.0972738	0.00824062	0.218	0.155	1	0
ENSMUSG00000016477	E2f3	0.002979	0.00415229	-0.103286	0.0228619	0.141	0.209	1	0
ENSMUSG00000031748	Gnao1	0.0029957	0.0048815	-0.180836	0.0201626	0.628	0.694	1	0
ENSMUSG00000000088	Cox5a	0.00299914	0.00254136	0.122071	0.00507863	0.304	0.235	1	0
ENSMUSG00000035189	Ano4	0.00305891	0.00285896	-0.12592	0.0208595	0.134	0.192667	1	0
ENSMUSG00000013593	Ndufs2	0.00307005	0.00370034	0.0979512	0.0135533	0.179	0.119	1	0
ENSMUSG00000038296	Galnt18	0.00307503	0.00450608	-0.179532	0.0245429	0.679	0.706	1	0
ENSMUSG00000073422	H2-Ke6	0.00307679	0.0025905	0.0725935	0.00985276	0.11	0.0626667	1	0
ENSMUSG00000019806	Aig1	0.00311441	0.00387184	-0.120487	0.0235965	0.401	0.487333	1	0
ENSMUSG00000020902	Ntn1	0.00313859	0.00487255	0.0840321	0.0114103	0.106	0.057	1	0
ENSMUSG00000025402	Nab2	0.0031714	0.00396286	0.0802904	0.0122934	0.174	0.113	1	0
ENSMUSG00000070000	Fcho1	0.00321104	0.00323994	0.099672	0.00923907	0.257	0.189333	1	0
ENSMUSG00000026614	Slc30a10	0.00330684	0.00346065	0.0656421	0.00640415	0.109	0.063	1	0
ENSMUSG00000025212	Sfxn3	0.00333412	0.000342923	0.103605	0.00704313	0.259	0.192	1	0
ENSMUSG00000092341	Malat1	0.00336697	0.00573292	-0.0742133	0.0169821	1	1	0.815634	0.319332
ENSMUSG00000025006	Sorbs1	0.00340862	0.00398155	-0.146248	0.0221734	0.866	0.889	1	0
ENSMUSG00000058756	Thra	0.00341159	0.00416766	0.116264	0.016381	0.415	0.338333	1	0	SFARI					2	0
ENSMUSG00000022540	Rogdi	0.00344797	0.00289189	0.081323	0.00786425	0.169	0.112333	1	0
ENSMUSG00000059974	Ntm	0.00346721	0.00518411	-0.167037	0.0320558	0.876	0.896	1	0
ENSMUSG00000025409	Mbd6	0.00351777	0.00342952	0.0737977	0.00967999	0.149	0.0943333	1	0	SFARI;TADA	0.044489				2	0
ENSMUSG00000034201	Gas2l1	0.00355399	0.00189097	0.0863374	0.00866526	0.171	0.115333	1	0
ENSMUSG00000086859	Snhg20	0.00356006	0.00279428	0.100013	0.00971774	0.284	0.213333	1	0
ENSMUSG00000036699	Zcchc12	0.00356955	0.00529796	0.0706081	0.0118639	0.131	0.0783333	1	0
ENSMUSG00000062006	Rpl34	0.00358559	0.00349833	0.0829265	0.0136463	0.162	0.106667	1	0	EAGLE		No scorable evidence	0	Concordant
ENSMUSG00000035299	Mid1	0.00358629	0.00609823	0.0778087	0.0152074	0.104	0.0536667	0.999527	0.000820108
ENSMUSG00000085334	Gm12940	0.003609	0.00297669	0.0908511	0.0127468	0.287	0.213333	1	0
ENSMUSG00000028152	Tspan5	0.00362315	0.0022573	-0.150314	0.00977356	0.629	0.678333	1	0
ENSMUSG00000029430	Ran	0.00366957	0.00287378	0.0767257	0.0075304	0.113	0.0666667	1	0
ENSMUSG00000006575	Rundc3a	0.00368218	0.00439981	0.0826203	0.0156031	0.206	0.139667	1	0
ENSMUSG00000101609	Kcnq1ot1	0.00373301	0.00306563	-0.132975	0.0216326	0.471	0.542	1	0
ENSMUSG00000018293	Pfn1	0.00374004	0.00520209	0.0597377	0.0076001	0.1	0.0546667	1	0
ENSMUSG00000052298	Cdc42se2	0.00380989	0.00331568	0.120275	0.0135295	0.363	0.291333	1	0
ENSMUSG00000071341	Egr4	0.00382723	0.00380776	0.102128	0.00782797	0.124	0.0756667	1	0
ENSMUSG00000032482	Cspg5	0.00382936	0.00473226	0.104966	0.0111978	0.199	0.138667	1	0
ENSMUSG00000038034	Igsf8	0.00384619	0.0031123	0.110915	0.00719138	0.262	0.197333	1	0
ENSMUSG00000042082	Arsb	0.00386643	0.0042197	-0.122273	0.022453	0.294	0.376333	0.844154	0.269934
ENSMUSG00000028843	Sh3bgrl3	0.00391997	0.00647517	0.0956027	0.0252858	0.168	0.102333	0.707045	0.507414
ENSMUSG00000043991	Pura	0.00397115	0.00423656	-0.108103	0.00467579	0.278	0.351667	1	0
ENSMUSG00000042750	Bex2	0.00401299	0.00621701	0.106297	0.0184151	0.216	0.149	1	0
ENSMUSG00000003273	Car11	0.0040411	0.00390434	0.133426	0.0417704	0.503	0.423	0.701955	0.516229
ENSMUSG00000005871	Apc	0.00411365	0.00506914	-0.124291	0.00707464	0.616	0.672667	1	0
ENSMUSG00000031144	Syp	0.00412207	0.00277234	0.088876	0.011364	0.179	0.123	1	0	SFARI					3	0
ENSMUSG00000004187	Kifc2	0.00412618	0.00112821	0.0957199	0.00450226	0.231	0.17	1	0
ENSMUSG00000062296	Trank1	0.0041363	0.00336596	0.128275	0.0230993	0.919	0.905333	1	0
ENSMUSG00000103971	Gm37679	0.00416463	0.00331614	0.0725736	0.00559432	0.199	0.137333	1	0
ENSMUSG00000022707	Gbe1	0.00420446	0.00147654	-0.121086	0.0135636	0.125	0.179	1	0	SFARI					2	0
ENSMUSG00000049517	Rps23	0.00420482	0.0068975	0.0978498	0.0166108	0.184	0.120333	1	0
ENSMUSG00000048076	Arf1	0.0042351	0.00142011	0.0986826	0.00382145	0.204	0.146667	1	0
ENSMUSG00000031622	Sin3b	0.00425007	0.00119356	0.0794586	0.00222711	0.144	0.095	1	0	SFARI					2	1
ENSMUSG00000001119	Col6a1	0.00432525	0.00570831	0.120662	0.0273306	0.307	0.231	1	0
ENSMUSG00000033295	Ptprf	0.00441084	0.00155059	0.0829769	0.00528853	0.199	0.140333	1	0
ENSMUSG00000000804	Usp32	0.00444274	0.00199973	-0.105542	0.010542	0.568	0.632333	1	0
ENSMUSG00000025369	Smarcc2	0.0044558	0.00251711	0.103922	0.00657872	0.204	0.148	1	0	SFARI;EAGLE;TADA	7.86e-05	Moderate	10	Discordant	1	1
ENSMUSG00000021279	Cdc42bpb	0.00447387	0.00501166	0.097182	0.0193571	0.254	0.187	1	0	SFARI					2	0
ENSMUSG00000040459	Arglu1	0.00447761	0.00692605	0.133412	0.0244726	0.897	0.859667	1	0
ENSMUSG00000052488	Cherp	0.00448766	0.00755283	0.101753	0.0220811	0.196	0.128333	1	0
ENSMUSG00000032402	Smad3	0.00450319	0.00655042	-0.118007	0.0161807	0.26	0.332333	1	0
ENSMUSG00000025428	Atp5a1	0.00452186	0.00177871	0.117525	0.00531498	0.415	0.34	1	0
ENSMUSG00000022770	Dlg1	0.00461158	0.00415876	-0.128252	0.00183825	0.829	0.865667	1	0	SFARI					2	0
ENSMUSG00000025537	Phkg1	0.00472653	0.00757471	0.0949234	0.0173989	0.116	0.066	1	0
ENSMUSG00000031302	Nlgn3	0.00479984	0.00775929	0.0697497	0.0110271	0.103	0.055	1	0	SFARI;EAGLE		Moderate	6.5	Discordant	1	0
ENSMUSG00000026987	Baz2b	0.00480183	0.00659802	-0.123372	0.016331	0.49	0.568667	1	0	SFARI;EAGLE		Moderate	7.35	Discordant	1	0
ENSMUSG00000053046	Brsk2	0.00485264	0.00614721	0.0882467	0.0141289	0.175	0.116667	1	0	SFARI;EAGLE;TADA	1.24e-06	Moderate	7.7	Discordant	1	1
ENSMUSG00000017740	Slc12a5	0.00495638	0.00421	0.106967	0.0225832	0.481	0.406	1	0	SFARI					2	0
ENSMUSG00000023832	Acat2	0.00496602	0.00290027	0.0585039	0.00596981	0.106	0.063	1	0
ENSMUSG00000009741	Ubp1	0.00500904	0.00741621	0.128754	0.0230631	0.416	0.349667	1	0
ENSMUSG00000055214	Pld5	0.00501122	0.00727436	-0.158871	0.049713	0.396	0.473	1	0
ENSMUSG00000022019	Tdrd3	0.00504251	0.00245755	-0.107812	0.0113786	0.244	0.308667	1	0
ENSMUSG00000004151	Etv1	0.00505998	0.00329319	-0.139335	0.0171126	0.197	0.257333	1	0
ENSMUSG00000003363	Pld3	0.00508395	0.00484261	0.0911763	0.0128891	0.416	0.337333	1	0
ENSMUSG00000039686	Zer1	0.00509116	0.00535996	0.0957755	0.01805	0.344	0.268667	1	0
ENSMUSG00000036529	Sbf1	0.00511189	0.00391508	0.103084	0.00648173	0.268	0.203	1	0	SFARI					2	0
ENSMUSG00000035521	Gnptg	0.00511797	0.00664927	0.11447	0.0229839	0.369	0.296333	1	0
ENSMUSG00000031353	Rbbp7	0.00516265	0.0036405	0.0928924	0.00469705	0.229	0.168	1	0
ENSMUSG00000040327	Cul9	0.0052011	0.00179059	0.0962776	0.00583839	0.284	0.22	1	0
ENSMUSG00000020173	Cobl	0.00520327	0.00471702	-0.161486	0.0204083	0.615	0.649	1	0
ENSMUSG00000028782	Adgrb2	0.00522257	0.00537245	0.0970724	0.0345343	0.331	0.249667	0.751503	0.43041
ENSMUSG00000034156	Tspoap1	0.00528482	0.00528553	0.124031	0.0175948	0.568	0.497	1	0	SFARI					2	0
ENSMUSG00000029475	Kdm2b	0.00531668	0.00517302	0.0793342	0.00711498	0.165	0.111333	1	0
ENSMUSG00000069670	Nkain2	0.0053554	0.0045937	-0.0957439	0.0197245	1	1	1	0
ENSMUSG00000003072	Atp5d	0.00536563	0.00740808	0.089895	0.0194828	0.199	0.137	1	0
ENSMUSG00000059456	Ptk2b	0.00542608	0.00548989	0.131699	0.0296721	0.659	0.582667	1	0
ENSMUSG00000032507	Fbxl2	0.00544267	0.00253638	0.119304	0.00489118	0.385	0.320667	1	0
ENSMUSG00000051853	Arf3	0.0054637	0.00550009	0.098638	0.0166375	0.35	0.273	1	0	TADA	0.0920637
ENSMUSG00000030086	Chchd6	0.00552088	0.0051054	-0.104398	0.0233652	0.199	0.263667	1	0
ENSMUSG00000075706	Gpx4	0.00555701	0.00539788	0.0640107	0.00956946	0.135	0.0856667	1	0
ENSMUSG00000058152	Chsy3	0.00565564	0.00581232	-0.130349	0.035133	0.897	0.920333	1	0
ENSMUSG00000009079	Ewsr1	0.00568038	0.00382567	0.125735	0.0117499	0.69	0.635333	1	0
ENSMUSG00000021983	Atp8a2	0.00573455	0.00108963	-0.0971653	0.00932663	0.501	0.58	1	0
ENSMUSG00000040003	Magi2	0.00576912	0.00437419	-0.0857079	0.00899451	0.988	0.996667	1	0
ENSMUSG00000066189	Cacng3	0.00577463	0.00688314	-0.136861	0.0297128	0.601	0.658	1	0
ENSMUSG00000019795	Pcmt1	0.00577565	0.00462696	0.102573	0.00886861	0.401	0.332333	1	0
ENSMUSG00000001105	Ift20	0.00583697	0.0055762	0.0734615	0.0155254	0.113	0.0653333	1	0
ENSMUSG00000025571	Tnrc6c	0.00585148	0.00584822	-0.140805	0.0225078	0.737	0.772	1	0	SFARI					2	0
ENSMUSG00000060073	Psma3	0.00587754	0.00472166	0.11754	0.0132875	0.435	0.37	1	0
ENSMUSG00000029446	Psph	0.00589609	0.00613931	0.069366	0.00682742	0.118	0.0726667	1	0
ENSMUSG00000031754	Nudt21	0.00590513	0.00734678	-0.072758	0.00931133	0.068	0.112667	1	0
ENSMUSG00000031729	Ist1	0.00592023	0.00900628	0.12387	0.0201772	0.259	0.192333	1	0
ENSMUSG00000030411	Nova2	0.00592529	0.00454043	0.0839144	0.00754196	0.269	0.203333	1	0	SFARI						1
ENSMUSG00000031760	Mt3	0.00593912	0.00391338	0.0804159	0.00223909	0.132	0.0856667	1	0
ENSMUSG00000038766	Gabpb2	0.00607047	0.00208203	0.0705709	0.00530199	0.191	0.135333	1	0
ENSMUSG00000022255	Mtdh	0.00611437	0.00265913	-0.111141	0.00609613	0.496	0.575333	1	0
ENSMUSG00000020121	Srgap1	0.00613752	0.0104612	-0.173363	0.050644	0.669	0.742667	0.932408	0.117073
ENSMUSG00000020238	Ncln	0.00613843	0.00410102	0.0665245	0.0069652	0.109	0.0663333	1	0
ENSMUSG00000067925	Rtl8a	0.0061497	0.0041858	0.0690576	0.00973197	0.159	0.106667	1	0
ENSMUSG00000038187	Btbd10	0.0061615	0.00800223	-0.116795	0.015352	0.382	0.456333	1	0
ENSMUSG00000058301	Upf1	0.00620839	0.00908329	0.0795949	0.0200078	0.165	0.105667	1	0
ENSMUSG00000031503	Col4a2	0.00624444	0.0025308	0.0895542	0.009182	0.197	0.142	1	0
ENSMUSG00000098097	6530403H02Rik	0.00625241	0.0053254	-0.15404	0.0287467	0.725	0.752	1	0
ENSMUSG00000027016	Zfp385b	0.00626466	0.0104737	-0.153552	0.0469911	0.959	0.972333	0.69351	0.530857	SFARI					2	0
ENSMUSG00000020935	Dcakd	0.00632789	0.00649835	-0.0573662	0.0107686	0.063	0.107333	1	0
ENSMUSG00000036561	Ppp6r2	0.00632999	0.00636344	0.112567	0.0314942	0.494	0.407333	1	0
ENSMUSG00000097156	Gm3764	0.00644082	0.0013935	-0.0966823	0.00830122	0.153	0.208	1	0
ENSMUSG00000034751	Mast4	0.00646679	0.00359398	-0.152589	0.0232104	0.121	0.171667	1	0
ENSMUSG00000022234	Cct5	0.00650905	0.00908744	0.0704483	0.0159892	0.134	0.0823333	1	0
ENSMUSG00000030905	Crym	0.00655378	0.00956684	0.0938011	0.0229059	0.193	0.131333	1	0
ENSMUSG00000022553	Maf1	0.00659431	0.0107574	0.0778081	0.0189946	0.121	0.068	0.820896	0.310218
ENSMUSG00000020163	Uqcr11	0.00663367	0.0068165	0.0722752	0.0165384	0.147	0.0946667	1	0
ENSMUSG00000047085	Lrrc4b	0.00671564	0.0108862	0.0782276	0.0236009	0.209	0.143667	1	0
ENSMUSG00000059003	Grin2a	0.00674368	0.0104899	-0.158444	0.029762	0.907	0.925	1	0	SFARI;EAGLE		Limited	3.6	Discordant	1	0
ENSMUSG00000020454	Eif4enif1	0.00677958	0.0105815	-0.0809842	0.0190862	0.115	0.173667	1	0
ENSMUSG00000062991	Nrg1	0.00679924	0.00789198	-0.0730138	0.018891	1	0.997	1	0
ENSMUSG00000037196	Pacrg	0.00680836	0.0106854	-0.106208	0.0280807	0.125	0.184333	1	0
ENSMUSG00000035640	Cbarp	0.00683802	0.00268709	0.0789355	0.00466262	0.231	0.172	1	0
ENSMUSG00000029714	Gigyf1	0.0068733	0.00584389	0.0895961	0.0151379	0.224	0.161	1	0	SFARI;EAGLE;TADA	4.94e-14	Definitive	17.25	Concordant	1	0
ENSMUSG00000069495	Epc2	0.00691475	0.00710193	-0.096126	0.0129048	0.279	0.350333	1	0	SFARI					2	0
ENSMUSG00000057193	Slc44a2	0.0069742	0.00348073	0.0900288	0.00216068	0.171	0.120333	1	0
ENSMUSG00000006356	Crip2	0.00700273	0.00410404	0.071801	0.00410211	0.116	0.0736667	1	0
ENSMUSG00000056596	Trnp1	0.00702668	0.00998905	0.0820104	0.016764	0.182	0.124	1	0
ENSMUSG00000040118	Cacna2d1	0.00704865	0.00254367	-0.110735	0.00415033	0.915	0.925667	1	0	SFARI					2	0
ENSMUSG00000035632	Cnot3	0.00714998	0.00964276	0.0979563	0.0216982	0.36	0.286667	1	0	SFARI;EAGLE;TADA	0.00572418	Limited	5.6	Discordant	1	1
ENSMUSG00000019775	Rgs17	0.00719384	0.00662589	-0.079293	0.0152559	0.576	0.661667	1	0
ENSMUSG00000026341	Actr3	0.0072298	0.00606168	-0.0935255	0.0159137	0.313	0.379333	1	0
ENSMUSG00000026409	Pfkfb2	0.00727177	0.00963774	0.0813204	0.0111997	0.151	0.0996667	1	0
ENSMUSG00000084845	Tmem240	0.0072809	0.000131192	0.0589204	0.00114494	0.109	0.068	1	0
ENSMUSG00000037138	Aff3	0.0072823	0.00797781	-0.123043	0.0176928	0.847	0.880333	1	0
ENSMUSG00000112437	Gm35188	0.00739115	0.0124998	0.130866	0.0275135	0.334	0.257	1	0
ENSMUSG00000040785	Ttc3	0.00740471	0.0118555	0.113124	0.0264135	0.959	0.934	1	0
ENSMUSG00000029712	Actl6b	0.00745928	0.012482	0.0953674	0.0222397	0.294	0.216667	1	0	SFARI						1
ENSMUSG00000020198	Ap3d1	0.00748011	0.00301409	0.0712562	0.00455879	0.21	0.153333	1	0
ENSMUSG00000035203	Epn1	0.0074933	0.00843909	0.0812858	0.013822	0.207	0.148333	1	0
ENSMUSG00000022270	Retreg1	0.00755802	0.00647597	-0.0916685	0.0119569	0.194	0.258	1	0
ENSMUSG00000050556	Kcnb1	0.00758883	0.00715699	0.130348	0.015428	0.459	0.389	1	0	SFARI;TADA	0.00319791				1	1
ENSMUSG00000021420	Fars2	0.00767149	0.00149201	-0.116802	0.0128676	0.522	0.578667	1	0
ENSMUSG00000029211	Gabra4	0.00769045	0.00543607	-0.118022	0.00991822	0.804	0.827667	1	0	SFARI					2	0
ENSMUSG00000013663	Pten	0.00770959	0.000728167	-0.149579	0.00684697	0.6	0.647333	1	0	SFARI;EAGLE;TADA	0	Definitive	63.15	Concordant	1	1
ENSMUSG00000005986	Ankrd13d	0.00776452	0.00806317	0.0819709	0.0231588	0.197	0.135333	1	0
ENSMUSG00000019428	Fkbp8	0.00778769	0.0125751	0.0721233	0.0183361	0.207	0.142667	1	0
ENSMUSG00000028381	Ugcg	0.00781133	0.00707319	0.0792011	0.011571	0.185	0.130667	1	0
ENSMUSG00000043289	Mei4	0.00790916	0.0116963	-0.139918	0.0438055	0.559	0.629	1	0
ENSMUSG00000024222	Fkbp5	0.00811798	0.0116145	0.100083	0.0175418	0.225	0.164667	1	0
ENSMUSG00000026970	Rbms1	0.00816779	0.00687599	-0.132016	0.0190027	0.624	0.685	1	0
ENSMUSG00000001424	Snd1	0.00825001	0.00715073	-0.114903	0.0267533	0.444	0.511667	1	0	SFARI					2	0
ENSMUSG00000029283	Cdc7	0.00827461	0.0101288	0.0857185	0.0128389	0.138	0.0913333	1	0
ENSMUSG00000020151	Ptprr	0.00831642	0.00188383	-0.122057	0.0144595	0.254	0.314667	1	0
ENSMUSG00000032294	Pkm	0.00836427	0.0114983	0.115529	0.0150173	0.365	0.296	1	0
ENSMUSG00000038702	Dsel	0.00844382	0.0125934	-0.0979056	0.0161863	0.153	0.213667	1	0
ENSMUSG00000036751	Cox6b1	0.00846423	0.0117359	0.0887204	0.0264623	0.21	0.148333	1	0
ENSMUSG00000036095	Dgkb	0.00851976	0.0106555	-0.0920917	0.0141604	0.993	0.999	1	0
ENSMUSG00000024018	Ccdc167	0.00856759	0.00746194	0.0637947	0.00592892	0.107	0.0663333	1	0
ENSMUSG00000054871	Tmem158	0.00869165	0.00346658	0.122265	0.00347784	0.397	0.334	1	0
ENSMUSG00000018849	Wwc1	0.00872571	0.00944967	-0.0816018	0.0150689	0.238	0.306	1	0
ENSMUSG00000004849	Ap1s1	0.00886901	0.0141766	0.0845614	0.0176935	0.206	0.143	1	0
ENSMUSG00000090266	Mettl23	0.00893604	0.0056284	0.0689642	0.00853279	0.159	0.109	1	0
ENSMUSG00000025204	Ndufb8	0.00906956	0.00856138	0.0725705	0.00951509	0.162	0.111333	1	0
ENSMUSG00000023050	Map3k12	0.00909042	0.00966541	0.0788161	0.0114607	0.222	0.162667	1	0
ENSMUSG00000027933	Ints3	0.00911965	0.00174347	0.0771912	0.00450226	0.219	0.162667	1	0
ENSMUSG00000022781	Pak2	0.00918779	0.00293211	0.109317	0.00252559	0.287	0.228333	1	0	SFARI					2	0
ENSMUSG00000047766	Lrrc49	0.00920001	0.014726	-0.128731	0.0391708	0.434	0.515667	0.935403	0.111885
ENSMUSG00000006675	P4htm	0.00923782	0.00444629	0.0748637	0.0105988	0.254	0.193667	1	0
ENSMUSG00000035486	Plk5	0.00942282	0.0039926	0.0867721	0.00269549	0.225	0.169667	1	0
ENSMUSG00000019984	Med23	0.00943433	0.00717185	0.0820554	0.0168126	0.281	0.217333	1	0	SFARI					2	0
ENSMUSG00000049583	Grm5	0.00946644	0.0150519	0.0638874	0.0174719	1	1	1	0	SFARI					2	0
ENSMUSG00000046434	Hnrnpa1	0.00947592	0.0131506	0.0936573	0.0315577	0.285	0.217667	1	0
ENSMUSG00000060924	Csmd1	0.00953484	0.00712577	-0.0597964	0.00422089	1	1	1	0	SFARI					2	0
ENSMUSG00000025156	Gps1	0.00960907	0.00609504	0.0731381	0.0038472	0.14	0.0946667	1	0
ENSMUSG00000019518	Ap4m1	0.00962671	0.00666855	0.0703165	0.00867955	0.162	0.112	1	0
ENSMUSG00000030660	Pik3c2a	0.00968728	0.00674351	-0.108376	0.0233865	0.335	0.401333	1	0
ENSMUSG00000040385	Ppp1ca	0.00972269	0.0147105	0.0852499	0.013349	0.237	0.173	1	0
ENSMUSG00000033565	Rbfox2	0.00976198	0.00579858	-0.124041	0.0112836	0.799	0.82	1	0
ENSMUSG00000015377	Dennd6b	0.00979038	0.016851	0.112249	0.0301972	0.218	0.147333	0.950223	0.0862156
ENSMUSG00000061603	Akap6	0.0098552	0.0168836	-0.116281	0.0425085	0.949	0.966333	0.676506	0.560309
ENSMUSG00000020577	Tspan13	0.00987883	0.00650983	0.10777	0.00919113	0.372	0.313667	1	0
ENSMUSG00000013787	Ehmt2	0.0098855	0.0089149	0.074329	0.0100762	0.201	0.146667	1	0
ENSMUSG00000044471	Lncpint	0.00990903	0.0112539	-0.0961515	0.0178293	0.956	0.964	1	0
ENSMUSG00000005886	Ncoa2	0.00997066	0.00521511	-0.0948924	0.000593474	0.538	0.604333	1	0
ENSMUSG00000087202	Gm15813	0.00997333	0.0150706	0.102008	0.0235165	0.412	0.333	1	0
ENSMUSG00000030678	Maz	0.0101059	0.0130314	0.0713212	0.00837161	0.144	0.0956667	1	0
ENSMUSG00000005580	Adcy9	0.01014	0.0143067	0.104474	0.030733	0.757	0.711	1	0
ENSMUSG00000005779	Psmb4	0.0102244	0.00615881	0.0639607	0.00343481	0.107	0.0676667	1	0
ENSMUSG00000052446	Zfp961	0.0102806	0.0069851	-0.0539167	0.00431018	0.085	0.129667	1	0
ENSMUSG00000058317	Ube2e2	0.0102812	0.00913999	-0.139243	0.0662084	0.756	0.801	0.677246	0.559026
ENSMUSG00000024953	Prdx5	0.010317	0.0126343	0.0814488	0.0182762	0.124	0.0763333	1	0
ENSMUSG00000058297	Spock2	0.0103954	0.0105585	0.0927384	0.0173898	0.394	0.323	1	0
ENSMUSG00000030516	Tjp1	0.0104028	0.00359219	-0.104691	0.0111881	0.785	0.816	1	0
ENSMUSG00000022594	Lynx1	0.0105442	0.0126064	-0.0857504	0.0220947	0.113	0.168	1	0
ENSMUSG00000038102	Trappc11	0.0106145	0.0101049	0.0904823	0.0234327	0.25	0.188	1	0
ENSMUSG00000027620	Rbm39	0.0106295	0.00795578	0.0983834	0.0115368	0.903	0.874667	1	0
ENSMUSG00000064247	Plcxd1	0.0106298	0.00921605	0.0533505	0.00573258	0.104	0.0646667	1	0
ENSMUSG00000053929	Cyhr1	0.0107532	0.010209	0.0679127	0.0114521	0.172	0.12	1	0
ENSMUSG00000020747	Tmem94	0.0108052	0.00822784	0.0645077	0.00598966	0.124	0.0806667	1	0
ENSMUSG00000020018	Snrpf	0.0108245	0.00886332	0.0628284	0.00981201	0.11	0.0686667	1	0
ENSMUSG00000041650	Pcca	0.0110731	0.0104937	-0.117059	0.0143119	0.387	0.441	1	0	SFARI						1
ENSMUSG00000022884	Eif4a2	0.011086	0.0143872	0.120959	0.0221279	0.416	0.351333	1	0
ENSMUSG00000041078	Grid1	0.0111123	0.00448972	-0.0973565	0.00648955	0.946	0.972333	1	0	SFARI					2	0
ENSMUSG00000073073	Gm8098	0.0111327	0.00985924	-0.0998404	0.0239899	0.243	0.308333	1	0
ENSMUSG00000026737	Pip4k2a	0.0112465	0.0108411	-0.0925541	0.0259683	0.244	0.309333	1	0
ENSMUSG00000063229	Ldha	0.0112571	0.00578689	0.0691896	0.00595497	0.128	0.0856667	1	0
ENSMUSG00000037876	Jmjd1c	0.0112912	0.0124519	-0.118116	0.0286747	0.74	0.770667	1	0	SFARI					2	0
ENSMUSG00000029752	Asns	0.0112921	0.00989298	0.0635448	0.0157483	0.141	0.093	1	0
ENSMUSG00000034235	Usp54	0.0113557	0.00981413	-0.0836434	0.0247147	0.091	0.140667	1	0
ENSMUSG00000030067	Foxp1	0.0113818	0.0113907	-0.115458	0.0360452	0.987	0.974333	1	0	SFARI;EAGLE;TADA	0	Definitive	60.45	Concordant	1	1
ENSMUSG00000028792	Ak2	0.0114991	0.013535	0.0596764	0.00801461	0.104	0.0643333	1	0
ENSMUSG00000029348	Asphd2	0.0115881	0.0101074	0.0908007	0.00769546	0.237	0.181	1	0
ENSMUSG00000015291	Gdi1	0.0116012	0.0103069	0.0970893	0.0101493	0.293	0.23	1	0
ENSMUSG00000034686	Prr7	0.011616	0.0104656	0.0840929	0.0281031	0.251	0.185667	1	0
ENSMUSG00000022076	Klhl1	0.011677	0.0172106	-0.139628	0.0476293	0.347	0.414333	1	0
ENSMUSG00000032010	Usp2	0.0117332	0.00808503	0.0925714	0.01318	0.366	0.299667	1	0
ENSMUSG00000020496	Rnf187	0.0117953	0.0157346	0.0712889	0.0190142	0.156	0.106	1	0
ENSMUSG00000040269	Mrps28	0.0119013	0.00957666	-0.0734052	0.00618318	0.128	0.179	1	0
ENSMUSG00000029126	Nsg1	0.011963	0.0201437	0.141446	0.0290186	0.375	0.301333	1	0
ENSMUSG00000028149	Rap1gds1	0.0119694	0.00425848	-0.101938	0.0135879	0.556	0.616667	1	0
ENSMUSG00000024325	Ring1	0.0121482	0.0200416	0.0824275	0.026506	0.235	0.169	1	0
ENSMUSG00000042726	Trafd1	0.0122781	0.0143784	0.101101	0.00678782	0.218	0.163333	1	0
ENSMUSG00000027466	Rbck1	0.012345	0.0192091	0.0902674	0.0232254	0.209	0.148667	1	0
ENSMUSG00000015968	Cacna1d	0.0124115	0.00294935	0.111685	0.00671306	0.871	0.851667	1	0	SFARI					2	0
ENSMUSG00000031642	Sh3rf1	0.0124884	0.0059217	-0.0860004	0.00867657	0.159	0.210333	1	0	SFARI					3	0
ENSMUSG00000035242	Oaz1	0.0125794	0.0102652	0.0984272	0.00867181	0.285	0.227333	1	0
ENSMUSG00000038181	Chpf2	0.0125889	0.0118272	0.0857969	0.0118366	0.213	0.157667	1	0
ENSMUSG00000025876	Unc5a	0.0126299	0.0110532	0.0662441	0.0067173	0.134	0.0893333	1	0
ENSMUSG00000026790	Odf2	0.0126527	0.00816233	0.117724	0.00889277	0.485	0.416	1	0
ENSMUSG00000022812	Gsk3b	0.0126931	0.0139658	-0.116376	0.0199581	0.785	0.821333	1	0
ENSMUSG00000042350	Arel1	0.0127096	0.0209493	0.134342	0.0253441	0.56	0.492	1	0
ENSMUSG00000055026	Gabrg3	0.0127837	0.0162055	-0.0902722	0.0299835	0.987	0.982667	1	0	SFARI					2	0
ENSMUSG00000022641	Bbx	0.0128034	0.00686249	-0.106086	0.0162771	0.404	0.463	1	0
ENSMUSG00000086584	Gm12002	0.0128052	0.0131653	-0.0668166	0.0124923	0.096	0.141667	1	0
ENSMUSG00000087059	Gm12339	0.0128434	0.00938012	-0.080769	0.011166	0.147	0.198	1	0
ENSMUSG00000002968	Med25	0.0129146	0.0101838	0.0751253	0.0127188	0.178	0.126667	1	0
ENSMUSG00000068206	Pick1	0.0129379	0.00989506	0.0479955	0.00635153	0.106	0.0666667	1	0
ENSMUSG00000086121	Gm16068	0.0129789	0.0109398	0.0631482	0.00934947	0.109	0.069	1	0
ENSMUSG00000055839	Elob	0.0129834	0.0107551	0.0867216	0.00658192	0.2	0.149333	1	0
ENSMUSG00000021133	Susd6	0.0130112	0.00179869	-0.0791828	0.00744837	0.181	0.235	1	0
ENSMUSG00000020785	Camkk1	0.0131985	0.0149226	0.0900237	0.0148546	0.184	0.133667	1	0
ENSMUSG00000051331	Cacna1c	0.013269	0.0119238	-0.118082	0.0196185	0.935	0.958333	1	0	SFARI					1	1
ENSMUSG00000031575	Ash2l	0.0133928	0.0220354	0.0589214	0.021055	0.175	0.116	1	0
ENSMUSG00000024186	Rgs11	0.0134673	0.0203466	0.105687	0.0239316	0.335	0.266667	1	0
ENSMUSG00000052544	St6galnac3	0.0136704	0.0173402	-0.187969	0.0468554	0.451	0.505333	1	0
ENSMUSG00000038244	Mical2	0.0138717	0.0117155	-0.0878764	0.00744376	0.149	0.198667	1	0
ENSMUSG00000021071	Trim9	0.0139074	0.0165851	-0.127694	0.0350759	0.7	0.759	1	0
ENSMUSG00000006010	Odr4	0.0139137	0.00791817	0.0776216	0.00641549	0.181	0.132667	1	0
ENSMUSG00000072964	Bhlhb9	0.0140392	0.0211627	0.0911692	0.0242212	0.378	0.303	1	0
ENSMUSG00000044229	Nxpe4	0.0140685	0.0127576	-0.0551535	0.00851228	0.179	0.235333	1	0
ENSMUSG00000026199	Ankzf1	0.0141401	0.0156386	0.0713693	0.0155782	0.132	0.0866667	1	0
ENSMUSG00000028070	Naxe	0.0141443	0.0222478	0.0879706	0.01527	0.138	0.09	1	0
ENSMUSG00000023068	Nus1	0.0142126	0.0187972	-0.0754165	0.0102563	0.153	0.209	1	0
ENSMUSG00000039108	Lsm14b	0.0142228	0.0122054	0.0602091	0.00977533	0.134	0.0903333	1	0
ENSMUSG00000055109	Gm15155	0.0142752	0.0112643	0.141561	0.0191144	0.715	0.705333	1	0	SFARI;EAGLE		Definitive	17.6	Discordant	2	0
ENSMUSG00000037857	Nufip2	0.0142871	0.0109992	-0.0945987	0.0175587	0.291	0.353667	1	0
ENSMUSG00000004285	Atp6v1f	0.0143007	0.0121964	0.0491151	0.00602004	0.112	0.0713333	1	0
ENSMUSG00000024054	Smchd1	0.0143878	0.00587644	-0.0730667	0.00361113	0.301	0.369333	1	0
ENSMUSG00000028969	Cdk5	0.0144144	0.00417968	0.06598	0.00509859	0.138	0.096	1	0
ENSMUSG00000118664	Tusc3	0.0144479	0.00490761	-0.0915643	0.0103208	0.768	0.795	1	0
ENSMUSG00000018707	Dync1h1	0.0144912	0.021802	0.103861	0.0253891	0.403	0.337	1	0	SFARI;EAGLE;TADA	3.36e-05	Definitive	13.45	Concordant	1	0
ENSMUSG00000017421	Zfp207	0.0145286	0.00988575	0.112059	0.00543385	0.638	0.6	1	0
ENSMUSG00000040048	Ndufb10	0.0145876	0.0123504	0.0838891	0.020015	0.185	0.133333	1	0
ENSMUSG00000024862	Klc2	0.0147506	0.00553528	0.059633	0.00784582	0.124	0.0833333	1	0
ENSMUSG00000038351	Sgsm2	0.0147558	0.0160298	0.117387	0.0263083	0.363	0.297667	1	0
ENSMUSG00000014602	Kif1a	0.0148372	0.0213012	0.110467	0.0136399	0.4	0.334	1	0	SFARI;EAGLE		Limited	2.95	Discordant	2	1
ENSMUSG00000055639	Dach1	0.0148438	0.024548	-0.130619	0.024812	0.893	0.920667	1	0
ENSMUSG00000039428	Tmem135	0.0148478	0.00820652	-0.0899101	0.0130293	0.441	0.499667	1	0
ENSMUSG00000027255	Arfgap2	0.0149078	0.0103552	0.0453057	0.00821939	0.106	0.0673333	1	0
ENSMUSG00000032846	Zswim6	0.0151616	0.0215171	-0.110472	0.0348898	0.896	0.920333	1	0	SFARI						1
ENSMUSG00000026944	Abca2	0.0152063	0.0132884	0.0609855	0.0128798	0.2	0.146	1	0
ENSMUSG00000101970	Chaserr	0.0152474	0.0220747	-0.13022	0.0143301	0.347	0.402333	1	0
ENSMUSG00000015094	Npdc1	0.0152586	0.0131867	0.0785205	0.00895203	0.225	0.171	1	0
ENSMUSG00000024695	Zfp91	0.0152907	0.0169123	0.0630958	0.00942998	0.147	0.101667	1	0
ENSMUSG00000025980	Hspd1	0.015343	0.0140829	0.0747229	0.0150084	0.144	0.0983333	1	0
ENSMUSG00000000823	Zfp512b	0.0153639	0.023131	0.06523	0.0197102	0.193	0.136667	1	0
ENSMUSG00000078681	Tm2d3	0.015568	0.00911055	0.0609918	0.00227269	0.113	0.0746667	1	0
ENSMUSG00000022377	Asap1	0.0155969	0.0176009	-0.128091	0.0238867	0.493	0.544	1	0
ENSMUSG00000077450	Rab11b	0.0156238	0.0076226	0.0512198	0.00302536	0.107	0.0696667	1	0
ENSMUSG00000117743	Gm50232	0.0157646	0.0117023	0.0807121	0.0140373	0.151	0.107333	1	0
ENSMUSG00000033916	Chmp2a	0.0158575	0.0194651	0.0729816	0.0125929	0.146	0.0996667	1	0
ENSMUSG00000042211	Fbxo38	0.0158634	0.00354275	-0.088899	0.00747875	0.209	0.262333	1	0
ENSMUSG00000022240	Ctnnd2	0.0158685	0.00856005	-0.0900479	0.00883441	0.994	0.997	1	0	SFARI					2	0
ENSMUSG00000029036	Atad3a	0.0159239	0.00827159	0.0706685	0.00443644	0.138	0.0963333	1	0
ENSMUSG00000020333	Acsl6	0.0159455	0.00829556	0.0784984	0.0056021	0.25	0.194667	1	0
ENSMUSG00000037257	Aagab	0.015955	0.0201627	-0.0814468	0.0237587	0.141	0.194333	1	0
ENSMUSG00000019894	Slc6a15	0.0159652	0.0235273	0.0863609	0.0255968	0.19	0.135	1	0
ENSMUSG00000033007	Asic4	0.0159867	0.014964	0.0795124	0.0170229	0.176	0.126333	1	0
ENSMUSG00000030846	Tial1	0.0160008	0.00684409	0.101076	0.0124116	0.628	0.564667	1	0
ENSMUSG00000020889	Nr1d1	0.0160481	0.0171596	0.0577821	0.010936	0.104	0.0656667	1	0	SFARI					2	0
ENSMUSG00000037843	Vstm2l	0.0161715	0.020315	0.0806709	0.0150551	0.184	0.132667	1	0
ENSMUSG00000020124	Usp15	0.0162937	0.00954752	-0.106125	0.00875779	0.497	0.549667	1	0	SFARI					2	0
ENSMUSG00000037112	Sik2	0.0163166	0.0210689	-0.153432	0.0480363	0.547	0.600667	1	0
ENSMUSG00000063296	Tmem117	0.0163305	0.0181818	-0.0921375	0.022908	0.299	0.360333	1	0
ENSMUSG00000020776	Fbf1	0.0163868	0.0129273	0.0794383	0.012394	0.229	0.177	1	0
ENSMUSG00000038530	Rgs4	0.0164853	0.0213095	0.112774	0.00893787	0.309	0.251	1	0
ENSMUSG00000035045	Zc3h12b	0.016508	0.0176788	-0.0970906	0.0365941	0.328	0.402	1	0
ENSMUSG00000036817	Sun1	0.0165992	0.0191761	0.110411	0.0139032	0.321	0.263667	1	0
ENSMUSG00000025104	Hdgfl3	0.0166539	0.0135457	0.111858	0.0138301	0.493	0.437	1	0
ENSMUSG00000079157	Nalf1	0.0166826	0.0198395	-0.171854	0.0319711	0.332	0.394	1	0
ENSMUSG00000058318	Phf21a	0.0168045	0.00530787	-0.0989835	0.0012213	0.74	0.766	1	0	SFARI;EAGLE;TADA	0.00022532	Limited	5.35	Discordant	1	1
ENSMUSG00000041762	Gpr155	0.0168477	0.0128498	-0.115605	0.0149455	0.46	0.529667	1	0
ENSMUSG00000046101	Mcmdc2	0.0168567	0.0174482	0.0508946	0.0092792	0.112	0.0723333	1	0
ENSMUSG00000024777	Ppp2r5b	0.0168693	0.024952	0.0656016	0.0156557	0.128	0.0823333	1	0
ENSMUSG00000061136	Prpf40a	0.0168972	0.0260752	-0.104986	0.0304851	0.407	0.478333	1	0
ENSMUSG00000041164	Zmiz2	0.0169345	0.0129674	0.0708637	0.0123188	0.178	0.129	1	0
ENSMUSG00000020321	Mdh1	0.0169421	0.019346	0.127571	0.016096	0.453	0.4	1	0
ENSMUSG00000037601	Nme1	0.0171578	0.0177213	0.0602012	0.0107785	0.116	0.0763333	1	0
ENSMUSG00000018442	Derl2	0.0171702	0.026267	0.080224	0.0124951	0.128	0.084	1	0
ENSMUSG00000021700	Rab3c	0.0171832	0.0233261	-0.150193	0.0236771	0.481	0.549	1	0
ENSMUSG00000028467	Gba2	0.017383	0.01864	0.0964058	0.0138706	0.276	0.219667	1	0
ENSMUSG00000096929	A330023F24Rik	0.0174096	0.0192383	0.100176	0.0168829	0.787	0.753667	1	0
ENSMUSG00000061032	Rrp1	0.0174204	0.00627639	0.0740077	0.00555598	0.178	0.131333	1	0
ENSMUSG00000023965	Fbxl17	0.0174241	0.00893197	-0.110219	0.0092428	0.866	0.884667	1	0
ENSMUSG00000024211	Grm8	0.017485	0.0238209	-0.135982	0.0263299	0.343	0.409333	1	0
ENSMUSG00000053877	Srcap	0.0175324	0.0123343	0.0903778	0.0105706	0.272	0.217667	1	0	SFARI					1	0
ENSMUSG00000009647	Mcu	0.0175777	0.0112279	-0.0941134	0.0166567	0.429	0.490333	1	0
ENSMUSG00000025508	Rplp2	0.0177178	0.0191791	0.0731485	0.0130674	0.188	0.138667	1	0
ENSMUSG00000034157	Cipc	0.0177911	0.0162009	-0.0789964	0.0223135	0.328	0.391333	1	0
ENSMUSG00000024319	Vps52	0.0178781	0.0113235	0.0741132	0.0087188	0.154	0.111	1	0
ENSMUSG00000110375	Gm45323	0.0178873	0.0126275	0.0567249	0.013927	0.125	0.0836667	1	0
ENSMUSG00000028959	Fastk	0.0180328	0.0248559	0.0839404	0.013011	0.187	0.135667	1	0
ENSMUSG00000027164	Traf6	0.0180403	0.0209264	-0.0596494	0.011446	0.071	0.110333	1	0
ENSMUSG00000047843	Bri3	0.0181886	0.00588757	0.0654179	0.0022301	0.134	0.0936667	1	0
ENSMUSG00000078919	Dpm1	0.0182204	0.0187267	0.0667752	0.0145752	0.26	0.2	1	0
ENSMUSG00000027531	Impa1	0.0182687	0.0155828	0.0614954	0.00799551	0.138	0.096	1	0
ENSMUSG00000019986	Ahi1	0.0183533	0.0295376	-0.127429	0.0327139	0.857	0.908333	1	0	SFARI						1
ENSMUSG00000030374	Strn4	0.0183571	0.0146849	0.092039	0.0177767	0.237	0.183667	1	0
ENSMUSG00000051166	Eml5	0.0183853	0.00793849	-0.107648	0.0175302	0.8	0.828	1	0
ENSMUSG00000035355	Kcnh4	0.0184017	0.00972123	0.103424	0.00417454	0.337	0.281	1	0
ENSMUSG00000041638	Gcn1	0.0184356	0.0144807	0.0661906	0.00861172	0.16	0.115333	1	0
ENSMUSG00000020402	Vdac1	0.0185173	0.00207721	0.083535	0.00463003	0.325	0.268	1	0
ENSMUSG00000102252	Snrpn	0.0185196	0.024082	0.111579	0.0325106	0.65	0.609333	1	0
ENSMUSG00000049807	Arhgap23	0.0185862	0.00443662	-0.07497	0.0085782	0.071	0.105667	1	0
ENSMUSG00000003778	Brd8	0.0187553	0.0132528	0.0802121	0.00733777	0.312	0.252	1	0
ENSMUSG00000020412	Ascc2	0.0190027	0.0204439	0.0786385	0.0111526	0.25	0.195	1	0
ENSMUSG00000013089	Etv5	0.0190033	0.0219007	-0.0727774	0.0139344	0.181	0.239667	1	0
ENSMUSG00000020460	Rps27a	0.0190106	0.018786	0.0578583	0.0115515	0.149	0.104	1	0
ENSMUSG00000035441	Myo1d	0.0190389	0.0201235	-0.0675979	0.00974258	0.124	0.171333	1	0
ENSMUSG00000042524	Sun2	0.0190766	0.0165793	0.0710119	0.00695506	0.19	0.140667	1	0
ENSMUSG00000061762	Tac1	0.0191007	0.00200903	0.171168	0.00457754	0.668	0.632333	1	0
ENSMUSG00000032184	Lysmd2	0.0193188	0.00304087	0.0510802	0.00114023	0.107	0.0713333	1	0
ENSMUSG00000031166	Wdr13	0.0194036	0.0152133	0.0849664	0.0107133	0.225	0.174667	1	0
ENSMUSG00000053332	Gas5	0.0194063	0.023857	0.0964813	0.017973	0.322	0.260667	1	0
ENSMUSG00000051154	Commd3	0.01941	0.0214446	0.0668601	0.0148766	0.194	0.143667	1	0
ENSMUSG00000034312	Iqsec1	0.0195005	0.0226279	-0.134024	0.0215581	0.494	0.538333	1	0
ENSMUSG00000060780	Lrrtm1	0.0197555	0.0108185	0.0730199	0.00974455	0.226	0.175333	1	0
ENSMUSG00000024750	Zfand5	0.0198282	0.0207414	-0.0874905	0.0215716	0.188	0.245	1	0
ENSMUSG00000024335	Brd2	0.0198349	0.0329582	0.101248	0.0261212	0.231	0.168	1	0
ENSMUSG00000052040	Klf13	0.0198363	0.0202459	0.103931	0.00913112	0.185	0.140333	1	0
ENSMUSG00000011751	Sptbn4	0.0198481	0.0149864	0.105328	0.0134203	0.7	0.648667	1	0
ENSMUSG00000003378	Grik5	0.0200077	0.00729757	0.0755633	0.0085071	0.501	0.434333	1	0	SFARI					2	0
ENSMUSG00000025413	Ttc4	0.0201031	0.0168873	0.0960125	0.0227251	0.244	0.190667	1	0
ENSMUSG00000026058	Khdrbs2	0.0201071	0.0120295	0.137065	0.0254433	0.449	0.387333	1	0	SFARI					2	0
ENSMUSG00000074238	Ap1ar	0.0201121	0.0107332	-0.0712133	0.010172	0.169	0.219333	1	0
ENSMUSG00000020246	Hcfc2	0.0202511	0.0220023	-0.0748463	0.0223536	0.096	0.141667	1	0
ENSMUSG00000101872	Gm29237	0.0202977	0.0193352	0.106304	0.0164863	0.229	0.179	1	0
ENSMUSG00000037022	Mmaa	0.0203304	0.0262119	0.0687813	0.013422	0.256	0.196667	1	0
ENSMUSG00000063142	Kcnma1	0.0207386	0.0270346	-0.0808457	0.0162606	0.965	0.972667	1	0	SFARI					2	0
ENSMUSG00000026748	Plxdc2	0.0208721	0.010724	-0.106721	0.0172291	0.165	0.212667	1	0
ENSMUSG00000071723	Gspt2	0.0208829	0.0280762	0.0528834	0.00980172	0.121	0.079	1	0
ENSMUSG00000039221	Rpl22l1	0.0209281	0.0257171	0.0674269	0.0159111	0.172	0.124667	1	0
ENSMUSG00000090223	Pcp4	0.0211226	0.0169692	0.138092	0.0216564	0.538	0.486667	1	0
ENSMUSG00000022960	Donson	0.0211637	0.00570197	0.0604279	0.00297575	0.122	0.084	1	0
ENSMUSG00000020777	Acox1	0.0211794	0.0102275	0.0704849	0.00838357	0.285	0.227	1	0
ENSMUSG00000028519	Dab1	0.0212407	0.0182484	-0.10062	0.027968	0.982	0.981333	1	0
ENSMUSG00000027709	Mccc1	0.0213159	0.0137003	0.0728459	0.0085665	0.153	0.110667	1	0
ENSMUSG00000021895	Arhgef3	0.021349	0.0312052	0.127618	0.0364825	0.296	0.236667	1	0
ENSMUSG00000025531	Chm	0.0213907	0.017709	-0.084759	0.00887209	0.432	0.491333	1	0	SFARI					3	0
ENSMUSG00000028883	Sema3a	0.021402	0.0226912	-0.126306	0.0218477	0.312	0.376	1	0
ENSMUSG00000006273	Atp6v1b2	0.021411	0.028887	0.0924856	0.0229314	0.441	0.376667	1	0
ENSMUSG00000029054	Gabrd	0.021455	0.0134989	0.0868649	0.0202334	0.44	0.38	1	0
ENSMUSG00000029673	Auts2	0.021576	0.0154837	-0.0566478	0.0105023	1	1	1	0	SFARI;EAGLE;TADA	0.0046251	Definitive	35.5	Concordant	1	0
ENSMUSG00000046607	Hrk	0.0218152	0.0268019	0.0607678	0.0108818	0.104	0.067	1	0
ENSMUSG00000033287	Kctd17	0.0220595	0.0119659	0.143196	0.00962849	0.362	0.317333	1	0
ENSMUSG00000040044	Orc3	0.0223108	0.00395306	0.0997627	0.00865955	0.335	0.284333	1	0
ENSMUSG00000024544	Ldlrad4	0.0223485	0.0311356	-0.127612	0.0377343	0.785	0.83	1	0
ENSMUSG00000019790	Stxbp5	0.0225111	0.0277327	-0.111827	0.0286015	0.551	0.606	1	0	SFARI					2	0
ENSMUSG00000029056	Pank4	0.0227051	0.0305553	0.0575372	0.00822545	0.107	0.0693333	1	0
ENSMUSG00000022995	Enah	0.0227069	0.0249945	-0.0893408	0.0106613	0.297	0.358667	1	0
ENSMUSG00000025203	Scd2	0.022721	0.0136304	-0.103828	0.0156268	0.176	0.223667	1	0
ENSMUSG00000026888	Grb14	0.0227342	0.0234436	-0.118418	0.011907	0.129	0.172	1	0
ENSMUSG00000042148	Cox10	0.0227483	0.0286898	-0.0652745	0.0225806	0.107	0.153	1	0
ENSMUSG00000042807	Hecw2	0.0229301	0.0376735	-0.119871	0.0313559	0.869	0.897	1	0	SFARI					2	0
ENSMUSG00000027298	Tyro3	0.0230219	0.0191579	0.0791867	0.0176353	0.309	0.249	1	0
ENSMUSG00000056201	Cfl1	0.0234727	0.0266079	0.0719459	0.016857	0.191	0.14	1	0
ENSMUSG00000038495	Otud7b	0.0236128	0.0281227	-0.0716697	0.0177836	0.126	0.174	1	0
ENSMUSG00000022949	Clic6	0.0236231	0.0209556	0.053343	0.0159093	0.112	0.0723333	1	0
ENSMUSG00000059811	Atl2	0.0236888	0.0318658	0.114289	0.0221096	0.462	0.401	1	0
ENSMUSG00000018474	Chd3	0.0237263	0.0267099	0.101335	0.0368683	0.334	0.269667	1	0	SFARI					1	1
ENSMUSG00000020546	Stxbp4	0.023757	0.0248689	-0.0573318	0.0121931	0.099	0.141333	1	0
ENSMUSG00000038893	Fam117a	0.0238389	0.0284323	0.0526211	0.0129087	0.124	0.0816667	1	0
ENSMUSG00000062270	Morf4l1	0.0238807	0.0138999	0.090061	0.0133217	0.415	0.355	1	0
ENSMUSG00000032878	Ccdc85a	0.023945	0.0157931	-0.077755	0.020815	0.313	0.375	1	0
ENSMUSG00000022283	Pabpc1	0.0240035	0.0131514	0.0721321	0.0123765	0.307	0.251333	1	0	SFARI					3	0
ENSMUSG00000055067	Smyd3	0.024148	0.032254	-0.10048	0.0338167	0.869	0.891667	1	0
ENSMUSG00000051951	Xkr4	0.0241758	0.00306672	-0.0706174	0.0113112	0.912	0.941667	1	0
ENSMUSG00000034574	Daam1	0.0241849	0.0163985	-0.0730675	0.00663701	0.193	0.244333	1	0
ENSMUSG00000032657	Fam189b	0.0243011	0.0364712	0.0838544	0.0182	0.191	0.139333	1	0
ENSMUSG00000022390	Zc3h7b	0.0246585	0.017781	0.0628381	0.0107001	0.218	0.168333	1	0
ENSMUSG00000020936	Nmt1	0.0246848	0.0174156	0.0871623	0.0101124	0.294	0.241667	1	0
ENSMUSG00000040151	Hs2st1	0.0246974	0.0093845	-0.0892729	0.00390688	0.391	0.446333	1	0
ENSMUSG00000000560	Gabra2	0.0248332	0.0288382	-0.107329	0.0402183	0.826	0.867333	1	0
ENSMUSG00000037492	Zmat4	0.0248911	0.018634	-0.0778231	0.0195858	0.176	0.230333	1	0
ENSMUSG00000032946	Rasgrp2	0.0249177	0.0052731	0.114366	0.00925199	0.428	0.381667	1	0
ENSMUSG00000032526	Ss18l2	0.0251299	0.0222624	0.0599694	0.00914873	0.132	0.0923333	1	0
ENSMUSG00000001924	Uba1	0.025304	0.0272585	0.0540354	0.0171671	0.172	0.125	1	0
ENSMUSG00000045967	Gpr158	0.0253403	0.0368273	-0.118295	0.0360764	0.971	0.98	1	0
ENSMUSG00000039463	Slc9a8	0.0253793	0.0172506	0.0444056	0.00706095	0.11	0.0743333	1	0
ENSMUSG00000048410	Zfp407	0.0253892	0.00754792	-0.101811	0.0137065	0.546	0.589	1	0
ENSMUSG00000026111	Unc50	0.0255001	0.0250367	0.0727816	0.0184407	0.126	0.0853333	1	0
ENSMUSG00000016664	Pacsin2	0.0255738	0.0238208	0.0497853	0.0118159	0.116	0.0783333	1	0
ENSMUSG00000058589	Anks1b	0.0256181	0.0223186	-0.0718414	0.0114409	1	1	1	0	SFARI					2	1
ENSMUSG00000038535	Zfp280d	0.0256571	0.0263317	0.124442	0.0262666	0.766	0.750333	1	0
ENSMUSG00000031342	Gpm6b	0.0257572	0.0185142	-0.0844177	0.0115273	0.849	0.886667	1	0
ENSMUSG00000113216	Gm40841	0.0257733	0.0341827	-0.107289	0.0315711	0.21	0.266667	1	0
ENSMUSG00000034973	Dop1a	0.0257941	0.0204507	-0.0968004	0.0221808	0.396	0.458333	1	0
ENSMUSG00000057522	Spop	0.0258094	0.0168125	0.0948582	0.00937945	0.441	0.384333	1	0
ENSMUSG00000035964	Tmem59l	0.0258337	0.0353479	0.0670979	0.0280624	0.176	0.124333	1	0
ENSMUSG00000027189	Trim44	0.0258459	0.0222694	-0.101252	0.0131177	0.346	0.402333	1	0
ENSMUSG00000021911	Parg	0.0258484	0.0177535	-0.092594	0.0148012	0.34	0.394667	1	0
ENSMUSG00000001909	Trmt1	0.0258487	0.0208973	0.0530538	0.0129227	0.187	0.138	1	0
ENSMUSG00000026458	Ppfia4	0.0258605	0.0218681	0.0772312	0.0188731	0.212	0.160333	1	0
ENSMUSG00000038954	Supt3	0.0258961	0.0269687	-0.065079	0.0219644	0.222	0.282333	1	0
ENSMUSG00000071234	Syndig1l	0.0261605	0.0181825	0.0876476	0.0109344	0.319	0.268667	1	0
ENSMUSG00000043733	Ptpn11	0.0261866	0.0370497	0.0623269	0.0244965	0.35	0.280667	1	0	SFARI					1	1
ENSMUSG00000038400	Pmepa1	0.0262669	0.0217556	0.0951492	0.0194307	0.371	0.309667	1	0
ENSMUSG00000028661	Epha8	0.0262982	0.0167528	0.0518926	0.00801081	0.103	0.0686667	1	0
ENSMUSG00000097536	2610037D02Rik	0.0263861	0.0225487	-0.0680443	0.024261	0.15	0.203667	1	0
ENSMUSG00000020704	Asic2	0.0264654	0.00799934	-0.103008	0.00998552	0.749	0.792333	1	0
ENSMUSG00000044573	Acp1	0.0264999	0.0300703	0.110406	0.0212395	0.372	0.320667	1	0
ENSMUSG00000028452	Vcp	0.026552	0.0100656	0.0777223	0	0.224	0.177	1	0
ENSMUSG00000089832	Shkbp1	0.0266238	0.0398181	0.0604783	0.0208515	0.165	0.114333	1	0
ENSMUSG00000052551	Adarb2	0.0266561	0.0313235	-0.139311	0.033961	0.318	0.370667	1	0
ENSMUSG00000045038	Prkce	0.0266827	0.0162357	-0.110425	0.00929584	0.931	0.942667	1	0
ENSMUSG00000000531	Tamalin	0.026696	0.0276292	0.0704081	0.0214335	0.182	0.135	1	0
ENSMUSG00000052087	Rgs14	0.0267686	0.0399834	0.0607057	0.0129952	0.119	0.0786667	1	0
ENSMUSG00000040794	C1qtnf4	0.0268309	0.0227101	0.102033	0.0232548	0.521	0.468	1	0
ENSMUSG00000022607	Ptk2	0.0271416	0.00837968	-0.0804364	0.0135459	0.731	0.76	1	0
ENSMUSG00000052479	A330008L17Rik	0.0271913	0.020927	-0.0815273	0.0229368	0.299	0.361667	1	0
ENSMUSG00000062590	Armc9	0.027326	0.0238185	0.103359	0.0378328	0.462	0.401	1	0
ENSMUSG00000046836	Brox	0.0274469	0.0192144	-0.0487674	0.0080539	0.1	0.140667	1	0
ENSMUSG00000026825	Dnm1	0.027592	0.0122075	0.0920527	0.00227997	0.404	0.350333	1	0
ENSMUSG00000089715	Cbx6	0.0276217	0.0224873	0.088043	0.0100633	0.282	0.232333	1	0
ENSMUSG00000042064	Myo3b	0.0276777	0.0225903	-0.102162	0.0303638	0.199	0.251	1	0
ENSMUSG00000046201	Scaf8	0.0277498	0.0101138	-0.0733431	0.00762862	0.509	0.560333	1	0
ENSMUSG00000003033	Ap1m1	0.0278617	0.0257547	0.062676	0.0139455	0.182	0.137333	1	0
ENSMUSG00000031256	Cstf2	0.0278937	0.0352377	0.102214	0.0181036	0.306	0.255	1	0
ENSMUSG00000112586	Gm6729	0.0280066	0.00579586	0.047697	0.00110543	0.138	0.099	1	0
ENSMUSG00000022489	Pde1b	0.0280371	0.04642	0.134341	0.0350135	0.768	0.718333	1	0
ENSMUSG00000033769	Exoc6b	0.0280389	0.0180888	-0.0865381	0.0189236	0.676	0.705	1	0	SFARI					2	0
ENSMUSG00000018476	Kdm6b	0.0283322	0.0252512	0.0637088	0.0200432	0.106	0.0683333	1	0	SFARI;EAGLE;TADA	0.00038344	Definitive	13.75	Concordant	1	0
ENSMUSG00000059824	Dbp	0.0283542	0.0465207	0.110389	0.0292584	0.331	0.269333	1	0
ENSMUSG00000068151	A230006K03Rik	0.0284221	0.0339807	0.0873395	0.0192141	0.841	0.818333	1	0
ENSMUSG00000023018	Smarcd1	0.0284441	0.0269673	0.0837688	0.00647231	0.212	0.164667	1	0
ENSMUSG00000030881	Arfip2	0.0284584	0.0429284	0.0532643	0.0147955	0.118	0.077	1	0
ENSMUSG00000002984	Tomm40	0.0284636	0.0408538	-0.0753387	0.0225805	0.131	0.178667	1	0
ENSMUSG00000021913	Ogdhl	0.0284825	0.00612901	0.0574855	0	0.119	0.0836667	1	0
ENSMUSG00000053702	Nebl	0.0286454	0.0309383	-0.104367	0.0243029	0.91	0.948667	1	0
ENSMUSG00000048264	Dip2c	0.0286947	0.0229922	-0.100624	0.0228151	0.925	0.929	1	0	SFARI					2	0
ENSMUSG00000040857	Erf	0.0287839	0.0235649	0.0538058	0.00892908	0.103	0.0686667	1	0
ENSMUSG00000058260	Serpina9	0.0288908	0.0239353	0.051916	0.00587261	0.116	0.0796667	1	0
ENSMUSG00000074212	Dnajb14	0.0289007	0.0346785	0.0784056	0.0199086	0.21	0.158667	1	0
ENSMUSG00000025184	R3hcc1l	0.0289888	0.0375319	-0.0713125	0.0121823	0.137	0.184	1	0
ENSMUSG00000042156	Dzip1	0.0290123	0.0265313	0.0564554	0.020081	0.138	0.0936667	1	0
ENSMUSG00000019210	Atp6v1e1	0.0290508	0.0198992	0.0921054	0.0122041	0.253	0.204333	1	0
ENSMUSG00000028863	Meaf6	0.0291467	0.0240921	0.0619266	0.0156721	0.162	0.116667	1	0
ENSMUSG00000053963	Stum	0.029239	0.0228851	0.055815	0.00997974	0.194	0.147	1	0
ENSMUSG00000029621	Arpc1a	0.0292518	0.0297828	0.0941681	0.0179609	0.315	0.261667	1	0
ENSMUSG00000055116	Arntl	0.0292549	0.011837	-0.100041	0.0136708	0.254	0.301667	1	0
ENSMUSG00000044252	Osbpl1a	0.029271	0.0338311	-0.062797	0.0255847	0.221	0.280333	1	0
ENSMUSG00000001062	Vps9d1	0.0293413	0.0206181	0.070789	0.0178681	0.26	0.208333	1	0
ENSMUSG00000016921	Srsf6	0.0293699	0.0122566	0.0755152	0.00700374	0.246	0.197	1	0
ENSMUSG00000071669	Snx29	0.0293957	0.0409611	-0.0896981	0.0342302	0.251	0.315	1	0
ENSMUSG00000027457	Snph	0.0294121	0.0123643	0.0911699	0.000926004	0.319	0.269	1	0
ENSMUSG00000034687	Fras1	0.0294813	0.0363297	-0.110997	0.0198878	0.657	0.718	1	0
ENSMUSG00000005698	Ctcf	0.0295459	0.0104162	-0.0616183	0.00791353	0.216	0.268333	1	0	SFARI;EAGLE;TADA	1.33e-07	Moderate	10.45	Discordant	1	1
ENSMUSG00000038486	Sv2a	0.0296648	0.0222416	0.108062	0.00774979	0.299	0.246333	1	0
ENSMUSG00000029632	Ndufa4	0.0296873	0.0455257	0.104986	0.0291782	0.254	0.196667	1	0
ENSMUSG00000038578	Susd1	0.0297056	0.026672	-0.088313	0.0248578	0.213	0.266	1	0
ENSMUSG00000030002	Dusp11	0.0298294	0.0386193	0.0952891	0.0368102	0.5	0.432333	1	0
ENSMUSG00000022340	Sybu	0.0298428	0.00659382	-0.106895	0.00944867	0.591	0.637333	1	0	SFARI					3	0
ENSMUSG00000025047	Pdcd11	0.029879	0.022758	0.0531225	0.0039315	0.154	0.112667	1	0
ENSMUSG00000001542	Ell2	0.02995	0.0235684	-0.048375	0.0185141	0.149	0.199	1	0
ENSMUSG00000032393	Dpp8	0.0299899	0.0353265	-0.0850106	0.0251978	0.285	0.348333	1	0
ENSMUSG00000052997	Uba2	0.0301426	0.0398094	0.0782501	0.019316	0.194	0.145333	1	0
ENSMUSG00000025318	Jph3	0.0301571	0.0461412	0.067109	0.0237079	0.219	0.163667	1	0
ENSMUSG00000033174	Mgll	0.030283	0.0391542	0.0844016	0.0281422	0.225	0.171667	1	0
ENSMUSG00000026269	Rnpepl1	0.0302868	0.00468611	0.0519089	0.00195753	0.116	0.0813333	1	0
ENSMUSG00000025370	Cdh9	0.0303116	0.0285298	-0.134066	0.00547021	0.621	0.666333	1	0	SFARI					2	0
ENSMUSG00000114218	Gm47423	0.0303977	0.0228086	0.0705817	0.00517663	0.11	0.0763333	1	0
ENSMUSG00000024268	Celf4	0.0304028	0.0296493	0.0893824	0.046225	0.713	0.659667	1	0	SFARI;EAGLE;TADA	0.0208728	Moderate	8.5	Discordant	1	0
ENSMUSG00000022052	Ppp2r2a	0.0304534	0.0222404	-0.100567	0.0100373	0.7	0.734667	1	0
ENSMUSG00000036052	Dnajb5	0.0305957	0.0415916	0.0610627	0.0165882	0.131	0.0886667	1	0
ENSMUSG00000098051	Gm27032	0.0307058	0.0281125	0.0691094	0.0156699	0.228	0.178333	1	0
ENSMUSG00000034390	Cmip	0.0307113	0.0286485	-0.0811344	0.0313747	0.301	0.359667	1	0	SFARI					2	0
ENSMUSG00000073888	Ccl27a	0.0308023	0.00853074	0.0547372	0.00224815	0.125	0.089	1	0
ENSMUSG00000062627	Mysm1	0.0309024	0.0318909	0.0966115	0.00775327	0.274	0.225333	1	0
ENSMUSG00000036298	Slc2a13	0.0309231	0.0473895	-0.0759734	0.0479405	0.847	0.873	1	0
ENSMUSG00000033615	Cplx1	0.0309862	0.0338663	0.057982	0.0138759	0.151	0.109667	1	0
ENSMUSG00000000308	Ckmt1	0.031128	0.0359808	0.0784977	0.0209048	0.169	0.122333	1	0
ENSMUSG00000074794	Arrdc3	0.0311894	0.0119463	-0.0684387	0.00321806	0.087	0.121667	1	0
ENSMUSG00000022105	Rb1	0.0311998	0.0346788	-0.104686	0.013705	0.278	0.326	1	0
ENSMUSG00000020022	Ndufa12	0.0312767	0.0285947	0.0590942	0.00951042	0.138	0.0986667	1	0
ENSMUSG00000054013	Tmem179	0.0312777	0.0252719	0.0617484	0.0106288	0.131	0.0933333	1	0
ENSMUSG00000028041	Adam15	0.0313587	0.0393582	0.0632518	0.0115363	0.149	0.106	1	0
ENSMUSG00000042359	Osbpl6	0.0313655	0.0295325	-0.112251	0.0254024	0.457	0.512667	1	0
ENSMUSG00000089872	Rps6kc1	0.0314453	0.0189077	-0.0648028	0.00735676	0.247	0.301667	1	0
ENSMUSG00000052915	Msl1	0.0314551	0.0214624	0.0590749	0.00867566	0.237	0.185667	1	0
ENSMUSG00000056367	Actr3b	0.0316966	0.0341464	0.117948	0.0393659	0.562	0.498667	1	0
ENSMUSG00000030120	Mlf2	0.0317577	0.00823221	0.0680152	0.00719536	0.253	0.204333	1	0
ENSMUSG00000022791	Tnk2	0.0317722	0.0420417	0.0736291	0.0200236	0.243	0.189667	1	0
ENSMUSG00000064127	Med14	0.032072	0.0213859	-0.103642	0.0220412	0.347	0.396333	1	0
ENSMUSG00000021252	Erg28	0.0321728	0.0197003	0.047179	0.0091981	0.121	0.084	1	0
ENSMUSG00000000552	Zfp385a	0.0322213	0.0158823	0.0581697	0.00609543	0.146	0.106667	1	0
ENSMUSG00000008763	Man1a2	0.0322652	0.0309904	-0.107065	0.0495924	0.653	0.710667	1	0
ENSMUSG00000031765	Mt1	0.0322683	0.0358437	0.0701421	0.00942861	0.159	0.117	1	0
ENSMUSG00000021288	Klc1	0.0324847	0.0111761	0.0694287	0.0144667	0.432	0.374667	1	0
ENSMUSG00000042428	Mgat3	0.0327349	0.0288077	0.0538774	0.00403054	0.126	0.0893333	1	0
ENSMUSG00000052928	Ctif	0.033123	0.0221797	-0.0572691	0.0130927	0.11	0.150667	1	0
ENSMUSG00000007617	Homer1	0.0331929	0.028121	-0.0502214	0.0254847	0.884	0.908	1	0	SFARI					2	0
ENSMUSG00000051285	Pcmtd1	0.033271	0.0217809	0.0796043	0.0105734	0.778	0.732667	1	0
ENSMUSG00000089847	Timm10b	0.0333344	0.0497269	0.0567568	0.0142249	0.106	0.0683333	1	0
ENSMUSG00000026516	Nvl	0.0333869	0.027331	0.0772755	0.00361113	0.428	0.37	1	0
ENSMUSG00000020752	Recql5	0.0334219	0.0308922	0.0571613	0.0154525	0.124	0.0853333	1	0
ENSMUSG00000031840	Rab3a	0.0334242	0.0397519	0.0824513	0.0198784	0.179	0.135333	1	0
ENSMUSG00000006024	Napa	0.0334441	0.0412306	0.065932	0.0146504	0.153	0.11	1	0
ENSMUSG00000036782	Klhl13	0.0334635	0.00836948	-0.104743	0.00639497	0.387	0.436333	1	0
ENSMUSG00000009535	Rnmt	0.033483	0.0143622	-0.0477639	0.000992186	0.163	0.211333	1	0
ENSMUSG00000029406	Pitpnm2	0.0334957	0.0365941	0.110068	0.0127378	0.478	0.423	1	0
ENSMUSG00000027350	Chgb	0.0335446	0.0102058	0.0600696	0.00886639	0.24	0.191333	1	0
ENSMUSG00000062070	Pgk1	0.0336621	0.0445047	0.0698928	0.022753	0.181	0.133667	1	0
ENSMUSG00000024661	Fth1	0.0336644	0.0302726	0.0819381	0.0133353	0.388	0.334	1	0
ENSMUSG00000044894	Uqcrq	0.0336762	0.0275503	0.0612892	0.0137292	0.169	0.126	1	0
ENSMUSG00000021870	Slmap	0.0337421	0.0189879	-0.101112	0.00254743	0.707	0.737667	1	0
ENSMUSG00000029312	Klhl8	0.0340501	0.0329852	-0.0619754	0.018474	0.107	0.148667	1	0
ENSMUSG00000056342	Usp34	0.0341942	0.0467622	-0.100664	0.0306586	0.815	0.867333	1	0
ENSMUSG00000043067	Dpy19l1	0.0342387	0.0389773	-0.060695	0.0130341	0.097	0.136333	1	0
ENSMUSG00000073427	Gm4924	0.0342728	0.032676	-0.0687208	0.0165184	0.14	0.184333	1	0
ENSMUSG00000031060	Rbm10	0.0343063	0.0416656	0.0811472	0.0110774	0.251	0.2	1	0
ENSMUSG00000029053	Prkcz	0.0345077	0.0524449	0.0962753	0.0347827	0.581	0.522667	1	0
ENSMUSG00000018401	Mtmr4	0.0345339	0.0271733	0.0443517	0.0179668	0.129	0.0903333	1	0
ENSMUSG00000028126	Pip5k1a	0.0348223	0.0377396	0.107001	0.0154069	0.496	0.445	1	0
ENSMUSG00000021461	Fancc	0.0350128	0.0182237	-0.0493789	0.00102516	0.129	0.172667	1	0
ENSMUSG00000025512	Chid1	0.0351778	0.0348054	0.0706226	0.0248174	0.144	0.100333	1	0
ENSMUSG00000034120	Srsf2	0.0352271	0.0176637	0.108584	0.00880827	0.407	0.360667	1	0
ENSMUSG00000110803	Gm20275	0.0353386	0.0236028	-0.0967568	0.019694	0.518	0.579667	1	0
ENSMUSG00000021098	4930447C04Rik	0.0354377	0.0403708	-0.0834087	0.031217	0.149	0.195333	1	0
ENSMUSG00000019948	Actr6	0.0354782	0.0608884	0.0743694	0.0299327	0.143	0.0896667	0.926441	0.127409
ENSMUSG00000036273	Lrrk2	0.0354872	0.0412203	-0.0759262	0.019981	0.753	0.812667	1	0
ENSMUSG00000018796	Acsl1	0.0355107	0.0440755	0.0834395	0.0167079	0.187	0.141667	1	0
ENSMUSG00002075217	ENSMUSG00002075217	0.0356021	0.024445	-0.0620778	0.0155512	0.116	0.156333	1	0
ENSMUSG00000037300	Ttc13	0.0357993	0.0448095	0.0622769	0.0149518	0.21	0.161	1	0
ENSMUSG00000023952	Gtpbp2	0.0359818	0.042069	0.0784289	0.0201027	0.247	0.194667	1	0
ENSMUSG00000038127	Ccdc50	0.0360748	0.0339993	-0.0610498	0.0197956	0.115	0.158667	1	0
ENSMUSG00000111061	Gm46102	0.0361163	0.0458579	-0.0540316	0.00748956	0.081	0.118	1	0
ENSMUSG00000051067	Lingo3	0.0361285	0.0563696	0.071133	0.026047	0.24	0.183667	1	0
ENSMUSG00000018379	Srsf1	0.0361492	0.0282078	0.104719	0.0107478	0.419	0.372667	1	0
ENSMUSG00000034820	Cpsf7	0.0361922	0.0526178	0.0640886	0.0190692	0.249	0.193333	1	0	TADA	0.0252972
ENSMUSG00000033253	Szt2	0.0363819	0.0362234	0.0611552	0.0177911	0.144	0.103	1	0
ENSMUSG00000112730	4930567K20Rik	0.0365341	0.0437654	0.0602162	0.0215125	0.232	0.181	1	0
ENSMUSG00000035067	Xkr6	0.0367072	0.0576231	-0.0988637	0.0341843	0.853	0.864333	1	0
ENSMUSG00000014850	Msh3	0.0367228	0.0478989	-0.0755269	0.0265304	0.207	0.259333	1	0
ENSMUSG00000003402	Prkcsh	0.0368933	0.0164568	0.0461728	0.00338365	0.113	0.0793333	1	0
ENSMUSG00000108867	Gm44643	0.0369103	0.00788023	0.069607	0.00925874	0.266	0.218333	1	0
ENSMUSG00000060510	Zfp266	0.0370177	0.0411042	-0.0722443	0.0113328	0.218	0.269	1	0
ENSMUSG00000040667	Nup88	0.0371783	0.0545318	0.0802221	0.0235623	0.274	0.217333	1	0
ENSMUSG00000036667	Tcaf1	0.0371861	0.0433006	-0.119747	0.0183332	0.587	0.643667	1	0
ENSMUSG00000056673	Kdm5d	0.0371989	0.0220848	0.0805938	0.00740092	0.382	0.331	1	0
ENSMUSG00000036510	Cdh8	0.0377091	0.0343285	-0.111212	0.0309812	0.894	0.904333	1	0	SFARI					2	0
ENSMUSG00000024515	Smad4	0.0377244	0.0300766	-0.100816	0.0180778	0.4	0.447333	1	0	SFARI					2	0
ENSMUSG00000028973	Abcb8	0.0377691	0.0388944	0.0572726	0.0159528	0.113	0.0753333	1	0
ENSMUSG00000026277	Stk25	0.0378953	0.00705566	0.0685347	0.00102139	0.225	0.181	1	0
ENSMUSG00000039568	Ubald1	0.0381471	0.0177313	0.0418988	0.00408665	0.113	0.079	1	0
ENSMUSG00000024639	Gnaq	0.0381481	0.028118	-0.107403	0.0137367	0.6	0.654333	1	0
ENSMUSG00000055128	Cgrrf1	0.0381494	0.0252819	0.0493636	0.00386265	0.126	0.091	1	0
ENSMUSG00000037958	Nsrp1	0.0381499	0.020748	0.0476669	0.00300006	0.107	0.0746667	1	0
ENSMUSG00000050812	Ecpas	0.0382637	0.048245	-0.0831276	0.019737	0.821	0.867	1	0	SFARI					2	0
ENSMUSG00000026000	Lancl1	0.0383557	0.0514279	0.0954335	0.0290194	0.303	0.248	1	0
ENSMUSG00000047935	Sox1ot	0.0384254	0.0161653	-0.0455962	0.00394581	0.072	0.104	1	0
ENSMUSG00000030310	Slc6a1	0.0384291	0.0382522	0.0836328	0.0298744	0.418	0.36	1	0	SFARI;EAGLE;TADA	5.91e-10	Definitive	31.15	Concordant	1	1
ENSMUSG00000045973	Slc25a51	0.0384557	0.0527915	0.0539823	0.013706	0.11	0.0743333	1	0
ENSMUSG00000009112	Bcl2l13	0.03848	0.0433964	-0.0606308	0.0211546	0.096	0.136	1	0
ENSMUSG00000025656	Arhgef9	0.0385473	0.0291442	-0.0754687	0.019723	0.797	0.849667	1	0	SFARI;EAGLE		Definitive	14.2	Concordant	1	1
ENSMUSG00000070802	Pnma8b	0.0385936	0.00606267	0.0471008	0.00404264	0.119	0.0846667	1	0
ENSMUSG00000047368	Abhd17b	0.0386468	0.0421211	-0.0617219	0.0153208	0.15	0.196333	1	0
ENSMUSG00000024384	Iws1	0.0386729	0.0416531	-0.0752032	0.014032	0.193	0.241333	1	0
ENSMUSG00000058600	Rpl30	0.0388324	0.0216978	0.0565633	0.00383007	0.181	0.139	1	0
ENSMUSG00000090386	Mir99ahg	0.0388801	0.0329749	-0.103571	0.0131875	0.629	0.68	1	0
ENSMUSG00000031932	Gpr83	0.0390096	0.0190217	0.0481955	0.00373017	0.203	0.157667	1	0
ENSMUSG00000019947	Arid5b	0.0392026	0.0487963	-0.107734	0.0242724	0.215	0.264667	1	0
ENSMUSG00000042680	Garem1	0.0394021	0.0490812	-0.0926937	0.0259059	0.541	0.604333	1	0
ENSMUSG00000020156	Pwwp3a	0.0396637	0.0502011	0.0551241	0.0100418	0.113	0.0776667	1	0
ENSMUSG00000026843	Fubp3	0.0397632	0.0326586	0.0593855	0.012992	0.262	0.210667	1	0	TADA	0.0808757
ENSMUSG00000032525	Nktr	0.0398609	0.0273002	0.0911777	0.0156675	0.709	0.655	1	0
ENSMUSG00000017664	Slc35c2	0.0401765	0.0290072	0.047898	0.0108298	0.121	0.0853333	1	0
ENSMUSG00000027254	Map1a	0.0401819	0.0254207	0.0610618	0.0111806	0.225	0.178667	1	0	SFARI;EAGLE;TADA	0.00686837	No scorable evidence	0	Discordant	1	0
ENSMUSG00000038910	Plcl2	0.0402602	0.0317784	-0.0789873	0.0190883	0.819	0.863667	1	0
ENSMUSG00000040652	Oaz2	0.0402655	0.00788255	0.0558393	0.00286787	0.159	0.120667	1	0
ENSMUSG00000040940	Arhgef1	0.0403261	0.0548511	0.0394882	0.0144609	0.106	0.07	1	0
ENSMUSG00000019888	Mgat4c	0.0403317	0.0503418	0.0683473	0.0305962	0.866	0.837333	1	0
ENSMUSG00000044533	Rps2	0.0403412	0.0249755	0.068495	0.00702356	0.24	0.194333	1	0
ENSMUSG00000027834	Serpini1	0.0403831	0.0366758	0.0688359	0.0174606	0.229	0.182333	1	0
ENSMUSG00000052738	Suclg1	0.0404818	0.0248412	0.0703939	0.00446265	0.225	0.180333	1	0
ENSMUSG00000030020	Prickle2	0.0404866	0.0598196	-0.144575	0.0457273	0.563	0.610667	1	0	SFARI					2	0
ENSMUSG00000034024	Cct2	0.0404957	0.0308652	0.0527032	0.0114959	0.138	0.100667	1	0
ENSMUSG00000031112	Stk26	0.0405093	0.0505878	0.0971597	0.010518	0.393	0.34	1	0
ENSMUSG00000003458	Ncstn	0.0405112	0.0398702	0.0736825	0.0116252	0.138	0.101	1	0
ENSMUSG00000034557	Zfyve9	0.0405295	0.0375605	-0.0938159	0.0285882	0.497	0.555333	1	0
ENSMUSG00000075700	Selenot	0.0405346	0.0289724	-0.0644145	0.0066799	0.131	0.172333	1	0
ENSMUSG00000063600	Egfem1	0.0407109	0.0416271	-0.0886877	0.0229704	0.69	0.768	1	0
ENSMUSG00000086171	Pcsk2os1	0.0408249	0.0249347	0.0441657	0.0058488	0.11	0.077	1	0
ENSMUSG00000024121	Atp6v0c	0.0408439	0.057302	0.103744	0.0267433	0.485	0.434333	1	0
ENSMUSG00000048602	Morc2b	0.0408584	0.0232976	-0.055561	0.00480345	0.116	0.155	1	0
ENSMUSG00000038170	Pde4dip	0.0410412	0.0574867	-0.0828685	0.015078	0.699	0.736333	1	0
ENSMUSG00000032867	Fbxw8	0.0411024	0.0296495	0.0589613	0.00856465	0.15	0.112333	1	0
ENSMUSG00000068328	Aup1	0.0411978	0.0219001	0.0552536	0.00494258	0.109	0.0763333	1	0
ENSMUSG00000024983	Vti1a	0.0413564	0.0241465	-0.0871078	0.0155028	0.578	0.625667	1	0
ENSMUSG00000059361	Nrsn2	0.0413801	0.0417031	0.0502166	0.0115514	0.14	0.101	1	0
ENSMUSG00000038267	Slc22a23	0.041753	0.0338836	-0.105757	0.0145528	0.562	0.604	1	0
ENSMUSG00000013921	Clip3	0.041906	0.00524743	0.0542369	0.00190581	0.14	0.103667	1	0
ENSMUSG00000057440	Mpp7	0.0420007	0.0191462	-0.100186	0.0200271	0.406	0.447333	1	0
ENSMUSG00000025151	Maged1	0.0420595	0.00821842	0.085532	0.00550422	0.403	0.353333	1	0
ENSMUSG00000055761	Nkain3	0.0420753	0.0631	0.149003	0.0535497	0.679	0.632667	1	0
ENSMUSG00000096914	Galntl6	0.0420766	0.0613694	-0.0929688	0.0478431	0.913	0.943333	1	0
ENSMUSG00000024146	Cript	0.0421431	0.0331608	0.0590041	0.00586777	0.131	0.0956667	1	0
ENSMUSG00000021650	Ptcd2	0.0421543	0.0452997	0.0472269	0.0108373	0.106	0.0723333	1	0
ENSMUSG00000006651	Aplp1	0.042212	0.0451928	0.0923652	0.0268177	0.521	0.477333	1	0
ENSMUSG00000034247	Plekhm1	0.0424502	0.0181823	0.0479371	0.00337907	0.116	0.0826667	1	0
ENSMUSG00000000563	Atp5pb	0.0426398	0.029113	0.0825123	0.0147427	0.334	0.287333	1	0
ENSMUSG00000044712	Slc38a6	0.0428002	0.0378073	-0.0494186	0.0147174	0.122	0.164667	1	0
ENSMUSG00000039037	St6galnac5	0.0428782	0.0229462	-0.102436	0.018872	0.632	0.665333	1	0
ENSMUSG00000061589	Dot1l	0.0429076	0.0340822	0.0910643	0.0253768	0.4	0.346667	1	0
ENSMUSG00000025468	Caly	0.0429251	0.0346318	0.0846029	0.0137754	0.34	0.289667	1	0
ENSMUSG00000017210	Med24	0.0429905	0.0407916	0.0783155	0.0153713	0.185	0.142	1	0
ENSMUSG00000021719	Rgs7bp	0.0431052	0.0332842	-0.101158	0.0207806	0.829	0.861	1	0
ENSMUSG00000054728	Phactr1	0.0433302	0.0688049	-0.0620952	0.0265548	1	0.999	1	0
ENSMUSG00000031161	Hdac6	0.0434843	0.0497178	0.0641673	0.0126603	0.131	0.0936667	1	0
ENSMUSG00000085667	Gm12992	0.0435701	0.0345571	0.0579183	0.0083203	0.143	0.104	1	0
ENSMUSG00000029469	Ift81	0.0436147	0.0186304	0.0561627	0.00489138	0.171	0.131	1	0
ENSMUSG00000045404	Kcnk13	0.0436159	0.0441755	-0.0768926	0.0265015	0.135	0.18	1	0
ENSMUSG00000117521	Gm50024	0.0438134	0.0355031	-0.11245	0.0362878	0.265	0.310667	1	0
ENSMUSG00000029125	Stx18	0.0438423	0.0326178	-0.0864248	0.00643448	0.231	0.276	1	0
ENSMUSG00000048915	Efna5	0.044028	0.0185558	-0.146463	0.015024	0.382	0.429667	1	0
ENSMUSG00000025812	Pard3	0.04408	0.0521436	-0.0857874	0.0217088	0.929	0.939333	1	0
ENSMUSG00000041263	Rusc1	0.0440951	0.0213035	0.0477554	0.00699449	0.121	0.087	1	0
ENSMUSG00000031428	Zcchc18	0.0441472	0.0416492	0.0895607	0.0286225	0.487	0.434667	1	0
ENSMUSG00000085222	Gm13974	0.0442473	0.0441806	-0.117523	0.0350571	0.26	0.308	1	0
ENSMUSG00000028926	Cdk14	0.0442533	0.0656493	-0.0634831	0.0188637	0.116	0.161333	1	0
ENSMUSG00000022186	Oxct1	0.0443815	0.00753019	-0.0634514	0.00639295	0.559	0.627	1	0
ENSMUSG00000074785	Plxnc1	0.0444276	0.00924917	0.0389528	0.015327	0.188	0.145667	1	0
ENSMUSG00000030811	Fbxl19	0.0446614	0.0527013	0.0543497	0.0129145	0.176	0.133	1	0
ENSMUSG00000035390	Brsk1	0.0446707	0.044616	0.0787964	0.0125925	0.207	0.163333	1	0
ENSMUSG00000037926	Ssh2	0.0447059	0.0395036	-0.109063	0.00895271	0.646	0.664	1	0
ENSMUSG00000030410	Dmwd	0.0451919	0.0175435	0.0421596	0.00513979	0.118	0.0843333	1	0	SFARI;TADA	0.00413177				2	0
ENSMUSG00000030329	Pianp	0.0451945	0.0354135	0.0587632	0.0102511	0.129	0.0943333	1	0
ENSMUSG00000060126	Tpt1	0.0452169	0.070141	0.0882535	0.0242765	0.181	0.133333	1	0
ENSMUSG00000032786	Alas1	0.0453958	0.0618479	0.0551849	0.0108829	0.141	0.101667	1	0
ENSMUSG00000036019	Tmtc2	0.0454048	0.0366699	-0.0748061	0.0275432	0.263	0.321333	1	0
ENSMUSG00000044288	Cnr1	0.045455	0.0414716	-0.0852887	0.0414508	0.454	0.521667	1	0	SFARI					2	0
ENSMUSG00000022897	Dyrk1a	0.0454904	0.0371143	-0.0843119	0.0228371	0.421	0.474333	1	0	SFARI;EAGLE;TADA	1.78e-13	Definitive	20.2	Concordant	1	1
ENSMUSG00000073565	Prr16	0.0455177	0.0657483	0.133587	0.0330095	0.341	0.286667	1	0
ENSMUSG00000020823	Sec14l1	0.0457724	0.0219892	0.0928907	0.00793878	0.625	0.576667	1	0
ENSMUSG00000033960	Jcad	0.0459245	0.0691003	-0.0919773	0.0312959	0.353	0.412	1	0
ENSMUSG00000029538	Srsf9	0.0459589	0.0231999	0.0618523	0.00450226	0.213	0.17	1	0
ENSMUSG00000026171	Rnf25	0.0460013	0.011	-0.054319	0.00166593	0.194	0.238333	1	0	SFARI					2	0
ENSMUSG00000060487	Samd5	0.0461077	0.04236	-0.113769	0.020709	0.59	0.635	1	0
ENSMUSG00000048644	Ctxn1	0.0461268	0.033379	0.0707134	0.0190437	0.271	0.223667	1	0
ENSMUSG00000030806	Stx1b	0.0462556	0.0223991	0.052717	0.00432136	0.159	0.121333	1	0
ENSMUSG00000041488	Stx3	0.0463031	0.0315702	0.055346	0.013359	0.21	0.165333	1	0
ENSMUSG00000033676	Gabrb3	0.0463343	0.0355726	-0.0657622	0.0127906	0.987	0.991667	1	0	SFARI					1	0
ENSMUSG00000050608	Micos10	0.0463553	0.0387472	0.0630938	0.00617442	0.225	0.179333	1	0
ENSMUSG00000070866	Zfp804a	0.0468792	0.0299067	-0.0858916	0.0138867	0.574	0.618333	1	0	SFARI					2	0
ENSMUSG00000063052	Lrrc40	0.0468913	0.0324813	0.0649025	0.0118835	0.254	0.208	1	0
ENSMUSG00000025609	Mkln1	0.0474129	0.0268384	0.0710484	0.0132083	0.504	0.446	1	0
ENSMUSG00000035863	Palm	0.0474367	0.036056	0.0727069	0.00789813	0.282	0.234667	1	0
ENSMUSG00000002997	Prkar2b	0.0474766	0.0249243	-0.124388	0.00982144	0.569	0.602	1	0
ENSMUSG00000068742	Cry2	0.0477301	0.0480297	0.0550705	0.0177931	0.293	0.239667	1	0
ENSMUSG00000047261	Gap43	0.0477734	0.0356113	-0.101146	0.0243788	0.378	0.431	1	0
ENSMUSG00000037210	Fam193a	0.0479383	0.0461491	-0.082358	0.0413832	0.554	0.610333	1	0
ENSMUSG00000036850	Mrpl41	0.0482193	0.0582539	0.0633077	0.0205711	0.278	0.227	1	0
ENSMUSG00000030682	Cdipt	0.0482405	0.0466701	0.0550454	0.0205109	0.129	0.0893333	1	0
ENSMUSG00000029920	Smarcad1	0.0482642	0.0442448	-0.0860254	0.0273231	0.356	0.411667	1	0
ENSMUSG00000063870	Chd4	0.0483025	0.0804653	0.123659	0.0515558	0.554	0.499333	1	0
ENSMUSG00000025885	Myo5b	0.0484308	0.0283236	0.0470814	0.0160913	0.146	0.108333	1	0
ENSMUSG00000021413	Prpf4b	0.0486921	0.0366987	0.101423	0.0189928	0.759	0.732667	1	0
ENSMUSG00000010453	Kansl3	0.0489882	0.0385131	0.0532879	0.0191292	0.216	0.170333	1	0
ENSMUSG00000051177	Plcb1	0.0490914	0.0447097	-0.0916222	0.0255636	0.999	0.998	1	0	SFARI					2	0
ENSMUSG00000000253	Gmpr	0.0491009	0.0449476	0.0732768	0.009799	0.247	0.202333	1	0
ENSMUSG00000025223	Ldb1	0.0491043	0.0480977	0.0631008	0.0231379	0.16	0.116667	1	0	SFARI;EAGLE;TADA	0.0826832	Limited	4	Discordant	1	0
ENSMUSG00000020571	Pdia6	0.0491254	0.0440338	0.0594893	0.0105828	0.171	0.129333	1	0
ENSMUSG00000005312	Ubqln1	0.0491905	0.0232975	-0.075117	0.00528571	0.153	0.192333	1	0
ENSMUSG00000003282	Plag1	0.0493128	0.03658	0.0490477	0.00665469	0.129	0.094	1	0
ENSMUSG00000008892	Vdac3	0.0493883	0.0342095	0.0514776	0.00748487	0.154	0.118	1	0
ENSMUSG00000059742	Kcnh7	0.0497485	0.0649705	-0.127822	0.04071	0.6	0.638333	1	0
ENSMUSG00000066643	Wdr35	0.0497968	0.0669886	0.0414139	0.021263	0.168	0.122667	1	0
ENSMUSG00000020074	Ccar1	0.0500588	0.0501004	0.0927719	0.0221831	0.454	0.407	1	0
ENSMUSG00000060636	Rpl35a	0.0500858	0.0612714	0.0685429	0.0175516	0.184	0.141333	1	0
ENSMUSG00000031066	Usp11	0.0502249	0.085853	0.104174	0.0367458	0.247	0.188	1	0
ENSMUSG00000018428	Akap1	0.0504171	0.0337351	0.0584415	0.0103654	0.154	0.117333	1	0
ENSMUSG00000023010	Tmbim6	0.0504424	0.0414476	0.0550763	0.0128488	0.225	0.177	1	0
ENSMUSG00000053253	Ndfip2	0.0504755	0.0572876	-0.0925289	0.027455	0.428	0.474333	1	0
ENSMUSG00000025738	Fbxl16	0.0505284	0.00847782	0.110258	0.00904039	0.429	0.390333	1	0
ENSMUSG00000021290	Atp5mpl	0.0505372	0.0697987	0.0581724	0.0183674	0.131	0.091	1	0
ENSMUSG00000024948	Map4k2	0.0505494	0.0171388	0.0587719	0.00283467	0.166	0.129	1	0
ENSMUSG00000020738	Sumo2	0.0507833	0.0266582	0.0627052	0.0119753	0.2	0.159	1	0
ENSMUSG00000052584	Serp2	0.0510814	0.0328108	0.0590939	0.00628939	0.212	0.169	1	0
ENSMUSG00000063063	Ctnna2	0.0510969	0.040497	-0.0682099	0.0130406	0.996	0.991333	1	0	SFARI						1
ENSMUSG00000028161	Ppp3ca	0.0513393	0.0243333	0.0478279	0.0119975	1	1	1	0	SFARI					3	1
ENSMUSG00000026313	Hdac4	0.0513478	0.0754838	-0.0907082	0.0206318	0.226	0.276667	1	0	SFARI					2	1
ENSMUSG00000034290	Nek9	0.0513677	0.0586604	0.0755644	0.0201665	0.263	0.215	1	0
ENSMUSG00000022748	Cmss1	0.0514382	0.0587836	0.108391	0.0292379	0.819	0.830667	1	0
ENSMUSG00000056069	Otulinl	0.0516572	0.0751103	0.0730538	0.017941	0.271	0.218333	1	0
ENSMUSG00000037579	Kcnh3	0.0516877	0.0463531	0.0723874	0.027153	0.285	0.233	1	0
ENSMUSG00000079509	Zfx	0.0517217	0.0517118	-0.0737426	0.0197237	0.219	0.263667	1	0
ENSMUSG00000006058	Snf8	0.0517952	0.0499749	0.0515881	0.0101236	0.121	0.0863333	1	0
ENSMUSG00000032186	Tmod2	0.0518872	0.0424281	-0.0856181	0.021089	0.353	0.401333	1	0
ENSMUSG00000026991	Pkp4	0.0520181	0.0394753	-0.0948877	0.0301549	0.501	0.554333	1	0
ENSMUSG00000005510	Ndufs3	0.0521006	0.0432572	0.0726412	0.0143697	0.297	0.243667	1	0	EAGLE		No scorable evidence	0	Concordant
ENSMUSG00000021224	Numb	0.0522806	0.0545923	-0.0851535	0.0295455	0.388	0.443	1	0
ENSMUSG00000087259	2610035D17Rik	0.052281	0.0732525	-0.0530446	0.0232081	0.149	0.196	1	0
ENSMUSG00000031706	Rfx1	0.0522875	0.0442631	0.0460327	0.00871017	0.182	0.141333	1	0
ENSMUSG00000110834	Gm39469	0.0522882	0.079362	-0.0657153	0.0240921	0.135	0.182333	1	0
ENSMUSG00000021824	Ap3m1	0.0523795	0.0577718	0.078581	0.0143546	0.265	0.217667	1	0
ENSMUSG00000066877	Nck2	0.0525705	0.0818483	-0.0561514	0.0244454	0.097	0.138667	1	0
ENSMUSG00000028005	Gucy1b1	0.0526849	0.0482712	0.096229	0.0111392	0.45	0.403667	1	0
ENSMUSG00000068250	Amn1	0.0529407	0.0457661	-0.0573549	0.0208865	0.104	0.143333	1	0
ENSMUSG00000035936	Aldh5a1	0.0529833	0.0737259	0.0589223	0.0236879	0.151	0.11	1	0	SFARI;EAGLE		Limited	2.35	Discordant	1	1
ENSMUSG00000027550	Lrrcc1	0.0530137	0.0542844	0.0799075	0.0139396	0.206	0.164667	1	0
ENSMUSG00000029291	Rufy3	0.0530534	0.0548858	0.0812788	0.0286171	0.607	0.557667	1	0
ENSMUSG00000106218	Gm43713	0.0532683	0.0434572	0.0831981	0.0143316	0.212	0.170333	1	0
ENSMUSG00000033021	Gmppa	0.0534273	0.0791826	0.048506	0.0156029	0.109	0.0733333	1	0
ENSMUSG00000026141	Col19a1	0.0534799	0.0518559	-0.0794551	0.0143129	0.103	0.137667	1	0
ENSMUSG00000022201	Zfr	0.0535135	0.0377832	0.0912866	0.0143023	0.831	0.803667	1	0
ENSMUSG00000071359	Tbpl1	0.0535152	0.0493458	0.0447723	0.00904779	0.103	0.0716667	1	0
ENSMUSG00000030592	Ryr1	0.0535315	0.029723	0.115919	0.0131304	0.407	0.37	1	0
ENSMUSG00000030209	Grin2b	0.0535415	0.0533136	0.0593541	0.0127404	1	0.999667	1	0	SFARI;EAGLE;TADA	2.49e-09	Definitive	29.65	Concordant	1	0
ENSMUSG00000028618	Tmem59	0.0536708	0.0520086	0.0936916	0.0162009	0.396	0.348667	1	0
ENSMUSG00000044308	Ubr3	0.0537337	0.044332	0.0946771	0.0150552	0.784	0.796	1	0
ENSMUSG00000028578	Caap1	0.0537474	0.0448256	-0.0821021	0.0183724	0.21	0.255333	1	0
ENSMUSG00000020918	Kat2a	0.0539496	0.0682116	0.0480308	0.0139036	0.104	0.0706667	1	0
ENSMUSG00000085169	Gm10785	0.0540208	0.0245472	0.0718837	0.0079899	0.246	0.202333	1	0
ENSMUSG00000045257	Morn2	0.0541412	0.0655623	0.0531511	0.0165183	0.131	0.093	1	0
ENSMUSG00000028274	Rngtt	0.0545159	0.0220013	-0.073063	0.011826	0.432	0.483333	1	0
ENSMUSG00000022982	Sod1	0.0547589	0.0187442	0.0510712	0.0101039	0.178	0.139333	1	0	SFARI					2	0
ENSMUSG00000048758	Rpl29	0.0548215	0.0816446	0.0621088	0.0193887	0.171	0.127667	1	0
ENSMUSG00000028098	Rnf115	0.0548552	0.0706483	0.0653101	0.0173896	0.232	0.184333	1	0
ENSMUSG00000040820	Hlcs	0.0551817	0.033194	-0.060505	0.00980273	0.274	0.322667	1	0
ENSMUSG00000112663	C630031E19Rik	0.0552959	0.0471332	-0.0476003	0.00975763	0.079	0.111333	1	0
ENSMUSG00000034158	Lrrc58	0.055388	0.029715	-0.0484481	0.00417515	0.113	0.149	1	0
ENSMUSG00000054555	Adam12	0.0554434	0.0452486	0.0763743	0.0132681	0.24	0.194	1	0
ENSMUSG00000061665	Cd2ap	0.0554805	0.0229765	-0.087894	0.00976114	0.431	0.467667	1	0
ENSMUSG00000028278	Rragd	0.0555087	0.0833269	0.0831954	0.0242149	0.206	0.159667	1	0
ENSMUSG00000028412	Slc44a1	0.0555875	0.0401186	-0.078141	0.0264842	0.36	0.415667	1	0
ENSMUSG00000040452	Cdh12	0.0556551	0.0247986	-0.0807559	0.00611844	0.39	0.444	1	0
ENSMUSG00000032745	Gpbp1	0.0557733	0.0622491	-0.0639626	0.0162786	0.144	0.186	1	0
ENSMUSG00000051934	Spats2	0.0558811	0.0779801	0.0725342	0.0232985	0.216	0.17	1	0
ENSMUSG00000039153	Runx2	0.0562152	0.0249555	-0.0629291	0.00304921	0.128	0.165	1	0
ENSMUSG00000027823	Gmps	0.0562209	0.0641535	0.0731675	0.0159243	0.174	0.133667	1	0
ENSMUSG00000028964	Park7	0.0562813	0.077889	0.0514589	0.0169439	0.113	0.077	1	0
ENSMUSG00000042766	Trim46	0.0563814	0.00883717	0.0881421	0.0014427	0.416	0.369333	1	0
ENSMUSG00000028284	Map3k7	0.0569933	0.0152786	-0.0605631	0.00586474	0.257	0.306333	1	0
ENSMUSG00000042354	Gnl3	0.056996	0.0334954	0.0593981	0.00472195	0.206	0.165667	1	0
ENSMUSG00000037907	Ankrd13b	0.05719	0.0518146	0.0741559	0.016999	0.222	0.180333	1	0
ENSMUSG00000069049	Eif2s3y	0.0571974	0.05037	0.0860662	0.0205137	0.416	0.362333	1	0
ENSMUSG00000034403	Pja1	0.0572084	0.0349728	0.0468883	0.00407428	0.112	0.0806667	1	0	SFARI					3	0
ENSMUSG00000056427	Slit3	0.0572463	0.0509414	-0.0781959	0.0161874	0.938	0.958667	1	0
ENSMUSG00000026353	Ubxn4	0.0573177	0.0464861	0.0730611	0.0226408	0.297	0.245	1	0
ENSMUSG00000026490	Cdc42bpa	0.0576246	0.0235296	-0.0698139	0.00569705	0.863	0.882333	1	0
ENSMUSG00000029221	Slc30a9	0.0577297	0.0541388	-0.0684121	0.0208143	0.256	0.306	1	0
ENSMUSG00000018334	Ksr1	0.0579289	0.0607571	0.0605086	0.0242829	0.209	0.162	1	0
ENSMUSG00000018326	Ywhab	0.0579303	0.016242	0.0656656	0.00335902	0.271	0.226333	1	0
ENSMUSG00000030590	Fam98c	0.0581956	0.0936852	0.052714	0.0238183	0.134	0.091	1	0	SFARI					2	0
ENSMUSG00000032340	Neo1	0.0582185	0.0888765	0.0969048	0.0245013	0.437	0.378667	1	0	SFARI					2	0
ENSMUSG00000027603	Ggt7	0.0582964	0.0127485	0.0785051	0.00370257	0.216	0.178667	1	0
ENSMUSG00000013150	Gfod2	0.0583181	0.0408792	0.106562	0.00902925	0.106	0.0753333	1	0
ENSMUSG00000028289	Epha7	0.0583467	0.0607067	-0.121486	0.0113251	0.663	0.701	1	0
ENSMUSG00000084904	Gm14827	0.0583757	0.00698099	0.0529497	0.00192616	0.125	0.0936667	1	0
ENSMUSG00000093436	Gm20646	0.0585401	0.027414	-0.0536082	0.00828292	0.104	0.138	1	0
ENSMUSG00000058076	Sdhc	0.0586476	0.0566701	0.0599735	0.0156313	0.16	0.121667	1	0
ENSMUSG00000067336	Bmpr2	0.0586955	0.0365344	0.107529	0.0087874	0.482	0.440333	1	0
ENSMUSG00000039913	Pak5	0.0587586	0.0405317	-0.0886489	0.0209416	0.403	0.451667	1	0
ENSMUSG00000036707	Cab39	0.0590402	0.0599061	-0.0628595	0.00876622	0.226	0.273667	1	0
ENSMUSG00000035027	Map2k2	0.0591438	0.0339654	0.0624874	0.012056	0.2	0.159667	1	0
ENSMUSG00000042256	Ptchd4	0.059386	0.0763134	0.0681148	0.0365747	0.494	0.430333	1	0
ENSMUSG00000025905	Oprk1	0.0594133	0.0487686	0.0689345	0.0140239	0.215	0.173333	1	0
ENSMUSG00000019820	Utrn	0.0594365	0.0655378	-0.0892043	0.0317414	0.518	0.568	1	0
ENSMUSG00000074657	Kif5a	0.0595522	0.0355036	0.0584198	0.00841579	0.274	0.228333	1	0
ENSMUSG00000048280	Zfp738	0.059704	0.0459459	-0.0484826	0.0142957	0.106	0.142	1	0
ENSMUSG00000026484	Rnf2	0.0598449	0.0517334	0.0424627	0.0108885	0.104	0.0736667	1	0
ENSMUSG00000078137	Ankrd63	0.0598763	0.0393828	0.047379	0.00695135	0.126	0.0936667	1	0
ENSMUSG00000022212	Cpne6	0.0599077	0.0397793	0.0352515	0.00999475	0.116	0.0836667	1	0
ENSMUSG00000047712	Ust	0.0599475	0.017637	-0.0793478	0.00772191	0.369	0.417	1	0
ENSMUSG00000046516	Cox17	0.0600944	0.0893635	0.048506	0.0156029	0.104	0.0706667	1	0
ENSMUSG00000019370	Calm3	0.0601733	0.0196946	0.0464557	0.0048838	0.122	0.0906667	1	0
ENSMUSG00000073434	Wdr90	0.0601792	0.033757	0.0431077	0.0022301	0.121	0.0883333	1	0
ENSMUSG00000023571	C1qtnf12	0.0603221	0.0660188	0.0595478	0.0191196	0.169	0.129	1	0
ENSMUSG00000029993	Nfu1	0.0606362	0.0501515	0.0412013	0.00816353	0.109	0.0776667	1	0
ENSMUSG00000010136	Pifo	0.0608389	0.0524106	0.067158	0.00830406	0.176	0.138667	1	0
ENSMUSG00000029657	Hsph1	0.0608748	0.0744895	0.086708	0.0293662	0.313	0.260667	1	0
ENSMUSG00000030869	Ndufab1	0.0609445	0.047793	0.0410275	0.0072795	0.129	0.094	1	0
ENSMUSG00000073274	Gm14636	0.0609468	0.0516354	0.0689369	0.0129227	0.172	0.135333	1	0
ENSMUSG00000052837	Junb	0.0609854	0.0262492	0.106701	0.0111792	0.222	0.184667	1	0
ENSMUSG00000071369	Map3k5	0.0610778	0.0623722	0.0820504	0.0217301	0.326	0.276	1	0
ENSMUSG00000026771	Spopl	0.0611323	0.00913995	-0.0741587	0.00407211	0.26	0.302667	1	0
ENSMUSG00000036815	Dpp10	0.061291	0.0600428	-0.0783939	0.0266537	0.537	0.615	1	0	SFARI					2	0
ENSMUSG00000085181	Gm12709	0.0613978	0.0808841	0.0570734	0.0135406	0.121	0.086	1	0
ENSMUSG00000027193	Api5	0.0614604	0.0206705	0.0529234	0.00603732	0.153	0.118333	1	0
ENSMUSG00000068740	Celsr2	0.0615553	0.0353524	0.0613308	0.0055276	0.178	0.141667	1	0
ENSMUSG00000030774	Pak1	0.0616675	0.0159463	-0.0540278	0.0104311	0.159	0.198667	1	0	SFARI						1
ENSMUSG00000040563	Plppr2	0.0617749	0.0823344	0.0513557	0.0193887	0.163	0.123	1	0
ENSMUSG00000030061	Uba3	0.0618164	0.0452127	0.0574597	0.0127518	0.162	0.124667	1	0
ENSMUSG00000020023	Tmcc3	0.0619475	0.0935233	-0.060745	0.023024	0.134	0.179333	1	0
ENSMUSG00000020309	Chac2	0.061998	0.0543944	0.0420254	0.0202701	0.124	0.0866667	1	0
ENSMUSG00000035900	Gramd4	0.0620562	0.0729995	0.0742445	0.0158799	0.172	0.132	1	0	EAGLE		No scorable evidence	0	Concordant
ENSMUSG00000029647	Pan3	0.0622167	0.0811649	-0.111122	0.0252806	0.568	0.609667	1	0
ENSMUSG00000021051	Ppp2r5e	0.0623706	0.0264826	-0.0690031	0.00780295	0.432	0.475333	1	0
ENSMUSG00000059326	Csf2ra	0.0623891	0.055144	0.0762035	0.0221114	0.181	0.140667	1	0
ENSMUSG00000050587	Lrrc4c	0.0624163	0.0409257	-0.0814731	0.0217803	0.997	0.999333	1	0	SFARI;EAGLE		Limited	1.25	Discordant	1	0
ENSMUSG00000039230	Tbcd	0.0625979	0.0986232	-0.0791691	0.0289964	0.196	0.247	1	0
ENSMUSG00000058546	Rpl23a	0.0627803	0.0351803	0.0461888	0.0061089	0.14	0.105667	1	0
ENSMUSG00000029076	Sdf4	0.062856	0.0481999	0.0687406	0.0135494	0.162	0.125333	1	0
ENSMUSG00000031839	Hsbp1	0.0633411	0.0485012	0.0470246	0.0079312	0.109	0.0783333	1	0
ENSMUSG00000010517	Faf1	0.06341	0.0539815	-0.0813154	0.028444	0.744	0.788667	1	0
ENSMUSG00000032366	Tpm1	0.0636077	0.0730205	0.0904533	0.0194755	0.41	0.361333	1	0
ENSMUSG00000037243	Zfp692	0.0636152	0.0372847	0.0571723	0.00996651	0.251	0.207333	1	0
ENSMUSG00000031290	Lrch2	0.0638538	0.00573931	-0.0692656	0.00468845	0.304	0.35	1	0
ENSMUSG00000033065	Pfkm	0.0640863	0.0336783	0.0599608	0.0117699	0.219	0.179	1	0
ENSMUSG00000004110	Cacna1e	0.0641827	0.0558188	0.0601089	0.0201213	0.985	0.977	1	0	SFARI					1	0
ENSMUSG00000049504	Proser1	0.0643698	0.0583087	0.0481539	0.0160562	0.153	0.116333	1	0
ENSMUSG00000049122	Frmd3	0.0646106	0.0432497	-0.0490477	0.014542	0.197	0.243	1	0
ENSMUSG00000000355	Mcts1	0.0647117	0.0739246	0.0870659	0.0152009	0.297	0.252333	1	0
ENSMUSG00000097330	Gm26672	0.0648289	0.0905643	0.0865808	0.0229982	0.296	0.244	1	0
ENSMUSG00000031708	Tecr	0.064862	0.0682243	0.0802576	0.0234942	0.379	0.333	1	0
ENSMUSG00000062444	Ap3b2	0.0649417	0.076498	0.0683414	0.0167557	0.259	0.213	1	0
ENSMUSG00000036339	Tmem260	0.065053	0.0593643	-0.0573915	0.0251888	0.2	0.251	1	0
ENSMUSG00000021646	Mccc2	0.065109	0.0546533	0.0493507	0.00741667	0.172	0.133	1	0
ENSMUSG00000085030	2810455O05Rik	0.0653868	0.0557601	0.0514342	0.0184083	0.1	0.0676667	1	0
ENSMUSG00000029136	Rbks	0.0655215	0.051679	-0.0377806	0.00666293	0.082	0.114	1	0
ENSMUSG00000020387	Jade2	0.0657199	0.0580926	0.0552604	0.0115618	0.132	0.0993333	1	0
ENSMUSG00000084947	Gm15594	0.0659624	0.0409458	0.0534363	0.0108211	0.285	0.236667	1	0
ENSMUSG00000022263	Trio	0.0660743	0.0289329	-0.0843454	0.0120051	0.715	0.737333	1	0	SFARI					1	0
ENSMUSG00000038291	Snx25	0.0664921	0.0675965	-0.0847333	0.0182318	0.4	0.448	1	0
ENSMUSG00000038462	Uqcrfs1	0.0666117	0.0576866	0.0419728	0.00967352	0.103	0.0736667	1	0
ENSMUSG00000042216	Sgsm1	0.0666365	0.05744	-0.0699406	0.032146	0.238	0.290333	1	0
ENSMUSG00000024112	Cacna1h	0.0666637	0.0226244	0.0473391	0.00825021	0.3	0.253667	1	0	SFARI					2	0
ENSMUSG00000030741	Spns1	0.0667516	0.0295808	0.0470899	0.00576794	0.147	0.113333	1	0
ENSMUSG00000060679	Mrps9	0.0668179	0.0621999	-0.0597762	0.0268114	0.299	0.356333	1	0
ENSMUSG00000028229	Rmdn1	0.0669458	0.059896	-0.0918587	0.0217051	0.493	0.543	1	0
ENSMUSG00000035934	Pknox2	0.0669712	0.035056	-0.0855376	0.0151915	0.353	0.396667	1	0
ENSMUSG00000042104	Uggt2	0.0672652	0.0576345	-0.100353	0.0256484	0.428	0.47	1	0
ENSMUSG00000036218	Pdzrn4	0.0673152	0.0431709	-0.0891072	0.0103916	0.299	0.344333	1	0
ENSMUSG00000026554	Dcaf8	0.067326	0.03741	0.0585542	0.00295894	0.257	0.214	1	0
ENSMUSG00000037148	Arhgap10	0.0673676	0.0206824	-0.0874871	0.00510962	0.79	0.806667	1	0
ENSMUSG00000078622	Ccdc47	0.0674472	0.0695506	0.0745654	0.00986908	0.251	0.208667	1	0
ENSMUSG00000055717	Slain1	0.067448	0.0534069	-0.092297	0.0113942	0.169	0.208	1	0
ENSMUSG00000004319	Clcn3	0.0674501	0.0462414	-0.0732948	0.0165222	0.393	0.442667	1	0
ENSMUSG00000001151	Pcnt	0.0675095	0.0544979	0.0439388	0.00968669	0.101	0.0726667	1	0
ENSMUSG00000050708	Ftl1	0.0677882	0.0420049	0.0464731	0.00996783	0.118	0.0866667	1	0
ENSMUSG00000049511	Htr1b	0.0680554	0.0820031	0.0532305	0.0165856	0.247	0.199	1	0	SFARI					2	0
ENSMUSG00000008475	Arpc5	0.0681711	0.055927	0.0321415	0.00708729	0.146	0.109	1	0
ENSMUSG00000022514	Il1rap	0.0684894	0.0130938	-0.0481189	0.00567993	0.076	0.104333	1	0
ENSMUSG00000023055	Calcoco1	0.0685564	0.111826	0.0799867	0.026941	0.266	0.213667	1	0
ENSMUSG00000057236	Rbbp4	0.0688006	0.0323038	0.0609811	0.0075296	0.241	0.2	1	0
ENSMUSG00000021066	Atl1	0.0688324	0.0278984	0.0708367	0.00960501	0.382	0.334667	1	0
ENSMUSG00000047976	Kcna1	0.0689291	0.102099	0.0856702	0.0336003	0.341	0.287333	1	0
ENSMUSG00000015501	Hivep2	0.0689469	0.0790971	-0.0804637	0.0234468	0.971	0.974667	1	0	SFARI					1	1
ENSMUSG00000036890	Gtdc1	0.0691236	0.0670325	-0.0576115	0.0145858	0.34	0.395667	1	0
ENSMUSG00000046169	Adamts6	0.0692858	0.0988901	0.0479085	0.0148964	0.1	0.068	1	0
ENSMUSG00000032959	Pebp1	0.0693519	0.0080451	0.0565925	0.00623928	0.191	0.153667	1	0
ENSMUSG00000041658	Rragb	0.0694279	0.0421935	-0.0570774	0.00780432	0.154	0.193	1	0
ENSMUSG00000024064	Galnt14	0.069489	0.028653	-0.0526602	0.00367193	0.135	0.171	1	0	SFARI					2	0
ENSMUSG00000025086	Trub1	0.0694944	0.0505648	0.034431	0.00800266	0.172	0.133	1	0
ENSMUSG00000024082	Ndufaf7	0.0695296	0.0783701	0.0987323	0.0274345	0.294	0.251	1	0
ENSMUSG00000104206	Gm32250	0.0696568	0.086713	0.0650989	0.0118799	0.115	0.083	1	0
ENSMUSG00000053477	Tcf4	0.0698442	0.0511556	-0.106945	0.0064639	0.204	0.245667	1	0	SFARI;EAGLE;TADA	0.00271594	Definitive	13.5	Concordant	1	1
ENSMUSG00000024908	Ppp6r3	0.0699722	0.00852383	-0.0634177	0.0030524	0.307	0.351	1	0
ENSMUSG00000022139	Mbnl2	0.0701859	0.045299	-0.0773094	0.0196631	0.901	0.901667	1	0
ENSMUSG00000074884	Serf2	0.0705852	0.0917227	0.0445826	0.0175258	0.122	0.0883333	1	0
ENSMUSG00000059586	Nsmce2	0.0707089	0.073373	-0.0555676	0.0295252	0.425	0.486667	1	0
ENSMUSG00000002900	Lamb1	0.070715	0.0784765	0.0619616	0.0111403	0.178	0.14	1	0	SFARI					2	0
ENSMUSG00000021709	Erbin	0.0707415	0.118306	-0.138174	0.0500162	0.379	0.437333	1	0	SFARI					2	0
ENSMUSG00000033009	Ogfod1	0.0710338	0.0491909	0.0542808	0.0120203	0.197	0.157667	1	0
ENSMUSG00000054280	Prr14l	0.0711384	0.0217793	0.0365758	0.00582478	0.266	0.221333	1	0	TADA	0.0546925
ENSMUSG00000022142	Nup155	0.0711388	0.0655004	0.049691	0.00775194	0.134	0.101333	1	0	SFARI;EAGLE;TADA	0.0596512	Limited	0.1	Discordant	1	0
ENSMUSG00000112201	4930532I03Rik	0.0711683	0.0247864	-0.0522568	0.00636045	0.116	0.149	1	0
ENSMUSG00000098973	Mir6236	0.0714334	0.0318617	0.143751	0.0174445	0.828	0.813667	1	0
ENSMUSG00000028898	Trnau1ap	0.0716739	0.0598271	0.0592889	0.0162348	0.128	0.0933333	1	0
ENSMUSG00000059708	Akap17b	0.0717237	0.0588119	0.0664991	0.0205961	0.226	0.183333	1	0
ENSMUSG00000039275	Foxk2	0.0718607	0.0843737	-0.0622131	0.0246524	0.256	0.304	1	0
ENSMUSG00000020547	Bzw2	0.0718627	0.0496583	0.0609912	0.0150452	0.322	0.275333	1	0
ENSMUSG00000110230	Gm45846	0.0719695	0.0367379	-0.0571347	0.0063075	0.141	0.177	1	0
ENSMUSG00000030584	Dpf1	0.0720251	0.0727279	0.0440776	0.00984686	0.163	0.126	1	0
ENSMUSG00000017778	Cox7c	0.0723551	0.053767	0.069315	0.0150537	0.321	0.274333	1	0
ENSMUSG00000021259	Cyp46a1	0.0725731	0.0562139	0.0744963	0.0192943	0.347	0.302	1	0
ENSMUSG00000041624	Gucy1a2	0.0726335	0.0497344	-0.0856335	0.0185612	0.719	0.755	1	0	SFARI					2	0
ENSMUSG00000020135	Apc2	0.0726512	0.101731	0.0527704	0.0145251	0.125	0.0906667	1	0
ENSMUSG00000042207	Kdm5b	0.0726999	0.0429355	0.0670724	0.0100272	0.412	0.363667	1	0	SFARI;EAGLE;TADA	2.06e-12	Limited	2.8	Discordant	1	0
ENSMUSG00000037646	Vps13b	0.0727045	0.086603	-0.0824924	0.0159625	0.841	0.873	1	0	SFARI;EAGLE		Moderate	6.35	Discordant	1	1
ENSMUSG00000058997	Vwa8	0.0727093	0.0370818	-0.0651516	0.010782	0.363	0.408667	1	0
ENSMUSG00000021458	Aopep	0.0728141	0.108857	-0.0870077	0.0325883	0.587	0.639667	1	0
ENSMUSG00000022490	Ppp1r1a	0.0729259	0.0387022	0.075537	0.00939196	0.265	0.225	1	0
ENSMUSG00000038095	Sbno1	0.0729463	0.0644727	0.0856265	0.0160575	0.513	0.467	1	0
ENSMUSG00000006333	Rps9	0.072971	0.11537	0.0583208	0.0214135	0.115	0.0783333	1	0
ENSMUSG00000091337	Eid1	0.0730209	0.049652	-0.0413955	0.00739134	0.109	0.143333	1	0
ENSMUSG00000025986	Slc39a10	0.0730673	0.0293578	-0.0565273	0.00790286	0.249	0.292333	1	0
ENSMUSG00000028234	Rps20	0.0731071	0.0701632	0.0570142	0.0194398	0.132	0.0983333	1	0
ENSMUSG00000024008	Cpne5	0.0734833	0.0475886	0.0695545	0.0107796	0.597	0.556333	1	0
ENSMUSG00000042472	Zfp410	0.073512	0.0427282	0.0567713	0.00893297	0.144	0.111333	1	0
ENSMUSG00000056296	Synpr	0.073535	0.0826304	-0.0846626	0.0363693	0.344	0.396667	1	0
ENSMUSG00000071252	2210408I21Rik	0.0736245	0.0621923	-0.100986	0.0348839	0.409	0.448333	1	0
ENSMUSG00000022762	Ncam2	0.0737235	0.064885	-0.0906759	0.0322673	0.937	0.945	1	0
ENSMUSG00000041702	Btbd7	0.0738592	0.0704829	-0.0875813	0.0155443	0.338	0.378333	1	0
ENSMUSG00000021262	Evl	0.0744489	0.0673938	-0.0927849	0.0164607	0.397	0.437	1	0
ENSMUSG00000006307	Kmt2b	0.0749045	0.0690363	0.0526347	0.0207274	0.14	0.104	1	0
ENSMUSG00000072294	Klf12	0.0750522	0.0719759	-0.0834956	0.0260061	0.494	0.534	1	0
ENSMUSG00000011589	Fsd1	0.0752041	0.111379	0.0465363	0.0155817	0.11	0.077	1	0
ENSMUSG00000045983	Eif4g1	0.0752797	0.071231	0.0631936	0.0101959	0.265	0.222333	1	0	SFARI					3	0
ENSMUSG00000022433	Csnk1e	0.0753534	0.0684094	0.0430237	0.0148296	0.11	0.0796667	1	0	SFARI					2	0
ENSMUSG00000021713	Ppwd1	0.0753577	0.113545	0.048523	0.0277563	0.26	0.207667	1	0
ENSMUSG00000031529	Tnks	0.0755983	0.121944	-0.0915891	0.0412071	0.393	0.45	1	0
ENSMUSG00000005034	Prkacb	0.076046	0.0395139	-0.0406444	0.0114593	0.479	0.542667	1	0
ENSMUSG00000030161	Gabarapl1	0.0761203	0.053675	0.0563501	0.0121823	0.232	0.192333	1	0
ENSMUSG00000059173	Pde1a	0.0761916	0.0678927	0.145743	0.0492814	0.299	0.249667	1	0
ENSMUSG00000059208	Hnrnpm	0.0762406	0.0597175	0.0728628	0.0208498	0.604	0.543	1	0
ENSMUSG00000020954	Strn3	0.0763222	0.0559943	-0.0814038	0.0188938	0.738	0.771	1	0
ENSMUSG00000024044	Epb41l3	0.0764348	0.0834918	-0.0764977	0.020063	0.593	0.633333	1	0
ENSMUSG00000031791	Tmem38a	0.0764574	0.0647727	0.0505322	0.0110869	0.221	0.178333	1	0
ENSMUSG00000027405	Nop56	0.076486	0.0831383	0.0554181	0.0202231	0.191	0.15	1	0
ENSMUSG00000019087	Atp6ap1	0.0765508	0.0661797	0.0372762	0.0124015	0.182	0.143333	1	0
ENSMUSG00000015944	Castor2	0.0766301	0.10607	-0.0554765	0.0234647	0.101	0.137333	1	0
ENSMUSG00000029804	Herc3	0.0766343	0.0828321	-0.0781567	0.0218726	0.221	0.264667	1	0
ENSMUSG00000021576	Pdcd6	0.076736	0.0399878	0.0578718	0.00606355	0.147	0.114667	1	0
ENSMUSG00000040365	Trim41	0.0769038	0.0476715	0.0431482	0.0100885	0.138	0.105333	1	0
ENSMUSG00000035064	Eef2k	0.0770215	0.0522541	0.0468311	0.00629397	0.106	0.0773333	1	0
ENSMUSG00000001227	Sema6b	0.077068	0.0467668	0.0435119	0.00405903	0.109	0.08	1	0
ENSMUSG00000061559	Wdr61	0.0772601	0.0512815	0.0480791	0.00853486	0.112	0.0823333	1	0
ENSMUSG00000020267	Hint1	0.0773109	0.0479342	0.0579477	0.00485015	0.122	0.0923333	1	0
ENSMUSG00000050856	Atp5k	0.0774115	0.0625221	0.0502072	0.00963557	0.179	0.142667	1	0
ENSMUSG00000025420	Katnal2	0.0774487	0.0450989	0.04469	0.00482437	0.125	0.0943333	1	0	SFARI;EAGLE		Limited	4.1	Discordant	1	0
ENSMUSG00000021939	Ctsb	0.077614	0.0572357	0.0728742	0.0101216	0.243	0.203	1	0
ENSMUSG00000026933	Camsap1	0.0777128	0.0539112	0.0536564	0.014704	0.304	0.257667	1	0
ENSMUSG00000010914	Pdhx	0.0777324	0.106545	-0.0628934	0.0196271	0.096	0.13	1	0
ENSMUSG00000036438	Calm2	0.0780518	0.0627412	0.0931386	0.0248581	0.799	0.794333	1	0
ENSMUSG00000020863	Luc7l3	0.0780735	0.0297857	0.0584307	0.0101873	0.522	0.468	1	0
ENSMUSG00000024012	Mtch1	0.0782182	0.0734924	0.0676688	0.0113973	0.282	0.238	1	0
ENSMUSG00000015568	Lpl	0.0783857	0.0497191	0.0588514	0.0061684	0.129	0.099	1	0
ENSMUSG00000038128	Camk4	0.0785327	0.104408	-0.0849042	0.0355773	0.954	0.956333	1	0	SFARI					2	0
ENSMUSG00000069808	Tlcd3a	0.078593	0.047332	0.0441382	0.011549	0.14	0.107333	1	0
ENSMUSG00000039156	Stim2	0.0787858	0.0728161	-0.0615063	0.0249384	0.316	0.368667	1	0
ENSMUSG00000026926	Pmpca	0.0789247	0.0644396	0.0679456	0.0134168	0.128	0.0953333	1	0
ENSMUSG00000058444	Map2k5	0.0791902	0.0965485	-0.0804982	0.0243506	0.322	0.368667	1	0
ENSMUSG00000015748	Prpf3	0.0792761	0.0546571	0.0391215	0.00824942	0.265	0.219333	1	0
ENSMUSG00000039683	Sdk1	0.0793313	0.0290723	0.0699559	0.00823316	0.103	0.0766667	1	0
ENSMUSG00000037742	Eef1a1	0.079372	0.122114	0.10153	0.0385936	0.406	0.359	1	0
ENSMUSG00000021189	Atxn3	0.0800433	0.0611344	0.0616535	0.0128822	0.247	0.206667	1	0
ENSMUSG00000040268	Plekha1	0.0802248	0.0377639	-0.0716908	0.00777194	0.237	0.276333	1	0
ENSMUSG00000002763	Pex6	0.080581	0.0345056	0.0389442	0.0034207	0.1	0.073	1	0
ENSMUSG00000042590	Ipo11	0.0806586	0.0773264	0.0492942	0.0254019	0.437	0.380667	1	0
ENSMUSG00000022119	Rbm26	0.0807378	0.0861115	0.100239	0.0182227	0.728	0.711667	1	0
ENSMUSG00000028456	Unc13b	0.0807736	0.0251613	0.0287626	0.00578308	0.131	0.0993333	1	0
ENSMUSG00000020740	Gga3	0.080956	0.0361167	0.0645974	0.00914366	0.184	0.149	1	0
ENSMUSG00000023088	Abcc1	0.0810699	0.0116647	0.0644452	0.00470864	0.207	0.172667	1	0
ENSMUSG00000019254	Ppp1r12c	0.0811438	0.0295172	0.0627077	0.00945467	0.249	0.210333	1	0
ENSMUSG00000026032	Ndufb3	0.0812952	0.069436	0.0595935	0.0156314	0.204	0.164667	1	0
ENSMUSG00000006021	Kptn	0.08133	0.0416595	0.0534925	0.00597758	0.159	0.125333	1	0	SFARI						1
ENSMUSG00000039629	Strip2	0.0815619	0.1182	0.0951192	0.0327498	0.519	0.476333	1	0
ENSMUSG00000114797	Gm49336	0.08157	0.0948546	-0.0370092	0.0197088	0.099	0.135	1	0
ENSMUSG00000029017	Pmpcb	0.0817306	0.0520549	0.0445302	0.00858145	0.107	0.0786667	1	0
ENSMUSG00000041130	Zfp598	0.0818222	0.0738842	0.0508738	0.0205572	0.163	0.125	1	0
ENSMUSG00000026585	Kifap3	0.0820298	0.0699444	0.0525539	0.0238766	0.706	0.664	1	0
ENSMUSG00000048826	Dact2	0.0822263	0.0464137	0.0427305	0.00884938	0.132	0.101333	1	0
ENSMUSG00000029458	Brap	0.0822295	0.0359331	0.0469271	0.00214675	0.165	0.130667	1	0
ENSMUSG00000031012	Cask	0.0823072	0.133374	-0.102428	0.0414107	0.547	0.610667	1	0	SFARI					1	0
ENSMUSG00000035967	Ints6l	0.0824027	0.0974454	0.0928357	0.0262716	0.441	0.398	1	0
ENSMUSG00000084890	A830036E02Rik	0.08251	0.105154	0.0601976	0.0209989	0.163	0.125	1	0
ENSMUSG00000018537	Pcgf2	0.0826481	0.0917623	0.0431967	0.00829431	0.135	0.102333	1	0
ENSMUSG00000090291	Lrrc10b	0.0826765	0.0553068	0.0478828	0.00949483	0.171	0.135667	1	0
ENSMUSG00000086370	Ftx	0.082774	0.0758191	0.064435	0.0132157	0.675	0.635	1	0
ENSMUSG00000067973	Gm6994	0.0828111	0.0359537	-0.0611189	0.00527126	0.154	0.190667	1	0
ENSMUSG00000030795	Fus	0.0828636	0.0596764	0.0725523	0.0264769	0.722	0.679	1	0
ENSMUSG00000038024	Dennd4c	0.0829006	0.0535987	-0.0619603	0.0177713	0.265	0.309	1	0
ENSMUSG00000054051	Ercc6	0.0832229	0.058916	-0.0584576	0.0121968	0.226	0.268	1	0
ENSMUSG00000029167	Ppargc1a	0.083346	0.0954087	-0.0776363	0.0223846	0.263	0.308333	1	0
ENSMUSG00000078784	Rbis	0.0833893	0.0249322	0.0365421	0.00110543	0.129	0.099	1	0
ENSMUSG00000025266	Gnl3l	0.0834355	0.0272082	0.0566963	0.00265057	0.232	0.194333	1	0
ENSMUSG00000039367	Sec24c	0.0835325	0.106844	0.0540546	0.0129144	0.122	0.09	1	0
ENSMUSG00000026090	Cracdl	0.0837122	0.106914	0.119295	0.0268163	0.778	0.752667	1	0
ENSMUSG00000038884	Shfl	0.0837873	0.0960453	0.0729217	0.0235858	0.271	0.228	1	0
ENSMUSG00000024906	Mus81	0.0837979	0.0454482	0.0489203	0.00680466	0.115	0.0863333	1	0
ENSMUSG00000108532	Gm32647	0.0838002	0.079582	-0.0203941	0.109863	0.494	0.431333	1	0
ENSMUSG00000029998	Pcyox1	0.0842242	0.122676	0.0485096	0.0161021	0.104	0.0706667	1	0
ENSMUSG00000027820	Mme	0.0844205	0.0874057	-0.099912	0.0112923	0.284	0.322333	1	0
ENSMUSG00000025959	Klf7	0.0845023	0.0347102	-0.0658313	0.00669581	0.296	0.336667	1	0	SFARI					3	0
ENSMUSG00000015120	Ube2i	0.0846194	0.0515587	0.0536959	0.0105024	0.137	0.105667	1	0
ENSMUSG00000013858	Tmem259	0.0847937	0.0454793	0.0646286	0.00499191	0.149	0.117333	1	0
ENSMUSG00000033732	Sf3b3	0.0848138	0.0406836	-0.0616614	0.00418006	0.203	0.240333	1	0
ENSMUSG00000021285	Ppp1r13b	0.0849272	0.0368367	0.0697214	0.015556	0.449	0.400333	1	0
ENSMUSG00000090120	A730090N16Rik	0.085084	0.0924783	-0.0511146	0.0153526	0.146	0.185667	1	0
ENSMUSG00000024502	Jakmip2	0.0851835	0.0633975	-0.0812582	0.0194685	0.571	0.606333	1	0
ENSMUSG00000026526	Fh1	0.0857665	0.0916829	0.0401109	0.00818064	0.106	0.077	1	0
ENSMUSG00000029071	Dvl1	0.0858198	0.113721	0.0659776	0.0257244	0.218	0.175	1	0
ENSMUSG00000031608	Galnt7	0.0859242	0.0785904	-0.0607165	0.0182	0.106	0.139	1	0
ENSMUSG00000032177	Pde4a	0.0862288	0.0167562	0.058002	0.00502929	0.391	0.344333	1	0
ENSMUSG00000020111	Micu1	0.0863469	0.0378005	-0.0625717	0.0137725	0.384	0.427667	1	0
ENSMUSG00000026657	Frmd4a	0.0864147	0.0820859	-0.0763107	0.0144289	0.737	0.776667	1	0
ENSMUSG00000030994	D7Ertd443e	0.0865392	0.039546	-0.0689269	0.0118095	0.159	0.194	1	0
ENSMUSG00000028476	Reck	0.0865829	0.0139111	0.0440709	0.0031022	0.197	0.160333	1	0
ENSMUSG00000027884	Clcc1	0.0865921	0.0989236	0.0452423	0.0178676	0.107	0.076	1	0
ENSMUSG00000020070	Rufy2	0.0866748	0.0265529	0.0856585	0.0146648	0.399	0.360333	1	0
ENSMUSG00000026312	Cdh7	0.0867474	0.118968	0.118646	0.0412613	0.416	0.362667	1	0
ENSMUSG00000030102	Itpr1	0.086841	0.08231	-0.0860553	0.028029	0.956	0.962667	1	0	SFARI					2	0
ENSMUSG00000031841	Cdh13	0.0869329	0.054697	-0.105127	0.0232866	0.54	0.573	1	0	SFARI					2	0
ENSMUSG00000028538	St3gal3	0.087107	0.0654949	-0.0629278	0.0110015	0.204	0.242667	1	0
ENSMUSG00000033379	Atp6v0b	0.0872207	0.0665613	-0.060867	0.0178803	0.79	0.83	1	0
ENSMUSG00000071662	Polr2g	0.0875402	0.039886	0.0408717	0.00862141	0.129	0.0996667	1	0
ENSMUSG00000006191	Cdkal1	0.0876935	0.0948004	-0.086163	0.0246358	0.41	0.448333	1	0
ENSMUSG00000023011	Faim2	0.0879495	0.137917	0.0504294	0.0237333	0.149	0.106667	1	0
ENSMUSG00000029581	Fscn1	0.0881097	0.0605398	0.039462	0.00884578	0.151	0.118	1	0
ENSMUSG00000020818	Mfsd11	0.0884608	0.0650946	0.0501782	0.0102633	0.159	0.126	1	0
ENSMUSG00000021338	Carmil1	0.0884625	0.0529529	-0.0683938	0.0113624	0.209	0.246667	1	0
ENSMUSG00000057335	Cep170	0.0885696	0.0826475	-0.055904	0.0171219	0.375	0.427	1	0
ENSMUSG00000028785	Hpca	0.0886596	0.114939	0.0926317	0.0198664	0.363	0.320667	1	0
ENSMUSG00000086708	Gm15577	0.0886894	0.0744039	0.0718195	0.0140322	0.24	0.198667	1	0
ENSMUSG00000024780	Cdc37l1	0.0888018	0.0931562	-0.0717408	0.0240451	0.25	0.295667	1	0
ENSMUSG00000026842	Abl1	0.0888988	0.0751437	-0.0543755	0.0241065	0.209	0.255	1	0
ENSMUSG00000089922	Gm43517	0.0889977	0.0727918	-0.0421738	0.0190459	0.138	0.176667	1	0
ENSMUSG00000100826	Snhg14	0.0890357	0.0575995	0.0765345	0.0148342	0.99	0.991667	1	0
ENSMUSG00000027133	Nop10	0.0890542	0.0374529	0.0474823	0.00598153	0.109	0.082	1	0
ENSMUSG00000067942	Zfp160	0.0891582	0.019568	-0.0499076	0.00204654	0.138	0.172333	1	0
ENSMUSG00000019831	Wasf1	0.0891966	0.0752042	0.0695721	0.0226543	0.762	0.712667	1	0	SFARI						1
ENSMUSG00000020230	Prmt2	0.0893503	0.0539317	0.0432972	0.00917335	0.118	0.0886667	1	0
ENSMUSG00000020255	Nopchap1	0.0894155	0.0552604	-0.0608655	0.0173215	0.257	0.300667	1	0
ENSMUSG00000118030	Gm50163	0.0898664	0.0253011	0.0409704	0.00405229	0.112	0.0843333	1	0
ENSMUSG00000034040	Galnt17	0.0898884	0.149317	-0.0883619	0.0584615	0.278	0.336333	1	0
ENSMUSG00000037373	Ctbp1	0.0899629	0.086892	0.0496218	0.0157693	0.103	0.075	1	0
ENSMUSG00000029629	Phf14	0.0900703	0.0558492	-0.0725867	0.0137704	0.753	0.793333	1	0	SFARI					3	0
ENSMUSG00000049225	Pdp1	0.0900906	0.110383	-0.0235855	0.0162632	0.169	0.214	1	0
ENSMUSG00000025190	Got1	0.0901069	0.0695567	0.06163	0.00619708	0.219	0.182333	1	0
ENSMUSG00000032908	Sgpp2	0.0901787	0.0786977	-0.0672406	0.0131334	0.138	0.171667	1	0
ENSMUSG00000055866	Per2	0.0902365	0.0688202	-0.0333523	0.0190019	0.199	0.246667	1	0	SFARI;EAGLE		Moderate	6.75	Concordant	2	0
ENSMUSG00000045201	Lrrc3b	0.0902742	0.0305994	-0.0699276	0.00605089	0.219	0.255	1	0
ENSMUSG00000104960	Snhg8	0.0902761	0.0538711	0.0500959	0.0067811	0.106	0.0793333	1	0
ENSMUSG00000053347	Zfp943	0.09028	0.0617471	-0.0479859	0.00642739	0.231	0.275	1	0
ENSMUSG00000035835	Plppr3	0.09051	0.0491823	0.0566897	0.00738198	0.188	0.154333	1	0
ENSMUSG00000074656	Eif2s2	0.0907187	0.090601	0.0604499	0.0118892	0.196	0.159667	1	0
ENSMUSG00000042210	Abhd14a	0.0908972	0.0501628	0.0490378	0.0038958	0.151	0.119667	1	0
ENSMUSG00000007653	Gabrb2	0.0909221	0.0356593	-0.0685126	0.0126254	0.681	0.706	1	0	SFARI;EAGLE		Limited	0.3	Discordant	1	0
ENSMUSG00000035530	Eif1	0.0909886	0.0956305	0.078749	0.029882	0.378	0.331667	1	0
ENSMUSG00000041708	Mpped1	0.0910456	0.0667926	0.0454191	0.00470557	0.141	0.109333	1	0
ENSMUSG00000045576	St7l	0.0911314	0.113717	-0.0562427	0.0268591	0.3	0.351667	1	0
ENSMUSG00000036550	Cnot1	0.0913878	0.0200644	-0.0493173	0.00376757	0.466	0.518667	1	0	SFARI					2	0
ENSMUSG00000031778	Cx3cl1	0.0917376	0.0402771	0.0532691	0.00856431	0.441	0.387667	1	0
ENSMUSG00000036352	Ubac1	0.0917821	0.108481	0.0425234	0.0195487	0.146	0.109333	1	0
ENSMUSG00000053550	Shisa7	0.0919408	0.0955962	0.0757804	0.0186901	0.303	0.259	1	0
ENSMUSG00000006711	D130043K22Rik	0.0919671	0.114749	-0.0667647	0.0292911	0.224	0.265667	1	0
ENSMUSG00000035601	Trmt10b	0.0920242	0.0249116	0.0489135	0.00408537	0.103	0.077	1	0
ENSMUSG00000025651	Uqcrc1	0.0922147	0.0692099	0.0497359	0.0152134	0.21	0.172	1	0
ENSMUSG00000062380	Tubb3	0.0923238	0.0374236	-0.0354513	0.00500359	0.2	0.241333	1	0
ENSMUSG00000019990	Pde7b	0.0923322	0.108218	-0.0783088	0.0542571	0.987	0.992333	1	0
ENSMUSG00000019710	Mrpl24	0.0923904	0.0918947	0.0411291	0.00939202	0.16	0.125667	1	0
ENSMUSG00000038685	Rtel1	0.0924363	0.11022	0.0477666	0.0127962	0.104	0.0756667	1	0
ENSMUSG00000024787	Snx15	0.0925148	0.0776023	0.0452234	0.00876006	0.131	0.1	1	0
ENSMUSG00000020728	Cep112	0.0925838	0.0600352	-0.0500175	0.016009	0.243	0.287	1	0
ENSMUSG00000074024	4632427E13Rik	0.0929105	0.146652	-0.0951703	0.0295383	0.328	0.379	1	0
ENSMUSG00000024068	Spast	0.0929615	0.079032	-0.0516507	0.0113624	0.137	0.171667	1	0	SFARI;EAGLE		Moderate	8.1	Discordant	1	0
ENSMUSG00000045318	Adra2c	0.093017	0.0738545	0.0470748	0.00832726	0.135	0.105	1	0
ENSMUSG00000033569	Adgrb3	0.0930397	0.0899631	0.0499761	0.00992966	1	1	1	0
ENSMUSG00000040479	Dgkz	0.0931598	0.0701256	0.0678952	0.0218484	0.391	0.346	1	0
ENSMUSG00000087475	4933406I18Rik	0.0935015	0.145943	-0.0659006	0.0259899	0.221	0.271	1	0
ENSMUSG00000062098	Btbd3	0.0935119	0.0304652	-0.0491653	0.00185914	0.093	0.121	1	0
ENSMUSG00000049775	Tmsb4x	0.0937276	0.0478625	0.0757998	0.0102675	0.256	0.219667	1	0
ENSMUSG00000073678	Pgap1	0.0937648	0.0841888	-0.0686695	0.0302396	0.285	0.336333	1	0
ENSMUSG00000092625	Gm20404	0.0938558	0.0704073	-0.0484658	0.0118912	0.126	0.161333	1	0
ENSMUSG00000015095	Fbxw5	0.0942091	0.0848186	0.0420635	0.0096957	0.116	0.0866667	1	0
ENSMUSG00000024597	Slc12a2	0.0943564	0.0470784	-0.0440155	0.00732702	0.138	0.171	1	0
ENSMUSG00000047193	Dync2h1	0.0944283	0.0774301	-0.0702094	0.0184766	0.457	0.496333	1	0
ENSMUSG00000061436	Hipk2	0.0944322	0.0311657	-0.0501121	0.00285619	0.081	0.106667	1	0
ENSMUSG00000032518	Rpsa	0.0947617	0.0386532	0.0580268	0.00203156	0.216	0.180667	1	0
ENSMUSG00000072966	Gprasp2	0.0948076	0.0232734	0.0475897	0.0010881	0.147	0.116667	1	0
ENSMUSG00000031386	Hcfc1	0.0948556	0.0839437	0.0445464	0.0119838	0.103	0.0746667	1	0	SFARI						1
ENSMUSG00000016200	Syt14	0.0948648	0.0888973	-0.069006	0.0229591	0.703	0.741667	1	0
ENSMUSG00000022195	6030458C11Rik	0.09493	0.102747	-0.0539465	0.0105953	0.143	0.179	1	0
ENSMUSG00000021476	Habp4	0.094934	0.0771186	0.0357553	0.00954379	0.112	0.0833333	1	0
ENSMUSG00000043872	Zmym1	0.0949851	0.0639616	0.0403773	0.00515367	0.11	0.0826667	1	0
ENSMUSG00000032462	Pik3cb	0.0950796	0.068128	0.0370446	0.00875088	0.113	0.0843333	1	0
ENSMUSG00000034863	Ano8	0.095097	0.0468694	0.0459157	0.00724715	0.129	0.100333	1	0
ENSMUSG00000086308	G630016G05Rik	0.0951715	0.0498225	0.0628122	0.00860129	0.268	0.229333	1	0
ENSMUSG00000033629	Hacd3	0.0954889	0.0294683	0.0572759	0.0103424	0.326	0.283667	1	0
ENSMUSG00000021109	Hif1a	0.0956861	0.0485525	0.0619517	0.00190604	0.276	0.238667	1	0
ENSMUSG00000021537	Cetn3	0.0959204	0.0480166	0.0514242	0.00769357	0.251	0.211	1	0
ENSMUSG00000027195	Hsd17b12	0.0959234	0.063661	-0.0585292	0.0172152	0.132	0.165333	1	0
ENSMUSG00000055430	Nap1l5	0.0959828	0.116572	-0.0566317	0.0225301	0.131	0.169667	1	0
ENSMUSG00000070498	Tmem132b	0.096045	0.0976337	0.0754627	0.0215065	0.832	0.811667	1	0
ENSMUSG00000015697	Setdb1	0.0961636	0.0523705	0.0426085	0.00976589	0.387	0.337333	1	0	SFARI					2	0
ENSMUSG00000020841	Cpd	0.0961746	0.0457231	-0.0556047	0.00901318	0.207	0.245	1	0
ENSMUSG00000059890	Ube4a	0.0961944	0.0826399	0.0389836	0.0151027	0.316	0.267	1	0
ENSMUSG00000035268	Pkig	0.0962284	0.0777634	-0.0681982	0.0223703	0.39	0.432333	1	0
ENSMUSG00000038690	Atp5j2	0.0963704	0.054925	0.056973	0.011242	0.153	0.121333	1	0
ENSMUSG00000102758	Naaladl2	0.0965043	0.108272	-0.0962042	0.0171184	0.518	0.551333	1	0	SFARI					2	0
ENSMUSG00000023307	Marchf5	0.0966896	0.0788355	-0.0526965	0.0139515	0.104	0.136333	1	0
ENSMUSG00000025314	Ptprj	0.0967263	0.12701	0.0972693	0.0193461	0.526	0.481	1	0
ENSMUSG00000020780	Srp68	0.0967445	0.0926084	0.0417557	0.0111283	0.109	0.08	1	0
ENSMUSG00000030815	Phkg2	0.0967708	0.0938507	0.0482524	0.0194161	0.156	0.121	1	0
ENSMUSG00000042507	Mideas	0.0968655	0.0934003	0.046717	0.00920404	0.113	0.0846667	1	0
ENSMUSG00000040359	Ufl1	0.0970912	0.1476	0.078117	0.0273918	0.262	0.215667	1	0
ENSMUSG00000025189	Cnnm1	0.0971606	0.0421863	0.074739	0.0126045	0.303	0.263667	1	0
ENSMUSG00000030286	Emc3	0.097528	0.0374874	0.0478757	0.00770288	0.165	0.133333	1	0
ENSMUSG00000033940	Brk1	0.0976208	0.0572575	0.0516996	0.0122823	0.35	0.302333	1	0
ENSMUSG00000037771	Slc32a1	0.097735	0.0465407	0.0808105	0.0139	0.254	0.218667	1	0
ENSMUSG00000038240	Pdss2	0.097857	0.112399	-0.0522582	0.012233	0.238	0.285667	1	0
ENSMUSG00000084799	Ino80dos	0.097942	0.0358595	-0.0414588	0.00681326	0.172	0.209	1	0
ENSMUSG00000056268	Dennd1b	0.0980681	0.0255735	-0.06122	0.00872981	0.429	0.469	1	0
ENSMUSG00000026289	Atg16l1	0.0981002	0.100161	0.0773856	0.0180586	0.369	0.324667	1	0
ENSMUSG00000019979	Apaf1	0.0988079	0.128315	0.0581808	0.013728	0.109	0.079	1	0
ENSMUSG00000041439	Mfsd6	0.0989156	0.108021	-0.0476026	0.00817961	0.085	0.114667	1	0
ENSMUSG00000029405	G3bp2	0.0989725	0.0918455	0.0616643	0.0183892	0.382	0.336	1	0
ENSMUSG00000019927	Ube2d1	0.0989826	0.10607	0.0599963	0.0244786	0.26	0.219333	1	0
ENSMUSG00000033790	Tubgcp5	0.0991344	0.020674	0.0643611	0.0045858	0.238	0.203333	1	0	SFARI					2	0
ENSMUSG00000045896	Paip2b	0.0995329	0.0465054	0.0877197	0.0123625	0.132	0.103667	1	0
ENSMUSG00000006435	Neurl1a	0.0997121	0.0327708	-0.0510809	0.00583356	0.229	0.269333	1	0
ENSMUSG00000037259	Dzank1	0.0997219	0.0880334	0.0764709	0.0178487	0.475	0.438667	1	0
ENSMUSG00000032788	Pdxk	0.099989	0.0705752	0.041984	0.0103606	0.182	0.147667	1	0
ENSMUSG00000033799	Tasor2	0.100187	0.0827125	-0.0481303	0.00781952	0.304	0.35	1	0
ENSMUSG00000105218	Gm38413	0.100223	0.115068	0.0713125	0.0274071	0.334	0.29	1	0
ENSMUSG00000015709	Arnt2	0.100445	0.0927833	-0.0590355	0.0147502	0.256	0.300333	1	0	SFARI					2	0
ENSMUSG00000006728	Cdk4	0.10059	0.141883	0.0368762	0.0139213	0.119	0.0866667	1	0
ENSMUSG00000044167	Foxo1	0.100729	0.0325521	-0.0550573	0.00482859	0.584	0.637667	1	0
ENSMUSG00000029777	Gars	0.101173	0.0531899	0.0395254	0.00768847	0.166	0.133	1	0
ENSMUSG00000039704	Lmbrd2	0.101224	0.0722472	-0.0552549	0.0220287	0.218	0.258	1	0
ENSMUSG00000067889	Sptbn2	0.101231	0.0840846	0.0744958	0.0279128	0.46	0.415	1	0
ENSMUSG00000030259	Rassf8	0.101616	0.130641	-0.0585621	0.0228293	0.171	0.209667	1	0
ENSMUSG00000041923	Nol4	0.101685	0.120053	-0.087265	0.0212933	0.488	0.538	1	0
ENSMUSG00000007659	Bcl2l1	0.101707	0.0483436	-0.0482484	0.00907868	0.122	0.153	1	0
ENSMUSG00000035725	Prkx	0.101818	0.088594	0.0503393	0.0110986	0.179	0.145333	1	0
ENSMUSG00000033713	Foxn3	0.101857	0.0536171	-0.0611585	0.00480517	0.11	0.139333	1	0
ENSMUSG00000024487	Yipf5	0.102183	0.0162336	0.047867	0.00173819	0.232	0.196	1	0
ENSMUSG00000040710	St8sia4	0.102194	0.0834448	-0.0358643	0.0130959	0.091	0.120667	1	0
ENSMUSG00000035790	Cep19	0.102284	0.112129	0.0570827	0.0237919	0.259	0.212333	1	0
ENSMUSG00000020069	Hnrnph3	0.102376	0.0940342	0.0776373	0.0328001	0.372	0.329	1	0
ENSMUSG00000040859	Bsdc1	0.102725	0.138755	0.0463397	0.014109	0.107	0.0783333	1	0
ENSMUSG00000030655	Smg1	0.102734	0.0836909	0.0677407	0.0272501	0.718	0.673333	1	0
ENSMUSG00000021893	Capn7	0.102758	0.0589868	-0.0473603	0.00257319	0.19	0.227333	1	0
ENSMUSG00000010608	Rbm25	0.102903	0.035017	-0.0461954	0.0128573	0.64	0.669333	1	0
ENSMUSG00000033632	AW554918	0.102985	0.0801014	-0.0807017	0.0177723	0.269	0.307333	1	0
ENSMUSG00000036158	Prickle1	0.103004	0.13967	-0.124474	0.0254395	0.446	0.478	1	0	SFARI					2	0
ENSMUSG00000030515	Tarsl2	0.103216	0.0328092	0.0384225	0.010832	0.193	0.157667	1	0
ENSMUSG00000026502	Desi2	0.103227	0.0651915	0.0921103	0.012271	0.446	0.408667	1	0
ENSMUSG00000028218	Cibar1	0.103303	0.0737499	0.0538456	0.00924387	0.26	0.219667	1	0
ENSMUSG00000031812	Map1lc3b	0.103307	0.140047	0.038894	0.0157464	0.101	0.0726667	1	0
ENSMUSG00000110185	Igip	0.103327	0.0878647	0.0375953	0.0103138	0.156	0.122667	1	0
ENSMUSG00000016427	Ndufa1	0.103455	0.144488	0.0494267	0.0176737	0.132	0.099	1	0
ENSMUSG00000021973	Micu2	0.103792	0.11336	-0.0731407	0.0289511	0.199	0.241667	1	0
ENSMUSG00000020953	Coch	0.10395	0.098025	-0.0663178	0.0215251	0.2	0.236667	1	0
ENSMUSG00000039954	Stk32a	0.103952	0.0789631	-0.0992626	0.032673	0.535	0.562667	1	0
ENSMUSG00000052676	Zmat1	0.103958	0.0617639	0.0465146	0.0105212	0.249	0.208333	1	0
ENSMUSG00000024302	Dtna	0.103977	0.0548693	-0.0928873	0.0195141	0.601	0.621333	1	0
ENSMUSG00000040761	Spen	0.104391	0.0441656	0.0499519	0.0043407	0.299	0.258	1	0	SFARI					2	0
ENSMUSG00000028656	Cap1	0.10463	0.132645	-0.0711186	0.0257075	0.321	0.367333	1	0
ENSMUSG00000049047	Armcx3	0.104655	0.0296906	0.044568	0.00326857	0.143	0.113333	1	0
ENSMUSG00000073102	Drc1	0.104898	0.0946047	0.0378448	0.0106574	0.126	0.0966667	1	0
ENSMUSG00000054976	Nyap2	0.104973	0.0689781	-0.157398	0.0396641	0.553	0.573333	1	0
ENSMUSG00000036503	Rnf13	0.105011	0.119628	-0.0817843	0.0274007	0.271	0.310333	1	0
ENSMUSG00000055675	Kbtbd11	0.105037	0.0854133	0.0405042	0.00933106	0.14	0.108667	1	0
ENSMUSG00000054648	Zfp869	0.105185	0.137475	-0.0385481	0.0203023	0.091	0.122667	1	0
ENSMUSG00000022841	Ap2m1	0.105192	0.0513077	0.0428067	0.00824395	0.147	0.117	1	0
ENSMUSG00000015357	Clpx	0.105385	0.0705111	0.0497199	0.00806633	0.244	0.206667	1	0
ENSMUSG00000025982	Sf3b1	0.105601	0.104551	0.0808903	0.0217821	0.662	0.633667	1	0	SFARI					2	0
ENSMUSG00000004591	Pkn2	0.10563	0.0746689	-0.0660252	0.024725	0.438	0.482333	1	0
ENSMUSG00000025159	Mms19	0.105833	0.0896514	0.0536314	0.019713	0.151	0.117	1	0
ENSMUSG00000040896	Kcnd3	0.105846	0.0774129	0.0561409	0.0178197	0.194	0.158667	1	0	SFARI					2	0
ENSMUSG00000063873	Slc24a3	0.105911	0.0461146	-0.0454167	0.0098306	0.274	0.317333	1	0
ENSMUSG00000021112	Pals1	0.106392	0.0812461	0.0723759	0.0201699	0.179	0.147333	1	0
ENSMUSG00000022000	Zc3h13	0.106457	0.120992	-0.0517865	0.0150677	0.397	0.452333	1	0
ENSMUSG00000097068	Gm26760	0.106844	0.124901	-0.0369308	0.0176072	0.09	0.120667	1	0
ENSMUSG00000030432	Rpl28	0.107051	0.148683	0.0547674	0.0282972	0.193	0.151333	1	0
ENSMUSG00000026469	Xpr1	0.107057	0.0747719	-0.0568405	0.0307393	0.443	0.494667	1	0
ENSMUSG00000028657	Ppt1	0.107128	0.103734	-0.0571897	0.0222937	0.232	0.273	1	0
ENSMUSG00000032557	Uba5	0.107162	0.0589955	-0.0512383	0.00839242	0.119	0.148667	1	0
ENSMUSG00000019782	Rwdd1	0.107185	0.0486982	0.02259	0.00297977	0.103	0.0763333	1	0
ENSMUSG00000029359	Tesc	0.107251	0.0692433	0.0696398	0.0164457	0.347	0.307667	1	0
ENSMUSG00000021493	Pdlim7	0.107293	0.0664531	0.0484788	0.0138022	0.201	0.166	1	0
ENSMUSG00000030222	Rerg	0.107618	0.0963205	-0.0658323	0.0230249	0.299	0.342	1	0
ENSMUSG00000032386	Trip4	0.107682	0.0744376	0.0440509	0.0204967	0.299	0.251333	1	0
ENSMUSG00000060988	Galnt13	0.107907	0.127975	-0.069752	0.0229372	0.99	0.992333	1	0	SFARI					2	0
ENSMUSG00000028488	Sh3gl2	0.10802	0.0906552	-0.0738715	0.0236748	0.441	0.483	1	0
ENSMUSG00000047284	Neurl4	0.108249	0.0864378	0.0506487	0.00989644	0.129	0.100667	1	0
ENSMUSG00000034636	Zyg11b	0.108314	0.0837309	-0.0501001	0.0143643	0.219	0.262	1	0
ENSMUSG00000024393	Prrc2a	0.108767	0.110335	0.051476	0.0215984	0.175	0.136	1	0
ENSMUSG00000017631	Abr	0.109187	0.0600517	0.0544133	0.00886483	0.397	0.349	1	0
ENSMUSG00000028772	Zcchc17	0.109727	0.0491475	-0.0356184	0.00489586	0.106	0.135	1	0
ENSMUSG00000034007	Scaper	0.109753	0.115593	-0.0870238	0.0219769	0.496	0.542	1	0
ENSMUSG00000030987	Stim1	0.10991	0.0928112	-0.071117	0.0306248	0.351	0.392667	1	0
ENSMUSG00000023883	Phf10	0.110024	0.0566034	0.0319643	0.00570239	0.132	0.103	1	0
ENSMUSG00000090086	AI480526	0.110233	0.0456046	0.039278	0.00502004	0.137	0.107667	1	0
ENSMUSG00000053799	Exoc6	0.110272	0.123771	0.0493789	0.0222729	0.36	0.308	1	0	SFARI					2	0
ENSMUSG00000104093	A330015K06Rik	0.110327	0.139837	-0.0760408	0.0293406	0.84	0.854667	1	0
ENSMUSG00000006731	B4galnt1	0.110452	0.109116	0.0525036	0.012502	0.137	0.107	1	0
ENSMUSG00000020484	Xbp1	0.110565	0.0715713	0.0470194	0.0121032	0.157	0.126333	1	0
ENSMUSG00000021124	Vti1b	0.110929	0.0545155	-0.070826	0.0118788	0.29	0.326667	1	0
ENSMUSG00000003872	Lin7b	0.110965	0.0765335	0.0311237	0.0111357	0.122	0.0933333	1	0	SFARI					2	0
ENSMUSG00000018412	Kansl1	0.111005	0.110359	0.0414883	0.0145083	0.857	0.822667	1	0	SFARI;EAGLE		Limited	1.1	Discordant	1	1
ENSMUSG00000080717	B230307C23Rik	0.111027	0.147909	-0.0611069	0.0322399	0.097	0.133667	1	0
ENSMUSG00000027167	Elp4	0.111108	0.0922071	-0.0565808	0.0179627	0.381	0.425667	1	0	SFARI					2	0
ENSMUSG00000034681	Rnps1	0.11154	0.0913086	0.039981	0.0121408	0.197	0.160667	1	0
ENSMUSG00000047879	Usp14	0.111584	0.0766739	0.0828175	0.00911406	0.362	0.32	1	0
ENSMUSG00000028798	Eif3i	0.111718	0.0398881	0.0355621	0.00300064	0.103	0.0776667	1	0
ENSMUSG00000020532	Acaca	0.111767	0.0288505	-0.0562603	0.00313123	0.266	0.305	1	0
ENSMUSG00000038717	Atp5l	0.112416	0.148331	0.0433649	0.0203644	0.165	0.129	1	0
ENSMUSG00000027953	Slc50a1	0.112599	0.0925357	0.0470508	0.0152063	0.132	0.101	1	0
ENSMUSG00000071424	Grid2	0.112674	0.0836888	-0.0516641	0.0207164	0.999	0.994667	1	0	SFARI					2	0
ENSMUSG00000071267	Zfp942	0.112746	0.0627164	0.0411553	0.00281245	0.169	0.136667	1	0
ENSMUSG00000025613	Cct8	0.11281	0.168173	0.047919	0.0237956	0.162	0.123333	1	0
ENSMUSG00000034813	Grip1	0.112851	0.0868148	-0.0695203	0.0254057	0.716	0.747333	1	0	SFARI					2	0
ENSMUSG00000020273	Papolg	0.112889	0.163938	0.0410232	0.0237627	0.19	0.149	1	0	SFARI;TADA	0.0648232				2	0
ENSMUSG00000042167	Tent2	0.112954	0.111241	-0.0668596	0.0149432	0.556	0.590333	1	0
ENSMUSG00000022890	Atp5j	0.113045	0.0603543	0.0538297	0.0113862	0.228	0.192667	1	0
ENSMUSG00000027581	Stmn3	0.11309	0.124136	0.0662846	0.0131118	0.231	0.195	1	0
ENSMUSG00000032599	Ip6k2	0.113163	0.107956	-0.0665099	0.0129767	0.175	0.21	1	0
ENSMUSG00000031939	Taf1d	0.113214	0.0375307	0.0457099	0.00967938	0.307	0.269	1	0
ENSMUSG00000118204	4930414N06Rik	0.113289	0.0889777	0.0419574	0.0107573	0.112	0.0846667	1	0
ENSMUSG00000049553	Polr1a	0.113503	0.0281838	0.0446186	0.00280529	0.169	0.138333	1	0
ENSMUSG00000078517	Emc1	0.113785	0.101693	0.0323107	0.00927317	0.104	0.078	1	0
ENSMUSG00000003299	Mrpl4	0.113952	0.0666308	0.0397482	0.0107551	0.11	0.0843333	1	0
ENSMUSG00000027893	Ahcyl1	0.114032	0.0881877	0.0754052	0.017065	0.529	0.487333	1	0
ENSMUSG00000062542	Syt9	0.114149	0.0193875	-0.0432393	0.00108526	0.085	0.110333	1	0
ENSMUSG00000040724	Kcna2	0.114293	0.0467078	0.0487819	0.00223309	0.121	0.095	1	0	SFARI						1
ENSMUSG00000021245	Mlh3	0.114507	0.040161	-0.040404	0.00539821	0.096	0.122667	1	0
ENSMUSG00000060212	Pcnx2	0.114572	0.0471405	-0.0772673	0.00953176	0.332	0.368333	1	0
ENSMUSG00000043241	Upf2	0.114652	0.156202	-0.0731781	0.0296555	0.346	0.392333	1	0	SFARI					2	0
ENSMUSG00000039879	Heca	0.114686	0.0667325	-0.0406887	0.00482165	0.116	0.146333	1	0
ENSMUSG00000014232	Cluap1	0.114751	0.0876193	0.0377115	0.0202936	0.168	0.133333	1	0
ENSMUSG00000034098	Fstl5	0.114759	0.0966774	-0.0627929	0.0358723	0.432	0.485333	1	0
ENSMUSG00000034160	Ogt	0.114875	0.0147779	0.0574554	0.00135327	0.812	0.789667	1	0
ENSMUSG00000030265	Kras	0.114952	0.0772187	-0.0485617	0.0160194	0.131	0.162333	1	0
ENSMUSG00000051375	Pcdh1	0.114977	0.0298478	0.0426604	0.00397838	0.129	0.102333	1	0
ENSMUSG00000028890	Mtf1	0.115006	0.152591	0.0465776	0.0167628	0.141	0.108333	1	0	SFARI					2	0
ENSMUSG00000030738	Eif3c	0.115133	0.0343357	0.0369009	0.0066232	0.216	0.181	1	0
ENSMUSG00000095567	Noc2l	0.115229	0.0768281	0.0624622	0.00352952	0.254	0.217667	1	0
ENSMUSG00000028266	Lmo4	0.115254	0.0403157	0.0664779	0.00690436	0.307	0.268667	1	0
ENSMUSG00000026812	Tsc1	0.115256	0.0786263	0.0615877	0.0158967	0.343	0.300333	1	0	SFARI;EAGLE;TADA	0.0737737	Definitive	17.1	Concordant	1	1
ENSMUSG00000029763	Exoc4	0.115262	0.023852	-0.0513932	0.00550296	0.865	0.891	1	0
ENSMUSG00000027272	Ubr1	0.115304	0.0697229	-0.0316988	0.0129498	0.418	0.463667	1	0	SFARI;EAGLE;TADA	0.0580082	Limited	1.6	Discordant	1	0
ENSMUSG00000025280	Polr3a	0.115442	0.0578367	0.071594	0.00715984	0.197	0.168	1	0	SFARI					3	1
ENSMUSG00000089809	Rasgef1b	0.115476	0.0428245	-0.0610071	0.00810941	0.851	0.875333	1	0
ENSMUSG00000033773	Rpap2	0.115699	0.0460966	0.0451995	0.00474963	0.143	0.114333	1	0
ENSMUSG00000038860	Garnl3	0.115713	0.00989749	0.0328308	0.00177033	0.322	0.280333	1	0
ENSMUSG00000041180	Hectd2	0.115763	0.157259	-0.0526729	0.0265275	0.191	0.233667	1	0
ENSMUSG00000005262	Ufd1	0.116115	0.101793	0.0383506	0.00603732	0.149	0.117333	1	0
ENSMUSG00000007564	Ppp2r1a	0.116127	0.0798097	0.0537078	0.0127207	0.132	0.104333	1	0
ENSMUSG00000070733	Fryl	0.116221	0.0543896	-0.0365618	0.0123776	0.356	0.408	1	0
ENSMUSG00000037624	Kcnk2	0.116478	0.0696778	-0.0610209	0.0365546	0.521	0.559	1	0
ENSMUSG00000018427	Ypel2	0.116565	0.0321447	0.0980622	0.00964476	0.551	0.537333	1	0
ENSMUSG00000046311	Zfp62	0.116839	0.148321	-0.0583393	0.0224426	0.146	0.181	1	0
ENSMUSG00000026470	Stx6	0.116841	0.0908868	-0.0608388	0.0158149	0.203	0.239667	1	0
ENSMUSG00000024286	Ccny	0.116871	0.136663	-0.0776497	0.0199122	0.507	0.538667	1	0
ENSMUSG00000024542	Cep192	0.11689	0.0575265	0.0386911	0.00679955	0.1	0.0756667	1	0
ENSMUSG00000024991	Eif3a	0.116893	0.10712	-0.052721	0.0146243	0.213	0.253	1	0
ENSMUSG00000071753	Cdr1os	0.117078	0.114923	0.093736	0.019358	0.866	0.874	1	0
ENSMUSG00000041220	Elovl6	0.117165	0.0979824	-0.0423717	0.0102188	0.234	0.277	1	0
ENSMUSG00000000948	Gm38393	0.1173	0.111693	0.0806547	0.0161899	0.469	0.428	1	0
ENSMUSG00000052572	Dlg2	0.117403	0.103873	0.0410742	0.0132896	1	1	1	0	SFARI					2	0
ENSMUSG00000025940	Tmem70	0.117463	0.0886629	0.0358655	0.0125229	0.113	0.0853333	1	0
ENSMUSG00000024241	Sos1	0.117481	0.0269822	-0.0640441	0.00851575	0.272	0.308333	1	0
ENSMUSG00000113136	Gm19951	0.117503	0.0929052	0.0443135	0.0122419	0.137	0.106	1	0
ENSMUSG00000042331	Specc1	0.117826	0.0911346	-0.0802555	0.00171957	0.507	0.547	1	0
ENSMUSG00000062209	Erbb4	0.117868	0.0768484	0.204426	0.0527083	0.537	0.517	1	0
ENSMUSG00000040760	Appl1	0.118071	0.0984597	-0.05006	0.0385445	0.388	0.443333	1	0
ENSMUSG00000021615	Xrcc4	0.118125	0.0730127	-0.0621176	0.0215696	0.459	0.505333	1	0
ENSMUSG00000026223	Itm2c	0.118135	0.0944032	0.0871778	0.0223394	0.507	0.479	1	0
ENSMUSG00000109907	Gm45321	0.11825	0.0836585	0.0578083	0.00866735	0.104	0.0793333	1	0
ENSMUSG00000036264	Fstl4	0.118266	0.173581	0.0754936	0.0352237	0.74	0.705333	1	0
ENSMUSG00000032489	Kif9	0.118286	0.0792948	0.0297361	0.00816353	0.1	0.0743333	1	0
ENSMUSG00000053861	Gm9925	0.118301	0.123425	-0.0422595	0.0164727	0.082	0.109333	1	0
ENSMUSG00000038372	Gmds	0.118321	0.129013	-0.0869176	0.0168806	0.351	0.389667	1	0
ENSMUSG00000057863	Rpl36	0.118353	0.0499673	0.0536355	0.00532232	0.169	0.139333	1	0
ENSMUSG00000001847	Rac1	0.118592	0.0535815	-0.0373843	0.00721476	0.134	0.165667	1	0	SFARI						1
ENSMUSG00000092083	Kcnb2	0.1186	0.17229	-0.097071	0.028844	0.7	0.727667	1	0
ENSMUSG00000020038	Cry1	0.118701	0.112073	-0.0486389	0.0163523	0.113	0.143333	1	0
ENSMUSG00000017485	Top2b	0.118895	0.168817	-0.080023	0.0186196	0.475	0.519	1	0	SFARI					2	0
ENSMUSG00000033900	Map9	0.118958	0.0298481	-0.0525311	0.00307927	0.138	0.167667	1	0
ENSMUSG00000029635	Cdk8	0.118965	0.0619901	0.0550144	0.022728	0.629	0.585333	1	0	SFARI						1
ENSMUSG00000036199	Ndufa13	0.11911	0.0938781	0.0375951	0.0177217	0.153	0.120667	1	0
ENSMUSG00000038564	Ift172	0.11915	0.0215748	0.0418296	0.00638272	0.166	0.136	1	0
ENSMUSG00000021039	Snw1	0.119169	0.167695	-0.0479906	0.0280898	0.157	0.198	1	0
ENSMUSG00000051065	Mb21d2	0.119646	0.0696481	-0.0665868	0.0141633	0.181	0.212333	1	0
ENSMUSG00000024535	Snx24	0.120041	0.16613	0.0399029	0.0197027	0.212	0.170333	1	0
ENSMUSG00000039069	Mtg2	0.120068	0.0789451	0.0419922	0.00511911	0.121	0.0943333	1	0
ENSMUSG00000086212	Mkln1os	0.120104	0.0301877	0.0461652	0.00649048	0.147	0.119	1	0
ENSMUSG00000032480	Dhx30	0.120149	0.121421	-0.0602184	0.0258716	0.331	0.378	1	0	SFARI						1
ENSMUSG00000027194	Ttc17	0.120183	0.0408983	0.0567568	0.00522101	0.4	0.362333	1	0
ENSMUSG00000047454	Gphn	0.120225	0.117858	0.0579852	0.0203187	0.984	0.980667	1	0	SFARI					2	0
ENSMUSG00000036943	Rab8b	0.120396	0.0815002	0.0415708	0.0106041	0.178	0.144	1	0
ENSMUSG00000030435	U2af2	0.120729	0.112964	0.0569017	0.0157432	0.168	0.135667	1	0
ENSMUSG00000004264	Phb2	0.120867	0.115127	0.0442758	0.0160109	0.11	0.0816667	1	0
ENSMUSG00000038290	Smg6	0.120953	0.0397369	-0.0721145	0.00485082	0.494	0.522667	1	0	SFARI					2	0
ENSMUSG00000107102	Gm42726	0.120991	0.0516625	0.0509734	0.00836048	0.116	0.0906667	1	0
ENSMUSG00000041438	Utp4	0.120998	0.0798033	-0.0405881	0.0124721	0.093	0.12	1	0
ENSMUSG00000020003	Pex7	0.121221	0.0546279	-0.0586875	0.00600003	0.238	0.275	1	0	SFARI					2	0
ENSMUSG00000039262	Prrc2b	0.121244	0.0773087	0.0723415	0.0130348	0.465	0.427667	1	0
ENSMUSG00000018565	Elp5	0.121287	0.015708	0.0404852	0.00516762	0.104	0.0803333	1	0
ENSMUSG00000022452	Smdt1	0.121761	0.0947653	0.0411069	0.0127706	0.116	0.0893333	1	0
ENSMUSG00000060166	Zdhhc8	0.121766	0.0960063	0.0464383	0.00862141	0.132	0.104667	1	0
ENSMUSG00000066406	Akap13	0.121792	0.0394579	0.030571	0.00109238	0.132	0.103667	1	0
ENSMUSG00000024534	Sncaip	0.121867	0.161492	-0.0423334	0.0432978	0.181	0.229	1	0
ENSMUSG00000006932	Ctnnb1	0.122228	0.176757	0.0647789	0.0226615	0.238	0.197667	1	0	SFARI;EAGLE;TADA	5.54e-05	Definitive	32.75	Concordant	1	0
ENSMUSG00000039615	Stub1	0.122403	0.0853264	0.040206	0.00937459	0.182	0.149	1	0
ENSMUSG00000027646	Src	0.122447	0.177178	0.0404722	0.0204407	0.125	0.093	1	0
ENSMUSG00000062257	Opcml	0.122491	0.126891	-0.0828542	0.0259241	0.903	0.936667	1	0
ENSMUSG00000002279	Lmf1	0.122532	0.161889	0.0629671	0.0222148	0.178	0.143667	1	0
ENSMUSG00000021559	Dapk1	0.122725	0.135554	0.0689174	0.0240059	0.682	0.643667	1	0
ENSMUSG00000042105	Inpp5f	0.122729	0.0866044	-0.0777258	0.016644	0.416	0.456333	1	0
ENSMUSG00000005204	Senp3	0.122976	0.117815	0.0388298	0.0129237	0.137	0.107	1	0
ENSMUSG00000050321	Neto1	0.12299	0.0820035	-0.0762641	0.018741	0.924	0.951667	1	0
ENSMUSG00000027589	Pcmtd2	0.123205	0.0902343	-0.0592124	0.0133402	0.313	0.36	1	0
ENSMUSG00000034551	Hdx	0.123394	0.0318484	-0.0545869	0.00400555	0.241	0.275667	1	0
ENSMUSG00000056851	Pcbp2	0.123574	0.116326	0.099483	0.0345726	0.537	0.501333	1	0
ENSMUSG00000032966	Fkbp1a	0.123743	0.0181937	0.0467372	0.00513634	0.368	0.329	1	0
ENSMUSG00000004535	Tax1bp1	0.123896	0.0915419	-0.0507467	0.00844342	0.328	0.372	1	0
ENSMUSG00000025162	Csnk1d	0.124079	0.0865205	0.0444977	0.0140931	0.137	0.108	1	0
ENSMUSG00000055302	Mrfap1	0.12418	0.120614	0.0544724	0.0202458	0.147	0.115333	1	0
ENSMUSG00000049421	Zfp260	0.124181	0.0696582	-0.036901	0.00466421	0.101	0.129	1	0
ENSMUSG00000022838	Eaf2	0.12437	0.062465	0.0524323	0.0110911	0.2	0.169667	1	0
ENSMUSG00000032897	Nfyc	0.124387	0.0722113	-0.0587252	0.0219641	0.357	0.401667	1	0
ENSMUSG00000027438	Napb	0.124473	0.0231508	0.0610659	0.00668265	0.271	0.237	1	0
ENSMUSG00000025035	Arl3	0.124747	0.152689	0.0629131	0.0217289	0.312	0.269333	1	0
ENSMUSG00000005533	Igf1r	0.125224	0.0833349	-0.0725786	0.0260874	0.454	0.493	1	0
ENSMUSG00000021258	Ccnk	0.1253	0.0493905	0.0399328	0.0111349	0.14	0.112	1	0	SFARI						1
ENSMUSG00000020993	Trappc6b	0.125305	0.155907	0.0636428	0.018928	0.207	0.17	1	0	SFARI						1
ENSMUSG00000097589	Dleu2	0.125605	0.123108	-0.0757149	0.0295614	0.451	0.494	1	0
ENSMUSG00000024137	E4f1	0.125665	0.0392957	0.0373848	0.00618219	0.122	0.0963333	1	0
ENSMUSG00000030754	Copb1	0.12607	0.0727954	0.0458676	0.01082	0.206	0.171333	1	0
ENSMUSG00000040451	Sgms1	0.126297	0.170627	-0.0852854	0.0235499	0.375	0.417333	1	0
ENSMUSG00000029033	Acap3	0.126521	0.154333	0.0457646	0.0182399	0.168	0.134	1	0
ENSMUSG00000032024	Clmp	0.126534	0.0599574	-0.0509162	0.00577097	0.182	0.216	1	0
ENSMUSG00000027722	Spata5	0.126608	0.214617	-0.110488	0.0382886	0.334	0.385333	1	0
ENSMUSG00000028329	Xpa	0.12689	0.107518	-0.0326467	0.0128408	0.118	0.149333	1	0
ENSMUSG00000022095	Fhip2b	0.126894	0.116878	0.0493793	0.0114888	0.146	0.115667	1	0
ENSMUSG00000038332	Sesn1	0.126913	0.103377	-0.0498693	0.0132939	0.407	0.455333	1	0
ENSMUSG00000024276	Zfp397	0.127392	0.11216	-0.0386628	0.0138754	0.112	0.141667	1	0
ENSMUSG00000021113	Snapc1	0.127416	0.0604183	0.0395652	0.00385579	0.16	0.130667	1	0
ENSMUSG00000022895	Ets2	0.127525	0.0288227	0.0311572	0.00952315	0.116	0.091	1	0
ENSMUSG00000024764	Naa40	0.127957	0.0546804	0.0551446	0.00855624	0.272	0.236	1	0
ENSMUSG00000027849	Syt6	0.128156	0.152332	-0.0368172	0.0298189	0.39	0.435	1	0
ENSMUSG00000032336	Nptn	0.128605	0.145128	-0.0514853	0.0192315	0.966	0.974667	1	0
ENSMUSG00000032594	Ip6k1	0.129112	0.131029	0.0599582	0.0177221	0.237	0.201333	1	0
ENSMUSG00000022114	Spry2	0.129264	0.119983	0.0539539	0.0229264	0.266	0.227333	1	0	SFARI;TADA	0.0397936				2	0
ENSMUSG00000097497	Gm26652	0.129444	0.118749	0.0515103	0.0138045	0.176	0.144333	1	0
ENSMUSG00000002949	Timm44	0.129536	0.0886768	0.0613971	0.0161304	0.35	0.313333	1	0
ENSMUSG00000040649	Rimklb	0.129818	0.0909062	0.0491132	0.00624883	0.109	0.084	1	0
ENSMUSG00000028572	Hook1	0.129822	0.102481	0.0625944	0.0181704	0.51	0.460667	1	0
ENSMUSG00000037990	Sh3rf3	0.129878	0.108509	-0.0998444	0.030305	0.519	0.552667	1	0	SFARI					2	0
ENSMUSG00000028360	Slc44a5	0.130116	0.06033	-0.0508546	0.00279354	0.204	0.241	1	0
ENSMUSG00000028676	Srsf10	0.130172	0.118922	-0.0661313	0.0341237	0.291	0.332	1	0
ENSMUSG00000040548	Tex2	0.130404	0.110576	0.0590428	0.0232959	0.196	0.16	1	0
ENSMUSG00000023809	Rps6ka2	0.1305	0.163993	0.067847	0.0313411	0.378	0.333	1	0	SFARI					2	0
ENSMUSG00000038784	Cnot4	0.130714	0.146576	-0.0636391	0.0160222	0.566	0.610333	1	0
ENSMUSG00000022054	Nefm	0.130873	0.111332	0.044982	0.0222823	0.109	0.0796667	1	0
ENSMUSG00000095253	Zfp799	0.131183	0.0910013	-0.0856487	0.0160343	0.231	0.261333	1	0
ENSMUSG00000036225	Kctd1	0.131784	0.0746378	-0.0723655	0.0114226	0.687	0.727333	1	0
ENSMUSG00000038132	Rbm24	0.131791	0.0773424	0.0662902	0.010172	0.251	0.217333	1	0
ENSMUSG00000048787	Dcun1d3	0.132258	0.0677264	0.0326842	0.00388868	0.107	0.082	1	0
ENSMUSG00000066607	Insyn1	0.132542	0.17691	0.0526598	0.025174	0.125	0.0923333	1	0
ENSMUSG00000000740	Rpl13	0.132885	0.113928	0.0604753	0.0200836	0.226	0.193333	1	0
ENSMUSG00000039067	Psmd7	0.132936	0.0457095	0.0594468	0.00915519	0.174	0.145333	1	0
ENSMUSG00000075415	Fnbp1	0.132975	0.0901589	-0.100165	0.0230844	0.228	0.256	1	0
ENSMUSG00000049252	Lrp1b	0.133251	0.188054	-0.0839274	0.0311649	0.991	0.993333	1	0
ENSMUSG00000042308	Setd1a	0.133985	0.16332	0.0527583	0.0140525	0.153	0.121667	1	0	SFARI;EAGLE;TADA	0.0133752	Limited	4.35	Discordant	1	0
ENSMUSG00000035202	Lars2	0.134119	0.0799018	0.0738745	0.0189381	0.525	0.489	1	0
ENSMUSG00000031382	Asb11	0.134184	0.0426632	0.0470821	0.00469292	0.206	0.173667	1	0
ENSMUSG00000027575	Arfgap1	0.13423	0.17643	0.0608366	0.018198	0.253	0.215	1	0
ENSMUSG00000044950	Pwwp2a	0.134309	0.0586102	-0.0351492	0.00979416	0.31	0.352	1	0
ENSMUSG00000074698	Csnk2a1	0.134394	0.12448	0.0744124	0.0184972	0.35	0.314333	1	0	SFARI;EAGLE;TADA	0.0264877	Moderate	6.2	Discordant	1	0
ENSMUSG00000052852	Reep1	0.134708	0.0548008	-0.0431271	0.00903957	0.425	0.467333	1	0
ENSMUSG00000046822	Slc39a3	0.13486	0.176752	0.0571356	0.0141693	0.154	0.123	1	0
ENSMUSG00000021701	Plk2	0.134993	0.0959872	0.0638392	0.0303246	0.503	0.461667	1	0
ENSMUSG00000052372	Il1rapl1	0.135112	0.181438	0.0443719	0.0206948	1	1	1	0	SFARI					2	0
ENSMUSG00000029651	Mtus2	0.13523	0.0944842	-0.084274	0.0167508	0.444	0.472	1	0
ENSMUSG00000028382	Ptbp3	0.135275	0.0616017	-0.0405805	0.0112505	0.176	0.211	1	0
ENSMUSG00000054843	Atrnl1	0.135451	0.124465	-0.0830669	0.0250828	0.812	0.822	1	0
ENSMUSG00000018995	Nars2	0.135464	0.0476074	-0.0704345	0.0216173	0.271	0.303667	1	0
ENSMUSG00000030744	Rps3	0.135512	0.117703	0.0366402	0.00849602	0.106	0.0806667	1	0
ENSMUSG00000028373	Astn2	0.135694	0.0524919	-0.0846545	0.042482	0.19	0.221667	1	0	SFARI;EAGLE		Limited	2.5	Discordant	2	0
ENSMUSG00000026427	Eif2d	0.135887	0.0277345	0.0460988	0.00324312	0.15	0.123333	1	0
ENSMUSG00000058761	Rnf169	0.135953	0.0601049	-0.0435943	0.017785	0.399	0.445333	1	0
ENSMUSG00000025362	Rps26	0.136067	0.0549531	0.0477173	0.00475487	0.132	0.106333	1	0
ENSMUSG00000021188	Trip11	0.136275	0.0526669	-0.0495146	0.00937262	0.259	0.294333	1	0
ENSMUSG00000029319	Coq2	0.136312	0.0434464	-0.046328	0.0114043	0.144	0.173	1	0
ENSMUSG00000022992	Kansl2	0.136518	0.0932625	0.0551342	0.00987781	0.199	0.167333	1	0
ENSMUSG00000002416	Ndufb2	0.136833	0.0581676	0.030618	0.00335188	0.11	0.086	1	0
ENSMUSG00000054391	4930517O19Rik	0.137266	0.149557	-0.0430402	0.0110983	0.113	0.143667	1	0
ENSMUSG00000032258	Lca5	0.137477	0.051329	0.0465026	0.00838373	0.204	0.172667	1	0
ENSMUSG00000006699	Cdc42	0.137524	0.114127	0.0832937	0.0354909	0.441	0.401333	1	0	EAGLE		Limited	0.5	Discordant
ENSMUSG00000028692	Akr1a1	0.137541	0.0413414	0.0374333	0.00589355	0.121	0.0956667	1	0
ENSMUSG00000029095	Ablim2	0.137737	0.202305	0.0695231	0.0361647	0.754	0.714333	1	0
ENSMUSG00000038807	Rap1gap2	0.137896	0.0225102	0.0689277	0.0123824	0.272	0.241667	1	0
ENSMUSG00000000861	Bcl11a	0.138109	0.0623728	-0.0488013	0.0228546	0.519	0.559	1	0	SFARI;EAGLE;TADA	0.00044409	Moderate	9.15	Discordant	1	1
ENSMUSG00000036501	Fam13b	0.139046	0.0767125	-0.0493569	0.00229183	0.29	0.330667	1	0
ENSMUSG00000000631	Myo18a	0.139072	0.172464	0.0498898	0.0278142	0.356	0.31	1	0
ENSMUSG00000039278	Pcsk1n	0.139184	0.062745	0.076532	0.0120983	0.501	0.464333	1	0
ENSMUSG00000024566	Atp9b	0.139212	0.0744401	-0.0682092	0.0182082	0.544	0.576	1	0
ENSMUSG00000066415	Msl2	0.139351	0.148012	-0.0370422	0.0219065	0.157	0.192667	1	0	TADA	0.0720013
ENSMUSG00000058006	Mdn1	0.139392	0.138341	0.0627179	0.0326637	0.407	0.363333	1	0
ENSMUSG00000021596	Mctp1	0.139461	0.0821621	-0.0500411	0.0114772	0.971	0.983	1	0
ENSMUSG00000013701	Timm23	0.139477	0.098468	-0.0432178	0.0169342	0.143	0.173667	1	0
ENSMUSG00000062981	Mrpl42	0.139495	0.035574	0.0375743	0.00111729	0.112	0.0876667	1	0
ENSMUSG00000007817	Zmiz1	0.139553	0.0862105	0.0360389	0.00880818	0.104	0.0803333	1	0	SFARI					2	1
ENSMUSG00000026034	Clk1	0.139666	0.10367	0.0847695	0.020396	0.735	0.729333	1	0
ENSMUSG00000028901	Gmeb1	0.139674	0.0654351	0.0399956	0.00637776	0.182	0.150667	1	0
ENSMUSG00000022403	St13	0.139718	0.0841458	0.042257	0.00394891	0.331	0.291	1	0
ENSMUSG00000032314	Etfa	0.14013	0.0641605	0.0277971	0.00863297	0.166	0.135	1	0
ENSMUSG00000030706	Mrpl48	0.140289	0.0259535	-0.0311157	0.00544763	0.096	0.120667	1	0
ENSMUSG00000020257	Wdr82	0.140325	0.0468016	0.0382345	0.00368977	0.166	0.136667	1	0
ENSMUSG00000021720	Rnf180	0.140404	0.141648	-0.043851	0.0306068	0.246	0.287333	1	0
ENSMUSG00000009927	Rps25	0.140488	0.081667	0.0463421	0.0123983	0.16	0.131333	1	0
ENSMUSG00000063160	Numbl	0.140561	0.0492951	0.0383753	0.00388868	0.109	0.085	1	0
ENSMUSG00000027160	Ccdc34	0.140987	0.158503	-0.0536999	0.0165929	0.103	0.134333	1	0
ENSMUSG00000009734	Pou6f2	0.141049	0.151229	-0.0394654	0.0324756	0.165	0.201333	1	0
ENSMUSG00000009907	Vps4b	0.141276	0.038531	-0.0501037	0.00349665	0.196	0.225667	1	0
ENSMUSG00000052833	Sae1	0.14129	0.0973439	-0.0330399	0.0084356	0.14	0.171	1	0	SFARI					2	0
ENSMUSG00000022750	Klhl22	0.141311	0.10828	0.0437098	0.0171449	0.204	0.170333	1	0
ENSMUSG00000059518	Znhit1	0.141687	0.097394	0.0394137	0.00558648	0.118	0.0923333	1	0
ENSMUSG00000040860	Crocc	0.141837	0.162479	0.0559429	0.0210001	0.406	0.356667	1	0
ENSMUSG00000002028	Kmt2a	0.142016	0.127295	0.0614599	0.0203595	0.747	0.728	1	0	SFARI;EAGLE;TADA	0.00142415	Definitive	18.55	Concordant	1	1
ENSMUSG00000026322	Htr4	0.142198	0.144998	0.0957308	0.0277326	0.112	0.085	1	0
ENSMUSG00000018651	Tada2a	0.142242	0.170662	-0.0435988	0.0185625	0.182	0.22	1	0
ENSMUSG00000046876	Atxn1	0.142265	0.0887191	-0.0670414	0.013289	0.972	0.977333	1	0
ENSMUSG00000090290	Tarbp1	0.14251	0.171082	-0.0359395	0.0171317	0.109	0.14	1	0
ENSMUSG00000030621	Me3	0.142559	0.0984164	-0.0909094	0.0189472	0.725	0.745	1	0
ENSMUSG00000026249	Serpine2	0.142597	0.175264	-0.076186	0.0550857	0.457	0.498	1	0
ENSMUSG00000029701	Rbm28	0.142852	0.107247	0.0700195	0.0107657	0.449	0.409	1	0
ENSMUSG00000041794	Myrip	0.14286	0.0798409	-0.0479476	0.00807559	0.135	0.163667	1	0
ENSMUSG00000030123	Plxnd1	0.143105	0.152746	0.0471775	0.019363	0.181	0.149	1	0
ENSMUSG00000027602	Map1lc3a	0.143436	0.082535	0.0462434	0.00706464	0.101	0.0783333	1	0
ENSMUSG00000025586	Cpeb1	0.143454	0.116745	0.0526787	0.0212307	0.191	0.156333	1	0
ENSMUSG00000040640	Erc2	0.143541	0.200621	-0.0525924	0.0268004	1	0.998333	1	0
ENSMUSG00000074264	Amy1	0.143983	0.116725	0.0621987	0.00860329	0.306	0.266333	1	0
ENSMUSG00000020196	Cabin1	0.14401	0.185788	0.055988	0.0195434	0.331	0.288333	1	0
ENSMUSG00000050323	Ndufaf6	0.144012	0.114026	-0.0392475	0.00942861	0.096	0.123	1	0
ENSMUSG00000006005	Tpr	0.144226	0.0466761	0.0574461	0.00878811	0.375	0.339667	1	0
ENSMUSG00000005813	Metap1	0.144246	0.025336	-0.0317455	0.00474342	0.088	0.113	1	0
ENSMUSG00000027881	Prpf38b	0.144299	0.0700385	0.0416766	0.0111865	0.278	0.241333	1	0
ENSMUSG00000030134	Rasgef1a	0.14452	0.0731304	0.0512264	0.0132801	0.768	0.742333	1	0
ENSMUSG00000030615	Tmem126a	0.144559	0.0751068	-0.0310345	0.00910872	0.11	0.137667	1	0
ENSMUSG00000020628	Trappc12	0.144641	0.0395302	0.0585609	0.00615087	0.249	0.218	1	0
ENSMUSG00000110410	4933421D24Rik	0.144745	0.19043	0.0466142	0.0239394	0.128	0.096	1	0
ENSMUSG00000036281	Snapc4	0.144835	0.0716731	0.0363566	0.00479353	0.134	0.107333	1	0
ENSMUSG00000058239	Usf2	0.144882	0.175482	0.0418194	0.017581	0.14	0.109333	1	0
ENSMUSG00000025503	Taldo1	0.145173	0.114707	0.0364242	0.0104799	0.126	0.1	1	0
ENSMUSG00000029234	Tmem165	0.145184	0.0839076	-0.0461491	0.0181766	0.176	0.209	1	0
ENSMUSG00000031979	Cog2	0.145341	0.0709549	0.0392896	0.00869586	0.138	0.112	1	0
ENSMUSG00000018820	Zfyve27	0.145353	0.0678022	0.0341767	0.00507824	0.121	0.0956667	1	0
ENSMUSG00000045039	Megf8	0.145382	0.0642541	0.0450289	0.00604774	0.144	0.117333	1	0
ENSMUSG00000052296	Ppp6r1	0.145438	0.157725	0.0495627	0.0194205	0.143	0.112667	1	0
ENSMUSG00000025616	Usp16	0.145452	0.128757	0.0750519	0.0155399	0.304	0.272333	1	0
ENSMUSG00000086993	Rsf1os2	0.14567	0.164456	-0.0369225	0.0261056	0.125	0.157333	1	0
ENSMUSG00000028525	Pde4b	0.14569	0.125685	-0.160714	0.0553018	0.766	0.780667	1	0
ENSMUSG00000104677	Gm43376	0.145914	0.041273	0.05925	0.0125998	0.357	0.317667	1	0
ENSMUSG00000029544	Cabp1	0.145945	0.0725155	0.0463684	0.0080568	0.241	0.207333	1	0
ENSMUSG00000022564	Grina	0.146068	0.132629	0.0704705	0.025512	0.391	0.353333	1	0
ENSMUSG00000117286	Gm1043	0.146126	0.121912	0.081078	0.0125949	0.594	0.576667	1	0
ENSMUSG00000020894	Vamp2	0.146352	0.0293619	0.0436259	0.00420678	0.179	0.150667	1	0	SFARI						1
ENSMUSG00000028165	Cisd2	0.146767	0.0783506	0.0558794	0.00705165	0.231	0.2	1	0
ENSMUSG00000036591	Arhgap21	0.14695	0.126733	-0.0657337	0.0310818	0.499	0.537333	1	0
ENSMUSG00000015879	Fam184b	0.147003	0.153687	-0.0777493	0.0331664	0.366	0.401	1	0
ENSMUSG00000022783	Spag6l	0.147142	0.103307	-0.0352599	0.0142386	0.082	0.107333	1	0
ENSMUSG00000052302	Tbc1d30	0.147424	0.0839553	-0.0362655	0.0102061	0.256	0.295	1	0
ENSMUSG00000035969	Rusc2	0.14753	0.107548	-0.0249672	0.0100676	0.081	0.107	1	0
ENSMUSG00000027889	Ampd2	0.147642	0.114165	0.0542277	0.0150902	0.169	0.140333	1	0
ENSMUSG00000061477	Rps7	0.147655	0.126781	0.0388325	0.0133716	0.131	0.103333	1	0
ENSMUSG00000030766	Arhgap17	0.147663	0.147973	0.0463739	0.0205644	0.25	0.211	1	0
ENSMUSG00000033917	Gde1	0.14793	0.195659	0.0634682	0.0256768	0.253	0.215667	1	0
ENSMUSG00000010110	Stx5a	0.147935	0.116374	-0.0574125	0.0193339	0.188	0.222667	1	0
ENSMUSG00000025809	Itgb1	0.148076	0.0960588	-0.0537801	0.0074142	0.174	0.204333	1	0
ENSMUSG00000027200	Sema6d	0.148078	0.0967533	0.0980622	0.0153909	0.646	0.615333	1	0
ENSMUSG00000022523	Fgf12	0.148165	0.0337363	-0.0520946	0.0109731	0.974	0.980333	1	0
ENSMUSG00000039347	Atp6v0e2	0.148344	0.107213	0.0341505	0.0125909	0.101	0.078	1	0
ENSMUSG00000048234	Rnf149	0.148493	0.085373	-0.058517	0.0117555	0.204	0.235	1	0
ENSMUSG00000017550	Atad5	0.148915	0.185174	0.0403864	0.0172592	0.107	0.0813333	1	0
ENSMUSG00000026788	Zbtb43	0.148949	0.0940481	0.0426617	0.0113746	0.113	0.089	1	0
ENSMUSG00000052698	Tln2	0.149255	0.0338396	-0.0353804	0.019041	0.604	0.657667	1	0
ENSMUSG00000020883	Fbxl20	0.149373	0.158937	-0.0472917	0.0165043	0.309	0.351667	1	0
ENSMUSG00000028030	Tbck	0.149533	0.150882	-0.0592287	0.0184245	0.356	0.392667	1	0	SFARI;EAGLE		Limited	1	Discordant	1	1
ENSMUSG00000040731	Eif4h	0.149671	0.150086	0.0341445	0.0110289	0.184	0.149667	1	0
ENSMUSG00000030447	Cyfip1	0.14979	0.0804614	0.0503839	0.0107643	0.26	0.225	1	0	SFARI					2	0
ENSMUSG00000033063	Cntnap3	0.149863	0.0861244	-0.0553986	0.0244162	0.491	0.530333	1	0	SFARI					2	0
ENSMUSG00000042873	Lhfpl4	0.149912	0.194563	-0.0374356	0.0239122	0.147	0.184667	1	0
ENSMUSG00000047539	Fbxo28	0.149963	0.0712625	0.0497078	0.0104728	0.203	0.172667	1	0
ENSMUSG00000036769	Wdr44	0.149993	0.140156	0.0457188	0.0174667	0.266	0.227333	1	0
ENSMUSG00000038665	Dgki	0.150125	0.155815	-0.0709449	0.0274669	0.988	0.992333	1	0
ENSMUSG00000021468	Sptlc1	0.150353	0.0501105	0.050469	0.00575274	0.193	0.163333	1	0
ENSMUSG00000026914	Psmd14	0.150443	0.108345	-0.0767694	0.0116586	0.515	0.547	1	0
ENSMUSG00000042675	Ypel3	0.15045	0.173211	0.0479271	0.0167905	0.169	0.136333	1	0
ENSMUSG00000025722	Wdr73	0.150683	0.101551	0.0297134	0.00886115	0.124	0.097	1	0
ENSMUSG00000054199	Gon4l	0.150798	0.0449122	0.0565219	0.0134746	0.297	0.264	1	0
ENSMUSG00000029775	Klhdc10	0.15081	0.174448	-0.0818428	0.0274028	0.375	0.408667	1	0
ENSMUSG00000030276	Ttll3	0.151061	0.209457	0.0559611	0.0180061	0.118	0.09	1	0
ENSMUSG00000030967	Zranb1	0.151144	0.0634494	-0.049009	0.0113404	0.353	0.395	1	0
ENSMUSG00000022800	Fyttd1	0.151353	0.0459322	0.0499555	0.0062796	0.331	0.293667	1	0
ENSMUSG00000056938	Acbd4	0.151557	0.169739	0.0462081	0.0128066	0.109	0.0833333	1	0
ENSMUSG00000042213	Zfand4	0.151613	0.132523	0.0374011	0.0107639	0.103	0.0793333	1	0
ENSMUSG00000078515	Ddi2	0.151825	0.0425091	0.0432617	0.00205664	0.194	0.164333	1	0
ENSMUSG00000049878	Rlf	0.152027	0.13232	-0.0649886	0.0150858	0.29	0.326333	1	0
ENSMUSG00000073702	Rpl31	0.152155	0.149813	0.0519276	0.0106929	0.215	0.180667	1	0
ENSMUSG00000034951	Cog7	0.152335	0.0793646	0.0471565	0.0076402	0.132	0.107	1	0
ENSMUSG00000042942	Greb1l	0.15248	0.0376206	0.0613534	0.0110288	0.138	0.113333	1	0
ENSMUSG00000020048	Hsp90b1	0.152592	0.0448037	0.0614159	0.00813513	0.328	0.296	1	0
ENSMUSG00000020827	Mink1	0.152814	0.106632	0.0760735	0.0156349	0.478	0.446333	1	0	SFARI					3	0
ENSMUSG00000052512	Nav2	0.152857	0.129647	-0.0633479	0.0284989	0.697	0.723667	1	0	SFARI					2	0
ENSMUSG00000042700	Sipa1l1	0.153044	0.071234	0.0462458	0.00862544	0.971	0.971	1	0
ENSMUSG00000026727	Rsu1	0.153055	0.109311	-0.0471577	0.0252762	0.126	0.155	1	0
ENSMUSG00000097616	1110019D14Rik	0.153116	0.123966	-0.0368062	0.0180416	0.154	0.189333	1	0
ENSMUSG00000042548	Asxl1	0.15315	0.0317531	0.0584591	0.0115661	0.384	0.349	1	0
ENSMUSG00000028552	Eps15	0.153411	0.0154909	-0.0393783	0.0035317	0.143	0.171333	1	0
ENSMUSG00000041571	Selenow	0.15351	0.114671	0.0467487	0.0206837	0.254	0.218	1	0
ENSMUSG00000043635	Adamts3	0.153614	0.0635501	-0.0487657	0.0147062	0.841	0.864333	1	0
ENSMUSG00000003345	Csnk1g2	0.15372	0.16703	0.0338908	0.0181511	0.134	0.103333	1	0
ENSMUSG00000050272	Dscam	0.153795	0.153481	-0.0629214	0.0253394	0.162	0.194333	1	0	SFARI;EAGLE		Definitive	13.5	Concordant	1	0
ENSMUSG00000040952	Rps19	0.15388	0.114356	0.049061	0.0104357	0.138	0.111667	1	0
ENSMUSG00000097040	2610316D01Rik	0.153979	0.212001	0.0649995	0.0287388	0.244	0.205333	1	0
ENSMUSG00000024261	Syt4	0.154043	0.112082	0.0660682	0.00143838	0.394	0.358667	1	0
ENSMUSG00000038446	Cdc40	0.154056	0.142683	0.0573168	0.0100938	0.346	0.307	1	0
ENSMUSG00000045071	E130308A19Rik	0.154125	0.226794	-0.0738526	0.0391404	0.182	0.221667	1	0
ENSMUSG00000054434	Tmem120b	0.154398	0.129786	0.0535627	0.0116099	0.135	0.109333	1	0
ENSMUSG00000021748	Pdhb	0.15442	0.164419	0.0443191	0.0123858	0.181	0.149	1	0
ENSMUSG00000029434	Vps33a	0.154724	0.0711147	0.0463559	0.0072237	0.194	0.164667	1	0
ENSMUSG00000002546	Golga2	0.154738	0.032508	0.0340869	0.00507342	0.125	0.100333	1	0
ENSMUSG00000040712	Camta2	0.154744	0.0921252	0.0332251	0.013782	0.129	0.103	1	0	TADA	0.0140968
ENSMUSG00000036745	Ttll7	0.154885	0.111288	-0.0413405	0.0198616	0.451	0.492	1	0
ENSMUSG00000033972	Zfp944	0.15497	0.0220216	-0.023273	0.0107116	0.121	0.148333	1	0
ENSMUSG00000031796	Cfap20	0.155091	0.0475988	0.0503607	0.0112057	0.246	0.213667	1	0
ENSMUSG00000048109	Rbm15	0.155105	0.100226	-0.0443528	0.00990998	0.135	0.163333	1	0
ENSMUSG00000027374	Mrps5	0.155224	0.128875	0.046248	0.0135445	0.118	0.0926667	1	0
ENSMUSG00000050530	Fam171a1	0.155228	0.0503247	-0.0448027	0.00238462	0.475	0.525	1	0
ENSMUSG00000027035	Cers6	0.155408	0.0673349	-0.0774656	0.00302958	0.46	0.49	1	0
ENSMUSG00000002413	Braf	0.155551	0.0973958	-0.0572783	0.0204702	0.713	0.751	1	0	SFARI					1	1
ENSMUSG00000102869	Norad	0.155728	0.196228	0.0461624	0.0169043	0.207	0.171667	1	0
ENSMUSG00000046480	Scn4b	0.155829	0.116671	0.0862618	0.0164893	0.399	0.367	1	0
ENSMUSG00000020170	Frs2	0.155962	0.17365	0.0492254	0.0213329	0.324	0.280667	1	0
ENSMUSG00000060743	H3f3a	0.156327	0.0870744	-0.0325119	0.00198793	0.178	0.211333	1	0
ENSMUSG00000079614	Seh1l	0.156368	0.158302	0.0335654	0.0158297	0.106	0.079	1	0
ENSMUSG00000003469	Phyhip	0.15644	0.0597157	0.0280929	0.00500687	0.135	0.109333	1	0
ENSMUSG00000040356	Skiv2l	0.156884	0.180215	0.0323318	0.0133091	0.103	0.078	1	0
ENSMUSG00000051335	Gfod1	0.156952	0.169229	-0.0547578	0.0246127	0.259	0.297333	1	0
ENSMUSG00000000378	Ccm2	0.156992	0.105253	0.0679339	0.0249149	0.281	0.247667	1	0
ENSMUSG00000033793	Atp6v1h	0.157551	0.168135	-0.07003	0.0259977	0.538	0.585	1	0
ENSMUSG00000012535	Tnpo3	0.157967	0.132214	-0.0347879	0.0183399	0.263	0.309	1	0	SFARI;TADA	0.0513369				3	0
ENSMUSG00000020431	Adcy1	0.157994	0.117997	0.027507	0.0129151	0.109	0.0836667	1	0
ENSMUSG00000027002	Nckap1	0.158287	0.0548244	-0.0781738	0.00232943	0.768	0.780333	1	0	SFARI					1	0
ENSMUSG00000051786	Tubgcp6	0.158319	0.159188	0.0420409	0.0120052	0.1	0.0763333	1	0
ENSMUSG00000026159	Agfg1	0.158377	0.13266	-0.0520272	0.0265809	0.296	0.332667	1	0
ENSMUSG00000070576	Mn1	0.158647	0.0725645	-0.0380664	0.00948674	0.138	0.167	1	0
ENSMUSG00000021301	Hecw1	0.159185	0.147631	-0.0654106	0.0219487	0.606	0.638667	1	0
ENSMUSG00000069729	Arid1b	0.159251	0.0439918	-0.0706897	0.0100908	0.778	0.816	1	0	SFARI;EAGLE;TADA	5.27e-13	Definitive	34.75	Concordant	1	1
ENSMUSG00000045441	Gprin3	0.159432	0.160479	-0.0937436	0.0714925	0.582	0.629333	1	0
ENSMUSG00000001833	Septin7	0.15953	0.147156	-0.123704	0.0307655	0.381	0.412667	1	0
ENSMUSG00000068290	Ddrgk1	0.159604	0.0825668	0.0233323	0.00750552	0.157	0.128333	1	0
ENSMUSG00000086040	Wipf3	0.15979	0.130706	-0.0370449	0.0118897	0.503	0.544333	1	0
ENSMUSG00000019467	Arhgef25	0.159813	0.120038	0.0416593	0.0136969	0.109	0.0846667	1	0
ENSMUSG00000043857	Mgat5b	0.159833	0.0545014	0.0623599	0.00800252	0.299	0.267	1	0
ENSMUSG00000001441	Npepps	0.159905	0.133905	-0.0658614	0.0144245	0.507	0.543667	1	0
ENSMUSG00000024213	Nudt3	0.160064	0.169032	0.0418867	0.0191433	0.131	0.104	1	0
ENSMUSG00000031153	Gripap1	0.160065	0.128593	0.0725769	0.0267803	0.487	0.45	1	0
ENSMUSG00000025278	Flnb	0.16012	0.106708	-0.0443514	0.0179977	0.262	0.298667	1	0
ENSMUSG00000054414	Slc30a7	0.160125	0.122548	-0.0446656	0.0171806	0.172	0.205	1	0
ENSMUSG00000101930	Gm5441	0.160549	0.0286534	-0.0622459	0.00587104	0.263	0.295333	1	0
ENSMUSG00000020476	Dbnl	0.160731	0.070907	0.0261223	0.00730872	0.118	0.0933333	1	0
ENSMUSG00000002052	Supt6	0.160885	0.191741	0.0439042	0.0267788	0.272	0.231333	1	0
ENSMUSG00000007950	Abhd8	0.160947	0.111509	0.0422209	0.00702647	0.11	0.087	1	0
ENSMUSG00000027365	Trpm7	0.160974	0.0964144	0.0570195	0.0145735	0.603	0.554667	1	0
ENSMUSG00000058897	Col25a1	0.161097	0.0537829	0.00171329	0.00323183	0.335	0.375667	1	0
ENSMUSG00000036980	Taf6	0.16114	0.0554645	0.0416181	0.00297575	0.106	0.084	1	0	SFARI					2	0
ENSMUSG00000005899	Smpd4	0.161279	0.16339	0.060409	0.0175638	0.309	0.272667	1	0
ENSMUSG00000028496	Mllt3	0.161528	0.0799094	-0.0611637	0.0169512	0.779	0.823667	1	0
ENSMUSG00000036381	P2ry14	0.161703	0.0838854	-0.0630246	0.00559816	0.271	0.302667	1	0
ENSMUSG00000003184	Irf3	0.162062	0.0481786	0.0283134	0.00504659	0.128	0.102667	1	0
ENSMUSG00000039372	Marchf4	0.162099	0.173501	-0.0720568	0.0200827	0.269	0.302	1	0
ENSMUSG00000002341	Ncan	0.162512	0.224164	0.045608	0.0230558	0.188	0.153667	1	0
ENSMUSG00000016018	Mtrex	0.162604	0.0364012	0.0431279	0.00705646	0.282	0.248333	1	0
ENSMUSG00000025133	Ints4	0.162654	0.118845	-0.0482638	0.00837635	0.119	0.145333	1	0
ENSMUSG00000003847	Nfat5	0.162658	0.180957	-0.0627432	0.0350703	0.579	0.637667	1	0
ENSMUSG00000037514	Pank2	0.162664	0.121091	-0.0357277	0.0293993	0.318	0.361	1	0
ENSMUSG00000087403	Kantr	0.162774	0.0537818	0.0617988	0.0054987	0.315	0.281333	1	0
ENSMUSG00000074235	Gm10649	0.162947	0.160691	-0.0398519	0.0193981	0.184	0.220667	1	0
ENSMUSG00000022261	Sdc2	0.162949	0.158276	0.059693	0.0139585	0.275	0.240667	1	0	SFARI					2	0
ENSMUSG00000032324	Tspan3	0.163392	0.14728	0.035118	0.018569	0.282	0.243	1	0
ENSMUSG00000036270	Edc4	0.163715	0.173251	0.0583262	0.0294905	0.228	0.191	1	0
ENSMUSG00000049184	Purg	0.163756	0.0992957	-0.0671097	0.00442142	0.318	0.353667	1	0
ENSMUSG00000025158	Rfng	0.16378	0.0779096	0.0380741	0.00509859	0.119	0.0956667	1	0
ENSMUSG00000031333	Abcb7	0.163979	0.132717	-0.0395593	0.0158927	0.229	0.265667	1	0
ENSMUSG00000021023	Prorp	0.164094	0.0729093	0.0436262	0.00298381	0.103	0.0813333	1	0
ENSMUSG00000034675	Dbn1	0.164166	0.218816	0.0597831	0.0310231	0.391	0.349	1	0
ENSMUSG00000029916	Agk	0.164339	0.124719	-0.0425138	0.0205145	0.19	0.221333	1	0
ENSMUSG00000015882	Lcorl	0.164495	0.134788	-0.0711653	0.0270736	0.331	0.362	1	0
ENSMUSG00000003929	Zfp81	0.164655	0.142625	0.0381136	0.0189813	0.179	0.148	1	0
ENSMUSG00000031451	Gas6	0.164856	0.241305	0.0359715	0.0201956	0.113	0.0846667	1	0
ENSMUSG00000036955	Kifbp	0.164975	0.0991422	-0.0312823	0.0077426	0.106	0.131333	1	0
ENSMUSG00000038371	Sbf2	0.164985	0.132764	-0.0516347	0.0220421	0.76	0.792667	1	0
ENSMUSG00000013160	Atp6v0d1	0.165024	0.117434	0.0455131	0.019088	0.188	0.157333	1	0
ENSMUSG00000053768	Chchd3	0.165095	0.134531	-0.0684811	0.0210085	0.522	0.557	1	0
ENSMUSG00000052139	Babam2	0.165168	0.168993	-0.0717133	0.0381227	0.372	0.409667	1	0
ENSMUSG00000064329	Scn1a	0.16569	0.134629	0.0721628	0.0326699	0.744	0.720333	1	0	SFARI					1	1
ENSMUSG00000042992	Borcs5	0.165941	0.130374	0.0512929	0.0115007	0.126	0.1	1	0
ENSMUSG00000001289	Pfdn5	0.166082	0.0993538	0.0328339	0.0097613	0.104	0.0816667	1	0
ENSMUSG00000015889	Lta4h	0.166192	0.0673057	0.0292272	0.00553467	0.162	0.133667	1	0
ENSMUSG00000027223	Mapk8ip1	0.166348	0.0278587	0.0363789	0.00698696	0.229	0.197333	1	0	SFARI					3	0
ENSMUSG00000038085	Cnbd2	0.166464	0.157397	0.034492	0.0146064	0.113	0.088	1	0
ENSMUSG00000022237	Ankrd33b	0.166506	0.197704	0.0733948	0.0347351	0.394	0.353667	1	0
ENSMUSG00000027544	Nfatc2	0.166627	0.0663338	0.0331119	0.0167691	0.203	0.172333	1	0
ENSMUSG00000039419	Cntnap2	0.166805	0.0911795	0.0701714	0.0250435	0.996	0.999667	1	0	SFARI;EAGLE		Refuted	—	Discordant	2	1
ENSMUSG00000032485	Scap	0.166849	0.118911	0.0714483	0.0143316	0.191	0.162333	1	0
ENSMUSG00000020315	Sptbn1	0.166909	0.230706	-0.0860119	0.0302257	0.849	0.877	1	0	SFARI					2	1
ENSMUSG00000039000	Ube3c	0.16695	0.030141	-0.0433427	0.00840823	0.485	0.525333	1	0	SFARI					2	0
ENSMUSG00000045210	Vcpip1	0.167081	0.128142	0.0400763	0.0146077	0.163	0.135	1	0
ENSMUSG00000038324	Trpc4ap	0.167141	0.18276	-0.0649617	0.0173137	0.253	0.288333	1	0
ENSMUSG00000018209	Stk4	0.167291	0.199516	-0.0476504	0.0238796	0.137	0.167	1	0
ENSMUSG00000024158	Hagh	0.167434	0.111619	0.0338632	0.00954379	0.113	0.0896667	1	0
ENSMUSG00000021103	Mnat1	0.167525	0.0894143	-0.0406879	0.00565446	0.354	0.394	1	0
ENSMUSG00000037935	Smarce1	0.167642	0.140651	-0.0298531	0.0144874	0.11	0.137	1	0
ENSMUSG00000114704	Gm48003	0.167863	0.0484189	0.0540738	0.0019484	0.25	0.22	1	0
ENSMUSG00000037669	Ldah	0.167888	0.152975	0.0576138	0.0270698	0.234	0.197667	1	0
ENSMUSG00000038705	Gmeb2	0.168306	0.105118	-0.0365184	0.0057029	0.103	0.127333	1	0
ENSMUSG00000011306	Sugp1	0.168485	0.187006	0.0405897	0.0251137	0.199	0.164333	1	0
ENSMUSG00000032343	Impg1	0.168562	0.169726	-0.0568215	0.0374046	0.106	0.134667	1	0
ENSMUSG00000036452	Arhgap26.1	0.168623	0.0670834	0.0735022	0.0108547	0.718	0.688667	1	0
ENSMUSG00000033282	Rpgrip1l	0.168953	0.0904978	-0.0411634	0.0123285	0.203	0.235333	1	0
ENSMUSG00000042605	Atxn2	0.168968	0.0579324	-0.0650074	0.00965524	0.416	0.449333	1	0
ENSMUSG00000039087	Rreb1	0.169049	0.0452368	0.0441862	0.00735405	0.166	0.139667	1	0
ENSMUSG00000036291	Ap5m1	0.169066	0.085374	-0.0291523	0.00910872	0.113	0.139333	1	0
ENSMUSG00000028106	Rprd2	0.169237	0.136906	0.0485249	0.0141293	0.412	0.371	1	0
ENSMUSG00000038023	Atp6v0a2	0.169308	0.181384	0.0665171	0.0152799	0.2	0.17	1	0	SFARI					2	0
ENSMUSG00000024188	Luc7l	0.169618	0.115617	-0.0438631	0.011529	0.232	0.267667	1	0
ENSMUSG00000008604	Ubqln4	0.169957	0.245703	0.0528711	0.021806	0.141	0.111	1	0
ENSMUSG00000054453	Sytl5	0.170051	0.103875	0.060499	0.0165151	0.254	0.224	1	0
ENSMUSG00000032839	Trpc1	0.170177	0.131632	0.0703602	0.0266519	0.454	0.417	1	0
ENSMUSG00000022811	Zfp148	0.170266	0.115341	-0.0761146	0.0184823	0.55	0.578667	1	0
ENSMUSG00000038909	Kat7	0.17027	0.0809931	-0.0437699	0.00538992	0.137	0.163333	1	0
ENSMUSG00000029060	Mib2	0.17034	0.137662	0.0421355	0.0110244	0.141	0.115333	1	0
ENSMUSG00000024294	Mib1	0.170717	0.153896	-0.0445466	0.0250335	0.475	0.523	1	0	SFARI;TADA	0.0702237				2	0
ENSMUSG00000026610	Esrrg	0.170897	0.253171	-0.0973518	0.0552498	0.5	0.555667	1	0
ENSMUSG00000032097	Ddx6	0.170993	0.0709258	0.0698415	0.0125118	0.347	0.314667	1	0
ENSMUSG00000078427	Sarnp	0.171076	0.145145	-0.0637521	0.00799729	0.234	0.263	1	0
ENSMUSG00000024614	Tmx3	0.171196	0.0130625	-0.0471424	0.00549274	0.263	0.295333	1	0
ENSMUSG00000050821	Fam131a	0.171373	0.102427	0.0373934	0.00826562	0.135	0.109667	1	0
ENSMUSG00000113902	Ndufb1	0.171505	0.243119	0.0562015	0.0282678	0.171	0.138	1	0
ENSMUSG00000003814	Calr	0.171631	0.150188	0.0356598	0.0163532	0.315	0.274	1	0
ENSMUSG00000015214	Mtmr1	0.171754	0.0705771	0.0529955	0.00884391	0.312	0.279	1	0
ENSMUSG00000029148	Nrbp1	0.171808	0.176972	0.0400428	0.0139016	0.118	0.093	1	0
ENSMUSG00000017639	Rab11fip4	0.171817	0.185228	0.0432592	0.0215079	0.24	0.204	1	0
ENSMUSG00000039086	Ss18l1	0.171909	0.118702	0.0361286	0.00687856	0.1	0.078	1	0
ENSMUSG00000020589	Cyria	0.171943	0.140663	-0.0656696	0.0337825	0.437	0.470667	1	0
ENSMUSG00000002064	Sdf2	0.171949	0.110121	0.0420339	0.00771093	0.129	0.105333	1	0
ENSMUSG00000041552	Ptchd1	0.172055	0.0524013	-0.0374967	0.0160015	0.253	0.288	1	0	SFARI;EAGLE		No scorable evidence	0	Discordant	1	0
ENSMUSG00000021819	Zswim8	0.172571	0.18539	0.0556061	0.0249136	0.24	0.206	1	0
ENSMUSG00000028556	Dock7	0.172789	0.123054	-0.048356	0.0220527	0.509	0.541	1	0
ENSMUSG00000001783	Rtcb	0.172879	0.0495077	0.0290716	0.00391506	0.103	0.0813333	1	0
ENSMUSG00000021240	Abcd4	0.172955	0.104081	0.0363917	0.00699811	0.106	0.083	1	0
[truncated: 4,247 more rows]

## Sheet: D2_MSN
ensembl	gene	p_val.mean	p_val.std	avg_log2FC.mean	avg_log2FC.std	pct.1.mean	pct.2.mean	padj.mean	padj.std	ASD.status	TADA.FDR	EAGLE.annotation	EAGLE.score	EAGLE.concordance	SFARI.score	SFARI.syndromic
ENSMUSG00000020719	Ddx5	5.32992e-27	9.1875e-27	0.435205	0.0218314	0.995	0.955333	1.52734e-22	2.63277e-22
ENSMUSG00000063511	Snrnp70	9.95847e-20	1.67927e-19	0.431832	0.0187963	0.854	0.708667	2.8537e-15	4.81211e-15
ENSMUSG00000032936	Camkv	1.67617e-17	2.70956e-17	0.423519	0.0195822	0.846	0.715667	4.80322e-13	7.76453e-13
ENSMUSG00000019505	Ubb	6.57937e-17	1.13565e-16	0.472014	0.0385791	0.522	0.283	1.88538e-12	3.25433e-12
ENSMUSG00000007783	Cpt1c	1.26001e-14	2.18239e-14	0.406117	0.0453439	0.647	0.424667	3.61068e-10	6.25387e-10
ENSMUSG00000019039	Dalrd3	8.63784e-14	8.40768e-14	0.366547	0.0209817	0.619	0.417	2.47526e-09	2.4093e-09
ENSMUSG00000001270	Ckb	9.93516e-14	1.20846e-13	0.515409	0.0100737	0.844	0.735	2.84702e-09	3.46295e-09
ENSMUSG00000027419	Pcsk2	1.72132e-13	2.98003e-13	0.30228	0.0289718	0.993	0.986667	4.93262e-09	8.53959e-09
ENSMUSG00000036564	Ndrg4	2.49026e-13	2.03852e-13	0.352491	0.0136896	0.791	0.662333	7.13608e-09	5.84159e-09
ENSMUSG00000030695	Aldoa	6.24472e-13	5.04392e-13	0.377881	0.0106455	0.488	0.299667	1.78949e-08	1.44538e-08
ENSMUSG00000001983	Taco1	1.31813e-12	2.27433e-12	0.303371	0.020267	0.442	0.243333	3.77722e-08	6.51732e-08
ENSMUSG00000021910	Nisch	2.04924e-12	2.16102e-12	0.357729	0.00717909	0.616	0.438667	5.8723e-08	6.19262e-08
ENSMUSG00000043432	Leng9	3.87681e-12	3.59194e-12	0.251133	0.011242	0.32	0.148333	1.11094e-07	1.02931e-07
ENSMUSG00000021448	Shc3	1.61692e-11	2.51005e-11	-0.29241	0.0140636	0.286	0.479	4.63344e-07	7.19279e-07
ENSMUSG00000034135	Sik3	3.8012e-11	5.73378e-11	-0.400001	0.0321171	0.8	0.872667	1.08927e-06	1.64307e-06
ENSMUSG00000010086	Rnf112	3.849e-11	4.40497e-11	0.316743	0.00916606	0.591	0.421333	1.10297e-06	1.26229e-06
ENSMUSG00000037703	Lzts3	5.95466e-11	6.96468e-11	0.266002	0.00308306	0.462	0.286333	1.70637e-06	1.9958e-06
ENSMUSG00000097391	Mirg	8.07709e-11	1.33556e-10	0.365134	0.023177	0.74	0.602333	2.31457e-06	3.82718e-06
ENSMUSG00000031425	Plp1	1.40681e-09	2.42435e-09	-0.686179	0.0666654	0.055	0.172667	4.03136e-05	6.94723e-05
ENSMUSG00000034818	Celf5	2.06968e-09	2.81039e-09	0.259588	0.0147089	0.598	0.431	5.93087e-05	8.05347e-05
ENSMUSG00000033981	Gria2	2.88839e-09	2.63875e-09	0.177201	0.0120979	1	0.999333	8.27697e-05	7.5616e-05	SFARI;EAGLE;TADA	0.0666362	Definitive	12	Concordant	1	0
ENSMUSG00000035545	Leng8	6.30684e-09	7.71857e-09	0.26308	0.0139903	0.445	0.284667	0.000180729	0.000221183
ENSMUSG00000097545	Mir124a-1hg	6.888e-09	5.36723e-09	0.303093	0.00514589	0.684	0.561667	0.000197383	0.000153803
ENSMUSG00000041216	Clvs1	9.69941e-09	1.627e-08	-0.342446	0.0456882	0.776	0.847333	0.000277946	0.000466233
ENSMUSG00000025212	Sfxn3	5.72433e-08	7.99153e-08	0.205131	0.0133953	0.273	0.144	0.00164036	0.00229005
ENSMUSG00000034892	Rps29	5.82887e-08	8.9205e-08	0.197759	0.0117563	0.257	0.127333	0.00167032	0.00255626
ENSMUSG00000036529	Sbf1	7.16094e-08	3.35898e-08	0.190369	0.00813942	0.28	0.154	0.00205204	0.00096255	SFARI					2	0
ENSMUSG00000021268	Meg3	7.74534e-08	9.68958e-08	0.153801	0.0170413	0.998	1	0.00221951	0.00277665
ENSMUSG00000096768	Gm47283	1.13067e-07	1.66788e-07	0.234247	0.0106988	0.48	0.327667	0.00324005	0.00477949
ENSMUSG00000002459	Rgs20	1.25196e-07	1.97488e-07	-0.282252	0.0099885	0.72	0.814	0.00358762	0.00565923
ENSMUSG00000035885	Cox8a	1.41911e-07	2.01879e-07	0.280323	0.0119325	0.359	0.225	0.00406661	0.00578505
ENSMUSG00000015656	Hspa8	1.41994e-07	7.02331e-08	0.267833	0.0105886	0.498	0.362	0.00406898	0.0020126
ENSMUSG00000062044	Lmtk3	1.45771e-07	2.18013e-07	0.202519	0.028014	0.381	0.235	0.00417721	0.00624737	SFARI					3	0
ENSMUSG00000058740	Kcnt1	1.48363e-07	2.55576e-07	0.326281	0.0495204	0.68	0.567333	0.00425149	0.00732379
ENSMUSG00000000632	Sez6	1.53403e-07	2.15173e-07	0.309048	0.0486719	0.715	0.609333	0.00439592	0.00616601
ENSMUSG00000057666	Gapdh	2.23042e-07	2.38917e-07	0.270951	0.00691955	0.492	0.354667	0.00639148	0.0068464
ENSMUSG00000031673	Cdh11	2.39708e-07	2.39304e-07	-0.337824	0.0188818	0.571	0.668	0.00686906	0.0068575	SFARI					2	0
ENSMUSG00000040415	Dtx3	2.50426e-07	1.81576e-07	0.223792	0.00860528	0.442	0.303667	0.00717621	0.00520325
ENSMUSG00000023452	Pisd	2.82047e-07	2.75095e-07	0.134107	0.00467147	0.154	0.0613333	0.00808235	0.00788311
ENSMUSG00000045349	Sh2d5	3.79925e-07	6.23349e-07	0.294589	0.0162592	0.53	0.403	0.0108871	0.0178627
ENSMUSG00000030854	Ptpn5	4.5283e-07	7.76948e-07	0.263916	0.0298999	0.874	0.799333	0.0129763	0.0222642
ENSMUSG00000031865	Dctn1	5.50825e-07	4.37996e-07	0.200218	0.00869279	0.417	0.279333	0.0157844	0.0125512
ENSMUSG00000024238	Zeb1	5.76115e-07	8.83469e-07	-0.264605	0.0103515	0.858	0.902	0.0165092	0.0253167
ENSMUSG00000059921	Unc5c	5.78107e-07	6.91274e-07	-0.333637	0.0469348	0.624	0.727667	0.0165662	0.0198091
ENSMUSG00000045573	Penk	6.98506e-07	1.03782e-06	0.257684	0.0176009	0.987	0.969667	0.0200164	0.0297397
ENSMUSG00000037351	Actr1b	7.26314e-07	6.29645e-07	0.203034	0.00899754	0.336	0.209	0.0208132	0.0180431
ENSMUSG00000004933	Matk	7.83839e-07	1.04751e-06	0.229089	0.0121603	0.497	0.37	0.0224617	0.0300174
ENSMUSG00000020018	Snrpf	7.97675e-07	6.43482e-07	0.111887	0.00478308	0.116	0.039	0.0228582	0.0184396
ENSMUSG00000022553	Maf1	1.12528e-06	1.28195e-06	0.112643	0.00859718	0.134	0.049	0.0322459	0.0367356
ENSMUSG00000033585	Ndn	1.21845e-06	1.18091e-06	0.130324	0.00739847	0.116	0.0383333	0.0349158	0.0338401
ENSMUSG00000046709	Mapk10	1.62616e-06	2.1302e-06	-0.241848	0.0163273	0.811	0.873333	0.0465993	0.061043
ENSMUSG00000028833	Ncdn	1.97396e-06	2.99432e-06	0.17639	0.0213592	0.353	0.221333	0.0565659	0.0858054
ENSMUSG00000003346	Abhd17a	2.79871e-06	4.73655e-06	0.139405	0.0196383	0.164	0.07	0.0801997	0.135731
ENSMUSG00000038518	Jarid2	3.2655e-06	5.59653e-06	-0.277497	0.0319982	0.73	0.806333	0.093576	0.160374	SFARI					2	0
ENSMUSG00000026204	Ptprn	3.33214e-06	4.59849e-06	0.26614	0.0326819	0.776	0.684333	0.0954859	0.131774
ENSMUSG00000058239	Usf2	3.537e-06	4.46832e-06	0.122765	0.00779985	0.154	0.067	0.101356	0.128044
ENSMUSG00000031748	Gnao1	3.78374e-06	5.66164e-06	-0.240531	0.0188477	0.664	0.759667	0.108427	0.16224
ENSMUSG00000025225	Nfkb2	4.05297e-06	7.00519e-06	0.13994	0.0197661	0.171	0.0713333	0.116142	0.200741
ENSMUSG00000001415	Smg5	4.33968e-06	1.40806e-06	0.216556	0.00266937	0.397	0.281333	0.124358	0.0403493
ENSMUSG00000020189	Osbpl8	5.29549e-06	1.9342e-06	-0.229852	0.00324653	0.947	0.944	0.151748	0.0554263
ENSMUSG00000008658	Rbfox1	6.29364e-06	6.41446e-06	-0.134129	0.00967011	1	1	0.180351	0.183813	SFARI					2	0
ENSMUSG00000013997	Nit1	7.01142e-06	1.06002e-05	0.151905	0.0134559	0.224	0.122667	0.200919	0.303759
ENSMUSG00000046922	Gpr6	7.29133e-06	1.07273e-05	0.192252	0.0196616	0.47	0.339	0.20894	0.307401
ENSMUSG00000029714	Gigyf1	7.3563e-06	5.5848e-06	0.149734	0.00830338	0.228	0.129	0.210802	0.160038	SFARI;EAGLE;TADA	4.94e-14	Definitive	17.25	Concordant	1	0
ENSMUSG00000058152	Chsy3	7.41343e-06	7.74285e-06	-0.234702	0.0184315	0.886	0.925333	0.212439	0.221879
ENSMUSG00000053465	Hs6st3	7.70272e-06	9.79926e-06	-0.252672	0.0426229	0.93	0.970333	0.220729	0.280808
ENSMUSG00000057329	Bcl2	7.86563e-06	1.34491e-05	-0.259589	0.0271817	0.334	0.461667	0.225398	0.385397
ENSMUSG00000023092	Fhl1	8.15682e-06	9.28617e-06	0.150085	0.00596238	0.242	0.139	0.233742	0.266104
ENSMUSG00000026575	Nme7	8.52839e-06	6.95708e-06	0.192416	0.0152867	0.427	0.308	0.24439	0.199362
ENSMUSG00000029580	Actb	9.05671e-06	8.50716e-06	0.241609	0.0200551	0.616	0.489	0.259529	0.243781	SFARI;EAGLE		Limited	1	Discordant	1	1
ENSMUSG00000040907	Atp1a3	9.46237e-06	1.43104e-05	0.228584	0.0280864	0.531	0.408333	0.271154	0.410078	SFARI					2	1
ENSMUSG00000079157	Nalf1	9.75474e-06	8.27037e-06	-0.257182	0.0372309	0.606	0.728	0.279532	0.236996
ENSMUSG00000090733	Rps27	1.0225e-05	1.76473e-05	0.174485	0.0191964	0.219	0.111333	0.293009	0.5057
ENSMUSG00000004267	Eno2	1.12021e-05	1.91921e-05	0.233139	0.0237555	0.425	0.302	0.321007	0.54997
ENSMUSG00000107872	Gm44511	1.13058e-05	7.94462e-06	0.200321	0.00987052	0.565	0.447667	0.32398	0.227661
ENSMUSG00000030428	Ttyh1	1.38457e-05	1.18273e-05	0.233927	0.0112385	0.581	0.485667	0.396762	0.338923
ENSMUSG00000041607	Mbp	1.43681e-05	1.17085e-05	-0.264571	0.0538117	0.139	0.23	0.411732	0.335519
ENSMUSG00000023150	Ivns1abp	1.45522e-05	1.22373e-05	0.235837	0.0265361	0.763	0.680333	0.417007	0.350672
ENSMUSG00000036427	Gpi1	1.49981e-05	1.76501e-05	0.20772	0.00901008	0.425	0.31	0.425521	0.498407
ENSMUSG00000041697	Cox6a1	1.60815e-05	2.64862e-05	0.214	0.0169403	0.344	0.225333	0.348529	0.564574
ENSMUSG00000034751	Mast4	1.61224e-05	2.26996e-05	-0.223778	0.0313361	0.046	0.118333	0.393145	0.532486
ENSMUSG00000027674	Pex5l	1.6557e-05	2.79448e-05	-0.21646	0.0199935	0.204	0.320667	0.341435	0.570404
ENSMUSG00000060924	Csmd1	1.68749e-05	2.84195e-05	-0.133295	0.0228009	0.998	1	0.342293	0.56974	SFARI					2	0
ENSMUSG00000092341	Malat1	1.71738e-05	1.46148e-05	-0.0889067	0.00919764	1	1	0.492133	0.418802
ENSMUSG00000113608	Gm48715	1.76849e-05	2.69043e-05	0.148141	0.0276991	0.22	0.123667	0.374448	0.541779
ENSMUSG00000037996	Slc24a2	1.76969e-05	3.01034e-05	-0.236416	0.0251839	0.907	0.950667	0.339385	0.57212	SFARI					2	0
ENSMUSG00000016319	Slc25a5	1.86057e-05	2.8906e-05	0.194472	0.0161654	0.257	0.155333	0.370214	0.546444
ENSMUSG00000033565	Rbfox2	2.0952e-05	1.4302e-05	-0.210567	0.0128228	0.763	0.814	0.57612	0.367862
ENSMUSG00000035781	R3hdm4	2.39526e-05	3.81501e-05	0.165008	0.0124115	0.311	0.199333	0.370156	0.545546
ENSMUSG00000038418	Egr1	2.46432e-05	4.21881e-05	0.237106	0.0349728	0.351	0.234333	0.338797	0.572633
ENSMUSG00000027406	Idh3b	2.77785e-05	4.78021e-05	0.214726	0.039388	0.422	0.289333	0.336773	0.574393
ENSMUSG00000044667	Plppr4	2.79858e-05	1.79587e-05	0.216122	0.0150708	0.833	0.761667	0.7371	0.455356
ENSMUSG00000022489	Pde1b	2.91131e-05	3.59957e-05	0.18277	0.0114227	0.768	0.69	0.493053	0.442458
ENSMUSG00000031760	Mt3	2.9194e-05	1.4655e-05	0.120237	0.0114539	0.149	0.0736667	0.783888	0.374317
ENSMUSG00000031428	Zcchc18	3.2532e-05	1.52914e-05	0.225341	0.00874763	0.493	0.397	0.809153	0.275845
ENSMUSG00000055254	Ntrk2	4.02236e-05	5.65824e-05	-0.22624	0.00968241	0.813	0.861	0.480759	0.477602	SFARI						1
ENSMUSG00000025393	Atp5b	4.12061e-05	4.81368e-05	0.200698	0.0125054	0.447	0.339	0.607508	0.491666
ENSMUSG00000003435	Supt5	4.24468e-05	4.40493e-05	0.156169	0.0250703	0.339	0.230333	0.691025	0.535161
ENSMUSG00000020015	Cdk17	4.49925e-05	6.42189e-05	0.200892	0.0299544	0.891	0.852333	0.490222	0.498881
ENSMUSG00000016933	Plcg1	5.17426e-05	8.96045e-05	0.147796	0.0358015	0.232	0.119667	0.333513	0.577195
ENSMUSG00000054976	Nyap2	5.33014e-05	1.97796e-05	-0.274069	0.014438	0.55	0.637333	0.969119	0.0534866
ENSMUSG00000009555	Cdk9	5.36281e-05	3.16077e-05	0.147229	0.00344428	0.268	0.173333	0.872491	0.220853
ENSMUSG00000024642	Tle4	6.14227e-05	0.000100587	-0.291468	0.059358	0.859	0.887333	0.397935	0.530306
ENSMUSG00000020163	Uqcr11	7.28312e-05	6.7262e-05	0.117351	0.0179359	0.162	0.0823333	0.670632	0.570482
ENSMUSG00000031442	Mcf2l	7.34035e-05	0.000112486	0.210791	0.0298468	0.558	0.445	0.498434	0.49704
ENSMUSG00000011257	Pabpc4	7.48575e-05	0.000102849	0.147566	0.0122346	0.336	0.224	0.637129	0.471689
ENSMUSG00000018770	Atp5g3	7.86558e-05	4.7027e-05	0.132034	0.00829215	0.227	0.137667	0.905881	0.163019
ENSMUSG00000025151	Maged1	7.94985e-05	8.2482e-05	0.171487	0.00706313	0.386	0.278667	0.77281	0.393505
ENSMUSG00000057322	Rpl38	8.15055e-05	0.000106508	0.111324	0.023777	0.159	0.078	0.668334	0.574462
ENSMUSG00000063524	Eno1	8.27779e-05	0.000120743	0.142988	0.0296044	0.215	0.119667	0.591285	0.523837
ENSMUSG00000022208	Jph4	9.40219e-05	9.90561e-05	0.181826	0.0138405	0.465	0.357667	0.825133	0.302879
ENSMUSG00000089832	Shkbp1	9.58325e-05	0.000148367	0.114722	0.0202946	0.154	0.0733333	0.531645	0.502019
ENSMUSG00000025279	Dnase1l3	0.00010365	8.92162e-05	0.185746	0.0138939	0.237	0.147667	0.724067	0.47793
ENSMUSG00000016349	Eef1a2	0.000108744	7.26307e-05	0.145484	0.00833543	0.233	0.148	0.905597	0.16351	SFARI						1
ENSMUSG00000061718	Ppp1r1b	0.000113028	0.000184817	0.199726	0.034149	0.528	0.412333	0.455051	0.497696	SFARI					2	0
ENSMUSG00000015476	Prrt1	0.000127156	0.000179165	0.152571	0.0170896	0.334	0.23	0.711627	0.499476
ENSMUSG00000027405	Nop56	0.000129945	0.000104769	0.13275	0.00664572	0.23	0.143333	0.796187	0.353015
ENSMUSG00000024830	Rps6kb2	0.000133548	0.000167826	0.155215	0.0147393	0.323	0.222333	0.974007	0.045022
ENSMUSG00000027351	Spred1	0.000135443	0.000103029	-0.201497	0.011903	0.661	0.716667	0.842196	0.273324
ENSMUSG00000029713	Gnb2	0.000137212	0.000226395	0.174466	0.026658	0.419	0.304333	0.458385	0.497904	SFARI						1
ENSMUSG00000038351	Sgsm2	0.000139579	0.000235602	0.160128	0.0308027	0.394	0.276	0.401344	0.522598
ENSMUSG00000059278	Naa38	0.000140931	0.000168759	0.086132	0.00601446	0.109	0.0483333	1	0
ENSMUSG00000024085	Man2a1	0.000151665	0.000229262	-0.216953	0.0251028	0.467	0.545667	0.704759	0.396731
ENSMUSG00000030432	Rpl28	0.000162182	0.000101403	0.114337	0.00424948	0.184	0.106667	1	0
ENSMUSG00000018474	Chd3	0.000165399	0.00028471	0.179632	0.0273465	0.363	0.251	0.352862	0.560478	SFARI					1	1
ENSMUSG00000071866	Ppia	0.000177177	0.00015318	0.169315	0.0287656	0.359	0.258333	0.716168	0.491612
ENSMUSG00000057421	Las1l	0.000178341	0.00030334	0.18226	0.028912	0.348	0.237333	0.394765	0.530973	SFARI					3	0
ENSMUSG00000101872	Gm29237	0.000185571	0.000303886	0.149009	0.0166947	0.209	0.122333	0.527445	0.447476
ENSMUSG00000066189	Cacng3	0.000188565	0.000193943	-0.171233	0.0143047	0.548	0.637667	0.767978	0.401873
ENSMUSG00000039001	Rps21	0.000201664	0.000287603	0.143436	0.0121319	0.217	0.133	0.836095	0.283892
ENSMUSG00000032174	Icam5	0.000202569	0.000172364	0.176887	0.0149266	0.439	0.338	0.702012	0.516131
ENSMUSG00000033307	Mif	0.000203662	0.000186067	0.119359	0.026412	0.199	0.112667	0.671546	0.568898
ENSMUSG00000035632	Cnot3	0.000204518	0.000242967	0.132153	0.00925122	0.363	0.256333	0.864391	0.234881	SFARI;EAGLE;TADA	0.00572418	Limited	5.6	Discordant	1	1
ENSMUSG00000037138	Aff3	0.000210036	0.000249282	-0.214145	0.0182049	0.849	0.872	0.962232	0.0654162
ENSMUSG00000057738	Sptan1	0.000210942	0.000241661	0.191179	0.0238581	0.662	0.571	0.721036	0.48318
ENSMUSG00000062825	Actg1	0.000213044	0.00034409	0.175752	0.0247932	0.354	0.25	0.611071	0.514668
ENSMUSG00000090137	Uba52	0.000229975	0.000197203	0.0808492	0.0104939	0.111	0.051	0.827203	0.299293
ENSMUSG00000072772	Grcc10	0.000244128	0.000182731	0.0850041	0.00528015	0.101	0.045	1	0	SFARI						1
ENSMUSG00000032946	Rasgrp2	0.000271729	0.000260181	0.144088	0.0170261	0.49	0.387	1	0
ENSMUSG00000034730	Adgrb1	0.000274302	0.000387009	0.175913	0.0306869	0.614	0.502333	0.689259	0.53822
ENSMUSG00000015748	Prpf3	0.000275656	0.000338878	0.145846	0.0251696	0.283	0.186333	0.679296	0.555475
ENSMUSG00000029328	Hnrnpdl	0.000283329	0.000184696	0.148949	0.00510143	0.601	0.498333	1	0
ENSMUSG00000037428	Vgf	0.000283954	6.66629e-05	0.160411	0.00828744	0.253	0.172	1	0
ENSMUSG00000056185	Snx32	0.000290336	0.000163418	0.146307	0.00221233	0.301	0.212333	1	0
ENSMUSG00000061028	Clasrp	0.00029226	0.00045346	0.14332	0.0315364	0.214	0.125333	0.668468	0.574231
ENSMUSG00000027466	Rbck1	0.000297201	0.000162608	0.100509	0.00596238	0.217	0.135667	1	0
ENSMUSG00000034265	Zdhhc14	0.000297564	0.000460575	-0.22878	0.0166145	0.816	0.856	0.748304	0.435951
ENSMUSG00000024325	Ring1	0.000312521	0.000272415	0.11921	0.0181069	0.214	0.132333	0.907292	0.160575
ENSMUSG00000034902	Pip5k1c	0.000313197	0.000521777	0.120536	0.0171448	0.179	0.1	0.561727	0.391224
ENSMUSG00000026034	Clk1	0.000315159	0.000319175	0.17159	0.0367517	0.77	0.703333	0.719059	0.486604
ENSMUSG00000039218	Srrm2	0.000319034	0.00042318	0.159306	0.0162645	0.856	0.799667	1	0	SFARI					2	1
ENSMUSG00000093674	Rpl41	0.000322001	0.000481717	0.150788	0.0240489	0.382	0.283	0.964251	0.0619188
ENSMUSG00000005871	Apc	0.000331248	0.000284405	-0.178237	0.0144268	0.606	0.691333	1	0
ENSMUSG00000039488	Cntn5	0.000334314	0.000213624	-0.219384	0.00625092	0.965	0.972667	1	0	SFARI					2	0
ENSMUSG00000013236	Ptprs	0.000340874	0.000583735	0.188928	0.0399901	0.523	0.395333	0.4071	0.52507
ENSMUSG00000006930	Hap1	0.000343499	0.00058706	0.178967	0.0344433	0.227	0.133333	0.420648	0.518397
ENSMUSG00000026959	Grin1	0.00034399	0.00031177	0.180581	0.0157241	0.849	0.805333	1	0	SFARI					1	0
ENSMUSG00000038349	Plcl1	0.000344943	0.000356671	-0.404587	0.0353689	0.295	0.374	0.793193	0.3582
ENSMUSG00000113136	Gm19951	0.000349354	0.00037114	0.109708	0.0168712	0.152	0.0803333	0.680899	0.5527
ENSMUSG00000090071	Cdk5r2	0.000378198	0.000628645	0.103095	0.0186392	0.116	0.0493333	0.626718	0.544005
ENSMUSG00000029632	Ndufa4	0.000380785	0.000548767	0.154565	0.0167727	0.26	0.174333	0.986738	0.0229706
ENSMUSG00000040249	Lrp1	0.000380915	0.000586947	0.159588	0.0301606	0.399	0.294	0.981093	0.0327481	SFARI					2	0
ENSMUSG00000002102	Psmc3	0.000381404	0.000559516	0.091821	0.01205	0.154	0.0826667	1	0
ENSMUSG00000037112	Sik2	0.000383441	0.000494005	-0.240866	0.024799	0.541	0.616	0.856979	0.24772
ENSMUSG00000038121	Fam210a	0.00038623	0.000501506	0.122292	0.0158582	0.205	0.126	0.939644	0.104539
ENSMUSG00000104960	Snhg8	0.000397675	0.00031021	0.0982022	0.00721433	0.126	0.0646667	1	0
ENSMUSG00000055692	Tmem191c	0.00040096	0.000450986	0.158553	0.0213945	0.409	0.314667	0.892563	0.186086
ENSMUSG00000024146	Cript	0.00040744	0.000292237	0.0883859	0.00588723	0.134	0.0713333	1	0
ENSMUSG00000027298	Tyro3	0.000421045	0.000531923	0.143413	0.0260437	0.265	0.176333	0.705171	0.510659
ENSMUSG00000000308	Ckmt1	0.000426469	0.00014322	0.104137	0.00215972	0.164	0.096	1	0
ENSMUSG00000090841	Myl6	0.000428004	0.00039134	0.12175	0.0192954	0.243	0.159	0.807401	0.33359
ENSMUSG00000061518	Cox5b	0.000431646	0.000408146	0.130467	0.0093475	0.232	0.151333	1	0
ENSMUSG00000027134	Lpcat4	0.00044508	0.000389349	0.108166	0.0260992	0.21	0.125333	0.674016	0.56462
ENSMUSG00000031837	Necab2	0.000448186	0.000544258	0.118747	0.0210278	0.321	0.223333	0.91804	0.141959
ENSMUSG00000030590	Fam98c	0.000471438	0.000618938	0.0876969	0.00787455	0.123	0.062	1	0	SFARI					2	0
ENSMUSG00000044340	Phlpp1	0.00048964	0.000819681	-0.23908	0.034086	0.44	0.525333	0.647729	0.483497
ENSMUSG00000073888	Ccl27a	0.000490311	0.000245309	0.0876398	0.00339263	0.127	0.0676667	1	0
ENSMUSG00000004626	Stxbp2	0.000501919	0.000823703	0.0956454	0.0171229	0.106	0.0453333	0.677584	0.558441
ENSMUSG00000102869	Norad	0.000507637	0.000797598	0.107489	0.0125624	0.217	0.133	0.987873	0.0210039
ENSMUSG00000032657	Fam189b	0.000515834	0.000549938	0.11919	0.0161685	0.179	0.103333	0.723419	0.479052
ENSMUSG00000009647	Mcu	0.000521513	0.000559359	-0.184619	0.0270698	0.429	0.515667	1	0
ENSMUSG00000026281	Dtymk	0.000526376	0.000898198	0.108414	0.0270786	0.182	0.0986667	0.482687	0.492769
ENSMUSG00000060988	Galnt13	0.000526928	0.000326535	-0.11053	0.00681507	0.99	0.988667	1	0	SFARI					2	0
ENSMUSG00000024736	Tmem132a	0.000528579	0.000668831	0.11042	0.0160978	0.235	0.149667	0.955527	0.0770303
ENSMUSG00000024462	Gabbr1	0.000533996	7.3454e-05	0.167389	0.00742196	0.606	0.513333	1	0
ENSMUSG00000025422	Agap2	0.000555989	0.000960918	0.158372	0.0324224	0.364	0.25	0.356306	0.557459	SFARI					2	0
ENSMUSG00000022194	Pabpn1	0.000563283	0.00088207	0.170353	0.0339948	0.55	0.442	0.716893	0.490356
ENSMUSG00000024335	Brd2	0.000578941	0.000559265	0.145279	0.030719	0.247	0.160667	0.672851	0.566639
ENSMUSG00000045441	Gprin3	0.000596842	0.000154329	-0.227556	0.00366733	0.674	0.725333	1	0
ENSMUSG00000034156	Tspoap1	0.000612981	0.000918832	0.17546	0.0227162	0.522	0.426333	0.797671	0.350445	SFARI					2	0
ENSMUSG00000015968	Cacna1d	0.000618716	0.000932339	0.168472	0.0260079	0.849	0.783667	0.818289	0.314732	SFARI					2	0
ENSMUSG00000002625	Akap8l	0.000631823	0.000870328	0.176382	0.0261697	0.685	0.613667	0.998736	0.00218921
ENSMUSG00000024500	Ppp2r2b	0.000632895	0.000420855	-0.163496	0.00695963	0.841	0.859667	1	0
ENSMUSG00000023826	Prkn	0.000633548	0.000225035	-0.16272	0.00632613	0.81	0.834667	1	0	SFARI					2	0
ENSMUSG00000055932	Fto	0.000640028	0.000619253	-0.134056	0.0164306	0.5	0.6	1	0
ENSMUSG00000029712	Actl6b	0.00064446	0.000426353	0.130518	0.00295184	0.276	0.192667	1	0	SFARI						1
ENSMUSG00000059974	Ntm	0.000646233	0.00079723	-0.191377	0.0198942	0.916	0.938	1	0
ENSMUSG00000078784	Rbis	0.000661273	0.00038088	0.0760087	0.00262344	0.101	0.049	1	0
ENSMUSG00000052387	Trpm3	0.000691126	0.000807709	0.29676	0.0441112	0.551	0.456	1	0
ENSMUSG00000020923	Ubtf	0.000692866	0.00117569	0.158183	0.0207298	0.28	0.187667	0.602389	0.350728
ENSMUSG00000070000	Fcho1	0.000693297	0.000677196	0.116078	0.00928595	0.222	0.144333	1	0
ENSMUSG00000015501	Hivep2	0.000706187	0.00057944	-0.165176	0.013843	0.965	0.965667	1	0	SFARI					1	1
ENSMUSG00000026207	Speg	0.000711402	0.00106231	0.147832	0.0138634	0.407	0.306667	1	0
ENSMUSG00000040860	Crocc	0.000712781	0.000813629	0.116667	0.0297163	0.373	0.267667	0.78944	0.364701
ENSMUSG00000020121	Srgap1	0.00071339	0.000624315	-0.199539	0.0311887	0.712	0.759333	1	0
ENSMUSG00000041841	Rpl37	0.000717835	0.000573559	0.112381	0.0073712	0.18	0.109	1	0
ENSMUSG00000017210	Med24	0.000728118	0.000593718	0.0975729	0.00802851	0.187	0.116	1	0
ENSMUSG00000029056	Pank4	0.000758227	0.0011189	0.0836166	0.00985396	0.111	0.054	1	0
ENSMUSG00000042807	Hecw2	0.000762819	0.00065335	-0.158327	0.0236139	0.836	0.890667	0.808416	0.331834	SFARI					2	0
ENSMUSG00000024955	Esrra	0.000774039	0.000666044	0.101146	0.0118808	0.162	0.096	1	0
ENSMUSG00000098274	Rpl24	0.000779438	0.000513362	0.079233	0.00721433	0.116	0.06	1	0
ENSMUSG00000022748	Cmss1	0.000788206	0.000184993	0.165163	0.00702674	0.821	0.767333	1	0
ENSMUSG00000057897	Camk2b	0.000817541	0.000681634	0.172679	0.0203732	0.841	0.805667	1	0	SFARI						1
ENSMUSG00000097736	9530059O14Rik	0.00082759	0.000267718	-0.17525	0.00906142	0.851	0.864	1	0
ENSMUSG00000027646	Src	0.000829442	0.00126378	0.0784685	0.0113846	0.113	0.054	0.870345	0.224569
ENSMUSG00000031153	Gripap1	0.000844039	0.000599455	0.148372	0.0145412	0.536	0.444667	1	0
ENSMUSG00000059796	Eif4a1	0.000861861	0.000912914	0.147243	0.0116127	0.285	0.203667	1	0
ENSMUSG00000045671	Spred2	0.000891578	0.00103408	-0.184379	0.0242761	0.492	0.560333	1	0
ENSMUSG00000031708	Tecr	0.000910567	0.000617122	0.15877	0.0125022	0.368	0.282667	1	0
ENSMUSG00000032939	Nup93	0.000913462	0.00111904	-0.184004	0.0235922	0.543	0.607667	1	0
ENSMUSG00000046364	Rpl27a	0.000948748	0.0010145	0.0829869	0.0121575	0.132	0.0723333	1	0
ENSMUSG00000022433	Csnk1e	0.000950517	0.000687166	0.0816117	0.00845086	0.124	0.067	1	0	SFARI					2	0
ENSMUSG00000012405	Rpl15	0.000960265	0.000600926	0.0837134	0.0034357	0.116	0.062	1	0
ENSMUSG00000032238	Rora	0.000979257	0.00147901	-0.134818	0.027517	0.997	0.997667	0.734736	0.459451	SFARI						1
ENSMUSG00000032301	Psma4	0.000985925	0.000419665	0.081846	0.00465699	0.118	0.063	1	0
ENSMUSG00000032294	Pkm	0.000987573	0.000702655	0.144026	0.0174595	0.334	0.249333	1	0
ENSMUSG00000030161	Gabarapl1	0.00100549	0.000248007	0.118435	0.00404684	0.233	0.159	1	0
ENSMUSG00000030120	Mlf2	0.00104701	0.00178734	0.134952	0.0301604	0.27	0.177667	0.621586	0.34511
ENSMUSG00000020173	Cobl	0.00106966	0.00109994	-0.174403	0.0141439	0.591	0.669	1	0
ENSMUSG00000079523	Tmsb10	0.00107682	0.00166018	0.101483	0.010236	0.131	0.07	1	0
ENSMUSG00000052837	Junb	0.00111217	0.000916912	0.191652	0.0210118	0.276	0.194667	1	0
ENSMUSG00000035206	Sppl2b	0.00112102	0.000857823	0.0960052	0.00381792	0.139	0.0803333	1	0
ENSMUSG00000066406	Akap13	0.00114402	0.00107112	0.0890282	0.0100064	0.142	0.0816667	1	0
ENSMUSG00000071528	Atp5md	0.0011583	0.00158194	0.114364	0.0116824	0.224	0.146667	1	0
ENSMUSG00000039145	Camk1d	0.00120514	0.0017311	0.149085	0.0240589	0.947	0.929667	1	0
ENSMUSG00000102252	Snrpn	0.00121319	0.000931392	0.156719	0.0146033	0.593	0.522	1	0
ENSMUSG00000034488	Edil3	0.00126869	0.00044083	-0.30288	0.0484142	0.184	0.247667	1	0
ENSMUSG00000036817	Sun1	0.00127917	0.000730429	0.115635	0.00689606	0.298	0.219	1	0
ENSMUSG00000026082	Rev1	0.00131123	0.000755329	0.176954	0.0137967	0.616	0.557333	1	0
ENSMUSG00000059213	Ddn	0.00131172	0.00172305	0.078611	0.0151004	0.113	0.0553333	0.727589	0.471829
ENSMUSG00000074884	Serf2	0.00131529	0.000833048	0.0843301	0.00772439	0.124	0.069	1	0
ENSMUSG00000000088	Cox5a	0.00131905	0.0011297	0.177196	0.0177911	0.285	0.210333	1	0
ENSMUSG00000001119	Col6a1	0.00134462	0.00190897	0.133763	0.0205004	0.214	0.137333	0.910837	0.154435
ENSMUSG00000073102	Drc1	0.00134939	0.00154286	0.0789949	0.0137487	0.111	0.0556667	0.952404	0.0824383
ENSMUSG00000004936	Map2k1	0.00135518	0.0019716	0.136397	0.0218586	0.326	0.238	1	0
ENSMUSG00000014313	Cox6c	0.00136084	0.00231548	0.166558	0.0315375	0.298	0.207333	0.748562	0.435503
ENSMUSG00000037742	Eef1a1	0.00138107	0.00181651	0.15932	0.0422128	0.407	0.312667	0.761305	0.413431
ENSMUSG00000056367	Actr3b	0.001438	0.00133165	0.139962	0.023972	0.533	0.438	1	0
ENSMUSG00000003273	Car11	0.00153663	0.00132796	0.151115	0.0411502	0.503	0.413667	0.762955	0.410573
ENSMUSG00000022577	Ly6h	0.00153977	0.00252545	0.16754	0.0388123	0.364	0.267333	0.683804	0.547668
ENSMUSG00000058301	Upf1	0.00156023	0.00142674	0.0955301	0.00567467	0.169	0.105333	1	0
ENSMUSG00000042350	Arel1	0.00156889	0.00229411	0.159851	0.013693	0.545	0.451667	1	0
ENSMUSG00000028137	Celf3	0.0016184	0.00179019	0.0965952	0.0149985	0.356	0.264667	1	0
ENSMUSG00000042694	Stn1	0.00162354	0.00277675	0.111433	0.0176197	0.134	0.069	0.722838	0.371486
ENSMUSG00000006676	Usp19	0.00162963	0.00271057	0.137055	0.0243691	0.295	0.204667	0.820442	0.311004
ENSMUSG00000047547	Cltb	0.00165954	0.00171408	0.0919577	0.00617453	0.172	0.108	1	0
ENSMUSG00000035189	Ano4	0.00168349	0.0028314	-0.117356	0.0365963	0.094	0.165	1	0
ENSMUSG00000008348	Ubc	0.00168715	0.0027681	0.123666	0.0308224	0.28	0.191333	1	0
ENSMUSG00000058317	Ube2e2	0.00169671	0.000108371	-0.152713	0.0217724	0.724	0.761667	1	0
ENSMUSG00000028351	Brinp1	0.00170467	0.00193879	-0.185754	0.0247491	0.798	0.828	1	0
ENSMUSG00000053617	Sh3pxd2a	0.00173952	0.00161794	0.110554	0.010851	0.263	0.184667	1	0
ENSMUSG00000031605	Klhl2	0.00181265	0.0021233	-0.181287	0.0187657	0.629	0.681	1	0
ENSMUSG00000038437	Mllt6	0.00181951	0.00104821	0.126362	0.00498329	0.253	0.182667	1	0
ENSMUSG00000055302	Mrfap1	0.00183839	0.00258925	0.0969288	0.0112469	0.141	0.081	1	0
ENSMUSG00000048264	Dip2c	0.00184781	0.00298693	-0.158299	0.0292662	0.935	0.945333	1	0	SFARI					2	0
ENSMUSG00000042675	Ypel3	0.00188054	0.00253588	0.0973336	0.014958	0.189	0.118667	1	0
ENSMUSG00000059824	Dbp	0.00188369	0.00197996	0.122943	0.0101405	0.321	0.24	1	0
ENSMUSG00000048756	Foxo3	0.0018977	0.00170056	0.121436	0.0320125	0.348	0.255333	0.892514	0.186171
ENSMUSG00000067925	Rtl8a	0.0019012	0.00130892	0.0964985	0.00375481	0.152	0.094	1	0
ENSMUSG00000016427	Ndufa1	0.00191031	0.00292773	0.118344	0.0113504	0.136	0.0776667	1	0
ENSMUSG00000028059	Arhgef2	0.0019375	0.00189228	0.140792	0.0151589	0.455	0.366667	1	0	SFARI					3	0
ENSMUSG00000028782	Adgrb2	0.00193973	0.00255223	0.131017	0.0307367	0.298	0.210333	0.721495	0.482385
ENSMUSG00000031840	Rab3a	0.00195384	0.00124503	0.102468	0.00955004	0.197	0.13	1	0
ENSMUSG00000033065	Pfkm	0.00197687	0.00155189	0.0967174	0.00419511	0.228	0.155333	1	0
ENSMUSG00000031310	Zmym3	0.00198515	0.0023867	0.149494	0.0224856	0.31	0.227667	1	0
ENSMUSG00000026825	Dnm1	0.00201902	0.00208336	0.120136	0.00196448	0.394	0.306333	1	0
ENSMUSG00000085181	Gm12709	0.00203683	0.00236283	0.0897462	0.00923748	0.123	0.0686667	1	0
ENSMUSG00000013033	Adgrl1	0.0020449	0.00216147	0.167239	0.0121058	0.478	0.411667	1	0	SFARI						1
ENSMUSG00000037843	Vstm2l	0.00206654	0.00280858	0.0966662	0.011475	0.154	0.0926667	1	0
ENSMUSG00000025221	Kcnip2	0.00208407	0.0022161	0.167628	0.0338238	0.601	0.529667	1	0
ENSMUSG00000018537	Pcgf2	0.00212791	0.00329291	0.0885859	0.0208762	0.147	0.0843333	1	0
ENSMUSG00000036882	Arhgap33	0.00217641	0.00153777	0.122808	0.0149566	0.321	0.244	1	0
ENSMUSG00000072964	Bhlhb9	0.00218125	0.00322642	0.134497	0.0291007	0.371	0.281667	1	0
ENSMUSG00000044533	Rps2	0.00222456	0.000516641	0.0903228	0.00416024	0.242	0.168667	1	0
ENSMUSG00000035521	Gnptg	0.00222495	0.00193567	0.114463	0.0186165	0.363	0.28	1	0
ENSMUSG00000037679	Inf2	0.00222577	0.00222076	0.166944	0.0116891	0.558	0.492667	1	0
ENSMUSG00000030678	Maz	0.00222902	0.00178147	0.0894976	0.0107779	0.144	0.0866667	1	0
ENSMUSG00000024121	Atp6v0c	0.00223513	0.00250688	0.166577	0.0318252	0.469	0.389333	1	0
ENSMUSG00000044700	Tmem201	0.00223927	0.000893163	0.10158	0.00764868	0.146	0.09	1	0
ENSMUSG00000029406	Pitpnm2	0.00231266	0.00364237	0.135937	0.0230243	0.474	0.378667	1	0
ENSMUSG00000028969	Cdk5	0.00231394	0.000218286	0.0664665	0.00662645	0.139	0.083	1	0
ENSMUSG00000017119	Nbr1	0.0023798	0.0011312	0.127731	0.0129503	0.315	0.240667	1	0
ENSMUSG00000032855	Pkd1	0.00239932	0.00342507	0.12743	0.0225526	0.543	0.442333	1	0
ENSMUSG00000047843	Bri3	0.00242567	0.00249106	0.0938379	0.0132159	0.131	0.0763333	1	0
ENSMUSG00000020464	Pnpt1	0.00244013	0.00338185	0.140921	0.0159676	0.263	0.189333	1	0
ENSMUSG00000038886	Man2a2	0.00244889	0.00155171	0.146783	0.00815314	0.387	0.319333	1	0
ENSMUSG00000026202	Tuba4a	0.00245378	0.00180797	0.108316	0.0113545	0.212	0.144	1	0
ENSMUSG00000033526	Ppip5k1	0.00246321	0.00273384	0.156121	0.0196051	0.389	0.312	1	0
ENSMUSG00000047714	Ppp1r2	0.0025154	0.0038944	0.227834	0.0646492	0.629	0.545667	0.667236	0.576364
ENSMUSG00000028467	Gba2	0.00253278	0.00336905	0.130125	0.0216963	0.288	0.211333	1	0
ENSMUSG00000026384	Ptpn4	0.00254939	0.00317793	-0.15786	0.017629	0.45	0.530667	1	0	SFARI						1
ENSMUSG00000021548	Ccnh	0.00257294	0.00088551	0.121589	0.0164787	0.349	0.270333	1	0
ENSMUSG00000024948	Map4k2	0.00260431	0.00363052	0.0939189	0.0132503	0.151	0.0903333	1	0
ENSMUSG00000032594	Ip6k1	0.00264226	0.0022472	0.101755	0.0161272	0.237	0.163	1	0
ENSMUSG00000040936	Ulk4	0.00265075	0.0036757	0.168808	0.0182427	0.482	0.409333	1	0
ENSMUSG00000026657	Frmd4a	0.00268067	0.00342693	-0.168308	0.0197613	0.674	0.734667	1	0
ENSMUSG00000022269	Marchf11	0.00270668	0.00285513	-0.145942	0.0246358	0.2	0.279333	0.968057	0.0553276
ENSMUSG00000031065	Cdk16	0.00271141	0.00145365	0.0824654	0.00377181	0.144	0.088	1	0
ENSMUSG00000045038	Prkce	0.00275889	0.00250176	-0.126431	0.0135166	0.902	0.904667	1	0
ENSMUSG00000056076	Eif3b	0.00279069	0.00139974	0.0798715	0.00221953	0.121	0.0703333	1	0
ENSMUSG00000017421	Zfp207	0.00280612	0.00366836	0.131063	0.0324412	0.671	0.578667	1	0
ENSMUSG00000031112	Stk26	0.00282721	0.00291235	0.121666	0.00780403	0.348	0.267667	1	0
ENSMUSG00000032020	Ubash3b	0.00286361	0.00165314	-0.0976135	0.00390594	0.126	0.188667	1	0
ENSMUSG00000023191	P3h3	0.00288407	0.00246867	0.0961231	0.0204315	0.136	0.0776667	1	0
ENSMUSG00000004207	Psap	0.0029111	0.0028757	0.111048	0.0186691	0.377	0.290333	1	0
ENSMUSG00000033128	Gga1	0.00292877	0.00472754	0.0821533	0.0158929	0.136	0.0763333	1	0
ENSMUSG00000034951	Cog7	0.00293837	0.00320696	0.0884201	0.00768159	0.141	0.0843333	1	0
ENSMUSG00000049583	Grm5	0.00299348	0.00290631	0.0732492	0.00950651	1	1	1	0	SFARI					2	0
ENSMUSG00000030209	Grin2b	0.00306939	0.00473103	0.0978643	0.0184238	1	0.999333	1	0	SFARI;EAGLE;TADA	2.49e-09	Definitive	29.65	Concordant	1	0
ENSMUSG00000051177	Plcb1	0.0030893	0.00394944	-0.10346	0.019754	0.997	0.997333	1	0	SFARI					2	0
ENSMUSG00000034187	Nsf	0.0031065	0.00421766	0.151662	0.0141504	0.742	0.678333	1	0
ENSMUSG00000040389	Wdr47	0.0031234	0.0022433	0.100568	0.0104723	0.401	0.316	1	0
ENSMUSG00000022131	Gpr180	0.00314366	0.00503976	0.108909	0.0182427	0.174	0.107667	1	0
ENSMUSG00000041354	Rgl2	0.00316986	0.00307426	0.0668506	0.0065023	0.104	0.057	1	0
ENSMUSG00000002028	Kmt2a	0.00318196	0.00255199	0.164287	0.0229461	0.732	0.661667	1	0	SFARI;EAGLE;TADA	0.00142415	Definitive	18.55	Concordant	1	1
ENSMUSG00000041112	Elmo1	0.00318938	0.00376771	-0.141699	0.0427843	0.815	0.879667	1	0
ENSMUSG00000022199	Slc22a17	0.00333732	0.0057319	0.15961	0.0403191	0.598	0.485	0.821404	0.309338
ENSMUSG00000049422	Chchd10	0.00334222	0.00218352	0.142381	0.0145552	0.285	0.214667	1	0
ENSMUSG00000038181	Chpf2	0.0033558	0.00502383	0.125334	0.0247787	0.222	0.151667	1	0
ENSMUSG00000033342	Plppr5	0.00336143	0.0055741	-0.182934	0.0344917	0.402	0.480667	1	0
ENSMUSG00000115718	Gm49179	0.00348548	0.00504997	0.0694547	0.0110562	0.103	0.0536667	1	0
ENSMUSG00000024045	Akap8	0.00351275	0.00423689	0.136786	0.0181284	0.313	0.238667	1	0
ENSMUSG00000036748	Cuedc2	0.003541	0.0013291	0.0685765	0.00342502	0.111	0.0636667	1	0
ENSMUSG00000058589	Anks1b	0.00355481	0.00252286	-0.0980851	0.01545	1	1	1	0	SFARI					2	1
ENSMUSG00000031007	Atp6ap2	0.00358975	0.00379666	0.106588	0.00503273	0.235	0.166667	1	0
ENSMUSG00000030894	Tpp1	0.003633	0.00493109	0.0994286	0.012621	0.161	0.100333	1	0
ENSMUSG00000024393	Prrc2a	0.00366417	0.00494114	0.0970526	0.0139786	0.194	0.129	1	0
ENSMUSG00000054162	Spock3	0.00367989	0.00566537	-0.115928	0.0230096	0.995	0.992	1	0
ENSMUSG00000064293	Cntn4	0.00368121	0.00430889	-0.145408	0.026082	0.97	0.977333	1	0	SFARI					2	0
ENSMUSG00000022012	Enox1	0.0036936	0.00256535	-0.130418	0.00906926	0.889	0.902667	1	0
ENSMUSG00000093528	Nrg3os	0.00373106	0.0023568	-0.093762	0.010446	0.083	0.134667	1	0
ENSMUSG00000030007	Cct7	0.00373303	0.0056341	0.0845283	0.0142703	0.167	0.104333	1	0
ENSMUSG00000003299	Mrpl4	0.00374059	0.000574871	0.063547	0.00224021	0.109	0.0623333	1	0
ENSMUSG00000061904	Slc25a3	0.00384611	0.00315246	0.159256	0.0245331	0.614	0.540333	1	0
ENSMUSG00000024560	Cxxc1	0.00389257	0.0043962	0.0850726	0.0125787	0.132	0.0786667	1	0
ENSMUSG00000029657	Hsph1	0.00390174	0.00514622	0.103763	0.0155065	0.315	0.234333	1	0
ENSMUSG00000041014	Nrg3	0.00391714	0.00560987	-0.174251	0.0476437	0.588	0.68	1	0
ENSMUSG00000021413	Prpf4b	0.00396364	0.00344433	0.145365	0.0218994	0.727	0.656	1	0
ENSMUSG00000040452	Cdh12	0.00407784	0.00493615	-0.135294	0.0378528	0.358	0.443667	1	0
ENSMUSG00000009394	Syn2	0.00409922	0.00353322	0.124447	0.0254712	0.752	0.672667	1	0	SFARI					2	0
ENSMUSG00000030760	Acer3	0.00411134	0.00292392	0.0610207	0.0144114	0.175	0.113	1	0
ENSMUSG00000044349	Snhg11	0.00411626	0.00651591	0.123336	0.0208731	0.983	0.987667	1	0
ENSMUSG00000062078	Qk	0.00414673	0.00391367	-0.316286	0.0401056	0.442	0.497667	1	0
ENSMUSG00000006728	Cdk4	0.00416136	0.00329655	0.0783354	0.0103895	0.136	0.0816667	1	0
ENSMUSG00000090266	Mettl23	0.00419405	0.00371627	0.0872899	0.0297954	0.167	0.102333	0.750772	0.431676
ENSMUSG00000054008	Ndst1	0.00419563	0.00422798	0.0760775	0.00867798	0.147	0.0916667	1	0
ENSMUSG00000101609	Kcnq1ot1	0.00421202	0.00416728	-0.150814	0.00689968	0.424	0.496333	1	0
ENSMUSG00000029199	Lias	0.00426846	0.00318512	0.0873762	0.0130728	0.162	0.105	1	0
ENSMUSG00000098243	Gm4258	0.00431988	0.0069638	-0.181166	0.0457118	0.238	0.312667	1	0
ENSMUSG00000023571	C1qtnf12	0.00452611	0.00198866	0.0822265	0.00246432	0.156	0.100667	1	0
ENSMUSG00000003363	Pld3	0.00454094	0.00191777	0.121224	0.00856614	0.404	0.326667	1	0
ENSMUSG00000045994	B3gat1	0.00454694	0.00676983	0.130256	0.0255394	0.253	0.179333	1	0
ENSMUSG00000021700	Rab3c	0.00455434	0.00685013	-0.173529	0.0553488	0.457	0.536667	1	0
ENSMUSG00000032625	Thsd7a	0.00459122	0.0057694	-0.21263	0.0198213	0.853	0.867667	1	0
ENSMUSG00000031750	Il34	0.00463935	0.00632652	0.0975449	0.0110786	0.156	0.0976667	1	0
ENSMUSG00000037907	Ankrd13b	0.00465058	0.00324215	0.0981783	0.0083158	0.209	0.146333	1	0
ENSMUSG00000061601	Pclo	0.00467125	0.0030748	0.135322	0.00517108	0.861	0.851333	1	0
ENSMUSG00000024012	Mtch1	0.00472013	0.00586877	0.131625	0.0406776	0.298	0.218667	0.731594	0.464892
ENSMUSG00000002496	Tsc2	0.00472049	0.0040304	0.0747849	0.0131228	0.114	0.0636667	1	0	SFARI					1	1
ENSMUSG00000028898	Trnau1ap	0.004721	0.00495924	0.0691642	0.0108271	0.131	0.0776667	1	0
ENSMUSG00000097277	2900076A07Rik	0.00474094	0.00269533	0.0655998	0.00702502	0.134	0.082	1	0
ENSMUSG00000031565	Fgfr1	0.00475777	0.00655865	0.103004	0.01309	0.113	0.0633333	1	0	SFARI					2	0
ENSMUSG00000032402	Smad3	0.00486439	0.00260967	0.0869485	0.0122505	0.295	0.219333	1	0
ENSMUSG00000022340	Sybu	0.00486955	0.00474843	-0.178507	0.0339459	0.561	0.627	1	0	SFARI					3	0
ENSMUSG00000034570	Inpp5j	0.00488859	0.00510474	0.0634393	0.00776592	0.124	0.0733333	1	0
ENSMUSG00000001525	Tubb5	0.00491839	0.0052102	0.0997342	0.016103	0.187	0.126333	1	0
ENSMUSG00000068749	Psma5	0.00496117	0.00149839	0.0733445	0.00584857	0.121	0.073	1	0
ENSMUSG00000020850	Prpf8	0.00501539	0.00737011	0.106938	0.0175726	0.215	0.148	1	0	SFARI					3	0
ENSMUSG00000042524	Sun2	0.00502069	0.00646232	0.0829689	0.0118701	0.164	0.105333	1	0
ENSMUSG00000022840	Adcy5	0.00508839	0.00551493	0.121753	0.0376998	0.954	0.934667	1	0	SFARI					2	0
ENSMUSG00000039615	Stub1	0.00509551	0.00163778	0.062905	0.00944779	0.177	0.117667	1	0
ENSMUSG00000056770	Setd3	0.00527547	0.00316454	-0.122769	0.00900485	0.318	0.388667	1	0
ENSMUSG00000019087	Atp6ap1	0.00531712	0.00808674	0.0945374	0.0171076	0.19	0.126667	1	0
ENSMUSG00000052479	A330008L17Rik	0.00542987	0.00290764	-0.165506	0.0114153	0.252	0.318333	1	0
ENSMUSG00000027016	Zfp385b	0.0055061	0.00553338	-0.153402	0.0173384	0.937	0.972667	1	0	SFARI					2	0
ENSMUSG00000023952	Gtpbp2	0.00551609	0.0061016	0.0941595	0.0158763	0.24	0.172	1	0
ENSMUSG00000022564	Grina	0.00552973	0.00954132	0.156271	0.03202	0.419	0.323	0.735511	0.430081
ENSMUSG00000024082	Ndufaf7	0.00556913	0.00243706	0.106762	0.0102633	0.305	0.236	1	0
ENSMUSG00000030327	Necap1	0.00556976	0.00314242	0.0865677	0.00217601	0.142	0.091	1	0
ENSMUSG00000113902	Ndufb1	0.00557869	0.00559081	0.102168	0.0162891	0.157	0.0996667	1	0
ENSMUSG00000038390	Gpr162	0.00558452	0.000615058	0.0692539	0.00331606	0.146	0.0936667	1	0
ENSMUSG00000033295	Ptprf	0.00559655	0.00464777	0.0681175	0.0125402	0.127	0.076	1	0
ENSMUSG00000022602	Arc	0.00562335	0.00924532	0.142289	0.00879301	0.187	0.121	1	0
ENSMUSG00000031672	Got2	0.0057143	0.00944832	0.101652	0.0280104	0.207	0.135333	1	0
ENSMUSG00000052544	St6galnac3	0.00572481	0.00828845	-0.208193	0.0396664	0.316	0.389333	1	0
ENSMUSG00000027827	Kcnab1	0.0058451	0.00848888	-0.110807	0.0265995	0.988	0.984	1	0
ENSMUSG00000001924	Uba1	0.0058733	0.0092047	0.102773	0.0130135	0.194	0.128667	1	0
ENSMUSG00000041936	Agrn	0.0060154	0.00515835	0.11557	0.0248174	0.283	0.21	1	0
ENSMUSG00000098097	6530403H02Rik	0.00608958	0.00657473	-0.125866	0.0300697	0.51	0.594667	1	0
ENSMUSG00000017677	Wsb1	0.00616322	0.00858977	0.124728	0.0273642	0.257	0.186333	1	0
ENSMUSG00000035067	Xkr6	0.0061723	0.00642633	-0.147173	0.0114472	0.783	0.818333	1	0
ENSMUSG00000000605	Clcn4	0.00624066	0.00706694	0.100992	0.0176705	0.19	0.130333	1	0	SFARI					2	1
ENSMUSG00000031078	Cttn	0.00626995	0.0105544	0.0860351	0.02052	0.159	0.096	1	0
ENSMUSG00000019428	Fkbp8	0.0062753	0.00363589	0.0875047	0.00238665	0.2	0.141333	1	0
ENSMUSG00000028944	Prkag2	0.0062781	0.00543924	0.112679	0.0171341	0.412	0.331	1	0
ENSMUSG00000031376	Atp2b3	0.00633978	0.00702507	0.0937842	0.0189212	0.214	0.150333	1	0
ENSMUSG00000018363	Smurf2	0.00634026	0.00533267	0.145112	0.0121197	0.429	0.357667	1	0
ENSMUSG00000060073	Psma3	0.00634426	0.00818656	0.125052	0.0147069	0.449	0.374667	1	0
ENSMUSG00000003378	Grik5	0.00635063	0.00104872	0.148088	0.00224089	0.488	0.428667	1	0	SFARI					2	0
ENSMUSG00000039539	Sgcz	0.00640657	0.0075602	0.0810943	0.021544	0.997	0.998667	1	0
ENSMUSG00000041459	Tardbp	0.0064143	0.00459291	0.103607	0.00545708	0.392	0.317	1	0
ENSMUSG00000020074	Ccar1	0.00645782	0.0108547	0.149233	0.0283935	0.465	0.382667	1	0
ENSMUSG00000000355	Mcts1	0.006582	0.00650523	0.0876779	0.021288	0.295	0.22	1	0
ENSMUSG00000037771	Slc32a1	0.00660063	0.0067813	0.122472	0.00669929	0.268	0.202667	1	0
ENSMUSG00000029176	Anapc4	0.00664784	0.00360529	0.0739656	0.0114733	0.242	0.174333	1	0
ENSMUSG00000037805	Rpl10a	0.00676735	0.00942728	0.0853377	0.00932776	0.161	0.103	1	0
ENSMUSG00000118401	Gpr52	0.0067814	0.00395987	-0.101622	0.0089863	0.126	0.180333	1	0
ENSMUSG00000016346	Kcnq2	0.00679941	0.00840401	0.113264	0.0280682	0.459	0.372667	1	0	SFARI					2	0
ENSMUSG00000075376	Rc3h2	0.00682059	0.00913432	0.121612	0.0353929	0.53	0.442667	1	0
ENSMUSG00000031060	Rbm10	0.00684388	0.00992871	0.126767	0.0161885	0.23	0.164333	1	0
ENSMUSG00000007892	Rplp1	0.0069022	0.00405808	0.143716	0.00719555	0.325	0.258333	1	0
ENSMUSG00000036636	Clcn7	0.00691172	0.00986449	0.0692564	0.0110809	0.124	0.073	1	0
ENSMUSG00000022174	Dad1	0.00692033	0.00729137	0.0916474	0.0129202	0.169	0.112667	1	0
ENSMUSG00000006932	Ctnnb1	0.00695226	0.00639854	0.102259	0.0185127	0.245	0.178	1	0	SFARI;EAGLE;TADA	5.54e-05	Definitive	32.75	Concordant	1	0
ENSMUSG00000022961	Son	0.00695851	0.00471793	0.123433	0.00732719	0.881	0.835667	1	0	SFARI;EAGLE		Moderate	11	Discordant	1	1
ENSMUSG00000051401	Kctd16	0.00697216	0.00928096	-0.111568	0.014257	0.987	0.985	1	0
ENSMUSG00000030584	Dpf1	0.00699118	0.00818274	0.0811448	0.0177947	0.192	0.128	1	0
ENSMUSG00000018476	Kdm6b	0.00699715	0.00581208	0.0805678	0.0162462	0.123	0.0743333	1	0	SFARI;EAGLE;TADA	0.00038344	Definitive	13.75	Concordant	1	0
ENSMUSG00000059003	Grin2a	0.00702255	0.00371008	-0.121078	0.00472922	0.896	0.909	1	0	SFARI;EAGLE		Limited	3.6	Discordant	1	0
ENSMUSG00000024515	Smad4	0.00712498	0.00845429	-0.137664	0.0343942	0.44	0.512667	1	0	SFARI					2	0
ENSMUSG00000021501	Caml	0.00714527	0.00834413	0.0846825	0.01157	0.2	0.135	1	0
ENSMUSG00000035131	Brinp3	0.00721304	0.0110658	0.246052	0.0647505	0.55	0.477333	1	0	SFARI					3	0
ENSMUSG00000034157	Cipc	0.0072496	0.00556411	-0.103511	0.0214783	0.31	0.387667	1	0
ENSMUSG00000024589	Nedd4l	0.00728122	0.0111779	-0.153264	0.0207478	0.901	0.906667	1	0
ENSMUSG00000037876	Jmjd1c	0.00728339	0.00601052	-0.143354	0.00471331	0.674	0.731	1	0	SFARI					2	0
ENSMUSG00000040867	Begain	0.00732841	0.00834423	0.0769237	0.0109335	0.144	0.092	1	0
ENSMUSG00000000823	Zfp512b	0.00733084	0.00945244	0.0856426	0.0183915	0.161	0.103	1	0
ENSMUSG00000020333	Acsl6	0.00741118	0.00921556	0.0919258	0.0110176	0.224	0.159667	1	0
ENSMUSG00000004897	Hdgf	0.00742202	0.00197534	0.102551	0.003292	0.152	0.102667	1	0
ENSMUSG00000022076	Klhl1	0.00750553	0.0126516	-0.235088	0.091472	0.402	0.491333	0.684132	0.5471
ENSMUSG00000022841	Ap2m1	0.00750863	0.00352824	0.0693751	0.00246068	0.161	0.107	1	0
ENSMUSG00000034681	Rnps1	0.00754119	0.00966542	0.0978319	0.016441	0.21	0.146667	1	0
ENSMUSG00000060636	Rpl35a	0.00756242	0.00970054	0.110846	0.0152024	0.161	0.106	1	0
ENSMUSG00000055839	Elob	0.00759845	0.011696	0.0892495	0.0228293	0.192	0.129	1	0
ENSMUSG00000058624	Gda	0.0076398	0.00902474	0.0926084	0.0261783	0.429	0.343333	1	0	SFARI					2	0
ENSMUSG00000073422	H2-Ke6	0.00768557	0.0115051	0.0729181	0.0181452	0.111	0.0606667	1	0
ENSMUSG00000013089	Etv5	0.0077007	0.00362925	-0.106448	0.00898764	0.199	0.262333	1	0
ENSMUSG00000019179	Mdh2	0.0077265	0.00333183	0.118124	0.00429716	0.197	0.141	1	0
ENSMUSG00000022186	Oxct1	0.00781375	0.00172247	-0.133653	0.0125802	0.52	0.579667	1	0
ENSMUSG00000006941	Eif1b	0.00781514	0.00709219	0.0675099	0.00936714	0.101	0.0586667	1	0
ENSMUSG00000026888	Grb14	0.00783965	0.00409089	-0.0805043	0.0171509	0.096	0.147	1	0
ENSMUSG00000084849	Gm16105	0.00785906	0.00704916	0.093073	0.0202081	0.184	0.124667	1	0
ENSMUSG00000096929	A330023F24Rik	0.00788816	0.00935573	0.140991	0.0236043	0.753	0.693667	1	0
ENSMUSG00000034799	Unc13a	0.00790049	0.00459908	0.129896	0.0137754	0.45	0.378667	1	0	SFARI					2	1
ENSMUSG00000037235	Mxd4	0.0080556	0.00944471	0.0799088	0.00831767	0.129	0.08	1	0
ENSMUSG00000034472	Rasd2	0.00807376	0.00801975	0.110226	0.00558723	0.313	0.244667	1	0
ENSMUSG00000039913	Pak5	0.00810243	0.010295	-0.151695	0.0529186	0.278	0.352333	1	0
ENSMUSG00000002010	Idh3g	0.00810785	0.00476336	0.0791672	0.00683173	0.166	0.112333	1	0
ENSMUSG00000025402	Nab2	0.00820369	0.0128036	0.0879249	0.0176757	0.129	0.0766667	1	0
ENSMUSG00000018428	Akap1	0.00820676	0.0120969	0.0875466	0.0190263	0.157	0.101667	1	0
ENSMUSG00000028525	Pde4b	0.00821654	0.0122756	-0.169479	0.0570454	0.97	0.963667	1	0
ENSMUSG00000038384	Setd1b	0.00821905	0.0118288	0.0847305	0.017645	0.134	0.0796667	1	0	SFARI					2	1
ENSMUSG00000034994	Eef2	0.00821939	0.0110355	0.0672261	0.0141248	0.147	0.0933333	1	0
ENSMUSG00000022237	Ankrd33b	0.00823615	0.00521418	0.0972269	0.00971137	0.437	0.361	1	0
ENSMUSG00000034687	Fras1	0.00824436	0.00738405	-0.152224	0.0338226	0.712	0.743667	1	0
ENSMUSG00000059119	Nap1l4	0.00829644	0.00168557	0.0709079	0.00449661	0.151	0.100333	1	0
ENSMUSG00000004032	Gstm5	0.0083237	0.00695232	0.0623421	0.00467707	0.103	0.0603333	1	0
ENSMUSG00000022800	Fyttd1	0.00840963	0.00486715	0.0904396	0.0185984	0.336	0.261667	1	0
ENSMUSG00000057378	Ryr3	0.00845425	0.00725654	-0.0982693	0.0114831	1	0.998333	1	0
ENSMUSG00000022452	Smdt1	0.00871542	0.00491911	0.0674016	0.0100811	0.134	0.086	1	0
ENSMUSG00000031700	Gpt2	0.00887927	0.0103395	0.0811674	0.0143838	0.129	0.0796667	1	0
ENSMUSG00000070695	Cntnap5a	0.00891218	0.00896526	0.162547	0.0175086	0.717	0.661	1	0
ENSMUSG00000020740	Gga3	0.00891634	0.00298784	0.0726344	0.00236631	0.199	0.141333	1	0
ENSMUSG00000024008	Cpne5	0.00892954	0.0139281	0.140585	0.0349589	0.594	0.519667	1	0
ENSMUSG00000053094	Tmem248	0.00912033	0.00128371	0.0624205	0.00128441	0.114	0.0706667	1	0
ENSMUSG00000022770	Dlg1	0.00913805	0.00658848	-0.149919	0.00959175	0.864	0.872667	1	0	SFARI					2	0
ENSMUSG00000039103	Nexn	0.00914703	0.00291103	0.112051	0.00381175	0.31	0.245333	1	0
ENSMUSG00000038816	Ctnnal1	0.00929617	0.00651658	0.0743963	0.006762	0.171	0.116	1	0
ENSMUSG00000047786	Lix1	0.00931005	0.00572992	0.0691278	0.00382962	0.111	0.068	1	0
ENSMUSG00000085234	Gm15614	0.00934419	0.00451686	0.0937432	0.00250509	0.137	0.0906667	1	0
ENSMUSG00000061589	Dot1l	0.00938026	0.00743161	0.134936	0.0140972	0.411	0.337667	1	0
ENSMUSG00000053877	Srcap	0.00939393	0.00769347	0.0892757	0.0096132	0.255	0.191667	1	0	SFARI					1	0
ENSMUSG00000045257	Morn2	0.00942918	0.00986998	0.0750443	0.00558935	0.113	0.0686667	1	0
ENSMUSG00000062296	Trank1	0.00945366	0.00612131	0.132706	0.00931801	0.879	0.868667	1	0
ENSMUSG00000025413	Ttc4	0.00954461	0.00304827	0.0845141	0.00773297	0.21	0.153667	1	0
ENSMUSG00000066392	Nrxn3	0.00957656	0.0137838	-0.0789446	0.0143824	1	1	1	0	SFARI;EAGLE		Moderate	11.1	Discordant	1	0
ENSMUSG00000061603	Akap6	0.00959339	0.00711372	-0.109465	0.0189691	0.94	0.956	1	0
ENSMUSG00000084904	Gm14827	0.00970774	0.00323482	0.0806131	0.00339338	0.108	0.0663333	1	0
ENSMUSG00000001105	Ift20	0.00972853	0.0158216	0.0765268	0.0161454	0.113	0.0636667	1	0
ENSMUSG00000049553	Polr1a	0.00976061	0.00977699	0.0691103	0.00994983	0.175	0.118333	1	0
ENSMUSG00000017969	Ptgis	0.0098866	0.0156532	0.0818462	0.0309317	0.149	0.091	1	0
ENSMUSG00000030410	Dmwd	0.0101949	0.0121776	0.0787075	0.0143406	0.126	0.0783333	1	0	SFARI;TADA	0.00413177				2	0
ENSMUSG00000021699	Pde4d	0.0102271	0.00918712	0.178192	0.0322709	0.533	0.46	1	0
ENSMUSG00000023017	Asic1	0.0102808	0.00888685	0.0961186	0.027169	0.199	0.135667	1	0
ENSMUSG00000005779	Psmb4	0.0103655	0.00686259	0.0569351	0.0059146	0.106	0.0633333	1	0
ENSMUSG00000039059	Hrh3	0.010433	0.0160236	0.105742	0.0246248	0.172	0.112667	1	0
ENSMUSG00000028648	Ndufs5	0.0104983	0.00494282	0.0745919	0.00337187	0.123	0.0783333	1	0
ENSMUSG00000034686	Prr7	0.0105854	0.0113279	0.0717528	0.0130444	0.237	0.173333	1	0
ENSMUSG00000053332	Gas5	0.0106855	0.00659392	0.0849589	0.0085229	0.3	0.232667	1	0
ENSMUSG00000111068	Gm35501	0.0108888	0.00640139	-0.0735248	0.0117314	0.073	0.116	1	0
ENSMUSG00000020546	Stxbp4	0.0108919	0.00924278	0.0826107	0.0108967	0.139	0.0896667	1	0
ENSMUSG00000035596	Mboat7	0.0109805	0.0101763	0.0680762	0.00900485	0.114	0.07	1	0	SFARI;EAGLE		Limited	5.25	Discordant	1	1
ENSMUSG00000000563	Atp5pb	0.011007	0.0172188	0.135973	0.026059	0.339	0.264667	1	0
ENSMUSG00000022416	Cacna1i	0.0110969	0.00684485	0.0753357	0.00823316	0.29	0.221667	1	0	SFARI					2	0
ENSMUSG00000062202	Btbd9	0.0112158	0.00372517	0.0936541	0.00457481	0.359	0.287	1	0
ENSMUSG00000056692	Ilrun	0.0112301	0.0159106	-0.0761317	0.0156269	0.094	0.147	1	0
ENSMUSG00000039257	Vstm2b	0.0113197	0.0155842	0.0765979	0.0108538	0.126	0.0786667	1	0
ENSMUSG00000040952	Rps19	0.0113346	0.0122018	0.058005	0.0122845	0.141	0.091	1	0
ENSMUSG00000055026	Gabrg3	0.0113689	0.00761711	-0.117066	0.0183224	0.992	0.991	1	0	SFARI					2	0
ENSMUSG00000026158	Ogfrl1	0.0113745	0.00828257	0.0835261	0.0102797	0.18	0.127333	1	0
ENSMUSG00000057182	Scn3a	0.0114879	0.0130778	-0.135419	0.0247146	0.709	0.771667	1	0
ENSMUSG00000026740	Dnajc1	0.0116226	0.0139419	-0.153666	0.0164741	0.626	0.666	1	0
ENSMUSG00000037243	Zfp692	0.0116946	0.0174698	0.073859	0.026048	0.225	0.158333	1	0
ENSMUSG00000034928	Rnf44	0.0117017	0.0149233	0.0652667	0.0110734	0.101	0.059	1	0
ENSMUSG00000039474	Wfs1	0.0117239	0.00901388	0.0806302	0.00925829	0.104	0.0623333	1	0
ENSMUSG00000029471	Camkk2	0.0117426	0.00787762	0.1136	0.0171882	0.553	0.476333	1	0
ENSMUSG00000051331	Cacna1c	0.0117874	0.0117009	-0.104801	0.0146471	0.944	0.952333	1	0	SFARI					1	1
ENSMUSG00000036438	Calm2	0.011878	0.0106402	0.144764	0.0152872	0.755	0.706	1	0
ENSMUSG00000022992	Kansl2	0.0119158	0.0131684	0.0841643	0.0178727	0.185	0.128	1	0
ENSMUSG00000093383	Gm20642	0.0119173	0.0109212	-0.0903768	0.00889712	0.081	0.125667	1	0
ENSMUSG00000032586	Traip	0.0119822	0.00831568	0.144539	0.00670324	0.493	0.435333	1	0
ENSMUSG00000033161	Atp1a1	0.0120318	0.0198795	0.130924	0.0415194	0.382	0.305	1	0	SFARI					2	1
ENSMUSG00000035011	Zbtb7a	0.0120596	0.0171229	0.101739	0.0206826	0.175	0.119	1	0	SFARI						1
ENSMUSG00000051527	Usp29	0.0122013	0.00539268	0.125773	0.00622488	0.709	0.63	1	0
ENSMUSG00000040327	Cul9	0.0122914	0.013502	0.0828439	0.0153078	0.252	0.187667	1	0
ENSMUSG00000035530	Eif1	0.0123042	0.0161152	0.162037	0.0319175	0.373	0.308667	1	0
ENSMUSG00000078816	Prkcg	0.0123053	0.0123048	0.0893818	0.0193179	0.154	0.102667	1	0
ENSMUSG00000049680	Urgcp	0.0123099	0.0116484	0.100202	0.0161302	0.311	0.246	1	0
ENSMUSG00000001120	Pcbp3	0.0123623	0.0158964	0.101288	0.0238264	0.288	0.220333	1	0
ENSMUSG00000002546	Golga2	0.0123659	0.00890173	0.0607537	0.00564146	0.103	0.0623333	1	0
ENSMUSG00000006576	Slc4a3	0.0125268	0.0146517	0.119002	0.0335025	0.44	0.356	1	0
ENSMUSG00000047215	Rpl9	0.0125695	0.0107631	0.078419	0.00790076	0.187	0.130667	1	0
ENSMUSG00000022105	Rb1	0.012575	0.0122866	-0.099347	0.0213407	0.219	0.278333	1	0
ENSMUSG00000037126	Psd	0.0125857	0.0150013	0.104192	0.0213541	0.225	0.164333	1	0
ENSMUSG00000018765	Fxr2	0.012596	0.00997656	0.074533	0.0082677	0.185	0.131	1	0
ENSMUSG00000003948	Mmd	0.0126605	0.00334802	0.0611389	0.00442877	0.159	0.109333	1	0
ENSMUSG00000022843	Clcn2	0.0126806	0.00896873	0.0976094	0.0134137	0.242	0.184	1	0
ENSMUSG00000038718	Pbx3	0.0127098	0.0108351	-0.148536	0.0296676	0.869	0.880333	1	0
ENSMUSG00000072501	Phf20l1	0.0127752	0.0109734	-0.160616	0.0180779	0.614	0.638667	1	0
ENSMUSG00000037579	Kcnh3	0.0128067	0.0124916	0.106989	0.0107875	0.242	0.185	1	0
ENSMUSG00000022949	Clic6	0.012852	0.0189056	0.113909	0.0153038	0.139	0.0886667	1	0
ENSMUSG00000089917	Uckl1	0.0129509	0.00826449	0.0700969	0.00814404	0.142	0.0953333	1	0
ENSMUSG00000022973	Synj1	0.0132213	0.018555	-0.13765	0.0280931	0.392	0.454667	1	0	SFARI					2	0
ENSMUSG00000031622	Sin3b	0.0132565	0.012453	0.0746232	0.0226018	0.144	0.0926667	1	0	SFARI					2	1
ENSMUSG00000070002	Ell	0.0132814	0.00159618	0.0794138	0.00439784	0.167	0.118667	1	0
ENSMUSG00000031256	Cstf2	0.0133026	0.00973764	0.0791946	0.00960719	0.275	0.208333	1	0
ENSMUSG00000025369	Smarcc2	0.0133055	0.0184974	0.0943175	0.0135786	0.189	0.132667	1	0	SFARI;EAGLE;TADA	7.86e-05	Moderate	10	Discordant	1	1
ENSMUSG00000028289	Epha7	0.0133331	0.0155823	-0.149055	0.0207115	0.675	0.717	1	0
ENSMUSG00000035900	Gramd4	0.0133446	0.0104174	0.0685863	0.00976155	0.156	0.105667	1	0	EAGLE		No scorable evidence	0	Concordant
ENSMUSG00000040420	Cdh18	0.0134018	0.00254069	-0.215963	0.0197031	0.452	0.510667	1	0
ENSMUSG00000033597	Caskin1	0.0135195	0.018694	0.0712896	0.0145405	0.109	0.0636667	1	0	SFARI					2	0
ENSMUSG00000026269	Rnpepl1	0.0136007	0.0106092	0.0591771	0.00807341	0.104	0.0636667	1	0
ENSMUSG00000035202	Lars2	0.0139198	0.020135	0.140598	0.0229228	0.492	0.421333	1	0
ENSMUSG00000035203	Epn1	0.014036	0.0135089	0.0797237	0.013359	0.184	0.13	1	0
ENSMUSG00000005705	Agrp	0.0140517	0.0133044	0.108516	0.0217199	0.222	0.159	1	0
ENSMUSG00000026312	Cdh7	0.0144122	0.0193612	0.137828	0.0269583	0.328	0.265667	1	0
ENSMUSG00000041135	Ripk2	0.0145016	0.0175759	0.0732237	0.0157575	0.179	0.124333	1	0
ENSMUSG00000029438	Bcl7a	0.0145252	0.0133116	0.0555352	0.00719195	0.103	0.0623333	1	0
ENSMUSG00000061410	Zcchc14	0.0145624	0.0177562	0.103605	0.0198369	0.27	0.202	1	0
ENSMUSG00000022390	Zc3h7b	0.0147568	0.0141197	0.080611	0.012957	0.164	0.111	1	0
ENSMUSG00000025651	Uqcrc1	0.0147793	0.0108574	0.0830536	0.00862048	0.197	0.144667	1	0
ENSMUSG00000039205	Ciz1	0.0148039	0.0150148	0.0590804	0.0059146	0.106	0.065	1	0
ENSMUSG00000062070	Pgk1	0.0148103	0.0183287	0.0790283	0.00769841	0.151	0.101	1	0
ENSMUSG00000054423	Cadps	0.0148302	0.0239775	-0.163939	0.0386901	0.624	0.679667	1	0	SFARI					2	0
ENSMUSG00000035486	Plk5	0.0149483	0.00642199	0.0906589	0.00539019	0.141	0.096	1	0
ENSMUSG00000015143	Actn1	0.0149573	0.0125017	0.126682	0.0187995	0.702	0.660667	1	0
ENSMUSG00000097820	E530011L22Rik	0.0150295	0.00313109	0.0807199	0.0136943	0.215	0.161333	1	0
ENSMUSG00000039202	Abhd2	0.0150928	0.0167577	0.130713	0.0259201	0.417	0.35	1	0
ENSMUSG00000075700	Selenot	0.0151736	0.00466421	-0.0729911	0.00236968	0.098	0.143	1	0
ENSMUSG00000035725	Prkx	0.0152417	0.00927629	0.0820067	0.00759722	0.159	0.111	1	0
ENSMUSG00000039375	Wdr17	0.0152476	0.00619682	0.127914	0.00815003	0.714	0.663333	1	0
ENSMUSG00000029359	Tesc	0.0152524	0.00672136	0.0889699	0.00673218	0.338	0.271667	1	0
ENSMUSG00000020290	Xpo1	0.0153011	0.0203579	0.113585	0.0213494	0.255	0.194667	1	0	SFARI					2	0
ENSMUSG00000020708	Psmc5	0.0153776	0.0213953	0.0630444	0.0152522	0.101	0.0586667	1	0
ENSMUSG00000059518	Znhit1	0.015498	0.0198783	0.0699915	0.0112013	0.104	0.0626667	1	0
ENSMUSG00000024571	Naa12	0.0155119	0.0218031	0.0592764	0.0102547	0.103	0.0603333	1	0
ENSMUSG00000023044	Csad	0.0155275	0.00962277	0.0637958	0.00443028	0.159	0.109667	1	0
ENSMUSG00000020321	Mdh1	0.0155333	0.0121386	0.119548	0.0233469	0.442	0.371333	1	0
ENSMUSG00000027221	Chst1	0.015578	0.013363	0.098168	0.0304118	0.245	0.184333	1	0
ENSMUSG00000025372	Baiap2	0.015703	0.0168009	0.11492	0.0243897	0.833	0.779333	1	0
ENSMUSG00000025362	Rps26	0.0157149	0.0160846	0.0944392	0.0181055	0.151	0.101333	1	0
ENSMUSG00000068740	Celsr2	0.0157925	0.0145187	0.0758681	0.0187478	0.169	0.118667	1	0
ENSMUSG00000052512	Nav2	0.0158199	0.0206559	-0.122791	0.0255658	0.618	0.668667	1	0	SFARI					2	0
ENSMUSG00000021681	Aggf1	0.0158268	0.00439512	0.0696635	0.00333614	0.127	0.085	1	0
ENSMUSG00000002997	Prkar2b	0.0158355	0.0192499	0.101614	0.0199125	0.626	0.558	1	0
ENSMUSG00000025318	Jph3	0.0158592	0.0100807	0.0829557	0.0115792	0.185	0.135	1	0
ENSMUSG00000039278	Pcsk1n	0.0159651	0.0134529	0.109073	0.00261794	0.462	0.392333	1	0
ENSMUSG00000035183	Slc24a5	0.0161034	0.0135286	0.0673677	0.0166187	0.175	0.122	1	0
ENSMUSG00000039953	Clstn1	0.0161856	0.0130163	0.10171	0.0269296	0.439	0.366	1	0
ENSMUSG00000046182	Gsg1l	0.0162442	0.0244884	0.113794	0.0362972	0.538	0.460667	1	0
ENSMUSG00000063229	Ldha	0.0164538	0.0105275	0.0628066	0.0101513	0.111	0.0703333	1	0
ENSMUSG00000061143	Maml3	0.01646	0.0238191	0.129239	0.0197536	0.517	0.436667	1	0
ENSMUSG00000001150	Mcm3ap	0.0165134	0.0119137	0.0846142	0.0220557	0.257	0.195667	1	0
ENSMUSG00000087361	0610043K17Rik	0.0165264	0.0176989	0.0695734	0.0101579	0.119	0.0763333	1	0
ENSMUSG00000066551	Hmgb1	0.0167488	0.0247068	0.0679123	0.0159903	0.119	0.074	1	0
ENSMUSG00000046434	Hnrnpa1	0.016805	0.0242007	0.113324	0.0195151	0.242	0.183333	1	0
ENSMUSG00000063576	Klhdc3	0.0168493	0.020692	0.059361	0.0089749	0.104	0.0633333	1	0
ENSMUSG00000097330	Gm26672	0.01687	0.0225921	0.151708	0.0368024	0.305	0.239667	1	0
ENSMUSG00000022704	Qtrt2	0.0169592	0.0160752	0.0784072	0.0220947	0.184	0.128	1	0
ENSMUSG00000038910	Plcl2	0.01704	0.0148122	-0.115281	0.0104944	0.826	0.847667	1	0
ENSMUSG00000086212	Mkln1os	0.0171262	0.0157978	0.0707108	0.00580411	0.123	0.08	1	0
ENSMUSG00000032966	Fkbp1a	0.0171578	0.0167191	0.0770091	0.0142951	0.341	0.273333	1	0
ENSMUSG00000032435	Dync1li1	0.0174713	0.0189885	0.0740209	0.0196577	0.187	0.133333	1	0
ENSMUSG00000068206	Pick1	0.0175347	0.0173143	0.0546481	0.0123824	0.108	0.0663333	1	0
ENSMUSG00000064105	Cnnm2	0.0176448	0.0115064	-0.10878	0.00322193	0.316	0.376333	1	0
ENSMUSG00000044288	Cnr1	0.0176853	0.00667736	-0.194176	0.0288226	0.391	0.442667	1	0	SFARI					2	0
ENSMUSG00000004798	Ulk2	0.0177233	0.014121	0.140339	0.00999805	0.459	0.389667	1	0
ENSMUSG00000040818	Dennd6a	0.0178348	0.0122398	0.0836506	0.0127535	0.44	0.363667	1	0
ENSMUSG00000075706	Gpx4	0.0178765	0.00729635	0.0668212	0.00584218	0.118	0.0773333	1	0
ENSMUSG00000009741	Ubp1	0.0179154	0.0161774	0.110764	0.0133433	0.404	0.34	1	0
ENSMUSG00000026443	Lrrn2	0.0179581	0.00645589	0.0869856	0.00888821	0.323	0.262	1	0
ENSMUSG00000024773	Atg2a	0.0182259	0.0191588	0.0586148	0.00932351	0.103	0.0636667	1	0
ENSMUSG00000036850	Mrpl41	0.0183083	0.0149317	0.0615534	0.0176508	0.253	0.190333	1	0
ENSMUSG00000031485	Plpbp	0.0185021	0.0113814	0.0602235	0.00510347	0.207	0.152333	1	0
ENSMUSG00000014077	Chp1	0.0185877	0.0299514	0.0706181	0.0232781	0.146	0.092	1	0
ENSMUSG00000039367	Sec24c	0.0187546	0.0100362	0.053055	0.0051337	0.108	0.0686667	1	0
ENSMUSG00000026860	Sh3glb2	0.0188515	0.0169767	0.0740279	0.020242	0.209	0.151	1	0
ENSMUSG00000007670	Khsrp	0.0188813	0.0167024	0.0839808	0.0171863	0.217	0.161333	1	0
ENSMUSG00000038020	Rapgefl1	0.018966	0.016204	0.0585483	0.0164443	0.126	0.0783333	1	0
ENSMUSG00000022752	Tomm70a	0.018978	0.0149419	0.121741	0.0257176	0.555	0.505667	1	0
ENSMUSG00000013663	Pten	0.0189925	0.0236223	-0.128336	0.0199773	0.611	0.652333	1	0	SFARI;EAGLE;TADA	0	Definitive	63.15	Concordant	1	1
ENSMUSG00000048644	Ctxn1	0.0190419	0.0107923	0.0908656	0.0034538	0.227	0.174333	1	0
ENSMUSG00000029050	Ski	0.0190879	0.0183207	0.0919505	0.0233346	0.445	0.373	1	0	SFARI;EAGLE;TADA	0.00113468	Limited	4.25	Discordant	1	0
ENSMUSG00000042700	Sipa1l1	0.0190879	0.0130152	0.0861709	0.01348	0.965	0.956333	1	0
ENSMUSG00000059409	Ppp2r5d	0.0191738	0.0205051	0.0894797	0.0209676	0.187	0.133	1	0	SFARI;EAGLE;TADA	0.00157884	Moderate	8.5	Discordant	1	1
ENSMUSG00000030811	Fbxl19	0.0191986	0.0140182	0.0594573	0.0163832	0.174	0.122333	1	0
ENSMUSG00000054013	Tmem179	0.0192259	0.0162021	0.0695628	0.00454424	0.126	0.0833333	1	0
ENSMUSG00000020516	Rps6kb1	0.0192917	0.0187683	0.0852885	0.0228828	0.416	0.343	1	0
ENSMUSG00000038141	Tmem181a	0.0193796	0.0202842	0.0598222	0.00839164	0.209	0.152333	1	0
ENSMUSG00000034275	Igsf9b	0.01942	0.0252943	0.101443	0.0254323	0.267	0.206333	1	0
ENSMUSG00000096054	Syne1	0.0194539	0.012506	0.0797059	0.00410503	0.987	0.977333	1	0	SFARI					2	1
ENSMUSG00000028803	Nipal3	0.0195013	0.0233594	0.0698234	0.0151641	0.134	0.0893333	1	0
ENSMUSG00000017167	Cntnap1	0.019528	0.028443	0.104487	0.0281601	0.177	0.121667	1	0
ENSMUSG00000024896	Minpp1	0.0196577	0.017215	0.0764846	0.0126894	0.139	0.0946667	1	0
ENSMUSG00000000766	Oprm1	0.0197544	0.0219836	0.0969547	0.033525	0.179	0.127	1	0
ENSMUSG00000052298	Cdc42se2	0.0197734	0.0177018	0.085013	0.0155268	0.313	0.248333	1	0
ENSMUSG00000025738	Fbxl16	0.0197804	0.0303927	0.118482	0.0346882	0.455	0.38	1	0
ENSMUSG00000089715	Cbx6	0.0199549	0.0203018	0.0937183	0.00828741	0.273	0.211333	1	0
ENSMUSG00000021807	Rtraf	0.0199686	0.00353354	0.0582402	0.00128639	0.106	0.0686667	1	0
ENSMUSG00000079055	Slc8a3	0.0201432	0.0121333	-0.100927	0.0237892	0.341	0.404	1	0
ENSMUSG00000038708	Golga4	0.0201817	0.0201652	0.085308	0.0235393	0.472	0.389333	1	0
ENSMUSG00000030310	Slc6a1	0.0202626	0.019818	0.127798	0.0314024	0.406	0.344333	1	0	SFARI;EAGLE;TADA	5.91e-10	Definitive	31.15	Concordant	1	1
ENSMUSG00000025092	Hspa12a	0.0203541	0.00810647	0.0783714	0.00900527	0.22	0.168667	1	0
ENSMUSG00000045427	Hnrnph2	0.0204215	0.0117956	0.0660005	0.00354192	0.195	0.144	1	0	SFARI					1	0
ENSMUSG00000029577	Ube3b	0.0204522	0.00624005	0.0583687	0.00441193	0.118	0.0776667	1	0
ENSMUSG00000013160	Atp6v0d1	0.0204669	0.0232274	0.0701845	0.0192749	0.209	0.153667	1	0
ENSMUSG00000046480	Scn4b	0.0205491	0.0204866	0.105962	0.0144829	0.374	0.310333	1	0
ENSMUSG00000024505	Dtwd2	0.0205554	0.0218886	0.0688699	0.0153755	0.119	0.0776667	1	0
ENSMUSG00000018171	Vmp1	0.0206123	0.0166592	-0.107909	0.00913655	0.43	0.483667	1	0
ENSMUSG00000003518	Dusp3	0.0208783	0.0147286	-0.0894876	0.0143422	0.121	0.166667	1	0
ENSMUSG00000038370	Pcp4l1	0.0209236	0.0125619	0.065647	0.0159415	0.285	0.223	1	0
ENSMUSG00000038690	Atp5j2	0.0209412	0.020323	0.0846073	0.00974716	0.159	0.112667	1	0
ENSMUSG00000026585	Kifap3	0.0209822	0.015236	0.0955614	0.017639	0.675	0.617	1	0
ENSMUSG00000038608	Dock10	0.0209909	0.0213307	-0.166083	0.0140203	0.437	0.489667	1	0
ENSMUSG00000030994	D7Ertd443e	0.0210033	0.0172298	-0.107692	0.0146775	0.182	0.232	1	0
ENSMUSG00000036053	Fmnl2	0.0211096	0.0279553	-0.0691927	0.01437	0.081	0.125667	1	0
ENSMUSG00000060703	Cd302	0.021156	0.0147041	0.0543077	0.0101513	0.114	0.074	1	0
ENSMUSG00000024006	Stk38	0.0213649	0.0208844	-0.0883989	0.0112394	0.248	0.310333	1	0
ENSMUSG00000001127	Araf	0.0214977	0.0209215	0.0956936	0.0262364	0.381	0.317667	1	0
ENSMUSG00000072769	Gm10419	0.0215906	0.0235477	0.111572	0.0331812	0.47	0.393667	1	0
ENSMUSG00000025868	Higd2a	0.0215958	0.0214024	0.0553903	0.0142969	0.124	0.0806667	1	0
ENSMUSG00000051166	Eml5	0.0217165	0.0119259	-0.124074	0.0103171	0.81	0.832	1	0
ENSMUSG00000062257	Opcml	0.0219425	0.0372666	-0.109074	0.0437625	0.962	0.973333	1	0
ENSMUSG00000007617	Homer1	0.0220111	0.0183339	-0.0314985	0.0276208	0.904	0.905667	1	0	SFARI					2	0
ENSMUSG00000027347	Rasgrp1	0.0220934	0.0318475	0.114579	0.0343575	0.528	0.453333	1	0
ENSMUSG00000030647	Ndufc2	0.0221753	0.00741046	0.0663467	0.00424323	0.159	0.113667	1	0
ENSMUSG00000098066	Gm26944	0.0222004	0.00826741	0.0599449	0.00919506	0.109	0.0713333	1	0
ENSMUSG00000001472	Tcf25	0.0222515	0.0169711	0.0933661	0.00550893	0.371	0.305667	1	0
ENSMUSG00000037894	H2az1	0.0222882	0.019334	0.0866327	0.0103793	0.189	0.14	1	0
ENSMUSG00000022354	Ndufb9	0.0223184	0.0240377	0.0740155	0.0146616	0.177	0.124333	1	0
ENSMUSG00000038274	Fau	0.0224679	0.0196422	0.0809628	0.0185608	0.2	0.149667	1	0
ENSMUSG00000034675	Dbn1	0.0224797	0.0259629	0.107696	0.02831	0.392	0.327667	1	0
ENSMUSG00000030729	Pgm2l1	0.0224891	0.0312096	0.0860291	0.0246993	0.19	0.135333	1	0
ENSMUSG00000040560	Wdr7	0.0225074	0.0156383	-0.0946121	0.0255237	0.507	0.569	1	0
ENSMUSG00000047842	Diras2	0.0226867	0.0053878	0.0483395	0	0.142	0.098	1	0
ENSMUSG00000005338	Cadm3	0.0228244	0.0224367	0.0877582	0.015992	0.222	0.166	1	0
ENSMUSG00000047284	Neurl4	0.02283	0.0209769	0.0642048	0.00645193	0.101	0.064	1	0
ENSMUSG00000021224	Numb	0.0228602	0.0237386	-0.120979	0.0102181	0.354	0.420667	1	0
ENSMUSG00000027933	Ints3	0.0228905	0.00694746	0.0603736	0.00729451	0.184	0.135	1	0
ENSMUSG00000024687	Osbp	0.0229076	0.0274344	0.0923868	0.0127536	0.265	0.206	1	0
ENSMUSG00000032525	Nktr	0.022916	0.0276394	0.120796	0.0123175	0.671	0.608333	1	0
ENSMUSG00000004383	Large1	0.0229311	0.00741178	-0.113192	0.00481951	0.861	0.879667	1	0
ENSMUSG00000028093	Acp6	0.0229518	0.0146754	0.062155	0.00839888	0.113	0.0743333	1	0
ENSMUSG00000042256	Ptchd4	0.0229987	0.0318679	0.136878	0.0379683	0.368	0.3	1	0
ENSMUSG00000028478	Clta	0.0230285	0.0152961	0.0565344	0.00434063	0.174	0.125333	1	0
ENSMUSG00000028869	Gnl2	0.0232731	0.0171987	0.0633618	0.0173774	0.19	0.138333	1	0
ENSMUSG00000029405	G3bp2	0.0233714	0.0140415	0.0839261	0.0103669	0.356	0.294667	1	0
ENSMUSG00000058600	Rpl30	0.023398	0.0349448	0.0774839	0.0179014	0.169	0.117333	1	0
ENSMUSG00000030411	Nova2	0.023421	0.0186926	0.075059	0.0113437	0.224	0.167667	1	0	SFARI						1
ENSMUSG00000104302	Gm36975	0.0234454	0.019456	0.105871	0.0410716	0.447	0.373333	1	0
ENSMUSG00000052406	Rexo4	0.0234536	0.0241434	0.0808654	0.00953627	0.185	0.136333	1	0
ENSMUSG00000026821	Ralgds	0.0235351	0.00822373	0.0585777	0.00454954	0.126	0.0853333	1	0
ENSMUSG00000023800	Tiam2	0.0235797	0.0155208	0.115305	0.0123413	0.563	0.500667	1	0
ENSMUSG00000025204	Ndufb8	0.0236545	0.0211653	0.0732035	0.0162029	0.149	0.103667	1	0
ENSMUSG00000050321	Neto1	0.0238736	0.0367274	-0.0981597	0.0342973	0.929	0.940333	1	0
ENSMUSG00000067288	Rps28	0.0240594	0.0220705	0.0709665	0.0143433	0.111	0.0703333	1	0
ENSMUSG00000037902	Sirpa	0.0241826	0.02968	0.105917	0.0294575	0.263	0.201	1	0
ENSMUSG00000052997	Uba2	0.0242942	0.0274866	0.0598163	0.0139718	0.187	0.134667	1	0
ENSMUSG00000026499	Acbd3	0.0243367	0.0271306	0.0663173	0.0133414	0.116	0.0733333	1	0
ENSMUSG00000027581	Stmn3	0.0244539	0.032725	0.0819412	0.0247446	0.224	0.167333	1	0
ENSMUSG00000042308	Setd1a	0.0245311	0.00392713	0.076465	0.00872653	0.136	0.0953333	1	0	SFARI;EAGLE;TADA	0.0133752	Limited	4.35	Discordant	1	0
ENSMUSG00000086584	Gm12002	0.0245445	0.0182311	-0.0733203	0.00841232	0.076	0.115	1	0
ENSMUSG00000003660	Snrnp200	0.0246701	0.038351	0.0944436	0.0215376	0.182	0.129333	1	0
ENSMUSG00000030075	Cntn3	0.0247213	0.0187494	0.169896	0.0504084	0.627	0.592667	1	0	SFARI					2	0
ENSMUSG00000036199	Ndufa13	0.0248069	0.0168836	0.0593468	0.009445	0.134	0.0913333	1	0
ENSMUSG00000038671	Arfrp1	0.0249177	0.0254613	0.0580564	0.0131557	0.126	0.0833333	1	0
ENSMUSG00000045967	Gpr158	0.0249336	0.0319408	-0.107691	0.00705223	0.972	0.987333	1	0
ENSMUSG00000020075	Ddx21	0.0249434	0.0239274	0.0710634	0.013805	0.116	0.0753333	1	0
ENSMUSG00000027889	Ampd2	0.0249566	0.0235503	0.0852551	0.0161788	0.154	0.105667	1	0
ENSMUSG00000006057	Atp5g1	0.0250338	0.0148424	0.0871315	0.0126688	0.175	0.13	1	0
ENSMUSG00000032925	Itgbl1	0.0251792	0.0215442	0.104523	0.0231632	0.197	0.146	1	0
ENSMUSG00000023010	Tmbim6	0.0252181	0.0286688	0.0663898	0.018348	0.199	0.145667	1	0
ENSMUSG00000097156	Gm3764	0.0252839	0.0352045	-0.119917	0.0294348	0.224	0.281	1	0
ENSMUSG00000041571	Selenow	0.0252863	0.0266026	0.0723061	0.0246799	0.23	0.168333	1	0
ENSMUSG00000071415	Rpl23	0.0253397	0.00453718	0.058666	0.00506348	0.121	0.0823333	1	0
ENSMUSG00000020368	Canx	0.0255928	0.0190641	0.0953011	0.0171334	0.316	0.255333	1	0
ENSMUSG00000035024	Ncapd3	0.0255943	0.0277632	0.083225	0.0130003	0.293	0.234667	1	0
ENSMUSG00000019828	Grm1	0.0258518	0.0312418	-0.139822	0.040207	0.887	0.906333	1	0
ENSMUSG00000029223	Uchl1	0.0258836	0.0213525	0.0957685	0.0304965	0.323	0.263	1	0
ENSMUSG00000028618	Tmem59	0.0259149	0.0110721	0.110653	0.00197146	0.377	0.320667	1	0
ENSMUSG00000022378	Cyrib	0.0259256	0.0350622	-0.120643	0.0226195	0.581	0.644333	1	0
ENSMUSG00000026773	Pfkfb3	0.0260464	0.0423566	-0.090587	0.0438067	0.171	0.233667	1	0
ENSMUSG00000019986	Ahi1	0.0262815	0.0413695	-0.132827	0.0300941	0.846	0.857667	1	0	SFARI						1
ENSMUSG00000052613	Pcdh15	0.026328	0.0178784	0.111744	0.008677	0.109	0.0716667	1	0	SFARI					2	0
ENSMUSG00000022283	Pabpc1	0.0263329	0.0294976	0.112494	0.0204411	0.306	0.247667	1	0	SFARI					3	0
ENSMUSG00000032330	Cox7a2	0.0263498	0.0289315	0.111992	0.0227561	0.184	0.132667	1	0
ENSMUSG00000022677	Cep20	0.0264701	0.023203	0.0565371	0.00624864	0.139	0.0956667	1	0
ENSMUSG00000030527	Crtc3	0.0264997	0.0245698	0.0626689	0.0315017	0.179	0.126667	1	0
ENSMUSG00000027273	Snap25	0.0265212	0.0229244	0.0844291	0.0188243	0.877	0.841	1	0	SFARI					2	0
ENSMUSG00000033004	Mycbp2	0.0265806	0.0414471	-0.104084	0.0406309	0.932	0.949333	1	0
ENSMUSG00000026926	Pmpca	0.0266225	0.0200851	0.0521728	0.0096627	0.114	0.0743333	1	0
ENSMUSG00000031392	Irak1	0.0266828	0.0430184	0.0919647	0.0291091	0.192	0.133	1	0
ENSMUSG00000020888	Dvl2	0.0267015	0.0208055	0.0707221	0.00980616	0.136	0.0936667	1	0
ENSMUSG00000026853	Crat	0.0267459	0.0375051	0.0774702	0.0201162	0.109	0.0673333	1	0
ENSMUSG00000020198	Ap3d1	0.0269161	0.0230195	0.0685146	0.0196828	0.184	0.134667	1	0
ENSMUSG00000027742	Cog6	0.0270231	0.0191326	0.0743101	0.0097328	0.139	0.097	1	0
ENSMUSG00000021192	Golga5	0.0270492	0.0180638	0.0697344	0.0169501	0.136	0.0946667	1	0
ENSMUSG00000043716	Rpl7	0.02734	0.0216191	0.0580111	0.012247	0.114	0.0743333	1	0
ENSMUSG00000032786	Alas1	0.0273645	0.0418714	0.0612058	0.0190746	0.109	0.065	1	0
ENSMUSG00000037032	Apbb1	0.0273974	0.0135576	0.05928	0.00338296	0.111	0.074	1	0	SFARI;TADA	0.0307911				2	0
ENSMUSG00000023055	Calcoco1	0.0274829	0.0193861	0.101611	0.00680614	0.25	0.199333	1	0
ENSMUSG00000021546	Hnrnpk	0.0275762	0.0288639	0.133701	0.0189806	0.366	0.314333	1	0	SFARI					2	1
ENSMUSG00000024222	Fkbp5	0.0276582	0.00407521	0.0938451	0.00820638	0.192	0.146667	1	0
ENSMUSG00000052144	Ppp4r2	0.027682	0.0378667	0.0862229	0.0169217	0.306	0.241667	1	0
ENSMUSG00000086308	G630016G05Rik	0.0277243	0.0413163	0.0925848	0.0236443	0.252	0.192333	1	0
ENSMUSG00000000631	Myo18a	0.0277648	0.0250651	0.0975583	0.01663	0.368	0.309667	1	0
ENSMUSG00000021951	Eef1akmt1	0.0277781	0.0119583	0.0567381	0.00771859	0.116	0.0776667	1	0
ENSMUSG00000024054	Smchd1	0.0278549	0.0147253	0.111567	0.0198812	0.358	0.302667	1	0
ENSMUSG00000027655	Dhx35	0.0278677	0.0181907	0.0717288	0.0108672	0.161	0.116667	1	0
ENSMUSG00000027132	Katnbl1	0.0281483	0.0239688	0.0532987	0.0156775	0.132	0.0893333	1	0
ENSMUSG00000009079	Ewsr1	0.028176	0.0174045	0.0958576	0.010991	0.672	0.61	1	0
ENSMUSG00000022234	Cct5	0.0281924	0.0148162	0.0531353	0.00514162	0.108	0.0713333	1	0
ENSMUSG00000022037	Clu	0.028226	0.0224107	0.0691458	0.00962766	0.108	0.071	1	0
ENSMUSG00000035390	Brsk1	0.0282262	0.023652	0.0854654	0.0229792	0.189	0.138667	1	0
ENSMUSG00000113907	Gm47167	0.0282652	0.00434857	0.0721369	0.00448164	0.141	0.100333	1	0
ENSMUSG00000032985	5730522E02Rik	0.0283546	0.0155989	-0.0953624	0.0235192	0.887	0.899667	1	0
ENSMUSG00000021290	Atp5mpl	0.0285389	0.0282983	0.0647074	0.0161742	0.111	0.0706667	1	0
ENSMUSG00000052139	Babam2	0.0286666	0.0242321	-0.110074	0.0217271	0.369	0.429333	1	0
ENSMUSG00000021124	Vti1b	0.0287015	0.0247431	-0.0864977	0.0231924	0.262	0.322667	1	0
ENSMUSG00000028106	Rprd2	0.0287326	0.0263857	0.100315	0.007741	0.407	0.348667	1	0
ENSMUSG00000032289	Thsd4	0.0287478	0.0305641	-0.10047	0.0289684	0.169	0.225667	1	0
ENSMUSG00000037259	Dzank1	0.028953	0.0344039	0.124378	0.0414319	0.465	0.399333	1	0
ENSMUSG00000024268	Celf4	0.0290018	0.0201425	0.115273	0.00945279	0.651	0.576667	1	0	SFARI;EAGLE;TADA	0.0208728	Moderate	8.5	Discordant	1	0
ENSMUSG00000028932	Psmc2	0.0290712	0.021658	0.0809569	0.0162942	0.214	0.162333	1	0
ENSMUSG00000026775	Yme1l1	0.0290794	0.0283657	0.135467	0.0316858	0.45	0.389333	1	0
ENSMUSG00000040640	Erc2	0.0291101	0.0315588	-0.091474	0.0214708	1	0.997333	1	0
ENSMUSG00000027223	Mapk8ip1	0.0291352	0.0197458	0.0624934	0.0101454	0.233	0.179667	1	0	SFARI					3	0
ENSMUSG00000068151	A230006K03Rik	0.0291638	0.0343804	0.161462	0.0338082	0.793	0.769	1	0
ENSMUSG00000024109	Nrxn1	0.0293568	0.0293319	-0.091698	0.0147951	0.952	0.964667	1	0	SFARI;EAGLE		Definitive	143.75	Concordant	1	0
ENSMUSG00000030122	Ptms	0.0294041	0.0278338	0.0730202	0.0107492	0.281	0.224	1	0
ENSMUSG00000029053	Prkcz	0.0294624	0.0326757	0.110027	0.0344751	0.52	0.461333	1	0
ENSMUSG00000024548	Setbp1	0.0294761	0.038039	-0.134464	0.0276459	0.477	0.536667	1	0	SFARI					1	0
ENSMUSG00000070304	Scn2b	0.0295139	0.0373565	0.0771962	0.0110786	0.139	0.0956667	1	0
ENSMUSG00000031985	Gnpat	0.0295566	0.0234345	0.0681231	0.0107494	0.174	0.127333	1	0
ENSMUSG00000041881	Ndufa7	0.0296533	0.0121827	0.0728274	0.00213417	0.151	0.108667	1	0
ENSMUSG00000070047	Fat1	0.0298014	0.00723743	0.0829633	0.00675115	0.108	0.073	1	0	SFARI					2	0
ENSMUSG00000022895	Ets2	0.0298087	0.0264103	0.059928	0.00337704	0.111	0.0733333	1	0
ENSMUSG00000023951	Vegfa	0.0298402	0.0250118	0.038674	0.0166192	0.106	0.068	1	0
ENSMUSG00000068373	D430041D05Rik	0.0298621	0.046579	-0.129031	0.0330712	0.772	0.796333	1	0
ENSMUSG00000036478	Btg1	0.0299135	0.0258892	0.0775998	0.0242412	0.127	0.0833333	1	0
ENSMUSG00000040724	Kcna2	0.0299281	0.0488148	0.0822402	0.0236941	0.169	0.116333	1	0	SFARI						1
ENSMUSG00000033577	Myo6	0.0299534	0.0353173	-0.0573821	0.0211547	0.071	0.111667	1	0
ENSMUSG00000071359	Tbpl1	0.0300617	0.0355705	0.063403	0.0146617	0.108	0.0686667	1	0
ENSMUSG00000031818	Cox4i1	0.0300781	0.027809	0.120294	0.0229397	0.3	0.248667	1	0
ENSMUSG00000018965	Ywhah	0.0301129	0.00930599	0.0412615	0.00583325	0.104	0.0686667	1	0
ENSMUSG00000059326	Csf2ra	0.0301418	0.0221953	0.0658722	0.00364526	0.169	0.124333	1	0
ENSMUSG00000026924	Sec16a	0.0303726	0.0171677	0.0689864	0.00682168	0.161	0.117	1	0
ENSMUSG00000028964	Park7	0.0304008	0.0202292	0.0598289	0.00719195	0.101	0.066	1	0
ENSMUSG00000061576	Dpp6	0.030438	0.0374893	-0.0990811	0.0248657	0.96	0.956667	1	0	SFARI					2	0
ENSMUSG00000037533	Rapgef6	0.0305514	0.0467062	-0.127815	0.0234046	0.689	0.739	1	0
ENSMUSG00000021134	Srsf5	0.0305573	0.0145305	0.129172	0.00936185	0.671	0.64	1	0
ENSMUSG00000036617	Etl4	0.0305872	0.0360368	-0.149137	0.0313114	0.652	0.691	1	0
ENSMUSG00000030284	Creld1	0.0306421	0.0140928	0.0747701	0.00319584	0.172	0.129	1	0
ENSMUSG00000024597	Slc12a2	0.0307	0.0189169	-0.0629098	0.00736877	0.076	0.113667	1	0
ENSMUSG00000027637	Rab5if	0.0307589	0.0360712	0.0688685	0.00973042	0.141	0.0976667	1	0
ENSMUSG00000036138	Acaa1a	0.0308513	0.0343786	0.056982	0.0124075	0.131	0.089	1	0
ENSMUSG00000041028	Ghitm	0.0308699	0.0122638	0.0715009	0.00440429	0.166	0.122667	1	0
ENSMUSG00000036019	Tmtc2	0.0308799	0.027301	-0.11626	0.0122691	0.255	0.309	1	0
ENSMUSG00000029033	Acap3	0.0308939	0.0336344	0.0539535	0.0152017	0.159	0.111667	1	0
ENSMUSG00000032076	Cadm1	0.0309125	0.0136037	0.152842	0.0200164	0.727	0.694333	1	0	SFARI					2	0
ENSMUSG00000084786	Ubl5	0.030924	0.0177168	0.071334	0.00456336	0.119	0.0823333	1	0
ENSMUSG00000022094	Slc39a14	0.0309785	0.0157596	0.0614064	0.00504814	0.121	0.0826667	1	0
ENSMUSG00000019996	Map7	0.0310515	0.0399641	-0.144033	0.0326575	0.46	0.505667	1	0
ENSMUSG00000028959	Fastk	0.0310667	0.0478526	0.0830019	0.0177975	0.174	0.122667	1	0
ENSMUSG00000046101	Mcmdc2	0.031351	0.0305042	0.0626441	0.012323	0.103	0.0653333	1	0
ENSMUSG00000035770	Dync1li2	0.0314905	0.030583	0.0828286	0.015809	0.298	0.239667	1	0
ENSMUSG00000087202	Gm15813	0.0314994	0.0408037	0.103541	0.0296636	0.406	0.331667	1	0
ENSMUSG00000035640	Cbarp	0.0315061	0.049542	0.0759022	0.0303201	0.219	0.16	1	0
ENSMUSG00000019373	Cops3	0.0315502	0.0268923	0.0590792	0.0140204	0.166	0.118333	1	0
ENSMUSG00000063882	Uqcrh	0.0317575	0.0254677	0.0580545	0.0056021	0.151	0.107667	1	0
ENSMUSG00000020070	Rufy2	0.0318055	0.00558123	0.0851352	0.00171954	0.363	0.306667	1	0
ENSMUSG00000017740	Slc12a5	0.0318185	0.0337012	0.127172	0.0370584	0.437	0.378	1	0	SFARI					2	0
ENSMUSG00000015095	Fbxw5	0.0319009	0.0304365	0.0515438	0.0150419	0.111	0.0733333	1	0
ENSMUSG00000030516	Tjp1	0.0320196	0.0292936	-0.113131	0.0244343	0.73	0.77	1	0
ENSMUSG00000027200	Sema6d	0.0321125	0.0193239	0.113282	0.0100458	0.376	0.312667	1	0
ENSMUSG00000021619	Atg10	0.0321252	0.0172388	-0.107032	0.00942816	0.204	0.252333	1	0
ENSMUSG00000021071	Trim9	0.0323622	0.0249973	-0.112081	0.0295242	0.735	0.782	1	0
ENSMUSG00000008604	Ubqln4	0.0324167	0.0116361	0.0653004	0.00332607	0.129	0.0913333	1	0
ENSMUSG00000013787	Ehmt2	0.0325602	0.0425339	0.0682754	0.0188805	0.169	0.120667	1	0
ENSMUSG00000022680	Pdxdc1	0.0325916	0.0354268	0.0480779	0.0212127	0.21	0.156333	1	0
ENSMUSG00000019254	Ppp1r12c	0.0326089	0.0392849	0.0842732	0.026262	0.233	0.179	1	0
ENSMUSG00000040054	Baz2a	0.0328492	0.0256898	0.0747082	0.0166169	0.2	0.152333	1	0
ENSMUSG00000006273	Atp6v1b2	0.0328753	0.0170667	0.0911577	0.0119334	0.373	0.311333	1	0
ENSMUSG00000024544	Ldlrad4	0.0329905	0.0532222	-0.122807	0.061955	0.745	0.797333	1	0
ENSMUSG00000040356	Skiv2l	0.0329995	0.018291	0.0568511	0.00668952	0.104	0.0696667	1	0
ENSMUSG00000032959	Pebp1	0.0330427	0.0379721	0.0707217	0.0126216	0.182	0.133667	1	0
ENSMUSG00000040536	Necab1	0.0330714	0.0336692	-0.143041	0.0217685	0.563	0.595333	1	0
ENSMUSG00000034761	Map4k5	0.0332325	0.0341789	-0.0876185	0.0448431	0.31	0.379	1	0
ENSMUSG00000051853	Arf3	0.0333373	0.0202286	0.073561	0.00647231	0.325	0.264333	1	0	TADA	0.0920637
ENSMUSG00000029063	Nadk	0.0333414	0.0206722	0.0474308	0.00682849	0.152	0.109333	1	0
ENSMUSG00000020022	Ndufa12	0.0333908	0.0127259	0.0685345	0.00546449	0.129	0.0913333	1	0
ENSMUSG00000020496	Rnf187	0.0333909	0.0232848	0.0550388	0.0103423	0.124	0.085	1	0
ENSMUSG00000056820	Tsnax	0.0334758	0.0218029	0.0932812	0.0158881	0.3	0.243667	1	0
ENSMUSG00000101693	Gm19461	0.033553	0.0198057	0.061421	0.00941153	0.129	0.0903333	1	0
ENSMUSG00000019820	Utrn	0.03356	0.0336638	-0.128097	0.0140242	0.677	0.733	1	0
ENSMUSG00000003974	Grm3	0.0335962	0.044453	-0.134485	0.071869	0.79	0.833333	1	0
ENSMUSG00000022537	Tmem44	0.0336463	0.0202739	0.0448104	0.00834753	0.113	0.0753333	1	0
ENSMUSG00000051790	Nlgn2	0.0339885	0.0314537	0.0642856	0.0259688	0.228	0.172333	1	0	SFARI;EAGLE		Limited	3	Discordant	1	0
ENSMUSG00000040459	Arglu1	0.0341838	0.0510192	0.118212	0.0305297	0.873	0.837	1	0
ENSMUSG00000056091	St3gal5	0.0341952	0.0291718	0.107055	0.0281816	0.315	0.255	1	0
ENSMUSG00000037410	Tbc1d2b	0.0342199	0.0176137	0.0483455	0.00992586	0.116	0.079	1	0
ENSMUSG00000054871	Tmem158	0.0345571	0.0293711	0.0801896	0.0204072	0.371	0.308667	1	0
ENSMUSG00000034024	Cct2	0.034989	0.0493876	0.054099	0.0152577	0.132	0.0883333	1	0
ENSMUSG00000013858	Tmem259	0.0350668	0.0231152	0.0666163	0.0101877	0.144	0.103333	1	0
ENSMUSG00000061559	Wdr61	0.0350897	0.0204171	0.0535469	0.00127654	0.108	0.0723333	1	0
ENSMUSG00000021701	Plk2	0.0351191	0.0264446	0.105189	0.0185534	0.545	0.487667	1	0
ENSMUSG00000025290	Rps24	0.0352311	0.0154299	0.0573028	0.00538346	0.141	0.100667	1	0
ENSMUSG00000034245	Hdac11	0.035341	0.0546896	0.0664957	0.0289256	0.149	0.0993333	1	0
ENSMUSG00000026360	Rgs2	0.035682	0.032015	0.151287	0.0316953	0.291	0.237667	1	0
ENSMUSG00000035674	Ndufa3	0.0357421	0.0371794	0.0702618	0.0186003	0.126	0.086	1	0
ENSMUSG00000020412	Ascc2	0.0357732	0.0530207	0.090927	0.0219783	0.205	0.151667	1	0
ENSMUSG00000052539	Magi3	0.0359421	0.0136163	-0.0849788	0.0078733	0.228	0.279667	1	0
ENSMUSG00000028399	Ptprd	0.03596	0.0226925	-0.0712093	0.0104045	0.998	1	1	0
ENSMUSG00000033396	Spg11	0.0360177	0.0223059	0.059096	0.0114162	0.141	0.100333	1	0
ENSMUSG00000007817	Zmiz1	0.0361398	0.0468407	0.0409415	0.0150882	0.101	0.064	1	0	SFARI					2	1
ENSMUSG00000074024	4632427E13Rik	0.0362331	0.0258848	-0.118162	0.0211442	0.3	0.348333	1	0
ENSMUSG00000042719	Naa25	0.036234	0.0296277	0.0640267	0.00870796	0.175	0.129333	1	0
ENSMUSG00000049336	Tenm2	0.0363584	0.059831	-0.15788	0.0527352	0.944	0.958667	1	0
ENSMUSG00000005687	Bcas2	0.036388	0.021206	0.0673704	0.00121864	0.162	0.120667	1	0
ENSMUSG00000023353	Agap3	0.0365229	0.0589016	0.09554	0.0311224	0.305	0.240333	1	0
ENSMUSG00000025316	Banp	0.0366107	0.00887998	-0.0621297	0.00417515	0.214	0.266667	1	0
ENSMUSG00000029283	Cdc7	0.0367117	0.0378817	0.0523886	0.0149448	0.121	0.0806667	1	0
ENSMUSG00000022197	Pdzd2	0.0367447	0.0179353	0.113509	0.0224414	0.826	0.77	1	0
ENSMUSG00000022890	Atp5j	0.0368016	0.0313619	0.101661	0.0248802	0.22	0.169	1	0
ENSMUSG00000041852	Tcf20	0.0369463	0.0139854	-0.0844961	0.0131752	0.68	0.718	1	0	SFARI;EAGLE;TADA	9.63e-05	Definitive	38	Concordant	1	1
ENSMUSG00000002416	Ndufb2	0.037114	0.0211603	0.0615928	0.00559071	0.108	0.073	1	0
ENSMUSG00000058756	Thra	0.0371485	0.0296917	0.108818	0.014409	0.371	0.317333	1	0	SFARI					2	0
ENSMUSG00000035355	Kcnh4	0.0372042	0.0389564	0.0966822	0.0282968	0.333	0.279	1	0
ENSMUSG00000019370	Calm3	0.0373752	0.0584148	0.0693538	0.0233239	0.114	0.0706667	1	0
ENSMUSG00000030020	Prickle2	0.0375314	0.0331349	-0.132097	0.0229871	0.475	0.521	1	0	SFARI					2	0
ENSMUSG00000069049	Eif2s3y	0.0376885	0.0178846	0.0871048	0.0064614	0.359	0.303	1	0
ENSMUSG00000003872	Lin7b	0.0377062	0.0631109	0.069668	0.0289394	0.162	0.108333	1	0	SFARI					2	0
ENSMUSG00000021991	Cacna2d3	0.0378634	0.00919386	-0.0617804	0.00388192	0.998	1	1	0	SFARI;EAGLE		Limited	3.75	Discordant	1	0
ENSMUSG00000047976	Kcna1	0.0379358	0.0306717	0.072464	0.0226994	0.358	0.298333	1	0
ENSMUSG00000022756	Slc7a4	0.0380519	0.0319501	0.059693	0.0125402	0.119	0.081	1	0
ENSMUSG00000018909	Arrb1	0.0380668	0.0367307	0.0747012	0.0189908	0.298	0.241	1	0
ENSMUSG00000094840	Muc3a	0.0381143	0.0394757	0.072334	0.0204607	0.147	0.102	1	0
ENSMUSG00000038805	Six3	0.0383951	0.0479518	0.0749947	0.0118876	0.151	0.108333	1	0
ENSMUSG00000035967	Ints6l	0.0385286	0.044002	0.101811	0.0226167	0.457	0.395	1	0
ENSMUSG00000053119	Chmp3	0.0385691	0.0311616	0.0736415	0.0142122	0.278	0.222667	1	0
ENSMUSG00000025428	Atp5a1	0.0389145	0.00635654	0.105377	0.00165637	0.396	0.343667	1	0
ENSMUSG00000063457	Rps15	0.0390281	0.0499406	0.0898065	0.0244647	0.253	0.196	1	0
ENSMUSG00000024127	Prepl	0.0390745	0.0270226	-0.0750516	0.0158316	0.321	0.379333	1	0
ENSMUSG00000034543	Morc2a	0.0390753	0.0232244	0.084891	0.00932353	0.27	0.219	1	0
ENSMUSG00000018565	Elp5	0.0391111	0.03797	0.058372	0.00583071	0.116	0.0783333	1	0
ENSMUSG00000024188	Luc7l	0.039113	0.0533611	-0.073618	0.0167853	0.207	0.265333	1	0
ENSMUSG00000084947	Gm15594	0.0391819	0.0264611	0.0760135	0.0167187	0.245	0.194	1	0
ENSMUSG00000025537	Phkg1	0.0392705	0.0274913	0.115492	0.0174237	0.113	0.0783333	1	0
ENSMUSG00000032773	Chrm1	0.0394307	0.03558	0.0723694	0.00896858	0.184	0.138667	1	0
ENSMUSG00000034120	Srsf2	0.0395275	0.0502969	0.101865	0.0219324	0.396	0.334667	1	0
ENSMUSG00000020097	Sgpl1	0.0395625	0.0378225	0.0581715	0.00925171	0.103	0.068	1	0
ENSMUSG00000041096	Tspyl2	0.0397267	0.0536048	0.0747426	0.0153055	0.233	0.179667	1	0
ENSMUSG00000035139	Secisbp2	0.0397787	0.0324841	0.0493307	0.00362411	0.167	0.123333	1	0
ENSMUSG00000022494	Shisa9	0.0398825	0.018399	-0.0901172	0.00783219	0.919	0.917333	1	0
ENSMUSG00000061080	Lsamp	0.0399606	0.0415564	0.0928137	0.024296	0.997	1	1	0
ENSMUSG00000059495	Arhgef12	0.0400343	0.0367191	-0.0805893	0.0173302	0.55	0.605667	1	0
ENSMUSG00000028452	Vcp	0.0401486	0.0129302	0.0682572	0.00814735	0.225	0.178	1	0
ENSMUSG00000057719	Sh3rf2	0.0402101	0.0303679	-0.134718	0.0218297	0.435	0.478333	1	0
ENSMUSG00000038502	Ptov1	0.0402523	0.0481035	0.056822	0.00956115	0.154	0.11	1	0
ENSMUSG00000049047	Armcx3	0.040267	0.0178228	0.0636597	0.00216947	0.129	0.092	1	0
ENSMUSG00000070866	Zfp804a	0.0404595	0.0177006	-0.0716718	0.0366836	0.75	0.781	1	0	SFARI					2	0
ENSMUSG00000059291	Rpl11	0.0404802	0.0517359	0.0811606	0.0242973	0.146	0.0983333	1	0
ENSMUSG00000032867	Fbxw8	0.0409788	0.0512892	0.0563263	0.0188702	0.111	0.072	1	0
ENSMUSG00000024044	Epb41l3	0.0410118	0.0376614	-0.103741	0.0234629	0.457	0.507	1	0
ENSMUSG00000025810	Nrp1	0.041059	0.02845	0.0555972	0.0122113	0.131	0.093	1	0
ENSMUSG00000040390	Map3k10	0.0415863	0.0242835	0.0568998	0.00857256	0.152	0.111667	1	0
ENSMUSG00000041164	Zmiz2	0.0415928	0.0373927	0.0593946	0.0139188	0.147	0.105	1	0
ENSMUSG00000029263	Pigg	0.0416972	0.0434495	0.0490981	0.0134321	0.113	0.075	1	0
ENSMUSG00000003469	Phyhip	0.0417555	0.034672	0.0743101	0.0097328	0.139	0.101	1	0
ENSMUSG00000097392	Thoc2l	0.0418181	0.0718205	-0.0948565	0.0401947	0.164	0.232	1	0
ENSMUSG00000034235	Usp54	0.0418834	0.0558957	-0.0587413	0.0168597	0.086	0.127	1	0
ENSMUSG00000034863	Ano8	0.0421641	0.0197031	0.0498582	0.00547273	0.126	0.0886667	1	0
ENSMUSG00000023007	Prpf40b	0.0425571	0.0563984	0.0561852	0.0173201	0.144	0.101333	1	0
ENSMUSG00000004069	Dnaja3	0.0426744	0.0344152	0.0560007	0.0111375	0.134	0.094	1	0
ENSMUSG00000066900	Suds3	0.0428541	0.0371448	-0.0449388	0.00752374	0.073	0.108	1	0
ENSMUSG00000002949	Timm44	0.0429058	0.0706261	0.108088	0.0341639	0.321	0.255	1	0
ENSMUSG00000048490	Nrip1	0.0430902	0.0302334	0.0706604	0.0189883	0.224	0.174667	1	0
ENSMUSG00000041975	Mettl8	0.0431313	0.00200753	-0.0505684	0.00624423	0.111	0.151	1	0
ENSMUSG00000031939	Taf1d	0.0432794	0.0639961	0.0876797	0.0247972	0.263	0.205333	1	0
ENSMUSG00000009927	Rps25	0.0432922	0.0395053	0.0806151	0.0261937	0.164	0.116333	1	0
ENSMUSG00000062151	Unc13c	0.0433025	0.0507112	0.186146	0.0468485	0.818	0.791333	1	0
ENSMUSG00000003992	Ssbp2	0.0433047	0.0287685	-0.0883455	0.0162969	0.906	0.904	1	0
ENSMUSG00000021520	Uqcrb	0.0433497	0.0440441	0.0539262	0.0143838	0.119	0.081	1	0
ENSMUSG00000030930	Chst15	0.0434638	0.0459812	0.0495816	0.0078971	0.123	0.0846667	1	0
ENSMUSG00000032898	Fbxo21	0.0434851	0.0299972	0.0494625	0.0136235	0.118	0.0816667	1	0
ENSMUSG00000066839	Ecsit	0.0436066	0.0374261	0.0616809	0.00805218	0.152	0.111333	1	0
ENSMUSG00000027340	Slc23a2	0.0436606	0.0278583	0.0782391	0.0248969	0.316	0.262667	1	0
ENSMUSG00000015937	Macroh2a1	0.0437469	0.0272171	0.0773624	0.0172205	0.199	0.153333	1	0
ENSMUSG00000078676	Casc3	0.0438055	0.0502047	0.0809258	0.0114288	0.212	0.165	1	0
ENSMUSG00000024534	Sncaip	0.043902	0.0494703	0.0555217	0.0261317	0.252	0.198667	1	0
ENSMUSG00000038095	Sbno1	0.0441854	0.00972201	0.100453	0.0107296	0.485	0.431	1	0
ENSMUSG00000035964	Tmem59l	0.0442257	0.0544217	0.0627889	0.0171576	0.161	0.116333	1	0
ENSMUSG00000020642	Rnf144a	0.0443132	0.0406925	0.0492732	0.0259037	0.164	0.119	1	0
ENSMUSG00000042298	Ttc19	0.0444537	0.00851657	-0.0862349	0.0108756	0.445	0.491667	1	0
ENSMUSG00000024186	Rgs11	0.0445466	0.0591715	0.103962	0.0277981	0.286	0.233333	1	0
ENSMUSG00000085667	Gm12992	0.0448326	0.0405871	0.0582132	0.0100673	0.119	0.082	1	0
ENSMUSG00000033545	Znrf1	0.0450772	0.0111625	-0.0805358	0.0050213	0.594	0.641	1	0
ENSMUSG00000026864	Hspa5	0.0452088	0.0312629	0.0879647	0.00857595	0.262	0.212333	1	0
ENSMUSG00000027544	Nfatc2	0.0452297	0.0293992	0.0767827	0.0136678	0.185	0.144	1	0
ENSMUSG00000033253	Szt2	0.0453051	0.0694192	0.0591583	0.0159171	0.113	0.073	1	0
ENSMUSG00000071054	Safb	0.0453525	0.0376843	0.0729466	0.0245164	0.29	0.233	1	0
ENSMUSG00000031758	Cdyl2	0.0453902	0.0396351	0.0678368	0.0300113	0.202	0.153	1	0
ENSMUSG00000021114	Atp6v1d	0.0455119	0.0365997	0.108081	0.016826	0.29	0.240333	1	0
ENSMUSG00000033871	Ppargc1b	0.0455411	0.0168012	0.0740606	0.00421969	0.384	0.324667	1	0
ENSMUSG00000027642	Rpn2	0.0458492	0.0412687	0.0646382	0.0235161	0.209	0.157333	1	0
ENSMUSG00000036225	Kctd1	0.0458791	0.0294346	-0.0921287	0.0198572	0.588	0.631333	1	0
ENSMUSG00000026516	Nvl	0.0460098	0.0554987	0.105549	0.0400951	0.373	0.313333	1	0
ENSMUSG00000005225	Plekha8	0.046074	0.0360311	0.0533252	0.00915302	0.116	0.0806667	1	0
ENSMUSG00000112201	4930532I03Rik	0.0460911	0.0527175	0.0591431	0.0103638	0.164	0.120333	1	0
ENSMUSG00000021557	Agtpbp1	0.0461576	0.0459684	-0.0990082	0.0155694	0.411	0.468333	1	0
ENSMUSG00000041624	Gucy1a2	0.0465136	0.0304746	-0.0863878	0.0188985	0.705	0.736	1	0	SFARI					2	0
ENSMUSG00000020894	Vamp2	0.04675	0.0411681	0.0541295	0.0166761	0.187	0.141667	1	0	SFARI						1
ENSMUSG00000005886	Ncoa2	0.0467673	0.0711516	-0.146151	0.0429649	0.594	0.642	1	0
ENSMUSG00000038831	Ralgps1	0.0467976	0.0407416	-0.0985652	0.042266	0.427	0.49	1	0
ENSMUSG00000020770	Unk	0.047005	0.0118953	0.0412372	0.00443028	0.142	0.103667	1	0
ENSMUSG00000031516	Dctn6	0.0470236	0.0366286	0.045413	0.00955452	0.114	0.0786667	1	0
ENSMUSG00000011179	Odc1	0.0470878	0.0169343	0.053792	0.00339263	0.103	0.0706667	1	0
ENSMUSG00000023972	Ptk7	0.0472385	0.0505465	0.0507634	0.0193619	0.111	0.073	1	0	SFARI					1	0
ENSMUSG00000024743	Syt7	0.0474291	0.0350872	0.0726569	0.0200494	0.323	0.265333	1	0
ENSMUSG00000032905	Atg12	0.0474494	0.0360482	0.0616286	0.0149058	0.157	0.115333	1	0
ENSMUSG00000031633	Slc25a4	0.0475186	0.0724069	0.0795529	0.0236738	0.278	0.22	1	0
ENSMUSG00000041923	Nol4	0.0475189	0.0250311	-0.114689	0.0156959	0.47	0.513667	1	0
ENSMUSG00000001016	Ilf2	0.0475906	0.0300774	0.0524432	0.0105984	0.157	0.116333	1	0	SFARI					2	0
ENSMUSG00000027618	Nfs1	0.0478255	0.0458022	0.0695599	0.0149038	0.177	0.130667	1	0
ENSMUSG00000023473	Celsr3	0.0478917	0.0548435	0.0525636	0.017526	0.156	0.113333	1	0
ENSMUSG00000052296	Ppp6r1	0.0478941	0.0563081	0.0679761	0.0142985	0.144	0.103667	1	0
ENSMUSG00000024805	Pcgf5	0.0482251	0.0440016	-0.0947076	0.00864937	0.233	0.283333	1	0
ENSMUSG00000028847	Trappc3	0.0483963	0.0450396	0.0630656	0.00887261	0.119	0.084	1	0
ENSMUSG00000019841	Rev3l	0.0486002	0.025558	-0.100966	0.00343954	0.429	0.483667	1	0
ENSMUSG00000025158	Rfng	0.0486391	0.0161721	0.0513785	0.0021793	0.126	0.0906667	1	0
ENSMUSG00000029757	Dync1i1	0.0487176	0.0184877	-0.112267	0.0156062	0.384	0.428667	1	0
ENSMUSG00000038400	Pmepa1	0.0487241	0.067207	0.107493	0.0156544	0.422	0.362	1	0
ENSMUSG00000023051	Tarbp2	0.0487628	0.0495144	0.0526005	0.0110668	0.114	0.0783333	1	0
ENSMUSG00000033991	Ttc37	0.0487721	0.0649771	0.0796255	0.0135878	0.258	0.206	1	0
ENSMUSG00000026761	Orc4	0.0490704	0.0398706	0.0927002	0.0112399	0.616	0.575667	1	0
ENSMUSG00000038535	Zfp280d	0.0491737	0.0373872	0.102857	0.0163377	0.743	0.706	1	0
ENSMUSG00000039478	Micu3	0.0491866	0.0121731	0.0717258	0.00529874	0.482	0.419	1	0
ENSMUSG00000006818	Sod2	0.0492359	0.0234696	0.0572119	0.00900375	0.26	0.210667	1	0
ENSMUSG00000106218	Gm43713	0.0493594	0.0526531	0.0723188	0.0193295	0.19	0.142	1	0
ENSMUSG00000025314	Ptprj	0.0494913	0.061418	0.0983571	0.035982	0.462	0.401667	1	0
ENSMUSG00000019210	Atp6v1e1	0.049526	0.061189	0.07823	0.0194648	0.219	0.171333	1	0
ENSMUSG00000110710	C78859	0.0495985	0.0369056	0.0851861	0.0214779	0.637	0.581667	1	0
ENSMUSG00000030638	Sh3gl3	0.0499695	0.0437262	0.0614649	0.024649	0.296	0.24	1	0
ENSMUSG00000052087	Rgs14	0.0499931	0.0279286	0.0368694	0.003292	0.132	0.0946667	1	0
ENSMUSG00000003402	Prkcsh	0.0500821	0.0420621	0.0470799	0.00708945	0.111	0.077	1	0
ENSMUSG00002075217	ENSMUSG00002075217	0.05038	0.0313007	-0.064463	0.00661728	0.106	0.142667	1	0
ENSMUSG00000054808	Actn4	0.0504167	0.0298677	-0.0509611	0.0134366	0.137	0.180333	1	0	SFARI					2	0
ENSMUSG00000039954	Stk32a	0.0504927	0.0593812	-0.122808	0.0209832	0.507	0.562667	1	0
ENSMUSG00000024530	Prelid3a	0.0505134	0.0694923	-0.0774362	0.0184756	0.238	0.295333	1	0
ENSMUSG00000031583	Wrn	0.0507231	0.00781915	0.0458495	0.00318725	0.157	0.117667	1	0
ENSMUSG00000001855	Nup214	0.0507504	0.0324393	0.0676237	0.00951223	0.219	0.174	1	0
ENSMUSG00000004187	Kifc2	0.0509181	0.0546024	0.0770024	0.0234966	0.212	0.164333	1	0
ENSMUSG00000064068	Mtx1	0.0509231	0.0513018	0.0454452	0.0151678	0.114	0.079	1	0
ENSMUSG00000006651	Aplp1	0.0512654	0.0634517	0.0880743	0.0211218	0.49	0.419333	1	0
ENSMUSG00000069601	Ank3	0.0513044	0.0519288	0.0533386	0.0117296	1	1	1	0	SFARI;EAGLE		Moderate	7.3	Discordant	1	0
ENSMUSG00000031393	Mecp2	0.0514358	0.0678133	0.0990819	0.0339222	0.435	0.368333	1	0	SFARI					1	1
ENSMUSG00000029054	Gabrd	0.0514763	0.00203686	0.0553305	0.00792567	0.381	0.319667	1	0
ENSMUSG00000052738	Suclg1	0.0516376	0.041897	0.0863316	0.0158308	0.21	0.165333	1	0
ENSMUSG00000028149	Rap1gds1	0.0517278	0.044315	-0.112705	0.0122027	0.54	0.581	1	0
ENSMUSG00000034040	Galnt17	0.0517735	0.0393304	-0.120898	0.0186419	0.551	0.600667	1	0
ENSMUSG00000030774	Pak1	0.0517991	0.0432794	-0.0856186	0.0350747	0.121	0.164	1	0	SFARI						1
ENSMUSG00000034158	Lrrc58	0.0518612	0.0472752	0.049731	0.0128866	0.144	0.105	1	0
ENSMUSG00000038372	Gmds	0.0518963	0.0635798	-0.109354	0.0191905	0.323	0.374667	1	0
ENSMUSG00000050856	Atp5k	0.0518972	0.0389946	0.0684854	0.00924548	0.142	0.105	1	0
ENSMUSG00000048076	Arf1	0.0519073	0.067973	0.0727643	0.021786	0.184	0.138	1	0
ENSMUSG00000114797	Gm49336	0.0520585	0.0170507	0.0513045	0.00376613	0.129	0.0936667	1	0
ENSMUSG00000025138	Sirt7	0.052194	0.0409364	0.0662856	0.0102103	0.131	0.0946667	1	0
ENSMUSG00000015214	Mtmr1	0.0524264	0.0768529	0.0872576	0.0184211	0.305	0.248	1	0
ENSMUSG00000024359	Hspa9	0.0524497	0.0240543	0.0649878	0.0118341	0.265	0.217333	1	0
ENSMUSG00000059447	Hadhb	0.0525421	0.0142154	0.0451947	0.008968	0.131	0.0943333	1	0
ENSMUSG00000020402	Vdac1	0.0526928	0.024639	0.0732504	0.0116134	0.321	0.269	1	0
ENSMUSG00000026576	Atp1b1	0.0528357	0.0351872	0.124357	0.0188409	0.705	0.666333	1	0
ENSMUSG00000069520	Tmem19	0.0529555	0.0357346	0.0462407	0.0143223	0.111	0.0766667	1	0
ENSMUSG00000002341	Ncan	0.053001	0.0326181	0.0530993	0.00780684	0.134	0.098	1	0
ENSMUSG00000064145	Arih2	0.0530862	0.0393799	-0.0799158	0.0118371	0.278	0.331667	1	0
ENSMUSG00000097048	1600020E01Rik	0.0531674	0.0639072	0.0833727	0.0212287	0.174	0.131	1	0
ENSMUSG00000040760	Appl1	0.0532402	0.0170215	0.100467	0.0161634	0.386	0.336	1	0
ENSMUSG00000038976	Ppp1r9b	0.0535212	0.0150621	0.0477326	0	0.108	0.076	1	0	SFARI;EAGLE		Limited	1.5	Discordant	1	0
ENSMUSG00000024073	Birc6	0.0535798	0.0501836	-0.0982714	0.0355248	0.68	0.727	1	0	SFARI					2	0
ENSMUSG00000024873	Cnih2	0.0536424	0.0352117	0.0547732	0.00567467	0.141	0.103667	1	0
ENSMUSG00000034997	Htr2a	0.0536508	0.0654638	0.0790952	0.0148614	0.157	0.117	1	0
ENSMUSG00000032314	Etfa	0.0537042	0.0564983	0.076154	0.020558	0.161	0.121	1	0
ENSMUSG00000002280	Ciao3	0.0537333	0.0334874	0.0592277	0.00766996	0.121	0.0866667	1	0
ENSMUSG00000045962	Wnk1	0.0537914	0.0417496	-0.0940614	0.016804	0.517	0.576333	1	0
ENSMUSG00000001833	Septin7	0.0538053	0.0442818	-0.159407	0.0342356	0.349	0.388667	1	0
ENSMUSG00000010136	Pifo	0.0540114	0.0629732	0.0540745	0.0122502	0.116	0.0793333	1	0
ENSMUSG00000037236	Matr3	0.0540119	0.063636	0.0872602	0.0210015	0.523	0.471	1	0
ENSMUSG00000019518	Ap4m1	0.0541648	0.0361684	0.059666	0.00636321	0.113	0.079	1	0
ENSMUSG00000056851	Pcbp2	0.0542875	0.0125815	0.0873514	0.0117143	0.485	0.432667	1	0
ENSMUSG00000052707	Tnrc6a	0.05457	0.0424795	0.0714943	0.012148	0.363	0.304333	1	0
ENSMUSG00000031755	Bbs2	0.0546025	0.0458153	0.0602017	0.00665218	0.177	0.135667	1	0
ENSMUSG00000030232	Aebp2	0.0547564	0.0163937	0.0565176	0.0110759	0.293	0.240667	1	0
ENSMUSG00000006675	P4htm	0.0550691	0.0380106	0.0574615	0.0160021	0.205	0.160333	1	0
ENSMUSG00000011751	Sptbn4	0.0551196	0.0195796	0.104681	0.0111535	0.662	0.624667	1	0
ENSMUSG00000009575	Cbx5	0.0552421	0.0474788	0.0629863	0.0136814	0.237	0.188667	1	0
ENSMUSG00000042508	Dmtf1	0.0555558	0.0501737	0.0711572	0.0178953	0.303	0.252	1	0
ENSMUSG00000087201	Gm15261	0.0556946	0.0496156	0.0930021	0.0377993	0.24	0.19	1	0
ENSMUSG00000022540	Rogdi	0.0558333	0.0183072	0.0519478	0.00634621	0.154	0.116333	1	0
ENSMUSG00000026223	Itm2c	0.0560521	0.015718	0.0968493	0.00799734	0.435	0.384	1	0
ENSMUSG00000037331	Larp1	0.0561491	0.0296387	0.0735787	0.0045516	0.227	0.182	1	0
ENSMUSG00000055862	Izumo4	0.0561827	0.0646726	0.0656439	0.0155017	0.124	0.088	1	0
ENSMUSG00000032030	Cul5	0.0564222	0.0436682	0.0662609	0.012815	0.374	0.317667	1	0
ENSMUSG00000025468	Caly	0.0564366	0.0627854	0.0485113	0.00991745	0.308	0.249333	1	0
ENSMUSG00000060843	Ctnna3	0.0564729	0.0213791	-0.0810006	0.0115475	0.864	0.892	1	0	SFARI					2	0
ENSMUSG00000053580	Tanc2	0.0565339	0.0503532	-0.0875982	0.0221042	0.957	0.958667	1	0	SFARI;EAGLE;TADA	0.00200495	Definitive	24.95	Concordant	1	1
ENSMUSG00000034685	Fam171a2	0.0565542	0.0463093	0.0468449	0.0159274	0.118	0.0813333	1	0
ENSMUSG00000020577	Tspan13	0.0566188	0.0505852	0.0938757	0.0161426	0.321	0.274333	1	0
ENSMUSG00000030134	Rasgef1a	0.0567131	0.0194726	0.0868667	0.012712	0.732	0.689667	1	0
ENSMUSG00000025905	Oprk1	0.0569014	0.063144	0.0642729	0.00890865	0.141	0.103	1	0
ENSMUSG00000001986	Gria3	0.0569419	0.0496159	0.0861153	0.0221171	0.964	0.951667	1	0	SFARI						1
ENSMUSG00000023030	Slc11a2	0.0570256	0.0508503	0.056051	0.0184923	0.132	0.0946667	1	0
ENSMUSG00000026737	Pip4k2a	0.0570337	0.0318859	-0.0939022	0.00355038	0.24	0.285	1	0
ENSMUSG00000059811	Atl2	0.057063	0.0665852	0.114774	0.0281445	0.464	0.41	1	0
ENSMUSG00000019806	Aig1	0.0572407	0.0819392	-0.101504	0.0348393	0.366	0.42	1	0
ENSMUSG00000029348	Asphd2	0.0575414	0.0545376	0.069782	0.0161675	0.217	0.171	1	0
ENSMUSG00000063260	Syt10	0.0577514	0.0742313	0.0416226	0.0334382	0.171	0.125333	1	0
ENSMUSG00000024287	Thoc1	0.0577631	0.0180902	0.0595784	0.0112639	0.419	0.359333	1	0
ENSMUSG00000027624	Epb41l1	0.057926	0.0181676	0.0977858	0.00867407	0.627	0.598333	1	0
ENSMUSG00000030246	Ldhb	0.0579546	0.0281635	0.0685246	0.00684559	0.354	0.301333	1	0
ENSMUSG00000028496	Mllt3	0.0580565	0.0933858	-0.134219	0.0531586	0.778	0.792667	1	0
ENSMUSG00000045071	E130308A19Rik	0.0581294	0.0312957	-0.0679288	0.00781748	0.147	0.189	1	0
ENSMUSG00000067242	Lgi1	0.0581743	0.0121331	0.0998402	0.00152023	0.435	0.386333	1	0
ENSMUSG00000044024	Rell2	0.0581788	0.0457774	0.0538292	0.0116248	0.116	0.082	1	0
ENSMUSG00000058444	Map2k5	0.0581963	0.0311174	-0.0862439	0.0053419	0.28	0.326667	1	0
ENSMUSG00000032399	Rpl4	0.0583038	0.0452178	0.052797	0.0138722	0.123	0.0866667	1	0
ENSMUSG00000025198	Erlin1	0.0583364	0.0663488	0.0617016	0.00795176	0.344	0.285333	1	0
ENSMUSG00000038170	Pde4dip	0.0585479	0.0418893	-0.109361	0.00766474	0.722	0.74	1	0
ENSMUSG00000021144	Mta1	0.0585796	0.0234651	0.0400925	0.00461242	0.101	0.0703333	1	0
ENSMUSG00000041757	Plekha6	0.0586217	0.0173424	0.0719449	0.00890985	0.396	0.344667	1	0
ENSMUSG00000031386	Hcfc1	0.0588656	0.0445468	0.0522326	0.0148994	0.123	0.0873333	1	0	SFARI						1
ENSMUSG00000020646	Mboat2	0.0590568	0.0709224	0.0807318	0.0340939	0.306	0.253333	1	0
ENSMUSG00000029128	Rab28	0.0590695	0.079046	-0.101567	0.0353743	0.339	0.395333	1	0
ENSMUSG00000067629	Syngap1	0.0595334	0.0696605	0.0628269	0.0183353	0.267	0.214667	1	0	SFARI;EAGLE;TADA	0	Definitive	40.75	Concordant	1	1
ENSMUSG00000030091	Nup210	0.0595683	0.0647318	0.0406654	0.0100596	0.142	0.103333	1	0
ENSMUSG00000020728	Cep112	0.0595897	0.0217881	0.0499175	0.00504672	0.192	0.148333	1	0
ENSMUSG00000030062	Rpn1	0.0596078	0.0609757	0.0372399	0.0137679	0.121	0.085	1	0
ENSMUSG00000048895	Cdk5r1	0.0596815	0.0246501	0.0897831	0.0082024	0.197	0.158333	1	0
ENSMUSG00000063870	Chd4	0.0598617	0.0435648	0.11777	0.0143523	0.483	0.447	1	0
ENSMUSG00000020886	Dlg4	0.0599192	0.0521085	0.076587	0.0195925	0.397	0.345	1	0	SFARI;EAGLE;TADA	0.0100835	Limited	2.45	Discordant	1	0
ENSMUSG00000028152	Tspan5	0.0599542	0.088345	-0.126864	0.0523909	0.624	0.666	1	0
ENSMUSG00000057193	Slc44a2	0.0604569	0.0317337	0.0467324	0.00830943	0.116	0.0826667	1	0
ENSMUSG00000041920	Slc16a6	0.0605894	0.0619395	0.0575708	0.0101344	0.137	0.100333	1	0
ENSMUSG00000018796	Acsl1	0.060728	0.0484711	0.0548025	0.0145069	0.175	0.134667	1	0
ENSMUSG00000022498	Txndc11	0.0608558	0.0400126	0.0760255	0.0112767	0.296	0.247333	1	0
ENSMUSG00000037196	Pacrg	0.0609202	0.0295416	-0.0586396	0.0052478	0.123	0.160667	1	0
ENSMUSG00000032376	Usp3	0.0610247	0.0502501	0.101236	0.0251669	0.611	0.560333	1	0
ENSMUSG00000022884	Eif4a2	0.0611772	0.0241969	0.0974567	0.00602855	0.343	0.296333	1	0
ENSMUSG00000028410	Dnaja1	0.0613175	0.0265199	0.0567947	0.00313726	0.303	0.251667	1	0
ENSMUSG00000035863	Palm	0.0614218	0.0651541	0.072861	0.0212673	0.255	0.207	1	0
ENSMUSG00000031960	Aars	0.0615084	0.0689808	0.0690447	0.0220166	0.126	0.087	1	0
ENSMUSG00000026927	Entr1	0.0615995	0.0193725	-0.0556325	0.0149434	0.164	0.206667	1	0
ENSMUSG00000052488	Cherp	0.0616535	0.0464781	0.0525514	0.0121844	0.166	0.125667	1	0
ENSMUSG00000042750	Bex2	0.0616616	0.0794795	0.0571616	0.0148314	0.177	0.132333	1	0
ENSMUSG00000047454	Gphn	0.0617717	0.0558463	0.0708906	0.0142814	0.99	0.987333	1	0	SFARI					2	0
ENSMUSG00000070576	Mn1	0.0618537	0.0282226	0.0749471	0.008966	0.22	0.178667	1	0
ENSMUSG00000024422	Dhx16	0.0618604	0.0425184	0.0537449	0.00872653	0.134	0.0986667	1	0
ENSMUSG00000005986	Ankrd13d	0.0618702	0.0546926	0.0772217	0.0207327	0.126	0.089	1	0
ENSMUSG00000022623	Shank3	0.0621282	0.03776	0.0556743	0.0119004	0.331	0.276667	1	0	SFARI;EAGLE;TADA	0	Definitive	74.85	Concordant	1	1
ENSMUSG00000107862	Gm44151	0.0621628	0.0428286	0.0566547	0.0138576	0.162	0.123667	1	0
ENSMUSG00000044906	4930503L19Rik	0.0621634	0.0302511	0.0440754	0.00426204	0.146	0.108333	1	0
ENSMUSG00000027676	Ccdc39	0.0621673	0.0314833	0.0761186	0.00559389	0.154	0.119	1	0
ENSMUSG00000039156	Stim2	0.0622643	0.0531296	-0.0968207	0.0314461	0.267	0.315667	1	0
ENSMUSG00000009863	Sdhb	0.0622758	0.0555518	0.0622695	0.0217288	0.204	0.156667	1	0
ENSMUSG00000024661	Fth1	0.0625228	0.0679581	0.0999575	0.0293117	0.349	0.295667	1	0
ENSMUSG00000108081	Gm44026	0.0625767	0.0504512	0.0544512	0.00384139	0.101	0.07	1	0
ENSMUSG00000038034	Igsf8	0.0626249	0.0571762	0.0706847	0.0358243	0.215	0.161	1	0
ENSMUSG00000048232	Fbxo10	0.0627397	0.0353989	0.0328329	0.00885101	0.101	0.0696667	1	0
ENSMUSG00000036306	Lzts1	0.0629434	0.0252613	0.0935261	0.00950199	0.422	0.377	1	0
ENSMUSG00000022946	Dop1b	0.0630286	0.0785434	0.0761074	0.0219841	0.31	0.256667	1	0
ENSMUSG00000015882	Lcorl	0.0631342	0.0526338	-0.102797	0.028839	0.396	0.450667	1	0
ENSMUSG00000041351	Rap1gap	0.0632214	0.0333985	0.0912523	0.0154603	0.727	0.679667	1	0
ENSMUSG00000025508	Rplp2	0.0632277	0.0854284	0.0645298	0.0285292	0.172	0.129	1	0
ENSMUSG00000039318	Rab3gap2	0.0632723	0.065395	-0.11409	0.0225677	0.348	0.393333	1	0
ENSMUSG00000054942	Miga1	0.0634092	0.0395607	-0.0977176	0.00779875	0.29	0.336667	1	0
ENSMUSG00000031997	Trpc6	0.0634679	0.0701206	0.0482317	0.011878	0.134	0.0966667	1	0	SFARI;EAGLE		Moderate	7.2	Concordant	2	0
ENSMUSG00000038241	Cep250	0.0635407	0.0333321	0.0347131	0	0.108	0.0753333	1	0
ENSMUSG00000027881	Prpf38b	0.0635594	0.0195178	0.0678806	0.00933106	0.255	0.208333	1	0
ENSMUSG00000056073	Grik2	0.0639865	0.0411006	-0.0636043	0.0132195	0.998	1	1	0	SFARI					2	0
ENSMUSG00000096914	Galntl6	0.0639894	0.0703064	-0.113193	0.0644731	0.947	0.958	1	0
ENSMUSG00000044894	Uqcrq	0.0641596	0.0615036	0.0620329	0.0219192	0.162	0.122	1	0
ENSMUSG00000024855	Pacs1	0.0643076	0.0233126	0.0942652	0.0120361	0.477	0.431	1	0	SFARI;EAGLE		Limited	1.35	Discordant	1	1
ENSMUSG00000002455	Prpf6	0.064641	0.05697	0.0711362	0.0216855	0.253	0.202	1	0
ENSMUSG00000055214	Pld5	0.0647968	0.0396515	-0.0951956	0.0146795	0.338	0.387	1	0
ENSMUSG00000106864	Gtf3c2	0.0648867	0.0649994	0.0537613	0.0210995	0.152	0.111	1	0
ENSMUSG00000032115	Hyou1	0.0648915	0.041435	0.0380149	0.0109774	0.103	0.0716667	1	0
ENSMUSG00000015165	Hnrnpl	0.06505	0.103933	0.0721804	0.0366295	0.361	0.297	1	0
ENSMUSG00000040661	Rad54l2	0.0650871	0.0398741	0.072195	0.0074958	0.214	0.171333	1	0
ENSMUSG00000011752	Pgam1	0.0651698	0.104136	0.0698437	0.018551	0.126	0.0856667	1	0
ENSMUSG00000031166	Wdr13	0.0652457	0.111504	0.0965663	0.0496021	0.21	0.147667	0.889187	0.191934
ENSMUSG00000009013	Dynll1	0.0655145	0.0314299	0.0734997	0.0101039	0.227	0.185	1	0
ENSMUSG00000044477	Zfand3	0.0656532	0.0898916	-0.102818	0.0281031	0.498	0.544	1	0
ENSMUSG00000057551	Zfp317	0.0657465	0.0309725	0.0426657	0.00553819	0.109	0.078	1	0
ENSMUSG00000029364	Wsb2	0.0658182	0.0642836	0.0567918	0.0076238	0.131	0.0953333	1	0
ENSMUSG00000033712	Ccar2	0.0658792	0.0591903	0.0637494	0.0101344	0.141	0.105	1	0
ENSMUSG00000090086	AI480526	0.0661533	0.0811357	0.0731276	0.0166553	0.174	0.133	1	0
ENSMUSG00000031608	Galnt7	0.0662875	0.0131276	-0.0968742	0.00671343	0.276	0.317667	1	0
ENSMUSG00000030872	Gga2	0.0663723	0.0733557	0.0649665	0.012767	0.156	0.116333	1	0
ENSMUSG00000020647	Ncoa1	0.0664933	0.0279397	0.0766948	0.00792025	0.647	0.605667	1	0	SFARI;EAGLE		Limited	3	Discordant	1	0
ENSMUSG00000020580	Rock2	0.0667954	0.0964415	-0.114197	0.0396769	0.69	0.726	1	0
ENSMUSG00000029419	Ajm1	0.067068	0.0632976	0.0458916	0.00969814	0.147	0.109667	1	0
ENSMUSG00000020309	Chac2	0.0672291	0.0373004	0.059901	0.0142969	0.114	0.0826667	1	0
ENSMUSG00000079036	Alkbh1	0.0673117	0.0924192	-0.0614634	0.0243493	0.132	0.179	1	0
ENSMUSG00000029407	Uso1	0.0673255	0.0961431	-0.0691628	0.0417251	0.194	0.247333	1	0
ENSMUSG00000058704	Memo1	0.0674284	0.0353059	0.0640098	0.013796	0.376	0.321333	1	0	SFARI					2	0
ENSMUSG00000022285	Ywhaz	0.0675849	0.0413231	0.102136	0.0170678	0.575	0.530333	1	0	SFARI					3	0
ENSMUSG00000006304	Arpc2	0.0676885	0.0670218	0.0723633	0.0323264	0.391	0.334	1	0
ENSMUSG00000020859	Spag9	0.0679032	0.0132703	-0.0951988	0.0110592	0.656	0.676	1	0
ENSMUSG00000044813	Shb	0.0680776	0.0539704	0.0732291	0.0226897	0.258	0.210667	1	0
ENSMUSG00000043872	Zmym1	0.0681967	0.0775245	0.0611474	0.0221848	0.118	0.0806667	1	0
ENSMUSG00000000881	Dlg3	0.0684459	0.0937688	0.0787176	0.0305573	0.204	0.156333	1	0
ENSMUSG00000033632	AW554918	0.0685148	0.0526267	-0.0705543	0.0172584	0.235	0.282	1	0
ENSMUSG00000036902	Neto2	0.0686074	0.0750058	-0.0853773	0.0343706	0.76	0.782333	1	0
ENSMUSG00000021033	Gstz1	0.0688469	0.0611446	0.0558956	0.0174281	0.118	0.0833333	1	0
ENSMUSG00000059173	Pde1a	0.0689138	0.0732043	0.212786	0.062645	0.192	0.150333	1	0
ENSMUSG00000037795	N4bp2	0.0690432	0.0400364	0.0433352	0.00581295	0.108	0.077	1	0
ENSMUSG00000074657	Kif5a	0.0692951	0.0626645	0.0712356	0.0114703	0.252	0.208333	1	0
ENSMUSG00000023883	Phf10	0.069304	0.103692	0.0705806	0.0192755	0.111	0.0753333	1	0
ENSMUSG00000024892	Pcx	0.0693394	0.0537114	0.0519946	0.0103245	0.157	0.118667	1	0	SFARI					3	0
ENSMUSG00000046432	Bex3	0.0696274	0.0634948	0.05636	0.00976155	0.146	0.108667	1	0
ENSMUSG00000025006	Sorbs1	0.0696934	0.109803	-0.107716	0.0435298	0.856	0.856333	1	0
ENSMUSG00000062519	Zfp398	0.0697802	0.0527817	0.0406193	0.0201181	0.159	0.12	1	0
ENSMUSG00000090015	Gm15446	0.0698188	0.020539	0.0567292	0.00457031	0.114	0.084	1	0
ENSMUSG00000055681	Cope	0.0698863	0.0602681	0.0536081	0.0163461	0.109	0.0746667	1	0
ENSMUSG00000032621	Srek1	0.0702308	0.0551386	-0.0802765	0.0234711	0.679	0.714333	1	0
ENSMUSG00000013593	Ndufs2	0.0702426	0.0760952	0.056775	0.0107186	0.141	0.103667	1	0
ENSMUSG00000063600	Egfem1	0.0704537	0.104902	-0.140826	0.0470998	0.583	0.621333	1	0
ENSMUSG00000026790	Odf2	0.0711078	0.104415	0.0799728	0.0278062	0.442	0.379333	1	0
ENSMUSG00000021288	Klc1	0.0711627	0.076556	0.0741762	0.02538	0.396	0.335333	1	0
ENSMUSG00000020889	Nr1d1	0.0714596	0.0782348	0.0588643	0.0160648	0.108	0.0736667	1	0	SFARI					2	0
ENSMUSG00000024535	Snx24	0.0716751	0.0714503	0.0613061	0.0266037	0.172	0.129667	1	0
ENSMUSG00000020132	Rab21	0.0718835	0.0528313	0.0533437	0.0099676	0.123	0.09	1	0
ENSMUSG00000031812	Map1lc3b	0.0719532	0.029975	0.0438701	0.00551429	0.114	0.0826667	1	0
ENSMUSG00000037110	Ralgapa2	0.0719746	0.0822629	-0.0689984	0.033814	0.563	0.636333	1	0
ENSMUSG00000023960	Enpp5	0.0720801	0.0415415	0.0656378	0.00575503	0.272	0.225667	1	0
ENSMUSG00000011306	Sugp1	0.0721164	0.109664	0.0643254	0.0240751	0.171	0.127	1	0
ENSMUSG00000005034	Prkacb	0.0721943	0.0314836	-0.0688122	0.00816979	0.452	0.506	1	0
ENSMUSG00000055761	Nkain3	0.072224	0.0528122	0.13156	0.0212022	0.697	0.638	1	0
ENSMUSG00000021038	Vipas39	0.0726051	0.061597	0.0707054	0.0229203	0.192	0.149667	1	0
ENSMUSG00000017404	Rpl19	0.0726562	0.0602157	0.0805927	0.0281386	0.19	0.148333	1	0
ENSMUSG00000029207	Apbb2	0.0727307	0.0615168	-0.107006	0.0158184	0.402	0.436	1	0
ENSMUSG00000069045	Ddx3y	0.0728111	0.0559157	0.0720867	0.0180796	0.253	0.207667	1	0
ENSMUSG00000006134	Crkl	0.0728451	0.0590058	0.0436689	0.00768873	0.104	0.073	1	0
ENSMUSG00000036667	Tcaf1	0.072903	0.0598398	-0.109054	0.0225671	0.591	0.627	1	0
ENSMUSG00000047495	Dlgap2	0.0730356	0.0707936	-0.0710818	0.0176703	0.992	0.994	1	0	SFARI;EAGLE		Limited	2.8	Discordant	2	0
ENSMUSG00000057914	Cacnb2	0.0731425	0.0601784	-0.0746964	0.0050094	0.997	0.999	1	0	SFARI					2	0
ENSMUSG00000027806	Tsc22d2	0.0737119	0.0572472	0.0655395	0.0218597	0.293	0.244333	1	0
ENSMUSG00000028556	Dock7	0.074198	0.106154	-0.11512	0.0393255	0.452	0.501	1	0
ENSMUSG00000003119	Cdk12	0.0743891	0.0536185	0.0733575	0.0222302	0.401	0.348667	1	0
ENSMUSG00000038658	Ric1	0.0745002	0.0555085	0.0435569	0.0109225	0.381	0.322	1	0
ENSMUSG00000114150	Gm46367	0.074659	0.0380216	-0.0581856	0.0042246	0.081	0.111	1	0
ENSMUSG00000060275	Nrg2	0.0747864	0.0928565	0.070662	0.0192265	0.732	0.688	1	0
ENSMUSG00000020528	Prpsap2	0.074823	0.0752223	0.0427651	0.0149647	0.146	0.108333	1	0
ENSMUSG00000024897	Apba1	0.0750782	0.0381851	-0.0468722	0.00368977	0.184	0.226667	1	0
ENSMUSG00000029602	Rasal1	0.0750905	0.102288	0.0771308	0.0153521	0.104	0.0713333	1	0
ENSMUSG00000092083	Kcnb2	0.0752114	0.078804	-0.1457	0.0226381	0.454	0.485	1	0
ENSMUSG00000111971	Gm48678	0.0753256	0.0163346	-0.0698126	0.0127039	0.358	0.407333	1	0
ENSMUSG00000061411	Nol4l	0.0754459	0.116563	0.0878712	0.0177592	0.142	0.102	1	0
ENSMUSG00000041629	Fam104a	0.0754715	0.0691498	0.0541256	0.0263718	0.132	0.092	1	0
ENSMUSG00000037458	Azin1	0.0759557	0.0514242	0.0581744	0.018606	0.228	0.184333	1	0
ENSMUSG00000021646	Mccc2	0.0761676	0.0674313	0.0797247	0.0168008	0.161	0.122667	1	0
ENSMUSG00000026610	Esrrg	0.0762501	0.0269714	-0.074228	0.0120027	0.54	0.592	1	0
ENSMUSG00000063800	Prpf38a	0.0765343	0.0916029	0.0331085	0.0157253	0.118	0.0826667	1	0
ENSMUSG00000020936	Nmt1	0.0766685	0.0900506	0.0651006	0.0295673	0.298	0.249333	1	0
ENSMUSG00000021814	Anxa7	0.0767276	0.0338322	0.0406536	0.00708945	0.101	0.072	1	0
ENSMUSG00000074582	Arfgef2	0.0768256	0.0606938	0.0695585	0.0282942	0.238	0.192667	1	0
ENSMUSG00000025980	Hspd1	0.0769364	0.0465948	0.070304	0.00872653	0.127	0.096	1	0
ENSMUSG00000057649	Brd9	0.0771251	0.0449508	0.0644806	0.0197614	0.306	0.258333	1	0
ENSMUSG00000063972	Nr6a1	0.0771546	0.104433	-0.108052	0.0207382	0.407	0.454	1	0
ENSMUSG00000027953	Slc50a1	0.0771981	0.0415165	0.0361804	0.00335646	0.111	0.08	1	0
ENSMUSG00000021676	Iqgap2	0.0772135	0.0144529	0.0808441	0.0176104	0.434	0.385667	1	0
ENSMUSG00000026812	Tsc1	0.077231	0.0576246	0.106421	0.0100879	0.31	0.271	1	0	SFARI;EAGLE;TADA	0.0737737	Definitive	17.1	Concordant	1	1
ENSMUSG00000029501	Ankle2	0.0773361	0.06872	0.0681381	0.013417	0.166	0.129	1	0
ENSMUSG00000066151	Fkbp15	0.0774677	0.070987	0.0462545	0.0148302	0.142	0.104333	1	0
ENSMUSG00000028524	Sgip1	0.0776294	0.0787777	-0.0578687	0.0279763	0.877	0.893	1	0
ENSMUSG00000047909	Ankrd16	0.0778819	0.0754539	0.0507543	0.0109883	0.123	0.0893333	1	0
ENSMUSG00000026565	Pou2f1	0.0778934	0.0999958	0.0948428	0.0315439	0.427	0.373	1	0
ENSMUSG00000019792	Trmt11	0.0779679	0.0580363	-0.0584082	0.0160335	0.114	0.149333	1	0
ENSMUSG00000000223	Drp2	0.0780656	0.0744185	0.050721	0.0147045	0.232	0.186333	1	0
ENSMUSG00000020986	Sec23a	0.07834	0.0319385	0.0528924	0.00839796	0.195	0.157	1	0
ENSMUSG00000040118	Cacna2d1	0.0783629	0.0567119	-0.0923743	0.00414569	0.854	0.885	1	0	SFARI					2	0
ENSMUSG00000032420	Nt5e	0.0784469	0.0796142	0.0464369	0.0150399	0.197	0.154667	1	0
ENSMUSG00000024276	Zfp397	0.0786614	0.0978378	-0.0480561	0.0106655	0.083	0.117	1	0
ENSMUSG00000110246	C130073E24Rik	0.0790292	0.0788645	0.130917	0.0378713	0.215	0.173667	1	0
ENSMUSG00000060923	Acyp2	0.0791315	0.0478965	-0.0914799	0.0065477	0.371	0.418	1	0
ENSMUSG00000025035	Arl3	0.0791392	0.0382418	0.0674918	0.00990509	0.308	0.262	1	0
ENSMUSG00000005510	Ndufs3	0.0791496	0.106843	0.0681348	0.0185011	0.275	0.224667	1	0	EAGLE		No scorable evidence	0	Concordant
ENSMUSG00000029462	Vps29	0.0793263	0.00780359	0.0625233	0.00544789	0.182	0.145667	1	0
ENSMUSG00000028252	Ccnc	0.0794851	0.108984	0.0715581	0.0307559	0.21	0.166333	1	0
ENSMUSG00000059439	Bcas3	0.0795073	0.0518915	-0.0733882	0.0234354	0.601	0.646	1	0
ENSMUSG00000040359	Ufl1	0.0796536	0.0327098	0.0614052	0.00448421	0.24	0.198667	1	0
ENSMUSG00000041126	H2az2	0.079737	0.0435506	-0.0504887	0.00682849	0.079	0.109	1	0
ENSMUSG00000024966	Stip1	0.0797704	0.0412639	0.0474859	0.00872653	0.119	0.0876667	1	0
ENSMUSG00000029121	Crmp1	0.0799725	0.0934407	0.0840029	0.0276117	0.267	0.223	1	0
ENSMUSG00000025047	Pdcd11	0.0800328	0.0490245	0.0386241	0.00777591	0.101	0.0716667	1	0
ENSMUSG00000003062	Stard3nl	0.0800686	0.0770804	0.0401387	0.00992777	0.154	0.116667	1	0
ENSMUSG00000019920	Lims1	0.0803843	0.0210379	-0.0495094	0.0216963	0.151	0.189333	1	0
ENSMUSG00000028248	Pnisr	0.0805541	0.119093	0.104339	0.0301071	0.76	0.727667	1	0
ENSMUSG00000023087	Noct	0.080556	0.0326659	0.0530802	0.00904599	0.169	0.132333	1	0
ENSMUSG00000037936	Scarb1	0.0805839	0.0437573	0.0632248	0.00665935	0.121	0.0903333	1	0
ENSMUSG00000025223	Ldb1	0.0808007	0.0481451	0.0455388	0.0111375	0.126	0.0933333	1	0	SFARI;EAGLE;TADA	0.0826832	Limited	4	Discordant	1	0
ENSMUSG00000030276	Ttll3	0.0808396	0.0737386	0.0487904	0.0111689	0.103	0.0723333	1	0
ENSMUSG00000060671	Atp8b2	0.0809446	0.0711459	0.0548936	0.0164752	0.18	0.141333	1	0
ENSMUSG00000030199	Etv6	0.0809925	0.0840813	-0.0916239	0.0125257	0.192	0.231667	1	0
ENSMUSG00000045658	Pid1	0.0812157	0.0995384	0.0529366	0.0355647	0.245	0.192	1	0
ENSMUSG00000071341	Egr4	0.0812202	0.0550975	0.0782203	0.0131733	0.162	0.125667	1	0
ENSMUSG00000037926	Ssh2	0.0816736	0.0472551	-0.063461	0.0212018	0.589	0.643667	1	0
ENSMUSG00000017631	Abr	0.0816957	0.122961	0.0774399	0.0240755	0.26	0.208667	1	0
ENSMUSG00000026123	Plekhb2	0.0817102	0.0900089	0.0582839	0.0202016	0.116	0.0806667	1	0
ENSMUSG00000021258	Ccnk	0.0817246	0.0512584	0.0505049	0.0107027	0.142	0.108667	1	0	SFARI						1
ENSMUSG00000036779	Tent4b	0.0817913	0.0841978	0.0833921	0.0174381	0.242	0.199667	1	0
ENSMUSG00000021360	Gcnt2	0.0818824	0.0543083	-0.0552938	0.00507112	0.276	0.325	1	0
ENSMUSG00000021493	Pdlim7	0.0818866	0.119502	0.075722	0.024306	0.202	0.154667	1	0
ENSMUSG00000027673	Ndufb5	0.0818988	0.0738763	0.0495654	0.031318	0.134	0.094	1	0
ENSMUSG00000042320	Prox2	0.0821348	0.0773889	-0.050852	0.0148333	0.084	0.116667	1	0
ENSMUSG00000034252	Senp6	0.0824895	0.079217	0.0936586	0.0144278	0.46	0.414	1	0
ENSMUSG00000027951	Adar	0.0826538	0.0181868	0.0658594	0.00696184	0.374	0.327333	1	0
ENSMUSG00000025968	Ndufs1	0.082665	0.0862857	0.0824162	0.01492	0.331	0.286	1	0
ENSMUSG00000032968	Inha	0.0826998	0.022191	0.0474709	0.00330186	0.127	0.0963333	1	0
ENSMUSG00000020919	Stat5b	0.082837	0.0591977	0.0777867	0.015488	0.243	0.201	1	0
ENSMUSG00000019302	Atp6v0a1	0.0831142	0.0108063	0.087926	0.00118484	0.714	0.686	1	0
ENSMUSG00000109754	Gm39214	0.0835229	0.0385236	0.0379856	0.0107807	0.146	0.110333	1	0
ENSMUSG00000069565	Dazap1	0.0835541	0.0807351	0.0523394	0.0176822	0.159	0.118667	1	0
ENSMUSG00000025616	Usp16	0.0836851	0.143079	0.0842391	0.0416211	0.272	0.208	1	0
ENSMUSG00000033862	Cdk10	0.0839428	0.0563113	-0.0499009	0.0178493	0.088	0.119667	1	0
ENSMUSG00000025781	Atp5c1	0.0840556	0.0262988	0.0538097	0.0101758	0.316	0.271	1	0
ENSMUSG00000061207	Stk19	0.0843329	0.102967	0.0482765	0.0192532	0.23	0.182333	1	0
ENSMUSG00000032875	Arhgef17	0.0845358	0.020016	0.0634265	0.00224512	0.233	0.193667	1	0
ENSMUSG00000112730	4930567K20Rik	0.0847416	0.124882	0.0791197	0.0368483	0.197	0.149667	1	0
ENSMUSG00000016179	Camk1g	0.0847626	0.116955	0.0529143	0.0104449	0.104	0.072	1	0
ENSMUSG00000026131	Dst	0.0849071	0.0155936	0.0847266	0.0067383	0.806	0.770667	1	0	SFARI					2	0
ENSMUSG00000036241	Ube2r2	0.0849104	0.1167	0.0611577	0.0274354	0.374	0.311667	1	0
ENSMUSG00000045128	Rpl18a	0.0849555	0.114195	0.0549877	0.0154549	0.119	0.085	1	0
ENSMUSG00000042328	Hps4	0.0850689	0.0802069	0.0627322	0.0153507	0.19	0.149667	1	0
ENSMUSG00000038481	Cdk19	0.0851113	0.0272359	-0.109441	0.0184655	0.346	0.383	1	0	SFARI					3	1
ENSMUSG00000028789	Azin2	0.0853614	0.0170714	0.0469168	0.00246432	0.139	0.106667	1	0
ENSMUSG00000021733	Slc4a7	0.0855596	0.0742894	0.058763	0.0178235	0.243	0.194333	1	0
ENSMUSG00000029780	Nt5c3	0.0856046	0.0830809	0.0398706	0.0173539	0.131	0.095	1	0
ENSMUSG00000054455	Vapb	0.0858979	0.0451543	0.0403546	0.00532816	0.149	0.114	1	0
ENSMUSG00000017288	Vps53	0.0861353	0.0735867	0.0580709	0.0129487	0.199	0.16	1	0
ENSMUSG00000062006	Rpl34	0.0861382	0.0162706	0.0379211	0.00125537	0.116	0.086	1	0	EAGLE		No scorable evidence	0	Concordant
ENSMUSG00000027346	Gpcpd1	0.0867363	0.10376	0.0875219	0.0251042	0.469	0.422333	1	0
ENSMUSG00000075415	Fnbp1	0.0868444	0.138251	-0.0804707	0.0484974	0.18	0.235333	1	0
ENSMUSG00000022450	Ndufa6	0.0869347	0.0494098	0.0468001	0.00770495	0.109	0.0796667	1	0
ENSMUSG00000058240	Cryzl1	0.0871201	0.0702329	0.0324947	0.0107411	0.154	0.116667	1	0
ENSMUSG00000015944	Castor2	0.0871571	0.0269874	0.0429693	0.00495799	0.136	0.103333	1	0
ENSMUSG00000020547	Bzw2	0.0873107	0.113799	0.0812658	0.0173663	0.268	0.224	1	0
ENSMUSG00000026019	Wdr12	0.0873387	0.0311047	0.0465093	0.00122222	0.149	0.115333	1	0
ENSMUSG00000030754	Copb1	0.0874017	0.0660597	0.0561533	0.0163399	0.2	0.158667	1	0
ENSMUSG00000030123	Plxnd1	0.0876578	0.0668511	0.0544994	0.0149398	0.139	0.106	1	0
ENSMUSG00000066735	Vkorc1l1	0.0879374	0.070159	0.0456044	0.0057247	0.209	0.168	1	0
ENSMUSG00000052040	Klf13	0.088053	0.0996501	0.0538606	0.0127982	0.152	0.116	1	0
ENSMUSG00000060568	Fam78b	0.0881042	0.137081	-0.0748418	0.0271258	0.192	0.242	1	0
ENSMUSG00000043336	Filip1l	0.0881285	0.0633267	0.0572898	0.00754773	0.27	0.224	1	0
ENSMUSG00000027552	E2f5	0.0881787	0.0437389	0.0457923	0.00701782	0.119	0.0886667	1	0
ENSMUSG00000045215	Asxl3	0.0881917	0.12631	-0.0581712	0.0293621	0.081	0.118667	1	0	SFARI;EAGLE;TADA	6.7e-11	Definitive	28.85	Concordant	1	1
ENSMUSG00000112437	Gm35188	0.0882455	0.0235747	0.0510386	0.0135266	0.296	0.247667	1	0
ENSMUSG00000006373	Pgrmc1	0.0884724	0.0987796	0.0477828	0.01931	0.137	0.101667	1	0
ENSMUSG00000001175	Calm1	0.0884852	0.0396252	0.0787997	0.0140588	0.603	0.560667	1	0
ENSMUSG00000032120	C2cd2l	0.0885127	0.0599824	0.061212	0.0140738	0.276	0.231667	1	0
ENSMUSG00000060534	Dcc	0.0886387	0.0612705	-0.0569499	0.0119973	0.995	0.992667	1	0	SFARI					2	0
ENSMUSG00000031109	Enox2	0.08872	0.0254738	-0.0625652	0.0129728	0.127	0.162333	1	0
ENSMUSG00000020389	Cdkl3	0.0888043	0.0380152	-0.0235326	0.00475288	0.108	0.140333	1	0
ENSMUSG00000025262	Fam120c	0.0888816	0.0163485	0.0894695	0.0106038	0.425	0.385667	1	0
ENSMUSG00000039456	Morc3	0.0888992	0.0531049	0.0461353	0.0168422	0.139	0.106667	1	0
ENSMUSG00000028692	Akr1a1	0.0889505	0.0623298	0.0464411	0.0129817	0.106	0.076	1	0
ENSMUSG00000025733	Rhot2	0.0890071	0.0407751	0.0367177	0.00753493	0.132	0.100333	1	0
ENSMUSG00000031729	Ist1	0.0890553	0.0673952	0.0431844	0.0181674	0.192	0.151333	1	0
ENSMUSG00000043635	Adamts3	0.0891476	0.0774556	-0.110233	0.0217973	0.808	0.832333	1	0
ENSMUSG00000026229	Psmd1	0.0894098	0.0456935	0.0747347	0.0136736	0.257	0.214333	1	0
ENSMUSG00000042303	Sgsm3	0.0895488	0.0644457	0.0601506	0.0137387	0.172	0.135333	1	0	SFARI					2	0
ENSMUSG00000117604	Gm33228	0.0896745	0.0266691	0.0705934	0.0048147	0.134	0.103333	1	0
ENSMUSG00000056211	R3hdm1	0.0898467	0.0889759	-0.100093	0.0299952	0.98	0.982333	1	0
ENSMUSG00000037674	Rfx7	0.0899262	0.0870135	0.0719936	0.0321586	0.659	0.623667	1	0	SFARI					3	1
ENSMUSG00000030303	Far2	0.089999	0.0553702	-0.0772128	0.00538066	0.232	0.272	1	0
ENSMUSG00000035027	Map2k2	0.0900678	0.0646688	0.0557202	0.0135179	0.167	0.130667	1	0
ENSMUSG00000041488	Stx3	0.0902102	0.046533	0.0519388	0.0135766	0.164	0.128333	1	0
ENSMUSG00000024982	Zdhhc6	0.0904677	0.0879531	0.0466638	0.0148291	0.101	0.0706667	1	0
ENSMUSG00000061950	Ppp4r1	0.0906125	0.0596071	0.0808517	0.00788088	0.228	0.191	1	0
ENSMUSG00000038174	Fam126b	0.090617	0.115272	0.083634	0.0271949	0.52	0.469667	1	0
ENSMUSG00000030216	Wbp11	0.0906306	0.0332193	0.0469263	0.00687223	0.142	0.11	1	0
ENSMUSG00000025326	Ube3a	0.0906597	0.066682	0.0894847	0.0258196	0.839	0.782667	1	0	SFARI					1	1
ENSMUSG00000021918	Nek4	0.0908479	0.0886453	0.0457372	0.0220201	0.139	0.102333	1	0
ENSMUSG00000039782	Cpeb2	0.0912167	0.108307	0.0737352	0.0186493	0.401	0.344333	1	0
ENSMUSG00000113216	Gm40841	0.0913127	0.0732882	-0.0730903	0.0211763	0.219	0.262667	1	0
ENSMUSG00000022474	Pmm1	0.0916441	0.074434	0.0392462	0.0180965	0.108	0.0763333	1	0
ENSMUSG00000028127	Abcd3	0.0916628	0.108197	0.101103	0.0362412	0.255	0.207	1	0
ENSMUSG00000026219	Trip12	0.0918553	0.059166	0.082793	0.0193113	0.685	0.629	1	0	SFARI;EAGLE;TADA	0.00367138	Definitive	27	Concordant	1	1
ENSMUSG00000042216	Sgsm1	0.0920046	0.0191106	-0.0538996	0.00980728	0.227	0.268333	1	0
ENSMUSG00000029108	Pcdh7	0.092037	0.0597384	-0.100792	0.0102837	0.806	0.853333	1	0
ENSMUSG00000042523	Dnal1	0.0921841	0.0469859	0.0509189	0.00548931	0.169	0.133333	1	0
ENSMUSG00000043962	Thrap3	0.0922196	0.0642056	0.0521862	0.0148599	0.391	0.334667	1	0
ENSMUSG00000053141	Ptprt	0.0923962	0.0472354	-0.0863743	0.0099498	0.331	0.378667	1	0	SFARI					2	0
ENSMUSG00000025375	Aatk	0.0924862	0.0792713	0.0588833	0.0177047	0.174	0.134333	1	0
ENSMUSG00000056579	Tug1	0.0925713	0.0831905	0.0461292	0.0119026	0.132	0.0993333	1	0
ENSMUSG00000093904	Tomm20	0.0926135	0.0333439	0.0613429	0.00945316	0.273	0.23	1	0
ENSMUSG00000036403	Cep135	0.0927209	0.0714984	0.0525994	0.0116438	0.142	0.108667	1	0	SFARI					2	0
ENSMUSG00000022601	Zbtb11	0.0931466	0.109368	0.0922559	0.0264662	0.331	0.284667	1	0
ENSMUSG00000022437	Samm50	0.0933832	0.0847473	0.056607	0.0149448	0.119	0.0866667	1	0
ENSMUSG00000026313	Hdac4	0.093649	0.12132	-0.0817542	0.0396207	0.217	0.271333	1	0	SFARI					2	1
ENSMUSG00000025812	Pard3	0.093682	0.123255	-0.0828443	0.0311667	0.901	0.915667	1	0
ENSMUSG00000022812	Gsk3b	0.0937036	0.0408037	-0.0788604	0.0119386	0.753	0.775667	1	0
ENSMUSG00000021936	Mapk8	0.0937848	0.110864	0.0447937	0.0294969	0.384	0.321333	1	0
ENSMUSG00000032186	Tmod2	0.093803	0.119233	-0.0898024	0.0180796	0.325	0.368	1	0
ENSMUSG00000038482	Tfdp1	0.0939724	0.139971	0.0892866	0.0247425	0.197	0.156	1	0
ENSMUSG00000032261	Sh3bgrl2	0.094036	0.0476667	0.0546288	0.00889495	0.108	0.0796667	1	0
ENSMUSG00000032518	Rpsa	0.0941136	0.0523169	0.0550478	0.0052967	0.195	0.157333	1	0
ENSMUSG00000021972	Hmbox1	0.0941193	0.0983146	0.0734985	0.0236266	0.495	0.437667	1	0
ENSMUSG00000042444	Mindy2	0.0944029	0.107006	0.0663261	0.021363	0.192	0.151333	1	0
ENSMUSG00000027506	Tpd52	0.0945325	0.04966	-0.0481064	0.0170327	0.137	0.173333	1	0
ENSMUSG00000059456	Ptk2b	0.0945496	0.082822	0.0721764	0.0287196	0.68	0.617	1	0
ENSMUSG00000110185	Igip	0.09461	0.123911	0.0615409	0.0145503	0.118	0.0853333	1	0
ENSMUSG00000034912	Mdga2	0.0946515	0.0336869	0.0641461	0.0114853	1	1	1	0	SFARI					2	0
ENSMUSG00000028226	Mmp16	0.0948579	0.0592858	-0.125192	0.0134887	0.76	0.751667	1	0
ENSMUSG00000043671	Dpy19l3	0.0951584	0.0288882	0.064893	0.0153169	0.361	0.318	1	0
ENSMUSG00000015599	Ttbk1	0.0951836	0.018126	0.0333838	0.00448989	0.127	0.0966667	1	0
ENSMUSG00000036273	Lrrk2	0.0952807	0.0587903	-0.0905715	0.0261364	0.796	0.823	1	0
ENSMUSG00000038485	Socs7	0.0953639	0.125411	0.0567779	0.027096	0.275	0.226	1	0
ENSMUSG00000074794	Arrdc3	0.0954114	0.0550635	-0.060799	0.00994983	0.084	0.112667	1	0
ENSMUSG00000033237	Arid2	0.0954768	0.0472723	-0.078099	0.00100536	0.245	0.282	1	0	SFARI					2	1
ENSMUSG00000086387	Gm15563	0.0958409	0.0445393	0.0498142	0.00318265	0.156	0.122667	1	0
ENSMUSG00000029071	Dvl1	0.0958505	0.0791647	0.055776	0.0123908	0.179	0.141667	1	0
ENSMUSG00000022099	Dmtn	0.0958577	0.00537677	0.0603087	0.00879216	0.373	0.325	1	0
ENSMUSG00000069495	Epc2	0.0961344	0.0459052	-0.0690821	0.0155192	0.295	0.342333	1	0	SFARI					2	0
ENSMUSG00000038530	Rgs4	0.0961828	0.084583	0.143788	0.0292863	0.268	0.230667	1	0
ENSMUSG00000115337	4930570B17Rik	0.0963063	0.0946155	0.0534797	0.0186137	0.123	0.0893333	1	0
ENSMUSG00000085169	Gm10785	0.0963554	0.0736842	0.0625945	0.00839796	0.197	0.16	1	0
ENSMUSG00000001942	Siae	0.0966298	0.145172	0.0466436	0.0169302	0.116	0.0813333	1	0
ENSMUSG00000003814	Calr	0.0967735	0.067395	0.0904558	0.0127599	0.296	0.260667	1	0
ENSMUSG00000021870	Slmap	0.0967914	0.0860422	-0.0977203	0.0163377	0.664	0.721667	1	0
ENSMUSG00000015829	Tnr	0.0972766	0.0484711	0.0713355	0.0129189	0.667	0.611333	1	0
ENSMUSG00000017291	Taok1	0.097844	0.0707627	-0.0818732	0.0197729	0.508	0.555333	1	0	SFARI;EAGLE;TADA	2.46e-06	Moderate	8.25	Discordant	1	1
ENSMUSG00000008153	Clstn3	0.0980952	0.088176	0.08328	0.0207228	0.283	0.243333	1	0
ENSMUSG00000029062	Cdk11b	0.0984087	0.0440911	0.049536	0.00478703	0.171	0.136	1	0
ENSMUSG00000031095	Cul4b	0.098514	0.0538009	0.0388336	0.0078732	0.114	0.085	1	0
ENSMUSG00000051067	Lingo3	0.0986441	0.082283	0.0501436	0.0218658	0.22	0.178333	1	0
ENSMUSG00000047261	Gap43	0.0989567	0.105798	-0.0913909	0.0154233	0.368	0.417333	1	0
ENSMUSG00000025373	Rnf41	0.0991866	0.0789323	0.0443547	0.010723	0.116	0.0863333	1	0
ENSMUSG00000023944	Hsp90ab1	0.0992449	0.109278	0.107467	0.040253	0.578	0.52	1	0
ENSMUSG00000025579	Gaa	0.0995459	0.0673118	0.0680378	0.0133948	0.205	0.168333	1	0
ENSMUSG00000067713	Prkag1	0.0995618	0.0810837	0.0518831	0.00662645	0.127	0.0963333	1	0
ENSMUSG00000045100	Slc25a26	0.0995625	0.0737251	0.0510748	0.0198078	0.227	0.185333	1	0
ENSMUSG00000032507	Fbxl2	0.0996316	0.0567615	0.0654554	0.0162662	0.348	0.299667	1	0
ENSMUSG00000033629	Hacd3	0.0996473	0.0556188	0.036695	0.0171001	0.339	0.287333	1	0
ENSMUSG00000029439	Sfswap	0.0999392	0.0603003	-0.082611	0.0103622	0.233	0.270333	1	0
ENSMUSG00000056201	Cfl1	0.100125	0.163843	0.0805159	0.0305485	0.197	0.15	1	0
ENSMUSG00000030983	Bccip	0.100184	0.0519341	0.0513111	0.00652808	0.121	0.0916667	1	0
ENSMUSG00000039262	Prrc2b	0.100394	0.0163682	0.072015	0.00812755	0.44	0.396333	1	0
ENSMUSG00000036510	Cdh8	0.100416	0.0421764	-0.087594	0.00977611	0.904	0.93	1	0	SFARI					2	0
ENSMUSG00000028329	Xpa	0.100461	0.0104738	-0.0303726	0.00214687	0.075	0.101667	1	0
ENSMUSG00000045039	Megf8	0.100548	0.0712833	0.038782	0.0139395	0.136	0.103333	1	0
ENSMUSG00000030265	Kras	0.100811	0.120914	0.0516818	0.0223385	0.172	0.133667	1	0
ENSMUSG00000036356	Csgalnact1	0.101013	0.0630022	0.0562767	0.0235511	0.139	0.106	1	0
ENSMUSG00000040537	Adam22	0.101082	0.0864424	-0.0881472	0.0165624	0.722	0.741	1	0
ENSMUSG00000060961	Slc4a4	0.101206	0.064864	-0.0669013	0.0220789	0.93	0.925333	1	0
ENSMUSG00000015889	Lta4h	0.101246	0.0733326	0.0484649	0.014397	0.154	0.119333	1	0
ENSMUSG00000017485	Top2b	0.101382	0.0737116	-0.0982376	0.0196884	0.498	0.517667	1	0	SFARI					2	0
ENSMUSG00000028070	Naxe	0.101409	0.0733427	0.0471487	0.00639251	0.101	0.0733333	1	0
ENSMUSG00000020362	Cnot6	0.101761	0.0776345	0.0542149	0.0238352	0.222	0.183	1	0
ENSMUSG00000028134	Ptbp2	0.10183	0.0296071	0.0845458	0.00730334	0.508	0.472667	1	0	SFARI					2	0
ENSMUSG00000052794	1700030K09Rik	0.101946	0.0863261	0.0435585	0.0123151	0.101	0.0723333	1	0
ENSMUSG00000028710	Atpaf1	0.102038	0.0857346	0.0642574	0.0205215	0.177	0.138333	1	0
ENSMUSG00000002957	Ap2a2	0.102209	0.172404	0.102639	0.0420766	0.295	0.236	1	0
ENSMUSG00000036790	Slitrk2	0.102272	0.140641	0.048525	0.0147704	0.124	0.0903333	1	0	SFARI						1
ENSMUSG00000115099	1700087I21Rik	0.102275	0.0823358	0.0431642	0.0116071	0.118	0.087	1	0
ENSMUSG00000021468	Sptlc1	0.102281	0.0754695	0.0556489	0.0166119	0.184	0.145333	1	0
ENSMUSG00000089743	Gm16226	0.103143	0.0448227	0.0513946	0.0063042	0.164	0.129667	1	0
ENSMUSG00000004771	Rab11a	0.103357	0.0807403	0.0454606	0.00873961	0.126	0.0956667	1	0
ENSMUSG00000033808	Tmem87a	0.103597	0.0574273	0.0689966	0.0219519	0.276	0.237333	1	0
ENSMUSG00000028957	Per3	0.1036	0.135092	-0.0790886	0.0176591	0.174	0.213	1	0
ENSMUSG00000022201	Zfr	0.103798	0.101313	0.0762253	0.022537	0.81	0.759667	1	0
ENSMUSG00000034832	Tet3	0.104024	0.107529	0.0554874	0.0334287	0.387	0.329	1	0	SFARI						1
ENSMUSG00000029840	Mtpn	0.104466	0.163265	0.066414	0.0343632	0.174	0.130333	1	0
ENSMUSG00000036158	Prickle1	0.104512	0.0583333	-0.110375	0.0261928	0.396	0.432	1	0	SFARI					2	0
ENSMUSG00000049421	Zfp260	0.104759	0.0211626	0.0451124	0.00328219	0.129	0.0993333	1	0
ENSMUSG00000026504	Sdccag8	0.104902	0.0669045	-0.0825062	0.0177972	0.368	0.406667	1	0
ENSMUSG00000053626	Tll1	0.105062	0.174267	-0.101082	0.0533904	0.108	0.15	1	0
ENSMUSG00000021314	Amph	0.105113	0.115356	-0.0603348	0.0148903	0.331	0.383667	1	0
ENSMUSG00000003934	Efnb3	0.105261	0.036698	0.0367492	0.00437845	0.108	0.08	1	0
ENSMUSG00000044167	Foxo1	0.105339	0.0940576	-0.0993306	0.0418168	0.563	0.618	1	0
ENSMUSG00000064138	Fam172a	0.105835	0.0743937	-0.058603	0.00267182	0.558	0.595	1	0
ENSMUSG00000031540	Kat6a	0.106136	0.0772302	-0.0643971	0.0149464	0.248	0.291333	1	0	SFARI					2	1
ENSMUSG00000028161	Ppp3ca	0.106455	0.167642	0.0748891	0.0321881	1	1	1	0	SFARI					3	1
ENSMUSG00000000085	Scmh1	0.106458	0.0642843	-0.078515	0.0194652	0.704	0.736667	1	0
ENSMUSG00000026249	Serpine2	0.106462	0.086703	0.0894026	0.0279878	0.329	0.293333	1	0
ENSMUSG00000032320	Rcn2	0.106618	0.0673944	0.0476772	0.0117391	0.149	0.116667	1	0
ENSMUSG00000024112	Cacna1h	0.106711	0.0947864	0.0791076	0.0163299	0.253	0.214667	1	0	SFARI					2	0
ENSMUSG00000086316	Nbdy	0.107107	0.113184	-0.0479652	0.0213512	0.099	0.133	1	0
ENSMUSG00000037818	Abhd18	0.107115	0.0903534	0.0576072	0.0183189	0.257	0.213667	1	0
ENSMUSG00000048410	Zfp407	0.107198	0.0646011	-0.0921763	0.00917229	0.495	0.523667	1	0
ENSMUSG00000022016	Akap11	0.107282	0.111805	-0.10356	0.0249684	0.49	0.529	1	0
ENSMUSG00000004070	Hmox2	0.107407	0.0245646	0.0372688	0.00629087	0.156	0.122667	1	0
ENSMUSG00000027896	Slc16a4	0.107498	0.1421	0.0441885	0.0220468	0.159	0.120667	1	0
ENSMUSG00000055421	Pcdh9	0.107607	0.0924498	-0.0258023	0.0210614	0.942	0.959333	1	0	SFARI					2	0
ENSMUSG00000050587	Lrrc4c	0.107802	0.0465444	-0.0807815	0.0101037	0.997	0.996	1	0	SFARI;EAGLE		Limited	1.25	Discordant	1	0
ENSMUSG00000034593	Myo5a	0.107831	0.0662938	0.0840494	0.0112579	0.828	0.795333	1	0	SFARI					2	0
ENSMUSG00000043987	Cep164	0.108171	0.156838	0.0437427	0.023496	0.134	0.098	1	0
ENSMUSG00000030067	Foxp1	0.108273	0.0955795	-0.0636451	0.0103652	0.997	0.989333	1	0	SFARI;EAGLE;TADA	0	Definitive	60.45	Concordant	1	1
ENSMUSG00000071337	Tia1	0.108454	0.165992	0.0813259	0.0406469	0.614	0.548	1	0
ENSMUSG00000044216	Kcnj4	0.108463	0.0720937	0.0551029	0.015314	0.197	0.161	1	0
ENSMUSG00000025041	Nt5c2	0.108485	0.160301	-0.0978964	0.0373152	0.465	0.514667	1	0
ENSMUSG00000053333	Dis3l2	0.108495	0.111816	-0.0719434	0.0323553	0.427	0.477	1	0
ENSMUSG00000020674	Pxdn	0.108734	0.158713	0.0777819	0.0288661	0.377	0.323667	1	0	SFARI					2	0
ENSMUSG00000090053	Pakap	0.108965	0.0985543	-0.0642422	0.0129224	0.129	0.163	1	0
ENSMUSG00000032870	Smap2	0.109078	0.117861	0.0586657	0.024562	0.333	0.284667	1	0
ENSMUSG00000098973	Mir6236	0.109274	0.113128	0.105838	0.0260624	0.831	0.794667	1	0
ENSMUSG00000046111	Cep295	0.10935	0.154336	-0.0697722	0.0301264	0.179	0.224333	1	0
ENSMUSG00000045983	Eif4g1	0.109356	0.0681144	0.0809991	0.00960719	0.255	0.218	1	0	SFARI					3	0
ENSMUSG00000037617	Spag1	0.109818	0.09358	0.041485	0.0138474	0.101	0.0716667	1	0
ENSMUSG00000027238	Frmd5	0.109915	0.115378	-0.126028	0.0298094	0.71	0.736667	1	0
ENSMUSG00000038564	Ift172	0.110168	0.0636255	0.0618593	0.00657701	0.131	0.102	1	0
ENSMUSG00000022024	Sugt1	0.110317	0.015411	0.0484913	0.00439635	0.151	0.119333	1	0
ENSMUSG00000071644	Eef1g	0.110438	0.0723234	0.0480981	0.010765	0.159	0.125667	1	0
ENSMUSG00000020802	Ube2o	0.110977	0.0644648	0.0528977	0.0133071	0.18	0.145333	1	0
ENSMUSG00000018411	Mapt	0.111049	0.0953979	0.0624428	0.02337	0.512	0.451333	1	0	SFARI					3	0
ENSMUSG00000024750	Zfand5	0.111452	0.0707322	-0.0783627	0.0152103	0.192	0.227	1	0
ENSMUSG00000036333	Kidins220	0.111526	0.0636441	0.157968	0.0128232	0.702	0.671667	1	0
ENSMUSG00000052560	Cpne8	0.111822	0.0892123	0.0378701	0.0326884	0.215	0.174	1	0
ENSMUSG00000029701	Rbm28	0.111857	0.075324	0.0663105	0.0182526	0.406	0.358667	1	0
ENSMUSG00000027131	Emc4	0.112086	0.0364684	0.0452839	0.00361886	0.161	0.128	1	0
ENSMUSG00000019990	Pde7b	0.112181	0.0367758	-0.0490388	0.0164079	0.99	0.987333	1	0
ENSMUSG00000039599	Fam149b	0.112615	0.065501	0.0555067	0.01256	0.217	0.178667	1	0
ENSMUSG00000028034	Fubp1	0.112622	0.0811561	0.105349	0.0177288	0.606	0.575667	1	0
ENSMUSG00000026032	Ndufb3	0.112686	0.157343	0.0656967	0.0324719	0.194	0.151667	1	0
ENSMUSG00000033618	Map3k13	0.112702	0.0618333	-0.0793414	0.0122858	0.359	0.399	1	0
ENSMUSG00000042202	Slc35e2	0.112972	0.110578	0.0475957	0.0144716	0.189	0.151	1	0
ENSMUSG00000044250	Pced1b	0.113001	0.148419	-0.0533683	0.0190657	0.103	0.137333	1	0
ENSMUSG00000068039	Tcp1	0.113126	0.0594941	0.0581383	0.00661943	0.243	0.205333	1	0
ENSMUSG00000025782	Taf3	0.113194	0.10481	-0.0440531	0.0279629	0.161	0.201	1	0
ENSMUSG00000039128	Cdc123	0.113217	0.0825268	0.0474791	0.0166404	0.187	0.15	1	0
ENSMUSG00000069581	Tspear	0.113232	0.103873	0.0316801	0.018815	0.111	0.081	1	0
ENSMUSG00000039385	Cdh6	0.113267	0.103332	-0.0651478	0.0348391	0.171	0.216667	1	0
ENSMUSG00000026259	Ngef	0.113369	0.0872495	0.0692284	0.0267206	0.666	0.622	1	0
ENSMUSG00000000184	Ccnd2	0.113541	0.167398	0.130426	0.0553367	0.43	0.383667	1	0
ENSMUSG00000040548	Tex2	0.113778	0.0122637	-0.0362587	0.00315466	0.106	0.136333	1	0
ENSMUSG00000063887	Nlgn1	0.113782	0.189214	-0.0863937	0.0283289	0.997	1	1	0	SFARI					2	0
ENSMUSG00000024583	Txnl1	0.113787	0.0952701	0.0544793	0.0116755	0.238	0.199333	1	0
ENSMUSG00000034789	Rab24	0.113821	0.10619	0.0398889	0.0195128	0.123	0.0893333	1	0
ENSMUSG00000022240	Ctnnd2	0.113834	0.0601411	-0.0755544	0.00999882	0.987	0.995667	1	0	SFARI					2	0
ENSMUSG00000014554	Dguok	0.113978	0.0405155	0.05533	0.0089016	0.23	0.193333	1	0
ENSMUSG00000024826	Dpf2	0.114029	0.0467426	0.0456935	0.00247531	0.136	0.106	1	0
ENSMUSG00000006575	Rundc3a	0.114063	0.109315	0.0457712	0.0152927	0.164	0.129333	1	0
ENSMUSG00000038252	Ncapd2	0.114481	0.187643	0.0495642	0.0243232	0.106	0.071	1	0
ENSMUSG00000002129	Sf3a1	0.114563	0.0947273	0.0523752	0.0119446	0.159	0.126	1	0
ENSMUSG00000053395	Cacng8	0.114627	0.0707972	0.0541823	0.013333	0.172	0.138	1	0
ENSMUSG00000072235	Tuba1a	0.114913	0.0758922	0.0772753	0.0234852	0.225	0.188667	1	0
ENSMUSG00000069769	Msi2	0.114929	0.0379578	-0.075281	0.0156107	0.268	0.303667	1	0
ENSMUSG00000038462	Uqcrfs1	0.115243	0.085177	0.0478464	0.0134743	0.104	0.0766667	1	0
ENSMUSG00000097040	2610316D01Rik	0.115554	0.0901289	0.0630391	0.0220132	0.215	0.176667	1	0
ENSMUSG00000034557	Zfyve9	0.115592	0.0843364	-0.087826	0.0111216	0.507	0.536	1	0
ENSMUSG00000038039	Gcc2	0.115603	0.0536635	0.085883	0.00536755	0.334	0.294667	1	0
ENSMUSG00000015291	Gdi1	0.115639	0.0469279	0.0611746	0.006032	0.27	0.23	1	0
ENSMUSG00000042453	Reln	0.11587	0.0293936	-0.0899997	0.0207195	0.608	0.647333	1	0	SFARI;EAGLE		Disputed	7.2; contradictory evidence	Discordant	1	0
ENSMUSG00000041649	Klf8	0.115983	0.159363	0.0636327	0.0227651	0.179	0.139	1	0
ENSMUSG00000042439	Zfp532	0.117451	0.0834183	-0.0619904	0.0158283	0.265	0.309333	1	0
ENSMUSG00000020111	Micu1	0.117486	0.149541	-0.069102	0.0355465	0.371	0.424667	1	0
ENSMUSG00000022883	Robo1	0.117906	0.152277	0.0781719	0.0401636	0.98	0.982667	1	0
ENSMUSG00000030329	Pianp	0.117937	0.0560789	0.0440006	0.00507892	0.106	0.0796667	1	0
ENSMUSG00000026109	Tmeff2	0.118069	0.170724	-0.225742	0.0534685	0.599	0.614667	1	0
ENSMUSG00000001229	Dpp9	0.118423	0.0992558	0.0353085	0.00986565	0.113	0.0833333	1	0
ENSMUSG00000059142	Zfp945	0.118523	0.110456	-0.0608704	0.0122995	0.131	0.163333	1	0
ENSMUSG00000069729	Arid1b	0.118531	0.112337	-0.0766162	0.0238368	0.755	0.757	1	0	SFARI;EAGLE;TADA	5.27e-13	Definitive	34.75	Concordant	1	1
ENSMUSG00000030350	Prmt8	0.118579	0.0980206	0.0352675	0.0199755	0.334	0.280333	1	0
ENSMUSG00000020571	Pdia6	0.118648	0.0804287	0.0584686	0.0122775	0.131	0.101667	1	0
ENSMUSG00000030231	Plekha5	0.118775	0.0978605	0.0669091	0.0143429	0.955	0.944	1	0
ENSMUSG00000026787	Gad2	0.118825	0.0909688	0.0862016	0.0105983	0.556	0.510333	1	0
ENSMUSG00000079481	Nhsl2	0.11886	0.149998	0.0700294	0.0283656	0.376	0.327333	1	0
ENSMUSG00000041297	Cdk13	0.119024	0.127128	-0.058868	0.0173027	0.626	0.657333	1	0	SFARI						1
ENSMUSG00000001774	Chordc1	0.119534	0.0302389	0.0456522	0.00473009	0.267	0.226667	1	0
ENSMUSG00000021178	Psmc1	0.119664	0.105862	0.041935	0.0152911	0.144	0.112	1	0
ENSMUSG00000033790	Tubgcp5	0.119761	0.174566	0.0701312	0.0305212	0.217	0.173	1	0	SFARI					2	0
ENSMUSG00000021614	Vcan	0.119895	0.104166	-0.0853403	0.0244387	0.127	0.160667	1	0
ENSMUSG00000028563	Tm2d1	0.120084	0.136487	0.0639343	0.0174175	0.192	0.154	1	0
ENSMUSG00000049252	Lrp1b	0.120322	0.133801	-0.0884583	0.0294476	0.997	0.998667	1	0
ENSMUSG00000034201	Gas2l1	0.12069	0.107851	0.0410222	0.00970377	0.127	0.097	1	0
ENSMUSG00000101463	Gm28750	0.121565	0.0184049	0.059813	0.00683856	0.134	0.106667	1	0
ENSMUSG00000021945	Zmym2	0.121586	0.120705	0.0732269	0.0178507	0.604	0.561667	1	0	SFARI					2	1
ENSMUSG00000014786	Slc9a5	0.121769	0.0065037	0.0557457	0.00473936	0.177	0.144667	1	0
ENSMUSG00000000266	Mid2	0.121792	0.144349	0.0460802	0.0233532	0.167	0.131333	1	0
ENSMUSG00000063873	Slc24a3	0.121854	0.106888	-0.0676382	0.00821843	0.159	0.193667	1	0
ENSMUSG00000060036	Rpl3	0.122227	0.106522	0.0517415	0.0163213	0.137	0.104667	1	0
ENSMUSG00000089710	Gm15810	0.122585	0.0793754	0.0570966	0.0184124	0.392	0.348	1	0
ENSMUSG00000048758	Rpl29	0.122845	0.107595	0.058882	0.0236969	0.154	0.118	1	0
ENSMUSG00000030525	Chrna7	0.122936	0.0305294	-0.0524623	0.0171457	0.25	0.291	1	0	SFARI					2	0
ENSMUSG00000037653	Kctd8	0.122991	0.0994228	-0.130282	0.039989	0.677	0.692667	1	0
ENSMUSG00000025982	Sf3b1	0.123165	0.0971233	0.0735048	0.029724	0.662	0.610667	1	0	SFARI					2	0
ENSMUSG00000025777	Gdap1	0.123276	0.104529	0.074511	0.0273336	0.283	0.238333	1	0
ENSMUSG00000002679	Med6	0.123285	0.0903341	0.0387864	0.0146112	0.136	0.104333	1	0
ENSMUSG00000047434	Xxylt1	0.123395	0.0832525	0.0471311	0.0065477	0.132	0.102667	1	0
ENSMUSG00000038563	Efl1	0.123602	0.155214	-0.0451756	0.0132825	0.123	0.158333	1	0
ENSMUSG00000022114	Spry2	0.123607	0.0210502	0.0552127	0.00187607	0.26	0.221333	1	0	SFARI;TADA	0.0397936				2	0
ENSMUSG00000031066	Usp11	0.12362	0.0942904	0.0567302	0.0174294	0.197	0.159333	1	0
ENSMUSG00000041477	Dcp1b	0.123744	0.0587295	0.03621	0.0173364	0.232	0.193	1	0
ENSMUSG00000027546	Atp9a	0.123754	0.0942309	0.0583328	0.0185588	0.346	0.303667	1	0
ENSMUSG00000085996	A830012C17Rik	0.123754	0.10358	0.0599657	0.0100064	0.113	0.085	1	0
ENSMUSG00000042323	Pbrm1	0.123778	0.0357655	0.0291336	0.00597378	0.401	0.348333	1	0
ENSMUSG00000031996	Aplp2	0.123802	0.100638	0.102647	0.0199332	0.49	0.451	1	0
ENSMUSG00000028906	Epb41	0.123817	0.0314143	0.0743494	0.0134667	0.742	0.718667	1	0
ENSMUSG00000003410	Elavl3	0.123834	0.201937	0.0872544	0.0463209	0.27	0.216333	1	0	SFARI;EAGLE		Limited	1	Discordant	1	0
ENSMUSG00000032788	Pdxk	0.123944	0.027914	0.0531374	0.00208181	0.159	0.128	1	0
ENSMUSG00000042604	Kcna4	0.124073	0.0623182	-0.0655116	0.0195909	0.371	0.404333	1	0
ENSMUSG00000030518	Fam189a1	0.124148	0.108382	-0.11166	0.033256	0.561	0.576667	1	0
ENSMUSG00000020623	Map2k6	0.124231	0.156501	0.03444	0.0271218	0.161	0.123	1	0
ENSMUSG00000022228	Zscan26	0.124355	0.0639016	-0.0367679	0.0127487	0.222	0.263667	1	0
ENSMUSG00000049800	Sertad2	0.124813	0.0797389	0.10752	0.0137279	0.449	0.418333	1	0
ENSMUSG00000032185	Carm1	0.124885	0.0797323	0.0483093	0.0115928	0.151	0.119667	1	0
ENSMUSG00000023852	Chd1	0.12499	0.0673153	0.0409822	0.010524	0.257	0.214	1	0	SFARI					2	1
ENSMUSG00000029775	Klhdc10	0.125063	0.0973061	-0.0588659	0.0343263	0.379	0.424	1	0
ENSMUSG00000027566	Psma7	0.125551	0.104793	0.0447873	0.018103	0.157	0.121333	1	0
ENSMUSG00000034342	Cbl	0.125704	0.136266	0.0784845	0.0182014	0.318	0.277	1	0
ENSMUSG00000037270	4932438A13Rik	0.125822	0.0765879	-0.0724972	0.0122188	0.709	0.732	1	0
ENSMUSG00000094483	Purb	0.125855	0.108186	0.0464167	0.0304087	0.137	0.102667	1	0
ENSMUSG00000051403	Ppp1r37	0.125888	0.0587571	0.0423311	0.00840337	0.166	0.133333	1	0
ENSMUSG00000097451	Rian	0.125912	0.097211	0.0385969	0.0213473	0.978	0.979	1	0
ENSMUSG00000010517	Faf1	0.126381	0.122885	-0.0873903	0.0269911	0.697	0.728333	1	0
ENSMUSG00000019831	Wasf1	0.126812	0.122134	0.0842125	0.0354586	0.752	0.705	1	0	SFARI						1
ENSMUSG00000019146	Cacng2	0.126908	0.0909196	-0.0583768	0.0198772	0.267	0.311	1	0
ENSMUSG00000017778	Cox7c	0.12737	0.156222	0.0799431	0.0261352	0.316	0.274333	1	0
ENSMUSG00000020387	Jade2	0.127374	0.118732	0.043204	0.0175147	0.109	0.081	1	0
ENSMUSG00000025439	Clns1a	0.127406	0.0583208	0.0398057	0.00450335	0.123	0.0946667	1	0
ENSMUSG00000059208	Hnrnpm	0.128228	0.114253	0.0919813	0.0293496	0.518	0.475667	1	0
ENSMUSG00000060098	Prmt7	0.128532	0.107443	0.0522933	0.00498023	0.124	0.096	1	0
ENSMUSG00000031433	Rbm41	0.128876	0.0876579	0.067801	0.0118292	0.219	0.183333	1	0
ENSMUSG00000026527	Rgs7	0.12902	0.098744	-0.0821174	0.0217	0.886	0.893	1	0	SFARI					2	0
ENSMUSG00000042726	Trafd1	0.129095	0.0946633	0.0378486	0.0150669	0.152	0.120333	1	0
ENSMUSG00000032637	Atxn2l	0.129302	0.0545866	0.07131	0.00951903	0.255	0.22	1	0
ENSMUSG00000021282	Eif5	0.129424	0.100144	0.0539085	0.012274	0.242	0.204	1	0
ENSMUSG00000004347	Pde1c	0.129488	0.207192	-0.110636	0.0932257	0.609	0.667	1	0	SFARI					2	0
ENSMUSG00000071753	Cdr1os	0.129635	0.0843914	0.0638843	0.0117383	0.863	0.870333	1	0
ENSMUSG00000110803	Gm20275	0.12975	0.179843	-0.0867404	0.050733	0.488	0.529667	1	0
ENSMUSG00000058546	Rpl23a	0.129795	0.0541021	0.0382716	0.00634383	0.106	0.0803333	1	0
ENSMUSG00000032652	Crebl2	0.129862	0.120723	0.0456317	0.0122689	0.101	0.0746667	1	0
ENSMUSG00000066607	Insyn1	0.130216	0.162108	0.0478461	0.0134042	0.106	0.0776667	1	0
ENSMUSG00000034575	Tent4a	0.130231	0.169784	0.0598652	0.0208141	0.123	0.0913333	1	0
ENSMUSG00000035268	Pkig	0.130267	0.0790001	-0.0716136	0.0216972	0.296	0.332333	1	0
ENSMUSG00000032712	Resf1	0.130632	0.0899748	0.0378976	0.0119883	0.118	0.0886667	1	0
ENSMUSG00000031904	Slc7a6	0.130884	0.143694	0.0365503	0.0102846	0.225	0.183333	1	0
ENSMUSG00000028883	Sema3a	0.130934	0.114178	-0.0956873	0.0193193	0.306	0.343333	1	0
ENSMUSG00000040667	Nup88	0.131044	0.107937	0.0564569	0.0294154	0.23	0.189	1	0
ENSMUSG00000003072	Atp5d	0.131382	0.176078	0.0649397	0.0147325	0.162	0.127	1	0
ENSMUSG00000051510	Mafg	0.131606	0.0332222	0.04156	0.00716049	0.177	0.144333	1	0
ENSMUSG00000051065	Mb21d2	0.131707	0.118168	0.0568465	0.037098	0.162	0.121667	1	0
ENSMUSG00000019916	P4ha1	0.131866	0.120963	-0.0687265	0.02567	0.457	0.497667	1	0
ENSMUSG00000007653	Gabrb2	0.131923	0.213138	-0.112712	0.0337664	0.654	0.685333	1	0	SFARI;EAGLE		Limited	0.3	Discordant	1	0
ENSMUSG00000005580	Adcy9	0.132041	0.152275	0.0475842	0.0261822	0.773	0.713	1	0
ENSMUSG00000054428	Atpif1	0.132053	0.13887	0.0556156	0.0300383	0.209	0.168333	1	0
ENSMUSG00000026819	Slc25a25	0.132342	0.0832071	0.0606182	0.0171968	0.262	0.221667	1	0
ENSMUSG00000026648	Dclre1c	0.132778	0.126778	0.0311753	0.0101271	0.101	0.0746667	1	0
ENSMUSG00000100252	Mir124-2hg	0.132778	0.0359885	-0.0377769	0.00439778	0.247	0.287333	1	0
ENSMUSG00000038664	Herc1	0.132846	0.0529031	0.0523986	0.0083848	0.873	0.846667	1	0	SFARI					2	1
ENSMUSG00000039470	Zdhhc2	0.132997	0.114988	0.0712573	0.0210236	0.396	0.352	1	0
ENSMUSG00000000560	Gabra2	0.133137	0.0580566	-0.0848478	0.0164641	0.82	0.825	1	0
ENSMUSG00000021112	Pals1	0.133187	0.0837366	0.0666097	0.0128932	0.146	0.116667	1	0
ENSMUSG00000039307	Hexdc	0.134298	0.137429	0.0495833	0.0137857	0.157	0.124333	1	0
ENSMUSG00000020181	Nav3	0.134316	0.110356	0.0861627	0.0168322	0.894	0.855333	1	0	SFARI					2	0
ENSMUSG00000026319	Relch	0.13446	0.0579841	0.0524218	0.00737069	0.614	0.565667	1	0
ENSMUSG00000053825	Ppfia2	0.134488	0.130811	0.069985	0.0257667	0.844	0.807333	1	0
ENSMUSG00000027272	Ubr1	0.134771	0.0647594	0.0666328	0.0187985	0.427	0.386667	1	0	SFARI;EAGLE;TADA	0.0580082	Limited	1.6	Discordant	1	0
ENSMUSG00000021843	Ktn1	0.134899	0.0873692	0.056728	0.0104702	0.719	0.662667	1	0
ENSMUSG00000029838	Ptn	0.135094	0.0914376	-0.065046	0.0345712	0.255	0.295333	1	0
ENSMUSG00000021810	Ecd	0.135279	0.115435	-0.0362073	0.0152666	0.108	0.138333	1	0
ENSMUSG00000006998	Psmd2	0.135375	0.168025	0.0500308	0.0142693	0.136	0.104333	1	0
ENSMUSG00000037062	Sh3glb1	0.135494	0.0712574	0.0433555	0.0101914	0.174	0.141333	1	0
ENSMUSG00000048720	Tbc1d12	0.135565	0.0391626	0.0582712	0.00391103	0.245	0.209667	1	0
ENSMUSG00000029647	Pan3	0.135731	0.068588	-0.0734306	0.0180461	0.565	0.588667	1	0
ENSMUSG00000060279	Ap2a1	0.135743	0.13952	0.0611161	0.0153571	0.19	0.156	1	0
ENSMUSG00000031446	Cul4a	0.135794	0.0972986	0.0522439	0.0149056	0.159	0.127333	1	0
ENSMUSG00000035949	Fbxw2	0.135954	0.0984923	-0.0428579	0.020023	0.159	0.193	1	0
ENSMUSG00000029655	N4bp2l2	0.136104	0.148492	-0.0723992	0.0239268	0.447	0.501	1	0
ENSMUSG00000024403	Atp6v1g2	0.136243	0.0930605	0.0367658	0.00952558	0.108	0.0816667	1	0
ENSMUSG00000026620	Mark1	0.136476	0.103477	-0.0592632	0.0226818	0.558	0.602667	1	0	SFARI					2	0
ENSMUSG00000025156	Gps1	0.136488	0.0593788	0.0339355	0.00947757	0.151	0.120333	1	0
ENSMUSG00000024424	Ttc39c	0.136518	0.0989759	0.0312766	0.0105308	0.134	0.104	1	0
ENSMUSG00000018417	Myo1b	0.136662	0.110984	-0.0711853	0.0321946	0.411	0.459667	1	0
ENSMUSG00000062590	Armc9	0.136824	0.0789167	0.061263	0.0241108	0.389	0.350667	1	0
ENSMUSG00000020375	Rufy1	0.137025	0.128443	0.0370291	0.0151663	0.119	0.0903333	1	0
ENSMUSG00000019894	Slc6a15	0.137122	0.0417764	0.0491591	0.0150359	0.194	0.16	1	0
ENSMUSG00000038291	Snx25	0.137373	0.0265838	-0.0858986	0.00941295	0.348	0.383667	1	0
ENSMUSG00000042705	Commd10	0.137446	0.125435	0.0819362	0.0181336	0.296	0.258333	1	0
ENSMUSG00000031751	Amfr	0.13752	0.130684	0.0518455	0.0276638	0.222	0.181	1	0
ENSMUSG00000052632	Asap2	0.137551	0.0140497	0.0327106	0.00249011	0.111	0.0846667	1	0	SFARI					2	0
ENSMUSG00000063760	Rnf217	0.137607	0.167218	0.0335576	0.0152462	0.134	0.101333	1	0
ENSMUSG00000037487	Ubr5	0.137781	0.174105	0.0898499	0.0290366	0.82	0.768667	1	0	SFARI					2	0
ENSMUSG00000028931	Kcnab2	0.137781	0.0407965	0.0200782	0.00843186	0.154	0.122	1	0
ENSMUSG00000061787	Rps17	0.137799	0.0530473	0.0499311	0.00503289	0.116	0.0906667	1	0
ENSMUSG00000041530	Ago1	0.137869	0.0677631	0.0385122	0.0128409	0.175	0.142333	1	0	SFARI					2	0
ENSMUSG00000026748	Plxdc2	0.13788	0.205722	-0.0979996	0.0553464	0.267	0.311667	1	0
ENSMUSG00000020882	Cacnb1	0.138162	0.104232	0.049517	0.0184083	0.215	0.178333	1	0	SFARI					3	0
ENSMUSG00000021830	Txndc16	0.138608	0.139882	0.0675316	0.0233324	0.411	0.360667	1	0
ENSMUSG00000071657	Bscl2	0.138611	0.167869	0.0463353	0.0166391	0.136	0.104333	1	0
ENSMUSG00000029922	Mkrn1	0.138779	0.0635035	0.0430554	0.016835	0.194	0.16	1	0
ENSMUSG00000032624	Eml4	0.139238	0.198445	0.0693625	0.0383763	0.396	0.341333	1	0
ENSMUSG00000069135	Cep43	0.139274	0.0583227	-0.0329674	0.00884307	0.086	0.112667	1	0
ENSMUSG00000028345	Tex10	0.139315	0.0905702	0.035001	0.0225735	0.374	0.325667	1	0
ENSMUSG00000023923	Tbc1d5	0.139318	0.171173	-0.106552	0.0459295	0.624	0.666667	1	0	SFARI					2	0
ENSMUSG00000025241	Fyco1	0.139324	0.171627	0.0779974	0.0205488	0.237	0.200333	1	0
ENSMUSG00000047085	Lrrc4b	0.139338	0.106369	0.0268945	0.013686	0.164	0.129	1	0
ENSMUSG00000043467	Zbtb37	0.139443	0.075424	0.0333071	0.00553109	0.103	0.077	1	0
ENSMUSG00000026623	Lpgat1	0.13948	0.129032	-0.0978459	0.0107045	0.414	0.441333	1	0
ENSMUSG00000058013	Septin11	0.139822	0.121286	0.0431693	0.0131719	0.444	0.394333	1	0
ENSMUSG00000033713	Foxn3	0.140133	0.112648	-0.0603563	0.0243367	0.111	0.143	1	0
ENSMUSG00000034353	Ramp1	0.140187	0.0860748	0.0563924	0.0126256	0.308	0.267	1	0
ENSMUSG00000032705	Exd2	0.140384	0.152674	0.0502183	0.0225197	0.209	0.170667	1	0
ENSMUSG00000056812	St8sia3	0.140401	0.0347896	0.0836361	0.0131291	0.464	0.434667	1	0
ENSMUSG00000089940	Gm4117	0.140457	0.0936837	0.0359949	0.0120611	0.103	0.0773333	1	0
ENSMUSG00000052812	Atad2b	0.140623	0.0126895	0.0600602	0.00613636	0.344	0.304	1	0
ENSMUSG00000002968	Med25	0.140743	0.173144	0.0510776	0.0244091	0.161	0.123667	1	0
ENSMUSG00000029505	Ep400	0.14081	0.119039	0.0720175	0.0185529	0.406	0.366	1	0	SFARI					2	0
ENSMUSG00000054555	Adam12	0.140994	0.125183	0.0333025	0.0289892	0.204	0.166	1	0
ENSMUSG00000028229	Rmdn1	0.141045	0.133291	-0.0572586	0.0305107	0.445	0.491	1	0
ENSMUSG00000036309	Skp1	0.141045	0.134622	0.0399867	0.0234544	0.121	0.0893333	1	0
ENSMUSG00000031441	Atp11a	0.141283	0.0730033	0.0617643	0.0169623	0.315	0.273	1	0
ENSMUSG00000055540	Epha6	0.141695	0.0100443	0.106477	0.00495095	0.955	0.953667	1	0
ENSMUSG00000058297	Spock2	0.141768	0.233113	0.0908702	0.0383527	0.31	0.258667	1	0
ENSMUSG00000004677	Myo9b	0.14177	0.0706721	0.0333487	0.0111353	0.189	0.154333	1	0	SFARI					2	0
ENSMUSG00000021039	Snw1	0.14206	0.0724326	0.0468451	0.00813374	0.192	0.159	1	0
ENSMUSG00000019969	Psen1	0.142122	0.138976	0.0547021	0.0281465	0.247	0.204333	1	0
ENSMUSG00000041762	Gpr155	0.142267	0.197136	0.0832535	0.0360708	0.46	0.408	1	0
ENSMUSG00000024059	Clip4	0.142302	0.164514	0.0857763	0.0340754	0.487	0.443	1	0
ENSMUSG00000038248	Sobp	0.142752	0.211142	-0.0481809	0.0274994	0.086	0.119	1	0
ENSMUSG00000034610	Tut4	0.142848	0.0305528	0.0645999	0.0117116	0.664	0.612333	1	0
ENSMUSG00000026409	Pfkfb2	0.143361	0.198227	0.0431045	0.0207989	0.121	0.0886667	1	0
ENSMUSG00000019726	Lyst	0.143501	0.114038	-0.0778713	0.035705	0.674	0.696	1	0
ENSMUSG00000029389	Ddx55	0.143523	0.109421	0.0419068	0.0142507	0.154	0.122667	1	0
ENSMUSG00000055409	Nell1	0.143669	0.132986	-0.0895614	0.0164766	0.561	0.595333	1	0
ENSMUSG00000047766	Lrrc49	0.143943	0.125476	-0.0966319	0.0394443	0.452	0.49	1	0
ENSMUSG00000027010	Slc25a12	0.143966	0.0918864	0.0784061	0.024066	0.338	0.302333	1	0	SFARI					2	0
ENSMUSG00000004591	Pkn2	0.143996	0.0645324	-0.0749523	0.0065028	0.397	0.433	1	0
ENSMUSG00000073427	Gm4924	0.144169	0.0491607	0.0454613	0.00315983	0.164	0.133333	1	0
ENSMUSG00000021313	Ryr2	0.144189	0.203736	-0.0977615	0.028864	0.732	0.744	1	0
ENSMUSG00000020570	Sypl	0.144428	0.0323576	0.0262736	0.00990134	0.124	0.0966667	1	0
ENSMUSG00000105736	Gm42456	0.144658	0.0866889	0.0615367	0.0155902	0.238	0.204667	1	0
ENSMUSG00000052105	Mtcl1	0.144796	0.0700935	-0.0692797	0.0176391	0.677	0.697333	1	0
ENSMUSG00000005506	Celf1	0.144882	0.153166	-0.0690001	0.0295654	0.818	0.813667	1	0
ENSMUSG00000032042	Srpr	0.144885	0.100812	0.0413288	0.015069	0.247	0.207	1	0	SFARI;EAGLE;TADA	0.00051136	Limited	4.75	Discordant	1	0
ENSMUSG00000062270	Morf4l1	0.144971	0.227329	0.0730452	0.0369438	0.369	0.313	1	0
ENSMUSG00000028809	Srrm1	0.145316	0.0484349	0.0784878	0.0198119	0.502	0.467	1	0
ENSMUSG00000056493	Foxk1	0.145571	0.0254883	0.0502628	0.00426204	0.137	0.111	1	0
ENSMUSG00000021846	Peli2	0.145821	0.158357	0.0785707	0.0296544	0.389	0.347333	1	0
ENSMUSG00000062949	Atp11c	0.145834	0.161737	-0.0476601	0.0284145	0.286	0.333667	1	0
ENSMUSG00000001424	Snd1	0.145886	0.113101	-0.0614699	0.0334391	0.439	0.478	1	0	SFARI					2	0
ENSMUSG00000035469	Rcbtb1	0.14589	0.207302	-0.0482668	0.0195666	0.094	0.126333	1	0
ENSMUSG00000024277	Mapre2	0.145894	0.0616049	-0.0873013	0.0118248	0.341	0.373667	1	0
ENSMUSG00000031634	Ufsp2	0.145912	0.0201465	0.05024	0.00121331	0.156	0.127333	1	0
ENSMUSG00000024099	Ndufv2	0.146011	0.0463994	0.0635327	0.00639255	0.291	0.256	1	0
ENSMUSG00000032258	Lca5	0.146157	0.155722	0.0610378	0.0149275	0.205	0.170667	1	0
ENSMUSG00000021420	Fars2	0.146238	0.111007	-0.0679884	0.0265523	0.482	0.519667	1	0
ENSMUSG00000038429	Usp5	0.146247	0.0902147	0.0488069	0.0130073	0.144	0.115667	1	0
ENSMUSG00000074212	Dnajb14	0.14626	0.10621	0.0712521	0.0190557	0.177	0.146333	1	0
ENSMUSG00000027361	Gabpb1	0.146278	0.123173	0.0428293	0.0180155	0.2	0.161667	1	0
ENSMUSG00000029106	Add1	0.146565	0.126732	0.0634106	0.0233578	0.464	0.425333	1	0
ENSMUSG00000003721	Insig2	0.146644	0.104631	0.0453462	0.0126704	0.127	0.0993333	1	0
ENSMUSG00000039159	Ube2h	0.14669	0.093163	0.0604165	0.0137956	0.32	0.280333	1	0	SFARI					2	0
ENSMUSG00000039852	Rere	0.146695	0.166758	-0.0798452	0.032084	0.773	0.788333	1	0	SFARI;EAGLE		Moderate	6.5	Discordant	1	1
ENSMUSG00000020827	Mink1	0.146857	0.202568	0.0716557	0.0346188	0.478	0.431667	1	0	SFARI					3	0
ENSMUSG00000033530	Ttc7b	0.14724	0.219604	0.0881782	0.0427453	0.467	0.406	1	0
ENSMUSG00000020376	Rnf130	0.14808	0.0217239	-0.0358633	0.00460997	0.199	0.234667	1	0
ENSMUSG00000030655	Smg1	0.148083	0.0658103	0.0826532	0.0171847	0.672	0.639667	1	0
ENSMUSG00000063884	Ptcd3	0.148629	0.157331	0.0730399	0.033119	0.275	0.233	1	0
ENSMUSG00000055296	Tmem245	0.14871	0.143309	0.0512168	0.0215831	0.202	0.168	1	0
ENSMUSG00000024998	Plce1	0.148732	0.0602504	0.0257902	0.0108313	0.104	0.0793333	1	0
ENSMUSG00000022517	Mgrn1	0.148762	0.103936	0.0486111	0.0107203	0.233	0.199333	1	0
ENSMUSG00000037151	Lrrc20	0.149072	0.117597	0.0371956	0.0154222	0.118	0.0886667	1	0
ENSMUSG00000042133	Ppig	0.149092	0.04108	0.0575678	0.0216205	0.364	0.323333	1	0
ENSMUSG00000036435	Exoc1	0.149107	0.107495	-0.0492908	0.0126427	0.127	0.157333	1	0
ENSMUSG00000038550	Ciart	0.149269	0.105088	0.039507	0.00881893	0.118	0.091	1	0
ENSMUSG00000039630	Hnrnpu	0.149381	0.0678821	-0.0531938	0.0080065	0.618	0.659333	1	0	SFARI					1	1
ENSMUSG00000024502	Jakmip2	0.149932	0.107861	-0.076061	0.0188357	0.55	0.585333	1	0
ENSMUSG00000043535	Setx	0.149941	0.0679338	0.0306864	0.0157546	0.296	0.255	1	0
ENSMUSG00000013921	Clip3	0.149961	0.111627	0.0417482	0.00704982	0.109	0.084	1	0
ENSMUSG00000027270	Lamp5	0.150071	0.064391	0.0607282	0.0163327	0.22	0.187667	1	0
ENSMUSG00000117521	Gm50024	0.150098	0.169601	-0.0896891	0.0343162	0.268	0.307333	1	0
ENSMUSG00000028637	Ccdc30	0.15015	0.0969018	0.0461181	0.0201956	0.24	0.203	1	0
ENSMUSG00000038611	Phrf1	0.150203	0.0957587	0.0253892	0.013335	0.132	0.103	1	0	SFARI					2	0
ENSMUSG00000039419	Cntnap2	0.150249	0.190123	0.0667263	0.0205064	1	0.999333	1	0	SFARI;EAGLE		Refuted	—	Discordant	2	1
ENSMUSG00000037624	Kcnk2	0.150363	0.147358	-0.084774	0.0427867	0.765	0.764667	1	0
ENSMUSG00000015568	Lpl	0.150687	0.0881396	0.0345804	0.0100281	0.106	0.081	1	0
ENSMUSG00000027805	Pfn2	0.15077	0.138044	0.0348871	0.0176925	0.167	0.134	1	0
ENSMUSG00000020992	4930512B01Rik	0.15081	0.0554574	-0.0414447	0.0100082	0.088	0.112667	1	0
ENSMUSG00000026458	Ppfia4	0.151076	0.11787	0.0244214	0.0120079	0.141	0.109667	1	0
ENSMUSG00000031732	Phlpp2	0.151122	0.0599069	0.0403753	0.00984921	0.156	0.125667	1	0
ENSMUSG00000021840	Mapk1ip1l	0.151157	0.0939289	-0.062634	0.015675	0.124	0.152	1	0
ENSMUSG00000055109	Gm15155	0.151203	0.142287	0.101514	0.0213492	0.685	0.668333	1	0	SFARI;EAGLE		Definitive	17.6	Discordant	2	0
ENSMUSG00000024477	Pggt1b	0.151318	0.0870738	0.0376007	0.00817267	0.121	0.094	1	0
ENSMUSG00000078307	AI593442	0.151387	0.173141	0.0648534	0.0206355	0.265	0.224667	1	0
ENSMUSG00000078490	Cfap74	0.151424	0.184385	0.0470439	0.0269011	0.146	0.113	1	0
ENSMUSG00000026004	Kansl1l	0.151499	0.166761	-0.0831315	0.0360005	0.457	0.504333	1	0
ENSMUSG00000054079	Utp18	0.151569	0.0526607	0.0384406	0.00940067	0.177	0.145	1	0
ENSMUSG00000038807	Rap1gap2	0.151767	0.0695568	-0.057379	0.00904475	0.222	0.258	1	0
ENSMUSG00000022551	Cyc1	0.151784	0.0522522	0.03285	0.00441725	0.137	0.109333	1	0
ENSMUSG00000024302	Dtna	0.152244	0.101821	-0.0865644	0.0208526	0.586	0.594667	1	0
ENSMUSG00000033510	Otud7a	0.15234	0.200366	-0.106265	0.0500635	0.661	0.682	1	0	SFARI					2	0
ENSMUSG00000049321	Zfp2	0.152358	0.0270394	0.0438839	0.00424323	0.139	0.112	1	0
ENSMUSG00000033948	Zswim5	0.152785	0.075988	0.0904985	0.0242294	0.482	0.451667	1	0
ENSMUSG00000062647	Rpl7a	0.152786	0.128949	0.0429479	0.0142993	0.132	0.103333	1	0
ENSMUSG00000062797	Hikeshi	0.152802	0.132202	0.0428976	0.0160564	0.132	0.104	1	0
ENSMUSG00000028126	Pip5k1a	0.152882	0.106851	0.0636864	0.0325778	0.487	0.441	1	0
ENSMUSG00000032410	Xrn1	0.152989	0.0658343	0.0592361	0.0208806	0.44	0.393	1	0
ENSMUSG00000117317	Gm49961	0.153426	0.0409011	-0.0815233	0.0147917	0.169	0.196667	1	0
ENSMUSG00000032826	Ank2	0.153553	0.0276018	-0.0633779	0.0143477	0.952	0.962667	1	0	SFARI;EAGLE;TADA	0.00174365	Moderate	10.8	Discordant	1	0
ENSMUSG00000033257	Ttll4	0.15371	0.0677877	0.0380128	0.00630677	0.171	0.140333	1	0
ENSMUSG00000067973	Gm6994	0.153716	0.0857269	0.0509564	0.0111197	0.182	0.150667	1	0
ENSMUSG00000026478	Lamc1	0.153877	0.0336445	-0.0569076	0.0138614	0.245	0.279667	1	0
ENSMUSG00000034007	Scaper	0.153895	0.0655889	-0.0570841	0.019374	0.452	0.494333	1	0
ENSMUSG00000052917	Senp7	0.154029	0.0454753	0.0630914	0.00505767	0.57	0.530667	1	0
ENSMUSG00000025867	Cplx2	0.154047	0.258662	0.0829903	0.0366455	0.235	0.187667	1	0
ENSMUSG00000034551	Hdx	0.154422	0.102581	-0.0480385	0.0155302	0.205	0.242	1	0
ENSMUSG00000030064	Frmd4b	0.154751	0.0596781	-0.0747911	0.00682602	0.5	0.531	1	0
ENSMUSG00000054391	4930517O19Rik	0.154879	0.0302398	0.0290386	0.00539821	0.123	0.096	1	0
ENSMUSG00000041949	Tango6	0.154884	0.213996	0.0494415	0.0215771	0.142	0.11	1	0
ENSMUSG00000054843	Atrnl1	0.154975	0.0954019	-0.070802	0.0103308	0.745	0.754333	1	0
ENSMUSG00000040479	Dgkz	0.155532	0.144592	0.0340888	0.0181363	0.147	0.116	1	0
ENSMUSG00000052920	Prkg1	0.155539	0.0338222	0.0844088	0.0479886	0.43	0.395333	1	0
ENSMUSG00000060212	Pcnx2	0.15572	0.116783	0.0506448	0.0247432	0.316	0.273667	1	0
ENSMUSG00000016921	Srsf6	0.155796	0.181612	0.0638688	0.018873	0.209	0.172333	1	0
ENSMUSG00000030002	Dusp11	0.155898	0.0409725	0.049691	0.00586474	0.427	0.378333	1	0
ENSMUSG00000036707	Cab39	0.156137	0.122432	-0.0634215	0.0160891	0.192	0.225	1	0
ENSMUSG00000028639	Ybx1	0.156163	0.0563638	0.0547816	0.00566144	0.32	0.283333	1	0
ENSMUSG00000043154	Ppp2r3a	0.156407	0.160404	-0.0742709	0.0287628	0.174	0.209333	1	0
ENSMUSG00000079564	Gm11149	0.156579	0.176754	-0.0535626	0.033545	0.118	0.150333	1	0
ENSMUSG00000029276	Glmn	0.156761	0.192489	-0.0514467	0.0160315	0.136	0.169667	1	0
ENSMUSG00000047675	Rps8	0.156778	0.0374785	0.0322894	0.00230732	0.195	0.162333	1	0
ENSMUSG00000036469	Marchf1	0.156932	0.15524	0.084305	0.0618066	0.616	0.585667	1	0
ENSMUSG00000020056	Washc3	0.15714	0.167413	0.0409152	0.011527	0.113	0.0853333	1	0
ENSMUSG00000005514	Por	0.157202	0.127845	0.0365828	0.0230456	0.214	0.176667	1	0
ENSMUSG00000021219	Rgs6	0.157524	0.041543	0.108563	0.00704477	0.164	0.134667	1	0
ENSMUSG00000056069	Otulinl	0.157709	0.152892	0.0454279	0.0144104	0.177	0.144	1	0
ENSMUSG00000039115	Itga9	0.157805	0.126621	-0.0533024	0.0139331	0.194	0.229333	1	0
ENSMUSG00000027011	Ube2e3	0.158249	0.171945	0.0843107	0.034078	0.301	0.266	1	0
ENSMUSG00000019927	Ube2d1	0.158323	0.146922	0.0679003	0.0274312	0.238	0.203333	1	0
ENSMUSG00000009073	Nf2	0.158333	0.0788583	0.117944	0.0106412	0.159	0.128333	1	0
ENSMUSG00000033965	Slc16a2	0.158343	0.0785312	-0.0422126	0.0111132	0.141	0.171333	1	0
ENSMUSG00000042520	Ubap2l	0.158407	0.0827592	0.0625479	0.022886	0.495	0.452	1	0
ENSMUSG00000022779	Top3b	0.15855	0.11035	0.0281903	0.0130458	0.134	0.104667	1	0	SFARI					2	0
ENSMUSG00000066892	Fbxl12	0.158576	0.112759	-0.0336516	0.0143821	0.108	0.137667	1	0
ENSMUSG00000055805	Fmnl1	0.158607	0.0870816	0.0394327	0.00333181	0.111	0.086	1	0
ENSMUSG00000031169	Porcn	0.158857	0.133875	0.0392392	0.0105653	0.172	0.139667	1	0
ENSMUSG00000031796	Cfap20	0.159243	0.170206	0.0556925	0.0318	0.23	0.193	1	0
ENSMUSG00000000378	Ccm2	0.159356	0.0339041	0.040655	0.0074946	0.26	0.223	1	0
ENSMUSG00000019943	Atp2b1	0.160036	0.0288269	-0.0473884	0.00589642	0.99	0.996333	1	0	SFARI					3	0
ENSMUSG00000025794	Rpl14	0.160396	0.0570077	0.030575	0.00971826	0.123	0.0966667	1	0
ENSMUSG00000054469	Lclat1	0.160425	0.104276	-0.0557356	0.0217787	0.238	0.275333	1	0
ENSMUSG00000020366	Mapk9	0.160483	0.163644	0.0461181	0.0161077	0.182	0.149333	1	0
ENSMUSG00000022515	Anks3	0.160614	0.096225	0.0653809	0.0139122	0.262	0.229667	1	0
ENSMUSG00000032482	Cspg5	0.160636	0.150971	0.0515956	0.0110915	0.154	0.125	1	0
ENSMUSG00000041417	Pik3r1	0.161119	0.121666	0.0340565	0.0184912	0.222	0.185	1	0
ENSMUSG00000022811	Zfp148	0.161165	0.162046	-0.0685109	0.0303226	0.551	0.586333	1	0
ENSMUSG00000047013	Fbxo41	0.161209	0.117989	0.0732942	0.0191247	0.215	0.183667	1	0
ENSMUSG00000034088	Hdlbp	0.161309	0.0629384	0.0699894	0.00652313	0.348	0.316333	1	0	SFARI;EAGLE		Limited	1.25	Discordant	1	0
ENSMUSG00000040028	Elavl1	0.161683	0.0448947	-0.0443713	0.00993609	0.147	0.177	1	0
ENSMUSG00000045098	Kmt5b	0.161867	0.0471514	0.0419602	0.0104043	0.331	0.293	1	0	SFARI;EAGLE;TADA	0	Definitive	14.05	Concordant	1	0
ENSMUSG00000037492	Zmat4	0.161912	0.115553	-0.0723529	0.0345166	0.255	0.293	1	0
ENSMUSG00000053293	Pom121	0.16202	0.0721744	0.0442692	0.00547142	0.118	0.0933333	1	0
ENSMUSG00000025235	Bbs4	0.162208	0.214869	0.0415704	0.0218657	0.152	0.119667	1	0	SFARI					2	0
ENSMUSG00000012609	Ttll5	0.162631	0.0930404	-0.0449815	0.0062417	0.114	0.141333	1	0
ENSMUSG00000087306	A230004M16Rik	0.162932	0.187208	0.0565013	0.0207818	0.18	0.147333	1	0
ENSMUSG00000037315	Jade3	0.163018	0.078706	0.0547515	0.00235627	0.175	0.146	1	0
ENSMUSG00000033102	Cdc14b	0.163077	0.163595	0.0738519	0.026171	0.171	0.135333	1	0
ENSMUSG00000028476	Reck	0.16311	0.119289	0.0471064	0.013688	0.179	0.147	1	0
ENSMUSG00000027296	Itpka	0.163447	0.104632	0.0685185	0.00453136	0.344	0.305667	1	0
ENSMUSG00000040722	Scamp5	0.16359	0.115158	0.0459738	0.00928595	0.174	0.143333	1	0
ENSMUSG00000071662	Polr2g	0.163788	0.0625473	0.0450642	0.00653794	0.113	0.0886667	1	0
ENSMUSG00000087700	Gm15283	0.163907	0.159834	0.0454712	0.00726482	0.157	0.126333	1	0
ENSMUSG00000005362	Crbn	0.16397	0.0250191	0.0372093	0.00362938	0.151	0.122667	1	0
ENSMUSG00000034432	Cops8	0.164065	0.122475	0.0401832	0.00643302	0.151	0.122	1	0
ENSMUSG00000049755	Zfp672	0.164121	0.0582904	-0.0382916	0.00728524	0.098	0.123	1	0
ENSMUSG00000032743	Katnip	0.164121	0.0773053	0.0270665	0.0101189	0.174	0.142333	1	0
ENSMUSG00000070939	Tgfbrap1	0.164772	0.153602	0.050287	0.0166364	0.109	0.0836667	1	0
ENSMUSG00000022325	Pop1	0.164782	0.0718347	0.0343135	0.00752662	0.116	0.091	1	0
ENSMUSG00000038056	Kmt2c	0.164818	0.132963	-0.064377	0.0393352	0.589	0.623	1	0	SFARI;EAGLE		Definitive	14.1	Concordant	1	1
ENSMUSG00000025544	Tm9sf2	0.164919	0.147431	0.052492	0.0314426	0.25	0.212667	1	0
ENSMUSG00000025170	Rab40b	0.165079	0.162558	0.0527272	0.0290965	0.3	0.255	1	0
ENSMUSG00000111627	Gm48749	0.165143	0.114574	0.0636226	0.0292561	0.205	0.172333	1	0
ENSMUSG00000017264	Exosc10	0.16557	0.0520877	0.0464653	0.00941405	0.177	0.148	1	0
ENSMUSG00000041220	Elovl6	0.16558	0.0872444	0.0397254	0.0134446	0.233	0.198	1	0
ENSMUSG00000018567	Gabarap	0.165767	0.0741427	0.0246284	0.00827985	0.103	0.079	1	0
ENSMUSG00000107422	Gm44129	0.165842	0.172499	-0.0320673	0.0254638	0.103	0.133	1	0
ENSMUSG00000003154	Foxj2	0.165874	0.145228	0.0416413	0.0112219	0.109	0.084	1	0
ENSMUSG00000005417	Mprip	0.165916	0.148214	0.0732912	0.0179812	0.618	0.568667	1	0
ENSMUSG00000042682	Selenok	0.166182	0.134621	0.0419311	0.0147645	0.141	0.111333	1	0
ENSMUSG00000052299	Ltn1	0.16623	0.170281	0.0538492	0.0448231	0.303	0.256667	1	0
ENSMUSG00000006711	D130043K22Rik	0.166521	0.0796008	-0.0612912	0.0153504	0.174	0.204333	1	0
ENSMUSG00000002985	Apoe	0.166674	0.182172	0.0258697	0.0171705	0.108	0.0803333	1	0
ENSMUSG00000028656	Cap1	0.166876	0.182412	-0.066911	0.0391886	0.323	0.361333	1	0
ENSMUSG00000028820	Sfpq	0.167233	0.064206	-0.0673217	0.0115888	0.689	0.713	1	0
ENSMUSG00000028894	Inpp5b	0.167292	0.0739548	-0.0472954	0.00669057	0.099	0.123667	1	0
ENSMUSG00000025280	Polr3a	0.167534	0.0478145	0.0476178	0.00426058	0.182	0.153	1	0	SFARI					3	1
ENSMUSG00000032405	Pias1	0.167669	0.071932	-0.0358897	0.0113533	0.47	0.53	1	0
ENSMUSG00000024524	Gnal	0.16801	0.165889	-0.0622698	0.027105	0.889	0.889667	1	0
ENSMUSG00000031328	Flna	0.168053	0.188432	0.0653136	0.0360306	0.283	0.237333	1	0
ENSMUSG00000100826	Snhg14	0.168093	0.221804	0.0738655	0.041408	0.988	0.991333	1	0
ENSMUSG00000042182	Bend6	0.16824	0.181336	0.0333697	0.0271323	0.108	0.0793333	1	0
ENSMUSG00000014195	Dnajc7	0.168242	0.209206	0.0478346	0.0276781	0.394	0.345	1	0
ENSMUSG00000024290	Rock1	0.16844	0.14976	-0.0714779	0.0132489	0.508	0.542667	1	0
ENSMUSG00000041078	Grid1	0.168522	0.0391909	-0.0637026	0.0109624	0.952	0.958333	1	0	SFARI					2	0
ENSMUSG00000030207	Fam234b	0.168601	0.120841	0.0384229	0.0100153	0.141	0.113	1	0
ENSMUSG00000026843	Fubp3	0.168624	0.0924376	0.0324275	0.0145284	0.233	0.197	1	0	TADA	0.0808757
ENSMUSG00000024213	Nudt3	0.168837	0.188212	0.0351136	0.0197255	0.118	0.0883333	1	0
ENSMUSG00000028785	Hpca	0.168838	0.229522	0.0658596	0.0400619	0.455	0.408667	1	0
ENSMUSG00000033720	Sfxn5	0.169032	0.0665203	0.0497254	0.00534865	0.185	0.155667	1	0
ENSMUSG00000110824	Gm48677	0.169198	0.123329	-0.0697611	0.0178039	0.338	0.376	1	0
ENSMUSG00000031590	Frg1	0.16933	0.0750577	0.029711	0.00566625	0.131	0.104	1	0	SFARI					2	0
ENSMUSG00000027091	Zc3h15	0.169561	0.0460959	0.0522696	0.0115976	0.237	0.205333	1	0
ENSMUSG00000029221	Slc30a9	0.169598	0.0533704	0.0493972	0.00378294	0.288	0.253333	1	0
ENSMUSG00000061751	Kalrn	0.169762	0.166747	-0.0565416	0.00940028	0.98	0.982667	1	0
ENSMUSG00000040651	Tasor	0.169931	0.138408	0.0581313	0.0151839	0.477	0.441667	1	0
ENSMUSG00000023286	Ube2j2	0.170062	0.144811	0.0574358	0.0144444	0.154	0.126667	1	0
ENSMUSG00000021494	Ddx41	0.170147	0.155846	0.0349291	0.0159417	0.103	0.0766667	1	0
ENSMUSG00000039542	Ncam1	0.170263	0.0926249	0.0492751	0.0246185	0.791	0.763333	1	0
ENSMUSG00000109372	Gm19410	0.170336	0.135972	-0.060623	0.0185136	0.27	0.313333	1	0
ENSMUSG00000066571	Garre1	0.17074	0.172009	-0.0531795	0.0245187	0.139	0.175333	1	0
ENSMUSG00000016200	Syt14	0.17091	0.220771	-0.0457519	0.040923	0.666	0.699	1	0
ENSMUSG00000021687	Scamp1	0.17109	0.241626	0.0831549	0.0547857	0.44	0.386333	1	0
ENSMUSG00000061665	Cd2ap	0.171514	0.232075	-0.0677864	0.0373705	0.376	0.419333	1	0
ENSMUSG00000039629	Strip2	0.17153	0.151081	0.0989336	0.0204734	0.432	0.407667	1	0
ENSMUSG00000056427	Slit3	0.171734	0.0270645	-0.0355309	0.00618089	0.96	0.962	1	0
ENSMUSG00000068742	Cry2	0.171752	0.0925323	0.0385336	0.0105746	0.242	0.205333	1	0
ENSMUSG00000004040	Stat3	0.171838	0.14208	0.0614747	0.0265313	0.141	0.111667	1	0
ENSMUSG00000022636	Alcam	0.172574	0.061348	-0.0762207	0.00603012	0.985	0.981	1	0
ENSMUSG00000094410	Zbed6	0.172639	0.244658	-0.0538311	0.0293763	0.179	0.218	1	0
ENSMUSG00000020790	Ankfy1	0.172798	0.114447	-0.0487087	0.018397	0.238	0.277	1	0
ENSMUSG00000084954	Gm16351	0.172811	0.272751	0.0704586	0.037479	0.298	0.247667	1	0
ENSMUSG00000000826	Dnajc5	0.173014	0.130512	0.0590409	0.0310788	0.26	0.224333	1	0
ENSMUSG00000031667	Aktip	0.173097	0.0950104	0.0344123	0.0138576	0.154	0.125667	1	0
ENSMUSG00000021007	Spata7	0.173269	0.182773	0.0884812	0.0283319	0.185	0.155	1	0
ENSMUSG00000037720	Tmem33	0.173433	0.12072	0.0354253	0.00557521	0.146	0.117667	1	0
ENSMUSG00000020160	Meis1	0.173818	0.113174	-0.0503093	0.013155	0.21	0.246667	1	0
ENSMUSG00000042605	Atxn2	0.173861	0.102166	-0.0681778	0.0210408	0.421	0.449	1	0
ENSMUSG00000014039	Prdm15	0.173984	0.122507	0.0173866	0.0159501	0.146	0.116	1	0
ENSMUSG00000048154	Kmt2d	0.174078	0.206793	0.0514115	0.0271156	0.177	0.144	1	0
ENSMUSG00000106967	Gm42477	0.174304	0.113627	0.0410393	0.0129573	0.121	0.096	1	0
ENSMUSG00000042390	Gatad2b	0.17432	0.121285	0.0609396	0.0112112	0.47	0.431667	1	0
ENSMUSG00000027193	Api5	0.174415	0.201366	0.0388262	0.011817	0.126	0.0976667	1	0
ENSMUSG00000021719	Rgs7bp	0.174902	0.173741	-0.0842135	0.0237204	0.843	0.845333	1	0
ENSMUSG00000032913	Lrig2	0.174906	0.115741	0.0540095	0.0206552	0.303	0.265	1	0
ENSMUSG00000015709	Arnt2	0.17494	0.116469	-0.0930402	0.0173209	0.215	0.242667	1	0	SFARI					2	0
ENSMUSG00000007656	Arpp19	0.174963	0.111313	0.0624493	0.025816	0.609	0.563	1	0
ENSMUSG00000026764	Kif5c	0.175186	0.129259	0.0671706	0.0282417	0.512	0.464333	1	0	SFARI;TADA	0.017695				2	1
ENSMUSG00000029919	Hpgds	0.175301	0.0614393	0.0446103	0.0100153	0.129	0.103667	1	0
ENSMUSG00000035171	1110059E24Rik	0.175373	0.107105	0.024527	0.0163473	0.111	0.086	1	0
ENSMUSG00000004151	Etv1	0.175744	0.0368783	-0.0595933	0.00986777	0.149	0.175333	1	0
ENSMUSG00000033701	Acbd6	0.175884	0.141921	-0.0747889	0.0305127	0.346	0.382	1	0
ENSMUSG00000039117	Taf4	0.17614	0.132528	0.043269	0.0120964	0.144	0.115667	1	0	SFARI						1
ENSMUSG00000029516	Cit	0.176362	0.1843	0.0633847	0.0223872	0.664	0.613	1	0
ENSMUSG00000021952	Xpo4	0.176746	0.113501	0.0394387	0.0149746	0.217	0.183	1	0
ENSMUSG00000040813	Tex264	0.177327	0.126488	0.0402887	0.00702502	0.111	0.087	1	0
ENSMUSG00000085944	1700003D09Rik	0.177451	0.0728495	-0.0560314	0.0113608	0.108	0.131667	1	0
ENSMUSG00000027207	Galk2	0.177457	0.147976	0.0436818	0.0185762	0.116	0.089	1	0
ENSMUSG00000110741	Gm48091	0.177538	0.115093	0.0448609	0.0109731	0.152	0.124667	1	0
ENSMUSG00000020458	Rtn4	0.177768	0.235869	0.0609691	0.0404736	0.654	0.599333	1	0
ENSMUSG00000020776	Fbf1	0.177779	0.0447759	0.0500011	0.00538856	0.179	0.150667	1	0
ENSMUSG00000001156	Mxd1	0.177782	0.144482	0.0401152	0.0087877	0.113	0.0876667	1	0
ENSMUSG00000029432	Nipsnap2	0.178011	0.0259184	0.0214236	0.00768847	0.26	0.222333	1	0
ENSMUSG00000020230	Prmt2	0.178422	0.200274	0.0505698	0.0139567	0.104	0.0803333	1	0
ENSMUSG00000038324	Trpc4ap	0.178502	0.136001	0.0508777	0.0252521	0.291	0.251667	1	0
ENSMUSG00000051375	Pcdh1	0.178651	0.224188	0.03769	0.014111	0.108	0.081	1	0
ENSMUSG00000040594	Ranbp17	0.178663	0.0970445	-0.0599181	0.0187355	0.328	0.364667	1	0	SFARI					2	0
ENSMUSG00000013736	Trnt1	0.178828	0.119969	-0.0213771	0.0110651	0.089	0.115	1	0
ENSMUSG00000022415	Syngr1	0.178969	0.196543	0.0502744	0.0174237	0.123	0.0953333	1	0
ENSMUSG00000043857	Mgat5b	0.179192	0.177941	0.0458125	0.0232733	0.27	0.231333	1	0
ENSMUSG00000044991	Shld1	0.179473	0.13497	0.0351895	0.0104697	0.151	0.122	1	0
ENSMUSG00000070003	Ssbp4	0.179493	0.240704	0.0584708	0.0211436	0.169	0.136333	1	0
ENSMUSG00000026933	Camsap1	0.179727	0.222419	0.0581075	0.0274553	0.288	0.25	1	0
ENSMUSG00000005501	Usp40	0.180128	0.0934564	-0.0592323	0.0130637	0.22	0.251333	1	0
ENSMUSG00000044791	Setd2	0.180841	0.168079	0.0769863	0.0272153	0.469	0.432	1	0	SFARI					1	0
ENSMUSG00000056476	Med12l	0.18094	0.177666	-0.08044	0.0198935	0.497	0.523	1	0	SFARI					2	1
ENSMUSG00000037808	Fam76b	0.180941	0.102138	0.0720303	0.00707055	0.189	0.16	1	0
ENSMUSG00000020823	Sec14l1	0.181238	0.103463	0.0606433	0.0173459	0.488	0.446333	1	0
ENSMUSG00000053025	Sv2b	0.181409	0.210877	-0.0426088	0.0220495	0.389	0.436667	1	0
ENSMUSG00000030905	Crym	0.181453	0.229668	0.0769587	0.0120146	0.137	0.109333	1	0
ENSMUSG00000036167	Pphln1	0.181514	0.140453	-0.0336754	0.0178328	0.103	0.129333	1	0
ENSMUSG00000037416	Dmxl1	0.181682	0.0618921	-0.0727896	0.0114466	0.671	0.668333	1	0
ENSMUSG00000035258	Abi3bp	0.182446	0.181243	0.0627063	0.0223196	0.144	0.114667	1	0
ENSMUSG00000052852	Reep1	0.182648	0.0845583	0.0427952	0.00611495	0.439	0.398333	1	0
ENSMUSG00000016534	Lamp2	0.182732	0.134341	-0.0551871	0.0186138	0.164	0.194667	1	0
ENSMUSG00000034940	Synrg	0.183174	0.0614854	0.063193	0.00873912	0.232	0.202667	1	0
ENSMUSG00000019054	Fis1	0.183336	0.0219766	0.0318635	0.00321047	0.146	0.119333	1	0
ENSMUSG00000004031	Brinp2	0.183361	0.137991	0.0391481	0.0161925	0.303	0.26	1	0
ENSMUSG00000024097	Srsf7	0.183463	0.0830838	0.0500442	0.0163714	0.495	0.458	1	0
ENSMUSG00000019966	Kitl	0.18374	0.053196	0.0232396	0.0103861	0.149	0.121333	1	0
ENSMUSG00000117284	Gm7072	0.183996	0.218891	0.0446543	0.0236884	0.129	0.0986667	1	0
ENSMUSG00000060487	Samd5	0.184814	0.132147	-0.0626397	0.0262351	0.377	0.417	1	0
ENSMUSG00000040385	Ppp1ca	0.185019	0.150966	0.0469387	0.0110088	0.228	0.194333	1	0
ENSMUSG00000029093	Sorcs2	0.185124	0.120977	-0.0634808	0.032944	0.578	0.607	1	0
ENSMUSG00000040794	C1qtnf4	0.185186	0.253839	0.0963115	0.028677	0.474	0.440333	1	0
ENSMUSG00000018820	Zfyve27	0.185542	0.203944	0.0334526	0.0257212	0.106	0.0773333	1	0
ENSMUSG00000025427	Rnf165	0.185606	0.124299	0.0554238	0.0161357	0.253	0.22	1	0
ENSMUSG00000067889	Sptbn2	0.185623	0.283749	0.100202	0.0342832	0.487	0.445333	1	0
ENSMUSG00000015961	Adss	0.186251	0.170355	0.0600811	0.0194626	0.267	0.232333	1	0	SFARI					2	0
ENSMUSG00000032547	Ryk	0.186255	0.0670591	-0.0529512	0.00390985	0.192	0.223	1	0
ENSMUSG00000048915	Efna5	0.186565	0.0347901	-0.0428598	0.0214799	0.417	0.456667	1	0
ENSMUSG00000049100	Pcdh10	0.186799	0.173944	0.0943624	0.0500941	0.472	0.429667	1	0	SFARI					2	0
ENSMUSG00000039206	Daglb	0.186958	0.146542	0.0304037	0.011419	0.103	0.0783333	1	0
ENSMUSG00000059474	Mbtd1	0.187219	0.152017	-0.0602519	0.023855	0.52	0.550333	1	0
ENSMUSG00000084957	Bbip1	0.187317	0.138817	-0.0356287	0.0179079	0.192	0.226333	1	0
ENSMUSG00000018481	Appbp2	0.187459	0.142802	-0.055095	0.00556406	0.227	0.259333	1	0
ENSMUSG00000032112	Trappc4	0.187479	0.104911	0.0415725	0.00983581	0.111	0.0876667	1	0
ENSMUSG00000020454	Eif4enif1	0.187485	0.063109	0.0440213	0.00315015	0.169	0.140667	1	0
ENSMUSG00000039199	Zdhhc1	0.187601	0.205729	0.0340015	0.0229773	0.111	0.0826667	1	0
ENSMUSG00000020135	Apc2	0.187684	0.228487	0.0378956	0.0244507	0.103	0.0753333	1	0
ENSMUSG00000027520	Zdbf2	0.187801	0.0890255	0.0661496	0.0313004	0.3	0.267667	1	0
ENSMUSG00000034893	Cog3	0.188049	0.222943	0.0426185	0.0281296	0.222	0.185667	1	0
ENSMUSG00000030751	Psma1	0.188311	0.115361	0.0435349	0.0151651	0.195	0.163333	1	0
ENSMUSG00000028986	Klhl7	0.188508	0.288462	0.119334	0.0633682	0.561	0.507667	1	0
ENSMUSG00000021111	Papola	0.188566	0.0859276	0.0660202	0.0157178	0.618	0.58	1	0
ENSMUSG00000021209	Ppp4r4	0.188794	0.303008	-0.0999385	0.0420394	0.611	0.637	1	0
ENSMUSG00000116564	Riok2	0.188929	0.147697	0.0329402	0.0156787	0.154	0.123333	1	0
ENSMUSG00000019984	Med23	0.189153	0.127291	0.0484444	0.0232418	0.222	0.189	1	0	SFARI					2	0
ENSMUSG00000027763	Mbnl1	0.189243	0.22382	-0.0830268	0.0342614	0.752	0.782333	1	0
ENSMUSG00000008200	Fnbp4	0.189418	0.141292	-0.0558757	0.0323245	0.301	0.335	1	0
ENSMUSG00000040652	Oaz2	0.189954	0.103079	0.0532164	0.0125574	0.131	0.106333	1	0
ENSMUSG00000099150	Gm27243	0.190061	0.267167	0.0468955	0.0193154	0.162	0.13	1	0
ENSMUSG00000021877	Arf4	0.190099	0.177749	0.0441027	0.0268256	0.237	0.203667	1	0
ENSMUSG00000028354	Fmn2	0.190584	0.168096	-0.0795617	0.0165939	0.584	0.615	1	0
ENSMUSG00000037197	Rbm17	0.190786	0.0657157	0.0397136	0.00763065	0.141	0.116	1	0
ENSMUSG00000024145	Pigf	0.190975	0.0972144	0.0385519	0.00943978	0.116	0.0926667	1	0
ENSMUSG00000031666	Rbl2	0.191104	0.095354	-0.0577302	0.0164119	0.19	0.221333	1	0
ENSMUSG00000061477	Rps7	0.191239	0.180049	0.0488567	0.0318773	0.131	0.0976667	1	0
ENSMUSG00000044949	Ubtd2	0.191246	0.147217	0.0485255	0.0234954	0.23	0.197667	1	0
ENSMUSG00000033972	Zfp944	0.191426	0.172062	0.0420852	0.0140074	0.147	0.119333	1	0
ENSMUSG00000005625	Psmd4	0.191738	0.143206	0.0332383	0.013188	0.174	0.143333	1	0
ENSMUSG00000042078	Svop	0.191771	0.1456	0.0684244	0.0212841	0.298	0.264667	1	0
ENSMUSG00000033319	Fem1c	0.191778	0.251932	-0.0608579	0.0203299	0.106	0.134667	1	0
ENSMUSG00000025227	Mfsd13a	0.192066	0.0624687	0.0465458	0.00372681	0.123	0.0993333	1	0
ENSMUSG00000021264	Yy1	0.192149	0.272047	0.0525559	0.0318148	0.177	0.142333	1	0	SFARI					1	1
ENSMUSG00000029270	Dipk1a	0.192298	0.127237	0.0659166	0.018479	0.262	0.229333	1	0
ENSMUSG00000005078	Jkamp	0.192393	0.100889	0.0473544	0.0108935	0.21	0.180667	1	0
ENSMUSG00000029581	Fscn1	0.192489	0.105683	0.0490297	0.0145679	0.131	0.106333	1	0
ENSMUSG00000028549	Itgb3bp	0.192571	0.15351	0.0584364	0.0124708	0.157	0.127667	1	0
ENSMUSG00000028047	Thbs3	0.192636	0.129615	0.0129745	0.0360175	0.124	0.111333	1	0
ENSMUSG00000079215	Zfp664	0.192885	0.0815041	0.0442101	0.00431568	0.164	0.136667	1	0
ENSMUSG00000024236	Svil	0.193583	0.108743	0.0532927	0.0167151	0.214	0.183	1	0
ENSMUSG00000009739	Pou6f1	0.193946	0.0597545	0.048735	0.0111882	0.172	0.145667	1	0
ENSMUSG00000038271	Iffo1	0.194265	0.266148	0.0407678	0.0233057	0.136	0.106	1	0
ENSMUSG00000068747	Sort1	0.194293	0.129214	0.0262394	0.0234387	0.358	0.313	1	0
ENSMUSG00000032267	Usp28	0.194528	0.146857	-0.0722144	0.0213395	0.291	0.321	1	0
ENSMUSG00000073565	Prr16	0.19462	0.183195	0.0519112	0.0269366	0.242	0.206333	1	0
ENSMUSG00000086171	Pcsk2os1	0.194785	0.155338	0.0432814	0.0190613	0.113	0.087	1	0
ENSMUSG00000025159	Mms19	0.194871	0.151717	0.04474	0.0100448	0.132	0.107	1	0
ENSMUSG00000020124	Usp15	0.194971	0.0979738	-0.0678359	0.0213856	0.475	0.504	1	0	SFARI					2	0
ENSMUSG00000086708	Gm15577	0.195163	0.186316	0.0437103	0.0217032	0.189	0.158	1	0
ENSMUSG00000029068	Ccnl2	0.195372	0.21921	0.0357841	0.0446555	0.374	0.322667	1	0
ENSMUSG00000050608	Micos10	0.195391	0.035804	0.0476349	0.00403552	0.184	0.157	1	0
ENSMUSG00000051451	Crebzf	0.195451	0.131072	-0.0533707	0.0186458	0.182	0.213	1	0
ENSMUSG00000074733	Zfp950	0.195455	0.246769	-0.0586256	0.0372651	0.51	0.556333	1	0
ENSMUSG00000028843	Sh3bgrl3	0.195604	0.149954	0.0431136	0.0101495	0.126	0.100667	1	0
ENSMUSG00000097546	Gm26749	0.195797	0.14226	-0.0452988	0.0163315	0.267	0.306	1	0
ENSMUSG00000019977	Hbs1l	0.195814	0.150716	0.0376825	0.0300475	0.296	0.256333	1	0
ENSMUSG00000039480	Nt5dc1	0.19586	0.125267	0.0169516	0.0110814	0.123	0.0966667	1	0
ENSMUSG00000006307	Kmt2b	0.195966	0.0774429	0.0368737	0.00542367	0.126	0.102333	1	0
ENSMUSG00000046449	Nexmif	0.195979	0.0886782	0.021717	0.0193872	0.235	0.200333	1	0	SFARI					1	0
ENSMUSG00000032328	Tmem30a	0.19635	0.314681	-0.0679256	0.0413128	0.159	0.198333	1	0
ENSMUSG00000058793	Cds2	0.196466	0.131938	0.0298273	0.00659542	0.169	0.14	1	0
ENSMUSG00000085334	Gm12940	0.196966	0.116167	0.0558121	0.0115577	0.247	0.215333	1	0
ENSMUSG00000028945	Rheb	0.197063	0.12129	0.0772156	0.0143674	0.222	0.193	1	0	SFARI						1
ENSMUSG00000026361	Cdc73	0.197318	0.151313	-0.0811092	0.0181226	0.325	0.349	1	0
ENSMUSG00000020044	Timp3	0.197335	0.162504	0.0366691	0.0121391	0.111	0.0876667	1	0
ENSMUSG00000036278	Macrod1	0.197344	0.143178	0.0339868	0.0176822	0.139	0.111333	1	0
ENSMUSG00000038884	Shfl	0.197912	0.208539	0.0764422	0.0205698	0.235	0.204667	1	0
ENSMUSG00000025499	Hras	0.197943	0.208457	0.0532163	0.0244107	0.179	0.149333	1	0	SFARI					1	0
[truncated: 3,672 more rows]

## Sheet: Ecc_MSN
ensembl	gene	p_val.mean	p_val.std	avg_log2FC.mean	avg_log2FC.std	pct.1.mean	pct.2.mean	padj.mean	padj.std	ASD.status	TADA.FDR	EAGLE.annotation	EAGLE.score	EAGLE.concordance	SFARI.score	SFARI.syndromic
ENSMUSG00000007783	Cpt1c	1.52059e-08	2.10504e-08	0.553805	0.053717	0.595	0.293	0.000435741	0.000603222
ENSMUSG00000020719	Ddx5	3.23712e-07	2.46067e-07	0.471752	0.0186679	0.953	0.915667	0.0092763	0.0070513
ENSMUSG00000063511	Snrnp70	1.3956e-06	1.49755e-06	0.429716	0.0182031	0.821	0.731667	0.0399924	0.0429138
ENSMUSG00000019039	Dalrd3	1.81825e-06	1.24786e-06	0.524236	0.0207296	0.542	0.321333	0.0521038	0.0357587
ENSMUSG00000041216	Clvs1	1.18559e-05	1.24658e-05	-0.43451	0.0333026	0.411	0.628	0.339743	0.357219
ENSMUSG00000056427	Slit3	2.88065e-05	2.67752e-05	-0.532426	0.0514759	0.568	0.701333	0.636801	0.525661
ENSMUSG00000044667	Plppr4	3.71978e-05	4.45792e-05	0.483124	0.0587211	0.732	0.594667	0.569626	0.502124
ENSMUSG00000040907	Atp1a3	4.18612e-05	5.32964e-05	0.391158	0.0313282	0.647	0.477	0.554817	0.473596	SFARI					2	1
ENSMUSG00000001270	Ckb	5.74368e-05	6.53233e-05	0.466392	0.0855732	0.732	0.549333	0.67149	0.568996
ENSMUSG00000026204	Ptprn	6.68417e-05	6.90321e-05	0.563327	0.0331638	0.653	0.529667	0.736082	0.457119
ENSMUSG00000032238	Rora	7.75934e-05	2.42547e-05	-0.384706	0.00875664	0.968	0.963333	1	0	SFARI						1
ENSMUSG00000040938	Slc16a11	0.000146885	9.75287e-05	0.253834	0.00397586	0.216	0.079	1	0
ENSMUSG00000079157	Nalf1	0.000204297	0.000121513	-0.329446	0.0056858	0.953	0.979	1	0
ENSMUSG00000031605	Klhl2	0.00020573	0.000277679	-0.365868	0.0677423	0.295	0.475333	0.904681	0.165097
ENSMUSG00000019990	Pde7b	0.00025282	0.00025099	-0.387162	0.04913	0.737	0.877333	0.898609	0.175614
ENSMUSG00000028519	Dab1	0.000289242	0.000228249	-0.36667	0.0174745	0.9	0.944	0.931593	0.118484
ENSMUSG00000028399	Ptprd	0.000374888	0.000113676	-0.512498	0.0747003	0.889	0.921333	1	0
ENSMUSG00000029712	Actl6b	0.000377564	0.000315284	0.287292	0.0290073	0.268	0.121	0.984965	0.0260422	SFARI						1
ENSMUSG00000013236	Ptprs	0.000391997	0.000525339	0.383446	0.0481833	0.632	0.47	0.946792	0.0921592
ENSMUSG00000062257	Opcml	0.000430646	0.000408216	-0.28049	0.0397585	1	0.998333	0.943714	0.0974905
ENSMUSG00000017740	Slc12a5	0.000537098	0.000790515	0.270351	0.0443178	0.358	0.189667	1	0	SFARI					2	0
ENSMUSG00000060988	Galnt13	0.000641772	0.000334817	-0.339081	0.00885101	0.884	0.961333	1	0	SFARI					2	0
ENSMUSG00000039474	Wfs1	0.000811677	0.000605164	0.316174	0.0217907	0.237	0.109	1	0
ENSMUSG00000036333	Kidins220	0.000834618	0.000837527	0.68482	0.033399	0.716	0.652333	1	0
ENSMUSG00000020048	Hsp90b1	0.000873276	0.000234124	0.248904	0.0231136	0.316	0.17	1	0
ENSMUSG00000058740	Kcnt1	0.000906695	0.00105604	0.351232	0.0599289	0.521	0.379	0.864389	0.234886
ENSMUSG00000019978	Epb41l2	0.000963268	0.000795916	-0.148183	0.0367918	0.042	0.149333	1	0
ENSMUSG00000051177	Plcb1	0.00116185	0.0012183	-0.239496	0.0330558	1	1	1	0	SFARI					2	0
ENSMUSG00000033740	St18	0.00122183	0.00114595	-0.48902	0.149812	0.026	0.110667	1	0
ENSMUSG00000026576	Atp1b1	0.00124324	0.00172598	0.395893	0.0259776	0.763	0.677	1	0
ENSMUSG00000068373	D430041D05Rik	0.00136068	0.00140715	-0.274341	0.0563279	0.411	0.589333	0.907626	0.159996
ENSMUSG00000017491	Rarb	0.00144073	0.000953054	-0.357845	0.0470072	0.637	0.731667	1	0
ENSMUSG00000032698	Lmo2	0.00150927	0.000426365	-0.135006	0.0153542	0.032	0.117667	1	0
ENSMUSG00000026159	Agfg1	0.00161355	0.000987191	-0.238782	0.012994	0.195	0.335	1	0
ENSMUSG00000036766	Dner	0.00167709	0.00209487	0.277738	0.0550905	0.253	0.119667	1	0	SFARI					2	0
ENSMUSG00000028161	Ppp3ca	0.00170873	0.00255762	-0.247272	0.0408635	0.995	1	1	0	SFARI					3	1
ENSMUSG00000004207	Psap	0.00175517	0.00161141	0.348897	0.0317653	0.432	0.296667	1	0
ENSMUSG00000038143	Stox2	0.00177814	0.00135812	-0.232423	0.0455534	0.7	0.851	1	0
ENSMUSG00000071528	Atp5md	0.0018205	0.00189733	0.194693	0.0170802	0.205	0.0893333	1	0
ENSMUSG00000045573	Penk	0.00187821	0.000900683	0.430262	0.0365746	0.516	0.401667	1	0
ENSMUSG00000064293	Cntn4	0.00193267	0.00157341	-0.324477	0.0502798	0.695	0.789333	1	0	SFARI					2	0
ENSMUSG00000024121	Atp6v0c	0.00208333	0.00240061	0.35251	0.0502739	0.495	0.377	1	0
ENSMUSG00000044499	Hs3st5	0.00222551	0.00298179	-0.266086	0.102538	0.247	0.431667	0.724697	0.476839	SFARI					2	0
ENSMUSG00000056073	Grik2	0.00226731	0.00204821	-0.259812	0.0464832	1	0.994667	1	0	SFARI					2	0
ENSMUSG00000027649	Ctnnbl1	0.00231454	0.00244202	0.209605	0.0200224	0.242	0.119667	1	0
ENSMUSG00000022892	App	0.00232328	0.00133027	0.231451	0.0232654	0.916	0.854333	1	0
ENSMUSG00000032936	Camkv	0.00248169	0.00255001	0.379951	0.0429337	0.574	0.454333	1	0
ENSMUSG00000043531	Sorcs1	0.0026128	0.00271619	-0.340568	0.0544586	0.716	0.836667	1	0	EAGLE		Limited	0.25	Discordant
ENSMUSG00000032009	Sesn3	0.00264079	0.000268949	-0.254105	0.0223316	0.332	0.482333	1	0
ENSMUSG00000044340	Phlpp1	0.002796	0.00274167	-0.284766	0.0302497	0.295	0.444	1	0
ENSMUSG00000035530	Eif1	0.00280388	0.00449294	0.275945	0.0416247	0.3	0.166667	1	0
ENSMUSG00000041078	Grid1	0.00293968	0.00480008	-0.269223	0.0440116	0.911	0.97	1	0	SFARI					2	0
ENSMUSG00000061533	Cep128	0.00306939	0.00265208	-0.129366	0.0147427	0.053	0.149	1	0
ENSMUSG00000004631	Sgce	0.00308134	0.00368799	-0.21856	0.0324349	0.147	0.280667	1	0
ENSMUSG00000020189	Osbpl8	0.00311624	0.0021456	-0.324406	0.052027	0.847	0.898333	1	0
ENSMUSG00000021493	Pdlim7	0.00311744	0.00347581	0.272882	0.0195854	0.268	0.149	1	0
ENSMUSG00000031708	Tecr	0.00320011	0.00508772	0.31979	0.0942393	0.447	0.284333	0.704945	0.511051
ENSMUSG00000030695	Aldoa	0.00327848	0.00347961	0.291061	0.0521049	0.311	0.180333	1	0
ENSMUSG00000022240	Ctnnd2	0.00331813	0.00364167	-0.262504	0.0224356	0.916	0.963	1	0	SFARI					2	0
ENSMUSG00000006930	Hap1	0.00338406	0.00286907	0.243822	0.0350954	0.347	0.216	1	0
ENSMUSG00000031618	Nr3c2	0.00351576	0.00419008	-0.280607	0.0513985	0.442	0.605333	1	0	SFARI					1	1
ENSMUSG00000026155	Smap1	0.00366002	0.00539516	-0.200556	0.0591087	0.132	0.266667	1	0
ENSMUSG00000061518	Cox5b	0.00368381	0.00330911	0.217991	0.0138327	0.216	0.105333	1	0
ENSMUSG00000062991	Nrg1	0.00368758	0.00523022	-0.345735	0.0967587	0.947	0.963	1	0
ENSMUSG00000045441	Gprin3	0.00371922	0.00533815	-0.353718	0.0455357	0.505	0.628	1	0
ENSMUSG00000069670	Nkain2	0.00388392	0.00351973	-0.196311	0.0458967	1	1	1	0
ENSMUSG00000007617	Homer1	0.00391874	0.00483309	-0.141697	0.0532811	0.674	0.782667	1	0	SFARI					2	0
ENSMUSG00000033161	Atp1a1	0.003922	0.00485486	0.3675	0.0419485	0.442	0.321333	1	0	SFARI					2	1
ENSMUSG00000029534	St7	0.00392967	0.00471887	-0.328159	0.0299451	0.4	0.529667	1	0	SFARI					2	0
ENSMUSG00000031425	Plp1	0.00393842	0.00629771	-0.688445	0.189343	0.068	0.175	1	0
ENSMUSG00000040003	Magi2	0.00398382	0.0033677	-0.266168	0.0305983	0.984	0.977333	1	0
ENSMUSG00000045349	Sh2d5	0.00402737	0.002425	0.220049	0.00948156	0.3	0.177	1	0
ENSMUSG00000022377	Asap1	0.00406498	0.000580741	-0.270423	0.0312	0.232	0.359667	1	0
ENSMUSG00000031974	Abcb10	0.00419053	0.00322765	0.261973	0.0137693	0.211	0.103333	1	0
ENSMUSG00000022577	Ly6h	0.00422643	0.00490691	0.314166	0.0865326	0.532	0.408667	1	0
ENSMUSG00000022307	Oxr1	0.00423645	0.00451532	-0.288068	0.0572355	0.468	0.605333	1	0
ENSMUSG00000064302	Clasp1	0.00446788	0.00194604	-0.219139	0.0153996	0.237	0.375333	1	0	SFARI					2	0
ENSMUSG00000070858	Gm1673	0.00446943	0.00228678	0.104455	0.00426057	0.1	0.028	1	0
ENSMUSG00000026864	Hspa5	0.00486222	0.00639276	0.220038	0.0374821	0.289	0.161333	1	0
ENSMUSG00000061911	Myt1l	0.00497377	0.0032622	-0.210086	0.0273733	0.984	0.989333	1	0	SFARI;EAGLE;TADA	7.02e-08	Definitive	20.35	Concordant	1	0
ENSMUSG00000022197	Pdzd2	0.00499803	0.00285195	-0.305962	0.0219931	0.205	0.314	1	0
ENSMUSG00000029328	Hnrnpdl	0.00502169	0.00502369	0.274408	0.0335809	0.558	0.433333	1	0
ENSMUSG00000026223	Itm2c	0.00505159	0.00500299	0.342365	0.0490158	0.526	0.398	1	0
ENSMUSG00000031537	Ikbkb	0.00506704	0.00326379	0.154669	0.0109876	0.137	0.0526667	1	0
ENSMUSG00000039419	Cntnap2	0.00507686	0.00321724	-0.334103	0.0318141	0.984	0.984	1	0	SFARI;EAGLE		Refuted	—	Discordant	2	1
ENSMUSG00000039278	Pcsk1n	0.00525324	0.00339894	0.309836	0.0504433	0.489	0.354333	1	0
ENSMUSG00000032939	Nup93	0.00545547	0.00341297	-0.220088	0.034514	0.337	0.487667	1	0
ENSMUSG00000020121	Srgap1	0.0056114	0.0045246	-0.27601	0.0246044	0.426	0.573667	1	0
ENSMUSG00000028782	Adgrb2	0.00569383	0.00425239	0.166573	0.0320166	0.242	0.126667	1	0
ENSMUSG00000047773	Ankfn1	0.00574744	0.00412266	-0.278339	0.041443	0.321	0.454	1	0
ENSMUSG00000028081	Rps3a1	0.00580912	0.00509842	0.162851	0.0108333	0.147	0.0596667	1	0
ENSMUSG00000055254	Ntrk2	0.00590871	0.00565799	-0.105807	0.0381155	0.763	0.877	1	0	SFARI						1
ENSMUSG00000004267	Eno2	0.00592068	0.00456603	0.226142	0.00855599	0.374	0.244	1	0
ENSMUSG00000063600	Egfem1	0.00601186	0.00397437	-0.401094	0.0205351	0.395	0.538667	1	0
ENSMUSG00000043388	Tmem130	0.0060931	0.00205475	0.220006	0.0132236	0.253	0.142	1	0
ENSMUSG00000060924	Csmd1	0.00609749	0.00633217	-0.24005	0.0295866	1	1	1	0	SFARI					2	0
ENSMUSG00000096914	Galntl6	0.00616102	0.00127389	-0.329778	0.0119159	0.916	0.965	1	0
ENSMUSG00000015476	Prrt1	0.00640437	0.00508831	0.203638	0.0308211	0.242	0.131667	1	0
ENSMUSG00000039539	Sgcz	0.00657005	0.00189019	-0.265426	0.0259827	0.937	0.959667	1	0
ENSMUSG00000027134	Lpcat4	0.00669192	0.00342422	0.159156	0.0105734	0.184	0.0893333	1	0
ENSMUSG00000052707	Tnrc6a	0.00704302	0.00228506	0.24717	0.0182403	0.411	0.3	1	0
ENSMUSG00000037996	Slc24a2	0.00706216	0.00556782	-0.32795	0.0748232	0.653	0.763	1	0	SFARI					2	0
ENSMUSG00000051401	Kctd16	0.00708279	0.00862417	-0.314134	0.0566508	0.942	0.980333	1	0
ENSMUSG00000043432	Leng9	0.00720477	0.00568195	0.232126	0.0203272	0.258	0.147667	1	0
ENSMUSG00000058152	Chsy3	0.00750196	0.0100923	-0.269017	0.0440678	0.584	0.712	1	0
ENSMUSG00000057230	Aak1	0.00758512	0.00567313	-0.229447	0.0455938	0.542	0.665	1	0
ENSMUSG00000059921	Unc5c	0.00781641	0.00510992	-0.414989	0.0145244	0.416	0.540333	1	0
ENSMUSG00000026959	Grin1	0.00789345	0.00645091	0.301335	0.0349777	0.805	0.756333	1	0	SFARI					1	0
ENSMUSG00000041380	Htr2c	0.00838066	0.00892276	-0.311009	0.077381	0.084	0.182667	1	0
ENSMUSG00000021779	Thrb	0.00842449	0.0137961	-0.295826	0.0677266	0.437	0.598333	1	0
ENSMUSG00000060961	Slc4a4	0.00894791	0.00336681	-0.176504	0.0214196	0.721	0.809	1	0
ENSMUSG00000001983	Taco1	0.00899852	0.00536875	0.183123	0.0218954	0.284	0.170333	1	0
ENSMUSG00000057440	Mpp7	0.00907937	0.00369601	-0.18501	0.00319747	0.137	0.242333	1	0
ENSMUSG00000027620	Rbm39	0.0091107	0.00702674	0.195243	0.0417286	0.879	0.850667	1	0
ENSMUSG00000053930	Shisa6	0.00914123	0.0102194	0.287923	0.0338731	0.147	0.0613333	1	0
ENSMUSG00000035681	Kcnc2	0.00919126	0.0079226	0.415018	0.117501	0.568	0.431333	1	0	SFARI					3	0
ENSMUSG00000049076	Acap2	0.0094014	0.00638157	-0.259518	0.0182765	0.495	0.6	1	0
ENSMUSG00000057329	Bcl2	0.00973101	0.0143368	-0.256346	0.0251132	0.142	0.250667	1	0
ENSMUSG00000027827	Kcnab1	0.00985405	0.0136157	-0.327161	0.0263693	0.784	0.873667	1	0
ENSMUSG00000050783	Htr1f	0.00993956	0.00914817	0.293047	0.124733	0.389	0.245667	1	0
ENSMUSG00000018379	Srsf1	0.00997394	0.00797071	0.198659	0.0439955	0.4	0.286	1	0
ENSMUSG00000038252	Ncapd2	0.0103866	0.00876252	0.131525	0.0179374	0.142	0.0593333	1	0
ENSMUSG00000037624	Kcnk2	0.0104284	0.00446966	-0.282191	0.022381	0.358	0.482667	1	0
ENSMUSG00000113216	Gm40841	0.0108026	0.0078802	-0.273321	0.0124208	0.363	0.481	1	0
ENSMUSG00000015656	Hspa8	0.0108313	0.00977013	0.211097	0.0848237	0.363	0.214	1	0
ENSMUSG00000028351	Brinp1	0.0109336	0.0137123	-0.322069	0.0806748	0.7	0.759667	1	0
ENSMUSG00000026575	Nme7	0.0110122	0.0117348	0.258903	0.0659046	0.405	0.289667	1	0
ENSMUSG00000090086	AI480526	0.0111951	0.0120648	0.172968	0.0203258	0.205	0.105	1	0
ENSMUSG00000024736	Tmem132a	0.011215	0.00751022	0.2158	0.0176429	0.205	0.112333	1	0
ENSMUSG00000037196	Pacrg	0.0112791	0.0138711	-0.20179	0.0352945	0.132	0.244	1	0
ENSMUSG00000030310	Slc6a1	0.0113001	0.00802056	0.233513	0.0313279	0.326	0.217333	1	0	SFARI;EAGLE;TADA	5.91e-10	Definitive	31.15	Concordant	1	1
ENSMUSG00000024642	Tle4	0.0114124	0.010464	-0.287281	0.037704	0.389	0.514	1	0
ENSMUSG00000047976	Kcna1	0.0119696	0.00493382	0.206601	0.0255007	0.363	0.254667	1	0
ENSMUSG00000059974	Ntm	0.0119786	0.0063538	-0.246937	0.0270925	0.932	0.97	1	0
ENSMUSG00000038872	Zfhx3	0.0120363	0.00618289	-0.148518	0.0184185	0.053	0.128333	1	0
ENSMUSG00000032560	Dnajc13	0.0120537	0.0119974	-0.226987	0.0523942	0.179	0.296667	1	0
ENSMUSG00000024135	Srbd1	0.0120744	0.0191797	-0.180692	0.0337926	0.121	0.238333	1	0
ENSMUSG00000039519	Cyp7b1	0.0121477	0.00846167	-0.145662	0.0249722	0.079	0.166667	1	0
ENSMUSG00000034730	Adgrb1	0.0122369	0.00805966	0.27466	0.0294613	0.568	0.477	1	0
ENSMUSG00000034796	Cpne7	0.0122929	0.00732989	0.187176	0.025606	0.168	0.0823333	1	0
ENSMUSG00000052544	St6galnac3	0.0124434	0.0100021	-0.2894	0.0596092	0.421	0.545667	1	0
ENSMUSG00000037990	Sh3rf3	0.0126107	0.00304216	-0.272721	0.0275005	0.526	0.621	1	0	SFARI					2	0
ENSMUSG00000043557	Mdga1	0.0128364	0.0136598	0.166458	0.0332121	0.226	0.124333	1	0
ENSMUSG00000055639	Dach1	0.0128384	0.0159275	-0.386418	0.145761	0.205	0.323	1	0
ENSMUSG00000038563	Efl1	0.0129196	0.0130815	-0.139109	0.0571832	0.053	0.142	1	0
ENSMUSG00000032046	Abhd12	0.0131414	0.00569611	0.193174	0.00714975	0.268	0.168667	1	0
ENSMUSG00000052516	Robo2	0.013279	0.00645584	-0.269248	0.0436636	0.811	0.858	1	0	SFARI					2	0
ENSMUSG00000017132	Cyth1	0.0133931	0.00487271	-0.150615	0.0139993	0.095	0.184	1	0
ENSMUSG00000005986	Ankrd13d	0.01358	0.0114001	0.168585	0.0237876	0.211	0.116	1	0
ENSMUSG00000003410	Elavl3	0.0136955	0.01635	0.167946	0.0140584	0.289	0.173667	1	0	SFARI;EAGLE		Limited	1	Discordant	1	0
ENSMUSG00000036225	Kctd1	0.0137636	0.00260989	-0.270512	0.0116097	0.489	0.6	1	0
ENSMUSG00000021996	Esd	0.0137996	0.0186079	0.137659	0.0259215	0.111	0.0386667	1	0
ENSMUSG00000030662	Ipo5	0.0138224	0.0222947	0.167124	0.0337824	0.184	0.0843333	1	0
ENSMUSG00000026872	Zeb2	0.0138645	0.0140262	-0.239872	0.0800996	0.058	0.144	1	0
ENSMUSG00000036564	Ndrg4	0.0138705	0.0113283	0.298533	0.0298051	0.621	0.561333	1	0
ENSMUSG00000074776	Gm10754	0.0139377	0.0187699	-0.328561	0.100526	0.458	0.589333	1	0
ENSMUSG00000022186	Oxct1	0.0140031	0.00254088	-0.209757	0.0174294	0.358	0.491333	1	0
ENSMUSG00000038453	Srcin1	0.0140613	0.0106962	-0.16477	0.0237088	0.211	0.323	1	0
ENSMUSG00000007653	Gabrb2	0.0141991	0.00841965	-0.282795	0.0692045	0.437	0.545667	1	0	SFARI;EAGLE		Limited	0.3	Discordant	1	0
ENSMUSG00000025885	Myo5b	0.0142607	0.00612309	-0.124855	0.0175387	0.047	0.116	1	0
ENSMUSG00000097391	Mirg	0.0144531	0.0196985	0.307931	0.0521407	0.542	0.436667	1	0
ENSMUSG00000052372	Il1rapl1	0.014467	0.00980972	-0.152166	0.0274438	1	1	1	0	SFARI					2	0
ENSMUSG00000022312	Eif3h	0.0145476	0.0128397	-0.10723	0.00358254	0.095	0.189667	1	0
ENSMUSG00000038738	Shank1	0.0145885	0.014176	0.150299	0.0344714	0.189	0.0966667	1	0	SFARI					2	0
ENSMUSG00000030067	Foxp1	0.0145926	0.00429482	-0.290862	0.00531101	0.484	0.603667	1	0	SFARI;EAGLE;TADA	0	Definitive	60.45	Concordant	1	1
ENSMUSG00000028176	Lrrc7	0.0146798	0.0112409	-0.177642	0.0299023	0.995	1	1	0
ENSMUSG00000020894	Vamp2	0.0147103	0.0117157	0.126719	0.0142259	0.179	0.091	1	0	SFARI						1
ENSMUSG00000026207	Speg	0.0147485	0.0218302	0.226356	0.0413728	0.421	0.3	1	0
ENSMUSG00000054459	Vsnl1	0.0147566	0.016309	0.257541	0.00633418	0.305	0.198	1	0
ENSMUSG00000003604	Aven	0.0148616	0.015965	-0.123138	0.00655776	0.047	0.121	1	0
ENSMUSG00000006599	Gtf2h1	0.0148663	0.0175528	-0.130511	0.0226631	0.063	0.145333	1	0
ENSMUSG00000028289	Epha7	0.0149552	0.0100795	-0.22562	0.0483745	0.3	0.43	1	0
ENSMUSG00000008658	Rbfox1	0.0149791	0.0145364	-0.254937	0.0564629	1	1	1	0	SFARI					2	0
ENSMUSG00000028559	Osbpl9	0.0150879	0.0027037	-0.224796	0.0231379	0.426	0.549333	1	0
ENSMUSG00000040441	Slc26a10	0.0150948	0.0139282	0.101082	0.0228288	0.137	0.0596667	1	0
ENSMUSG00000029422	Rsrc2	0.0151028	0.0129036	0.198893	0.0359621	0.437	0.312333	1	0
ENSMUSG00000032773	Chrm1	0.0151439	0.00732116	0.151338	0	0.205	0.114	1	0
ENSMUSG00000024325	Ring1	0.0152995	0.0208707	0.217516	0.0250195	0.226	0.126333	1	0
ENSMUSG00000106515	Gm30382	0.015324	0.00566938	-0.163213	0.0298665	0.079	0.161333	1	0
ENSMUSG00000017677	Wsb1	0.0153574	0.02031	0.253296	0.0577357	0.358	0.242	1	0
ENSMUSG00000032329	Hmg20a	0.0153823	0.0113319	-0.17147	0.0232194	0.232	0.357667	1	0
ENSMUSG00000070866	Zfp804a	0.0154357	0.0134082	-0.26348	0.0682645	0.342	0.482333	1	0	SFARI					2	0
ENSMUSG00000075229	Ccdc58	0.0155786	0.00840571	-0.135792	0.0073712	0.068	0.145667	1	0
ENSMUSG00000062184	Hs6st2	0.0157049	0.0211907	-0.320348	0.0787565	0.658	0.782667	1	0
ENSMUSG00000021720	Rnf180	0.0158221	0.0167353	-0.129613	0.0459787	0.111	0.205333	1	0
ENSMUSG00000022601	Zbtb11	0.0160547	0.0146433	-0.166154	0.0109963	0.195	0.310333	1	0
ENSMUSG00000056201	Cfl1	0.016321	0.0254634	0.178471	0.0284387	0.174	0.079	1	0
ENSMUSG00000029486	Mrpl1	0.0165761	0.0227402	-0.132573	0.0218293	0.105	0.207	1	0
ENSMUSG00000000127	Fer	0.016776	0.0173283	-0.213147	0.0414791	0.253	0.371667	1	0
ENSMUSG00000057455	Rit2	0.0169188	0.0118929	-0.2161	0.0271316	0.8	0.847	1	0	SFARI					2	0
ENSMUSG00000025812	Pard3	0.0169404	0.0197024	-0.237641	0.0637653	0.668	0.763333	1	0
ENSMUSG00000009569	Mrtfb	0.0169442	0.0160193	-0.229485	0.041712	0.742	0.802	1	0	SFARI					2	0
ENSMUSG00000007038	Neu1	0.0170043	0.0158537	0.112745	0.0194401	0.105	0.0366667	1	0
ENSMUSG00000019505	Ubb	0.0171274	0.0159414	0.201339	0.0475944	0.337	0.213667	1	0
ENSMUSG00000022265	Ank	0.0171487	0.00535978	-0.203026	0.0327857	0.311	0.445333	1	0
ENSMUSG00000058297	Spock2	0.0171563	0.0118259	0.211922	0.0463633	0.384	0.275333	1	0
ENSMUSG00000027799	Nbea	0.0174569	0.0286342	-0.135955	0.0613653	0.979	0.994667	1	0	SFARI					1	1
ENSMUSG00000078681	Tm2d3	0.0177704	0.0266737	0.130415	0.0215346	0.121	0.0456667	1	0
ENSMUSG00000023092	Fhl1	0.0179735	0.00447228	0.176458	0.0117295	0.316	0.209	1	0
ENSMUSG00000021448	Shc3	0.0179737	0.0190053	-0.175177	0.0541682	0.158	0.263	1	0
ENSMUSG00000044288	Cnr1	0.018231	0.00524008	-0.280379	0.0261131	0.189	0.284	1	0	SFARI					2	0
ENSMUSG00000053332	Gas5	0.0184098	0.013527	0.188673	0.0341602	0.311	0.203667	1	0
ENSMUSG00000028136	Snx27	0.0191479	0.0126363	-0.133971	0.0218266	0.189	0.301667	1	0
ENSMUSG00000037351	Actr1b	0.0194142	0.00849495	0.226492	0.0193114	0.3	0.209	1	0
ENSMUSG00000046364	Rpl27a	0.0196704	0.0097817	0.146094	0.00820638	0.126	0.058	1	0
ENSMUSG00000036422	Pcdh8	0.0198801	0.0122527	0.124419	0.0145168	0.158	0.0786667	1	0
ENSMUSG00000024597	Slc12a2	0.0200612	0.00568679	-0.139753	0.0173828	0.111	0.198333	1	0
ENSMUSG00000041444	Arhgap32	0.0201435	0.00475408	-0.188122	0.0178348	0.589	0.696667	1	0	SFARI					2	0
ENSMUSG00000029103	Lrpap1	0.0201796	0.0272533	0.216432	0.0766556	0.321	0.199667	1	0
ENSMUSG00000068917	Clk2	0.0203886	0.0169716	0.139029	0.020611	0.195	0.103667	1	0
ENSMUSG00000019124	Scrn1	0.0204095	0.00441537	-0.155835	0.00663701	0.142	0.235333	1	0
ENSMUSG00000027822	Slc33a1	0.0204205	0.019313	-0.111452	0.0382109	0.079	0.166667	1	0
ENSMUSG00000029920	Smarcad1	0.0205298	0.0128142	-0.18239	0.0378074	0.189	0.292667	1	0
ENSMUSG00000019916	P4ha1	0.0206459	0.0128848	-0.105216	0.055923	0.242	0.377	1	0
ENSMUSG00000000948	Gm38393	0.0209105	0.0134387	-0.175328	0.017005	0.389	0.522667	1	0
ENSMUSG00000052584	Serp2	0.0210273	0.0359514	0.158925	0.062953	0.226	0.105333	1	0
ENSMUSG00000021254	Gpatch2l	0.0211245	0.015302	-0.109963	0.00661792	0.053	0.121	1	0
ENSMUSG00000004980	Hnrnpa2b1	0.0211437	0.0109316	0.273618	0.0193966	0.621	0.577333	1	0
ENSMUSG00000042604	Kcna4	0.0211617	0.000576658	-0.0944058	0.00652808	0.068	0.142	1	0
ENSMUSG00000032846	Zswim6	0.0212006	0.0262103	-0.30148	0.0387877	0.779	0.835	1	0	SFARI						1
ENSMUSG00000018796	Acsl1	0.0214801	0.0149614	0.160085	0.0210039	0.174	0.093	1	0
ENSMUSG00000024240	Epc1	0.0215229	0.0177086	-0.168467	0.0148403	0.347	0.47	1	0
ENSMUSG00000032966	Fkbp1a	0.0216837	0.035837	0.24362	0.0602422	0.368	0.240333	1	0
ENSMUSG00000021268	Meg3	0.0220573	0.0358376	0.180321	0.054214	1	1	1	0
ENSMUSG00000022762	Ncam2	0.0227899	0.0128865	-0.183863	0.0388563	0.932	0.971667	1	0
ENSMUSG00000079564	Gm11149	0.022936	0.0315146	-0.15094	0.0388602	0.058	0.135333	1	0
ENSMUSG00000026425	Srgap2	0.0229625	0.0170491	-0.235164	0.0513352	0.263	0.373667	1	0
ENSMUSG00000037428	Vgf	0.0232169	0.0180183	0.227733	0.0441797	0.284	0.187667	1	0
ENSMUSG00000096768	Gm47283	0.0235342	0.0179569	0.253178	0.027383	0.437	0.333	1	0
ENSMUSG00000074794	Arrdc3	0.0235621	0.0318341	-0.159663	0.0439807	0.089	0.177333	1	0
ENSMUSG00000058571	Gpc6	0.0236127	0.0215114	-0.257204	0.0880135	0.726	0.837	1	0	SFARI					2	0
ENSMUSG00000057060	Slc35f3	0.0238039	0.0309152	-0.210354	0.063938	0.484	0.624667	1	0
ENSMUSG00000056755	Grm7	0.0240659	0.0226979	-0.10881	0.0438535	0.995	0.998333	1	0	SFARI					2	0
ENSMUSG00000023868	Pde10a	0.0242056	0.0176718	-0.268012	0.0371868	0.968	0.982333	1	0
ENSMUSG00000097911	Gm26691	0.0243167	0.0105755	-0.243668	0.00966711	0.321	0.421333	1	0
ENSMUSG00000079056	Kcnip3	0.0243442	0.0140314	-0.114965	0.0090531	0.116	0.205333	1	0
ENSMUSG00000027520	Zdbf2	0.0247613	0.0160571	-0.0783471	0.0506171	0.132	0.228	1	0
ENSMUSG00000025279	Dnase1l3	0.024854	0.0395744	0.159468	0.026315	0.1	0.0333333	1	0
ENSMUSG00000034653	Ythdc2	0.0248634	0.0236262	-0.168537	0.0574566	0.232	0.345667	1	0	SFARI					2	0
ENSMUSG00000038034	Igsf8	0.0249213	0.0245298	0.2055	0.0409589	0.189	0.105	1	0
ENSMUSG00000041650	Pcca	0.0249312	0.0202884	-0.197028	0.014166	0.274	0.372	1	0	SFARI						1
ENSMUSG00000003363	Pld3	0.024941	0.0210082	0.235363	0.0363742	0.311	0.223	1	0
ENSMUSG00000019943	Atp2b1	0.024972	0.0119625	-0.221241	0.0322257	0.958	0.984333	1	0	SFARI					3	0
ENSMUSG00000028033	Kcnq5	0.0249911	0.0303379	-0.213303	0.0633527	0.963	0.979	1	0
ENSMUSG00000104093	A330015K06Rik	0.0250313	0.0152126	-0.199286	0.00993017	0.426	0.559333	1	0
ENSMUSG00000025240	Sacm1l	0.0252408	0.0188384	-0.180566	0.00530405	0.2	0.296333	1	0
ENSMUSG00000027221	Chst1	0.0252812	0.0183293	0.115304	0.0281019	0.147	0.072	1	0
ENSMUSG00000052917	Senp7	0.0253273	0.0283325	-0.145129	0.00591728	0.368	0.507	1	0
ENSMUSG00000073643	Wdfy1	0.0254261	0.0158717	-0.117551	0.0208762	0.063	0.133	1	0
ENSMUSG00000004591	Pkn2	0.0254333	0.0180227	-0.174207	0.0354151	0.284	0.401667	1	0
ENSMUSG00000038346	Zfp384	0.0254733	0.0111155	0.115477	0	0.132	0.063	1	0
ENSMUSG00000020546	Stxbp4	0.0257138	0.019926	-0.124503	0.016107	0.079	0.154333	1	0
ENSMUSG00000048240	Gng7	0.0260219	0.0429495	-0.146567	0.0743665	0.326	0.493	1	0
ENSMUSG00000026888	Grb14	0.0261115	0.021437	-0.15591	0.0507577	0.2	0.310333	1	0
ENSMUSG00000068748	Ptprz1	0.0263083	0.0241558	0.142025	0.0780098	0.363	0.244	1	0
ENSMUSG00000037098	Rab11fip3	0.0263339	0.0303971	0.20065	0.0611026	0.379	0.268333	1	0
ENSMUSG00000070544	Top1	0.0263469	0.0136302	-0.176479	0.0462219	0.5	0.610667	1	0
ENSMUSG00000024743	Syt7	0.0267563	0.0321851	0.194624	0.0336008	0.421	0.303333	1	0
ENSMUSG00000032020	Ubash3b	0.0269316	0.0244587	-0.224085	0.0620863	0.174	0.272	1	0
ENSMUSG00000025810	Nrp1	0.0270391	0.0360527	-0.127347	0.0527872	0.084	0.172	1	0
ENSMUSG00000004040	Stat3	0.027183	0.0304888	0.210794	0.0246673	0.147	0.0736667	1	0
ENSMUSG00000037852	Cpe	0.0273393	0.0112349	0.272214	0.00683676	0.553	0.485667	1	0
ENSMUSG00000087177	E130307A14Rik	0.0274719	0.0171035	-0.186503	0.0206213	0.368	0.481	1	0
ENSMUSG00000097545	Mir124a-1hg	0.0276689	0.0258257	0.215044	0.0321634	0.632	0.547333	1	0
ENSMUSG00000037646	Vps13b	0.0276855	0.0200239	-0.169055	0.0190961	0.758	0.822667	1	0	SFARI;EAGLE		Moderate	6.35	Discordant	1	1
ENSMUSG00000032452	Clstn2	0.0277177	0.0287027	-0.279858	0.0652624	0.605	0.7	1	0
ENSMUSG00000042256	Ptchd4	0.0278332	0.0256687	-0.249729	0.0889427	0.153	0.251	1	0
ENSMUSG00000037306	Man1c1	0.0279647	0.0201576	0.152128	0.0232464	0.205	0.121	1	0
ENSMUSG00000022415	Syngr1	0.0282402	0.0270492	0.166221	0.0219638	0.163	0.0876667	1	0
ENSMUSG00000040724	Kcna2	0.0283121	0.0198464	0.133353	0.00832947	0.105	0.0456667	1	0	SFARI						1
ENSMUSG00000029918	Mrps33	0.028335	0.0189991	0.132647	0.0177482	0.142	0.072	1	0
ENSMUSG00000040852	Plekhh2	0.0284471	0.0270383	-0.110829	0.0128409	0.095	0.180667	1	0
ENSMUSG00000057378	Ryr3	0.0284879	0.0283186	-0.279027	0.0508018	0.821	0.875333	1	0
ENSMUSG00000058672	Tubb2a	0.0290965	0.0126724	0.154378	0.0252102	0.168	0.091	1	0
ENSMUSG00000074736	Syndig1	0.0293321	0.0445342	-0.17286	0.0886258	0.3	0.449	1	0
ENSMUSG00000052105	Mtcl1	0.0297321	0.0152293	-0.220739	0.030908	0.326	0.421333	1	0
ENSMUSG00000054477	Kcnn2	0.0297568	0.037946	-0.206629	0.0370033	0.416	0.54	1	0
ENSMUSG00000039841	Zfp800	0.0297645	0.0389249	-0.137681	0.0442729	0.079	0.159667	1	0
ENSMUSG00000036264	Fstl4	0.0298026	0.030925	-0.162483	0.0635211	0.074	0.154333	1	0
ENSMUSG00000031818	Cox4i1	0.0298735	0.0391208	0.205718	0.0488054	0.226	0.133333	1	0
ENSMUSG00000030590	Fam98c	0.0299917	0.0386171	0.101497	0.0149504	0.121	0.0523333	1	0	SFARI					2	0
ENSMUSG00000071424	Grid2	0.0299982	0.0291126	-0.205295	0.0308416	0.932	0.973667	1	0	SFARI					2	0
ENSMUSG00000036167	Pphln1	0.0303011	0.00605735	-0.086306	0.0103673	0.047	0.107	1	0
ENSMUSG00000027706	Sec62	0.030363	0.0256378	0.231023	0.0343331	0.4	0.298333	1	0
ENSMUSG00000001415	Smg5	0.0305249	0.0352859	0.225357	0.0547873	0.316	0.214	1	0
ENSMUSG00000028149	Rap1gds1	0.0305503	0.00743548	-0.142406	0.0214279	0.463	0.607	1	0
ENSMUSG00000027030	Stk39	0.0306986	0.021618	-0.188617	0.0139621	0.274	0.372	1	0	SFARI					2	0
ENSMUSG00000040133	Gpr176	0.0308349	0.0222103	-0.133528	0.0255374	0.068	0.136667	1	0
ENSMUSG00000034488	Edil3	0.0308951	0.0153382	-0.325825	0.0456378	0.284	0.373667	1	0
ENSMUSG00000028960	Ube4b	0.0311003	0.0116792	-0.172873	0.0210217	0.305	0.412333	1	0
ENSMUSG00000024862	Klc2	0.0311568	0.0333253	0.101567	0.0229418	0.111	0.0473333	1	0
ENSMUSG00000034059	Ypel4	0.0311789	0.0379023	0.162354	0.0279671	0.153	0.079	1	0
ENSMUSG00000004961	Syt5	0.0313437	0.0365475	0.171078	0.0481344	0.353	0.245333	1	0
ENSMUSG00000031996	Aplp2	0.0313589	0.0321762	0.23536	0.0495392	0.453	0.347333	1	0
ENSMUSG00000040035	Disp2	0.0313926	0.033944	0.188785	0.0556395	0.168	0.0843333	1	0
ENSMUSG00000044349	Snhg11	0.0318232	0.027592	0.14812	0.0383712	0.995	1	1	0
ENSMUSG00000028488	Sh3gl2	0.0319861	0.0142257	-0.187696	0.0195995	0.558	0.675	1	0
ENSMUSG00000025255	Zfhx4	0.0322284	0.0320285	-0.213549	0.0529035	0.132	0.221	1	0
ENSMUSG00000031633	Slc25a4	0.0324816	0.0087007	0.151374	0.00638365	0.226	0.138667	1	0
ENSMUSG00000103428	Gm20754	0.03262	0.0405974	-0.227192	0.0715277	0.053	0.122667	1	0
ENSMUSG00000058589	Anks1b	0.0326736	0.02169	-0.197445	0.012884	0.995	0.993	1	0	SFARI					2	1
ENSMUSG00000022119	Rbm26	0.0326852	0.0120199	-0.200257	0.0501221	0.495	0.587667	1	0
ENSMUSG00000008348	Ubc	0.0327277	0.0430622	0.159377	0.0218603	0.168	0.0896667	1	0
ENSMUSG00000028360	Slc44a5	0.032822	0.0273094	-0.246226	0.0645189	0.4	0.526	1	0
ENSMUSG00000014850	Msh3	0.0332315	0.0160302	-0.140812	0.0147583	0.163	0.251	1	0
ENSMUSG00000052738	Suclg1	0.0333102	0.0405802	0.129646	0.0270964	0.174	0.0913333	1	0
ENSMUSG00000041058	Wwp1	0.0334859	0.0167368	-0.18495	0.0208137	0.205	0.3	1	0	SFARI					3	0
ENSMUSG00000029088	Kcnip4	0.0335109	0.00225776	-0.133572	0.0335992	1	0.991	1	0
ENSMUSG00000034135	Sik3	0.0336006	0.0394211	-0.229543	0.0627746	0.732	0.801667	1	0
ENSMUSG00000047767	Atg16l2	0.0337357	0.0276878	0.116692	0.0249491	0.305	0.2	1	0
ENSMUSG00000053347	Zfp943	0.0338504	0.00896249	-0.139919	0.0277673	0.137	0.217667	1	0
ENSMUSG00000030231	Plekha5	0.0339015	0.043813	-0.248098	0.0766328	0.784	0.847333	1	0
ENSMUSG00000026163	Sphkap	0.0339898	0.036309	0.252194	0.0596989	0.4	0.294667	1	0
ENSMUSG00000041841	Rpl37	0.0340921	0.00542374	0.151844	0.0170002	0.174	0.1	1	0
ENSMUSG00000051331	Cacna1c	0.0341685	0.0179019	-0.139705	0.0324671	0.979	0.975667	1	0	SFARI					1	1
ENSMUSG00000055471	Alk	0.0342153	0.0291671	-0.236338	0.0321071	0.537	0.633333	1	0
ENSMUSG00000008892	Vdac3	0.0352435	0.0409562	0.0931946	0.0316498	0.137	0.065	1	0
ENSMUSG00000020599	Rgs9	0.0352562	0.0346563	-0.204877	0.0502139	0.579	0.698333	1	0
ENSMUSG00000026179	Pnkd	0.0354428	0.0298917	-0.089417	0.0241616	0.058	0.123	1	0
ENSMUSG00000035575	Utp6	0.0354546	0.0182637	0.0888853	0.00417515	0.105	0.0473333	1	0
ENSMUSG00000038696	Mapkap1	0.0357827	0.0315352	-0.219416	0.0198124	0.363	0.458	1	0
ENSMUSG00000006576	Slc4a3	0.0359196	0.0262742	0.254889	0.0386519	0.342	0.257667	1	0
ENSMUSG00000033487	Fndc3a	0.0359273	0.0337938	0.238003	0.0315665	0.437	0.345667	1	0
ENSMUSG00000002748	Baz1b	0.0359449	0.0506107	-0.181477	0.0422403	0.253	0.359667	1	0
ENSMUSG00000035580	Kcnh8	0.0360261	0.00994135	-0.151084	0.0312327	0.079	0.145333	1	0
ENSMUSG00000020982	Nemf	0.036133	0.0248314	0.202632	0.0301869	0.268	0.180333	1	0
ENSMUSG00000023826	Prkn	0.0362627	0.0163256	-0.182479	0.0182039	0.753	0.821333	1	0	SFARI					2	0
ENSMUSG00000087370	Tmem170b	0.0363272	0.0112138	0.159915	0.016096	0.137	0.072	1	0
ENSMUSG00000038860	Garnl3	0.0366841	0.0340605	-0.133106	0.026294	0.084	0.157667	1	0
ENSMUSG00000039913	Pak5	0.0366934	0.0385794	-0.223495	0.101374	0.442	0.573667	1	0
ENSMUSG00000013033	Adgrl1	0.0367103	0.0250806	0.204196	0.0394989	0.458	0.371667	1	0	SFARI						1
ENSMUSG00000038518	Jarid2	0.0368982	0.0512917	-0.205024	0.0431588	0.747	0.807	1	0	SFARI					2	0
ENSMUSG00000019828	Grm1	0.0371089	0.0335375	-0.32542	0.12148	0.321	0.423	1	0
ENSMUSG00000049232	Tigd2	0.0372601	0.02938	-0.0928109	0.0359841	0.074	0.144	1	0
ENSMUSG00000050711	Scg2	0.0372902	0.0522515	0.274974	0.0586223	0.305	0.210333	1	0
ENSMUSG00000056268	Dennd1b	0.0373583	0.0368388	-0.186152	0.0767715	0.426	0.554	1	0
ENSMUSG00000052139	Babam2	0.0374645	0.0224575	-0.182033	0.0271656	0.232	0.328333	1	0
ENSMUSG00000020458	Rtn4	0.0378052	0.0103484	0.198332	0.0194617	0.579	0.47	1	0
ENSMUSG00000040612	Ildr2	0.0381794	0.023659	0.211328	0.0344714	0.442	0.359667	1	0
ENSMUSG00000039218	Srrm2	0.0391575	0.0555478	0.187986	0.0554528	0.842	0.823	1	0	SFARI					2	1
ENSMUSG00000030064	Frmd4b	0.0393527	0.0159204	-0.20012	0.00932351	0.289	0.391333	1	0
ENSMUSG00000019813	Cep57l1	0.039373	0.0330492	0.177537	0.0142414	0.174	0.101667	1	0
ENSMUSG00000039607	Rbms3	0.0394639	0.0410652	-0.18449	0.0621173	0.784	0.866667	1	0
ENSMUSG00000023004	Tuba1b	0.0394966	0.0372701	0.0904272	0.00717765	0.1	0.0423333	1	0
ENSMUSG00000041236	Vps41	0.0397266	0.0291356	-0.148916	0.040233	0.258	0.363	1	0
ENSMUSG00000027016	Zfp385b	0.0404087	0.0470747	-0.170121	0.0697143	0.811	0.882	1	0	SFARI					2	0
ENSMUSG00000002379	Ndufa11	0.0404102	0.0543611	0.134523	0.0164944	0.121	0.056	1	0
ENSMUSG00000062209	Erbb4	0.0405979	0.0208634	0.275678	0.0196968	0.995	0.984	1	0
ENSMUSG00000019843	Fyn	0.0407515	0.00558813	-0.157353	0.0233317	0.247	0.347333	1	0
ENSMUSG00000036699	Zcchc12	0.0408228	0.0269423	0.108434	0.0070376	0.142	0.0753333	1	0
ENSMUSG00000040952	Rps19	0.0408547	0.0278968	0.10293	0.0187446	0.116	0.0563333	1	0
ENSMUSG00000029427	Zcchc8	0.0409503	0.0459156	-0.132168	0.0299064	0.132	0.217667	1	0
ENSMUSG00000015733	Capza2	0.0411425	0.0415635	-0.157508	0.0379488	0.132	0.216	1	0
ENSMUSG00000026833	Olfm1	0.0413125	0.0134592	0.25226	0.0268392	0.253	0.177333	1	0
ENSMUSG00000057738	Sptan1	0.0416361	0.0323303	0.239148	0.0396368	0.537	0.463	1	0
ENSMUSG00000005886	Ncoa2	0.0418415	0.0242625	-0.163031	0.0616004	0.479	0.575667	1	0
ENSMUSG00000040896	Kcnd3	0.0422228	0.0174166	0.199169	0.0226705	0.432	0.336667	1	0	SFARI					2	0
ENSMUSG00000026482	Rgl1	0.0424553	0.0369488	-0.164138	0.0403978	0.289	0.395	1	0
ENSMUSG00000002489	Tiam1	0.042502	0.0438048	0.299886	0.0824736	0.668	0.591333	1	0
ENSMUSG00000097207	6030443J06Rik	0.0425431	0.0370593	-0.0866447	0.00646953	0.068	0.137	1	0
ENSMUSG00000029655	N4bp2l2	0.0426234	0.0158672	-0.123441	0.0169086	0.358	0.485667	1	0
ENSMUSG00000064115	Cadm2	0.0426709	0.0508684	-0.152184	0.0465652	1	1	1	0	SFARI					2	0
ENSMUSG00000058444	Map2k5	0.042694	0.0407918	-0.140275	0.0848819	0.195	0.3	1	0
ENSMUSG00000043067	Dpy19l1	0.0428029	0.0266553	-0.159746	0.0328968	0.111	0.184333	1	0
ENSMUSG00000030410	Dmwd	0.0428072	0.0259486	0.142445	0.016253	0.132	0.0686667	1	0	SFARI;TADA	0.00413177				2	0
ENSMUSG00000055932	Fto	0.0428352	0.0534484	-0.158971	0.0521501	0.384	0.529667	1	0
ENSMUSG00000053465	Hs6st3	0.0429388	0.0179687	-0.160938	0.0235936	0.758	0.849333	1	0
ENSMUSG00000019370	Calm3	0.0430381	0.0151503	0.0856658	0.0109408	0.105	0.049	1	0
ENSMUSG00000032383	Ppib	0.0432878	0.0334479	0.180004	0.0564694	0.268	0.184	1	0
ENSMUSG00000029822	Osbpl3	0.0435815	0.0498656	-0.240981	0.0280394	0.184	0.27	1	0
ENSMUSG00000007908	Hmgcll1	0.0437497	0.0159034	0.166061	0.00907009	0.484	0.378667	1	0
ENSMUSG00000061904	Slc25a3	0.043839	0.0278253	0.214747	0.0386769	0.442	0.365	1	0
ENSMUSG00000020170	Frs2	0.0438983	0.00844097	-0.107803	0	0.163	0.251	1	0
ENSMUSG00000078591	Hs3st4	0.0440436	0.0381485	-0.255056	0.0592392	0.405	0.502	1	0
ENSMUSG00000053768	Chchd3	0.0441965	0.0539488	-0.179266	0.0587711	0.384	0.503333	1	0
ENSMUSG00000035202	Lars2	0.0443059	0.0332515	0.226624	0.0539854	0.479	0.395	1	0
ENSMUSG00000032855	Pkd1	0.044359	0.0554396	0.280155	0.0313912	0.463	0.395	1	0
ENSMUSG00000036879	Phkb	0.0445747	0.0235819	-0.157766	0.0284126	0.168	0.256	1	0
ENSMUSG00000039067	Psmd7	0.0446068	0.07179	-0.11132	0.0376059	0.058	0.135	1	0
ENSMUSG00000032482	Cspg5	0.0446206	0.0456466	0.127387	0.0179234	0.116	0.056	1	0
ENSMUSG00000113241	Gm40663	0.0446269	0.0664537	-0.217695	0.0591775	0.247	0.356	1	0
ENSMUSG00000044221	Grsf1	0.0447648	0.0244486	0.0852784	0.0147862	0.111	0.0526667	1	0
ENSMUSG00000117317	Gm49961	0.0448229	0.0269089	-0.122498	0.0309645	0.089	0.16	1	0
ENSMUSG00000006262	Mob1b	0.0450028	0.0484238	-0.106753	0.026557	0.126	0.210333	1	0
ENSMUSG00000032537	Ephb1	0.0451191	0.032735	-0.191769	0.040595	0.468	0.566667	1	0	SFARI					3	0
ENSMUSG00000056458	Mok	0.0453723	0.0521774	-0.13538	0.0242453	0.111	0.193	1	0
ENSMUSG00000038122	Tbc1d32	0.0454057	0.055341	-0.111726	0.0567231	0.111	0.194667	1	0
ENSMUSG00000020564	Atxn7l1	0.0455084	0.0157179	-0.125795	0.0124522	0.268	0.365	1	0
ENSMUSG00000005045	Chd5	0.0455393	0.0191446	0.167191	0.0144863	0.242	0.166667	1	0
ENSMUSG00000091337	Eid1	0.045818	0.0152872	-0.0709339	0.00774834	0.053	0.110667	1	0
ENSMUSG00000022961	Son	0.0462336	0.0760007	0.178682	0.0635993	0.8	0.736667	1	0	SFARI;EAGLE		Moderate	11	Discordant	1	1
ENSMUSG00000038127	Ccdc50	0.0465936	0.0289717	-0.140199	0.00955793	0.084	0.150667	1	0
ENSMUSG00000037622	Wdtc1	0.04669	0.0430947	-0.122378	0.0286113	0.063	0.125	1	0
ENSMUSG00000032898	Fbxo21	0.0467225	0.0648982	0.104085	0.0327811	0.121	0.0546667	1	0
ENSMUSG00000021190	Lgmn	0.0469134	0.0349729	0.111145	0.0221739	0.147	0.0806667	1	0
ENSMUSG00000059474	Mbtd1	0.0471337	0.056436	-0.210899	0.031799	0.379	0.463	1	0
ENSMUSG00000047434	Xxylt1	0.0472558	0.0242089	-0.0793315	0.0249796	0.068	0.131333	1	0
ENSMUSG00000041923	Nol4	0.0473658	0.025538	-0.135523	0.0369403	0.442	0.552667	1	0
ENSMUSG00000034771	Tle2	0.0474407	0.03723	0.0860804	0.0109954	0.105	0.049	1	0
ENSMUSG00000015968	Cacna1d	0.0474534	0.0543846	0.166293	0.0330585	0.889	0.907	1	0	SFARI					2	0
ENSMUSG00000045482	Trrap	0.0475862	0.0160716	0.195025	0.0177584	0.347	0.273333	1	0	SFARI					2	1
ENSMUSG00000028347	Tmeff1	0.0476135	0.0647582	-0.163865	0.0475632	0.153	0.244	1	0
ENSMUSG00000074235	Gm10649	0.0476276	0.0348251	-0.144502	0.0514372	0.189	0.291333	1	0
ENSMUSG00000045671	Spred2	0.047742	0.0359517	-0.165765	0.0525685	0.311	0.412333	1	0
ENSMUSG00000027540	Ptpn1	0.0478465	0.0428773	0.153255	0.0263254	0.205	0.128333	1	0
ENSMUSG00000034685	Fam171a2	0.0480402	0.0117354	0.132461	0.00693609	0.142	0.0806667	1	0
ENSMUSG00000040640	Erc2	0.0481711	0.0638252	-0.172614	0.0329929	0.989	0.994667	1	0
ENSMUSG00000021134	Srsf5	0.0482019	0.0226033	0.236908	0.0219389	0.568	0.531667	1	0
ENSMUSG00000035293	G2e3	0.0482706	0.0606829	-0.1098	0.0406323	0.074	0.147333	1	0
ENSMUSG00000040712	Camta2	0.0482829	0.0419799	0.118316	0.0386158	0.153	0.0806667	1	0	TADA	0.0140968
ENSMUSG00000041763	Tpp2	0.0484144	0.0378226	-0.154482	0.038129	0.232	0.325	1	0
ENSMUSG00000045216	Hs6st1	0.0485012	0.0134981	-0.100421	0.0129394	0.089	0.156333	1	0
ENSMUSG00000063887	Nlgn1	0.0486959	0.0577155	-0.284983	0.0757882	0.953	0.950667	1	0	SFARI					2	0
ENSMUSG00000037771	Slc32a1	0.0487087	0.0587492	0.189174	0.0441371	0.289	0.194667	1	0
ENSMUSG00000025579	Gaa	0.0488224	0.0534695	0.177973	0.0872906	0.247	0.151	1	0
ENSMUSG00000022489	Pde1b	0.0488284	0.025956	-0.172248	0.0308066	0.316	0.403333	1	0
ENSMUSG00000064329	Scn1a	0.0489873	0.0204059	-0.188675	0.015624	0.532	0.631667	1	0	SFARI					1	1
ENSMUSG00000024777	Ppp2r5b	0.0490848	0.0222747	0.116587	0.00714212	0.121	0.063	1	0
ENSMUSG00000038351	Sgsm2	0.0493471	0.0204313	0.183015	0.00359802	0.253	0.177	1	0
ENSMUSG00000001119	Col6a1	0.0493946	0.0581441	0.15123	0.0369922	0.179	0.103667	1	0
ENSMUSG00000060166	Zdhhc8	0.0496857	0.0140334	0.0899932	0.00714212	0.105	0.051	1	0
ENSMUSG00000021823	Vcl	0.0502416	0.0518304	0.224613	0.0580584	0.432	0.351	1	0
ENSMUSG00000032228	Tcf12	0.0504872	0.0207636	-0.17058	0.0403834	0.505	0.592667	1	0
ENSMUSG00000033352	Map2k4	0.0505307	0.0325374	-0.186109	0.0201068	0.437	0.558	1	0
ENSMUSG00000041936	Agrn	0.050672	0.0753892	0.216548	0.0462864	0.316	0.217667	1	0
ENSMUSG00000005338	Cadm3	0.0507419	0.0439524	0.153333	0.0321057	0.211	0.135	1	0
ENSMUSG00000047547	Cltb	0.0507553	0.0424519	0.168981	0.0430927	0.258	0.17	1	0
ENSMUSG00000035517	Tdrd7	0.0511695	0.0443484	-0.0966962	0.0186882	0.116	0.196667	1	0
ENSMUSG00000040269	Mrps28	0.0513587	0.0277357	-0.11384	0.0158845	0.1	0.168333	1	0
ENSMUSG00000051166	Eml5	0.0515291	0.0179378	0.168829	0.0065884	0.789	0.712333	1	0
ENSMUSG00000072294	Klf12	0.0516382	0.0213128	-0.234968	0.0158754	0.621	0.700333	1	0
ENSMUSG00000026825	Dnm1	0.0518428	0.065241	0.200654	0.0442449	0.432	0.329667	1	0
ENSMUSG00000027012	Dync1i2	0.0522404	0.0249151	0.236168	0.0483899	0.695	0.673667	1	0
ENSMUSG00000087526	Gm15738	0.052268	0.0494187	-0.119667	0.078372	0.379	0.5	1	0
ENSMUSG00000052040	Klf13	0.0523805	0.0656195	0.170867	0.029092	0.184	0.110667	1	0
ENSMUSG00000048038	Ccdc187	0.0527025	0.0380426	0.152658	0.012384	0.263	0.184333	1	0
ENSMUSG00000033671	Cep350	0.0527797	0.0532321	-0.176427	0.0321546	0.263	0.354333	1	0
ENSMUSG00000102758	Naaladl2	0.0529484	0.0716172	-0.173672	0.0894597	0.226	0.338333	1	0	SFARI					2	0
ENSMUSG00000039210	Gpatch2	0.0529536	0.0280098	-0.10815	0.0280514	0.116	0.187667	1	0
ENSMUSG00000068015	Lrch1	0.0531033	0.0791703	-0.16114	0.0400542	0.195	0.298667	1	0
ENSMUSG00000057716	Tmem178b	0.0531283	0.0593927	-0.203161	0.0478897	0.911	0.947333	1	0
ENSMUSG00000030683	Sez6l2	0.0535601	0.0294277	0.183226	0.0183002	0.279	0.203667	1	0	SFARI					2	0
ENSMUSG00000038267	Slc22a23	0.0536734	0.0566408	-0.15772	0.0549429	0.2	0.295	1	0
ENSMUSG00000059669	Taf1b	0.0536953	0.0476065	-0.127745	0.049971	0.105	0.180667	1	0
ENSMUSG00000024081	Cebpz	0.0538481	0.0319086	-0.112101	0.0170406	0.168	0.256333	1	0
ENSMUSG00000085284	Gm16189	0.0539116	0.0409321	0.117216	0.019052	0.111	0.0543333	1	0
ENSMUSG00000034687	Fras1	0.0539839	0.0604272	-0.247211	0.0889635	0.463	0.553	1	0
ENSMUSG00000031731	Ap1g1	0.0540777	0.0177853	-0.114628	0.00293806	0.242	0.338667	1	0
ENSMUSG00000036613	Eipr1	0.0540787	0.0325598	-0.111833	0.0259683	0.142	0.221333	1	0
ENSMUSG00000021910	Nisch	0.0542826	0.0530282	0.235804	0.0290679	0.542	0.466667	1	0
ENSMUSG00000054162	Spock3	0.0546501	0.0433587	-0.275463	0.0603705	0.795	0.821	1	0
ENSMUSG00000029528	Pxn	0.0547926	0.0649443	0.0756531	0.0182845	0.1	0.044	1	0
ENSMUSG00000024393	Prrc2a	0.0552538	0.0359457	0.119356	0.0157163	0.174	0.105333	1	0
ENSMUSG00000057335	Cep170	0.0563731	0.0495828	-0.143129	0.0244318	0.247	0.337	1	0
ENSMUSG00000039934	Gsap	0.0566563	0.0355771	0.0717602	0.00820638	0.105	0.0506667	1	0
ENSMUSG00000024955	Esrra	0.0566618	0.0255118	0.0747311	0.012101	0.132	0.0703333	1	0
ENSMUSG00000016349	Eef1a2	0.0567286	0.075094	0.158157	0.0482461	0.221	0.140333	1	0	SFARI						1
ENSMUSG00000021546	Hnrnpk	0.0569277	0.0525304	0.109869	0.0325482	0.368	0.259667	1	0	SFARI					2	1
ENSMUSG00000015671	Psma2	0.0569817	0.050479	-0.114214	0.0283533	0.074	0.135	1	0
ENSMUSG00000023972	Ptk7	0.057006	0.0440771	0.106687	0.0216222	0.126	0.065	1	0	SFARI					1	0
ENSMUSG00000026623	Lpgat1	0.0571246	0.0322496	0.198163	0.0202357	0.395	0.303333	1	0
ENSMUSG00000028093	Acp6	0.0571814	0.0494371	0.0963382	0.0144309	0.147	0.0826667	1	0
ENSMUSG00000025609	Mkln1	0.0573126	0.0368663	-0.144959	0.0577775	0.368	0.481	1	0
ENSMUSG00000021219	Rgs6	0.0576522	0.036367	0.235546	0.0142151	0.205	0.133	1	0
ENSMUSG00000035337	Uchl4	0.0579625	0.047311	0.103919	0.019052	0.116	0.0576667	1	0
ENSMUSG00000060882	Kcnd2	0.0579998	0.0209492	0.162236	0.0263762	1	0.998333	1	0	SFARI					2	0
ENSMUSG00000040940	Arhgef1	0.0581892	0.0143191	0.10189	0.0263539	0.184	0.114333	1	0
ENSMUSG00000031930	Wwp2	0.0582371	0.0728883	0.123443	0.0329799	0.137	0.0716667	1	0
ENSMUSG00000024462	Gabbr1	0.0585559	0.0653407	0.161558	0.069024	0.574	0.461667	1	0
ENSMUSG00000032637	Atxn2l	0.0586703	0.0734352	0.1749	0.021975	0.247	0.167	1	0
ENSMUSG00000022498	Txndc11	0.0589928	0.0522105	-0.150588	0.0276607	0.174	0.251	1	0
ENSMUSG00000028528	Dnajc6	0.059464	0.017838	-0.151939	0.0166694	0.321	0.416	1	0
ENSMUSG00000024109	Nrxn1	0.0594644	0.0685298	-0.133573	0.0592795	1	1	1	0	SFARI;EAGLE		Definitive	143.75	Concordant	1	0
ENSMUSG00000026245	Farsb	0.0596123	0.0241025	-0.103654	0.0172755	0.168	0.256	1	0
ENSMUSG00000056222	Spock1	0.0596355	0.0728536	-0.17254	0.0950059	0.579	0.657667	1	0
ENSMUSG00000030259	Rassf8	0.0598859	0.0256975	-0.111161	0.0133411	0.074	0.133333	1	0
ENSMUSG00000005621	Zfp592	0.0602559	0.0418368	0.107492	0.018498	0.126	0.067	1	0
ENSMUSG00000022208	Jph4	0.0603467	0.0211102	0.189991	0.00927216	0.384	0.310667	1	0
ENSMUSG00000054766	Set	0.0609415	0.0100902	0.104505	0.00677327	0.163	0.0983333	1	0	SFARI					2	0
ENSMUSG00000041014	Nrg3	0.0613709	0.0534191	-0.225394	0.0616243	0.995	0.989	1	0
ENSMUSG00000108532	Gm32647	0.0614355	0.052704	-0.151006	0.044295	0.121	0.2	1	0
ENSMUSG00000017478	Zc3h18	0.061677	0.0253894	-0.0680541	0.00664842	0.068	0.128333	1	0
ENSMUSG00000097466	D430036J16Rik	0.0617687	0.058759	-0.0877138	0.0262341	0.074	0.138667	1	0
ENSMUSG00000039952	Dag1	0.0617847	0.0368001	0.149214	0.0388651	0.279	0.2	1	0
ENSMUSG00000115718	Gm49179	0.0619791	0.0400876	0.131922	0.0183204	0.142	0.0803333	1	0
ENSMUSG00000042225	Ammecr1	0.0620595	0.0425751	-0.10815	0.0280514	0.111	0.180667	1	0
ENSMUSG00000028197	Col24a1	0.0621391	0.0461601	0.135787	0.0311637	0.105	0.051	1	0
ENSMUSG00000021725	Parp8	0.0621919	0.061997	0.199761	0.0195995	0.311	0.238333	1	0
ENSMUSG00000030741	Spns1	0.0627474	0.0825051	0.130942	0.0215919	0.126	0.065	1	0
ENSMUSG00000026305	Lrrfip1	0.0629704	0.0665733	-0.152992	0.0166443	0.289	0.387667	1	0
ENSMUSG00000031561	Tenm3	0.0633795	0.0406104	0.271995	0.0312209	0.553	0.498333	1	0
ENSMUSG00000020070	Rufy2	0.0637514	0.0484846	0.202536	0.0396009	0.384	0.3	1	0
ENSMUSG00000022044	Stmn4	0.0638271	0.0412103	-0.104648	0.0226795	0.068	0.126667	1	0
ENSMUSG00000046699	Slitrk4	0.0638294	0.0608298	0.10934	0.0373866	0.147	0.0806667	1	0
ENSMUSG00000055835	Zfp1	0.0638648	0.0926311	-0.134595	0.0547346	0.105	0.184333	1	0
ENSMUSG00000086859	Snhg20	0.0638787	0.0173856	0.13521	0.00336542	0.295	0.214	1	0
ENSMUSG00000044712	Slc38a6	0.0641046	0.0956305	-0.127628	0.0550566	0.111	0.191333	1	0
ENSMUSG00000037926	Ssh2	0.0641638	0.00696524	-0.166797	0.0135004	0.589	0.673667	1	0
ENSMUSG00000028020	Glrb	0.0643224	0.029506	-0.0833144	0.0133632	0.253	0.347333	1	0
ENSMUSG00000040606	Kazn	0.0651158	0.0689569	-0.100364	0.0603149	0.837	0.891	1	0
ENSMUSG00000041935	AW549877	0.0652002	0.0548895	-0.0996232	0.0482646	0.058	0.122667	1	0
ENSMUSG00000026409	Pfkfb2	0.0660205	0.0178723	0.0599327	0.00407307	0.1	0.049	1	0
ENSMUSG00000025151	Maged1	0.0661442	0.0132316	0.183643	0.006216	0.363	0.280667	1	0
ENSMUSG00000029775	Klhdc10	0.0662605	0.0690544	-0.133454	0.0342713	0.3	0.412333	1	0
ENSMUSG00000028883	Sema3a	0.0668387	0.0353697	-0.0398569	0.068118	0.189	0.282667	1	0
ENSMUSG00000087086	Gm13269	0.0668905	0.0532931	-0.0693644	0.0483532	0.226	0.335333	1	0
ENSMUSG00000026970	Rbms1	0.0670662	0.0393172	-0.207679	0.0233678	0.274	0.356	1	0
ENSMUSG00000040415	Dtx3	0.0673908	0.0537202	0.213703	0.0461033	0.342	0.261333	1	0
[truncated: 4,681 more rows]

## Sheet: Interneuron
ensembl	gene	p_val.mean	p_val.std	avg_log2FC.mean	avg_log2FC.std	pct.1.mean	pct.2.mean	padj.mean	padj.std	ASD.status	TADA.FDR	EAGLE.annotation	EAGLE.score	EAGLE.concordance	SFARI.score	SFARI.syndromic
[truncated: 7,048 more rows]

[truncated: 5 more sheets: Astrocyte, Microglia, Oligodendrocyte, Polydendrocyte, Pseudo-bulk]
