# Supplementary material for: An X-linked long non-coding RNA, PTCHD1-AS, regulates autistic behaviors in humans and in mice
Source: Research Square preprint supplement (doi:10.21203/rs.3.rs-5619348/v1), 2025-01-13
Supplement: Supplementary file 25 [file Supplementary Table 8.xlsx]

## Sheet: D1_MSN
ensembl	gene	p_val.mean	p_val.std	avg_log2FC.mean	avg_log2FC.std	pct.1.mean	pct.2.mean	padj.mean	padj.std	ASD.status	TADA.FDR	EAGLE.annotation	EAGLE.score	EAGLE.concordance	SFARI.score	SFARI.syndromic
ENSMUSG00000092341	Malat1	3.26518e-19	3.77615e-19	-0.288762	0.000990338	1	1	8.10939e-15	9.37844e-15
ENSMUSG00000098973	Mir6236	9.62016e-13	6.67538e-13	0.513079	0.0231334	0.892	0.837	2.38926e-08	1.6579e-08
ENSMUSG00000001270	Ckb	1.17558e-11	1.58027e-11	0.495181	0.00746144	0.794	0.674	2.91966e-07	3.92475e-07
ENSMUSG00000022748	Cmss1	6.76738e-10	3.91827e-10	0.420272	0.00972892	0.873	0.807	1.68075e-05	9.73142e-06
ENSMUSG00000021268	Meg3	9.08913e-09	5.84972e-09	0.213518	0.00881927	1	1	0.000225738	0.000145284
ENSMUSG00000060924	Csmd1	1.22518e-08	1.59507e-08	-0.195823	0.00838949	1	1	0.000304286	0.000396153	SFARI					2	0
ENSMUSG00000068696	Gpr88	9.46446e-08	1.26099e-07	0.356324	0.027573	0.571	0.393	0.00235059	0.0031318
ENSMUSG00000031833	Mast3	9.70418e-08	6.85682e-08	0.350788	0.00557455	0.571	0.412	0.00241013	0.00170296	SFARI					3	0
ENSMUSG00000019505	Ubb	2.00431e-07	1.44334e-07	0.421482	0.00911426	0.545	0.412	0.0049779	0.00358468
ENSMUSG00000038128	Camk4	4.03169e-07	4.59553e-07	-0.23679	0.0235094	0.901	0.976	0.0100131	0.0114135	SFARI					2	0
ENSMUSG00000057666	Gapdh	5.56851e-07	1.38554e-07	0.353735	0.010387	0.493	0.358	0.01383	0.00344113
ENSMUSG00000035202	Lars2	6.3385e-07	3.10784e-07	0.334681	0.0119939	0.5845	0.433	0.0157423	0.00771863
ENSMUSG00000023944	Hsp90ab1	6.88477e-07	9.72006e-07	0.35271	0.064479	0.587	0.43	0.017099	0.0241408
ENSMUSG00000026576	Atp1b1	7.11629e-07	3.26131e-07	0.322941	0.0216511	0.7645	0.658	0.017674	0.00809979
ENSMUSG00000030515	Tarsl2	8.09375e-07	3.05535e-07	-0.188341	0.0024318	0.1135	0.254	0.0201016	0.00758827
ENSMUSG00000040606	Kazn	8.58828e-07	4.02394e-07	-0.303374	0.00601854	0.7365	0.882	0.0213299	0.00999386
ENSMUSG00000002459	Rgs20	1.70976e-06	1.37216e-06	-0.296885	0.00900791	0.6965	0.802	0.0424635	0.034079
ENSMUSG00000008658	Rbfox1	1.75642e-06	1.30837e-06	-0.1849	0.00917991	1	1	0.0436224	0.0324947	SFARI					2	0
ENSMUSG00000001175	Calm1	3.73005e-06	1.73372e-06	0.298116	0.00575376	0.687	0.567	0.0926396	0.0430586
ENSMUSG00000064115	Cadm2	4.95283e-06	4.14087e-06	-0.180825	0.00944125	1	1	0.123009	0.102843	SFARI					2	0
ENSMUSG00000090223	Pcp4	4.96456e-06	2.63337e-06	0.384966	0.0183814	0.607	0.492	0.1233	0.0654024
ENSMUSG00000033510	Otud7a	5.2878e-06	6.21684e-06	-0.274585	0.0358464	0.5695	0.706	0.131328	0.154401	SFARI					2	0
ENSMUSG00000021936	Mapk8	5.47622e-06	7.21277e-06	-0.188511	0.0325172	0.2635	0.439	0.136008	0.179136
ENSMUSG00000045404	Kcnk13	6.90313e-06	6.79899e-06	-0.238628	0.00978559	0.1	0.219	0.171446	0.16886
ENSMUSG00000010721	Lmbr1	7.39489e-06	8.5244e-07	-0.229482	0	0.2045	0.348	0.183659	0.0211712
ENSMUSG00000026657	Frmd4a	7.94483e-06	7.61869e-06	-0.317313	0.021303	0.664	0.778	0.197318	0.189218
ENSMUSG00000029713	Gnb2	9.76122e-06	1.34903e-05	0.265764	0.0371001	0.4825	0.329	0.24243	0.335045	SFARI						1
ENSMUSG00000026610	Esrrg	1.14413e-05	1.4479e-05	-0.261227	0.00927406	0.473	0.626	0.284156	0.3596
ENSMUSG00000024121	Atp6v0c	1.15704e-05	1.5291e-05	0.331039	0.0246158	0.567	0.43	0.287362	0.379767
ENSMUSG00000044667	Plppr4	1.17461e-05	1.57546e-05	0.292321	0.0240916	0.813	0.735	0.291727	0.39128
ENSMUSG00000026204	Ptprn	1.1833e-05	1.53255e-05	0.294136	0.0379415	0.7925	0.725	0.293885	0.380624
ENSMUSG00000038267	Slc22a23	1.20779e-05	1.39703e-05	-0.242308	0.0194627	0.4625	0.61	0.299966	0.346966
ENSMUSG00000017491	Rarb	1.42165e-05	2.00176e-05	-0.224239	0.0384075	0.9415	0.989	0.353082	0.497157
ENSMUSG00000039478	Micu3	1.43846e-05	2.31347e-06	-0.211382	0.00190502	0.3265	0.479	0.357255	0.0574573
ENSMUSG00000052551	Adarb2	1.71711e-05	6.68265e-06	-0.294775	0.00200224	0.242	0.382	0.426463	0.16597
ENSMUSG00000068923	Syt11	1.83738e-05	8.29555e-06	0.271804	0.00137393	0.5965	0.471	0.456331	0.206028
ENSMUSG00000020719	Ddx5	1.954e-05	1.03278e-05	0.216816	0.00554288	0.9825	0.984	0.485296	0.256501
ENSMUSG00000039220	Ppp1r10	2.06562e-05	2.79048e-05	-0.172952	0.018892	0.131	0.262	0.511481	0.69087
ENSMUSG00000062647	Rpl7a	2.40086e-05	2.71877e-05	0.166195	0.0272053	0.175	0.072	0.559408	0.623091
ENSMUSG00000054728	Phactr1	2.42511e-05	3.15355e-05	-0.169269	0.0246743	1	1	0.524241	0.672824
ENSMUSG00000029432	Nipsnap2	2.45357e-05	1.60632e-05	-0.18705	0.00677836	0.187	0.321	0.609368	0.398945
ENSMUSG00000093387	Gm20732	2.64864e-05	1.37677e-05	-0.159697	0.011821	0.1325	0.257	0.657816	0.341934
ENSMUSG00000101930	Gm5441	3.0518e-05	4.105e-05	-0.200293	0.031254	0.1845	0.324	0.518519	0.680917
ENSMUSG00000024661	Fth1	3.14312e-05	2.76509e-05	0.263246	0.0116209	0.4275	0.291	0.647515	0.498489
ENSMUSG00000041308	Sntb2	3.20177e-05	3.24383e-05	-0.184884	0.00877167	0.369	0.537	0.61276	0.54764
ENSMUSG00000060636	Rpl35a	3.77059e-05	2.2723e-05	0.205307	0.00832772	0.2405	0.128	0.768704	0.327102
ENSMUSG00000060126	Tpt1	4.15738e-05	5.73743e-05	0.178825	0.0364757	0.234	0.112	0.512468	0.689475
ENSMUSG00000040385	Ppp1ca	4.88179e-05	4.89548e-05	0.194833	0.0139884	0.29	0.166	0.676356	0.457702
ENSMUSG00000038696	Mapkap1	5.15509e-05	1.48994e-05	-0.183138	0.00595994	0.303	0.447	1	0
ENSMUSG00000026864	Hspa5	5.60059e-05	4.16058e-05	0.21467	0.0172746	0.325	0.201	0.830148	0.240208
ENSMUSG00000064043	Trerf1	6.13432e-05	4.41452e-05	-0.212114	0.017346	0.698	0.845	0.874127	0.178012
ENSMUSG00000051177	Plcb1	6.60199e-05	4.49385e-06	-0.189747	0.00592708	1	0.997	1	0	SFARI					2	0
ENSMUSG00000023118	Sympk	6.73255e-05	7.4614e-05	-0.16928	0.0178195	0.191	0.321	0.680874	0.451313
ENSMUSG00000061576	Dpp6	8.04384e-05	0.000111959	-0.23129	0.0609533	0.902	0.949	0.515791	0.684775	SFARI					2	0
ENSMUSG00000026782	Abi2	8.29955e-05	9.45888e-05	-0.199031	0.00565176	0.723	0.826	0.700068	0.424169
ENSMUSG00000020962	Gtf2a1	8.46456e-05	0.000113641	-0.163967	0.0257093	0.1445	0.27	0.553263	0.631781
ENSMUSG00000070493	Chchd2	8.6303e-05	1.79392e-07	0.189148	0.00203824	0.267	0.155	1	0
ENSMUSG00000033161	Atp1a1	8.86812e-05	0.000106459	0.217067	0.0155486	0.4295	0.291	0.666442	0.471722	SFARI					2	1
ENSMUSG00000027651	Rprd1b	8.90844e-05	8.60964e-06	-0.14118	0.00476702	0.1325	0.246	1	0
ENSMUSG00000036298	Slc2a13	9.19226e-05	0.000128834	-0.280165	0.0713398	0.7635	0.84	0.510224	0.692648
ENSMUSG00000018417	Myo1b	0.000101738	4.67071e-05	-0.186718	0.0100672	0.444	0.583	1	0
ENSMUSG00000034066	Farp2	0.00010671	3.78301e-05	-0.149657	0.00474484	0.1295	0.241	1	0
ENSMUSG00000033569	Adgrb3	0.000115052	0.000134914	0.16362	0.0225957	1	1	0.74406	0.361954
ENSMUSG00000060510	Zfp266	0.000115995	0.000151684	-0.143335	0.00906797	0.156	0.283	0.608512	0.553647
ENSMUSG00000022789	Dnm1l	0.000118561	8.08511e-05	-0.208162	0.017589	0.409	0.535	1	0
ENSMUSG00000033307	Mif	0.000124629	0.000158288	0.178152	0.012699	0.226	0.115	0.657738	0.484032
ENSMUSG00000017485	Top2b	0.000125463	9.01003e-06	-0.157375	0.0034581	0.408	0.553	1	0	SFARI					2	0
ENSMUSG00000020903	Stx8	0.000126529	0.000170895	-0.16007	0.0348204	0.1445	0.267	0.570633	0.607217
ENSMUSG00000030621	Me3	0.000127687	0.000178422	-0.26929	0.0371001	0.6285	0.749	0.518914	0.680358
ENSMUSG00000039531	Zup1	0.000129345	9.03181e-05	-0.162205	0.00466884	0.148	0.262	1	0
ENSMUSG00000100826	Snhg14	0.000130051	0.000150695	0.160131	0.0146846	0.972	0.992	0.791735	0.294532
ENSMUSG00000029169	Dhx15	0.000139115	0.00014559	-0.179878	0.018056	0.2875	0.428	0.949126	0.0719468
ENSMUSG00000040640	Erc2	0.000144057	0.000145713	-0.166864	0.00703768	0.9905	1	1	0
ENSMUSG00000032036	Kirrel3	0.000151783	7.55263e-06	-0.242993	0.0148207	0.8705	0.88	1	0	SFARI					2	0
ENSMUSG00000029763	Exoc4	0.000152138	0.00018544	-0.234988	0.0232434	0.7875	0.88	0.760929	0.338097
ENSMUSG00000032936	Camkv	0.000158989	3.22648e-06	0.221719	0.000952956	0.7965	0.738	1	0
ENSMUSG00000025326	Ube3a	0.000161147	0.000162769	-0.186088	0.0146623	0.7475	0.842	1	0	SFARI					1	1
ENSMUSG00000058761	Rnf169	0.00016242	1.57911e-05	-0.157639	0	0.2925	0.43	1	0
ENSMUSG00000035885	Cox8a	0.00016361	0.000229317	0.288096	0.0354427	0.386	0.262	0.518114	0.68149
ENSMUSG00000029815	Malsu1	0.0001644	7.7966e-05	-0.109239	0.00764153	0.0655	0.152	1	0
ENSMUSG00000021270	Hsp90aa1	0.000167416	8.12641e-05	0.228211	0.023247	0.3625	0.243	1	0
ENSMUSG00000087402	Gm11867	0.000181324	0.000161311	0.192622	0.0114196	0.357	0.241	1	0
ENSMUSG00000022199	Slc22a17	0.000181391	3.14436e-05	0.255554	0.00529944	0.6325	0.521	1	0
ENSMUSG00000028274	Rngtt	0.000184163	0.000252708	-0.18653	0.0337577	0.3505	0.492	0.567943	0.611021
ENSMUSG00000027346	Gpcpd1	0.000189167	0.000163191	-0.170366	0.00186668	0.353	0.489	1	0
ENSMUSG00000061518	Cox5b	0.000190595	0.000234267	0.186207	0.0301541	0.282	0.166	0.80974	0.269068
ENSMUSG00000006651	Aplp1	0.000192491	0.000109302	0.251884	0.0140905	0.5575	0.463	1	0
ENSMUSG00000025537	Phkg1	0.000201123	0.000230233	0.284399	0.0483569	0.206	0.107	0.975898	0.0340855
ENSMUSG00000079056	Kcnip3	0.000202144	0.000221947	-0.181247	0.0222438	0.286	0.42	1	0
ENSMUSG00000038119	Cdon	0.000205538	1.88334e-05	-0.156568	0.0137549	0.1535	0.265	1	0	SFARI					3	0
ENSMUSG00000029673	Auts2	0.000211988	0.000113773	-0.153456	0.00143412	1	1	1	0	SFARI;EAGLE;TADA	0.0046251	Definitive	35.5	Concordant	1	0
ENSMUSG00000022602	Arc	0.000224608	0.000171941	0.153089	0.00933773	0.116	0.043	1	0
ENSMUSG00000040820	Hlcs	0.000251522	0.000263883	-0.170599	0.00426837	0.2205	0.35	1	0
ENSMUSG00000066392	Nrxn3	0.000253202	0.000315361	-0.144253	0.0137909	1	1	0.875133	0.176589	SFARI;EAGLE		Moderate	11.1	Discordant	1	0
ENSMUSG00000030199	Etv6	0.000254515	0.000299883	-0.159135	0.0137241	0.1535	0.27	1	0
ENSMUSG00000047409	Ctdspl	0.000262567	0.000193709	-0.184584	0.0196502	0.4615	0.575	1	0
ENSMUSG00000096768	Gm47283	0.000262698	0.000105928	-0.193357	0.0151979	0.3355	0.46	1	0
ENSMUSG00000035864	Syt1	0.000269293	5.89579e-05	-0.16297	0.00308853	0.995	0.995	1	0	SFARI;TADA	0.016653					1
ENSMUSG00000057060	Slc35f3	0.000272747	3.55771e-05	-0.21708	0.00404016	0.7805	0.85	1	0
ENSMUSG00000040907	Atp1a3	0.000273817	0.000347226	0.252818	0.032122	0.5725	0.468	0.851317	0.21027	SFARI					2	1
ENSMUSG00000020458	Rtn4	0.000274185	2.52563e-06	0.21369	0.0118699	0.6295	0.524	1	0
ENSMUSG00000020648	Dus4l	0.000276477	0.000359935	-0.114799	0.0129956	0.0465	0.126	0.772761	0.321364
ENSMUSG00000097466	D430036J16Rik	0.000279066	0.000380165	-0.163125	0.023029	0.1575	0.275	0.627275	0.527113
ENSMUSG00000091947	6530401F13Rik	0.000285663	0.000114286	-0.100029	0	0.0415	0.112	1	0
ENSMUSG00000059890	Ube4a	0.000298923	9.09074e-05	-0.143198	0.0044354	0.1915	0.307	1	0
ENSMUSG00000024404	Riok3	0.000308983	8.66686e-05	-0.132907	0.00216361	0.218	0.34	1	0
ENSMUSG00000028676	Srsf10	0.000324805	0.000223339	-0.14774	0.00862702	0.223	0.348	1	0
ENSMUSG00000021182	Ccdc88c	0.000331093	0.000105279	-0.190356	0.00287769	0.5615	0.695	1	0	SFARI					2	0
ENSMUSG00000033900	Map9	0.000339949	0.000274269	-0.137355	0.00736566	0.108	0.203	1	0
ENSMUSG00000057378	Ryr3	0.000343012	0.000395441	-0.159863	0.0198889	0.9985	0.997	1	0
ENSMUSG00000112308	Gm48512	0.000354637	0.00017268	-0.135791	0.00894865	0.1735	0.289	1	0
ENSMUSG00000020262	Adarb1	0.000364879	0.000189245	-0.163639	0.0144119	0.274	0.398	1	0
ENSMUSG00000074505	Fat3	0.000381855	0.000365827	-0.20573	0.0145245	0.8395	0.933	1	0
ENSMUSG00000023826	Prkn	0.000383864	0.000325059	-0.175586	0.0209482	0.722	0.848	1	0	SFARI					2	0
ENSMUSG00000054885	4930578G10Rik	0.000389557	0.000405868	-0.186339	0.00792345	0.2915	0.417	1	0
ENSMUSG00000045776	Lrtm1	0.000399854	0.000563442	-0.192434	0.0635111	0.404	0.559	0.517881	0.681819
ENSMUSG00000024966	Stip1	0.000399938	0.000233692	0.144062	0	0.197	0.104	1	0
ENSMUSG00000027827	Kcnab1	0.000402285	0.000553577	-0.220913	0.0421999	0.963	0.987	0.634697	0.516616
ENSMUSG00000020672	Sntg2	0.000405463	0.000287904	-0.196079	0	0.3705	0.5	1	0	SFARI					2	0
ENSMUSG00000056258	Kcnq3	0.000408217	0.000462724	-0.20426	0.0226367	0.894	0.925	1	0	SFARI;EAGLE;TADA	0.00084541	Moderate	11.1	Discordant	1	0
ENSMUSG00000024983	Vti1a	0.000430713	0.000563597	-0.186361	0.0367959	0.4455	0.58	0.899728	0.141806
ENSMUSG00000061762	Tac1	0.000447738	0.000238664	0.342675	0.0253828	0.7045	0.634	1	0
ENSMUSG00000029823	Luc7l2	0.000463342	0.000515192	-0.175679	0.0289541	0.876	0.936	1	0
ENSMUSG00000025078	Nhlrc2	0.000483385	0.000635127	-0.11054	0.0152262	0.067	0.152	0.925723	0.105044
ENSMUSG00000030846	Tial1	0.000514797	0.000655253	-0.190495	0.0255848	0.4855	0.62	1	0
ENSMUSG00000029817	Tra2a	0.000527591	0.000397481	-0.187322	0.00836871	0.4455	0.57	1	0
ENSMUSG00000039601	Rcan2	0.000573836	1.6006e-05	-0.197255	0.00474484	0.7005	0.797	1	0
ENSMUSG00000037653	Kctd8	0.000581168	0.000176677	0.269935	0.0328098	0.7005	0.634	1	0
ENSMUSG00000021972	Hmbox1	0.000601717	0.000387614	-0.160558	0.0124517	0.396	0.521	1	0
ENSMUSG00000031540	Kat6a	0.000612309	0.000709908	-0.117044	0.0191481	0.2285	0.353	1	0	SFARI					2	1
ENSMUSG00000021686	Ap3b1	0.000613284	0.000782359	-0.16906	0.0153696	0.332	0.455	1	0
ENSMUSG00000046432	Bex3	0.000633134	0.000692107	0.120183	0.0156432	0.201	0.107	1	0
ENSMUSG00000038127	Ccdc50	0.000641451	0.000229102	-0.118463	0.00498847	0.0895	0.174	1	0
ENSMUSG00000046709	Mapk10	0.00064155	0.000212208	-0.197277	0	0.6925	0.786	1	0
ENSMUSG00000066189	Cacng3	0.000647872	0.00056117	-0.254572	0.0311001	0.6015	0.679	1	0
ENSMUSG00000022884	Eif4a2	0.000668714	0.000394268	0.197164	0.0125834	0.3825	0.278	1	0
ENSMUSG00000021098	4930447C04Rik	0.00067388	7.22854e-05	-0.128369	0.0072095	0.094	0.179	1	0
ENSMUSG00000030064	Frmd4b	0.000681489	0.000500757	-0.236222	0.00772252	0.48	0.588	1	0
ENSMUSG00000021318	Gli3	0.000681851	0.000893729	-0.241091	0.0403705	0.286	0.409	1	0
ENSMUSG00000011960	Ccnt1	0.000703266	0.000790792	-0.132282	0.0182173	0.174	0.283	1	0
ENSMUSG00000021189	Atxn3	0.000720397	0.000920356	-0.136236	0.020891	0.1495	0.257	1	0
ENSMUSG00000045302	Preb	0.000743885	0.000768051	-0.105478	0.0291168	0.1735	0.289	1	0
ENSMUSG00000087177	E130307A14Rik	0.000767528	0.00024462	-0.174153	0	0.322	0.439	1	0
ENSMUSG00000064210	Ano6	0.000793567	1.73373e-05	-0.155145	0.00185311	0.357	0.489	1	0
ENSMUSG00000021730	Hcn1	0.000796427	0.000932607	-0.333879	0.021078	0.1695	0.27	1	0	SFARI						1
ENSMUSG00000047141	Zfp654	0.000803796	0.000103829	-0.152007	0.00444506	0.201	0.305	1	0
ENSMUSG00000045078	Rnf216	0.000830489	0.000718739	-0.14308	0.0147391	0.234	0.348	1	0
ENSMUSG00000027797	Dclk1	0.000839779	0.000210157	-0.153022	0.00216055	0.87	0.939	1	0
ENSMUSG00000032330	Cox7a2	0.000840819	0.000171361	0.16698	0.00208404	0.2445	0.152	1	0
ENSMUSG00000038115	Ano2	0.000853907	0.000627995	-0.174263	0.00534572	0.373	0.495	1	0
ENSMUSG00000047714	Ppp1r2	0.000856108	0.00112573	-0.21169	0.0397418	0.54	0.668	1	0
ENSMUSG00000031657	Heatr3	0.000862514	0.000377755	-0.104112	0.00462649	0.1415	0.243	1	0
ENSMUSG00000060176	Kif27	0.000862725	0.000598139	-0.105698	0.0123058	0.0935	0.179	1	0
ENSMUSG00000036782	Klhl13	0.00088332	0.00111479	-0.179896	0.0175386	0.2915	0.414	1	0
ENSMUSG00000042705	Commd10	0.00097901	0.00127215	-0.178704	0.0270942	0.254	0.372	1	0
ENSMUSG00000038301	Snx10	0.000980017	0.00126244	-0.160253	0.0436824	0.254	0.372	1	0
ENSMUSG00000020627	Klhl29	0.000989434	0.000623274	-0.181052	0.0161553	0.798	0.853	1	0
ENSMUSG00000071528	Atp5md	0.000990681	0.00137254	0.192102	0.0447416	0.3155	0.206	0.750238	0.353217
ENSMUSG00000028341	Nr4a3	0.000998163	0.00108551	0.14703	0.0162854	0.1085	0.043	1	0
ENSMUSG00000037533	Rapgef6	0.000999901	0.000830903	-0.179694	0.0150962	0.7275	0.791	1	0
ENSMUSG00000025790	Slco3a1	0.001021	0.000285633	-0.137652	0.00229503	0.1725	0.27	1	0
ENSMUSG00000021635	Rad17	0.00103034	0.00093434	-0.119455	0.0117394	0.1445	0.243	1	0
ENSMUSG00000039652	Cpeb3	0.00104234	0.00134137	-0.144081	0.0358988	0.4945	0.658	1	0
ENSMUSG00000042734	Ttc9	0.00104288	0.00104982	-0.0912716	0.00783722	0.044	0.11	1	0
ENSMUSG00000021911	Parg	0.00106599	0.00144242	-0.14041	0.0268202	0.2555	0.385	1	0
ENSMUSG00000021244	Ylpm1	0.0010736	0.00016894	-0.165037	0.00396685	0.6375	0.725	1	0
ENSMUSG00000029787	Avl9	0.00107518	0.000253961	-0.134931	0.00235326	0.143	0.235	1	0
ENSMUSG00000012422	Tmem167	0.00111315	0.000897467	-0.147482	0.00914929	0.1765	0.275	1	0
ENSMUSG00000015656	Hspa8	0.00112035	0.000729844	0.248449	0.00750658	0.4865	0.404	1	0
ENSMUSG00000031059	Ndufb11	0.00114216	0.000232938	0.115201	0.00233709	0.1455	0.072	1	0
ENSMUSG00000039068	Zzz3	0.00114387	0.00114045	-0.143883	0.0164542	0.2525	0.369	1	0
ENSMUSG00000061911	Myt1l	0.00115314	0.000676946	-0.161267	0.00748624	0.96	0.971	1	0	SFARI;EAGLE;TADA	7.02e-08	Definitive	20.35	Concordant	1	0
ENSMUSG00000053580	Tanc2	0.00116671	0.000966866	-0.159864	0.0113834	0.9155	0.955	1	0	SFARI;EAGLE;TADA	0.00200495	Definitive	24.95	Concordant	1	1
ENSMUSG00000059439	Bcas3	0.00117015	0.00124166	-0.185092	0.0113983	0.5605	0.693	1	0
ENSMUSG00000039419	Cntnap2	0.00117895	0.000591174	-0.254289	0.020416	0.9985	1	1	0	SFARI;EAGLE		Refuted	—	Discordant	2	1
ENSMUSG00000045573	Penk	0.00120021	0.000804236	0.248795	0.0121206	0.175	0.096	1	0
ENSMUSG00000052146	Rps10	0.00126111	0.00132758	0.0904496	0.0121591	0.119	0.051	1	0
ENSMUSG00000031327	Chic1	0.00126644	0.000138958	-0.119978	0.0022396	0.1855	0.289	1	0
ENSMUSG00000008668	Rps18	0.00128396	0.00172179	0.129252	0.0276353	0.163	0.08	1	0
ENSMUSG00000061904	Slc25a3	0.00128721	0.00180672	0.272238	0.0349934	0.635	0.57	0.620022	0.53737
ENSMUSG00000024548	Setbp1	0.00130244	0.000113195	-0.170571	0.0111318	0.4735	0.586	1	0	SFARI					1	0
ENSMUSG00000057069	Ero1b	0.00134071	0.000807778	-0.11024	0.00506274	0.0775	0.152	1	0
ENSMUSG00000029580	Actb	0.00135374	0.00116772	0.187762	0.0237252	0.52	0.409	1	0	SFARI;EAGLE		Limited	1	Discordant	1	1
ENSMUSG00000040594	Ranbp17	0.00135602	0.00161931	-0.191804	0.0250573	0.369	0.487	1	0	SFARI					2	0
ENSMUSG00000074305	Peak1	0.00136259	0.000716712	-0.175634	0.0144703	0.3665	0.484	1	0
ENSMUSG00000028328	Tmod1	0.00136381	0.000268496	-0.130938	0.00199831	0.291	0.409	1	0
ENSMUSG00000085247	4930545L23Rik	0.00136783	0.00186977	-0.15458	0.0261031	0.1935	0.307	1	0
ENSMUSG00000038807	Rap1gap2	0.00137577	0.00150218	-0.125846	0.0177035	0.195	0.305	1	0
ENSMUSG00000060882	Kcnd2	0.00140773	0.00168696	-0.12089	0.0135921	1	1	1	0	SFARI					2	0
ENSMUSG00000058444	Map2k5	0.00141091	0.00153588	-0.13168	0.0198864	0.3035	0.425	1	0
ENSMUSG00000026737	Pip4k2a	0.00145043	0.00169013	-0.112402	0.00209259	0.214	0.337	1	0
ENSMUSG00000111068	Gm35501	0.00145693	0.000935162	-0.0949015	0.00756596	0.075	0.15	1	0
ENSMUSG00000020173	Cobl	0.00147845	0.000604647	-0.13219	0.00161799	0.461	0.583	1	0
ENSMUSG00000022338	Eny2	0.00148447	0.00170053	-0.122329	0.0257684	0.1455	0.243	1	0
ENSMUSG00000056999	Ide	0.00151195	0.000703185	-0.143325	0.00210991	0.234	0.342	1	0
ENSMUSG00000027993	Trim2	0.00152751	0.00115686	-0.131532	0.017698	0.644	0.743	1	0
ENSMUSG00000059586	Nsmce2	0.00153528	6.26068e-05	-0.136083	0.0112104	0.3435	0.457	1	0
ENSMUSG00000062328	Rpl17	0.0015766	0.0015691	0.152298	0.0122664	0.278	0.182	1	0
ENSMUSG00000107872	Gm44511	0.00160672	0.00217784	0.185664	0.0482492	0.5975	0.508	1	0
ENSMUSG00000046753	Ccdc66	0.0016101	0.000683202	-0.140419	0.00453396	0.1765	0.273	1	0
ENSMUSG00000034187	Nsf	0.0016106	0.00117399	-0.146441	0.00984291	0.5585	0.674	1	0
ENSMUSG00000022419	Deptor	0.00163549	0.00230965	-0.139229	0.0382119	0.0685	0.155	0.528754	0.666442
ENSMUSG00000029651	Mtus2	0.0016514	0.00213344	-0.164524	0.0281436	0.4115	0.532	1	0
ENSMUSG00000016150	Tenm1	0.00165619	0.0019977	-0.322906	0.0270849	0.421	0.513	1	0
ENSMUSG00000070687	Htr1d	0.00169385	0.000126908	-0.0919722	0.00516527	0.053	0.118	1	0
ENSMUSG00000062590	Armc9	0.00171509	0.00110554	-0.136472	0.00537388	0.3835	0.5	1	0
ENSMUSG00000061143	Maml3	0.00171624	0.00148347	-0.210229	0.0142679	0.238	0.337	1	0
ENSMUSG00000034610	Tut4	0.00174008	0.00105263	-0.142275	0.00700167	0.548	0.679	1	0
ENSMUSG00000025508	Rplp2	0.00174015	0.00230946	0.172445	0.02321	0.2315	0.139	1	0
ENSMUSG00000042766	Trim46	0.00176794	0.000331613	-0.132413	0.00754266	0.326	0.441	1	0
ENSMUSG00000030695	Aldoa	0.00179496	0.00245829	0.228982	0.0537039	0.456	0.353	1	0
ENSMUSG00000034780	B3galt1	0.00182125	0.000772787	-0.193481	0.00236143	0.925	0.957	1	0
ENSMUSG00000041220	Elovl6	0.00183348	0.000249085	-0.13103	0.00233709	0.143	0.233	1	0
ENSMUSG00000035142	Nubpl	0.0018607	0.000249593	-0.110452	0.00749188	0.0815	0.155	1	0
ENSMUSG00000040928	S100pbp	0.00187736	0.0016132	-0.155376	0.0168066	0.4625	0.564	1	0
ENSMUSG00000052942	Glis3	0.00191473	0.000990887	0.142582	0.0158164	0.1415	0.072	1	0
ENSMUSG00000040724	Kcna2	0.00193314	0.00185297	0.111912	0.0138483	0.159	0.083	1	0	SFARI						1
ENSMUSG00000021003	Galc	0.00194794	0.0022021	-0.148889	0.0226204	0.1845	0.281	1	0
ENSMUSG00000022679	Mpv17l	0.00197701	0.00245409	-0.118411	0.0145391	0.111	0.198	1	0
ENSMUSG00000090116	Gm15680	0.00201424	0.00223256	-0.10845	0.0171456	0.1085	0.193	1	0
ENSMUSG00000034621	Gpatch8	0.0020435	0.00222594	-0.11579	0.0165563	0.809	0.893	1	0
ENSMUSG00000096934	Gm26658	0.00208908	0.00251655	0.116482	0.0232919	0.143	0.07	1	0
ENSMUSG00000033697	Arhgap39	0.00210579	0.00231488	-0.116759	0.0220341	0.201	0.305	1	0
ENSMUSG00000002996	Hbp1	0.00211104	0.00218365	-0.121204	0.00734797	0.1085	0.19	1	0
ENSMUSG00000027692	Tnik	0.00212564	0.000893797	-0.140415	0.000697531	0.902	0.957	1	0
ENSMUSG00000035530	Eif1	0.00212793	0.000907249	0.155274	0.00499661	0.4545	0.353	1	0
ENSMUSG00000071866	Ppia	0.00215075	0.000487311	0.189453	0.00498847	0.4305	0.334	1	0
ENSMUSG00000021720	Rnf180	0.00216907	0.000420619	-0.150792	0.0021409	0.2275	0.326	1	0
ENSMUSG00000039210	Gpatch2	0.00218532	0.00290594	-0.135048	0.0318109	0.171	0.273	1	0
ENSMUSG00000028256	Odf2l	0.00220521	0.000594649	-0.109882	0.00489276	0.1055	0.184	1	0
ENSMUSG00000045624	Esf1	0.002214	0.00260551	-0.104142	0.0138797	0.1485	0.246	1	0
ENSMUSG00000033730	Egr3	0.0022196	0.000260309	0.192386	0.018056	0.2235	0.142	1	0	SFARI					2	0
ENSMUSG00000007892	Rplp1	0.00222333	0.00283287	0.238685	0.00515657	0.3875	0.297	1	0
ENSMUSG00000058589	Anks1b	0.0022298	0.00126705	-0.125752	0.0105004	1	1	1	0	SFARI					2	1
ENSMUSG00000020003	Pex7	0.0022585	0.00206231	-0.140218	0.0153407	0.202	0.299	1	0	SFARI					2	0
ENSMUSG00000026594	Ralgps2	0.00227504	0.000878394	-0.174164	0.00599496	0.2995	0.393	1	0
ENSMUSG00000025917	Cops5	0.00229164	0.00279527	-0.136208	0.0213774	0.1405	0.23	1	0
ENSMUSG00000058318	Phf21a	0.00230083	0.00251777	-0.183586	0.0270797	0.694	0.759	1	0	SFARI;EAGLE;TADA	0.00022532	Limited	5.35	Discordant	1	1
ENSMUSG00000034892	Rps29	0.00231757	0.000884391	0.180742	0.00762725	0.302	0.214	1	0
ENSMUSG00000029657	Hsph1	0.00238187	0.00332686	0.152714	0.0433365	0.369	0.254	0.865404	0.190348
ENSMUSG00000031818	Cox4i1	0.00239684	0.000536644	0.193719	0.0108334	0.356	0.265	1	0
ENSMUSG00000058740	Kcnt1	0.00243922	9.47718e-06	0.227274	0.00544657	0.7275	0.682	1	0
ENSMUSG00000038332	Sesn1	0.00244619	0.00136962	-0.131813	0.00368282	0.353	0.476	1	0
ENSMUSG00000026843	Fubp3	0.0024473	0.00232179	-0.105692	0.0240044	0.1925	0.297	1	0	TADA	0.0808757
ENSMUSG00000022108	Itm2b	0.00249011	0.00330169	0.259859	0.0383889	0.4905	0.414	1	0
ENSMUSG00000024442	Dele1	0.00249109	0.000942867	-0.0843094	0.00261239	0.044	0.102	1	0
ENSMUSG00000028578	Caap1	0.00255133	0.00319144	-0.146117	0.0221778	0.194	0.294	1	0
ENSMUSG00000014850	Msh3	0.00259004	0.00338748	-0.143615	0.0266718	0.1925	0.297	1	0
ENSMUSG00000038418	Egr1	0.00263834	0.00247776	0.145423	0.0064498	0.217	0.134	1	0
ENSMUSG00000027447	Cst3	0.0026697	0.000158462	0.193189	0.0132611	0.2955	0.211	1	0
ENSMUSG00000021448	Shc3	0.00267984	0.00289433	-0.192707	0.0189271	0.352	0.447	1	0
ENSMUSG00000034551	Hdx	0.00272362	0.00339493	-0.121239	0.0217987	0.202	0.31	1	0
ENSMUSG00000057914	Cacnb2	0.00272518	4.78826e-05	-0.176419	0.00909609	0.9705	0.981	1	0	SFARI					2	0
ENSMUSG00000101609	Kcnq1ot1	0.00274162	0.00375127	-0.168169	0.0322076	0.3315	0.455	1	0
ENSMUSG00000075376	Rc3h2	0.00279773	0.00210745	-0.178245	0.0099365	0.4615	0.561	1	0
ENSMUSG00000020982	Nemf	0.00282127	0.000910049	-0.118277	0.0127519	0.241	0.345	1	0
ENSMUSG00000031631	Cfap97	0.0028417	0.000487038	-0.0861577	0.0123058	0.091	0.166	1	0
ENSMUSG00000054280	Prr14l	0.00284811	0.00388392	-0.129537	0.0345843	0.159	0.259	1	0	TADA	0.0546925
ENSMUSG00000030105	Arl8b	0.00287938	0.00121194	-0.116606	0.00686965	0.1735	0.265	1	0
ENSMUSG00000063446	Plppr1	0.00288543	0.00344261	-0.159208	0.0419294	0.746	0.832	1	0
ENSMUSG00000025190	Got1	0.00289194	0.00152884	0.130806	0.00431349	0.231	0.147	1	0
ENSMUSG00000062234	Gak	0.00289801	0.000215662	-0.121096	0.00470111	0.1485	0.233	1	0
ENSMUSG00000019920	Lims1	0.00292333	1.86777e-05	-0.107161	0.00242026	0.107	0.184	1	0
ENSMUSG00000017692	Rhbdl3	0.00295254	0.000134719	-0.130167	0	0.198	0.291	1	0
ENSMUSG00000020524	Gria1	0.00296298	0.00201412	-0.138624	0.0121736	0.948	0.979	1	0	SFARI					2	0
ENSMUSG00000055839	Elob	0.00312717	0.00103032	0.162614	0.00621407	0.2485	0.166	1	0
ENSMUSG00000096929	A330023F24Rik	0.00314354	0.000349623	0.174962	0.00109398	0.7525	0.698	1	0
ENSMUSG00000032267	Usp28	0.0031914	0.0032577	-0.12648	0.0339371	0.234	0.337	1	0
ENSMUSG00000058656	Samd12	0.00322401	0.00211884	-0.14576	0.00735239	0.793	0.874	1	0
ENSMUSG00000031930	Wwp2	0.0032497	0.00279681	-0.114031	0.00729543	0.107	0.184	1	0
ENSMUSG00000029632	Ndufa4	0.00326677	0.00204473	0.182303	0.00581278	0.295	0.211	1	0
ENSMUSG00000041907	Gpr45	0.0032687	0.00242962	-0.11007	0.0142679	0.127	0.209	1	0
ENSMUSG00000073676	Hspe1	0.00328099	0.00243707	0.127277	0.00453396	0.1685	0.096	1	0
ENSMUSG00000038608	Dock10	0.00328405	0.00437475	-0.180012	0.0564413	0.472	0.586	1	0
ENSMUSG00000025586	Cpeb1	0.00329797	0.00220061	-0.0993113	0.00484628	0.111	0.19	1	0
ENSMUSG00000034265	Zdhhc14	0.00331343	0.00357529	-0.12783	0.0207813	0.758	0.85	1	0
ENSMUSG00000021482	Prxl2c	0.00332349	0.0010785	-0.0822631	0.00254717	0.06	0.123	1	0
ENSMUSG00000032518	Rpsa	0.00334303	0.00156371	0.141045	0.00626495	0.25	0.166	1	0
ENSMUSG00000049354	Dcaf7	0.00336316	0.00196952	-0.111969	0.00238629	0.13	0.211	1	0
ENSMUSG00000038388	Pals2	0.0034109	0.000286171	-0.173213	0.00126962	0.607	0.709	1	0
ENSMUSG00000045100	Slc25a26	0.00344222	0.00360858	-0.105613	0.0109107	0.1995	0.299	1	0
ENSMUSG00000024420	Zfp521	0.00347548	0.000927798	-0.148063	0.0021409	0.1955	0.286	1	0
ENSMUSG00000015214	Mtmr1	0.00348048	0.000296615	-0.0936574	0.00612698	0.246	0.348	1	0
ENSMUSG00000057894	Zfp329	0.00352658	0.00343663	-0.101341	0.0125789	0.0805	0.15	1	0
ENSMUSG00000024500	Ppp2r2b	0.00353413	0.000133367	-0.145211	0.000840659	0.805	0.896	1	0
ENSMUSG00000021028	Mbip	0.00354172	0.000862917	-0.128353	0.0129406	0.227	0.318	1	0
ENSMUSG00000044950	Pwwp2a	0.00355296	0.000863214	-0.125534	0.00431349	0.234	0.329	1	0
ENSMUSG00000042750	Bex2	0.00357944	0.00137981	0.126768	0.0108642	0.2115	0.131	1	0
ENSMUSG00000035392	Dennd1a	0.00358047	0.00488943	-0.16589	0.0406889	0.7965	0.869	1	0
ENSMUSG00000022012	Enox1	0.00358782	0.000763135	-0.156805	0.00536446	0.8185	0.917	1	0
ENSMUSG00000027350	Chgb	0.00364786	0.00403819	0.164355	0.0213955	0.3075	0.211	1	0
ENSMUSG00000027035	Cers6	0.00365165	0.0041979	-0.149533	0.0255504	0.365	0.481	1	0
ENSMUSG00000022064	Pibf1	0.00367769	0.00316229	-0.117816	0.00560005	0.332	0.441	1	0
ENSMUSG00000025323	Sp4	0.0036915	0.00199365	-0.104425	0.00900791	0.1765	0.267	1	0
ENSMUSG00000036564	Ndrg4	0.00369633	0.00447558	0.175042	0.00372995	0.83	0.794	1	0
ENSMUSG00000032537	Ephb1	0.00370988	0.00456205	-0.155456	0.0289895	0.714	0.805	1	0	SFARI					3	0
ENSMUSG00000032217	Rnf111	0.00373794	0.00148142	-0.137004	0.00390859	0.317	0.417	1	0
ENSMUSG00000031753	Cog4	0.00387238	9.27344e-06	-0.0802168	0.00238072	0.12	0.201	1	0
ENSMUSG00000026455	Klhl12	0.00387815	0.00340328	-0.120992	0.00964678	0.1175	0.195	1	0
ENSMUSG00000025722	Wdr73	0.00390721	5.67895e-06	-0.0818658	0.00253451	0.07	0.134	1	0
ENSMUSG00000042292	Mrtfa	0.00396776	0.00152407	-0.155259	0.00493219	0.444	0.548	1	0
ENSMUSG00000020176	Grb10	0.00398937	0.0021339	-0.124469	0.00680852	0.171	0.259	1	0	SFARI					3	0
ENSMUSG00000018770	Atp5g3	0.00400998	0.00350282	0.114217	0.00638254	0.246	0.158	1	0
ENSMUSG00000055013	Agap1	0.00403819	0.00110291	-0.161014	0.011335	0.568	0.66	1	0	SFARI					2	0
ENSMUSG00000040896	Kcnd3	0.00405354	0.00289368	-0.124672	0.00736566	0.098	0.168	1	0	SFARI					2	0
ENSMUSG00000061702	Tmem91	0.00409588	0.00253749	-0.137361	0.00702739	0.146	0.227	1	0
ENSMUSG00000032263	Bckdhb	0.00409939	0.00381703	-0.117386	0.012968	0.2075	0.302	1	0
ENSMUSG00002075217	ENSMUSG00002075217	0.00410946	0.000641639	0.13056	0.00670412	0.1805	0.11	1	0
ENSMUSG00000027210	Meis2	0.00413056	0.00240031	-0.141725	0.0063227	0.9625	0.976	1	0	SFARI;EAGLE;TADA	0.00517313	Moderate	7.5	Discordant	1	1
ENSMUSG00000031376	Atp2b3	0.00418387	0.00432524	-0.106479	0.0168225	0.127	0.209	1	0
ENSMUSG00000022749	Tbc1d23	0.00420606	0.00375156	-0.0861785	0.00205881	0.242	0.35	1	0	SFARI						1
ENSMUSG00000034083	Ccdc174	0.00425828	0.00366773	-0.0974525	0.00491634	0.0935	0.166	1	0
ENSMUSG00000045975	C2cd2	0.00426093	0.00336403	-0.132488	0.0147138	0.103	0.174	1	0
ENSMUSG00000074782	4833422C13Rik	0.00426359	0.00479165	-0.119148	0.0189799	0.131	0.214	1	0
ENSMUSG00000030061	Uba3	0.00426571	0.00458769	-0.0842326	0.0147138	0.0975	0.174	1	0
ENSMUSG00000031604	Msmo1	0.00434099	0.00358449	0.10575	0.00709254	0.123	0.061	1	0
ENSMUSG00000050808	Muc15	0.00434499	0.00562569	-0.124776	0.0242325	0.1095	0.19	1	0
ENSMUSG00000024068	Spast	0.00435133	0.00465189	-0.1082	0.0171045	0.1055	0.182	1	0	SFARI;EAGLE		Moderate	8.1	Discordant	1	0
ENSMUSG00000092368	A930015D03Rik	0.0043825	0.00310974	-0.110746	0.0284519	0.2565	0.353	1	0
ENSMUSG00000040729	Cep126	0.00442537	0.00345377	-0.161206	0.0320136	0.4345	0.524	1	0
ENSMUSG00000037196	Pacrg	0.00443878	0.00486801	-0.147703	0.0238919	0.118	0.195	1	0
ENSMUSG00000003380	Rabac1	0.00453984	0.000338274	0.151511	0.0100706	0.275	0.193	1	0
ENSMUSG00000033282	Rpgrip1l	0.00454169	0.00338536	-0.11067	0.00464757	0.1495	0.233	1	0
ENSMUSG00000117317	Gm49961	0.00455586	0.00299019	-0.125867	0.0216139	0.1955	0.289	1	0
ENSMUSG00000051527	Usp29	0.00456001	0.00641637	-0.223623	0.0730068	0.4385	0.564	0.78503	0.304014
ENSMUSG00000023034	Nr4a1	0.00464391	0.00504481	0.230308	0.0158471	0.2045	0.131	1	0
ENSMUSG00000055737	Ghr	0.00466839	0.00291354	-0.137647	0.0126503	0.345	0.455	1	0
ENSMUSG00000068015	Lrch1	0.00467695	0.00153588	-0.136009	0.00636926	0.2365	0.329	1	0
ENSMUSG00000005533	Igf1r	0.00471235	0.00264892	-0.13023	0.00173641	0.3995	0.505	1	0
ENSMUSG00000035305	Ror1	0.00472178	0.00583121	-0.222859	0.0269805	0.398	0.503	1	0
ENSMUSG00000056153	Socs6	0.00472757	0.00440319	-0.0845035	0.0064771	0.202	0.302	1	0
ENSMUSG00000040565	Btaf1	0.00473545	0.00254426	-0.146144	0.00306348	0.4945	0.612	1	0	SFARI					2	0
ENSMUSG00000040325	Dcaf1	0.00476993	0.000294414	-0.127461	0	0.275	0.372	1	0
ENSMUSG00000042390	Gatad2b	0.00479407	0.00409537	-0.136484	0.0208006	0.3395	0.444	1	0
ENSMUSG00000070695	Cntnap5a	0.00481249	0.00141955	-0.17277	0.0119783	0.773	0.81	1	0
ENSMUSG00000021712	Trim23	0.00482271	0.00492005	-0.114211	0.00466884	0.144	0.227	1	0	SFARI					1	0
ENSMUSG00000019852	Arfgef3	0.00485644	0.00617372	-0.142845	0.0395174	0.377	0.492	1	0
ENSMUSG00000021124	Vti1b	0.00489187	0.00341802	-0.12602	0.00613927	0.2605	0.358	1	0
ENSMUSG00000030304	Ergic2	0.00489331	0.00513427	-0.124239	0.0158515	0.174	0.265	1	0
ENSMUSG00000028975	Pex14	0.00490084	0.00443312	-0.0952708	0.0212291	0.1365	0.219	1	0
ENSMUSG00000027200	Sema6d	0.00491782	0.000967518	-0.230797	0.00683284	0.572	0.644	1	0
ENSMUSG00000025576	Rbfox3	0.00494635	0.00301147	0.174979	0.00308666	0.8625	0.88	1	0
ENSMUSG00000050711	Scg2	0.00500986	0.00411679	0.204592	0	0.294	0.217	1	0
ENSMUSG00000039671	Zmynd8	0.00501986	0.00582658	-0.16441	0.046297	0.385	0.484	1	0	SFARI;EAGLE;TADA	0.0977357	Limited	4.5	Discordant	1	0
ENSMUSG00000045098	Kmt5b	0.00502625	0.00624774	-0.138334	0.0280691	0.221	0.313	1	0	SFARI;EAGLE;TADA	0	Definitive	14.05	Concordant	1	0
ENSMUSG00000032238	Rora	0.00503424	0.00520811	-0.159301	0.0138797	0.979	0.987	1	0	SFARI						1
ENSMUSG00000030126	Tmcc1	0.0051447	0.00376682	-0.146761	0.0175186	0.6845	0.77	1	0
ENSMUSG00000039156	Stim2	0.00516892	0.00214712	-0.112795	0.0124409	0.258	0.356	1	0
ENSMUSG00000019986	Ahi1	0.00518279	0.0050561	-0.157099	0.0329825	0.8265	0.901	1	0	SFARI						1
ENSMUSG00000019813	Cep57l1	0.00519843	0.00392976	-0.0747014	0.0141361	0.124	0.206	1	0
ENSMUSG00000006673	Qrich1	0.00521679	0.00713722	-0.120811	0.0426601	0.378	0.516	1	0	SFARI;TADA	0.00071082				2	0
ENSMUSG00000031626	Sorbs2	0.00524027	0.00730407	-0.180195	0.0473345	0.9075	0.971	1	0
ENSMUSG00000022024	Sugt1	0.00525556	0.00453505	-0.0961685	0.00740129	0.1015	0.174	1	0
ENSMUSG00000031556	Tm2d2	0.00525802	0.00282104	0.106289	0.0023002	0.162	0.094	1	0
ENSMUSG00000019970	Sgk1	0.00528007	0.00338566	-0.198287	0.0146609	0.639	0.709	1	0
ENSMUSG00000056427	Slit3	0.00529663	0.00681719	-0.137698	0.0370266	0.8915	0.941	1	0
ENSMUSG00000036282	Naa30	0.00532384	0.0059161	-0.104965	0.0122174	0.107	0.182	1	0
ENSMUSG00000032047	Acat1	0.00532697	9.0648e-06	-0.117458	0.00640927	0.226	0.318	1	0
ENSMUSG00000025499	Hras	0.00540105	0.00360926	0.130308	0.00636926	0.2325	0.152	1	0	SFARI					1	0
ENSMUSG00000043391	2510009E07Rik	0.00545109	0.00300787	-0.14038	0.016034	0.285	0.382	1	0
ENSMUSG00000037857	Nufip2	0.00545616	0.00630154	-0.126079	0.0169322	0.237	0.334	1	0
ENSMUSG00000028572	Hook1	0.00547244	0.00504843	-0.152613	0.0248827	0.4145	0.503	1	0
ENSMUSG00000045967	Gpr158	0.00547398	0.00133517	-0.138775	0.00455533	0.9495	0.981	1	0
ENSMUSG00000028519	Dab1	0.005502	0.0072046	-0.13879	0.0268879	0.9695	0.976	1	0
ENSMUSG00000055531	Cpsf6	0.00551025	0.00491128	-0.11504	0.0281922	0.385	0.5	1	0
ENSMUSG00000025968	Ndufs1	0.00553117	0.00479408	-0.11741	0.00625215	0.2685	0.369	1	0
ENSMUSG00000028886	Eya3	0.00554359	0.00443468	-0.121631	0.0110765	0.202	0.291	1	0
ENSMUSG00000117284	Gm7072	0.00558697	0.00317384	-0.0794356	0.00256639	0.0615	0.12	1	0
ENSMUSG00000040913	Fbxw4	0.00559512	0.000147981	-0.120297	0.00403218	0.282	0.38	1	0
ENSMUSG00000039000	Ube3c	0.00560477	0.000628858	-0.152498	0	0.4075	0.508	1	0	SFARI					2	0
ENSMUSG00000031715	Smarca5	0.00564375	0.00176727	-0.117449	0.00402422	0.286	0.38	1	0
ENSMUSG00000027282	Mtch2	0.00564934	0.00355948	-0.106713	0.0110286	0.199	0.289	1	0
ENSMUSG00000032688	Malt1	0.00565602	0.00467516	-0.0761486	0.0100507	0.068	0.131	1	0
ENSMUSG00000026349	Ccnt2	0.00565956	0.00672261	-0.113493	0.0420924	0.342	0.457	1	0
ENSMUSG00000024530	Prelid3a	0.00566892	0.00322053	-0.130134	0.0108181	0.223	0.313	1	0
ENSMUSG00000004637	Wwox	0.00568059	0.00399487	-0.144092	0.00540234	0.332	0.433	1	0	SFARI					2	0
ENSMUSG00000062110	Scfd2	0.00572131	0.00513282	-0.121065	0.0170027	0.2365	0.329	1	0	SFARI					2	0
ENSMUSG00000035597	Prpf39	0.00573417	0.0041632	-0.116514	0	0.3345	0.439	1	0	SFARI					2	0
ENSMUSG00000028261	Ndufaf4	0.00574171	0.00363769	-0.129368	0.00407242	0.27	0.366	1	0
ENSMUSG00000024921	Smarca2	0.00575218	0.00372191	-0.154611	0.018056	0.293	0.38	1	0	SFARI					1	1
ENSMUSG00000044221	Grsf1	0.00577021	0.0019796	-0.084241	0.00751026	0.0845	0.15	1	0
ENSMUSG00000028426	Rad23b	0.00587761	0.00695105	-0.112707	0.0204262	0.182	0.273	1	0
ENSMUSG00000035964	Tmem59l	0.00602041	0.00624699	0.130181	0.0171817	0.2235	0.144	1	0
ENSMUSG00000022601	Zbtb11	0.0060497	0.00573832	-0.13809	0.0200821	0.283	0.377	1	0
ENSMUSG00000003119	Cdk12	0.00605346	0.00248588	-0.155543	0.00959687	0.3265	0.417	1	0
ENSMUSG00000030527	Crtc3	0.00609641	0.00759557	-0.110636	0.0169825	0.1175	0.195	1	0
ENSMUSG00000030120	Mlf2	0.00609903	0.00495486	0.144364	0.0121447	0.2845	0.203	1	0
ENSMUSG00000055067	Smyd3	0.00612623	0.00552203	-0.210225	0.0151531	0.814	0.853	1	0
ENSMUSG00000016427	Ndufa1	0.00621776	0.00145799	0.139659	0.00875662	0.187	0.118	1	0
ENSMUSG00000044573	Acp1	0.00626839	0.00666668	-0.104667	0.0170501	0.302	0.412	1	0
ENSMUSG00000052374	Actn2	0.00631248	0.0054757	-0.140856	0.00932858	0.61	0.698	1	0
ENSMUSG00000019861	Gopc	0.00632704	0.00293885	-0.0880792	0	0.091	0.158	1	0
ENSMUSG00000045201	Lrrc3b	0.00632848	0.000894489	-0.134543	0.00219149	0.202	0.283	1	0
ENSMUSG00000043079	Synpo	0.00634123	2.96383e-05	-0.0908874	0.00457462	0.163	0.246	1	0
ENSMUSG00000022771	Ppil2	0.00639763	0.00217164	-0.121565	0.00448414	0.1765	0.259	1	0
ENSMUSG00000008683	Rps15a	0.00640333	0.000257931	0.0915729	0.00464757	0.152	0.088	1	0
ENSMUSG00000055720	Ubl7	0.0064231	0.00731439	-0.0786922	0.0127043	0.0655	0.128	1	0
ENSMUSG00000023175	Bsg	0.00643915	0.00873039	0.175377	0.0255294	0.301	0.214	1	0
ENSMUSG00000024487	Yipf5	0.00655454	0.00686884	-0.120812	0.0202907	0.179	0.265	1	0
ENSMUSG00000031290	Lrch2	0.00657075	0.00570649	-0.116918	0.0245829	0.277	0.374	1	0
ENSMUSG00000028577	Plaa	0.00659077	0.00193826	-0.0968483	0.00745538	0.095	0.16	1	0
ENSMUSG00000002190	Clgn	0.00659778	0.00626129	-0.093127	0.0100755	0.0775	0.142	1	0
ENSMUSG00000034118	Tpst1	0.00661154	0.00729741	-0.152982	0.0230195	0.2645	0.353	1	0
ENSMUSG00000029705	Cux1	0.00671086	0.00050146	-0.137845	0.00524494	0.397	0.492	1	0	SFARI					2	0
ENSMUSG00000036097	Slf2	0.00671302	0.00187223	-0.115095	0.0035299	0.3955	0.492	1	0
ENSMUSG00000055567	Unc80	0.00681153	0.00481354	-0.131965	0.0209663	0.7245	0.799	1	0	SFARI					2	0
ENSMUSG00000045671	Spred2	0.00682835	0.0070631	-0.16557	0.0198413	0.4415	0.54	1	0
ENSMUSG00000004364	Cul3	0.00685605	0.00681039	-0.126889	0.0183814	0.369	0.476	1	0	SFARI;EAGLE;TADA	0.00814579	Definitive	18.4	Concordant	1	0
ENSMUSG00000022790	Igsf11	0.0069292	0.00617166	-0.159144	0.0227212	0.5095	0.586	1	0
ENSMUSG00000021519	Mterf3	0.00693477	0.0057044	-0.0894886	0.00966964	0.123	0.198	1	0
ENSMUSG00000028086	Fbxw7	0.00699889	0.0028417	-0.137717	0.00329609	0.447	0.537	1	0
ENSMUSG00000000826	Dnajc5	0.00702916	0.00869783	-0.127868	0.0428693	0.2325	0.324	1	0
ENSMUSG00000038369	Ncoa6	0.00703662	0.00373492	-0.0978494	0.0261847	0.2715	0.372	1	0
ENSMUSG00000022708	Zbtb20	0.00704291	0.00770297	0.283612	0.0429259	0.832	0.807	1	0	SFARI					1	1
ENSMUSG00000031765	Mt1	0.00704662	0.00514025	0.129668	0.00666035	0.1895	0.12	1	0
ENSMUSG00000055239	Kcmf1	0.00705233	0.00518022	-0.080171	0.0159936	0.159	0.243	1	0
ENSMUSG00000054808	Actn4	0.00705738	0.00421751	-0.0986984	0.00902784	0.175	0.259	1	0	SFARI					2	0
ENSMUSG00000020634	Ubxn2a	0.00706021	0.00901251	-0.0818936	0.0155354	0.053	0.112	1	0
ENSMUSG00000022707	Gbe1	0.00709311	0.00974402	-0.113029	0.0476681	0.1485	0.241	1	0	SFARI					2	0
ENSMUSG00000031997	Trpc6	0.0071073	0.00940151	-0.104831	0.0240044	0.114	0.193	1	0	SFARI;EAGLE		Moderate	7.2	Concordant	2	0
ENSMUSG00000031028	Tub	0.00712885	0.00519384	-0.091925	0.0113729	0.171	0.257	1	0
ENSMUSG00000036199	Ndufa13	0.00713575	0.00481471	0.110021	0.00881335	0.2005	0.128	1	0
ENSMUSG00000022300	Dcaf13	0.00718241	0.00600716	-0.101973	0.0111492	0.186	0.273	1	0
ENSMUSG00000020646	Mboat2	0.00719384	0.00695253	-0.103142	0.0167928	0.2315	0.332	1	0
ENSMUSG00000024969	Mark2	0.00725723	0.00147101	-0.111626	0.00133439	0.615	0.709	1	0	SFARI;TADA	1.2e-05				2	0
ENSMUSG00000021051	Ppp2r5e	0.00727327	0.00370834	-0.132269	0.00369616	0.3675	0.463	1	0
ENSMUSG00000059208	Hnrnpm	0.00727631	0.00501729	-0.14223	0.0046975	0.492	0.586	1	0
ENSMUSG00000117521	Gm50024	0.0072767	0.00735015	-0.101629	0.0104846	0.2355	0.332	1	0
ENSMUSG00000079564	Gm11149	0.00728693	0.0048763	-0.108146	0.00962403	0.122	0.193	1	0
ENSMUSG00000020704	Asic2	0.00731424	0.00771264	-0.175392	0.0340939	0.615	0.698	1	0
ENSMUSG00000039901	Armh3	0.00731566	0.00456599	-0.152043	0.0151135	0.3505	0.444	1	0
ENSMUSG00000021474	Sfxn1	0.00732622	0.00488165	-0.136977	0.012968	0.2195	0.305	1	0
ENSMUSG00000029267	Mtf2	0.00734148	0.00921781	-0.128611	0.0406754	0.46	0.564	1	0
ENSMUSG00000039372	Marchf4	0.00738108	0.00940753	-0.119625	0.0286805	0.258	0.361	1	0
ENSMUSG00000025915	Sgk3	0.00738601	0.00487686	-0.148166	0.0108961	0.5735	0.676	1	0
ENSMUSG00000030172	Erc1	0.00740421	0.00819049	-0.170035	0.0251456	0.381	0.481	1	0
ENSMUSG00000020954	Strn3	0.00741702	0.00911908	-0.166963	0.0357145	0.695	0.778	1	0
ENSMUSG00000033216	Eefsec	0.00750643	0.00303236	-0.124331	0.00408056	0.29	0.382	1	0
ENSMUSG00000047215	Rpl9	0.0075669	0.00786962	0.125604	0.0193908	0.218	0.142	1	0
ENSMUSG00000026596	Abl2	0.007595	0.00973121	-0.11464	0.0323341	0.416	0.537	1	0	SFARI					3	0
ENSMUSG00000039795	Zfand1	0.00769869	0.00805906	-0.0833014	0.012897	0.056	0.112	1	0
ENSMUSG00000051351	Zfp46	0.0077379	0.00580993	-0.0963629	0.0145737	0.111	0.182	1	0
ENSMUSG00000024953	Prdx5	0.00776801	0.00930486	0.116542	0.0139747	0.1415	0.078	1	0
ENSMUSG00000070056	Mfhas1	0.00776958	0.00031608	-0.0922525	0.00734797	0.102	0.168	1	0
ENSMUSG00000003184	Irf3	0.00778982	0.000147205	0.105	0.00234785	0.136	0.078	1	0
ENSMUSG00000039967	Zfp292	0.00787178	0.00317851	-0.13592	0.00707205	0.4115	0.508	1	0	SFARI					1	1
ENSMUSG00000024109	Nrxn1	0.00793497	0.0105821	-0.150678	0.0313914	0.989	1	1	0	SFARI;EAGLE		Definitive	143.75	Concordant	1	0
ENSMUSG00000029775	Klhdc10	0.0079351	0.00233312	-0.106317	0.0019751	0.29	0.388	1	0
ENSMUSG00000003604	Aven	0.00795494	0.00431178	-0.0994478	0.0119316	0.123	0.195	1	0
ENSMUSG00000025280	Polr3a	0.00799779	0.00772234	-0.0882912	0.0143013	0.1295	0.206	1	0	SFARI					3	1
ENSMUSG00000027763	Mbnl1	0.00802344	0.0042543	-0.130363	0.0177641	0.6765	0.733	1	0
ENSMUSG00000063873	Slc24a3	0.00803709	0.0106527	-0.187102	0.0323197	0.2285	0.316	1	0
ENSMUSG00000029550	Sppl3	0.0080527	0.00637004	-0.112253	0.00423295	0.234	0.321	1	0
ENSMUSG00000059602	Syn3	0.00807144	0.00839691	-0.158041	0.0237891	0.397	0.484	1	0
ENSMUSG00000020163	Uqcr11	0.00814597	0.00105908	0.106664	0.00454406	0.167	0.102	1	0
ENSMUSG00000031708	Tecr	0.00816218	0.00489905	0.172676	0.00519156	0.4035	0.324	1	0
ENSMUSG00000040282	Cdin1	0.00816521	0.00304477	-0.0988091	0.0078172	0.2875	0.388	1	0
ENSMUSG00000026223	Itm2c	0.00820749	0.00900945	0.197692	0.0377873	0.5385	0.473	1	0
ENSMUSG00000039050	Osbpl2	0.00825613	0.0103235	-0.104077	0.0295713	0.172	0.259	1	0
ENSMUSG00000069808	Tlcd3a	0.00832959	0.00853096	-0.0772836	0.0153024	0.0645	0.123	1	0
ENSMUSG00000020048	Hsp90b1	0.00833653	0.0107059	0.151576	0.0268979	0.332	0.243	1	0
ENSMUSG00000034620	Rxylt1	0.00839744	0.00530369	-0.069273	0.00771862	0.0535	0.107	1	0
ENSMUSG00000059182	Skap2	0.00840504	0.00386876	-0.102579	0.0071589	0.1335	0.206	1	0
ENSMUSG00000090053	Pakap	0.00844384	0.011554	-0.122645	0.0305243	0.131	0.214	1	0
ENSMUSG00000062929	Cfl2	0.0084468	0.00860397	-0.0895062	0.0160295	0.16	0.243	1	0
ENSMUSG00000036613	Eipr1	0.00847346	0.00770169	-0.119747	0.0111736	0.19	0.273	1	0
ENSMUSG00000071064	Zfp827	0.00848206	0.0114515	-0.117853	0.0422478	0.2445	0.348	1	0	SFARI					2	0
ENSMUSG00000021838	Samd4	0.00852212	0.00696849	-0.123134	0.0161017	0.1605	0.238	1	0
ENSMUSG00000079037	Prnp	0.00852563	0.0110351	0.116424	0.0245291	0.199	0.123	1	0
ENSMUSG00000048758	Rpl29	0.0085357	0.0105328	0.106591	0.0220341	0.222	0.142	1	0
ENSMUSG00000097267	1700109K24Rik	0.00854106	0.0069611	-0.100328	0.0116589	0.1415	0.219	1	0
ENSMUSG00000045903	Npas4	0.00859125	0.00567538	0.186262	0.0167583	0.171	0.107	1	0
ENSMUSG00000032939	Nup93	0.00864702	0.00897855	-0.121099	0.0204444	0.5895	0.698	1	0
ENSMUSG00000052726	Kcnt2	0.00868335	0.00483092	-0.14861	0.017023	0.0775	0.136	1	0
ENSMUSG00000026504	Sdccag8	0.00880834	0.00172261	-0.110411	0.00182331	0.3955	0.495	1	0
ENSMUSG00000024474	Ik	0.00886685	0.00687615	-0.0832732	0.0101005	0.076	0.136	1	0
ENSMUSG00000056014	A430033K04Rik	0.00894295	0.000277777	-0.0671187	0.00511349	0.056	0.11	1	0
ENSMUSG00000061298	Agbl4	0.00898101	0.0108348	-0.171679	0.0557423	0.441	0.543	1	0	SFARI					2	0
ENSMUSG00000027933	Ints3	0.00898543	0.0015291	0.107843	0.0086453	0.233	0.158	1	0
ENSMUSG00000044176	Spink10	0.00900233	0.00796615	-0.0909727	0.0147493	0.099	0.166	1	0
ENSMUSG00000046516	Cox17	0.00900628	0.00759218	0.0846446	0.0145391	0.107	0.053	1	0
ENSMUSG00000060206	Zfp462	0.0090345	0.0013679	-0.154741	0.00149034	0.5255	0.626	1	0	SFARI;EAGLE		Moderate	10.6	Discordant	1	1
ENSMUSG00000016541	Atxn10	0.00907155	0.00240897	-0.120591	0.00209259	0.2515	0.34	1	0
ENSMUSG00000109901	Chmp1b	0.00907817	0.00774493	-0.0802304	0.00777747	0.052	0.104	1	0
ENSMUSG00000024240	Epc1	0.00908883	0.00754149	-0.130066	0.00549942	0.3675	0.447	1	0
ENSMUSG00000040943	Tet2	0.00911903	0.00333619	-0.091215	0.0078322	0.294	0.396	1	0	SFARI					2	0
ENSMUSG00000005580	Adcy9	0.00915078	0.0122073	-0.137175	0.0466274	0.5685	0.684	1	0
ENSMUSG00000039842	Mcph1	0.00915164	0.00966703	-0.0984878	0.00900791	0.1765	0.262	1	0	SFARI					2	0
ENSMUSG00000022816	Fstl1	0.00915222	0.00191684	-0.0894076	0.00246113	0.0895	0.152	1	0
ENSMUSG00000040430	Pitpnc1	0.00916129	0.0108196	-0.142946	0.0436088	0.4905	0.602	1	0
ENSMUSG00000025658	Cnksr2	0.00916874	0.0047132	-0.134987	0.00873786	0.9815	0.992	1	0	SFARI					2	1
ENSMUSG00000033306	Lpp	0.00917535	0.000669029	-0.0832487	0.00741923	0.083	0.144	1	0
ENSMUSG00000022195	6030458C11Rik	0.00917841	0.00252049	-0.0937555	0.0072095	0.123	0.193	1	0
ENSMUSG00000053641	Dennd4a	0.00921257	0.00553339	-0.130631	0.00333379	0.4665	0.561	1	0
ENSMUSG00000026771	Spopl	0.00921377	0.005149	-0.100351	0	0.2115	0.299	1	0
ENSMUSG00000019726	Lyst	0.0092224	0.000493494	-0.10527	0.0101255	0.643	0.746	1	0
ENSMUSG00000031584	Gsr	0.0092485	0.00861753	-0.0950565	0.00731286	0.1085	0.176	1	0
ENSMUSG00000061665	Cd2ap	0.00924938	0.00162879	-0.0934378	0.00368948	0.3585	0.463	1	0
ENSMUSG00000063694	Cycs	0.00931597	0.00759176	0.0825373	0.0120728	0.1205	0.064	1	0
ENSMUSG00000053465	Hs6st3	0.00933772	0.00401184	-0.125634	0.00597478	0.961	0.973	1	0
ENSMUSG00000025571	Tnrc6c	0.00938007	0.0111269	-0.148163	0.026832	0.725	0.775	1	0	SFARI					2	0
ENSMUSG00000024897	Apba1	0.00939253	0.0131529	-0.134812	0.0542996	0.167	0.262	1	0
ENSMUSG00000021840	Mapk1ip1l	0.00942944	0.00594028	-0.0803606	0.00486941	0.106	0.174	1	0
ENSMUSG00000020886	Dlg4	0.00943104	0.00291378	0.158385	0.00172467	0.4415	0.369	1	0	SFARI;EAGLE;TADA	0.0100835	Limited	2.45	Discordant	1	0
ENSMUSG00000016252	Atp5e	0.00943267	0.00741794	0.0995268	0.0071589	0.123	0.067	1	0
ENSMUSG00000073702	Rpl31	0.00944986	0.000457724	0.13348	0.0101306	0.2845	0.209	1	0
ENSMUSG00000026492	Tfb2m	0.00951624	0.0125881	-0.113388	0.0252523	0.0775	0.142	1	0	SFARI					3	0
ENSMUSG00000002280	Ciao3	0.00956733	0.00309164	-0.070566	0.00511349	0.0625	0.118	1	0
ENSMUSG00000026527	Rgs7	0.00968108	0.00343117	-0.160269	0.00943706	0.829	0.872	1	0	SFARI					2	0
ENSMUSG00000055214	Pld5	0.00981599	0.00623795	-0.154584	0.00166011	0.3995	0.497	1	0
ENSMUSG00000033083	Tbc1d4	0.00982856	0.0103366	-0.118031	0.0179853	0.2595	0.353	1	0
ENSMUSG00000026028	Trak2	0.00983459	0.0104795	-0.101514	0.0121882	0.112	0.182	1	0
ENSMUSG00000097736	9530059O14Rik	0.00987042	0.00237392	-0.172818	0.0142458	0.8275	0.888	1	0
ENSMUSG00000024083	Pja2	0.00989015	0.000604681	-0.123107	0.00826028	0.6045	0.684	1	0
ENSMUSG00000024346	Pfdn1	0.00989728	0.00928244	-0.114371	0.0115271	0.171	0.249	1	0
ENSMUSG00000031558	Slit2	0.00994056	0.00564065	-0.192661	0.00971569	0.0725	0.128	1	0
ENSMUSG00000079038	D130040H23Rik	0.0099431	0.000827563	-0.126339	0.0045542	0.183	0.257	1	0
ENSMUSG00000026924	Sec16a	0.00995254	0.00659853	-0.099096	0.00966964	0.116	0.184	1	0
ENSMUSG00000000001	Gnai3	0.0100931	0.0103807	-0.0975552	0.0125172	0.0895	0.152	1	0
ENSMUSG00000039515	Ptpa	0.0101694	0.00410726	-0.101666	0.0045139	0.1815	0.262	1	0
ENSMUSG00000072235	Tuba1a	0.0101886	0.0133474	0.134492	0.0187953	0.2475	0.163	1	0
ENSMUSG00000022770	Dlg1	0.0101953	0.0127353	-0.136177	0.0242181	0.761	0.848	1	0	SFARI					2	0
ENSMUSG00000063239	Grm4	0.0102337	0.00429077	0.12918	0.00981855	0.314	0.233	1	0
ENSMUSG00000030647	Ndufc2	0.0102485	0.00928311	0.132823	0.0238007	0.2075	0.136	1	0
ENSMUSG00000085334	Gm12940	0.010261	0.00743548	-0.0969041	0.0112475	0.179	0.262	1	0
ENSMUSG00000055917	Zfp277	0.0103292	0.00902064	-0.0909699	0.00885159	0.1775	0.259	1	0
ENSMUSG00000024283	Wac	0.010382	0.00552357	-0.131596	0.0165075	0.452	0.553	1	0	SFARI;EAGLE;TADA	3.92e-06	Definitive	15	Concordant	1	1
ENSMUSG00000002997	Prkar2b	0.0103858	0.0102611	-0.107141	0.0192485	0.481	0.596	1	0
ENSMUSG00000003813	Rad23a	0.0104073	0.00844066	-0.0747355	0.00516527	0.055	0.107	1	0
ENSMUSG00000005583	Mef2c	0.0104205	0.00560079	-0.174992	0.0116923	0.5135	0.591	1	0	SFARI;EAGLE		Moderate	9.85	Discordant	1	1
ENSMUSG00000025384	Faap100	0.0104436	0.00694011	0.0691265	0.0171456	0.106	0.053	1	0
ENSMUSG00000024498	Tcerg1	0.0104794	0.0103909	-0.122693	0.020568	0.262	0.353	1	0
ENSMUSG00000037541	Shank2	0.0104879	0.00878319	-0.109489	0.0135633	0.3195	0.412	1	0	SFARI;EAGLE;TADA	0.00016496	Definitive	18.55	Concordant	1	0
ENSMUSG00000028820	Sfpq	0.0105138	0.00678664	-0.14078	0.00255035	0.678	0.749	1	0
ENSMUSG00000027167	Elp4	0.0105155	0.00939201	-0.13458	0.0181273	0.2765	0.366	1	0	SFARI					2	0
ENSMUSG00000079036	Alkbh1	0.0105333	0.00211019	-0.0899968	0	0.1375	0.209	1	0
ENSMUSG00000025468	Caly	0.0105577	0.000767902	0.170545	0.00710901	0.3675	0.294	1	0
ENSMUSG00000048410	Zfp407	0.0106275	0.0102749	-0.106062	0.0299433	0.529	0.628	1	0
ENSMUSG00000097545	Mir124a-1hg	0.0106989	0.0127282	0.191191	0.0184229	0.7155	0.658	1	0
ENSMUSG00000024038	Ndufv3	0.0107267	0.00282989	0.07534	0.00724362	0.111	0.059	1	0
ENSMUSG00000001855	Nup214	0.0107612	0.00801354	-0.0780346	0.0136021	0.1655	0.246	1	0
ENSMUSG00000062319	Gm10115	0.0107734	0.0108918	-0.129603	0.0141268	0.2965	0.388	1	0
ENSMUSG00000054843	Atrnl1	0.0107788	0.00699497	-0.10761	0.0131633	0.6965	0.816	1	0
ENSMUSG00000023845	Lnpep	0.0108158	0.0121376	-0.141206	0.0176397	0.3035	0.393	1	0
ENSMUSG00000021910	Nisch	0.0108417	0.0142879	0.187205	0.0427906	0.5975	0.532	1	0
ENSMUSG00000038070	Cntln	0.0108632	0.00906455	-0.12612	0.0260305	0.2725	0.361	1	0
ENSMUSG00000027223	Mapk8ip1	0.0110051	0.00361979	-0.0880348	0	0.171	0.249	1	0	SFARI					3	0
ENSMUSG00000037605	Adgrl3	0.0110052	0.0141356	-0.0993244	0.0291669	0.9985	0.995	1	0
ENSMUSG00000031697	Orc6	0.011015	0.0143833	-0.0836157	0.0322307	0.083	0.15	1	0
ENSMUSG00000049422	Chchd10	0.0110247	0.0127671	0.150943	0.0332082	0.344	0.257	1	0
ENSMUSG00000074024	4632427E13Rik	0.0110442	0.00348803	-0.146122	0.00395403	0.3155	0.39	1	0
ENSMUSG00000063273	Naa15	0.011099	0.00728442	-0.075852	0.0212336	0.298	0.393	1	0	SFARI;EAGLE;TADA	0.00019471	Definitive	31.7	Concordant	1	1
ENSMUSG00000046201	Scaf8	0.0111094	0.00385258	-0.130428	0.00332835	0.439	0.529	1	0
ENSMUSG00000021670	Hmgcr	0.0111986	0.0114001	0.119104	0.0231143	0.25	0.171	1	0
ENSMUSG00000031633	Slc25a4	0.0112278	0.0041265	0.128922	0.00405623	0.282	0.206	1	0
ENSMUSG00000095253	Zfp799	0.0114087	0.000313649	-0.0732346	0.0021682	0.2075	0.291	1	0
ENSMUSG00000061032	Rrp1	0.0114931	0.00266175	0.112094	0.00221049	0.198	0.131	1	0
ENSMUSG00000030086	Chchd6	0.0115165	0.00405687	-0.0784363	0.00232643	0.147	0.222	1	0
ENSMUSG00000019659	Ccdc12	0.0115599	0.0119607	-0.0770116	0.0124257	0.0845	0.147	1	0
ENSMUSG00000031841	Cdh13	0.0115754	0.00322354	-0.22126	0.00374364	0.583	0.658	1	0	SFARI					2	0
ENSMUSG00000078427	Sarnp	0.0116805	0.000950989	-0.115725	0.00448414	0.183	0.259	1	0
ENSMUSG00000026499	Acbd3	0.011758	0.00643433	-0.0772475	0.00510071	0.064	0.118	1	0
ENSMUSG00000023089	Ndufa5	0.0118645	0.00237469	0.108081	0.00866366	0.2235	0.152	1	0	SFARI					2	0
ENSMUSG00000027652	Ralgapb	0.0118664	0.00442464	-0.118201	0.0106636	0.397	0.492	1	0	SFARI					1	0
ENSMUSG00000021313	Ryr2	0.0118679	0.00649169	-0.128805	0.0278843	0.636	0.711	1	0
ENSMUSG00000024622	Hmgxb3	0.0119131	0.00459611	-0.0909747	0.00241453	0.123	0.19	1	0
ENSMUSG00000057098	Ebf1	0.0119347	0.00849219	-0.143193	0.0342115	0.582	0.666	1	0
ENSMUSG00000024853	Sf3b2	0.0119942	0.00525421	-0.0974998	0.00432263	0.229	0.316	1	0
ENSMUSG00000027012	Dync1i2	0.0120248	0.0152167	-0.137944	0.0338615	0.659	0.743	1	0
ENSMUSG00000026926	Pmpca	0.0120714	0.00266871	0.072281	0.0024318	0.1135	0.061	1	0
ENSMUSG00000022489	Pde1b	0.0121183	0.0127532	0.170084	0.0127254	0.767	0.727	1	0
ENSMUSG00000025279	Dnase1l3	0.0121862	0.00924321	0.263585	0.0332208	0.2795	0.211	1	0
ENSMUSG00000033075	Senp1	0.0122014	0.0156718	-0.0837574	0.0292184	0.107	0.179	1	0	SFARI					3	0
ENSMUSG00000052155	Acvr2a	0.0122222	0.0170431	-0.165729	0.046466	0.305	0.404	1	0
ENSMUSG00000021796	Bmpr1a	0.0122551	0.00989245	-0.111353	0.0114196	0.3225	0.42	1	0
ENSMUSG00000000127	Fer	0.0122873	0.00766544	-0.0666173	0.0309157	0.381	0.492	1	0
ENSMUSG00000060301	2610008E11Rik	0.0123169	0.0100657	-0.103882	0.0163975	0.147	0.219	1	0
ENSMUSG00000018433	Nol11	0.0123311	0.0161217	-0.108769	0.0290107	0.111	0.182	1	0
ENSMUSG00000113216	Gm40841	0.0123608	0.000591477	-0.0921657	0.00213642	0.211	0.294	1	0
ENSMUSG00000047747	Rnf150	0.0124115	0.00388251	-0.15008	0.00123578	0.6365	0.733	1	0
ENSMUSG00000025189	Cnnm1	0.0124168	0	-0.0917715	0	0.233	0.316	1	0
ENSMUSG00000030619	Eed	0.0124515	0.00299792	-0.076683	0	0.071	0.126	1	0
ENSMUSG00000042389	Tsen2	0.0124562	0.0119501	-0.0695805	0.0151135	0.075	0.134	1	0
ENSMUSG00000086291	Gm15513	0.0124767	0.012872	-0.0679647	0.0103568	0.0505	0.102	1	0
ENSMUSG00000038187	Btbd10	0.0125273	0.0148297	-0.0777783	0.0194689	0.2875	0.393	1	0
ENSMUSG00000027581	Stmn3	0.0126679	0.0148882	0.148457	0.0239574	0.2725	0.195	1	0
ENSMUSG00000010517	Faf1	0.0127174	0.00466949	-0.140632	0.00728674	0.6685	0.757	1	0
ENSMUSG00000036435	Exoc1	0.012759	0.0124912	-0.0895373	0.0193397	0.119	0.187	1	0
ENSMUSG00000018707	Dync1h1	0.0127735	0.0116362	0.141885	0.00182005	0.3795	0.299	1	0	SFARI;EAGLE;TADA	3.36e-05	Definitive	13.45	Concordant	1	0
ENSMUSG00000024668	Sdhaf2	0.0127739	0.0102737	-0.0967884	0.00976217	0.1095	0.174	1	0
ENSMUSG00000001157	Gmcl1	0.0128505	3.24292e-05	-0.0988742	0.0148387	0.337	0.436	1	0
ENSMUSG00000020696	Rffl	0.012906	0.00577198	-0.087153	0.00249118	0.0885	0.147	1	0
ENSMUSG00000062296	Trank1	0.0129155	0.00604638	-0.115347	0.000797295	0.8835	0.898	1	0
ENSMUSG00000098097	6530403H02Rik	0.0129315	0.0102388	-0.180044	0.013461	0.702	0.757	1	0
ENSMUSG00000057637	Prdm2	0.0130085	0.00416721	-0.0674283	0.0113476	0.159	0.238	1	0
ENSMUSG00000043929	Klhl15	0.0130519	0.0091593	-0.112643	0.0121206	0.275	0.364	1	0
ENSMUSG00000038215	Cep44	0.013124	0.0127802	-0.0946538	0.00988036	0.095	0.158	1	0
ENSMUSG00000031508	Ankrd10	0.0132406	0.0178286	-0.110317	0.0357243	0.2485	0.345	1	0
ENSMUSG00000028882	Ppp1r8	0.0133728	0.00037007	-0.0763708	0.00257937	0.053	0.102	1	0
ENSMUSG00000069727	Zfp975	0.0133857	0.0181227	-0.0815604	0.0226987	0.071	0.134	1	0
ENSMUSG00000036572	Upf3b	0.0133887	0.0151026	-0.10289	0.0273879	0.1695	0.249	1	0	SFARI					1	1
ENSMUSG00000050079	Rspry1	0.0133899	0.0181395	-0.146881	0.0402599	0.2435	0.334	1	0
ENSMUSG00000049606	Zfp644	0.0133908	0.0166385	-0.119879	0.0220818	0.2075	0.291	1	0
ENSMUSG00000028385	Snx30	0.0134882	0.0037099	-0.0682295	0.00494015	0.0895	0.15	1	0
ENSMUSG00000032743	Katnip	0.0135441	0.000558473	-0.10668	0.00233709	0.158	0.227	1	0
ENSMUSG00000079055	Slc8a3	0.0136054	0.000883229	-0.122741	0.0136704	0.406	0.5	1	0
ENSMUSG00000002845	Tmem39a	0.013654	0.00257523	-0.0671153	0.00249118	0.0815	0.139	1	0
ENSMUSG00000027649	Ctnnbl1	0.0136615	0.0100949	-0.0788882	0.0137549	0.1605	0.238	1	0
ENSMUSG00000018800	Abca5	0.0137168	0.00321949	-0.108074	0.00906797	0.1725	0.246	1	0
ENSMUSG00000048720	Tbc1d12	0.0137691	0.0100752	-0.0985854	0.0169674	0.2355	0.318	1	0
ENSMUSG00000087473	Gm13883	0.0137764	0.0149161	-0.0662933	0.0270089	0.095	0.16	1	0
ENSMUSG00000025871	4833439L19Rik	0.0137834	0.0139331	-0.0677966	0.0103306	0.0535	0.104	1	0
ENSMUSG00000061313	Ddhd2	0.0138606	0.0106149	-0.125883	0.0259795	0.279	0.366	1	0	SFARI					2	0
ENSMUSG00000019715	Gle1	0.013896	0.00731665	-0.0894328	0.0123058	0.091	0.15	1	0
ENSMUSG00000030067	Foxp1	0.0139183	0.00223038	-0.124585	0.00357317	0.963	0.984	1	0	SFARI;EAGLE;TADA	0	Definitive	60.45	Concordant	1	1
ENSMUSG00000041164	Zmiz2	0.0139192	0.0161833	-0.102468	0.0187617	0.1495	0.225	1	0
ENSMUSG00000024944	Arl2	0.0139257	0	-0.0677781	0	0.053	0.102	1	0
ENSMUSG00000047675	Rps8	0.0139491	0.00239857	0.0902825	0.00853678	0.2405	0.166	1	0
ENSMUSG00000058690	Ccser2	0.014	0.0104012	-0.105887	0.0103568	0.2685	0.353	1	0
ENSMUSG00000066613	Zfp932	0.0140717	0.00446256	-0.0941631	0.0116589	0.1405	0.209	1	0
ENSMUSG00000046329	Slc25a23	0.0141145	0.0171408	-0.133466	0.033908	0.294	0.382	1	0
ENSMUSG00000033417	Cacul1	0.0142018	0.0154981	-0.102962	0.0221778	0.1965	0.278	1	0
ENSMUSG00000021779	Thrb	0.0142171	0.00452757	0.152838	0.00883243	0.7315	0.663	1	0
ENSMUSG00000031731	Ap1g1	0.0142413	0.00211636	-0.0980348	0.00398492	0.2965	0.388	1	0
ENSMUSG00000022840	Adcy5	0.0142519	0.0180027	0.138488	0.0286784	0.9625	0.963	1	0	SFARI					2	0
ENSMUSG00000035382	Pcsk7	0.0142835	0.0120581	-0.121474	0.0107952	0.222	0.299	1	0
ENSMUSG00000086040	Wipf3	0.0143396	0.0194665	-0.176342	0.0522399	0.405	0.5	1	0
ENSMUSG00000059401	Mamld1	0.0143491	0.0163671	-0.0830207	0.0153738	0.199	0.286	1	0
ENSMUSG00000022378	Cyrib	0.0143808	0.00528126	-0.134059	0.00805377	0.623	0.711	1	0
ENSMUSG00000037509	Arhgef4	0.0143994	0.00803751	-0.0857119	0.0158868	0.1735	0.251	1	0
ENSMUSG00000106515	Gm30382	0.0144261	0.00728626	-0.156359	0	0.1955	0.265	1	0
ENSMUSG00000055932	Fto	0.0145636	0.0134801	-0.12433	0.0294764	0.468	0.564	1	0
ENSMUSG00000021852	Slc35f4	0.0145831	0.00803412	-0.174229	0.0170415	0.3235	0.417	1	0
ENSMUSG00000014763	Fam120b	0.0146223	0.00947728	-0.10776	0.0121688	0.2885	0.372	1	0
ENSMUSG00000085631	9630028H03Rik	0.0146561	0.00502566	-0.0814368	0.0116779	0.3945	0.503	1	0
ENSMUSG00000030075	Cntn3	0.0146572	0.00056336	-0.248032	0.0111249	0.5615	0.612	1	0	SFARI					2	0
ENSMUSG00000096054	Syne1	0.0147326	0.0016921	-0.101303	0.00498847	0.917	0.968	1	0	SFARI					2	1
ENSMUSG00000038658	Ric1	0.0147572	0.0161591	-0.106163	0.0373863	0.2995	0.393	1	0
ENSMUSG00000029467	Atp2a2	0.0147619	0.0137483	0.145403	0.0217467	0.619	0.545	1	0
ENSMUSG00000013495	Tmem175	0.0147685	0.0157497	-0.120611	0.0211655	0.2405	0.321	1	0
ENSMUSG00000006586	Runx1t1	0.0147794	0.00129252	-0.151522	0.00573436	0.6455	0.738	1	0	TADA	0.0352799
ENSMUSG00000024851	Pitpnm1	0.0148138	0.0148029	0.0975973	0.0163975	0.147	0.088	1	0
ENSMUSG00000020375	Rufy1	0.0148931	0.0127423	-0.0887214	0.00995266	0.0885	0.147	1	0
ENSMUSG00000039278	Pcsk1n	0.0149512	0.00532696	0.213902	0.0124662	0.555	0.497	1	0
ENSMUSG00000006678	Pola1	0.014953	0.0130348	-0.141856	0.0102322	0.241	0.318	1	0
ENSMUSG00000063887	Nlgn1	0.0149682	0.00135206	-0.0636332	0.00550413	1	1	1	0	SFARI					2	0
ENSMUSG00000040648	Ppip5k2	0.0151274	0.0106069	-0.120963	0.0148657	0.3475	0.439	1	0
ENSMUSG00000048756	Foxo3	0.0151304	0.0154672	-0.117685	0.0196944	0.313	0.398	1	0
ENSMUSG00000040040	Ift88	0.015319	0.0174603	-0.0988521	0.0206559	0.155	0.23	1	0
ENSMUSG00000003534	Ddr1	0.015351	0.00133026	-0.0687649	0.00766066	0.064	0.115	1	0
ENSMUSG00000031129	Slc9a9	0.0154061	0.00478221	-0.0808976	0.00751026	0.079	0.134	1	0	SFARI					2	0
ENSMUSG00000002059	Rab34	0.0154749	0	-0.0688768	0	0.083	0.139	1	0
ENSMUSG00000033439	Trmt13	0.0154837	0.0115596	-0.0738411	0.0071422	0.1175	0.182	1	0
ENSMUSG00000071341	Egr4	0.0154918	0.00757544	0.09631	0.0215784	0.1045	0.056	1	0
ENSMUSG00000025159	Mms19	0.0155469	0.00542537	-0.0798007	0	0.1175	0.182	1	0
ENSMUSG00000009291	Pttg1ip	0.0156182	0.012324	-0.0752917	0.0045542	0.1615	0.238	1	0
ENSMUSG00000097342	Gm26618	0.015653	0.000426461	-0.0900395	0.00247908	0.091	0.147	1	0
ENSMUSG00000027668	Mfn1	0.0156696	0.0118594	-0.101818	0.00962403	0.123	0.187	1	0
ENSMUSG00000036712	Cyld	0.015717	0.0120965	-0.141329	0.0127592	0.725	0.765	1	0
ENSMUSG00000005501	Usp40	0.0158101	0.0159658	-0.0896126	0.0304542	0.218	0.302	1	0
ENSMUSG00000022956	Atp5o.1	0.0159341	0.00327275	0.1152	0.00894865	0.175	0.115	1	0
ENSMUSG00000036104	Rab3gap1	0.0159456	0.006952	-0.133686	0.00660287	0.467	0.543	1	0
ENSMUSG00000038048	Cntnap5c	0.0160109	0.0137026	-0.128868	0.012498	0.4465	0.529	1	0
ENSMUSG00000026353	Ubxn4	0.016015	0.00858465	-0.132658	0.0107952	0.229	0.299	1	0
ENSMUSG00000026058	Khdrbs2	0.016082	0.0149388	0.208876	0.0356275	0.3385	0.259	1	0	SFARI					2	0
ENSMUSG00000021870	Slmap	0.0161206	0.00581175	-0.145245	0.00662861	0.631	0.69	1	0
ENSMUSG00000023025	Larp4	0.0161302	0.00698713	-0.0820128	0.0229254	0.1615	0.233	1	0
ENSMUSG00000036167	Pphln1	0.016184	0.00295157	-0.0702261	0	0.111	0.174	1	0
ENSMUSG00000057147	Dph6	0.016249	0.0149882	-0.123954	0.0172617	0.386	0.495	1	0
ENSMUSG00000034007	Scaper	0.0162523	0.0162761	-0.129961	0.0119117	0.452	0.532	1	0
ENSMUSG00000042700	Sipa1l1	0.0162547	0.0183635	-0.125816	0.0196897	0.9415	0.96	1	0
ENSMUSG00000020674	Pxdn	0.0163158	0.000773876	-0.103443	0.0194318	0.303	0.39	1	0	SFARI					2	0
ENSMUSG00000005871	Apc	0.0163445	0.0200782	-0.126968	0.0386083	0.5815	0.655	1	0
ENSMUSG00000021846	Peli2	0.0163456	0.0037228	-0.0841944	0.00875662	0.1885	0.265	1	0
ENSMUSG00000029207	Apbb2	0.0163698	0.00997832	-0.131321	0.0118327	0.418	0.508	1	0
ENSMUSG00000067889	Sptbn2	0.0164175	0.00566915	0.15613	0.0111841	0.4775	0.412	1	0
ENSMUSG00000031652	N4bp1	0.0164433	0.0150683	-0.0772206	0.0174387	0.0885	0.147	1	0
ENSMUSG00000032185	Carm1	0.01646	0.00112989	-0.0703934	0.00485782	0.107	0.168	1	0
ENSMUSG00000063296	Tmem117	0.0165102	0.0135634	-0.100164	0.0198092	0.2955	0.38	1	0
ENSMUSG00000087579	Hectd2os	0.0165232	0.0127129	-0.0611782	0.0196187	0.09	0.15	1	0
ENSMUSG00000045519	Zfp560	0.0166418	0.0199489	-0.095798	0.0150023	0.087	0.147	1	0
ENSMUSG00000028483	Snapc3	0.0166615	0.00580625	-0.108908	0.012968	0.218	0.294	1	0
ENSMUSG00000062519	Zfp398	0.0166883	0.0178568	-0.0995031	0.0214774	0.123	0.19	1	0
ENSMUSG00000018334	Ksr1	0.0167075	0.0189915	-0.113841	0.0278871	0.143	0.214	1	0
ENSMUSG00000004789	Dlst	0.0168087	0.0139483	-0.104108	0	0.163	0.233	1	0
ENSMUSG00000098274	Rpl24	0.0168253	0.0139803	0.0957998	0.0115011	0.1615	0.102	1	0
ENSMUSG00000028552	Eps15	0.0168275	0.0175202	-0.0825261	0.0192032	0.115	0.182	1	0
ENSMUSG00000031012	Cask	0.0168284	0.00193338	-0.143535	0.00970029	0.4815	0.572	1	0	SFARI					1	0
ENSMUSG00000026885	Ttll11	0.0168678	0.00580043	-0.0959691	0	0.384	0.476	1	0
ENSMUSG00000038365	Fbxo25	0.0168831	0.0104535	-0.0867925	0.0119316	0.124	0.19	1	0
ENSMUSG00000027823	Gmps	0.0168876	0.00907842	-0.0799605	0.0123655	0.0965	0.155	1	0
ENSMUSG00000032294	Pkm	0.0169964	0.0162939	0.161439	0.0360511	0.366	0.291	1	0
ENSMUSG00000026150	Mff	0.0170811	0.00512587	-0.0972327	0.00212308	0.246	0.326	1	0
ENSMUSG00000021764	Ndufs4	0.0170927	0.0131568	-0.0934807	0.013461	0.3195	0.412	1	0
ENSMUSG00000036087	Slain2	0.0171763	0.0101708	-0.0937469	0.0136934	0.164	0.235	1	0
ENSMUSG00000042064	Myo3b	0.0172202	0.00144395	-0.174882	0.0166898	0.194	0.265	1	0
ENSMUSG00000003134	Tbc1d8	0.0172377	0.0163933	-0.0969257	0.0260106	0.563	0.636	1	0
ENSMUSG00000090071	Cdk5r2	0.0172636	0.0192396	0.0925705	0.0235066	0.1375	0.08	1	0
ENSMUSG00000028826	Maco1	0.0172652	0.00123832	-0.09945	0.00582384	0.316	0.398	1	0
ENSMUSG00000046364	Rpl27a	0.0172903	0.00272288	0.106383	0.017589	0.206	0.142	1	0
ENSMUSG00000029319	Coq2	0.017474	0.00941811	-0.0796535	0.0144703	0.123	0.187	1	0
ENSMUSG00000046139	Patl1	0.0176309	0.0131027	-0.0868487	0.0101255	0.071	0.123	1	0
ENSMUSG00000068742	Cry2	0.0176578	0.0116374	-0.103107	0.00889016	0.2005	0.275	1	0
ENSMUSG00000032252	Glce	0.0176643	0.0174196	-0.153139	0.0154863	0.33	0.404	1	0
ENSMUSG00000032175	Tyk2	0.0176665	0.000510822	-0.0747148	0.00252198	0.07	0.12	1	0
ENSMUSG00000039428	Tmem135	0.0177691	0.010561	-0.122399	0.00354215	0.401	0.481	1	0
ENSMUSG00000030986	Dhx32	0.0178547	0.00167038	-0.119985	0.00671884	0.203	0.273	1	0
ENSMUSG00000058317	Ube2e2	0.0179549	0.0201813	-0.129625	0.0331695	0.735	0.807	1	0
ENSMUSG00000028397	Kdm4c	0.0181305	0.00143215	-0.0956098	0.00332835	0.448	0.54	1	0	SFARI					2	0
ENSMUSG00000058076	Sdhc	0.0183112	0.0139771	-0.0786451	0.00729543	0.107	0.168	1	0
ENSMUSG00000028998	Tomm7	0.0183764	0.0256824	0.103771	0.0426106	0.127	0.064	1	0
ENSMUSG00000000538	Tom1l2	0.018553	0.0239696	-0.144499	0.0407756	0.4025	0.497	1	0
ENSMUSG00000086067	Gm16183	0.0185933	0.0229759	0.190736	0.0323277	0.27	0.198	1	0
ENSMUSG00000042719	Naa25	0.0186206	0.010016	0.0870421	0.00919051	0.172	0.112	1	0
ENSMUSG00000036879	Phkb	0.0187829	0.0128571	-0.102265	0.0129485	0.321	0.412	1	0
ENSMUSG00000032985	5730522E02Rik	0.0187889	0.02074	-0.134076	0.0223397	0.9155	0.941	1	0
ENSMUSG00000028653	Trit1	0.0188645	0.0154051	-0.0838413	0.00747358	0.0885	0.144	1	0
ENSMUSG00000116858	Gm49797	0.0188676	0.00865709	-0.101679	0.0064771	0.221	0.299	1	0
ENSMUSG00000020220	Vps13d	0.018925	0.0018145	-0.103837	0.00203013	0.278	0.364	1	0
ENSMUSG00000022637	Cblb	0.0189403	0.0190413	-0.0684372	0.0217316	0.111	0.176	1	0
ENSMUSG00000004040	Stat3	0.0189516	0.000680993	-0.0944198	0.00492822	0.099	0.155	1	0
ENSMUSG00000002981	Clptm1	0.0190034	0.0165311	-0.103124	0.0133353	0.203	0.278	1	0
ENSMUSG00000015143	Actn1	0.0190764	0.0241032	0.16975	0.0317402	0.714	0.655	1	0
ENSMUSG00000038244	Mical2	0.0191715	0.00856138	-0.0835799	0.00935914	0.1365	0.201	1	0
ENSMUSG00000031758	Cdyl2	0.0191856	0.0187423	-0.0689506	0.0191083	0.202	0.286	1	0
ENSMUSG00000021770	Samd8	0.0191928	0.00997952	-0.0694123	0.01636	0.1445	0.214	1	0
ENSMUSG00000040452	Cdh12	0.0193291	0.00566517	0.173645	0.0130371	0.3625	0.283	1	0
ENSMUSG00000021823	Vcl	0.0193798	0.00515251	-0.132128	0.0119783	0.2805	0.361	1	0
ENSMUSG00000020590	Snx13	0.0193842	0.0221198	-0.105375	0.024387	0.29	0.382	1	0
ENSMUSG00000037110	Ralgapa2	0.0194015	0.0167764	-0.109578	0.0193092	0.479	0.561	1	0
ENSMUSG00000028822	Tmem50a	0.0194349	0.00472402	0.11156	0.0020798	0.254	0.184	1	0
ENSMUSG00000030302	Atp2b2	0.0194399	0.0147146	0.115082	0.00814812	0.872	0.877	1	0	SFARI;TADA	0.0229301				2	0
ENSMUSG00000037990	Sh3rf3	0.0194547	0.00898812	-0.133033	0.0146551	0.4575	0.535	1	0	SFARI					2	0
ENSMUSG00000051451	Crebzf	0.0196433	0.0177117	-0.0957	0.0155411	0.201	0.278	1	0
ENSMUSG00000026425	Srgap2	0.0196617	0.025268	-0.111393	0.0554206	0.459	0.561	1	0
ENSMUSG00000042348	Arl15	0.0196664	0.0122826	-0.136853	0.0145667	0.763	0.826	1	0
ENSMUSG00000036817	Sun1	0.0197312	0.00341855	-0.108357	0	0.278	0.358	1	0
ENSMUSG00000025551	Fgf14	0.0197787	0.0254847	0.0777596	0.0133521	1	1	1	0	SFARI					3	0
ENSMUSG00000045045	Lrfn4	0.0198197	0.0153172	0.0691681	0.00734797	0.107	0.059	1	0
ENSMUSG00000018401	Mtmr4	0.0198434	0.0101423	-0.0609656	0.00754731	0.0775	0.131	1	0
ENSMUSG00000037364	Srrt	0.0200173	0.0235758	-0.108601	0.0265561	0.21	0.289	1	0
ENSMUSG00000025439	Clns1a	0.0200332	0.0275188	-0.0985744	0.0347526	0.0925	0.158	1	0
ENSMUSG00000032293	Ireb2	0.0200627	0.0191184	-0.111925	0.00676338	0.1855	0.257	1	0
ENSMUSG00000034345	Gtf2h5	0.0200685	0.0049113	-0.0745353	0.00251576	0.079	0.131	1	0
ENSMUSG00000051934	Spats2	0.0200808	0.00581533	-0.0935263	0.00910845	0.1615	0.233	1	0
ENSMUSG00000003299	Mrpl4	0.0200844	0.0113551	0.0857825	0.00942399	0.146	0.091	1	0
ENSMUSG00000052139	Babam2	0.0200955	0.0279309	-0.13557	0.0629687	0.3465	0.447	1	0
ENSMUSG00000019146	Cacng2	0.0201284	0.0133479	-0.0891398	0.0251382	0.2485	0.332	1	0
ENSMUSG00000025393	Atp5b	0.0202186	0.015871	0.193145	0.00164938	0.4345	0.388	1	0
ENSMUSG00000024556	Me2	0.0202272	0.0192565	-0.0823376	0.0191581	0.1245	0.19	1	0
ENSMUSG00000032959	Pebp1	0.020301	0.00935547	0.14345	0.00419811	0.223	0.16	1	0
ENSMUSG00000084799	Ino80dos	0.0204312	0.0201613	-0.0994727	0.0156775	0.1835	0.257	1	0
ENSMUSG00000032615	Nt5m	0.0204388	0.000587103	-0.0646754	0.00252823	0.072	0.123	1	0
ENSMUSG00000047036	Zfp445	0.0204694	0.00913075	-0.102372	0.0126503	0.377	0.463	1	0
ENSMUSG00000097571	Jpx	0.0204999	0.0115683	-0.0901042	0.00453396	0.163	0.233	1	0
ENSMUSG00000058230	Arhgap35	0.020586	0.0132437	-0.0781273	0.015575	0.1875	0.262	1	0
ENSMUSG00000024384	Iws1	0.0205973	0.00993355	-0.0945372	0.0046056	0.162	0.23	1	0
ENSMUSG00000039037	St6galnac5	0.0206034	0.0105462	-0.142803	0.0190432	0.5425	0.618	1	0
ENSMUSG00000048232	Fbxo10	0.0206043	0.0110417	-0.0817006	0.00242602	0.114	0.174	1	0
ENSMUSG00000059921	Unc5c	0.0206078	0.026247	-0.227496	0.0374897	0.318	0.396	1	0
ENSMUSG00000038860	Garnl3	0.0206169	0.00695038	-0.103842	0.0060904	0.261	0.342	1	0
ENSMUSG00000037287	Tbcel	0.0206441	0.00460904	-0.0856028	0.00235326	0.1405	0.206	1	0	TADA	0.0113737
ENSMUSG00000031591	Asah1	0.0207647	0.0212272	-0.0771709	0.0197665	0.1935	0.275	1	0
ENSMUSG00000027281	Slx4ip	0.0208053	0.00193764	-0.0942535	0.00430439	0.225	0.299	1	0
ENSMUSG00000018697	Aatf	0.0208086	0.0187021	-0.0711754	0.0134526	0.182	0.259	1	0
ENSMUSG00000020271	Fbxw11	0.0208351	0.0135872	-0.0944419	0.0106155	0.2405	0.321	1	0
ENSMUSG00000033808	Tmem87a	0.0208815	0.0262129	-0.110739	0.017589	0.21	0.289	1	0
ENSMUSG00000030657	Xylt1	0.0210313	8.97358e-05	-0.0782737	0.00242026	0.107	0.166	1	0
ENSMUSG00000020366	Mapk9	0.0210587	0.00184034	-0.0884994	0.00226446	0.1805	0.251	1	0
ENSMUSG00000060073	Psma3	0.0212769	0.0017981	-0.121018	0.00364336	0.3835	0.452	1	0
ENSMUSG00000046844	Vat1l	0.0213019	0.004174	-0.0842152	0.0193499	0.195	0.267	1	0
ENSMUSG00000040865	Ino80d	0.0213184	0.0273298	-0.116632	0.0376324	0.2475	0.334	1	0
ENSMUSG00000050587	Lrrc4c	0.0214587	0.0291038	0.166965	0.0474318	0.992	0.989	1	0	SFARI;EAGLE		Limited	1.25	Discordant	1	0
ENSMUSG00000056851	Pcbp2	0.0215541	0.0229766	-0.129238	0.0301541	0.4505	0.535	1	0
ENSMUSG00000036264	Fstl4	0.0215655	0.0200274	-0.120421	0.0226855	0.592	0.679	1	0
ENSMUSG00000021969	Zdhhc20	0.0215731	0.00742154	-0.079135	0.00605426	0.2565	0.342	1	0
ENSMUSG00000032897	Nfyc	0.0215984	0.00678991	-0.0897991	0.00374364	0.346	0.433	1	0
ENSMUSG00000020459	Mtif2	0.0216075	0.000417288	-0.0995387	0.00416384	0.246	0.321	1	0
ENSMUSG00000032376	Usp3	0.0216592	0.0106261	-0.126524	0.00168479	0.4375	0.513	1	0
ENSMUSG00000026502	Desi2	0.0216642	0.0192248	-0.0870841	0.0223806	0.35	0.447	1	0
ENSMUSG00000071253	Slc25a16	0.0217009	0.022245	-0.0648415	0.00760356	0.068	0.12	1	0
ENSMUSG00000078919	Dpm1	0.0217702	0.0153428	-0.0821087	0.00225445	0.1805	0.251	1	0
ENSMUSG00000045083	Lingo2	0.0217936	0.0204901	-0.141528	0.0298338	0.98	0.995	1	0
ENSMUSG00000037111	Setd7	0.0218206	0.0210179	-0.0769321	0.0213774	0.1245	0.19	1	0
ENSMUSG00000021096	Ppm1a	0.0218442	0.0274699	-0.107283	0.0297562	0.238	0.321	1	0
ENSMUSG00000044629	Cnrip1	0.0219034	0.0082239	-0.0773529	0.00249728	0.0855	0.139	1	0
ENSMUSG00000002546	Golga2	0.0219478	0.02031	-0.0522534	0.0150392	0.0725	0.126	1	0
ENSMUSG00000043671	Dpy19l3	0.0220678	0.030259	-0.135407	0.0465159	0.2715	0.364	1	0
ENSMUSG00000030583	Sipa1l3	0.0221553	0.0114677	-0.100092	0.0153078	0.2165	0.289	1	0
ENSMUSG00000018160	Med1	0.0223389	0.00298978	-0.0921025	0.00227964	0.1615	0.23	1	0
ENSMUSG00000051951	Xkr4	0.0223683	0.015226	-0.134542	0.0120321	0.8635	0.901	1	0
ENSMUSG00000089710	Gm15810	0.0224549	0.0220897	-0.071262	0.0231621	0.2285	0.316	1	0
ENSMUSG00000000823	Zfp512b	0.0224613	0.00507413	-0.0681753	0.00470111	0.1405	0.206	1	0
ENSMUSG00000020547	Bzw2	0.022462	0.00926591	-0.0925313	0	0.199	0.273	1	0
ENSMUSG00000060487	Samd5	0.0225444	0.0293937	-0.126477	0.044023	0.579	0.676	1	0
ENSMUSG00000071369	Map3k5	0.0225657	0.0196727	-0.10961	0.0236005	0.2395	0.313	1	0
ENSMUSG00000109854	Gm45345	0.0225699	0.0240705	-0.0666649	0.0152262	0.068	0.12	1	0
ENSMUSG00000031949	Adat1	0.0225814	0.0061971	-0.0798852	0.00505021	0.0735	0.123	1	0
ENSMUSG00000039047	Pigk	0.0226246	0.00260519	-0.152666	0.00311969	0.476	0.553	1	0
ENSMUSG00000020994	Pnn	0.0226445	0.0203882	-0.0903274	0.0136324	0.174	0.246	1	0
ENSMUSG00000040351	Ankib1	0.0226958	0.0234998	-0.120355	0.0315126	0.2925	0.377	1	0
ENSMUSG00000024078	Ttc27	0.0227137	0.0305246	-0.0892342	0.0250047	0.0885	0.15	1	0
ENSMUSG00000030306	Tmtc1	0.0227201	0.0233885	-0.171289	0.0555135	0.5815	0.639	1	0
ENSMUSG00000003273	Car11	0.0227319	0.0282963	0.149986	0.0345843	0.571	0.5	1	0
ENSMUSG00000024736	Tmem132a	0.0227397	0.00746453	0.118883	0.00827704	0.246	0.182	1	0
ENSMUSG00000097392	Thoc2l	0.0228472	0.0129296	-0.0667745	0.0219393	0.19	0.265	1	0
ENSMUSG00000020594	Pum2	0.0228601	0.0278014	-0.106049	0.0392769	0.353	0.447	1	0
ENSMUSG00000025885	Myo5b	0.022863	0.0185181	-0.0783881	0.00990434	0.0935	0.15	1	0
ENSMUSG00000025812	Pard3	0.0229462	0.0028668	-0.153563	0.00658865	0.88	0.914	1	0
ENSMUSG00000085084	4930570G19Rik	0.0229475	0	-0.0615461	0	0.083	0.136	1	0
ENSMUSG00000024483	Ankhd1	0.0229544	0.0133007	-0.127924	0.0228156	0.452	0.532	1	0
ENSMUSG00000038578	Susd1	0.0230849	0.0256483	-0.125582	0.0172544	0.238	0.31	1	0
ENSMUSG00000020741	Cluh	0.023108	0.0237121	0.0800046	0.0117124	0.151	0.094	1	0
ENSMUSG00000039458	Mtmr12	0.0231103	0.00435122	-0.10234	0.00238072	0.1375	0.198	1	0
ENSMUSG00000028745	Capzb	0.0231822	0.0136472	-0.0723518	0.00233175	0.147	0.214	1	0
ENSMUSG00000033014	Trim33	0.0233569	0.0199881	-0.11671	0.0245374	0.334	0.417	1	0	SFARI					2	0
ENSMUSG00000028156	Eif4e	0.0233595	0.0279557	-0.114797	0.0277751	0.242	0.321	1	0	SFARI;EAGLE;TADA	0.0790774	Limited	3.6	Discordant	2	0
ENSMUSG00000047804	Akap10	0.0233702	0.021523	-0.0905991	0.0165208	0.2525	0.337	1	0
ENSMUSG00000033543	Gtf2a2	0.0235158	0.00891738	-0.0882597	0.00476702	0.131	0.193	1	0
ENSMUSG00000015755	Tab2	0.0235489	0.000407831	-0.0934762	0.00611474	0.2605	0.342	1	0
ENSMUSG00000005362	Crbn	0.0236071	0.00402775	-0.0668034	0	0.1165	0.176	1	0
ENSMUSG00000021149	Gtpbp4	0.0236276	0.00524707	-0.073302	0.00247307	0.095	0.15	1	0
ENSMUSG00000042846	Lrrtm3	0.0236522	0.0142672	-0.11215	0.0111797	0.873	0.928	1	0
ENSMUSG00000037624	Kcnk2	0.0236629	0.0104166	-0.175096	0.0426553	0.512	0.572	1	0
ENSMUSG00000038518	Jarid2	0.0236868	0.00411151	0.186084	0.0237529	0.654	0.604	1	0	SFARI					2	0
ENSMUSG00000028382	Ptbp3	0.0237152	0.0155044	-0.100039	0.0221778	0.183	0.251	1	0
ENSMUSG00000059669	Taf1b	0.0238404	0.0107564	-0.0700317	0.0112724	0.1735	0.246	1	0
ENSMUSG00000037331	Larp1	0.0238518	0.0237785	-0.0988885	0.0194318	0.226	0.299	1	0
ENSMUSG00000028556	Dock7	0.0238957	0.000853923	-0.095444	0.0251899	0.4355	0.524	1	0
ENSMUSG00000014592	Camta1	0.0239371	0.0269596	-0.148542	0.0252266	0.5265	0.612	1	0
ENSMUSG00000030643	Rab30	0.0240581	0.025215	-0.0922459	0.0376213	0.381	0.471	1	0
ENSMUSG00000040451	Sgms1	0.0240823	0.0101377	-0.125582	0.0172099	0.328	0.404	1	0
ENSMUSG00000027438	Napb	0.0241061	0.0150023	-0.089791	0.0111006	0.1845	0.254	1	0
ENSMUSG00000056201	Cfl1	0.0241265	0.0127047	0.115731	0.00664588	0.186	0.128	1	0
ENSMUSG00000029822	Osbpl3	0.0241518	0.00318391	-0.106931	0.00968801	0.31	0.393	1	0
ENSMUSG00000098760	Gm2164	0.0241995	0.00533612	-0.115664	0.0119491	0.472	0.553	1	0
ENSMUSG00000104106	Gm10848	0.0242654	0.0326014	-0.136083	0.0394094	0.203	0.283	1	0
ENSMUSG00000106093	Gm42722	0.0243664	0.0153153	-0.0961858	0.0115271	0.1605	0.225	1	0
ENSMUSG00000070639	Lrrc8b	0.0243874	0	-0.0831412	0	0.214	0.289	1	0
ENSMUSG00000039131	Gipc2	0.0243912	0.00776284	-0.0923182	0.00449401	0.162	0.227	1	0
ENSMUSG00000066607	Insyn1	0.0243989	0.0193605	0.0999634	0.0136628	0.167	0.11	1	0
ENSMUSG00000041957	Pkp2	0.0244612	0.0313602	-0.0934297	0.0231567	0.0575	0.107	1	0
ENSMUSG00000025223	Ldb1	0.0245278	0.0291615	-0.0698931	0.0222046	0.095	0.155	1	0	SFARI;EAGLE;TADA	0.0826832	Limited	4	Discordant	1	0
ENSMUSG00000029655	N4bp2l2	0.0245978	0.00679856	-0.10389	0.0106265	0.414	0.5	1	0
ENSMUSG00000038485	Socs7	0.0246333	0.00569983	-0.0847108	0	0.2035	0.275	1	0
ENSMUSG00000020102	Slc16a7	0.0246363	0.0031745	-0.0884576	0.0184183	0.2645	0.34	1	0
ENSMUSG00000059486	Kbtbd2	0.0246531	0.00652701	-0.058898	0.00500069	0.0815	0.134	1	0
ENSMUSG00000025162	Csnk1d	0.0247683	0.0138714	0.0791032	0.00946772	0.138	0.086	1	0
ENSMUSG00000034303	Ccdc15	0.0248178	0.0176609	-0.0695585	0.0100755	0.074	0.123	1	0
ENSMUSG00000018648	Dusp14	0.0248234	0.00834879	0.128868	0.0130789	0.1765	0.12	1	0
ENSMUSG00000054099	Slc25a40	0.0248856	0	-0.08092	0	0.11	0.166	1	0
ENSMUSG00000000531	Tamalin	0.0250438	0.00479989	-0.106189	0.00239751	0.127	0.184	1	0
ENSMUSG00000001525	Tubb5	0.025078	0.0211479	0.103452	0.01521	0.214	0.15	1	0
ENSMUSG00000042256	Ptchd4	0.0250926	0.0179438	-0.168463	0.00508799	0.333	0.409	1	0
ENSMUSG00000022387	Brd1	0.0250941	0.0309109	-0.102613	0.0309157	0.2035	0.281	1	0
ENSMUSG00000028830	AU040320	0.0251233	0.0199215	-0.0731367	0.0103991	0.249	0.334	1	0
ENSMUSG00000028403	Zdhhc21	0.0251333	0.0341634	-0.0849733	0.0456514	0.1645	0.246	1	0
ENSMUSG00000049800	Sertad2	0.0251704	0.0204808	-0.109961	0.0167088	0.357	0.439	1	0
ENSMUSG00000021276	Cinp	0.0251746	0.0236216	-0.0789477	0.00997699	0.0925	0.147	1	0
ENSMUSG00000002808	Epdr1	0.0251811	0.0295364	0.0922763	0.0207025	0.167	0.107	1	0
ENSMUSG00000071337	Tia1	0.025466	0.0248004	-0.118967	0.0139641	0.501	0.583	1	0
ENSMUSG00000021500	Ddx46	0.0255123	0.0140535	-0.0730897	0.00649083	0.214	0.291	1	0
ENSMUSG00000033060	Lmo7	0.0255135	0.0146539	-0.0792551	0.01521	0.722	0.813	1	0
ENSMUSG00000040268	Plekha1	0.0255187	0.0238795	-0.0876903	0.0170382	0.2315	0.307	1	0
ENSMUSG00000040524	Zfp609	0.0255721	0.012364	-0.115095	0.0035299	0.405	0.479	1	0
ENSMUSG00000030166	Rad52	0.0256299	0	-0.0636586	0	0.061	0.107	1	0
ENSMUSG00000000339	Rtca	0.0256422	0.0116413	-0.0757718	0.00500069	0.083	0.134	1	0
ENSMUSG00000092083	Kcnb2	0.0257093	0.0329778	-0.172229	0.0550394	0.682	0.746	1	0
ENSMUSG00000035067	Xkr6	0.0257231	0.0119215	-0.120826	0.00681719	0.7875	0.88	1	0
ENSMUSG00000031333	Abcb7	0.0257474	0.0257685	-0.108748	0.0196818	0.2155	0.289	1	0
ENSMUSG00000021693	Kif2a	0.0257784	0.0178058	-0.0951447	0.0103779	0.2555	0.332	1	0
ENSMUSG00000021548	Ccnh	0.0259117	0.0108787	-0.0894617	0.0103568	0.27	0.345	1	0
ENSMUSG00000033577	Myo6	0.0260433	0.0102862	-0.0542595	0.00756596	0.067	0.115	1	0
ENSMUSG00000026799	Med27	0.0261035	0.0254676	-0.0989457	0.00851896	0.247	0.324	1	0
ENSMUSG00000023965	Fbxl17	0.0262014	0.00868956	-0.127535	0.00565698	0.817	0.85	1	0
ENSMUSG00000032192	Gnb5	0.0262592	0.0188703	0.127662	0.00792653	0.492	0.422	1	0
ENSMUSG00000028080	Lrba	0.0263224	0.0109022	-0.0996661	0.0162073	0.821	0.885	1	0	SFARI					2	0
ENSMUSG00000034997	Htr2a	0.0264077	0.0219481	-0.0780404	0.0147849	0.0885	0.142	1	0
ENSMUSG00000051285	Pcmtd1	0.0264617	0.0182131	-0.123229	0.0131803	0.6295	0.709	1	0
ENSMUSG00000071454	Dtnb	0.0264673	0.0248046	-0.120151	0.0257646	0.8475	0.917	1	0
ENSMUSG00000074264	Amy1	0.0264817	0.0304145	-0.0671116	0.0280098	0.199	0.281	1	0
ENSMUSG00000047193	Dync2h1	0.0264941	0.0118336	-0.102663	0.0159262	0.422	0.503	1	0
ENSMUSG00000075229	Ccdc58	0.026523	0.00833604	-0.0753766	0.0024318	0.107	0.163	1	0
ENSMUSG00000025730	Rab40c	0.026529	0.0258521	-0.0968121	0.0124917	0.266	0.345	1	0
ENSMUSG00000049878	Rlf	0.0266484	0.0319581	-0.119475	0.0186427	0.2605	0.34	1	0
ENSMUSG00000062203	Gspt1	0.0267415	0.00500846	-0.0862547	0.00837902	0.247	0.321	1	0
ENSMUSG00000045441	Gprin3	0.0267605	0.0295135	-0.0658078	0.0355899	0.467	0.561	1	0
ENSMUSG00000056919	Cep162	0.0267666	0.0277727	-0.0885835	0.0164353	0.1455	0.211	1	0
ENSMUSG00000099013	Gm27153	0.0267821	0.0222593	-0.07191	0.00992844	0.0885	0.142	1	0
ENSMUSG00000026305	Lrrfip1	0.026835	0.0318864	-0.0694502	0.0167583	0.241	0.329	1	0
ENSMUSG00000031511	Arhgef7	0.0269287	0.00741892	-0.124535	0.00211428	0.258	0.326	1	0
ENSMUSG00000035517	Tdrd7	0.0269443	0.00525127	-0.0787263	0.00215903	0.2235	0.297	1	0
ENSMUSG00000052681	Rap1b	0.0270037	0.0348039	-0.0644512	0.0226427	0.075	0.131	1	0
ENSMUSG00000002107	Celf2	0.0271941	0.0145941	-0.0392687	0.00755476	1	1	1	0	SFARI					2	1
ENSMUSG00000020312	Shc2	0.0272788	0.00637487	-0.0713242	0.00252198	0.0815	0.131	1	0
ENSMUSG00000019828	Grm1	0.027291	0.0278031	-0.118636	0.0242831	0.873	0.909	1	0
ENSMUSG00000097536	2610037D02Rik	0.0273585	0.0308674	-0.102502	0.0234525	0.1495	0.214	1	0
ENSMUSG00000030407	Qpctl	0.0274217	0.00704183	-0.0528563	0.00507533	0.0655	0.112	1	0
ENSMUSG00000001376	Vps50	0.0274374	0.0201938	-0.108436	0.0186049	0.2765	0.35	1	0
ENSMUSG00000078546	Zfp995	0.0274764	0.0263196	-0.0785951	0.0148928	0.095	0.15	1	0
ENSMUSG00000026721	Rabgap1l	0.027523	0.0335479	-0.110826	0.0393023	0.743	0.826	1	0
ENSMUSG00000028833	Ncdn	0.0275738	0.0168573	0.165906	0.01503	0.3265	0.265	1	0
ENSMUSG00000034647	Ankrd12	0.0276068	0.00998259	-0.105817	0.0216882	0.4495	0.529	1	0
ENSMUSG00000021668	Polk	0.0277085	0.000707584	-0.0756259	0.00255354	0.067	0.112	1	0
ENSMUSG00000024726	Carnmt1	0.0277736	0.0300998	-0.0732445	0.0212291	0.1295	0.195	1	0
ENSMUSG00000053333	Dis3l2	0.0279404	0.00780338	-0.0870948	0.00919879	0.369	0.457	1	0
ENSMUSG00000017831	Rab5a	0.0279439	0.0257881	-0.0884231	0.017023	0.1135	0.171	1	0
ENSMUSG00000035649	Zcchc7	0.0281411	0.00596438	-0.099055	0.0106081	0.825	0.888	1	0
ENSMUSG00000099632	2900093K20Rik	0.0281498	0.0330305	-0.0740276	0.0124866	0.0845	0.139	1	0
ENSMUSG00000044150	Bclaf3	0.0282237	0.00205862	-0.0817468	0.00457462	0.16	0.225	1	0
ENSMUSG00000022672	Prkdc	0.0282422	0.0145334	-0.0848194	0.00796988	0.27	0.348	1	0	SFARI					2	0
ENSMUSG00000032324	Tspan3	0.0282487	0.0179752	0.114492	0.0159712	0.286	0.219	1	0
ENSMUSG00000002028	Kmt2a	0.028272	0.00338831	0.160557	0	0.723	0.695	1	0	SFARI;EAGLE;TADA	0.00142415	Definitive	18.55	Concordant	1	1
ENSMUSG00000011306	Sugp1	0.0282977	0.0107154	-0.0853688	0.00921125	0.1605	0.225	1	0
ENSMUSG00000005698	Ctcf	0.0283729	0.0144602	-0.0833586	0.00898807	0.18	0.249	1	0	SFARI;EAGLE;TADA	1.33e-07	Moderate	10.45	Discordant	1	1
ENSMUSG00000037643	Prkci	0.0284059	0.00325194	-0.120357	0.00219149	0.2235	0.286	1	0
ENSMUSG00000001986	Gria3	0.0284299	0.00185486	-0.0945657	0.00879436	0.9425	0.952	1	0	SFARI						1
ENSMUSG00000069089	Cdk7	0.0285649	0.0154463	-0.0762984	0.00923209	0.151	0.217	1	0
ENSMUSG00000034613	Ppm1h	0.0285874	0.0241862	-0.160172	0.0225115	0.265	0.332	1	0
ENSMUSG00000028347	Tmeff1	0.0285903	0.00231917	-0.0746013	0.00832772	0.2515	0.329	1	0
ENSMUSG00000015599	Ttbk1	0.0286485	0.00625329	-0.073302	0.00247307	0.0925	0.144	1	0
ENSMUSG00000048076	Arf1	0.028727	0.0014496	0.0882404	0.00220095	0.219	0.158	1	0
ENSMUSG00000070565	Rasal2	0.0287387	0.00618767	-0.116872	0.00465287	0.664	0.743	1	0
ENSMUSG00000062825	Actg1	0.0288097	0.0402625	0.148058	0.0517573	0.353	0.262	1	0
ENSMUSG00000073643	Wdfy1	0.028816	0.00459956	-0.075862	0	0.1245	0.182	1	0
ENSMUSG00000041649	Klf8	0.029009	0.0386767	-0.0970382	0.0354097	0.1805	0.262	1	0
ENSMUSG00000021373	Cap2	0.0290732	0.0134145	-0.103455	0.013512	0.5175	0.612	1	0
ENSMUSG00000038014	Fam120a	0.0291483	0.0243328	-0.0966518	0.0169556	0.358	0.436	1	0
ENSMUSG00000044452	Zfp507	0.0291907	0.013953	-0.081481	0.00756596	0.0805	0.128	1	0
ENSMUSG00000003452	Bicd1	0.0293043	0.0076354	-0.141707	0.00726081	0.54	0.626	1	0
ENSMUSG00000025544	Tm9sf2	0.0293652	0.00424307	-0.106699	0.0021454	0.242	0.31	1	0
ENSMUSG00000009863	Sdhb	0.0294068	0.0032022	0.0868872	0.0021682	0.2205	0.158	1	0
ENSMUSG00000062627	Mysm1	0.0294202	0.00143765	-0.0671446	0.0132488	0.1885	0.259	1	0
ENSMUSG00000035629	Rubcn	0.0294321	0.0250532	-0.0828881	0.0232581	0.2395	0.316	1	0
ENSMUSG00000097797	Gm26901	0.0294573	0.00769461	-0.0644808	0.00227456	0.1605	0.227	1	0
ENSMUSG00000063015	Ccni	0.0294715	0.00199747	-0.0654434	0.00473383	0.128	0.187	1	0
ENSMUSG00000036646	Man1b1	0.0295737	0.00663427	-0.0528519	0	0.0685	0.115	1	0
ENSMUSG00000036381	P2ry14	0.0296157	0.0277649	-0.105213	0.00634286	0.222	0.294	1	0
ENSMUSG00000025246	Tbl1x	0.0298353	0.0108254	-0.104961	0.00810282	0.4355	0.519	1	0	SFARI					2	0
ENSMUSG00000033943	Mga	0.0298851	0.0333104	-0.120748	0.0290451	0.3675	0.444	1	0
ENSMUSG00000005886	Ncoa2	0.0300071	0.0178311	-0.100504	0.0219057	0.483	0.57	1	0
ENSMUSG00000025316	Banp	0.0300169	0.0294184	-0.105213	0.0245829	0.1915	0.259	1	0
ENSMUSG00000041794	Myrip	0.0302509	0.0424652	-0.0943344	0.0473468	0.1375	0.217	1	0
ENSMUSG00000023235	Ccl25	0.0302782	0.0390638	-0.0965128	0.0272053	0.095	0.152	1	0
ENSMUSG00000022822	Abcc5	0.0303019	0.0190126	-0.0839719	0.0226204	0.5175	0.599	1	0
ENSMUSG00000022800	Fyttd1	0.0303504	0.0211388	-0.0927778	0.0145886	0.25	0.324	1	0
ENSMUSG00000024515	Smad4	0.0304216	0.00443879	-0.065095	0	0.3755	0.476	1	0	SFARI					2	0
ENSMUSG00000033732	Sf3b3	0.0306507	0.0205959	-0.103433	0.00459523	0.1695	0.233	1	0
ENSMUSG00000027953	Slc50a1	0.030684	0.0367665	-0.0720232	0.021835	0.1125	0.174	1	0
ENSMUSG00000021824	Ap3m1	0.0307202	0.0347998	-0.0657481	0.0226204	0.1575	0.227	1	0
ENSMUSG00000041771	Slc24a4	0.030771	0.0211914	-0.0860774	0.0299803	0.3865	0.481	1	0
ENSMUSG00000038916	Soga3	0.0308156	0.0166162	-0.0857828	0.00192298	0.31	0.393	1	0
ENSMUSG00000043542	Zc2hc1a	0.0308368	0.0430467	-0.0962465	0.051368	0.1495	0.227	1	0
ENSMUSG00000025656	Arhgef9	0.0308422	0.0132014	-0.119535	0.00414691	0.7365	0.816	1	0	SFARI;EAGLE		Definitive	14.2	Concordant	1	1
ENSMUSG00000075706	Gpx4	0.0308979	0.032608	0.0971059	0.0209865	0.1375	0.086	1	0
ENSMUSG00000027879	Sec22b	0.0309278	0.0159123	-0.0594826	0.0101005	0.075	0.123	1	0
ENSMUSG00000021684	Pde8b	0.0309428	0.0352545	-0.122804	0.0273738	0.7285	0.818	1	0
ENSMUSG00000038383	Pigu	0.0310144	0.00740344	-0.0858617	0.0068237	0.1725	0.238	1	0
ENSMUSG00000068457	Uty	0.0310454	0.00343517	-0.0806678	0.00674252	0.544	0.658	1	0
ENSMUSG00000025025	Mxi1	0.0310737	0.0291193	-0.10907	0.0162483	0.155	0.217	1	0
ENSMUSG00000009907	Vps4b	0.0310933	0.0284975	-0.0717228	0.018892	0.135	0.198	1	0
ENSMUSG00000024213	Nudt3	0.0314238	0.0235927	-0.0862922	0.0145046	0.115	0.171	1	0
ENSMUSG00000028530	Jak1	0.0315711	0.0398384	-0.0769339	0.0341216	0.1765	0.251	1	0
ENSMUSG00000025255	Zfhx4	0.0315732	0.00897408	-0.0927632	0.012699	0.2235	0.297	1	0
ENSMUSG00000106864	Gtf3c2	0.0316786	0.0136489	-0.0724952	0.00955641	0.131	0.19	1	0
ENSMUSG00000032480	Dhx30	0.0316911	0.0413557	-0.106789	0.0400892	0.286	0.374	1	0	SFARI						1
ENSMUSG00000003154	Foxj2	0.0319234	0.0314032	-0.0738771	0.0174387	0.087	0.139	1	0
ENSMUSG00000001630	Stk38l	0.0319651	0.035306	-0.0654224	0.0199058	0.086	0.139	1	0
ENSMUSG00000020610	Amz2	0.0320642	0.0247645	-0.0800217	0.0145391	0.115	0.171	1	0
ENSMUSG00000028248	Pnisr	0.032071	0.00250774	-0.0726146	0.0057864	0.702	0.799	1	0
ENSMUSG00000022000	Zc3h13	0.0322223	0.0395798	-0.0834127	0.0220579	0.3465	0.439	1	0
ENSMUSG00000030058	Copg1	0.0322489	0	0.0943274	0	0.227	0.166	1	0
ENSMUSG00000032826	Ank2	0.032392	0.0282308	-0.109313	0.019455	0.933	0.973	1	0	SFARI;EAGLE;TADA	0.00174365	Moderate	10.8	Discordant	1	0
ENSMUSG00000042078	Svop	0.0325003	0.00653141	-0.0945419	0.0100113	0.289	0.366	1	0
ENSMUSG00000019990	Pde7b	0.0325173	0.0177666	-0.144026	0.0124091	0.9695	0.981	1	0
ENSMUSG00000036698	Ago2	0.0326251	0.0307742	-0.106634	0.0250946	0.329	0.406	1	0	SFARI					2	0
ENSMUSG00000048897	Zfp710	0.0326393	0.0203009	-0.078927	0.0143347	0.13	0.187	1	0
ENSMUSG00000034681	Rnps1	0.0326414	0.00112789	-0.0693669	0.00233709	0.142	0.203	1	0
ENSMUSG00000030020	Prickle2	0.032671	0.0399525	-0.123463	0.0340325	0.487	0.583	1	0	SFARI					2	0
ENSMUSG00000031467	Agpat5	0.0328908	0.00364609	-0.0699931	0.0023587	0.1405	0.201	1	0
ENSMUSG00000034820	Cpsf7	0.032984	0.0353372	-0.0835659	0.0343514	0.1615	0.227	1	0	TADA	0.0252972
ENSMUSG00000021038	Vipas39	0.0329942	0.0416051	-0.0780991	0.0236154	0.1365	0.203	1	0
ENSMUSG00000028229	Rmdn1	0.033116	0.0389602	-0.0964556	0.0502804	0.397	0.484	1	0
ENSMUSG00000021537	Cetn3	0.0331508	0.0143589	-0.082463	0.00226446	0.18	0.246	1	0
ENSMUSG00000074781	Ube2n	0.0332198	0.038914	-0.103683	0.0210345	0.154	0.217	1	0
ENSMUSG00000039988	Ankrd13c	0.0332522	0.0174383	-0.0787328	0.0064771	0.222	0.291	1	0
ENSMUSG00000071252	2210408I21Rik	0.0332901	0.0454278	-0.136459	0.062386	0.3875	0.473	1	0
ENSMUSG00000037361	Sf3b6	0.0333274	0.0270504	-0.0620041	0.00995266	0.083	0.134	1	0
ENSMUSG00000021338	Carmil1	0.0333303	0.00214119	-0.113704	0.00217282	0.218	0.281	1	0
ENSMUSG00000115099	1700087I21Rik	0.0334396	0.0317962	-0.0763318	0.0100755	0.0815	0.131	1	0
ENSMUSG00000024302	Dtna	0.0334701	0.0099805	-0.0867977	0.00145423	0.5145	0.615	1	0
ENSMUSG00000063087	Gm10125	0.0334702	0.0303616	-0.0617229	0.019556	0.206	0.283	1	0
ENSMUSG00000036611	Eepd1	0.0335873	0.0161652	-0.0750083	0.00473383	0.127	0.184	1	0
ENSMUSG00000046138	9930021J03Rik	0.033675	0.000786944	-0.104388	0	0.4855	0.572	1	0
ENSMUSG00000053774	Ubxn7	0.0337767	0.0415248	-0.0637911	0.011821	0.1335	0.201	1	0
ENSMUSG00000021719	Rgs7bp	0.0338242	0.0467267	-0.13717	0.0580376	0.7715	0.853	1	0
ENSMUSG00000056310	Tyw1	0.0338411	0.0253665	-0.0778363	0.00983275	0.1045	0.158	1	0
ENSMUSG00000039202	Abhd2	0.0339061	0.0161622	-0.0797151	0.0137461	0.293	0.372	1	0
ENSMUSG00000029757	Dync1i1	0.0339983	0.015245	-0.0863189	0.010481	0.3955	0.481	1	0
ENSMUSG00000033423	Eri3	0.0341675	0.038955	-0.105912	0.036729	0.279	0.356	1	0
ENSMUSG00000034912	Mdga2	0.0342409	0.0302413	-0.074224	0.029459	0.997	1	1	0	SFARI					2	0
ENSMUSG00000026019	Wdr12	0.0343778	0.0339209	-0.0680898	0.0168225	0.115	0.171	1	0
ENSMUSG00000042686	Jph1	0.0344322	0.0177506	-0.0816094	0.0422478	0.218	0.289	1	0
ENSMUSG00000036306	Lzts1	0.0344761	0.00184634	-0.127944	0.00511349	0.4535	0.519	1	0
ENSMUSG00000086220	Gm16599	0.0344957	0.0396938	-0.0894569	0.0269656	0.1805	0.251	1	0
ENSMUSG00000031561	Tenm3	0.0345415	0.000555755	0.178587	0.0157099	0.635	0.583	1	0
ENSMUSG00000015112	Slc25a13	0.03459	0.0360375	-0.0491651	0.0121882	0.088	0.142	1	0
ENSMUSG00000022680	Pdxdc1	0.0346499	0.0258529	-0.060334	0.00916985	0.159	0.225	1	0
ENSMUSG00000105561	Gm43462	0.0347623	0.046824	-0.0738023	0.0305301	0.0655	0.118	1	0
ENSMUSG00000021087	Rtn1	0.0348089	0.0118868	0.121364	0.00341527	0.9305	0.922	1	0
ENSMUSG00000058587	Tmod3	0.0350115	0.0254761	-0.0814133	0.0162483	0.1525	0.214	1	0
ENSMUSG00000028637	Ccdc30	0.035181	0.0437156	-0.0870367	0.0262149	0.214	0.291	1	0
ENSMUSG00000011831	Evi5	0.0352884	0.0104497	-0.0841869	0.00182985	0.3545	0.433	1	0
ENSMUSG00000021240	Abcd4	0.0352889	0.00836339	-0.0579242	0.00491634	0.0975	0.15	1	0
ENSMUSG00000085609	1700016P03Rik	0.0353	0.0380201	0.173816	0.0627408	0.237	0.171	1	0
ENSMUSG00000045257	Morn2	0.035427	0.0484033	-0.0897945	0.0320747	0.102	0.163	1	0
ENSMUSG00000062202	Btbd9	0.0356454	0.0383843	-0.0903786	0.0177078	0.286	0.364	1	0
ENSMUSG00000031618	Nr3c2	0.0357324	0.0333695	-0.134487	0.0242261	0.5265	0.612	1	0	SFARI					1	1
ENSMUSG00000061755	Bod1l	0.0357385	0.0031817	-0.0792223	0.00651849	0.217	0.283	1	0
ENSMUSG00000117011	E130008D07Rik	0.0358103	0.0249056	-0.0727957	0.0150762	0.076	0.123	1	0
ENSMUSG00000006057	Atp5g1	0.0358392	0.0117165	0.135774	0.00407242	0.258	0.201	1	0
ENSMUSG00000044471	Lncpint	0.0358624	0.0316296	-0.0948235	0.0166824	0.8995	0.939	1	0
ENSMUSG00000028137	Celf3	0.0358724	0.0488942	0.123918	0.0486764	0.364	0.281	1	0
ENSMUSG00000035711	Dok3	0.0358729	0.0235478	-0.0646843	0.00758471	0.076	0.123	1	0
ENSMUSG00000043410	Hfm1	0.0359296	0.0209114	-0.0721171	0.00729543	0.1	0.152	1	0
ENSMUSG00000064202	Spata6l	0.0360959	0.00903084	-0.0693781	0.00502533	0.0815	0.128	1	0
ENSMUSG00000000085	Scmh1	0.0361143	0.0203	-0.115751	0.00250649	0.6285	0.706	1	0
ENSMUSG00000024883	Rin1	0.0362046	0.0204549	-0.0630044	0.00738343	0.1	0.152	1	0
ENSMUSG00000021130	Galnt16	0.0362578	0.00613381	-0.0450628	0.00239751	0.1085	0.163	1	0
ENSMUSG00000055835	Zfp1	0.0362977	0.0132423	-0.0754667	0.00912883	0.1605	0.222	1	0
ENSMUSG00000031840	Rab3a	0.0363051	0.0107836	0.101955	0	0.206	0.15	1	0
ENSMUSG00000021665	Hexb	0.0363523	0.0263448	0.09098	0.0133645	0.191	0.134	1	0
ENSMUSG00000014554	Dguok	0.0363661	0.0234669	-0.0937489	0.0176652	0.205	0.27	1	0
ENSMUSG00000056629	Fkbp2	0.0363918	0.0407549	0.147763	0.0243385	0.2485	0.184	1	0
ENSMUSG00000033253	Szt2	0.0364142	0.0222738	-0.0703153	0.00745538	0.09	0.139	1	0
ENSMUSG00000063316	Rpl27	0.0364173	0.00536008	0.0702139	0.00484628	0.1165	0.072	1	0
ENSMUSG00000038879	Nipal2	0.0364239	0.0176542	-0.0785223	0.0131633	0.205	0.273	1	0
ENSMUSG00000021709	Erbin	0.0364305	0.0435272	-0.10489	0.0285872	0.3795	0.465	1	0	SFARI					2	0
ENSMUSG00000058546	Rpl23a	0.0364396	0.0471146	0.0818289	0.0299048	0.174	0.112	1	0
ENSMUSG00000041697	Cox6a1	0.0364756	0.0244439	0.163432	0.00918224	0.329	0.27	1	0
ENSMUSG00000013662	Atad1	0.036496	0.0252169	-0.0912198	0.0152751	0.2195	0.286	1	0
ENSMUSG00000078722	Gm12394	0.0365102	0.00525554	-0.0835796	0.0180162	0.187	0.249	1	0
ENSMUSG00000037475	Thoc2	0.0366186	0.0165922	-0.104803	0.00149252	0.556	0.628	1	0
ENSMUSG00000037486	Asxl2	0.036626	0.0063287	-0.0718677	0.00672252	0.413	0.503	1	0
ENSMUSG00000041684	Bivm	0.0366621	0.0272384	-0.0513372	0.012736	0.063	0.107	1	0
ENSMUSG00000026289	Atg16l1	0.0366904	0.0457199	-0.0797947	0.0345155	0.286	0.374	1	0
ENSMUSG00000025949	Pikfyve	0.0367841	0.00961316	-0.081501	0.00408874	0.2645	0.334	1	0
ENSMUSG00000037818	Abhd18	0.0368809	0.00978519	-0.0933079	0.00649083	0.223	0.289	1	0
ENSMUSG00000034290	Nek9	0.036974	0.0340825	-0.108533	0.0177035	0.2155	0.278	1	0
ENSMUSG00000021116	Eif2s1	0.0370819	0.0180053	-0.0579715	0.00760356	0.0725	0.118	1	0
ENSMUSG00000031967	Afg3l1	0.0370905	0.0079404	-0.0824662	0.00480067	0.1295	0.184	1	0
ENSMUSG00000038122	Tbc1d32	0.0372917	0.013062	-0.0838461	0.0149866	0.2235	0.291	1	0
ENSMUSG00000050022	Amz1	0.0372983	0.0267734	-0.0845412	0.0142017	0.139	0.198	1	0
ENSMUSG00000025413	Ttc4	0.0373764	0.0252489	-0.0655209	0.0045139	0.1775	0.243	1	0
ENSMUSG00000063457	Rps15	0.0373778	0.0275241	0.108002	0.0122664	0.254	0.19	1	0
ENSMUSG00000004031	Brinp2	0.0374295	0.0182524	-0.0908238	0.0183447	0.263	0.334	1	0
ENSMUSG00000029534	St7	0.037455	0.0412694	-0.0753709	0.021861	0.37	0.457	1	0	SFARI					2	0
ENSMUSG00000031954	Cfdp1	0.037557	0.0306204	-0.0582597	0.0204262	0.159	0.225	1	0
ENSMUSG00000021501	Caml	0.0376525	0.0084147	-0.0828423	0.00709254	0.1335	0.19	1	0
ENSMUSG00000025616	Usp16	0.0377895	0.0175907	-0.0811017	0.00873786	0.221	0.289	1	0
ENSMUSG00000003226	Ranbp2	0.0380656	0.0269675	0.165323	0.0442734	0.5805	0.513	1	0
ENSMUSG00000063568	Jazf1	0.0381392	0.00723154	-0.084921	0.00156583	0.477	0.578	1	0
ENSMUSG00000030000	Add2	0.0382047	0.0392357	-0.0982748	0.0300554	0.4375	0.508	1	0
ENSMUSG00000027810	Eif2a	0.0383726	0.0181057	-0.0741707	0.00686965	0.17	0.233	1	0
ENSMUSG00000086728	Man2c1os	0.038383	0.0216185	-0.059886	0.0222046	0.0935	0.144	1	0
ENSMUSG00000038702	Dsel	0.0384606	0.00608374	-0.102975	0	0.1165	0.166	1	0
ENSMUSG00000024603	Dctn4	0.0385409	0.038986	-0.0867999	0.0225704	0.1725	0.238	1	0
ENSMUSG00000022010	Tsc22d1	0.0386006	0.0226168	-0.118039	0.017742	0.694	0.802	1	0
ENSMUSG00000034858	Fam214a	0.0387876	0.00342425	-0.0796884	0.0058911	0.2995	0.377	1	0
ENSMUSG00000037428	Vgf	0.0387947	0.0218911	0.0868856	0.00851896	0.2405	0.179	1	0
ENSMUSG00000034667	Xpot	0.0388843	0.048067	-0.0647667	0.0263741	0.122	0.184	1	0
ENSMUSG00000049076	Acap2	0.0389688	0.0518097	-0.163674	0.0554753	0.6805	0.733	1	0
ENSMUSG00000024044	Epb41l3	0.0389866	0.00970155	-0.101331	0.00873163	0.544	0.631	1	0
ENSMUSG00000061244	Exoc5	0.0390075	0.00516007	-0.0886053	0.00391609	0.317	0.388	1	0	SFARI					2	0
ENSMUSG00000040811	Eml2	0.0391026	0.0272807	-0.0577489	0.0138797	0.1525	0.217	1	0
ENSMUSG00000015189	Casd1	0.0391905	0.0103583	-0.0800132	0.00894865	0.1915	0.257	1	0
ENSMUSG00000020273	Papolg	0.039326	0.0417426	-0.0927468	0.0193397	0.119	0.174	1	0	SFARI;TADA	0.0648232				2	0
ENSMUSG00000000088	Cox5a	0.0394546	0.0231183	0.147619	0.00192661	0.29	0.233	1	0
ENSMUSG00000055254	Ntrk2	0.0394579	0.0195965	-0.2095	0.00871175	0.7235	0.757	1	0	SFARI						1
ENSMUSG00000020694	Tlk2	0.0395899	0.0535621	-0.11532	0.040327	0.2955	0.374	1	0	SFARI;EAGLE;TADA	0.00750723	Definitive	13.25	Concordant	1	1
ENSMUSG00000020790	Ankfy1	0.039607	0.0511115	-0.0865263	0.0433245	0.214	0.291	1	0
ENSMUSG00000036391	Sec24a	0.0396695	0.0539595	-0.111993	0.0447782	0.2355	0.316	1	0
ENSMUSG00000029439	Sfswap	0.0396943	0.0521854	-0.0919487	0.0357197	0.1935	0.267	1	0
ENSMUSG00000039048	Foxred1	0.0397619	0.0406696	-0.0614551	0.017742	0.071	0.118	1	0
ENSMUSG00000042042	Csgalnact2	0.0397851	0.0509811	-0.09959	0.0310242	0.1285	0.19	1	0
ENSMUSG00000041958	Pigs	0.0399242	0.0498893	-0.0602673	0.0204546	0.0605	0.107	1	0
ENSMUSG00000057265	Bbof1	0.0401344	0.034594	-0.0680794	0.0187617	0.1405	0.201	1	0
ENSMUSG00000062380	Tubb3	0.0403108	0.0209505	-0.0869124	0.00904786	0.178	0.241	1	0
ENSMUSG00000019806	Aig1	0.0404318	0.011517	-0.0824828	0.0109107	0.3705	0.447	1	0
ENSMUSG00000002489	Tiam1	0.0405126	0.0176324	-0.153512	0.027595	0.436	0.495	1	0
ENSMUSG00000057359	Gm17494	0.0405135	0.0201547	-0.0894765	0.00483479	0.127	0.179	1	0
ENSMUSG00000029167	Ppargc1a	0.0405448	0.00955135	-0.0889005	0	0.2165	0.281	1	0
ENSMUSG00000029403	Cdkl2	0.0405628	0.0349329	-0.0885421	0.0158515	0.182	0.246	1	0
ENSMUSG00000026842	Abl1	0.040628	0.0253063	-0.0803736	0.0134822	0.1845	0.246	1	0
ENSMUSG00000020705	Ddx42	0.0406849	0.0475692	-0.0989723	0.0272613	0.2525	0.326	1	0
ENSMUSG00000038248	Sobp	0.0406961	0.0245408	-0.0656713	0.00500069	0.082	0.128	1	0
ENSMUSG00000022681	Ntan1	0.0408154	0.00821648	-0.069709	0	0.0765	0.12	1	0
ENSMUSG00000027366	Sppl2a	0.0411318	0.00117445	-0.0761563	0	0.3225	0.404	1	0
ENSMUSG00000042323	Pbrm1	0.0411768	0.0162181	-0.109726	0.00555936	0.353	0.43	1	0
ENSMUSG00000113136	Gm19951	0.0415113	0.0176722	0.0896363	0.0022347	0.199	0.144	1	0
ENSMUSG00000030861	Acadsb	0.0415415	0.0185035	-0.0750362	0.00726081	0.111	0.163	1	0
ENSMUSG00000040620	Dhx33	0.0417281	0.0515068	-0.0496713	0.0153024	0.0605	0.107	1	0
ENSMUSG00000025192	Entpd7	0.0419706	0.0291799	-0.0587003	0.00228988	0.1565	0.219	1	0
ENSMUSG00000038954	Supt3	0.0421235	0.0105906	-0.117409	0.0172909	0.227	0.286	1	0
ENSMUSG00000027177	Hipk3	0.0422369	0.0219802	-0.0678223	0.0146184	0.229	0.294	1	0
ENSMUSG00000024054	Smchd1	0.0423119	0.0466203	-0.0923017	0.0198092	0.294	0.372	1	0
ENSMUSG00000038181	Chpf2	0.0425211	0.0349647	0.100376	0.0152425	0.209	0.152	1	0
ENSMUSG00000022948	Setd4	0.0425842	0.0343047	-0.069873	0.0279508	0.2205	0.291	1	0
ENSMUSG00000027708	Dcun1d1	0.0425864	0.0052822	-0.0772861	0.0110048	0.206	0.27	1	0
ENSMUSG00000040990	Sh3kbp1	0.0426105	0.0118577	-0.107901	0.0109253	0.5815	0.644	1	0
ENSMUSG00000041231	Ublcp1	0.0426484	0.0112559	-0.0280187	0.00500069	0.0655	0.11	1	0
ENSMUSG00000043340	6530409C15Rik	0.042704	0.0186837	-0.063348	0	0.0695	0.112	1	0
ENSMUSG00000018509	Cenpv	0.0430042	0.0467575	-0.089307	0.0242639	0.202	0.27	1	0
ENSMUSG00000041624	Gucy1a2	0.0431493	0.0460744	-0.107967	0.0173329	0.6535	0.725	1	0	SFARI					2	0
ENSMUSG00000018995	Nars2	0.0432056	0.0188983	-0.0766949	0.0206096	0.265	0.337	1	0
ENSMUSG00000002728	Naa20	0.0432174	0.0100573	-0.0754922	0.00699527	0.1535	0.211	1	0
ENSMUSG00000027130	Slc12a6	0.0433871	0.0280125	-0.0839151	0.0135719	0.1845	0.246	1	0
ENSMUSG00000049176	Frmpd4	0.043392	0.00982748	-0.104192	0.0230441	0.937	0.968	1	0	SFARI						1
ENSMUSG00000061603	Akap6	0.0434328	0.00311517	-0.0729612	0.00146994	0.8905	0.944	1	0
ENSMUSG00000066571	Garre1	0.0434368	0.0493019	-0.0670097	0.0165496	0.115	0.171	1	0
ENSMUSG00000054453	Sytl5	0.0434518	0.0328997	-0.0912727	0.0116856	0.1535	0.211	1	0
ENSMUSG00000026281	Dtymk	0.0434973	0.0307727	0.0882627	0.00685427	0.1725	0.12	1	0
ENSMUSG00000035521	Gnptg	0.0435669	0.03707	0.136683	0.0147582	0.357	0.299	1	0
ENSMUSG00000063801	Ap3s2	0.0436702	0.0344301	-0.0797065	0.0100755	0.083	0.128	1	0
ENSMUSG00000071415	Rpl23	0.0437211	0.0553319	0.112041	0.0420964	0.178	0.12	1	0
ENSMUSG00000032118	Fez1	0.0437969	0.0261101	-0.0786979	0.00914929	0.179	0.241	1	0
ENSMUSG00000028243	Ubxn2b	0.04382	0.0237268	-0.0891719	0.0134526	0.18	0.243	1	0
ENSMUSG00000048330	Ric3	0.0439559	0.0257478	-0.0678698	0.00467955	0.1445	0.203	1	0
ENSMUSG00000040586	Ofd1	0.0439662	0.00814487	-0.0683564	0.00241453	0.119	0.171	1	0	SFARI					2	0
ENSMUSG00000085335	Gm13684	0.0441872	0.025964	-0.0675992	0.00250957	0.076	0.12	1	0
ENSMUSG00000033308	Dpyd	0.0443274	0.000189979	-0.0841993	0.00490453	0.083	0.128	1	0	SFARI					2	0
ENSMUSG00000030421	Uri1	0.0443723	0.0170089	-0.0730105	0.00705982	0.392	0.479	1	0
ENSMUSG00000030303	Far2	0.0446716	0.0191305	-0.0771107	0.00658865	0.197	0.259	1	0
ENSMUSG00000024304	Cdh2	0.0446834	0.0307431	-0.0858072	0.0448303	0.3705	0.455	1	0
ENSMUSG00000030691	Fchsd2	0.0447987	0.023419	-0.0989795	0.00295693	0.523	0.591	1	0
ENSMUSG00000032382	Snx1	0.0447993	0.0209429	-0.0710913	0.00686965	0.162	0.222	1	0
ENSMUSG00000035024	Ncapd3	0.0448094	0.0189947	-0.0835114	0.00663148	0.207	0.27	1	0
ENSMUSG00000085519	Gm13703	0.0448351	0.0213503	-0.0590529	0.010026	0.0805	0.126	1	0
ENSMUSG00000006418	Rnf114	0.0449613	0.0247045	-0.0762266	0.00962403	0.124	0.176	1	0
ENSMUSG00000062991	Nrg1	0.0450869	0.0429954	-0.106081	0.0212779	0.9985	1	1	0
ENSMUSG00000063511	Snrnp70	0.045143	0.0157622	0.128326	0.0184813	0.814	0.816	1	0
ENSMUSG00000006215	Zbtb17	0.0452042	0.0562351	-0.0847181	0.0313914	0.119	0.176	1	0
ENSMUSG00000040112	Mrps35	0.0452167	0.0498934	-0.0593915	0.0201516	0.078	0.126	1	0
ENSMUSG00000038690	Atp5j2	0.045276	0.0413352	0.0875554	0.0249657	0.176	0.123	1	0
ENSMUSG00000020354	Sgcd	0.045286	0.0160714	-0.183654	0.0494783	0.5615	0.628	1	0
ENSMUSG00000024234	Mtpap	0.0453189	0.0189688	-0.0718934	0.0115795	0.1605	0.219	1	0
ENSMUSG00000024502	Jakmip2	0.0454916	0.0528982	-0.0936725	0.0286039	0.4775	0.561	1	0
ENSMUSG00000038495	Otud7b	0.0455274	0.0120556	-0.0524674	0	0.1255	0.182	1	0
ENSMUSG00000029422	Rsrc2	0.0460224	0.0337648	-0.0793529	0.0192122	0.309	0.39	1	0
ENSMUSG00000026245	Farsb	0.0460275	0.0416841	-0.078218	0.017476	0.2205	0.289	1	0
ENSMUSG00000028957	Per3	0.0461552	0.025517	-0.0830449	0.0118484	0.14	0.195	1	0
ENSMUSG00000042439	Zfp532	0.0461748	0.0463475	-0.0904804	0.0247319	0.2565	0.329	1	0
ENSMUSG00000016495	Plgrkt	0.046233	0.0481897	-0.0723772	0.0190686	0.1295	0.187	1	0
ENSMUSG00000067713	Prkag1	0.046331	0.0538297	-0.0729558	0.0288059	0.1175	0.174	1	0
ENSMUSG00000040860	Crocc	0.0463465	0.0135537	0.150508	0.00631667	0.488	0.439	1	0
ENSMUSG00000102869	Norad	0.0463515	0.0250753	0.0995357	0	0.2085	0.155	1	0
ENSMUSG00000028078	Dclk2	0.0464956	0.0619031	-0.0901406	0.0474569	0.336	0.428	1	0
ENSMUSG00000054737	Zfp182	0.0465924	0.0657159	-0.0864572	0.0647925	0.151	0.233	1	0
ENSMUSG00000024271	Elp2	0.0466739	0.0261626	-0.0668196	0.00966964	0.116	0.168	1	0	SFARI					2	1
ENSMUSG00000020255	Nopchap1	0.0466795	0.0023211	-0.0717145	0.00866366	0.202	0.265	1	0
ENSMUSG00000029647	Pan3	0.0467467	0.0328982	-0.0902103	0.0317167	0.492	0.567	1	0
ENSMUSG00000014426	Map3k4	0.0467695	0.00549519	-0.0748001	0	0.175	0.235	1	0
ENSMUSG00000098202	B830012L14Rik	0.0469789	0.0564365	0.169187	0.0395964	0.7925	0.778	1	0
ENSMUSG00000018425	Dhx40	0.0470022	0.0381645	-0.0995837	0.0166557	0.249	0.316	1	0
ENSMUSG00000053925	Gm9929	0.0470777	0.01047	-0.0538171	0.00484628	0.1005	0.15	1	0
ENSMUSG00000118204	4930414N06Rik	0.0473058	0.0477005	-0.0740187	0.010227	0.06	0.102	1	0
ENSMUSG00000043866	Taf10	0.0474258	0.0256597	0.0594487	0.00969261	0.122	0.078	1	0
ENSMUSG00000037852	Cpe	0.0474366	0.0115984	0.103993	0.0106822	0.5145	0.452	1	0
ENSMUSG00000025776	Crispld1	0.0474389	0.031526	-0.0937555	0.0072095	0.115	0.166	1	0
ENSMUSG00000016409	Nkap	0.0475011	0.0104588	-0.0542507	0.00252198	0.079	0.123	1	0
ENSMUSG00000031370	Zrsr2	0.0475081	0.0010828	-0.0480657	0.00255995	0.061	0.102	1	0
ENSMUSG00000032423	Syncrip	0.0476152	0.00355958	-0.0841237	0.00422419	0.238	0.305	1	0	SFARI;TADA	0.00098861				2	0
ENSMUSG00000027340	Slc23a2	0.0477033	0.0140783	-0.103557	0.0062394	0.2725	0.337	1	0
ENSMUSG00000037652	Phc3	0.0478273	0.0286252	-0.0955807	0.0248594	0.322	0.39	1	0
ENSMUSG00000022186	Oxct1	0.0478877	0.0392048	-0.0833019	0.00606325	0.4975	0.586	1	0
ENSMUSG00000042185	Nfrkb	0.0479178	0.06236	-0.0766232	0.0260073	0.142	0.206	1	0
ENSMUSG00000027374	Mrps5	0.0479935	0.0373227	-0.0674458	0.00751026	0.083	0.128	1	0
ENSMUSG00000044250	Pced1b	0.0479977	0.00939906	-0.0777534	0.00691623	0.1615	0.219	1	0
ENSMUSG00000079215	Zfp664	0.0480875	0.021821	-0.077204	0.00238629	0.127	0.179	1	0
ENSMUSG00000079157	Nalf1	0.0481933	0.0157949	-0.231876	0.00348766	0.287	0.34	1	0
ENSMUSG00000058192	Zfp846	0.0482043	0.0327208	-0.0614005	0	0.0935	0.142	1	0
ENSMUSG00000049184	Purg	0.0482289	0.018897	-0.086427	0.00839626	0.255	0.321	1	0
ENSMUSG00000060450	Rnf14	0.0483119	0.0391826	-0.0754298	0.00670412	0.1855	0.249	1	0
ENSMUSG00000057335	Cep170	0.048341	0.0488758	-0.0755269	0.013461	0.313	0.396	1	0
ENSMUSG00000044098	Rsbn1	0.0483717	0.031537	-0.0816558	0.025286	0.3045	0.377	1	0
ENSMUSG00000030729	Pgm2l1	0.0483978	0.0162354	-0.066221	0.0070113	0.1415	0.198	1	0
ENSMUSG00000022139	Mbnl2	0.0486618	0.0569023	-0.0908814	0.0276374	0.7675	0.842	1	0
ENSMUSG00000034566	Atp5h	0.0487344	0.0348045	0.117936	0.0126465	0.234	0.179	1	0
ENSMUSG00000026718	Stam	0.0487874	0.0092752	-0.0735427	0.00889016	0.1995	0.262	1	0
ENSMUSG00000021288	Klc1	0.0489121	0.0665524	0.166439	0.0501101	0.412	0.337	1	0
ENSMUSG00000061578	Ksr2	0.0490133	0.021413	-0.095526	0.0199382	0.611	0.684	1	0
ENSMUSG00000066839	Ecsit	0.0490539	0.0392469	-0.0607265	0.0118484	0.127	0.182	1	0
ENSMUSG00000013736	Trnt1	0.0490698	0.0515617	-0.0589327	0.0150023	0.083	0.131	1	0
ENSMUSG00000031278	Acsl4	0.049087	0.0468758	-0.0821856	0.0238919	0.128	0.182	1	0
ENSMUSG00000022897	Dyrk1a	0.0492175	0.0560503	-0.092346	0.031882	0.3835	0.463	1	0	SFARI;EAGLE;TADA	1.78e-13	Definitive	20.2	Concordant	1	1
ENSMUSG00000026004	Kansl1l	0.0492294	0.0342541	-0.135519	0.00816769	0.464	0.516	1	0
ENSMUSG00000015222	Map2	0.0492836	0.011482	-0.130809	0.00875662	0.794	0.84	1	0
ENSMUSG00000033007	Asic4	0.0495005	0.0548518	0.0817136	0.0346578	0.231	0.168	1	0
ENSMUSG00000027634	Ndrg3	0.0495706	0.0017888	-0.0301455	0.00391609	0.27	0.348	1	0
ENSMUSG00000051166	Eml5	0.0497048	0.0216741	-0.092236	0.0100778	0.779	0.885	1	0
ENSMUSG00000022197	Pdzd2	0.0497505	0.0401626	-0.133333	0.0245609	0.755	0.818	1	0
ENSMUSG00000027239	Mdk	0.0498238	0.0293771	-0.0659875	0.00502533	0.082	0.126	1	0
ENSMUSG00000034867	Ankrd27	0.0498763	0.0554736	-0.0527942	0.0202516	0.0695	0.115	1	0
ENSMUSG00000040339	Fam102b	0.0499942	0.0298544	-0.0695531	0.00839626	0.2445	0.316	1	0
ENSMUSG00000034263	Ints14	0.0500233	0.0421669	-0.0648593	0.0126727	0.0695	0.112	1	0
ENSMUSG00000031647	Mfap3l	0.050266	0.0590871	-0.0689079	0.0301085	0.154	0.217	1	0
ENSMUSG00000086370	Ftx	0.050308	0.018344	-0.101695	0	0.5735	0.628	1	0
ENSMUSG00000025531	Chm	0.0503205	0.041672	-0.0934732	0.0147582	0.36	0.436	1	0	SFARI					3	0
ENSMUSG00000074698	Csnk2a1	0.0503813	0.0530689	-0.084249	0.0326472	0.2765	0.353	1	0	SFARI;EAGLE;TADA	0.0264877	Moderate	6.2	Discordant	1	0
ENSMUSG00000090862	Rps13	0.0504205	0.0109935	0.104463	0.0133645	0.1855	0.136	1	0
ENSMUSG00000044912	Syt16	0.050561	0.0538188	0.178915	0.024995	0.571	0.532	1	0
ENSMUSG00000020847	Rph3al	0.0507155	0.00893516	-0.0811378	0.00240883	0.1245	0.174	1	0
ENSMUSG00000029125	Stx18	0.0507461	0.0204459	-0.0901042	0.00453396	0.186	0.243	1	0
ENSMUSG00000041491	Cep78	0.0507749	0.0258797	-0.0824662	0.00480067	0.119	0.168	1	0
ENSMUSG00000058571	Gpc6	0.0508579	0.0595668	0.101461	0.0401908	0.428	0.348	1	0	SFARI					2	0
ENSMUSG00000055421	Pcdh9	0.0509057	0.0269197	-0.220929	0.0830817	0.9655	0.968	1	0	SFARI					2	0
ENSMUSG00000001016	Ilf2	0.0509502	0.0326625	-0.0815455	0.00948974	0.1365	0.19	1	0	SFARI					2	0
ENSMUSG00000029924	Slc37a3	0.0511498	0.0210797	-0.0528488	0.00736566	0.099	0.147	1	0
ENSMUSG00000024261	Syt4	0.0512621	0.0385197	0.145176	0.0284378	0.377	0.318	1	0
ENSMUSG00000113634	Gm36756	0.0512644	0.0086494	-0.0761631	0.00235326	0.135	0.187	1	0
ENSMUSG00000028468	Rgp1	0.0513132	0.00115343	-0.0407429	0.00254082	0.061	0.102	1	0
ENSMUSG00000060771	Tsga10	0.0513682	0.0292424	-0.0860608	0.00597157	0.29	0.358	1	0
ENSMUSG00000040265	Dnm3	0.0513723	0.0228656	-0.102525	0.029497	0.6375	0.714	1	0
ENSMUSG00000039354	Smarcal1	0.0514594	0.0578916	-0.0638	0.0174387	0.0895	0.139	1	0
ENSMUSG00000018501	Ncor1	0.0514877	0.0565916	-0.098586	0.0350241	0.6245	0.698	1	0	SFARI					2	0
ENSMUSG00000054237	Fra10ac1	0.051491	0.0498663	-0.0709208	0.0146785	0.107	0.158	1	0
ENSMUSG00000027160	Ccdc34	0.0515904	0.0451738	-0.0543362	0.00978559	0.0895	0.139	1	0
ENSMUSG00000039768	Dnajc11	0.0517633	0.00713634	-0.0645879	0.00491634	0.1005	0.147	1	0
ENSMUSG00000022837	Iqcb1	0.0518737	0.0460623	-0.0904423	0.0297562	0.238	0.302	1	0
ENSMUSG00000030432	Rpl28	0.052057	0.0236786	0.116704	0.0105715	0.223	0.171	1	0
ENSMUSG00000036617	Etl4	0.0520593	0.045777	-0.130543	0.0268795	0.5745	0.628	1	0
ENSMUSG00000027164	Traf6	0.052184	0.0371219	-0.0354019	0.0151885	0.063	0.104	1	0
ENSMUSG00000045349	Sh2d5	0.0522355	0.062564	0.115482	0.0314375	0.551	0.487	1	0
ENSMUSG00000062822	4833420G17Rik	0.0522879	0.017521	-0.071194	0.00938066	0.1415	0.195	1	0
ENSMUSG00000010936	Vac14	0.0522888	0.0346324	-0.063366	0.010176	0.071	0.112	1	0
ENSMUSG00000021391	Cenpp	0.0523155	0.0329914	-0.0867768	0.0071589	0.1255	0.176	1	0
ENSMUSG00000074165	Zfp788	0.0524573	0.0443425	-0.0630804	0.0151885	0.0725	0.115	1	0
ENSMUSG00000050069	Grem2	0.0525015	0.0116216	-0.0769859	0.00248512	0.0925	0.136	1	0
ENSMUSG00000051331	Cacna1c	0.052527	0.0498825	-0.10749	0.0212821	0.9385	0.965	1	0	SFARI					1	1
ENSMUSG00000028176	Lrrc7	0.0525332	0.0115572	-0.0677844	0.00428678	1	1	1	0
ENSMUSG00000074968	Ano3	0.0526932	0.0155333	0.104496	0.000645046	0.893	0.877	1	0
ENSMUSG00000014232	Cluap1	0.0527791	0.0616044	-0.0797623	0.0289421	0.115	0.168	1	0
ENSMUSG00000020536	Llgl1	0.0527915	0.00181799	0.0633601	0.00710901	0.139	0.094	1	0
ENSMUSG00000026005	Rpe	0.0528361	0.0621805	-0.0631467	0.0335287	0.1175	0.174	1	0
ENSMUSG00000039706	Ldb2	0.0528479	0.0417556	-0.104663	0.0193982	0.3835	0.452	1	0
ENSMUSG00000040794	C1qtnf4	0.0528946	0.0661814	0.14209	0.0400667	0.5575	0.503	1	0
ENSMUSG00000016346	Kcnq2	0.0529335	0.0295272	0.11025	0.0110628	0.508	0.444	1	0	SFARI					2	0
ENSMUSG00000000804	Usp32	0.0529637	0.0411209	-0.102931	0.025121	0.579	0.658	1	0
ENSMUSG00000040687	Madd	0.0530677	0.0225399	-0.0792384	0.00822698	0.2645	0.329	1	0
ENSMUSG00000039828	Wdr70	0.0531132	0.0638835	-0.104817	0.0263276	0.219	0.283	1	0
ENSMUSG00000030872	Gga2	0.0531606	0.0501352	-0.0762399	0.0211801	0.139	0.195	1	0
ENSMUSG00000022761	Lztr1	0.05326	0.0115695	0.0692121	0.0116589	0.151	0.104	1	0	SFARI					1	0
ENSMUSG00000016477	E2f3	0.0532625	0.0210583	-0.0931094	0	0.14	0.193	1	0
ENSMUSG00000034707	Gns	0.0532716	0.00377089	-0.0571269	0.00969261	0.111	0.16	1	0
ENSMUSG00000033917	Gde1	0.0532917	0.00435523	0.121157	0	0.281	0.227	1	0
ENSMUSG00000022808	Snx4	0.053303	0	-0.0576477	0	0.104	0.152	1	0
ENSMUSG00000048264	Dip2c	0.053308	0.0399685	-0.0879162	0.0176167	0.8435	0.912	1	0	SFARI					2	0
ENSMUSG00000045991	Onecut2	0.0533783	0.00676883	-0.083218	0.00192298	0.29	0.364	1	0
ENSMUSG00000097305	Gm17276	0.0534016	0.0127973	-0.0882803	0.00218212	0.2115	0.273	1	0
ENSMUSG00000042272	Sestd1	0.0534141	0.0185266	-0.0695078	0.00437829	0.206	0.27	1	0
ENSMUSG00000047766	Lrrc49	0.0535433	0.00636776	-0.0456594	0.00504604	0.4105	0.503	1	0
ENSMUSG00000015357	Clpx	0.0535448	0.0316074	-0.0643405	0.0022695	0.175	0.235	1	0
ENSMUSG00000091512	Lamtor3	0.0538558	0.0270654	-0.0702302	0.00484628	0.114	0.163	1	0
ENSMUSG00000037363	Letm2	0.0538825	0.0483006	-0.0755324	0.00953408	0.123	0.176	1	0
ENSMUSG00000054693	Adam10	0.0539499	0.0208202	-0.0588018	0.0127254	0.222	0.289	1	0
ENSMUSG00000024099	Ndufv2	0.0540637	0.0226867	-0.0575123	0.0124409	0.254	0.324	1	0
ENSMUSG00000036769	Wdr44	0.0541638	0.00571785	-0.0776806	0.00902784	0.1775	0.235	1	0
ENSMUSG00000028771	Ptpn12	0.0543012	0.0238572	-0.113659	0.00371636	0.361	0.422	1	0
ENSMUSG00000090063	Dlx6os1	0.0543334	0.0450286	-0.0672754	0.0139067	0.2885	0.361	1	0
ENSMUSG00000054091	1810037I17Rik	0.0544237	0.0297673	0.0553261	0.0144022	0.127	0.083	1	0
ENSMUSG00000015476	Prrt1	0.0546459	0.00530874	0.105096	0.0110286	0.377	0.313	1	0
ENSMUSG00000079177	Fam228a	0.0546977	0.0127195	-0.0654688	0.00255995	0.0655	0.104	1	0
ENSMUSG00000055320	Tead1	0.0547251	0.0339901	-0.0586293	0.00995266	0.082	0.126	1	0
ENSMUSG00000004267	Eno2	0.0548091	0.0266022	0.124011	0.00672252	0.4385	0.382	1	0
ENSMUSG00000005683	Cs	0.0549	0.000125126	-0.0975958	0.00242026	0.118	0.166	1	0
ENSMUSG00000035158	Mitf	0.0549224	0.0722693	-0.0970616	0.0240044	0.199	0.267	1	0
ENSMUSG00000022863	Btg3	0.0550678	0.0544289	-0.0829003	0.0172283	0.102	0.15	1	0
ENSMUSG00000020290	Xpo1	0.0551049	0.0348084	-0.0783558	0.00910845	0.1685	0.225	1	0	SFARI					2	0
ENSMUSG00000101693	Gm19461	0.0551816	0.0283763	0.0656511	0.00955641	0.132	0.088	1	0
ENSMUSG00000036469	Marchf1	0.0553081	0.00948857	0.12374	0.0260475	0.314	0.243	1	0
ENSMUSG00000026764	Kif5c	0.055315	0.0606932	0.115603	0.0370439	0.5265	0.463	1	0	SFARI;TADA	0.017695				2	1
ENSMUSG00000032384	Csnk1g1	0.0554494	0.00505766	-0.0731552	0.00149471	0.536	0.61	1	0	SFARI					3	0
ENSMUSG00000021327	Zkscan3	0.0555204	0.0461637	-0.0606193	0.0183081	0.2635	0.334	1	0
ENSMUSG00000045589	Frrs1l	0.0555654	0.0156005	-0.0730668	0.00441619	0.2035	0.265	1	0
ENSMUSG00000024293	Esco1	0.0555734	0.0713198	-0.0920592	0.0377097	0.2485	0.321	1	0
ENSMUSG00000041961	Znrf3	0.055648	0.0181423	-0.0886737	0.0117548	0.405	0.473	1	0
ENSMUSG00000045658	Pid1	0.0557514	0.0236598	-0.0772119	0.0071589	0.119	0.168	1	0
ENSMUSG00000020121	Srgap1	0.0557646	0.0307925	-0.155564	0.0113856	0.648	0.693	1	0
ENSMUSG00000038467	Chmp4b	0.0558102	0.0607951	-0.0599945	0.0173119	0.095	0.144	1	0
ENSMUSG00000069769	Msi2	0.0559215	0.071595	-0.0848849	0.0382597	0.2155	0.289	1	0
ENSMUSG00000024843	Chka	0.0559683	0.0308276	-0.0951771	0.0107009	0.3955	0.465	1	0
ENSMUSG00000002103	Acp2	0.0559874	0.0239967	-0.0511847	0.00254082	0.067	0.107	1	0
ENSMUSG00000038872	Zfhx3	0.0561663	0.029126	-0.118353	0.0240397	0.4615	0.529	1	0
ENSMUSG00000078490	Cfap74	0.0561931	0.0123619	-0.0678453	0.00892907	0.1915	0.251	1	0
ENSMUSG00000001983	Taco1	0.0561956	0.0329054	-0.0921199	0.00947211	0.337	0.406	1	0
ENSMUSG00000004568	Arhgef18	0.056209	0.0608289	-0.0872124	0.0167829	0.1285	0.182	1	0
ENSMUSG00000038039	Gcc2	0.0562328	0.0634943	-0.0805818	0.0322601	0.2755	0.353	1	0
ENSMUSG00000063430	Wscd2	0.0562736	0.0514575	-0.0776968	0.0272053	0.3165	0.388	1	0
ENSMUSG00000004383	Large1	0.0563082	0.0191726	-0.115434	0.00643044	0.806	0.888	1	0
ENSMUSG00000040972	Igsf21	0.0563739	0.0215744	-0.0587526	0	0.083	0.126	1	0
ENSMUSG00000029524	Sirt4	0.0565063	0.0127968	-0.0621395	0.00498847	0.0895	0.134	1	0
ENSMUSG00000050600	Zfp831	0.0566072	0.0464636	0.072093	0.0180961	0.187	0.134	1	0
ENSMUSG00000027244	Atg13	0.0566269	0.0505406	-0.0732449	0.0158164	0.175	0.235	1	0
ENSMUSG00000031858	Mau2	0.0566354	0.0467297	-0.0824954	0.0138483	0.168	0.225	1	0
ENSMUSG00000005813	Metap1	0.0566372	0.0682998	-0.0641066	0.0175243	0.083	0.131	1	0
ENSMUSG00000067925	Rtl8a	0.0566808	0.06874	0.0888413	0.0333046	0.194	0.136	1	0
ENSMUSG00000032178	Ilf3	0.0568874	0.0285806	-0.0724899	0.00643623	0.2315	0.294	1	0
ENSMUSG00000021103	Mnat1	0.0570737	0.0355791	-0.0717232	0.0215599	0.3045	0.374	1	0
ENSMUSG00000022807	Osbpl11	0.0570802	0.0479657	-0.0567407	0.010227	0.0645	0.104	1	0
ENSMUSG00000042496	Prdm10	0.057142	0.0790432	-0.104823	0.0466304	0.19	0.262	1	0
ENSMUSG00000034951	Cog7	0.0571725	0.0098417	-0.0718387	0.00946772	0.1325	0.182	1	0
ENSMUSG00000031939	Taf1d	0.0572317	0.0398613	-0.0849625	0.0206096	0.27	0.334	1	0
ENSMUSG00000025332	Kdm5c	0.0572783	0.00742126	-0.106257	0.00658865	0.2085	0.267	1	0	SFARI					1	0
ENSMUSG00000028879	Stx12	0.0573309	0.0509777	-0.0602218	0.0241179	0.119	0.171	1	0
ENSMUSG00000037808	Fam76b	0.0574616	0.0750301	-0.0801435	0.0371846	0.158	0.222	1	0
ENSMUSG00000032279	Idh3a	0.0575093	0.0126271	-0.0473643	0.00252198	0.0735	0.115	1	0
ENSMUSG00000042359	Osbpl6	0.0577369	0.0304696	-0.0764275	0.0242489	0.393	0.471	1	0
ENSMUSG00000039630	Hnrnpu	0.0577446	0.0329731	-0.105108	0.0140131	0.595	0.671	1	0	SFARI					1	1
ENSMUSG00000038497	Tmco3	0.057839	0.0142447	-0.0631535	0.00740129	0.0925	0.136	1	0
ENSMUSG00000043940	Wdfy3	0.0578697	0.0591359	-0.0771541	0.0360511	0.374	0.457	1	0	SFARI;EAGLE;TADA	0.0630417	Definitive	17.2	Concordant	1	0
ENSMUSG00000028672	Hmgcl	0.0581074	0.038025	-0.0475064	0.0126413	0.071	0.112	1	0
ENSMUSG00000007564	Ppp2r1a	0.0581409	0.0301154	0.0720484	0.00946772	0.138	0.094	1	0
ENSMUSG00000027006	Dnajc10	0.0582012	0.0161111	-0.0764257	0.00853678	0.222	0.283	1	0
ENSMUSG00000032827	Ppp1r9a	0.0582964	0.0184615	-0.0965125	0.00513279	0.93	0.976	1	0
ENSMUSG00000061458	Nol10	0.0584569	0.0327747	-0.0619912	0.0049763	0.087	0.131	1	0
ENSMUSG00000031918	Mtmr2	0.0584776	0.036139	-0.045038	0.0049763	0.082	0.126	1	0
ENSMUSG00000020948	Klhl28	0.0585186	0.0498758	-0.0682422	0.00988036	0.1005	0.147	1	0
ENSMUSG00000026181	Ppm1f	0.0586317	0.037112	-0.0537552	0.0124866	0.084	0.128	1	0
ENSMUSG00000039067	Psmd7	0.0586437	0.063328	-0.0474666	0.0181767	0.159	0.222	1	0
ENSMUSG00000034586	Hid1	0.0586577	0.0245925	-0.0511847	0.00254082	0.0695	0.11	1	0
ENSMUSG00000010554	Mettl16	0.0586786	0.0168354	-0.0535296	0.0136021	0.167	0.225	1	0
ENSMUSG00000033813	Tcea1	0.0589967	0.0368444	-0.0943856	0.00951186	0.139	0.19	1	0
ENSMUSG00000032030	Cul5	0.0591172	0.0584396	-0.0926505	0.0198864	0.3105	0.382	1	0
ENSMUSG00000040473	Cfap69	0.0591695	0.0713799	-0.067494	0.0195248	0.106	0.158	1	0
ENSMUSG00000057863	Rpl36	0.0591826	0.0691212	0.115316	0.0305193	0.206	0.152	1	0
ENSMUSG00000069049	Eif2s3y	0.0593646	0.0134019	-0.0811102	0.00966964	0.316	0.39	1	0
ENSMUSG00000014959	Gorasp2	0.059508	0.00103341	-0.0680198	0.0114495	0.1615	0.217	1	0
ENSMUSG00000025225	Nfkb2	0.0595441	0.0299936	0.0790076	0.0155411	0.18	0.131	1	0
ENSMUSG00000046330	Rpl37a	0.0596438	0.0708121	0.0949972	0.0303894	0.2155	0.158	1	0
ENSMUSG00000019943	Atp2b1	0.0599084	0.0206467	0.0902023	0.00286373	0.997	0.995	1	0	SFARI					3	0
ENSMUSG00000026944	Abca2	0.0599423	0.0240894	0.0776522	0.00654637	0.226	0.171	1	0
ENSMUSG00000039607	Rbms3	0.0600399	0.0716653	-0.0900463	0.0485873	0.746	0.832	1	0
ENSMUSG00000022890	Atp5j	0.0600826	0.00472444	0.116936	0.00206297	0.2445	0.195	1	0
ENSMUSG00000033792	Atp7a	0.0601529	0.0108825	0.0680604	0.00470111	0.1405	0.096	1	0
ENSMUSG00000051674	Dcun1d4	0.0601681	0.0224313	-0.0537723	0.0146484	0.242	0.31	1	0
ENSMUSG00000022426	Josd1	0.0602066	0.0182159	-0.0569779	0	0.1125	0.16	1	0
ENSMUSG00000029053	Prkcz	0.0602249	0.0679494	-0.0939381	0.0292588	0.5105	0.594	1	0
ENSMUSG00000025372	Baiap2	0.0602603	0.0469915	0.132894	0.0161645	0.849	0.813	1	0
ENSMUSG00000110105	Gm45844	0.0603374	0.0758727	-0.0670411	0.0223669	0.087	0.136	1	0
ENSMUSG00000068917	Clk2	0.0605074	0.0368302	-0.0570956	0.00914929	0.1685	0.227	1	0
ENSMUSG00000042302	Ehbp1	0.0605558	0.0256014	-0.0765232	0.00926003	0.507	0.567	1	0
ENSMUSG00000027674	Pex5l	0.0605665	0.0258972	-0.10649	0.00868209	0.205	0.259	1	0
ENSMUSG00000004980	Hnrnpa2b1	0.0606482	0.0420271	0.123439	0.0209267	0.631	0.615	1	0
ENSMUSG00000041773	Enc1	0.060657	0.00853441	0.0636796	0.00463701	0.159	0.112	1	0	TADA	0.047918
ENSMUSG00000063870	Chd4	0.0606934	0.0631882	0.12791	0.0346784	0.5885	0.537	1	0
ENSMUSG00000027166	Dnajc24	0.0608061	0.0345352	-0.0572214	0.00916985	0.1575	0.214	1	0
ENSMUSG00000022892	App	0.0608303	0.0626353	0.113927	0.0310301	0.849	0.848	1	0
ENSMUSG00000057858	Fam204a	0.0608649	0.02109	-0.0702302	0.00484628	0.1205	0.168	1	0
ENSMUSG00000029199	Lias	0.0608702	0.0417454	-0.0704057	0.00971569	0.107	0.155	1	0
ENSMUSG00000001323	Srr	0.061061	0.0168288	-0.0763543	0.0044354	0.206	0.265	1	0
ENSMUSG00000000600	Krit1	0.0611279	0.0072424	-0.0687367	0.0168369	0.5065	0.58	1	0
ENSMUSG00000039954	Stk32a	0.0611613	0.0523249	-0.119995	0.0230637	0.501	0.58	1	0
ENSMUSG00000019189	Rnf145	0.0614582	0.0589315	-0.075951	0.0157467	0.1845	0.243	1	0
ENSMUSG00000008763	Man1a2	0.0614671	0.0420816	-0.115336	0.00848942	0.5735	0.642	1	0
ENSMUSG00000099895	Gm28153	0.0616195	0.0415952	-0.0580387	0.0119596	0.123	0.174	1	0
ENSMUSG00000021209	Ppp4r4	0.0616486	0.0756231	-0.0920221	0.0420194	0.608	0.706	1	0
ENSMUSG00000029126	Nsg1	0.061667	0.0455988	0.14686	0.0308332	0.3625	0.31	1	0
ENSMUSG00000021650	Ptcd2	0.0616744	0.0115128	0.0690377	0.00476702	0.127	0.086	1	0
ENSMUSG00000074829	2010315B03Rik	0.0619843	0.0606947	-0.0742399	0.0195716	0.107	0.155	1	0
ENSMUSG00000034310	Tmem132d	0.0620168	0.0436986	-0.0797207	0.0165496	0.1125	0.16	1	0
ENSMUSG00000033799	Tasor2	0.0620449	0.0507093	-0.0695489	0.0184925	0.275	0.345	1	0
ENSMUSG00000024045	Akap8	0.0621311	0.0207613	-0.0815181	0.0145588	0.266	0.329	1	0
ENSMUSG00000101585	1600010M07Rik	0.0621414	0.0155289	-0.103228	0.012968	0.218	0.275	1	0
ENSMUSG00000097533	Gm26590	0.0622101	0.0153522	-0.0511936	0.0076225	0.0685	0.107	1	0
ENSMUSG00000020015	Cdk17	0.0622479	0.0211253	-0.12002	0.000880569	0.817	0.88	1	0
ENSMUSG00000033676	Gabrb3	0.062291	0.0714987	-0.0866504	0.0401787	0.959	0.989	1	0	SFARI					1	0
ENSMUSG00000039145	Camk1d	0.0623685	0.0856552	0.130314	0.0339614	0.948	0.955	1	0
ENSMUSG00000034730	Adgrb1	0.0624439	0.00413373	0.168247	0.00541189	0.5765	0.551	1	0
ENSMUSG00000032468	Armc8	0.06264	0.0441174	-0.0817724	0.0191761	0.3385	0.412	1	0
ENSMUSG00000004360	9330159F19Rik	0.0627135	0.0785345	-0.0849262	0.0352567	0.211	0.278	1	0
ENSMUSG00000009927	Rps25	0.0628057	0.0617723	0.0954953	0.0217987	0.2085	0.155	1	0
ENSMUSG00000060657	Marf1	0.0631415	0.0708129	-0.0712312	0.0224215	0.1925	0.257	1	0
ENSMUSG00000004631	Sgce	0.0631451	0.083014	-0.1179	0.0428093	0.271	0.342	1	0
ENSMUSG00000022752	Tomm70a	0.0631905	0.0342409	0.132555	0.0173399	0.5425	0.495	1	0
ENSMUSG00000041552	Ptchd1	0.0633932	0.077738	-0.122237	0.0341978	0.183	0.241	1	0	SFARI;EAGLE		No scorable evidence	0	Discordant	1	0
ENSMUSG00000021192	Golga5	0.0634009	0.0495663	-0.0747069	0.0120443	0.1245	0.174	1	0
ENSMUSG00000055022	Cntn1	0.0634884	0.00535994	-0.0905405	0.00281159	0.778	0.842	1	0
ENSMUSG00000022321	Cdh10	0.063575	0.0664961	-0.147942	0.0490014	0.3835	0.452	1	0	SFARI					2	0
ENSMUSG00000021703	Serinc5	0.063654	0.0735269	-0.0699651	0.0247455	0.1895	0.254	1	0
ENSMUSG00000089699	Gm1992	0.0639112	0.0291257	-0.0346989	0.00992844	0.0775	0.12	1	0
ENSMUSG00000053477	Tcf4	0.0640403	0.00605176	0.0560913	0.00432263	0.1965	0.144	1	0	SFARI;EAGLE;TADA	0.00271594	Definitive	13.5	Concordant	1	1
ENSMUSG00000036009	Mettl25	0.0641607	0.0617357	-0.068404	0.00990434	0.091	0.136	1	0
ENSMUSG00000042105	Inpp5f	0.0642089	0.0151158	-0.0821782	0.00747358	0.3475	0.414	1	0
ENSMUSG00000019188	H13	0.0642373	0	-0.0641303	0	0.107	0.152	1	0
ENSMUSG00000026836	Acvr1	0.0642927	0.0448933	-0.057747	0.0217059	0.3435	0.425	1	0
ENSMUSG00000024805	Pcgf5	0.0643523	0.0656141	-0.0978238	0.0249657	0.179	0.235	1	0
ENSMUSG00000056429	Tgoln1	0.0644682	0.0010095	0.0489055	0.00485782	0.115	0.075	1	0
ENSMUSG00000018565	Elp5	0.0644826	0.0474919	-0.0611044	0.00252198	0.0725	0.112	1	0
ENSMUSG00000021610	Clptm1l	0.0644896	0.0766154	0.0611595	0.0235608	0.147	0.096	1	0
ENSMUSG00000037376	Trmt6	0.0647209	0.021543	-0.07519	0.00948974	0.1285	0.176	1	0
ENSMUSG00000107563	4930587E11Rik	0.0648598	0.0781029	-0.108048	0.0344287	0.1445	0.201	1	0
ENSMUSG00000049553	Polr1a	0.0650464	0.0104496	-0.0731674	0.0023587	0.1405	0.19	1	0
ENSMUSG00000000605	Clcn4	0.0651297	0.0454414	0.0983613	0.0235016	0.2285	0.176	1	0	SFARI					2	1
ENSMUSG00000030102	Itpr1	0.0655333	0.031844	0.0823182	0.00856697	0.971	0.976	1	0	SFARI					2	0
ENSMUSG00000030465	Psd3	0.0656179	0.0235974	-0.114342	0.0193005	0.548	0.628	1	0	SFARI					2	0
ENSMUSG00000058240	Cryzl1	0.0656451	0.0197912	-0.0711167	0.00239751	0.131	0.179	1	0
ENSMUSG00000038010	Ccdc138	0.0656687	0.0604579	-0.060281	0.0173962	0.0845	0.128	1	0
ENSMUSG00000041669	Prima1	0.0656756	0.0773808	-0.0636994	0.0153407	0.0655	0.107	1	0
ENSMUSG00000029234	Tmem165	0.0659514	0.0272164	-0.0714188	0.0115011	0.155	0.206	1	0
ENSMUSG00000041216	Clvs1	0.0659613	0.051324	-0.104801	0.0137437	0.636	0.693	1	0
ENSMUSG00000054823	Nsd3	0.0662512	0.0630518	-0.0679675	0.0306832	0.5145	0.596	1	0
ENSMUSG00000031505	Naxd	0.0662654	0.044457	-0.052126	0.0121014	0.1125	0.16	1	0
ENSMUSG00000028410	Dnaja1	0.0662723	0.0906576	0.121498	0.0490634	0.381	0.302	1	0
ENSMUSG00000014313	Cox6c	0.0663027	0.0364194	0.159806	0.0114624	0.306	0.259	1	0
ENSMUSG00000024081	Cebpz	0.066357	0.0153859	-0.0688494	0	0.2515	0.316	1	0
ENSMUSG00000039703	Nploc4	0.0665669	0.0066715	-0.0600696	0.00912883	0.171	0.227	1	0
ENSMUSG00000085944	1700003D09Rik	0.0666178	0.08949	-0.0939946	0.0394642	0.147	0.209	1	0
ENSMUSG00000079523	Tmsb10	0.0666277	0.0407723	0.072506	0.0116323	0.1525	0.107	1	0
ENSMUSG00000057322	Rpl38	0.0667096	0.0350848	0.0853811	0.0225704	0.175	0.128	1	0
ENSMUSG00000041570	Camsap2	0.0667333	0.072907	-0.0976665	0.0421356	0.293	0.358	1	0
ENSMUSG00000021259	Cyp46a1	0.0667346	0.0811856	0.137623	0.0452724	0.4425	0.385	1	0
ENSMUSG00000021595	Nsun2	0.0667928	0.0132827	-0.0848889	0	0.2085	0.262	1	0
ENSMUSG00000027400	Pdyn	0.0668741	0.0602013	0.0979273	0.0216139	0.2075	0.155	1	0
ENSMUSG00000061136	Prpf40a	0.0669175	0.0647503	-0.0827644	0.0305078	0.373	0.447	1	0
ENSMUSG00000025231	Sufu	0.066935	0.0680687	-0.055797	0.00731286	0.103	0.152	1	0
ENSMUSG00000040697	Dnajc16	0.0669443	0.0267378	-0.0416234	0.0049763	0.083	0.126	1	0
ENSMUSG00000090101	Snhg9	0.0670667	0.0118746	0.0577495	0.00242602	0.1135	0.075	1	0
ENSMUSG00000026229	Psmd1	0.0670686	0.0308911	-0.0734063	0.0108642	0.223	0.286	1	0
ENSMUSG00000034709	Ppp1r21	0.0670871	0.0503584	-0.0855057	0.0113224	0.1845	0.238	1	0
ENSMUSG00000028330	Ncbp1	0.0671086	0.0275394	-0.0597139	0.00663148	0.194	0.254	1	0
ENSMUSG00000024878	Cbwd1	0.0671864	0.0824235	-0.066723	0.0222585	0.098	0.147	1	0
ENSMUSG00000039501	Znfx1	0.0672101	0.0835749	-0.0537424	0.0350598	0.1335	0.193	1	0
ENSMUSG00000046311	Zfp62	0.0672361	0.0344386	-0.0626798	0.00953408	0.127	0.176	1	0
ENSMUSG00000025278	Flnb	0.0672596	0.01929	-0.0946765	0.0191481	0.234	0.289	1	0
ENSMUSG00000037058	Paip2	0.0673029	0.021789	-0.0746332	0.0120321	0.4195	0.5	1	0
ENSMUSG00000020883	Fbxl20	0.0673176	0.0532676	-0.0609363	0.0102322	0.2605	0.329	1	0
ENSMUSG00000025104	Hdgfl3	0.0674675	0.0801781	-0.0690637	0.0412234	0.405	0.492	1	0
ENSMUSG00000037890	Wdr19	0.0675776	0.00459622	-0.0438109	0.00754731	0.075	0.115	1	0
ENSMUSG00000042429	Adora1	0.0677537	0.0323654	0.0746822	0.00935914	0.151	0.107	1	0
ENSMUSG00000042671	Rgs8	0.0677558	0.0377671	0.0790151	0.0087006	0.214	0.16	1	0
ENSMUSG00000027236	Eif3j1	0.0678887	0.0796774	-0.0648762	0.0216292	0.119	0.171	1	0
ENSMUSG00000021681	Aggf1	0.0679597	0.0392006	-0.0606726	0.00751026	0.084	0.126	1	0
ENSMUSG00000045205	Dpy19l4	0.0679695	0.0320227	-0.0917909	0.0153738	0.199	0.254	1	0
ENSMUSG00000005873	Reep5	0.068011	0.0771897	0.0951562	0.0287382	0.1925	0.139	1	0
ENSMUSG00000016559	H3f3b	0.0681283	0.00174543	0.0984366	0.00434103	0.203	0.155	1	0
ENSMUSG00000036278	Macrod1	0.0684067	0.0400307	0.10392	0.0166898	0.23	0.176	1	0
ENSMUSG00000074863	Platr25	0.0684342	0.017698	-0.0508205	0.00756596	0.071	0.11	1	0
ENSMUSG00000025262	Fam120c	0.0684472	0.0419234	-0.116214	0.0193982	0.394	0.449	1	0
ENSMUSG00000067786	Nnat	0.0685601	0.0719932	0.188931	0.016161	0.1495	0.104	1	0
ENSMUSG00000052479	A330008L17Rik	0.0685939	0.0827757	-0.133549	0.046187	0.234	0.294	1	0
ENSMUSG00000064181	Rab3ip	0.0686469	0.0598645	0.0697265	0.00916985	0.1695	0.12	1	0
ENSMUSG00000028149	Rap1gds1	0.0687346	0.0470046	-0.0755695	0.0225632	0.464	0.551	1	0
ENSMUSG00000037791	Phf12	0.0687942	0.0497846	-0.0882051	0.023363	0.3045	0.374	1	0	SFARI;EAGLE;TADA	0.0148716	Moderate	9.5	Discordant	1	0
ENSMUSG00000032913	Lrig2	0.0688274	0.0114819	-0.0896262	0.00622671	0.2685	0.326	1	0
ENSMUSG00000006576	Slc4a3	0.0690691	0.0546475	0.143244	0.0299573	0.4335	0.377	1	0
ENSMUSG00000040818	Dennd6a	0.0690919	0.0637318	-0.0944495	0.0181524	0.361	0.433	1	0
ENSMUSG00000014767	Tbp	0.0691029	0.0510762	-0.0359456	0.0122467	0.091	0.136	1	0
ENSMUSG00000020184	Mdm2	0.069147	0.0512792	-0.0892463	0.0154402	0.214	0.27	1	0
ENSMUSG00000028796	Phc2	0.0691648	0.0918472	-0.0972741	0.0681932	0.463	0.556	1	0
ENSMUSG00000029419	Ajm1	0.0692193	0.0347419	-0.0648041	0.0072095	0.116	0.163	1	0
ENSMUSG00000034687	Fras1	0.0692837	0.0132184	-0.065982	0.00890957	0.604	0.706	1	0
ENSMUSG00000031672	Got2	0.0693985	0.0655281	0.0747098	0.0269063	0.1935	0.142	1	0
ENSMUSG00000050052	Tdrp	0.0694102	0.0738971	-0.0682929	0.0197612	0.1005	0.147	1	0
ENSMUSG00000026113	Inpp4a	0.0695276	0.0637838	-0.0777438	0.0310395	0.4575	0.527	1	0
ENSMUSG00000029290	Zfp326	0.0695351	0.0379547	-0.0645647	0.00466884	0.147	0.201	1	0
ENSMUSG00000028488	Sh3gl2	0.0695718	0.0222149	-0.0842599	0.0070113	0.361	0.43	1	0
ENSMUSG00000026889	Rbm18	0.0695721	0.0294785	-0.057551	0.00754731	0.0805	0.12	1	0
ENSMUSG00000021481	Zfp346	0.0696955	0.0390396	-0.0672844	0.00749188	0.09	0.131	1	0
ENSMUSG00000024817	Uhrf2	0.0697133	0.0786218	-0.0996281	0.0404068	0.2965	0.361	1	0
ENSMUSG00000029672	Fam3c	0.0697421	0.035979	0.079865	0.00955641	0.119	0.08	1	0
ENSMUSG00000036940	Kdm1a	0.0698229	0.0447934	-0.092008	0.00839626	0.257	0.313	1	0
ENSMUSG00000034021	Pds5b	0.0698655	0.00693466	-0.0858768	0.00962403	0.46	0.537	1	0
ENSMUSG00000056820	Tsnax	0.069917	0.000100079	-0.0751831	0.0102941	0.2675	0.332	1	0
ENSMUSG00000037519	Ppfia1	0.069939	0.0284731	-0.0429804	0.00440666	0.194	0.257	1	0	SFARI					2	0
ENSMUSG00000039031	Arhgap18	0.0699622	0.0584997	-0.0933214	0.0349796	0.306	0.369	1	0
ENSMUSG00000019891	Dcbld1	0.0702393	0.0356674	0.0423273	0.00491634	0.108	0.07	1	0
ENSMUSG00000043531	Sorcs1	0.0702763	0.0184016	-0.132366	0.00346987	0.7765	0.797	1	0	EAGLE		Limited	0.25	Discordant
ENSMUSG00000036825	Ssx2ip	0.070606	0.0761984	-0.0477393	0.0127043	0.064	0.104	1	0
ENSMUSG00000017969	Ptgis	0.0706656	0.0409384	0.0720753	0.0207353	0.2515	0.195	1	0
ENSMUSG00000019916	P4ha1	0.0707811	0.0611575	-0.0814651	0.0337825	0.366	0.449	1	0
ENSMUSG00000026554	Dcaf8	0.0709722	0.0790112	-0.0745007	0.0330171	0.1965	0.259	1	0
ENSMUSG00000030201	Lrp6	0.0709868	0.0782633	-0.079345	0.0371001	0.3545	0.43	1	0
ENSMUSG00000018363	Smurf2	0.0711771	0.0796049	-0.105104	0.0225454	0.3355	0.401	1	0
ENSMUSG00000024767	Otub1	0.0712217	0.0662863	0.0529438	0.0147138	0.11	0.07	1	0
ENSMUSG00000044533	Rps2	0.0712441	0.082462	0.103853	0.0391221	0.266	0.209	1	0
ENSMUSG00000020153	Ndufs7	0.0714228	0.0585472	0.0916656	0.0159936	0.163	0.118	1	0
ENSMUSG00000020076	Ddx50	0.0715167	0.0680899	-0.0884409	0.0416441	0.3715	0.444	1	0
ENSMUSG00000052798	Nup107	0.0715187	0.0770631	-0.0566241	0.0153024	0.067	0.107	1	0
ENSMUSG00000037999	Arap2	0.0716546	0.0330382	-0.0846124	0.0104416	0.245	0.305	1	0
ENSMUSG00000025217	Btrc	0.0717501	0.0840913	-0.106312	0.0418884	0.5055	0.588	1	0	SFARI					2	0
ENSMUSG00000034685	Fam171a2	0.0717652	0.0673182	0.0660426	0.0163975	0.1535	0.107	1	0
ENSMUSG00000087380	2210408F21Rik	0.0717732	0.0154355	-0.0432676	0.0124156	0.226	0.291	1	0
ENSMUSG00000042298	Ttc19	0.0718612	0.0160304	-0.0760222	0.00712142	0.3875	0.465	1	0
ENSMUSG00000028344	Invs	0.0718827	0.00840644	-0.0428088	0.0141688	0.131	0.182	1	0
ENSMUSG00000112404	Gm32442	0.071902	0.0118045	-0.0677446	0	0.0925	0.134	1	0
ENSMUSG00000097375	6720427I07Rik	0.0720333	0.0452527	-0.0718387	0.00946772	0.1365	0.184	1	0
ENSMUSG00000033960	Jcad	0.0720421	0.00873998	-0.0711154	0.00583494	0.3235	0.385	1	0
ENSMUSG00000027598	Itch	0.0721501	0.0771964	-0.090548	0.017742	0.313	0.377	1	0
ENSMUSG00000015087	Rabl6	0.0722209	0.0434369	-0.0691176	0.0142965	0.2675	0.334	1	0
ENSMUSG00000022551	Cyc1	0.0722922	0.00569788	0.0872552	0.00677836	0.174	0.128	1	0
ENSMUSG00000024211	Grm8	0.0724331	0.0477144	-0.215771	0.0352313	0.341	0.398	1	0
ENSMUSG00000032589	Bsn	0.0727274	0.0848956	0.117393	0.0447782	0.4905	0.428	1	0
ENSMUSG00000030213	Atf7ip	0.0727557	0.0881059	-0.0915089	0.0380693	0.3305	0.404	1	0
ENSMUSG00000023923	Tbc1d5	0.0728922	0.0746106	-0.103023	0.0353841	0.596	0.671	1	0	SFARI					2	0
ENSMUSG00000018171	Vmp1	0.0728958	0.0565152	-0.0853526	0.0286485	0.4345	0.513	1	0
ENSMUSG00000026159	Agfg1	0.072914	0.0476636	-0.0608233	0.00798548	0.2805	0.345	1	0
ENSMUSG00000028158	Mttp	0.0730149	0.0476553	-0.0666652	0.00964678	0.1125	0.158	1	0
ENSMUSG00000017778	Cox7c	0.073149	0.0837318	0.149114	0.0372938	0.3705	0.318	1	0
ENSMUSG00000022883	Robo1	0.0731733	0.060697	-0.126078	0.0236202	0.9865	0.973	1	0
ENSMUSG00000029916	Agk	0.0732115	0.0390239	-0.0731151	0.0202907	0.172	0.225	1	0
ENSMUSG00000027312	Atrn	0.0733543	0.096813	-0.0964828	0.0590481	0.36	0.439	1	0
ENSMUSG00000022974	Paxbp1	0.0733619	0.0462635	-0.0706616	0.0141198	0.3945	0.468	1	0
ENSMUSG00000027602	Map1lc3a	0.0733751	0.0678592	0.0747232	0.0215784	0.118	0.078	1	0
ENSMUSG00000032570	Atp2c1	0.0734832	0.00230678	-0.034704	0.0145945	0.5065	0.594	1	0
ENSMUSG00000048118	Arid4a	0.0736083	0.0786658	-0.0775697	0.0217269	0.301	0.369	1	0
ENSMUSG00000032076	Cadm1	0.0738009	0.0269189	0.198345	0.00850443	0.7645	0.746	1	0	SFARI					2	0
ENSMUSG00000042148	Cox10	0.0738636	0.0275091	-0.0479842	0.00492822	0.0935	0.136	1	0
ENSMUSG00000039318	Rab3gap2	0.073867	0.0597249	-0.0569262	0.0117259	0.298	0.372	1	0
ENSMUSG00000040446	Rprd1a	0.074031	0.0356855	-0.0868272	0.00383512	0.348	0.412	1	0
ENSMUSG00000039270	Megf9	0.0741668	0.0607242	-0.102237	0.0201129	0.198	0.251	1	0
ENSMUSG00000038126	Mphosph9	0.0741744	0.0313417	-0.0696638	0.00877545	0.215	0.273	1	0
ENSMUSG00000031465	Angpt2	0.07429	0.0273538	-0.0405526	0.00758471	0.067	0.104	1	0
ENSMUSG00000029569	Tmem168	0.0743776	0.0449369	-0.0510686	0.00760356	0.074	0.112	1	0
ENSMUSG00000059423	Zfp933	0.0743776	0.0449369	-0.0510686	0.00760356	0.074	0.112	1	0
ENSMUSG00000000439	Mkrn2	0.0744038	0.0919491	-0.0563789	0.020302	0.0695	0.112	1	0
ENSMUSG00000020532	Acaca	0.0745028	0.0464526	-0.0933392	0.0165208	0.25	0.307	1	0
ENSMUSG00000028639	Ybx1	0.0748281	0.00263563	-0.0638302	0.0200427	0.293	0.361	1	0
ENSMUSG00000030759	Far1	0.0750919	0.079857	-0.0853205	0.0264986	0.591	0.674	1	0
ENSMUSG00000047554	Tmem41b	0.0751556	0.0804806	-0.0598262	0.020302	0.0695	0.11	1	0
ENSMUSG00000025437	Usp33	0.0754522	0.0845981	0.100526	0.0211435	0.42	0.353	1	0
ENSMUSG00000002227	Mov10	0.0754764	0.0515838	-0.0549707	0.00495214	0.0935	0.136	1	0
ENSMUSG00000063145	Bbs5	0.0755034	0.00220253	-0.0698355	0.00235326	0.144	0.193	1	0
ENSMUSG00000058503	Fam133b	0.0755295	0.00377008	-0.0679083	0.00491634	0.107	0.15	1	0
ENSMUSG00000020463	Ppp4r3b	0.0757819	0.00873696	-0.0855084	0.00204232	0.282	0.337	1	0
ENSMUSG00000023021	Cers5	0.0759354	0.0395133	-0.0608699	0.00225445	0.1775	0.233	1	0
ENSMUSG00000024286	Ccny	0.0761043	0.0803089	-0.0800648	0.0432694	0.4105	0.487	1	0
ENSMUSG00000018548	Trim37	0.076521	0.0811461	-0.110956	0.0392769	0.365	0.43	1	0
ENSMUSG00000038274	Fau	0.0765392	0.0960971	0.103848	0.0387441	0.2155	0.16	1	0
ENSMUSG00000034032	Rpap1	0.0765719	0.0632118	-0.0479745	0.0127679	0.0645	0.102	1	0
ENSMUSG00000072769	Gm10419	0.0766983	0.00766265	-0.0707956	0.0113983	0.46	0.535	1	0
ENSMUSG00000035284	Vps13c	0.0770684	0.0472613	-0.0890708	0.00351167	0.4065	0.471	1	0
ENSMUSG00000021360	Gcnt2	0.0772615	0.103631	-0.13627	0.0346534	0.259	0.326	1	0
ENSMUSG00000021973	Micu2	0.0772846	0.0949792	-0.102362	0.0253607	0.166	0.222	1	0
ENSMUSG00000028521	Slc35d1	0.0773116	0.0373716	-0.0628235	0.00955641	0.124	0.171	1	0
ENSMUSG00000041815	Poldip3	0.0773192	0.0746404	-0.0563672	0.0172283	0.099	0.144	1	0
ENSMUSG00000040651	Tasor	0.0773925	0.0600845	-0.0916265	0.0231657	0.3995	0.468	1	0
ENSMUSG00000028580	Pum1	0.0776155	0.0180771	-0.0489539	0.01599	0.484	0.551	1	0
ENSMUSG00000030753	Thap12	0.0776537	0.0497946	-0.0600654	0.0102015	0.0655	0.102	1	0
ENSMUSG00000025340	Rabgef1	0.0777369	0.102502	-0.0571632	0.042253	0.083	0.131	1	0
ENSMUSG00000038372	Gmds	0.0780893	0.01944	-0.0923459	0.020878	0.313	0.374	1	0
ENSMUSG00000039001	Rps21	0.0781718	0.0244565	0.118175	0.00625215	0.231	0.184	1	0
ENSMUSG00000028447	Dctn3	0.0781944	0.0105924	0.085829	0.00231062	0.1485	0.107	1	0
ENSMUSG00000026361	Cdc73	0.0782205	0.0285543	-0.0668578	0.00403218	0.2925	0.353	1	0
ENSMUSG00000042182	Bend6	0.0782732	0.0120836	-0.0507448	0	0.103	0.147	1	0
ENSMUSG00000028496	Mllt3	0.078635	0.0010177	-0.113589	0.00105115	0.762	0.794	1	0
ENSMUSG00000020700	Map3k3	0.0786502	0.0607592	-0.0852101	0.0247963	0.3915	0.463	1	0
ENSMUSG00000027540	Ptpn1	0.0787665	0.0429112	-0.055913	0.0152425	0.2085	0.27	1	0
ENSMUSG00000028423	Nfx1	0.0787807	0.068694	-0.10324	0.0329946	0.414	0.481	1	0
ENSMUSG00000027499	Pkia	0.0791609	0.00713933	-0.0891278	0.00333379	0.4495	0.508	1	0
ENSMUSG00000021140	Pcnx	0.0792935	0.0446512	-0.0685764	0.0136934	0.425	0.495	1	0
ENSMUSG00000112586	Gm6729	0.0793708	0.00365811	-0.0424613	0.00243761	0.096	0.139	1	0
ENSMUSG00000029434	Vps33a	0.0794076	0.0086297	-0.0554728	0.00685427	0.167	0.219	1	0
ENSMUSG00000032657	Fam189b	0.0794084	0.0355131	-0.0514686	0.0112228	0.175	0.23	1	0
ENSMUSG00000043289	Mei4	0.0794484	0.049055	-0.118301	0.00817206	0.5375	0.604	1	0
ENSMUSG00000040785	Ttc3	0.0795971	0.0938467	0.0884291	0.0418225	0.952	0.947	1	0
ENSMUSG00000037353	Letmd1	0.0796325	0.0177241	-0.0487958	0.00501298	0.079	0.118	1	0
ENSMUSG00000024743	Syt7	0.0797446	0.00668956	-0.0624841	0	0.421	0.492	1	0
ENSMUSG00000015748	Prpf3	0.0799595	0.0798354	-0.0725348	0.0218922	0.21	0.27	1	0
ENSMUSG00000038084	Opa1	0.0800459	0.0582439	-0.0730206	0.0226707	0.35	0.417	1	0
ENSMUSG00000046096	Mosmo	0.0800646	0.0302778	-0.0550231	0.0072095	0.1205	0.166	1	0
ENSMUSG00000006288	Ttc5	0.0801024	0.0123373	-0.0647363	0	0.103	0.144	1	0
ENSMUSG00000045983	Eif4g1	0.080127	0.0935646	-0.0917537	0.0356417	0.2005	0.259	1	0	SFARI					3	0
ENSMUSG00000045210	Vcpip1	0.0801833	0.0222417	-0.0432714	0.00477818	0.1175	0.163	1	0
ENSMUSG00000066900	Suds3	0.080247	0.0390739	-0.0543238	0.00489276	0.108	0.152	1	0
ENSMUSG00000005575	Ube2m	0.0803214	0.0404161	0.0600432	0.00489276	0.106	0.07	1	0
ENSMUSG00000031311	Nono	0.0803457	0.00617198	-0.0641469	0.00976217	0.11	0.152	1	0
ENSMUSG00000050705	2310061I04Rik	0.0805657	0.0314812	-0.0439088	0.00252198	0.0725	0.11	1	0
ENSMUSG00000035126	Dnai4	0.080574	0.0133087	-0.0719339	0	0.2565	0.318	1	0
ENSMUSG00000063063	Ctnna2	0.0806618	0.0259294	-0.0677816	0.00930482	0.9855	0.997	1	0	SFARI						1
ENSMUSG00000068551	Zfp467	0.0806653	0.0170256	-0.0547824	0.00254717	0.071	0.107	1	0
ENSMUSG00000063550	Nup98	0.0806778	0.0819628	-0.0704893	0.0304008	0.381	0.468	1	0
ENSMUSG00000041650	Pcca	0.0807341	0.0429611	-0.0990189	0.0114409	0.345	0.401	1	0	SFARI						1
ENSMUSG00000039697	Ncoa7	0.0808257	0.0687669	-0.0925052	0.00692797	0.4385	0.505	1	0
ENSMUSG00000041258	Zfp236	0.0808634	0.0713561	-0.0936877	0.0160972	0.3045	0.364	1	0
ENSMUSG00000042444	Mindy2	0.0809399	0.0827206	-0.063897	0.0194318	0.1135	0.16	1	0
ENSMUSG00000031295	Phka2	0.0811025	0.0466711	-0.062145	0.0240558	0.197	0.251	1	0
ENSMUSG00000032020	Ubash3b	0.0811631	0.0142419	-0.103659	0.0046056	0.1375	0.184	1	0
ENSMUSG00000022674	Ube2v2	0.0812117	0.0857752	-0.0801415	0.0186332	0.162	0.214	1	0
ENSMUSG00000030222	Rerg	0.081339	0.0531027	-0.0792736	0.0164542	0.2525	0.31	1	0
ENSMUSG00000018451	6330403K07Rik	0.0813403	0.0597324	0.0606226	0.0186758	0.151	0.107	1	0
ENSMUSG00000033720	Sfxn5	0.0813746	0.0628376	-0.0710879	0.0189115	0.241	0.305	1	0
ENSMUSG00000002102	Psmc3	0.0813794	0.0519367	0.0645638	0.00686965	0.175	0.128	1	0
ENSMUSG00000020576	Nbas	0.0814274	0.0585928	-0.0922536	0.0163226	0.262	0.324	1	0
ENSMUSG00000020137	Thap2	0.0817393	0.0148544	-0.0798808	0	0.0765	0.112	1	0
ENSMUSG00000053025	Sv2b	0.0817585	0.0850077	0.108893	0.0221092	0.484	0.43	1	0
ENSMUSG00000006526	Stimate	0.0818497	0.0888561	-0.0702913	0.0193857	0.1175	0.166	1	0
ENSMUSG00000020671	Rab10	0.081937	0.0570508	-0.0929652	0.0141829	0.289	0.348	1	0
ENSMUSG00000033721	Vav3	0.0819389	0.0178142	-0.094308	0.00225945	0.1735	0.222	1	0
ENSMUSG00000019775	Rgs17	0.0821555	0.0216317	-0.108611	0.0120372	0.521	0.575	1	0
ENSMUSG00000042564	Fam227a	0.0821853	0.0195902	-0.0402799	0.00962403	0.1095	0.155	1	0
ENSMUSG00000045038	Prkce	0.0822551	0.0702224	-0.0809598	0.0255048	0.889	0.936	1	0
ENSMUSG00000019978	Epb41l2	0.0823488	0.0427678	-0.0595851	0.00955641	0.127	0.174	1	0
ENSMUSG00000022564	Grina	0.0824141	0.0275552	0.12984	0.0251072	0.436	0.388	1	0
ENSMUSG00000030471	Zdhhc13	0.0824836	0.0653488	-0.0763168	0.0138483	0.16	0.211	1	0
ENSMUSG00000040537	Adam22	0.0826753	0.0492729	-0.055422	0.00337609	0.718	0.818	1	0
ENSMUSG00000042447	Mios	0.0827561	0.0581644	-0.0541469	0.00709254	0.127	0.176	1	0
ENSMUSG00000000420	Galnt1	0.0828241	0.0296289	-0.0683407	0.00942399	0.1445	0.193	1	0
ENSMUSG00000090841	Myl6	0.0830549	0.040046	0.0772831	0.0170382	0.234	0.184	1	0
ENSMUSG00000057113	Npm1	0.0830639	0.0153976	-0.0427634	0.00245521	0.0925	0.134	1	0
ENSMUSG00000033793	Atp6v1h	0.0831648	0.00940577	-0.0938419	0.0127519	0.4775	0.54	1	0
ENSMUSG00000032582	Rbm6	0.083169	0.0996642	-0.0978269	0.0395871	0.683	0.751	1	0
ENSMUSG00000023571	C1qtnf12	0.0832573	0.0379149	0.0529509	0.015609	0.194	0.144	1	0
ENSMUSG00000035674	Ndufa3	0.0833513	0.112302	0.0967025	0.0411771	0.159	0.107	1	0
ENSMUSG00000095098	Ccdc85b	0.083442	0.091915	0.0598346	0.0195248	0.1125	0.072	1	0
ENSMUSG00000020564	Atxn7l1	0.083478	0.0247569	-0.0781563	0.00405623	0.285	0.345	1	0
ENSMUSG00000022105	Rb1	0.0837337	0.0110416	-0.080542	0.0102734	0.254	0.313	1	0
ENSMUSG00000060534	Dcc	0.0837835	0.0289505	-0.0591919	0.0102656	1	1	1	0	SFARI					2	0
ENSMUSG00000086363	A330102I10Rik	0.0839348	0.0779099	-0.0804013	0.0330171	0.1995	0.254	1	0
ENSMUSG00000003346	Abhd17a	0.0840704	0.110628	0.120564	0.0388261	0.21	0.155	1	0
ENSMUSG00000052738	Suclg1	0.0840793	0.0349668	0.064788	0.0128053	0.231	0.179	1	0
ENSMUSG00000041992	Rapgef5	0.0843407	0.0944365	-0.0733517	0.0340412	0.278	0.34	1	0
ENSMUSG00000041765	Ubac2	0.084649	0.0658035	-0.0895485	0.0149866	0.242	0.297	1	0
ENSMUSG00000036959	Bcorl1	0.0846992	0.0135978	-0.0447116	0	0.095	0.136	1	0	SFARI						1
ENSMUSG00000021302	Ggps1	0.084771	0.0997356	-0.0654904	0.0299724	0.1575	0.214	1	0
ENSMUSG00000050088	1600012H06Rik	0.0848339	0.0530234	-0.0476048	0.00760356	0.068	0.104	1	0
ENSMUSG00000052949	Rnf157	0.0850023	0.0156177	-0.0759987	0.0169674	0.233	0.289	1	0
ENSMUSG00000030516	Tjp1	0.0850122	0.0424704	-0.0786961	0.0172544	0.7205	0.786	1	0
ENSMUSG00000003316	Glg1	0.0850158	0.000690955	-0.0812883	0.00499661	0.46	0.524	1	0
ENSMUSG00000046111	Cep295	0.0850491	0.110873	-0.0756415	0.0468343	0.1885	0.251	1	0
ENSMUSG00000030868	Dctn5	0.0851759	0.0466569	-0.0514859	0.00988036	0.098	0.139	1	0
ENSMUSG00000024787	Snx15	0.0854051	0.0475478	-0.0481112	0.00988036	0.092	0.134	1	0
ENSMUSG00000039717	Ralyl	0.0855538	0.0115696	-0.191446	0.00407784	0.456	0.492	1	0
ENSMUSG00000024511	Rab27b	0.0855992	0.113666	-0.098488	0.0619752	0.194	0.259	1	0
ENSMUSG00000053768	Chchd3	0.0857628	0.0756207	-0.0910499	0.0244566	0.4305	0.495	1	0
ENSMUSG00000027030	Stk39	0.085785	0.0647334	-0.0936359	0.0131149	0.337	0.406	1	0	SFARI					2	0
ENSMUSG00000028152	Tspan5	0.0858003	0.0822738	-0.0839482	0.0181941	0.588	0.679	1	0
ENSMUSG00000025370	Cdh9	0.0858076	0.0574922	-0.0898762	0.017476	0.607	0.698	1	0	SFARI					2	0
ENSMUSG00000035047	Kri1	0.0859057	0.0851485	-0.055166	0.0198574	0.091	0.134	1	0
ENSMUSG00000039913	Pak5	0.085913	0.0460458	-0.0760874	0.0367185	0.381	0.452	1	0
ENSMUSG00000035268	Pkig	0.0860377	0.0724554	-0.0370563	0.0189271	0.318	0.393	1	0
ENSMUSG00000050549	Fam241a	0.0860481	0.0753698	-0.055166	0.0198574	0.0895	0.131	1	0
ENSMUSG00000097039	Pvt1	0.0862936	0.079617	-0.0766684	0.0164875	0.258	0.321	1	0
ENSMUSG00000003200	Sh3gl1	0.0863164	0.0990304	-0.049082	0.0315407	0.1045	0.152	1	0
ENSMUSG00000037259	Dzank1	0.086401	0.00194046	-0.0826178	0.00572577	0.34	0.396	1	0
ENSMUSG00000046034	Otulin	0.0865747	0.0896427	-0.0553684	0.0187617	0.147	0.201	1	0
ENSMUSG00000085241	Snhg3	0.0870177	0.0518701	-0.0546575	0.0076225	0.071	0.107	1	0
ENSMUSG00000026526	Fh1	0.0871704	0.0178335	-0.0510597	0.00253451	0.0735	0.11	1	0
ENSMUSG00000025184	R3hcc1l	0.0871805	0.0495697	-0.058643	0.00940227	0.1365	0.184	1	0
ENSMUSG00000097497	Gm26652	0.0874835	0.0302453	-0.0680498	0.0072095	0.1205	0.163	1	0
ENSMUSG00000021290	Atp5mpl	0.0874962	0.0478573	0.0630822	0.00919051	0.171	0.126	1	0
ENSMUSG00000065954	Tacc1	0.0875295	0.0799307	-0.0470282	0.00965439	0.453	0.543	1	0
ENSMUSG00000034235	Usp54	0.0876472	0.0320979	-0.0541194	0.00251576	0.0805	0.118	1	0
ENSMUSG00000035376	Hacd2	0.0876674	0.103323	-0.0632406	0.0288059	0.119	0.168	1	0
ENSMUSG00000031865	Dctn1	0.0876676	0.0727071	0.140833	0.0225277	0.456	0.414	1	0
ENSMUSG00000042520	Ubap2l	0.0878433	0.076597	-0.054431	0.0204375	0.402	0.484	1	0
ENSMUSG00000023170	Gps2	0.0879729	0.0930328	-0.052553	0.0222261	0.1815	0.241	1	0
ENSMUSG00000042472	Zfp410	0.088057	0.102353	-0.0703923	0.0223669	0.0885	0.131	1	0
ENSMUSG00000039191	Rbpj	0.0881174	0.0956358	-0.0530473	0.0238361	0.1255	0.176	1	0
ENSMUSG00000001445	Mrpl10	0.0881209	0.0128965	-0.0423359	0.00506274	0.071	0.107	1	0
ENSMUSG00000018326	Ywhab	0.0881793	0.115055	0.125015	0.047076	0.266	0.211	1	0
ENSMUSG00000000794	Kcnn3	0.0883403	0.0939187	-0.0748819	0.0224627	0.3195	0.39	1	0
ENSMUSG00000037669	Ldah	0.0883631	0.0321556	-0.0559538	0.00948974	0.1285	0.174	1	0
ENSMUSG00000019790	Stxbp5	0.0883893	0.107103	-0.0690535	0.0332519	0.5265	0.612	1	0	SFARI					2	0
ENSMUSG00000092399	4930556N13Rik	0.0886788	0.0352808	-0.0674458	0.00751026	0.083	0.12	1	0
ENSMUSG00000003363	Pld3	0.088683	0.00869969	0.105579	0	0.413	0.358	1	0
ENSMUSG00000048251	Bcl11b	0.0886972	0.00831626	-0.100834	0.00619072	0.817	0.877	1	0
ENSMUSG00000004317	Clcn5	0.0887634	0.0156186	-0.0453778	0.00241453	0.1005	0.142	1	0
ENSMUSG00000058979	Hdhd5	0.0887698	0.0654183	-0.0629054	0.0101005	0.0775	0.115	1	0
ENSMUSG00000056211	R3hdm1	0.088822	0.0380327	-0.054718	0.0240807	0.9735	0.981	1	0
ENSMUSG00000023473	Celsr3	0.0889014	0.0427574	0.0814741	0.017937	0.186	0.142	1	0
ENSMUSG00000039449	Prpf18	0.0891627	0.00221217	-0.06428	0.00885159	0.194	0.249	1	0
ENSMUSG00000034453	Polr3b	0.0892729	0.0343971	-0.0523449	0.00502533	0.0805	0.118	1	0
ENSMUSG00000040414	Slc25a28	0.0893738	0.0581395	-0.0460295	0.00734797	0.099	0.142	1	0
ENSMUSG00000020612	Prkar1a	0.0896751	0.0070163	0.104716	0.00732599	0.382	0.337	1	0
ENSMUSG00000059263	Usp47	0.0898323	0.0902677	-0.0613008	0.0281159	0.262	0.329	1	0
ENSMUSG00000032652	Crebl2	0.0898815	0.105666	-0.0515268	0.0229828	0.0655	0.104	1	0
ENSMUSG00000110710	C78859	0.0901568	0.0412079	0.119765	0.00302862	0.766	0.77	1	0
ENSMUSG00000091264	Smim13	0.0902549	0.00986586	-0.0331063	0.00946772	0.1215	0.168	1	0
ENSMUSG00000021518	Ptdss1	0.0903008	0.0320556	-0.0548401	0.00494015	0.0965	0.136	1	0	SFARI					3	0
ENSMUSG00000029469	Ift81	0.0903484	0.0461543	-0.0443677	0.0117937	0.127	0.174	1	0
ENSMUSG00000038506	Dcun1d2	0.0904256	0.075467	-0.0809057	0.0207493	0.171	0.219	1	0
ENSMUSG00000056763	Cspp1	0.0904271	0.0364609	-0.105595	0.0165391	0.532	0.583	1	0
ENSMUSG00000032612	Usp4	0.0905505	0.0886825	-0.0834026	0.0326934	0.337	0.398	1	0
ENSMUSG00000024008	Cpne5	0.0906265	0.0199247	-0.0628526	0.0204913	0.545	0.618	1	0
ENSMUSG00000038533	Cbfa2t2	0.0907925	0.0625002	-0.0654645	0.0140989	0.281	0.34	1	0
ENSMUSG00000026571	Dcaf6	0.0908695	0.0418245	-0.0606633	0.0145945	0.5295	0.615	1	0
ENSMUSG00000041936	Agrn	0.0909482	0.0387195	0.133041	0.0183483	0.349	0.307	1	0
ENSMUSG00000033972	Zfp944	0.0909927	0.0474077	-0.0463582	0.00740129	0.098	0.139	1	0
ENSMUSG00000091475	Cerox1	0.0911183	0.0454617	0.0476436	0.00736566	0.108	0.072	1	0
ENSMUSG00000021048	Mthfd1	0.091181	0.000256708	-0.0574369	0.0022396	0.19	0.243	1	0
ENSMUSG00000024188	Luc7l	0.0912175	0.00566116	-0.0746265	0.00221049	0.21	0.262	1	0
ENSMUSG00000040550	Otud6b	0.0912717	0.0129427	-0.0639806	0	0.1135	0.155	1	0
ENSMUSG00000059288	Cdyl	0.0913246	0.0366065	-0.0719861	0	0.135	0.179	1	0
ENSMUSG00000015659	Serac1	0.0913956	0.0501753	-0.0327016	0.00738343	0.084	0.123	1	0
ENSMUSG00000024176	Sox8	0.0914212	0.0898881	-0.0578281	0.0214273	0.1325	0.182	1	0
ENSMUSG00000032405	Pias1	0.0915485	0.0222225	-0.0699343	0	0.4505	0.513	1	0
ENSMUSG00000014498	Ankrd52	0.0915556	0.0183231	-0.0683912	0.00495214	0.0975	0.136	1	0
ENSMUSG00000038902	Pogz	0.0915853	0.0256453	-0.084932	0.0020969	0.253	0.31	1	0	SFARI;EAGLE;TADA	0	Definitive	35.4	Concordant	1	1
ENSMUSG00000056260	Lrif1	0.0917248	0.000248405	-0.0584225	0.0133064	0.1915	0.243	1	0
ENSMUSG00000002006	Pdzd4	0.0917431	0.0117784	-0.0898378	0.0106265	0.4025	0.46	1	0
ENSMUSG00000018411	Mapt	0.0921572	0.0723561	-0.0966767	0.0153638	0.496	0.556	1	0	SFARI					3	0
ENSMUSG00000071324	Armc2	0.0921781	0.0148575	-0.0439088	0.00252198	0.0735	0.11	1	0
ENSMUSG00000084771	A230072E10Rik	0.0922253	0.0741512	-0.0471875	0.0175674	0.0695	0.107	1	0
ENSMUSG00000024182	Axin1	0.0922514	0.0401445	-0.0612606	0.00239189	0.127	0.171	1	0
ENSMUSG00000038538	Ubn2	0.0922829	0.0204325	-0.0859843	0.0120443	0.675	0.759	1	0	SFARI					2	0
ENSMUSG00000038299	Wdr36	0.0922974	0.0578379	-0.0581725	0.0119877	0.1285	0.174	1	0
ENSMUSG00000022174	Dad1	0.0925662	0.00410258	0.0665213	0.00437829	0.214	0.166	1	0
ENSMUSG00000060679	Mrps9	0.0925994	0.109187	-0.0795488	0.0356508	0.262	0.324	1	0
ENSMUSG00000012114	Med15	0.0927644	0.11839	-0.0756168	0.0335235	0.203	0.265	1	0
ENSMUSG00000029436	Mmp17	0.0928707	0.0259766	0.0862317	0.0078928	0.31	0.259	1	0
ENSMUSG00000022779	Top3b	0.0929896	0.124212	-0.0816988	0.0345843	0.099	0.147	1	0	SFARI					2	0
ENSMUSG00000025920	Stau2	0.0930928	0.037741	-0.0856529	0.0317991	0.622	0.682	1	0
ENSMUSG00000034525	Ice1	0.0931391	0.0543019	-0.0555062	0.00800113	0.281	0.342	1	0
ENSMUSG00000002985	Apoe	0.0932184	0.0495208	0.0664803	0.0212291	0.127	0.088	1	0
ENSMUSG00000027273	Snap25	0.0933084	0.069164	-0.100603	0.0228089	0.7725	0.84	1	0	SFARI					2	0
ENSMUSG00000021188	Trip11	0.093334	0.0385266	-0.0713101	0.017218	0.2275	0.281	1	0
ENSMUSG00000031644	Nek1	0.0934057	0.0755183	-0.0837737	0.0179853	0.2875	0.345	1	0
ENSMUSG00000060147	Serpinb6a	0.0934087	0.0268675	-0.0677301	0.00239189	0.1255	0.168	1	0
ENSMUSG00000027522	Stx16	0.0935602	0.00568045	-0.0497279	0.0021682	0.201	0.259	1	0
ENSMUSG00000020368	Canx	0.093953	0.0647825	0.088303	0.0117259	0.3225	0.267	1	0
ENSMUSG00000066151	Fkbp15	0.094038	0.0213057	-0.0533198	0.00480067	0.115	0.158	1	0
ENSMUSG00000037646	Vps13b	0.0940788	0.0269781	-0.0755525	0.00286154	0.7995	0.856	1	0	SFARI;EAGLE		Moderate	6.35	Discordant	1	1
ENSMUSG00000034163	Zfc3h1	0.0940999	0.124913	-0.0805017	0.043727	0.3665	0.452	1	0
ENSMUSG00000017210	Med24	0.0941256	0.0422736	-0.0530605	0.00694763	0.156	0.206	1	0
ENSMUSG00000021754	Map3k1	0.094145	0.000167753	-0.0528404	0.00245521	0.099	0.139	1	0
ENSMUSG00000043909	Trp53bp1	0.094228	0.00320778	-0.0500118	0	0.378	0.455	1	0
ENSMUSG00000027742	Cog6	0.0942819	0.0583858	-0.0584257	0.00722652	0.115	0.158	1	0
ENSMUSG00000067567	Hdac8	0.0942956	0.0858854	-0.0949112	0.0313914	0.3555	0.42	1	0	SFARI						1
ENSMUSG00000004698	Hdac9	0.0943078	0.105956	-0.0967116	0.0282518	0.4225	0.487	1	0
ENSMUSG00000022471	Xrcc6	0.0944972	0.0288036	0.0815369	0.0242116	0.1955	0.15	1	0	SFARI					3	0
ENSMUSG00000015165	Hnrnpl	0.0947414	0.00246464	-0.0561706	0.00987558	0.317	0.377	1	0
ENSMUSG00000036644	Tbc1d9b	0.09479	0.0981806	-0.0751499	0.0266244	0.1135	0.158	1	0
ENSMUSG00000025137	Pcyt2	0.094822	0.0410591	-0.0594361	0.0135419	0.18	0.233	1	0
ENSMUSG00000052512	Nav2	0.094844	0.0885336	-0.0889556	0.0130724	0.707	0.735	1	0	SFARI					2	0
ENSMUSG00000035045	Zc3h12b	0.0948702	0.0534366	-0.0716463	0.016987	0.322	0.382	1	0
ENSMUSG00000040225	Prrc2c	0.0948987	0.0784188	-0.0712986	0.0240377	0.5695	0.631	1	0
ENSMUSG00000003814	Calr	0.0949033	0.0977274	0.124209	0.0262069	0.3275	0.281	1	0
ENSMUSG00000037579	Kcnh3	0.0950253	0.0483372	-0.0543993	0.00635603	0.242	0.302	1	0
ENSMUSG00000030122	Ptms	0.0951787	0.0535768	0.104421	0.0175722	0.2995	0.251	1	0
ENSMUSG00000041439	Mfsd6	0.0952127	0.071013	-0.0507148	0.0125789	0.0775	0.115	1	0
ENSMUSG00000044216	Kcnj4	0.0957273	0.103387	0.088261	0.0303248	0.2275	0.176	1	0
ENSMUSG00000061028	Clasrp	0.0957692	0.0301374	-0.0497891	0.00693189	0.1525	0.198	1	0
ENSMUSG00000040276	Pacsin1	0.0957703	0.0324237	0.106516	0.0146593	0.615	0.604	1	0
ENSMUSG00000025151	Maged1	0.096011	0.0971811	0.10654	0.00675592	0.441	0.388	1	0
ENSMUSG00000069237	Fam8a1	0.0960705	0.0526548	-0.0548528	0.00988036	0.09	0.128	1	0
ENSMUSG00000004530	Coro1c	0.0960953	0.063983	-0.05661	0.0123655	0.099	0.139	1	0
ENSMUSG00000038005	Hpf1	0.0960989	0.0302421	-0.0391101	0.00243761	0.107	0.15	1	0
ENSMUSG00000033382	Trappc8	0.0961002	0.0366578	-0.0511935	0.0139338	0.2885	0.356	1	0
ENSMUSG00000032849	Abcc4	0.0961493	0.0473163	-0.0592485	0.00733037	0.108	0.15	1	0
ENSMUSG00000006373	Pgrmc1	0.0964746	0.0168902	0.0760689	0.00668946	0.2045	0.16	1	0
ENSMUSG00000059142	Zfp945	0.0965496	0.130135	-0.0659887	0.0380516	0.1285	0.184	1	0
ENSMUSG00000073678	Pgap1	0.0970275	0.00796694	-0.0376251	0	0.2475	0.313	1	0
ENSMUSG00000024524	Gnal	0.0973516	0.113846	-0.0678518	0.0336761	0.8795	0.955	1	0
ENSMUSG00000032489	Kif9	0.0973712	0.0547797	-0.056745	0.0123955	0.092	0.131	1	0
ENSMUSG00000075595	Zfp652	0.0973816	0.0841753	-0.0908366	0.0248322	0.274	0.329	1	0
ENSMUSG00000010392	Gosr1	0.0974388	0	-0.0412227	0	0.096	0.136	1	0
ENSMUSG00000025558	Dock9	0.0975573	0.0967614	-0.0818737	0.0274494	0.1685	0.219	1	0
ENSMUSG00000005981	Trap1	0.0975933	0.0342323	-0.0669555	0.00248512	0.0935	0.131	1	0
ENSMUSG00000034761	Map4k5	0.0976738	0.0740085	-0.0347277	0.0228826	0.309	0.38	1	0
ENSMUSG00000018068	Ints2	0.097679	0.111493	-0.0482401	0.0230811	0.1495	0.203	1	0
ENSMUSG00000001054	Rmnd5b	0.0977568	0.10949	-0.0658789	0.0285372	0.143	0.193	1	0
ENSMUSG00000036561	Ppp6r2	0.0978904	0.00803973	-0.0599431	0.00176648	0.3995	0.471	1	0
ENSMUSG00000049336	Tenm2	0.0980649	0.101772	0.15734	0.0329184	0.939	0.933	1	0
ENSMUSG00000027618	Nfs1	0.0981306	0.111973	-0.0556682	0.0433197	0.1655	0.219	1	0
ENSMUSG00000025868	Higd2a	0.0983215	0.0323454	0.0558294	0.0117394	0.1415	0.102	1	0
ENSMUSG00000035941	Ibtk	0.09847	0.057809	-0.0649538	0.00722652	0.1205	0.163	1	0
ENSMUSG00000087687	Pet100	0.0985089	0.0529074	-0.0466917	0.00745538	0.087	0.126	1	0
ENSMUSG00000069631	Strada	0.0985262	0.0322522	-0.0468081	0.00896832	0.1685	0.219	1	0
ENSMUSG00000042606	Hirip3	0.0990663	0.038032	-0.0537379	0.00749188	0.0885	0.126	1	0
ENSMUSG00000025782	Taf3	0.0990897	0.0503623	-0.0600587	0.00456439	0.1655	0.214	1	0
ENSMUSG00000051864	Tbc1d22a	0.0993006	0.127407	-0.0605198	0.0386829	0.1135	0.163	1	0
ENSMUSG00000102784	Gm38251	0.0994081	0.0114242	0.0723593	0.00232114	0.1455	0.107	1	0
ENSMUSG00000032549	Rab6b	0.0996639	0.0152627	0.118821	0.00948974	0.48	0.42	1	0
ENSMUSG00000026322	Htr4	0.0998014	0.0843128	-0.0868873	0.0262507	0.0845	0.123	1	0
ENSMUSG00000032777	Gtf3c1	0.0999686	0.0300583	-0.0781509	0.00391609	0.3155	0.377	1	0
ENSMUSG00000111752	Gm38575	0.0999715	0.0212025	-0.0416234	0.0049763	0.079	0.115	1	0
ENSMUSG00000114407	Gm48765	0.100029	0.0372214	-0.0736891	0.011876	0.1365	0.179	1	0
ENSMUSG00000028613	Lrp8	0.10009	0.11626	-0.0728264	0.0201019	0.083	0.123	1	0
ENSMUSG00000052698	Tln2	0.10017	0.0194101	-0.0418908	0.00858467	0.5335	0.628	1	0
ENSMUSG00000004961	Syt5	0.10022	0.0559757	0.0892645	0.00408056	0.273	0.225	1	0
ENSMUSG00000028854	Slc9a1	0.100432	0.046381	-0.0861906	0.0242116	0.205	0.251	1	0
ENSMUSG00000061778	Mospd2	0.100461	0.0965483	-0.0497153	0.0161381	0.155	0.206	1	0
ENSMUSG00000000708	Kat2b	0.100523	0.0753961	-0.0368193	0.012548	0.075	0.112	1	0	SFARI					2	0
ENSMUSG00000050567	Maml1	0.10055	0.068331	-0.0656843	0.0100014	0.091	0.128	1	0
ENSMUSG00000026933	Camsap1	0.100571	0.0863655	0.0884059	0.0234975	0.3195	0.267	1	0
ENSMUSG00000048355	Arxes1	0.100596	0.0639032	0.0717467	0.00724362	0.1095	0.075	1	0
ENSMUSG00000039153	Runx2	0.100645	0.108907	-0.0540552	0.0305947	0.123	0.171	1	0
ENSMUSG00000057506	Bloc1s2	0.100748	0.0152645	-0.043696	0.00250957	0.079	0.115	1	0
ENSMUSG00000053253	Ndfip2	0.100771	0.0923681	-0.0609757	0.0366939	0.4535	0.527	1	0
ENSMUSG00000116894	4930547E14Rik	0.100915	0.0326142	-0.0409303	0	0.0965	0.136	1	0
ENSMUSG00000006276	Eps15l1	0.101032	0.0568918	-0.0809227	0.00392362	0.3305	0.388	1	0
ENSMUSG00000031728	Zfp821	0.101098	0.127037	-0.0648878	0.0295713	0.099	0.144	1	0
ENSMUSG00000039159	Ube2h	0.101262	0.0190419	-0.0805818	0.0121206	0.27	0.321	1	0	SFARI					2	0
ENSMUSG00000029563	Foxp2	0.101269	0.0584238	-0.101085	0.0416441	0.8515	0.898	1	0	SFARI					1	0
ENSMUSG00000033499	Larp4b	0.101271	0.0767586	-0.0564885	0.00775775	0.31	0.377	1	0
ENSMUSG00000025178	Pi4k2a	0.10138	0.0577062	-0.0487046	0.00933773	0.1415	0.19	1	0
ENSMUSG00000022802	Lmln	0.10149	0.00203336	-0.0405438	0.00252823	0.072	0.107	1	0
ENSMUSG00000052544	St6galnac3	0.101579	0.0141219	-0.0451876	0.0129749	0.4075	0.471	1	0
ENSMUSG00000014956	Ppp1cb	0.101657	0.01698	-0.0741495	0.00943706	0.342	0.398	1	0
ENSMUSG00000028982	Slc25a33	0.101726	0.0338832	-0.0509881	0.00489276	0.107	0.147	1	0
ENSMUSG00000045053	Kcng3	0.101761	0.100113	-0.0457616	0.0315407	0.088	0.128	1	0
ENSMUSG00000062797	Hikeshi	0.101805	0.0903337	-0.0371605	0.0145046	0.11	0.155	1	0
ENSMUSG00000034931	Dhx8	0.102006	0.0389825	-0.0561748	0.00506274	0.0775	0.112	1	0
ENSMUSG00000042138	Msantd2	0.102059	0.111076	-0.0449736	0.0262507	0.123	0.171	1	0	SFARI					2	0
ENSMUSG00000028456	Unc13b	0.102144	0.00236518	-0.0486829	0.00241453	0.107	0.147	1	0
ENSMUSG00000045994	B3gat1	0.102256	0.00620216	-0.0473732	0.00756596	0.075	0.11	1	0
ENSMUSG00000053395	Cacng8	0.102299	0.0742668	-0.0425176	0.0140711	0.135	0.182	1	0
ENSMUSG00000031302	Nlgn3	0.102551	0.00193338	-0.0720191	0.00254717	0.07	0.102	1	0	SFARI;EAGLE		Moderate	6.5	Discordant	1	0
ENSMUSG00000019785	Clvs2	0.102594	0.0172787	-0.0600696	0.00912883	0.1725	0.219	1	0
ENSMUSG00000010110	Stx5a	0.102748	0.0407029	-0.0520097	0.0022695	0.1685	0.219	1	0
ENSMUSG00000050244	Heatr1	0.102993	0.0107426	-0.0547857	0.0119596	0.128	0.171	1	0
ENSMUSG00000031583	Wrn	0.103058	0.0115104	-0.0475135	0	0.159	0.209	1	0
ENSMUSG00000026134	Prim2	0.103063	0.0434595	-0.0559159	0.0100755	0.075	0.11	1	0
ENSMUSG00000029576	Radil	0.103113	0.0704689	-0.0476269	0.0128321	0.222	0.281	1	0
ENSMUSG00000012117	Dhdds	0.103162	0.0970177	-0.0764118	0.0212291	0.143	0.19	1	0
ENSMUSG00000019894	Slc6a15	0.10322	0.0962379	0.0836855	0.0164353	0.135	0.096	1	0
ENSMUSG00000048911	Rnf24	0.103315	0.0954369	-0.0443557	0.0195716	0.102	0.144	1	0
ENSMUSG00000023066	Rttn	0.103379	0.00885708	-0.0403923	0.0115795	0.1455	0.193	1	0
ENSMUSG00000028047	Thbs3	0.103396	0.0839488	0.0807503	0.0249657	0.163	0.12	1	0
ENSMUSG00000058291	Zfp68	0.103533	0.103813	-0.0475064	0.0126413	0.075	0.112	1	0
ENSMUSG00000026839	Upp2	0.103703	0.013213	-0.0740028	0.00357944	0.377	0.439	1	0
ENSMUSG00000035133	Arhgap5	0.103704	0.062229	-0.055144	0.00378531	0.3235	0.388	1	0	SFARI					2	0
ENSMUSG00000039059	Hrh3	0.104005	0.0236224	0.0727348	0.0111492	0.1855	0.142	1	0
ENSMUSG00000001415	Smg5	0.104029	0.0712171	-0.116506	0.0145997	0.3795	0.428	1	0
ENSMUSG00000097391	Mirg	0.104039	0.123536	0.154368	0.0378085	0.662	0.644	1	0
ENSMUSG00000038740	Mvb12b	0.104119	0.0813596	-0.0751229	0.0111249	0.1965	0.246	1	0
ENSMUSG00000032547	Ryk	0.104171	0.120979	-0.0752536	0.0272659	0.178	0.233	1	0
ENSMUSG00000031605	Klhl2	0.104415	0.0321495	-0.0812898	0.00407784	0.551	0.623	1	0
ENSMUSG00000019947	Arid5b	0.104687	0.00887219	-0.067567	0.00465818	0.1485	0.193	1	0
ENSMUSG00000057522	Spop	0.104772	0.00507807	-0.0781482	0	0.3225	0.374	1	0
ENSMUSG00000006273	Atp6v1b2	0.104814	0.0296898	-0.0557113	0.0191043	0.3085	0.374	1	0
ENSMUSG00000056608	Chd9	0.104829	0.0596733	-0.0872572	0.0196565	0.627	0.674	1	0	SFARI					3	0
ENSMUSG00000025583	Rptor	0.104949	0.145095	-0.0657595	0.0533796	0.277	0.361	1	0
ENSMUSG00000001521	Tulp3	0.105096	0.0113596	0.0700784	0	0.1995	0.155	1	0
ENSMUSG00000029999	Tgfa	0.105099	0.0287624	0.110667	0.00886313	0.3955	0.356	1	0
ENSMUSG00000030007	Cct7	0.105156	0.0956881	0.067016	0.0112973	0.1765	0.131	1	0
ENSMUSG00000020680	Taf15	0.105204	0.0918513	-0.0525293	0.018892	0.336	0.406	1	0
ENSMUSG00000029291	Rufy3	0.105391	0.0817846	-0.090682	0.0171194	0.5175	0.567	1	0
ENSMUSG00000048490	Nrip1	0.105437	0.00294084	-0.0520222	0	0.201	0.251	1	0
ENSMUSG00000048602	Morc2b	0.105582	0.0259988	-0.0401744	0.00480067	0.115	0.158	1	0
ENSMUSG00000001847	Rac1	0.105767	0.00271893	-0.0640583	0.00237518	0.136	0.179	1	0	SFARI						1
ENSMUSG00000104597	B230334C09Rik	0.105878	0.054583	-0.0715394	0.0123016	0.4105	0.473	1	0
ENSMUSG00000032336	Nptn	0.105985	0.0883047	-0.0615983	0.0266469	0.952	0.981	1	0
ENSMUSG00000037400	Atp11b	0.105992	0.113826	-0.0816102	0.0381217	0.2765	0.329	1	0
ENSMUSG00000020435	Osbp2	0.105998	0.0252144	-0.0462538	0.00627008	0.6285	0.706	1	0
ENSMUSG00000044340	Phlpp1	0.106005	0.0538542	-0.112594	0.0179923	0.381	0.43	1	0
ENSMUSG00000043467	Zbtb37	0.106196	0.112936	-0.0500473	0.0223126	0.0925	0.134	1	0
ENSMUSG00000044894	Uqcrq	0.106254	0.038685	0.0832633	0.0064771	0.221	0.176	1	0
ENSMUSG00000037172	Dennd11	0.106416	0.0123631	-0.0453919	0	0.151	0.198	1	0
ENSMUSG00000063142	Kcnma1	0.106424	0.0712573	-0.0799524	0.0270849	0.925	0.971	1	0	SFARI					2	0
ENSMUSG00000025854	Fam20c	0.106428	0.0486164	0.0418161	0.00485782	0.116	0.08	1	0
ENSMUSG00000042202	Slc35e2	0.106647	0.0607688	-0.0535296	0.0136021	0.1765	0.227	1	0
ENSMUSG00000029920	Smarcad1	0.10669	0.14378	-0.0812143	0.0586448	0.2945	0.377	1	0
ENSMUSG00000039615	Stub1	0.10671	0.0409564	0.0708472	0.00889016	0.194	0.15	1	0
ENSMUSG00000037989	Wnk2	0.106914	0.0541764	-0.0485488	0.0123157	0.2485	0.31	1	0
ENSMUSG00000026017	Carf	0.106957	0.00851196	-0.0603195	0	0.1725	0.219	1	0
ENSMUSG00000000168	Dlat	0.107005	0.0669355	-0.0582597	0.0204262	0.1685	0.217	1	0
ENSMUSG00000024943	Smc5	0.107616	0.144932	-0.0768554	0.0444576	0.1965	0.259	1	0
ENSMUSG00000028514	Usp24	0.107645	0.0355467	-0.0493529	0.00910032	0.3715	0.441	1	0
ENSMUSG00000004677	Myo9b	0.1077	0.105602	-0.0891468	0.0205175	0.183	0.23	1	0	SFARI					2	0
ENSMUSG00000037712	Fermt2	0.107837	0.00568393	-0.0357078	0.00464757	0.139	0.187	1	0
ENSMUSG00000086614	Gm14330	0.107927	0.0428916	-0.0489271	0.0100507	0.0775	0.112	1	0
ENSMUSG00000029430	Ran	0.107971	0.0957072	-0.0455099	0.0150762	0.0735	0.11	1	0
ENSMUSG00000057133	Chd6	0.10801	0.0753258	-0.0745179	0.0216074	0.508	0.567	1	0
ENSMUSG00000040591	1110051M20Rik	0.108095	0.063876	-0.0914786	0.00741923	0.369	0.42	1	0
ENSMUSG00000022951	Rcan1	0.108201	0.0438373	-0.0414541	0.00457462	0.162	0.211	1	0
ENSMUSG00000024639	Gnaq	0.108205	0.095343	-0.0996682	0.049471	0.501	0.57	1	0
ENSMUSG00000037787	Coa8	0.10825	0	-0.0508641	0	0.107	0.147	1	0
ENSMUSG00000037996	Slc24a2	0.10825	0.0442468	-0.079311	0.0104796	0.8185	0.877	1	0	SFARI					2	0
ENSMUSG00000021711	Trappc13	0.108358	0.0966833	-0.0555379	0.0205634	0.1725	0.225	1	0
ENSMUSG00000071658	Gng3	0.108431	0.0619507	-0.0528563	0.00507533	0.071	0.104	1	0
ENSMUSG00000050321	Neto1	0.108606	0.0509143	0.0783601	0.0136434	0.9265	0.939	1	0
ENSMUSG00000028124	Gclm	0.108639	0.0942752	-0.0629275	0.0151509	0.079	0.115	1	0
ENSMUSG00000037416	Dmxl1	0.109001	0.134959	-0.088901	0.0412512	0.556	0.647	1	0
ENSMUSG00000030766	Arhgap17	0.109274	0.0425887	-0.0548699	0.00677836	0.178	0.227	1	0
ENSMUSG00000037788	Vopp1	0.109292	0.0639822	-0.0504785	0.0117124	0.139	0.184	1	0
ENSMUSG00000038371	Sbf2	0.109296	0.0814048	-0.0907975	0.0202014	0.739	0.797	1	0
ENSMUSG00000027534	Snx16	0.109322	0.0547655	-0.058898	0.00500069	0.09	0.126	1	0
ENSMUSG00000007817	Zmiz1	0.109528	0.116862	0.0694902	0.022874	0.0895	0.131	1	0	SFARI					2	1
ENSMUSG00000023033	Scn8a	0.109538	0.0648379	0.108528	0.0157351	0.753	0.762	1	0	SFARI					1	0
ENSMUSG00000056856	Jakmip3	0.109588	0.101747	-0.0606899	0.0125172	0.254	0.316	1	0
ENSMUSG00000040855	Reps2	0.109767	0.125813	-0.0953148	0.0283219	0.675	0.714	1	0
ENSMUSG00000008348	Ubc	0.110054	0.117852	0.0867798	0.0272053	0.2475	0.195	1	0
ENSMUSG00000026409	Pfkfb2	0.110079	0.0855679	-0.0513637	0.0098565	0.095	0.134	1	0
ENSMUSG00000036810	Cnep1r1	0.110357	0.0355764	-0.0471992	0.00484628	0.1095	0.15	1	0
ENSMUSG00000043857	Mgat5b	0.110425	0.0406938	0.0897318	0.00550932	0.357	0.302	1	0
ENSMUSG00000028218	Cibar1	0.11048	0.0239346	-0.0611403	0	0.2035	0.254	1	0
ENSMUSG00000020936	Nmt1	0.110591	0.0755204	-0.0391713	0.0020798	0.235	0.297	1	0
ENSMUSG00000020160	Meis1	0.110604	0.112807	-0.0857225	0.0323148	0.1365	0.182	1	0
ENSMUSG00000043441	Gpr149	0.11061	0.0150541	-0.111165	0.00495214	0.0895	0.123	1	0
ENSMUSG00000052337	Immt	0.110793	0.0930624	-0.0512609	0.0289895	0.19	0.243	1	0
ENSMUSG00000037957	Wdr20	0.110818	0.0249347	-0.0587985	0.0133937	0.1915	0.241	1	0
ENSMUSG00000028648	Ndufs5	0.110964	0.0560641	0.0762262	0.0111736	0.1875	0.144	1	0
ENSMUSG00000023960	Enpp5	0.111125	0.0475029	0.108742	0.0019751	0.2965	0.257	1	0
ENSMUSG00000038563	Efl1	0.111277	0.147709	-0.0716647	0.0253607	0.159	0.214	1	0
ENSMUSG00000035311	Gnptab	0.111287	0.0512118	-0.0669625	0.00484628	0.114	0.152	1	0
ENSMUSG00000023072	Cep89	0.111573	0.0710289	-0.068247	0.0168622	0.1205	0.16	1	0
ENSMUSG00000026280	Atg4b	0.111899	0.063601	-0.0450724	0.0149291	0.084	0.12	1	0
ENSMUSG00000021057	Akap5	0.111955	0.0382694	-0.0898115	0.0155411	0.2005	0.246	1	0
ENSMUSG00000022961	Son	0.112111	0.0141008	0.103622	0.0185396	0.806	0.797	1	0	SFARI;EAGLE		Moderate	11	Discordant	1	1
ENSMUSG00000021262	Evl	0.112216	0.13459	-0.0609228	0.0205718	0.3585	0.43	1	0
ENSMUSG00000079427	Mthfsl	0.112281	0.0763877	-0.0648041	0.0072095	0.1215	0.163	1	0
ENSMUSG00000019877	Serinc1	0.112347	0.088308	0.120615	0.023884	0.4265	0.385	1	0
ENSMUSG00000067942	Zfp160	0.112373	0.0596528	-0.0876636	0.00473383	0.1365	0.176	1	0
ENSMUSG00000032575	Manf	0.112529	0.0312349	-0.0553393	0.00839626	0.242	0.294	1	0
ENSMUSG00000049658	Bdp1	0.112566	0.0267755	-0.0752003	0.00376436	0.345	0.404	1	0
ENSMUSG00000051098	Mblac2	0.112605	0.0799967	-0.0583477	0.0168274	0.238	0.297	1	0
ENSMUSG00000028995	Fam126a	0.112681	0.150343	-0.0762049	0.0416441	0.094	0.139	1	0
ENSMUSG00000026384	Ptpn4	0.112714	0.010252	-0.06809	0.0203253	0.5135	0.572	1	0	SFARI						1
ENSMUSG00000094910	D430019H16Rik	0.112832	0.0998328	-0.0825092	0.0164732	0.1455	0.19	1	0
ENSMUSG00000006333	Rps9	0.112871	0.0155264	0.051715	0	0.1295	0.094	1	0
ENSMUSG00000031355	Arhgap6	0.112909	0.0587552	-0.0729711	0.0151135	0.2715	0.324	1	0
ENSMUSG00000033632	AW554918	0.113064	0.0776863	-0.0640777	0.0210345	0.233	0.283	1	0
ENSMUSG00000028525	Pde4b	0.113068	0.0782686	0.265717	0.0478618	0.6535	0.604	1	0
ENSMUSG00000025203	Scd2	0.113127	0.107472	0.0957835	0.0193499	0.21	0.166	1	0
ENSMUSG00000030806	Stx1b	0.113243	0.0323624	0.0726309	0.00910845	0.1765	0.136	1	0
ENSMUSG00000035107	Dcbld2	0.113249	0.00644849	-0.0314064	0.00498847	0.075	0.11	1	0
ENSMUSG00000097156	Gm3764	0.113285	0.0280176	-0.0509942	0.0137549	0.1535	0.201	1	0
ENSMUSG00000052516	Robo2	0.113512	0.104307	-0.0641528	0.0267173	0.984	0.987	1	0	SFARI					2	0
ENSMUSG00000002017	Fam98a	0.113636	0.137993	-0.047802	0.0228683	0.067	0.104	1	0
ENSMUSG00000027194	Ttc17	0.11387	0.0214514	-0.0624704	0.00601854	0.279	0.337	1	0
ENSMUSG00000002949	Timm44	0.113874	0.0454538	-0.0534653	0.0019751	0.3105	0.374	1	0
ENSMUSG00000025245	Lztfl1	0.113878	0.103197	-0.0858816	0.0233064	0.253	0.305	1	0
ENSMUSG00000020668	Kif3c	0.114134	0.0425029	-0.047723	0	0.159	0.206	1	0
ENSMUSG00000023912	Slc25a27	0.114193	0.138792	-0.0675436	0.0417252	0.2875	0.356	1	0	SFARI					2	0
ENSMUSG00000052407	Ccdc171	0.114371	0.110386	-0.0537811	0.0174814	0.083	0.12	1	0
ENSMUSG00000041115	Iqsec2	0.114471	0.078776	-0.068711	0.0267468	0.332	0.39	1	0	SFARI					1	1
ENSMUSG00000033054	Npat	0.114508	0.103706	-0.0566518	0.019852	0.206	0.262	1	0
ENSMUSG00000038546	Ranbp9	0.114631	0.0498129	-0.0700443	0.00699927	0.4115	0.471	1	0
ENSMUSG00000020022	Ndufa12	0.114924	0.0321355	0.0480943	0	0.1335	0.096	1	0
ENSMUSG00000025766	D3Ertd751e	0.114934	0.160072	-0.086755	0.0512507	0.1525	0.211	1	0
ENSMUSG00000063455	D630045J12Rik	0.114937	0.157184	-0.0925979	0.0606631	0.211	0.275	1	0
ENSMUSG00000033287	Kctd17	0.115168	0.110057	-0.0773223	0.0410349	0.3315	0.396	1	0
ENSMUSG00000028538	St3gal3	0.115181	0.0311753	-0.0530348	0	0.186	0.235	1	0
ENSMUSG00000001036	Epn2	0.115268	0.128991	-0.0759777	0.0314519	0.3195	0.382	1	0
ENSMUSG00000032503	Arpp21	0.115532	0.0540794	-0.0570071	0.0264264	0.984	0.989	1	0
ENSMUSG00000022354	Ndufb9	0.115542	0.0411442	0.0937616	0.0195977	0.1955	0.155	1	0
ENSMUSG00000029094	Afap1	0.115565	0.10922	-0.042949	0.0221511	0.094	0.134	1	0
ENSMUSG00000063108	Zfp26	0.115606	0.0411076	-0.0572603	0.00971569	0.1205	0.16	1	0
ENSMUSG00000041852	Tcf20	0.115607	0.0573553	-0.0892166	0.00929518	0.698	0.754	1	0	SFARI;EAGLE;TADA	9.63e-05	Definitive	38	Concordant	1	1
ENSMUSG00000017858	Ift52	0.115647	0.0539729	-0.057382	0.00486941	0.111	0.15	1	0
ENSMUSG00000059742	Kcnh7	0.115671	0.119869	-0.160443	0.0397433	0.5775	0.615	1	0
ENSMUSG00000026312	Cdh7	0.116064	0.00519968	-0.157353	0.00822035	0.3945	0.447	1	0
ENSMUSG00000042508	Dmtf1	0.116131	0.152353	-0.0705897	0.0340078	0.241	0.307	1	0
ENSMUSG00000013622	Atraid	0.116259	0.0299956	-0.0342541	0.00890957	0.19	0.243	1	0
ENSMUSG00000029554	Mad1l1	0.116265	0.0230209	-0.0415235	0.00496419	0.0895	0.126	1	0
ENSMUSG00000010803	Gabra1	0.116267	0.0987131	0.0842501	0.0248322	0.2485	0.201	1	0	TADA	0.00029434
ENSMUSG00000022838	Eaf2	0.116334	0.0356433	-0.0502365	0.00699527	0.1495	0.195	1	0
ENSMUSG00000024091	Vapa	0.116403	0.115544	-0.0670979	0.0247203	0.3275	0.39	1	0
ENSMUSG00000030663	1110004F10Rik	0.11656	0.143401	-0.0518688	0.0297872	0.084	0.126	1	0
ENSMUSG00000005566	Trim28	0.116659	0.041377	0.0453237	0.0145737	0.115	0.08	1	0
ENSMUSG00000021687	Scamp1	0.11673	0.0482277	-0.0824622	0	0.4025	0.457	1	0
ENSMUSG00000073147	5031425E22Rik	0.116882	0.106621	-0.0400131	0.042244	0.356	0.425	1	0
ENSMUSG00000029287	Tgfbr3	0.116987	0.0926325	-0.095029	0.0227858	0.2715	0.321	1	0
ENSMUSG00000040044	Orc3	0.117031	0.0833263	-0.0747651	0.0125172	0.258	0.31	1	0
ENSMUSG00000041268	Dmxl2	0.117057	0.0804475	-0.0472942	0.02905	0.579	0.644	1	0	SFARI					2	0
ENSMUSG00000058835	Abi1	0.117077	0.0714335	-0.0862592	0.0294366	0.503	0.561	1	0
ENSMUSG00000020840	Blmh	0.117121	0.11989	-0.0600434	0.0117124	0.146	0.193	1	0
ENSMUSG00000072501	Phf20l1	0.117242	0.0901045	-0.0759201	0.0107526	0.6005	0.684	1	0
ENSMUSG00000117286	Gm1043	0.117304	0.10076	-0.0646971	0.0215682	0.5495	0.626	1	0
ENSMUSG00000030835	Nomo1	0.117346	0.0661898	0.0615306	0.00946772	0.139	0.102	1	0
ENSMUSG00000031314	Taf1	0.117355	0.0902791	-0.0633182	0.0148928	0.234	0.289	1	0	SFARI						1
ENSMUSG00000037234	Hook3	0.117433	0.0217128	-0.0601837	0.0041385	0.2565	0.31	1	0
ENSMUSG00000028439	Fam219a	0.117494	0.0722809	-0.0511361	0.00817751	0.274	0.332	1	0
ENSMUSG00000040560	Wdr7	0.117562	0.0332395	-0.0620396	0.00309133	0.5015	0.57	1	0
ENSMUSG00000034544	Rsrc1	0.117628	0.104854	-0.0735312	0.0213142	0.314	0.374	1	0	SFARI						1
ENSMUSG00000021819	Zswim8	0.117665	0.031417	-0.0771107	0.00658865	0.222	0.267	1	0
ENSMUSG00000071533	Pcnp	0.117718	0.0288131	-0.0689896	0.0111006	0.2045	0.251	1	0
ENSMUSG00000039233	Tbce	0.117783	0.034435	-0.0971687	0	0.278	0.326	1	0
ENSMUSG00000028843	Sh3bgrl3	0.117816	0.0640998	0.0734718	0.00921125	0.1495	0.112	1	0
ENSMUSG00000038349	Plcl1	0.117853	0.101103	-0.124268	0.0178976	0.1405	0.182	1	0
ENSMUSG00000110741	Gm48091	0.1179	0.118871	-0.0442221	0.0146434	0.1005	0.142	1	0
ENSMUSG00000003847	Nfat5	0.117919	0.050975	-0.0741105	0.0251899	0.595	0.663	1	0
ENSMUSG00000045411	2410002F23Rik	0.118012	0.0635786	-0.0416363	0.00995266	0.087	0.123	1	0
ENSMUSG00000051650	B3gnt2	0.118228	0.0776345	-0.0357758	0.0121882	0.099	0.139	1	0
ENSMUSG00000079641	Rpl39	0.118261	0.0177436	0.0532791	0.00238629	0.1295	0.094	1	0
ENSMUSG00000024892	Pcx	0.118421	0	0.0638316	0	0.15	0.112	1	0	SFARI					3	0
ENSMUSG00000028060	Khdc4	0.118606	0.0551889	-0.0834274	0.00809639	0.294	0.342	1	0
ENSMUSG00000034275	Igsf9b	0.118622	0.0682132	-0.0677139	0.00554928	0.3395	0.398	1	0
ENSMUSG00000078676	Casc3	0.118764	0.0473629	-0.0556277	0.00890957	0.194	0.243	1	0
ENSMUSG00000041608	Entpd3	0.118786	0.13481	-0.0806466	0.0244064	0.114	0.155	1	0
ENSMUSG00000072294	Klf12	0.118801	0.0775738	-0.115225	0.030117	0.321	0.369	1	0
ENSMUSG00000027465	Tbc1d20	0.118804	0.107665	-0.0487499	0.0186758	0.143	0.19	1	0
ENSMUSG00000030822	Prr14	0.118879	0.0866471	-0.0579293	0.0167044	0.1245	0.166	1	0
ENSMUSG00000038909	Kat7	0.119053	0.0794638	-0.046822	0.0192032	0.1255	0.168	1	0
ENSMUSG00000063889	Crem	0.119203	0.00235808	-0.0635965	0.00248512	0.088	0.123	1	0
ENSMUSG00000047539	Fbxo28	0.119204	0.132223	-0.0527268	0.0284048	0.132	0.179	1	0
ENSMUSG00000032786	Alas1	0.119208	0.00358557	0.0570493	0.00719255	0.123	0.088	1	0
ENSMUSG00000048307	Ankrd46	0.119301	0.0896405	-0.0474172	0.0176543	0.0775	0.112	1	0
ENSMUSG00000031153	Gripap1	0.119302	0.128519	-0.0389636	0.0326996	0.436	0.519	1	0
ENSMUSG00000062995	Ica1	0.119316	0.00170884	-0.0835234	0	0.4505	0.511	1	0	SFARI					2	0
ENSMUSG00000033712	Ccar2	0.119489	0.0476175	-0.045378	0.010026	0.083	0.118	1	0
ENSMUSG00000035152	Ap2b1	0.119496	0.0593296	-0.0705762	0.0137343	0.5095	0.578	1	0
ENSMUSG00000022594	Lynx1	0.119615	0.0727459	-0.0569703	0.00912883	0.167	0.214	1	0
ENSMUSG00000020380	Rad50	0.119705	0.0854935	-0.0403729	0.0125789	0.075	0.11	1	0
ENSMUSG00000028399	Ptprd	0.119781	0.143496	-0.102338	0.0323119	0.9985	1	1	0
ENSMUSG00000038895	Zfp653	0.119805	0.0855048	-0.035036	0.010026	0.075	0.11	1	0
ENSMUSG00000027882	Stxbp3	0.119808	0.120641	-0.0460689	0.0152642	0.0695	0.104	1	0
ENSMUSG00000006299	Aamp	0.119877	0.0787321	0.0577681	0.00942399	0.1485	0.11	1	0
[truncated: 4,262 more rows]

## Sheet: D2_MSN
ensembl	gene	p_val.mean	p_val.std	avg_log2FC.mean	avg_log2FC.std	pct.1.mean	pct.2.mean	padj.mean	padj.std	ASD.status	TADA.FDR	EAGLE.annotation	EAGLE.score	EAGLE.concordance	SFARI.score	SFARI.syndromic
ENSMUSG00000092341	Malat1	1.44665e-22	1.49309e-22	-0.327148	0.00450195	1	1	3.59291e-18	3.70823e-18
ENSMUSG00000045573	Penk	5.82563e-15	5.29299e-15	0.494614	0.00786709	0.984	0.982	1.44685e-10	1.31457e-10
ENSMUSG00000022748	Cmss1	6.08823e-13	6.52256e-14	0.458061	0.00562062	0.8635	0.743	1.51207e-08	1.61994e-09
ENSMUSG00000038128	Camk4	1.32348e-11	1.86676e-11	-0.376058	0.0368954	0.903	0.961	3.28698e-07	4.63628e-07	SFARI					2	0
ENSMUSG00000008658	Rbfox1	7.40856e-10	1.04415e-09	-0.22095	0.0254855	1	1	1.83999e-05	2.59326e-05	SFARI					2	0
ENSMUSG00000098973	Mir6236	8.75391e-09	4.51807e-09	0.460746	0.0277092	0.869	0.79	0.000217412	0.000112211
ENSMUSG00000046159	Chrm3	1.12184e-08	6.84427e-09	-0.328017	0.02643	0.499	0.701	0.000278619	0.000169984	SFARI					2	0
ENSMUSG00000054728	Phactr1	3.81954e-08	4.64354e-08	-0.184459	0.00491113	1	1	0.000948622	0.00115327
ENSMUSG00000023944	Hsp90ab1	1.1556e-07	1.54713e-07	0.415802	0.0605496	0.613	0.457	0.00287006	0.00384244
ENSMUSG00000015656	Hspa8	1.40094e-07	1.9366e-07	0.405105	0.0486516	0.5195	0.362	0.00347937	0.00480975
ENSMUSG00000021719	Rgs7bp	2.23835e-07	2.76466e-07	-0.29022	0.0299069	0.7155	0.892	0.00555918	0.0068663
ENSMUSG00000089710	Gm15810	4.35391e-07	4.99847e-07	-0.286925	0.0106376	0.2205	0.381	0.0108134	0.0124142
ENSMUSG00000055409	Nell1	4.50711e-07	4.89329e-07	-0.29984	0.0178306	0.5145	0.706	0.0111939	0.012153
ENSMUSG00000057378	Ryr3	4.64216e-07	7.79231e-08	-0.205716	0.00198443	0.995	0.992	0.0115293	0.0019353
ENSMUSG00000021318	Gli3	4.67996e-07	5.04372e-07	-0.326294	0.00685811	0.3305	0.507	0.0116232	0.0125266
ENSMUSG00000022199	Slc22a17	4.73406e-07	5.8723e-07	0.369637	0.0320747	0.613	0.504	0.0117575	0.0145844
ENSMUSG00000059602	Syn3	5.05195e-07	5.73031e-07	-0.267894	0.020348	0.3255	0.504	0.012547	0.0142318
ENSMUSG00000001270	Ckb	8.69722e-07	8.78901e-07	0.424381	0.0154722	0.8505	0.785	0.0216004	0.0218284
ENSMUSG00000106515	Gm30382	1.33263e-06	1.56807e-06	-0.207443	0.00233709	0.1275	0.268	0.0330973	0.0389447
ENSMUSG00000033307	Mif	1.46678e-06	7.21954e-07	0.2389	0.00409695	0.2255	0.1	0.0364289	0.0179304
ENSMUSG00000042846	Lrrtm3	1.5544e-06	2.96498e-07	-0.311384	0.000750378	0.836	0.919	0.0386051	0.00736382
ENSMUSG00000031841	Cdh13	2.47654e-06	1.2703e-06	-0.311735	0.00359204	0.3095	0.467	0.0615073	0.0315493	SFARI					2	0
ENSMUSG00000060924	Csmd1	2.51951e-06	3.54157e-06	-0.189153	0.0286243	1	1	0.0625746	0.0879584	SFARI					2	0
ENSMUSG00000024121	Atp6v0c	2.72091e-06	1.03688e-06	0.321375	0.023363	0.572	0.433	0.0675765	0.025752
ENSMUSG00000056602	Fry	2.74956e-06	4.25683e-08	-0.232722	0.00238629	0.857	0.94	0.068288	0.00105723
ENSMUSG00000026610	Esrrg	2.95933e-06	1.31632e-06	-0.311676	0.00555936	0.5565	0.675	0.0734979	0.0326922
ENSMUSG00000026885	Ttll11	3.28318e-06	2.93555e-06	-0.217914	0.00739235	0.341	0.517	0.0815411	0.0729074
ENSMUSG00000026576	Atp1b1	3.52641e-06	4.90619e-06	0.29964	0.0340594	0.7415	0.627	0.0875819	0.12185
ENSMUSG00000021385	Ippk	3.97468e-06	1.18903e-06	-0.157424	0	0.101	0.226	0.0987151	0.0295307
ENSMUSG00000027210	Meis2	4.89486e-06	3.68663e-06	-0.21665	0.00773009	0.971	0.992	0.121569	0.0915613	SFARI;EAGLE;TADA	0.00517313	Moderate	7.5	Discordant	1	1
ENSMUSG00000022108	Itm2b	5.25688e-06	3.273e-06	0.286144	0.018056	0.496	0.36	0.13056	0.0812882
ENSMUSG00000040606	Kazn	6.40812e-06	8.7499e-06	-0.280479	0.0332134	0.845	0.932	0.159152	0.217312
ENSMUSG00000021665	Hexb	6.43886e-06	3.48298e-06	0.19696	0.00426837	0.202	0.089	0.159916	0.0865032
ENSMUSG00000026657	Frmd4a	6.64697e-06	9.09947e-06	-0.29535	0.0452911	0.5935	0.73	0.165084	0.225995
ENSMUSG00000040282	Cdin1	7.113e-06	5.47951e-06	-0.242034	0.0102941	0.2375	0.383	0.176658	0.136089
ENSMUSG00000096768	Gm47283	7.48098e-06	9.38344e-06	-0.252507	0.026255	0.328	0.491	0.185798	0.233047
ENSMUSG00000033510	Otud7a	8.02487e-06	2.11574e-07	-0.221446	0.00133789	0.555	0.719	0.199306	0.00525466	SFARI					2	0
ENSMUSG00000058589	Anks1b	8.74809e-06	1.1262e-05	-0.204324	0.0160456	0.9985	1	0.217268	0.279703	SFARI					2	1
ENSMUSG00000025326	Ube3a	9.18246e-06	1.17686e-05	-0.239532	0.0220579	0.6705	0.811	0.228056	0.292284	SFARI					1	1
ENSMUSG00000055214	Pld5	9.22697e-06	2.26528e-06	-0.262165	0.00369616	0.2875	0.441	0.229161	0.0562606
ENSMUSG00000057914	Cacnb2	1.11395e-05	1.00669e-05	-0.240738	0.00774009	0.995	0.997	0.27666	0.250021	SFARI					2	0
ENSMUSG00000031971	Ccsap	1.11704e-05	1.36311e-05	-0.155338	0.0185485	0.1325	0.268	0.277427	0.338543
ENSMUSG00000020627	Klhl29	1.25581e-05	5.55758e-06	-0.221183	0.0101205	0.702	0.816	0.311892	0.138028
ENSMUSG00000019505	Ubb	1.34897e-05	1.88187e-05	0.385803	0.025473	0.525	0.391	0.33503	0.467381
ENSMUSG00000047747	Rnf150	1.46357e-05	1.84619e-05	-0.246251	0.0210345	0.7165	0.827	0.363492	0.458521
ENSMUSG00000021268	Meg3	1.53679e-05	1.71921e-05	0.15881	0.0163902	1	1	0.381678	0.426984
ENSMUSG00000021068	Nin	1.55315e-05	1.24781e-05	-0.177129	0.0134585	0.5775	0.748	0.385741	0.309907
ENSMUSG00000034780	B3galt1	1.58026e-05	4.43459e-06	-0.183028	0.00641783	0.912	0.961	0.392472	0.110137
ENSMUSG00000068696	Gpr88	1.69441e-05	2.25764e-05	0.334545	0.0351288	0.7345	0.64	0.420823	0.560707
ENSMUSG00000036306	Lzts1	1.97457e-05	1.8069e-05	-0.179532	0.0148117	0.336	0.491	0.490404	0.448761
ENSMUSG00000060487	Samd5	2.03345e-05	5.72277e-08	-0.235913	0.00510496	0.3415	0.493	0.505027	0.00142131
ENSMUSG00000020160	Meis1	2.21921e-05	1.96124e-05	-0.224714	0.0144119	0.2165	0.36	0.551162	0.487093
ENSMUSG00000055835	Zfp1	2.25429e-05	7.30716e-06	-0.162415	0	0.1195	0.236	0.559876	0.181481
ENSMUSG00000028274	Rngtt	2.26419e-05	3.07533e-05	-0.226487	0.0414136	0.316	0.478	0.511127	0.69137
ENSMUSG00000078970	Dnaaf10	2.52642e-05	3.303e-05	-0.135603	0.0150762	0.0615	0.163	0.5237	0.67359
ENSMUSG00000057147	Dph6	2.54893e-05	2.81448e-05	-0.188024	0.0140228	0.3595	0.528	0.569391	0.608973
ENSMUSG00000085944	1700003D09Rik	2.67063e-05	2.89627e-05	-0.144424	0.0140067	0.11	0.231	0.577322	0.597757
ENSMUSG00000026204	Ptprn	2.74525e-05	3.33519e-05	0.310797	0.0161418	0.8245	0.764	0.548047	0.639158
ENSMUSG00000026223	Itm2c	3.07291e-05	4.33765e-05	0.280954	0.0736351	0.528	0.378	0.500711	0.706101
ENSMUSG00000029817	Tra2a	3.18905e-05	3.40027e-05	-0.19816	0.0138092	0.3675	0.541	0.597444	0.5693
ENSMUSG00000064115	Cadm2	3.21659e-05	4.34175e-05	-0.16563	0.0270826	1	1	0.518194	0.681377	SFARI					2	0
ENSMUSG00000113694	Gm48747	3.31133e-05	1.06743e-05	-0.148233	0.0180162	0.157	0.286	0.817472	0.258134
ENSMUSG00000047804	Akap10	3.38447e-05	5.65559e-06	-0.181391	0.00218679	0.2005	0.333	0.840566	0.140462
ENSMUSG00000039197	Adk	3.43763e-05	2.50832e-05	-0.355469	0.0254412	0.5315	0.661	0.706633	0.414883	SFARI					2	0
ENSMUSG00000105773	4930563F08Rik	3.57957e-05	2.77907e-05	-0.132956	0.00505021	0.0575	0.15	0.700485	0.423578
ENSMUSG00000054453	Sytl5	3.58048e-05	4.44253e-05	-0.14901	0.0094458	0.1075	0.223	0.554532	0.629987
ENSMUSG00000040640	Erc2	4.26362e-05	5.95706e-05	-0.203788	0.0427951	0.984	0.995	0.506375	0.698091
ENSMUSG00000025193	Cutc	4.56874e-05	5.35791e-05	-0.110839	0.00775775	0.03	0.108	0.596877	0.570103
ENSMUSG00000049422	Chchd10	4.88894e-05	6.53794e-05	0.29649	0.0206792	0.3465	0.22	0.533022	0.660407
ENSMUSG00000034152	Exoc3	4.94218e-05	3.41219e-06	-0.174733	0	0.199	0.325	1	0	SFARI					2	0
ENSMUSG00000002107	Celf2	4.99936e-05	4.84452e-05	-0.115457	0.00857113	1	1	0.69543	0.430726	SFARI					2	1
ENSMUSG00000072235	Tuba1a	5.18347e-05	5.37607e-05	0.235424	0.0118164	0.2505	0.139	0.671618	0.464402
ENSMUSG00000038267	Slc22a23	5.22925e-05	6.67923e-05	-0.2506	0.0257914	0.5145	0.664	0.562874	0.618189
ENSMUSG00000053877	Srcap	6.48871e-05	6.04125e-05	-0.137367	0.00671884	0.1625	0.291	0.775295	0.317781	SFARI					1	0
ENSMUSG00000001983	Taco1	6.51131e-05	3.46146e-05	-0.173915	0.00780225	0.3005	0.444	1	0
ENSMUSG00000053465	Hs6st3	6.57523e-05	5.02141e-05	-0.269128	0.00564785	0.937	0.969	0.87559	0.175942
ENSMUSG00000032420	Nt5e	7.12227e-05	1.00234e-05	-0.188581	0.00459523	0.16	0.273	1	0
ENSMUSG00000029313	Aff1	8.03195e-05	6.1581e-05	-0.130768	0.0171456	0.0815	0.178	0.956674	0.0612718
ENSMUSG00000055839	Elob	8.14974e-05	9.42383e-05	0.207788	0.0317579	0.268	0.152	0.684543	0.446124
ENSMUSG00000024261	Syt4	9.01163e-05	8.00298e-05	0.229075	0.0150639	0.399	0.276	0.916335	0.118321
ENSMUSG00000045083	Lingo2	9.02862e-05	3.07852e-05	0.244357	0.0247819	0.1115	0.037	1	0
ENSMUSG00000095253	Zfp799	9.31947e-05	0	-0.168123	0	0.152	0.265	1	0
ENSMUSG00000101609	Kcnq1ot1	9.69408e-05	0.000111137	-0.225458	0.0216849	0.291	0.42	0.72793	0.384765
ENSMUSG00000021448	Shc3	9.94828e-05	5.01611e-05	-0.195802	0.00357317	0.349	0.504	1	0
ENSMUSG00000028086	Fbxw7	0.000101235	5.66497e-05	-0.183888	0.00883243	0.3675	0.517	1	0
ENSMUSG00000020524	Gria1	0.000101946	2.22901e-05	-0.20328	0.00248966	0.9135	0.95	1	0	SFARI					2	0
ENSMUSG00000078919	Dpm1	0.000104963	3.06258e-05	-0.142838	0.00461602	0.1415	0.255	1	0
ENSMUSG00000029563	Foxp2	0.000107358	0.000137472	0.355843	0.0137075	0.5135	0.404	0.626053	0.52884	SFARI					1	0
ENSMUSG00000051177	Plcb1	0.00010747	0.000117658	-0.171068	0.0207153	0.996	1	0.80143	0.280821	SFARI					2	0
ENSMUSG00000022708	Zbtb20	0.000107994	3.75933e-05	0.261812	0.0150639	0.89	0.856	1	0	SFARI					1	1
ENSMUSG00000042751	Nmnat2	0.000108413	6.13294e-05	-0.186307	0.00943706	0.3045	0.444	1	0
ENSMUSG00000068923	Syt11	0.000109089	3.63176e-07	0.287717	0.0169484	0.5815	0.491	1	0
ENSMUSG00000038696	Mapkap1	0.00011119	0.000100026	-0.144305	0.0255786	0.278	0.428	1	0
ENSMUSG00000032547	Ryk	0.000111863	6.08645e-05	-0.143147	0.00462649	0.139	0.252	1	0
ENSMUSG00000021990	Spata13	0.000112052	9.32323e-05	-0.155291	0.00843095	0.214	0.346	1	0
ENSMUSG00000029655	N4bp2l2	0.000124615	4.79905e-06	-0.168432	0.00871175	0.366	0.514	1	0
ENSMUSG00000040794	C1qtnf4	0.00013457	0.000152183	0.256164	0.0363173	0.5695	0.462	0.834802	0.233625
ENSMUSG00000002459	Rgs20	0.000145053	0.000144625	-0.263584	0.0151455	0.6695	0.787	1	0
ENSMUSG00000033499	Larp4b	0.000149212	6.7603e-05	-0.160359	0.0162575	0.247	0.378	1	0
ENSMUSG00000036273	Lrrk2	0.000149688	0.000191724	-0.298963	0.0305397	0.736	0.845	0.675331	0.459151
ENSMUSG00000050783	Htr1f	0.000164509	0.000120141	-0.253345	0.0045542	0.148	0.252	1	0
ENSMUSG00000034610	Tut4	0.000166012	0.000191545	-0.176119	0.0313038	0.525	0.685	0.879604	0.170265
ENSMUSG00000006262	Mob1b	0.000167701	0.000190135	-0.150332	0.00953408	0.101	0.202	0.912966	0.123085
ENSMUSG00000054423	Cadps	0.00017009	0.000163228	-0.220968	0.0144517	0.5775	0.706	1	0	SFARI					2	0
ENSMUSG00000033161	Atp1a1	0.000170702	0.000143454	0.246012	0.00828712	0.425	0.31	1	0	SFARI					2	1
ENSMUSG00000037674	Rfx7	0.000174065	1.25593e-05	-0.224307	0.00540472	0.5435	0.669	1	0	SFARI					3	1
ENSMUSG00000048602	Morc2b	0.00017512	7.17696e-05	-0.134619	0.00498847	0.0695	0.155	1	0
ENSMUSG00000020572	Nampt	0.000176254	0	-0.105902	0	0.063	0.147	1	0
ENSMUSG00000019820	Utrn	0.000177687	0.000176486	-0.223666	0.0277257	0.6865	0.808	1	0
ENSMUSG00000042590	Ipo11	0.000178504	0.000196719	-0.188415	0.0181632	0.249	0.373	0.989303	0.0151285
ENSMUSG00000110824	Gm48677	0.000192047	4.04743e-05	-0.106337	0.00577984	0.2455	0.383	1	0
ENSMUSG00000025571	Tnrc6c	0.000193289	0.00025809	-0.209453	0.0307479	0.6155	0.774	0.634007	0.517592	SFARI					2	0
ENSMUSG00000030621	Me3	0.000222697	0.000301251	-0.213116	0.0463195	0.621	0.732	0.620212	0.537102
ENSMUSG00000028646	Rragc	0.000234796	9.71038e-05	-0.10923	0.00254717	0.0485	0.123	1	0
ENSMUSG00000033444	Specc1l	0.000243843	6.89767e-05	-0.14783	0.00393118	0.277	0.415	1	0
ENSMUSG00000041216	Clvs1	0.000250262	0.000319588	-0.231051	0.0395614	0.6665	0.803	0.80149	0.280736
ENSMUSG00000064138	Fam172a	0.000250886	8.13683e-05	-0.153073	0.00151244	0.458	0.609	1	0
ENSMUSG00000019802	Sec63	0.000251433	7.98581e-05	-0.155353	0.0085907	0.2035	0.323	1	0
ENSMUSG00000001017	Chtop	0.000253287	0.00020228	-0.123859	0.00712557	0.114	0.215	1	0
ENSMUSG00000028229	Rmdn1	0.000254763	0.000330368	-0.187335	0.0289935	0.3465	0.483	0.762739	0.335538
ENSMUSG00000114704	Gm48003	0.000258193	0.000172988	-0.155573	0.0136628	0.1365	0.241	1	0
ENSMUSG00000036564	Ndrg4	0.00026254	0.000203899	0.249753	0.0171796	0.7585	0.709	1	0
ENSMUSG00000033216	Eefsec	0.00028302	0.000397706	-0.190729	0.0447782	0.2115	0.339	0.522351	0.675498
ENSMUSG00000017491	Rarb	0.000289775	0.000304839	-0.17628	0.0199182	0.9345	0.974	1	0
ENSMUSG00000016150	Tenm1	0.00029358	0.000377626	-0.340026	0.0363293	0.412	0.525	0.829792	0.24071
ENSMUSG00000104106	Gm10848	0.000293816	0.00022375	-0.187522	0.0108913	0.3385	0.467	1	0
ENSMUSG00000079036	Alkbh1	0.0002978	0.000170791	-0.122999	0.00477818	0.1075	0.205	1	0
ENSMUSG00000021140	Pcnx	0.000299445	0.000265166	-0.141677	0.0156546	0.3585	0.501	1	0
ENSMUSG00000036800	Fam135b	0.000322274	0.000218248	-0.213207	0.00139459	0.5285	0.661	1	0
ENSMUSG00000046096	Mosmo	0.000329071	1.71953e-05	-0.114023	0.0024318	0.089	0.178	1	0
ENSMUSG00000019813	Cep57l1	0.000342114	0.000166723	-0.136882	0	0.1025	0.194	1	0
ENSMUSG00000032238	Rora	0.000350459	0.000470235	-0.167678	0.0253337	0.9805	0.992	0.722931	0.391834	SFARI						1
ENSMUSG00000050545	Fam228b	0.000352307	0.00041045	-0.133367	0.00238072	0.1075	0.205	1	0
ENSMUSG00000006651	Aplp1	0.000373885	0.000122745	0.228471	0.00142977	0.5395	0.436	1	0
ENSMUSG00000001323	Srr	0.000377081	0.000180153	-0.145303	0.00450393	0.1625	0.268	1	0
ENSMUSG00000027797	Dclk1	0.000382538	0.000403256	-0.189111	0.0211071	0.8675	0.94	1	0
ENSMUSG00000043733	Ptpn11	0.000382969	0.00052008	-0.163013	0.0257775	0.2585	0.388	0.688966	0.439869	SFARI					1	1
ENSMUSG00000031708	Tecr	0.000383372	0.000113785	0.207079	0.0120119	0.394	0.289	1	0
ENSMUSG00000018417	Myo1b	0.000394924	0.000132029	-0.160995	0.0103219	0.382	0.517	1	0
ENSMUSG00000058440	Nrf1	0.000406863	0.000308023	-0.14641	0.0110048	0.18	0.291	1	0
ENSMUSG00000040118	Cacna2d1	0.000414864	0.000310788	-0.155628	0.0135681	0.823	0.892	1	0	SFARI					2	0
ENSMUSG00000021373	Cap2	0.00042811	0.000110539	-0.160796	0	0.5155	0.672	1	0
ENSMUSG00000043991	Pura	0.000428441	0.000567131	-0.185326	0.0273174	0.215	0.336	0.840487	0.225586
ENSMUSG00000061136	Prpf40a	0.000432175	8.05409e-05	-0.155809	0.0159816	0.3475	0.491	1	0
ENSMUSG00000059003	Grin2a	0.000462062	0.00016333	-0.187557	0.00590104	0.836	0.913	1	0	SFARI;EAGLE		Limited	3.6	Discordant	1	0
ENSMUSG00000054387	Mdm4	0.000474283	0.00065365	-0.163472	0.0450964	0.3245	0.462	0.650049	0.494905
ENSMUSG00000024530	Prelid3a	0.00048088	0.000341823	-0.13484	0.0109812	0.18	0.289	1	0
ENSMUSG00000025006	Sorbs1	0.00048326	9.15144e-05	-0.227612	0.0126622	0.7925	0.887	1	0
ENSMUSG00000051285	Pcmtd1	0.000484126	0.000441479	-0.164956	0.0121527	0.55	0.701	1	0
ENSMUSG00000046329	Slc25a23	0.000496097	5.29774e-05	-0.164142	0.00630366	0.2245	0.336	1	0
ENSMUSG00000035382	Pcsk7	0.000508227	0.000622843	-0.176571	0.0177035	0.1965	0.304	1	0
ENSMUSG00000039115	Itga9	0.000509642	0.000540467	-0.179452	0.0197665	0.1795	0.289	1	0
ENSMUSG00000045128	Rpl18a	0.000515484	0.00024178	0.147144	0.0131916	0.1735	0.089	1	0
ENSMUSG00000026516	Nvl	0.000523354	9.7896e-05	-0.146392	0.00396171	0.2835	0.404	1	0
ENSMUSG00000073702	Rpl31	0.000536011	0.000659868	0.13439	0.0235016	0.2205	0.121	1	0
ENSMUSG00000045975	C2cd2	0.000538831	0.000683084	-0.116313	0.0146785	0.081	0.171	1	0
ENSMUSG00000032050	Rdx	0.000541671	0.000423486	-0.0897836	0.0100755	0.0525	0.126	1	0
ENSMUSG00000057060	Slc35f3	0.000544297	0.000731693	-0.205195	0.0465135	0.6575	0.766	0.834186	0.234497
ENSMUSG00000020738	Sumo2	0.000553676	0.000437608	-0.105985	0.00696344	0.117	0.215	1	0
ENSMUSG00000020893	Per1	0.000554772	0.000474101	0.20684	0.011356	0.3035	0.199	1	0	SFARI					2	0
ENSMUSG00000039599	Fam149b	0.000556962	0.000762399	-0.134795	0.0305243	0.122	0.226	0.72184	0.393378
ENSMUSG00000090223	Pcp4	0.000557719	0.000657193	0.298956	0.0208341	0.4985	0.412	1	0
ENSMUSG00000005893	Nr2c2	0.000561752	0.00026427	-0.155282	0.0134105	0.2995	0.425	1	0
ENSMUSG00000057359	Gm17494	0.000563559	0.000611106	-0.10542	0.00997699	0.071	0.152	1	0
ENSMUSG00000061904	Slc25a3	0.000563702	1.32338e-05	0.228972	0.00232114	0.6575	0.554	1	0
ENSMUSG00000027709	Mccc1	0.000564546	0.000300272	-0.128943	0.00241453	0.0945	0.181	1	0
ENSMUSG00000028484	Psip1	0.000565315	0.000316266	-0.141861	0	0.365	0.496	1	0
ENSMUSG00000038115	Ano2	0.000566349	0.000551035	-0.169649	0.0113983	0.2925	0.42	1	0
ENSMUSG00000049122	Frmd3	0.000569632	0.000487755	-0.111553	0.00964678	0.0905	0.178	1	0
ENSMUSG00000059586	Nsmce2	0.000583755	0.000779361	-0.128283	0.0416441	0.2935	0.433	0.905623	0.13347
ENSMUSG00000045903	Npas4	0.000585415	0.000451584	0.283468	0.0100178	0.2495	0.152	1	0
ENSMUSG00000087086	Gm13269	0.000593402	0.000390838	-0.174356	0.00144803	0.483	0.622	1	0
ENSMUSG00000047714	Ppp1r2	0.000594178	0.000618859	-0.221471	0.0246879	0.491	0.606	1	0
ENSMUSG00000025192	Entpd7	0.000597017	2.9525e-05	-0.131467	0.00240316	0.1	0.186	1	0
ENSMUSG00000050069	Grem2	0.000602867	0.000600732	-0.116593	0.0101005	0.051	0.123	1	0
ENSMUSG00000039059	Hrh3	0.000603794	0.000103525	0.138421	0.00434103	0.193	0.105	1	0
ENSMUSG00000039131	Gipc2	0.000614547	0.00072738	-0.16245	0.0143013	0.1155	0.207	1	0
ENSMUSG00000034285	Nipsnap1	0.000630346	0.00056716	-0.130391	0.0144703	0.096	0.184	1	0
ENSMUSG00000040661	Rad54l2	0.000636159	0.000858884	-0.122861	0.0286039	0.1045	0.202	0.858091	0.20069
ENSMUSG00000047921	Trappc9	0.000638258	0.000309818	-0.137373	0.00643623	0.2075	0.32	1	0	SFARI					2	0
ENSMUSG00000039842	Mcph1	0.000643686	0.000169603	-0.112968	0.00461602	0.135	0.234	1	0	SFARI					2	0
ENSMUSG00000002688	Prkd1	0.000648092	0.000132081	-0.196587	0.011105	0.6285	0.745	1	0	SFARI						1
ENSMUSG00000096054	Syne1	0.000656862	0.000840537	-0.172335	0.0298228	0.9395	0.971	1	0	SFARI					2	1
ENSMUSG00000006058	Snf8	0.000663993	0.000639997	-0.100148	0.0124257	0.064	0.142	1	0
ENSMUSG00000038533	Cbfa2t2	0.000664644	0.000851526	-0.139715	0.0177764	0.265	0.394	1	0
ENSMUSG00000004207	Psap	0.000675643	0.000558656	0.226166	0.0195248	0.4305	0.333	1	0
ENSMUSG00000022043	Trim35	0.000682182	0.000614111	-0.153829	0.0195674	0.3545	0.488	1	0
ENSMUSG00000021831	Ero1a	0.000690956	0.000663592	-0.123324	0.011821	0.1205	0.215	1	0
ENSMUSG00000024785	Rcl1	0.000719175	0.000451681	-0.114249	0.00250957	0.063	0.136	1	0
ENSMUSG00000029110	Rnf4	0.000725064	0.00019926	-0.103932	0	0.08	0.16	1	0
ENSMUSG00000029640	Usp12	0.000754105	0.000467953	-0.10792	0.00495214	0.076	0.155	1	0
ENSMUSG00000030096	Slc6a6	0.000756154	0.000361424	-0.147074	0.00951926	0.451	0.591	1	0
ENSMUSG00000062991	Nrg1	0.000765056	0.00107616	-0.151782	0.039004	1	1	0.550842	0.635205
ENSMUSG00000062232	Rapgef2	0.000770176	8.80241e-05	-0.124903	0	0.361	0.493	1	0
ENSMUSG00000062590	Armc9	0.000776326	0.000378797	-0.185326	0.00787756	0.274	0.383	1	0
ENSMUSG00000063531	Sema3e	0.000785531	0.000418488	-0.27843	0.0202323	0.37	0.483	1	0
ENSMUSG00000019990	Pde7b	0.000791404	0.00102465	-0.21018	0.0346095	0.971	0.992	1	0
ENSMUSG00000032425	Zfp949	0.000798876	7.97171e-05	-0.104974	0.00481199	0.1	0.186	1	0
ENSMUSG00000067942	Zfp160	0.000801947	0.00102333	-0.115933	0.0173119	0.079	0.163	1	0
ENSMUSG00000063600	Egfem1	0.000808255	0.00111682	0.359466	0.0428493	0.5655	0.467	0.730275	0.381449
ENSMUSG00000024081	Cebpz	0.000818801	0.000323201	-0.141086	0.00855468	0.2005	0.31	1	0
ENSMUSG00000028496	Mllt3	0.000830673	0.000875431	-0.208449	0.0268615	0.655	0.756	1	0
ENSMUSG00000056258	Kcnq3	0.000842883	0.00119045	-0.230161	0.0763884	0.8595	0.929	0.513779	0.68762	SFARI;EAGLE;TADA	0.00084541	Moderate	11.1	Discordant	1	0
ENSMUSG00000020719	Ddx5	0.000847769	0.00111301	0.181828	0.0151626	0.9935	0.969	1	0
ENSMUSG00000029776	Hibadh	0.00084865	0.00118682	-0.134875	0.040811	0.1495	0.262	0.617247	0.541294
ENSMUSG00000034858	Fam214a	0.000859363	0.00119728	-0.162729	0.0668244	0.3085	0.444	0.658385	0.483116
ENSMUSG00000021715	Cwc27	0.000859564	0.000795836	-0.152022	0.0103991	0.226	0.339	1	0
ENSMUSG00000028577	Plaa	0.000865417	0.000995935	-0.106237	0.0167829	0.101	0.192	1	0
ENSMUSG00000042700	Sipa1l1	0.000867587	0.000234167	-0.16244	0.010026	0.932	0.963	1	0
ENSMUSG00000101621	Gm28905	0.000907487	0.000239173	-0.226642	0.008842	0.639	0.748	1	0
ENSMUSG00000027201	Myef2	0.000953684	9.59242e-05	-0.167213	0.00450393	0.507	0.638	1	0
ENSMUSG00000041846	Ppp4r3a	0.00096689	0.00116566	-0.153846	0.0227396	0.2385	0.354	1	0
ENSMUSG00000097277	2900076A07Rik	0.00097109	0.000931628	-0.0977526	0.00953408	0.1025	0.192	1	0
ENSMUSG00000062296	Trank1	0.000973633	0.000642084	-0.150447	0.0119689	0.853	0.927	1	0
ENSMUSG00000042766	Trim46	0.000978471	0.0010814	-0.198113	0.0283128	0.323	0.433	1	0
ENSMUSG00000035202	Lars2	0.000982293	0.00115154	0.246	0.0379883	0.572	0.493	1	0
ENSMUSG00000030768	Disp1	0.000984358	0	-0.0860025	0	0.06	0.131	1	0
ENSMUSG00000020530	Ggnbp2	0.000984981	6.44287e-05	-0.148833	0.0112724	0.327	0.449	1	0	SFARI					2	0
ENSMUSG00000056222	Spock1	0.000987488	0.000571004	-0.162411	0.0103685	0.6245	0.753	1	0
ENSMUSG00000017686	Rhot1	0.000995516	0.000577467	-0.13544	0.0107952	0.189	0.294	1	0
ENSMUSG00000019699	Akt3	0.000998891	0.00108514	-0.191726	0.0199642	0.8205	0.903	1	0
ENSMUSG00000033083	Tbc1d4	0.00100851	0.000132758	-0.168418	0.0107952	0.1905	0.289	1	0
ENSMUSG00000039753	Fbxl5	0.00103139	0.000825146	-0.144573	0.00180716	0.348	0.472	1	0
ENSMUSG00000057329	Bcl2	0.00106342	0.000151062	-0.172088	0.0078322	0.2495	0.357	1	0
ENSMUSG00000024491	Rbm27	0.00108363	0.0012326	-0.171064	0.0183401	0.152	0.247	1	0	SFARI					2	0
ENSMUSG00000019923	Zwint	0.00108677	0.00123271	0.239366	0.0240044	0.4435	0.354	1	0
ENSMUSG00000050711	Scg2	0.0010976	0.000500701	0.209804	0.00198664	0.209	0.123	1	0
ENSMUSG00000029420	Rimbp2	0.00109908	0.00112695	-0.123472	0.0250661	0.4015	0.549	1	0
ENSMUSG00000019996	Map7	0.00111348	0.00149748	-0.184699	0.0317167	0.369	0.493	1	0
ENSMUSG00000041624	Gucy1a2	0.00113139	0.00141968	-0.187136	0.0385914	0.6435	0.769	1	0	SFARI					2	0
ENSMUSG00000028080	Lrba	0.00113251	0.00111876	-0.186853	0.0179225	0.776	0.871	1	0	SFARI					2	0
ENSMUSG00000023965	Fbxl17	0.00116619	0.000345245	-0.152808	0.00565176	0.7715	0.858	1	0
ENSMUSG00000034310	Tmem132d	0.00116647	0	-0.175284	0	0.079	0.152	1	0
ENSMUSG00000070565	Rasal2	0.00116677	0.00132258	-0.223058	0.0200612	0.6035	0.74	1	0
ENSMUSG00000028410	Dnaja1	0.00118594	0.00057898	0.198175	0.0172325	0.387	0.289	1	0
ENSMUSG00000029657	Hsph1	0.00119538	0.000744546	0.204132	0.00708433	0.369	0.273	1	0
ENSMUSG00000003119	Cdk12	0.00121582	0.000617143	-0.176371	0.0117034	0.2875	0.402	1	0
ENSMUSG00000028149	Rap1gds1	0.00124878	0.000622825	-0.139782	0.0149413	0.403	0.543	1	0
ENSMUSG00000020184	Mdm2	0.00127204	0.00169028	-0.136902	0.0240044	0.176	0.286	1	0
ENSMUSG00000004865	Srpk1	0.00127702	0.000139388	-0.129596	0.0108526	0.3265	0.454	1	0
ENSMUSG00000031997	Trpc6	0.00130229	0.00177663	-0.121601	0.0270089	0.0785	0.163	1	0	SFARI;EAGLE		Moderate	7.2	Concordant	2	0
ENSMUSG00000087473	Gm13883	0.00130824	0.000725329	-0.117357	0	0.076	0.15	1	0
ENSMUSG00000074024	4632427E13Rik	0.00131152	0.0015632	-0.154139	0.0246323	0.2585	0.373	1	0
ENSMUSG00000028184	Adgrl2	0.00132227	0.000643134	-0.192923	0.0102675	0.488	0.612	1	0
ENSMUSG00000040896	Kcnd3	0.00133104	0.000132308	-0.140792	0	0.198	0.302	1	0	SFARI					2	0
ENSMUSG00000032382	Snx1	0.00133111	0.00113703	-0.107676	0.0143684	0.106	0.192	1	0
ENSMUSG00000116564	Riok2	0.0013317	0.00161507	-0.108216	0.01261	0.0615	0.134	1	0
ENSMUSG00000073073	Gm8098	0.00133345	0.00117795	-0.135566	0.0131069	0.1875	0.289	1	0
ENSMUSG00000006599	Gtf2h1	0.00133378	0.000604559	-0.111031	0	0.0995	0.181	1	0
ENSMUSG00000029651	Mtus2	0.00134084	0.00101335	-0.195442	0.00875662	0.3895	0.499	1	0
ENSMUSG00000040594	Ranbp17	0.00135067	0.000948471	-0.151228	0.00739235	0.323	0.441	1	0	SFARI					2	0
ENSMUSG00000050587	Lrrc4c	0.00139632	0.000547964	0.209432	0.00613415	0.987	0.995	1	0	SFARI;EAGLE		Limited	1.25	Discordant	1	0
ENSMUSG00000085845	Gm13944	0.00139667	0.00068871	-0.104578	0.0165113	0.1065	0.192	1	0
ENSMUSG00000032020	Ubash3b	0.00140851	0.000824483	-0.170298	0.00912883	0.1205	0.205	1	0
ENSMUSG00000049878	Rlf	0.00141224	0.00173841	-0.127196	0.0316511	0.223	0.339	1	0
ENSMUSG00000053768	Chchd3	0.00143027	2.19916e-05	-0.157475	0.0105351	0.3765	0.491	1	0
ENSMUSG00000044667	Plppr4	0.00143368	0.00183173	0.206537	0.0247533	0.8165	0.769	1	0
ENSMUSG00000110834	Gm39469	0.00143955	0.0010801	-0.087564	0.00240883	0.093	0.173	1	0
ENSMUSG00000025290	Rps24	0.00146549	0.000955972	0.121326	0.00676338	0.156	0.081	1	0
ENSMUSG00000039860	Srrm3	0.00147203	0.000510086	-0.146021	0.0123655	0.3755	0.499	1	0
ENSMUSG00000054843	Atrnl1	0.00149006	0.000641	-0.187018	0.00366737	0.63	0.727	1	0
ENSMUSG00000029775	Klhdc10	0.00150238	0.00108197	-0.165618	0.0292883	0.294	0.402	1	0
ENSMUSG00000114401	Gm38604	0.00154315	0.0014481	-0.122243	0.0076225	0.051	0.115	1	0
ENSMUSG00000040123	Zmym5	0.00154497	0.000148925	-0.10251	0.00217746	0.185	0.289	1	0
ENSMUSG00000026659	Dusp12	0.00155988	0.000637643	-0.0815455	0.00948974	0.0985	0.181	1	0
ENSMUSG00000024639	Gnaq	0.00156436	0.00148748	-0.122031	0.0078292	0.4345	0.572	1	0
ENSMUSG00000020151	Ptprr	0.00159372	0.00177671	-0.132553	0.0110286	0.1665	0.265	1	0
ENSMUSG00000029757	Dync1i1	0.00160652	0.000698233	-0.135915	0.00959687	0.294	0.407	1	0
ENSMUSG00000019856	Fam184a	0.00163027	0.00090434	-0.11386	0.0152262	0.2965	0.417	1	0
ENSMUSG00000050511	Oprd1	0.00163361	0.000569998	-0.114621	0.00224948	0.1545	0.247	1	0
ENSMUSG00000029136	Rbks	0.0016459	0.00202459	-0.107509	0.0225316	0.0645	0.136	1	0
ENSMUSG00000035305	Ror1	0.00164868	0.00200085	-0.168211	0.0188223	0.269	0.388	1	0
ENSMUSG00000029173	Sepsecs	0.00165152	0.00114175	-0.0906383	0.00508799	0.0495	0.113	1	0
ENSMUSG00000002489	Tiam1	0.00166784	0.00172872	-0.161039	0.0227792	0.4105	0.533	1	0
ENSMUSG00000047193	Dync2h1	0.00172418	0.00139282	-0.119002	0.00381361	0.2875	0.412	1	0
ENSMUSG00000037266	Rsrp1	0.00173078	0.000533105	-0.134847	0.00165205	0.4175	0.535	1	0
ENSMUSG00000030471	Zdhhc13	0.00173651	0.00182836	-0.0955398	0.0171456	0.0865	0.165	1	0
ENSMUSG00000020993	Trappc6b	0.00175806	0.000556951	-0.0965255	0.0235066	0.1115	0.194	1	0	SFARI						1
ENSMUSG00000052921	Arhgef15	0.00177895	0.000683495	-0.0892685	0.00255354	0.0435	0.102	1	0
ENSMUSG00000090015	Gm15446	0.00177973	0.00123861	-0.0893556	0.010026	0.063	0.131	1	0
ENSMUSG00000061455	Stx17	0.0018063	0.000204408	-0.0812856	0.00754731	0.058	0.123	1	0
ENSMUSG00000036298	Slc2a13	0.00180672	0.00224506	-0.236924	0.0154755	0.7785	0.892	1	0
ENSMUSG00000032178	Ilf3	0.00183402	0.000911929	-0.133708	0.00421546	0.232	0.336	1	0
ENSMUSG00000106407	Gm43439	0.00184669	6.52108e-05	-0.0824633	0.00255354	0.047	0.108	1	0
ENSMUSG00000053963	Stum	0.0018502	0.00203444	0.106516	0.0115271	0.1365	0.066	1	0
ENSMUSG00000028414	Fktn	0.00186073	0	-0.100694	0	0.084	0.157	1	0
ENSMUSG00000054823	Nsd3	0.00187795	0.00135144	-0.131773	0.00156104	0.4475	0.583	1	0
ENSMUSG00000035696	Rnf38	0.00188435	0.00167841	-0.095056	0.0130232	0.176	0.278	1	0	SFARI					2	0
ENSMUSG00000087431	Gm16054	0.00189207	0.00168624	-0.0909048	0.00751026	0.059	0.126	1	0
ENSMUSG00000037624	Kcnk2	0.00189954	0.00193207	-0.223597	0.0221778	0.731	0.808	1	0
ENSMUSG00000038876	Rnf146	0.00192058	0.00189336	-0.0790757	0.0127679	0.046	0.108	1	0
ENSMUSG00000029822	Osbpl3	0.00192808	0.00172063	-0.144899	0.0140989	0.248	0.354	1	0
ENSMUSG00000040339	Fam102b	0.00194452	0.00148481	-0.13059	0.0191083	0.219	0.318	1	0
ENSMUSG00000021218	Gdi2	0.00194625	0.000283523	-0.121107	0.00940227	0.1245	0.207	1	0
ENSMUSG00000032405	Pias1	0.0019518	0.00142252	-0.164853	0.021831	0.4105	0.522	1	0
ENSMUSG00000024357	Sil1	0.00196648	0.00242694	-0.137861	0.0240516	0.264	0.378	1	0
ENSMUSG00000001150	Mcm3ap	0.00196841	0.00052836	-0.114276	0.00442577	0.1745	0.27	1	0
ENSMUSG00000075706	Gpx4	0.00197612	0.0021347	0.138368	0.0197665	0.176	0.097	1	0
ENSMUSG00000085396	Firre	0.00197935	0.000230055	-0.13803	0	0.2585	0.365	1	0
ENSMUSG00000016493	Cd46	0.0019838	0.000230485	-0.105562	0.00673362	0.168	0.262	1	0
ENSMUSG00000022389	Tef	0.00201205	0.00187769	-0.160184	0.0123905	0.247	0.349	1	0
ENSMUSG00000021254	Gpatch2l	0.00205987	0.00284924	-0.0913687	0.020506	0.038	0.102	1	0
ENSMUSG00000020528	Prpsap2	0.00206697	0.00207148	-0.0981513	0.00990434	0.0785	0.152	1	0
ENSMUSG00000010608	Rbm25	0.00207649	0.0021585	-0.151108	0.0296143	0.5105	0.635	1	0
ENSMUSG00000029673	Auts2	0.00209755	0.00293567	-0.146106	0.0419496	1	0.997	0.769644	0.325773	SFARI;EAGLE;TADA	0.0046251	Definitive	35.5	Concordant	1	0
ENSMUSG00000035885	Cox8a	0.00211981	0.00253111	0.22524	0.0417122	0.369	0.27	1	0
ENSMUSG00000035614	Togaram1	0.00216411	0.00219341	-0.118926	0.0181273	0.2415	0.36	1	0
ENSMUSG00000044835	Ankrd45	0.00227626	0.00119551	-0.114325	0.00710901	0.1205	0.202	1	0
ENSMUSG00000093387	Gm20732	0.0022784	0.0001779	-0.0969041	0.0112475	0.1455	0.239	1	0
ENSMUSG00000034501	Pcnx4	0.00229924	0.00270548	-0.112083	0.0145391	0.0945	0.173	1	0
ENSMUSG00000024370	Cdc23	0.00230383	0.00290586	-0.114988	0.0145046	0.096	0.176	1	0
ENSMUSG00000039531	Zup1	0.00230843	0.00149168	-0.14913	0.0160295	0.1525	0.239	1	0
ENSMUSG00000026028	Trak2	0.00231367	0.00172571	-0.100799	0.00726081	0.088	0.163	1	0
ENSMUSG00000030067	Foxp1	0.00231843	0.0023957	-0.149393	0.028241	0.986	0.995	1	0	SFARI;EAGLE;TADA	0	Definitive	60.45	Concordant	1	1
ENSMUSG00000026322	Htr4	0.00231943	0.00194882	-0.178527	0.0225568	0.2075	0.304	1	0
ENSMUSG00000000378	Ccm2	0.00233235	0.00235599	-0.131581	0.00642272	0.2085	0.307	1	0
ENSMUSG00000074925	Ptar1	0.00233469	0.000842673	-0.092435	0.00254717	0.0485	0.108	1	0
ENSMUSG00000026504	Sdccag8	0.00234876	0.00128353	-0.114478	0.019581	0.2715	0.381	1	0
ENSMUSG00000039428	Tmem135	0.00235416	0.000485707	-0.142867	0.00758471	0.3255	0.433	1	0
ENSMUSG00000066839	Ecsit	0.00235902	0.00168915	-0.0954149	0.00709254	0.109	0.192	1	0
ENSMUSG00000021431	Snrnp48	0.00240421	0.00112464	-0.109505	0.00233175	0.126	0.21	1	0
ENSMUSG00000036782	Klhl13	0.00242725	0.00331003	-0.13044	0.0549439	0.2555	0.378	1	0
ENSMUSG00000050697	Prkaa1	0.00245338	8.61147e-05	-0.0854546	0.00254082	0.052	0.113	1	0
ENSMUSG00000030092	Cntn6	0.00245766	0.00212137	-0.12317	0.0238292	0.4685	0.593	1	0	SFARI					2	0
ENSMUSG00000036751	Cox6b1	0.0025008	0.00203271	0.167028	0.0180916	0.252	0.165	1	0
ENSMUSG00000032985	5730522E02Rik	0.00250847	0.000253222	-0.170862	0.00489276	0.874	0.921	1	0
ENSMUSG00000041132	N4bp2l1	0.00252069	0.00280604	-0.10866	0.0145046	0.0905	0.168	1	0
ENSMUSG00000035964	Tmem59l	0.00252885	0.00107229	0.108869	0.00449401	0.168	0.094	1	0
ENSMUSG00000010914	Pdhx	0.00253251	0.0033752	-0.121418	0.0176543	0.0615	0.131	1	0
ENSMUSG00000036104	Rab3gap1	0.00253725	0.00301156	-0.136887	0.0359702	0.4265	0.551	1	0
ENSMUSG00000004789	Dlst	0.00254353	0.00215555	-0.111726	0.0071422	0.118	0.199	1	0
ENSMUSG00000097545	Mir124a-1hg	0.00255405	0.00344967	0.227755	0.0426258	0.709	0.654	1	0
ENSMUSG00000024991	Eif3a	0.00256339	1.711e-05	-0.104515	0.00215903	0.197	0.297	1	0
ENSMUSG00000025019	Lcor	0.00257909	0.00117868	-0.136068	0.0130163	0.4225	0.546	1	0
ENSMUSG00000061518	Cox5b	0.00258594	0.00137645	0.198169	0.00565176	0.293	0.205	1	0
ENSMUSG00000036955	Kifbp	0.00259481	0.00143167	-0.110392	0.00491634	0.084	0.155	1	0
ENSMUSG00000061298	Agbl4	0.00261202	0.00301484	-0.159369	0.0522399	0.3475	0.465	1	0	SFARI					2	0
ENSMUSG00000026620	Mark1	0.0026145	0.0016321	-0.145995	0.0117427	0.538	0.64	1	0	SFARI					2	0
ENSMUSG00000017778	Cox7c	0.00264951	0.00309026	0.166232	0.020506	0.4015	0.297	1	0
ENSMUSG00000033671	Cep350	0.00264954	0.000746811	-0.154877	0.0140711	0.269	0.367	1	0
ENSMUSG00000085440	Sorbs2os	0.00266602	0.00283442	-0.120563	0.0185148	0.328	0.444	1	0
ENSMUSG00000018001	Cyth3	0.00266699	0.00073937	-0.0880792	0	0.067	0.134	1	0
ENSMUSG00000022863	Btg3	0.00267942	0.000216335	-0.0946107	0.00242602	0.092	0.165	1	0
ENSMUSG00000020721	Helz	0.00269303	0.00108655	-0.119301	0.00351773	0.357	0.478	1	0
ENSMUSG00000004383	Large1	0.00269972	0.00115694	-0.126854	0.0148783	0.7715	0.832	1	0
ENSMUSG00000074505	Fat3	0.00271604	0.00361137	-0.170776	0.044219	0.844	0.934	1	0
ENSMUSG00000045441	Gprin3	0.00272525	0.00364144	-0.222035	0.0756005	0.626	0.724	1	0
ENSMUSG00000003970	Rpl8	0.00273658	0.000520796	0.106538	0.0023054	0.143	0.076	1	0
ENSMUSG00000040524	Zfp609	0.00274027	0.00293172	-0.119684	0.020422	0.3205	0.441	1	0
ENSMUSG00000030209	Grin2b	0.00274339	0.000724374	-0.0869306	0	0.996	0.995	1	0	SFARI;EAGLE;TADA	2.49e-09	Definitive	29.65	Concordant	1	0
ENSMUSG00000028156	Eif4e	0.00277881	0.00293116	-0.137155	0.0192687	0.2125	0.31	1	0	SFARI;EAGLE;TADA	0.0790774	Limited	3.6	Discordant	2	0
ENSMUSG00000030505	Prmt3	0.00278001	0.00170255	-0.0911647	0.0098565	0.0735	0.142	1	0
ENSMUSG00000061244	Exoc5	0.00278146	0.00218965	-0.122045	0.00989474	0.2625	0.367	1	0	SFARI					2	0
ENSMUSG00000035173	Ccdc186	0.00278912	0.000879854	-0.103217	0.00488106	0.0905	0.163	1	0
ENSMUSG00000111627	Gm48749	0.00281329	0.001748	-0.142123	0.0065324	0.1785	0.268	1	0
ENSMUSG00000033278	Ptprm	0.00281389	0.00311635	-0.198612	0.0290357	0.571	0.68	1	0
ENSMUSG00000024897	Apba1	0.00281478	0.00103767	-0.121679	0.00233175	0.1285	0.21	1	0
ENSMUSG00000000740	Rpl13	0.00281823	0.000732537	0.146396	0.0142111	0.256	0.171	1	0
ENSMUSG00000024661	Fth1	0.00282037	0.00375881	0.245928	0.0366756	0.377	0.283	1	0
ENSMUSG00000038039	Gcc2	0.00283715	0.00320018	-0.133491	0.0168274	0.2255	0.325	1	0
ENSMUSG00000037965	Zc3h7a	0.00284325	0.0015742	-0.118254	0.0180206	0.2705	0.373	1	0
ENSMUSG00000021846	Peli2	0.0028749	0.00384433	-0.131304	0.0372427	0.265	0.386	1	0
ENSMUSG00000026289	Atg16l1	0.00288678	0.00212701	-0.113105	0	0.2835	0.388	1	0
ENSMUSG00000042323	Pbrm1	0.00293811	0.00233228	-0.160983	0.00963312	0.315	0.417	1	0
ENSMUSG00000032386	Trip4	0.00296164	0.000491773	-0.127132	0.00226446	0.1585	0.244	1	0
ENSMUSG00000024556	Me2	0.00300991	0.00365396	-0.182378	0.0208199	0.2245	0.323	1	0
ENSMUSG00000047368	Abhd17b	0.00305917	0.0025367	-0.120504	0.00710901	0.118	0.197	1	0
ENSMUSG00000025323	Sp4	0.00308406	0.00179862	-0.141261	0.0133937	0.1735	0.26	1	0
ENSMUSG00000047036	Zfp445	0.00308478	0.000324385	-0.0960218	0.00911659	0.3415	0.462	1	0
ENSMUSG00000022564	Grina	0.003107	0.000728828	0.20197	0	0.462	0.381	1	0
ENSMUSG00000021027	Ralgapa1	0.00312381	0.00316427	-0.133582	0.0214774	0.668	0.785	1	0
ENSMUSG00000024759	Atl3	0.00316722	9.4621e-06	-0.107871	0.00236417	0.118	0.197	1	0
ENSMUSG00000079564	Gm11149	0.00318629	0.000132744	-0.0876715	0.00491634	0.079	0.147	1	0
ENSMUSG00000024843	Chka	0.00319466	0.000592452	-0.150141	0.00188044	0.331	0.438	1	0
ENSMUSG00000024073	Birc6	0.00319996	0.00423424	-0.129124	0.0303816	0.625	0.782	1	0	SFARI					2	0
ENSMUSG00000041308	Sntb2	0.00322191	0.00232656	-0.125556	0.0363447	0.3625	0.472	1	0
ENSMUSG00000028613	Lrp8	0.00325168	0.00229063	-0.0720281	0.00764153	0.0475	0.105	1	0
ENSMUSG00000023026	Dip2b	0.00325228	0.00174592	-0.143402	0.00520038	0.374	0.486	1	0
ENSMUSG00000031517	Gpm6a	0.00325774	0.00368725	0.21168	0.0135648	0.8465	0.835	1	0
ENSMUSG00000045098	Kmt5b	0.00326303	0.00278622	-0.136923	0.0230195	0.2375	0.333	1	0	SFARI;EAGLE;TADA	0	Definitive	14.05	Concordant	1	0
ENSMUSG00000024045	Akap8	0.00326886	0.00078535	-0.11549	0.00850121	0.228	0.325	1	0
ENSMUSG00000024908	Ppp6r3	0.00328388	0.00222922	-0.123142	0.0165208	0.243	0.344	1	0
ENSMUSG00000117286	Gm1043	0.00328801	0.00455264	-0.149658	0.0401925	0.479	0.604	1	0
ENSMUSG00000039242	B3galnt2	0.00335151	0.00047807	-0.10668	0.00233709	0.1275	0.207	1	0
ENSMUSG00000020628	Trappc12	0.00343484	0.00186852	-0.0973678	0	0.148	0.234	1	0
ENSMUSG00000033730	Egr3	0.00344826	0.00255847	0.24746	0.0308119	0.273	0.186	1	0	SFARI					2	0
ENSMUSG00000024487	Yipf5	0.00345324	0.0026307	-0.10437	0.0139112	0.127	0.21	1	0
ENSMUSG00000080717	B230307C23Rik	0.00346584	0.00220779	-0.0810911	0.00752874	0.063	0.126	1	0
ENSMUSG00000032076	Cadm1	0.00349214	0.000912102	0.280192	0.00869031	0.6535	0.572	1	0	SFARI					2	0
ENSMUSG00000020598	Nrcam	0.00352897	0.000664325	-0.160231	0.00380413	0.6195	0.743	1	0	SFARI					2	0
ENSMUSG00000049184	Purg	0.00355024	0.00173913	-0.122565	0.00841357	0.227	0.323	1	0
ENSMUSG00000039218	Srrm2	0.00355522	0.00140895	0.171433	0.00170592	0.8465	0.827	1	0	SFARI					2	1
ENSMUSG00000027827	Kcnab1	0.00362279	0.00132998	-0.171577	0.00403856	0.9775	0.995	1	0
ENSMUSG00000045411	2410002F23Rik	0.00362962	0.00239921	-0.0736452	0.00508799	0.0495	0.108	1	0
ENSMUSG00000024251	Thada	0.00364861	0.00045882	-0.156635	0.00218679	0.1955	0.278	1	0
ENSMUSG00000032621	Srek1	0.00368153	0.00334393	-0.137529	0.0253215	0.5905	0.709	1	0
ENSMUSG00000032330	Cox7a2	0.00372956	0.00239604	0.163772	0.0202818	0.2375	0.157	1	0
ENSMUSG00000028975	Pex14	0.00378082	0.0034568	-0.0959006	0.00966964	0.0945	0.168	1	0
ENSMUSG00000087177	E130307A14Rik	0.00378426	0.000558672	-0.135443	0.0133853	0.306	0.409	1	0
ENSMUSG00000020163	Uqcr11	0.00379366	0.00142326	0.116773	0.00440666	0.181	0.108	1	0
ENSMUSG00000027782	Kpna4	0.00385872	0.00485462	-0.122025	0.0334502	0.2165	0.32	1	0
ENSMUSG00000078429	Ctdsp2	0.00386961	0.00428496	-0.103714	0.0184229	0.144	0.231	1	0
ENSMUSG00000024969	Mark2	0.00396151	0.00505141	-0.123097	0.0341831	0.596	0.732	1	0	SFARI;TADA	1.2e-05				2	0
ENSMUSG00000034157	Cipc	0.00399274	0.00143197	-0.123533	0.00424175	0.2285	0.323	1	0
ENSMUSG00000052139	Babam2	0.0040018	0.00124497	-0.13808	0.00875662	0.371	0.483	1	0
ENSMUSG00000031644	Nek1	0.00405443	0.000905096	-0.132929	0.00203013	0.2505	0.346	1	0
ENSMUSG00000006527	Sfmbt1	0.00407731	0.000368837	-0.0969492	0.00457462	0.134	0.215	1	0
ENSMUSG00000098274	Rpl24	0.00408458	0.00144604	0.0977368	0	0.181	0.108	1	0
ENSMUSG00000014294	Ndufa2	0.00409291	0.000907945	0.104662	0	0.1405	0.076	1	0
ENSMUSG00000079056	Kcnip3	0.00409846	0.00143869	-0.104237	0.00203824	0.232	0.333	1	0
ENSMUSG00000022790	Igsf11	0.00417133	0.00275588	-0.12875	0.0158656	0.4395	0.554	1	0
ENSMUSG00000039278	Pcsk1n	0.00418441	0.00207648	0.182184	0.0105247	0.478	0.399	1	0
ENSMUSG00000032449	Slc25a36	0.00419871	0.00518806	-0.117235	0.0258823	0.1875	0.286	1	0
ENSMUSG00000002210	Smg9	0.00420924	0.000139727	-0.0747148	0.00252198	0.055	0.113	1	0
ENSMUSG00000049606	Zfp644	0.00422142	0.00154059	-0.117564	0.00674847	0.1705	0.255	1	0
ENSMUSG00000033610	Pank1	0.00423724	0.00214577	-0.0822712	0.00244345	0.0815	0.15	1	0
ENSMUSG00000033632	AW554918	0.00424287	0.005565	-0.133203	0.0257192	0.2115	0.312	1	0
ENSMUSG00000032827	Ppp1r9a	0.00424999	0.000182227	-0.129684	0.00247607	0.924	0.955	1	0
ENSMUSG00000086614	Gm14330	0.00425976	0.00541644	-0.10338	0.0151509	0.058	0.121	1	0
ENSMUSG00000118401	Gpr52	0.00426159	0.00420177	-0.114597	0.011876	0.122	0.199	1	0
ENSMUSG00000022892	App	0.00428347	0.00125552	0.16741	0.00251163	0.8415	0.824	1	0
ENSMUSG00000026155	Smap1	0.00429656	0.0047324	-0.129033	0.0266584	0.24	0.341	1	0
ENSMUSG00000033948	Zswim5	0.00433616	0.00436543	-0.159076	0.0271601	0.395	0.504	1	0
ENSMUSG00000002845	Tmem39a	0.0043481	0.00547974	-0.0936353	0.0223669	0.071	0.139	1	0
ENSMUSG00000022807	Osbpl11	0.00435782	0.00387068	-0.0902156	0.0101255	0.056	0.115	1	0
ENSMUSG00000004961	Syt5	0.00436679	0.00194889	0.144086	0.00404016	0.2585	0.176	1	0
ENSMUSG00000021270	Hsp90aa1	0.00437627	0.0051284	0.228376	0.0224922	0.4005	0.318	1	0
ENSMUSG00000042680	Garem1	0.00439886	0.00164721	-0.149966	0.00432569	0.484	0.609	1	0
ENSMUSG00000053626	Tll1	0.00440016	0.0036279	-0.110562	0.0045139	0.11	0.189	1	0
ENSMUSG00000003279	Dlgap1	0.00441802	0.00408941	-0.176746	0.0100507	0.743	0.848	1	0	SFARI					2	0
ENSMUSG00000041245	Wnk3	0.00442503	0.00251885	-0.110747	0.0117937	0.1235	0.199	1	0	SFARI					2	0
ENSMUSG00000043441	Gpr149	0.00442623	0.00196607	-0.116316	0.0190241	0.0905	0.16	1	0
ENSMUSG00000000861	Bcl11a	0.00444499	0.00512228	-0.137173	0.0229623	0.4055	0.535	1	0	SFARI;EAGLE;TADA	0.00044409	Moderate	9.15	Discordant	1	1
ENSMUSG00000028677	Rnf220	0.00445176	0.00133403	0.140264	0.00651849	0.1875	0.118	1	0
ENSMUSG00000037750	Fam222b	0.00447082	0.00370965	-0.115094	0.0211655	0.211	0.307	1	0
ENSMUSG00000058656	Samd12	0.00449911	0.00454398	-0.167991	0.0261049	0.8135	0.879	1	0
ENSMUSG00000017740	Slc12a5	0.00450206	0.000278523	0.178359	0.0232742	0.492	0.396	1	0	SFARI					2	0
ENSMUSG00000031778	Cx3cl1	0.00450488	0.00397224	0.160793	0.0187187	0.504	0.415	1	0
ENSMUSG00000036840	Siah1a	0.00453147	0.00563675	-0.0844027	0.0168622	0.096	0.173	1	0
ENSMUSG00000043531	Sorcs1	0.00453865	0.000895173	-0.171959	0.00595994	0.6875	0.782	1	0	EAGLE		Limited	0.25	Discordant
ENSMUSG00000022387	Brd1	0.00454392	0.00317312	-0.111952	0.00866366	0.202	0.294	1	0
ENSMUSG00000049680	Urgcp	0.00456206	0.00602579	-0.130741	0.0300694	0.206	0.307	1	0
ENSMUSG00000062110	Scfd2	0.00459507	0.000337952	-0.106918	0.00413012	0.226	0.32	1	0	SFARI					2	0
ENSMUSG00000027708	Dcun1d1	0.0045953	0.00520536	-0.127874	0.01521	0.2025	0.294	1	0
ENSMUSG00000025262	Fam120c	0.00461449	0.00228218	-0.13029	0.00550932	0.3385	0.441	1	0
ENSMUSG00000001175	Calm1	0.0046266	0.00395939	0.272103	0.0222926	0.5945	0.541	1	0
ENSMUSG00000026484	Rnf2	0.00462662	0.0001591	-0.065829	0.00501298	0.055	0.113	1	0
ENSMUSG00000044452	Zfp507	0.00466662	0.00478561	-0.0846446	0.00754731	0.0575	0.118	1	0
ENSMUSG00000029108	Pcdh7	0.00467079	0.00054468	-0.161988	0.00157429	0.723	0.814	1	0
ENSMUSG00000025508	Rplp2	0.00468301	0.00266374	0.147346	0.0126465	0.211	0.136	1	0
ENSMUSG00000039210	Gpatch2	0.00469702	0.00242527	-0.114222	0.00933773	0.1335	0.21	1	0
ENSMUSG00000028344	Invs	0.00469762	0.00114181	-0.102864	0	0.1035	0.176	1	0
ENSMUSG00000097571	Jpx	0.00470391	0.00481576	-0.0940085	0.022874	0.1355	0.218	1	0
ENSMUSG00000020883	Fbxl20	0.0047301	0.00482289	-0.147625	0.0124409	0.2515	0.346	1	0
ENSMUSG00000035623	Rsf1	0.00474627	0.00640268	-0.178698	0.0418577	0.379	0.496	1	0
ENSMUSG00000028656	Cap1	0.00475511	0.00184762	-0.125571	0.0151415	0.3165	0.412	1	0
ENSMUSG00000031284	Pak3	0.00475585	0.00630482	-0.155973	0.0272053	0.471	0.593	1	0
ENSMUSG00000024383	Map3k2	0.00475878	0.00319066	-0.0975958	0.00751487	0.2965	0.412	1	0
ENSMUSG00000024135	Srbd1	0.0047706	0.0023209	-0.12791	0.0111249	0.168	0.252	1	0
ENSMUSG00000030518	Fam189a1	0.00481398	0.00128114	-0.199022	0.0140711	0.465	0.559	1	0
ENSMUSG00000051451	Crebzf	0.00485666	0.00246204	-0.128129	0.00440666	0.188	0.273	1	0
ENSMUSG00000014195	Dnajc7	0.0048582	0.00675163	-0.127535	0.0484488	0.282	0.402	1	0
ENSMUSG00000027309	Dnaaf9	0.00486267	0.00185198	-0.154563	0.00452391	0.4775	0.588	1	0
ENSMUSG00000058248	Kcnh1	0.00495565	0.00486157	-0.175065	0.00883243	0.3635	0.457	1	0
ENSMUSG00000024983	Vti1a	0.00496319	0.00240407	-0.145693	0.00956388	0.441	0.546	1	0
ENSMUSG00000022052	Ppp2r2a	0.00497195	0.00686282	-0.133909	0.0454987	0.65	0.764	1	0
ENSMUSG00000037579	Kcnh3	0.00499482	0.00649201	-0.107499	0.0298183	0.205	0.307	1	0
ENSMUSG00000073427	Gm4924	0.00500372	0.00317038	-0.0982273	0.00463701	0.13	0.207	1	0
ENSMUSG00000024404	Riok3	0.00503851	0.00581559	-0.12638	0.0217059	0.2025	0.294	1	0
ENSMUSG00000084786	Ubl5	0.00506209	0.00125943	0.139316	0.0107952	0.1875	0.118	1	0
ENSMUSG00000015087	Rabl6	0.00510326	0.00108276	-0.131125	0.00396171	0.286	0.381	1	0
ENSMUSG00000020121	Srgap1	0.00511342	0.0038171	-0.192476	0.0107046	0.6535	0.732	1	0
ENSMUSG00000025269	Apex2	0.00511402	0.00659835	-0.126141	0.025399	0.2245	0.325	1	0
ENSMUSG00000056153	Socs6	0.00511473	0.00104282	-0.111942	0.00433181	0.172	0.257	1	0
ENSMUSG00000051335	Gfod1	0.00518852	0.00574175	-0.144717	0.0339449	0.311	0.415	1	0
ENSMUSG00000042505	Sdhaf3	0.00521882	0.00319304	-0.0720683	0.0049763	0.055	0.113	1	0
ENSMUSG00000036469	Marchf1	0.00522496	0.00560493	0.365884	0.00822035	0.5315	0.457	1	0
ENSMUSG00000059669	Taf1b	0.00524051	0.00336317	-0.0937289	0.00912883	0.1535	0.236	1	0
ENSMUSG00000005882	Uqcc1	0.00525139	0.0051332	-0.0865197	0.0193857	0.092	0.163	1	0
ENSMUSG00000022523	Fgf12	0.00525832	0.000480789	-0.167669	0.000562525	0.9395	0.958	1	0
ENSMUSG00000104597	B230334C09Rik	0.00526362	0.0062424	-0.16469	0.0250134	0.386	0.48	1	0
ENSMUSG00000058444	Map2k5	0.00527335	0.00454573	-0.119667	0.0103779	0.223	0.315	1	0
ENSMUSG00000014498	Ankrd52	0.00532868	0.00161598	-0.104179	0.00492822	0.0855	0.15	1	0
ENSMUSG00000027499	Pkia	0.00544138	0.00499924	-0.146027	0.021365	0.3715	0.467	1	0
ENSMUSG00000024566	Atp9b	0.00546547	0.00439075	-0.115514	0.0144703	0.358	0.472	1	0
ENSMUSG00000111752	Gm38575	0.00547015	0.00700748	-0.0967158	0.0151509	0.0525	0.113	1	0
ENSMUSG00000029276	Glmn	0.00548436	0.00092599	-0.0905672	0.0072095	0.101	0.171	1	0
ENSMUSG00000039601	Rcan2	0.00550629	0.00115159	-0.148725	0.015235	0.6365	0.751	1	0
ENSMUSG00000024548	Setbp1	0.00554715	0.00643471	-0.122902	0.0112369	0.416	0.543	1	0	SFARI					1	0
ENSMUSG00000026361	Cdc73	0.00555447	0.00389997	-0.129793	0.0120018	0.257	0.354	1	0
ENSMUSG00000028573	Fggy	0.00555992	0.00629277	-0.115516	0.0150023	0.0695	0.131	1	0
ENSMUSG00000026103	Gls	0.00559204	0.00728372	-0.138821	0.0513527	0.698	0.801	1	0
ENSMUSG00000029094	Afap1	0.00559639	0.00421223	-0.10353	0.0120443	0.101	0.171	1	0
ENSMUSG00000055239	Kcmf1	0.00561919	0.00445857	-0.0849563	0.0112475	0.152	0.236	1	0
ENSMUSG00000035354	Uvrag	0.00567677	0.00162002	-0.124832	0.0101306	0.26	0.349	1	0
ENSMUSG00000031575	Ash2l	0.00572084	0.00349545	-0.0733815	0.0193397	0.0895	0.157	1	0
ENSMUSG00000032356	Rasgrf1	0.00573611	0.00592999	-0.124661	0.026681	0.512	0.63	1	0
ENSMUSG00000035992	Fnip1	0.00575164	0.00183382	-0.14675	0.0118524	0.4095	0.499	1	0
ENSMUSG00000024346	Pfdn1	0.00578899	0.00340512	-0.0989767	0.00237518	0.117	0.189	1	0
ENSMUSG00000058192	Zfp846	0.0058253	0.00438649	-0.089416	0.00738343	0.08	0.144	1	0
ENSMUSG00000038070	Cntln	0.00584393	0.00399475	-0.130387	0.0123157	0.239	0.331	1	0
ENSMUSG00000040943	Tet2	0.00588038	0.00420107	-0.133832	0.00762725	0.3005	0.399	1	0	SFARI					2	0
ENSMUSG00000006675	P4htm	0.0058875	0.00175512	-0.0722729	0.00668946	0.156	0.241	1	0
ENSMUSG00000038418	Egr1	0.00588766	0.00157939	0.179109	0.0186162	0.2925	0.21	1	0
ENSMUSG00000008763	Man1a2	0.00589655	0.00696796	-0.104637	0.0287382	0.4305	0.556	1	0
ENSMUSG00000037138	Aff3	0.00590554	0.000949421	-0.122703	0.00248109	0.7865	0.89	1	0
ENSMUSG00000066057	Gm1976	0.00596265	0.00633766	-0.139497	0.0180916	0.2715	0.365	1	0
ENSMUSG00000023044	Csad	0.00596589	0.00418422	-0.107414	0.00727808	0.096	0.163	1	0
ENSMUSG00000025782	Taf3	0.00601302	0.000272714	-0.119726	0.0022347	0.163	0.241	1	0
ENSMUSG00000062825	Actg1	0.00601673	0.00666701	0.177985	0.0122804	0.3765	0.291	1	0
ENSMUSG00000026975	Dph7	0.00606348	0.00124492	-0.087877	0.00492822	0.0775	0.139	1	0
ENSMUSG00000035133	Arhgap5	0.0060654	0.00427952	-0.117661	0.0157554	0.273	0.367	1	0	SFARI					2	0
ENSMUSG00000032261	Sh3bgrl2	0.0061439	0.00451512	-0.099197	0.00738343	0.085	0.15	1	0
ENSMUSG00000049800	Sertad2	0.00614623	0.00809112	-0.139046	0.0469528	0.336	0.454	1	0
ENSMUSG00000054309	Cpsf3	0.00616937	0.00538036	-0.105576	0.0112228	0.1695	0.255	1	0
ENSMUSG00000037669	Ldah	0.00617028	0.00432435	-0.101764	0.0139747	0.127	0.202	1	0
ENSMUSG00000071528	Atp5md	0.00623377	0.00550981	0.179032	0.023055	0.2845	0.207	1	0
ENSMUSG00000020863	Luc7l3	0.00623544	0.00625581	-0.108447	0.0262261	0.366	0.486	1	0
ENSMUSG00000016427	Ndufa1	0.00623698	0.00197262	0.122329	0.0107724	0.1965	0.126	1	0
ENSMUSG00000032376	Usp3	0.00630865	0.0025296	-0.140272	0.00661357	0.411	0.512	1	0
ENSMUSG00000034088	Hdlbp	0.00633096	0.00162983	-0.0950378	0	0.2705	0.365	1	0	SFARI;EAGLE		Limited	1.25	Discordant	1	0
ENSMUSG00000035901	Dennd5a	0.00634666	0.000732826	-0.116988	0.00638254	0.218	0.304	1	0
ENSMUSG00000029290	Zfp326	0.00634911	0.00340005	-0.0867768	0.0071589	0.1075	0.178	1	0
ENSMUSG00000085222	Gm13974	0.00635622	0.0028947	-0.106417	0.00164406	0.349	0.459	1	0
ENSMUSG00000036086	Zranb3	0.00635969	5.70624e-09	-0.050444	0.00250341	0.052	0.108	1	0
ENSMUSG00000021039	Snw1	0.00639821	0.00870493	-0.101897	0.0317674	0.0825	0.155	1	0
ENSMUSG00000043289	Mei4	0.0064221	0.00486326	-0.149519	0.0148495	0.4525	0.556	1	0
ENSMUSG00000032314	Etfa	0.00645811	0.0083043	-0.0957296	0.019294	0.0975	0.171	1	0
ENSMUSG00000086220	Gm16599	0.00646071	0.0038776	-0.106072	0.0177807	0.168	0.249	1	0
ENSMUSG00000021313	Ryr2	0.00649149	0.00286285	-0.223367	0.0220341	0.696	0.769	1	0
ENSMUSG00000038886	Man2a2	0.0064918	0.004303	-0.111952	0.00184975	0.331	0.43	1	0
ENSMUSG00000057897	Camk2b	0.00650989	0.00642585	0.153806	0.0124125	0.8855	0.885	1	0	SFARI						1
ENSMUSG00000052698	Tln2	0.00651669	0.00732331	-0.152344	0.0278304	0.543	0.648	1	0
ENSMUSG00000035919	Bbs9	0.00654839	0.000997872	-0.153127	0.00198664	0.2795	0.365	1	0
ENSMUSG00000025314	Ptprj	0.00655199	0.00442072	-0.150511	0.0106822	0.354	0.459	1	0
ENSMUSG00000038170	Pde4dip	0.00657264	0.00217945	-0.131894	0.00551726	0.6915	0.78	1	0
ENSMUSG00000060679	Mrps9	0.00667155	0.00528303	-0.133614	0.00208404	0.2455	0.333	1	0
ENSMUSG00000044288	Cnr1	0.00667353	0.00586125	-0.231864	0.0137859	0.4355	0.528	1	0	SFARI					2	0
ENSMUSG00000023175	Bsg	0.00670024	0.00391989	0.128284	0.00612698	0.2625	0.184	1	0
ENSMUSG00000032939	Nup93	0.00671038	0.0066672	-0.108541	0.0214452	0.458	0.577	1	0
ENSMUSG00000024429	Gnl1	0.00673183	0.00149104	0.0781895	0.00239189	0.109	0.055	1	0
ENSMUSG00000008682	Rpl10	0.00675336	0.00782743	0.124029	0.0258823	0.2095	0.134	1	0	SFARI					2	0
ENSMUSG00000039954	Stk32a	0.00682641	0.00400945	-0.168272	0.00814162	0.416	0.501	1	0
ENSMUSG00000021710	Nln	0.00685049	0.0091767	-0.109224	0.0242902	0.0905	0.163	1	0
ENSMUSG00000040029	Ipo8	0.00686005	0.00450812	-0.100951	0.0113729	0.156	0.236	1	0
ENSMUSG00000044221	Grsf1	0.00688009	0.00164853	-0.0780025	0	0.0775	0.139	1	0
ENSMUSG00000020456	Ogdh	0.00688655	0.00929443	-0.10746	0.0348091	0.4215	0.554	1	0
ENSMUSG00000025776	Crispld1	0.00690413	0.00875602	-0.106269	0.0215784	0.1045	0.178	1	0
ENSMUSG00000021189	Atxn3	0.00695064	0.00725994	-0.115536	0.0183814	0.147	0.226	1	0
ENSMUSG00000064210	Ano6	0.00695809	0.00226074	-0.124033	0.0129485	0.3135	0.415	1	0
ENSMUSG00000061911	Myt1l	0.00697084	0.0077202	-0.13776	0.0155495	0.945	0.987	1	0	SFARI;EAGLE;TADA	7.02e-08	Definitive	20.35	Concordant	1	0
ENSMUSG00000039086	Ss18l1	0.0069827	0.00579	-0.0781063	0.00756596	0.059	0.115	1	0
ENSMUSG00000040859	Bsdc1	0.0070135	0.00636661	-0.0769089	0.0152262	0.051	0.105	1	0
ENSMUSG00000020290	Xpo1	0.00704594	0.00708665	-0.103435	0.0267301	0.176	0.26	1	0	SFARI					2	0
ENSMUSG00000038369	Ncoa6	0.007093	0.0077346	-0.0981625	0.0181992	0.2515	0.352	1	0
ENSMUSG00000024054	Smchd1	0.00709712	0.000746197	-0.0850883	0.00196748	0.282	0.386	1	0
ENSMUSG00000056536	Pign	0.00710433	0.00612386	-0.108121	0.0161017	0.134	0.21	1	0
ENSMUSG00000024764	Naa40	0.00710588	0.00761458	-0.12633	0.0169674	0.206	0.294	1	0
ENSMUSG00000030201	Lrp6	0.00711209	0.00333611	-0.129783	0.00190147	0.3245	0.42	1	0
ENSMUSG00000019852	Arfgef3	0.00711332	0.00973243	-0.152859	0.0432566	0.331	0.43	1	0
ENSMUSG00000046598	Bdh1	0.00712221	0.00235188	-0.0786654	0.00254082	0.0485	0.1	1	0
ENSMUSG00000041771	Slc24a4	0.00714326	0.00986331	-0.136493	0.0468698	0.3685	0.483	1	0
ENSMUSG00000038784	Cnot4	0.00716175	0.00437891	-0.141229	0.0139854	0.475	0.577	1	0
ENSMUSG00000019806	Aig1	0.00716974	0.00939556	-0.149803	0.0361992	0.299	0.404	1	0
ENSMUSG00000054099	Slc25a40	0.00726528	0.0053909	-0.101884	0.0049763	0.072	0.131	1	0
ENSMUSG00000039828	Wdr70	0.00726709	0.00619383	-0.117329	0.0112228	0.1715	0.252	1	0
ENSMUSG00000048271	Rbm33	0.00726724	0.00392041	-0.11213	0.00595994	0.286	0.383	1	0
ENSMUSG00000062627	Mysm1	0.00726908	0.00423971	-0.117437	0.0133064	0.182	0.262	1	0
ENSMUSG00000028833	Ncdn	0.00727293	0.00536237	0.166765	0.00890957	0.3555	0.273	1	0
ENSMUSG00000032352	Lrrc1	0.00727821	0.00188226	-0.126656	0	0.3055	0.399	1	0	SFARI					2	0
ENSMUSG00000045210	Vcpip1	0.00728077	0.00162465	-0.0772757	0	0.088	0.152	1	0
ENSMUSG00000025195	Dnmbp	0.00730591	0.00204617	-0.106492	0.00422419	0.2155	0.302	1	0
ENSMUSG00000027263	Tubgcp4	0.00730764	0.00387433	-0.0882908	0.00495214	0.076	0.136	1	0
ENSMUSG00000024120	Lrpprc	0.00732974	0	-0.126757	0	0.241	0.325	1	0
ENSMUSG00000097267	1700109K24Rik	0.00733537	0.00546486	-0.0999096	0.0162483	0.1325	0.207	1	0
ENSMUSG00000039967	Zfp292	0.0073354	0.00916034	-0.185464	0.0281565	0.3455	0.433	1	0	SFARI					1	1
ENSMUSG00000021112	Pals1	0.00738174	0.00334747	-0.0959356	0.00246113	0.0785	0.139	1	0
ENSMUSG00000040410	Fbxl4	0.00740298	0.00241969	-0.0775464	0.00751026	0.0645	0.121	1	0
ENSMUSG00000029179	Zcchc4	0.00747465	0.000757558	-0.0625612	0.00733037	0.073	0.134	1	0
ENSMUSG00000032118	Fez1	0.00748432	0.00386467	-0.111302	0.0136324	0.1545	0.234	1	0
ENSMUSG00000097497	Gm26652	0.00757598	0.0105484	-0.102331	0.0349226	0.068	0.136	1	0
ENSMUSG00000034187	Nsf	0.00759951	0.00398809	-0.12997	0.00672474	0.5645	0.659	1	0
ENSMUSG00000024006	Stk38	0.00761865	0.00576642	-0.0975681	0.00219621	0.1825	0.268	1	0
ENSMUSG00000036264	Fstl4	0.00765027	0.00929056	-0.167153	0.0249005	0.488	0.596	1	0
ENSMUSG00000052374	Actn2	0.00765172	0.000700752	-0.118086	0.00504396	0.5985	0.714	1	0
ENSMUSG00000036478	Btg1	0.00768139	0.00799985	0.0969295	0.0116323	0.131	0.071	1	0
ENSMUSG00000060445	Sycp2	0.00770441	0.00172722	-0.118036	0.00470111	0.1245	0.194	1	0
ENSMUSG00000074305	Peak1	0.00772576	0.00607729	-0.117768	0.0221377	0.3215	0.425	1	0
ENSMUSG00000037818	Abhd18	0.00781544	0.00921959	-0.123005	0.0221297	0.1675	0.252	1	0
ENSMUSG00000006276	Eps15l1	0.00784567	0.00778794	-0.109013	0.0273094	0.302	0.402	1	0
ENSMUSG00000011960	Ccnt1	0.00787453	0.00651066	-0.132119	0.0177807	0.176	0.255	1	0
ENSMUSG00000040586	Ofd1	0.0078862	0.00913469	-0.0884231	0.017023	0.092	0.16	1	0	SFARI					2	0
ENSMUSG00000044216	Kcnj4	0.00789431	0.00441034	0.109691	0.00853678	0.222	0.147	1	0
ENSMUSG00000035183	Slc24a5	0.00790214	0.00429424	-0.105027	0	0.127	0.199	1	0
ENSMUSG00000031563	Wwc2	0.00794929	0.0055441	-0.101497	0.00731286	0.093	0.157	1	0
ENSMUSG00000057716	Tmem178b	0.00796147	0.00832475	-0.160296	0.0324213	0.7445	0.803	1	0
ENSMUSG00000020910	Adprm	0.00796389	0.00853344	-0.0738383	0.0102015	0.047	0.1	1	0
ENSMUSG00000075376	Rc3h2	0.00804138	0.000530116	-0.107086	0.00334472	0.412	0.517	1	0
ENSMUSG00000063972	Nr6a1	0.00812162	0.000475469	-0.121697	0.00171021	0.3765	0.478	1	0
ENSMUSG00000020283	Pex13	0.00814316	8.16195e-05	-0.0970828	0.00473383	0.115	0.184	1	0
ENSMUSG00000102805	Gm37240	0.00814671	0.0059583	-0.0910377	0.00390859	0.2715	0.373	1	0
ENSMUSG00000050856	Atp5k	0.00814818	0.0056125	0.161788	0.00801685	0.257	0.184	1	0
ENSMUSG00000087402	Gm11867	0.00817602	0.007131	0.129623	0.00192661	0.3255	0.241	1	0
ENSMUSG00000032030	Cul5	0.00817738	0.00813581	-0.0791321	0.0237713	0.2625	0.365	1	0
ENSMUSG00000024544	Ldlrad4	0.00818405	0.00740185	-0.207406	0.0160909	0.7295	0.816	1	0
ENSMUSG00000034290	Nek9	0.00819639	0.00225611	-0.114887	0.00658865	0.1875	0.268	1	0
ENSMUSG00000030122	Ptms	0.00821376	0.0024916	0.139126	0.00382792	0.316	0.236	1	0
ENSMUSG00000031818	Cox4i1	0.0082157	0.00249016	0.154212	0.0142679	0.3505	0.265	1	0
ENSMUSG00000049658	Bdp1	0.00828223	0.00141326	-0.122459	0.00558982	0.3425	0.436	1	0
ENSMUSG00000035770	Dync1li2	0.00829024	0.00385073	-0.111688	0.00821042	0.244	0.336	1	0
ENSMUSG00000026626	Ppp2r5a	0.00831858	0.00307844	-0.12131	0.0044743	0.1755	0.252	1	0
ENSMUSG00000028804	Csmd2	0.0083227	0.00800247	-0.128758	0.0179607	0.366	0.465	1	0
ENSMUSG00000029209	Gnpda2	0.00841881	0.0100559	-0.0754689	0.012736	0.0485	0.102	1	0
ENSMUSG00000038344	Txlng	0.00845845	0.00811821	-0.137698	0.0206096	0.316	0.412	1	0
ENSMUSG00000032698	Lmo2	0.00847826	0.00780282	-0.096877	0.0094458	0.122	0.194	1	0
ENSMUSG00000035067	Xkr6	0.00849408	0.00484319	-0.130643	0.0100706	0.7415	0.827	1	0
ENSMUSG00000021548	Ccnh	0.00854126	0.00577111	-0.11741	0.00625215	0.2295	0.318	1	0
ENSMUSG00000031028	Tub	0.00857192	0.00424818	-0.0868592	0.00486941	0.0865	0.15	1	0
ENSMUSG00000017404	Rpl19	0.00870191	0.0114048	0.162749	0.048491	0.236	0.155	1	0
ENSMUSG00000058070	Eml1	0.00871617	0.00971684	-0.110596	0.0360511	0.348	0.451	1	0
ENSMUSG00000030232	Aebp2	0.00880871	0.00152729	-0.101209	0.00208831	0.2335	0.323	1	0
ENSMUSG00000024211	Grm8	0.00881494	0.00217871	-0.192653	0.00693975	0.251	0.346	1	0
ENSMUSG00000024862	Klc2	0.00882841	0.00962207	-0.0852282	0.0148928	0.0775	0.139	1	0
ENSMUSG00000057193	Slc44a2	0.00884163	0.0107116	-0.0858369	0.0150023	0.068	0.129	1	0
ENSMUSG00000024064	Galnt14	0.00888553	0.00618621	-0.127077	0.0107952	0.1915	0.273	1	0	SFARI					2	0
ENSMUSG00000035215	Lsm7	0.00889252	0.00746097	-0.0830435	0.0139429	0.1285	0.202	1	0
ENSMUSG00000032560	Dnajc13	0.00909791	0.00673886	-0.138045	0.012049	0.269	0.352	1	0
ENSMUSG00000042705	Commd10	0.00912588	0.00436661	-0.11346	0.0125172	0.2255	0.315	1	0
ENSMUSG00000071037	Camkmt	0.00916794	0.00679453	-0.111782	0.00830061	0.373	0.478	1	0
ENSMUSG00000022321	Cdh10	0.00918637	0.00347116	-0.13905	0.00480067	0.3645	0.467	1	0	SFARI					2	0
ENSMUSG00000058704	Memo1	0.00921357	0.0112973	-0.0966518	0.0169556	0.3005	0.409	1	0	SFARI					2	0
ENSMUSG00000037857	Nufip2	0.00921656	0.00114924	-0.122032	0.00211867	0.207	0.289	1	0
ENSMUSG00000039630	Hnrnpu	0.00922249	0.00490139	-0.123054	0.0119316	0.613	0.709	1	0	SFARI					1	1
ENSMUSG00000050323	Ndufaf6	0.00923038	1.49792e-09	-0.0537293	0.00249728	0.055	0.108	1	0
ENSMUSG00000049336	Tenm2	0.00937521	0.00608383	0.214836	0.00603706	0.963	0.94	1	0
ENSMUSG00000097911	Gm26691	0.0094118	0.00115866	-0.103195	0.0123468	0.4595	0.562	1	0
ENSMUSG00000110246	C130073E24Rik	0.00944363	0.00603051	0.181058	0.0148117	0.197	0.126	1	0
ENSMUSG00000058546	Rpl23a	0.0094969	0.00416943	0.117009	0.0132488	0.1705	0.108	1	0
ENSMUSG00000021087	Rtn1	0.00950435	0.0102417	0.165485	0.0298328	0.896	0.906	1	0
ENSMUSG00000038095	Sbno1	0.00953098	0.00619398	-0.1096	0.00498035	0.424	0.53	1	0
ENSMUSG00000047409	Ctdspl	0.00956441	0.00562082	-0.0941296	0.00654987	0.4235	0.53	1	0
ENSMUSG00000037771	Slc32a1	0.00957412	0.00841506	0.150997	0.0198864	0.269	0.194	1	0
ENSMUSG00000041632	Mrps27	0.00964338	0.00685401	-0.0801867	0.00971569	0.096	0.16	1	0
ENSMUSG00000034807	Colgalt1	0.00965593	0.00951215	-0.0669812	0.0124257	0.0655	0.123	1	0
ENSMUSG00000068015	Lrch1	0.00972313	0.011028	-0.0947895	0.0319152	0.201	0.291	1	0
ENSMUSG00000040570	Rundc3b	0.00972556	0.00835566	-0.114628	0.012049	0.27	0.365	1	0
ENSMUSG00000037997	Parp11	0.0097307	0.0114533	-0.0684482	0.0127043	0.0515	0.105	1	0
ENSMUSG00000038879	Nipal2	0.00973145	0.00237761	-0.120357	0.00219149	0.1965	0.273	1	0
ENSMUSG00000059474	Mbtd1	0.00984229	0.00305229	-0.105147	0.0146085	0.44	0.549	1	0
ENSMUSG00000024259	Slc25a46	0.00989357	0.0118257	-0.115927	0.0237504	0.201	0.286	1	0
ENSMUSG00000046201	Scaf8	0.00989528	0.00922793	-0.132937	0.0300063	0.4185	0.514	1	0
ENSMUSG00000019775	Rgs17	0.0099892	0.0136209	-0.131687	0.036917	0.4105	0.522	1	0
ENSMUSG00000032782	Cntrob	0.0100473	0.0063341	-0.0716789	0.00760356	0.0495	0.1	1	0
ENSMUSG00000028926	Cdk14	0.010141	0.00418718	-0.121364	0.00471197	0.126	0.192	1	0
ENSMUSG00000053205	Styx	0.010204	0.0119798	-0.105139	0.0181363	0.1575	0.236	1	0
ENSMUSG00000019978	Epb41l2	0.0102105	0.00278601	-0.11956	0.00881335	0.177	0.255	1	0
ENSMUSG00000031600	Vps37a	0.010214	0.00940057	-0.105906	0.0215682	0.2005	0.283	1	0
ENSMUSG00000078427	Sarnp	0.010228	0.0079142	-0.110355	0.013512	0.1575	0.234	1	0
ENSMUSG00000032217	Rnf111	0.0102314	0.011489	-0.0968792	0.0245374	0.3145	0.417	1	0
ENSMUSG00000037339	Fam53a	0.0102444	0.0101238	-0.0826765	0.010026	0.063	0.118	1	0
ENSMUSG00000079055	Slc8a3	0.0102876	0.00835603	-0.125376	0.0178039	0.3515	0.451	1	0
ENSMUSG00000075415	Fnbp1	0.0102952	0.0097977	-0.103358	0.0302606	0.1985	0.278	1	0
ENSMUSG00000029647	Pan3	0.0103506	0.0120926	-0.16901	0.0326348	0.478	0.567	1	0
ENSMUSG00000019947	Arid5b	0.0103819	0.0133094	-0.112957	0.0431269	0.1325	0.207	1	0
ENSMUSG00000046727	Cystm1	0.0103838	0.00822783	-0.0935527	0.017627	0.176	0.257	1	0
ENSMUSG00000085631	9630028H03Rik	0.0104079	0.0132873	-0.109283	0.0272963	0.37	0.48	1	0
ENSMUSG00000029632	Ndufa4	0.0104302	0.000763724	0.186453	0.00557963	0.297	0.226	1	0
ENSMUSG00000041552	Ptchd1	0.0104313	6.56125e-05	-0.0747844	0.00221529	0.16	0.239	1	0	SFARI;EAGLE		No scorable evidence	0	Discordant	1	0
ENSMUSG00000024558	Mapk4	0.0104993	0.00408282	-0.135095	0.00849615	0.61	0.68	1	0
ENSMUSG00000032998	Foxj3	0.0105188	0.00250683	-0.112427	0.013051	0.192	0.27	1	0
ENSMUSG00000026455	Klhl12	0.0105498	0.00687513	-0.0969368	0.0072095	0.104	0.168	1	0
ENSMUSG00000032727	Mier3	0.0105816	0.00331394	-0.0724128	0.00500069	0.0645	0.118	1	0
ENSMUSG00000032253	Phip	0.0105963	0.00545594	-0.148214	0.0167769	0.5445	0.64	1	0	SFARI					1	1
ENSMUSG00000027366	Sppl2a	0.0106893	0.00363298	-0.113584	0.00777253	0.3005	0.394	1	0
ENSMUSG00000036940	Kdm1a	0.0106909	0.0104905	-0.0716051	0.0172909	0.194	0.283	1	0
ENSMUSG00000028412	Slc44a1	0.0107084	0.00815047	-0.105741	0.00981855	0.278	0.37	1	0
ENSMUSG00000032177	Pde4a	0.0107314	0.00102818	-0.106915	0	0.302	0.391	1	0
ENSMUSG00000061143	Maml3	0.0107702	0.00444004	-0.0930727	0.0257842	0.3225	0.43	1	0
ENSMUSG00000058706	0610030E20Rik	0.0108176	0.00338138	-0.0754419	0.00254717	0.051	0.1	1	0
ENSMUSG00000060475	Wtap	0.0108317	0.010439	-0.101121	0.0185064	0.1375	0.21	1	0
ENSMUSG00000039372	Marchf4	0.0108594	0.00572161	-0.130964	0.00461602	0.146	0.213	1	0
ENSMUSG00000052942	Glis3	0.0108853	0.0073655	0.124765	0.0320249	0.109	0.058	1	0
ENSMUSG00000005705	Agrp	0.0109266	0.0136051	0.136484	0.0303937	0.2535	0.173	1	0
ENSMUSG00000058690	Ccser2	0.0109388	0.0117772	-0.110732	0.0238513	0.2085	0.291	1	0
ENSMUSG00000012405	Rpl15	0.01099	0.00815527	0.0882828	0.00465818	0.1365	0.079	1	0
ENSMUSG00000040928	S100pbp	0.0110596	0.00363657	-0.136589	0.0148207	0.4425	0.53	1	0
ENSMUSG00000059834	Sclt1	0.0110766	0.000786516	-0.0905736	0.00159272	0.445	0.551	1	0
ENSMUSG00000021823	Vcl	0.0111321	0.00339053	-0.130928	0.0109693	0.307	0.396	1	0
ENSMUSG00000005683	Cs	0.0111342	0.00961209	-0.0855398	0.00733037	0.084	0.144	1	0
ENSMUSG00000020705	Ddx42	0.0111967	0.00875235	-0.150831	0.0127254	0.2215	0.302	1	0
ENSMUSG00000029169	Dhx15	0.0112388	0.00373512	-0.0982206	0.00560005	0.3255	0.425	1	0
ENSMUSG00000067567	Hdac8	0.0112426	0.00703826	-0.126312	0.0233185	0.294	0.383	1	0	SFARI						1
ENSMUSG00000004568	Arhgef18	0.011282	0.00215807	-0.0888599	0	0.109	0.173	1	0
ENSMUSG00000038301	Snx10	0.011292	0.00618251	-0.111688	0.00821042	0.248	0.333	1	0
ENSMUSG00000031647	Mfap3l	0.0112965	0.0112155	-0.0937973	0.018892	0.122	0.192	1	0
ENSMUSG00000070808	Bicra	0.0113508	0.0104287	-0.0729823	0.0123058	0.0815	0.142	1	0	SFARI					2	0
ENSMUSG00000036158	Prickle1	0.011369	0.00194052	-0.12616	0.00871175	0.3555	0.449	1	0	SFARI					2	0
ENSMUSG00000029471	Camkk2	0.0114033	0.00663027	-0.142311	0.00795124	0.458	0.549	1	0
ENSMUSG00000030303	Far2	0.0114136	0.0026148	-0.084043	0.0193092	0.189	0.268	1	0
ENSMUSG00000020321	Mdh1	0.0114476	0.00575923	0.163051	0.0145391	0.429	0.354	1	0
ENSMUSG00000025967	Eef1b2	0.0114512	0.00244524	0.085794	0.00471197	0.1245	0.071	1	0
ENSMUSG00000022607	Ptk2	0.0114827	0.0107922	-0.112888	0.0150911	0.4805	0.585	1	0
ENSMUSG00000050334	C130071C03Rik	0.0114836	0.00547447	-0.122109	0.00305431	0.4645	0.567	1	0
ENSMUSG00000038872	Zfhx3	0.0115127	0.00392984	-0.18341	0.0294009	0.571	0.633	1	0
ENSMUSG00000006373	Pgrmc1	0.0115187	0.00235675	0.091956	0.00663148	0.193	0.126	1	0
ENSMUSG00000037712	Fermt2	0.0115315	0.00763184	-0.07502	0.00946772	0.1115	0.178	1	0
ENSMUSG00000023845	Lnpep	0.0116025	0.00602019	-0.10187	0.0174387	0.2885	0.381	1	0
ENSMUSG00000085996	A830012C17Rik	0.0116191	0.00556172	-0.0935421	0.00719255	0.1025	0.165	1	0
ENSMUSG00000050071	Bex1	0.01163	0.0048243	0.0720601	0.00473383	0.126	0.071	1	0
ENSMUSG00000000531	Tamalin	0.0116404	0.00784486	-0.111491	0.011876	0.117	0.181	1	0
ENSMUSG00000055436	Srsf11	0.0116422	0.00906496	-0.124506	0.0183814	0.4935	0.596	1	0	SFARI					2	0
ENSMUSG00000020463	Ppp4r3b	0.0116513	0.014245	-0.105211	0.0260305	0.2635	0.362	1	0
ENSMUSG00000035517	Tdrd7	0.0116601	0.0120779	-0.109506	0.012699	0.227	0.31	1	0
ENSMUSG00000085741	5430405H02Rik	0.0116915	0.000726235	-0.0650478	0.00495214	0.071	0.126	1	0
ENSMUSG00000021038	Vipas39	0.0117179	0.00675665	-0.0999847	0.00472288	0.122	0.189	1	0
ENSMUSG00000020790	Ankfy1	0.0117612	0.0152863	-0.0915537	0.0301329	0.2005	0.291	1	0
ENSMUSG00000039686	Zer1	0.011764	0.00419336	-0.113575	0.00618893	0.2495	0.328	1	0
ENSMUSG00000038759	Nup205	0.0117826	0.00530623	-0.0989579	0.00245521	0.0865	0.144	1	0
ENSMUSG00000031620	Iqcm	0.0118415	0.0095893	-0.0900906	0.0173539	0.064	0.118	1	0
ENSMUSG00000031355	Arhgap6	0.0118677	0.0132531	-0.178985	0.0363725	0.2995	0.386	1	0
ENSMUSG00000032959	Pebp1	0.0118852	0.0125128	0.139482	0.0163553	0.2415	0.168	1	0
ENSMUSG00000038828	Tmem214	0.0119847	0.000452653	-0.0928993	0.00484628	0.1	0.16	1	0
ENSMUSG00000028176	Lrrc7	0.0119994	0.0113662	-0.0883729	0.0129708	1	1	1	0
ENSMUSG00000044791	Setd2	0.0120087	0.0107675	-0.108979	0.0197742	0.3675	0.462	1	0	SFARI					1	0
ENSMUSG00000035530	Eif1	0.0120432	0.00735198	0.190701	0.0277273	0.4175	0.349	1	0
ENSMUSG00000021895	Arhgef3	0.0120444	0.0111338	-0.0735838	0.0177807	0.1585	0.236	1	0
ENSMUSG00000020658	Efr3b	0.0120505	0.00538245	-0.0903757	0.010989	0.327	0.428	1	0
ENSMUSG00000055782	Abcd2	0.0120835	0.0113086	-0.0854087	0.00995266	0.068	0.123	1	0
ENSMUSG00000021079	Timm9	0.0121493	0.0128314	-0.102576	0.0195977	0.19	0.27	1	0
ENSMUSG00000086433	Rsf1os1	0.0121761	0.0166276	-0.0991957	0.0356313	0.1115	0.186	1	0
ENSMUSG00000097391	Mirg	0.0122109	0.0074057	0.169051	0.0131325	0.6455	0.585	1	0
ENSMUSG00000086040	Wipf3	0.01232	0.00233966	-0.0869331	0.0105578	0.492	0.606	1	0
ENSMUSG00000063015	Ccni	0.0124069	0.0118396	-0.0626995	0.0143013	0.101	0.168	1	0
ENSMUSG00000033808	Tmem87a	0.0124213	0.00955629	-0.0991344	0.00879436	0.1825	0.262	1	0
ENSMUSG00000039057	Myo16	0.012449	0.000631409	-0.125545	0.00904786	0.1485	0.215	1	0	SFARI					2	0
ENSMUSG00000040265	Dnm3	0.0125848	0.00486908	-0.113858	0.0158922	0.609	0.711	1	0
ENSMUSG00000000339	Rtca	0.012644	0.0177115	-0.103499	0.0303034	0.059	0.121	1	0
ENSMUSG00000031902	Nfatc3	0.0127153	0.00616457	-0.0911919	0.00726081	0.097	0.157	1	0
ENSMUSG00000078870	Gm14410	0.0127299	0.00887021	-0.0752329	0.00496419	0.077	0.134	1	0
ENSMUSG00000021262	Evl	0.012837	0.011453	-0.124056	0.0146522	0.358	0.449	1	0
ENSMUSG00000022704	Qtrt2	0.0128647	0.0149804	-0.0994715	0.0167044	0.106	0.173	1	0
ENSMUSG00000057666	Gapdh	0.0128925	0.0177812	0.241098	0.0400106	0.484	0.407	1	0
ENSMUSG00000092416	Zfp141	0.0129002	0.00697996	-0.065358	0.0049763	0.063	0.115	1	0
ENSMUSG00000024068	Spast	0.012907	0.0138476	-0.0914585	0.0143013	0.105	0.171	1	0	SFARI;EAGLE		Moderate	8.1	Discordant	1	0
ENSMUSG00000064202	Spata6l	0.0129136	0.0154683	-0.0801752	0.0173539	0.068	0.126	1	0
ENSMUSG00000003604	Aven	0.012924	0.0134803	-0.0992235	0.0119037	0.11	0.176	1	0
ENSMUSG00000005871	Apc	0.0129525	0.012709	-0.129185	0.0146977	0.5775	0.682	1	0
ENSMUSG00000026443	Lrrn2	0.0129694	0.000442049	0.137766	0	0.341	0.268	1	0
ENSMUSG00000030086	Chchd6	0.0129953	0.00131072	-0.0861601	0.00448414	0.1585	0.234	1	0
ENSMUSG00000053580	Tanc2	0.0129993	0.00726592	-0.154722	0.00956601	0.911	0.95	1	0	SFARI;EAGLE;TADA	0.00200495	Definitive	24.95	Concordant	1	1
ENSMUSG00000042747	Krtcap2	0.0130041	0.0139961	0.0609799	0.0169021	0.1075	0.055	1	0
ENSMUSG00000025468	Caly	0.0130061	0.00619121	0.165792	0.00180078	0.35	0.278	1	0
ENSMUSG00000023072	Cep89	0.0131339	0.0111097	-0.0817774	0.0190241	0.113	0.178	1	0
ENSMUSG00000009470	Tnpo1	0.0132296	0.011722	-0.111545	0.0145737	0.362	0.457	1	0
ENSMUSG00000059824	Dbp	0.0133167	0.00405944	-0.105808	0.00887083	0.1825	0.255	1	0
ENSMUSG00000048756	Foxo3	0.0133655	0.014027	-0.116967	0.0182354	0.2665	0.352	1	0
ENSMUSG00000011158	Brf1	0.0134123	0.0157299	-0.0828451	0.00482336	0.093	0.157	1	0
ENSMUSG00000036054	Sugp2	0.0134325	0.00798819	-0.0836808	0.00221529	0.1785	0.257	1	0
ENSMUSG00000046876	Atxn1	0.0134456	0.00703973	-0.119348	0.0147467	0.954	0.976	1	0
ENSMUSG00000032480	Dhx30	0.0134682	0.00441539	-0.0999084	0	0.269	0.365	1	0	SFARI						1
ENSMUSG00000032294	Pkm	0.0134746	0.0119217	0.176259	0.0371001	0.357	0.281	1	0
ENSMUSG00000038916	Soga3	0.0135256	0.0140461	-0.0942827	0.0275199	0.285	0.381	1	0
ENSMUSG00000048285	Frmd6	0.0135934	0.0147888	-0.113804	0.0244845	0.214	0.299	1	0
ENSMUSG00000066392	Nrxn3	0.0135985	0.0139809	-0.105474	0.0145493	1	1	1	0	SFARI;EAGLE		Moderate	11.1	Discordant	1	0
ENSMUSG00000043831	Lysmd4	0.0136275	0.0166342	-0.110732	0.0238513	0.197	0.278	1	0
ENSMUSG00000041685	Fcho2	0.0136408	0.00561264	-0.125089	0.00972495	0.303	0.386	1	0
ENSMUSG00000022948	Setd4	0.0136518	0.016724	-0.10551	0.0233064	0.2035	0.289	1	0
ENSMUSG00000026349	Ccnt2	0.013654	0.0103761	-0.106748	0.0111899	0.337	0.433	1	0
ENSMUSG00000052915	Msl1	0.0137	0.0154641	-0.070109	0.0308489	0.164	0.244	1	0
ENSMUSG00000021488	Nsd1	0.0137322	0.00359597	-0.124139	0.00659433	0.563	0.685	1	0	SFARI					1	1
ENSMUSG00000031508	Ankrd10	0.0137558	0.00251395	-0.107347	0.00630366	0.226	0.304	1	0
ENSMUSG00000058076	Sdhc	0.0138097	0.0056008	-0.0741707	0.00239189	0.105	0.168	1	0
ENSMUSG00000024059	Clip4	0.0138897	0.00968281	-0.10542	0.00329078	0.4305	0.535	1	0
ENSMUSG00000073643	Wdfy1	0.013893	0.01065	-0.096877	0.0094458	0.1205	0.186	1	0
ENSMUSG00000037706	Cd81	0.0139178	0.00770603	0.127501	0.0145588	0.224	0.157	1	0
ENSMUSG00000027361	Gabpb1	0.013932	0.0187705	-0.0964943	0.0318109	0.155	0.236	1	0
ENSMUSG00000034949	Zfr2	0.0139409	0.00142974	-0.0865294	0.00450393	0.151	0.223	1	0
ENSMUSG00000017421	Zfp207	0.0139598	0.0106705	-0.112014	0.0247583	0.5195	0.625	1	0
ENSMUSG00000056260	Lrif1	0.0139887	0.0107754	-0.0885705	0.0203808	0.1495	0.22	1	0
ENSMUSG00000034083	Ccdc174	0.0140488	0.00672603	-0.0815202	0.00726081	0.0995	0.16	1	0
ENSMUSG00000048410	Zfp407	0.014103	0.0167117	-0.113434	0.0242541	0.4595	0.572	1	0
ENSMUSG00000048701	Ccdc6	0.0142156	0.00331388	-0.0886181	0.00461602	0.1485	0.218	1	0
ENSMUSG00000015733	Capza2	0.014282	0.00114003	-0.0723038	0.00436891	0.1875	0.268	1	0
ENSMUSG00000101448	Gm28494	0.0142846	0.00990987	-0.0847434	0.00771376	0.2455	0.333	1	0
ENSMUSG00000027030	Stk39	0.0142942	0.0121597	-0.123267	0.0197708	0.2665	0.346	1	0	SFARI					2	0
ENSMUSG00000090290	Tarbp1	0.0143672	0.0125601	-0.0721335	0.0121591	0.089	0.15	1	0
ENSMUSG00000079157	Nalf1	0.0143739	0.0154308	-0.190253	0.0470704	0.6325	0.717	1	0
ENSMUSG00000060126	Tpt1	0.0143824	0.00269465	0.133408	0.00207135	0.227	0.16	1	0
ENSMUSG00000084890	A830036E02Rik	0.0143938	0.00358393	-0.074336	0.0046903	0.1115	0.176	1	0
ENSMUSG00000071072	Ptges3	0.0144596	0.00273097	-0.0491317	0	0.1035	0.168	1	0
ENSMUSG00000036356	Csgalnact1	0.0145144	0.00337834	-0.139455	0.00697932	0.0905	0.147	1	0
ENSMUSG00000022779	Top3b	0.0146176	0.0138327	-0.0892835	0.00964678	0.0985	0.16	1	0	SFARI					2	0
ENSMUSG00000032563	Mrpl3	0.0146571	0.00596398	-0.077831	0.00471197	0.126	0.192	1	0
ENSMUSG00000052920	Prkg1	0.0146822	0.00481073	0.267298	0.00754266	0.3715	0.289	1	0
ENSMUSG00000054280	Prr14l	0.0146928	0.00149759	-0.107832	0.00452391	0.1535	0.223	1	0	TADA	0.0546925
ENSMUSG00000059921	Unc5c	0.0147386	0.0145944	-0.176005	0.0322516	0.5855	0.667	1	0
ENSMUSG00000022681	Ntan1	0.014787	0.00489193	-0.0640631	0.00751026	0.0645	0.115	1	0
ENSMUSG00000021824	Ap3m1	0.014819	0.00590401	-0.0911868	0.00654637	0.188	0.262	1	0
ENSMUSG00000026966	Ssna1	0.0148677	0.00751084	-0.0606639	0.00250341	0.0575	0.108	1	0
ENSMUSG00000029167	Ppargc1a	0.0148897	0.00204189	-0.11504	0.00826028	0.231	0.31	1	0
ENSMUSG00000027957	Slc35a3	0.014934	0.00885897	-0.0729491	0.0100755	0.0605	0.11	1	0
ENSMUSG00000063480	Snu13	0.0149523	0.00315908	0.0742654	0.00238072	0.1195	0.068	1	0
ENSMUSG00000021764	Ndufs4	0.0149548	0.0168118	-0.109337	0.0419556	0.3125	0.407	1	0
ENSMUSG00000043241	Upf2	0.0149772	0.00406464	-0.109986	0.00190147	0.319	0.407	1	0	SFARI					2	0
ENSMUSG00000040028	Elavl1	0.0149843	0.00474654	-0.086109	0	0.139	0.207	1	0
ENSMUSG00000014418	Hps5	0.0149928	0.00665605	-0.0763901	0.00482336	0.0995	0.16	1	0
ENSMUSG00000024078	Ttc27	0.0150438	0.00447542	-0.0724128	0.00500069	0.067	0.118	1	0
ENSMUSG00000021973	Micu2	0.0150487	0.0132338	-0.0690805	0.0116323	0.122	0.192	1	0
ENSMUSG00000029208	Guf1	0.0150676	0.0134393	-0.0984878	0.00900791	0.16	0.234	1	0
ENSMUSG00000014402	Tsg101	0.0150986	0.00419371	-0.0881981	0.00252198	0.0615	0.11	1	0
ENSMUSG00000027350	Chgb	0.015167	0.000760951	0.125783	0.00396171	0.247	0.176	1	0
ENSMUSG00000026596	Abl2	0.0151911	0.0179973	-0.129898	0.027434	0.4005	0.496	1	0	SFARI					3	0
ENSMUSG00000046922	Gpr6	0.0151923	0.00137034	0.177628	0.00933061	0.4725	0.399	1	0
ENSMUSG00000029569	Tmem168	0.0152089	0.00390994	-0.0763142	0	0.059	0.108	1	0
ENSMUSG00000020817	Rabep1	0.0153505	0.00562422	-0.0798264	0.0141492	0.526	0.635	1	0
ENSMUSG00000036916	Zfp280c	0.0153544	0.0141222	-0.113847	0.0100905	0.2415	0.328	1	0
ENSMUSG00000029223	Uchl1	0.0153818	0.0167014	0.144302	0.00961496	0.2975	0.223	1	0
ENSMUSG00000040565	Btaf1	0.0153914	0.0135628	-0.154933	0.0269406	0.534	0.619	1	0	SFARI					2	0
ENSMUSG00000018796	Acsl1	0.0154071	0.0139282	-0.102133	0.011876	0.122	0.186	1	0
ENSMUSG00000069769	Msi2	0.0154129	0.0105758	-0.101531	0.0138797	0.26	0.352	1	0
ENSMUSG00000022536	Glyr1	0.0154477	0.0143289	-0.0870421	0.015575	0.1705	0.247	1	0
ENSMUSG00000040040	Ift88	0.0155381	0.00543998	-0.076507	0.00236417	0.1125	0.176	1	0
ENSMUSG00000044573	Acp1	0.0155852	0.0056152	-0.0950107	0.00195616	0.2835	0.37	1	0
ENSMUSG00000034341	Wbp2	0.0156238	0.00841063	-0.0750766	0.00253451	0.055	0.102	1	0
ENSMUSG00000026171	Rnf25	0.0156955	0.00851911	-0.0993358	0.00908816	0.151	0.22	1	0	SFARI					2	0
ENSMUSG00000063145	Bbs5	0.0157669	0.0101486	-0.0918858	0.00462649	0.1495	0.218	1	0
ENSMUSG00000026869	Psmd5	0.0157902	0.00718466	-0.0677446	0	0.0785	0.134	1	0
ENSMUSG00000014313	Cox6c	0.015794	0.018918	0.187679	0.0300322	0.357	0.281	1	0
ENSMUSG00000020262	Adarb1	0.0158235	0.000881965	-0.0818246	0.0104416	0.22	0.302	1	0
ENSMUSG00000045248	Med26	0.015865	0	-0.0752286	0	0.073	0.126	1	0
ENSMUSG00000062098	Btbd3	0.015928	0.0112629	-0.0797554	0.00740129	0.075	0.129	1	0
ENSMUSG00000034820	Cpsf7	0.0160203	0.0221928	-0.0957988	0.0389326	0.147	0.231	1	0	TADA	0.0252972
ENSMUSG00000025278	Flnb	0.0160292	0.0213862	-0.129483	0.0340078	0.2205	0.304	1	0
ENSMUSG00000037536	Fbxo34	0.0160369	0.00143134	-0.0788256	0.00440666	0.186	0.262	1	0
ENSMUSG00000032036	Kirrel3	0.0160467	0.020549	-0.242223	0.0625443	0.8755	0.885	1	0	SFARI					2	0
ENSMUSG00000059475	Zfp426	0.0160793	0.00842731	-0.0808976	0.00751026	0.0655	0.115	1	0
ENSMUSG00000024576	Csnk1a1	0.0161005	0.00843505	-0.1193	0.00270594	0.579	0.656	1	0
ENSMUSG00000079658	Eloc	0.0161072	0.0114849	-0.0685391	0.0121014	0.0905	0.15	1	0
ENSMUSG00000004698	Hdac9	0.0161629	0.00925732	-0.187248	0.00169318	0.3795	0.454	1	0
ENSMUSG00000022772	Senp5	0.016184	0.00717065	-0.0958626	0.00389367	0.295	0.383	1	0
ENSMUSG00000071267	Zfp942	0.0161893	0.0205994	-0.0783549	0.0217832	0.0895	0.152	1	0
ENSMUSG00000055540	Epha6	0.0163146	0.0126099	-0.147974	0.0136567	0.9435	0.976	1	0
ENSMUSG00000050640	Tmem150c	0.016359	0.0202778	-0.0960196	0.0221511	0.08	0.139	1	0
ENSMUSG00000063296	Tmem117	0.0163875	0.0125985	-0.139536	0.0117259	0.268	0.346	1	0
ENSMUSG00000025537	Phkg1	0.0163897	0.00962074	0.271411	0.0133853	0.16	0.105	1	0
ENSMUSG00000039230	Tbcd	0.0165316	0.0177766	-0.0921097	0.00683895	0.1495	0.223	1	0
ENSMUSG00000022983	Scaf4	0.0167443	0.00514648	-0.0940322	0.00416384	0.2365	0.318	1	0	SFARI					2	0
ENSMUSG00000020176	Grb10	0.0167671	0.00178541	-0.11168	0.00224948	0.1585	0.228	1	0	SFARI					3	0
ENSMUSG00000026235	Epha4	0.0167766	0.0150906	-0.127163	0.0310853	0.6155	0.703	1	0
ENSMUSG00000047284	Neurl4	0.0167925	0.0202465	0.0840529	0.0212291	0.1235	0.068	1	0
ENSMUSG00000060227	Golm2	0.0168636	0.012947	-0.0693464	0.0269996	0.2705	0.357	1	0
ENSMUSG00000037016	Frem2	0.0168825	0.0127264	-0.0785737	0.00992844	0.067	0.118	1	0
ENSMUSG00000030306	Tmtc1	0.0170254	0.0166778	-0.117183	0.0287382	0.546	0.669	1	0
ENSMUSG00000042292	Mrtfa	0.0170296	0.00328465	-0.0904332	0.0101507	0.416	0.512	1	0
ENSMUSG00000021076	Actr10	0.0170396	0.020805	-0.0895345	0.0279508	0.1255	0.197	1	0
ENSMUSG00000031174	Rpgr	0.017058	0.0199374	-0.123042	0.0254412	0.4025	0.501	1	0
ENSMUSG00000037300	Ttc13	0.0170752	0.0209076	-0.0986495	0.0260073	0.1255	0.194	1	0
ENSMUSG00000017478	Zc3h18	0.0170841	0.00840632	-0.0826644	0.00736566	0.0865	0.142	1	0
ENSMUSG00000038473	Nos1ap	0.0170889	0.0239474	-0.183205	0.0702769	0.483	0.585	1	0
ENSMUSG00000026771	Spopl	0.0171595	0.0207677	-0.0838635	0.0377873	0.2085	0.294	1	0
ENSMUSG00000030199	Etv6	0.017165	0.00300388	-0.0992205	0.0022347	0.1745	0.244	1	0
ENSMUSG00000022184	Fbxo4	0.017224	0.0171373	-0.0710342	0.0175674	0.0575	0.108	1	0
ENSMUSG00000028797	Tmem234	0.0172877	0.00773191	-0.0950163	0.0106822	0.2205	0.297	1	0
ENSMUSG00000014164	Klhl3	0.0174557	0.0189133	-0.0902169	0.0285772	0.2965	0.391	1	0
ENSMUSG00000005907	Pex1	0.017467	0.0208164	-0.0777138	0.0188049	0.1185	0.186	1	0
ENSMUSG00000022602	Arc	0.0174683	0.0111346	0.161482	0.0178455	0.2125	0.147	1	0
ENSMUSG00000002017	Fam98a	0.0174704	0	-0.0628877	0	0.058	0.105	1	0
ENSMUSG00000001855	Nup214	0.0174949	0.0118805	-0.0756986	0.01636	0.117	0.181	1	0
ENSMUSG00000040297	Suco	0.0174968	0.00775273	-0.0967961	0.015725	0.269	0.352	1	0
ENSMUSG00000020859	Spag9	0.0174971	0.0176612	-0.10932	0.0229254	0.568	0.667	1	0
ENSMUSG00000021147	Wdr37	0.0175068	0.00738536	-0.128852	0.0112104	0.328	0.409	1	0
ENSMUSG00000027674	Pex5l	0.0175543	0.017276	-0.0826681	0.0133645	0.147	0.22	1	0
ENSMUSG00000050530	Fam171a1	0.0176827	0.0108503	-0.0861453	0.01547	0.3975	0.496	1	0
ENSMUSG00000020564	Atxn7l1	0.0177072	0.00858155	-0.0816689	0.00819394	0.2375	0.32	1	0
ENSMUSG00000018548	Trim37	0.0177963	0.0188702	-0.115587	0.00573651	0.3005	0.386	1	0
ENSMUSG00000039901	Armh3	0.0178734	0.00392061	-0.109865	0.00583494	0.287	0.37	1	0
ENSMUSG00000033545	Znrf1	0.0179007	0.020115	-0.111476	0.0399096	0.5935	0.706	1	0
ENSMUSG00000038467	Chmp4b	0.017912	0.0140884	-0.051156	0.00712557	0.097	0.157	1	0
ENSMUSG00000033411	Ctdspl2	0.0181479	0.0177592	-0.0735604	0.00853678	0.2045	0.289	1	0
ENSMUSG00000073563	Csnk1g3	0.0181736	0.00887637	-0.0701724	0.010517	0.358	0.457	1	0
ENSMUSG00000032936	Camkv	0.0181749	0.017812	0.178933	0.0356058	0.7875	0.806	1	0
ENSMUSG00000042686	Jph1	0.0181794	0.0155032	-0.0853746	0.00218212	0.185	0.26	1	0
ENSMUSG00000021244	Ylpm1	0.0182178	0.00182454	-0.143539	0.00508165	0.646	0.73	1	0
ENSMUSG00000040990	Sh3kbp1	0.0182184	0.0104088	-0.0945659	0.0208465	0.567	0.685	1	0
ENSMUSG00000008305	Tle1	0.018228	0.00695932	-0.0902415	0.00541189	0.337	0.428	1	0
ENSMUSG00000085201	Nr6a1os	0.0182488	0.0177995	-0.0792154	0.0211314	0.1115	0.176	1	0
ENSMUSG00000028672	Hmgcl	0.0182708	0.0186998	-0.0869727	0.0124257	0.0775	0.131	1	0
ENSMUSG00000042216	Sgsm1	0.0182971	0.000316441	-0.0908678	0.0128321	0.198	0.273	1	0
ENSMUSG00000017288	Vps53	0.0183147	0.0246213	-0.0734207	0.0369322	0.1325	0.21	1	0
ENSMUSG00000002416	Ndufb2	0.0184351	0.0201889	0.0943233	0.0230811	0.1405	0.084	1	0
ENSMUSG00000026705	Klhl20	0.0184711	0.0182736	-0.0666426	0.0101507	0.0525	0.1	1	0
ENSMUSG00000034163	Zfc3h1	0.0185003	0.0167711	-0.0835394	0.0168313	0.3345	0.43	1	0
ENSMUSG00000034312	Iqsec1	0.0185366	0.0033414	-0.119305	0.00586289	0.5105	0.598	1	0
ENSMUSG00000003429	Rps11	0.0185829	0.0116956	0.086146	0.0189358	0.1115	0.063	1	0
ENSMUSG00000109901	Chmp1b	0.018608	0.00493284	-0.0561704	0	0.0535	0.1	1	0
ENSMUSG00000022139	Mbnl2	0.0187061	0.0234247	-0.130908	0.0264771	0.7905	0.866	1	0
ENSMUSG00000071662	Polr2g	0.0187236	0.0231384	-0.0876445	0.0216803	0.0995	0.163	1	0
ENSMUSG00000021730	Hcn1	0.0187617	0.0114646	-0.108389	0.0198864	0.193	0.268	1	0	SFARI						1
ENSMUSG00000022237	Ankrd33b	0.0187755	0.00881762	-0.0762258	0.00737898	0.332	0.425	1	0
ENSMUSG00000038665	Dgki	0.0187868	0.0021647	-0.13402	0.00361112	0.9855	0.987	1	0
ENSMUSG00000028107	Tars2	0.0188102	0.00574906	-0.0743474	0.00938066	0.13	0.194	1	0
ENSMUSG00000005983	1700037C18Rik	0.0188572	0.00402375	-0.0674371	0.00250341	0.0645	0.113	1	0
ENSMUSG00000032575	Manf	0.0188758	0.0108456	-0.122266	0.0128861	0.198	0.27	1	0
ENSMUSG00000041935	AW549877	0.0190199	3.10155e-05	-0.0632464	0.00481199	0.097	0.155	1	0
ENSMUSG00000025920	Stau2	0.0190767	0.0030705	-0.0863722	0.00414973	0.5105	0.64	1	0
ENSMUSG00000031327	Chic1	0.0191154	0.0157744	-0.114089	0.0176652	0.185	0.255	1	0
ENSMUSG00000072694	1500011B03Rik	0.0191211	0.0212009	-0.0901592	0.0194782	0.089	0.147	1	0
ENSMUSG00000029676	Pot1a	0.0191293	0.0133934	-0.084806	0.00988036	0.083	0.136	1	0	SFARI					2	0
ENSMUSG00000066892	Fbxl12	0.0191294	0.00983369	-0.0560599	0.00734797	0.0735	0.126	1	0
ENSMUSG00000087264	Gad1os	0.019157	0.0038669	-0.0807313	0	0.088	0.142	1	0
ENSMUSG00000038563	Efl1	0.0191647	0.0238533	-0.083897	0.0263122	0.1105	0.176	1	0
ENSMUSG00000030374	Strn4	0.0192235	0.0174687	-0.0853018	0.017742	0.176	0.249	1	0
ENSMUSG00000028488	Sh3gl2	0.019274	0.0227302	-0.14732	0.0301541	0.252	0.331	1	0
ENSMUSG00000053253	Ndfip2	0.0192946	0.0079012	-0.102009	0.00900394	0.3415	0.438	1	0
ENSMUSG00000029422	Rsrc2	0.0193234	0.00363207	-0.0944672	0.00383512	0.3005	0.388	1	0
ENSMUSG00000105736	Gm42456	0.0194677	0.0140467	-0.0914425	0.0105934	0.2215	0.302	1	0
ENSMUSG00000032504	Pdcd6ip	0.0195076	0.02184	-0.0785365	0.021835	0.097	0.157	1	0
ENSMUSG00000059401	Mamld1	0.0195411	0.0250429	-0.098696	0.0307365	0.117	0.184	1	0
ENSMUSG00000028945	Rheb	0.0195671	0.00227987	0.155921	0.0154863	0.239	0.171	1	0	SFARI						1
ENSMUSG00000030695	Aldoa	0.0195674	0.0128202	0.18553	0.00470473	0.4305	0.365	1	0
ENSMUSG00000025104	Hdgfl3	0.0196617	0.0183949	-0.0884114	0.0178976	0.353	0.446	1	0
ENSMUSG00000040359	Ufl1	0.0197837	0.00757803	-0.0982211	0.0021454	0.211	0.286	1	0
ENSMUSG00000054237	Fra10ac1	0.0198048	0.0214233	-0.0656508	0.0189799	0.105	0.168	1	0
ENSMUSG00000036620	Mgat4b	0.0199582	0.0112671	0.0744239	0.00227964	0.151	0.094	1	0
ENSMUSG00000027575	Arfgap1	0.0200559	0.00814422	-0.11816	0.00892907	0.1835	0.249	1	0
ENSMUSG00000025907	Rb1cc1	0.020092	0.021168	-0.105243	0.0257057	0.4355	0.541	1	0
ENSMUSG00000034021	Pds5b	0.0201049	0.00528399	-0.107415	0.00328548	0.407	0.504	1	0
ENSMUSG00000041670	Rims1	0.0201448	0.00169138	-0.12792	0.00822396	0.8465	0.892	1	0	SFARI;EAGLE		Moderate	11.35	Discordant	1	0
ENSMUSG00000037876	Jmjd1c	0.020164	0.0165891	-0.120742	0.018673	0.6365	0.703	1	0	SFARI					2	0
ENSMUSG00000019877	Serinc1	0.0201725	0.00577471	0.139952	0.00173052	0.39	0.32	1	0
ENSMUSG00000027475	Kif3b	0.0202299	0.0237859	-0.0886282	0.0170637	0.093	0.152	1	0
ENSMUSG00000042050	Dync2i1	0.0202765	0.000684586	-0.0804386	0	0.121	0.181	1	0
ENSMUSG00000029211	Gabra4	0.0202862	0.0138702	-0.106652	0.011314	0.755	0.835	1	0	SFARI					2	0
ENSMUSG00000060301	2610008E11Rik	0.020324	0.0166419	-0.0859786	0.0185485	0.1365	0.202	1	0
ENSMUSG00000007892	Rplp1	0.0203428	0.0129116	0.169594	0.0120932	0.365	0.299	1	0
ENSMUSG00000021497	Txndc15	0.0203495	0.0189567	-0.0769008	0.0166266	0.1115	0.173	1	0
ENSMUSG00000036790	Slitrk2	0.0203892	0.0157934	-0.0876753	0.00946772	0.113	0.173	1	0	SFARI						1
ENSMUSG00000002227	Mov10	0.0204143	0.00529467	-0.0571147	0.00484628	0.0905	0.147	1	0
ENSMUSG00000052794	1700030K09Rik	0.020436	0.00619796	-0.0659875	0.00502533	0.0565	0.102	1	0
ENSMUSG00000020170	Frs2	0.0204656	0.00892767	-0.0818246	0.0104416	0.2255	0.307	1	0
ENSMUSG00000097305	Gm17276	0.0204741	0.0181532	-0.110549	0.015575	0.181	0.249	1	0
ENSMUSG00000048661	Lemd3	0.0204877	0.0146115	0.152862	0.0320292	0.2965	0.228	1	0	SFARI					2	0
ENSMUSG00000039536	Stau1	0.0206348	0.020302	-0.0660881	0.0116589	0.121	0.186	1	0
ENSMUSG00000003814	Calr	0.020645	0.0160113	0.144939	0.00750106	0.3215	0.255	1	0
ENSMUSG00000052516	Robo2	0.020756	0.00900774	-0.133678	0.0106393	0.9635	0.982	1	0	SFARI					2	0
ENSMUSG00000030515	Tarsl2	0.0208872	0.012035	-0.0954149	0.00709254	0.119	0.178	1	0
ENSMUSG00000026839	Upp2	0.0209119	0.0120785	-0.112411	0.00375742	0.332	0.415	1	0
ENSMUSG00000035189	Ano4	0.0209783	0.0262759	-0.0662897	0.023948	0.0695	0.126	1	0
ENSMUSG00000040430	Pitpnc1	0.0210013	0.00248628	-0.123604	0.00822035	0.4015	0.48	1	0
ENSMUSG00000028771	Ptpn12	0.0210144	0.0112384	-0.109518	0.0229685	0.294	0.375	1	0
ENSMUSG00000044813	Shb	0.0210333	0.00766979	-0.0639392	0.0064498	0.1915	0.268	1	0
ENSMUSG00000022476	Polr3h	0.0210533	0.0113197	-0.089665	0.00688511	0.14	0.205	1	0
ENSMUSG00000042500	Ago4	0.0210578	0.00737737	-0.087472	0.00728674	0.3125	0.402	1	0	SFARI					2	0
ENSMUSG00000039004	Bmp6	0.0210793	0.0225969	-0.181183	0.0138797	0.127	0.192	1	0
ENSMUSG00000026020	Nop58	0.0210817	0.000656714	-0.0761631	0.00235326	0.121	0.181	1	0
ENSMUSG00000037486	Asxl2	0.0211613	0.0160255	-0.100202	0.0199146	0.328	0.415	1	0
ENSMUSG00000028034	Fubp1	0.0212011	0.00533908	-0.070693	0.0187451	0.521	0.63	1	0
ENSMUSG00000003134	Tbc1d8	0.0212807	0.0155805	-0.116298	0.0217348	0.547	0.635	1	0
ENSMUSG00000048799	Cep120	0.021427	0.0186701	-0.0770364	0.0071422	0.1065	0.165	1	0
ENSMUSG00000020387	Jade2	0.0214388	0.0257517	-0.0763126	0.0172283	0.08	0.136	1	0
ENSMUSG00000097797	Gm26901	0.021475	0.00599881	-0.0792686	0.00960138	0.1035	0.16	1	0
ENSMUSG00000056310	Tyw1	0.0215776	0.0180194	-0.0720212	0.0142347	0.1075	0.168	1	0
ENSMUSG00000024293	Esco1	0.0217369	0.00138713	-0.0929256	0.00208831	0.235	0.31	1	0
ENSMUSG00000074579	Lekr1	0.0218114	0.0304908	-0.10801	0.0480963	0.139	0.218	1	0
ENSMUSG00000038240	Pdss2	0.0218826	0.016756	-0.081783	0.00881335	0.1745	0.247	1	0
ENSMUSG00000021911	Parg	0.0218856	0.0235719	-0.113842	0.0285658	0.2595	0.341	1	0
ENSMUSG00000022191	Drosha	0.0218975	0.00978429	-0.0945055	0.0153407	0.1835	0.255	1	0
ENSMUSG00000022272	Myo10	0.0219076	0.0119302	-0.0666292	0.00507533	0.055	0.1	1	0
ENSMUSG00000032342	Mto1	0.0220253	0.00989567	-0.0412227	0	0.0685	0.118	1	0
ENSMUSG00000030894	Tpp1	0.0220803	0.0285722	-0.0859611	0.024061	0.096	0.157	1	0
ENSMUSG00000085084	4930570G19Rik	0.0222043	0.0284858	-0.0869984	0.0173962	0.0735	0.129	1	0
ENSMUSG00000085449	Gm15520	0.0223506	0.0284623	-0.072456	0.0286039	0.0865	0.147	1	0
ENSMUSG00000046032	Snx12	0.0223847	0.0243451	-0.0832541	0.0186332	0.1245	0.189	1	0
ENSMUSG00000030643	Rab30	0.0224014	0.0291333	-0.120682	0.0439043	0.307	0.391	1	0
ENSMUSG00000035232	Pdk3	0.022462	0.0104283	-0.0805002	0.0114753	0.147	0.213	1	0
ENSMUSG00000021929	Kpna3	0.0225234	0.0123618	-0.0821738	0.0119549	0.2715	0.354	1	0
ENSMUSG00000021413	Prpf4b	0.0226026	0.00158932	-0.0945646	0.0104512	0.6655	0.782	1	0
ENSMUSG00000048142	Nat8l	0.0226256	0.0100942	0.076667	0.00960138	0.1025	0.058	1	0
ENSMUSG00000027014	Cwc22	0.022678	0.0171509	-0.0903996	0.00879436	0.1795	0.252	1	0
ENSMUSG00000031987	Egln1	0.0227129	0.0126004	-0.0631704	0.0123356	0.0735	0.123	1	0
ENSMUSG00000039206	Daglb	0.0227476	0.01985	-0.0788692	0.0170637	0.092	0.147	1	0
ENSMUSG00000030583	Sipa1l3	0.0227951	0.00751208	-0.0903423	0.0022347	0.168	0.234	1	0
ENSMUSG00000038630	Zkscan16	0.0228381	0.0297337	-0.0816339	0.0266244	0.096	0.157	1	0
ENSMUSG00000030629	Zfand6	0.0229382	0.027273	-0.0629501	0.0286709	0.0985	0.16	1	0
ENSMUSG00000020720	Psmd12	0.0229536	0.0117847	-0.0624384	0.00501298	0.063	0.11	1	0	SFARI;EAGLE		Limited	6	Discordant	1	1
ENSMUSG00000028637	Ccdc30	0.0229826	0.00926477	-0.056831	0.00862702	0.1785	0.247	1	0
ENSMUSG00000020354	Sgcd	0.0230229	0.00484228	-0.112802	0.00886533	0.539	0.638	1	0
ENSMUSG00000040325	Dcaf1	0.0231231	0.0189712	-0.0960701	0.0223768	0.2555	0.336	1	0
ENSMUSG00000024873	Cnih2	0.0232088	0.023002	0.107102	0.0177035	0.1745	0.115	1	0
ENSMUSG00000064043	Trerf1	0.0232454	0.027932	-0.0990566	0.0385004	0.709	0.822	1	0
ENSMUSG00000034674	Tdg	0.0234004	0.0237144	-0.057685	0.0146785	0.08	0.134	1	0
ENSMUSG00000066406	Akap13	0.0234754	0.0135336	-0.0786369	0.0024318	0.093	0.147	1	0
ENSMUSG00000027652	Ralgapb	0.0236379	0.0319686	-0.136554	0.0504766	0.3635	0.454	1	0	SFARI					1	0
ENSMUSG00000094441	Zfp955a	0.0237964	0.0117627	-0.0725864	0.00501298	0.0685	0.115	1	0
ENSMUSG00000006731	B4galnt1	0.0238628	0.00902031	0.0814877	0.00466884	0.1315	0.081	1	0
ENSMUSG00000027011	Ube2e3	0.0238974	0.0248574	-0.105611	0.0261331	0.2515	0.328	1	0
ENSMUSG00000037656	Slc20a2	0.0239427	0.0192102	-0.12216	0.015575	0.185	0.249	1	0
ENSMUSG00000036202	Rif1	0.0239521	0.0114892	-0.0889578	0.0117937	0.1155	0.173	1	0
ENSMUSG00000032384	Csnk1g1	0.0239848	0.0190656	-0.0890293	0.0203253	0.4385	0.551	1	0	SFARI					3	0
ENSMUSG00000023034	Nr4a1	0.0240808	0.0242018	0.219977	0.0183513	0.2965	0.236	1	0
ENSMUSG00000014956	Ppp1cb	0.0242268	0.0140487	-0.0910774	0.0156346	0.2885	0.37	1	0
ENSMUSG00000024462	Gabbr1	0.0242434	0.0293679	0.203594	0.037667	0.584	0.543	1	0
ENSMUSG00000060450	Rnf14	0.0242948	0.00605405	-0.0940941	0.0109107	0.2005	0.27	1	0
ENSMUSG00000039697	Ncoa7	0.0243204	0.0273827	-0.0981067	0.0300843	0.3595	0.457	1	0
ENSMUSG00000091264	Smim13	0.0243503	0.00425207	-0.0537722	0.00234785	0.1065	0.165	1	0
ENSMUSG00000033569	Adgrb3	0.0243626	0.00151456	0.0711208	0.00111842	1	1	1	0
ENSMUSG00000013495	Tmem175	0.0243776	0.0255995	-0.128482	0.0301966	0.211	0.281	1	0
ENSMUSG00000104960	Snhg8	0.0243846	0.022534	-0.0658421	0.010026	0.0605	0.108	1	0
ENSMUSG00000000001	Gnai3	0.0244693	0.0110594	-0.0609722	0.00489276	0.084	0.136	1	0
ENSMUSG00000032849	Abcc4	0.0244891	0.0210159	-0.0807686	0.0146785	0.0865	0.139	1	0
ENSMUSG00000037653	Kctd8	0.0245826	0.0325766	0.175078	0.0381548	0.7125	0.659	1	0
ENSMUSG00000026784	Pdss1	0.024589	0.00369387	-0.0849815	0	0.135	0.197	1	0
ENSMUSG00000041697	Cox6a1	0.0247149	0.000658769	0.23411	0.00826028	0.345	0.289	1	0
ENSMUSG00000006289	Osgep	0.0247975	0.0309534	0.0840529	0.0212291	0.114	0.063	1	0
ENSMUSG00000034557	Zfyve9	0.0248647	0.0169031	-0.0912417	0	0.4095	0.501	1	0
ENSMUSG00000024780	Cdc37l1	0.0249976	0.0201989	-0.0905763	0.0156775	0.164	0.231	1	0
ENSMUSG00000021240	Abcd4	0.0251565	0.0282234	-0.0715913	0.0148207	0.076	0.129	1	0
ENSMUSG00000091476	Catspere2	0.025158	0.0124929	-0.106187	0.0111289	0.323	0.404	1	0
ENSMUSG00000097736	9530059O14Rik	0.0251719	0.0217828	-0.143204	0.0205942	0.845	0.892	1	0
ENSMUSG00000012126	Ubxn11	0.025196	0.0341951	-0.101612	0.0268152	0.0935	0.155	1	0
ENSMUSG00000040725	Hnrnpul1	0.0253631	0.0188936	-0.0821025	0.00955641	0.113	0.171	1	0
ENSMUSG00000050079	Rspry1	0.0253977	0.0171755	-0.115155	0.0104631	0.2405	0.312	1	0
ENSMUSG00000087259	2610035D17Rik	0.0254563	0.00971242	-0.101814	0.00688511	0.1495	0.21	1	0
ENSMUSG00000030930	Chst15	0.0254626	0.00468475	0.0872556	0.0046056	0.143	0.092	1	0
ENSMUSG00000039037	St6galnac5	0.0256108	0.0264313	-0.116934	0.0167614	0.441	0.53	1	0
ENSMUSG00000009291	Pttg1ip	0.0256906	0.0183097	-0.0681541	0.0134526	0.16	0.228	1	0
ENSMUSG00000028519	Dab1	0.025707	0.0119612	-0.135091	0.00243645	0.937	0.948	1	0
ENSMUSG00000056296	Synpr	0.0258974	0.0167757	-0.0966611	0.00764153	0.281	0.365	1	0
ENSMUSG00000030059	Tmf1	0.0259245	0.00462677	-0.0729794	0	0.1035	0.157	1	0
ENSMUSG00000033335	Dnm2	0.0259633	0.0184982	-0.0876113	0.0188339	0.2285	0.304	1	0
ENSMUSG00000037257	Aagab	0.0260291	0.0147094	-0.0700008	0.00707614	0.119	0.178	1	0
ENSMUSG00000058297	Spock2	0.026044	0.0165484	0.133845	0.0217059	0.349	0.281	1	0
ENSMUSG00000037461	Ints7	0.0261305	0.00779648	-0.0776665	0	0.1625	0.228	1	0
ENSMUSG00000039953	Clstn1	0.0261636	0.0219277	0.155956	0.033555	0.4445	0.375	1	0
ENSMUSG00000055334	Snupn	0.0261807	0.00774137	-0.074544	0.00754731	0.0565	0.1	1	0
ENSMUSG00000030835	Nomo1	0.026209	0.0106464	0.0730182	0.0117124	0.1315	0.081	1	0
ENSMUSG00000023923	Tbc1d5	0.0263506	0.0173164	-0.116377	0.00380886	0.6025	0.688	1	0	SFARI					2	0
ENSMUSG00000061665	Cd2ap	0.026377	0.0130104	-0.0883203	0.0126952	0.3515	0.441	1	0
ENSMUSG00000029403	Cdkl2	0.0263983	0.0157775	-0.078345	0.0045542	0.155	0.22	1	0
ENSMUSG00000047248	C2cd3	0.026575	0.0119298	-0.0867939	0.0023002	0.148	0.21	1	0
ENSMUSG00000020818	Mfsd11	0.0265933	0.00572416	-0.0683564	0.00241453	0.0955	0.15	1	0
ENSMUSG00000035437	Rabgap1	0.0266654	0.00654599	-0.106282	0.00472652	0.4595	0.549	1	0
ENSMUSG00000019809	Pex3	0.0266917	0.00879701	-0.0800813	0	0.1365	0.197	1	0
ENSMUSG00000036977	Anapc10	0.0267285	0.0354343	-0.0974963	0.0338948	0.1575	0.231	1	0
ENSMUSG00000045106	Ccdc73	0.0268143	0.0105267	-0.0852789	0.00477818	0.1125	0.168	1	0
ENSMUSG00000060149	BC002059	0.0268184	0.0175389	-0.0643181	0.0146785	0.083	0.134	1	0
ENSMUSG00000029234	Tmem165	0.026891	0.00696752	-0.0461292	0.0114239	0.1275	0.192	1	0
ENSMUSG00000074165	Zfp788	0.0268986	0.0129411	-0.0649064	0.00988036	0.0815	0.131	1	0
ENSMUSG00000042810	Krba1	0.0269751	0.010825	-0.0721983	0.00697932	0.1315	0.192	1	0
ENSMUSG00000027806	Tsc22d2	0.0269925	0.0262061	-0.0761979	0.012291	0.2285	0.31	1	0
ENSMUSG00000038121	Fam210a	0.0270231	0.0190791	-0.0731674	0.0023587	0.113	0.171	1	0
ENSMUSG00000036257	Pnpla8	0.0270267	0.00552078	-0.0903082	0.0119783	0.257	0.339	1	0
ENSMUSG00000041658	Rragb	0.0270361	0.0261619	-0.0759138	0.00734797	0.0775	0.129	1	0
ENSMUSG00000096910	Zfp955b	0.0271014	0.00720492	-0.0680901	0.00252823	0.059	0.102	1	0
ENSMUSG00000041915	Ammecr1l	0.0271052	0.0316196	-0.0706945	0.0174814	0.0655	0.115	1	0
ENSMUSG00000027778	Ift80	0.0271328	0.00395047	-0.0813245	0.00241453	0.1065	0.16	1	0
ENSMUSG00000033790	Tubgcp5	0.0271626	0.0132391	-0.0913189	0.00677836	0.172	0.236	1	0	SFARI					2	0
ENSMUSG00000039001	Rps21	0.0271669	0.0335905	0.0850988	0.0292683	0.2325	0.16	1	0
ENSMUSG00000036167	Pphln1	0.0272811	0.00736622	-0.0716174	0.00724362	0.101	0.155	1	0
ENSMUSG00000028854	Slc9a1	0.0272848	0.0138362	-0.0494246	0.00646342	0.1745	0.247	1	0
ENSMUSG00000030000	Add2	0.0272874	0.0231941	-0.0996288	0.023186	0.42	0.509	1	0
ENSMUSG00000064036	Mro	0.0273153	0.030959	-0.0803653	0.0173962	0.071	0.121	1	0
ENSMUSG00000045576	St7l	0.0274766	0.0215912	-0.0769615	0.0330438	0.23	0.307	1	0
ENSMUSG00000058587	Tmod3	0.0275508	0.0239992	-0.0762365	0.00225945	0.144	0.207	1	0
ENSMUSG00000001576	Ergic1	0.0275856	0.0371892	-0.103547	0.0378652	0.235	0.32	1	0
ENSMUSG00000021012	Zc3h14	0.0276999	0.0125314	-0.0894982	0	0.2625	0.336	1	0
ENSMUSG00000028218	Cibar1	0.0277164	0.01831	-0.0601584	0.0200252	0.167	0.236	1	0
ENSMUSG00000027546	Atp9a	0.0277804	0.0102036	0.166778	0.0017819	0.358	0.302	1	0
ENSMUSG00000002949	Timm44	0.0278075	0.012689	-0.0981399	0.0141548	0.265	0.339	1	0
ENSMUSG00000037685	Atp8a1	0.0278085	0.0249514	-0.105723	0.011007	0.7295	0.824	1	0
ENSMUSG00000034544	Rsrc1	0.0278851	0.0164167	-0.0901724	0.00981855	0.2795	0.354	1	0	SFARI						1
ENSMUSG00000090069	E430024P14Rik	0.0279449	0.0363096	-0.0789433	0.0268152	0.093	0.152	1	0
ENSMUSG00000038248	Sobp	0.0279899	0.00740415	-0.0915493	0.00252198	0.059	0.102	1	0
ENSMUSG00000087174	5530601H04Rik	0.0280438	0.0053802	-0.079495	0.0023587	0.122	0.178	1	0
ENSMUSG00000042064	Myo3b	0.0280846	0.00267868	-0.138573	0.00822698	0.199	0.265	1	0
ENSMUSG00000031870	Pgr	0.0280905	0.0016671	-0.0798048	0.00483479	0.1	0.152	1	0
ENSMUSG00000063446	Plppr1	0.0281535	0.0317997	-0.138419	0.0363229	0.7005	0.79	1	0
ENSMUSG00000029705	Cux1	0.0283071	0.00165675	-0.120497	0.00987239	0.437	0.509	1	0	SFARI					2	0
ENSMUSG00000063568	Jazf1	0.0283613	0.020974	-0.115243	0.0151135	0.408	0.486	1	0
ENSMUSG00000048445	Ccdc57	0.0284622	0.0228857	-0.0775973	0.0115011	0.1485	0.213	1	0
ENSMUSG00000061313	Ddhd2	0.0284908	0.0127764	-0.0974339	0.00814487	0.2585	0.333	1	0	SFARI					2	0
ENSMUSG00000059142	Zfp945	0.02852	0.0157254	-0.0831977	0.00465818	0.138	0.197	1	0
ENSMUSG00000006005	Tpr	0.028608	0.0016789	-0.0818608	0.00384234	0.291	0.37	1	0
ENSMUSG00000023912	Slc25a27	0.0287928	0.0321149	-0.0766294	0.0181992	0.249	0.333	1	0	SFARI					2	0
ENSMUSG00000065954	Tacc1	0.0288099	0.00423274	-0.11628	0.00489276	0.445	0.517	1	0
ENSMUSG00000036452	Arhgap26.1	0.0288221	0.027843	-0.116976	0.0281651	0.463	0.559	1	0
ENSMUSG00000046364	Rpl27a	0.0288222	0.0315174	0.111505	0.0133937	0.1605	0.105	1	0
ENSMUSG00000035864	Syt1	0.0288357	0.00230324	-0.0875152	0.0024656	0.9925	0.992	1	0	SFARI;TADA	0.016653					1
ENSMUSG00000063808	Gpatch1	0.0288699	0.0294206	-0.0703324	0.0124257	0.0695	0.118	1	0
ENSMUSG00000035933	Cog5	0.0290154	0.028504	-0.114481	0.011231	0.3375	0.412	1	0
ENSMUSG00000031816	Mthfsd	0.0290185	0.0216274	-0.0646843	0.00758471	0.056	0.1	1	0
ENSMUSG00000021264	Yy1	0.0290562	0.0328707	-0.101472	0.0165113	0.1285	0.189	1	0	SFARI					1	1
ENSMUSG00000020064	Herc4	0.0291683	0.0178321	-0.0871816	0.0218922	0.18	0.247	1	0
ENSMUSG00000037196	Pacrg	0.0292939	0.0224214	-0.0830216	0.00236966	0.1025	0.157	1	0
ENSMUSG00000021916	Glt8d1	0.0293464	0.0137247	-0.0890259	0.00660287	0.177	0.241	1	0
ENSMUSG00000020700	Map3k3	0.0294432	0.0406385	-0.0384825	0.0645984	0.318	0.417	1	0
ENSMUSG00000079177	Fam228a	0.0294472	0.020929	-0.057274	0.00751026	0.064	0.11	1	0
ENSMUSG00000001542	Ell2	0.0295044	0.0397956	-0.136631	0.0404514	0.164	0.236	1	0
ENSMUSG00000021466	Ptch1	0.0295604	0.0275405	0.118147	0.033634	0.3465	0.276	1	0
ENSMUSG00000032279	Idh3a	0.0296448	0.0145708	-0.0636051	0.00745538	0.0735	0.121	1	0
ENSMUSG00000097466	D430036J16Rik	0.0296831	0.0252862	-0.0898977	0.0161017	0.143	0.205	1	0
ENSMUSG00000068917	Clk2	0.0297044	0.0156038	-0.0656331	0.00694763	0.14	0.202	1	0
ENSMUSG00000033871	Ppargc1b	0.0297198	0.016167	-0.0838479	0.00968801	0.2965	0.381	1	0
ENSMUSG00000045205	Dpy19l4	0.0297532	0.0183212	-0.0682728	0.00449401	0.1495	0.21	1	0
ENSMUSG00000003153	Slc2a3	0.0297827	0.013369	-0.113767	0.0119549	0.277	0.349	1	0
ENSMUSG00000042496	Prdm10	0.0298392	0.0206455	-0.0881411	0.0112724	0.155	0.218	1	0
ENSMUSG00000073274	Gm14636	0.0299318	0.0308364	-0.053498	0.0124257	0.0665	0.115	1	0
ENSMUSG00000026240	Cops7b	0.0300623	0	-0.0622843	0	0.066	0.11	1	0
ENSMUSG00000041565	L3mbtl4	0.0300649	0.00810603	-0.0631128	0.00960138	0.0905	0.142	1	0
ENSMUSG00000099401	Gm28375	0.0300861	0.034675	-0.066889	0.0458567	0.1285	0.192	1	0
ENSMUSG00000078578	Ube2d3	0.0300873	0.00767993	-0.0839872	0.00194127	0.2845	0.365	1	0
ENSMUSG00000000538	Tom1l2	0.0301069	0.0146886	-0.0663272	0.0126727	0.3375	0.436	1	0
ENSMUSG00000055866	Per2	0.030214	0.00580745	-0.0749912	0.00694763	0.13	0.189	1	0	SFARI;EAGLE		Moderate	6.75	Concordant	2	0
ENSMUSG00000007411	Mark3	0.0303148	0.00295742	-0.0999104	0.0105559	0.499	0.583	1	0
ENSMUSG00000033478	Fhip2a	0.0303435	0	-0.0630404	0	0.058	0.1	1	0
ENSMUSG00000053333	Dis3l2	0.0304764	0.0318117	-0.0912331	0.0221778	0.328	0.417	1	0
ENSMUSG00000004071	Cdip1	0.0305486	0.0230204	-0.0794471	0.00855468	0.207	0.281	1	0
ENSMUSG00000051951	Xkr4	0.0306222	0.0111857	-0.0726524	0.00638587	0.8255	0.903	1	0
ENSMUSG00000018372	Cep95	0.0306361	0.00537489	-0.0632424	0	0.1035	0.157	1	0
ENSMUSG00000070822	Zscan18	0.0307548	0.0388723	-0.0660531	0.0201019	0.059	0.108	1	0
ENSMUSG00000012117	Dhdds	0.0307736	0.026333	-0.0808336	0.0141035	0.1295	0.189	1	0
ENSMUSG00000026313	Hdac4	0.0307923	0.0312752	-0.0747301	0.0259922	0.185	0.257	1	0	SFARI					2	1
ENSMUSG00000040022	Rab11fip2	0.0308943	0.0220765	-0.0746642	0.0191083	0.2125	0.289	1	0
ENSMUSG00000031309	Rps6ka3	0.0308966	0.0202414	-0.0848272	0.0148207	0.731	0.806	1	0	SFARI					2	1
ENSMUSG00000038773	Kdm3b	0.0309859	0.0237465	-0.0876814	0.0164875	0.2505	0.328	1	0	SFARI;EAGLE		Limited	1.5	Discordant	1	1
ENSMUSG00000026048	Ercc5	0.0310227	0.0154109	-0.0668119	0.0023587	0.119	0.176	1	0
ENSMUSG00000002957	Ap2a2	0.0310601	0.025442	-0.0920751	0.01629	0.257	0.333	1	0
ENSMUSG00000032228	Tcf12	0.0311419	0.0251522	-0.0993565	0.0285087	0.534	0.648	1	0
ENSMUSG00000043542	Zc2hc1a	0.0311821	0.0223602	-0.0854345	0.0117394	0.1285	0.186	1	0
ENSMUSG00000024220	Zfp523	0.0313873	0.0325466	-0.0929414	0.0135719	0.1625	0.228	1	0
ENSMUSG00000028883	Sema3a	0.031413	0.0340905	-0.0844969	0.0245829	0.257	0.336	1	0
ENSMUSG00000031099	Smarca1	0.0314446	0.00868396	-0.115311	0.0101845	0.403	0.478	1	0
ENSMUSG00000035329	Fbxo33	0.0314945	0.0237944	-0.0442515	0.00705982	0.0995	0.155	1	0	SFARI					2	0
ENSMUSG00000050310	Rictor	0.0315501	0.0224972	-0.0697236	0.00918224	0.34	0.425	1	0
ENSMUSG00000033623	Pcgf3	0.031554	0.0254689	-0.0560599	0.00734797	0.0785	0.129	1	0
ENSMUSG00000084908	C79798	0.0316766	0.0421492	-0.0934011	0.0215278	0.1035	0.165	1	0
ENSMUSG00000099013	Gm27153	0.0316966	9.90786e-05	-0.0642086	0.00250957	0.058	0.1	1	0
ENSMUSG00000053774	Ubxn7	0.0317237	0.0208014	-0.0645647	0.00466884	0.118	0.176	1	0
ENSMUSG00000021993	Mipep	0.0317655	0.0230043	-0.0643722	0.00754731	0.059	0.102	1	0
ENSMUSG00000047213	Ythdf3	0.0318451	0.0236481	-0.066439	0.0219031	0.4005	0.496	1	0
ENSMUSG00000014592	Camta1	0.0319014	0.0402864	-0.11347	0.0386688	0.491	0.585	1	0
ENSMUSG00000032498	Mlh1	0.0319824	0.0149997	-0.0731291	0.00246709	0.0785	0.126	1	0
ENSMUSG00000020454	Eif4enif1	0.0320561	0.0129253	-0.072816	0.00480067	0.0995	0.152	1	0
ENSMUSG00000037287	Tbcel	0.0320829	0.0057659	-0.07515	0.00232114	0.1375	0.197	1	0	TADA	0.0113737
ENSMUSG00000024393	Prrc2a	0.0322065	0.000701818	0.0947943	0.0044743	0.168	0.115	1	0
ENSMUSG00000028837	Psmb2	0.0322625	0.0151105	-0.0839856	0.00643623	0.224	0.294	1	0
ENSMUSG00000006932	Ctnnb1	0.032504	0.00376833	0.0926185	0.0020798	0.235	0.173	1	0	SFARI;EAGLE;TADA	5.54e-05	Definitive	32.75	Concordant	1	0
ENSMUSG00000035640	Cbarp	0.0325745	0.00612648	0.102918	0.0264986	0.257	0.194	1	0
ENSMUSG00000034667	Xpot	0.0326212	0.0319137	-0.0753804	0.0142679	0.118	0.176	1	0
ENSMUSG00000030659	Nucb2	0.032632	0.0333353	-0.0898762	0.017476	0.1885	0.257	1	0
ENSMUSG00000015597	Zfp318	0.0326559	0.00962919	0.0867085	0.00425059	0.2205	0.16	1	0
ENSMUSG00000020982	Nemf	0.0326633	0.025764	-0.10402	0.0187953	0.231	0.299	1	0
ENSMUSG00000033909	Usp36	0.032694	0.014701	-0.0689269	0.0116058	0.139	0.199	1	0
ENSMUSG00000017843	Ppp2r5c	0.0327878	0.0358777	-0.082562	0.0240044	0.336	0.436	1	0
ENSMUSG00000038538	Ubn2	0.0329287	1.03695e-05	-0.10206	0.0120585	0.6525	0.73	1	0	SFARI					2	0
ENSMUSG00000062070	Pgk1	0.0329992	0.0293111	-0.0634048	0.00964678	0.0985	0.152	1	0
ENSMUSG00000022105	Rb1	0.0330356	0.0144745	-0.0658949	0.00635603	0.198	0.268	1	0
ENSMUSG00000009741	Ubp1	0.0330446	0.014576	-0.0618777	0.0148928	0.332	0.42	1	0
ENSMUSG00000038215	Cep44	0.033049	0.00709218	-0.0791881	0.00244932	0.0905	0.139	1	0
ENSMUSG00000058351	Smim4	0.0331751	0.045083	-0.0824171	0.0287382	0.105	0.168	1	0
ENSMUSG00000027288	Zfp106	0.0332239	0.0121067	-0.0790133	0.00208831	0.232	0.304	1	0
ENSMUSG00000024335	Brd2	0.0332562	0.0166293	0.127353	0.0123157	0.243	0.184	1	0
ENSMUSG00000025078	Nhlrc2	0.0332736	0.0116235	-0.0750281	0.00242026	0.097	0.147	1	0
ENSMUSG00000112964	E430024I08Rik	0.033281	0.0435891	-0.0675674	0.0275392	0.0625	0.113	1	0
ENSMUSG00000032571	Pik3r4	0.0332828	0.0148717	-0.0614048	0.00492822	0.0785	0.126	1	0
ENSMUSG00000041570	Camsap2	0.0332879	0.0138224	-0.0520599	0.0211137	0.291	0.381	1	0
ENSMUSG00000061787	Rps17	0.0333253	0.0374559	0.0691593	0.0209865	0.1365	0.084	1	0
ENSMUSG00000026077	Npas2	0.0333338	0.0142316	-0.0730856	0.00432722	0.6785	0.785	1	0	SFARI					2	0
ENSMUSG00000040151	Hs2st1	0.0334672	0.0279927	-0.0692109	0.0193314	0.369	0.465	1	0
ENSMUSG00000038302	Afg1l	0.0334741	0	-0.095496	0	0.173	0.234	1	0
ENSMUSG00000059070	Rpl18	0.0334767	0.0393632	0.074863	0.0329106	0.1205	0.071	1	0
ENSMUSG00000018433	Nol11	0.0335655	0.0426362	-0.0819719	0.021887	0.096	0.152	1	0
ENSMUSG00000021838	Samd4	0.0335947	0.017627	-0.0642173	0.00752874	0.0575	0.1	1	0
ENSMUSG00000063646	Jakmip1	0.0336417	0.00647282	-0.112176	0.012972	0.336	0.409	1	0
ENSMUSG00000016200	Syt14	0.0336592	0.0410285	-0.101746	0.0261254	0.583	0.688	1	0
ENSMUSG00000085265	Nell1os	0.0337513	0.032688	-0.0649064	0.00988036	0.0745	0.123	1	0
ENSMUSG00000034898	Filip1	0.0337885	0.019741	-0.0717477	0.00212308	0.206	0.278	1	0
ENSMUSG00000048874	Phf3	0.0338358	0.0348262	-0.102168	0.0364374	0.345	0.433	1	0	SFARI;EAGLE;TADA	0.00626539	Moderate	9.75	Discordant	1	0
ENSMUSG00000033486	Catsper2	0.0338373	0.0152788	-0.0603737	0.00249118	0.0685	0.113	1	0
ENSMUSG00000017639	Rab11fip4	0.0338498	0.00780895	-0.0732024	0.00225945	0.1575	0.218	1	0
ENSMUSG00000031697	Orc6	0.0339195	0.000949194	-0.0614048	0.00492822	0.081	0.129	1	0
ENSMUSG00000105218	Gm38413	0.0339646	0.038443	-0.0860304	0.0416441	0.2785	0.357	1	0
ENSMUSG00000022180	Slc7a8	0.0339947	0.0266345	-0.126054	0.00866366	0.1915	0.255	1	0
ENSMUSG00000029528	Pxn	0.0340289	0	-0.0557633	0	0.06	0.102	1	0
ENSMUSG00000052105	Mtcl1	0.0340819	0.00550524	-0.0860673	0.0106265	0.6735	0.759	1	0
ENSMUSG00000038481	Cdk19	0.0341425	0.00702427	-0.128798	0.00184975	0.3205	0.388	1	0	SFARI					3	1
ENSMUSG00000025085	Ablim1	0.0341985	0.0209142	-0.0724952	0.00955641	0.096	0.147	1	0
ENSMUSG00000030590	Fam98c	0.0342307	0.0418016	0.0744864	0.0251335	0.1575	0.1	1	0	SFARI					2	0
ENSMUSG00002075217	ENSMUSG00002075217	0.0342742	0.00366744	0.0913675	0.0178976	0.173	0.121	1	0
ENSMUSG00000039840	Epg5	0.0342897	0.0407972	-0.0860102	0.0241594	0.173	0.244	1	0
ENSMUSG00000029126	Nsg1	0.0342961	0.0135638	0.142635	0.00362395	0.348	0.289	1	0
ENSMUSG00000027394	Ttl	0.0343233	0.0394079	-0.0723264	0.0170637	0.0905	0.144	1	0
ENSMUSG00000117284	Gm7072	0.034612	0.00699274	-0.0682252	0	0.0775	0.123	1	0
ENSMUSG00000022797	Tfrc	0.034628	0.0257656	-0.0953256	0.019895	0.176	0.239	1	0
ENSMUSG00000041220	Elovl6	0.0349244	0.0243575	-0.0874123	0.0156432	0.176	0.239	1	0
ENSMUSG00000039145	Camk1d	0.0350618	0.0225046	0.188239	0.0174985	0.92	0.924	1	0
ENSMUSG00000028243	Ubxn2b	0.0351043	0.0299851	-0.0892755	0.00685427	0.1575	0.218	1	0
ENSMUSG00000022679	Mpv17l	0.0352708	0.0132788	-0.0723142	0	0.1105	0.163	1	0
ENSMUSG00000028221	Pip4p2	0.0352844	0.0318911	-0.113568	0.018056	0.168	0.228	1	0
ENSMUSG00000022358	Fbxo32	0.0353646	0.00844641	-0.0708118	0.00250341	0.0695	0.113	1	0
ENSMUSG00000031561	Tenm3	0.0353651	0.0274266	0.248569	0.00404657	0.6995	0.669	1	0
ENSMUSG00000032897	Nfyc	0.035368	0.0149405	-0.0999011	0.00384959	0.315	0.388	1	0
ENSMUSG00000026999	Nup35	0.035443	0.00383495	-0.0682012	0.00630366	0.198	0.262	1	0
ENSMUSG00000024317	Rnf138	0.0354889	0.00430836	-0.0829894	0	0.177	0.239	1	0
ENSMUSG00000002102	Psmc3	0.0355582	0.021303	0.102216	0.00664588	0.173	0.121	1	0
ENSMUSG00000039768	Dnajc11	0.0355785	0.0274328	-0.0682228	0.0120443	0.0995	0.152	1	0
ENSMUSG00000027457	Snph	0.0355948	0.00824927	-0.0796664	0.0105278	0.2245	0.291	1	0
ENSMUSG00000042015	Wdr41	0.0355965	0.00345832	-0.0520098	0.00935914	0.123	0.181	1	0
ENSMUSG00000036155	Mgat5	0.0356012	0.0109267	-0.0814309	0.0043877	0.181	0.244	1	0
ENSMUSG00000021496	Pcbd2	0.0357085	0.0378156	-0.0677883	0.0125789	0.0565	0.1	1	0
ENSMUSG00000028300	C9orf72	0.0358572	0.0407797	-0.0719905	0.0169825	0.093	0.147	1	0
ENSMUSG00000033526	Ppip5k1	0.0359433	0.0420113	-0.0814586	0.0430977	0.3095	0.399	1	0
ENSMUSG00000026753	Ppp6c	0.0361084	0.0369549	-0.0789547	0.0191132	0.1075	0.163	1	0
ENSMUSG00000024201	Kdm4b	0.0361657	0.0276707	-0.0921016	0.018056	0.2715	0.346	1	0	SFARI					2	0
ENSMUSG00000033792	Atp7a	0.0362395	0.0177135	-0.0609885	0.0071422	0.0895	0.139	1	0
ENSMUSG00000028954	Nub1	0.0364125	0.0385455	-0.0856517	0.0240558	0.1885	0.257	1	0
ENSMUSG00000021066	Atl1	0.0364192	0.0380332	-0.101357	0.0206096	0.248	0.32	1	0
ENSMUSG00000060923	Acyp2	0.03645	0.0115323	-0.0957229	0.0215152	0.323	0.404	1	0
ENSMUSG00000031932	Gpr83	0.036566	0.0218844	-0.0753766	0.0024318	0.0905	0.139	1	0
ENSMUSG00000041236	Vps41	0.0366649	0.0392757	-0.106881	0.0298417	0.3295	0.409	1	0
ENSMUSG00000031833	Mast3	0.0367031	0.0480488	0.211637	0.0535555	0.5015	0.451	1	0	SFARI					3	0
ENSMUSG00000037111	Setd7	0.0368734	0.00551298	-0.0811629	0	0.13	0.184	1	0
ENSMUSG00000004931	Apba3	0.0369071	0.00694166	0.0729315	0	0.101	0.06	1	0
ENSMUSG00000000416	Cttnbp2	0.0369081	0.0241316	-0.134031	0.00902784	0.869	0.913	1	0	SFARI					2	0
ENSMUSG00000079020	Slc45a4	0.0369739	0.0263091	-0.0606899	0.0125172	0.064	0.108	1	0
ENSMUSG00000040537	Adam22	0.0370166	0.0417767	-0.113056	0.0313556	0.676	0.748	1	0
ENSMUSG00000047412	Zbtb44	0.0371451	0.023235	-0.0714685	0.0120443	0.101	0.152	1	0
ENSMUSG00000052934	Fbxo31	0.0371598	0	-0.0659831	0	0.066	0.108	1	0
ENSMUSG00000037605	Adgrl3	0.0371774	0.0469342	-0.0964401	0.0272053	0.996	0.997	1	0
ENSMUSG00000020903	Stx8	0.0371828	0.00412853	-0.0683945	0.00660287	0.178	0.241	1	0
ENSMUSG00000097342	Gm26618	0.0371908	0.00179254	-0.0722401	0.00498847	0.066	0.108	1	0
ENSMUSG00000034488	Edil3	0.0372437	0.0158154	-0.111437	0.0209913	0.2035	0.268	1	0
ENSMUSG00000018427	Ypel2	0.0372481	0.0228624	-0.0812667	0.0124409	0.47	0.559	1	0
ENSMUSG00000087475	4933406I18Rik	0.0372674	0.00892052	-0.0748256	0.00693189	0.13	0.186	1	0
ENSMUSG00000086993	Rsf1os2	0.0372728	0.0148718	-0.0629559	0.0047894	0.097	0.147	1	0
ENSMUSG00000037151	Lrrc20	0.0373729	0.00984625	-0.05623	0.0143013	0.0985	0.15	1	0
ENSMUSG00000033712	Ccar2	0.0373943	0.0345469	-0.0595279	0.00736566	0.08	0.129	1	0
ENSMUSG00000028246	Faxc	0.037403	0.0350762	-0.0605783	0.0145737	0.0905	0.142	1	0
ENSMUSG00000066415	Msl2	0.0374405	0.0348613	-0.0664762	0.0257684	0.1275	0.186	1	0	TADA	0.0720013
ENSMUSG00000033565	Rbfox2	0.037492	0.0246542	-0.0805678	0.0195144	0.707	0.822	1	0
ENSMUSG00000040760	Appl1	0.0375596	0.0433739	-0.0848767	0.023961	0.341	0.433	1	0
ENSMUSG00000015709	Arnt2	0.0376995	0.0243702	-0.101758	0.0111249	0.173	0.234	1	0	SFARI					2	0
ENSMUSG00000004056	Akt2	0.0377688	0.0262717	-0.0775653	0.00719255	0.11	0.163	1	0
ENSMUSG00000015889	Lta4h	0.0378217	0.0340235	-0.0923213	0.0139429	0.147	0.205	1	0
ENSMUSG00000041986	Elmod1	0.0378685	0.0329974	0.107358	0.0184646	0.9305	0.903	1	0
ENSMUSG00000029823	Luc7l2	0.0378754	0.00851166	-0.0920171	0.00247307	0.8135	0.903	1	0
ENSMUSG00000057069	Ero1b	0.0378851	0.0254472	-0.0556332	0.00501298	0.064	0.108	1	0
ENSMUSG00000038502	Ptov1	0.0379249	0.0404159	0.0826362	0.0245291	0.1705	0.115	1	0
ENSMUSG00000030647	Ndufc2	0.0380072	0.00928011	0.0948667	0.00660287	0.1835	0.131	1	0
ENSMUSG00000030533	Unc45a	0.0380374	0.0245765	-0.0723016	0.0121882	0.0905	0.139	1	0
ENSMUSG00000029319	Coq2	0.0380474	0.0237094	-0.0481466	0.0119316	0.104	0.157	1	0
ENSMUSG00000074088	Snrnp40	0.0380751	0.0384722	-0.0613604	0.0245829	0.0775	0.126	1	0
ENSMUSG00000055660	Mettl4	0.0381465	0.00192545	-0.0583376	0.00495214	0.073	0.118	1	0
ENSMUSG00000025626	Phf6	0.0381741	0.0158826	-0.0724551	0.00437829	0.177	0.239	1	0
ENSMUSG00000037990	Sh3rf3	0.0381902	0.00552924	-0.0924273	0.00465464	0.45	0.533	1	0	SFARI					2	0
ENSMUSG00000090120	A730090N16Rik	0.0383469	0	-0.0568459	0	0.094	0.144	1	0
ENSMUSG00000036879	Phkb	0.0383775	0.0468974	-0.12348	0.0468466	0.2955	0.373	1	0
ENSMUSG00000056167	Cnot10	0.0383933	0.0174622	-0.0760424	0.00883243	0.177	0.239	1	0
ENSMUSG00000032599	Ip6k2	0.0384785	0.0265343	-0.0675752	0.0113729	0.1495	0.21	1	0
ENSMUSG00000086316	Nbdy	0.0386381	0.0284353	-0.0597221	0.00957884	0.1025	0.155	1	0
ENSMUSG00000062257	Opcml	0.0386479	0.0408524	-0.116491	0.0304542	0.953	0.976	1	0
ENSMUSG00000017831	Rab5a	0.0387564	0.0416517	-0.0775225	0.0195716	0.0865	0.136	1	0
ENSMUSG00000036769	Wdr44	0.0388985	0.022513	-0.0875638	0.00671884	0.1625	0.223	1	0
ENSMUSG00000000605	Clcn4	0.0389492	0.0162463	0.0925955	0.0064498	0.203	0.147	1	0	SFARI					2	1
ENSMUSG00000084957	Bbip1	0.0390662	0.0301732	-0.0778661	0.0135719	0.164	0.226	1	0
ENSMUSG00000026663	Atf6	0.0390748	0.0321948	-0.098548	0.0299433	0.5225	0.617	1	0
ENSMUSG00000005506	Celf1	0.0391172	0.0141254	-0.10055	0.00165473	0.811	0.879	1	0
ENSMUSG00000024927	Rela	0.0392668	0.00639272	-0.0551019	0.00496419	0.0695	0.113	1	0
ENSMUSG00000035726	Supt16	0.0393712	0.0350493	-0.0991651	0.0181363	0.16	0.22	1	0	SFARI					2	1
ENSMUSG00000085609	1700016P03Rik	0.039407	0.00682985	0.155599	0.0335939	0.2995	0.228	1	0
ENSMUSG00000039318	Rab3gap2	0.039509	0.0475885	-0.0749149	0.0247665	0.319	0.407	1	0
ENSMUSG00000019146	Cacng2	0.0395098	0.0232538	-0.0928012	0.01594	0.2755	0.349	1	0
ENSMUSG00000086128	St8sia3os	0.0396518	0.0293854	-0.0788415	0.0169674	0.2085	0.278	1	0
ENSMUSG00000038324	Trpc4ap	0.0396832	0.0408538	-0.0957578	0.024682	0.2335	0.304	1	0
ENSMUSG00000096914	Galntl6	0.0397199	0.0179726	-0.267799	0.042043	0.9185	0.963	1	0
ENSMUSG00000029063	Nadk	0.0398281	0.0180194	-0.0659182	0.00232643	0.135	0.192	1	0
ENSMUSG00000026634	Angel2	0.0398753	0.0443499	-0.08506	0.0272613	0.226	0.297	1	0
ENSMUSG00000021241	Isca2	0.0398979	0.0164215	-0.0762266	0.00962403	0.1075	0.157	1	0
ENSMUSG00000075232	Amd1	0.0400217	0.0181357	-0.055362	0	0.063	0.105	1	0
ENSMUSG00000028559	Osbpl9	0.0401066	0.00217244	-0.0707551	0.00707205	0.3635	0.446	1	0
ENSMUSG00000031618	Nr3c2	0.0401409	0.00972656	-0.0468072	0.0134472	0.5645	0.669	1	0	SFARI					1	1
ENSMUSG00000035790	Cep19	0.040159	0.0059052	-0.108242	0.0065324	0.1915	0.252	1	0
ENSMUSG00000005362	Crbn	0.0402585	0.00911812	-0.0533198	0.00480067	0.1035	0.155	1	0
ENSMUSG00000042331	Specc1	0.040305	0.0259433	-0.1023	0.00731286	0.3295	0.404	1	0
ENSMUSG00000057863	Rpl36	0.0404684	0.0227674	0.108981	0.00848354	0.21	0.155	1	0
ENSMUSG00000022228	Zscan26	0.0406015	0.0200484	-0.0900135	0.00437829	0.1785	0.241	1	0
ENSMUSG00000032293	Ireb2	0.0406522	0.0380946	-0.108775	0.0157467	0.1745	0.234	1	0
ENSMUSG00000035569	Ankrd11	0.0406972	0.00318261	-0.0873703	0.00734797	0.6395	0.727	1	0	SFARI;EAGLE;TADA	1.58e-05	Definitive	22.6	Concordant	1	1
ENSMUSG00000033720	Sfxn5	0.0409943	0.00323855	-0.0744692	0.00220571	0.185	0.247	1	0
ENSMUSG00000079179	Rab10os	0.0409963	0.0430123	-0.0617658	0.0216803	0.0945	0.147	1	0
ENSMUSG00000021936	Mapk8	0.0409985	0.0163116	-0.0711154	0.00583494	0.29	0.36	1	0
ENSMUSG00000028911	Srsf4	0.0410088	0.0380415	-0.0815939	0.0162854	0.139	0.197	1	0
ENSMUSG00000037104	Socs5	0.041093	0.0459754	-0.0697083	0.0229254	0.1445	0.207	1	0
ENSMUSG00000035247	Hectd1	0.0411285	0.0319418	-0.0486577	0.00945456	0.306	0.388	1	0
ENSMUSG00000007656	Arpp19	0.0412268	0.0305053	0.182293	0.00887635	0.5865	0.567	1	0
ENSMUSG00000025909	Sntg1	0.0412315	0.0471168	-0.12826	0.0301857	0.9225	0.929	1	0
ENSMUSG00000032299	Commd4	0.0412435	0.0296233	0.0792923	0.00948974	0.1075	0.066	1	0
ENSMUSG00000042750	Bex2	0.0413581	0.0178546	0.110247	0.00634286	0.206	0.152	1	0
ENSMUSG00000022992	Kansl2	0.0415805	0.00138017	-0.0869842	0.0023054	0.152	0.207	1	0
ENSMUSG00000063849	Ppcdc	0.0416747	0.00932926	-0.06081	0.00250957	0.0615	0.102	1	0
ENSMUSG00000046516	Cox17	0.0417801	0.0447074	0.0688141	0.0190241	0.117	0.071	1	0
ENSMUSG00000051650	B3gnt2	0.0418884	0.0501525	-0.0834814	0.0194318	0.0945	0.147	1	0
ENSMUSG00000068747	Sort1	0.0419274	0.00918435	-0.0665214	0.00370287	0.315	0.391	1	0
ENSMUSG00000084883	Ccdc85c	0.0420558	0.0272989	0.0715029	0.0114753	0.1495	0.1	1	0
ENSMUSG00000034402	Kcnh5	0.0420941	0.0390262	-0.137318	0.0342428	0.269	0.331	1	0
ENSMUSG00000074749	Kiz	0.0420951	0.00795259	-0.0560516	0.00244932	0.0825	0.129	1	0	SFARI					3	0
ENSMUSG00000031601	Cnot7	0.0421521	0.0156927	-0.079345	0.00795434	0.2755	0.346	1	0
ENSMUSG00000025198	Erlin1	0.0421753	0.0332432	-0.089267	0.0180206	0.27	0.344	1	0
ENSMUSG00000035024	Ncapd3	0.0422454	0.0555505	-0.107611	0.0377461	0.182	0.249	1	0
ENSMUSG00000033352	Map2k4	0.0422916	0.0318012	-0.0720126	0.0243316	0.3875	0.478	1	0
ENSMUSG00000029722	Agfg2	0.0424473	0.0110101	-0.064277	0.00464757	0.126	0.181	1	0
ENSMUSG00000055013	Agap1	0.0424927	0.0121346	-0.096803	0.0123095	0.4905	0.575	1	0	SFARI					2	0
ENSMUSG00000026141	Col19a1	0.0425552	0.037882	-0.110611	0.0244756	0.165	0.223	1	0
ENSMUSG00000019831	Wasf1	0.0425645	0.0204872	-0.0561152	0.0180987	0.605	0.73	1	0	SFARI						1
ENSMUSG00000052446	Zfp961	0.0426101	0.0429952	-0.0657059	0.0150023	0.0645	0.108	1	0
ENSMUSG00000070738	Dgkd	0.0426724	0.0215186	-0.0573343	0.0111736	0.159	0.22	1	0
ENSMUSG00000038593	Tctn1	0.0427054	0.0161486	0.0862965	0.0043877	0.19	0.136	1	0
ENSMUSG00000033075	Senp1	0.0428115	0.00800831	-0.0576477	0	0.0855	0.131	1	0	SFARI					3	0
ENSMUSG00000005580	Adcy9	0.0428142	0.0437005	-0.0966068	0.0415894	0.583	0.672	1	0
ENSMUSG00000039126	Prune2	0.0428358	0.0498558	-0.0815592	0.0197612	0.0825	0.131	1	0	SFARI					2	0
ENSMUSG00000056596	Trnp1	0.0428453	0.0458387	-0.0800964	0.00931641	0.1335	0.192	1	0
ENSMUSG00000026843	Fubp3	0.0428824	0.00149428	-0.0752623	0.00222981	0.171	0.231	1	0	TADA	0.0808757
ENSMUSG00000113960	4933412O06Rik	0.0429463	0.0275481	-0.0611282	0.00980911	0.08	0.126	1	0
ENSMUSG00000026116	Tmem131	0.0431498	0.0179547	-0.106748	0.0111899	0.3345	0.407	1	0
ENSMUSG00000034731	Dgkh	0.043231	0.0353716	-0.121926	0.0113856	0.6995	0.782	1	0
ENSMUSG00000002846	Timmdc1	0.0433701	0.0526725	-0.0890504	0.0259471	0.122	0.178	1	0
ENSMUSG00000068039	Tcp1	0.0434079	0.0284438	0.0845249	0.0183447	0.2625	0.199	1	0
ENSMUSG00000022707	Gbe1	0.0434239	0.0234192	-0.095818	0.0206559	0.13	0.184	1	0	SFARI					2	0
ENSMUSG00000040536	Necab1	0.0434586	0.0438328	-0.141086	0.0407847	0.5365	0.619	1	0
ENSMUSG00000034040	Galnt17	0.0434676	0.0279021	-0.172819	0.0259471	0.572	0.643	1	0
ENSMUSG00000034892	Rps29	0.0434978	0.0244695	0.13801	0.0155157	0.278	0.223	1	0
ENSMUSG00000071415	Rpl23	0.0435613	0.0152437	0.0864402	0.00912883	0.1495	0.102	1	0
ENSMUSG00000031667	Aktip	0.0437217	0.0390434	-0.0579293	0.0167044	0.1085	0.163	1	0
ENSMUSG00000002728	Naa20	0.0438161	0.0525427	-0.0672477	0.0277606	0.135	0.197	1	0
ENSMUSG00000022897	Dyrk1a	0.0438855	0.0118702	-0.0952123	0	0.348	0.409	1	0	SFARI;EAGLE;TADA	1.78e-13	Definitive	20.2	Concordant	1	1
ENSMUSG00000029452	Tmem116	0.0439305	0.0210325	-0.0695453	0.00503774	0.0605	0.1	1	0
ENSMUSG00000021036	Sptlc2	0.0439749	0.0140317	-0.0695809	0	0.1105	0.16	1	0
ENSMUSG00000037852	Cpe	0.0440387	0.0317281	0.160905	0.0205819	0.551	0.52	1	0
ENSMUSG00000026384	Ptpn4	0.0441405	0.0100163	-0.10818	0.00622988	0.47	0.538	1	0	SFARI						1
ENSMUSG00000012535	Tnpo3	0.0441959	0.0359665	-0.0958437	0.0254518	0.2215	0.286	1	0	SFARI;TADA	0.0513369				3	0
ENSMUSG00000010392	Gosr1	0.0443588	0	-0.072064	0	0.073	0.115	1	0
ENSMUSG00000042079	Hnrnpf	0.0445194	0.0555721	-0.0616632	0.0264362	0.1035	0.16	1	0	SFARI					2	0
ENSMUSG00000025280	Polr3a	0.0445776	0.0615582	-0.0647154	0.0647925	0.1285	0.197	1	0	SFARI					3	1
ENSMUSG00000024622	Hmgxb3	0.0446221	0.0463321	-0.0650262	0.0216803	0.102	0.155	1	0
ENSMUSG00000019804	Snx3	0.0446527	0.0291501	-0.091031	0.0152425	0.1915	0.255	1	0
ENSMUSG00000030432	Rpl28	0.0447637	0.0576777	0.151485	0.0332458	0.203	0.147	1	0
ENSMUSG00000020102	Slc16a7	0.0447667	0.016378	-0.10874	0.00798548	0.2675	0.336	1	0
ENSMUSG00000036391	Sec24a	0.0448571	0.0143988	-0.0442407	0.012699	0.203	0.27	1	0
ENSMUSG00000102869	Norad	0.0448799	0.0283943	0.11768	0.00207556	0.2325	0.178	1	0
ENSMUSG00000063663	Brwd3	0.0449644	0.00225019	-0.0980956	0.0116367	0.2785	0.349	1	0	SFARI						1
ENSMUSG00000068663	Clec16a	0.0450664	0.0285664	-0.0841285	0.0145292	0.248	0.315	1	0
ENSMUSG00000038205	Prkab2	0.045184	0.0592608	-0.0952605	0.0313914	0.167	0.234	1	0
ENSMUSG00000059742	Kcnh7	0.0452223	0.0452978	-0.118131	0.0347576	0.643	0.69	1	0
ENSMUSG00000062997	Rpl35	0.045311	0.0253435	0.0601323	0.0119037	0.117	0.073	1	0
ENSMUSG00000061751	Kalrn	0.0454091	0.00387986	-0.100103	0.010469	0.9385	0.945	1	0
ENSMUSG00000060636	Rpl35a	0.0454988	0.0255956	0.0786965	0.00221049	0.1835	0.131	1	0
ENSMUSG00000073102	Drc1	0.0456484	0.00888184	-0.050566	0.00250957	0.0645	0.105	1	0
ENSMUSG00000103428	Gm20754	0.0456746	0.0210391	-0.0193683	0.0159287	0.4045	0.499	1	0
ENSMUSG00000054885	4930578G10Rik	0.045694	0.0186862	-0.0776924	0.00868209	0.188	0.249	1	0
ENSMUSG00000052155	Acvr2a	0.0457159	0.0160192	-0.138416	0.0136934	0.293	0.354	1	0
ENSMUSG00000021775	Nr1d2	0.0457349	0.0410898	-0.059469	0.0117034	0.29	0.37	1	0
ENSMUSG00000020137	Thap2	0.0459433	0.00221949	-0.0532262	0.00741923	0.068	0.11	1	0
ENSMUSG00000062929	Cfl2	0.0459494	0.0280096	-0.0755299	0.0163226	0.1325	0.186	1	0
ENSMUSG00000090086	AI480526	0.0461885	0.0351163	-0.0838988	0.0155411	0.1775	0.239	1	0
ENSMUSG00000021428	Riok1	0.0462203	0.0603777	-0.0732928	0.0289421	0.097	0.152	1	0
ENSMUSG00000047466	8030462N17Rik	0.0462782	0.0217646	-0.0688493	0.0179693	0.434	0.522	1	0
ENSMUSG00000001052	Sec24b	0.0462843	0.00596808	-0.0682876	0.00605426	0.26	0.331	1	0
ENSMUSG00000090053	Pakap	0.04629	0.0534374	-0.057044	0.0211314	0.1125	0.171	1	0
ENSMUSG00000032839	Trpc1	0.0464263	0.0215659	-0.0852208	0.0145997	0.3435	0.42	1	0
ENSMUSG00000024069	Slc30a6	0.0464826	0.019964	-0.0499621	0.00247908	0.0685	0.11	1	0
ENSMUSG00000026490	Cdc42bpa	0.0465548	0.018859	-0.116037	0.0168932	0.7625	0.864	1	0
ENSMUSG00000060882	Kcnd2	0.0466901	0.0404085	-0.0656583	0.0157728	1	1	1	0	SFARI					2	0
ENSMUSG00000038388	Pals2	0.046786	0.0596017	-0.116793	0.0603958	0.592	0.672	1	0
ENSMUSG00000029191	Rfc1	0.0467948	0.0078327	-0.0565835	0	0.101	0.15	1	0
ENSMUSG00000038212	Mfsd14b	0.0468464	0.0171372	-0.0644319	0	0.084	0.129	1	0
ENSMUSG00000021991	Cacna2d3	0.0468559	0.012054	-0.0640584	0.00536446	0.9985	0.992	1	0	SFARI;EAGLE		Limited	3.75	Discordant	1	0
ENSMUSG00000040446	Rprd1a	0.0468568	0.0259686	-0.0857279	0.0167698	0.349	0.42	1	0
ENSMUSG00000058886	Deaf1	0.0468657	0.0196509	-0.0586974	0.00726081	0.0945	0.142	1	0	SFARI;EAGLE;TADA	0.00033161	Definitive - Autosomal dominant	30.9	Concordant	1	1
ENSMUSG00000019794	Katna1	0.0470383	0.0434557	-0.0696695	0.0123058	0.0825	0.129	1	0
ENSMUSG00000015522	Arnt	0.0470538	0.00832732	-0.0787947	0.00424175	0.219	0.283	1	0
ENSMUSG00000021182	Ccdc88c	0.0472257	0.00317198	-0.0830376	0	0.336	0.407	1	0	SFARI					2	0
ENSMUSG00000027167	Elp4	0.047269	0.0343255	-0.0896062	0.00396171	0.29	0.36	1	0	SFARI					2	0
ENSMUSG00000038346	Zfp384	0.047382	0.0147591	-0.0596855	0.0123058	0.0775	0.121	1	0
ENSMUSG00000046844	Vat1l	0.0475117	0.0605085	-0.151042	0.0588352	0.3335	0.399	1	0
ENSMUSG00000005583	Mef2c	0.0475144	0.0376707	-0.119857	0.0299183	0.479	0.549	1	0	SFARI;EAGLE		Moderate	9.85	Discordant	1	1
ENSMUSG00000035575	Utp6	0.0475378	0	-0.0453605	0	0.06	0.1	1	0
ENSMUSG00000024535	Snx24	0.0475695	0.0578408	-0.0789022	0.0219393	0.0865	0.136	1	0
ENSMUSG00000052504	Epha3	0.0477673	0.0163778	-0.0683049	0.00690063	0.126	0.178	1	0
ENSMUSG00000027881	Prpf38b	0.0477746	0.00264588	0.0898204	0.00410519	0.257	0.199	1	0
ENSMUSG00000000276	Dgke	0.0478395	0.0507198	-0.0630252	0.0256506	0.1245	0.181	1	0
ENSMUSG00000043962	Thrap3	0.0478743	0.0518435	-0.0728517	0.0234525	0.291	0.367	1	0
ENSMUSG00000027552	E2f5	0.0479571	0.0112033	-0.0538587	0.00250341	0.067	0.108	1	0
ENSMUSG00000040913	Fbxw4	0.0481088	0.00667463	-0.0925646	0.0062394	0.248	0.312	1	0
ENSMUSG00000039205	Ciz1	0.0481822	0.0322977	-0.0574121	0.00752874	0.064	0.105	1	0
ENSMUSG00000085439	Rapgef4os1	0.0483624	0	-0.0760359	0	0.108	0.155	1	0
ENSMUSG00000046679	C87436	0.0484982	0.0117902	-0.0561922	0.00736566	0.0775	0.121	1	0
ENSMUSG00000021910	Nisch	0.0485935	0.0108714	0.14996	0.0173475	0.58	0.53	1	0
ENSMUSG00000002064	Sdf2	0.0486582	0.0111692	0.0587367	0.00957884	0.109	0.068	1	0
ENSMUSG00000029538	Srsf9	0.0486926	0.0214936	-0.0725478	0.00457462	0.1535	0.21	1	0
ENSMUSG00000071866	Ppia	0.048697	0.0100083	0.180732	0	0.3635	0.312	1	0
ENSMUSG00000056763	Cspp1	0.048708	0.0468874	-0.0791776	0.0229943	0.466	0.567	1	0
ENSMUSG00000026584	Scyl3	0.0487568	0.0179262	-0.0828451	0.00482336	0.1105	0.157	1	0
ENSMUSG00000030231	Plekha5	0.0488716	0.0254265	-0.0893897	0.00894865	0.9295	0.982	1	0
ENSMUSG00000074733	Zfp950	0.0491011	0.0195978	-0.0801146	0.0143572	0.4685	0.551	1	0
ENSMUSG00000015214	Mtmr1	0.0491408	0.00788589	-0.0849783	0.00426837	0.2125	0.276	1	0
ENSMUSG00000071252	2210408I21Rik	0.049147	0.0332366	-0.0880464	0.0222336	0.3715	0.451	1	0
ENSMUSG00000037788	Vopp1	0.0491879	0.0180172	-0.0542217	0.00919051	0.1365	0.192	1	0
ENSMUSG00000020794	Ube2g1	0.0493035	0.0352859	-0.0875615	0.0122383	0.375	0.451	1	0
ENSMUSG00000018076	Med13l	0.0494	0.0310274	-0.0881487	0.0211351	0.432	0.517	1	0	SFARI;EAGLE;TADA	6.23e-06	Definitive	35	Concordant	1	1
ENSMUSG00000063550	Nup98	0.0495244	0.0641414	-0.0736372	0.0390362	0.3545	0.449	1	0
ENSMUSG00000040840	4930579G18Rik	0.0495252	0.0310147	-0.0564588	0.00740129	0.075	0.118	1	0
ENSMUSG00000024188	Luc7l	0.0495539	0.016086	-0.0433436	0.00643623	0.1915	0.257	1	0
ENSMUSG00000003452	Bicd1	0.0495646	0.0134349	-0.110403	0.00300483	0.4885	0.57	1	0
ENSMUSG00000028293	Slc35a1	0.0496988	0.0206588	-0.051868	0.00722652	0.0945	0.142	1	0
ENSMUSG00000022858	Tra2b	0.0498077	0.0196903	-0.0339263	0.0197395	0.3345	0.425	1	0
ENSMUSG00000015971	Actr8	0.0499952	0.00126823	-0.0622611	0.0024318	0.087	0.131	1	0
ENSMUSG00000092083	Kcnb2	0.0500472	0.00111704	-0.0914653	0.0121366	0.482	0.556	1	0
ENSMUSG00000033416	Gucd1	0.0500714	0.0626084	-0.0800869	0.0242325	0.093	0.144	1	0
ENSMUSG00000042472	Zfp410	0.0502094	0.0315403	-0.0680811	0.0098565	0.08	0.123	1	0
ENSMUSG00000024539	Ptpn2	0.0502688	0.0205707	-0.0612677	0.0022695	0.151	0.207	1	0
ENSMUSG00000030313	Dennd5b	0.0502918	0.0271331	-0.100061	0.0107196	0.344	0.425	1	0
ENSMUSG00000032373	Car12	0.0504984	0.0576944	-0.10844	0.0492388	0.316	0.396	1	0
ENSMUSG00000020076	Ddx50	0.0505432	0.0500311	-0.0512677	0.0324967	0.3675	0.472	1	0
ENSMUSG00000071862	Lrrtm2	0.0506919	0.0391478	-0.0524932	0.0121882	0.089	0.136	1	0
ENSMUSG00000002010	Idh3g	0.0507075	0.00415314	0.0812702	0.0065745	0.1875	0.136	1	0
ENSMUSG00000039629	Strip2	0.0507323	0.00853816	-0.0880569	0.00203824	0.2465	0.31	1	0
ENSMUSG00000056268	Dennd1b	0.0507693	0.0631169	-0.094503	0.0385697	0.3425	0.415	1	0
ENSMUSG00000024186	Rgs11	0.0507925	0.0277737	-0.0688482	0.0142395	0.252	0.32	1	0
ENSMUSG00000028106	Rprd2	0.0508088	0.0558147	-0.0869486	0.0175386	0.2885	0.365	1	0
ENSMUSG00000021178	Psmc1	0.0508214	0.0158927	-0.0856646	0	0.1105	0.157	1	0
ENSMUSG00000068457	Uty	0.0508964	0.0251842	-0.0707288	0.00702095	0.513	0.601	1	0
ENSMUSG00000027273	Snap25	0.0509476	0.00938665	-0.0513184	0.00798548	0.73	0.819	1	0	SFARI					2	0
ENSMUSG00000024454	Hdac3	0.0510727	0.0321848	-0.0561288	0.0190241	0.114	0.165	1	0
ENSMUSG00000018651	Tada2a	0.0512203	0.0481866	-0.0757077	0.022874	0.155	0.213	1	0
ENSMUSG00000029780	Nt5c3	0.051299	0.0118207	-0.0677488	0.00490453	0.0855	0.129	1	0
ENSMUSG00000035086	Becn1	0.0513219	0.0631144	-0.0593952	0.0237806	0.1115	0.168	1	0
ENSMUSG00000038482	Tfdp1	0.0514458	0.00165803	-0.0484863	0.00929518	0.123	0.176	1	0
ENSMUSG00000084950	Gm5577	0.0515964	0.0349025	-0.0688064	0.00948974	0.1155	0.165	1	0
ENSMUSG00000000374	Trappc10	0.0516494	0.0102793	-0.0577192	0.00462649	0.135	0.189	1	0
ENSMUSG00000021193	Pitrm1	0.0516726	0.0344054	-0.0470299	0.00751026	0.064	0.105	1	0
ENSMUSG00000021033	Gstz1	0.0517482	0.0146175	-0.0544645	0.00980911	0.08	0.123	1	0
ENSMUSG00000004096	Cwc15	0.0519298	0.0378395	-0.0408404	0.0243482	0.08	0.126	1	0
ENSMUSG00000025413	Ttc4	0.0519573	0.0497854	-0.0557834	0.0206559	0.148	0.207	1	0
ENSMUSG00000087380	2210408F21Rik	0.0519773	0.0635872	-0.0788211	0.0307824	0.1665	0.231	1	0
ENSMUSG00000028433	Ubap2	0.0520126	0.0111367	-0.0550281	0.00440666	0.172	0.231	1	0
ENSMUSG00000033419	Snap91	0.0521351	0.0703838	-0.121314	0.0515131	0.278	0.354	1	0
ENSMUSG00000028657	Ppt1	0.0522222	0.0155246	-0.0800145	0.00415536	0.2255	0.294	1	0
ENSMUSG00000041353	Tmem29	0.052298	0.0503433	-0.0589392	0.0252466	0.139	0.197	1	0
ENSMUSG00000043535	Setx	0.0523545	0.0534188	-0.120625	0.0242421	0.248	0.312	1	0
ENSMUSG00000009090	Ap1b1	0.052369	0.0330247	-0.0917587	0.0133937	0.173	0.231	1	0
ENSMUSG00000021044	Adck1	0.0523848	0.0539936	-0.0693677	0.0171456	0.089	0.136	1	0
ENSMUSG00000038860	Garnl3	0.0524699	0.00179659	-0.0594072	0.0128591	0.194	0.255	1	0
ENSMUSG00000035047	Kri1	0.0527092	0.0322881	-0.0405631	0.00969261	0.085	0.131	1	0
ENSMUSG00000070695	Cntnap5a	0.0527347	0.0457281	-0.182612	0.0520644	0.602	0.646	1	0
ENSMUSG00000027281	Slx4ip	0.0527355	0.0145085	-0.106706	0.00643623	0.2205	0.278	1	0
ENSMUSG00000043323	Fbrsl1	0.0528425	0.0726485	-0.0699979	0.0385004	0.101	0.16	1	0	SFARI						1
ENSMUSG00000031608	Galnt7	0.052885	0	-0.0832831	0	0.231	0.294	1	0
ENSMUSG00000024143	Rhoq	0.0529139	0.00152983	-0.06348	0.00235326	0.121	0.171	1	0
ENSMUSG00000022680	Pdxdc1	0.0529198	0.0156828	-0.045876	0.0204262	0.147	0.202	1	0
ENSMUSG00000014959	Gorasp2	0.0529267	0.0360446	-0.0653799	0.0161381	0.139	0.194	1	0
ENSMUSG00000045071	E130308A19Rik	0.0529305	0.00218641	-0.0873749	0.00694763	0.131	0.181	1	0
ENSMUSG00000040441	Slc26a10	0.0530743	0.00124835	-0.0793735	0.00245521	0.084	0.126	1	0
ENSMUSG00000026571	Dcaf6	0.0530802	0.0664983	-0.103569	0.0386125	0.507	0.598	1	0
ENSMUSG00000027722	Spata5	0.0531066	0.0280977	-0.0671256	0.00809639	0.2465	0.315	1	0
ENSMUSG00000109372	Gm19410	0.0532242	0.0173086	-0.0802075	0.00191216	0.286	0.354	1	0
ENSMUSG00000035953	Pip4p1	0.0532672	0.0437925	-0.0554669	0.0141035	0.122	0.176	1	0
ENSMUSG00000027447	Cst3	0.0533017	0.0196307	0.200037	0.0443995	0.2885	0.239	1	0
ENSMUSG00000028032	Papss1	0.0535022	0.00770187	-0.0411289	0.00491634	0.0775	0.121	1	0
ENSMUSG00000022577	Ly6h	0.0535085	0.0330712	0.12917	0.0255048	0.328	0.27	1	0
ENSMUSG00000022325	Pop1	0.0536264	0.0238995	-0.0599521	0.00741923	0.076	0.118	1	0
ENSMUSG00000057841	Rpl32	0.0537015	0.0100499	0.071046	0.00466884	0.1325	0.089	1	0
ENSMUSG00000021733	Slc4a7	0.0537042	0.0321003	-0.080253	0	0.1875	0.249	1	0
ENSMUSG00000024826	Dpf2	0.0537693	0.000954473	0.0738247	0.00462649	0.144	0.1	1	0
ENSMUSG00000015748	Prpf3	0.0537819	0.0292816	-0.0794852	0.0171097	0.209	0.273	1	0
ENSMUSG00000026851	BC005624	0.0537891	0.00127917	-0.049843	0.00247307	0.076	0.118	1	0
ENSMUSG00000079477	Rab7	0.0539451	0.0455695	0.121465	0.010171	0.24	0.186	1	0
ENSMUSG00000020601	Trib2	0.0539709	0.0477347	-0.0832601	0.0145391	0.0935	0.139	1	0
ENSMUSG00000031511	Arhgef7	0.0540235	0.0739329	-0.0933797	0.0394942	0.193	0.265	1	0
ENSMUSG00000024109	Nrxn1	0.0540277	0.00672711	-0.104838	0.00400167	0.9465	0.966	1	0	SFARI;EAGLE		Definitive	143.75	Concordant	1	0
ENSMUSG00000021500	Ddx46	0.0541885	0.0389898	-0.0763435	0.01521	0.2005	0.26	1	0
ENSMUSG00000024878	Cbwd1	0.0541931	0.0319565	-0.0637484	0.00249118	0.072	0.113	1	0
ENSMUSG00000056124	B4galt6	0.054247	0.0166792	-0.0629121	0.00233175	0.1315	0.184	1	0
ENSMUSG00000001120	Pcbp3	0.0542502	0.0287041	-0.0647975	0.00851896	0.2205	0.286	1	0
ENSMUSG00000098912	1500004A13Rik	0.0543504	0.00645584	-0.0677201	0	0.312	0.388	1	0
ENSMUSG00000107872	Gm44511	0.0543662	0.0311128	0.140574	0.022299	0.5645	0.52	1	0
ENSMUSG00000039191	Rbpj	0.0543727	0.0268949	-0.0442668	0.0117664	0.117	0.168	1	0
ENSMUSG00000113216	Gm40841	0.0544481	0.0482789	-0.0686507	0.0277876	0.257	0.331	1	0
ENSMUSG00000015968	Cacna1d	0.0544777	0.0336778	-0.0650042	0.016779	0.807	0.895	1	0	SFARI					2	0
ENSMUSG00000008429	Herpud2	0.0545134	0.00171093	-0.0741698	0.00467955	0.126	0.176	1	0
ENSMUSG00000024974	Smc3	0.0545991	0.0658376	-0.083515	0.0297705	0.1575	0.218	1	0	SFARI					2	1
ENSMUSG00000016319	Slc25a5	0.0548023	0.0447999	0.116575	0.0220688	0.256	0.199	1	0
ENSMUSG00000056427	Slit3	0.0550053	0.0720016	-0.12035	0.0457484	0.9105	0.955	1	0
ENSMUSG00000040390	Map3k10	0.0550372	0.0304487	-0.0662062	0.00957884	0.1115	0.16	1	0
ENSMUSG00000029614	Rpl6	0.0551077	0.0266942	0.0712233	0.010031	0.2965	0.234	1	0
ENSMUSG00000021615	Xrcc4	0.0551722	0.0363939	-0.0919007	0.00688124	0.3775	0.454	1	0
ENSMUSG00000118664	Tusc3	0.0553323	0.0490289	0.136629	0.0138797	0.773	0.753	1	0
ENSMUSG00000039621	Prex1	0.0553369	0.0363927	-0.0554477	0.00940227	0.1235	0.176	1	0	SFARI					2	0
ENSMUSG00000056458	Mok	0.05535	0.060615	-0.0678092	0.0250773	0.1395	0.197	1	0
ENSMUSG00000019189	Rnf145	0.0553559	0.0413157	-0.0520737	0.0149866	0.2035	0.27	1	0
ENSMUSG00000009535	Rnmt	0.055484	0.02089	-0.0605732	0.00709254	0.118	0.168	1	0
ENSMUSG00000020333	Acsl6	0.055614	0.0480071	0.102187	0.0164211	0.248	0.192	1	0
ENSMUSG00000027312	Atrn	0.0556195	0.0468914	-0.0837061	0.0221377	0.3345	0.417	1	0
ENSMUSG00000026707	Nsun6	0.0556199	0.0205706	-0.060877	0.00676338	0.1545	0.21	1	0
ENSMUSG00000055737	Ghr	0.0556311	0.0552856	-0.11385	0.0186049	0.232	0.297	1	0
ENSMUSG00000021224	Numb	0.0556667	0.00662991	-0.0665694	0.00688124	0.365	0.444	1	0
ENSMUSG00000032047	Acat1	0.0556793	0.0266485	-0.0630607	0.0148309	0.2165	0.278	1	0
ENSMUSG00000056856	Jakmip3	0.0560976	0.0375973	-0.0651842	0.0163881	0.257	0.325	1	0
ENSMUSG00000034265	Zdhhc14	0.0561821	0.0131677	-0.115579	0.00687544	0.777	0.827	1	0
ENSMUSG00000055371	Stam2	0.0562514	0.0105454	-0.0794425	0.00679341	0.1695	0.223	1	0
ENSMUSG00000074113	Gm10629	0.056315	0.0133287	-0.0472494	0.00251576	0.0615	0.1	1	0
ENSMUSG00000038690	Atp5j2	0.0563392	0.0507296	0.0995936	0.0307824	0.176	0.126	1	0
ENSMUSG00000045671	Spred2	0.0563431	0.0323618	-0.0742055	0.0233808	0.4465	0.533	1	0
ENSMUSG00000004113	Cacna1b	0.0563594	0.0708728	-0.0827261	0.0473102	0.4675	0.562	1	0	SFARI					2	0
ENSMUSG00000101693	Gm19461	0.0564479	0.0345215	0.0772688	0.0113224	0.16	0.113	1	0
ENSMUSG00000054752	Fsd1l	0.0566147	0.0166331	-0.0586277	0	0.118	0.168	1	0
ENSMUSG00000022995	Enah	0.0566224	0.0129722	-0.0843312	0.00396171	0.243	0.307	1	0
ENSMUSG00000036890	Gtdc1	0.0566314	0.0543366	-0.0816482	0.0207238	0.286	0.36	1	0
ENSMUSG00000029287	Tgfbr3	0.0568968	0.022302	-0.0970279	0.0044354	0.182	0.236	1	0
ENSMUSG00000040111	Gramd1b	0.0570052	0.0613282	-0.0998266	0.0285594	0.437	0.52	1	0
ENSMUSG00000028188	Spata1	0.0570848	0.00998157	0.0745182	0.00466884	0.1195	0.079	1	0
ENSMUSG00000037058	Paip2	0.0572756	0.029244	-0.0864482	0.0323311	0.352	0.425	1	0
ENSMUSG00000002748	Baz1b	0.0572976	0.00230018	-0.0693098	0.0040163	0.269	0.339	1	0
ENSMUSG00000062519	Zfp398	0.0573372	0.0304877	-0.0718387	0.00946772	0.119	0.168	1	0
ENSMUSG00000079523	Tmsb10	0.0573374	0.0690203	0.104748	0.035798	0.16	0.11	1	0
ENSMUSG00000057649	Brd9	0.0573568	0.0528186	-0.068803	0.0119549	0.2715	0.341	1	0
ENSMUSG00000025220	Oga	0.057357	0.0263089	-0.080667	0.0115645	0.4145	0.501	1	0
ENSMUSG00000021596	Mctp1	0.0573835	0.0278479	-0.149047	0.022865	0.8715	0.908	1	0
ENSMUSG00000021000	Mia2	0.0574058	0.0486105	-0.0970007	0.028339	0.269	0.333	1	0
ENSMUSG00000066151	Fkbp15	0.0574643	0.0204796	-0.0691086	0.00476702	0.1105	0.157	1	0
ENSMUSG00000032186	Tmod2	0.057483	0.0269723	-0.0906802	0.00987558	0.286	0.349	1	0
ENSMUSG00000021969	Zdhhc20	0.0574837	0.0483562	-0.0553815	0.0239106	0.249	0.32	1	0
ENSMUSG00000020135	Apc2	0.0574941	0.0286184	0.0783673	0.0046903	0.119	0.079	1	0
ENSMUSG00000112153	Gm47591	0.0576109	0.00392898	-0.0661105	0.00195242	0.2875	0.362	1	0
ENSMUSG00000037416	Dmxl1	0.0576408	0.061993	-0.129533	0.0288491	0.563	0.661	1	0
ENSMUSG00000054976	Nyap2	0.0577234	0.0701358	-0.185947	0.0475151	0.5525	0.64	1	0
ENSMUSG00000032097	Ddx6	0.057915	0.0435146	-0.0806016	0.016161	0.268	0.333	1	0
ENSMUSG00000027303	Ptpra	0.0579902	0.0512422	-0.0912493	0.0241942	0.2455	0.312	1	0
ENSMUSG00000057335	Cep170	0.0582395	0.0401323	-0.0671694	0.0178455	0.269	0.336	1	0
ENSMUSG00000096929	A330023F24Rik	0.0582721	0.0786595	0.168484	0.0540107	0.7125	0.701	1	0
ENSMUSG00000016477	E2f3	0.0583344	0.0178563	-0.0500804	0.00450393	0.16	0.218	1	0
ENSMUSG00000042675	Ypel3	0.0583651	0.0152315	0.0812219	0.00683895	0.1525	0.108	1	0
ENSMUSG00000020376	Rnf130	0.0584922	0.0128299	-0.0495532	0.00890957	0.164	0.223	1	0
ENSMUSG00000021537	Cetn3	0.0585115	0.0321402	-0.0418728	0.00667487	0.1705	0.231	1	0
ENSMUSG00000014074	Rnf168	0.0586088	0.0516367	-0.0455099	0.0150762	0.0605	0.1	1	0
ENSMUSG00000027291	Vps39	0.0586145	0.0364035	-0.0570144	0.0145046	0.096	0.142	1	0
ENSMUSG00000020380	Rad50	0.0587033	0.0575769	-0.0605703	0.0174814	0.0665	0.108	1	0
ENSMUSG00000036572	Upf3b	0.058744	0.00725529	-0.0569466	0.00222011	0.1615	0.218	1	0	SFARI					1	1
ENSMUSG00000027164	Traf6	0.058762	0.0472921	-0.058898	0.00500069	0.0655	0.105	1	0
ENSMUSG00000031342	Gpm6b	0.0587779	0.00708991	-0.100001	0.00164539	0.808	0.864	1	0
ENSMUSG00000031012	Cask	0.0588128	0.0219125	-0.0773946	0.00661357	0.4175	0.491	1	0	SFARI					1	0
ENSMUSG00000025337	Sbds	0.0588404	0.0355015	-0.0578002	0.00980911	0.085	0.129	1	0
ENSMUSG00000049493	Pls1	0.0590709	0.0317356	0.0575501	0.00227964	0.147	0.1	1	0
ENSMUSG00000028830	AU040320	0.0591106	0.0433609	-0.062222	0.0259287	0.26	0.328	1	0
ENSMUSG00000031536	Polb	0.0592141	0.061428	-0.0915249	0.0185946	0.4065	0.493	1	0
ENSMUSG00000035139	Secisbp2	0.0592272	0.0379964	-0.0549507	0.00931641	0.126	0.178	1	0
ENSMUSG00000040820	Hlcs	0.059272	0.06094	-0.0663555	0.0191881	0.201	0.268	1	0
ENSMUSG00000043183	Simc1	0.0594154	0.046802	-0.0682633	0.0148207	0.0785	0.121	1	0
ENSMUSG00000025245	Lztfl1	0.0594199	0.0561187	-0.0784418	0.0150497	0.2045	0.268	1	0
ENSMUSG00000021807	Rtraf	0.0594641	0.0499012	0.0751671	0.0188484	0.1145	0.073	1	0
ENSMUSG00000027132	Katnbl1	0.0594731	0.0355353	-0.0594045	0.0122467	0.088	0.131	1	0
ENSMUSG00000042772	Smg7	0.0595417	0.076941	-0.0892116	0.0420171	0.332	0.415	1	0
ENSMUSG00000040591	1110051M20Rik	0.0598169	0.03808	-0.0931713	0.018892	0.3165	0.383	1	0
ENSMUSG00000040433	Zbtb38	0.0599292	0.0469093	-0.0622426	0.019724	0.1825	0.244	1	0
ENSMUSG00000021277	Traf3	0.0599574	0.010521	-0.0683387	0.00631667	0.2115	0.273	1	0
ENSMUSG00000022838	Eaf2	0.0599581	0.0221175	-0.0339938	0.00694763	0.1205	0.173	1	0
ENSMUSG00000028550	Atg4c	0.0599965	0.00642365	-0.0667044	0.00877545	0.184	0.241	1	0
ENSMUSG00000042616	Oscp1	0.0600042	0	0.0586122	0	0.113	0.073	1	0
ENSMUSG00000021810	Ecd	0.0600772	0.0217474	-0.0731517	0.00482336	0.105	0.15	1	0
ENSMUSG00000024350	Dnajc18	0.0601161	0.0282153	-0.0508528	0.00457462	0.143	0.197	1	0
ENSMUSG00000026082	Rev1	0.0601252	0.00849305	-0.0521769	0.00288992	0.5065	0.575	1	0
ENSMUSG00000085586	Gm11613	0.0603447	0.0469183	-0.0547227	0.0098565	0.076	0.118	1	0
ENSMUSG00000026229	Psmd1	0.0604109	0.00816021	-0.0695078	0.00437829	0.1875	0.247	1	0
ENSMUSG00000011179	Odc1	0.0604283	0.0538835	0.0541576	0.0141035	0.1285	0.084	1	0
ENSMUSG00000004633	Chn2	0.0604613	0.0515713	-0.0749319	0.0236154	0.1085	0.157	1	0
ENSMUSG00000062078	Qk	0.0604756	0.0393993	0.13549	0.0155039	0.433	0.378	1	0
ENSMUSG00000022974	Paxbp1	0.0605112	0.0425677	-0.0766124	0.0139033	0.386	0.459	1	0
ENSMUSG00000020948	Klhl28	0.0605945	0.0541063	-0.0612724	0.00983275	0.08	0.123	1	0
ENSMUSG00000043940	Wdfy3	0.060647	0.0172912	-0.0790587	0.0118853	0.269	0.331	1	0	SFARI;EAGLE;TADA	0.0630417	Definitive	17.2	Concordant	1	0
ENSMUSG00000027194	Ttc17	0.0606625	0.0487837	-0.0774667	0.0155157	0.319	0.386	1	0
ENSMUSG00000020120	Plek	0.0607041	0.0139029	-0.0470213	0.00250341	0.0645	0.102	1	0
ENSMUSG00000026781	Acbd5	0.0607394	0.013016	-0.0696638	0.00877545	0.1875	0.244	1	0
ENSMUSG00000101970	Chaserr	0.0607558	0.0573937	-0.100082	0.0316348	0.2875	0.349	1	0
ENSMUSG00000010095	Slc3a2	0.060843	0.0561392	0.0749894	0.0188049	0.121	0.079	1	0
ENSMUSG00000063804	Lin28b	0.0609003	0.0461496	-0.048336	0	0.3465	0.425	1	0
ENSMUSG00000014554	Dguok	0.0610341	0.0232468	-0.0695078	0.00437829	0.193	0.252	1	0
ENSMUSG00000098243	Gm4258	0.0611459	0.0158937	-0.0961182	0	0.2045	0.262	1	0
ENSMUSG00000054477	Kcnn2	0.0614041	0.00564555	-0.112279	0.00569382	0.315	0.375	1	0
ENSMUSG00000029474	Rnf34	0.0614314	0.0233633	-0.0578898	0.0071589	0.1105	0.157	1	0
ENSMUSG00000027963	Extl2	0.0614534	0.00233352	0.0651405	0.00450393	0.171	0.123	1	0
ENSMUSG00000039706	Ldb2	0.0615011	0.057391	-0.0866253	0.026637	0.332	0.412	1	0
ENSMUSG00000071669	Snx29	0.0615322	0.0432784	-0.0686976	0.0110525	0.1775	0.236	1	0
ENSMUSG00000053110	Yap1	0.0615382	0.0638199	-0.0443266	0.0146785	0.079	0.123	1	0
ENSMUSG00000027016	Zfp385b	0.0616181	0.0416074	-0.117808	0.0280289	0.941	0.95	1	0	SFARI					2	0
ENSMUSG00000060935	Tmem263	0.0616488	0.0110992	-0.0608699	0.00225445	0.164	0.218	1	0
ENSMUSG00000025237	Parp6	0.0619699	0.0746882	-0.0654297	0.0439513	0.207	0.278	1	0
ENSMUSG00000051166	Eml5	0.0620204	0.00405274	-0.122729	0.0175243	0.7995	0.877	1	0
ENSMUSG00000102692	Dchs2	0.0620365	0.0579179	-0.066561	0.0277751	0.1955	0.257	1	0
ENSMUSG00000063430	Wscd2	0.0621302	0.0437045	-0.0696707	0.0193949	0.2825	0.349	1	0
ENSMUSG00000014767	Tbp	0.0622754	0.024988	-0.0569911	0.00249118	0.0735	0.113	1	0
ENSMUSG00000022890	Atp5j	0.062325	0.0663255	0.115371	0.0247819	0.232	0.178	1	0
ENSMUSG00000060510	Zfp266	0.0623694	0.0211042	-0.0505731	0.00220571	0.169	0.228	1	0
ENSMUSG00000025658	Cnksr2	0.0623747	0.00239159	-0.122635	0.00124839	0.962	0.982	1	0	SFARI					2	1
ENSMUSG00000040451	Sgms1	0.0623876	0.0440485	-0.0777444	0.0112932	0.324	0.394	1	0
ENSMUSG00000022855	Senp2	0.0624011	0.0553325	-0.0609828	0.0209482	0.2245	0.294	1	0
ENSMUSG00000022498	Txndc11	0.0624068	0.0631991	-0.0867772	0.0227858	0.2505	0.315	1	0
ENSMUSG00000052040	Klf13	0.0624677	0.0123214	-0.0339863	0.00231587	0.122	0.173	1	0
ENSMUSG00000000738	Spg7	0.0624903	0.0242153	-0.0372876	0.0116058	0.1315	0.184	1	0
ENSMUSG00000039335	Spata16	0.0625696	0.0112809	-0.0523456	0.0024318	0.0775	0.118	1	0
ENSMUSG00000034154	Ino80	0.0625973	0.032158	-0.112178	0.0107573	0.37	0.433	1	0
ENSMUSG00000026199	Ankzf1	0.0626112	0.0237958	0.0516991	0.00957884	0.1105	0.071	1	0
ENSMUSG00000059273	Zc3h4	0.062701	0.0691408	-0.0521578	0.0200034	0.068	0.11	1	0	SFARI					2	0
ENSMUSG00000036712	Cyld	0.0627123	0.0167083	-0.090631	0.00224207	0.6655	0.774	1	0
ENSMUSG00000045519	Zfp560	0.0628388	0.0849797	-0.0623466	0.0349226	0.068	0.115	1	0
ENSMUSG00000035441	Myo1d	0.0629158	0.0157438	-0.0595279	0.00736566	0.08	0.121	1	0
ENSMUSG00000032423	Syncrip	0.0629425	0.0405804	-0.0472595	0.00205881	0.226	0.294	1	0	SFARI;TADA	0.00098861				2	0
ENSMUSG00000029263	Pigg	0.063005	0.0387686	-0.0656713	0.00500069	0.067	0.105	1	0
ENSMUSG00000003380	Rabac1	0.0630262	0.0428051	0.1173	0.00777253	0.2835	0.228	1	0
ENSMUSG00000041720	Pi4ka	0.0632328	0.0370592	-0.0503445	0.00658582	0.572	0.685	1	0
ENSMUSG00000026926	Pmpca	0.0632647	0.0583232	-0.0653709	0.00995266	0.0725	0.113	1	0
ENSMUSG00000038160	Atg5	0.0634634	0.0279722	-0.0568635	0.00745538	0.0735	0.113	1	0
ENSMUSG00000051401	Kctd16	0.0636396	0.0011284	-0.10538	0.00116832	0.9675	0.976	1	0
ENSMUSG00000030525	Chrna7	0.0636447	0.0471613	-0.0919555	0.0197325	0.252	0.32	1	0	SFARI					2	0
ENSMUSG00000034936	Arl4d	0.0638505	0.0203772	0.0611115	0	0.1125	0.073	1	0
ENSMUSG00000014353	Tmem87b	0.0641498	0.00899208	-0.0535303	0.00233709	0.122	0.171	1	0
ENSMUSG00000025609	Mkln1	0.0642083	0.0262047	-0.0742546	0	0.3425	0.417	1	0
ENSMUSG00000026277	Stk25	0.0642322	0.0310083	-0.04732	0.00906797	0.1535	0.21	1	0
ENSMUSG00000035545	Leng8	0.0642433	0.0669926	-0.0681024	0.0197048	0.3465	0.423	1	0
ENSMUSG00000052337	Immt	0.0643225	0.00606962	-0.0606146	0.00673362	0.16	0.215	1	0
ENSMUSG00000036501	Fam13b	0.064349	0.0312822	-0.0598662	0.0060304	0.2555	0.323	1	0
ENSMUSG00000040389	Wdr47	0.0644592	0.0362417	-0.0828139	0.0172099	0.308	0.378	1	0
ENSMUSG00000031605	Klhl2	0.0645597	0.0165788	-0.131645	0.00259908	0.609	0.64	1	0
ENSMUSG00000024817	Uhrf2	0.0645886	0.0331672	-0.076532	0.0175386	0.285	0.36	1	0
ENSMUSG00000068250	Amn1	0.0647004	0.0624244	-0.0545583	0.0166654	0.102	0.15	1	0
ENSMUSG00000031059	Ndufb11	0.0647152	0.0567117	0.0622866	0.0163226	0.134	0.089	1	0
ENSMUSG00000022337	Emc2	0.064722	0.0482351	-0.0723542	0.0107046	0.205	0.268	1	0
ENSMUSG00000036006	Ripor2	0.0647241	0.0730588	-0.124502	0.0367106	0.479	0.559	1	0
ENSMUSG00000041852	Tcf20	0.0647723	0.0256121	-0.0926006	0.0107699	0.6365	0.714	1	0	SFARI;EAGLE;TADA	9.63e-05	Definitive	38	Concordant	1	1
ENSMUSG00000004661	Arid3b	0.0648216	0.0672012	-0.0483464	0.0201571	0.1545	0.215	1	0
ENSMUSG00000090386	Mir99ahg	0.0648337	0.0163393	0.163317	0.0170415	0.3965	0.341	1	0
ENSMUSG00000026648	Dclre1c	0.0648432	0.0128305	-0.0660127	0.00244932	0.0855	0.126	1	0
ENSMUSG00000044098	Rsbn1	0.0649698	0.0606832	-0.0538799	0.0155157	0.2875	0.357	1	0
ENSMUSG00000057367	Birc2	0.06512	0.0284766	-0.0700176	0.00676338	0.167	0.22	1	0
ENSMUSG00000032666	1700025G04Rik	0.065222	0.0551007	-0.043484	0.00960138	0.0905	0.136	1	0
ENSMUSG00000056999	Ide	0.0652992	0.0232823	-0.0683979	0.00792345	0.264	0.331	1	0
ENSMUSG00000033228	Scaf11	0.0653078	0.0633513	-0.0719203	0.0236702	0.121	0.171	1	0
ENSMUSG00000027347	Rasgrp1	0.0653745	0.0804541	-0.0647011	0.0423355	0.3965	0.496	1	0
ENSMUSG00000020770	Unk	0.065405	0.0488994	-0.0713541	0.00940227	0.1245	0.173	1	0
ENSMUSG00000019894	Slc6a15	0.0654401	0.0639938	-0.0725362	0.0116856	0.122	0.173	1	0
ENSMUSG00000026374	Tsn	0.0655572	0.0333227	-0.0666531	0.00482336	0.093	0.136	1	0
ENSMUSG00000032534	Cep63	0.0656521	0.0642821	-0.0568621	0.0117124	0.1245	0.176	1	0
ENSMUSG00000052616	Terb1	0.0659861	0.0294558	-0.0523449	0.00502533	0.063	0.1	1	0
ENSMUSG00000021520	Uqcrb	0.0660772	0.0200707	0.073313	0.00459523	0.139	0.097	1	0
ENSMUSG00000039715	Dync2i2	0.066106	0.0766994	-0.0678488	0.0245238	0.075	0.118	1	0
ENSMUSG00000020132	Rab21	0.0661508	0.00618131	-0.0473221	0.00971569	0.087	0.129	1	0
ENSMUSG00000030868	Dctn5	0.0661742	0.0229279	0.067516	0.00239189	0.105	0.068	1	0
ENSMUSG00000037646	Vps13b	0.0662615	0.0132239	-0.0834416	0.0121447	0.749	0.845	1	0	SFARI;EAGLE		Moderate	6.35	Discordant	1	1
ENSMUSG00000021700	Rab3c	0.0663422	0.0349952	-0.129478	0.00319293	0.4225	0.488	1	0
ENSMUSG00000038371	Sbf2	0.0663477	0.0611672	-0.0859173	0.0231597	0.6505	0.745	1	0
ENSMUSG00000033849	B3galt2	0.0664366	0.0535578	-0.063927	0.0124866	0.071	0.11	1	0
ENSMUSG00000027236	Eif3j1	0.0665371	0.0771772	-0.0585384	0.0264986	0.1045	0.155	1	0
ENSMUSG00000021725	Parp8	0.0666896	0.039494	-0.0490437	0.0132201	0.168	0.226	1	0
ENSMUSG00000021713	Ppwd1	0.0667386	0.0544834	-0.0685727	0.0154402	0.168	0.226	1	0
ENSMUSG00000029486	Mrpl1	0.0667649	0.0690555	-0.0683094	0.0282084	0.13	0.181	1	0
ENSMUSG00000030101	Sumf1	0.0667867	0.0278099	-0.0516444	0.0119877	0.097	0.142	1	0
ENSMUSG00000041718	Alg13	0.0668754	0.0144707	-0.0484404	0	0.0695	0.108	1	0
ENSMUSG00000035051	Dhx57	0.0669845	0.00261964	-0.0834883	0.00434103	0.199	0.255	1	0
ENSMUSG00000034480	Diaph2	0.0670236	0.0107546	-0.0871722	0.0116746	0.878	0.919	1	0
ENSMUSG00000040270	Bach2	0.0671105	0.0358416	-0.0841439	0.0276264	0.23	0.291	1	0
ENSMUSG00000042410	Agps	0.0671902	0.00763723	-0.0260513	0.00218679	0.1745	0.236	1	0
ENSMUSG00000027166	Dnajc24	0.0672444	0.0587834	-0.0721655	0.00951186	0.1155	0.163	1	0
ENSMUSG00000028437	Ubap1	0.067259	0.057882	-0.0475458	0.0136628	0.134	0.184	1	0
ENSMUSG00000040855	Reps2	0.0673244	0.0681543	-0.109102	0.0279508	0.613	0.685	1	0
ENSMUSG00000026914	Psmd14	0.0673377	0.0378144	-0.0610559	0.019004	0.3805	0.462	1	0
ENSMUSG00000017677	Wsb1	0.0673983	0.0337599	-0.0766287	0.00654637	0.1915	0.247	1	0
ENSMUSG00000037907	Ankrd13b	0.0674224	0.0820877	-0.0723034	0.0255921	0.134	0.189	1	0
ENSMUSG00000029253	Cenpc1	0.0674525	0.0406021	-0.083121	0.0120967	0.269	0.331	1	0
ENSMUSG00000040843	Tiprl	0.0674947	0.0326015	0.072691	0.00699527	0.13	0.089	1	0
ENSMUSG00000087368	BC065397	0.0676465	0.0299169	-0.0485611	0.00498847	0.063	0.1	1	0
ENSMUSG00000045100	Slc25a26	0.067739	0.0250296	-0.0727312	0.00224453	0.169	0.223	1	0
ENSMUSG00000052407	Ccdc171	0.0677933	0.0158369	-0.0549707	0.00495214	0.072	0.11	1	0
ENSMUSG00000024236	Svil	0.0678293	0.0102863	-0.0523594	0.00215447	0.1865	0.247	1	0
ENSMUSG00000027810	Eif2a	0.0678628	0.0538093	-0.054765	0.0112724	0.16	0.215	1	0
ENSMUSG00000038187	Btbd10	0.0679009	0.0253131	-0.0919545	0.00945456	0.303	0.367	1	0
ENSMUSG00000042524	Sun2	0.0679076	0.0108807	-0.0560816	0.00231062	0.1375	0.189	1	0
ENSMUSG00000056050	Mia3	0.0680114	0.0462523	-0.0490049	0.0234525	0.197	0.26	1	0
ENSMUSG00000044647	Csrnp3	0.0680505	0.0397408	-0.0778994	0.00280644	0.7755	0.832	1	0
ENSMUSG00000038633	Degs1	0.0681198	0.0353538	0.0658879	0.01636	0.122	0.081	1	0
ENSMUSG00000026150	Mff	0.0683249	0.0548042	-0.0865491	0.0192283	0.223	0.281	1	0
ENSMUSG00000009863	Sdhb	0.0683328	0.0273167	0.0910817	0	0.203	0.155	1	0
ENSMUSG00000059439	Bcas3	0.0685991	0.00801313	-0.0571721	0.00135207	0.562	0.627	1	0
ENSMUSG00000038174	Fam126b	0.0686051	0.0467118	-0.0876724	0.0182499	0.3375	0.396	1	0
ENSMUSG00000032009	Sesn3	0.0686123	0.015814	-0.0492848	0.00472652	0.4435	0.533	1	0
ENSMUSG00000084947	Gm15594	0.0687554	0.0791241	-0.0802958	0.0269063	0.168	0.226	1	0
ENSMUSG00000026696	Vamp4	0.0690859	0.0594888	-0.0532164	0.0162483	0.139	0.192	1	0
ENSMUSG00000030718	Ppme1	0.0691343	0.0274873	-0.0740745	0.0206513	0.2415	0.302	1	0
ENSMUSG00000028127	Abcd3	0.0692013	0.0402659	-0.0775188	0	0.202	0.26	1	0
ENSMUSG00000021917	Spcs1	0.0692863	0.00164182	0.0863135	0.00646342	0.202	0.155	1	0
ENSMUSG00000060534	Dcc	0.069356	0.00822069	-0.0513808	0.00177818	0.996	0.995	1	0	SFARI					2	0
ENSMUSG00000021687	Scamp1	0.0693717	0.0234773	-0.0647927	0.00956089	0.303	0.37	1	0
ENSMUSG00000042138	Msantd2	0.0693891	0.0655533	-0.0737438	0.0213774	0.113	0.16	1	0	SFARI					2	0
ENSMUSG00000006728	Cdk4	0.0694626	0.0109471	-0.0567144	0	0.101	0.144	1	0
ENSMUSG00000024982	Zdhhc6	0.0694783	0.0644302	-0.0499876	0.0123955	0.0725	0.113	1	0
ENSMUSG00000033396	Spg11	0.0695906	0.000231095	-0.0552706	0.00241453	0.089	0.131	1	0
ENSMUSG00000026202	Tuba4a	0.069626	0.0270828	0.0997407	0.00629071	0.214	0.165	1	0
ENSMUSG00000020312	Shc2	0.0696716	0.0430436	-0.0537379	0.00749188	0.0695	0.108	1	0
ENSMUSG00000059447	Hadhb	0.0696729	0.0397187	-0.0631535	0.00740129	0.085	0.126	1	0
ENSMUSG00000020459	Mtif2	0.0697653	0.0462057	-0.0514752	0.0164542	0.226	0.291	1	0
ENSMUSG00000021972	Hmbox1	0.0698087	0.0700416	-0.100547	0.023045	0.3815	0.454	1	0
ENSMUSG00000024403	Atp6v1g2	0.0699217	0.0615331	-0.0444535	0.00709254	0.113	0.163	1	0
ENSMUSG00000014077	Chp1	0.0699955	0.065298	-0.0443557	0.0195716	0.0825	0.126	1	0
ENSMUSG00000038895	Zfp653	0.070014	0.0757415	-0.0505922	0.012548	0.063	0.102	1	0
ENSMUSG00000036611	Eepd1	0.070085	0.00374833	-0.0671179	0.00462649	0.126	0.173	1	0
ENSMUSG00000026018	Ica1l	0.0702364	0.0187514	-0.0744622	0.00432263	0.1965	0.252	1	0
ENSMUSG00000046182	Gsg1l	0.0703325	0.05305	-0.0861651	0.0324863	0.4735	0.562	1	0
ENSMUSG00000022174	Dad1	0.0704001	0.0440885	0.0859394	0.00643623	0.197	0.147	1	0
ENSMUSG00000026058	Khdrbs2	0.0704829	0.0353387	0.178244	0.0141361	0.353	0.297	1	0	SFARI					2	0
ENSMUSG00000009207	Lnpk	0.0705254	0.0361079	-0.078538	0.0135376	0.311	0.375	1	0	SFARI						1
ENSMUSG00000062202	Btbd9	0.0706727	0.0576186	-0.0916375	0.028339	0.247	0.31	1	0
ENSMUSG00000041453	Rpl21	0.0706938	0.0226052	0.102971	0.00453396	0.1335	0.094	1	0
ENSMUSG00000016495	Plgrkt	0.0707021	0.0112859	-0.0629121	0.00233175	0.1375	0.186	1	0
ENSMUSG00000042807	Hecw2	0.0708947	0.020554	-0.112971	0.0139131	0.8335	0.882	1	0	SFARI					2	0
ENSMUSG00000029328	Hnrnpdl	0.0709123	0.029593	-0.0156493	0.0103719	0.482	0.583	1	0
ENSMUSG00000028343	Erp44	0.0709441	0.0337712	-0.0610413	0.0132201	0.185	0.241	1	0
ENSMUSG00000045967	Gpr158	0.0711647	0.0550534	-0.0971477	0.0261254	0.9555	0.979	1	0
ENSMUSG00000097375	6720427I07Rik	0.0711921	0.0715976	-0.0673148	0.0166266	0.117	0.165	1	0
ENSMUSG00000033629	Hacd3	0.071341	0.0277125	-0.0539838	0.00598324	0.265	0.333	1	0
ENSMUSG00000013787	Ehmt2	0.0714672	0.0746974	-0.0649781	0.0206096	0.1465	0.202	1	0
ENSMUSG00000034252	Senp6	0.0715838	0.0457597	-0.0672851	0.0187813	0.387	0.459	1	0
ENSMUSG00000035045	Zc3h12b	0.0716409	0.0246201	-0.0894581	0.0132365	0.3125	0.367	1	0
ENSMUSG00000031913	Vps4a	0.071647	0.0780509	-0.0488306	0.0150392	0.063	0.102	1	0
ENSMUSG00000025816	Sec61a2	0.0717628	0.0911879	-0.0986433	0.0304542	0.262	0.331	1	0
ENSMUSG00000032264	Zw10	0.0718613	0.0152157	-0.0466831	0.00248512	0.072	0.11	1	0
ENSMUSG00000067851	Arfgef1	0.071936	0.0664408	-0.074118	0.0260337	0.4465	0.509	1	0
ENSMUSG00000018567	Gabarap	0.0719971	0.04818	0.0395978	0.0120159	0.11	0.071	1	0
ENSMUSG00000057236	Rbbp4	0.0720386	0.0107815	-0.0669701	0.00225445	0.1585	0.213	1	0
ENSMUSG00000036748	Cuedc2	0.072146	0.0675484	0.0686503	0.0189799	0.11	0.071	1	0
ENSMUSG00000027423	Snx5	0.0722668	0.0631275	-0.0640464	0.0194782	0.0955	0.139	1	0	SFARI					2	0
ENSMUSG00000085667	Gm12992	0.0722944	0.034707	-0.0745113	0.00240316	0.1115	0.155	1	0
ENSMUSG00000029833	Trim24	0.0723786	0.00188666	-0.0490204	0	0.123	0.171	1	0
ENSMUSG00000070426	Rnf121	0.0723791	0.0416882	-0.0652953	0.00472288	0.1285	0.176	1	0
ENSMUSG00000042439	Zfp532	0.0726389	0.0544507	-0.0661201	0.0207775	0.2345	0.299	1	0
ENSMUSG00000020362	Cnot6	0.0727716	0.0198913	-0.0613105	0.0158868	0.1585	0.21	1	0
ENSMUSG00000030068	Gm20696	0.0727892	0.0226632	-0.0901564	0.01503	0.3395	0.402	1	0
ENSMUSG00000028020	Glrb	0.0727905	0.016932	-0.0759179	0.0062394	0.2295	0.289	1	0
ENSMUSG00000039841	Zfp800	0.0727947	0.00568469	-0.0623944	0.00948974	0.113	0.157	1	0
ENSMUSG00000057541	Pus7	0.0728388	0.019944	-0.0517953	0.0139747	0.1325	0.181	1	0
ENSMUSG00000059890	Ube4a	0.0729141	0.0149776	-0.0519546	0.00831075	0.248	0.312	1	0
ENSMUSG00000097640	Gm20033	0.0729705	0.0307731	-0.0573943	0.00973888	0.0895	0.131	1	0
ENSMUSG00000001891	Ugp2	0.0730053	0.0431754	-0.0699824	0.00741923	0.075	0.113	1	0
ENSMUSG00000024302	Dtna	0.0730415	0.00953867	-0.112367	0.0155318	0.534	0.606	1	0
ENSMUSG00000018501	Ncor1	0.0730682	0.0815171	-0.0733218	0.044994	0.583	0.654	1	0	SFARI					2	0
ENSMUSG00000041650	Pcca	0.0730687	0.0215432	-0.0577932	0.00185311	0.32	0.391	1	0	SFARI						1
ENSMUSG00000063275	Hacd1	0.0731643	0.0282219	-0.0472761	0.0117124	0.118	0.165	1	0
ENSMUSG00000042099	Kank3	0.0732269	0.0433956	-0.0483287	0.00496419	0.0695	0.108	1	0
ENSMUSG00000064061	Dzip3	0.0733526	0.0375937	-0.0803253	0.00758471	0.4935	0.567	1	0
ENSMUSG00000039233	Tbce	0.0733932	0.0246162	-0.0804929	0.00418091	0.2415	0.299	1	0
ENSMUSG00000032549	Rab6b	0.0735834	0.0369966	0.126498	0.022356	0.522	0.467	1	0
ENSMUSG00000057530	Ece1	0.0735861	0.0903465	-0.063897	0.0236005	0.201	0.265	1	0
ENSMUSG00000027820	Mme	0.0736231	0.00855673	-0.127199	0.00202208	0.2425	0.294	1	0
ENSMUSG00000040548	Tex2	0.0736742	0.0329804	-0.0608416	0.00237518	0.117	0.163	1	0
ENSMUSG00000029516	Cit	0.0737619	0.0455105	-0.059608	0.0202265	0.5975	0.688	1	0
ENSMUSG00000053395	Cacng8	0.0740061	0.0620078	-0.0520098	0.00935914	0.126	0.176	1	0
ENSMUSG00000004285	Atp6v1f	0.0740583	0.0561879	0.0818618	0.00938066	0.1165	0.079	1	0
ENSMUSG00000096938	9530052E02Rik	0.0740858	0.0323692	-0.0545933	0.00983275	0.0785	0.118	1	0
ENSMUSG00000022283	Pabpc1	0.0741804	0.0606207	0.101315	0.0381969	0.265	0.213	1	0	SFARI					3	0
ENSMUSG00000029176	Anapc4	0.0743167	0.0222924	-0.079494	0.00444506	0.181	0.231	1	0
ENSMUSG00000032601	Prkar2a	0.0744862	0.0637491	0.072001	0.0115532	0.1285	0.087	1	0
ENSMUSG00000001157	Gmcl1	0.0745076	0.0612047	-0.0641717	0.015457	0.3135	0.381	1	0
ENSMUSG00000031939	Taf1d	0.0745153	0.00194604	-0.0324246	0.00421546	0.2115	0.27	1	0
ENSMUSG00000039968	Rsbn1l	0.0745746	0.0718564	-0.05923	0.0178802	0.256	0.323	1	0
ENSMUSG00000028982	Slc25a33	0.0745827	0.0628637	-0.0584981	0.0216803	0.0985	0.142	1	0
ENSMUSG00000004364	Cul3	0.0748006	0.0704927	-0.0864913	0.0309986	0.354	0.425	1	0	SFARI;EAGLE;TADA	0.00814579	Definitive	18.4	Concordant	1	0
ENSMUSG00000022685	Parn	0.074844	0.0457117	-0.0598844	0.0086453	0.1955	0.252	1	0
ENSMUSG00000028692	Akr1a1	0.0748459	0.0751984	-0.0436772	0.0225316	0.0615	0.1	1	0
ENSMUSG00000024360	Etf1	0.074857	0.00211151	-0.0715542	0.0023054	0.142	0.189	1	0
ENSMUSG00000028568	Btf3l4	0.0748694	0.0154251	-0.049843	0.00247307	0.0745	0.113	1	0
ENSMUSG00000094870	Zfp131	0.0749256	0.0500583	-0.0565995	0.00960138	0.105	0.15	1	0
ENSMUSG00000021962	Dcp1a	0.0749402	0.0285398	-0.0524829	0.0094458	0.1235	0.171	1	0
ENSMUSG00000053644	Aldh7a1	0.0750574	0.0548537	-0.056728	0.00743726	0.0785	0.118	1	0
ENSMUSG00000039717	Ralyl	0.0751399	0.0485706	-0.210311	0.0143347	0.3465	0.417	1	0
ENSMUSG00000050471	Fam118b	0.0752666	0.032215	-0.0387297	0.00666035	0.164	0.22	1	0
ENSMUSG00000037996	Slc24a2	0.0752692	0.0334847	-0.0978455	0.0137737	0.866	0.892	1	0	SFARI					2	0
ENSMUSG00000112201	4930532I03Rik	0.0754296	0.0535078	-0.0540816	0.00973888	0.089	0.131	1	0
ENSMUSG00000026275	Ppp1r7	0.0754344	0.0645889	-0.0723945	0.0125945	0.2335	0.294	1	0
ENSMUSG00000024283	Wac	0.0755186	0.0452522	-0.0779979	0.018056	0.429	0.514	1	0	SFARI;EAGLE;TADA	3.92e-06	Definitive	15	Concordant	1	1
ENSMUSG00000041303	Gtf3c3	0.075796	0.00778276	-0.0560816	0.00231062	0.1325	0.181	1	0
ENSMUSG00000029207	Apbb2	0.0758798	0.0835675	-0.0209837	0.0262261	0.3395	0.436	1	0
ENSMUSG00000059291	Rpl11	0.075891	0.00291149	0.0898324	0.00671884	0.16	0.118	1	0
ENSMUSG00000033910	Gucy1a1	0.0759718	0.0678091	-0.090469	0.00900129	0.496	0.575	1	0
ENSMUSG00000051855	Mest	0.0760108	0.0045169	0.0548959	0.00846594	0.181	0.134	1	0
ENSMUSG00000020069	Hnrnph3	0.0760547	0.0401749	-0.0499165	0.00194127	0.2965	0.367	1	0
ENSMUSG00000020220	Vps13d	0.0761	0.0787196	-0.0683667	0.0221998	0.2625	0.331	1	0
ENSMUSG00000001424	Snd1	0.0762401	0.0418003	-0.0703297	0.00178815	0.3645	0.438	1	0	SFARI					2	0
ENSMUSG00000052459	Atp6v1a	0.0763217	0.0821763	-0.0576316	0.0335971	0.1625	0.22	1	0
ENSMUSG00000018411	Mapt	0.0763433	0.0343221	0.123196	0.00435647	0.509	0.465	1	0	SFARI					3	0
ENSMUSG00000029432	Nipsnap2	0.0765638	0.0932607	-0.108375	0.0264986	0.181	0.239	1	0
ENSMUSG00000042272	Sestd1	0.0765867	0.00770941	-0.0745099	0.013512	0.155	0.205	1	0
ENSMUSG00000041765	Ubac2	0.0766379	0.0129346	-0.056934	0.00631667	0.206	0.265	1	0
ENSMUSG00000020671	Rab10	0.0767298	0.0442607	-0.0487365	0.00778736	0.291	0.357	1	0
ENSMUSG00000069094	Pde7a	0.0767348	0.00279037	-0.0791008	0.00676338	0.176	0.226	1	0
ENSMUSG00000036438	Calm2	0.0767855	0.012946	0.146455	0	0.756	0.769	1	0
ENSMUSG00000021460	Auh	0.076925	0.0519195	-0.0663933	0.00914929	0.1535	0.205	1	0
ENSMUSG00000115463	Gm49356	0.0770855	0.0431369	-0.0522315	0.00727808	0.083	0.123	1	0
ENSMUSG00000059288	Cdyl	0.0771672	0.0612553	-0.0530977	0.0162114	0.122	0.171	1	0
ENSMUSG00000014329	Bicc1	0.0772154	0.0162768	-0.0672758	0.00249728	0.0695	0.105	1	0
ENSMUSG00000050556	Kcnb1	0.0773009	0.0206438	-0.0672447	0.0104274	0.3855	0.459	1	0	SFARI;TADA	0.00319791				1	1
ENSMUSG00000029524	Sirt4	0.0775231	0.0165042	-0.0507489	0.00486941	0.088	0.129	1	0
ENSMUSG00000022186	Oxct1	0.0776307	0.0231825	-0.0952827	0.0100507	0.5225	0.593	1	0
ENSMUSG00000033624	Pdpr	0.0776823	0.0474318	-0.0424871	0.0046903	0.118	0.165	1	0
ENSMUSG00000020435	Osbp2	0.0776915	0.081189	-0.0676737	0.03008	0.58	0.688	1	0
ENSMUSG00000039385	Cdh6	0.0777254	0.0506862	-0.0629347	0.0116589	0.1155	0.16	1	0
ENSMUSG00000021703	Serinc5	0.0778038	0.0662189	-0.0516292	0.020246	0.155	0.21	1	0
ENSMUSG00000024222	Fkbp5	0.0779721	0.0529269	-0.0903274	0.0136324	0.164	0.213	1	0
ENSMUSG00000051098	Mblac2	0.0781574	0.0504139	-0.065482	0.0129133	0.2165	0.273	1	0
ENSMUSG00000000804	Usp32	0.078267	0.0602974	-0.068612	0.0100791	0.525	0.614	1	0
ENSMUSG00000026527	Rgs7	0.0782725	0.0232746	-0.0748324	0	0.7885	0.866	1	0	SFARI					2	0
ENSMUSG00000010517	Faf1	0.0783492	0.0184336	-0.0743516	0.00124029	0.622	0.722	1	0
ENSMUSG00000021767	Kat6b	0.0787683	0.0932967	-0.0564161	0.0357562	0.6525	0.727	1	0	SFARI					3	0
ENSMUSG00000029089	5730480H06Rik	0.0788296	0.0413895	-0.0626798	0.00953408	0.106	0.15	1	0
ENSMUSG00000026312	Cdh7	0.0788693	0.0426694	-0.0963457	0.00548955	0.311	0.37	1	0
ENSMUSG00000047246	H2bc6	0.0791328	0.0172507	-0.0612599	0.00491634	0.08	0.118	1	0
ENSMUSG00000009555	Cdk9	0.0791452	0.0288718	-0.0572031	0.0130232	0.1995	0.255	1	0
ENSMUSG00000061755	Bod1l	0.0792192	0.0368687	-0.0960843	0.0111492	0.167	0.215	1	0
ENSMUSG00000030057	Cnbp	0.0792539	0.0464697	-0.0436582	0.0134231	0.1625	0.218	1	0
ENSMUSG00000028137	Celf3	0.0793741	0.096857	0.0985604	0.0378206	0.3855	0.32	1	0
ENSMUSG00000037110	Ralgapa2	0.0793753	0.0200234	-0.0525488	0.00315345	0.4275	0.501	1	0
ENSMUSG00000073147	5031425E22Rik	0.0794095	0.0276305	-0.0360854	0.0017819	0.3375	0.42	1	0
ENSMUSG00000005338	Cadm3	0.0794188	0.0890394	0.0835674	0.0426899	0.218	0.163	1	0
ENSMUSG00000025964	Adam23	0.0795872	0.0453836	-0.0989258	0.00789789	0.8175	0.85	1	0
ENSMUSG00000025817	Nudt5	0.0796573	0.0322474	-0.0552338	0.0049763	0.0735	0.11	1	0
ENSMUSG00000007670	Khsrp	0.0796671	0.0765836	-0.0335285	0.0217522	0.1785	0.239	1	0
ENSMUSG00000041763	Tpp2	0.0797288	0.067594	-0.0703018	0.0150855	0.3125	0.381	1	0
ENSMUSG00000058013	Septin11	0.079786	0.0468876	-0.038768	0.0125392	0.3475	0.428	1	0
ENSMUSG00000018171	Vmp1	0.0798941	0.058795	-0.110976	0.0127919	0.407	0.472	1	0
ENSMUSG00000048355	Arxes1	0.079896	0.0161655	0.0673464	0.0071589	0.1065	0.071	1	0
ENSMUSG00000053347	Zfp943	0.0799529	0.0500498	-0.061806	0.0108874	0.2085	0.265	1	0
ENSMUSG00000027742	Cog6	0.0800637	0.0846763	-0.0484251	0.0215784	0.0985	0.144	1	0
ENSMUSG00000024949	Sf1	0.0803429	0.0441523	-0.0561742	0.00188391	0.3205	0.388	1	0
ENSMUSG00000042408	Zmym6	0.0804108	0.0558893	-0.054707	0.013135	0.185	0.241	1	0
ENSMUSG00000048109	Rbm15	0.080595	0.0021626	-0.0662135	0.00233709	0.129	0.173	1	0
ENSMUSG00000024273	2700062C07Rik	0.0806192	0.012889	-0.0436488	0.00232114	0.13	0.178	1	0
ENSMUSG00000024030	Abcg1	0.0811847	0.0434394	-0.0568393	0.00234246	0.131	0.178	1	0
ENSMUSG00000116305	Lncppara	0.0813096	0.0376035	-0.0492474	0.00472288	0.117	0.163	1	0
ENSMUSG00000068284	Usf3	0.0813315	0.00611604	-0.0616807	0.0046903	0.135	0.181	1	0
ENSMUSG00000111061	Gm46102	0.0814788	0.0521907	-0.0489271	0.0100507	0.064	0.1	1	0
ENSMUSG00000020114	Cand1	0.0814881	0.0303831	-0.0585613	0.00724362	0.1025	0.144	1	0
ENSMUSG00000117521	Gm50024	0.0814989	0.0376784	-0.0696626	0.0144119	0.251	0.307	1	0
ENSMUSG00000040563	Plppr2	0.0815901	0.0519774	-0.0601788	0.0117394	0.126	0.173	1	0
ENSMUSG00000030982	Vps35l	0.0817487	0.112914	-0.0723385	0.0364809	0.0945	0.147	1	0
ENSMUSG00000019977	Hbs1l	0.0819716	0.0896151	-0.0713419	0.0315858	0.2335	0.297	1	0
ENSMUSG00000057375	Yipf1	0.0822002	0.0511705	-0.0471438	0.00752874	0.064	0.1	1	0
ENSMUSG00000001985	Grik3	0.0822151	0.0763958	-0.0786907	0.0195115	0.558	0.635	1	0	SFARI					2	0
ENSMUSG00000030216	Wbp11	0.0825182	0.0777595	-0.0470119	0.0144703	0.097	0.142	1	0
ENSMUSG00000025420	Katnal2	0.0825428	0.0526702	-0.0429154	0.0172283	0.075	0.113	1	0	SFARI;EAGLE		Limited	4.1	Discordant	1	0
ENSMUSG00000032586	Traip	0.0825862	0.0632456	-0.0839665	0.027903	0.3795	0.449	1	0
ENSMUSG00000032435	Dync1li1	0.0826428	0.0912246	-0.0752247	0.020891	0.1405	0.192	1	0
ENSMUSG00000022635	Zcrb1	0.0827122	0.0124487	0.0713603	0.00228988	0.1455	0.105	1	0
ENSMUSG00000021196	Pfkp	0.0827748	0.0282737	-0.0290911	0.00197893	0.2585	0.331	1	0
ENSMUSG00000027665	Pik3ca	0.0827957	0.00268243	-0.0659729	0.00222011	0.192	0.244	1	0	SFARI					3	0
ENSMUSG00000038372	Gmds	0.0828248	0.00018932	-0.0781509	0.00391609	0.2745	0.333	1	0
ENSMUSG00000050017	Pitpnb	0.0828702	0.047909	-0.0523702	0.0121591	0.0905	0.131	1	0
ENSMUSG00000050891	Tatdn1	0.0830624	0.00218498	-0.0573559	0.00236417	0.123	0.168	1	0
ENSMUSG00000036499	Eea1	0.0831486	0.00317624	0.0942054	0.00211428	0.2165	0.171	1	0
ENSMUSG00000018770	Atp5g3	0.0831933	0.0199046	0.0962153	0	0.2365	0.186	1	0
ENSMUSG00000049971	Glt1d1	0.0832069	0.0334513	-0.05223	0	0.122	0.168	1	0
ENSMUSG00000022514	Il1rap	0.0832131	0.00901764	-0.0624149	0.00731286	0.0825	0.121	1	0
ENSMUSG00000033793	Atp6v1h	0.0833335	0.00596846	-0.111963	0.00322829	0.4595	0.514	1	0
ENSMUSG00000035476	Tab3	0.0833619	0.0173242	-0.0471992	0.00484628	0.0905	0.131	1	0
ENSMUSG00000068740	Celsr2	0.083447	0.0120175	0.0732411	0.00673362	0.1695	0.126	1	0
ENSMUSG00000036095	Dgkb	0.0834703	0.0275468	-0.0481238	0.00679581	0.9985	1	1	0
ENSMUSG00000001419	Mef2d	0.0834919	0.0197795	0.0881306	0.0138797	0.2875	0.236	1	0
ENSMUSG00000021610	Clptm1l	0.0835412	0.0614604	0.0719788	0.0161747	0.1375	0.097	1	0
ENSMUSG00000032826	Ank2	0.0837219	0.0895666	-0.101939	0.0326996	0.9215	0.934	1	0	SFARI;EAGLE;TADA	0.00174365	Moderate	10.8	Discordant	1	0
ENSMUSG00000046192	Iqub	0.0837538	0.0198159	-0.0278161	0.00496419	0.0645	0.1	1	0
ENSMUSG00000031691	Tnpo2	0.0839978	0.0454587	-0.045921	0.00733037	0.0905	0.131	1	0
ENSMUSG00000039652	Cpeb3	0.0840177	0.0113043	-0.0873034	0.00669825	0.5095	0.575	1	0
ENSMUSG00000038206	Fbxo8	0.0840248	0.0847712	-0.0830009	0.0166557	0.236	0.294	1	0
ENSMUSG00000055003	Lrtm2	0.0840315	0.0533739	0.0602916	0.0071589	0.11	0.073	1	0
ENSMUSG00000032946	Rasgrp2	0.0841125	0.0817399	0.0892264	0.0470333	0.5185	0.454	1	0
ENSMUSG00000041268	Dmxl2	0.084202	0.018239	-0.0561481	0.0144498	0.56	0.627	1	0	SFARI					2	0
ENSMUSG00000025651	Uqcrc1	0.0842828	0.0327977	0.0845996	0.0190291	0.223	0.176	1	0
ENSMUSG00000010554	Mettl16	0.0842866	0.0182602	-0.0576255	0.00712557	0.114	0.157	1	0
ENSMUSG00000020532	Acaca	0.084408	0.0397669	-0.0977529	0.00420677	0.2125	0.268	1	0
ENSMUSG00000025362	Rps26	0.0844365	0.10798	-0.0559124	0.0268152	0.092	0.139	1	0
ENSMUSG00000028266	Lmo4	0.0848173	0.0192211	0.10384	0.00970644	0.2915	0.241	1	0
ENSMUSG00000055254	Ntrk2	0.0848307	0.0141831	-0.181578	0.015457	0.6995	0.751	1	0	SFARI						1
ENSMUSG00000049556	Lingo1	0.0851397	0.0258439	0.0811483	0.00210555	0.227	0.178	1	0
ENSMUSG00000021470	Ercc6l2	0.0854036	0.0740375	-0.0651043	0.0240558	0.185	0.239	1	0
ENSMUSG00000038774	Ascc3	0.0854081	0.038952	-0.0668489	0.00276461	0.558	0.635	1	0
ENSMUSG00000020953	Coch	0.0855932	0.0207054	-0.0756762	0.00215447	0.189	0.239	1	0
ENSMUSG00000000194	Gpr107	0.0857015	0.101081	-0.0545897	0.0214273	0.109	0.157	1	0
ENSMUSG00000058799	Nap1l1	0.0859129	0.105618	-0.0809134	0.0448106	0.3765	0.459	1	0
ENSMUSG00000009575	Cbx5	0.0860792	0.00807539	-0.0682975	0.0023002	0.1455	0.192	1	0
ENSMUSG00000021156	Zmynd11	0.0862178	0.000610508	-0.068975	0.00144803	0.5195	0.598	1	0	SFARI					2	0
ENSMUSG00000023079	Gtf2ird1	0.0863081	0.0836488	-0.0573514	0.0300063	0.3135	0.386	1	0
ENSMUSG00000021458	Aopep	0.0864015	0.0405356	-0.079997	0.00996887	0.424	0.493	1	0
ENSMUSG00000020525	Ppm1d	0.0864446	0.056911	-0.0864178	0.00419811	0.2165	0.268	1	0	SFARI					2	1
ENSMUSG00000042105	Inpp5f	0.0864779	0.0543307	-0.0136085	0.0329385	0.349	0.436	1	0
ENSMUSG00000018334	Ksr1	0.0866295	0.0268466	-0.0642849	0.00489276	0.0815	0.118	1	0
ENSMUSG00000067847	Romo1	0.0867348	0.0546152	0.0439161	0.0188484	0.1205	0.081	1	0
ENSMUSG00000020181	Nav3	0.0867383	0.0254475	0.11985	0	0.7745	0.74	1	0	SFARI					2	0
ENSMUSG00000030876	Mettl9	0.0868582	0.0502463	-0.0738509	0.00931641	0.1415	0.186	1	0
ENSMUSG00000035653	Lrfn5	0.0868877	0.0495559	-0.0671011	0.0307695	0.958	0.982	1	0	SFARI					2	0
ENSMUSG00000048330	Ric3	0.0869374	0.00212947	-0.0614015	0.00239751	0.113	0.155	1	0
ENSMUSG00000029229	Chic2	0.0870095	0.00704717	-0.051534	0.00463701	0.1275	0.173	1	0
ENSMUSG00000022837	Iqcb1	0.0874513	0.0364064	-0.0351667	0.0167583	0.21	0.27	1	0
ENSMUSG00000024104	Washc2	0.0874755	0.0350691	-0.0369672	0.00962403	0.0945	0.136	1	0
ENSMUSG00000054871	Tmem158	0.0875759	0.00397372	0.111812	0.0034581	0.4065	0.354	1	0
ENSMUSG00000062526	Mppe1	0.0876245	0.0252872	-0.0519946	0	0.1235	0.168	1	0
ENSMUSG00000074785	Plxnc1	0.0876485	0.0298432	-0.0557888	0.00243761	0.0915	0.131	1	0
ENSMUSG00000036372	Tmem258	0.0877832	0.0436546	0.0722202	0.00948974	0.109	0.073	1	0
ENSMUSG00000048076	Arf1	0.0878141	0.0587841	0.0626588	0.015575	0.1745	0.129	1	0
ENSMUSG00000029270	Dipk1a	0.0879606	0.0345321	-0.0476111	0.00855468	0.185	0.241	1	0
ENSMUSG00000026575	Nme7	0.0879904	0.0983155	0.095658	0.0392082	0.404	0.339	1	0
ENSMUSG00000022048	Dpysl2	0.0884205	0.0498931	0.127883	0.0169744	0.404	0.365	1	0	SFARI;EAGLE;TADA	0.0939591	Limited	1	Discordant	1	0
ENSMUSG00000028906	Epb41	0.0884468	0.0529525	-0.0896437	0.0163413	0.702	0.748	1	0
ENSMUSG00000047215	Rpl9	0.0884946	0.0190314	0.0742232	0.0108874	0.193	0.147	1	0
ENSMUSG00000030726	Pold3	0.0886112	0.0706308	-0.0674684	0.0166654	0.1145	0.157	1	0
ENSMUSG00000030064	Frmd4b	0.0887647	0.0350229	-0.107289	0.0174931	0.441	0.509	1	0
ENSMUSG00000025025	Mxi1	0.0888537	0.0124788	-0.0694648	0	0.1535	0.199	1	0
ENSMUSG00000070002	Ell	0.0888972	0.00451915	-0.0611282	0.0071589	0.115	0.157	1	0
ENSMUSG00000003038	Hmgn2	0.0890291	0.0529308	-0.0502105	0.00747358	0.0695	0.105	1	0
ENSMUSG00000032479	Map4	0.0890368	0.031171	-0.0604756	0.00793887	0.2715	0.333	1	0
ENSMUSG00000031954	Cfdp1	0.0892097	0.055128	-0.0637924	0.00674847	0.1585	0.207	1	0
ENSMUSG00000067424	Zfp563	0.089242	0.069331	-0.0551361	0.0148928	0.0735	0.11	1	0
ENSMUSG00000039307	Hexdc	0.0892546	0.0135912	-0.0299759	0.00225445	0.1375	0.186	1	0
ENSMUSG00000030166	Rad52	0.0892785	0.0781746	-0.0496318	0.0123058	0.0775	0.115	1	0
ENSMUSG00000018661	Cog1	0.0894036	0.0821176	-0.0483928	0.0198574	0.0745	0.113	1	0
ENSMUSG00000028898	Trnau1ap	0.0894621	0.0333526	-0.0688419	0.00729543	0.097	0.136	1	0
ENSMUSG00000019518	Ap4m1	0.0895316	0.0614149	-0.0484814	0.0120159	0.097	0.139	1	0
ENSMUSG00000002059	Rab34	0.0896873	0.0140123	-0.0469756	0	0.0955	0.136	1	0
ENSMUSG00000037032	Apbb1	0.0898424	0.0561006	0.0683715	0.0094458	0.118	0.081	1	0	SFARI;TADA	0.0307911				2	0
ENSMUSG00000008690	Ncaph2	0.0898466	0.0150731	-0.0391101	0.00243761	0.0825	0.121	1	0	SFARI					3	0
ENSMUSG00000028030	Tbck	0.0899224	0.0909457	-0.0987592	0.0223768	0.2665	0.32	1	0	SFARI;EAGLE		Limited	1	Discordant	1	1
ENSMUSG00000045427	Hnrnph2	0.0900061	0.0202926	-0.0557103	0.00229503	0.1365	0.184	1	0	SFARI					1	0
ENSMUSG00000032625	Thsd7a	0.0900555	0.043941	0.135464	0.0220385	0.869	0.866	1	0
ENSMUSG00000054792	Klhl18	0.090345	0.0365888	-0.0498515	0.00741923	0.0785	0.115	1	0
ENSMUSG00000036964	Trim17	0.0903543	0	-0.0647363	0	0.087	0.123	1	0
ENSMUSG00000030766	Arhgap17	0.0903796	0.0403454	-0.0515661	0.00674847	0.156	0.205	1	0
ENSMUSG00000000056	Narf	0.090487	0.0763136	-0.0379762	0.0259471	0.1115	0.157	1	0
ENSMUSG00000048915	Efna5	0.0906572	0.0980079	-0.159908	0.00605426	0.3725	0.428	1	0
ENSMUSG00000026987	Baz2b	0.0906786	0.0588892	-0.0505331	0.0198092	0.42	0.493	1	0	SFARI;EAGLE		Moderate	7.35	Discordant	1	0
ENSMUSG00000002997	Prkar2b	0.0907423	0.0729595	-0.0330525	0.0137138	0.454	0.546	1	0
ENSMUSG00000043987	Cep164	0.0908191	0.0303166	-0.0556583	0.0024318	0.0945	0.134	1	0
ENSMUSG00000063108	Zfp26	0.0910228	0.00440962	-0.0593011	0.0047559	0.113	0.155	1	0
ENSMUSG00000062949	Atp11c	0.0912738	0.0323662	-0.0164381	0.023247	0.3015	0.375	1	0
ENSMUSG00000028557	Rnf11	0.0913843	0.0480164	-0.0512295	0.00491634	0.085	0.123	1	0
ENSMUSG00000041907	Gpr45	0.0913931	0	-0.0592972	0	0.11	0.152	1	0
ENSMUSG00000020149	Rab1a	0.091405	0.0215211	-0.063503	0.0117664	0.1195	0.163	1	0
ENSMUSG00000021061	Sptb	0.0915094	0.0926789	-0.0575052	0.0315126	0.294	0.36	1	0
ENSMUSG00000071064	Zfp827	0.0917597	0.0505726	-0.0718508	0.0102117	0.2665	0.323	1	0	SFARI					2	0
ENSMUSG00000036427	Gpi1	0.0918044	0.0365404	0.0664676	0.00520038	0.416	0.354	1	0
ENSMUSG00000057522	Spop	0.0919618	0.0560009	-0.0750039	0.0155453	0.281	0.341	1	0
ENSMUSG00000034218	Atm	0.0919731	0.0148153	-0.0674212	0.00238072	0.1115	0.152	1	0
ENSMUSG00000031657	Heatr3	0.0920908	0.0154094	-0.0530383	0.00449401	0.1625	0.213	1	0
ENSMUSG00000028792	Ak2	0.0923234	0.0969918	-0.0488306	0.0150392	0.0655	0.102	1	0
ENSMUSG00000008200	Fnbp4	0.0927848	0.0618405	-0.0675183	0.00814487	0.257	0.315	1	0
ENSMUSG00000024359	Hspa9	0.0928395	0.047137	-0.0481376	0.0104846	0.2255	0.286	1	0
ENSMUSG00000026775	Yme1l1	0.0928625	0.0291251	-0.0554805	0.0217832	0.3425	0.415	1	0
ENSMUSG00000040952	Rps19	0.0929166	0.0273372	0.0697374	0.0045849	0.147	0.108	1	0
ENSMUSG00000026594	Ralgps2	0.09305	0.0347423	-0.0767559	0.0153696	0.3095	0.367	1	0
ENSMUSG00000024787	Snx15	0.0932089	0.0504286	-0.0508806	0.00976217	0.085	0.123	1	0
ENSMUSG00000034636	Zyg11b	0.093249	0.0825175	-0.0578297	0.0175512	0.177	0.231	1	0
ENSMUSG00000034686	Prr7	0.0933184	0.0876035	0.0990778	0.0145886	0.2375	0.189	1	0
ENSMUSG00000034755	Pcdh11x	0.0933188	0.0251298	-0.115946	0.0303128	0.6485	0.706	1	0	SFARI					2	0
ENSMUSG00000034602	Mon2	0.0933232	0.0514889	-0.0537745	0.00430439	0.1985	0.255	1	0
ENSMUSG00000042447	Mios	0.0934071	0.0955911	-0.0681218	0.0216292	0.109	0.152	1	0
ENSMUSG00000020847	Rph3al	0.0934296	0.0189701	-0.0636996	0.00969261	0.0985	0.136	1	0
ENSMUSG00000010110	Stx5a	0.093434	0.034091	-0.0530663	0.0134822	0.1625	0.213	1	0
ENSMUSG00000031353	Rbbp7	0.0935738	0.0230685	-0.0599616	0.00222011	0.1655	0.215	1	0
ENSMUSG00000063785	Utp14a	0.0935852	0.0362654	-0.0503227	0.00249728	0.0685	0.102	1	0
ENSMUSG00000014763	Fam120b	0.0935968	0.000571766	-0.0799691	0.00211428	0.228	0.278	1	0
ENSMUSG00000022471	Xrcc6	0.0937429	0.0837502	-0.0477557	0.0137241	0.143	0.194	1	0	SFARI					3	0
ENSMUSG00000089699	Gm1992	0.0940253	0.00197211	-0.0527159	0.00244932	0.084	0.121	1	0
ENSMUSG00000037022	Mmaa	0.094174	0.00159728	-0.0480762	0.00668946	0.172	0.223	1	0
ENSMUSG00000117222	Gm49906	0.0943048	0.0527511	-0.0740479	0.0165208	0.2075	0.26	1	0
ENSMUSG00000025228	Actr1a	0.0943345	0.0174753	-0.0521158	0.0046903	0.1165	0.16	1	0
ENSMUSG00000051483	Cbr1	0.0943651	0.0583465	0.0581793	0.00948974	0.118	0.081	1	0
ENSMUSG00000034566	Atp5h	0.0943825	0.0554006	0.0874628	0	0.2165	0.171	1	0
ENSMUSG00000022312	Eif3h	0.0946091	0.0364061	-0.0525842	0.00229503	0.14	0.186	1	0
ENSMUSG00000022800	Fyttd1	0.0948327	0.0972787	-0.0622696	0.0122664	0.252	0.318	1	0
ENSMUSG00000021013	Ttc8	0.0948623	0.116828	-0.0688576	0.0451064	0.35	0.428	1	0
ENSMUSG00000038250	Usp38	0.0949806	0.0292585	-0.0412944	0.00236966	0.1075	0.15	1	0
ENSMUSG00000028518	Prkaa2	0.0950063	0.0197077	-0.0388342	0.00927406	0.13	0.176	1	0
ENSMUSG00000036199	Ndufa13	0.0951408	0.00152531	0.0833018	0.00224453	0.157	0.118	1	0
ENSMUSG00000030102	Itpr1	0.0952044	0.0801227	-0.073447	0.0242849	0.963	0.982	1	0	SFARI					2	0
ENSMUSG00000042133	Ppig	0.0952925	0.00141157	-0.0780052	0.00390859	0.294	0.352	1	0
ENSMUSG00000001986	Gria3	0.0953815	0.0206675	-0.0683721	0.0011514	0.9485	0.971	1	0	SFARI						1
ENSMUSG00000062995	Ica1	0.0954486	0.0396645	-0.0706616	0.0141198	0.374	0.444	1	0	SFARI					2	0
ENSMUSG00000049313	Sorl1	0.0954746	0.0526294	0.0967509	0.00367618	0.341	0.291	1	0
ENSMUSG00000061458	Nol10	0.0956362	0.0173077	-0.0380133	0	0.072	0.108	1	0
ENSMUSG00000023809	Rps6ka2	0.0956811	0.0944343	-0.083061	0.0249843	0.235	0.291	1	0	SFARI					2	0
ENSMUSG00000037012	Hk1	0.09576	0.00208525	-0.0624067	0.00243761	0.089	0.126	1	0
ENSMUSG00000021103	Mnat1	0.0958612	0.0610126	-0.0889115	0.0242902	0.257	0.312	1	0
ENSMUSG00000022019	Tdrd3	0.0959711	0.0189909	-0.0331014	0.00205881	0.223	0.283	1	0
ENSMUSG00000070858	Gm1673	0.0961541	0.0289193	0.0544478	0	0.1205	0.084	1	0
ENSMUSG00000054611	Kdm2a	0.0961556	0.0192786	0.0819528	0.00520038	0.4065	0.349	1	0	SFARI					3	0
ENSMUSG00000026219	Trip12	0.0966206	0.0652418	-0.0754497	0.0171456	0.601	0.68	1	0	SFARI;EAGLE;TADA	0.00367138	Definitive	27	Concordant	1	1
ENSMUSG00000039473	Ubn1	0.0966419	0.0263803	-0.0579732	0	0.1365	0.181	1	0
[truncated: 3,989 more rows]

## Sheet: Ecc_MSN
ensembl	gene	p_val.mean	p_val.std	avg_log2FC.mean	avg_log2FC.std	pct.1.mean	pct.2.mean	padj.mean	padj.std	ASD.status	TADA.FDR	EAGLE.annotation	EAGLE.score	EAGLE.concordance	SFARI.score	SFARI.syndromic
ENSMUSG00000022748	Cmss1	5.43385e-06	9.59546e-07	0.670281	0.0120254	0.966	0.7615	0.134955	0.0238313
ENSMUSG00000034297	Med13	1.31469e-05	1.23098e-05	-0.486253	0.0188339	0.216	0.54	0.326516	0.305727	SFARI;EAGLE;TADA	0.00013387	Moderate	9.3	Discordant	1	1
ENSMUSG00000117222	Gm49906	4.01528e-05	7.62518e-06	-0.536048	0.00541189	0.261	0.574	0.931662	0.0966438
ENSMUSG00000003847	Nfat5	7.03842e-05	5.59399e-05	-0.437329	0.0209267	0.352	0.6705	0.88283	0.165703
ENSMUSG00000000085	Scmh1	9.61832e-05	8.34843e-05	-0.48964	0.0309157	0.33	0.6135	0.96134	0.0546739
ENSMUSG00000092341	Malat1	0.000121831	4.27936e-05	-0.288754	0.0119904	1	1	1	0
ENSMUSG00000024975	Pdcd4	0.000146505	1.09844e-05	-0.390451	0.0070113	0.193	0.466	1	0
ENSMUSG00000062054	Iah1	0.000304193	0.000236665	-0.210699	0.0198092	0.011	0.1705	1	0
ENSMUSG00000020435	Osbp2	0.000325098	0.000371357	-0.373158	0.0547858	0.17	0.4545	1	0
ENSMUSG00000036890	Gtdc1	0.000335743	0.000299769	-0.376257	0.00793887	0.091	0.3125	1	0
ENSMUSG00000041444	Arhgap32	0.000392786	0.000115052	-0.449677	0.0150392	0.42	0.659	1	0	SFARI					2	0
ENSMUSG00000004031	Brinp2	0.000494706	0.000526118	-0.528574	0.03153	0.398	0.6705	1	0
ENSMUSG00000098973	Mir6236	0.000618167	3.80348e-05	0.588072	0.0130789	0.943	0.818	1	0
ENSMUSG00000047466	8030462N17Rik	0.000669316	0.000600192	-0.391078	0.0255048	0.273	0.528	1	0
ENSMUSG00000040040	Ift88	0.000720116	0.000694571	-0.254117	0.0267301	0.045	0.233	1	0
ENSMUSG00000007892	Rplp1	0.000748709	0.000989519	0.519329	0.0588705	0.364	0.142	1	0
ENSMUSG00000041670	Rims1	0.000768882	0.000201885	-0.359593	0.0281436	0.909	0.955	1	0	SFARI;EAGLE		Moderate	11.35	Discordant	1	0
ENSMUSG00000022306	Zfpm2	0.000773787	0.000210566	-0.512579	0.0065604	0.125	0.3355	1	0
ENSMUSG00000024661	Fth1	0.000806097	0.00082868	0.411621	0.0420736	0.273	0.0795	1	0
ENSMUSG00000027499	Pkia	0.000829789	0.000290875	-0.393763	0.0385004	0.239	0.489	1	0
ENSMUSG00000040820	Hlcs	0.000970072	0.000708233	-0.306777	0.0340078	0.08	0.2725	1	0
ENSMUSG00000105773	4930563F08Rik	0.00101201	0.000775528	-0.210699	0.0198092	0.011	0.1475	1	0
ENSMUSG00000038126	Mphosph9	0.00108651	0.000404742	-0.213854	0.00906797	0.068	0.2555	1	0
ENSMUSG00000039275	Foxk2	0.00110923	0.000830399	-0.264208	0.0276978	0.034	0.1935	1	0
ENSMUSG00000024843	Chka	0.00111618	0.000262662	-0.32447	0.0072095	0.17	0.4035	1	0
ENSMUSG00000034612	Chst11	0.00114481	0.0010166	-0.363832	0.027573	0.193	0.426	1	0
ENSMUSG00000021270	Hsp90aa1	0.00114613	0.00100874	0.428656	0.0470194	0.375	0.1705	1	0
ENSMUSG00000027797	Dclk1	0.00116006	0.00114935	-0.363572	0.0297038	0.92	0.9375	1	0
ENSMUSG00000021838	Samd4	0.00151383	0.00182598	-0.324261	0.0456855	0.091	0.3015	1	0
ENSMUSG00000058013	Septin11	0.0015381	0.00168283	-0.287286	0.040975	0.102	0.307	1	0
ENSMUSG00000035354	Uvrag	0.00163238	0.000519634	-0.366233	0.00726081	0.159	0.3695	1	0
ENSMUSG00000031327	Chic1	0.00166462	0.00118407	-0.243057	0.0351807	0.068	0.25	1	0
ENSMUSG00000022983	Scaf4	0.00169988	0.00051861	-0.307269	0.00832772	0.114	0.301	1	0	SFARI					2	0
ENSMUSG00000029461	Fam168a	0.00172283	0.000830868	-0.386837	0.0327346	0.341	0.591	1	0
ENSMUSG00000046709	Mapk10	0.00175696	0.000123362	-0.358318	0.0070113	0.705	0.8465	1	0
ENSMUSG00000004207	Psap	0.00184498	0.000964408	0.373492	0.0547332	0.455	0.227	1	0
ENSMUSG00000025340	Rabgef1	0.00184729	0.00140652	-0.196623	0.0200034	0.011	0.1365	1	0
ENSMUSG00000032002	Dcun1d5	0.00186784	0.00136886	-0.222255	0.0282084	0.045	0.2045	1	0
ENSMUSG00000040855	Reps2	0.00194943	0.000167396	-0.361957	0.0167698	0.273	0.523	1	0
ENSMUSG00000111950	Gm48893	0.00204294	0.000666522	-0.324663	0.00775775	0.125	0.324	1	0
ENSMUSG00000024974	Smc3	0.00204376	0.00147123	-0.330294	0.032133	0.114	0.3065	1	0	SFARI					2	1
ENSMUSG00000018363	Smurf2	0.00205437	0.000150897	-0.370482	0.00710901	0.148	0.352	1	0
ENSMUSG00000021929	Kpna3	0.00208031	0.000729516	-0.249463	0.00875662	0.068	0.2445	1	0
ENSMUSG00000027210	Meis2	0.00220626	0.00231828	-0.298795	0.0531707	0.989	1	1	0	SFARI;EAGLE;TADA	0.00517313	Moderate	7.5	Discordant	1	1
ENSMUSG00000029673	Auts2	0.00221805	0.00137198	-0.316643	0.0194142	1	1	1	0	SFARI;EAGLE;TADA	0.0046251	Definitive	35.5	Concordant	1	0
ENSMUSG00000038332	Sesn1	0.00232081	0.0006763	-0.380424	0	0.216	0.4375	1	0
ENSMUSG00000028360	Slc44a5	0.00246163	0.00239508	-0.38201	0.043187	0.341	0.585	1	0
ENSMUSG00000102869	Norad	0.00246361	0.000298764	0.299579	0.0104631	0.261	0.091	1	0
ENSMUSG00000015522	Arnt	0.00252345	0.000988705	-0.304104	0.0168622	0.102	0.2785	1	0
ENSMUSG00000039278	Pcsk1n	0.00255465	0.00129167	0.599091	0.00668946	0.5	0.307	1	0
ENSMUSG00000004677	Myo9b	0.00262997	0	-0.275634	0	0.068	0.227	1	0	SFARI					2	0
ENSMUSG00000029647	Pan3	0.00271731	0.00267574	-0.352253	0.0491729	0.284	0.54	1	0
ENSMUSG00000039218	Srrm2	0.00281329	0.000289988	0.393793	0.00397716	0.864	0.7445	1	0	SFARI					2	1
ENSMUSG00000025907	Rb1cc1	0.00285941	0.00284805	-0.3148	0.0328047	0.216	0.443	1	0
ENSMUSG00000027652	Ralgapb	0.00288384	0.00369339	-0.293482	0.0782372	0.205	0.443	1	0	SFARI					1	0
ENSMUSG00000054309	Cpsf3	0.00294056	0	-0.178706	0	0.034	0.17	1	0
ENSMUSG00000035919	Bbs9	0.00298434	0.00116381	-0.316272	0.0236336	0.136	0.324	1	0
ENSMUSG00000063887	Nlgn1	0.00310694	0.00168269	-0.475312	0.00587978	0.909	0.943	1	0	SFARI					2	0
ENSMUSG00000026361	Cdc73	0.00323168	0.00270997	-0.339551	0.0285372	0.182	0.392	1	0
ENSMUSG00000022285	Ywhaz	0.00328508	0.00198706	-0.364202	0.0462278	0.261	0.4775	1	0	SFARI					3	0
ENSMUSG00000033510	Otud7a	0.00331805	0.00181802	-0.349973	0.0138797	0.591	0.7275	1	0	SFARI					2	0
ENSMUSG00000021079	Timm9	0.00332787	0.00219132	-0.228804	0.00906797	0.057	0.216	1	0
ENSMUSG00000020863	Luc7l3	0.00337343	0.00101762	-0.222386	0.00620147	0.318	0.5685	1	0
ENSMUSG00000072769	Gm10419	0.00339568	0.00203199	-0.250923	0.028339	0.159	0.3865	1	0
ENSMUSG00000028556	Dock7	0.003419	0.00174026	-0.300207	0.0123655	0.261	0.5	1	0
ENSMUSG00000031605	Klhl2	0.0034929	0.000371218	-0.336213	0.0202014	0.193	0.398	1	0
ENSMUSG00000057147	Dph6	0.00374131	0.00112368	-0.34375	0.0343514	0.193	0.3975	1	0
ENSMUSG00000042185	Nfrkb	0.00378339	0.00275576	-0.183649	0.0292883	0.034	0.1705	1	0
ENSMUSG00000039210	Gpatch2	0.00384354	0.000102909	-0.220183	0.00931641	0.057	0.205	1	0
ENSMUSG00000037343	Taf2	0.00384913	0.00245096	-0.226456	0.0174387	0.114	0.2955	1	0
ENSMUSG00000041769	Ppp2r2d	0.00395902	0.00288645	-0.178638	0.0198092	0.023	0.1475	1	0
ENSMUSG00000042670	Immp1l	0.00405164	0.00390295	-0.228142	0.0527776	0.102	0.278	1	0
ENSMUSG00000038533	Cbfa2t2	0.0040803	0.00159212	-0.272491	0.0224215	0.17	0.3805	1	0
ENSMUSG00000039153	Runx2	0.00414659	0.0046428	-0.383813	0.0596743	0.261	0.4715	1	0
ENSMUSG00000021635	Rad17	0.00416291	0.00478558	-0.21075	0.0479027	0.045	0.193	1	0
ENSMUSG00000029676	Pot1a	0.00426343	0.00165099	-0.166358	0	0.023	0.142	1	0	SFARI					2	0
ENSMUSG00000052748	Swt1	0.004275	0.00342382	-0.319135	0.015575	0.148	0.335	1	0
ENSMUSG00000021096	Ppm1a	0.00454408	0.00191465	-0.295346	0.0251899	0.114	0.2785	1	0
ENSMUSG00000041977	Arhgef11	0.00454452	0.00285868	-0.196782	0.0251899	0.125	0.3185	1	0
ENSMUSG00000038538	Ubn2	0.00456785	0.00116076	-0.280064	0.0160025	0.636	0.8185	1	0	SFARI					2	0
ENSMUSG00000038740	Mvb12b	0.00468665	0.000425862	-0.265823	0.0202014	0.25	0.4715	1	0
ENSMUSG00000055932	Fto	0.00498158	0.00331369	-0.233951	0.0355485	0.239	0.466	1	0
ENSMUSG00000061762	Tac1	0.00501583	0.000431435	0.583871	0.0143347	0.614	0.432	1	0
ENSMUSG00000047766	Lrrc49	0.0050436	0.00530841	-0.317235	0.0319819	0.307	0.5285	1	0
ENSMUSG00000006010	Odr4	0.00518647	0.00193151	-0.123615	0.0098565	0.034	0.1645	1	0
ENSMUSG00000059995	Atxn7l3	0.00525302	0	0.138976	0	0.114	0.011	1	0
ENSMUSG00000018171	Vmp1	0.00538692	0.00503781	-0.282001	0.0564648	0.125	0.3125	1	0
ENSMUSG00000030126	Tmcc1	0.00541149	0.00554593	-0.32341	0.0273268	0.545	0.7275	1	0
ENSMUSG00000032249	Anp32a	0.0056757	0.00512391	0.297759	0.0212537	0.216	0.0685	1	0	TADA	0.0293079
ENSMUSG00000061787	Rps17	0.0057573	0.0042844	0.257674	0.0113983	0.125	0.017	1	0
ENSMUSG00000039087	Rreb1	0.0058615	0.000115174	-0.192578	0.0196187	0.023	0.136	1	0
ENSMUSG00000035877	Zhx3	0.0059082	0.00394325	-0.26169	0.0260475	0.091	0.25	1	0
ENSMUSG00000046876	Atxn1	0.00599587	0.00261399	-0.318704	0.00908816	0.955	0.9375	1	0
ENSMUSG00000038910	Plcl2	0.00616521	0.00629185	-0.317471	0.0637795	0.625	0.8185	1	0
ENSMUSG00000028986	Klhl7	0.00621107	0.00704812	-0.376465	0.0508762	0.318	0.5285	1	0
ENSMUSG00000022426	Josd1	0.00626049	0.00611941	-0.171531	0.0298599	0.023	0.142	1	0
ENSMUSG00000001270	Ckb	0.00629098	0.00583409	0.454232	0.062428	0.784	0.631	1	0
ENSMUSG00000034248	Slc25a37	0.00633216	0.00465251	-0.166288	0.0202014	0.023	0.1365	1	0
ENSMUSG00000034303	Ccdc15	0.00635899	0.00461456	-0.159181	0.0101507	0.023	0.1365	1	0
ENSMUSG00000051705	Senp8	0.00644333	0.00473383	-0.151931	0.0204035	0.023	0.1365	1	0
ENSMUSG00000046169	Adamts6	0.0064958	3.57721e-05	-0.249815	0.0541794	0.057	0.193	1	0
ENSMUSG00000034066	Farp2	0.00655842	0	0.213595	0	0.193	0.057	1	0
ENSMUSG00000038383	Pigu	0.00655847	0.00450058	-0.215667	0.018892	0.057	0.1935	1	0
ENSMUSG00000106515	Gm30382	0.00657818	0.00475129	-0.206385	0.0194318	0.023	0.1365	1	0
ENSMUSG00000021460	Auh	0.00674042	0	-0.194503	0	0.068	0.216	1	0
ENSMUSG00000024534	Sncaip	0.00677501	0.00590816	-0.289576	0.0578372	0.102	0.267	1	0
ENSMUSG00000027981	Rnpc3	0.00681094	0.00405109	-0.312469	0.0264986	0.25	0.4545	1	0
ENSMUSG00000024121	Atp6v0c	0.00695374	0.00485758	0.459931	0.0731358	0.523	0.358	1	0
ENSMUSG00000062380	Tubb3	0.00698788	0.00015454	-0.211132	0.00957884	0.045	0.17	1	0
ENSMUSG00000051351	Zfp46	0.00701478	0.00519345	-0.164353	0.0400106	0.023	0.1365	1	0
ENSMUSG00000027722	Spata5	0.00703862	0.005504	-0.259551	0.00819394	0.148	0.324	1	0
ENSMUSG00000032897	Nfyc	0.00709163	0.00437591	-0.332051	0.0289421	0.182	0.3635	1	0
ENSMUSG00000029229	Chic2	0.00711385	0.00496857	-0.232944	0.046168	0.057	0.1935	1	0
ENSMUSG00000021244	Ylpm1	0.00726473	0.0072167	-0.269623	0.0374897	0.398	0.6195	1	0
ENSMUSG00000030614	Tmem126b	0.00732728	0.00293346	-0.138976	0	0.011	0.108	1	0
ENSMUSG00000038861	Pi4kb	0.00738852	0	-0.220266	0	0.08	0.227	1	0
ENSMUSG00000061859	Patj	0.00745354	0.00272421	-0.302139	0.0160655	0.159	0.324	1	0	SFARI					2	0
ENSMUSG00000039599	Fam149b	0.00764463	0.00669282	-0.10521	0.0287382	0.057	0.21	1	0
ENSMUSG00000021983	Atp8a2	0.0076998	0.00311123	-0.317038	0.0204717	0.25	0.4375	1	0
ENSMUSG00000049090	Zadh2	0.00774835	0.00460676	-0.209453	0	0.08	0.2275	1	0
ENSMUSG00000022246	Rai14	0.00786566	0.00294524	-0.140304	0.00995266	0.034	0.1535	1	0
ENSMUSG00000032373	Car12	0.00786566	0.00294524	-0.108508	0.0098565	0.034	0.1535	1	0
ENSMUSG00000068798	Rap1a	0.0080241	0.00538152	-0.173267	0.0192485	0.057	0.1935	1	0
ENSMUSG00000020993	Trappc6b	0.00808319	0.00261769	-0.182678	0.00898807	0.08	0.233	1	0	SFARI						1
ENSMUSG00000010554	Mettl16	0.00810368	0.00563549	-0.217842	0.0190686	0.045	0.1705	1	0
ENSMUSG00000040265	Dnm3	0.00820316	0.000321699	-0.332414	0.0107667	0.773	0.932	1	0
ENSMUSG00000098274	Rpl24	0.00820356	0.00497925	0.212242	0.0111492	0.159	0.0395	1	0
ENSMUSG00000051329	Nup160	0.00824896	0.00304209	-0.183161	0.0187187	0.068	0.2105	1	0
ENSMUSG00000024498	Tcerg1	0.00828781	0.00220636	-0.234465	0	0.125	0.2895	1	0
ENSMUSG00000005625	Psmd4	0.00829378	0.00916591	-0.211266	0.0371001	0.045	0.182	1	0
ENSMUSG00000097375	6720427I07Rik	0.00850864	0.00586465	-0.24618	0.0274494	0.068	0.2045	1	0
ENSMUSG00000040591	1110051M20Rik	0.00852518	0.0082307	-0.233588	0.0416441	0.239	0.4545	1	0
ENSMUSG00000055407	Map6	0.00853689	0.00808605	-0.219758	0.0541794	0.091	0.244	1	0
ENSMUSG00000031963	Bmper	0.00855959	0.00834489	-0.219869	0.0385004	0.034	0.153	1	0
ENSMUSG00000029817	Tra2a	0.00858595	0.00610311	-0.242284	0.0210345	0.216	0.415	1	0
ENSMUSG00000027810	Eif2a	0.00860971	0	-0.168271	0	0.08	0.227	1	0
ENSMUSG00000031012	Cask	0.00866545	0.00056746	-0.262066	0.0191881	0.284	0.523	1	0	SFARI					1	0
ENSMUSG00000032096	Arcn1	0.00873573	0.00305806	-0.137487	0.00976217	0.045	0.176	1	0
ENSMUSG00000027508	Pag1	0.00877772	0.00744102	-0.263884	0.0396992	0.125	0.301	1	0
ENSMUSG00000029290	Zfp326	0.00882588	0.000641419	-0.23471	0.0262711	0.091	0.239	1	0
ENSMUSG00000020300	Cpeb4	0.00885924	0.00280604	-0.252658	0.00668946	0.25	0.466	1	0	SFARI					2	0
ENSMUSG00000046982	Tshz1	0.00890751	0.00169748	-0.353867	0.0132488	0.67	0.8695	1	0	TADA	0.0023426
ENSMUSG00000024483	Ankhd1	0.00911889	0.00101077	-0.350281	0	0.307	0.4945	1	0
ENSMUSG00000005779	Psmb4	0.00912218	0	0.196692	0	0.102	0.011	1	0
ENSMUSG00000014592	Camta1	0.00923499	0.00641789	-0.194137	0.04596	0.42	0.7275	1	0
ENSMUSG00000037253	Mex3c	0.00931075	0	-0.190684	0	0.034	0.148	1	0
ENSMUSG00000026657	Frmd4a	0.00933835	0.00286778	-0.361175	0.0448865	0.739	0.7955	1	0
ENSMUSG00000066829	Zfp810	0.00935553	6.50872e-05	-0.1463	0.0103568	0.011	0.102	1	0
ENSMUSG00000064061	Dzip3	0.00937491	0.00263162	-0.253119	0	0.341	0.574	1	0
ENSMUSG00000034673	Pbx2	0.00940155	0	0.138976	0	0.102	0.011	1	0
ENSMUSG00000047514	Tspyl1	0.00940155	0	0.138976	0	0.102	0.011	1	0
ENSMUSG00000057457	Phex	0.00949198	0	-0.124179	0	0.011	0.102	1	0
ENSMUSG00000024404	Riok3	0.0095763	0.00244111	-0.242643	0.00853678	0.102	0.2555	1	0
ENSMUSG00000038205	Prkab2	0.00962198	0	-0.166358	0	0.023	0.125	1	0
ENSMUSG00000025337	Sbds	0.00963323	0.00947329	-0.187473	0.0298599	0.023	0.131	1	0
ENSMUSG00000022897	Dyrk1a	0.00964503	0.005809	-0.308422	0.0436824	0.307	0.4945	1	0	SFARI;EAGLE;TADA	1.78e-13	Definitive	20.2	Concordant	1	1
ENSMUSG00000020647	Ncoa1	0.00970229	0.00381925	-0.197143	0.0226707	0.386	0.6195	1	0	SFARI;EAGLE		Limited	3	Discordant	1	0
ENSMUSG00000041777	Cir1	0.00970398	0.0033716	-0.190684	0	0.045	0.1645	1	0
ENSMUSG00000032449	Slc25a36	0.0100514	0.0099874	-0.208417	0.0416441	0.125	0.307	1	0
ENSMUSG00000048410	Zfp407	0.0101182	0.00705997	-0.324117	0.067194	0.489	0.7275	1	0
ENSMUSG00000042303	Sgsm3	0.0102222	0.008825	-0.171413	0.0274494	0.091	0.244	1	0	SFARI					2	0
ENSMUSG00000015889	Lta4h	0.0105727	0.00706045	-0.159591	0.0194318	0.045	0.1705	1	0
ENSMUSG00000024201	Kdm4b	0.0107241	0.00927692	0.302535	0.0317167	0.227	0.091	1	0	SFARI					2	0
ENSMUSG00000009647	Mcu	0.0107896	0.0021724	-0.282255	0.00710901	0.205	0.392	1	0
ENSMUSG00000027651	Rprd1b	0.010796	0.011423	-0.188812	0.035798	0.08	0.2275	1	0
ENSMUSG00000058240	Cryzl1	0.0109361	0	-0.200299	0	0.057	0.182	1	0
ENSMUSG00000043542	Zc2hc1a	0.0109561	0.00421659	-0.181795	0.0290107	0.045	0.1645	1	0
ENSMUSG00000040794	C1qtnf4	0.010996	0.0117969	0.346103	0.0787867	0.545	0.369	1	0
ENSMUSG00000030257	Srgap3	0.0110743	0.00832945	-0.27878	0.033634	0.307	0.506	1	0	SFARI					2	0
ENSMUSG00000005533	Igf1r	0.0112324	0.00357955	-0.341658	0.0138797	0.205	0.392	1	0
ENSMUSG00000026349	Ccnt2	0.0112573	0.00832404	-0.314346	0.0142679	0.193	0.369	1	0
ENSMUSG00000020390	Ube2b	0.0112684	0.00524363	-0.334046	0.0113983	0.364	0.5565	1	0
ENSMUSG00000039449	Prpf18	0.0112756	0.0120848	-0.213512	0.045347	0.08	0.2275	1	0
ENSMUSG00000022024	Sugt1	0.011368	0.00826092	-0.13743	0.0206096	0.023	0.125	1	0
ENSMUSG00000054162	Spock3	0.0114503	0.0102001	-0.382611	0.0438164	0.761	0.8525	1	0
ENSMUSG00000029822	Osbpl3	0.0115183	0.00848969	-0.316757	0.00731286	0.159	0.324	1	0
ENSMUSG00000022679	Mpv17l	0.0115236	0.00393013	-0.19168	0.00940227	0.068	0.199	1	0
ENSMUSG00000039601	Rcan2	0.0115884	0.00180641	-0.298067	0.00906797	0.455	0.665	1	0
ENSMUSG00000024104	Washc2	0.0115952	0.00455199	-0.178638	0.0198092	0.034	0.142	1	0
ENSMUSG00000074829	2010315B03Rik	0.0116669	0.00441232	-0.147274	0.0198092	0.045	0.1645	1	0
ENSMUSG00000020790	Ankfy1	0.0116771	0.00395066	-0.244188	0.016724	0.114	0.267	1	0
ENSMUSG00000014850	Msh3	0.0117406	0.00428805	-0.260473	0.017742	0.08	0.2105	1	0
ENSMUSG00000028809	Srrm1	0.0118033	0.00601281	-0.181487	0.00651849	0.295	0.528	1	0
ENSMUSG00000031701	Dnaja2	0.0119508	0.00734514	-0.238202	0.0251899	0.136	0.2955	1	0
ENSMUSG00000073565	Prr16	0.0120344	0	-0.366128	0	0.216	0.386	1	0
ENSMUSG00000016386	Mpped2	0.0120353	0.0097648	-0.18823	0.0409019	0.455	0.693	1	0
ENSMUSG00000015656	Hspa8	0.0120461	0.0146768	0.443091	0.0850609	0.409	0.233	1	0
ENSMUSG00000024560	Cxxc1	0.0120922	0.0161834	0.216827	0.0341978	0.125	0.017	1	0
ENSMUSG00000039968	Rsbn1l	0.0121283	0.000514946	-0.137492	0.00806439	0.182	0.375	1	0
ENSMUSG00000001674	Ddx18	0.0122956	0.00410784	-0.200973	0.00914929	0.068	0.199	1	0
ENSMUSG00000037315	Jade3	0.0123618	0.000397565	-0.187975	0.00923209	0.08	0.216	1	0
ENSMUSG00000005886	Ncoa2	0.0123885	0.00353928	-0.356555	0.0161503	0.386	0.574	1	0
ENSMUSG00000055866	Per2	0.0124684	0.00437941	-0.152754	0.00976217	0.045	0.1645	1	0	SFARI;EAGLE		Moderate	6.75	Concordant	2	0
ENSMUSG00000105736	Gm42456	0.0124745	0.00380403	-0.166765	0.00890957	0.102	0.2555	1	0
ENSMUSG00000026110	Mgat4a	0.0125699	0	-0.16665	0	0.068	0.205	1	0
ENSMUSG00000117450	4933424G05Rik	0.0125881	0.0075538	-0.200313	0.0256115	0.114	0.2725	1	0
ENSMUSG00000029207	Apbb2	0.0126735	0.00440444	-0.238562	0.00758471	0.205	0.3865	1	0
ENSMUSG00000021700	Rab3c	0.0128657	0.0073336	-0.396331	0.0568326	0.352	0.5455	1	0
ENSMUSG00000019927	Ube2d1	0.0128719	0.00805113	-0.22021	0.0262711	0.102	0.25	1	0
ENSMUSG00000020883	Fbxl20	0.0129709	0.000912385	-0.20501	0.0245829	0.17	0.341	1	0
ENSMUSG00000038848	Ythdf1	0.0130385	0.00507001	-0.159181	0.0101507	0.023	0.1195	1	0
ENSMUSG00000026223	Itm2c	0.0130456	0.0106427	0.473287	0.0555315	0.511	0.369	1	0
ENSMUSG00000040029	Ipo8	0.0131179	0.000325846	-0.151227	0.00966964	0.057	0.182	1	0
ENSMUSG00000069089	Cdk7	0.0131623	0.00433469	-0.215729	0	0.057	0.176	1	0
ENSMUSG00000030020	Prickle2	0.0132622	0.00439835	-0.248994	0.0269656	0.534	0.716	1	0	SFARI					2	0
ENSMUSG00000023830	Igf2r	0.013269	0.00515769	-0.144753	0.0102527	0.023	0.1195	1	0
ENSMUSG00000038299	Wdr36	0.013269	0.00515769	-0.144753	0.0102527	0.023	0.1195	1	0
ENSMUSG00000027822	Slc33a1	0.0133483	0	-0.14439	0	0.057	0.182	1	0
ENSMUSG00000024283	Wac	0.0134133	0.010366	-0.270972	0.0317826	0.284	0.4775	1	0	SFARI;EAGLE;TADA	3.92e-06	Definitive	15	Concordant	1	1
ENSMUSG00000043991	Pura	0.0134187	0.00347319	-0.262006	0.0072095	0.182	0.358	1	0
ENSMUSG00000051586	Mical3	0.013443	0.00484201	-0.280526	0.0269182	0.432	0.636	1	0
ENSMUSG00000090223	Pcp4	0.0134947	0.00458069	0.495667	0.0078172	0.443	0.3185	1	0
ENSMUSG00000097589	Dleu2	0.0136449	0.000541776	-0.307383	0.0405407	0.216	0.392	1	0
ENSMUSG00000028152	Tspan5	0.0136504	0.00734093	-0.320302	0.0218454	0.545	0.676	1	0
ENSMUSG00000024558	Mapk4	0.0137139	0.00281231	-0.326777	0.0137859	0.17	0.3355	1	0
ENSMUSG00000043987	Cep164	0.0139822	0.00504823	-0.181924	0.00966964	0.034	0.142	1	0
ENSMUSG00000041058	Wwp1	0.0139886	0.00749716	-0.310557	0.00806439	0.136	0.284	1	0	SFARI					3	0
ENSMUSG00000030744	Rps3	0.0140546	0.0176964	0.231667	0.0443609	0.159	0.04	1	0
ENSMUSG00000021615	Xrcc4	0.0140556	0.0158583	-0.194158	0.0703823	0.159	0.3465	1	0
ENSMUSG00000020255	Nopchap1	0.014101	0.00052687	-0.19688	0.00839626	0.114	0.261	1	0
ENSMUSG00000090841	Myl6	0.014178	0.00562322	0.225393	0.0098565	0.25	0.108	1	0
ENSMUSG00000040433	Zbtb38	0.0141894	0.0137134	-0.190746	0.0337267	0.136	0.307	1	0
ENSMUSG00000039652	Cpeb3	0.0143383	0.0183619	-0.343828	0.0868728	0.341	0.574	1	0
ENSMUSG00000042506	Usp22	0.014385	0.00926572	-0.158001	0.0192485	0.057	0.1815	1	0
ENSMUSG00000024222	Fkbp5	0.0144134	0.00837358	-0.22438	0.0172909	0.114	0.2615	1	0
ENSMUSG00000101930	Gm5441	0.0144178	0.00506478	-0.154311	0.0098565	0.057	0.176	1	0
ENSMUSG00000031960	Aars	0.0144603	0	-0.192645	0	0.034	0.136	1	0
ENSMUSG00000049086	Bmyc	0.0145941	0.00718612	0.232194	0.0107952	0.182	0.0625	1	0
ENSMUSG00000069045	Ddx3y	0.0145995	0.00901554	-0.16659	0.0185485	0.08	0.216	1	0
ENSMUSG00000049624	Slc17a5	0.0146368	0.000250539	-0.171668	0.00995266	0.034	0.136	1	0
ENSMUSG00000023826	Prkn	0.0147059	0.0167695	0.250089	0.0748081	0.773	0.6025	1	0	SFARI					2	0
ENSMUSG00000037470	Uggt1	0.0147114	0.00820769	-0.218374	0.0168622	0.136	0.2955	1	0
ENSMUSG00000044471	Lncpint	0.0150579	0.0079402	-0.256215	0.0107102	0.898	0.9375	1	0
ENSMUSG00000039166	Akap7	0.0150961	0.00520064	-0.166494	0.00966964	0.057	0.176	1	0
ENSMUSG00000035849	Krt222	0.0153537	0.000256402	-0.143239	0.0101507	0.034	0.136	1	0
ENSMUSG00000055053	Nfic	0.0154421	0.0177646	-0.194375	0.039622	0.023	0.125	1	0
ENSMUSG00000022995	Enah	0.0155783	0.00490026	-0.298517	0.0477345	0.295	0.483	1	0
ENSMUSG00000040565	Btaf1	0.0157113	0.00866805	-0.21734	0.0211435	0.398	0.625	1	0	SFARI					2	0
ENSMUSG00000054302	Eapp	0.0158074	0.0176889	-0.148586	0.0400106	0.034	0.1475	1	0
ENSMUSG00000024622	Hmgxb3	0.0159346	0.0166707	-0.179472	0.0367658	0.068	0.2045	1	0
ENSMUSG00000030061	Uba3	0.0159841	0.00516942	-0.134781	0.00957884	0.068	0.199	1	0
ENSMUSG00000074165	Zfp788	0.0162435	0.0111257	-0.185675	0.0098565	0.034	0.1365	1	0
ENSMUSG00000050783	Htr1f	0.0163641	0.00444528	-0.578043	0.143245	0.239	0.386	1	0
ENSMUSG00000070822	Zscan18	0.0163752	0.00609968	-0.0828744	0.0103568	0.023	0.1195	1	0
ENSMUSG00000106379	Lhfpl3	0.0164121	0.0174937	-0.231547	0.0623497	0.523	0.784	1	0
ENSMUSG00000034118	Tpst1	0.0164431	0.0104092	-0.22437	0.0267301	0.102	0.2385	1	0
ENSMUSG00000062901	Klhl24	0.0164716	0.00529049	-0.171529	0.00914929	0.08	0.2105	1	0
ENSMUSG00000048701	Ccdc6	0.0165576	0.00519033	-0.158065	0	0.057	0.176	1	0
ENSMUSG00000034724	Cnot6l	0.016627	0.00296805	-0.274175	0	0.25	0.426	1	0
ENSMUSG00000032985	5730522E02Rik	0.016757	0.000616483	-0.337979	0.0226987	0.841	0.83	1	0
ENSMUSG00000093387	Gm20732	0.0167785	0	-0.177998	0	0.091	0.227	1	0
ENSMUSG00000028278	Rragd	0.0168976	0.0052952	-0.158065	0	0.057	0.176	1	0
ENSMUSG00000029911	Ssbp1	0.0170569	0	-0.137504	0	0.091	0.227	1	0
ENSMUSG00000029121	Crmp1	0.0170734	0.0101304	-0.202127	0.0258277	0.102	0.25	1	0
ENSMUSG00000039546	Ajap1	0.0171254	0	-0.206451	0	0.023	0.114	1	0
ENSMUSG00000019647	Sema6a	0.017214	0	-0.212153	0	0.091	0.227	1	0
ENSMUSG00000020456	Ogdh	0.0173201	0.0170907	-0.218437	0.0574879	0.216	0.409	1	0
ENSMUSG00000025173	Wdr45b	0.0174014	0.000845379	-0.168052	0.0292883	0.057	0.17	1	0
ENSMUSG00000045095	Magi1	0.0175597	0.00759719	-0.330148	0.0234525	0.455	0.659	1	0
ENSMUSG00000032020	Ubash3b	0.0176291	0.00436255	-0.23348	0.0078172	0.148	0.301	1	0
ENSMUSG00000093528	Nrg3os	0.0176648	0.00850481	-0.186732	0.0145737	0.216	0.3975	1	0
ENSMUSG00000052373	Mpp3	0.0177472	0.0123532	-0.135989	0.0204035	0.034	0.1365	1	0
ENSMUSG00000042308	Setd1a	0.0177503	0.0114952	0.144032	0.0112724	0.125	0.0285	1	0	SFARI;EAGLE;TADA	0.0133752	Limited	4.35	Discordant	1	0
ENSMUSG00000041817	Fam169a	0.017839	0.0115351	-0.497098	0.022587	0.091	0.216	1	0
ENSMUSG00000068036	Afdn	0.0178581	0.0113688	-0.278627	0.0411639	0.33	0.5115	1	0
ENSMUSG00000032839	Trpc1	0.0179676	0.00214465	-0.293479	0.0220977	0.205	0.358	1	0
ENSMUSG00000002459	Rgs20	0.0179869	0.0192518	-0.311327	0.0504766	0.216	0.3805	1	0
ENSMUSG00000023034	Nr4a1	0.0182282	0.0141221	0.307054	0.0210345	0.216	0.091	1	0
ENSMUSG00000002968	Med25	0.0182872	0.000294382	-0.22034	0.0170027	0.125	0.273	1	0
ENSMUSG00000068696	Gpr88	0.018398	0.00258777	0.443334	0.00673362	0.557	0.426	1	0
ENSMUSG00000022337	Emc2	0.0184379	0.0100696	-0.257287	0.00812864	0.159	0.3065	1	0
ENSMUSG00000032637	Atxn2l	0.0185317	0.00989629	-0.187579	0.016588	0.148	0.3065	1	0
ENSMUSG00000060212	Pcnx2	0.0186818	0.00443775	-0.180171	0.00826028	0.148	0.3125	1	0
ENSMUSG00000020668	Kif3c	0.0187224	0	-0.137504	0	0.091	0.227	1	0
ENSMUSG00000043384	Gprasp1	0.0188088	0.0178964	0.343064	0.0450608	0.602	0.489	1	0
ENSMUSG00000026662	Sephs1	0.0191124	0.00707251	-0.213288	0.00966964	0.034	0.1305	1	0
ENSMUSG00000020719	Ddx5	0.0191927	0.00599008	0.267298	0.0153793	0.966	0.9375	1	0
ENSMUSG00000031715	Smarca5	0.019238	0.0213414	-0.419615	0.0494282	0.17	0.3235	1	0
ENSMUSG00000030411	Nova2	0.0193105	0.0200972	-0.185827	0.0457538	0.08	0.216	1	0	SFARI						1
ENSMUSG00000020952	Scfd1	0.0193446	0.016538	-0.217979	0.0434167	0.102	0.244	1	0
ENSMUSG00000071644	Eef1g	0.0193733	0.0103022	0.19656	0.0110286	0.159	0.051	1	0
ENSMUSG00000014426	Map3k4	0.0195082	0.0123967	-0.294701	0.0342936	0.102	0.2275	1	0
ENSMUSG00000036918	Ttc7	0.0195383	0.0133435	-0.120222	0.0204035	0.034	0.1365	1	0
ENSMUSG00000024169	Ift140	0.0195606	0.0140554	-0.13743	0.0206096	0.023	0.1135	1	0
ENSMUSG00000035725	Prkx	0.0195606	0.0140554	-0.13743	0.0206096	0.023	0.1135	1	0
ENSMUSG00000031529	Tnks	0.0196396	0.0165803	-0.19261	0.0141688	0.261	0.4545	1	0
ENSMUSG00000050856	Atp5k	0.0197429	0.0177422	0.265672	0.0217059	0.17	0.0565	1	0
ENSMUSG00000106847	Peg13	0.0197469	0.0145026	0.11612	0.0113983	0.102	0.017	1	0
ENSMUSG00000022498	Txndc11	0.0197673	0.00445503	-0.222392	0	0.159	0.3125	1	0
ENSMUSG00000022419	Deptor	0.0197757	0.00334113	-0.201	0.016588	0.136	0.2895	1	0
ENSMUSG00000051285	Pcmtd1	0.0198094	0.00640515	-0.23173	0	0.295	0.4885	1	0
ENSMUSG00000032355	Mlip	0.0198133	0	-0.278301	0	0.045	0.148	1	0
ENSMUSG00000059586	Nsmce2	0.0199218	0.0216491	-0.269104	0.045347	0.193	0.358	1	0
ENSMUSG00000039697	Ncoa7	0.0200341	0.00558031	-0.251507	0.0136021	0.261	0.4435	1	0
ENSMUSG00000035735	Dagla	0.0200874	0.0129419	-0.186815	0.0190686	0.057	0.1705	1	0	SFARI					2	0
ENSMUSG00000041258	Zfp236	0.0201613	0.0121117	-0.28494	0.024387	0.159	0.2955	1	0
ENSMUSG00000025616	Usp16	0.0201737	0.00614827	-0.244874	0.00860882	0.102	0.233	1	0
ENSMUSG00000021087	Rtn1	0.0201907	0.0065518	0.35745	0	0.943	0.886	1	0
ENSMUSG00000006678	Pola1	0.0202559	0.00478061	-0.199309	0	0.136	0.2895	1	0
ENSMUSG00000038267	Slc22a23	0.0205296	0.00618821	-0.197887	0.0174387	0.125	0.267	1	0
ENSMUSG00000022340	Sybu	0.0205923	0.00847536	-0.24179	0.0125945	0.261	0.4545	1	0	SFARI					3	0
ENSMUSG00000061298	Agbl4	0.0208361	0.000553168	-0.345291	0.0027313	0.773	0.824	1	0	SFARI					2	0
ENSMUSG00000021290	Atp5mpl	0.0209666	0.0148031	-0.135989	0.0204035	0.023	0.1135	1	0
ENSMUSG00000059708	Akap17b	0.0211589	0.000659199	-0.173178	0.00923209	0.08	0.205	1	0
ENSMUSG00000108532	Gm32647	0.0211842	0.00808773	0.596661	0.00995266	0.216	0.0965	1	0
ENSMUSG00000021268	Meg3	0.0212573	0.00394296	0.190463	0.00385978	1	1	1	0
ENSMUSG00000042082	Arsb	0.0213088	0.0209819	-0.20933	0.0672863	0.182	0.375	1	0
ENSMUSG00000035202	Lars2	0.0213851	0.00515615	0.496431	0.0270251	0.568	0.4435	1	0
ENSMUSG00000039474	Wfs1	0.0213902	0.00960821	0.167572	0.0100507	0.193	0.074	1	0
ENSMUSG00000033720	Sfxn5	0.0215562	0.0233366	-0.184475	0.056689	0.068	0.193	1	0
ENSMUSG00000048249	Crebrf	0.0215729	0.00689705	-0.281534	0.0144703	0.25	0.392	1	0
ENSMUSG00000000861	Bcl11a	0.0217061	0.0106378	-0.230364	0.0194318	0.466	0.676	1	0	SFARI;EAGLE;TADA	0.00044409	Moderate	9.15	Discordant	1	1
ENSMUSG00000028249	Sdcbp	0.0217759	0.00663509	-0.132179	0.00940227	0.08	0.2105	1	0
ENSMUSG00000098145	Gm26936	0.0218399	0.00766274	-0.147342	0	0.034	0.1305	1	0
ENSMUSG00000025060	Slk	0.0224327	0.0138309	-0.36047	0.0317826	0.295	0.4545	1	0
ENSMUSG00000034858	Fam214a	0.0225423	0.006994	-0.185779	0.0224215	0.193	0.3695	1	0
ENSMUSG00000026447	Pik3c2b	0.0226189	0.0185115	-0.243337	0.0406484	0.148	0.301	1	0
ENSMUSG00000039031	Arhgap18	0.0227581	0.00831278	-0.147522	0.0141688	0.216	0.409	1	0
ENSMUSG00000037110	Ralgapa2	0.0227703	0.0127432	-0.278784	0.00651849	0.261	0.4375	1	0
ENSMUSG00000118202	C030017B01Rik	0.0230878	0.00832383	-0.113044	0.0102527	0.034	0.1305	1	0
ENSMUSG00000097267	1700109K24Rik	0.0231651	0.0064472	-0.136204	0	0.091	0.2215	1	0
ENSMUSG00000024127	Prepl	0.0232311	0.00219321	-0.172431	0.0143684	0.239	0.426	1	0
ENSMUSG00000022141	Nipbl	0.0233563	0.00203574	-0.164641	0.0244649	0.511	0.7215	1	0	SFARI					1	1
ENSMUSG00000039478	Micu3	0.0233621	0.00574482	-0.172724	0.00793887	0.182	0.358	1	0
ENSMUSG00000028218	Cibar1	0.0234868	0.00696058	-0.195334	0.00890957	0.102	0.233	1	0
ENSMUSG00000020903	Stx8	0.023558	0.00649307	-0.200973	0.00914929	0.08	0.199	1	0
ENSMUSG00000006058	Snf8	0.0236055	0.00904563	-0.115458	0.0104631	0.023	0.108	1	0
ENSMUSG00000025505	Tmem80	0.0236055	0.00904563	-0.115458	0.0104631	0.023	0.108	1	0
ENSMUSG00000034333	Zbed4	0.0236055	0.00904563	-0.115458	0.0104631	0.023	0.108	1	0
ENSMUSG00000029125	Stx18	0.0239989	0.0143844	-0.141491	0.0190686	0.08	0.2045	1	0
ENSMUSG00000027035	Cers6	0.0240749	0.00904245	-0.411019	0.00568324	0.261	0.409	1	0
ENSMUSG00000025332	Kdm5c	0.0241277	0.00486253	-0.212101	0.0174387	0.114	0.2445	1	0	SFARI					1	0
ENSMUSG00000020982	Nemf	0.0241713	0.0184379	-0.23164	0.031882	0.17	0.324	1	0
ENSMUSG00000048758	Rpl29	0.0243024	0.0149039	0.190769	0.0221778	0.136	0.0395	1	0
ENSMUSG00000039828	Wdr70	0.0244775	0.00786109	-0.171427	0.017589	0.125	0.267	1	0
ENSMUSG00000039242	B3galnt2	0.0245112	0.0156856	-0.181924	0.00966964	0.045	0.1475	1	0
ENSMUSG00000057375	Yipf1	0.0246093	0.00825307	-0.152754	0.00976217	0.057	0.1645	1	0
ENSMUSG00000061576	Dpp6	0.0250552	0.015574	-0.333539	0.0250921	0.966	0.977	1	0	SFARI					2	0
ENSMUSG00000034154	Ino80	0.0250723	0.0120182	-0.218795	0.0151135	0.193	0.3525	1	0
ENSMUSG00000041245	Wnk3	0.0252547	0.00655514	-0.176323	0	0.102	0.233	1	0	SFARI					2	0
ENSMUSG00000069662	Marcks	0.0252837	0.0242678	0.260646	0.0327346	0.148	0.0455	1	0
ENSMUSG00000025579	Gaa	0.0252981	0.00202731	0.274733	0.00995266	0.25	0.125	1	0
ENSMUSG00000021846	Peli2	0.0254027	0.0236579	-0.275837	0.046378	0.159	0.307	1	0
ENSMUSG00000006673	Qrich1	0.0254696	0.0115295	-0.218974	0.0143684	0.239	0.409	1	0	SFARI;TADA	0.00071082				2	0
ENSMUSG00000020015	Cdk17	0.0255387	0.0281959	-0.352165	0.101318	0.682	0.7725	1	0
ENSMUSG00000042851	Zc3h6	0.025668	0.0275905	-0.214527	0.040327	0.159	0.3125	1	0
ENSMUSG00000101609	Kcnq1ot1	0.0256732	0.0137185	-0.268801	0.0277606	0.239	0.3975	1	0
ENSMUSG00000049327	Kmt5a	0.0257012	0.00964523	-0.0837494	0.0104631	0.023	0.108	1	0
ENSMUSG00000060261	Gtf2i	0.0257757	0.00145335	-0.199114	0.00710901	0.25	0.42	1	0	SFARI					2	0
ENSMUSG00000019775	Rgs17	0.0258778	0.0180847	-0.291824	0.045347	0.364	0.551	1	0
ENSMUSG00000025981	Coq10b	0.0262671	0.0290973	-0.13164	0.039622	0.034	0.1365	1	0
ENSMUSG00000025314	Ptprj	0.0263402	0.00717858	-0.112975	0.0139747	0.273	0.483	1	0
ENSMUSG00000029234	Tmem165	0.0264433	0.0236208	-0.181795	0.0290107	0.057	0.165	1	0
ENSMUSG00000030751	Psma1	0.0265236	0	-0.189034	0	0.091	0.216	1	0
ENSMUSG00000041992	Rapgef5	0.026593	0.019019	-0.286344	0.0234525	0.136	0.278	1	0
ENSMUSG00000021182	Ccdc88c	0.0266966	0.00739651	-0.181447	0	0.091	0.2105	1	0	SFARI					2	0
ENSMUSG00000049232	Tigd2	0.0268075	0.0251664	-0.128666	0.0307603	0.034	0.131	1	0
ENSMUSG00000032192	Gnb5	0.026881	0.0137512	-0.184339	0.0222585	0.227	0.3975	1	0
ENSMUSG00000075590	Nrbp2	0.0269106	0.0252148	-0.176611	0.039241	0.034	0.131	1	0
ENSMUSG00000038736	Nudcd1	0.0269344	0.00887789	-0.180105	0.00957884	0.068	0.176	1	0
ENSMUSG00000038879	Nipal2	0.0269427	0.0236073	-0.174498	0.0465898	0.068	0.1875	1	0
ENSMUSG00000034813	Grip1	0.0270268	0.0105995	-0.227715	0.0229254	0.92	0.9375	1	0	SFARI					2	0
ENSMUSG00000025917	Cops5	0.0270452	0.0302035	-0.115108	0.046168	0.08	0.2215	1	0
ENSMUSG00000031660	Brd7	0.0270795	0	-0.128008	0	0.068	0.182	1	0
ENSMUSG00000039285	Azi2	0.0272179	0.00844401	-0.118821	0.00948974	0.08	0.199	1	0
ENSMUSG00000085222	Gm13974	0.0272345	0.0305612	-0.262395	0.0607405	0.273	0.466	1	0
ENSMUSG00000048756	Foxo3	0.027284	0.0270807	-0.193919	0.0514465	0.136	0.284	1	0
ENSMUSG00000066392	Nrxn3	0.0272916	0.00667093	-0.123704	0.00377039	1	1	1	0	SFARI;EAGLE		Moderate	11.1	Discordant	1	0
ENSMUSG00000026834	Acvr1c	0.0274231	0.018195	-0.157808	0.0385004	0.045	0.1475	1	0
ENSMUSG00000031167	Rbm3	0.0275127	0.0290614	-0.151098	0.0290107	0.057	0.1705	1	0
ENSMUSG00000039159	Ube2h	0.0275537	0.0165209	-0.203073	0.0406484	0.148	0.2955	1	0	SFARI					2	0
ENSMUSG00000036019	Tmtc2	0.0279241	0.0228957	-0.237038	0.0649071	0.193	0.358	1	0
ENSMUSG00000027284	Cdan1	0.0280036	0	0.166358	0	0.102	0.023	1	0
ENSMUSG00000017400	Stac2	0.0280281	0	-0.196397	0	0.08	0.193	1	0
ENSMUSG00000036411	9530077C05Rik	0.0280755	0.018029	-0.145784	0.0196187	0.045	0.1475	1	0
ENSMUSG00000020576	Nbas	0.0282508	0.0151233	-0.174075	0.0240044	0.193	0.3525	1	0
ENSMUSG00000030760	Acer3	0.0283444	0.00117953	-0.160409	0.0178976	0.091	0.216	1	0
ENSMUSG00000004865	Srpk1	0.0284919	0.0102564	-0.23609	0.0249843	0.136	0.267	1	0
ENSMUSG00000106218	Gm43713	0.0285029	0.00188746	-0.163441	0.0182173	0.091	0.216	1	0
ENSMUSG00000047767	Atg16l2	0.0285358	0.010341	-0.209723	0.0267301	0.102	0.2215	1	0
ENSMUSG00000056536	Pign	0.0287285	0.0196778	-0.164561	0.0200034	0.034	0.125	1	0
ENSMUSG00000026864	Hspa5	0.0287512	0.0118414	0.249424	0.0192485	0.25	0.1195	1	0
ENSMUSG00000034480	Diaph2	0.0288375	0.00146545	-0.28662	0.0155354	0.818	0.9035	1	0
ENSMUSG00000019039	Dalrd3	0.0289965	0.0110873	0.383401	0.0204717	0.511	0.4035	1	0
ENSMUSG00000022905	Kpna1	0.0290346	0.019044	-0.247632	0.0413068	0.159	0.2955	1	0
ENSMUSG00000021939	Ctsb	0.0290618	0.0181984	0.256082	0.0198092	0.273	0.1475	1	0
ENSMUSG00000078247	Airn	0.0290619	0.00952435	-0.152754	0.00976217	0.068	0.176	1	0
ENSMUSG00000001855	Nup214	0.0295335	0.00963861	-0.150501	0.0183814	0.114	0.2445	1	0
ENSMUSG00000043671	Dpy19l3	0.0296863	0.0190345	-0.175021	0.0194318	0.057	0.159	1	0
ENSMUSG00000016427	Ndufa1	0.0296968	0.00169246	0.144032	0.0112724	0.102	0.023	1	0
ENSMUSG00000030432	Rpl28	0.0299005	0.0244834	0.19272	0.0208199	0.182	0.0685	1	0
ENSMUSG00000075702	Selenom	0.0299111	0.0262718	-0.182979	0.0374405	0.057	0.165	1	0
ENSMUSG00000034145	Tmem63c	0.0299431	0.000709917	-0.152754	0.00976217	0.057	0.159	1	0
ENSMUSG00000097545	Mir124a-1hg	0.0299563	0.0189775	0.258677	0.0337666	0.727	0.659	1	0
ENSMUSG00000036273	Lrrk2	0.0299641	0.0257875	-0.317055	0.0476046	0.636	0.7615	1	0
ENSMUSG00000037434	Slc30a1	0.0300018	0	0.10806	0	0.102	0.023	1	0
ENSMUSG00000025085	Ablim1	0.0300033	0.0116008	-0.276004	0.0263276	0.295	0.449	1	0
ENSMUSG00000037458	Azin1	0.0300578	0.000892346	-0.149731	0.00957884	0.08	0.193	1	0
ENSMUSG00000020196	Cabin1	0.0303474	0	-0.169925	0	0.125	0.261	1	0
ENSMUSG00000071252	2210408I21Rik	0.0304765	0.0106567	-0.24478	0.0117937	0.352	0.5225	1	0
ENSMUSG00000031673	Cdh11	0.0305922	0.0134688	-0.24702	0.052819	0.443	0.625	1	0	SFARI					2	0
ENSMUSG00000029270	Dipk1a	0.0307624	0.0297132	-0.18706	0.0354867	0.125	0.2615	1	0
ENSMUSG00000033419	Snap91	0.0307932	0.0321783	-0.29016	0.054619	0.466	0.6535	1	0
ENSMUSG00000057329	Bcl2	0.0308885	0.0095948	-0.202768	0.016724	0.136	0.267	1	0
ENSMUSG00000052302	Tbc1d30	0.0308907	0.00998812	-0.133267	0	0.045	0.142	1	0
ENSMUSG00000005897	Nr2c1	0.0310676	0.0212901	-0.141616	0.0301541	0.034	0.125	1	0
ENSMUSG00000042873	Lhfpl4	0.0310676	0.0212901	-0.141616	0.0301541	0.034	0.125	1	0
ENSMUSG00000059273	Zc3h4	0.0316568	0	-0.0901978	0	0.034	0.125	1	0	SFARI					2	0
ENSMUSG00000020516	Rps6kb1	0.0319037	0.0141036	-0.2503	0.0207493	0.25	0.4205	1	0
ENSMUSG00000043831	Lysmd4	0.0319141	0.0088992	-0.15269	0.00890957	0.114	0.2445	1	0
ENSMUSG00000024563	Smad2	0.0319724	0	-0.186878	0	0.068	0.17	1	0
ENSMUSG00000025439	Clns1a	0.0319742	0	-0.200299	0	0.068	0.17	1	0
ENSMUSG00000049755	Zfp672	0.0319861	0.0214749	-0.120222	0.0204035	0.034	0.125	1	0
ENSMUSG00000020628	Trappc12	0.0321285	0	-0.16665	0	0.08	0.193	1	0
ENSMUSG00000019828	Grm1	0.0324253	0.00731266	0.220688	0	0.42	0.2555	1	0
ENSMUSG00000005732	Ranbp1	0.0325215	0	0.0921182	0	0.102	0.023	1	0
ENSMUSG00000040481	Bptf	0.0325437	0.00291175	-0.153563	0.00664588	0.273	0.4715	1	0
ENSMUSG00000030678	Maz	0.032711	0.0245327	0.245654	0.0210345	0.205	0.091	1	0
ENSMUSG00000058498	Rnf207	0.0327174	0.0219422	-0.0901242	0.0206096	0.034	0.125	1	0
ENSMUSG00000030096	Slc6a6	0.032817	0.00935624	-0.121259	0.0164542	0.17	0.3355	1	0
ENSMUSG00000029787	Avl9	0.0329429	0.0200385	-0.152754	0.00976217	0.057	0.159	1	0
ENSMUSG00000031536	Polb	0.032961	0.00372326	-0.306655	0.00620147	0.295	0.4605	1	0
ENSMUSG00000036503	Rnf13	0.0329852	0.0255919	-0.125983	0.0269656	0.102	0.233	1	0
ENSMUSG00000015214	Mtmr1	0.033004	0.000982894	-0.173178	0.00923209	0.08	0.193	1	0
ENSMUSG00000020166	Cnot2	0.0330337	0.0132732	-0.251986	0.0297438	0.352	0.534	1	0
ENSMUSG00000051451	Crebzf	0.0331141	0.00326942	-0.238202	0.0251899	0.136	0.261	1	0
ENSMUSG00000058006	Mdn1	0.0331256	0.00946421	-0.16989	0.0141688	0.273	0.4375	1	0
ENSMUSG00000110105	Gm45844	0.0331861	0.0120114	-0.157524	0.0100507	0.034	0.1195	1	0
ENSMUSG00000063108	Zfp26	0.0332634	0.011145	-0.108508	0.0098565	0.045	0.142	1	0
ENSMUSG00000021066	Atl1	0.0333764	0.0320626	-0.225854	0.0493712	0.136	0.2725	1	0
ENSMUSG00000075376	Rc3h2	0.0335295	0.0153428	-0.222321	0.0203357	0.273	0.4315	1	0
ENSMUSG00000012114	Med15	0.0335733	0.00917516	-0.162258	0.00868209	0.136	0.267	1	0
ENSMUSG00000072501	Phf20l1	0.0336152	0.0308724	-0.209634	0.0776568	0.398	0.597	1	0
ENSMUSG00000025427	Rnf165	0.0336551	0.0243504	-0.203974	0.0260475	0.114	0.244	1	0
ENSMUSG00000035325	Sec31a	0.0339395	0.0107097	-0.164838	0.00957884	0.08	0.1875	1	0
ENSMUSG00000021327	Zkscan3	0.0339454	0.0213071	-0.22979	0.0406484	0.159	0.2955	1	0
ENSMUSG00000024135	Srbd1	0.0340858	0.0265817	-0.131026	0.0354867	0.091	0.222	1	0
ENSMUSG00000040549	Ckap5	0.0342454	0.0195361	-0.212573	0.0341216	0.284	0.4435	1	0
ENSMUSG00000027674	Pex5l	0.0344725	0.00540946	-0.192042	0.00591387	0.25	0.4145	1	0
ENSMUSG00000040543	Pitpnm3	0.0345785	0.0215479	-0.0925006	0.0292883	0.045	0.1475	1	0
ENSMUSG00000025959	Klf7	0.0346245	0	-0.224432	0	0.102	0.216	1	0	SFARI					3	0
ENSMUSG00000014195	Dnajc7	0.0347071	0.00772873	-0.156616	0.00839626	0.17	0.3125	1	0
ENSMUSG00000017831	Rab5a	0.0347477	0.0125427	-0.128812	0.0102527	0.034	0.1195	1	0
ENSMUSG00000025050	Pcgf6	0.0350024	0.0210741	-0.131912	0	0.057	0.159	1	0
ENSMUSG00000036391	Sec24a	0.0350824	0.00151306	-0.204079	0.00868209	0.136	0.261	1	0
ENSMUSG00000033278	Ptprm	0.0353021	0.00224074	-0.238009	0.002746	0.693	0.8125	1	0
ENSMUSG00000026707	Nsun6	0.0354533	0.0225113	-0.151098	0.0290107	0.057	0.159	1	0
ENSMUSG00000022280	Rnf19a	0.0357842	0	-0.140178	0	0.08	0.193	1	0
ENSMUSG00000021282	Eif5	0.0358145	0	-0.109973	0	0.091	0.216	1	0
ENSMUSG00000026478	Lamc1	0.036204	0.0186969	-0.264018	0.022755	0.182	0.3185	1	0
ENSMUSG00000064115	Cadm2	0.0362134	0.0145643	-0.298891	0.0512477	1	1	1	0	SFARI					2	0
ENSMUSG00000045636	Mtus1	0.0362326	0.000712871	-0.127472	0.0101507	0.045	0.136	1	0
ENSMUSG00000073514	Dok6	0.0364314	0.0134961	-0.282112	0.0134231	0.716	0.824	1	0
ENSMUSG00000042396	Rbm7	0.0365775	0.0330314	-0.127329	0.0304542	0.045	0.142	1	0
ENSMUSG00000086496	Gm14204	0.0367366	0	-0.120294	0	0.045	0.136	1	0
ENSMUSG00000027200	Sema6d	0.0368172	0.0445586	-0.355375	0.0727125	0.727	0.909	1	0
ENSMUSG00000034949	Zfr2	0.0368604	0.0427528	-0.135732	0.0483569	0.068	0.1875	1	0
ENSMUSG00000037509	Arhgef4	0.0368737	0.0284189	-0.165001	0.0183814	0.091	0.21	1	0
ENSMUSG00000025162	Csnk1d	0.0369604	0.0115069	-0.108508	0.0098565	0.068	0.176	1	0
ENSMUSG00000026927	Entr1	0.0372905	0.0105932	-0.141554	0	0.08	0.1875	1	0
ENSMUSG00000001985	Grik3	0.037392	0.0106659	-0.265104	0.0148928	0.125	0.2445	1	0	SFARI					2	0
ENSMUSG00000036095	Dgkb	0.0374793	0.0406382	-0.343614	0.0600255	0.989	0.966	1	0
ENSMUSG00000063511	Snrnp70	0.0374822	0.0130715	0.212966	0.0287382	0.875	0.7725	1	0
ENSMUSG00000046364	Rpl27a	0.0375624	0.0311917	0.240607	0.0317167	0.17	0.0685	1	0
ENSMUSG00000027835	Pdcd10	0.0376154	0.0115804	-0.149731	0.00957884	0.08	0.1875	1	0
ENSMUSG00000030695	Aldoa	0.0377724	0.0226488	0.275485	0.0262711	0.307	0.1705	1	0
ENSMUSG00000019888	Mgat4c	0.0378228	0.0284312	0.474139	0.0449034	0.67	0.517	1	0
ENSMUSG00000039943	Plcb4	0.0379487	0	-0.334419	0	0.25	0.375	1	0
ENSMUSG00000037197	Rbm17	0.0380352	0	0.159657	0	0.136	0.045	1	0
ENSMUSG00000059857	Ntng1	0.0384532	0.000855261	-0.311781	0.0114947	0.693	0.7895	1	0	SFARI					2	1
ENSMUSG00000022329	Stk3	0.038508	0	-0.130584	0	0.045	0.136	1	0
ENSMUSG00000022185	Acin1	0.0385879	0.0227032	-0.260214	0.0613803	0.193	0.3295	1	0
ENSMUSG00000038351	Sgsm2	0.0386345	0	-0.194378	0	0.125	0.25	1	0
ENSMUSG00000038733	Wdr26	0.038749	0.0314012	-0.186899	0.0240044	0.182	0.341	1	0	SFARI						1
ENSMUSG00000022515	Anks3	0.0388755	0.0104673	-0.127266	0.00906797	0.114	0.2445	1	0
ENSMUSG00000037062	Sh3glb1	0.0390071	0.0010437	-0.187975	0.00923209	0.068	0.17	1	0
ENSMUSG00000032913	Lrig2	0.0390101	0.0465638	-0.18339	0.0523263	0.102	0.239	1	0
ENSMUSG00000031093	Dock11	0.039059	0.0174345	-0.152635	0.00819394	0.182	0.3295	1	0
ENSMUSG00000038860	Garnl3	0.0391398	0	-0.145851	0	0.045	0.136	1	0
ENSMUSG00000031278	Acsl4	0.0391885	0.0120204	-0.13612	0.00966964	0.08	0.1875	1	0
ENSMUSG00000031865	Dctn1	0.0393569	0.00247515	-0.265197	0.015575	0.182	0.307	1	0
ENSMUSG00000008604	Ubqln4	0.0394357	0.000972105	-0.118982	0.0202014	0.045	0.136	1	0
ENSMUSG00000000131	Xpo6	0.0394995	0.00307195	-0.182152	0.0172909	0.136	0.261	1	0
ENSMUSG00000025508	Rplp2	0.0395561	0.0022389	0.25067	0.0104631	0.182	0.08	1	0
ENSMUSG00000044533	Rps2	0.0396136	0.0321233	0.185112	0.0214774	0.17	0.0685	1	0
ENSMUSG00000038774	Ascc3	0.0398142	0.00892624	-0.234145	0.0187187	0.341	0.523	1	0
ENSMUSG00000002845	Tmem39a	0.0399723	0.0144475	-0.118982	0.0202014	0.034	0.1195	1	0
ENSMUSG00000036356	Csgalnact1	0.0399871	0.00191806	-0.31701	0.055827	0.25	0.409	1	0
ENSMUSG00000003778	Brd8	0.0400366	0.0327335	-0.143677	0.046168	0.091	0.21	1	0
ENSMUSG00000066613	Zfp932	0.0400872	0.0130345	-0.123615	0.0098565	0.057	0.1535	1	0
ENSMUSG00000032612	Usp4	0.0401729	0.0044709	0.244305	0.0198092	0.25	0.136	1	0
ENSMUSG00000042225	Ammecr1	0.0404066	0	-0.142958	0	0.068	0.17	1	0
ENSMUSG00000028132	Tlcd4	0.040651	0.0151605	-0.157808	0.0385004	0.057	0.1535	1	0
ENSMUSG00000026610	Esrrg	0.0408418	0.0250215	-0.371204	0.0375554	0.273	0.409	1	0
ENSMUSG00000044477	Zfand3	0.0409672	0.0215499	-0.238402	0.0369083	0.409	0.5855	1	0
ENSMUSG00000034751	Mast4	0.0409677	0.000606185	-0.217059	0.0150023	0.125	0.25	1	0
ENSMUSG00000028467	Gba2	0.0410119	0.0168903	0.229946	0.0106822	0.17	0.074	1	0
ENSMUSG00000061613	U2af1	0.0410719	0.000962721	-0.181924	0.00966964	0.057	0.148	1	0
ENSMUSG00000037876	Jmjd1c	0.0413373	0.0111311	-0.211688	0.00506274	0.489	0.659	1	0	SFARI					2	0
ENSMUSG00000006057	Atp5g1	0.0414186	0.0294834	0.258145	0.0210345	0.193	0.091	1	0
ENSMUSG00000033871	Ppargc1b	0.0416766	0.0279458	-0.15063	0.0168622	0.159	0.301	1	0
ENSMUSG00000021610	Clptm1l	0.0417526	0	0.175087	0	0.148	0.057	1	0
ENSMUSG00000087535	Zmiz1os1	0.0417534	0.046015	0.144208	0.0338199	0.102	0.0225	1	0
ENSMUSG00000051403	Ppp1r37	0.0419286	0	-0.129283	0	0.068	0.17	1	0
ENSMUSG00000039428	Tmem135	0.0419536	0.00708015	-0.237395	0	0.239	0.392	1	0
ENSMUSG00000020189	Osbpl8	0.0419788	0.00774711	0.140819	0.0169556	0.92	0.801	1	0
ENSMUSG00000104106	Gm10848	0.0420684	0.0117814	-0.112425	0.0170027	0.136	0.2785	1	0
ENSMUSG00000029403	Cdkl2	0.0421007	0.0349405	0.145933	0.0217059	0.17	0.0685	1	0
ENSMUSG00000040824	Snrpd2	0.0421152	0.0229619	0.128178	0.0111492	0.125	0.0395	1	0
ENSMUSG00000040276	Pacsin1	0.0425992	0.0107465	-0.197793	0.0290658	0.375	0.568	1	0
ENSMUSG00000037622	Wdtc1	0.0428188	0.0154804	-0.176811	0.0196187	0.045	0.1305	1	0
ENSMUSG00000031990	Jam3	0.0428325	0.00124593	-0.215923	0.00914929	0.08	0.182	1	0
ENSMUSG00000030064	Frmd4b	0.0428552	0.0347887	-0.200293	0.0698999	0.239	0.403	1	0
ENSMUSG00000021665	Hexb	0.0429165	0.0343974	0.196475	0.0212537	0.17	0.0685	1	0
ENSMUSG00000022844	Pdia5	0.0430901	0.00125328	-0.163215	0.00948974	0.08	0.182	1	0
ENSMUSG00000032905	Atg12	0.0431295	0.000689069	-0.128812	0.0102527	0.034	0.114	1	0
ENSMUSG00000021039	Snw1	0.0431457	0	-0.161281	0	0.057	0.148	1	0
ENSMUSG00000036835	Psenen	0.0431457	0	0.161281	0	0.148	0.057	1	0
ENSMUSG00000030556	Lrrc28	0.0432295	0.0313549	-0.0993353	0.0340078	0.136	0.278	1	0
ENSMUSG00000041926	Rnpep	0.0433008	0.0137722	-0.123615	0.0098565	0.057	0.1535	1	0
ENSMUSG00000031778	Cx3cl1	0.0434918	0.0510337	0.244814	0.0716181	0.352	0.2105	1	0
ENSMUSG00000045216	Hs6st1	0.0435	0.0354657	-0.153232	0.0374405	0.114	0.233	1	0
ENSMUSG00000090093	Gm14399	0.0436167	0	-0.121562	0	0.034	0.114	1	0
ENSMUSG00000022124	Fbxl3	0.0436175	0.0257521	-0.141491	0.0190686	0.068	0.1705	1	0
ENSMUSG00000054434	Tmem120b	0.0436838	0.0408277	-0.142811	0.0507637	0.034	0.119	1	0
ENSMUSG00000062590	Armc9	0.0436968	0.0134576	-0.222296	0.0236336	0.182	0.3125	1	0
ENSMUSG00000029088	Kcnip4	0.0438246	0.0397381	-0.32805	0.0450762	1	0.9945	1	0
ENSMUSG00000030286	Emc3	0.0438816	0.0139384	-0.108508	0.0098565	0.057	0.1535	1	0
ENSMUSG00000113216	Gm40841	0.0440609	0.0389453	-0.262653	0.0469112	0.341	0.5	1	0
ENSMUSG00000116894	4930547E14Rik	0.0444591	0	-0.128008	0	0.068	0.17	1	0
ENSMUSG00000025246	Tbl1x	0.044503	0.0140502	-0.277607	0.0181632	0.352	0.5055	1	0	SFARI					2	0
ENSMUSG00000057522	Spop	0.044861	0.0131096	-0.206767	0.0220977	0.205	0.3465	1	0
ENSMUSG00000000088	Cox5a	0.0449775	0.0130994	0.242586	0.00957884	0.284	0.1645	1	0
ENSMUSG00000038665	Dgki	0.0450226	0.00353676	-0.245232	0.0046903	0.943	0.949	1	0
ENSMUSG00000056158	Car10	0.0451962	0.0136353	-0.216423	0	0.375	0.5225	1	0
ENSMUSG00000029199	Lias	0.0452543	0.000727055	-0.141756	0.0100507	0.034	0.114	1	0
ENSMUSG00000041272	Tox	0.0454295	0.0434052	-0.288952	0.0188339	0.25	0.4035	1	0
ENSMUSG00000039000	Ube3c	0.0455654	0.0389579	-0.225404	0.0422187	0.284	0.443	1	0	SFARI					2	0
ENSMUSG00000014164	Klhl3	0.045681	0.00246351	-0.249249	0.00752874	0.205	0.33	1	0
ENSMUSG00000055835	Zfp1	0.0460282	0	-0.133267	0	0.057	0.148	1	0
ENSMUSG00000029068	Ccnl2	0.0462736	0.0366361	0.295349	0.0295713	0.273	0.165	1	0
ENSMUSG00000006920	Ezh1	0.0463578	0.00106701	-0.152754	0.00976217	0.057	0.148	1	0
ENSMUSG00000025529	Zfp711	0.0465898	0.038147	-0.125283	0.0377873	0.068	0.176	1	0	SFARI					2	0
ENSMUSG00000027660	Skil	0.0468048	0.0401694	-0.0509781	0.0304542	0.045	0.142	1	0
ENSMUSG00000003299	Mrpl4	0.0468096	0	-0.120294	0	0.034	0.114	1	0
ENSMUSG00000027282	Mtch2	0.0468285	0.0253169	-0.144032	0.00923209	0.102	0.216	1	0
ENSMUSG00002075217	ENSMUSG00002075217	0.0468868	0.0434758	0.210495	0.0400106	0.25	0.131	1	0
ENSMUSG00000025104	Hdgfl3	0.0469237	0.0396754	-0.26165	0.0484225	0.261	0.409	1	0
ENSMUSG00000032503	Arpp21	0.0470304	0.0541927	-0.231941	0.0678156	0.943	0.903	1	0
ENSMUSG00000030868	Dctn5	0.0471712	0	-0.105795	0	0.034	0.114	1	0
ENSMUSG00000051331	Cacna1c	0.0471769	0.0426127	-0.206262	0.0472035	0.932	0.955	1	0	SFARI					1	1
ENSMUSG00000030172	Erc1	0.0471818	0.0287327	-0.225435	0.0268473	0.273	0.426	1	0
ENSMUSG00000067336	Bmpr2	0.0471831	0.0237663	-0.153468	0.0062394	0.273	0.4375	1	0
ENSMUSG00000022197	Pdzd2	0.047425	0.0137037	-0.230519	0.00860882	0.091	0.199	1	0
ENSMUSG00000029422	Rsrc2	0.0474757	0.0217704	-0.27684	0	0.159	0.2725	1	0
ENSMUSG00000009216	Fam163b	0.0475212	0.00100643	-0.112899	0.0307603	0.034	0.114	1	0
ENSMUSG00000056258	Kcnq3	0.0476153	0.00471509	-0.267324	0.00828264	0.841	0.83	1	0	SFARI;EAGLE;TADA	0.00084541	Moderate	11.1	Discordant	1	0
ENSMUSG00000029276	Glmn	0.0476571	0.0408475	-0.138747	0.0295713	0.057	0.153	1	0
ENSMUSG00000034007	Scaper	0.0476922	0.0457545	-0.171895	0.0574879	0.239	0.4035	1	0
ENSMUSG00000054874	Pcnx3	0.0476956	0.040353	0.215812	0.0219393	0.148	0.0565	1	0
ENSMUSG00000028229	Rmdn1	0.0480752	0.0235808	-0.194748	0.00696344	0.273	0.426	1	0
ENSMUSG00000026737	Pip4k2a	0.0480867	0	-0.111031	0	0.091	0.205	1	0
ENSMUSG00000034656	Cacna1a	0.0481448	0.0158658	-0.242704	0.0214774	0.807	0.8695	1	0	SFARI					1	1
ENSMUSG00000020246	Hcfc2	0.0482776	0.0413382	-0.12348	0.0295713	0.057	0.153	1	0
ENSMUSG00000101585	1600010M07Rik	0.0484038	0	-0.18927	0	0.159	0.284	1	0
ENSMUSG00000031161	Hdac6	0.0484052	0.0186424	0.240452	0.0105715	0.182	0.0855	1	0
ENSMUSG00000040250	Ints13	0.04842	0.0148093	-0.176573	0.00940227	0.068	0.1645	1	0
ENSMUSG00000022000	Zc3h13	0.0484203	0.0106665	-0.185779	0.0224215	0.216	0.375	1	0
ENSMUSG00000042182	Bend6	0.0484529	0.0150443	-0.151227	0.00966964	0.068	0.1645	1	0
ENSMUSG00000042751	Nmnat2	0.0485971	0.0185031	-0.255054	0.0187187	0.33	0.483	1	0
ENSMUSG00000007908	Hmgcll1	0.0487545	0.0235028	-0.253636	0.0263276	0.284	0.4435	1	0
ENSMUSG00000022075	Rhobtb2	0.0487871	0.0153566	-0.125469	0.018892	0.091	0.199	1	0
ENSMUSG00000057363	Uxs1	0.0488114	0.00259365	-0.13119	0.017742	0.125	0.25	1	0
ENSMUSG00000072694	1500011B03Rik	0.049172	0.0529326	-0.110309	0.0502633	0.034	0.125	1	0
ENSMUSG00000022403	St13	0.0492122	0.0369344	-0.134723	0.0434167	0.125	0.256	1	0
ENSMUSG00000036023	Parp2	0.0492429	0	0.211504	0	0.159	0.068	1	0
ENSMUSG00000061315	Naca	0.0493408	0.0418596	0.17517	0.0219393	0.148	0.0565	1	0
ENSMUSG00000022974	Paxbp1	0.0493478	0.0106548	-0.215554	0.00726081	0.227	0.3695	1	0
ENSMUSG00000053825	Ppfia2	0.0493919	0.0182677	-0.341897	0.028241	0.682	0.761	1	0
ENSMUSG00000031391	L1cam	0.0494626	0.00311038	0.246037	0.0102527	0.205	0.102	1	0
ENSMUSG00000112308	Gm48512	0.0495042	0.0297576	-0.111858	0.0381405	0.068	0.1705	1	0
ENSMUSG00000025762	Larp1b	0.0496553	0.016549	-0.12616	0.0100507	0.045	0.1305	1	0
ENSMUSG00000034686	Prr7	0.049884	0	0.16665	0	0.193	0.091	1	0
ENSMUSG00000058589	Anks1b	0.0501715	0.0144481	-0.138287	0.0270337	0.989	1	1	0	SFARI					2	1
ENSMUSG00000063297	Luzp2	0.0503203	0.0312466	-0.129428	0.110163	0.08	0.1935	1	0
ENSMUSG00000018076	Med13l	0.0509431	0.000519294	-0.277506	0.0127519	0.318	0.466	1	0	SFARI;EAGLE;TADA	6.23e-06	Definitive	35	Concordant	1	1
ENSMUSG00000016493	Cd46	0.0509624	0.0590531	-0.0851294	0.0588705	0.057	0.1645	1	0
ENSMUSG00000037669	Ldah	0.0509992	0.0526993	-0.164456	0.0479027	0.068	0.1705	1	0
ENSMUSG00000025551	Fgf14	0.0511802	0.0484105	0.176472	0.0421412	1	1	1	0	SFARI					3	0
ENSMUSG00000090112	Shprh	0.0512257	0.023362	0.244785	0.0171456	0.352	0.2275	1	0
ENSMUSG00000040865	Ino80d	0.051388	0.0483264	-0.152535	0.0686066	0.125	0.2615	1	0
ENSMUSG00000028292	Rars2	0.0516275	0.0121238	-0.120854	0	0.114	0.233	1	0
ENSMUSG00000026743	Mllt10	0.0517764	0.00477793	-0.189633	0.00425946	0.659	0.7445	1	0
ENSMUSG00000035614	Togaram1	0.0518882	0.014842	-0.092202	0.018056	0.125	0.2555	1	0
ENSMUSG00000025920	Stau2	0.0520838	0.0155499	-0.226199	0.00538333	0.455	0.631	1	0
ENSMUSG00000054976	Nyap2	0.0522716	0.0183428	-0.243093	0.0109107	0.364	0.5225	1	0
ENSMUSG00000050565	Tor1aip2	0.0522785	0.0413863	-0.166434	0.0445547	0.114	0.233	1	0
ENSMUSG00000020111	Micu1	0.0523282	0.0160921	-0.208609	0.0249843	0.159	0.2785	1	0
ENSMUSG00000031924	Cyb5b	0.0524226	0.0173941	-0.0667508	0.0102527	0.045	0.1305	1	0
ENSMUSG00000032174	Icam5	0.0524583	0.0150889	0.267602	0.00966964	0.261	0.1535	1	0
ENSMUSG00000040782	Cop1	0.052465	0.0356285	-0.197673	0.039241	0.307	0.483	1	0
ENSMUSG00000066113	Adamtsl1	0.052904	0.00376727	-0.319324	0.0279508	0.148	0.273	1	0
ENSMUSG00000060373	Hnrnpc	0.0531063	0.0246208	-0.220652	0.0211801	0.273	0.4205	1	0
ENSMUSG00000021895	Arhgef3	0.0531974	0.00083679	-0.25534	0.0230985	0.17	0.295	1	0
ENSMUSG00000033102	Cdc14b	0.0532136	0.0282406	-0.136146	0.0183814	0.114	0.2275	1	0
ENSMUSG00000090386	Mir99ahg	0.0533694	0.00875935	0.269294	0.00664588	0.58	0.4375	1	0
ENSMUSG00000035139	Secisbp2	0.0534929	0.0325945	-0.131844	0.0198092	0.057	0.1475	1	0
ENSMUSG00000018481	Appbp2	0.0536351	0.0147036	-0.154109	0.00898807	0.114	0.2215	1	0
ENSMUSG00000022228	Zscan26	0.0537168	0.00127604	-0.077986	0.00976217	0.08	0.182	1	0
ENSMUSG00000038170	Pde4dip	0.0537778	0.0189968	-0.248538	0.0404068	0.489	0.642	1	0
ENSMUSG00000026313	Hdac4	0.0537934	0.014647	-0.191103	0.0148928	0.239	0.3805	1	0	SFARI					2	1
ENSMUSG00000068206	Pick1	0.0539047	0.0255196	0.153566	0.0109107	0.136	0.051	1	0
ENSMUSG00000050334	C130071C03Rik	0.0540978	0.0265392	-0.329283	0.0263617	0.398	0.5565	1	0
ENSMUSG00000039089	L3mbtl3	0.0541594	0.0148847	-0.0995214	0.00906797	0.08	0.1875	1	0
ENSMUSG00000028496	Mllt3	0.0543511	0.0250776	-0.284658	0.020302	0.477	0.574	1	0
ENSMUSG00000020124	Usp15	0.054446	0.00839761	-0.143364	0	0.239	0.4035	1	0	SFARI					2	0
ENSMUSG00000087086	Gm13269	0.0546724	0.0164052	-0.129868	0.0229254	0.205	0.358	1	0
ENSMUSG00000067028	Cntnap5b	0.0546743	0.0167835	-0.41743	0.0209267	0.227	0.3525	1	0
ENSMUSG00000020128	Vps54	0.0546759	0.0259512	0.171322	0.0171456	0.364	0.2275	1	0
ENSMUSG00000064065	Ipcef1	0.0548298	0.0298299	-0.275835	0.0247819	0.102	0.2045	1	0
ENSMUSG00000028328	Tmod1	0.0550406	0.0163202	-0.229577	0.0230985	0.193	0.3125	1	0
ENSMUSG00000015289	Lage3	0.0550912	0.0203121	-0.150346	0.0202014	0.034	0.108	1	0
ENSMUSG00000047037	Nipa1	0.0551653	0.0596275	-0.0952123	0.0561687	0.102	0.233	1	0	SFARI					2	0
ENSMUSG00000087700	Gm15283	0.0551909	0.0335427	-0.117767	0.0200034	0.057	0.1475	1	0
ENSMUSG00000045078	Rnf216	0.0552477	0.0337642	-0.0779907	0.00826028	0.148	0.29	1	0
ENSMUSG00000026309	Ilkap	0.0552629	0.00173054	-0.1025	0.0200034	0.057	0.148	1	0
ENSMUSG00000040738	Ints8	0.0554124	0.0121823	-0.154723	0	0.148	0.267	1	0
ENSMUSG00000017478	Zc3h18	0.055434	0.0326085	-0.134654	0.0287382	0.08	0.1815	1	0
ENSMUSG00000024425	Ndfip1	0.0555309	0.0292959	0.259464	0.00758471	0.42	0.2955	1	0
ENSMUSG00000035681	Kcnc2	0.0557518	0.0196589	-0.418597	0.0316348	0.352	0.4885	1	0	SFARI					3	0
ENSMUSG00000047141	Zfp654	0.0558277	0.0111647	-0.0759489	0	0.148	0.2895	1	0
ENSMUSG00000036333	Kidins220	0.0559903	0.0147447	0.525045	0.0650508	0.727	0.67	1	0
ENSMUSG00000002010	Idh3g	0.0567962	0	0.13465	0	0.125	0.045	1	0
ENSMUSG00000010086	Rnf112	0.0570168	0	0.284729	0	0.307	0.205	1	0
ENSMUSG00000025759	Mfsd8	0.0576178	0.019427	-0.1025	0.0200034	0.045	0.1305	1	0
ENSMUSG00000038619	Ensa	0.0576286	0.0171088	-0.149731	0.00957884	0.08	0.176	1	0
[truncated: 4,659 more rows]

## Sheet: Interneuron
ensembl	gene	p_val.mean	p_val.std	avg_log2FC.mean	avg_log2FC.std	pct.1.mean	pct.2.mean	padj.mean	padj.std	ASD.status	TADA.FDR	EAGLE.annotation	EAGLE.score	EAGLE.concordance	SFARI.score	SFARI.syndromic
[truncated: 7,056 more rows]

[truncated: 5 more sheets: Astrocyte, Microglia, Oligodendrocyte, Polydendrocyte, Pseudo-bulk]
