# Supplementary material for: An X-linked long non-coding RNA, PTCHD1-AS, regulates autistic behaviors in humans and in mice
Source: Research Square preprint supplement (doi:10.21203/rs.3.rs-5619348/v1), 2025-01-13
Supplement: Supplementary file 28 [file Supplementary Table 9.xlsx]

## Sheet: congruent
ensembl	gene	p_val.mean.KO-2	p_val.std.KO-2	avg_log2FC.mean.KO-2	avg_log2FC.std.KO-2	pct.1.mean.KO-2	pct.2.mean.KO-2	p_val_adj.mean.KO-2	p_val_adj.std.KO-2	p_val.mean.KO-1	p_val.std.KO-1	avg_log2FC.mean.KO-1	avg_log2FC.std.KO-1	pct.1.mean.KO-1	pct.2.mean.KO-1	p_val_adj.mean.KO-1	p_val_adj.std.KO-1	type	code
ENSMUSG00000000056	Narf	0.402506	0.0540402	0.0100089	0.00440666	0.106	0.0975	1	0	0.177233	0.179167	0.00950308	0.0120474	0.146	0.12925	1	0	Congruent	UU
ENSMUSG00000000088	Cox5a	3.96989e-16	2.72482e-16	0.195317	0.00457873	0.253	0.1485	9.85962e-12	6.76736e-12	6.2547e-08	1.24969e-07	0.134666	0.0131037	0.24	0.1695	0.00179235	0.0035811	Congruent	UU
ENSMUSG00000000127	Fer	0.788182	0.22216	-0.00889597	0.00295158	0.311	0.3015	1	0	0.553005	0.272336	-0.0476239	0.0223177	0.36	0.35275	1	0	Congruent	DD
ENSMUSG00000000149	Gna12	3.71018e-14	2.21682e-14	-0.201845	0.00171308	0.071	0.146	9.21459e-10	5.50569e-10	0.00606598	0.00492763	-0.0694801	0.000695036	0.103	0.128	1	0	Congruent	DD
ENSMUSG00000000168	Dlat	0.220128	0.182784	0.0137553	0.00836947	0.155	0.1385	1	0	0.316727	0.212319	0.0121579	0.0110661	0.181	0.168	1	0	Congruent	UU
ENSMUSG00000000184	Ccnd2	1.75188e-08	2.90346e-09	0.147715	0.000890563	0.232	0.1605	0.000435096	7.21103e-05	3.7462e-06	7.46786e-06	0.129311	0.0193966	0.239	0.177	0.107351	0.213999	Congruent	UU
ENSMUSG00000000194	Gpr107	0.853755	0.10657	-0.00102488	0.00436061	0.112	0.11	1	0	0.853367	0.145557	-0.00746569	0.00408543	0.122	0.12	1	0	Congruent	DD
ENSMUSG00000000223	Drp2	5.37045e-06	2.30188e-06	0.086439	0	0.156	0.1065	0.133381	0.0571695	5.22965e-05	9.41397e-05	0.0680227	0.00750826	0.172	0.1265	0.363052	0.436679	Congruent	UU
ENSMUSG00000000253	Gmpr	0.0117431	0.0134456	0.0453473	0.00546993	0.122	0.095	1	0	8.46423e-05	9.98875e-05	0.0640118	0.00593965	0.145	0.106	0.752719	0.453331	Congruent	UU
ENSMUSG00000000266	Mid2	2.23993e-06	5.8065e-07	0.092539	0.00198761	0.137	0.089	0.0556309	0.014421	0.0146432	0.011522	0.0333035	0.00831515	0.145	0.11975	1	0	Congruent	UU
ENSMUSG00000000276	Dgke	0.00897642	0.00728196	0.0432937	0.00244697	0.137	0.108	1	0	0.00561545	0.00761008	0.0537851	0.0142299	0.15	0.1195	0.92162	0.15676	Congruent	UU
ENSMUSG00000000296	Tpd52l1	0.000125798	4.5283e-05	0.0496071	0.00203926	0.103	0.0675	1	0	0.222	0.184012	0.0172894	0.0108819	0.106	0.094	1	0	Congruent	UU
ENSMUSG00000000305	Cdh4	3.75373e-07	5.08526e-07	0.170083	0.0118721	0.228	0.1615	0.00932277	0.0126297	0.00135583	0.00266155	0.121502	0.0248215	0.229	0.18675	0.687063	0.368335	Congruent	UU
ENSMUSG00000000308	Ckmt1	2.58454e-08	1.31551e-08	0.0853961	0.00153597	0.122	0.0685	0.000641897	0.00032672	9.38235e-07	8.46892e-07	0.073777	0.00989998	0.123	0.07825	0.0268861	0.0242685	Congruent	UU
ENSMUSG00000000326	Comt	0.00122785	0.00093027	0.0296376	0.0106867	0.237	0.1895	1	0	0.0291302	0.019909	0.0491912	0.00681329	0.242	0.21475	1	0	Congruent	UU
ENSMUSG00000000355	Mcts1	0.01081	0.00916544	0.0395768	0.00900394	0.199	0.1645	1	0	5.06598e-05	0.000100599	0.0778379	0.0153715	0.228	0.1695	0.257752	0.494975	Congruent	UU
ENSMUSG00000000374	Trappc10	0.161033	0.0577965	-0.0397583	0.00363686	0.134	0.1485	1	0	0.748446	0.152954	-0.00691795	0.00659288	0.136	0.13125	1	0	Congruent	DD
ENSMUSG00000000378	Ccm2	0.191225	0.0609032	0.0170892	0.00093505	0.161	0.1445	1	0	0.00330857	0.00483862	0.0518355	0.00521282	0.179	0.145	1	0	Congruent	UU
ENSMUSG00000000416	Cttnbp2	0.00381445	0.000808242	0.0678062	0.00464106	0.851	0.885	1	0	0.176243	0.210579	0.0274965	0.0144167	0.889	0.911	1	0	Congruent	UU
ENSMUSG00000000441	Raf1	0.0204581	0.0106977	0.0227058	0.00439458	0.294	0.253	1	0	0.44145	0.316798	0.00630821	0.018289	0.294	0.28275	1	0	Congruent	UU
ENSMUSG00000000532	Acvr1b	0.0193833	0.0198872	0.0334658	0.00655068	0.103	0.08	1	0	0.0866724	0.0663273	0.0206622	0.00453949	0.104	0.08825	1	0	Congruent	UU
ENSMUSG00000000538	Tom1l2	0.596548	0.0664498	-0.0505544	0.00344409	0.349	0.3295	1	0	0.395608	0.374323	-0.011531	0.0287565	0.385	0.3615	1	0	Congruent	DD
ENSMUSG00000000552	Zfp385a	0.000765897	0.000352574	0.0602746	0.00251576	0.116	0.083	1	0	0.0218818	0.0173358	0.0293375	0.00417961	0.104	0.084	1	0	Congruent	UU
ENSMUSG00000000560	Gabra2	1.81688e-09	7.07714e-10	0.215527	0.000467632	0.773	0.7745	4.5124e-05	1.75768e-05	0.0132804	0.0170404	0.0705832	0.0164504	0.776	0.77975	1	0	Congruent	UU
ENSMUSG00000000563	Atp5pb	4.52111e-10	9.9786e-11	0.144029	0.000892511	0.258	0.1735	1.12286e-05	2.47829e-06	8.16518e-06	1.3525e-05	0.0937923	0.0051195	0.262	0.2055	0.233981	0.387571	Congruent	UU
ENSMUSG00000000568	Hnrnpd	0.000280182	0.00025448	0.0512539	0.00647162	0.247	0.1925	1	0	0.00552352	0.00337084	0.0497719	0.0036915	0.27	0.233	1	0	Congruent	UU
ENSMUSG00000000600	Krit1	0.390695	0.225882	-0.0725345	0.019798	0.496	0.5015	1	0	0.129868	0.192208	-0.0589148	0.0283979	0.617	0.6455	1	0	Congruent	DD
ENSMUSG00000000605	Clcn4	1.26614e-07	4.48247e-08	0.0846016	0.00323048	0.196	0.129	0.00314458	0.00111327	0.000141981	0.000163118	0.0668998	0.0113719	0.167	0.12525	0.744427	0.475304	Congruent	UU
ENSMUSG00000000632	Sez6	5.43897e-23	6.27842e-23	0.309667	0.000737895	0.438	0.289	1.35082e-18	1.55931e-18	1.02309e-22	2.02828e-22	0.298403	0.019493	0.427	0.29875	2.93176e-18	5.81224e-18	Congruent	UU
ENSMUSG00000000708	Kat2b	6.15221e-07	6.8188e-07	-0.143883	0.00649911	0.106	0.1595	0.0152796	0.0169352	0.0750019	0.0624278	-0.0645303	0.012429	0.149	0.16625	1	0	Congruent	DD
ENSMUSG00000000738	Spg7	0.271842	0.0229191	0.0164507	0.00238741	0.133	0.12	1	0	0.00954875	0.00947239	0.0294193	0.00890492	0.141	0.1145	1	0	Congruent	UU
ENSMUSG00000000740	Rpl13	1.30791e-05	8.04604e-06	0.0769198	0.00620686	0.216	0.158	0.324832	0.199831	0.000184447	0.000361379	0.0879688	0.017011	0.194	0.14475	0.331053	0.463861	Congruent	UU
ENSMUSG00000000766	Oprm1	0.00119805	0.000184538	0.0530158	0.00246351	0.111	0.0795	1	0	0.00506634	0.0061471	0.0666878	0.00802478	0.146	0.11775	1	0	Congruent	UU
ENSMUSG00000000787	Ddx3x	0.0782239	0.0697609	0.0219956	0.0075953	0.138	0.1165	1	0	0.613065	0.187418	0.00138383	0.00422185	0.154	0.1475	1	0	Congruent	UU
ENSMUSG00000000794	Kcnn3	1.0005e-11	1.22888e-11	0.139457	0.00824545	0.239	0.1495	2.48483e-07	3.05204e-07	3.36782e-05	6.13269e-05	0.0822717	0.0184773	0.247	0.187	0.316306	0.47107	Congruent	UU
ENSMUSG00000000804	Usp32	0.0355484	0.0234618	-0.0604732	0.0116525	0.553	0.6005	1	0	0.000257584	0.000448624	-0.083956	0.00472662	0.595	0.65	0.793192	0.241422	Congruent	DD
ENSMUSG00000000823	Zfp512b	0.0996966	0.0686188	0.0301026	0.00391046	0.126	0.1085	1	0	5.43527e-07	4.79853e-07	0.0647176	0.00523813	0.135	0.08775	0.0155753	0.0137507	Congruent	UU
ENSMUSG00000000826	Dnajc5	0.0405884	0.00541714	0.0235903	0.000885154	0.205	0.1765	1	0	0.553395	0.356167	0.00203514	0.00820436	0.205	0.19575	1	0	Congruent	UU
ENSMUSG00000000881	Dlg3	0.00126004	0.00132974	0.0588558	0.00436891	0.149	0.113	1	0	1.97855e-05	3.16681e-05	0.0780236	0.0171466	0.172	0.122	0.339938	0.466608	Congruent	UU
ENSMUSG00000000948	Gm38393	1.50477e-12	6.96101e-13	0.181463	0.0015853	0.379	0.2735	3.73724e-08	1.72884e-08	0.000200068	0.000300517	0.0936959	0.0123549	0.39	0.33275	0.598858	0.487452	Congruent	UU
ENSMUSG00000000976	Heatr6	0.00542606	0.000349039	0.0418892	0.00240429	0.147	0.115	1	0	0.113707	0.115266	0.0326276	0.0125675	0.145	0.12725	1	0	Congruent	UU
ENSMUSG00000001036	Epn2	0.0319709	0.0111683	-0.193227	0.0133353	0.295	0.31	1	0	0.0232301	0.0290362	-0.1505	0.0234809	0.317	0.33775	1	0	Congruent	DD
ENSMUSG00000001054	Rmnd5b	0.033537	0.0331578	0.0267259	0.00702509	0.102	0.081	1	0	0.000871942	0.00126468	0.0429856	0.00936118	0.107	0.0745	0.591699	0.486726	Congruent	UU
ENSMUSG00000001062	Vps9d1	5.04389e-05	5.54693e-05	0.0617088	0.00650068	0.188	0.1355	0.639283	0.51013	6.00024e-06	9.22535e-06	0.0685495	0.00624769	0.186	0.13475	0.171943	0.264362	Congruent	UU
ENSMUSG00000001089	Luzp1	0.00274616	0.000273064	0.0480998	0.00135627	0.198	0.1585	1	0	0.186503	0.187172	0.0106048	0.0128008	0.194	0.1755	1	0	Congruent	UU
ENSMUSG00000001119	Col6a1	2.28699e-06	2.02232e-06	0.0998177	0.00395021	0.131	0.0835	0.0567997	0.0502263	9.81123e-10	1.95541e-09	0.115252	0.0140211	0.165	0.099	2.81151e-05	5.60343e-05	Congruent	UU
ENSMUSG00000001120	Pcbp3	0.0295804	0.00568859	0.031275	0.00309871	0.212	0.1825	1	0	0.0312449	0.0517733	0.0336093	0.0169345	0.225	0.19075	1	0	Congruent	UU
ENSMUSG00000001127	Araf	6.44895e-05	1.59492e-05	0.0868522	0.00119059	0.318	0.256	1	0	2.54127e-05	4.93687e-05	0.105216	0.0245207	0.335	0.26525	0.26577	0.490381	Congruent	UU
ENSMUSG00000001150	Mcm3ap	0.0455809	0.0224559	0.027172	0.00319436	0.18	0.155	1	0	5.82314e-06	1.06783e-05	0.0756448	0.00906017	0.195	0.1405	0.166868	0.305998	Congruent	UU
ENSMUSG00000001157	Gmcl1	0.176315	0.0460171	0.021394	0.00446985	0.27	0.248	1	0	0.00438883	0.00508444	0.0468788	0.0123932	0.288	0.24475	1	0	Congruent	UU
ENSMUSG00000001173	Ocrl	0.000467261	0.000355874	0.0758593	0.0089737	0.289	0.236	1	0	0.0142317	0.0238032	0.063978	0.019494	0.309	0.2715	1	0	Congruent	UU
ENSMUSG00000001175	Calm1	2.88615e-24	3.89814e-24	0.34139	0.00849033	0.555	0.4135	7.16804e-20	9.68142e-20	0.000704543	0.00109913	0.111008	0.0150384	0.537	0.49325	0.764301	0.471397	Congruent	UU
ENSMUSG00000001211	Agpat3	0.00271668	0.00260206	0.0512881	0.00705331	0.168	0.1305	1	0	0.0228421	0.034719	0.0373219	0.00753936	0.159	0.1325	1	0	Congruent	UU
ENSMUSG00000001248	Gramd1a	0.0156837	0.00145278	0.0374657	0.000501667	0.102	0.0795	1	0	4.74276e-05	7.1889e-05	0.0547032	0.009806	0.113	0.074	0.507015	0.569362	Congruent	UU
ENSMUSG00000001270	Ckb	4.83007e-30	1.907e-30	0.409804	0.0044802	0.789	0.715	1.1996e-25	4.73623e-26	1.11483e-42	1.26462e-42	0.461827	0.0105829	0.74	0.619	3.19465e-38	3.62388e-38	Congruent	UU
ENSMUSG00000001300	Efnb2	2.29984e-05	3.18029e-06	0.0811221	0.00292583	0.157	0.11	0.571189	0.0789856	0.0386673	0.041694	0.0489709	0.0116901	0.159	0.13525	1	0	Congruent	UU
ENSMUSG00000001323	Srr	0.520022	0.179614	-0.0284474	0.00671589	0.167	0.1725	1	0	0.766734	0.27293	-0.0145072	0.00942496	0.186	0.1805	1	0	Congruent	DD
ENSMUSG00000001415	Smg5	0.000108154	0.00010944	0.0793682	0.00988834	0.285	0.2255	0.882083	0.16676	1.57106e-18	3.1187e-18	0.217947	0.0118671	0.307	0.194	4.50204e-14	8.93695e-14	Congruent	UU
ENSMUSG00000001416	Cct3	0.114699	0.0682135	0.0223337	0.00674953	0.13	0.1115	1	0	0.00116282	0.00104294	0.0468944	0.00697196	0.144	0.111	1	0	Congruent	UU
ENSMUSG00000001419	Mef2d	0.000124875	0.00013762	0.0628418	0.00809282	0.216	0.1635	0.842272	0.223061	0.017221	0.0224698	0.0393479	0.0160634	0.195	0.16425	1	0	Congruent	UU
ENSMUSG00000001440	Kpnb1	1.02598e-06	1.81931e-07	0.0679238	0.00482108	0.165	0.108	0.0254811	0.00451845	0.115032	0.0825559	0.0189878	0.00730325	0.149	0.13125	1	0	Congruent	UU
ENSMUSG00000001441	Npepps	0.105062	0.0258551	-0.0292171	0.00522913	0.441	0.3965	1	0	0.151463	0.119414	-0.056501	0.00949378	0.497	0.51275	1	0	Congruent	DD
ENSMUSG00000001472	Tcf25	0.041897	0.0258749	0.0120704	0.00342776	0.311	0.276	1	0	0.032207	0.0497822	0.0277658	0.0162888	0.323	0.28275	1	0	Congruent	UU
ENSMUSG00000001521	Tulp3	0.0390646	0.0089154	0.00459892	0.00557709	0.149	0.1235	1	0	0.151717	0.139831	0.0237997	0.00976528	0.142	0.126	1	0	Congruent	UU
ENSMUSG00000001525	Tubb5	6.99054e-13	9.38753e-13	0.13288	0.00699413	0.161	0.0825	1.73617e-08	2.33149e-08	8.193e-05	0.000100779	0.0641071	0.014977	0.144	0.1025	0.718515	0.481732	Congruent	UU
ENSMUSG00000001542	Ell2	0.486191	0.0725228	-0.00973263	0	0.147	0.136	1	0	0.260695	0.321996	-0.044719	0.0126187	0.142	0.1545	1	0	Congruent	DD
ENSMUSG00000001576	Ergic1	0.0966237	0.0384583	0.0210639	0.00363686	0.191	0.1685	1	0	0.248266	0.169493	0.0108147	0.00720314	0.178	0.1635	1	0	Congruent	UU
ENSMUSG00000001627	Ifrd1	0.427983	0.248765	0.0069711	0.00690953	0.103	0.094	1	0	0.0651833	0.0511173	0.0232407	0.00647727	0.131	0.111	1	0	Congruent	UU
ENSMUSG00000001674	Ddx18	0.538131	0.183071	0.0148232	0.0053885	0.106	0.0995	1	0	0.119312	0.0695281	0.0151823	0.00573061	0.115	0.1	1	0	Congruent	UU
ENSMUSG00000001687	Ubl3	1.78417e-08	7.46355e-09	0.120539	0.00408279	0.383	0.29	0.000443115	0.000185365	0.0690397	0.0794702	0.0319215	0.0172219	0.354	0.32275	1	0	Congruent	UU
ENSMUSG00000001774	Chordc1	0.000185151	0.000111434	0.0679906	0.00317589	0.21	0.162	1	0	0.00202689	0.00276613	0.0389956	0.00777835	0.229	0.1885	1	0	Congruent	UU
ENSMUSG00000001786	Fbxo7	0.000317203	0.000129635	-0.109455	0.00359204	0.097	0.132	1	0	0.75934	0.205629	-0.0156924	0.00756613	0.116	0.11575	1	0	Congruent	DD
ENSMUSG00000001829	Clpb	0.0165608	0.00679119	0.0343813	0.00334394	0.145	0.118	1	0	0.307495	0.159215	0.00606638	0.00251258	0.145	0.133	1	0	Congruent	UU
ENSMUSG00000001833	Septin7	5.02336e-31	4.88535e-31	-0.722465	0.0021418	0.477	0.614	1.2476e-26	1.21332e-26	1.01426e-21	1.58973e-21	-0.507069	0.0250488	0.522	0.62525	2.90645e-17	4.55554e-17	Congruent	DD
ENSMUSG00000001909	Trmt1	0.000231427	8.57351e-05	0.0647788	0.00049057	0.138	0.0995	1	0	0.0240495	0.0430054	0.0306527	0.0118648	0.141	0.11175	1	0	Congruent	UU
ENSMUSG00000001911	Nfix	1.4476e-07	1.42142e-07	-0.156051	0.00168688	0.079	0.131	0.00359525	0.00353024	1.85789e-07	2.70014e-07	-0.135307	0.0134637	0.066	0.112	0.00532397	0.00773751	Congruent	DD
ENSMUSG00000001924	Uba1	0.00157431	0.00144508	0.0394207	0.00487174	0.132	0.097	1	0	3.83319e-05	5.55937e-05	0.0609053	0.00770115	0.147	0.1035	0.496697	0.530991	Congruent	UU
ENSMUSG00000001983	Taco1	0.456851	0.00211479	0.0109596	0.00279217	0.286	0.2725	1	0	9.11839e-36	1.82323e-35	0.283403	0.00986429	0.355	0.1925	2.61297e-31	5.22464e-31	Congruent	UU
ENSMUSG00000001985	Grik3	0.0194403	0.000316326	0.0633285	0.00207135	0.221	0.1895	1	0	0.00984789	0.00777581	0.0606183	0.0112099	0.23	0.1975	1	0	Congruent	UU
ENSMUSG00000001986	Gria3	1.05521e-15	3.20368e-17	0.179652	0.00132142	0.913	0.902	2.62073e-11	7.95667e-13	3.64812e-09	4.06583e-09	0.149594	0.0140548	0.914	0.92025	0.00010454	0.00011651	Congruent	UU
ENSMUSG00000001998	Ap4e1	0.0078884	0.00179575	0.0226029	0.00292863	0.127	0.0985	1	0	0.214647	0.169574	0.0127604	0.00556652	0.131	0.118	1	0	Congruent	UU
ENSMUSG00000002006	Pdzd4	3.48614e-09	1.87728e-09	0.124806	0.00287421	0.327	0.237	8.65817e-05	4.66242e-05	2.93713e-08	4.42754e-08	0.121838	0.00422905	0.334	0.2595	0.000841664	0.00126875	Congruent	UU
ENSMUSG00000002010	Idh3g	0.000371894	0.000340821	0.0532037	0.00291053	0.145	0.1045	1	0	4.89443e-08	7.64773e-08	0.0901375	0.0106733	0.153	0.0955	0.00140255	0.00219153	Congruent	UU
ENSMUSG00000002014	Ssr4	0.00929383	0.00253415	0.0351107	0.00186157	0.163	0.131	1	0	0.00365066	0.0047779	0.0542074	0.00765789	0.138	0.108	1	0	Congruent	UU
ENSMUSG00000002028	Kmt2a	0.0107868	0.00938467	0.0835472	0.00721119	0.733	0.7585	1	0	0.000677031	0.000641288	0.0843225	0.0132874	0.778	0.764	1	0	Congruent	UU
ENSMUSG00000002052	Supt6	0.00125805	0.000717743	0.0445925	0.00541189	0.202	0.1595	1	0	0.0198218	0.0138145	0.0275663	0.00421053	0.196	0.16625	1	0	Congruent	UU
ENSMUSG00000002064	Sdf2	0.0541728	0.0136064	0.0162355	0.000491278	0.11	0.09	1	0	0.0422427	0.0276296	0.0224724	0.00440787	0.109	0.09075	1	0	Congruent	UU
ENSMUSG00000002102	Psmc3	2.87995e-05	2.17138e-05	0.0646324	0.00148384	0.135	0.0905	0.666966	0.470981	2.83485e-08	3.43646e-08	0.0728853	0.00783743	0.126	0.07425	0.000812354	0.000984751	Congruent	UU
ENSMUSG00000002107	Celf2	4.99302e-43	2.25099e-43	0.504594	0.00186862	0.997	0.9905	1.24007e-38	5.59057e-39	1.03756e-11	1.58737e-11	0.222749	0.0287589	0.997	0.996	2.97324e-07	4.54878e-07	Congruent	UU
ENSMUSG00000002129	Sf3a1	0.00319795	0.00242019	0.0399079	0.00354479	0.101	0.0735	1	0	0.204581	0.212643	0.0118478	0.0116916	0.11	0.09575	1	0	Congruent	UU
ENSMUSG00000002222	Rmnd5a	0.000233308	8.01139e-06	0.0632039	0.00297479	0.259	0.2055	1	0	0.0465721	0.0486372	0.0294173	0.0104197	0.279	0.24725	1	0	Congruent	UU
ENSMUSG00000002265	Peg3	3.43362e-06	2.94513e-06	0.13362	0.00228329	0.468	0.4	0.0852775	0.0731452	0.580589	0.301477	0.00272991	0.0134832	0.549	0.56375	1	0	Congruent	UU
ENSMUSG00000002279	Lmf1	0.0126133	0.00158872	0.0305639	0.000992837	0.11	0.085	1	0	0.086715	0.0177649	0.0155762	0.00566403	0.108	0.0925	1	0	Congruent	UU
ENSMUSG00000002341	Ncan	0.000857627	0.000379973	0.04211	0.00343895	0.128	0.093	1	0	3.84179e-06	4.07988e-06	0.0657124	0.0080318	0.12	0.07675	0.11009	0.116913	Congruent	UU
ENSMUSG00000002455	Prpf6	0.123721	0.0460501	0.0059574	0.00310951	0.188	0.166	1	0	0.0109523	0.0177461	0.043828	0.0108217	0.212	0.17675	1	0	Congruent	UU
ENSMUSG00000002489	Tiam1	1.46394e-05	1.41764e-05	0.0964079	0.0060374	0.372	0.299	0.363584	0.352085	6.55425e-06	1.02487e-05	0.17507	0.0164722	0.429	0.366	0.187819	0.293687	Congruent	UU
ENSMUSG00000002617	Zfp40	0.151552	0.0353517	0.00925475	0.00375052	0.144	0.126	1	0	0.250717	0.239193	0.00555573	0.0139133	0.157	0.14175	1	0	Congruent	UU
ENSMUSG00000002625	Akap8l	0.00314898	0.00108575	0.0918084	0.00564134	0.666	0.6585	1	0	1.81976e-07	3.17609e-07	0.135499	0.0140113	0.655	0.608	0.00521472	0.00910139	Congruent	UU
ENSMUSG00000002660	Clpp	0.450608	0.156304	0.00704226	0.00712225	0.133	0.124	1	0	0.543927	0.209906	0.00304052	0.0106609	0.12	0.11925	1	0	Congruent	UU
ENSMUSG00000002688	Prkd1	1.88407e-05	4.87809e-06	0.0979882	0.000607588	0.401	0.323	0.467927	0.121152	0.00823748	0.00948526	0.105218	0.0426447	0.435	0.3865	0.755058	0.489884	Congruent	UU
ENSMUSG00000002808	Epdr1	0.166508	0.0445752	0.00817072	0.00193117	0.122	0.106	1	0	0.0704309	0.0948094	0.0254279	0.0118571	0.144	0.1225	1	0	Congruent	UU
ENSMUSG00000002833	Hdgfl2	0.1325	0.095655	0.0114991	0.00445152	0.102	0.0865	1	0	0.198628	0.320715	0.0190447	0.0155817	0.107	0.0925	1	0	Congruent	UU
ENSMUSG00000002900	Lamb1	0.0167249	0.0152148	0.04559	0.00649932	0.102	0.0795	1	0	0.0168104	0.0260594	0.0470281	0.0095515	0.121	0.09725	1	0	Congruent	UU
ENSMUSG00000002949	Timm44	0.0167096	0.00745611	0.0363032	0.00295877	0.251	0.2155	1	0	4.86347e-05	9.27883e-05	0.0918277	0.0148703	0.272	0.2135	0.298639	0.474892	Congruent	UU
ENSMUSG00000002957	Ap2a2	0.112723	0.0340949	0.00580961	0.00129982	0.217	0.193	1	0	7.63825e-07	8.98315e-07	0.0920647	0.00694073	0.244	0.18325	0.0218882	0.0257421	Congruent	UU
ENSMUSG00000002968	Med25	0.0631971	0.0471188	0.0204641	0.00525477	0.139	0.117	1	0	3.7638e-06	6.09069e-06	0.0623392	0.0070437	0.135	0.0905	0.107855	0.174535	Congruent	UU
ENSMUSG00000002981	Clptm1	0.036574	0.0154484	0.0310622	0.00228885	0.177	0.1515	1	0	0.00994728	0.0147578	0.050979	0.0101808	0.176	0.1435	1	0	Congruent	UU
ENSMUSG00000002984	Tomm40	0.0392702	0.00205532	0.0351242	0.00193391	0.134	0.1105	1	0	0.578889	0.268807	0.012529	0.0105492	0.121	0.1165	1	0	Congruent	UU
ENSMUSG00000002985	Apoe	0.000140161	8.67237e-05	0.0231541	0.0150946	0.211	0.2605	1	0	0.502596	0.402717	0.364519	0.0677953	0.204	0.19775	1	0	Congruent	UU
ENSMUSG00000002996	Hbp1	0.0430557	0.0132798	-0.051074	0.000933766	0.108	0.128	1	0	0.279349	0.144911	-0.0345475	0.00232329	0.131	0.14075	1	0	Congruent	DD
ENSMUSG00000002997	Prkar2b	5.57871e-09	2.35884e-09	0.155458	0.00120276	0.344	0.258	0.000138553	5.85841e-05	3.32736e-07	4.90587e-07	0.101551	0.0105875	0.397	0.322	0.00953489	0.0140583	Congruent	UU
ENSMUSG00000003062	Stard3nl	0.747085	0.0174576	-0.0275244	0.0065846	0.122	0.1195	1	0	0.534836	0.215201	-0.00244962	0.00523667	0.133	0.12525	1	0	Congruent	DD
ENSMUSG00000003072	Atp5d	1.77565e-05	2.95314e-06	0.08924	0.000971561	0.153	0.1065	0.441001	0.0733443	2.62718e-05	3.01794e-05	0.0642858	0.00900956	0.144	0.09925	0.504997	0.571621	Congruent	UU
ENSMUSG00000003131	Pafah1b2	0.561969	0.0329654	-0.00100943	0.00238072	0.127	0.12	1	0	0.735283	0.0160597	-0.0124972	0.00758349	0.134	0.13025	1	0	Congruent	DD
ENSMUSG00000003134	Tbc1d8	3.78883e-15	2.45191e-15	0.202552	0.00229503	0.394	0.269	9.40994e-11	6.08957e-11	3.92803e-08	3.24974e-08	0.130851	0.014329	0.403	0.3225	0.00112562	0.000931246	Congruent	UU
ENSMUSG00000003153	Slc2a3	0.000305955	0.000148319	0.0623232	0.00445866	0.221	0.172	1	0	2.83989e-06	3.31294e-06	0.0811975	0.00682214	0.254	0.19375	0.0813798	0.0949357	Congruent	UU
ENSMUSG00000003184	Irf3	0.300818	0.0886631	0.00855386	0.00339642	0.108	0.0965	1	0	0.0623376	0.0312215	0.016043	0.00201249	0.106	0.08925	1	0	Congruent	UU
ENSMUSG00000003226	Ranbp2	1.33895e-16	1.68169e-16	0.282978	0.00303062	0.446	0.311	3.32543e-12	4.17664e-12	0.325334	0.311789	0.061526	0.0243118	0.468	0.44875	1	0	Congruent	UU
ENSMUSG00000003228	Grk5	0.00842427	0.0065991	0.0592417	0.00375915	0.158	0.1275	1	0	0.364602	0.283162	0.00666732	0.0106592	0.136	0.12625	1	0	Congruent	UU
ENSMUSG00000003273	Car11	2.62616e-27	3.6433e-27	0.279772	0.00660287	0.394	0.232	6.52232e-23	9.0485e-23	2.6488e-18	3.06893e-18	0.189092	0.00790545	0.344	0.2305	7.59041e-14	8.79432e-14	Congruent	UU
ENSMUSG00000003279	Dlgap1	0.000212256	1.55128e-05	-0.257673	0.00202397	0.826	0.911	1	0	0.680145	0.269839	-0.044197	0.0176974	0.911	0.92725	1	0	Congruent	DD
ENSMUSG00000003316	Glg1	0.00876247	0.0101765	0.0457841	0.0183687	0.386	0.3355	1	0	0.00714047	0.00768836	0.042662	0.00824424	0.415	0.369	1	0	Congruent	UU
ENSMUSG00000003345	Csnk1g2	0.00500909	0.00454748	0.0403913	0.00499335	0.109	0.081	1	0	0.000153496	0.000232378	0.0551318	0.00398579	0.105	0.072	0.789814	0.420373	Congruent	UU
ENSMUSG00000003346	Abhd17a	2.74495e-07	1.95931e-07	0.0897973	0.00197033	0.151	0.095	0.00681736	0.00486615	9.35085e-12	1.30514e-11	0.0963981	0.0142045	0.128	0.06325	2.67958e-07	3.74001e-07	Congruent	UU
ENSMUSG00000003363	Pld3	1.90907e-14	4.37216e-15	0.186678	0.00127917	0.319	0.2105	4.74136e-10	1.08587e-10	6.27368e-15	1.25352e-14	0.165037	0.0126863	0.312	0.203	1.79778e-10	3.59209e-10	Congruent	UU
ENSMUSG00000003378	Grik5	1.14445e-08	1.34564e-08	0.138954	0.00854359	0.339	0.254	0.000284237	0.000334204	1.4357e-09	2.70481e-09	0.142198	0.0167334	0.363	0.27625	4.11414e-05	7.7509e-05	Congruent	UU
ENSMUSG00000003380	Rabac1	9.09614e-09	2.32813e-09	0.113515	0.00124331	0.278	0.1925	0.000225912	5.78213e-05	0.180038	0.108469	0.00708932	0.00871722	0.234	0.214	1	0	Congruent	UU
ENSMUSG00000003429	Rps11	1.60115e-06	1.49277e-06	0.0665931	0.00202912	0.109	0.0635	0.0397662	0.0370745	0.0235715	0.0165632	0.0392888	0.00180908	0.101	0.08175	1	0	Congruent	UU
ENSMUSG00000003435	Supt5	0.00151505	0.00144178	0.0459262	0.00798465	0.258	0.208	1	0	6.11038e-07	8.02145e-07	0.0865115	0.00729977	0.259	0.1935	0.0175099	0.0229863	Congruent	UU
ENSMUSG00000003452	Bicd1	8.25196e-06	1.15306e-05	-0.11482	0.0141024	0.588	0.688	0.204946	0.286373	0.0250307	0.0120446	-0.0539067	0.00651234	0.705	0.7475	1	0	Congruent	DD
ENSMUSG00000003534	Ddr1	1.64868e-06	1.90615e-06	-0.137242	0.0106911	0.099	0.1495	0.0409467	0.0473411	0.778322	0.17542	-0.00737185	0.00864279	0.112	0.10825	1	0	Congruent	DD
ENSMUSG00000003575	Crtc1	5.06139e-06	3.91093e-06	0.0839914	0.00277967	0.208	0.1495	0.125705	0.0971319	0.000262162	0.000303347	0.0636909	0.0139676	0.186	0.14275	0.7505	0.499	Congruent	UU
ENSMUSG00000003604	Aven	0.451837	0.116375	-0.0284573	0.00432161	0.102	0.108	1	0	0.462991	0.243582	-0.00484898	0.0112259	0.11	0.1035	1	0	Congruent	DD
ENSMUSG00000003660	Snrnp200	9.46533e-05	0.000107868	0.0624382	0.0043898	0.148	0.1035	0.728236	0.384333	3.65645e-07	4.20383e-07	0.0804393	0.00819293	0.16	0.10825	0.0104779	0.0120465	Congruent	UU
ENSMUSG00000003721	Insig2	0.00163552	0.000751715	0.0377669	0.00300631	0.11	0.079	1	0	0.000420936	0.000572693	0.0501207	0.00421864	0.108	0.07675	0.957789	0.084422	Congruent	UU
ENSMUSG00000003810	Mast2	0.170842	0.0522415	-0.0084127	0.00497723	0.271	0.2455	1	0	0.355634	0.201426	-0.0108924	0.0204988	0.293	0.27875	1	0	Congruent	DD
ENSMUSG00000003814	Calr	5.27669e-09	6.26248e-09	0.102949	0.0117937	0.301	0.2115	0.000131052	0.000155535	6.53575e-06	9.6373e-06	0.097214	0.0173793	0.27	0.20825	0.187289	0.276166	Congruent	UU
ENSMUSG00000003847	Nfat5	2.22893e-09	1.9689e-09	-0.174915	0.000939355	0.613	0.716	5.53577e-05	4.88997e-05	0.166664	0.24246	-0.0309961	0.0212571	0.64	0.67275	1	0	Congruent	DD
ENSMUSG00000003929	Zfp81	0.0522327	0.00875548	0.0134526	0.000490098	0.118	0.097	1	0	0.219208	0.162239	0.0126624	0.00305891	0.122	0.10875	1	0	Congruent	UU
ENSMUSG00000003934	Efnb3	0.119547	0.0185764	-0.0704833	0.00411071	0.106	0.1185	1	0	0.442221	0.151432	-0.00328146	0.0035181	0.104	0.096	1	0	Congruent	DD
ENSMUSG00000003949	Hlf	0.0393019	0.0203722	0.0288949	0.00187612	0.155	0.131	1	0	0.0799344	0.0731087	0.0314287	0.0139082	0.206	0.18325	1	0	Congruent	UU
ENSMUSG00000003970	Rpl8	1.43604e-07	1.14005e-08	0.0724853	0.00149471	0.13	0.077	0.00356654	0.000283143	0.0034457	0.0024617	0.0386403	0.00196274	0.104	0.07875	1	0	Congruent	UU
ENSMUSG00000003974	Grm3	0.157464	0.113235	-0.11376	0.0185329	0.695	0.7045	1	0	2.74791e-06	3.37145e-06	-0.189492	0.0215451	0.736	0.7805	0.0787442	0.0966124	Congruent	DD
ENSMUSG00000003992	Ssbp2	6.26198e-17	8.52466e-17	0.249299	0.00719014	0.889	0.908	1.55523e-12	2.11719e-12	0.00641807	0.0111421	0.072181	0.0133898	0.902	0.912	1	0	Congruent	UU
ENSMUSG00000004018	Fancl	0.0201757	0.0212353	0.0313683	0.00487406	0.123	0.0975	1	0	0.454795	0.48668	0.0117668	0.0166751	0.118	0.1065	1	0	Congruent	UU
ENSMUSG00000004031	Brinp2	0.0329615	0.00956762	0.0334095	0.000838586	0.229	0.198	1	0	0.196572	0.191616	0.0107888	0.00983544	0.269	0.246	1	0	Congruent	UU
ENSMUSG00000004056	Akt2	0.00368026	0.00101765	0.0353563	0.00150352	0.109	0.0805	1	0	0.0343433	0.0447295	0.0328336	0.00782812	0.105	0.08375	1	0	Congruent	UU
ENSMUSG00000004110	Cacna1e	1.72358e-40	1.32558e-40	0.379618	0.00555313	0.912	0.8695	4.28068e-36	3.29221e-36	7.74143e-11	1.54274e-10	0.18313	0.0134498	0.917	0.909	2.21838e-06	4.42089e-06	Congruent	UU
ENSMUSG00000004113	Cacna1b	0.0497491	0.0111966	0.0682783	0.00443677	0.511	0.502	1	0	0.0426294	0.0299711	0.0583855	0.0118565	0.573	0.55975	1	0	Congruent	UU
ENSMUSG00000004151	Etv1	0.798288	0.0103872	-0.0243394	0.00539045	0.122	0.1235	1	0	0.332348	0.265976	-0.0465837	0.0136442	0.155	0.1645	1	0	Congruent	DD
ENSMUSG00000004187	Kifc2	7.63878e-06	2.98751e-06	0.0776686	0.000472177	0.19	0.136	0.189717	0.0741977	1.45592e-05	1.93191e-05	0.0768821	0.0116997	0.175	0.126	0.373596	0.475421	Congruent	UU
ENSMUSG00000004207	Psap	8.44142e-10	9.50267e-10	0.122132	0.00633629	0.404	0.2975	2.09651e-05	2.36008e-05	9.35607e-13	1.87107e-12	0.19658	0.0238248	0.398	0.28525	2.68108e-08	5.36173e-08	Congruent	UU
ENSMUSG00000004267	Eno2	4.68703e-17	2.98757e-17	0.185695	0.00217932	0.32	0.201	1.16407e-12	7.41993e-13	2.41661e-29	2.25114e-29	0.235984	0.0024762	0.32	0.183	6.92505e-25	6.45088e-25	Congruent	UU
ENSMUSG00000004317	Clcn5	0.522146	0.07824	-0.0224194	0.00140871	0.105	0.1105	1	0	0.155311	0.136059	-0.0427763	0.0155558	0.106	0.11875	1	0	Congruent	DD
ENSMUSG00000004347	Pde1c	3.46081e-10	2.69577e-10	0.134332	0.0174387	0.404	0.2965	8.59526e-06	6.69522e-06	0.250153	0.179796	0.0528979	0.0286154	0.413	0.392	1	0	Congruent	UU
ENSMUSG00000004364	Cul3	0.0979778	0.00405909	0.0123015	0.0015192	0.319	0.289	1	0	0.0937146	0.0675514	0.0290478	0.0104185	0.352	0.32525	1	0	Congruent	UU
ENSMUSG00000004383	Large1	0.0914068	0.0120213	-0.0866965	0.00585868	0.825	0.898	1	0	0.0649496	0.0505158	-0.0705919	0.0141682	0.884	0.91825	1	0	Congruent	DD
ENSMUSG00000004508	Gab2	0.0443939	0.0270579	-0.166996	0.00826028	0.208	0.228	1	0	0.0070715	0.00845956	-0.136826	0.0138076	0.215	0.245	1	0	Congruent	DD
ENSMUSG00000004565	Pnpla6	0.0431037	0.0218173	0.0173154	0.00492584	0.112	0.0905	1	0	0.0814644	0.0705957	0.021491	0.00450542	0.1	0.08425	1	0	Congruent	UU
ENSMUSG00000004591	Pkn2	0.440968	0.239209	-0.0119302	0.0109772	0.322	0.304	1	0	0.322611	0.180042	-0.0560887	0.0132416	0.356	0.36075	1	0	Congruent	DD
ENSMUSG00000004633	Chn2	0.000698537	0.000597714	-0.11247	0.00861575	0.147	0.1875	1	0	0.387217	0.33922	-0.0647456	0.0250437	0.199	0.21	1	0	Congruent	DD
ENSMUSG00000004637	Wwox	0.126489	0.120119	-0.12696	0.0211406	0.372	0.3765	1	0	0.0630188	0.0658147	-0.0851692	0.0189836	0.485	0.50825	1	0	Congruent	DD
ENSMUSG00000004661	Arid3b	0.0657717	0.0133859	0.0437436	0.00294413	0.12	0.1015	1	0	0.71982	0.269144	0.00731042	0.00825391	0.111	0.107	1	0	Congruent	UU
ENSMUSG00000004698	Hdac9	1.05333e-05	3.55372e-06	-0.0908772	0.011196	0.501	0.599	0.261605	0.0882601	0.000351707	0.000332783	-0.0220607	0.0233504	0.564	0.63025	0.96084	0.0783193	Congruent	DD
ENSMUSG00000004771	Rab11a	0.21433	0.0574069	0.00898514	0.00196086	0.105	0.092	1	0	0.229442	0.187799	0.0136976	0.0112504	0.103	0.091	1	0	Congruent	UU
ENSMUSG00000004798	Ulk2	0.00246437	0.00111989	0.0538102	0.00704762	0.35	0.294	1	0	0.0153492	0.0139753	0.0572916	0.0115012	0.397	0.355	1	0	Congruent	UU
ENSMUSG00000004849	Ap1s1	4.43422e-05	2.43316e-05	0.0623205	0.00251576	0.119	0.079	0.836989	0.230532	8.498e-05	0.000101019	0.058599	0.00593912	0.116	0.0795	0.547983	0.524858	Congruent	UU
ENSMUSG00000004865	Srpk1	0.0050235	0.00183773	0.061703	0.00464757	0.257	0.218	1	0	0.000458818	0.000296526	0.0669711	0.00327768	0.266	0.22225	1	0	Congruent	UU
ENSMUSG00000004896	Rrnad1	0.00610893	0.00560696	0.0473085	0.00878838	0.173	0.139	1	0	0.0588863	0.0535767	0.0262039	0.0119746	0.17	0.148	1	0	Congruent	UU
ENSMUSG00000004897	Hdgf	0.00126482	0.000462419	0.0429468	0.000978551	0.128	0.094	1	0	2.69409e-05	3.25964e-05	0.063473	0.00283556	0.123	0.0855	0.480885	0.361196	Congruent	UU
ENSMUSG00000004933	Matk	2.8476e-20	1.43776e-20	0.218009	0.00173346	0.325	0.1955	7.07231e-16	3.57081e-16	5.56659e-25	1.11332e-24	0.246065	0.0180206	0.355	0.2105	1.59516e-20	3.19032e-20	Congruent	UU
ENSMUSG00000004936	Map2k1	6.35888e-07	5.68983e-08	0.0836495	0.000863793	0.262	0.1905	0.0157929	0.00141313	3.89188e-05	4.33963e-05	0.0834171	0.00433871	0.275	0.22	0.537615	0.534189	Congruent	UU
ENSMUSG00000004961	Syt5	3.00259e-18	3.16531e-18	0.174107	0.000969254	0.21	0.1065	7.45724e-14	7.86137e-14	9.84666e-13	6.96182e-13	0.122968	0.00152214	0.184	0.11075	2.82166e-08	1.99498e-08	Congruent	UU
ENSMUSG00000005045	Chd5	0.000582714	0.000474044	0.0511775	0.0067848	0.148	0.1085	1	0	0.000822015	0.000678514	0.0677327	0.00490045	0.151	0.11875	1	0	Congruent	UU
ENSMUSG00000005078	Jkamp	0.00026051	0.000300386	0.0570176	0.00822329	0.188	0.1405	1	0	0.0176116	0.0189375	0.0464257	0.00946634	0.172	0.14475	1	0	Congruent	UU
ENSMUSG00000005089	Slc1a2	0.00509401	0.000203031	0.124046	0.0181095	0.12	0.092	1	0	0.00984271	0.0126239	0.35107	0.0983358	0.109	0.0845	1	0	Congruent	UU
ENSMUSG00000005102	Eif2ak4	0.366939	0.0744061	-0.0378614	0.000451689	0.145	0.1535	1	0	0.477758	0.227104	-0.0114495	0.0150437	0.161	0.15375	1	0	Congruent	DD
ENSMUSG00000005262	Ufd1	0.110324	0.0163844	0.0187141	0	0.108	0.0915	1	0	0.0208683	0.0290986	0.0294229	0.0119147	0.108	0.08425	1	0	Congruent	UU
ENSMUSG00000005338	Cadm3	5.04358e-12	6.76326e-12	0.124	0.00628077	0.199	0.1145	1.25262e-07	1.67972e-07	1.44765e-05	2.43008e-05	0.0821552	0.0103613	0.175	0.12625	0.302395	0.474525	Congruent	UU
ENSMUSG00000005371	Fbxo11	9.14848e-05	7.15358e-05	0.0629567	0.00395659	0.439	0.363	1	0	0.0270005	0.0216778	0.0337165	0.00469072	0.473	0.433	1	0	Congruent	UU
ENSMUSG00000005417	Mprip	1.04719e-08	1.2521e-08	0.124744	0.00674533	0.426	0.327	0.00026008	0.00031097	0.0110825	0.0209536	0.0732405	0.0221681	0.433	0.3805	1	0	Congruent	UU
ENSMUSG00000005506	Celf1	0.00854399	0.00501558	0.0923417	0.00753801	0.783	0.8205	1	0	0.176443	0.0692762	0.0152399	0.0111552	0.799	0.80275	1	0	Congruent	UU
ENSMUSG00000005510	Ndufs3	0.00408372	0.00206489	0.0439899	0.0023054	0.181	0.1445	1	0	9.68013e-05	0.000146438	0.0682798	0.00855741	0.201	0.15275	0.518224	0.55689	Congruent	UU
ENSMUSG00000005514	Por	6.21727e-05	2.04133e-05	0.0791029	0.00140806	0.176	0.1285	1	0	8.94316e-05	7.56227e-05	0.0517027	0.007138	0.171	0.12825	0.863991	0.272017	Congruent	UU
ENSMUSG00000005533	Igf1r	0.109023	0.00497853	-0.113489	0.0082283	0.332	0.343	1	0	0.00782263	0.0137523	-0.0851054	0.014314	0.451	0.49275	1	0	Congruent	DD
ENSMUSG00000005583	Mef2c	0.0384576	0.00361313	-0.0997126	0.00637305	0.395	0.3375	1	0	0.229227	0.222903	-0.0362309	0.0261613	0.627	0.66575	1	0	Congruent	DD
ENSMUSG00000005610	Eif4g2	0.00630001	0.0051599	0.042568	0.004766	0.223	0.183	1	0	0.170237	0.125538	0.0132857	0.00655996	0.219	0.20025	1	0	Congruent	UU
ENSMUSG00000005625	Psmd4	0.00146776	9.81941e-05	0.0467949	0.00194962	0.138	0.104	1	0	0.0406493	0.0569678	0.0371938	0.00525131	0.137	0.11575	1	0	Congruent	UU
ENSMUSG00000005698	Ctcf	0.446346	0.0914262	-0.0356227	0.00266587	0.159	0.1665	1	0	0.583564	0.316103	-0.00508522	0.0159976	0.184	0.1845	1	0	Congruent	DD
ENSMUSG00000005705	Agrp	1.40126e-14	1.95887e-14	0.172726	0.00768832	0.214	0.1195	3.48018e-10	4.86506e-10	2.60944e-10	2.62845e-10	0.104066	0.00306287	0.177	0.1115	7.4776e-06	7.53208e-06	Congruent	UU
ENSMUSG00000005871	Apc	1.23927e-12	1.63094e-12	-0.197547	0.0127982	0.648	0.756	3.07785e-08	4.0506e-08	3.11362e-11	3.49299e-11	-0.168122	0.0154248	0.716	0.7925	8.92238e-07	1.00095e-06	Congruent	DD
ENSMUSG00000005873	Reep5	0.795186	0.0950634	-0.0937778	0.00501298	0.21	0.195	1	0	0.466778	0.331286	-0.0389279	0.0242445	0.18	0.1845	1	0	Congruent	DD
ENSMUSG00000005881	Ergic3	0.00357939	0.00131433	0.0408537	0.00195336	0.122	0.092	1	0	0.00130379	0.00223106	0.0523851	0.0115892	0.116	0.0835	0.758991	0.482019	Congruent	UU
ENSMUSG00000005886	Ncoa2	2.12753e-06	2.87312e-06	-0.150324	0.00938497	0.503	0.589	0.0528394	0.0713567	5.15146e-06	9.47182e-06	-0.116549	0.0101235	0.624	0.689	0.14762	0.271424	Congruent	DD
ENSMUSG00000005893	Nr2c2	0.168155	0.0441688	0.00277346	0.00470473	0.284	0.2585	1	0	0.00285675	0.00291996	0.0444032	0.014615	0.34	0.2905	0.877118	0.245764	Congruent	UU
ENSMUSG00000005899	Smpd4	0.000114741	0.000115859	0.0766172	0.00623124	0.23	0.1785	0.907516	0.130793	0.000121323	0.00024183	0.0746695	0.0172175	0.222	0.16775	0.258778	0.494181	Congruent	UU
ENSMUSG00000005986	Ankrd13d	0.0012256	0.00129614	0.0672757	0.00712557	0.169	0.131	1	0	1.56393e-12	1.88613e-12	0.128609	0.0083673	0.179	0.10625	4.48159e-08	5.40491e-08	Congruent	UU
ENSMUSG00000006005	Tpr	0.00413971	0.00162552	0.0508015	0.00238443	0.298	0.252	1	0	0.0156354	0.0240091	0.0518424	0.0123968	0.32	0.28475	1	0	Congruent	UU
ENSMUSG00000006010	Odr4	0.0416971	0.000373118	0.0221744	0	0.113	0.092	1	0	0.0151221	0.0163118	0.0279932	0.00607574	0.127	0.10275	1	0	Congruent	UU
ENSMUSG00000006024	Napa	0.298415	0.0374292	0.00897225	0.00195804	0.111	0.0995	1	0	0.000474415	0.00042228	0.0443492	0.0057648	0.115	0.08375	1	0	Congruent	UU
ENSMUSG00000006057	Atp5g1	2.93759e-13	3.24844e-13	0.148606	0.00336125	0.203	0.1145	7.29581e-09	8.06782e-09	1.40413e-06	2.68786e-06	0.0872591	0.00736743	0.165	0.11275	0.0402366	0.0770235	Congruent	UU
ENSMUSG00000006127	Inpp5k	0.014094	0.00614784	0.0280691	0.0010021	0.101	0.078	1	0	0.0070424	0.00897951	0.0340056	0.00537013	0.107	0.08225	1	0	Congruent	UU
ENSMUSG00000006169	Clint1	0.264184	0.0305529	-0.00614943	0.000456745	0.162	0.146	1	0	0.499136	0.295959	-0.0111087	0.0105743	0.197	0.18625	1	0	Congruent	DD
ENSMUSG00000006191	Cdkal1	0.344663	0.193628	-0.0200281	0.0108296	0.326	0.3	1	0	0.338604	0.282662	-0.0608508	0.0138781	0.363	0.36925	1	0	Congruent	DD
ENSMUSG00000006262	Mob1b	0.935854	0.0736239	-0.014108	0	0.126	0.1265	1	0	0.696185	0.232537	-0.00150569	0.00586915	0.153	0.14775	1	0	Congruent	DD
ENSMUSG00000006273	Atp6v1b2	0.00131859	0.000361803	0.0596495	0.000424263	0.261	0.215	1	0	1.35672e-10	2.68998e-10	0.14318	0.015796	0.332	0.23725	3.88783e-06	7.7084e-06	Congruent	UU
ENSMUSG00000006276	Eps15l1	0.170628	0.0069621	0.012194	0.00741623	0.266	0.244	1	0	0.0213958	0.0126029	0.0415583	0.0096629	0.287	0.256	1	0	Congruent	UU
ENSMUSG00000006299	Aamp	0.000133849	5.56804e-05	0.0404881	0.00347409	0.119	0.0805	1	0	2.41622e-08	4.64807e-08	0.0793145	0.00637535	0.108	0.05875	0.000692392	0.00133195	Congruent	UU
ENSMUSG00000006304	Arpc2	4.95804e-06	5.17517e-06	0.09453	0.0102959	0.272	0.205	0.123138	0.128531	9.16521e-07	8.0277e-07	0.0902934	0.00505015	0.267	0.2065	0.0262638	0.0230042	Congruent	UU
ENSMUSG00000006315	Tmem147	0.000223981	0.000200053	0.059226	0.00388625	0.141	0.1	1	0	0.000963382	0.00183944	0.0476092	0.00871833	0.111	0.07825	0.767176	0.343444	Congruent	UU
ENSMUSG00000006373	Pgrmc1	8.09737e-15	3.09536e-15	0.127631	0.001486	0.177	0.0895	2.01106e-10	7.68763e-11	7.45595e-06	1.15954e-05	0.0624837	0.00637113	0.143	0.0985	0.213658	0.332277	Congruent	UU
ENSMUSG00000006418	Rnf114	0.186827	0.0366716	0.00991584	0.00145561	0.122	0.107	1	0	0.290637	0.260681	0.0125343	0.00651864	0.113	0.102	1	0	Congruent	UU
ENSMUSG00000006435	Neurl1a	7.01622e-06	6.06417e-06	0.0847833	0.00338998	0.172	0.1205	0.174255	0.15061	0.0124643	0.0205511	0.0455371	0.00944625	0.167	0.138	1	0	Congruent	UU
ENSMUSG00000006527	Sfmbt1	0.707242	0.205056	-0.0276835	0.00689577	0.177	0.1795	1	0	0.505791	0.179304	-0.0178076	0.00603203	0.193	0.182	1	0	Congruent	DD
ENSMUSG00000006575	Rundc3a	0.00356768	0.00157777	0.0471836	0.00146397	0.136	0.1045	1	0	5.2277e-08	6.12073e-08	0.0759044	0.00652332	0.148	0.095	0.00149805	0.00175396	Congruent	UU
ENSMUSG00000006576	Slc4a3	1.53467e-18	5.86689e-19	0.232941	0.000845186	0.346	0.2215	3.8115e-14	1.4571e-14	2.36227e-13	4.52389e-13	0.167309	0.00771816	0.345	0.247	6.76933e-09	1.29637e-08	Congruent	UU
ENSMUSG00000006586	Runx1t1	0.608751	0.18334	0.0279555	0.00322319	0.638	0.6775	1	0	0.336948	0.31963	0.0556484	0.0270902	0.718	0.73525	1	0	Congruent	UU
ENSMUSG00000006599	Gtf2h1	0.642665	0.038122	0.00797844	0.0112832	0.1	0.101	1	0	0.0844508	0.0664677	0.0124271	0.00430643	0.126	0.107	1	0	Congruent	UU
ENSMUSG00000006651	Aplp1	0.00162055	0.00205594	-0.406033	0.0096527	0.554	0.556	1	0	0.557831	0.31707	-0.0437381	0.0295318	0.486	0.45275	1	0	Congruent	DD
ENSMUSG00000006673	Qrich1	0.125234	0.0390498	0.0126395	0.00256455	0.338	0.311	1	0	0.00265564	0.0037393	0.0549909	0.00737667	0.365	0.31475	1	0	Congruent	UU
ENSMUSG00000006676	Usp19	1.70091e-05	1.32623e-05	0.0793149	0.00489703	0.229	0.1705	0.422438	0.329381	5.55366e-14	1.04782e-13	0.145604	0.00774479	0.235	0.148	1.59146e-09	3.00263e-09	Congruent	UU
ENSMUSG00000006699	Cdc42	0.00618195	0.00492798	0.0375265	0.00711452	0.298	0.2545	1	0	0.000134062	0.000154752	0.069616	0.0102846	0.33	0.27275	0.579258	0.487881	Congruent	UU
ENSMUSG00000006728	Cdk4	0.0462822	0.0189694	0.0231243	0.00344393	0.112	0.091	1	0	5.5419e-05	8.15288e-05	0.0483999	0.00876574	0.1	0.064	0.506422	0.569934	Congruent	UU
ENSMUSG00000006782	Cnp	0.0220069	0.0191241	-0.0844195	0.00452993	0.086	0.1065	1	0	0.000880306	0.000681583	-0.0546622	0.00640683	0.088	0.11825	1	0	Congruent	DD
ENSMUSG00000006818	Sod2	0.0012704	0.00050129	0.0697152	0.000465498	0.193	0.1535	1	0	0.00375754	0.0022628	0.0373775	0.00299504	0.22	0.1835	1	0	Congruent	UU
ENSMUSG00000006920	Ezh1	0.128503	0.0402352	0.0211589	0.00247067	0.107	0.092	1	0	0.33454	0.44048	0.00972044	0.014177	0.102	0.091	1	0	Congruent	UU
ENSMUSG00000006930	Hap1	2.74607e-15	1.59766e-16	0.16474	0.000983267	0.187	0.098	6.82013e-11	3.96795e-12	1.21213e-16	2.21132e-16	0.176766	0.00625994	0.204	0.11375	3.47349e-12	6.33677e-12	Congruent	UU
ENSMUSG00000006932	Ctnnb1	2.14091e-08	3.79772e-09	0.103789	0.000951179	0.187	0.121	0.000531717	9.43202e-05	2.162e-07	4.27097e-07	0.0985022	0.0086872	0.182	0.122	0.00619543	0.0122389	Congruent	UU
ENSMUSG00000006998	Psmd2	1.13922e-05	1.17127e-05	0.0745711	0.002517	0.123	0.0795	0.282936	0.290897	6.36702e-08	1.22283e-07	0.0756152	0.00718836	0.128	0.0765	0.00182453	0.00350415	Congruent	UU
ENSMUSG00000007036	Abhd16a	0.00398496	0.00337785	0.0527203	0.00768832	0.144	0.112	1	0	0.0436617	0.0777444	0.0353913	0.0111364	0.12	0.0975	1	0	Congruent	UU
ENSMUSG00000007411	Mark3	0.000234102	0.000141434	0.0762431	0.00489903	0.468	0.406	1	0	0.519111	0.307352	0.0100807	0.0131035	0.553	0.55325	1	0	Congruent	UU
ENSMUSG00000007617	Homer1	7.29044e-17	6.8611e-17	0.408156	0.00373541	0.81	0.825	1.81065e-12	1.70402e-12	0.25288	0.232043	0.0921487	0.0173058	0.828	0.84325	1	0	Congruent	UU
ENSMUSG00000007656	Arpp19	1.2796e-20	7.82291e-21	0.262744	0.0016434	0.355	0.221	3.17801e-16	1.9429e-16	2.25364e-06	3.04141e-06	0.108982	0.00573897	0.35	0.28475	0.0645802	0.0871545	Congruent	UU
ENSMUSG00000007659	Bcl2l1	4.47889e-07	5.89481e-07	-0.187549	0.0161324	0.106	0.1585	0.0111238	0.0146403	0.0084153	0.00794003	-0.0723377	0.00998054	0.133	0.15975	1	0	Congruent	DD
ENSMUSG00000007670	Khsrp	0.015634	0.00353599	0.041768	0.00460977	0.172	0.1425	1	0	1.95397e-09	3.05196e-09	0.098769	0.00834427	0.174	0.111	5.5993e-05	8.74568e-05	Congruent	UU
ENSMUSG00000007739	Cct4	0.0653116	0.0212998	0.0287406	0.000494613	0.106	0.088	1	0	0.106405	0.131505	0.016991	0.00733564	0.111	0.09425	1	0	Congruent	UU
ENSMUSG00000007783	Cpt1c	3.12054e-06	2.40375e-06	0.130171	0.00437829	0.541	0.4785	0.0775018	0.0596996	1.12531e-48	2.25062e-48	0.383018	0.017378	0.522	0.3165	3.22469e-44	6.44937e-44	Congruent	UU
ENSMUSG00000007815	Rhoa	0.136826	0.0521303	0.00330197	0.00280387	0.148	0.1285	1	0	0.148672	0.175935	0.0136828	0.0129277	0.159	0.1405	1	0	Congruent	UU
ENSMUSG00000007867	Ift43	0.00665637	0.00169583	-0.0704842	0.00414973	0.103	0.13	1	0	0.299861	0.253055	-0.0323284	0.0163981	0.112	0.11925	1	0	Congruent	DD
ENSMUSG00000007880	Arid1a	0.000423637	2.59311e-05	0.038955	0.00113961	0.324	0.2615	1	0	0.253821	0.266465	0.0065392	0.0154931	0.32	0.29475	1	0	Congruent	UU
ENSMUSG00000007892	Rplp1	1.04985e-15	4.446e-16	0.176162	0.00359697	0.338	0.215	2.60741e-11	1.10421e-11	7.53914e-10	1.50767e-09	0.154425	0.0179622	0.307	0.21425	2.16042e-05	4.32039e-05	Congruent	UU
ENSMUSG00000007908	Hmgcll1	4.26184e-07	3.69284e-07	0.116696	0.000393345	0.344	0.2675	0.0105847	0.00917155	0.00280957	0.00461083	0.0592182	0.0224251	0.387	0.33425	0.829954	0.340092	Congruent	UU
ENSMUSG00000007989	Fzd3	7.89886e-09	9.8705e-09	0.144726	0.00535976	0.258	0.1825	0.000196176	0.000245144	5.30233e-05	5.46323e-05	0.0735463	0.0131037	0.242	0.1905	0.646152	0.46969	Congruent	UU
ENSMUSG00000008140	Emc10	0.0152163	0.00287294	0.0254437	0.00218679	0.202	0.1675	1	0	0.0671651	0.0966102	0.0413799	0.0124742	0.176	0.15175	1	0	Congruent	UU
ENSMUSG00000008153	Clstn3	1.64206e-08	1.1301e-08	0.118465	0.00219905	0.272	0.194	0.000407823	0.000280672	3.53797e-05	6.37673e-05	0.100978	0.00937996	0.254	0.201	0.326545	0.463998	Congruent	UU
ENSMUSG00000008206	Cers4	0.0171757	0.00499985	0.0386178	0.00144393	0.139	0.113	1	0	0.0131931	0.0198592	0.0507565	0.00669843	0.136	0.1105	1	0	Congruent	UU
ENSMUSG00000008305	Tle1	0.0013525	0.0010447	0.0474002	0.000376505	0.32	0.264	1	0	0.016799	0.0129441	0.0388667	0.0068864	0.331	0.293	1	0	Congruent	UU
ENSMUSG00000008348	Ubc	5.40673e-07	3.38012e-07	0.0942812	0.00264971	0.225	0.158	0.0134282	0.00839487	6.61969e-13	1.13796e-12	0.156944	0.0128912	0.236	0.15025	1.89694e-08	3.26095e-08	Congruent	UU
ENSMUSG00000008398	Elk3	6.19793e-08	4.70809e-08	0.0908602	0.000997204	0.144	0.087	0.00153932	0.0011693	0.0347107	0.0387034	0.0374163	0.0074024	0.12	0.09825	1	0	Congruent	UU
ENSMUSG00000008429	Herpud2	0.222381	0.0200113	-0.0498331	0.000923621	0.126	0.1375	1	0	0.641618	0.182423	-0.0109548	0.00551049	0.166	0.159	1	0	Congruent	DD
ENSMUSG00000008489	Elavl2	0.057218	0.0460151	-0.204822	0.0119961	0.123	0.1415	1	0	0.0185417	0.0139002	-0.191896	0.0148109	0.142	0.1635	1	0	Congruent	DD
ENSMUSG00000008575	Nfib	4.65129e-11	1.1915e-11	-0.299989	0.00808405	0.135	0.215	1.1552e-06	2.9592e-07	2.08635e-06	4.14876e-06	-0.14762	0.0438009	0.287	0.374	0.0597865	0.118887	Congruent	DD
ENSMUSG00000008604	Ubqln4	0.00384129	0.00198622	0.043573	0.00201808	0.105	0.078	1	0	0.000120745	0.000207243	0.0575231	0.00667524	0.11	0.07375	0.52192	0.552468	Congruent	UU
ENSMUSG00000008658	Rbfox1	2.11588e-29	1.71923e-29	0.369144	0.00354691	0.984	0.976	5.255e-25	4.26989e-25	0.00849295	0.0100993	0.0786818	0.03341	0.991	0.98675	0.754225	0.491551	Congruent	UU
ENSMUSG00000008682	Rpl10	0.00061536	0.000818474	0.054959	0.011039	0.157	0.114	0.954634	0.0641567	0.00370977	0.00381038	0.0530757	0.00945884	0.142	0.11225	1	0	Congruent	UU
ENSMUSG00000008892	Vdac3	0.0124313	0.00311165	0.028348	0.00341429	0.129	0.1015	1	0	0.00303488	0.00306508	0.03597	0.00308493	0.134	0.10375	1	0	Congruent	UU
ENSMUSG00000009013	Dynll1	1.24999e-07	2.36094e-08	0.113779	0.00326445	0.2	0.1355	0.00310449	0.000586364	0.000180851	0.000219019	0.0688371	0.0119078	0.165	0.12225	0.521358	0.552993	Congruent	UU
ENSMUSG00000009035	Tmem184b	0.00822515	0.00549293	0.0304773	0.00150205	0.102	0.0765	1	0	0.0016055	0.0022214	0.0379618	0.00720964	0.106	0.078	1	0	Congruent	UU
ENSMUSG00000009073	Nf2	0.0744362	0.039613	0.0189304	0.00192479	0.12	0.1	1	0	0.102905	0.106979	0.0734172	0.012693	0.134	0.11525	1	0	Congruent	UU
ENSMUSG00000009090	Ap1b1	0.0454984	0.0175628	0.0184555	0.00281418	0.158	0.134	1	0	0.0177747	0.0177422	0.0291196	0.00959993	0.175	0.1465	1	0	Congruent	UU
ENSMUSG00000009291	Pttg1ip	0.179619	0.0708255	0.02989	0.00388255	0.128	0.1135	1	0	7.85323e-05	5.29099e-05	0.0551884	0.00504948	0.141	0.10225	0.76317	0.47366	Congruent	UU
ENSMUSG00000009418	Nav1	0.132576	0.0207374	-0.103451	0.00316868	0.251	0.262	1	0	0.0305514	0.0436691	-0.109376	0.033544	0.257	0.28325	1	0	Congruent	DD
ENSMUSG00000009470	Tnpo1	0.0130686	0.00955375	0.0389599	0.00223388	0.342	0.299	1	0	0.0137651	0.0226131	0.0312774	0.0167122	0.388	0.338	1	0	Congruent	UU
ENSMUSG00000009535	Rnmt	0.0140223	0.00143264	0.0390906	0.000487289	0.131	0.105	1	0	0.175225	0.156009	0.0187392	0.00849723	0.133	0.11825	1	0	Congruent	UU
ENSMUSG00000009555	Cdk9	0.00070984	0.000144547	0.0712261	0	0.167	0.1285	1	0	1.27387e-15	1.52418e-15	0.134114	0.00490903	0.189	0.106	3.6504e-11	4.36768e-11	Congruent	UU
ENSMUSG00000009569	Mrtfb	6.50713e-09	5.88354e-09	0.162199	0.00511582	0.768	0.757	0.000161611	0.000146124	0.000347885	0.000607026	0.0797851	0.0163783	0.819	0.80975	0.636693	0.420551	Congruent	UU
ENSMUSG00000009575	Cbx5	0.0851029	0.0267803	0.0126767	0.000461706	0.163	0.141	1	0	0.0204691	0.0170119	0.0437536	0.0149682	0.188	0.15925	1	0	Congruent	UU
ENSMUSG00000009681	Bcr	9.72377e-18	1.25377e-17	0.24283	0.00652094	0.413	0.2835	2.41499e-13	3.11385e-13	1.13566e-06	1.55236e-06	0.125791	0.0222722	0.408	0.3325	0.0325435	0.0444843	Congruent	UU
ENSMUSG00000009739	Pou6f1	0.0170316	0.00637349	0.0426318	0.00191216	0.15	0.123	1	0	0.00125665	0.00141715	0.0549841	0.00765063	0.144	0.11175	1	0	Congruent	UU
ENSMUSG00000009741	Ubp1	0.0038384	0.00254822	0.0573763	0.00363399	0.301	0.2555	1	0	9.45253e-08	8.93627e-08	0.113161	0.0156959	0.327	0.25475	0.00270872	0.00256078	Congruent	UU
ENSMUSG00000009828	Cilk1	9.26175e-05	5.5629e-05	-0.0872941	0.00640161	0.078	0.115	1	0	0.0503921	0.0501631	-0.0393166	0.0166209	0.093	0.11075	1	0	Congruent	DD
ENSMUSG00000009863	Sdhb	3.5491e-09	4.66792e-09	0.0967805	0.00434822	0.179	0.108	8.81455e-05	0.000115933	0.0144925	0.0238652	0.0501544	0.0128477	0.161	0.13	1	0	Congruent	UU
ENSMUSG00000009894	Snap47	0.0520713	0.0214306	0.0395759	0.00148025	0.119	0.099	1	0	0.033419	0.0442439	0.023833	0.00755556	0.125	0.10175	1	0	Congruent	UU
ENSMUSG00000009905	Kdsr	0.0258736	0.0026526	0.031813	0	0.134	0.1095	1	0	0.0055756	0.00915066	0.0436536	0.00946312	0.141	0.109	0.994379	0.0112411	Congruent	UU
ENSMUSG00000009907	Vps4b	0.557771	0.235444	-0.0206533	0.00598594	0.137	0.143	1	0	0.655161	0.298357	-0.0183546	0.0136733	0.182	0.176	1	0	Congruent	DD
ENSMUSG00000009927	Rps25	2.43541e-07	4.27659e-08	0.0814697	0.000971561	0.156	0.098	0.00604859	0.00106213	0.000434371	0.000718109	0.0503753	0.00759641	0.125	0.0905	0.888745	0.208847	Congruent	UU
ENSMUSG00000009995	Tafazzin	0.101633	0.0450137	0.0240712	0.00235109	0.153	0.133	1	0	0.0026738	0.00394879	0.0439992	0.00976512	0.161	0.12625	1	0	Congruent	UU
ENSMUSG00000010066	Cacna2d2	7.58031e-09	1.01927e-08	0.130148	0.0121671	0.28	0.1945	0.000188265	0.000253146	0.000272432	0.000310865	0.0875088	0.0160525	0.224	0.17875	0.843598	0.312804	Congruent	UU
ENSMUSG00000010086	Rnf112	1.46353e-24	1.89343e-24	0.264761	0.0024415	0.389	0.235	3.63483e-20	4.70253e-20	5.27464e-27	1.04134e-26	0.276093	0.0123511	0.402	0.2595	1.5115e-22	2.98407e-22	Congruent	UU
ENSMUSG00000010095	Slc3a2	0.0173192	0.00216689	0.0396308	0.001457	0.124	0.0995	1	0	0.0202015	0.0286345	0.0326114	0.00480828	0.134	0.10875	1	0	Congruent	UU
ENSMUSG00000010110	Stx5a	0.497912	0.14743	-0.0353361	0.00359046	0.151	0.1575	1	0	0.698963	0.158874	-0.00246729	0.00264106	0.17	0.165	1	0	Congruent	DD
ENSMUSG00000010277	2610507B11Rik	0.000388511	1.23744e-05	0.0668951	0.00127971	0.254	0.204	1	0	1.55988e-08	3.10409e-08	0.125552	0.0153388	0.264	0.18625	0.000447	0.000889508	Congruent	UU
ENSMUSG00000010517	Faf1	0.00230119	0.00204794	-0.0765674	0.00721772	0.697	0.779	1	0	0.00377515	0.00688624	-0.0728271	0.0167605	0.778	0.8295	1	0	Congruent	DD
ENSMUSG00000010608	Rbm25	2.65881e-10	3.60998e-10	-0.189413	0.0129864	0.601	0.7015	6.60343e-06	8.96574e-06	0.000559316	0.000658366	-0.0963386	0.0062333	0.703	0.7385	1	0	Congruent	DD
ENSMUSG00000010721	Lmbr1	0.558636	0.00362736	-0.0292744	0.000422505	0.201	0.207	1	0	0.394262	0.0933965	-0.0102452	0.00191865	0.247	0.23225	1	0	Congruent	DD
ENSMUSG00000011257	Pabpc4	2.01838e-06	1.65589e-07	0.0992334	0.00387968	0.259	0.193	0.0501284	0.00411257	3.48691e-17	6.95231e-17	0.180691	0.01119	0.275	0.16825	9.99208e-13	1.99225e-12	Congruent	UU
ENSMUSG00000011306	Sugp1	0.334315	0.149461	0.00439063	0.00334707	0.132	0.1195	1	0	0.0833189	0.0877796	0.0216252	0.0123474	0.154	0.1315	1	0	Congruent	UU
ENSMUSG00000011751	Sptbn4	1.6745e-11	2.27666e-11	0.209856	0.01108	0.589	0.5155	4.15878e-07	5.65431e-07	2.07238e-09	2.70696e-09	0.160402	0.0148565	0.571	0.49725	5.9386e-05	7.75705e-05	Congruent	UU
ENSMUSG00000011752	Pgam1	1.23058e-06	1.15648e-06	0.070237	0.00253199	0.116	0.0695	0.0305627	0.0287224	0.00011074	0.000103276	0.0518492	0.00677452	0.114	0.08	0.78296	0.43408	Congruent	UU
ENSMUSG00000011831	Evi5	0.028515	0.00851604	0.0391858	0.00156044	0.303	0.267	1	0	0.0808228	0.0769143	0.0290908	0.0166484	0.317	0.28675	1	0	Congruent	UU
ENSMUSG00000011832	Evi5l	0.27478	0.174641	-0.039272	0.00547972	0.126	0.1365	1	0	0.566622	0.148804	-0.00776509	0.0129349	0.141	0.13875	1	0	Congruent	DD
ENSMUSG00000012076	Brms1l	0.519948	0.0824834	0.00631849	0.00141391	0.141	0.134	1	0	0.271095	0.200035	0.00636978	0.00816472	0.166	0.15125	1	0	Congruent	UU
ENSMUSG00000012609	Ttll5	5.74618e-06	3.29975e-06	-0.212142	0.00702145	0.172	0.2215	0.142712	0.0819526	8.47648e-07	1.64973e-06	-0.218947	0.0386829	0.186	0.243	0.0242902	0.0472745	Congruent	DD
ENSMUSG00000012848	Rps5	0.00203568	0.000213204	0.0339232	0.000490334	0.118	0.0855	1	0	0.178039	0.216769	0.0265925	0.0260399	0.111	0.09225	1	0	Congruent	UU
ENSMUSG00000013033	Adgrl1	8.50381e-21	4.17882e-21	0.244909	0.00231587	0.425	0.2835	2.11201e-16	1.03785e-16	3.04104e-19	3.17316e-19	0.226487	0.00464359	0.387	0.2735	8.71439e-15	9.09301e-15	Congruent	UU
ENSMUSG00000013150	Gfod2	0.0160161	0.00320502	0.0679248	0.00242256	0.104	0.0815	1	0	0.00558008	0.00420179	0.0762514	0.00956586	0.103	0.07975	1	0	Congruent	UU
ENSMUSG00000013160	Atp6v0d1	0.000323268	9.89028e-05	0.0617379	0.000477035	0.163	0.1215	1	0	0.00415498	0.00559439	0.0347206	0.00641551	0.154	0.123	1	0	Congruent	UU
ENSMUSG00000013236	Ptprs	0.761352	0.100138	0.0125646	0.00254929	0.553	0.57	1	0	4.35643e-21	7.93618e-21	0.268524	0.0119757	0.596	0.47325	1.24838e-16	2.27419e-16	Congruent	UU
ENSMUSG00000013523	Bcas1	1.00334e-20	1.28376e-20	-0.298455	0.00961269	0.053	0.144	2.49188e-16	3.18836e-16	7.08497e-16	1.41458e-15	-0.234924	0.0207109	0.064	0.14	2.03027e-11	4.05362e-11	Congruent	DD
ENSMUSG00000013539	Tango2	0.0428576	0.0367293	0.0301208	0.00806793	0.197	0.1685	1	0	0.519908	0.302626	0.010595	0.0101186	0.181	0.17325	1	0	Congruent	UU
ENSMUSG00000013593	Ndufs2	0.00903963	0.00236147	0.0387673	0.00147526	0.125	0.098	1	0	0.000238555	0.000326907	0.0507029	0.00786717	0.128	0.09	0.568563	0.505695	Congruent	UU
ENSMUSG00000013662	Atad1	0.0217942	0.020259	0.030118	0.00576727	0.207	0.174	1	0	0.0814889	0.0682345	0.0268155	0.00824226	0.231	0.208	1	0	Congruent	UU
ENSMUSG00000013787	Ehmt2	0.00221081	0.00180481	0.0422619	0.00284294	0.163	0.1255	1	0	2.17291e-05	3.3572e-05	0.0657066	0.00743503	0.149	0.10575	0.360033	0.448767	Congruent	UU
ENSMUSG00000013858	Tmem259	0.0398328	0.00576036	0.0323069	0.00048636	0.128	0.1065	1	0	0.00181831	0.00327867	0.0453673	0.00952588	0.118	0.08675	1	0	Congruent	UU
ENSMUSG00000013997	Nit1	1.7138e-06	1.03239e-06	0.0783016	0.00141653	0.18	0.122	0.0425639	0.0256403	7.12772e-16	1.41525e-15	0.134492	0.0056343	0.195	0.10725	2.04252e-11	4.05553e-11	Congruent	UU
ENSMUSG00000014039	Prdm15	0.0204108	0.0230694	0.0341619	0.00655068	0.101	0.0775	1	0	0.183661	0.190045	0.0153099	0.0105455	0.113	0.09775	1	0	Congruent	UU
ENSMUSG00000014164	Klhl3	1.13411e-06	5.81813e-07	0.107768	0.00398925	0.247	0.1825	0.0281669	0.0144499	2.06396e-05	2.05597e-05	0.0925964	0.00934471	0.295	0.239	0.507129	0.455904	Congruent	UU
ENSMUSG00000014195	Dnajc7	0.00794	0.00108412	0.0400429	0.00289167	0.273	0.2315	1	0	0.00432361	0.00447115	0.0375103	0.0112533	0.303	0.2585	1	0	Congruent	UU
ENSMUSG00000014313	Cox6c	3.90276e-12	4.09601e-12	0.158268	0.00301625	0.277	0.18	9.6929e-08	1.01728e-07	3.95064e-18	7.36643e-18	0.205755	0.0137043	0.267	0.161	1.1321e-13	2.11092e-13	Congruent	UU
ENSMUSG00000014355	Anapc1	0.0815869	0.0218155	0.0124573	0.00288001	0.257	0.2275	1	0	0.0605524	0.055607	0.019856	0.00562444	0.282	0.254	1	0	Congruent	UU
ENSMUSG00000014496	Ankrd28	5.42817e-13	4.66648e-13	-0.311282	0.0141647	0.562	0.6535	1.34814e-08	1.15897e-08	2.46329e-09	2.07222e-09	-0.23718	0.0105974	0.645	0.705	7.0588e-05	5.93816e-05	Congruent	DD
ENSMUSG00000014547	Wdfy2	0.00322512	0.00248652	-0.0761995	0.000937198	0.087	0.115	1	0	7.25097e-05	5.87993e-05	-0.0883835	0.0175554	0.093	0.131	0.751455	0.497091	Congruent	DD
ENSMUSG00000014554	Dguok	0.0612294	0.00941832	0.0218474	0.00139395	0.166	0.1425	1	0	0.000185958	0.000261249	0.0605436	0.00828962	0.178	0.13625	0.820761	0.358479	Congruent	UU
ENSMUSG00000014602	Kif1a	2.211e-05	2.72851e-05	0.0843347	0.0150632	0.355	0.2805	0.534975	0.657645	3.82932e-05	7.5582e-05	0.0935141	0.0163918	0.354	0.284	0.260827	0.493173	Congruent	UU
ENSMUSG00000014668	Chfr	0.00848083	0.00194182	0.0436343	0.00650809	0.281	0.241	1	0	0.0588503	0.057891	0.052589	0.0171213	0.311	0.28525	1	0	Congruent	UU
ENSMUSG00000014763	Fam120b	0.281317	0.0901218	0.00534738	0.00578741	0.195	0.1785	1	0	0.0736072	0.111589	0.0416257	0.0216052	0.24	0.20875	1	0	Congruent	UU
ENSMUSG00000014769	Psmb1	0.0340672	0.0256449	0.0393609	0.00521569	0.154	0.1285	1	0	0.0320147	0.0406913	0.024425	0.013609	0.154	0.128	1	0	Congruent	UU
ENSMUSG00000014786	Slc9a5	4.33996e-05	2.43381e-05	0.0643511	0.00204539	0.108	0.07	0.825226	0.247167	0.00155179	0.00168851	0.0448282	0.00641644	0.106	0.0775	0.902433	0.195133	Congruent	UU
ENSMUSG00000014850	Msh3	0.889805	0.0677737	-0.0152645	0.00357944	0.17	0.1655	1	0	0.108387	0.102393	-0.0477497	0.0137636	0.168	0.18625	1	0	Congruent	DD
ENSMUSG00000014956	Ppp1cb	2.88015e-05	1.09224e-05	0.0794159	0.00430803	0.262	0.2025	0.715314	0.271269	0.00324624	0.0056466	0.0678529	0.024582	0.302	0.25475	0.75374	0.492521	Congruent	UU
ENSMUSG00000015087	Rabl6	0.0221772	0.0266899	0.0269009	0.0161863	0.244	0.2055	1	0	0.146932	0.239451	0.0218064	0.0224197	0.267	0.2395	1	0	Congruent	UU
ENSMUSG00000015090	Ptgds	7.50214e-23	7.05333e-23	-1.02443	0.0321871	0.098	0.212	1.86323e-18	1.75177e-18	1.81617e-20	2.34286e-20	-0.367352	0.0512495	0.109	0.213	5.20442e-16	6.7137e-16	Congruent	DD
ENSMUSG00000015092	Edf1	0.000744113	0.000951584	0.0571942	0.00849913	0.116	0.0815	1	0	0.0135206	0.0196419	0.0315776	0.00688529	0.1	0.0765	1	0	Congruent	UU
ENSMUSG00000015094	Npdc1	8.14257e-06	8.98526e-06	0.0854688	0.00368948	0.192	0.1365	0.202229	0.223158	1.05733e-06	1.91075e-06	0.0950068	0.013902	0.187	0.131	0.0302988	0.0547545	Congruent	UU
ENSMUSG00000015112	Slc25a13	0.000455557	0.000392649	-0.0877503	0.00519396	0.073	0.105	1	0	0.0961223	0.0632887	-0.0456907	0.00936939	0.1	0.114	1	0	Congruent	DD
ENSMUSG00000015143	Actn1	4.03939e-35	1.02016e-35	0.367783	0.0021439	0.492	0.3005	1.00322e-30	2.53366e-31	3.24828e-17	6.41564e-17	0.25073	0.0313276	0.45	0.326	9.30828e-13	1.83846e-12	Congruent	UU
ENSMUSG00000015149	Sirt2	0.295573	0.00880442	-0.0430681	0.00184641	0.113	0.121	1	0	0.816342	0.210158	-0.0108527	0.00959633	0.12	0.1175	1	0	Congruent	DD
ENSMUSG00000015165	Hnrnpl	0.230669	0.125621	0.00703235	0.00829386	0.248	0.227	1	0	5.21466e-05	5.17403e-05	0.0693439	0.007984	0.272	0.21775	0.612875	0.474792	Congruent	UU
ENSMUSG00000015189	Casd1	0.0163553	0.0132352	0.0190605	0.0041385	0.172	0.14	1	0	0.0031638	0.00256433	0.0414128	0.0096065	0.174	0.1405	1	0	Congruent	UU
ENSMUSG00000015222	Map2	0.000469223	0.000135513	0.104237	0.000588712	0.833	0.8865	1	0	0.026701	0.022732	0.0640557	0.0120451	0.903	0.92125	1	0	Congruent	UU
ENSMUSG00000015291	Gdi1	3.09972e-05	5.60191e-06	0.0729979	0.00344351	0.249	0.191	0.769847	0.139129	3.42841e-06	5.96968e-06	0.108612	0.018743	0.248	0.185	0.0982445	0.171067	Congruent	UU
ENSMUSG00000015305	Sash1	0.0443648	0.0229505	-0.000596648	0.000843788	0.202	0.171	1	0	0.742558	0.164915	-0.00644833	0.0100993	0.199	0.1935	1	0	Congruent	DD
ENSMUSG00000015357	Clpx	0.0941247	0.00865824	0.0259486	0.000925716	0.163	0.1425	1	0	0.0397354	0.0601836	0.0231962	0.00934906	0.194	0.1665	1	0	Congruent	UU
ENSMUSG00000015377	Dennd6b	3.49063e-05	4.07559e-05	0.0878314	0.00391046	0.159	0.113	0.575595	0.600199	4.11869e-05	8.05497e-05	0.0699397	0.012588	0.16	0.113	0.269676	0.487817	Congruent	UU
ENSMUSG00000015476	Prrt1	2.50599e-08	2.72313e-08	0.11642	0.00574266	0.305	0.219	0.000622387	0.000676316	3.0061e-13	5.3373e-13	0.123263	0.00255064	0.259	0.16725	8.61427e-09	1.52946e-08	Congruent	UU
ENSMUSG00000015522	Arnt	0.204186	0.0576707	-0.0786634	0.00442752	0.22	0.2315	1	0	0.46291	0.241381	-0.0198959	0.0123412	0.27	0.25275	1	0	Congruent	DD
ENSMUSG00000015575	Atp6v0e	0.0797364	0.0110643	0.0189766	0.000473932	0.138	0.118	1	0	0.065766	0.0618539	0.017643	0.0111799	0.144	0.12275	1	0	Congruent	UU
ENSMUSG00000015597	Zfp318	1.12184e-07	6.27176e-08	0.0856006	0.000952067	0.181	0.1175	0.00278621	0.00155765	0.0505391	0.0854665	0.034941	0.0153102	0.171	0.14575	1	0	Congruent	UU
ENSMUSG00000015656	Hspa8	2.90049e-35	1.9052e-35	0.354388	0.00152716	0.449	0.259	7.20364e-31	4.73176e-31	4.25216e-33	5.0983e-33	0.291977	0.0076425	0.433	0.26725	1.2185e-28	1.46097e-28	Congruent	UU
ENSMUSG00000015697	Setdb1	0.000354775	0.000442099	0.0587388	0.0130371	0.29	0.234	1	0	1.10785e-05	1.70421e-05	0.0637372	0.0120477	0.298	0.23475	0.305162	0.46378	Congruent	UU
ENSMUSG00000015709	Arnt2	0.298327	0.022096	-0.0739546	0.00279874	0.209	0.217	1	0	0.108521	0.0974321	-0.0709766	0.00641324	0.244	0.25975	1	0	Congruent	DD
ENSMUSG00000015733	Capza2	0.125507	0.0279796	0.0286777	0.000460248	0.17	0.152	1	0	0.061133	0.0610833	0.0414664	0.00678688	0.194	0.17275	1	0	Congruent	UU
ENSMUSG00000015747	Vps45	0.279148	0.0195914	0.0121957	0.00148456	0.102	0.092	1	0	0.448082	0.260417	0.020387	0.00347105	0.122	0.115	1	0	Congruent	UU
ENSMUSG00000015757	Ppil4	0.00403752	0.00271362	0.0427176	0.00522784	0.163	0.1275	1	0	0.00129912	0.00121712	0.0473772	0.00198285	0.17	0.13525	1	0	Congruent	UU
ENSMUSG00000015829	Tnr	1.07403e-05	5.49649e-06	-0.192933	0.00453121	0.55	0.6505	0.266747	0.136511	0.452104	0.214112	-0.00320256	0.0298683	0.704	0.72325	1	0	Congruent	DD
ENSMUSG00000015837	Sqstm1	0.000359191	8.94723e-05	0.0577225	0.000498724	0.122	0.0865	1	0	0.0167341	0.0166162	0.0410353	0.0103315	0.142	0.117	1	0	Congruent	UU
ENSMUSG00000015843	Rxrg	2.52024e-08	1.03369e-08	0.0983385	0.00188131	0.19	0.1225	0.000625926	0.000256726	0.0226838	0.020103	0.0360296	0.0034094	0.157	0.13125	1	0	Congruent	UU
ENSMUSG00000015879	Fam184b	2.03458e-06	2.48529e-06	0.0924173	0.00651551	0.202	0.141	0.0505307	0.0617247	0.000832199	0.00107584	0.0564643	0.0103191	0.229	0.185	0.83114	0.33772	Congruent	UU
ENSMUSG00000015882	Lcorl	0.065153	0.0133547	-0.0124316	0.000357254	0.315	0.2775	1	0	0.633999	0.223492	-0.0470066	0.0260875	0.336	0.33125	1	0	Congruent	DD
ENSMUSG00000015961	Adss	0.269021	0.0313812	0.0155113	0.000450095	0.177	0.1625	1	0	6.90867e-05	0.000135445	0.0752022	0.011453	0.216	0.16275	0.27938	0.481783	Congruent	UU
ENSMUSG00000015968	Cacna1d	0.000309049	0.000315662	0.0924627	0.010273	0.878	0.92	1	0	5.18644e-08	1.00251e-07	0.136683	0.0236679	0.894	0.88525	0.00148623	0.00287281	Congruent	UU
ENSMUSG00000015981	Stk32c	1.63694e-07	1.82228e-07	0.103471	0.00599406	0.225	0.156	0.0040655	0.00452582	0.000170219	0.000231881	0.0700142	0.00686977	0.222	0.17625	0.747545	0.398934	Congruent	UU
ENSMUSG00000016018	Mtrex	0.17565	0.0277101	0.00439656	0.00621767	0.193	0.172	1	0	0.0117728	0.0117734	0.0403953	0.0114808	0.217	0.185	1	0	Congruent	UU
ENSMUSG00000016200	Syt14	8.75953e-07	1.08639e-06	0.140263	0.0106658	0.52	0.452	0.0217552	0.0269816	0.65014	0.159417	0.0132515	0.0135026	0.596	0.6135	1	0	Congruent	UU
ENSMUSG00000016308	Ube2a	0.526385	0.0280461	0.0114024	0.00147171	0.103	0.0965	1	0	0.0260554	0.0160642	0.0447754	0.00821699	0.113	0.09275	1	0	Congruent	UU
ENSMUSG00000016319	Slc25a5	4.50755e-13	6.22671e-13	0.154626	0.00805689	0.215	0.1245	1.1195e-08	1.54647e-08	2.20284e-14	4.2132e-14	0.163661	0.0201299	0.207	0.11725	6.31245e-10	1.20733e-09	Congruent	UU
ENSMUSG00000016346	Kcnq2	3.45609e-17	4.64626e-17	0.20632	0.00626495	0.363	0.236	8.58354e-13	1.15394e-12	1.73589e-12	3.47063e-12	0.158427	0.0121918	0.347	0.24475	4.97436e-08	9.94543e-08	Congruent	UU
ENSMUSG00000016349	Eef1a2	2.10539e-07	8.04782e-08	0.114979	0.00144666	0.182	0.1225	0.00522894	0.00199876	2.94374e-15	5.31523e-15	0.134693	0.00865271	0.202	0.11575	8.43558e-11	1.52313e-10	Congruent	UU
ENSMUSG00000016386	Mpped2	1.95344e-12	1.85384e-12	0.184606	0.00676125	0.483	0.364	4.85157e-08	4.60419e-08	0.0146493	0.0149087	0.0627878	0.0121321	0.59	0.56	1	0	Congruent	UU
ENSMUSG00000016427	Ndufa1	1.13729e-16	1.12566e-16	0.145895	0.00405824	0.152	0.067	2.82457e-12	2.7957e-12	2.20941e-07	3.19575e-07	0.0744826	0.00254278	0.102	0.0605	0.00633128	0.00915775	Congruent	UU
ENSMUSG00000016477	E2f3	0.502575	0.163914	-0.0201296	0.00282718	0.123	0.13	1	0	0.097354	0.0656145	-0.0354789	0.00532223	0.134	0.15125	1	0	Congruent	DD
ENSMUSG00000016481	Cr1l	0.135885	0.0491591	0.0168267	0.00244228	0.114	0.0975	1	0	0.344922	0.350321	0.010277	0.0103937	0.131	0.119	1	0	Congruent	UU
ENSMUSG00000016493	Cd46	0.729652	0.157331	0.0127912	0.00791351	0.154	0.15	1	0	0.343293	0.383772	0.00568663	0.0135771	0.161	0.14775	1	0	Congruent	UU
ENSMUSG00000016495	Plgrkt	0.33069	0.0917459	0.0129957	0.00291469	0.12	0.1095	1	0	0.0394864	0.0464121	0.030048	0.0167601	0.129	0.10475	1	0	Congruent	UU
ENSMUSG00000016534	Lamp2	0.0920383	0.020794	-0.0972737	0.0044752	0.182	0.197	1	0	0.397382	0.314255	-0.0438304	0.0256424	0.201	0.20625	1	0	Congruent	DD
ENSMUSG00000016541	Atxn10	0.0735852	0.0214685	0.0159582	0.00486167	0.263	0.232	1	0	0.0984448	0.0781849	0.00828961	0.0125592	0.316	0.28775	1	0	Congruent	UU
ENSMUSG00000016559	H3f3b	0.000183539	0.000173733	0.0588313	0.00521812	0.16	0.115	1	0	0.148003	0.165409	0.0160273	0.0082034	0.162	0.14325	1	0	Congruent	UU
ENSMUSG00000016933	Plcg1	2.67264e-05	5.96907e-06	0.0660254	0.00357161	0.219	0.1625	0.663777	0.148248	8.09583e-16	1.20052e-15	0.133788	0.00678982	0.205	0.116	2.31994e-11	3.44021e-11	Congruent	UU
ENSMUSG00000017119	Nbr1	0.00114302	0.00121015	0.0568669	0.00715005	0.256	0.2055	1	0	1.62543e-06	3.2417e-06	0.10214	0.00952467	0.257	0.1905	0.0465783	0.092894	Congruent	UU
ENSMUSG00000017132	Cyth1	1.08825e-06	1.0687e-06	-0.21122	0.00881584	0.162	0.2165	0.0270277	0.0265423	0.188442	0.148361	-0.0457936	0.016386	0.2	0.21525	1	0	Congruent	DD
ENSMUSG00000017167	Cntnap1	0.000723892	0.000828788	0.0652122	0.00583494	0.154	0.1155	1	0	9.40318e-08	1.55898e-07	0.0961028	0.0134382	0.144	0.0865	0.00269458	0.00446742	Congruent	UU
ENSMUSG00000017210	Med24	0.0647151	0.0359251	0.0320714	0.00390298	0.13	0.11	1	0	1.26035e-05	1.70559e-05	0.0707039	0.00818473	0.138	0.0945	0.350148	0.468292	Congruent	UU
ENSMUSG00000017264	Exosc10	0.126261	0.0371595	0.0161976	0.00383872	0.133	0.115	1	0	0.0798881	0.128158	0.020553	0.00851396	0.139	0.117	1	0	Congruent	UU
ENSMUSG00000017288	Vps53	0.0596662	0.0422913	0.0310751	0.00567008	0.15	0.1275	1	0	0.161501	0.247986	0.020939	0.0136564	0.158	0.138	1	0	Congruent	UU
ENSMUSG00000017291	Taok1	0.0339608	0.00841476	0.0122833	0.00209331	0.38	0.3355	1	0	0.164816	0.268301	0.0208104	0.0144467	0.419	0.38625	1	0	Congruent	UU
ENSMUSG00000017299	Dnttip1	0.0632111	0.0103811	0.0279465	0	0.103	0.0855	1	0	0.0752818	0.0651075	0.0236259	0.0102636	0.113	0.0945	1	0	Congruent	UU
ENSMUSG00000017376	Nlk	0.231529	0.0847638	-0.0214138	0.00670649	0.739	0.804	1	0	0.0132997	0.0140762	-0.0638566	0.00982963	0.791	0.83375	1	0	Congruent	DD
ENSMUSG00000017404	Rpl19	1.14331e-11	5.30064e-12	0.135846	0.00095474	0.192	0.111	2.83953e-07	1.31647e-07	0.004796	0.00498013	0.0519327	0.0126803	0.154	0.12275	0.962965	0.0740707	Congruent	UU
ENSMUSG00000017412	Cacnb4	5.58644e-06	6.31427e-06	0.116405	0.0100441	0.879	0.8995	0.138745	0.156821	0.183149	0.22649	0.0280409	0.0170436	0.91	0.9335	1	0	Congruent	UU
ENSMUSG00000017421	Zfp207	0.0266557	0.0176026	0.0546224	0.0113299	0.517	0.4835	1	0	8.64444e-06	5.05006e-06	0.0976698	0.00250348	0.587	0.534	0.247715	0.144715	Congruent	UU
ENSMUSG00000017428	Psmd11	0.166259	0.00943976	0.0175901	0.00307337	0.206	0.185	1	0	0.00655257	0.00478443	0.0386274	0.00764156	0.22	0.18675	1	0	Congruent	UU
ENSMUSG00000017466	Timp2	0.0732816	0.0175826	0.0226036	0.00144257	0.122	0.1025	1	0	0.069157	0.078299	0.0207051	0.00936962	0.113	0.095	1	0	Congruent	UU
ENSMUSG00000017485	Top2b	0.826611	0.00906273	-0.0322621	0.00673584	0.373	0.3565	1	0	0.156226	0.0606724	-0.0697639	0.00552287	0.413	0.41725	1	0	Congruent	DD
ENSMUSG00000017491	Rarb	5.54473e-13	6.76711e-13	0.223199	0.00881855	0.803	0.7775	1.37709e-08	1.68068e-08	0.0101595	0.0176092	0.0757829	0.0344221	0.809	0.80725	0.814044	0.371912	Congruent	UU
ENSMUSG00000017548	Suz12	0.078169	0.0525127	0.0151195	0.006016	0.214	0.187	1	0	0.0942394	0.10313	0.0332119	0.0159203	0.238	0.213	1	0	Congruent	UU
ENSMUSG00000017631	Abr	0.000128142	0.000148502	0.0531524	0.00886383	0.285	0.2265	0.787294	0.300812	6.01172e-06	1.14524e-05	0.116624	0.0161947	0.306	0.24125	0.172272	0.328179	Congruent	UU
ENSMUSG00000017639	Rab11fip4	0.11658	0.0109704	0.0238415	0.000453295	0.17	0.1505	1	0	0.0239506	0.0167618	0.0209139	0.010902	0.178	0.15125	1	0	Congruent	UU
ENSMUSG00000017692	Rhbdl3	0.0155843	0.00806251	0.0364626	0.00474705	0.15	0.122	1	0	0.00202429	0.00146998	0.0527341	0.0039634	0.148	0.11775	1	0	Congruent	UU
ENSMUSG00000017707	Serinc3	0.282359	0.12398	-0.114962	0.0035607	0.19	0.1985	1	0	0.410219	0.211906	-0.0103437	0.0130436	0.176	0.16375	1	0	Congruent	DD
ENSMUSG00000017740	Slc12a5	1.89605e-26	1.19413e-26	0.26672	0.00422769	0.381	0.225	4.70904e-22	2.96574e-22	2.07019e-13	2.0811e-13	0.165338	0.0160356	0.343	0.24475	5.93233e-09	5.9636e-09	Congruent	UU
ENSMUSG00000017776	Crk	0.299721	0.0671235	0.00610084	0.00192117	0.13	0.118	1	0	0.363898	0.173532	0.0031026	0.00620388	0.14	0.1295	1	0	Congruent	UU
ENSMUSG00000017778	Cox7c	3.96617e-14	5.09115e-14	0.16103	0.00889108	0.308	0.197	9.85038e-10	1.26444e-09	5.05203e-09	9.4947e-09	0.130228	0.00964442	0.263	0.1885	0.000144771	0.00027208	Congruent	UU
ENSMUSG00000017781	Pitpna	0.0652348	0.0302186	0.0189418	0.00574479	0.195	0.1695	1	0	0.101422	0.0540168	0.0251408	0.00380856	0.199	0.17975	1	0	Congruent	UU
ENSMUSG00000017802	Retreg3	0.271917	0.0381006	-0.0423936	0.00285887	0.1	0.1095	1	0	0.593708	0.273163	-0.00973832	0.0122952	0.129	0.12875	1	0	Congruent	DD
ENSMUSG00000017831	Rab5a	0.0708538	0.0450536	-0.0355166	0.00486477	0.086	0.103	1	0	0.629277	0.155953	-0.00392971	0.00767395	0.121	0.11775	1	0	Congruent	DD
ENSMUSG00000017969	Ptgis	9.06769e-12	2.92095e-12	0.120848	0.00150648	0.147	0.077	2.25205e-07	7.25446e-08	6.58139e-13	5.15268e-13	0.0902209	0.00628953	0.115	0.05575	1.88596e-08	1.47655e-08	Congruent	UU
ENSMUSG00000018068	Ints2	0.0926379	0.0960703	0.0283788	0.0077174	0.136	0.1165	1	0	0.00583726	0.00230946	0.0423308	0.00267245	0.152	0.1245	1	0	Congruent	UU
ENSMUSG00000018171	Vmp1	5.86375e-09	2.27317e-09	-0.367948	0.0097123	0.383	0.44	0.000145632	5.64565e-05	2.77181e-11	5.54258e-11	-0.276493	0.0205801	0.431	0.516	7.94291e-07	1.58828e-06	Congruent	DD
ENSMUSG00000018199	Ro60	0.091447	0.0832527	0.0192196	0.0107384	0.118	0.099	1	0	0.300701	0.305593	0.0110674	0.0107214	0.143	0.13075	1	0	Congruent	UU
ENSMUSG00000018326	Ywhab	3.56774e-10	3.74114e-10	0.119208	0.00469895	0.209	0.131	8.86084e-06	9.29149e-06	0.00864922	0.0167696	0.0520914	0.0161725	0.196	0.15975	1	0	Congruent	UU
ENSMUSG00000018363	Smurf2	0.00836458	0.00336904	0.0100836	0.0015063	0.311	0.263	1	0	0.00102939	0.00152569	0.0808092	0.00991769	0.345	0.29825	1	0	Congruent	UU
ENSMUSG00000018379	Srsf1	4.09564e-05	1.24887e-05	0.0951031	0.00375742	0.355	0.2925	0.898935	0.142927	3.5481e-07	4.24361e-07	0.108452	0.00448407	0.364	0.292	0.0101674	0.0121605	Congruent	UU
ENSMUSG00000018411	Mapt	3.90492e-16	5.26756e-16	-0.400343	0.0179201	0.585	0.682	9.69826e-12	1.30825e-11	0.000182752	0.000340596	-0.187985	0.0279744	0.64	0.67425	0.511454	0.564154	Congruent	DD
ENSMUSG00000018412	Kansl1	0.0129425	0.00126506	-0.09482	0.000711146	0.818	0.875	1	0	0.578731	0.293033	-0.0221308	0.0202149	0.879	0.8815	1	0	Congruent	DD
ENSMUSG00000018417	Myo1b	0.000131742	4.65787e-05	0.093589	0.00537025	0.289	0.234	1	0	0.0175613	0.0316254	0.0597641	0.0177201	0.29	0.252	0.889591	0.220817	Congruent	UU
ENSMUSG00000018425	Dhx40	0.000357456	0.000366756	0.0631163	0.00845486	0.211	0.162	1	0	0.00191682	0.00294804	0.0592248	0.00614032	0.196	0.15925	1	0	Congruent	UU
ENSMUSG00000018427	Ypel2	0.381038	0.0178781	-0.130959	0.00262509	0.386	0.3745	1	0	0.3236	0.232629	-0.0918425	0.017068	0.392	0.3935	1	0	Congruent	DD
ENSMUSG00000018428	Akap1	3.73556e-07	2.77856e-07	0.0818777	0.00198567	0.142	0.089	0.00927765	0.00690083	3.09679e-05	5.15343e-05	0.0591101	0.00681897	0.116	0.07775	0.363545	0.440415	Congruent	UU
ENSMUSG00000018451	6330403K07Rik	4.62118e-13	2.55336e-13	0.119654	0.000502656	0.143	0.0695	1.14772e-08	6.34154e-09	6.41832e-11	9.31418e-11	0.10928	0.0047963	0.151	0.08825	1.83923e-06	2.66907e-06	Congruent	UU
ENSMUSG00000018474	Chd3	4.74967e-15	2.66923e-15	0.188967	0.00389945	0.3	0.19	1.17963e-10	6.6293e-11	9.10487e-15	1.20252e-14	0.166336	0.0115422	0.275	0.17725	2.60909e-10	3.44595e-10	Congruent	UU
ENSMUSG00000018476	Kdm6b	0.0142729	0.00146568	0.040387	0	0.106	0.082	1	0	1.02965e-06	1.00036e-06	0.0742021	0.00493615	0.108	0.067	0.0295057	0.0286662	Congruent	UU
ENSMUSG00000018481	Appbp2	0.0833809	0.00863093	-0.106889	0.00518953	0.202	0.2185	1	0	0.683176	0.274123	-0.0243842	0.0107724	0.233	0.22625	1	0	Congruent	DD
ENSMUSG00000018501	Ncor1	1.33274e-06	1.70893e-06	-0.129595	0.0106869	0.667	0.7625	0.0330998	0.042443	0.0622637	0.048052	-0.048962	0.015603	0.74	0.7725	1	0	Congruent	DD
ENSMUSG00000018509	Cenpv	0.00222504	0.00154453	0.0427195	0.00617836	0.162	0.1255	1	0	0.00803164	0.00739865	0.0370806	0.0109974	0.169	0.1395	1	0	Congruent	UU
ENSMUSG00000018537	Pcgf2	0.00107302	0.000138439	0.0670178	0	0.115	0.0835	1	0	4.87098e-09	6.87452e-09	0.0737392	0.00874065	0.111	0.061	0.000139583	0.000196996	Congruent	UU
ENSMUSG00000018548	Trim37	0.00363332	0.00404112	0.0461004	0.012592	0.289	0.2415	1	0	0.135583	0.108207	0.0267851	0.00722988	0.31	0.28825	1	0	Congruent	UU
ENSMUSG00000018648	Dusp14	8.44094e-10	5.81919e-10	0.129927	0	0.134	0.073	2.09639e-05	1.44525e-05	0.058477	0.0480381	0.0165998	0.00625166	0.11	0.09225	1	0	Congruent	UU
ENSMUSG00000018651	Tada2a	0.958849	0.00943549	-0.0336423	0.00180876	0.154	0.15	1	0	0.708381	0.240548	-0.0178954	0.00740507	0.158	0.16075	1	0	Congruent	DD
ENSMUSG00000018666	Cbx1	0.0739583	0.00132799	0.0318613	0.000990427	0.11	0.093	1	0	0.091608	0.060706	0.0242987	0.00966707	0.112	0.096	1	0	Congruent	UU
ENSMUSG00000018707	Dync1h1	1.23038e-06	1.51635e-06	0.0953271	0.00493647	0.343	0.262	0.0305577	0.0376601	0.0695664	0.0736161	0.0316339	0.0177727	0.316	0.28475	1	0	Congruent	UU
ENSMUSG00000018736	Ndel1	0.19772	0.0248004	0.0203431	0	0.156	0.1405	1	0	0.00756714	0.00647839	0.040988	0.010872	0.164	0.13325	1	0	Congruent	UU
ENSMUSG00000018765	Fxr2	0.00270122	0.00233834	0.0655568	0.00828638	0.179	0.142	1	0	0.00127144	0.00220603	0.0595985	0.0161532	0.174	0.1335	0.764066	0.471868	Congruent	UU
ENSMUSG00000018770	Atp5g3	3.69879e-15	5.20748e-15	0.142723	0.0101942	0.205	0.107	9.18631e-11	1.29333e-10	2.41167e-13	4.14972e-13	0.131149	0.00870912	0.188	0.11	6.91087e-09	1.18914e-08	Congruent	UU
ENSMUSG00000018800	Abca5	0.217307	0.103095	0.00727104	0.00671589	0.177	0.1605	1	0	0.0154497	0.0273945	0.0587826	0.0195877	0.215	0.18	1	0	Congruent	UU
ENSMUSG00000018849	Wwc1	4.3892e-05	4.76112e-05	0.083472	0.00548218	0.207	0.154	0.626984	0.527525	0.0567352	0.0499034	0.0372694	0.01775	0.207	0.18	1	0	Congruent	UU
ENSMUSG00000018909	Arrb1	1.21082e-05	8.44306e-06	0.0868315	0.00448808	0.234	0.1745	0.30072	0.209692	0.000515688	0.000689691	0.0617353	0.0106179	0.22	0.177	0.99425	0.0115004	Congruent	UU
ENSMUSG00000018995	Nars2	0.0177531	0.0154541	0.0393026	0.00999254	0.197	0.165	1	0	0.418949	0.0660203	0.00583143	0.00407531	0.193	0.18275	1	0	Congruent	UU
ENSMUSG00000019039	Dalrd3	0.0801041	0.0477161	0.076436	0.0114806	0.518	0.51	1	0	9.84398e-51	1.43909e-50	0.406934	0.00480391	0.509	0.30825	2.82089e-46	4.12384e-46	Congruent	UU
ENSMUSG00000019054	Fis1	0.0380628	0.00370441	0.0301548	0.000495334	0.109	0.088	1	0	0.0637092	0.0848539	0.0330107	0.0140835	0.118	0.09775	1	0	Congruent	UU
ENSMUSG00000019087	Atp6ap1	0.00847141	0.00585542	0.0345096	0.00269403	0.184	0.149	1	0	1.17168e-06	1.24415e-06	0.0714385	0.00450146	0.184	0.12975	0.0335757	0.0356523	Congruent	UU
ENSMUSG00000019124	Scrn1	6.198e-05	8.75105e-06	0.0933347	0.000424793	0.267	0.2115	1	0	0.000132615	0.000252833	0.0928885	0.00654479	0.272	0.219	0.383653	0.430341	Congruent	UU
ENSMUSG00000019132	BC005537	2.39466e-06	5.72852e-07	0.0793525	0.00421024	0.282	0.212	0.0594737	0.0142274	0.0100037	0.0159353	0.0372033	0.00879804	0.281	0.24025	1	0	Congruent	UU
ENSMUSG00000019179	Mdh2	0.000266077	0.000241745	0.0582706	0.00579901	0.149	0.1075	1	0	0.00027638	0.000210318	0.0635677	0.00794311	0.146	0.11075	1	0	Congruent	UU
ENSMUSG00000019188	H13	0.00263002	0.000340595	0.0424505	0.000495334	0.12	0.0895	1	0	0.428546	0.18552	0.00458374	0.00598624	0.102	0.09425	1	0	Congruent	UU
ENSMUSG00000019189	Rnf145	0.0114826	0.0117786	0.0464822	0.00710571	0.163	0.1325	1	0	0.164631	0.148517	0.017253	0.0125209	0.179	0.15975	1	0	Congruent	UU
ENSMUSG00000019194	Scn1b	8.88383e-05	0.000104465	0.0650526	0.00754731	0.123	0.0835	0.6859	0.444204	0.0267962	0.0191469	0.0272076	0.00442485	0.116	0.09525	1	0	Congruent	UU
ENSMUSG00000019210	Atp6v1e1	6.51346e-07	2.69038e-07	0.0795413	0	0.186	0.1265	0.0161768	0.00668183	2.08147e-05	1.05746e-05	0.0640735	0.00366877	0.186	0.14	0.596467	0.303025	Congruent	UU
ENSMUSG00000019254	Ppp1r12c	2.64118e-07	6.96344e-08	0.103837	0.00227253	0.234	0.166	0.00655962	0.00172944	1.16685e-06	1.5733e-06	0.0844017	0.00378075	0.189	0.1355	0.0334373	0.0450845	Congruent	UU
ENSMUSG00000019302	Atp6v0a1	0.0766075	0.0588571	0.0642292	0.00673006	0.663	0.6825	1	0	0.434462	0.426239	0.0362189	0.0243344	0.708	0.719	1	0	Congruent	UU
ENSMUSG00000019373	Cops3	0.0529239	0.0364597	0.0277321	0.00429332	0.139	0.1165	1	0	0.0202295	0.0147138	0.026271	0.00964741	0.144	0.11925	1	0	Congruent	UU
ENSMUSG00000019428	Fkbp8	0.001632	0.000397324	0.058466	0.000487755	0.141	0.1075	1	0	2.27342e-06	9.99783e-07	0.0599432	0.00160733	0.143	0.09775	0.0651472	0.0286498	Congruent	UU
ENSMUSG00000019432	Ddx39b	4.55615e-05	5.37125e-05	0.0846346	0.00394808	0.24	0.184	0.594142	0.57397	0.000106015	0.000122811	0.0609517	0.0169264	0.233	0.179	0.504699	0.571949	Congruent	UU
ENSMUSG00000019478	Rab4a	0.00192854	0.000627764	0.0538511	0.00253577	0.105	0.076	1	0	0.278123	0.229549	0.0134027	0.0102838	0.1	0.08875	1	0	Congruent	UU
ENSMUSG00000019505	Ubb	8.08543e-33	1.10149e-32	0.394742	0.00772697	0.455	0.274	2.0081e-28	2.73567e-28	3.27603e-49	3.79166e-49	0.390471	0.0132645	0.43	0.23375	9.38779e-45	1.08654e-44	Congruent	UU
ENSMUSG00000019518	Ap4m1	0.195187	0.0232337	0.0185979	0	0.113	0.0995	1	0	7.45467e-05	0.000134509	0.0629206	0.0160692	0.111	0.0715	0.408126	0.42941	Congruent	UU
ENSMUSG00000019647	Sema6a	6.41162e-10	6.01832e-10	-0.176984	0.00706269	0.087	0.1525	1.59239e-05	1.49471e-05	5.4975e-06	1.8374e-06	-0.131762	0.00338138	0.101	0.14425	0.157536	0.0526526	Congruent	DD
ENSMUSG00000019710	Mrpl24	0.00546383	0.00255967	0.0335818	0.00247667	0.115	0.087	1	0	0.0230667	0.0279637	0.0353115	0.01354	0.123	0.09775	1	0	Congruent	UU
ENSMUSG00000019726	Lyst	0.036221	0.00513997	0.0737655	0.000604706	0.534	0.507	1	0	0.560214	0.263396	0.0071364	0.0167679	0.658	0.675	1	0	Congruent	UU
ENSMUSG00000019775	Rgs17	2.621e-06	2.58882e-06	0.101316	0.0078115	0.372	0.2935	0.0650951	0.0642958	2.23747e-05	2.50791e-05	0.107747	0.00464212	0.439	0.37325	0.496528	0.488471	Congruent	UU
ENSMUSG00000019777	Hdac2	0.401243	0.184952	0.0128687	0.00384777	0.133	0.123	1	0	0.00601759	0.00661901	0.0384605	0.00520585	0.149	0.1195	1	0	Congruent	UU
ENSMUSG00000019785	Clvs2	0.00736842	0.0058817	0.0532189	0.00287498	0.158	0.1275	1	0	0.074717	0.057065	0.0288528	0.00666207	0.179	0.15775	1	0	Congruent	UU
ENSMUSG00000019790	Stxbp5	0.740334	0.0736707	-0.00465491	0.000312974	0.48	0.491	1	0	0.00708286	0.00480604	-0.0567891	0.0095042	0.589	0.64025	1	0	Congruent	DD
ENSMUSG00000019795	Pcmt1	0.00336894	0.00191017	0.0498297	0.0065922	0.271	0.2275	1	0	1.27197e-06	1.94528e-06	0.101635	0.00884714	0.305	0.23725	0.0364496	0.055744	Congruent	UU
ENSMUSG00000019796	Lrp11	3.03313e-06	3.97081e-06	0.0715137	0.00603932	0.13	0.081	0.0753308	0.098619	0.163181	0.261334	0.0255017	0.0134708	0.117	0.10075	1	0	Congruent	UU
ENSMUSG00000019804	Snx3	0.0967205	0.0322936	0.0113711	0.00269048	0.188	0.165	1	0	0.195841	0.161082	0.0224164	0.0116567	0.185	0.16875	1	0	Congruent	UU
ENSMUSG00000019806	Aig1	0.00157721	0.000293146	-0.162855	0.000320748	0.331	0.36	1	0	6.89953e-06	1.33657e-05	-0.143558	0.0116147	0.438	0.5035	0.197713	0.383008	Congruent	DD
ENSMUSG00000019809	Pex3	0.00141111	0.00156156	0.0493537	0.00820945	0.151	0.113	1	0	0.000313528	0.000608574	0.061576	0.0157699	0.156	0.111	0.450107	0.523485	Congruent	UU
ENSMUSG00000019820	Utrn	1.11418e-09	1.18304e-09	0.129782	0.00973395	0.488	0.3695	2.76718e-05	2.93821e-05	0.391836	0.3912	0.0093401	0.0196079	0.445	0.42225	1	0	Congruent	UU
ENSMUSG00000019828	Grm1	6.8342e-15	5.09127e-15	0.239538	0.00108066	0.82	0.8005	1.69734e-10	1.26447e-10	0.287027	0.184486	0.0191973	0.0188875	0.812	0.8395	1	0	Congruent	UU
ENSMUSG00000019831	Wasf1	0.0511414	0.00164583	0.0879476	0.00503481	0.553	0.5635	1	0	3.64114e-05	3.49218e-05	0.102718	0.0115586	0.65	0.61425	0.638942	0.437335	Congruent	UU
ENSMUSG00000019841	Rev3l	0.00117319	0.00119171	-0.101347	0.00783521	0.492	0.5475	1	0	0.0433498	0.0353465	-0.0534253	0.0155023	0.566	0.60475	1	0	Congruent	DD
ENSMUSG00000019852	Arfgef3	0.00793936	0.00710444	0.0526257	0.0106	0.316	0.2735	1	0	0.00226182	0.0031308	0.0601252	0.015026	0.36	0.3115	1	0	Congruent	UU
ENSMUSG00000019856	Fam184a	0.306252	0.017452	0.0320359	0.000818075	0.261	0.248	1	0	0.158763	0.0981162	0.0189424	0.0135016	0.295	0.272	1	0	Congruent	UU
ENSMUSG00000019868	Vta1	0.182112	0.0487696	0.00268659	0.00379941	0.134	0.1175	1	0	0.0856482	0.129259	0.0268933	0.013624	0.165	0.1405	1	0	Congruent	UU
ENSMUSG00000019873	Reep3	0.715114	0.0772292	-0.0103059	0.00140547	0.123	0.118	1	0	0.556763	0.110634	-0.00846681	0.0117289	0.136	0.13275	1	0	Congruent	DD
ENSMUSG00000019877	Serinc1	1.21225e-12	6.68841e-13	0.178057	0	0.371	0.26	3.01074e-08	1.66113e-08	0.000185998	0.000191462	0.0880607	0.0154969	0.342	0.2865	0.754583	0.490833	Congruent	UU
ENSMUSG00000019878	Hsf2	0.010231	0.00495214	0.0486849	0.00287769	0.148	0.1195	1	0	0.247588	0.238135	0.0122938	0.00715941	0.157	0.14325	1	0	Congruent	UU
ENSMUSG00000019888	Mgat4c	1.01336e-22	8.61974e-23	0.369811	0.004303	0.831	0.816	2.51679e-18	2.1408e-18	0.0328348	0.0496587	0.0624365	0.027621	0.845	0.86725	1	0	Congruent	UU
ENSMUSG00000019889	Ptprk	7.47547e-25	1.05452e-24	-0.497374	0.0228115	0.122	0.2515	1.85661e-20	2.619e-20	2.27092e-18	4.53315e-18	-0.382769	0.0256126	0.162	0.2755	6.50755e-14	1.29902e-13	Congruent	DD
ENSMUSG00000019894	Slc6a15	0.000384547	0.000115187	0.0632536	0.000983267	0.131	0.0945	1	0	3.07795e-05	4.5727e-05	0.0701363	0.0152034	0.168	0.12125	0.428589	0.451358	Congruent	UU
ENSMUSG00000019899	Lama2	5.13233e-08	4.95693e-08	-0.205911	0.000827364	0.071	0.1225	0.00127466	0.0012311	3.43198e-05	4.55415e-05	-0.118787	0.0173881	0.081	0.1195	0.524263	0.526392	Congruent	DD
ENSMUSG00000019906	Lin7a	1.24019e-06	5.69427e-07	0.105924	0.00492714	0.225	0.1625	0.0308013	0.0141423	0.000218619	0.000351266	0.0915033	0.00673446	0.276	0.2255	0.759567	0.462426	Congruent	UU
ENSMUSG00000019907	Ppp1r12a	0.120207	0.0323483	-0.00893458	0.00334261	0.621	0.69	1	0	0.0373983	0.050027	-0.0609139	0.0150378	0.702	0.7395	1	0	Congruent	DD
ENSMUSG00000019916	P4ha1	5.37817e-06	4.50204e-06	0.110902	0.00348501	0.31	0.241	0.133572	0.111813	0.119653	0.0673051	0.0416145	0.0063426	0.315	0.29125	1	0	Congruent	UU
ENSMUSG00000019920	Lims1	0.0504564	0.0086347	-0.0884413	0	0.168	0.189	1	0	0.12538	0.0310894	-0.0468558	0.00506235	0.193	0.2085	1	0	Congruent	DD
ENSMUSG00000019923	Zwint	4.5303e-17	2.14909e-17	0.207213	0.00289871	0.357	0.2345	1.12515e-12	5.33749e-13	0.00152174	0.00211064	0.0783584	0.0152171	0.336	0.2925	0.906013	0.187975	Congruent	UU
ENSMUSG00000019927	Ube2d1	0.54935	0.00639405	-0.097065	0.00280754	0.2	0.2005	1	0	0.375121	0.344591	-0.0137109	0.0254138	0.225	0.20775	1	0	Congruent	DD
ENSMUSG00000019943	Atp2b1	8.75239e-45	6.68768e-45	0.463086	0.00351396	0.95	0.907	2.17374e-40	1.66095e-40	8.03726e-06	1.29578e-05	0.130671	0.027478	0.944	0.9515	0.230316	0.371318	Congruent	UU
ENSMUSG00000019947	Arid5b	0.00238992	0.000768517	-0.13836	0.00364264	0.159	0.192	1	0	0.282924	0.269226	-0.0527507	0.0151323	0.227	0.237	1	0	Congruent	DD
ENSMUSG00000019951	Uhrf1bp1l	0.000567371	0.000454736	0.0772499	0.00563255	0.248	0.201	1	0	0.00497407	0.00827377	0.058467	0.0128971	0.28	0.2395	1	0	Congruent	UU
ENSMUSG00000019969	Psen1	0.0308911	0.00907857	0.0218417	0.00510884	0.163	0.136	1	0	0.0161022	0.0192142	0.0305046	0.010266	0.185	0.15575	1	0	Congruent	UU
ENSMUSG00000019971	Cep290	0.0327709	0.0185481	0.0420785	0.00421256	0.164	0.139	1	0	0.46883	0.271907	0.00642313	0.0181469	0.193	0.18475	1	0	Congruent	UU
ENSMUSG00000019977	Hbs1l	0.16412	0.0398101	-0.00671164	0	0.221	0.1975	1	0	0.421922	0.363932	-0.00341863	0.0133544	0.232	0.2175	1	0	Congruent	DD
ENSMUSG00000019978	Epb41l2	8.5647e-05	1.34079e-05	-0.235346	0.00587767	0.151	0.1955	1	0	0.000432417	0.00031487	-0.120613	0.0209685	0.158	0.19525	1	0	Congruent	DD
ENSMUSG00000019984	Med23	0.0898979	0.0551424	0.0288255	0.00601308	0.168	0.1465	1	0	9.45837e-05	8.65066e-05	0.0628274	0.00489389	0.201	0.1565	0.826487	0.204779	Congruent	UU
ENSMUSG00000019986	Ahi1	0.0403118	0.00305648	0.0603228	0.00505809	0.835	0.885	1	0	0.412254	0.372535	0.0248056	0.0186438	0.887	0.91575	1	0	Congruent	UU
ENSMUSG00000019990	Pde7b	2.41774e-20	2.23956e-20	0.261982	0.00537928	0.862	0.839	6.0047e-16	5.56217e-16	1.79246e-05	1.6631e-05	0.151401	0.0355406	0.856	0.84975	0.513648	0.476577	Congruent	UU
ENSMUSG00000019996	Map7	2.4994e-23	2.65955e-23	-0.569456	0.000565331	0.463	0.581	6.20752e-19	6.60526e-19	7.91796e-15	1.41387e-14	-0.360198	0.0207469	0.591	0.664	2.26897e-10	4.0516e-10	Congruent	DD
ENSMUSG00000020003	Pex7	0.57263	0.33141	0.00265457	0.0084155	0.144	0.137	1	0	0.338566	0.15495	0.00364215	0.00749714	0.162	0.15075	1	0	Congruent	UU
ENSMUSG00000020015	Cdk17	2.19932e-05	9.79061e-06	0.099887	0.000638718	0.786	0.7915	0.546224	0.243159	1.24289e-06	1.85181e-06	0.149244	0.0144823	0.826	0.82125	0.0356163	0.0530655	Congruent	UU
ENSMUSG00000020022	Ndufa12	1.25907e-05	7.75316e-07	0.0719329	0.00151169	0.119	0.077	0.312704	0.0192558	0.000493654	0.000981576	0.0533026	0.0108511	0.116	0.0785	0.311603	0.46079	Congruent	UU
ENSMUSG00000020023	Tmcc3	0.000691463	0.000179364	-0.189187	0.00342559	0.207	0.243	1	0	0.0258594	0.0486753	-0.0818166	0.0260018	0.191	0.222	1	0	Congruent	DD
ENSMUSG00000020048	Hsp90b1	4.16445e-08	4.7751e-08	0.0949822	0.00925494	0.276	0.1945	0.00103428	0.00118594	1.44257e-07	1.75135e-07	0.111821	0.00672535	0.278	0.2115	0.00413383	0.00501867	Congruent	UU
ENSMUSG00000020064	Herc4	0.913924	0.0628433	-0.0584753	0.00430687	0.232	0.225	1	0	0.545253	0.0835677	-0.0428073	0.0138372	0.253	0.247	1	0	Congruent	DD
ENSMUSG00000020069	Hnrnph3	0.0404784	0.00537639	0.011009	0.00702739	0.293	0.256	1	0	0.000266025	0.00042851	0.0589988	0.00921395	0.305	0.25025	0.828879	0.342242	Congruent	UU
ENSMUSG00000020070	Rufy2	0.00788679	0.00224824	0.0327481	0.00230367	0.317	0.269	1	0	1.18603e-05	1.813e-05	0.0822931	0.0124848	0.343	0.27875	0.312428	0.465389	Congruent	UU
ENSMUSG00000020074	Ccar1	0.0908677	0.0368214	0.00979277	0.00534199	0.355	0.319	1	0	3.58876e-08	5.63486e-08	0.125953	0.0157653	0.409	0.322	0.0010284	0.00161473	Congruent	UU
ENSMUSG00000020076	Ddx50	0.18304	0.104466	0.0100948	0.00843853	0.335	0.311	1	0	0.0699107	0.0608424	0.0238398	0.0096653	0.384	0.34875	1	0	Congruent	UU
ENSMUSG00000020115	Tbk1	0.00723536	0.00380146	0.0338561	0.00691916	0.226	0.1875	1	0	0.00420884	0.0069002	0.0490222	0.0208002	0.229	0.187	1	0	Congruent	UU
ENSMUSG00000020128	Vps54	0.0023344	0.00149749	0.0473816	0.00400684	0.293	0.244	1	0	0.114921	0.0782064	0.00936786	0.0127092	0.309	0.28325	1	0	Congruent	UU
ENSMUSG00000020134	Peli1	1.92587e-06	1.61595e-06	0.12533	0.00309185	0.371	0.289	0.0478309	0.0401338	0.00025471	9.90577e-05	0.0923704	0.0109283	0.39	0.334	1	0	Congruent	UU
ENSMUSG00000020149	Rab1a	0.815138	0.0870044	0.0102495	0.00193943	0.114	0.112	1	0	0.122318	0.126952	0.0190052	0.00742322	0.129	0.113	1	0	Congruent	UU
ENSMUSG00000020151	Ptprr	0.0118516	0.000814613	0.0562423	0.000448117	0.197	0.1645	1	0	0.738476	0.259333	0.00197097	0.0095603	0.21	0.20625	1	0	Congruent	UU
ENSMUSG00000020152	Actr2	0.00760223	0.000758189	0.0401306	0.00126021	0.254	0.216	1	0	0.0272755	0.0294524	0.0243106	0.0112865	0.266	0.23025	1	0	Congruent	UU
ENSMUSG00000020153	Ndufs7	0.000748081	0.000465916	0.0489368	0.00488808	0.124	0.089	1	0	0.124834	0.213069	0.0165992	0.0137957	0.103	0.08575	1	0	Congruent	UU
ENSMUSG00000020160	Meis1	0.0356519	0.00762087	-0.0565337	0	0.132	0.155	1	0	0.133613	0.162073	-0.0560458	0.00805776	0.131	0.149	1	0	Congruent	DD
ENSMUSG00000020163	Uqcr11	1.70184e-11	1.29195e-11	0.102985	0.00249118	0.148	0.077	4.2267e-07	3.20869e-07	6.08403e-10	1.1774e-09	0.0853501	0.00507728	0.117	0.063	1.74344e-05	3.37395e-05	Congruent	UU
ENSMUSG00000020166	Cnot2	0.32647	0.149971	-0.0455625	0.00492162	0.554	0.5785	1	0	0.025115	0.0230859	-0.0718499	0.0134617	0.616	0.64775	1	0	Congruent	DD
ENSMUSG00000020170	Frs2	0.329785	0.0441915	0.00692467	0.00469227	0.22	0.2055	1	0	0.13702	0.103529	0.0181638	0.0155805	0.235	0.2135	1	0	Congruent	UU
ENSMUSG00000020175	Rab36	0.0211149	0.0115186	0.0345799	0.00303012	0.101	0.079	1	0	0.0330278	0.0380839	0.0372798	0.0096335	0.105	0.0825	1	0	Congruent	UU
ENSMUSG00000020176	Grb10	0.103369	0.0250423	0.0183353	0.00132687	0.191	0.17	1	0	3.32632e-06	4.87635e-06	0.107741	0.00841435	0.253	0.196	0.095319	0.139737	Congruent	UU
ENSMUSG00000020178	Adora2a	4.57235e-07	2.20275e-07	0.111056	0.00095474	0.163	0.107	0.0113559	0.00547074	0.0309833	0.0292199	0.04022	0.00725836	0.131	0.10925	1	0	Congruent	UU
ENSMUSG00000020181	Nav3	0.742891	0.245728	-0.129558	0.01787	0.87	0.8965	1	0	0.741627	0.193152	-0.0818987	0.0165698	0.929	0.93625	1	0	Congruent	DD
ENSMUSG00000020184	Mdm2	0.62892	0.0638187	-0.0504108	0.00212308	0.185	0.1875	1	0	0.353923	0.0864928	-0.00934751	0.0039935	0.192	0.17925	1	0	Congruent	DD
ENSMUSG00000020196	Cabin1	0.00559362	0.00269346	0.0320249	0.00311222	0.212	0.1745	1	0	0.161796	0.193066	0.0236095	0.00973449	0.231	0.2095	1	0	Congruent	UU
ENSMUSG00000020198	Ap3d1	0.00185612	0.000990166	0.0412913	0.000459212	0.186	0.1465	1	0	7.53348e-06	1.20372e-05	0.0662042	0.00388844	0.168	0.11925	0.215879	0.344938	Congruent	UU
ENSMUSG00000020220	Vps13d	0.732223	0.232214	-0.0181863	0.00689972	0.248	0.24	1	0	0.347497	0.238118	-0.0311803	0.0112895	0.277	0.28875	1	0	Congruent	DD
ENSMUSG00000020231	Dip2a	1.1635e-10	1.5359e-10	-0.287366	0.00543894	0.157	0.2355	2.88967e-06	3.81456e-06	1.16746e-07	9.98638e-08	-0.168381	0.0152448	0.169	0.229	0.00334548	0.0028617	Congruent	DD
ENSMUSG00000020246	Hcfc2	0.881216	0.0561493	-0.0127749	0.000486128	0.106	0.1025	1	0	0.511497	0.247052	-0.0207145	0.00901634	0.106	0.1115	1	0	Congruent	DD
ENSMUSG00000020250	Txnrd1	0.000995519	0.000442521	0.0446216	0.00151393	0.106	0.0745	1	0	0.051084	0.0511634	0.0228096	0.00708987	0.109	0.09075	1	0	Congruent	UU
ENSMUSG00000020255	Nopchap1	0.00941087	0.00440828	0.0361772	0.00315345	0.192	0.158	1	0	0.578953	0.249243	0.00479597	0.0104394	0.194	0.187	1	0	Congruent	UU
ENSMUSG00000020262	Adarb1	0.0136717	0.00132383	0.052069	0.00131546	0.228	0.1965	1	0	0.00458422	0.00215855	0.0420496	0.00723467	0.255	0.218	1	0	Congruent	UU
ENSMUSG00000020267	Hint1	0.00955731	0.0034057	0.038622	0.00197702	0.112	0.0855	1	0	0.0062941	0.00549783	0.0355862	0.00292548	0.106	0.082	1	0	Congruent	UU
ENSMUSG00000020271	Fbxw11	0.857105	0.120643	-0.0244219	0.000856181	0.204	0.1985	1	0	0.504048	0.485621	-0.000915462	0.0211754	0.226	0.21175	1	0	Congruent	DD
ENSMUSG00000020283	Pex13	0.905558	0.11834	-0.00200405	0.00472944	0.131	0.129	1	0	0.552346	0.385397	-0.00722856	0.0147022	0.147	0.13975	1	0	Congruent	DD
ENSMUSG00000020297	Nsg2	2.56827e-14	2.9923e-14	0.205715	0.00988957	0.41	0.2915	6.37856e-10	7.43167e-10	2.12087e-05	1.75203e-05	0.0929171	0.00317247	0.406	0.34175	0.530206	0.36174	Congruent	UU
ENSMUSG00000020300	Cpeb4	0.000150186	0.000123426	0.0656481	0.00554613	0.399	0.328	1	0	0.121181	0.0914276	0.0569531	0.0110582	0.545	0.53475	1	0	Congruent	UU
ENSMUSG00000020305	Asb3	0.0415833	0.0251475	0.0190049	0.00676089	0.33	0.2925	1	0	0.0110725	0.00639451	0.0475959	0.00957774	0.368	0.33025	1	0	Congruent	UU
ENSMUSG00000020311	Erlec1	0.58764	0.284946	-0.0104067	0.00756157	0.182	0.1725	1	0	0.401161	0.235051	-0.00212828	0.00639029	0.207	0.19475	1	0	Congruent	DD
ENSMUSG00000020315	Sptbn1	0.000828033	9.22376e-05	0.0508664	0.00157459	0.832	0.845	1	0	0.200661	0.155671	0.0270621	0.0135194	0.854	0.867	1	0	Congruent	UU
ENSMUSG00000020319	Wdpcp	0.836988	0.194771	-0.0195114	0.00365478	0.138	0.1335	1	0	0.579174	0.124132	-0.0141461	0.00620826	0.153	0.159	1	0	Congruent	DD
ENSMUSG00000020321	Mdh1	2.89925e-15	4.01429e-15	0.203059	0.010804	0.341	0.2235	7.20058e-11	9.96988e-11	2.6367e-07	4.87539e-07	0.125303	0.0193575	0.339	0.2635	0.00755573	0.0139709	Congruent	UU
ENSMUSG00000020333	Acsl6	1.16027e-08	6.59304e-09	0.148397	0.000909621	0.234	0.162	0.000288164	0.000163745	4.22706e-08	5.19541e-08	0.111248	0.00833198	0.227	0.16225	0.00121131	0.0014888	Congruent	UU
ENSMUSG00000020340	Cyfip2	7.49816e-15	5.19849e-15	0.20749	0.00261431	0.439	0.3195	1.86224e-10	1.2911e-10	0.00557235	0.00864521	0.0849399	0.0229411	0.514	0.478	0.770688	0.458625	Congruent	UU
ENSMUSG00000020361	Hspa4	7.79335e-06	7.01819e-06	0.116357	0.00424175	0.273	0.2095	0.193556	0.174304	0.000190647	0.000290197	0.0750918	0.0132899	0.262	0.21	0.532007	0.541553	Congruent	UU
ENSMUSG00000020368	Canx	1.02419e-08	1.13237e-08	0.115011	0.00368948	0.301	0.2145	0.000254367	0.000281237	0.000636128	0.000608818	0.0549912	0.0179545	0.291	0.2415	0.882731	0.234537	Congruent	UU
ENSMUSG00000020375	Rufy1	0.0533219	0.00181066	-0.0535457	0.00236746	0.094	0.1125	1	0	0.678548	0.0949718	-0.00182624	0.00363207	0.121	0.117	1	0	Congruent	DD
ENSMUSG00000020376	Rnf130	2.0799e-05	7.99492e-07	-0.183614	0.00453474	0.232	0.2825	0.516563	0.0198562	0.0267563	0.0258749	-0.0915648	0.0123683	0.281	0.30725	1	0	Congruent	DD
ENSMUSG00000020385	Clk4	0.0523946	0.0232717	0.00617874	0.000972951	0.424	0.376	1	0	0.122838	0.13023	0.0155271	0.0131684	0.461	0.425	1	0	Congruent	UU
ENSMUSG00000020386	Sar1b	0.00904657	0.00456065	0.0279549	0.0041292	0.175	0.141	1	0	0.464334	0.242259	0.00127092	0.00651481	0.154	0.145	1	0	Congruent	UU
ENSMUSG00000020389	Cdkl3	0.0581527	0.0595742	0.0315566	0.00882394	0.122	0.101	1	0	0.803562	0.166323	0.00865977	0.00833028	0.105	0.106	1	0	Congruent	UU
ENSMUSG00000020402	Vdac1	1.21116e-06	2.00996e-07	0.0864386	0.00273863	0.221	0.158	0.0300803	0.00499194	5.5424e-09	8.40634e-09	0.111351	0.00505541	0.238	0.168	0.000158823	0.000240892	Congruent	UU
ENSMUSG00000020412	Ascc2	0.0055274	0.00220233	0.0488215	0.000936337	0.168	0.135	1	0	3.51891e-07	4.54518e-07	0.0808214	0.00632291	0.177	0.1215	0.0100838	0.0130247	Congruent	UU
ENSMUSG00000020431	Adcy1	0.0667131	0.000644846	0.0300396	0.00148025	0.112	0.093	1	0	0.380635	0.178112	0.00609901	0.00653773	0.111	0.1025	1	0	Congruent	UU
ENSMUSG00000020435	Osbp2	4.36685e-07	1.67036e-07	0.14179	0.00103796	0.406	0.325	0.0108455	0.00414851	0.16202	0.149041	0.0278432	0.0143419	0.491	0.4705	1	0	Congruent	UU
ENSMUSG00000020436	Gabrg2	4.17293e-16	4.36858e-16	0.205319	0.00085726	0.327	0.212	1.03639e-11	1.08498e-11	0.000211405	0.000199999	0.0795483	0.00607241	0.338	0.2865	0.894311	0.211379	Congruent	UU
ENSMUSG00000020440	Arf5	0.00220484	0.00198565	0.0422575	0.00391233	0.13	0.097	1	0	0.110415	0.120129	0.0292082	0.00855133	0.121	0.104	1	0	Congruent	UU
ENSMUSG00000020451	Limk2	0.0697897	0.00416194	0.0334747	0	0.135	0.115	1	0	1.27678e-05	9.03054e-06	0.0665864	0.00775033	0.151	0.10625	0.365873	0.258779	Congruent	UU
ENSMUSG00000020454	Eif4enif1	0.240404	0.0690461	0.0222881	0.00048869	0.113	0.101	1	0	0.45105	0.359947	0.0108601	0.00993737	0.119	0.11075	1	0	Congruent	UU
ENSMUSG00000020456	Ogdh	0.00271547	0.000720743	0.0593285	0	0.369	0.3175	1	0	0.01105	0.00801559	0.0553637	0.00845149	0.38	0.34075	1	0	Congruent	UU
ENSMUSG00000020457	Drg1	0.00412632	0.000391749	0.03973	0.000421981	0.246	0.2025	1	0	0.0672187	0.0931461	0.0398182	0.0124153	0.256	0.22775	1	0	Congruent	UU
ENSMUSG00000020458	Rtn4	9.92264e-06	3.60717e-06	-0.237941	0.00285301	0.638	0.6845	0.246439	0.0895877	0.00062106	0.000741782	-0.198348	0.00770588	0.679	0.69275	1	0	Congruent	DD
ENSMUSG00000020459	Mtif2	0.562152	0.137695	0.00708907	0.00393118	0.205	0.196	1	0	0.00146664	0.00112926	0.0655102	0.0041971	0.254	0.213	1	0	Congruent	UU
ENSMUSG00000020460	Rps27a	0.00755062	0.00282421	0.0417113	0.00247307	0.114	0.087	1	0	0.0978259	0.0957263	0.0137129	0.0098846	0.113	0.0955	1	0	Congruent	UU
ENSMUSG00000020462	Cfap36	0.00182226	0.00113686	0.0577385	0.00495324	0.212	0.1705	1	0	0.00176902	0.00308232	0.0642624	0.0164241	0.242	0.19825	0.769219	0.461562	Congruent	UU
ENSMUSG00000020464	Pnpt1	0.000177671	5.893e-05	0.0672785	0.00127597	0.249	0.1955	1	0	2.50404e-09	4.87969e-09	0.14316	0.0204979	0.268	0.187	7.17556e-05	0.000139832	Congruent	UU
ENSMUSG00000020483	Dynll2	9.68578e-05	1.55709e-05	0.0581882	0.000508925	0.107	0.071	1	0	0.00592775	0.00632188	0.0377889	0.0106442	0.107	0.082	1	0	Congruent	UU
ENSMUSG00000020486	Septin4	1.94631e-15	3.52487e-16	-0.30692	0.00257472	0.094	0.1805	4.83386e-11	8.75437e-12	3.83084e-07	7.43374e-07	-0.125709	0.0224762	0.116	0.174	0.0109777	0.0213021	Congruent	DD
ENSMUSG00000020492	Ska2	0.00976584	0.00242554	0.0352196	0.00149764	0.108	0.0825	1	0	0.186525	0.164777	0.0161171	0.0102652	0.106	0.09325	1	0	Congruent	UU
ENSMUSG00000020496	Rnf187	0.0130096	0.00604358	0.0380613	0.00202008	0.1	0.0765	1	0	6.40889e-05	0.000110353	0.0549422	0.00607608	0.106	0.071	0.443195	0.406851	Congruent	UU
ENSMUSG00000020521	Rnft1	0.096311	0.00918401	0.0289495	0.00139395	0.168	0.1475	1	0	0.0125206	0.0139553	0.0423131	0.00942763	0.202	0.16975	1	0	Congruent	UU
ENSMUSG00000020523	Fam114a2	0.846953	0.188988	-0.00517031	0.00535763	0.103	0.1005	1	0	0.778567	0.185735	-0.00758928	0.00285682	0.111	0.108	1	0	Congruent	DD
ENSMUSG00000020524	Gria1	7.96799e-09	1.05943e-08	0.0576721	0.0226596	0.916	0.927	0.000197893	0.000263119	3.16871e-09	4.98401e-09	0.15625	0.0118014	0.955	0.9585	9.08027e-05	0.000142822	Congruent	UU
ENSMUSG00000020525	Ppm1d	0.00700974	0.00272189	0.040429	0.00654537	0.164	0.131	1	0	0.0875933	0.125295	0.0228913	0.010387	0.162	0.13925	1	0	Congruent	UU
ENSMUSG00000020532	Acaca	0.000552229	0.000113849	-0.176162	0.0103667	0.286	0.324	1	0	0.000256109	0.000389909	-0.145547	0.00993807	0.296	0.33825	0.909598	0.180803	Congruent	DD
ENSMUSG00000020547	Bzw2	0.00860568	0.00125592	0.0508491	0	0.192	0.1585	1	0	0.000344971	0.000419185	0.0648076	0.00539169	0.221	0.1785	1	0	Congruent	UU
ENSMUSG00000020570	Sypl	0.0965399	0.0103076	-0.0734118	0.00404907	0.116	0.1295	1	0	0.426507	0.192417	-0.0285177	0.00903637	0.116	0.122	1	0	Congruent	DD
ENSMUSG00000020571	Pdia6	0.00159124	8.82081e-05	0.0507326	0.00145078	0.142	0.1075	1	0	0.00166577	0.00232041	0.0505865	0.011368	0.141	0.10675	0.772587	0.454826	Congruent	UU
ENSMUSG00000020576	Nbas	2.48169e-09	2.25881e-09	-0.348326	0.00518277	0.283	0.352	6.16353e-05	5.60999e-05	9.14775e-06	1.45036e-05	-0.268145	0.0131441	0.363	0.4045	0.262138	0.415616	Congruent	DD
ENSMUSG00000020577	Tspan13	8.72933e-08	6.8182e-08	0.0952183	0.000450492	0.237	0.1645	0.00216802	0.00169337	9.11398e-08	1.68634e-07	0.107592	0.0074767	0.249	0.18275	0.0026117	0.00483239	Congruent	UU
ENSMUSG00000020589	Cyria	1.39246e-08	1.53687e-08	0.13129	0.00686965	0.331	0.245	0.000345833	0.000381696	0.145725	0.112523	0.0251209	0.0166842	0.32	0.296	1	0	Congruent	UU
ENSMUSG00000020590	Snx13	0.206814	0.026813	-0.0132436	0.0008106	0.253	0.231	1	0	0.330263	0.223867	-0.000191023	0.0091125	0.276	0.25925	1	0	Congruent	DD
ENSMUSG00000020594	Pum2	0.308059	0.172698	-0.0102697	0.0036188	0.331	0.3075	1	0	0.568047	0.240686	-0.0215845	0.00932066	0.369	0.35125	1	0	Congruent	DD
ENSMUSG00000020598	Nrcam	0.00209281	0.000233992	-0.0695632	0.00220285	0.683	0.8015	1	0	0.640169	0.181343	-0.00287508	0.0154312	0.737	0.77675	1	0	Congruent	DD
ENSMUSG00000020599	Rgs9	2.21147e-26	2.95606e-26	0.353176	0.00927687	0.769	0.697	5.49239e-22	7.34167e-22	0.000153363	0.000131551	0.113352	0.0187902	0.711	0.68275	0.755571	0.488858	Congruent	UU
ENSMUSG00000020612	Prkar1a	2.90097e-14	3.40878e-14	0.150073	0.00426837	0.323	0.2085	7.20484e-10	8.46605e-10	0.000453647	0.000775787	0.0718019	0.0117013	0.28	0.23175	0.779779	0.440442	Congruent	UU
ENSMUSG00000020623	Map2k6	0.00227382	0.0024183	0.0487782	0.00691623	0.125	0.0925	1	0	0.00227072	0.0013495	0.0424572	0.00424826	0.134	0.1045	1	0	Congruent	UU
ENSMUSG00000020627	Klhl29	0.436884	0.188154	0.0266448	0.0148798	0.744	0.7865	1	0	0.0332883	0.0293962	0.0627525	0.0134039	0.821	0.844	1	0	Congruent	UU
ENSMUSG00000020628	Trappc12	0.186118	0.0478733	0.0262698	0.00374879	0.156	0.14	1	0	0.00515078	0.00468341	0.0401649	0.00751349	0.177	0.1435	1	0	Congruent	UU
ENSMUSG00000020640	Itsn2	0.000144342	5.45367e-05	-0.233037	0.0112724	0.341	0.376	1	0	0.00644166	0.00274215	-0.145927	0.0181001	0.414	0.4365	1	0	Congruent	DD
ENSMUSG00000020646	Mboat2	0.428967	0.19856	-0.0591946	0.0064337	0.226	0.2315	1	0	0.389036	0.230605	-0.00875882	0.0166752	0.255	0.23825	1	0	Congruent	DD
ENSMUSG00000020647	Ncoa1	0.106228	0.010335	-0.022318	0.00149143	0.648	0.713	1	0	0.0258753	0.0222849	-0.0516871	0.0148127	0.693	0.73125	1	0	Congruent	DD
ENSMUSG00000020650	Bcap29	0.00224177	6.51394e-05	0.0464421	0.00099623	0.114	0.084	1	0	0.00346841	0.00670811	0.0475576	0.0101423	0.128	0.0945	0.931105	0.13779	Congruent	UU
ENSMUSG00000020654	Adcy3	0.0027524	0.000798865	0.065115	0.000478153	0.159	0.126	1	0	0.00219437	0.00429681	0.0685743	0.0136138	0.175	0.13525	0.578633	0.487684	Congruent	UU
ENSMUSG00000020658	Efr3b	0.000117458	0.000105009	0.0706547	0.00758471	0.341	0.278	1	0	0.00166755	0.00176692	0.0794492	0.00754063	0.332	0.28775	1	0	Congruent	UU
ENSMUSG00000020661	Dnmt3a	0.00527104	0.00316645	0.0624497	0.00777944	0.686	0.671	1	0	0.610782	0.171544	0.0203558	0.000964543	0.632	0.63425	1	0	Congruent	UU
ENSMUSG00000020664	Dld	0.000217441	0.000268171	0.0584684	0.00848665	0.126	0.087	0.84541	0.218624	0.342723	0.124621	0.0110086	0.00447865	0.118	0.10925	1	0	Congruent	UU
ENSMUSG00000020671	Rab10	0.106217	0.0635797	-0.0831049	0.0114239	0.255	0.27	1	0	0.472011	0.271525	-0.0431377	0.0290285	0.291	0.2915	1	0	Congruent	DD
ENSMUSG00000020672	Sntg2	0.00874142	0.00473147	0.0375856	0.0049774	0.171	0.1385	1	0	0.0494898	0.0703703	0.0378539	0.0176164	0.178	0.153	1	0	Congruent	UU
ENSMUSG00000020674	Pxdn	6.47811e-06	5.67954e-07	0.0963697	0.00135088	0.226	0.168	0.16089	0.0141057	0.000241097	0.000462456	0.0737837	0.00979064	0.233	0.18225	0.462903	0.430199	Congruent	UU
ENSMUSG00000020680	Taf15	0.529284	0.0249051	-0.0360148	0.00107026	0.335	0.313	1	0	0.240637	0.271143	-0.0113594	0.0146336	0.379	0.34775	1	0	Congruent	DD
ENSMUSG00000020696	Rffl	1.4926e-07	1.68691e-07	-0.182722	0.00700563	0.109	0.1655	0.00370702	0.00418961	0.000549119	0.000512274	-0.120572	0.019095	0.126	0.16025	0.78367	0.432659	Congruent	DD
ENSMUSG00000020716	Nf1	2.45422e-05	1.66147e-05	-0.116493	0.00809062	0.71	0.788	0.60953	0.412642	0.3123	0.0911647	-0.0351558	0.00950843	0.809	0.84025	1	0	Congruent	DD
ENSMUSG00000020719	Ddx5	5.83867e-13	2.46986e-13	0.158635	0.00204824	0.965	0.945	1.45009e-08	6.13414e-09	2.5283e-82	3.84356e-82	0.49077	0.0158079	0.963	0.9275	7.2451e-78	1.10141e-77	Congruent	UU
ENSMUSG00000020721	Helz	0.00869481	0.0081935	0.0532454	0.00648679	0.335	0.293	1	0	0.0156443	0.014919	0.0478141	0.0127636	0.361	0.32	1	0	Congruent	UU
ENSMUSG00000020723	Cacng4	1.95907e-06	7.69275e-07	0.0783123	0.0065029	0.282	0.2105	0.0486554	0.0191057	0.0147107	0.0128127	0.045858	0.0144518	0.229	0.199	1	0	Congruent	UU
ENSMUSG00000020728	Cep112	0.000110934	6.9898e-05	0.101144	0.00129596	0.214	0.1635	1	0	0.0214098	0.0142588	0.0463718	0.0103724	0.218	0.18725	1	0	Congruent	UU
ENSMUSG00000020740	Gga3	0.0109544	0.00211088	0.0374573	0	0.146	0.1175	1	0	2.30751e-06	2.45374e-06	0.0718021	0.00800524	0.153	0.10475	0.066124	0.0703143	Congruent	UU
ENSMUSG00000020741	Cluh	0.0206884	0.0216037	0.0264009	0.00853678	0.101	0.078	1	0	0.00176048	0.00165916	0.0416511	0.000527195	0.109	0.082	1	0	Congruent	UU
ENSMUSG00000020745	Pafah1b1	0.000367407	0.000180827	-0.117089	0.00707855	0.734	0.8025	1	0	0.369144	0.195627	-0.0496831	0.00414354	0.78	0.78625	1	0	Congruent	DD
ENSMUSG00000020774	Aspa	4.52233e-26	4.17558e-26	-0.339483	0.00732945	0.052	0.157	1.12317e-21	1.03705e-21	8.98553e-24	1.39117e-23	-0.320642	0.0191204	0.075	0.17325	2.57489e-19	3.98654e-19	Congruent	DD
ENSMUSG00000020776	Fbf1	0.00148207	2.50521e-05	0.0529582	0.000485896	0.143	0.109	1	0	3.74114e-05	2.21867e-05	0.0607606	0.003052	0.151	0.11075	0.815951	0.127089	Congruent	UU
ENSMUSG00000020777	Acox1	0.0246813	0.0107909	0.0071841	0.00847297	0.214	0.179	1	0	0.00016935	0.00028322	0.0645966	0.0101199	0.231	0.181	0.755383	0.489233	Congruent	UU
ENSMUSG00000020790	Ankfy1	0.853441	0.0695723	0.00782287	0.00310545	0.189	0.186	1	0	0.515314	0.264913	0.00608448	0.0091464	0.217	0.209	1	0	Congruent	UU
ENSMUSG00000020802	Ube2o	0.0325182	0.0309669	0.0423756	0.00654837	0.17	0.144	1	0	0.00788094	0.00327509	0.034701	0.00339434	0.164	0.13575	1	0	Congruent	UU
ENSMUSG00000020817	Rabep1	0.284233	0.0594678	-0.036162	0.0019751	0.541	0.5695	1	0	0.668556	0.249063	-0.0100441	0.0145052	0.599	0.60375	1	0	Congruent	DD
ENSMUSG00000020823	Sec14l1	8.19021e-14	9.88344e-14	0.218062	0.00450891	0.399	0.283	2.03412e-09	2.45465e-09	6.98774e-07	8.35546e-07	0.129801	0.014549	0.38	0.30925	0.0200241	0.0239434	Congruent	UU
ENSMUSG00000020827	Mink1	0.00541073	0.00282875	0.0258521	0.00667334	0.365	0.308	1	0	0.00148903	0.00288339	0.0858804	0.0234464	0.349	0.2925	0.750259	0.499482	Congruent	UU
ENSMUSG00000020841	Cpd	0.0317669	0.0135045	-0.100732	0.0012249	0.17	0.192	1	0	0.0558155	0.0618451	-0.0742204	0.0140913	0.179	0.2005	1	0	Congruent	DD
ENSMUSG00000020849	Ywhae	0.000148651	0.000193387	0.0748264	0.0109803	0.287	0.2265	0.647847	0.498019	2.40378e-05	4.21283e-05	0.0835473	0.0186381	0.306	0.24125	0.316264	0.472114	Congruent	UU
ENSMUSG00000020850	Prpf8	0.36675	0.0744997	0.00942204	0.00286422	0.13	0.12	1	0	4.56352e-09	4.64807e-09	0.0786523	0.00836605	0.159	0.0995	0.000130772	0.000133195	Congruent	UU
ENSMUSG00000020859	Spag9	4.67701e-06	4.33554e-06	-0.122822	0.00686676	0.697	0.792	0.116158	0.107677	0.00146548	0.00260044	-0.0872886	0.0201275	0.751	0.7955	1	0	Congruent	DD
ENSMUSG00000020873	Slc35b1	0.0208801	0.00217559	0.0355983	0.000494853	0.114	0.091	1	0	0.0767752	0.0358095	0.0234467	0.0017298	0.111	0.09425	1	0	Congruent	UU
ENSMUSG00000020882	Cacnb1	0.00011704	0.000120485	0.0620346	0.00389739	0.154	0.1105	0.895433	0.14788	0.000123172	0.00016659	0.0586166	0.00764462	0.137	0.09875	0.617712	0.448778	Congruent	UU
ENSMUSG00000020886	Dlg4	1.21375e-20	1.59346e-20	0.214301	0.00269285	0.314	0.183	3.01448e-16	3.95752e-16	3.24837e-06	6.32329e-06	0.107724	0.0177974	0.275	0.20925	0.0930852	0.1812	Congruent	UU
ENSMUSG00000020888	Dvl2	4.21495e-05	8.66749e-06	0.0640992	0.00101861	0.11	0.072	0.947305	0.0745221	5.05612e-05	9.69154e-05	0.0640721	0.00737145	0.115	0.07575	0.295618	0.476	Congruent	UU
ENSMUSG00000020893	Per1	2.8094e-10	2.18627e-10	0.128426	0.00192843	0.182	0.109	6.97742e-06	5.42983e-06	0.000112726	0.000187108	0.0760498	0.0114148	0.159	0.11675	0.591726	0.493743	Congruent	UU
ENSMUSG00000020894	Vamp2	0.00797562	0.00325832	0.0279899	0.00285487	0.147	0.116	1	0	1.77381e-05	2.83664e-05	0.0652734	0.0132206	0.156	0.10925	0.331047	0.46784	Congruent	UU
ENSMUSG00000020900	Myh10	1.28584e-15	4.31516e-16	0.21582	0.000772833	0.411	0.2905	3.19352e-11	1.07171e-11	5.10342e-06	8.04663e-06	0.0962859	0.0130775	0.391	0.3195	0.146244	0.230584	Congruent	UU
ENSMUSG00000020919	Stat5b	0.0255725	0.0185058	0.0244511	0.00697236	0.202	0.1695	1	0	0.000113107	0.000158971	0.0803871	0.0112502	0.221	0.17225	0.652016	0.467891	Congruent	UU
ENSMUSG00000020923	Ubtf	0.00271016	0.00260869	0.0635639	0.00497961	0.206	0.167	1	0	8.4365e-09	1.06526e-08	0.104371	0.00983489	0.2	0.13275	0.000241756	0.000305261	Congruent	UU
ENSMUSG00000020929	Eftud2	0.0657845	0.0215137	0.0243177	0.00244228	0.126	0.106	1	0	0.00980662	0.00691322	0.0382753	0.00811182	0.139	0.11325	1	0	Congruent	UU
ENSMUSG00000020936	Nmt1	0.0463934	0.0127261	0.0169467	0.00344351	0.212	0.183	1	0	7.73426e-06	1.02625e-05	0.0685717	0.00635414	0.231	0.17625	0.221633	0.294083	Congruent	UU
ENSMUSG00000020949	Fkbp3	0.000429963	0.000446671	0.0634311	0.0086862	0.156	0.1155	1	0	0.118964	0.197919	0.0306473	0.0118116	0.151	0.1305	1	0	Congruent	UU
ENSMUSG00000020950	Foxg1	0.000284527	0.000208419	0.0593103	0.00331138	0.177	0.133	1	0	0.00244274	0.00367754	0.0632264	0.0111874	0.181	0.14375	0.777709	0.444581	Congruent	UU
ENSMUSG00000020952	Scfd1	0.029812	0.00829633	0.0272497	0.00530403	0.203	0.173	1	0	0.394865	0.411952	0.0104466	0.0149291	0.217	0.20275	1	0	Congruent	UU
ENSMUSG00000020953	Coch	3.62181e-06	4.43867e-06	0.0891071	0.00535508	0.152	0.1005	0.0899512	0.110239	0.192939	0.140596	0.017445	0.00911361	0.118	0.10525	1	0	Congruent	UU
ENSMUSG00000020954	Strn3	0.0147898	0.00114127	-0.0749976	0.00259468	0.734	0.803	1	0	0.0117198	0.00967683	-0.0694824	0.00364272	0.785	0.8245	1	0	Congruent	DD
ENSMUSG00000020955	Ap4s1	0.00400331	0.00225598	0.046865	0.00276836	0.187	0.1505	1	0	0.00222076	0.00225755	0.0601583	0.0145664	0.204	0.16525	0.764935	0.470131	Congruent	UU
ENSMUSG00000020964	Sel1l	0.0210423	0.00144779	0.0167401	0.00303033	0.221	0.1855	1	0	1.0184e-05	1.12415e-05	0.0701856	0.0129402	0.267	0.2085	0.291832	0.322136	Congruent	UU
ENSMUSG00000020993	Trappc6b	0.960454	0.0368809	0.00791982	0.000935908	0.141	0.1415	1	0	0.010485	0.00551734	0.0395476	0.00268948	0.16	0.13225	1	0	Congruent	UU
ENSMUSG00000021000	Mia2	0.0240132	0.00557355	0.0240284	0.00126909	0.239	0.205	1	0	0.29954	0.212019	0.00576653	0.0145771	0.246	0.22725	1	0	Congruent	UU
ENSMUSG00000021003	Galc	0.388706	0.1636	0.00531764	0.00470545	0.145	0.1335	1	0	0.000505266	0.000651126	0.062305	0.0067096	0.183	0.14375	0.904011	0.191979	Congruent	UU
ENSMUSG00000021007	Spata7	0.034568	0.0158736	0.0498833	0.00234569	0.161	0.1355	1	0	0.333965	0.276345	0.0231692	0.00901234	0.157	0.1465	1	0	Congruent	UU
ENSMUSG00000021010	Npas3	3.87421e-16	1.53826e-16	-0.738373	0.0190492	0.211	0.315	9.62199e-12	3.82042e-12	4.27556e-08	6.78288e-08	-0.306066	0.0436261	0.224	0.2945	0.00122521	0.0019437	Congruent	DD
ENSMUSG00000021012	Zc3h14	0.00221904	0.00249416	0.0692088	0.00864164	0.253	0.209	1	0	0.00505482	0.00564604	0.0477855	0.0237814	0.265	0.221	0.754144	0.491713	Congruent	UU
ENSMUSG00000021013	Ttc8	4.70615e-06	4.3302e-07	0.0926037	0.000408628	0.308	0.2395	0.116882	0.0107545	0.00153452	0.00263021	0.0686252	0.0120985	0.316	0.27	1	0	Congruent	UU
ENSMUSG00000021024	Psma6	0.0280257	0.0210386	0.0271389	0.00397328	0.105	0.0825	1	0	0.160075	0.193182	0.0233345	0.014548	0.106	0.09	1	0	Congruent	UU
ENSMUSG00000021036	Sptlc2	0.271382	0.0437859	-0.0556836	0.00181762	0.131	0.141	1	0	0.253117	0.146423	-0.0362291	0.0112094	0.144	0.15425	1	0	Congruent	DD
ENSMUSG00000021038	Vipas39	0.687966	0.356182	0.00238861	0.00817077	0.123	0.1185	1	0	0.0017205	0.00289408	0.0550473	0.0081373	0.158	0.12175	0.821518	0.356964	Congruent	UU
ENSMUSG00000021047	Nova1	1.63599e-09	1.54235e-09	0.162111	0.00551428	0.404	0.3035	4.06315e-05	3.83057e-05	1.00733e-05	1.35476e-05	0.100072	0.0125624	0.403	0.3325	0.288659	0.388221	Congruent	UU
ENSMUSG00000021048	Mthfd1	0.0121674	0.00647306	0.0315632	0.00142511	0.157	0.1275	1	0	0.000923012	0.000817454	0.0437549	0.00623647	0.16	0.12475	1	0	Congruent	UU
ENSMUSG00000021051	Ppp2r5e	0.124847	0.0140529	-0.00280721	0.00324713	0.345	0.311	1	0	0.585972	0.2664	-0.0429022	0.00582645	0.376	0.37325	1	0	Congruent	DD
ENSMUSG00000021057	Akap5	0.0225197	0.0158852	0.0310648	0.00690619	0.119	0.0945	1	0	0.0109269	0.00621485	0.0350386	0.0045093	0.151	0.125	1	0	Congruent	UU
ENSMUSG00000021061	Sptb	5.20999e-07	7.80461e-08	0.118628	0.00045654	0.235	0.1715	0.0129395	0.00193835	0.030103	0.0202269	0.0429147	0.0050289	0.234	0.20775	1	0	Congruent	UU
ENSMUSG00000021062	Rab15	8.22472e-07	8.86758e-07	0.0770845	0.00495455	0.15	0.096	0.0204269	0.0220235	0.0018051	0.00229464	0.04373	0.00505444	0.137	0.1055	1	0	Congruent	UU
ENSMUSG00000021066	Atl1	0.0356204	0.024816	0.0216068	0.00548123	0.244	0.212	1	0	8.70492e-06	1.51171e-05	0.0927758	0.0186301	0.294	0.2315	0.249448	0.433196	Congruent	UU
ENSMUSG00000021068	Nin	0.34049	0.010519	0.0598088	0.0031064	0.518	0.5255	1	0	0.606258	0.0528793	0.00851525	0.00424177	0.586	0.588	1	0	Congruent	UU
ENSMUSG00000021076	Actr10	0.0196335	0.0101963	0.0313096	0.00144393	0.14	0.1135	1	0	0.00112353	0.00165212	0.0565776	0.00396173	0.158	0.12325	1	0	Congruent	UU
ENSMUSG00000021079	Timm9	0.253866	0.0307669	0.019445	0.00276836	0.169	0.1555	1	0	0.109639	0.0943813	0.0178263	0.0107179	0.207	0.18625	1	0	Congruent	UU
ENSMUSG00000021087	Rtn1	5.55206e-39	4.08034e-39	0.360764	0.000376644	0.923	0.9065	1.37891e-34	1.01339e-34	9.92762e-09	1.09662e-08	0.151574	0.0149549	0.922	0.92525	0.000284486	0.000314248	Congruent	UU
ENSMUSG00000021096	Ppm1a	0.26274	0.0379617	0.0165373	0.00087117	0.212	0.196	1	0	0.199906	0.107891	0.0265548	0.0115377	0.243	0.2265	1	0	Congruent	UU
ENSMUSG00000021097	Clmn	1.35133e-05	6.0055e-06	-0.172363	0.00250649	0.088	0.1295	0.335616	0.149152	2.26031e-08	3.7744e-08	-0.169166	0.0228153	0.091	0.14575	0.000647713	0.00108159	Congruent	DD
ENSMUSG00000021108	Prkch	9.74917e-15	9.42407e-15	0.167829	0.00714011	0.261	0.157	2.4213e-10	2.34056e-10	3.54392e-07	7.0236e-07	0.10642	0.0125873	0.279	0.20275	0.0101555	0.0201268	Congruent	UU
ENSMUSG00000021109	Hif1a	0.0256305	0.0103494	0.0305599	0.00610442	0.158	0.131	1	0	0.00209506	0.00223595	0.0551229	0.00974082	0.198	0.1605	1	0	Congruent	UU
ENSMUSG00000021112	Pals1	0.283484	0.111019	-0.0481983	0.00894081	0.13	0.14	1	0	0.321673	0.140876	-0.00168045	0.0044231	0.164	0.15175	1	0	Congruent	DD
ENSMUSG00000021113	Snapc1	0.0780857	0.0420672	0.0256093	0.0019751	0.113	0.0945	1	0	0.00295091	0.00483421	0.0422254	0.00303498	0.122	0.09325	1	0	Congruent	UU
ENSMUSG00000021114	Atp6v1d	4.52993e-09	1.04576e-10	0.099164	0.000463805	0.216	0.141	0.000112505	2.59725e-06	0.00161017	0.00271306	0.0657732	0.0158062	0.217	0.1755	0.833751	0.332498	Congruent	UU
ENSMUSG00000021115	Vrk1	0.00043243	0.000404712	0.0578226	0.010762	0.209	0.161	1	0	0.050013	0.0745765	0.0530242	0.0242662	0.224	0.192	0.876608	0.246784	Congruent	UU
ENSMUSG00000021124	Vti1b	0.890129	0.0424537	-0.0148648	0.00348617	0.188	0.187	1	0	0.650074	0.404544	-0.0196321	0.0187819	0.202	0.1925	1	0	Congruent	DD
ENSMUSG00000021130	Galnt16	0.08786	0.0457117	0.0127883	0.000956082	0.119	0.1	1	0	0.0157898	0.0162558	0.0386132	0.0116234	0.128	0.10425	1	0	Congruent	UU
ENSMUSG00000021133	Susd6	0.393161	0.0691167	-0.0215771	0.00445476	0.166	0.153	1	0	0.818093	0.119633	-0.0230613	0.0114608	0.171	0.168	1	0	Congruent	DD
ENSMUSG00000021140	Pcnx	0.00121314	8.26235e-05	0.0748513	0.00155213	0.329	0.277	1	0	0.00452252	0.00550291	0.0482948	0.0127622	0.369	0.321	1	0	Congruent	UU
ENSMUSG00000021143	Pacs2	1.11831e-07	5.47353e-08	-0.250703	0.00406357	0.141	0.1995	0.00277744	0.00135941	0.00374386	0.00431726	-0.0978298	0.0132354	0.146	0.1745	1	0	Congruent	DD
ENSMUSG00000021147	Wdr37	0.0124173	9.90889e-05	0.0239639	0.00201013	0.286	0.242	1	0	0.0551107	0.104731	0.0428138	0.0209401	0.336	0.29725	1	0	Congruent	UU
ENSMUSG00000021156	Zmynd11	0.53014	0.0543092	0.0300148	0.00238281	0.53	0.528	1	0	0.0754062	0.0772278	0.0421603	0.0200133	0.63	0.61375	1	0	Congruent	UU
ENSMUSG00000021180	Rps6ka5	8.80046e-05	8.4312e-05	0.104278	0.0108784	0.45	0.377	0.85251	0.208582	0.000389457	0.000418554	0.0853657	0.00928978	0.491	0.42825	0.786807	0.426386	Congruent	UU
ENSMUSG00000021182	Ccdc88c	4.15366e-06	4.26346e-06	0.101297	0.00486554	0.298	0.2275	0.10316	0.105887	0.000100143	0.00016351	0.0880368	0.0209673	0.299	0.2415	0.650999	0.44644	Congruent	UU
ENSMUSG00000021188	Trip11	0.237139	0.115951	-0.0617434	0.00913068	0.205	0.2155	1	0	0.413947	0.18062	-0.0499034	0.00397836	0.261	0.26625	1	0	Congruent	DD
ENSMUSG00000021190	Lgmn	0.0112134	0.00751559	-0.104276	0.00858214	0.094	0.118	1	0	0.293004	0.166887	-0.0368909	0.00872921	0.105	0.11375	1	0	Congruent	DD
ENSMUSG00000021196	Pfkp	0.00147904	0.000790681	0.0729882	0.00173567	0.247	0.2045	1	0	0.000548675	0.00088472	0.0762602	0.00904755	0.268	0.2215	0.856701	0.286598	Congruent	UU
ENSMUSG00000021198	Unc79	2.44103e-25	1.06563e-25	0.271651	0	0.903	0.917	6.06253e-21	2.6466e-21	1.62406e-06	3.03583e-06	0.116758	0.0214898	0.935	0.9435	0.046539	0.0869949	Congruent	UU
ENSMUSG00000021209	Ppp4r4	2.51624e-13	6.58887e-15	0.176164	0.00213121	0.43	0.3085	6.24933e-09	1.63641e-10	0.0115044	0.0200071	0.0565646	0.0195271	0.415	0.3655	1	0	Congruent	UU
ENSMUSG00000021224	Numb	0.332627	0.0527984	-0.0901281	0.00101557	0.328	0.2995	1	0	0.00265258	0.00374002	-0.0816687	0.0231713	0.391	0.43875	0.927261	0.145477	Congruent	DD
ENSMUSG00000021241	Isca2	0.0439335	0.004954	0.0223842	0.00147242	0.115	0.094	1	0	0.000465332	0.000789452	0.0428043	0.00737374	0.128	0.09275	0.967845	0.0643097	Congruent	UU
ENSMUSG00000021248	Tmed10	0.122186	0.0783956	-0.0539976	0.000459833	0.115	0.13	1	0	0.749062	0.171064	-0.012514	0.00750243	0.131	0.13	1	0	Congruent	DD
ENSMUSG00000021258	Ccnk	0.294691	0.176287	0.0217205	0.00499091	0.1	0.09	1	0	0.00280827	0.00291944	0.0373771	0.00577684	0.105	0.07875	1	0	Congruent	UU
ENSMUSG00000021259	Cyp46a1	6.8893e-18	5.07327e-18	0.203137	0.00177802	0.305	0.186	1.71103e-13	1.26e-13	3.08242e-06	3.20848e-06	0.102207	0.010761	0.248	0.18875	0.0883299	0.0919423	Congruent	UU
ENSMUSG00000021262	Evl	1.7801e-05	1.7043e-05	0.100909	0.00498238	0.304	0.2425	0.442107	0.42328	0.117304	0.128601	0.00929122	0.0173071	0.319	0.28925	1	0	Congruent	UU
ENSMUSG00000021268	Meg3	2.65205e-54	3.75056e-54	0.484831	0.0261772	0.995	0.986	6.58664e-50	9.3149e-50	3.43318e-28	3.99998e-28	0.310511	0.0143518	0.997	0.9955	9.83813e-24	1.14623e-23	Congruent	UU
ENSMUSG00000021270	Hsp90aa1	6.54345e-14	8.90205e-14	0.153939	0.00493647	0.362	0.237	1.62513e-09	2.21091e-09	0.140251	0.152895	0.0247198	0.0221097	0.312	0.28675	1	0	Congruent	UU
ENSMUSG00000021275	Tecpr2	0.21924	0.0518928	-0.0132721	0.00227862	0.156	0.1385	1	0	0.438265	0.166383	-0.0095117	0.0174532	0.158	0.15175	1	0	Congruent	DD
ENSMUSG00000021277	Traf3	0.0819362	0.0371313	0.0109516	0.00690452	0.21	0.1835	1	0	0.131133	0.0984366	0.02486	0.00972254	0.213	0.1935	1	0	Congruent	UU
ENSMUSG00000021279	Cdc42bpb	0.586997	0.142677	-0.00622323	0.00439337	0.189	0.1795	1	0	0.312347	0.310584	-0.00442888	0.0156236	0.187	0.16975	1	0	Congruent	DD
ENSMUSG00000021282	Eif5	0.000342274	0.000180923	0.0598293	0.000919045	0.193	0.1485	1	0	0.0279738	0.0231089	0.019181	0.00901903	0.204	0.175	1	0	Congruent	UU
ENSMUSG00000021285	Ppp1r13b	3.10389e-06	5.66544e-07	0.081958	0.00200775	0.312	0.2395	0.0770882	0.0140707	1.10193e-05	1.55299e-05	0.093258	0.0162866	0.337	0.2705	0.315769	0.445025	Congruent	UU
ENSMUSG00000021288	Klc1	1.30446e-09	1.4331e-09	0.144784	0.00671797	0.351	0.2575	3.23975e-05	3.55924e-05	4.17683e-08	8.2764e-08	0.116032	0.0108311	0.378	0.29025	0.00119691	0.00237168	Congruent	UU
ENSMUSG00000021301	Hecw1	0.0803347	0.0199386	0.0923728	0.000320446	0.504	0.5135	1	0	0.499188	0.364894	0.00811205	0.0194194	0.617	0.65375	1	0	Congruent	UU
ENSMUSG00000021311	Mtr	0.067898	0.0252702	0.0251899	0.00299454	0.103	0.086	1	0	0.113701	0.138887	0.010868	0.00761116	0.113	0.096	1	0	Congruent	UU
ENSMUSG00000021314	Amph	0.856354	0.107935	-0.0407083	0.00337907	0.327	0.313	1	0	3.80893e-09	5.0373e-09	-0.148351	0.00855891	0.496	0.5765	0.000109149	0.000144349	Congruent	DD
ENSMUSG00000021318	Gli3	0.0960515	0.0541727	0.0072243	0.0047247	0.22	0.1945	1	0	0.115024	0.0763997	0.0478761	0.0160991	0.194	0.17575	1	0	Congruent	UU
ENSMUSG00000021327	Zkscan3	0.440926	0.296482	-0.0151056	0.0106393	0.24	0.223	1	0	0.325949	0.253002	-0.00603913	0.0192099	0.243	0.22525	1	0	Congruent	DD
ENSMUSG00000021339	Mrs2	0.721891	0.180039	-0.020649	0.001933	0.109	0.112	1	0	0.845793	0.263421	-0.00470667	0.00688103	0.121	0.1225	1	0	Congruent	DD
ENSMUSG00000021357	Exoc2	0.443522	0.0175433	-0.00630881	0.00356225	0.18	0.168	1	0	0.6976	0.10465	-0.0148753	0.0102217	0.224	0.21725	1	0	Congruent	DD
ENSMUSG00000021360	Gcnt2	1.79667e-05	7.2483e-06	0.0625658	0.000941957	0.172	0.121	0.446222	0.180019	0.0936504	0.0565225	0.0293495	0.00557618	0.171	0.15175	1	0	Congruent	UU
ENSMUSG00000021373	Cap2	1.57609e-07	6.81659e-08	0.121375	0.00149855	0.383	0.3025	0.00391437	0.00169297	0.116631	0.154993	0.0495843	0.0147345	0.527	0.507	1	0	Congruent	UU
ENSMUSG00000021374	Nup153	0.0532284	0.0351453	0.0270624	0.00269522	0.188	0.162	1	0	0.0245865	0.00808587	0.037314	0.00582698	0.224	0.1965	1	0	Congruent	UU
ENSMUSG00000021375	Kif13a	5.33264e-10	4.42207e-10	-0.301752	0.0102295	0.198	0.2705	1.32442e-05	1.09826e-05	0.00025253	0.000359915	-0.212819	0.0156077	0.223	0.26	0.695201	0.357371	Congruent	DD
ENSMUSG00000021377	Dek	0.0591876	0.0174437	0.00738002	0.00475369	0.135	0.1125	1	0	0.134085	0.117455	0.0145753	0.00587677	0.146	0.12925	1	0	Congruent	UU
ENSMUSG00000021395	Spin1	0.00522486	0.00320218	0.049685	0.00289813	0.148	0.1165	1	0	0.0873124	0.109928	0.0170577	0.00707543	0.156	0.13575	1	0	Congruent	UU
ENSMUSG00000021420	Fars2	7.41335e-06	2.27403e-06	0.0814502	0.00147206	0.367	0.294	0.184118	0.0564779	0.519704	0.172327	0.0239972	0.00942305	0.403	0.388	1	0	Congruent	UU
ENSMUSG00000021427	Ssr1	0.00577661	0.00271426	0.017279	0.00240997	0.131	0.1	1	0	0.0618592	0.0426781	0.0222714	0.00546162	0.127	0.1075	1	0	Congruent	UU
ENSMUSG00000021428	Riok1	0.14282	0.00716631	0.0187156	0.00295979	0.107	0.0925	1	0	0.0330046	0.0282235	0.0274482	0.00781271	0.113	0.0925	1	0	Congruent	UU
ENSMUSG00000021451	Sema4d	0.0436637	0.0355856	-0.105728	0.00837811	0.111	0.129	1	0	0.689007	0.310846	-0.00360222	0.0167849	0.109	0.1095	1	0	Congruent	DD
ENSMUSG00000021458	Aopep	0.0401655	0.013763	-0.0793952	0.00174333	0.488	0.515	1	0	0.0368917	0.0244121	-0.0630279	0.0114447	0.587	0.624	1	0	Congruent	DD
ENSMUSG00000021460	Auh	0.198864	0.06165	-0.0357679	0.0051369	0.122	0.1345	1	0	0.566948	0.288882	-0.0206256	0.00909913	0.127	0.1305	1	0	Congruent	DD
ENSMUSG00000021466	Ptch1	9.10999e-11	6.88177e-11	0.123167	0.00267402	0.259	0.17	2.26256e-06	1.70916e-06	0.00229795	0.00309538	0.0520534	0.0144884	0.24	0.19875	0.939239	0.121522	Congruent	UU
ENSMUSG00000021468	Sptlc1	0.0213813	0.00146032	0.0385297	0.00290638	0.133	0.108	1	0	0.00195617	0.00266289	0.0504292	0.00855968	0.139	0.10725	1	0	Congruent	UU
ENSMUSG00000021474	Sfxn1	0.49685	0.268886	0.0068563	0.00582661	0.114	0.1065	1	0	0.011845	0.0140525	0.0523519	0.0120025	0.131	0.104	1	0	Congruent	UU
ENSMUSG00000021477	Ctsl	0.0358186	0.00695232	0.0174108	0.00339966	0.106	0.0845	1	0	0.0255999	0.0253461	0.0310485	0.00910289	0.105	0.0845	1	0	Congruent	UU
ENSMUSG00000021478	Drd1	3.95638e-14	4.12322e-14	0.217569	0.00408874	0.239	0.1445	9.82606e-10	1.02404e-09	8.9015e-07	9.57375e-07	0.121769	0.0105997	0.212	0.156	0.0255081	0.0274345	Congruent	UU
ENSMUSG00000021488	Nsd1	5.0622e-05	3.75665e-05	-0.116738	0.0111104	0.643	0.72	0.798759	0.284598	0.0592951	0.0691606	-0.0652007	0.0158817	0.71	0.741	1	0	Congruent	DD
ENSMUSG00000021493	Pdlim7	1.14886e-08	6.09558e-09	0.110855	0.000964215	0.191	0.124	0.000285332	0.00015139	1.58853e-11	1.95865e-11	0.112377	0.0066155	0.161	0.094	4.55208e-07	5.61272e-07	Congruent	UU
ENSMUSG00000021495	Fam193b	0.165856	0.0859749	0.00190454	0.00537624	0.175	0.1545	1	0	0.148008	0.126224	0.0262532	0.00936449	0.195	0.17675	1	0	Congruent	UU
ENSMUSG00000021497	Txndc15	0.270278	0.00955014	0.00671022	0	0.134	0.1205	1	0	0.0128762	0.0142801	0.0434533	0.0118264	0.136	0.10975	1	0	Congruent	UU
ENSMUSG00000021500	Ddx46	0.0532329	0.0504843	0.0430515	0.0107431	0.195	0.168	1	0	0.154119	0.213105	0.00934969	0.0135756	0.222	0.1975	1	0	Congruent	UU
ENSMUSG00000021536	Adcy2	0.585877	0.30011	-0.0318428	0.0154375	0.113	0.1185	1	0	0.469075	0.155476	-0.0138386	0.0219334	0.177	0.18275	1	0	Congruent	DD
ENSMUSG00000021537	Cetn3	0.19307	0.0212373	0.0210275	0.000475479	0.147	0.1315	1	0	0.0256279	0.0243347	0.0361485	0.00501599	0.166	0.14	1	0	Congruent	UU
ENSMUSG00000021546	Hnrnpk	0.00299617	0.00298759	0.063404	0.00717289	0.298	0.252	1	0	2.28042e-12	4.17424e-12	0.14013	0.00812283	0.34	0.24225	6.53478e-08	1.19617e-07	Congruent	UU
ENSMUSG00000021555	Naa35	0.00912652	0.00119595	0.0248007	0.00707287	0.151	0.12	1	0	0.00656125	0.00458783	0.038761	0.0051173	0.174	0.14275	1	0	Congruent	UU
ENSMUSG00000021559	Dapk1	3.22322e-08	3.8906e-08	0.145906	0.0103704	0.499	0.4165	0.00080052	0.000966268	1.85262e-08	2.87357e-08	0.147026	0.0154252	0.467	0.385	0.000530888	0.00082345	Congruent	UU
ENSMUSG00000021577	Sdha	0.00464742	0.00398882	0.0480907	0.00628609	0.206	0.1675	1	0	0.249716	0.192411	0.01166	0.0116406	0.211	0.1945	1	0	Congruent	UU
ENSMUSG00000021589	Rhobtb3	0.295906	0.0255893	-0.0352531	0.00378882	0.102	0.112	1	0	0.386443	0.251897	-0.0157475	0.0031613	0.102	0.11	1	0	Congruent	DD
ENSMUSG00000021595	Nsun2	0.00714577	0.00115504	0.0311613	0.00140677	0.164	0.1305	1	0	0.0243849	0.0407269	0.0342036	0.0129222	0.172	0.14225	1	0	Congruent	UU
ENSMUSG00000021596	Mctp1	5.6612e-18	6.70594e-18	0.253374	0.00905249	0.85	0.8405	1.40601e-13	1.66549e-13	0.00406596	0.00561646	0.0927818	0.0107452	0.882	0.903	1	0	Congruent	UU
ENSMUSG00000021597	Slf1	3.11104e-06	1.36366e-06	0.100203	0.000404256	0.316	0.2475	0.0772658	0.0338679	0.613365	0.165193	0.000752087	0.0134239	0.314	0.3085	1	0	Congruent	UU
ENSMUSG00000021614	Vcan	0.526611	0.0436681	-0.123035	0.0195153	0.112	0.116	1	0	0.803579	0.200229	-0.0348342	0.0250718	0.118	0.11625	1	0	Congruent	DD
ENSMUSG00000021615	Xrcc4	0.0685907	0.0421873	0.0180352	0.00854922	0.318	0.284	1	0	0.0685908	0.063354	0.0353761	0.0165413	0.346	0.316	1	0	Congruent	UU
ENSMUSG00000021621	Zcchc9	0.617367	0.0310321	0.00101957	0.00144189	0.122	0.1155	1	0	0.147101	0.132941	0.0174974	0.0119435	0.128	0.11125	1	0	Congruent	UU
ENSMUSG00000021629	Slc30a5	0.0903571	0.0363954	0.0339394	0.00666449	0.145	0.1255	1	0	0.200441	0.179462	0.0323958	0.0127935	0.152	0.137	1	0	Congruent	UU
ENSMUSG00000021646	Mccc2	0.0867339	0.0346239	0.0134611	0.00343234	0.116	0.0975	1	0	0.00184665	0.00236565	0.061633	0.0194139	0.136	0.0985	0.517491	0.557855	Congruent	UU
ENSMUSG00000021662	Arhgef28	5.2006e-07	4.48432e-07	-0.206049	0	0.087	0.1355	0.0129162	0.0111373	5.29633e-09	6.33399e-09	-0.206449	0.0141676	0.095	0.151	0.000151772	0.000181507	Congruent	DD
ENSMUSG00000021665	Hexb	5.2374e-06	2.36545e-06	-0.149517	0.023219	0.202	0.1375	0.130076	0.0587482	0.308318	0.197839	-0.0291975	0.0146741	0.129	0.1165	1	0	Congruent	DD
ENSMUSG00000021670	Hmgcr	3.56666e-13	3.09169e-13	0.152931	0.00140547	0.214	0.125	8.85817e-09	7.67852e-09	0.297769	0.27233	0.0180598	0.0109772	0.166	0.15425	1	0	Congruent	UU
ENSMUSG00000021676	Iqgap2	3.00483e-08	4.15231e-08	0.126651	0.0115321	0.242	0.1665	0.000746279	0.00103127	0.00251858	0.00354617	0.0550773	0.011955	0.256	0.2125	1	0	Congruent	UU
ENSMUSG00000021684	Pde8b	0.000603475	0.000384517	0.111767	0.00473603	0.713	0.723	1	0	1.28639e-05	1.93041e-05	0.115564	0.0134948	0.803	0.78575	0.320659	0.458155	Congruent	UU
ENSMUSG00000021686	Ap3b1	0.100238	0.0257276	-0.104418	0.0078115	0.262	0.2755	1	0	0.266596	0.23739	-0.0557057	0.0137994	0.305	0.31725	1	0	Congruent	DD
ENSMUSG00000021687	Scamp1	0.000363696	6.65683e-05	0.0554572	0.00207135	0.281	0.227	1	0	0.000120918	0.000221874	0.0859278	0.0202331	0.337	0.27325	0.469476	0.541296	Congruent	UU
ENSMUSG00000021692	Dimt1	0.0682834	0.023416	0.0302469	0.00339966	0.133	0.113	1	0	0.170684	0.269223	0.0282383	0.0198505	0.138	0.1175	1	0	Congruent	UU
ENSMUSG00000021693	Kif2a	0.480218	0.0199045	0.00410214	0.00248916	0.234	0.223	1	0	0.043751	0.0741086	0.0336889	0.0151281	0.257	0.22475	1	0	Congruent	UU
ENSMUSG00000021701	Plk2	3.32818e-17	6.34326e-18	0.231714	0	0.297	0.1835	8.26586e-13	1.57541e-13	6.28377e-10	1.25116e-09	0.160154	0.020695	0.332	0.24225	1.80068e-05	3.58531e-05	Congruent	UU
ENSMUSG00000021703	Serinc5	0.0533799	0.0290499	-0.0890916	0.00908265	0.17	0.191	1	0	0.695499	0.258728	-0.0380824	0.0118289	0.189	0.186	1	0	Congruent	DD
ENSMUSG00000021706	Zfyve16	0.0348238	0.00864246	0.0166349	0.00182005	0.175	0.1465	1	0	0.498647	0.378507	0.0052068	0.0213391	0.178	0.167	1	0	Congruent	UU
ENSMUSG00000021708	Rasgrf2	0.609662	0.375909	-0.0812261	0.0193647	0.122	0.125	1	0	0.494502	0.346279	-0.0215742	0.0201945	0.125	0.11975	1	0	Congruent	DD
ENSMUSG00000021709	Erbin	5.20549e-13	8.60921e-14	-0.395425	0.00708895	0.388	0.47	1.29284e-08	2.13818e-09	5.47628e-15	1.07626e-14	-0.407553	0.0115142	0.411	0.49625	1.56928e-10	3.08413e-10	Congruent	DD
ENSMUSG00000021711	Trappc13	0.0352035	0.0207263	0.0321271	0.00338515	0.135	0.111	1	0	0.000498499	0.000250324	0.0533363	0.00423989	0.154	0.119	1	0	Congruent	UU
ENSMUSG00000021720	Rnf180	0.091871	0.0215253	0.030444	0.00571262	0.196	0.1745	1	0	0.140073	0.0693944	0.0196952	0.00485952	0.208	0.18875	1	0	Congruent	UU
ENSMUSG00000021733	Slc4a7	0.188946	0.0990544	0.00913735	0.00690745	0.207	0.187	1	0	0.00373123	0.00357318	0.0371297	0.0157269	0.234	0.193	0.984842	0.030316	Congruent	UU
ENSMUSG00000021738	Atxn7	0.0226343	0.0181235	0.0255622	0.00593599	0.239	0.2035	1	0	0.014794	0.0155167	0.0212995	0.0174027	0.258	0.22225	1	0	Congruent	UU
ENSMUSG00000021748	Pdhb	0.0651466	0.0479454	0.0193695	0.00492346	0.112	0.0925	1	0	0.00625929	0.00467994	0.0411575	0.00573928	0.128	0.10125	1	0	Congruent	UU
ENSMUSG00000021764	Ndufs4	0.00779331	0.000411079	0.0606324	0.00252614	0.262	0.225	1	0	0.155926	0.207021	0.0108086	0.0118681	0.31	0.2835	1	0	Congruent	UU
ENSMUSG00000021770	Samd8	0.0767794	0.0425294	0.0109126	0.00328548	0.147	0.1255	1	0	0.296539	0.247259	0.0192887	0.00872201	0.155	0.14225	1	0	Congruent	UU
ENSMUSG00000021771	Vdac2	0.00567538	0.00498288	0.0413889	0.00292025	0.134	0.1025	1	0	0.00780045	0.0132755	0.0385503	0.0136106	0.139	0.10825	1	0	Congruent	UU
ENSMUSG00000021772	Nkiras1	0.000133647	0.000103398	0.0619896	0.00398104	0.127	0.0875	1	0	0.342958	0.247912	0.00777293	0.0117537	0.114	0.10275	1	0	Congruent	UU
ENSMUSG00000021775	Nr1d2	0.266143	0.0645662	0.00705009	0.0024983	0.24	0.2225	1	0	0.00079205	0.000911218	0.0670967	0.0090373	0.33	0.279	0.89215	0.215701	Congruent	UU
ENSMUSG00000021794	Glud1	0.350193	0.243909	0.00653103	0.00923627	0.147	0.134	1	0	0.155375	0.0926906	0.0363512	0.00964517	0.164	0.14925	1	0	Congruent	UU
ENSMUSG00000021796	Bmpr1a	0.0066129	0.00467022	0.0394685	0.0113112	0.301	0.256	1	0	0.0485939	0.0573766	0.039799	0.0216963	0.348	0.3065	1	0	Congruent	UU
ENSMUSG00000021816	Ppp3cb	4.50995e-09	2.55183e-09	0.119408	0.000360028	0.418	0.3145	0.000112009	6.33772e-05	0.0601903	0.0404423	0.0334624	0.0122192	0.438	0.40625	1	0	Congruent	UU
ENSMUSG00000021820	Camk2g	0.193676	0.00746486	0.00298162	0.00328095	0.132	0.117	1	0	0.00110234	0.00111192	0.060507	0.0194119	0.132	0.09825	0.763489	0.473021	Congruent	UU
ENSMUSG00000021823	Vcl	0.000274648	3.97847e-05	0.0590114	0.00327624	0.259	0.207	1	0	0.00112874	0.00154653	0.0980644	0.0178317	0.302	0.25425	0.634221	0.423855	Congruent	UU
ENSMUSG00000021830	Txndc16	0.806661	0.0985109	-0.0849203	0.017276	0.291	0.2805	1	0	0.73853	0.285047	-0.034102	0.0167189	0.362	0.348	1	0	Congruent	DD
ENSMUSG00000021831	Ero1a	0.561789	0.082313	0.00975825	0.000477482	0.134	0.127	1	0	0.56891	0.431521	0.0176131	0.0127562	0.148	0.14175	1	0	Congruent	UU
ENSMUSG00000021832	Psmc6	0.0881158	0.0435492	0.0167275	0.00994001	0.216	0.191	1	0	0.114609	0.0794885	0.00879826	0.00855383	0.242	0.218	1	0	Congruent	UU
ENSMUSG00000021838	Samd4	3.17603e-07	2.67806e-07	-0.195559	0.00732391	0.158	0.218	0.00788798	0.00665124	0.301155	0.204065	-0.0622804	0.00634248	0.189	0.1985	1	0	Congruent	DD
ENSMUSG00000021852	Slc35f4	0.154978	0.0815284	0.0411324	0.00578421	0.215	0.1955	1	0	0.475823	0.307685	0.000977277	0.0305009	0.312	0.327	1	0	Congruent	UU
ENSMUSG00000021877	Arf4	0.00720245	0.00197315	0.0578057	0.00683589	0.18	0.147	1	0	0.136079	0.210402	0.0180535	0.0160843	0.172	0.15	1	0	Congruent	UU
ENSMUSG00000021910	Nisch	0.00477233	0.000690993	0.0539765	0.000276798	0.575	0.538	1	0	2.10198e-32	4.20273e-32	0.314712	0.0193785	0.546	0.374	6.02344e-28	1.20433e-27	Congruent	UU
ENSMUSG00000021911	Parg	0.217419	0.0992461	-0.0686299	0.00940227	0.248	0.258	1	0	0.757501	0.315149	-0.0468588	0.0116028	0.288	0.28475	1	0	Congruent	DD
ENSMUSG00000021916	Glt8d1	0.622968	0.172211	-0.0547393	0.0110908	0.207	0.209	1	0	0.568827	0.34299	-0.00133149	0.0139568	0.215	0.20475	1	0	Congruent	DD
ENSMUSG00000021917	Spcs1	0.0148906	0.00327553	0.0357131	0.00322465	0.166	0.135	1	0	0.0188373	0.0167312	0.0268292	0.00918777	0.131	0.10675	1	0	Congruent	UU
ENSMUSG00000021918	Nek4	0.404975	0.173379	0.00930053	0.00537302	0.11	0.101	1	0	0.00184927	0.000707836	0.0409593	0.00247369	0.121	0.09325	1	0	Congruent	UU
ENSMUSG00000021938	Pspc1	0.0144435	0.00208836	0.0232706	0.00216361	0.371	0.3205	1	0	0.00568661	0.00794712	0.0389937	0.0192846	0.426	0.37275	1	0	Congruent	UU
ENSMUSG00000021939	Ctsb	4.20399e-08	5.71865e-08	0.0949881	0.0109377	0.272	0.188	0.0010441	0.00142028	0.0138897	0.0163705	0.0535789	0.0197202	0.219	0.1835	1	0	Congruent	UU
ENSMUSG00000021958	Pinx1	0.0926556	0.0172955	0.0228846	0.00197702	0.114	0.0965	1	0	0.580031	0.319678	0.0106471	0.00667901	0.111	0.1075	1	0	Congruent	UU
ENSMUSG00000021969	Zdhhc20	0.000350606	0.000250422	-0.228511	0.00468456	0.282	0.32	1	0	0.189901	0.107764	-0.112106	0.0179715	0.341	0.34625	1	0	Congruent	DD
ENSMUSG00000021972	Hmbox1	0.085151	0.00791595	0.0163962	0.00114687	0.318	0.2875	1	0	0.00337545	0.000349959	0.0524322	0.00534781	0.368	0.324	1	0	Congruent	UU
ENSMUSG00000021973	Micu2	0.0545795	0.00845062	-0.0706403	0.00222592	0.138	0.1575	1	0	0.627433	0.0436954	-0.00768347	0.0116093	0.171	0.167	1	0	Congruent	DD
ENSMUSG00000021975	Ints9	0.368891	0.0206058	0.0162433	0.000491515	0.105	0.0955	1	0	0.571149	0.35634	0.00780176	0.00816355	0.117	0.11025	1	0	Congruent	UU
ENSMUSG00000021981	Cab39l	0.367903	0.239321	-0.0409181	0.00654837	0.114	0.1225	1	0	0.7026	0.162181	-0.0207519	0.00820154	0.135	0.13725	1	0	Congruent	DD
ENSMUSG00000021990	Spata13	0.449415	0.217037	0.00158153	0.0066807	0.182	0.169	1	0	0.0102111	0.00610053	0.0420891	0.0043659	0.179	0.15	1	0	Congruent	UU
ENSMUSG00000021991	Cacna2d3	6.4504e-31	5.02673e-31	0.412082	0.00483479	0.944	0.936	1.60202e-26	1.24844e-26	2.58016e-09	2.89533e-09	0.189764	0.0239525	0.94	0.933	7.3937e-05	8.29687e-05	Congruent	UU
ENSMUSG00000021996	Esd	4.52137e-06	6.25737e-06	0.073084	0.00963599	0.117	0.0705	0.112293	0.155408	0.0240825	0.0260005	0.0329711	0.00792526	0.1	0.08	1	0	Congruent	UU
ENSMUSG00000022000	Zc3h13	0.0325495	0.0133163	0.0334728	0.00197893	0.297	0.261	1	0	0.234851	0.226982	0.0125411	0.0123323	0.322	0.3	1	0	Congruent	UU
ENSMUSG00000022010	Tsc22d1	0.00372981	0.000937984	0.09707	0.000527886	0.684	0.7105	1	0	0.576798	0.254785	0.0297966	0.0133796	0.697	0.716	1	0	Congruent	UU
ENSMUSG00000022012	Enox1	0.0465793	0.00583126	-0.0768616	0.00370838	0.822	0.8765	1	0	0.453008	0.366466	-0.0558325	0.0175323	0.892	0.90975	1	0	Congruent	DD
ENSMUSG00000022016	Akap11	1.75121e-08	2.4528e-08	0.125825	0.0121401	0.388	0.293	0.000434931	0.000609178	0.0260824	0.0243948	0.0295078	0.00674496	0.398	0.36	1	0	Congruent	UU
ENSMUSG00000022023	Wbp4	0.612871	0.0638706	0.0151281	0.000477929	0.125	0.12	1	0	0.00221828	0.00248889	0.052347	0.0108665	0.146	0.1135	1	0	Congruent	UU
ENSMUSG00000022037	Clu	0.000486435	0.000453639	0.157461	0.0089994	0.152	0.113	1	0	2.42389e-06	3.72803e-06	0.189928	0.0247176	0.15	0.1035	0.069459	0.106831	Congruent	UU
ENSMUSG00000022043	Trim35	0.433915	0.0303944	-0.0720825	0.00290328	0.296	0.2965	1	0	0.232482	0.277515	-0.00635271	0.0232666	0.32	0.29275	1	0	Congruent	DD
ENSMUSG00000022044	Stmn4	0.00202836	0.00170784	-0.195442	0.00901787	0.164	0.1935	1	0	0.000154883	9.23573e-05	-0.128597	0.0012858	0.147	0.1845	1	0	Congruent	DD
ENSMUSG00000022048	Dpysl2	0.121719	0.00611085	-0.0558139	0.00697932	0.373	0.33	1	0	0.581889	0.326662	-0.0362093	0.0226039	0.377	0.35925	1	0	Congruent	DD
ENSMUSG00000022064	Pibf1	0.0805346	0.0249007	0.0157912	0.000774299	0.302	0.2695	1	0	0.485634	0.327575	0.00528274	0.015947	0.338	0.32125	1	0	Congruent	UU
ENSMUSG00000022075	Rhobtb2	3.37521e-08	3.2013e-08	0.135353	0.00565899	0.28	0.2045	0.000838267	0.000795074	8.21378e-05	0.000145694	0.0871108	0.00268443	0.301	0.24725	0.450163	0.380969	Congruent	UU
ENSMUSG00000022092	Ppp3cc	0.492536	0.222547	-0.0193041	0.00618701	0.11	0.1165	1	0	0.117598	0.060805	-0.0364653	0.00548658	0.106	0.12025	1	0	Congruent	DD
ENSMUSG00000022095	Fhip2b	0.000239292	0.000258703	0.0575071	0.0054646	0.129	0.0905	1	0	0.00135385	0.0021637	0.0382737	0.00375324	0.103	0.07375	1	0	Congruent	UU
ENSMUSG00000022099	Dmtn	3.19404e-14	1.68193e-14	0.171892	0.00227659	0.273	0.1715	7.93273e-10	4.17724e-10	4.30186e-05	4.93723e-05	0.0807814	0.0100526	0.245	0.1935	0.526911	0.546873	Congruent	UU
ENSMUSG00000022100	Xpo7	0.0147902	0.00897906	0.0206548	0.00496605	0.322	0.2785	1	0	0.307781	0.43294	0.00663937	0.0215477	0.348	0.324	1	0	Congruent	UU
ENSMUSG00000022105	Rb1	0.000669871	0.000529722	-0.151425	0.0043877	0.23	0.271	1	0	0.00436762	0.00721967	-0.117793	0.0224738	0.257	0.2905	1	0	Congruent	DD
ENSMUSG00000022110	Sucla2	0.216479	0.0474309	0.0115501	0.00327944	0.152	0.136	1	0	0.0712011	0.0451578	0.0183234	0.00840816	0.17	0.149	1	0	Congruent	UU
ENSMUSG00000022111	Uchl3	0.00189797	0.000859529	0.0582107	0.00632227	0.199	0.1585	1	0	0.430862	0.181459	0.00704739	0.00633406	0.183	0.1735	1	0	Congruent	UU
ENSMUSG00000022114	Spry2	0.00026623	8.17651e-05	0.0617388	0.00238518	0.162	0.1195	1	0	2.95939e-06	4.82715e-06	0.0795734	0.00555484	0.17	0.1205	0.0848044	0.138327	Congruent	UU
ENSMUSG00000022119	Rbm26	4.88334e-05	1.92772e-05	-0.105695	0.00221743	0.626	0.7055	0.937143	0.0888927	0.44555	0.29473	-0.0169176	0.0104585	0.702	0.72175	1	0	Congruent	DD
ENSMUSG00000022131	Gpr180	0.000280732	0.000289912	0.056979	0.00573382	0.154	0.1115	1	0	8.18839e-13	1.14288e-12	0.116866	0.00521236	0.158	0.08825	2.34646e-08	3.27505e-08	Congruent	UU
ENSMUSG00000022139	Mbnl2	2.49056e-07	3.02741e-08	-0.162418	0.00157039	0.747	0.823	0.00618556	0.000751887	0.0016588	0.0020501	-0.113511	0.0223112	0.841	0.8635	0.824773	0.350453	Congruent	DD
ENSMUSG00000022141	Nipbl	6.5182e-06	7.14182e-06	-0.148189	0.0124644	0.656	0.731	0.161886	0.177374	0.175282	0.170296	-0.0271389	0.0153857	0.744	0.77475	1	0	Congruent	DD
ENSMUSG00000022174	Dad1	1.11351e-05	2.68348e-06	0.0672024	0.00181843	0.192	0.1345	0.276552	0.066647	0.00095033	0.00154849	0.0705988	0.00939323	0.15	0.11375	0.783132	0.433736	Congruent	UU
ENSMUSG00000022180	Slc7a8	0.643784	0.381158	-0.00523664	0.011134	0.141	0.134	1	0	0.379746	0.316625	-0.0028052	0.0154723	0.165	0.154	1	0	Congruent	DD
ENSMUSG00000022191	Drosha	0.0282119	0.0105695	0.0205301	0.00365478	0.181	0.1525	1	0	0.172369	0.107424	0.00628867	0.0110558	0.204	0.18575	1	0	Congruent	UU
ENSMUSG00000022197	Pdzd2	8.2822e-13	1.00725e-12	0.206889	0.00898807	0.495	0.376	2.05697e-08	2.5016e-08	0.000500519	0.000673394	0.146973	0.0266832	0.676	0.65325	0.579651	0.488435	Congruent	UU
ENSMUSG00000022199	Slc22a17	2.04803e-20	1.67745e-20	0.247169	0.0054295	0.608	0.4745	5.08649e-16	4.16612e-16	4.45853e-20	8.52392e-20	0.236231	0.0235145	0.527	0.38975	1.27764e-15	2.44261e-15	Congruent	UU
ENSMUSG00000022205	Sub1	6.05341e-05	0	0.0603897	0	0.144	0.101	1	0	0.473548	0.373913	0.0112539	0.00840064	0.111	0.103	1	0	Congruent	UU
ENSMUSG00000022208	Jph4	9.31326e-12	4.94717e-12	0.152295	0.00287537	0.331	0.2285	2.31304e-07	1.22868e-07	1.18172e-13	2.01574e-13	0.170057	0.0088494	0.343	0.2435	3.38635e-09	5.77631e-09	Congruent	UU
ENSMUSG00000022211	Carmil3	0.049619	0.0257551	0.0350652	0.00295265	0.116	0.096	1	0	9.7196e-05	0.000116577	0.0603575	0.00529629	0.119	0.08375	0.726425	0.316627	Congruent	UU
ENSMUSG00000022214	Dcaf11	0.0021226	0.000798302	0.0406812	0.000498724	0.113	0.082	1	0	0.0288897	0.0296467	0.0303536	0.00743166	0.1	0.07975	1	0	Congruent	UU
ENSMUSG00000022228	Zscan26	0.322214	0.149299	0.00793694	0.00854054	0.179	0.1655	1	0	0.327107	0.406263	0.0176815	0.0177776	0.199	0.184	1	0	Congruent	UU
ENSMUSG00000022234	Cct5	0.000480801	6.13731e-05	0.0438011	0.000503151	0.108	0.0745	1	0	0.000456752	0.000680869	0.0394879	0.00869782	0.101	0.06925	0.765365	0.46927	Congruent	UU
ENSMUSG00000022237	Ankrd33b	0.000108366	0.000113821	0.0919629	0.00858975	0.216	0.1655	0.846238	0.217452	4.40481e-05	8.68648e-05	0.0974959	0.0206185	0.252	0.19275	0.263277	0.491739	Congruent	UU
ENSMUSG00000022240	Ctnnd2	1.39776e-13	1.78218e-13	0.157284	0.0064752	0.975	0.9835	3.47147e-09	4.42622e-09	0.059157	0.0355842	0.0129006	0.00460941	0.985	0.99025	1	0	Congruent	UU
ENSMUSG00000022261	Sdc2	2.13234e-06	7.46905e-07	0.0964561	0	0.171	0.1165	0.0529588	0.0185501	8.0169e-06	5.0771e-06	0.0917977	0.00682721	0.189	0.142	0.229732	0.145489	Congruent	UU
ENSMUSG00000022263	Trio	0.224125	0.100355	-0.0194015	0.00818116	0.731	0.8025	1	0	0.763353	0.178761	-0.00311364	0.00948725	0.784	0.816	1	0	Congruent	DD
ENSMUSG00000022265	Ank	0.132011	0.0839241	-0.0953534	0.00826902	0.276	0.292	1	0	0.0752803	0.0681078	-0.10321	0.0103504	0.315	0.33225	1	0	Congruent	DD
ENSMUSG00000022270	Retreg1	0.000174459	0.000116419	-0.152543	0.00941312	0.178	0.221	1	0	0.0144966	0.0246088	-0.108642	0.0210419	0.199	0.22825	1	0	Congruent	DD
ENSMUSG00000022280	Rnf19a	0.17842	0.00340405	0.0112433	0.00187785	0.149	0.133	1	0	0.0642642	0.0782712	0.031014	0.0125295	0.172	0.14925	1	0	Congruent	UU
ENSMUSG00000022283	Pabpc1	7.49614e-08	8.92679e-08	0.108279	0.00803967	0.247	0.1725	0.00186174	0.00221706	6.33097e-08	7.45008e-08	0.105792	0.0137235	0.249	0.18075	0.0018142	0.00213489	Congruent	UU
ENSMUSG00000022285	Ywhaz	7.35036e-07	3.66642e-07	0.115623	0.00339732	0.376	0.299	0.0182554	0.00910593	4.03334e-07	6.35583e-07	0.121631	0.0162131	0.412	0.33525	0.0115579	0.0182133	Congruent	UU
ENSMUSG00000022295	Atp6v1c1	0.035429	0.000720078	0.0211028	0.00290914	0.129	0.106	1	0	0.053541	0.0672692	0.0262698	0.0060664	0.13	0.10975	1	0	Congruent	UU
ENSMUSG00000022300	Dcaf13	0.18315	0.125975	0.0176933	0.00677514	0.129	0.113	1	0	0.323696	0.143991	0.00692333	0.00621645	0.152	0.14075	1	0	Congruent	UU
ENSMUSG00000022306	Zfpm2	0.0189382	0.0121283	-0.12059	0.000801996	0.1	0.124	1	0	0.611656	0.310748	-0.0131032	0.0261151	0.122	0.12725	1	0	Congruent	DD
ENSMUSG00000022307	Oxr1	8.54044e-20	6.66324e-20	-0.358822	0.000205239	0.468	0.6245	2.1211e-15	1.65488e-15	1.04669e-12	1.2998e-12	-0.309832	0.0197093	0.578	0.675	2.99939e-08	3.72471e-08	Congruent	DD
ENSMUSG00000022311	Csmd3	5.82934e-10	6.24183e-10	0.128537	0.00519601	0.996	0.982	1.44777e-05	1.55022e-05	0.118257	0.151228	0.0377208	0.0165211	0.992	0.99025	1	0	Congruent	UU
ENSMUSG00000022321	Cdh10	5.89493e-23	8.6284e-24	-0.368102	0.00100102	0.503	0.6575	1.46407e-18	2.14295e-19	0.00100803	0.00184901	-0.179451	0.0218221	0.668	0.717	0.756605	0.362471	Congruent	DD
ENSMUSG00000022329	Stk3	0.112145	0.022162	-0.0630149	0.00177957	0.123	0.139	1	0	0.0363937	0.0537117	-0.0762724	0.0205827	0.119	0.142	1	0	Congruent	DD
ENSMUSG00000022332	Khdrbs3	0.495363	0.0232338	-0.0457241	0.00258046	0.154	0.1595	1	0	5.08637e-07	1.00763e-06	-0.126069	0.0114978	0.316	0.3955	0.0145755	0.0288746	Congruent	DD
ENSMUSG00000022335	Zfat	0.0152303	0.00641263	0.0408915	0.0033932	0.141	0.114	1	0	0.210319	0.208748	0.00984169	0.0148487	0.155	0.13875	1	0	Congruent	UU
ENSMUSG00000022336	Eif3e	0.363614	0.154359	0.0229996	0.00617548	0.14	0.1295	1	0	0.221282	0.223822	0.0131593	0.0127213	0.147	0.132	1	0	Congruent	UU
ENSMUSG00000022337	Emc2	0.128461	0.00155785	0.00428749	0.000867466	0.213	0.1905	1	0	0.33081	0.182202	0.00221106	0.0125352	0.24	0.22375	1	0	Congruent	UU
ENSMUSG00000022338	Eny2	0.130683	0.0821934	0.0218399	0.00565698	0.151	0.133	1	0	0.783749	0.120125	0.00425731	0.00273217	0.157	0.15625	1	0	Congruent	UU
ENSMUSG00000022353	Mtss1	9.52123e-07	1.14594e-07	-0.154518	0.000415282	0.12	0.173	0.0236469	0.00284605	0.00421699	0.00650796	-0.0741904	0.0193895	0.118	0.1535	0.706691	0.402683	Congruent	DD
ENSMUSG00000022354	Ndufb9	0.000117966	5.20207e-05	0.0655358	0.00144393	0.149	0.106	1	0	0.000803388	0.000690835	0.0542057	0.00515963	0.145	0.112	1	0	Congruent	UU
ENSMUSG00000022377	Asap1	0.806985	0.151902	-0.0548205	0.00975595	0.368	0.3605	1	0	2.84907e-11	3.0432e-11	-0.160401	0.00790851	0.546	0.6405	8.1643e-07	8.72059e-07	Congruent	DD
ENSMUSG00000022378	Cyrib	0.0012026	0.0011664	-0.12	0.0112407	0.634	0.701	1	0	3.39043e-09	3.87257e-09	-0.140818	0.0111064	0.676	0.75575	9.71561e-05	0.000110972	Congruent	DD
ENSMUSG00000022387	Brd1	0.280876	0.0556081	-0.0597898	0.00552232	0.192	0.2025	1	0	0.527246	0.305043	-0.00184179	0.00816638	0.219	0.208	1	0	Congruent	DD
ENSMUSG00000022389	Tef	0.173254	0.0304621	0.00838411	0.0022019	0.206	0.186	1	0	0.0571335	0.0407533	0.0434578	0.0136963	0.279	0.249	1	0	Congruent	UU
ENSMUSG00000022390	Zc3h7b	2.30067e-05	2.4392e-05	0.0741422	0.00576352	0.166	0.1165	0.571393	0.6058	7.96335e-06	8.21128e-06	0.0679713	0.00849638	0.16	0.114	0.228198	0.235302	Congruent	UU
ENSMUSG00000022391	Rangap1	0.00112713	0.000649181	0.0357904	0.00447758	0.113	0.08	1	0	0.17286	0.172715	0.0114825	0.00948051	0.103	0.08975	1	0	Congruent	UU
ENSMUSG00000022400	Rbx1	0.0741062	0.0255408	0.0130452	0.00292583	0.119	0.1	1	0	0.0988673	0.0253301	0.0138233	0.00361409	0.108	0.093	1	0	Congruent	UU
ENSMUSG00000022401	Xpnpep3	0.193643	0.0302364	0.00907207	0.00197989	0.101	0.0875	1	0	0.0118615	0.0159065	0.0346263	0.0115393	0.115	0.09075	1	0	Congruent	UU
ENSMUSG00000022403	St13	0.00171961	0.000565637	0.0499339	0.000887078	0.218	0.1755	1	0	0.00614913	0.0110034	0.0380989	0.0142214	0.249	0.207	1	0	Congruent	UU
ENSMUSG00000022415	Syngr1	0.331831	0.109743	0.00234974	0.00521569	0.133	0.1205	1	0	2.31446e-05	3.35636e-05	0.0660637	0.0041176	0.145	0.10375	0.390069	0.426965	Congruent	UU
ENSMUSG00000022416	Cacna1i	7.57635e-11	9.6643e-11	0.130111	0.00388995	0.19	0.1135	1.88166e-06	2.40023e-06	1.19185e-05	1.89826e-05	0.0734272	0.010205	0.18	0.12925	0.305471	0.473178	Congruent	UU
ENSMUSG00000022425	Enpp2	8.28881e-38	1.17207e-37	-0.725976	0.0234053	0.14	0.315	2.05861e-33	2.91094e-33	6.13141e-26	1.22437e-25	-0.460121	0.026581	0.155	0.2915	1.75702e-21	3.50855e-21	Congruent	DD
ENSMUSG00000022437	Samm50	5.42156e-08	5.75795e-08	0.0802576	0.00250464	0.138	0.0815	0.0013465	0.00143004	0.00368782	0.00455282	0.0444455	0.00478283	0.117	0.0895	1	0	Congruent	UU
ENSMUSG00000022454	Nell2	8.96028e-05	1.81622e-05	0.14832	0.00608003	0.626	0.626	1	0	0.192679	0.288151	0.0559471	0.0182501	0.672	0.6835	1	0	Congruent	UU
ENSMUSG00000022462	Slc38a2	0.914232	0.0343569	-0.122618	0.00672353	0.343	0.325	1	0	0.73513	0.182533	-0.00881793	0.0196459	0.339	0.3315	1	0	Congruent	DD
ENSMUSG00000022463	Srebf2	0.00421873	0.00214786	0.0332472	0.00813888	0.222	0.179	1	0	0.0943303	0.0766216	0.0160112	0.0038456	0.208	0.18625	1	0	Congruent	UU
ENSMUSG00000022471	Xrcc6	0.704048	0.183613	-0.0668139	0.0100755	0.176	0.174	1	0	0.777856	0.217056	-0.0479845	0.00358971	0.176	0.1745	1	0	Congruent	DD
ENSMUSG00000022472	Desi1	0.00281146	3.28454e-05	-0.157372	0.000389738	0.175	0.207	1	0	0.331309	0.177251	-0.0402616	0.0108109	0.175	0.184	1	0	Congruent	DD
ENSMUSG00000022477	Aco2	0.0004985	0.000304135	0.0629018	0.00634286	0.266	0.2145	1	0	0.0473807	0.0538518	0.0289254	0.0104832	0.28	0.249	1	0	Congruent	UU
ENSMUSG00000022489	Pde1b	1.39717e-36	1.04521e-36	0.39929	0.00178627	0.5	0.31	3.47002e-32	2.59588e-32	5.04907e-14	9.90724e-14	0.224022	0.0178324	0.469	0.36175	1.44686e-09	2.83902e-09	Congruent	UU
ENSMUSG00000022490	Ppp1r1a	5.46312e-07	2.65086e-07	0.0946479	0.000967415	0.176	0.119	0.0135682	0.00658368	0.00057344	0.000536944	0.0584313	0.0120331	0.157	0.121	0.803692	0.392617	Congruent	UU
ENSMUSG00000022494	Shisa9	1.79291e-23	1.13487e-23	0.321421	0.00616949	0.839	0.8295	4.45286e-19	2.81857e-19	0.0132396	0.019822	0.0643763	0.0174943	0.835	0.84275	1	0	Congruent	UU
ENSMUSG00000022498	Txndc11	0.0681172	0.0489436	0.0241898	0.00480272	0.219	0.1925	1	0	0.00654442	0.00951565	0.0655305	0.0182856	0.24	0.2035	1	0	Congruent	UU
ENSMUSG00000022507	1810013L24Rik	0.00207644	1.77341e-05	0.0436271	0.00488637	0.208	0.166	1	0	0.289395	0.279598	0.0122474	0.0150973	0.228	0.211	1	0	Congruent	UU
ENSMUSG00000022514	Il1rap	1.55056e-17	1.9099e-17	-0.370131	0.00667196	0.133	0.2345	3.85097e-13	4.74344e-13	6.15215e-10	5.24593e-10	-0.232364	0.0243635	0.168	0.23725	1.76296e-05	1.50327e-05	Congruent	DD
ENSMUSG00000022515	Anks3	0.0500326	0.0379756	0.0068181	0.00702034	0.206	0.176	1	0	0.000337742	0.000370498	0.0600667	0.0071134	0.223	0.17825	0.801804	0.233226	Congruent	UU
ENSMUSG00000022517	Mgrn1	0.00167419	0.00134368	0.05591	0.00265777	0.216	0.174	1	0	0.00886955	0.00500596	0.0230525	0.00464148	0.204	0.1715	1	0	Congruent	UU
ENSMUSG00000022521	Crebbp	0.102756	0.0136903	-0.0416229	0.00174319	0.641	0.6965	1	0	0.0997988	0.081898	-0.0457329	0.0105964	0.729	0.754	1	0	Congruent	DD
ENSMUSG00000022533	Atp13a3	0.000444116	0.000249061	0.0488531	0.00120465	0.281	0.224	1	0	0.530095	0.346757	0.00280546	0.0165817	0.286	0.274	1	0	Congruent	UU
ENSMUSG00000022536	Glyr1	0.580829	0.168854	0.00224384	0.00407784	0.166	0.1585	1	0	0.0665946	0.0424308	0.0327999	0.00108613	0.192	0.171	1	0	Congruent	UU
ENSMUSG00000022537	Tmem44	0.00859697	0.0062577	0.0446827	0.00888371	0.121	0.0945	1	0	0.0545212	0.0721083	0.0323602	0.00922712	0.12	0.099	1	0	Congruent	UU
ENSMUSG00000022540	Rogdi	3.96209e-08	7.52541e-09	0.0933755	0.00100309	0.142	0.0855	0.000984025	0.000186901	6.59235e-07	1.13342e-06	0.0722405	0.00363842	0.127	0.07975	0.018891	0.0324794	Congruent	UU
ENSMUSG00000022548	Apod	3.21681e-42	4.53441e-42	-0.910316	0.0304792	0.113	0.2895	7.98926e-38	1.12617e-37	4.93399e-24	9.25955e-24	-0.416541	0.0269692	0.134	0.2595	1.41388e-19	2.65342e-19	Congruent	DD
ENSMUSG00000022551	Cyc1	0.00163039	0.000442891	0.0480983	0.00480293	0.145	0.11	1	0	1.27797e-05	4.79812e-06	0.0609798	0.00367323	0.142	0.10075	0.366216	0.137495	Congruent	UU
ENSMUSG00000022564	Grina	9.76973e-17	1.35025e-16	0.20543	0.00978168	0.368	0.2385	2.42641e-12	3.35348e-12	5.08116e-14	7.28795e-14	0.170206	0.0127091	0.332	0.2345	1.45606e-09	2.08844e-09	Congruent	UU
ENSMUSG00000022565	Plec	2.29619e-07	4.69754e-08	0.105919	0.00140871	0.212	0.148	0.00570282	0.00116668	0.000884263	0.00146055	0.0510456	0.00776629	0.191	0.1495	0.832889	0.334222	Congruent	UU
ENSMUSG00000022577	Ly6h	2.10006e-15	8.53692e-17	0.210008	0.0012249	0.331	0.216	5.21572e-11	2.12023e-12	3.28762e-15	4.90279e-15	0.19602	0.00693001	0.337	0.235	9.421e-11	1.40494e-10	Congruent	UU
ENSMUSG00000022601	Zbtb11	0.000593449	0.000248866	0.0624541	0.00550855	0.254	0.2045	1	0	8.47855e-05	7.72357e-05	0.0726829	0.0106485	0.274	0.221	0.75523	0.489541	Congruent	UU
ENSMUSG00000022604	Cep97	0.0323039	0.00400026	-0.0735039	0.00321015	0.105	0.124	1	0	0.0333548	0.041179	-0.0558364	0.00948961	0.106	0.126	1	0	Congruent	DD
ENSMUSG00000022607	Ptk2	3.243e-11	3.81522e-11	-0.198831	0.0110874	0.615	0.733	8.05432e-07	9.47549e-07	0.00104377	0.00187989	-0.103859	0.0163308	0.749	0.80125	0.814584	0.370831	Congruent	DD
ENSMUSG00000022623	Shank3	3.0697e-08	1.569e-08	0.124093	0.00407242	0.247	0.1745	0.00076239	0.000389677	2.76506e-06	2.93299e-06	0.0849097	0.00968847	0.23	0.1725	0.0792356	0.0840477	Congruent	UU
ENSMUSG00000022629	Kif21a	3.37754e-08	2.13973e-08	-0.190001	0.0088425	0.601	0.685	0.000838846	0.000531424	0.00688079	0.00966315	-0.0982696	0.0273047	0.68	0.72125	1	0	Congruent	DD
ENSMUSG00000022635	Zcrb1	0.0455207	0.0159973	0.021192	0.00194776	0.123	0.101	1	0	0.419277	0.264742	0.00418601	0.0107215	0.134	0.1245	1	0	Congruent	UU
ENSMUSG00000022636	Alcam	4.41192e-26	4.75057e-26	0.346216	0.00592262	0.914	0.9175	1.09574e-21	1.17985e-21	3.90384e-09	5.09681e-09	0.151828	0.0260092	0.923	0.91525	0.000111869	0.000146054	Congruent	UU
ENSMUSG00000022637	Cblb	0.30392	0.165457	-0.0416811	0.00675741	0.135	0.145	1	0	0.0894179	0.063769	-0.0508968	0.00710687	0.164	0.18175	1	0	Congruent	DD
ENSMUSG00000022674	Ube2v2	0.315114	0.0592621	0.00782604	0.00241225	0.128	0.116	1	0	0.777143	0.227818	0.00670128	0.00788832	0.135	0.13325	1	0	Congruent	UU
ENSMUSG00000022680	Pdxdc1	0.314614	0.159868	-0.0257752	0.00669239	0.148	0.159	1	0	0.705431	0.132937	-0.0146778	0.0058093	0.168	0.16125	1	0	Congruent	DD
ENSMUSG00000022682	Rrn3	0.000976327	0.000237505	0.0608824	0.000977145	0.142	0.1065	1	0	0.0365034	0.0397723	0.0296844	0.00838631	0.134	0.11025	1	0	Congruent	UU
ENSMUSG00000022684	Bfar	0.442073	0.224411	0.00450103	0.0053885	0.106	0.097	1	0	0.0277128	0.0219466	0.0325592	0.00472206	0.116	0.09575	1	0	Congruent	UU
ENSMUSG00000022707	Gbe1	0.34997	0.0148522	-0.0234893	0.00376609	0.112	0.1205	1	0	0.11189	0.111027	-0.0328353	0.0163258	0.097	0.1135	1	0	Congruent	DD
ENSMUSG00000022710	Usp7	0.000605127	0.000201544	0.0640038	0.00165272	0.285	0.233	1	0	0.000489795	0.000498218	0.0619737	0.00759242	0.293	0.24575	1	0	Congruent	UU
ENSMUSG00000022718	Dgcr8	0.00805169	0.00685312	0.0268386	0.00507648	0.176	0.141	1	0	0.0456958	0.0651674	0.0245937	0.0155555	0.182	0.1555	1	0	Congruent	UU
ENSMUSG00000022748	Cmss1	1.30081e-34	1.81898e-34	0.389387	0.00959386	0.893	0.8725	3.2307e-30	4.51762e-30	2.08895e-05	4.03572e-05	0.142253	0.0225575	0.869	0.87375	0.265374	0.490354	Congruent	UU
ENSMUSG00000022750	Klhl22	0.00440308	0.00565578	0.0555116	0.00975751	0.138	0.1055	1	0	1.63815e-05	1.80125e-05	0.0734643	0.00877672	0.159	0.11425	0.467049	0.512858	Congruent	UU
ENSMUSG00000022752	Tomm70a	1.14891e-16	7.76794e-17	0.217603	0.000802312	0.364	0.2425	2.85344e-12	1.92925e-12	2.72081e-08	5.35011e-08	0.145607	0.0143401	0.393	0.309	0.000779675	0.00153313	Congruent	UU
ENSMUSG00000022761	Lztr1	0.000636667	0.000210489	0.0455654	0.00246113	0.129	0.0925	1	0	0.0080951	0.00681051	0.0382596	0.00407573	0.125	0.0995	1	0	Congruent	UU
ENSMUSG00000022762	Ncam2	0.1001	0.0748246	-0.0930271	0.0157835	0.873	0.8755	1	0	0.0172527	0.0291092	-0.0971302	0.00972622	0.907	0.91225	1	0	Congruent	DD
ENSMUSG00000022770	Dlg1	2.76949e-08	1.78087e-08	-0.233762	0.000662751	0.764	0.8215	0.000687831	0.000442297	7.2891e-07	1.29882e-06	-0.185754	0.0128333	0.823	0.862	0.0208877	0.0372189	Congruent	DD
ENSMUSG00000022771	Ppil2	0.192387	0.163938	0.0213217	0.00607367	0.156	0.1395	1	0	0.00786589	0.00589782	0.0407697	0.00750463	0.17	0.14075	1	0	Congruent	UU
ENSMUSG00000022772	Senp5	0.0477999	0.0138966	0.0215699	0.00122933	0.273	0.2405	1	0	0.080502	0.05143	0.0334787	0.00623104	0.276	0.25025	1	0	Congruent	UU
ENSMUSG00000022781	Pak2	0.088332	0.00317485	-0.0947745	0.000821038	0.178	0.195	1	0	0.683017	0.230808	-0.0239213	0.010742	0.217	0.21	1	0	Congruent	DD
ENSMUSG00000022789	Dnm1l	0.0297935	0.00125588	0.0274087	0.00255995	0.352	0.309	1	0	0.00478004	0.00423183	0.0598335	0.0137737	0.411	0.36525	1	0	Congruent	UU
ENSMUSG00000022791	Tnk2	0.000126875	3.26729e-05	0.0755445	0.000455115	0.209	0.16	1	0	0.000101105	0.000145562	0.0617862	0.00349437	0.183	0.13925	0.692832	0.361254	Congruent	UU
ENSMUSG00000022797	Tfrc	0.105973	0.0754452	0.0297935	0.0063391	0.183	0.161	1	0	0.0443654	0.0506017	0.0417548	0.00718781	0.179	0.15525	1	0	Congruent	UU
ENSMUSG00000022800	Fyttd1	0.152734	0.0462937	0.00421163	0.00255567	0.221	0.2	1	0	3.95017e-07	4.81612e-07	0.094755	0.0166307	0.276	0.20425	0.0113196	0.0138011	Congruent	UU
ENSMUSG00000022801	Lrch3	0.828176	0.150568	-0.0435261	0.0140609	0.286	0.2755	1	0	0.47153	0.416875	-0.0657956	0.0142371	0.312	0.314	1	0	Congruent	DD
ENSMUSG00000022822	Abcc5	0.0445806	0.00120099	-0.0591701	0.000828147	0.548	0.589	1	0	0.510487	0.332833	-0.019073	0.0106832	0.577	0.58675	1	0	Congruent	DD
ENSMUSG00000022829	Stxbp5l	2.48887e-17	1.28013e-17	0.202198	0.00434287	0.906	0.919	6.18137e-13	3.17933e-13	5.334e-06	9.68628e-06	0.12327	0.0200934	0.944	0.946	0.152851	0.27757	Congruent	UU
ENSMUSG00000022838	Eaf2	0.878513	0.0197418	0.00440554	0.00143986	0.122	0.121	1	0	0.00234341	0.00154846	0.0531072	0.001512	0.144	0.1145	1	0	Congruent	UU
ENSMUSG00000022840	Adcy5	1.20824e-30	3.42907e-31	0.385894	0.000546454	0.831	0.793	3.00078e-26	8.51644e-27	2.37068e-11	2.92505e-11	0.212604	0.0108499	0.788	0.75975	6.79342e-07	8.38201e-07	Congruent	UU
ENSMUSG00000022841	Ap2m1	0.000326412	0.000415298	0.0522756	0.00693301	0.129	0.0895	0.906714	0.131927	7.58436e-08	5.55025e-08	0.0740025	0.00274296	0.13	0.08175	0.00217337	0.00159048	Congruent	UU
ENSMUSG00000022843	Clcn2	0.00854243	0.00698456	0.0402436	0.00581533	0.189	0.154	1	0	8.78406e-07	1.04372e-06	0.0880805	0.0114769	0.212	0.15225	0.0251716	0.0299089	Congruent	UU
ENSMUSG00000022858	Tra2b	0.007497	0.0073298	0.0449039	0.00776957	0.311	0.2675	1	0	0.0739403	0.0647126	0.0187481	0.0176213	0.336	0.30325	1	0	Congruent	UU
ENSMUSG00000022865	Cxadr	0.00594931	0.00506833	0.0651706	0.00615828	0.163	0.1315	1	0	0.107161	0.120344	0.0257914	0.0128596	0.162	0.144	1	0	Congruent	UU
ENSMUSG00000022867	Usp25	0.716491	0.29831	-0.0705132	0.0110908	0.184	0.181	1	0	0.854434	0.0851566	-0.0380404	0.0165054	0.197	0.194	1	0	Congruent	DD
ENSMUSG00000022883	Robo1	6.08845e-10	2.60135e-10	0.147413	0.000458558	0.973	0.9735	1.51213e-05	6.46071e-06	3.69118e-09	3.42347e-09	0.160098	0.0207632	0.979	0.98225	0.000105774	9.81028e-05	Congruent	UU
ENSMUSG00000022884	Eif4a2	1.13974e-14	4.96158e-15	0.175704	0.00254082	0.318	0.2055	2.83067e-10	1.23226e-10	2.61483e-06	5.10074e-06	0.112847	0.0101003	0.307	0.239	0.0749307	0.146167	Congruent	UU
ENSMUSG00000022885	St6gal1	2.72043e-15	5.21246e-16	-0.213348	0.00427553	0.061	0.138	6.75646e-11	1.29457e-11	6.08181e-08	9.95936e-08	-0.135341	0.0154608	0.078	0.128	0.0017428	0.00285395	Congruent	DD
ENSMUSG00000022890	Atp5j	1.57815e-10	2.6238e-11	0.125917	0.00093505	0.206	0.128	3.9195e-06	6.51647e-07	0.00258623	0.00353736	0.0605437	0.00645353	0.182	0.147	1	0	Congruent	UU
ENSMUSG00000022892	App	0.559314	0.185044	-0.11668	0.00624577	0.871	0.884	1	0	0.122187	0.105681	-0.0751364	0.017956	0.912	0.915	1	0	Congruent	DD
ENSMUSG00000022897	Dyrk1a	0.756764	0.269812	-0.0346643	0.0134674	0.365	0.3425	1	0	0.0727577	0.0854152	-0.0672267	0.00992808	0.414	0.43525	1	0	Congruent	DD
ENSMUSG00000022905	Kpna1	9.61332e-05	6.60014e-05	0.0628926	0.00343048	0.265	0.2075	1	0	0.19323	0.112643	0.000351947	0.00669451	0.257	0.23475	1	0	Congruent	UU
ENSMUSG00000022911	Arl13b	0.175618	0.0611389	0.0139622	0.00435441	0.12	0.1045	1	0	0.0737822	0.0423218	0.0173242	0.00591998	0.139	0.119	1	0	Congruent	UU
ENSMUSG00000022935	Grik1	4.0281e-06	2.92738e-06	-0.443527	0.0133126	0.116	0.165	0.100042	0.0727045	7.25664e-07	8.5401e-07	-0.327308	0.0843347	0.116	0.1695	0.0207946	0.0244725	Congruent	DD
ENSMUSG00000022946	Dop1b	0.0210936	0.00916923	0.0248966	0.00470604	0.23	0.1955	1	0	0.0433066	0.0314543	0.00965455	0.0125791	0.239	0.2095	1	0	Congruent	UU
ENSMUSG00000022948	Setd4	0.0737537	0.0290628	0.03666	0.00141916	0.154	0.133	1	0	0.0984537	0.124147	0.0367367	0.0109886	0.159	0.13925	1	0	Congruent	UU
ENSMUSG00000022951	Rcan1	0.136447	0.0200079	0.0193247	0.00144803	0.128	0.1125	1	0	0.0846702	0.0558471	0.0245933	0.00810619	0.124	0.10675	1	0	Congruent	UU
ENSMUSG00000022956	Atp5o.1	1.72045e-09	6.3137e-10	0.114613	0.000992354	0.15	0.0865	4.27292e-05	1.56807e-05	0.00196477	0.00201125	0.0423166	0.00471988	0.129	0.09975	1	0	Congruent	UU
ENSMUSG00000022957	Itsn1	0.0213781	0.0139913	0.0483352	0.00595762	0.293	0.257	1	0	0.064681	0.0375946	0.0262472	0.00729433	0.315	0.285	1	0	Congruent	UU
ENSMUSG00000022973	Synj1	0.000220221	0.00012976	0.0810544	0.000746262	0.364	0.301	1	0	0.192184	0.119393	0.0199097	0.0189041	0.401	0.37775	1	0	Congruent	UU
ENSMUSG00000022982	Sod1	2.18805e-05	3.72122e-06	0.0747997	0.00147384	0.145	0.0995	0.543424	0.0924203	2.92408e-06	5.61946e-06	0.0798608	0.00670656	0.145	0.09725	0.0837924	0.161031	Congruent	UU
ENSMUSG00000022992	Kansl2	0.113157	0.0618463	0.0167188	0.00285354	0.141	0.122	1	0	0.000312881	0.000322346	0.0543244	0.00679842	0.159	0.12125	1	0	Congruent	UU
ENSMUSG00000022995	Enah	0.666325	0.277217	-0.0380279	0.0188217	0.328	0.3145	1	0	0.387674	0.244472	-0.00773947	0.0208575	0.399	0.4155	1	0	Congruent	DD
ENSMUSG00000023007	Prpf40b	0.604263	0.00308759	0.0156581	0.000473712	0.134	0.128	1	0	0.0706751	0.112242	0.0316221	0.0103896	0.136	0.11475	1	0	Congruent	UU
ENSMUSG00000023011	Faim2	8.45334e-06	1.14202e-05	0.0827422	0.00828792	0.147	0.096	0.209947	0.283633	0.0156298	0.00809391	0.0263683	0.00490983	0.132	0.108	1	0	Congruent	UU
ENSMUSG00000023017	Asic1	0.0131053	0.00399884	0.0389481	0.000979491	0.13	0.104	1	0	4.31599e-05	5.01359e-05	0.0727995	0.00621714	0.143	0.102	0.571629	0.507962	Congruent	UU
ENSMUSG00000023018	Smarcd1	0.0223933	0.0130297	0.0236753	0.00375052	0.162	0.132	1	0	0.0360407	0.0594936	0.0378835	0.0118292	0.15	0.12325	1	0	Congruent	UU
ENSMUSG00000023026	Dip2b	1.25608e-16	1.46849e-16	-0.365174	0.0130232	0.431	0.536	3.11961e-12	3.64714e-12	2.52454e-08	4.90663e-08	-0.177717	0.00717632	0.542	0.61825	0.000723432	0.00140604	Congruent	DD
ENSMUSG00000023033	Scn8a	2.4148e-06	2.73146e-06	0.149386	0.00711433	0.746	0.756	0.059974	0.0678384	0.0730605	0.0568393	0.0416577	0.010405	0.774	0.7895	1	0	Congruent	UU
ENSMUSG00000023034	Nr4a1	1.55843e-15	1.28646e-15	0.223615	0.00241911	0.176	0.0895	3.87052e-11	3.19506e-11	0.269297	0.202466	0.0331045	0.00570241	0.113	0.10275	1	0	Congruent	UU
ENSMUSG00000023044	Csad	0.232506	0.122775	0.0061157	0.00481199	0.121	0.1075	1	0	0.0315101	0.0371905	0.0322325	0.0146866	0.119	0.0935	0.886476	0.227047	Congruent	UU
ENSMUSG00000023050	Map3k12	0.0034406	0.00297954	0.0481042	0.00510651	0.18	0.143	1	0	4.33315e-07	3.82425e-07	0.075997	0.00463296	0.189	0.1335	0.0124171	0.0109588	Congruent	UU
ENSMUSG00000023055	Calcoco1	0.00465377	0.000210475	0.0618142	0.0014029	0.178	0.144	1	0	1.24255e-05	2.41513e-05	0.0861825	0.00922936	0.18	0.129	0.257534	0.495033	Congruent	UU
ENSMUSG00000023066	Rttn	0.706167	0.0909878	-0.0103635	0.000471087	0.123	0.127	1	0	0.384721	0.417965	-0.0297708	0.0139877	0.119	0.128	1	0	Congruent	DD
ENSMUSG00000023072	Cep89	0.116125	0.0225128	0.0220267	0.00149471	0.102	0.087	1	0	0.0115349	0.00333213	0.0336799	0.00195515	0.103	0.082	1	0	Congruent	UU
ENSMUSG00000023079	Gtf2ird1	0.00016179	9.18685e-05	0.0881926	0.00167031	0.284	0.23	1	0	1.3578e-06	2.54105e-06	0.0993201	0.0129233	0.275	0.2075	0.0389092	0.0728163	Congruent	UU
ENSMUSG00000023087	Noct	0.00818616	0.00259806	0.038309	0.00453284	0.105	0.0795	1	0	0.00450455	0.00461304	0.0388617	0.00786146	0.122	0.0955	1	0	Congruent	UU
ENSMUSG00000023088	Abcc1	0.487943	0.128545	0.000678594	0.00287363	0.128	0.119	1	0	0.0104791	0.0147822	0.0417264	0.0114255	0.145	0.1155	0.914804	0.170392	Congruent	UU
ENSMUSG00000023089	Ndufa5	4.1299e-10	4.97e-10	0.114885	0.0039791	0.157	0.089	1.0257e-05	1.23435e-05	0.0185114	0.0206287	0.0402846	0.0101564	0.133	0.109	1	0	Congruent	UU
ENSMUSG00000023150	Ivns1abp	0.000112485	8.56048e-06	0.0112055	0.00280708	0.629	0.587	1	0	3.17849e-20	6.30892e-20	0.295004	0.0195823	0.589	0.47275	9.10829e-16	1.80788e-15	Congruent	UU
ENSMUSG00000023169	Slc38a1	4.03536e-07	5.43663e-07	0.107216	0.0114701	0.224	0.157	0.0100222	0.0135024	0.0134995	0.0136942	0.0568951	0.00858048	0.207	0.1785	1	0	Congruent	UU
ENSMUSG00000023170	Gps2	0.0411431	0.00114393	0.0444148	0.00187612	0.16	0.136	1	0	0.13198	0.136432	0.0198138	0.00964622	0.146	0.1275	1	0	Congruent	UU
ENSMUSG00000023175	Bsg	5.30996e-09	5.69956e-09	0.116434	0.00334609	0.284	0.1975	0.000131878	0.000141554	0.0168052	0.0143867	0.0286033	0.013601	0.205	0.17525	1	0	Congruent	UU
ENSMUSG00000023191	P3h3	4.3949e-05	5.08623e-05	0.0697998	0.00452837	0.123	0.0815	0.599145	0.566895	2.58213e-06	4.06766e-06	0.0645468	0.00344741	0.104	0.065	0.0739935	0.116563	Congruent	UU
ENSMUSG00000023236	Scg5	1.09222e-13	1.4356e-13	0.202628	0.011747	0.428	0.3115	2.71263e-09	3.56545e-09	3.13366e-05	6.24128e-05	0.114755	0.0286083	0.425	0.35125	0.252801	0.498152	Congruent	UU
ENSMUSG00000023353	Agap3	0.000319845	0.000189071	0.0685598	0.00431714	0.246	0.196	1	0	4.12821e-07	4.31762e-07	0.0978465	0.0133951	0.251	0.18525	0.0118298	0.0123726	Congruent	UU
ENSMUSG00000023456	Tpi1	1.19583e-06	0	0.0884791	0	0.159	0.106	0.0296997	0	0.0706377	0.112071	0.0332141	0.00948748	0.141	0.12025	1	0	Congruent	UU
ENSMUSG00000023460	Rab12	0.0826466	0.0308259	0.0151431	0.00239189	0.135	0.1145	1	0	0.102123	0.0671878	0.0152278	0.00940661	0.14	0.12175	1	0	Congruent	UU
ENSMUSG00000023473	Celsr3	0.000119981	0.000113914	0.0702241	0.00399077	0.131	0.092	0.989662	0.0146204	0.000115066	0.000191676	0.0621205	0.0113481	0.126	0.0875	0.507771	0.568438	Congruent	UU
ENSMUSG00000023571	C1qtnf12	6.79439e-06	5.02418e-07	0.0692753	0.00301074	0.124	0.079	0.168746	0.0124781	1.54905e-07	2.51289e-07	0.0692215	0.00322181	0.106	0.062	0.00443897	0.00720093	Congruent	UU
ENSMUSG00000023764	Sfi1	0.00053137	2.04812e-05	0.0592745	0.000961489	0.157	0.117	1	0	0.000780778	0.0013701	0.0526297	0.0070366	0.159	0.12125	0.996945	0.00610915	Congruent	UU
ENSMUSG00000023800	Tiam2	6.93221e-13	8.31194e-13	0.172099	0.00440839	0.354	0.2445	1.72168e-08	2.06435e-08	4.66336e-12	7.4133e-12	0.175401	0.0124535	0.37	0.27675	1.33633e-07	2.12435e-07	Congruent	UU
ENSMUSG00000023805	Synj2	1.73679e-06	1.48341e-06	-0.179919	0.0091846	0.067	0.1095	0.0431349	0.0368419	1.66315e-05	1.52129e-05	-0.109878	0.00706311	0.071	0.106	0.446896	0.377779	Congruent	DD
ENSMUSG00000023809	Rps6ka2	0.000407521	0.00013931	0.0812404	0.00177725	0.22	0.173	1	0	4.63523e-05	9.26433e-05	0.123828	0.0196387	0.304	0.24	0.250659	0.499561	Congruent	UU
ENSMUSG00000023826	Prkn	1.74026e-08	1.28834e-09	-0.175304	0.00218176	0.786	0.8935	0.000432212	3.19973e-05	6.94526e-07	6.43047e-07	-0.150886	0.00933368	0.872	0.909	0.0199023	0.0184271	Congruent	DD
ENSMUSG00000023827	Agpat4	8.69881e-07	8.53518e-07	-0.169997	0.00426302	0.088	0.1365	0.0216044	0.021198	0.0319253	0.0268192	-0.0828423	0.0116874	0.119	0.1385	1	0	Congruent	DD
ENSMUSG00000023845	Lnpep	0.681578	0.07045	-0.00642469	0.00302264	0.29	0.28	1	0	0.572056	0.209607	-0.0170405	0.0127223	0.353	0.33925	1	0	Congruent	DD
ENSMUSG00000023852	Chd1	0.375563	0.0694692	-0.00700628	0.00214902	0.211	0.1945	1	0	0.529838	0.343245	-0.00496712	0.0159653	0.214	0.2005	1	0	Congruent	DD
ENSMUSG00000023861	Mpc1	0.0368202	0.047088	0.0206096	0.0161757	0.213	0.1785	1	0	0.638316	0.25127	0.000381231	0.0108365	0.212	0.2045	1	0	Congruent	UU
ENSMUSG00000023868	Pde10a	2.40403e-41	2.10097e-41	0.514193	0.00189921	0.962	0.965	5.97066e-37	5.21796e-37	1.62437e-09	1.21363e-09	0.187574	0.0272289	0.98	0.9775	4.6548e-05	3.47779e-05	Congruent	UU
ENSMUSG00000023883	Phf10	0.0287751	0.00207877	0.0363006	0.000980903	0.121	0.0985	1	0	0.0184554	0.0323413	0.0291601	0.00567308	0.109	0.085	1	0	Congruent	UU
ENSMUSG00000023923	Tbc1d5	1.52044e-24	4.21572e-26	-0.479438	0.00147455	0.644	0.755	3.77616e-20	1.04702e-21	7.38235e-14	1.47606e-13	-0.348565	0.0265621	0.697	0.7675	2.11549e-09	4.22978e-09	Congruent	DD
ENSMUSG00000023944	Hsp90ab1	3.46883e-39	3.57919e-39	0.385742	0.00173052	0.521	0.312	8.61518e-35	8.88927e-35	7.35588e-07	9.20481e-07	0.125408	0.00793793	0.488	0.41325	0.021079	0.0263773	Congruent	UU
ENSMUSG00000023952	Gtpbp2	0.00157165	0.000430111	0.0469492	0.00134082	0.202	0.1595	1	0	2.63836e-05	4.71362e-05	0.0767441	0.0126497	0.207	0.1565	0.311098	0.463858	Congruent	UU
ENSMUSG00000023960	Enpp5	5.63584e-08	3.7315e-08	0.101427	0.00598054	0.221	0.151	0.00139972	0.000926755	3.4481e-05	2.34955e-05	0.0688798	0.00193601	0.206	0.15875	0.761209	0.329128	Congruent	UU
ENSMUSG00000023965	Fbxl17	0.122687	0.0121916	-0.0500949	0.000725304	0.835	0.9005	1	0	0.52824	0.449029	-0.033902	0.0170986	0.894	0.91675	1	0	Congruent	DD
ENSMUSG00000024002	Brd4	0.0890792	0.0218405	0.00632525	0.00413571	0.39	0.3495	1	0	0.0986032	0.0838459	0.0119187	0.0106607	0.405	0.36975	1	0	Congruent	UU
ENSMUSG00000024006	Stk38	0.785598	0.29692	-0.0196992	0.0142797	0.213	0.2135	1	0	0.689315	0.221053	-0.00818514	0.00253941	0.237	0.22975	1	0	Congruent	DD
ENSMUSG00000024008	Cpne5	7.95977e-17	9.1765e-17	0.20177	0.00355656	0.378	0.25	1.97689e-12	2.27908e-12	1.40594e-10	2.64796e-10	0.15721	0.0150498	0.376	0.2815	4.02887e-06	7.58798e-06	Congruent	UU
ENSMUSG00000024012	Mtch1	5.21204e-08	5.66987e-08	0.114155	0.00541908	0.238	0.1665	0.00129446	0.00140817	2.00668e-10	3.16915e-10	0.11871	0.00866916	0.23	0.1555	5.75035e-06	9.08152e-06	Congruent	UU
ENSMUSG00000024030	Abcg1	0.623623	0.000475088	-0.0420134	0.000929512	0.127	0.129	1	0	0.668157	0.227801	-0.0293387	0.00367469	0.127	0.12925	1	0	Congruent	DD
ENSMUSG00000024044	Epb41l3	0.403499	0.0888115	-0.0254906	0.00257286	0.471	0.4415	1	0	0.000523245	0.000463962	-0.0836331	0.0116185	0.561	0.611	1	0	Congruent	DD
ENSMUSG00000024052	Lpin2	0.109699	0.0583091	0.0137782	0.00466031	0.141	0.1215	1	0	0.190999	0.179638	0.0235797	0.0117015	0.161	0.14575	1	0	Congruent	UU
ENSMUSG00000024059	Clip4	2.61132e-06	2.03765e-07	0.114397	0.00283992	0.326	0.2585	0.0648547	0.0050607	2.18798e-07	4.18632e-07	0.12691	0.0156608	0.36	0.283	0.00626988	0.0119963	Congruent	UU
ENSMUSG00000024068	Spast	0.210526	0.0595882	-0.0378193	0.000926137	0.124	0.137	1	0	0.198125	0.114907	-0.0365269	0.0103103	0.138	0.15025	1	0	Congruent	DD
ENSMUSG00000024073	Birc6	0.000112845	5.5573e-05	-0.066381	0.00406791	0.706	0.806	1	0	0.128402	0.0785573	-0.0401694	0.0112646	0.78	0.81325	1	0	Congruent	DD
ENSMUSG00000024074	Crim1	1.81873e-05	1.64891e-05	0.0708929	0.00525723	0.143	0.0965	0.4517	0.409522	0.153234	0.242789	0.019108	0.0172616	0.155	0.13475	1	0	Congruent	UU
ENSMUSG00000024077	Strn	2.77416e-08	3.28806e-09	0.195105	0.000403616	0.752	0.7435	0.000688991	8.16623e-05	0.0270075	0.0170511	0.0822713	0.00572072	0.724	0.7285	1	0	Congruent	UU
ENSMUSG00000024081	Cebpz	0.279114	0.211997	0.000652223	0.0115673	0.185	0.1685	1	0	0.193833	0.133648	0.00507239	0.0118257	0.218	0.19775	1	0	Congruent	UU
ENSMUSG00000024082	Ndufaf7	0.00106019	0.000932098	0.0633468	0.00477411	0.233	0.187	1	0	1.18967e-06	1.82019e-06	0.11123	0.0202845	0.257	0.194	0.0340912	0.0521594	Congruent	UU
ENSMUSG00000024083	Pja2	0.0786281	0.0313229	0.0478152	0.00148817	0.554	0.5335	1	0	0.67484	0.338481	0.0309189	0.0119513	0.639	0.6545	1	0	Congruent	UU
ENSMUSG00000024091	Vapa	0.0390518	0.0208779	0.00642831	0.00435535	0.281	0.2445	1	0	0.020491	0.0347593	0.0436315	0.0106961	0.329	0.29025	1	0	Congruent	UU
ENSMUSG00000024095	Hnrnpll	3.53183e-05	1.92775e-05	0.0791023	0.00384717	0.262	0.203	0.76931	0.326245	0.0531635	0.0507468	0.0424139	0.00971198	0.258	0.23275	1	0	Congruent	UU
ENSMUSG00000024097	Srsf7	3.08293e-07	1.7796e-07	0.107506	0.00426594	0.353	0.27	0.00765676	0.0044198	4.20052e-05	4.30887e-05	0.0731654	0.0079414	0.387	0.324	0.590083	0.481693	Congruent	UU
ENSMUSG00000024099	Ndufv2	0.000477923	0.000592401	0.0712526	0.00987819	0.219	0.1715	1	0	0.0271086	0.0497399	0.0484144	0.0119267	0.23	0.19825	1	0	Congruent	UU
ENSMUSG00000024112	Cacna1h	2.01134e-07	2.0226e-08	0.100694	0.000945449	0.199	0.136	0.00499537	0.000502332	1.43708e-08	1.29845e-08	0.0901929	0.00348078	0.174	0.116	0.000411811	0.000372083	Congruent	UU
ENSMUSG00000024120	Lrpprc	0.131722	0.0383045	0.00971689	0.00567421	0.267	0.241	1	0	0.412079	0.361019	0.0100233	0.0114565	0.3	0.28525	1	0	Congruent	UU
ENSMUSG00000024121	Atp6v0c	1.60826e-18	2.05402e-18	0.240864	0.0064928	0.547	0.4025	3.99427e-14	5.10135e-14	7.34454e-11	9.92197e-11	0.162985	0.0202173	0.429	0.334	2.10465e-06	2.84324e-06	Congruent	UU
ENSMUSG00000024122	Pdpk1	1.49406e-05	1.40206e-06	0.0891752	0.00247007	0.296	0.233	0.371064	0.0348216	0.00219114	0.00251291	0.0591658	0.011169	0.32	0.273	1	0	Congruent	UU
ENSMUSG00000024130	Abca3	0.00134278	0.00125308	0.0466964	0.00652444	0.175	0.1335	1	0	0.000740975	0.00112891	0.0560872	0.00612662	0.18	0.14225	1	0	Congruent	UU
ENSMUSG00000024135	Srbd1	0.614976	0.0218769	-0.00290022	0.00410153	0.154	0.1475	1	0	0.463181	0.273496	-0.0237914	0.0122477	0.156	0.16075	1	0	Congruent	DD
ENSMUSG00000024163	Mapk8ip3	9.63422e-09	1.2637e-08	0.129515	0.008996	0.247	0.169	0.000239275	0.000313853	0.0532534	0.0969991	0.0298213	0.0198108	0.249	0.21575	1	0	Congruent	UU
ENSMUSG00000024186	Rgs11	4.11645e-07	4.83895e-07	0.12068	0.00601036	0.221	0.1565	0.0102236	0.012018	9.3247e-08	1.18165e-07	0.106671	0.0103572	0.212	0.1495	0.00267208	0.00338614	Congruent	UU
ENSMUSG00000024188	Luc7l	0.287185	0.0930343	-0.0378294	0.00392781	0.178	0.19	1	0	0.778419	0.164279	-0.0144581	0.00390384	0.205	0.207	1	0	Congruent	DD
ENSMUSG00000024201	Kdm4b	0.00335854	0.000537647	0.0429046	0.00175962	0.225	0.1845	1	0	0.00996518	0.0103363	0.036731	0.00579273	0.202	0.1705	1	0	Congruent	UU
ENSMUSG00000024211	Grm8	0.000430091	0.000228168	0.0897149	0.00360879	0.266	0.216	1	0	0.00891543	0.00960533	0.029091	0.0257118	0.445	0.5055	1	0	Congruent	UU
ENSMUSG00000024219	Anks1	0.0400327	0.0120584	0.0052851	0.00581751	0.244	0.2115	1	0	0.00770837	0.00925984	0.0573522	0.0122125	0.247	0.20825	1	0	Congruent	UU
ENSMUSG00000024220	Zfp523	0.0021636	0.00170905	0.0570567	0.00336918	0.154	0.1185	1	0	1.93164e-05	2.14933e-05	0.0733615	0.00482772	0.146	0.10375	0.458972	0.455143	Congruent	UU
ENSMUSG00000024231	Cul2	0.0149541	0.012691	0.0147429	0.0060515	0.165	0.133	1	0	0.165818	0.069035	0.0201017	0.00705054	0.188	0.1715	1	0	Congruent	UU
ENSMUSG00000024234	Mtpap	0.798676	0.0631354	-0.0171672	0.00331291	0.125	0.1265	1	0	0.435827	0.13248	-0.00574348	0.0126108	0.142	0.13625	1	0	Congruent	DD
ENSMUSG00000024240	Epc1	0.929103	0.0581825	-0.0533809	0.006029	0.328	0.314	1	0	0.655465	0.275441	-0.0248754	0.00783631	0.411	0.38925	1	0	Congruent	DD
ENSMUSG00000024242	Map4k3	0.648636	0.139909	-0.0604728	0.00251266	0.191	0.19	1	0	0.390851	0.189561	-0.0417686	0.0165275	0.212	0.2195	1	0	Congruent	DD
ENSMUSG00000024260	Sap130	0.0696337	0.0179199	0.00987162	0.00496859	0.176	0.1505	1	0	0.367142	0.132215	0.00728534	0.0036747	0.192	0.17925	1	0	Congruent	UU
ENSMUSG00000024261	Syt4	3.18685e-25	7.72944e-26	0.251603	0.00225745	0.306	0.165	7.91485e-21	1.91968e-21	9.48887e-09	1.53768e-08	0.125647	0.0119478	0.27	0.19625	0.000271913	0.000440637	Congruent	UU
ENSMUSG00000024268	Celf4	0.392545	0.129479	0.0383063	0.00376734	0.612	0.6415	1	0	2.67714e-06	3.52774e-06	0.123148	0.0112931	0.755	0.72925	0.0767161	0.101091	Congruent	UU
ENSMUSG00000024271	Elp2	0.329992	0.0336577	0.0112672	0.000484742	0.122	0.111	1	0	0.143114	0.115735	0.0250349	0.00990154	0.131	0.11625	1	0	Congruent	UU
ENSMUSG00000024273	2700062C07Rik	0.537407	0.121719	0.008561	0.00242833	0.11	0.1035	1	0	0.029306	0.0482767	0.0412073	0.0103958	0.123	0.1	1	0	Congruent	UU
ENSMUSG00000024283	Wac	0.263982	0.119973	-0.0985579	0.00922931	0.397	0.397	1	0	0.503507	0.329911	-0.0180063	0.0166262	0.523	0.53075	1	0	Congruent	DD
ENSMUSG00000024286	Ccny	0.035239	0.0101641	0.0261635	0.00110905	0.341	0.302	1	0	0.276368	0.352292	0.00706205	0.0270539	0.385	0.3605	1	0	Congruent	UU
ENSMUSG00000024287	Thoc1	2.93776e-05	7.41726e-06	0.0917698	0.00370153	0.365	0.296	0.729622	0.184215	9.58595e-06	6.90683e-06	0.0967797	0.00884787	0.367	0.30375	0.274695	0.197922	Congruent	UU
ENSMUSG00000024290	Rock1	0.937725	0.0618182	-0.0472776	0.000297634	0.494	0.481	1	0	0.0536618	0.0391387	-0.0444346	0.00745854	0.583	0.61525	1	0	Congruent	DD
ENSMUSG00000024293	Esco1	0.213291	0.0204803	0.0167813	0.00130203	0.214	0.1955	1	0	0.383644	0.383753	0.0103976	0.0173585	0.241	0.227	1	0	Congruent	UU
ENSMUSG00000024294	Mib1	0.00124499	0.000748692	0.0685932	0.00370691	0.36	0.305	1	0	0.133329	0.135702	0.0274675	0.00850365	0.388	0.36125	1	0	Congruent	UU
ENSMUSG00000024298	Zfp871	0.083917	0.0287506	0.0185204	0.00454406	0.173	0.1505	1	0	0.0104275	0.0107415	0.0347787	0.0183853	0.203	0.16875	1	0	Congruent	UU
ENSMUSG00000024302	Dtna	1.44327e-07	2.43342e-08	-0.160075	0.000467847	0.568	0.661	0.0035845	0.000604365	7.75041e-05	0.000137709	-0.107209	0.0300771	0.654	0.7065	0.437501	0.41769	Congruent	DD
ENSMUSG00000024304	Cdh2	5.03151e-10	9.47962e-11	-0.173658	0.00879949	0.527	0.6495	1.24963e-05	2.35436e-06	0.0210349	0.0373976	-0.0348673	0.0279202	0.61	0.67125	1	0	Congruent	DD
ENSMUSG00000024317	Rnf138	0.0698408	0.0339715	0.0179506	0.00139332	0.164	0.14	1	0	0.0801998	0.0606077	0.0250007	0.00707926	0.174	0.154	1	0	Congruent	UU
ENSMUSG00000024325	Ring1	1.49217e-05	1.44265e-05	0.0812598	0.00679341	0.202	0.145	0.370595	0.358297	6.54343e-12	1.30856e-11	0.135134	0.00909829	0.213	0.12875	1.87508e-07	3.74982e-07	Congruent	UU
ENSMUSG00000024335	Brd2	3.61281e-05	2.88859e-05	0.0751851	0.00541189	0.211	0.1565	0.694996	0.43134	1.55083e-09	3.01755e-09	0.11242	0.00958965	0.192	0.122	4.44405e-05	8.6471e-05	Congruent	UU
ENSMUSG00000024346	Pfdn1	0.126411	0.0569028	-0.0411193	0.00419523	0.127	0.1425	1	0	0.733527	0.265577	-0.00150168	0.00596609	0.156	0.15125	1	0	Congruent	DD
ENSMUSG00000024357	Sil1	0.035069	0.00692542	0.0423244	0	0.253	0.222	1	0	0.109959	0.101662	0.0116529	0.0101977	0.229	0.205	1	0	Congruent	UU
ENSMUSG00000024359	Hspa9	0.00233511	0.00263394	0.0569101	0.00802912	0.214	0.173	1	0	0.0067723	0.00694275	0.0456472	0.00999543	0.209	0.1755	1	0	Congruent	UU
ENSMUSG00000024360	Etf1	0.0422475	0.0108658	0.0294614	0.00145147	0.133	0.11	1	0	0.475093	0.415129	0.00776624	0.0112126	0.125	0.11625	1	0	Congruent	UU
ENSMUSG00000024370	Cdc23	0.874941	0.142409	0.00305169	0.00335809	0.12	0.1175	1	0	0.500484	0.32346	0.0064094	0.00818679	0.128	0.12	1	0	Congruent	UU
ENSMUSG00000024381	Bin1	7.25386e-10	1.0025e-09	-0.270749	0.0154804	0.16	0.2365	1.80157e-05	2.4898e-05	1.21286e-06	1.15685e-06	-0.231734	0.024749	0.193	0.24475	0.0347557	0.0331507	Congruent	DD
ENSMUSG00000024383	Map3k2	0.136919	0.0174374	0.021025	0.00119805	0.283	0.259	1	0	0.112187	0.0984166	0.00429886	0.0125618	0.332	0.302	1	0	Congruent	UU
ENSMUSG00000024384	Iws1	0.835231	0.110185	-0.014327	0.00366627	0.153	0.149	1	0	0.216026	0.19172	-0.0448067	0.0102208	0.16	0.17275	1	0	Congruent	DD
ENSMUSG00000024393	Prrc2a	9.45606e-05	0.000100942	0.0494604	0.00435647	0.149	0.1035	0.787899	0.299956	9.77294e-08	1.35699e-07	0.0836923	0.0108436	0.153	0.0955	0.00280053	0.00388859	Congruent	UU
ENSMUSG00000024400	Wdr33	0.0364848	0.0027179	-0.0545069	0.00307061	0.538	0.583	1	0	0.466421	0.333342	-0.0336483	0.0126021	0.651	0.6685	1	0	Congruent	DD
ENSMUSG00000024404	Riok3	0.227536	0.0575097	-0.0456977	0.00126385	0.201	0.214	1	0	0.619546	0.252753	-0.0116158	0.0146737	0.237	0.23025	1	0	Congruent	DD
ENSMUSG00000024413	Npc1	0.565498	0.0598068	-0.0288511	0.00142577	0.099	0.103	1	0	0.602028	0.279523	-0.0124469	0.00999101	0.107	0.1065	1	0	Congruent	DD
ENSMUSG00000024420	Zfp521	0.0441494	0.0052685	0.0669711	0.00553923	0.132	0.1105	1	0	0.128528	0.05397	0.020113	0.0111386	0.127	0.11225	1	0	Congruent	UU
ENSMUSG00000024422	Dhx16	0.00600367	0.00228441	0.0325872	0.00150352	0.103	0.077	1	0	0.00467675	0.00387933	0.0338367	0.00434673	0.1	0.07575	1	0	Congruent	UU
ENSMUSG00000024423	Impact	0.00195004	0.000995955	0.0453218	0.00194944	0.318	0.2665	1	0	0.0841598	0.122037	0.0214366	0.0176003	0.347	0.31525	1	0	Congruent	UU
ENSMUSG00000024425	Ndfip1	0.0176384	0.00380294	0.0342617	0.00392236	0.411	0.3605	1	0	0.734651	0.163319	0.00460147	0.0129159	0.479	0.4765	1	0	Congruent	UU
ENSMUSG00000024454	Hdac3	0.245629	0.0426039	0.0143487	0.000971099	0.121	0.1085	1	0	0.000901009	0.00122603	0.0488945	0.00335808	0.127	0.09475	1	0	Congruent	UU
ENSMUSG00000024456	Diaph1	0.0107998	0.00349335	0.0460128	0.00328246	0.164	0.134	1	0	0.0683801	0.132957	0.0372851	0.019933	0.161	0.1335	1	0	Congruent	UU
ENSMUSG00000024462	Gabbr1	6.84562e-10	6.41412e-11	0.139606	0.00155865	0.509	0.3925	1.70018e-05	1.59301e-06	5.91906e-16	8.39952e-16	0.183982	0.0146122	0.506	0.382	1.69617e-11	2.40697e-11	Congruent	UU
ENSMUSG00000024480	Ap3s1	0.024909	0.00570608	0.0565864	0.00405802	0.202	0.1755	1	0	0.000352711	0.000359466	0.0682318	0.0126783	0.232	0.18775	0.938123	0.123755	Congruent	UU
ENSMUSG00000024483	Ankhd1	0.880385	0.0406184	-0.0733895	0.00289128	0.4	0.3785	1	0	0.570433	0.0730487	-0.0144913	0.00977812	0.486	0.46925	1	0	Congruent	DD
ENSMUSG00000024498	Tcerg1	0.725742	0.0376933	-0.0355376	0	0.234	0.2355	1	0	0.563918	0.433951	-0.0192174	0.022161	0.265	0.25925	1	0	Congruent	DD
ENSMUSG00000024500	Ppp2r2b	0.0131619	0.00694063	0.0700131	0.00439428	0.809	0.884	1	0	0.296598	0.189649	0.00713549	0.0136952	0.882	0.9	1	0	Congruent	UU
ENSMUSG00000024511	Rab27b	0.464791	0.109987	0.00990233	0.000453295	0.161	0.1515	1	0	0.0330254	0.0521085	0.0288298	0.0181276	0.239	0.207	1	0	Congruent	UU
ENSMUSG00000024513	Mbd2	2.74656e-05	1.82418e-05	0.0690437	0.00347874	0.252	0.1915	0.68089	0.45129	0.0406337	0.0712802	0.0448903	0.0105587	0.255	0.224	1	0	Congruent	UU
ENSMUSG00000024524	Gnal	6.79415e-22	8.9924e-22	0.305582	0.0075484	0.781	0.7235	1.6874e-17	2.23335e-17	0.00134966	0.00128075	0.0606322	0.00975998	0.763	0.732	0.984016	0.0319679	Congruent	UU
ENSMUSG00000024527	Afg3l2	0.0151508	0.00178745	0.0217051	0.000937198	0.164	0.1335	1	0	0.0863013	0.134543	0.0300985	0.0108871	0.17	0.14725	1	0	Congruent	UU
ENSMUSG00000024533	Spire1	0.926275	0.00612846	-0.041334	0.00853976	0.31	0.303	1	0	0.468777	0.242443	-0.0206962	0.027704	0.372	0.37325	1	0	Congruent	DD
ENSMUSG00000024534	Sncaip	0.0183689	0.00386981	0.0338231	0.00189793	0.146	0.1195	1	0	0.108326	0.078711	0.0268462	0.00745839	0.164	0.145	1	0	Congruent	UU
ENSMUSG00000024535	Snx24	0.00436013	0.00388575	-0.0730815	0.00635603	0.114	0.144	1	0	0.100129	0.0669495	-0.00876937	0.0102334	0.178	0.15525	1	0	Congruent	DD
ENSMUSG00000024539	Ptpn2	0.0451799	0.0108483	0.0203246	0	0.159	0.134	1	0	0.00150281	0.000668138	0.0356783	0.00269431	0.179	0.14325	1	0	Congruent	UU
ENSMUSG00000024544	Ldlrad4	0.549091	0.285332	-0.0213128	0.0131538	0.74	0.7925	1	0	0.0372453	0.0727978	-0.0766085	0.0374622	0.756	0.8125	1	0	Congruent	DD
ENSMUSG00000024548	Setbp1	5.2678e-09	3.2456e-09	-0.144976	0.00305584	0.558	0.682	0.000130831	8.06077e-05	8.71947e-05	0.000167895	-0.084891	0.0154183	0.623	0.70175	0.320272	0.466586	Congruent	DD
ENSMUSG00000024558	Mapk4	4.51934e-19	3.10332e-19	0.236026	0.00709724	0.451	0.302	1.12242e-14	7.70741e-15	1.00398e-05	1.20838e-05	0.103657	0.0207644	0.431	0.3545	0.287701	0.346274	Congruent	UU
ENSMUSG00000024566	Atp9b	0.146744	0.0321418	-0.0117786	0.00405623	0.335	0.3025	1	0	0.647166	0.246272	-0.0328222	0.0116908	0.489	0.48575	1	0	Congruent	DD
ENSMUSG00000024576	Csnk1a1	0.0940615	0.0118076	-0.0414688	0.000263977	0.618	0.66	1	0	0.688687	0.303473	-0.0171838	0.0133751	0.691	0.70575	1	0	Congruent	DD
ENSMUSG00000024581	Napg	0.0551545	0.0182755	0.0238894	0	0.166	0.1425	1	0	0.0228446	0.0346514	0.0516945	0.0178902	0.188	0.159	1	0	Congruent	UU
ENSMUSG00000024583	Txnl1	0.00162048	0.000250241	0.0395014	0.00142777	0.159	0.1215	1	0	0.0130653	0.0228445	0.0368292	0.010563	0.192	0.1595	1	0	Congruent	UU
ENSMUSG00000024587	Nars	0.271209	0.0830218	0.010132	0.00148745	0.1	0.0885	1	0	0.205335	0.0870779	0.0145777	0.00332733	0.111	0.09875	1	0	Congruent	UU
ENSMUSG00000024589	Nedd4l	1.12387e-09	4.00339e-11	0.164549	0.00183497	0.824	0.8355	2.79125e-05	9.94283e-07	0.0410701	0.0303973	0.0302821	0.0167123	0.856	0.86775	1	0	Congruent	UU
ENSMUSG00000024597	Slc12a2	6.86536e-15	7.97381e-17	-0.382392	0.00466884	0.194	0.2885	1.70508e-10	1.98038e-12	9.00797e-13	1.22377e-12	-0.306659	0.03028	0.201	0.28775	2.58132e-08	3.50683e-08	Congruent	DD
ENSMUSG00000024603	Dctn4	0.181647	0.0928021	-0.0630329	0.00468052	0.165	0.1785	1	0	0.600911	0.0772032	-0.0362297	0.0123091	0.195	0.19525	1	0	Congruent	DD
ENSMUSG00000024614	Tmx3	0.00494192	0.00554767	0.0341549	0.00836365	0.214	0.1725	1	0	0.320881	0.229863	0.0165818	0.00900754	0.234	0.22025	1	0	Congruent	UU
ENSMUSG00000024617	Camk2a	1.97227e-05	1.11634e-05	0.14334	0.00397826	0.658	0.661	0.489834	0.277254	0.000768246	0.001188	0.0785622	0.0123752	0.671	0.648	0.949943	0.100114	Congruent	UU
ENSMUSG00000024622	Hmgxb3	0.0263787	0.00731504	-0.050239	0.00191306	0.098	0.119	1	0	0.605891	0.112899	-0.018533	0.00334237	0.118	0.1215	1	0	Congruent	DD
ENSMUSG00000024639	Gnaq	9.80041e-12	3.89956e-12	-0.205161	0.00463911	0.585	0.7065	2.43403e-07	9.68496e-08	2.96587e-05	4.1358e-05	-0.105678	0.0163403	0.68	0.73475	0.4633	0.503437	Congruent	DD
ENSMUSG00000024646	Cyb5a	0.00183416	0.000954885	0.0482379	0.00245995	0.123	0.091	1	0	0.283498	0.23307	0.0156182	0.00623941	0.133	0.1215	1	0	Congruent	UU
ENSMUSG00000024661	Fth1	0.799748	0.208501	-0.202286	0.0213914	0.393	0.3505	1	0	0.687301	0.230271	-0.0355192	0.0125752	0.381	0.37125	1	0	Congruent	DD
ENSMUSG00000024687	Osbp	0.00973359	0.00207846	0.0147712	0.000446744	0.185	0.1495	1	0	0.00376299	0.00532563	0.0416386	0.0177529	0.202	0.163	0.811942	0.376117	Congruent	UU
ENSMUSG00000024695	Zfp91	0.142016	0.0578843	0.00763568	0.00491871	0.108	0.092	1	0	0.000174549	0.000152514	0.0446719	0.00487436	0.111	0.07825	0.876181	0.247639	Congruent	UU
ENSMUSG00000024736	Tmem132a	4.22673e-11	5.7972e-11	0.12221	0.00717569	0.191	0.111	1.04975e-06	1.43979e-06	1.77538e-12	2.17139e-12	0.126981	0.0114935	0.181	0.10675	5.08752e-08	6.22235e-08	Congruent	UU
ENSMUSG00000024743	Syt7	8.78554e-12	7.10828e-12	0.170129	0.00257937	0.296	0.1995	2.18198e-07	1.76541e-07	7.10138e-06	1.41819e-05	0.118041	0.0195441	0.295	0.225	0.203497	0.406396	Congruent	UU
ENSMUSG00000024758	Rtn3	0.539884	0.0833252	0.0126211	0.00275776	0.721	0.7635	1	0	0.703093	0.344709	0.000732724	0.0183429	0.777	0.793	1	0	Congruent	UU
ENSMUSG00000024759	Atl3	0.0285428	0.0128986	-0.0702886	0.00457668	0.119	0.1405	1	0	0.206575	0.348892	-0.00619836	0.0206427	0.165	0.14575	1	0	Congruent	DD
ENSMUSG00000024764	Naa40	0.0206877	0.0136478	0.0362864	0.00505817	0.178	0.149	1	0	0.0199542	0.00832205	0.0263101	0.00268452	0.182	0.155	1	0	Congruent	UU
ENSMUSG00000024780	Cdc37l1	4.42453e-16	5.23264e-16	-0.461087	0.0224396	0.235	0.3335	1.09888e-11	1.29958e-11	1.62202e-07	3.21651e-07	-0.249315	0.0314279	0.306	0.36875	0.00464805	0.00921722	Congruent	DD
ENSMUSG00000024789	Jak2	0.00184294	0.00173682	0.0287242	0.0105226	0.356	0.293	1	0	0.112168	0.129928	0.018209	0.0141992	0.375	0.34175	1	0	Congruent	UU
ENSMUSG00000024805	Pcgf5	0.344332	0.0785248	0.00976396	0.00184724	0.155	0.1435	1	0	0.497181	0.180561	0.0101999	0.00935055	0.194	0.1855	1	0	Congruent	UU
ENSMUSG00000024817	Uhrf2	0.0461921	0.00700863	0.0319447	0.00320547	0.276	0.245	1	0	0.0537878	0.0511137	0.0359496	0.0129577	0.322	0.29125	1	0	Congruent	UU
ENSMUSG00000024826	Dpf2	0.0200821	0.0193198	0.0327285	0.00541973	0.119	0.094	1	0	0.0103147	0.0171487	0.0336986	0.0118433	0.109	0.082	1	0	Congruent	UU
ENSMUSG00000024830	Rps6kb2	3.83146e-10	3.45702e-10	0.134269	0.00695157	0.272	0.184	9.51581e-06	8.58585e-06	9.30522e-15	1.5987e-14	0.147962	0.00612379	0.276	0.17825	2.6665e-10	4.58122e-10	Congruent	UU
ENSMUSG00000024853	Sf3b2	0.0117883	0.00116092	0.0358996	0.00177261	0.208	0.1745	1	0	0.00808751	0.00689273	0.0536415	0.0179229	0.212	0.17825	1	0	Congruent	UU
ENSMUSG00000024855	Pacs1	3.2416e-12	4.35265e-12	0.174252	0.00837827	0.413	0.297	8.05084e-08	1.08102e-07	7.32185e-05	0.000135134	0.120178	0.0171043	0.383	0.326	0.372319	0.439135	Congruent	UU
ENSMUSG00000024892	Pcx	0.00146271	0.00139897	0.0389724	0.00587978	0.122	0.0885	1	0	0.133723	0.0303212	0.0100701	0.00458444	0.126	0.111	1	0	Congruent	UU
ENSMUSG00000024897	Apba1	1.43265e-08	1.17024e-08	-0.277914	0.00482173	0.204	0.271	0.000355814	0.000290642	0.0143181	0.0186971	-0.127291	0.0105596	0.268	0.2925	1	0	Congruent	DD
ENSMUSG00000024908	Ppp6r3	0.341047	0.0785086	-0.0710748	0.000387665	0.254	0.26	1	0	0.570396	0.275789	-0.0126047	0.0117266	0.292	0.27975	1	0	Congruent	DD
ENSMUSG00000024924	Vldlr	0.32621	0.0855701	-0.024517	0.00455698	0.214	0.195	1	0	0.205594	0.142579	-0.00358159	0.0072625	0.211	0.1915	1	0	Congruent	DD
ENSMUSG00000024935	Slc1a1	0.00126543	0.000300435	0.0743171	0.00399446	0.231	0.189	1	0	0.000641075	0.000689634	0.0556411	0.00715643	0.255	0.21	1	0	Congruent	UU
ENSMUSG00000024943	Smc5	0.408148	0.12796	0.000317241	0.00657167	0.189	0.176	1	0	0.359428	0.148744	0.0136622	0.00443213	0.203	0.19125	1	0	Congruent	UU
ENSMUSG00000024948	Map4k2	0.0552922	0.00826148	0.0161364	0.00367122	0.164	0.1405	1	0	0.000390853	0.000319317	0.0471967	0.00825945	0.151	0.11425	1	0	Congruent	UU
ENSMUSG00000024949	Sf1	0.0118816	0.0027521	0.0429485	0.00249932	0.261	0.2235	1	0	0.0199924	0.00992765	0.0259947	0.00765545	0.28	0.2455	1	0	Congruent	UU
ENSMUSG00000024955	Esrra	0.000823668	0.000881319	0.0530557	0.0050278	0.115	0.0815	1	0	3.77636e-11	6.27905e-11	0.0926987	0.00555886	0.128	0.06975	1.08215e-06	1.79932e-06	Congruent	UU
ENSMUSG00000024966	Stip1	2.58482e-07	2.2669e-07	0.0902103	0.00342575	0.155	0.0975	0.00641966	0.00563007	0.0293714	0.0336911	0.032654	0.0104169	0.114	0.09125	1	0	Congruent	UU
ENSMUSG00000024970	Spindoc	0.138391	0.0301278	0.0189756	0.00289401	0.126	0.109	1	0	0.094075	0.106528	0.023047	0.00842088	0.119	0.10225	1	0	Congruent	UU
ENSMUSG00000024975	Pdcd4	0.121703	0.032649	0.0157846	0.00448808	0.188	0.1665	1	0	7.4922e-07	9.48716e-07	0.105596	0.00903249	0.227	0.16875	0.0214696	0.0271864	Congruent	UU
ENSMUSG00000024983	Vti1a	0.480779	0.386291	-0.0853917	0.0195049	0.384	0.38	1	0	0.00793596	0.00562774	-0.0611847	0.00796333	0.583	0.62525	1	0	Congruent	DD
ENSMUSG00000024991	Eif3a	0.804726	0.204281	-0.0163713	0.00651849	0.19	0.1855	1	0	0.763308	0.208214	-0.00893671	0.0115139	0.201	0.19925	1	0	Congruent	DD
ENSMUSG00000025006	Sorbs1	0.0203145	0.0100227	0.056054	0.00379197	0.808	0.8575	1	0	0.29154	0.258865	0.0079305	0.0144382	0.846	0.855	1	0	Congruent	UU
ENSMUSG00000025016	Tm9sf3	0.00183459	0.0012318	0.0483393	0.00434472	0.226	0.181	1	0	0.497831	0.0568684	0.00801384	0.00538959	0.209	0.199	1	0	Congruent	UU
ENSMUSG00000025019	Lcor	0.250586	0.012114	-0.0139407	0.0052962	0.452	0.4205	1	0	0.712535	0.0985404	-0.00281163	0.0171554	0.549	0.5535	1	0	Congruent	DD
ENSMUSG00000025026	Add3	0.695518	0.0342029	-0.0751138	0.00341247	0.249	0.232	1	0	0.372829	0.103396	-0.0781624	0.0258293	0.286	0.28375	1	0	Congruent	DD
ENSMUSG00000025035	Arl3	0.00211183	0.000120388	0.0494154	0.000447135	0.214	0.1735	1	0	0.000693241	0.000678421	0.0503108	0.00485073	0.226	0.1815	0.777852	0.444296	Congruent	UU
ENSMUSG00000025041	Nt5c2	5.64526e-05	3.09593e-05	0.0958528	0.000722478	0.384	0.3175	0.92918	0.100155	0.00128184	0.000932718	0.0813047	0.0223886	0.406	0.355	0.75976	0.480481	Congruent	UU
ENSMUSG00000025047	Pdcd11	0.340659	0.224669	0.0038036	0.00732686	0.112	0.101	1	0	1.92037e-05	3.31216e-05	0.0534892	0.00546384	0.125	0.08375	0.307595	0.465931	Congruent	UU
ENSMUSG00000025050	Pcgf6	0.317313	0.00763656	0.0147258	0.00199343	0.101	0.092	1	0	0.140812	0.161477	0.0155448	0.0109299	0.107	0.0915	1	0	Congruent	UU
ENSMUSG00000025060	Slk	0.582192	0.168795	-0.0969776	0.00746837	0.287	0.281	1	0	0.798877	0.209187	-0.0508796	0.0102416	0.302	0.292	1	0	Congruent	DD
ENSMUSG00000025086	Trub1	0.230741	0.0582607	0.0144933	0.00196181	0.114	0.101	1	0	0.0852559	0.102569	0.0233225	0.012551	0.12	0.10025	1	0	Congruent	UU
ENSMUSG00000025092	Hspa12a	6.43577e-05	9.07378e-06	0.0737619	0	0.164	0.119	1	0	0.00011074	0.000113922	0.0642419	0.00504305	0.19	0.146	0.774903	0.390087	Congruent	UU
ENSMUSG00000025104	Hdgfl3	0.00692514	0.00253266	0.0524985	0.008141	0.318	0.2755	1	0	0.0893056	0.038312	0.0152704	0.0073765	0.341	0.31475	1	0	Congruent	UU
ENSMUSG00000025138	Sirt7	0.0400652	0.0132712	0.0119938	0.0063227	0.117	0.095	1	0	0.0230459	0.0317881	0.0290618	0.00715414	0.107	0.085	1	0	Congruent	UU
ENSMUSG00000025145	Lrrc45	0.000102039	1.32308e-05	0.0627584	0.000501174	0.121	0.0825	1	0	0.00565166	0.0082743	0.0573566	0.0200137	0.111	0.07875	0.504844	0.571796	Congruent	UU
ENSMUSG00000025151	Maged1	1.67284e-16	1.4581e-16	0.217155	0.00602565	0.367	0.2445	4.15466e-12	3.62133e-12	6.02193e-17	1.1549e-16	0.186151	0.00898814	0.354	0.241	1.72564e-12	3.30949e-12	Congruent	UU
ENSMUSG00000025156	Gps1	0.000714867	0.000443843	0.052418	0.00148025	0.131	0.0955	1	0	1.37341e-05	2.30219e-05	0.0607717	0.00718587	0.118	0.07775	0.298717	0.471032	Congruent	UU
ENSMUSG00000025162	Csnk1d	0.0429575	0.0186343	0.0334976	0.00195616	0.119	0.0975	1	0	0.259108	0.232837	0.0105116	0.0122068	0.105	0.09325	1	0	Congruent	UU
ENSMUSG00000025170	Rab40b	7.39194e-09	3.78052e-09	0.109875	0.00288311	0.191	0.1225	0.000183586	9.38931e-05	0.000127819	0.000255401	0.0909962	0.0131028	0.212	0.158	0.252551	0.498308	Congruent	UU
ENSMUSG00000025173	Wdr45b	0.490257	0.0714827	0.00676117	0.00191666	0.126	0.117	1	0	0.00173357	0.00167165	0.0383334	0.0104588	0.135	0.10125	0.772415	0.45517	Congruent	UU
ENSMUSG00000025184	R3hcc1l	0.193883	0.0807847	-0.0507874	0.00322902	0.116	0.1285	1	0	0.0538967	0.0456766	-0.0424972	0.0129027	0.124	0.1435	1	0	Congruent	DD
ENSMUSG00000025189	Cnnm1	0.000780759	0.000373807	0.0568892	0.00279746	0.192	0.15	1	0	7.04919e-05	9.49923e-05	0.0853002	0.016819	0.212	0.161	0.502311	0.574683	Congruent	UU
ENSMUSG00000025190	Got1	2.33891e-10	2.88095e-10	0.122351	0.00490689	0.178	0.1055	5.80891e-06	7.15513e-06	0.000688957	0.00136247	0.0659737	0.0143068	0.174	0.13025	0.416322	0.474237	Congruent	UU
ENSMUSG00000025195	Dnmbp	0.288914	0.0331289	0.025251	0.00140354	0.156	0.1435	1	0	0.000519615	0.00079724	0.0599562	0.00545256	0.181	0.14225	1	0	Congruent	UU
ENSMUSG00000025198	Erlin1	0.000692283	0.00019636	0.0765548	0.00277967	0.193	0.153	1	0	1.83961e-07	1.8025e-07	0.0967235	0.00492474	0.226	0.165	0.00527157	0.00516525	Congruent	UU
ENSMUSG00000025199	Chuk	0.457137	0.011086	0.00341882	0.000806753	0.258	0.244	1	0	0.0138635	0.00819889	0.0255823	0.00657528	0.3	0.26175	1	0	Congruent	UU
ENSMUSG00000025203	Scd2	3.11567e-09	3.54232e-09	-0.390471	0.0119956	0.312	0.375	7.73808e-05	8.7977e-05	0.0128466	0.0175397	-0.101625	0.0365927	0.316	0.3445	1	0	Congruent	DD
ENSMUSG00000025204	Ndufb8	6.63343e-07	8.54798e-07	0.0849998	0.00792345	0.141	0.0875	0.0164748	0.0212298	4.80793e-05	3.62868e-05	0.0562226	0.0100925	0.124	0.08675	0.758494	0.483012	Congruent	UU
ENSMUSG00000025212	Sfxn3	0.00913024	0.00618252	0.0482996	0.00482336	0.148	0.119	1	0	8.19062e-14	9.2443e-14	0.132532	0.0126769	0.191	0.1105	2.3471e-09	2.64905e-09	Congruent	UU
ENSMUSG00000025220	Oga	0.000252467	2.12443e-05	0.0717762	0.00144547	0.376	0.3135	1	0	0.000288655	0.000530596	0.0882215	0.0140495	0.411	0.34975	0.532077	0.540796	Congruent	UU
ENSMUSG00000025221	Kcnip2	8.33584e-23	1.2731e-23	0.273682	0.000394257	0.398	0.2555	2.07029e-18	3.16187e-19	1.22971e-16	2.40551e-16	0.208683	0.0109758	0.391	0.275	3.52385e-12	6.89322e-12	Congruent	UU
ENSMUSG00000025225	Nfkb2	8.96794e-12	4.83933e-12	0.120409	0.00100904	0.147	0.0775	2.22728e-07	1.2019e-07	1.10548e-15	2.00877e-15	0.102283	0.00329436	0.118	0.052	3.16785e-11	5.75632e-11	Congruent	UU
ENSMUSG00000025232	Hexa	0.126975	0.0769287	0.0173071	0.00492346	0.102	0.087	1	0	0.284565	0.172987	0.00900746	0.00485646	0.102	0.092	1	0	Congruent	UU
ENSMUSG00000025234	Arih1	0.0458798	0.0103812	-0.0453578	0.00332371	0.662	0.724	1	0	0.182131	0.287784	-0.0489241	0.0239584	0.681	0.71675	1	0	Congruent	DD
ENSMUSG00000025235	Bbs4	0.0600603	0.0459789	0.03619	0.00352206	0.1	0.0825	1	0	0.043052	0.0325497	0.0272732	0.00326343	0.123	0.10325	1	0	Congruent	UU
ENSMUSG00000025237	Parp6	0.125736	0.0611562	0.0255219	0.00693385	0.22	0.197	1	0	0.00297836	0.00489025	0.0534594	0.0122922	0.252	0.208	0.870952	0.258096	Congruent	UU
ENSMUSG00000025240	Sacm1l	0.198528	0.021372	0.00384077	0.00125504	0.238	0.218	1	0	0.416095	0.347935	0.0131752	0.0138944	0.259	0.248	1	0	Congruent	UU
ENSMUSG00000025241	Fyco1	0.117929	0.0106973	0.0176785	0.00186327	0.156	0.1365	1	0	0.00202758	0.00190612	0.0563536	0.0101007	0.176	0.141	0.877303	0.245394	Congruent	UU
ENSMUSG00000025245	Lztfl1	0.0921457	0.0633024	0.019433	0.00713699	0.2	0.176	1	0	0.0989664	0.0176564	0.0284751	0.00468402	0.226	0.20575	1	0	Congruent	UU
ENSMUSG00000025255	Zfhx4	2.77479e-08	3.36122e-08	0.128196	0.00316743	0.217	0.1455	0.000689147	0.000834792	0.00722167	0.00993391	0.0648989	0.0063301	0.214	0.18075	1	0	Congruent	UU
ENSMUSG00000025261	Huwe1	0.541697	0.0634461	-0.00312319	0.00160462	0.798	0.821	1	0	0.588297	0.403104	-0.026804	0.0237936	0.804	0.826	1	0	Congruent	DD
ENSMUSG00000025266	Gnl3l	0.0479221	0.00119367	0.0197094	0.000935479	0.167	0.142	1	0	0.00294793	0.00416912	0.0608319	0.0103375	0.181	0.14525	1	0	Congruent	UU
ENSMUSG00000025269	Apex2	0.00437815	0.00311164	0.0589801	0.00216086	0.242	0.2025	1	0	0.0553721	0.0452007	0.0423045	0.0150549	0.26	0.232	1	0	Congruent	UU
ENSMUSG00000025272	Tro	2.2561e-05	2.92113e-05	0.0832751	0.0114341	0.222	0.1645	0.523662	0.673644	4.74224e-11	9.32194e-11	0.13556	0.00821577	0.262	0.1795	1.35894e-06	2.67129e-06	Congruent	UU
ENSMUSG00000025277	Abhd6	0.00298661	3.41297e-05	0.0458888	0.00191127	0.147	0.114	1	0	0.00223806	0.00273782	0.0392583	0.00848344	0.164	0.12975	1	0	Congruent	UU
ENSMUSG00000025278	Flnb	0.480215	0.0780783	-0.0508994	0.00292963	0.209	0.212	1	0	0.370698	0.251064	-0.0410935	0.0178162	0.231	0.24	1	0	Congruent	DD
ENSMUSG00000025279	Dnase1l3	7.77611e-20	1.05592e-19	0.268707	0.00344393	0.179	0.08	1.93127e-15	2.62248e-15	7.10505e-14	7.80914e-14	0.162481	0.00828657	0.14	0.0725	2.03602e-09	2.23779e-09	Congruent	UU
ENSMUSG00000025290	Rps24	9.4692e-07	8.48138e-07	0.0862698	0.00296984	0.134	0.0825	0.0235177	0.0210644	0.0035276	0.00414071	0.0389262	0.0128458	0.118	0.0895	1	0	Congruent	UU
ENSMUSG00000025318	Jph3	9.42769e-09	6.67287e-09	0.0963846	0.000494613	0.164	0.1	0.000234146	0.000165727	6.33566e-06	6.67163e-06	0.0660956	0.00411641	0.142	0.09875	0.181555	0.191182	Congruent	UU
ENSMUSG00000025332	Kdm5c	0.257784	0.0854308	0.00678404	0.00611387	0.204	0.1865	1	0	0.0012023	0.00232792	0.0628861	0.0171765	0.234	0.18525	0.739742	0.483876	Congruent	UU
ENSMUSG00000025362	Rps26	0.0552978	0.000759159	0.02383	0.00147739	0.108	0.089	1	0	0.000150171	0.000160497	0.0568584	0.0031586	0.117	0.0835	1	0	Congruent	UU
ENSMUSG00000025369	Smarcc2	0.0165326	0.010406	0.0203206	0.00400666	0.192	0.16	1	0	0.00056849	0.000447061	0.0595826	0.00383592	0.188	0.15	1	0	Congruent	UU
ENSMUSG00000025370	Cdh9	1.69221e-07	8.29607e-08	0.154908	0.00404633	0.433	0.351	0.00420277	0.00206041	0.54946	0.0787781	0.0124063	0.0100916	0.469	0.46475	1	0	Congruent	UU
ENSMUSG00000025372	Baiap2	1.44244e-21	1.78433e-21	0.326063	0.00606735	0.69	0.61	3.58244e-17	4.43156e-17	3.60381e-14	4.96317e-14	0.217947	0.00564017	0.665	0.58975	1.03271e-09	1.42225e-09	Congruent	UU
ENSMUSG00000025375	Aatk	4.41452e-10	1.33447e-10	-0.274608	0.00061288	0.204	0.2805	1.09639e-05	3.31428e-06	0.81741	0.143627	-0.0387777	0.00721937	0.239	0.235	1	0	Congruent	DD
ENSMUSG00000025393	Atp5b	3.3839e-10	1.37107e-10	0.171998	0.00387886	0.364	0.273	8.40426e-06	3.40518e-06	3.36463e-13	3.99087e-13	0.166199	0.00869133	0.374	0.272	9.64169e-09	1.14362e-08	Congruent	UU
ENSMUSG00000025409	Mbd6	0.0586504	0.0110014	0.0328335	0.00148312	0.11	0.0915	1	0	2.33398e-08	4.34814e-08	0.0777501	0.00452577	0.113	0.0645	0.000668824	0.001246	Congruent	UU
ENSMUSG00000025410	Dctn2	0.101001	0.0577804	0.0140395	0.00243296	0.12	0.102	1	0	0.0856336	0.0828473	0.0219111	0.00947777	0.114	0.09675	1	0	Congruent	UU
ENSMUSG00000025422	Agap2	5.57827e-16	6.83625e-16	0.177305	0.00548218	0.275	0.166	1.38542e-11	1.69785e-11	1.29383e-17	2.03904e-17	0.150606	0.00561682	0.245	0.14425	3.70759e-13	5.84309e-13	Congruent	UU
ENSMUSG00000025423	Pias2	0.245087	0.0690507	-0.0155107	0.00746144	0.567	0.609	1	0	0.18796	0.0805082	-0.0419045	0.0134781	0.655	0.6805	1	0	Congruent	DD
ENSMUSG00000025427	Rnf165	0.00680895	0.00577562	0.0599619	0.00470545	0.175	0.1435	1	0	0.00476029	0.00861941	0.0582593	0.0156615	0.196	0.1585	1	0	Congruent	UU
ENSMUSG00000025428	Atp5a1	6.34221e-06	9.74947e-07	0.0891857	0.00337935	0.271	0.205	0.157515	0.0242138	2.17846e-06	2.57805e-06	0.104925	0.0136112	0.307	0.23925	0.0624258	0.0738766	Congruent	UU
ENSMUSG00000025429	Pstpip2	5.74915e-07	6.61265e-07	-0.145965	0.0107102	0.061	0.1055	0.0142786	0.0164232	1.56679e-11	2.0337e-11	-0.166877	0.0187701	0.083	0.14775	4.48979e-07	5.82776e-07	Congruent	DD
ENSMUSG00000025437	Usp33	1.74432e-05	1.13062e-06	0.0686326	0.00266604	0.35	0.2775	0.433219	0.0280801	0.00395422	0.00428453	0.0544715	0.0207051	0.352	0.30025	0.760457	0.479086	Congruent	UU
ENSMUSG00000025468	Caly	1.47591e-21	4.26279e-22	0.221543	0.00399446	0.31	0.178	3.66558e-17	1.05871e-17	1.81543e-11	2.04114e-11	0.127313	0.00467806	0.249	0.16725	5.20229e-07	5.84908e-07	Congruent	UU
ENSMUSG00000025499	Hras	6.05434e-14	6.59428e-14	0.138835	0.00453508	0.157	0.078	1.50366e-09	1.63775e-09	0.000888185	0.000768235	0.050177	0.0053222	0.128	0.097	1	0	Congruent	UU
ENSMUSG00000025508	Rplp2	2.65577e-13	3.66098e-13	0.139436	0.00580451	0.19	0.102	6.59586e-09	9.09241e-09	2.18068e-05	2.70042e-05	0.0663284	0.00701336	0.144	0.10025	0.467113	0.524419	Congruent	UU
ENSMUSG00000025531	Chm	0.273884	0.0797132	-0.00559487	0.00715626	0.3	0.2785	1	0	0.368979	0.208779	-0.0433727	0.0117489	0.342	0.3485	1	0	Congruent	DD
ENSMUSG00000025544	Tm9sf2	0.030441	0.0152414	0.0105387	0.00384556	0.226	0.192	1	0	0.0141576	0.0198159	0.0644799	0.025458	0.228	0.191	0.942319	0.115362	Congruent	UU
ENSMUSG00000025551	Fgf14	5.33448e-70	7.39669e-70	0.583023	0.00721278	0.997	0.9925	1.32487e-65	1.83704e-65	2.34365e-14	4.21014e-14	0.215165	0.0247458	0.999	0.99725	6.71595e-10	1.20646e-09	Congruent	UU
ENSMUSG00000025558	Dock9	0.000335713	0.000248573	-0.231055	0.0101287	0.259	0.298	1	0	0.0921093	0.149373	-0.100577	0.022022	0.287	0.3095	1	0	Congruent	DD
ENSMUSG00000025571	Tnrc6c	0.0573874	0.0534897	-0.0460469	0.0122701	0.72	0.7895	1	0	0.181108	0.179113	-0.0594687	0.0203781	0.764	0.79425	1	0	Congruent	DD
ENSMUSG00000025576	Rbfox3	1.27901e-21	1.73282e-21	0.297411	0.0110924	0.802	0.7925	3.17654e-17	4.30364e-17	0.000130578	0.000255855	0.10631	0.0148943	0.833	0.82475	0.307123	0.468712	Congruent	UU
ENSMUSG00000025579	Gaa	4.61797e-11	5.03502e-11	0.139266	0.00472069	0.211	0.1295	1.14692e-06	1.2505e-06	3.18566e-12	6.34858e-12	0.135673	0.00652037	0.212	0.131	9.12882e-08	1.81925e-07	Congruent	UU
ENSMUSG00000025583	Rptor	0.202164	0.0115522	-0.0114003	0	0.258	0.236	1	0	0.457569	0.369032	-0.0218275	0.02064	0.285	0.2865	1	0	Congruent	DD
ENSMUSG00000025584	Pde8a	2.62589e-24	1.78666e-24	-0.390706	0.00761437	0.073	0.1805	6.52167e-20	4.43735e-20	1.87014e-16	3.68736e-16	-0.235935	0.0167849	0.093	0.18025	5.35908e-12	1.05665e-11	Congruent	DD
ENSMUSG00000025586	Cpeb1	0.0713853	0.0105179	-0.0730292	0.00269759	0.12	0.137	1	0	0.734151	0.226453	-0.0245606	0.00451277	0.152	0.15075	1	0	Congruent	DD
ENSMUSG00000025607	Copg2	7.88747e-06	4.73097e-06	0.0622507	0.00359838	0.308	0.237	0.195893	0.117498	0.0170803	0.00816883	0.0319867	0.0071963	0.298	0.262	1	0	Congruent	UU
ENSMUSG00000025613	Cct8	0.000699144	6.1461e-05	0.0432341	0.0029555	0.129	0.093	1	0	0.0047433	0.00864852	0.0489825	0.0145173	0.124	0.092	0.776139	0.447722	Congruent	UU
ENSMUSG00000025626	Phf6	0.151901	0.0911312	0.0136191	0.0076449	0.18	0.1605	1	0	0.439311	0.362578	0.0121995	0.00913586	0.191	0.18	1	0	Congruent	UU
ENSMUSG00000025651	Uqcrc1	1.37751e-06	7.67999e-07	0.086113	0.00242256	0.164	0.1095	0.0342118	0.019074	1.04312e-05	1.7095e-05	0.0638119	0.00748999	0.164	0.1165	0.290985	0.474055	Congruent	UU
ENSMUSG00000025656	Arhgef9	7.91801e-05	9.62846e-06	0.118471	0.00155905	0.68	0.669	1	0	0.341798	0.302784	0.0556	0.0215322	0.716	0.73375	1	0	Congruent	UU
ENSMUSG00000025658	Cnksr2	2.11673e-20	8.37899e-21	0.245352	0.00105577	0.916	0.897	5.25712e-16	2.08101e-16	3.47172e-08	3.1909e-08	0.156642	0.014111	0.932	0.9355	0.000994856	0.000914383	Congruent	UU
ENSMUSG00000025702	Marchf8	3.15018e-05	3.78953e-05	-0.109893	0.0104631	0.086	0.1275	0.558437	0.624464	0.0130297	0.0155068	-0.0588118	0.00868828	0.106	0.1295	1	0	Congruent	DD
ENSMUSG00000025724	Sec11a	0.155555	0.0583876	0.0137843	0.00238853	0.137	0.1195	1	0	0.0221583	0.0260587	0.0326413	0.00874735	0.145	0.12075	1	0	Congruent	UU
ENSMUSG00000025730	Rab40c	0.353008	0.147265	-0.0760903	0.00438427	0.219	0.2265	1	0	0.412828	0.160704	-0.0336298	0.0260183	0.229	0.22275	1	0	Congruent	DD
ENSMUSG00000025738	Fbxl16	3.57231e-12	3.73508e-13	0.16392	0.000876785	0.296	0.2	8.87218e-08	9.27643e-09	1.30547e-09	2.59992e-09	0.141484	0.0158894	0.296	0.212	3.74095e-05	7.45034e-05	Congruent	UU
ENSMUSG00000025757	Hspa4l	3.11477e-11	1.23207e-11	0.125797	0.00180476	0.254	0.1645	7.73584e-07	3.05996e-07	0.000281996	0.000223404	0.0726934	0.00704622	0.266	0.21975	0.847132	0.305736	Congruent	UU
ENSMUSG00000025766	D3Ertd751e	0.191576	0.0895821	0.0174889	0.00287094	0.134	0.1185	1	0	0.540901	0.232216	0.00195605	0.00249522	0.125	0.11775	1	0	Congruent	UU
ENSMUSG00000025777	Gdap1	0.000668944	0.000778514	0.0646082	0.00604322	0.195	0.151	1	0	0.00380394	0.00717125	0.0680622	0.0134197	0.22	0.18025	1	0	Congruent	UU
ENSMUSG00000025781	Atp5c1	0.00654403	0.000668143	0.0448795	0.00087117	0.224	0.1865	1	0	0.00263594	0.00165811	0.0569682	0.0102595	0.257	0.21875	1	0	Congruent	UU
ENSMUSG00000025782	Taf3	0.953211	0.0601321	-0.0212936	0.00452993	0.15	0.1485	1	0	0.498065	0.260275	-0.0214005	0.0123476	0.148	0.15475	1	0	Congruent	DD
ENSMUSG00000025790	Slco3a1	0.00246508	0.00180775	-0.129014	0.0112104	0.184	0.218	1	0	0.139934	0.0964906	-0.0614342	0.00797421	0.234	0.2495	1	0	Congruent	DD
ENSMUSG00000025794	Rpl14	3.12372e-06	2.85401e-06	0.0670183	0.00303162	0.113	0.0675	0.0775807	0.0708822	0.119842	0.111813	0.014393	0.00850029	0.1	0.0845	1	0	Congruent	UU
ENSMUSG00000025809	Itgb1	0.142793	0.000914126	0.00613466	0.00137269	0.16	0.141	1	0	0.133237	0.139969	0.0228704	0.00648761	0.171	0.15325	1	0	Congruent	UU
ENSMUSG00000025855	Prkar1b	2.22493e-05	1.17134e-05	0.0629604	0.000481539	0.164	0.115	0.552584	0.290914	0.00281737	0.00448455	0.0573857	0.0163313	0.174	0.1355	0.756159	0.487682	Congruent	UU
ENSMUSG00000025860	Xiap	0.981548	0.016272	-0.0343483	0.00428631	0.18	0.177	1	0	0.301355	0.15084	-0.0357279	0.0133016	0.183	0.19375	1	0	Congruent	DD
ENSMUSG00000025862	Stag2	0.0709777	0.0145071	0.00855578	0.00242684	0.361	0.3235	1	0	0.374988	0.252235	0.00628262	0.0181973	0.388	0.36625	1	0	Congruent	UU
ENSMUSG00000025867	Cplx2	5.51328e-07	5.60015e-07	0.0951085	0.00336759	0.179	0.12	0.0136928	0.0139085	2.31424e-06	2.77889e-06	0.0859753	0.0118322	0.184	0.1325	0.0663169	0.0796318	Congruent	UU
ENSMUSG00000025880	Smad7	0.000345756	0.000232012	-0.118848	0.00276586	0.075	0.1065	1	0	0.0006056	0.00037908	-0.073512	0.00605506	0.08	0.10775	1	0	Congruent	DD
ENSMUSG00000025889	Snca	4.2482e-20	4.38333e-20	0.241052	0.00236326	0.383	0.2435	1.05508e-15	1.08864e-15	0.000494143	0.000568032	0.0828506	0.0311198	0.375	0.31475	0.603056	0.487062	Congruent	UU
ENSMUSG00000025899	Alkbh8	0.402851	0.100204	-0.0067067	0.0049598	0.17	0.1575	1	0	0.615479	0.266045	-0.00654496	0.0112045	0.19	0.183	1	0	Congruent	DD
ENSMUSG00000025907	Rb1cc1	0.380662	0.0404525	-0.0201057	0.00238152	0.374	0.348	1	0	0.447455	0.153425	-0.011491	0.00357563	0.527	0.54525	1	0	Congruent	DD
ENSMUSG00000025909	Sntg1	2.58706e-08	1.61602e-09	0.0100894	0.00120434	0.931	0.9405	0.000642522	4.01355e-05	0.00920848	0.0117081	0.0398406	0.01655	0.941	0.95125	1	0	Congruent	UU
ENSMUSG00000025915	Sgk3	2.84408e-07	1.70039e-07	0.103716	0.00452391	0.4	0.306	0.00706356	0.00422309	1.34802e-05	2.26603e-05	0.107381	0.0152968	0.441	0.3695	0.298115	0.474896	Congruent	UU
ENSMUSG00000025920	Stau2	0.229704	0.0199004	-0.00499418	0.0037984	0.587	0.6415	1	0	0.613048	0.345849	-0.00323874	0.0095615	0.666	0.68625	1	0	Congruent	DD
ENSMUSG00000025958	Creb1	0.369533	0.105154	-0.0223193	0.00412178	0.217	0.2	1	0	0.553718	0.427172	-0.064297	0.022077	0.233	0.23475	1	0	Congruent	DD
ENSMUSG00000025959	Klf7	0.858178	0.126394	-0.0678338	0.00194423	0.23	0.2185	1	0	0.206641	0.136476	-0.047863	0.0189741	0.242	0.25625	1	0	Congruent	DD
ENSMUSG00000025964	Adam23	1.11662e-09	8.33979e-10	0.16629	0.00215994	0.797	0.8015	2.77323e-05	2.07127e-05	0.000313863	0.000570818	0.0931214	0.0173801	0.832	0.82425	0.673776	0.469687	Congruent	UU
ENSMUSG00000025968	Ndufs1	0.392969	0.0942087	0.0218436	0.000426391	0.231	0.218	1	0	0.00566541	0.00584961	0.0459484	0.0107709	0.261	0.2225	1	0	Congruent	UU
ENSMUSG00000025979	Mob4	0.367116	0.357047	-0.0318168	0.0135989	0.118	0.128	1	0	0.876037	0.0561344	-0.0086487	0.00451535	0.133	0.13025	1	0	Congruent	DD
ENSMUSG00000025980	Hspd1	2.86793e-05	1.27081e-06	0.0705915	0.00297996	0.131	0.088	0.712279	0.0315618	2.28931e-05	4.0053e-05	0.067602	0.00723027	0.12	0.08125	0.311968	0.46107	Congruent	UU
ENSMUSG00000025981	Coq10b	5.23937e-05	1.89144e-05	0.0697091	0.00101004	0.11	0.0725	0.98454	0.021864	0.0152495	0.0168056	0.0410647	0.00814116	0.116	0.09225	1	0	Congruent	UU
ENSMUSG00000025982	Sf3b1	8.43139e-07	6.60253e-07	0.102723	0.00331645	0.464	0.381	0.0209402	0.0163981	0.0919147	0.0990986	0.0491483	0.0127303	0.625	0.6165	1	0	Congruent	UU
ENSMUSG00000025986	Slc39a10	0.00409681	0.000668843	0.0474424	0.00228885	0.183	0.1465	1	0	0.532579	0.397582	0.0103584	0.0140345	0.181	0.174	1	0	Congruent	UU
ENSMUSG00000025995	Wdr75	0.145074	0.001106	0.00545443	0	0.126	0.109	1	0	0.0773636	0.0823368	0.0337743	0.00554647	0.138	0.1195	1	0	Congruent	UU
ENSMUSG00000026000	Lancl1	0.00760309	0.00120327	0.0347807	0	0.198	0.1625	1	0	0.000833942	0.00164876	0.0650751	0.0119112	0.231	0.18225	0.455599	0.40146	Congruent	UU
ENSMUSG00000026004	Kansl1l	0.568318	0.138518	-0.0356022	0.00782199	0.408	0.3805	1	0	0.66783	0.163545	-0.0184327	0.0152441	0.456	0.45775	1	0	Congruent	DD
ENSMUSG00000026014	Raph1	0.00248856	0.00115502	0.0508572	0.000861241	0.224	0.1815	1	0	0.0252299	0.00874435	0.0430321	0.01091	0.229	0.2015	1	0	Congruent	UU
ENSMUSG00000026017	Carf	0.212918	0.0281231	0.0251626	0.00194035	0.127	0.1135	1	0	0.00287036	0.00349346	0.0532449	0.0103064	0.152	0.1185	0.904316	0.191368	Congruent	UU
ENSMUSG00000026018	Ica1l	0.000361932	0.000292015	0.0623723	0.00469462	0.183	0.139	1	0	0.00124711	0.00194334	0.0623971	0.00779656	0.199	0.161	0.949293	0.101414	Congruent	UU
ENSMUSG00000026019	Wdr12	0.262907	0.0342329	0.0118858	0.000992837	0.1	0.0885	1	0	0.433572	0.368997	0.0149745	0.0131147	0.119	0.11025	1	0	Congruent	UU
ENSMUSG00000026020	Nop58	0.0538901	0.0157695	0.0482618	0.00344559	0.125	0.106	1	0	0.0340078	0.0222063	0.0318878	0.00631173	0.126	0.10525	1	0	Congruent	UU
ENSMUSG00000026021	Sumo1	0.0253803	0.0303888	0.0477646	0.00863952	0.191	0.1585	1	0	0.00346583	0.00259009	0.0392116	0.00955737	0.212	0.17425	1	0	Congruent	UU
ENSMUSG00000026028	Trak2	0.0431404	0.0247749	-0.0409246	0.00570709	0.105	0.125	1	0	0.406116	0.244278	-0.0191194	0.0127634	0.134	0.14	1	0	Congruent	DD
ENSMUSG00000026032	Ndufb3	9.13572e-05	6.59763e-05	0.0603585	0.00383151	0.159	0.1135	1	0	5.46007e-06	3.98358e-06	0.0732177	0.00549535	0.161	0.115	0.156464	0.114153	Congruent	UU
ENSMUSG00000026037	Orc2	0.205635	0.136134	0.0179357	0.00567008	0.144	0.129	1	0	0.380599	0.423559	0.00733437	0.015516	0.16	0.14725	1	0	Congruent	UU
ENSMUSG00000026048	Ercc5	0.0161965	0.0053694	0.0353888	0.000974345	0.131	0.105	1	0	0.419739	0.345189	0.0135696	0.00942683	0.129	0.12075	1	0	Congruent	UU
ENSMUSG00000026058	Khdrbs2	3.24175e-15	3.68435e-15	0.264803	0.00629961	0.303	0.19	8.05121e-11	9.15046e-11	0.00204293	0.00389405	0.157569	0.00980524	0.401	0.362	1	0	Congruent	UU
ENSMUSG00000026074	Map4k4	0.000285309	0.000223096	-0.172905	0.00572935	0.274	0.316	1	0	0.028982	0.0319859	-0.138292	0.0185411	0.286	0.3015	1	0	Congruent	DD
ENSMUSG00000026077	Npas2	1.8003e-15	8.99557e-16	0.232625	0.00381124	0.523	0.399	4.47121e-11	2.23414e-11	3.24435e-08	3.75454e-08	0.175771	0.0248323	0.466	0.3825	0.0009297	0.0010759	Congruent	UU
ENSMUSG00000026082	Rev1	0.000232326	0.000242389	0.0998688	0.00931934	0.494	0.432	1	0	8.9098e-10	1.67708e-09	0.167424	0.0233903	0.573	0.49825	2.55319e-05	4.80585e-05	Congruent	UU
ENSMUSG00000026083	Eif5b	0.179174	0.000431043	0.0034228	0.00044057	0.195	0.176	1	0	0.128207	0.136865	0.0157776	0.0141569	0.206	0.184	1	0	Congruent	UU
ENSMUSG00000026090	Cracdl	1.81601e-21	2.37781e-21	0.273131	0.00632698	0.527	0.3805	4.51023e-17	5.90553e-17	6.61116e-08	7.67729e-08	0.174239	0.018516	0.582	0.52075	0.00189449	0.0022	Congruent	UU
ENSMUSG00000026109	Tmeff2	2.13642e-35	3.01636e-35	-0.890626	0.00818258	0.654	0.767	5.30602e-31	7.49144e-31	2.37256e-21	4.74512e-21	-0.755924	0.0394512	0.724	0.79625	6.79881e-17	1.35976e-16	Congruent	DD
ENSMUSG00000026110	Mgat4a	0.0141477	0.00579554	0.0246856	0.00277967	0.163	0.1335	1	0	0.0361893	0.0272343	0.0206514	0.000959855	0.165	0.141	1	0	Congruent	UU
ENSMUSG00000026113	Inpp4a	2.55563e-10	2.67858e-11	0.151244	0.00414523	0.324	0.2315	6.34717e-06	6.65252e-07	2.72473e-05	3.71996e-05	0.102833	0.00706827	0.354	0.29425	0.451306	0.469003	Congruent	UU
ENSMUSG00000026116	Tmem131	0.0174621	0.00216737	0.0310856	0.000779625	0.309	0.2685	1	0	0.0648605	0.0910277	0.0178581	0.0170883	0.341	0.30075	1	0	Congruent	UU
ENSMUSG00000026123	Plekhb2	0.00607437	0.00666456	0.0411415	0.00700098	0.113	0.084	1	0	0.029013	0.0299385	0.0287482	0.00749444	0.103	0.083	1	0	Congruent	UU
ENSMUSG00000026131	Dst	8.34703e-10	1.02415e-09	-0.235188	0.00461002	0.843	0.91	2.07307e-05	2.54357e-05	0.0590341	0.102484	-0.0918271	0.0234369	0.88	0.89225	1	0	Congruent	DD
ENSMUSG00000026141	Col19a1	0.481333	0.145633	-0.221647	0.00929871	0.126	0.13	1	0	0.0605323	0.0792486	-0.0519999	0.0266317	0.115	0.134	1	0	Congruent	DD
ENSMUSG00000026150	Mff	0.299879	0.128024	-0.0612362	0.00897011	0.223	0.2305	1	0	0.815962	0.261986	-0.0397253	0.00946681	0.242	0.23775	1	0	Congruent	DD
ENSMUSG00000026153	Fam135a	0.00733695	4.59478e-05	0.0193829	0.00110385	0.337	0.288	1	0	0.604609	0.368022	1.21714e-05	0.020551	0.333	0.3225	1	0	Congruent	UU
ENSMUSG00000026155	Smap1	0.241858	0.0450767	-0.0014489	0.000409612	0.248	0.228	1	0	0.440668	0.25622	-0.0466421	0.00747306	0.258	0.263	1	0	Congruent	DD
ENSMUSG00000026158	Ogfrl1	0.000658313	0.00049746	0.0447854	0.0034373	0.13	0.0935	1	0	0.00247327	0.00198048	0.0486736	0.00725175	0.131	0.10075	0.95523	0.0895399	Congruent	UU
ENSMUSG00000026159	Agfg1	0.801621	0.208167	-0.0113964	0.00865403	0.233	0.226	1	0	0.376896	0.199956	-0.0345698	0.0141618	0.25	0.254	1	0	Congruent	DD
ENSMUSG00000026171	Rnf25	0.497612	0.169692	-0.000311204	0.00676936	0.166	0.156	1	0	0.635861	0.353688	-0.0130566	0.011126	0.185	0.19025	1	0	Congruent	DD
ENSMUSG00000026197	Zfand2b	0.279629	0.187622	0.0164382	0.00810585	0.129	0.1165	1	0	9.15508e-08	1.80809e-07	0.0744726	0.0101453	0.117	0.066	0.00262348	0.00518128	Congruent	UU
ENSMUSG00000026202	Tuba4a	1.11283e-09	1.35299e-09	0.109887	0.00498359	0.152	0.087	2.76383e-05	3.36028e-05	2.57838e-11	4.81898e-11	0.116264	0.00486723	0.162	0.0955	7.3886e-07	1.38093e-06	Congruent	UU
ENSMUSG00000026204	Ptprn	1.79792e-29	1.00725e-29	0.345324	0.00346397	0.802	0.7515	4.46532e-25	2.50162e-25	7.89046e-32	1.49097e-31	0.331988	0.0075694	0.74	0.65025	2.26109e-27	4.27252e-27	Congruent	UU
ENSMUSG00000026207	Speg	2.23409e-12	2.33172e-12	0.194206	0.00419984	0.325	0.227	5.54858e-08	5.79106e-08	3.74515e-16	7.43682e-16	0.177721	0.0141367	0.322	0.213	1.07321e-11	2.1311e-11	Congruent	UU
ENSMUSG00000026219	Trip12	8.93941e-05	8.9866e-05	-0.0935188	0.00321304	0.669	0.751	0.820996	0.25315	0.21274	0.146785	-0.040393	0.0198091	0.743	0.768	1	0	Congruent	DD
ENSMUSG00000026223	Itm2c	5.73812e-37	1.41718e-38	0.354786	0.00233442	0.447	0.2505	1.42512e-32	3.5197e-34	6.33739e-19	8.85239e-19	0.228893	0.00464528	0.382	0.2615	1.81604e-14	2.53674e-14	Congruent	UU
ENSMUSG00000026234	Ncl	2.34596e-05	1.27797e-05	0.0821631	0.0014291	0.172	0.123	0.582643	0.317397	0.0539166	0.0977736	0.0274637	0.0172935	0.178	0.1495	1	0	Congruent	UU
ENSMUSG00000026235	Epha4	1.33003e-07	6.07707e-09	0.130763	0.000626429	0.509	0.4245	0.00330327	0.00015093	0.0955606	0.0925174	0.0334902	0.0228611	0.481	0.4505	1	0	Congruent	UU
ENSMUSG00000026238	Ptma	0.619168	0.0497428	-0.0408577	0.0045219	0.13	0.132	1	0	0.52238	0.274628	-0.0085713	0.0180008	0.123	0.12475	1	0	Congruent	DD
ENSMUSG00000026249	Serpine2	3.10962e-08	2.57712e-08	0.134491	0.00810282	0.286	0.206	0.000772306	0.000640054	0.000119427	0.000151727	0.0793166	0.00743314	0.281	0.228	0.774401	0.451199	Congruent	UU
ENSMUSG00000026259	Ngef	2.70072e-25	3.77787e-26	0.277466	0.00272609	0.419	0.26	6.70752e-21	9.38271e-22	1.24322e-08	2.48016e-08	0.15205	0.0268711	0.399	0.30325	0.000356256	0.000710716	Congruent	UU
ENSMUSG00000026260	Ndufa10	0.029187	0.0160544	0.0331204	0.000966957	0.137	0.112	1	0	0.0758043	0.0885489	0.0254984	0.00982626	0.146	0.1245	1	0	Congruent	UU
ENSMUSG00000026275	Ppp1r7	2.22817e-09	6.92469e-10	0.108306	0.000474815	0.206	0.132	5.53389e-05	1.71982e-05	0.000664361	0.000579998	0.0525242	0.00339403	0.196	0.15625	1	0	Congruent	UU
ENSMUSG00000026277	Stk25	0.105186	0.0307455	0.0172224	0.00240202	0.138	0.119	1	0	0.000598742	0.000717604	0.0445203	0.00533161	0.157	0.121	1	0	Congruent	UU
ENSMUSG00000026289	Atg16l1	0.420436	0.0567963	0.00507627	0.000423031	0.24	0.2265	1	0	0.000137626	0.000266773	0.0792247	0.0128963	0.279	0.22375	0.341301	0.44702	Congruent	UU
ENSMUSG00000026305	Lrrfip1	0.276109	0.0298505	0.00329488	0.000424086	0.227	0.21	1	0	0.615896	0.315215	0.00232881	0.0122076	0.267	0.25725	1	0	Congruent	UU
ENSMUSG00000026309	Ilkap	0.0102283	0.00314704	0.0285352	0.000491042	0.119	0.092	1	0	0.0028378	0.00262306	0.0434121	0.00666444	0.123	0.0945	1	0	Congruent	UU
ENSMUSG00000026312	Cdh7	2.1863e-10	3.28714e-11	0.132918	0.0129516	0.25	0.1645	5.42989e-06	8.16393e-07	1.65909e-06	2.87867e-06	0.108288	0.0131841	0.239	0.179	0.0475428	0.0824913	Congruent	UU
ENSMUSG00000026313	Hdac4	0.583831	0.300014	-0.0101412	0.0109512	0.203	0.193	1	0	0.575313	0.286731	-0.023898	0.0117403	0.238	0.2435	1	0	Congruent	DD
ENSMUSG00000026319	Relch	0.119163	0.0259828	-0.0516969	0.00363288	0.526	0.5545	1	0	0.106337	0.0747378	-0.0541124	0.0190014	0.597	0.62	1	0	Congruent	DD
ENSMUSG00000026333	Gin1	0.00318328	0.00127849	0.0415876	0.00150426	0.105	0.077	1	0	0.13397	0.164869	0.0292456	0.0113841	0.101	0.085	1	0	Congruent	UU
ENSMUSG00000026335	Pam	0.127116	0.0759688	-0.128675	0.012438	0.536	0.572	1	0	0.592582	0.277305	-0.0376887	0.014761	0.67	0.68425	1	0	Congruent	DD
ENSMUSG00000026341	Actr3	0.000215533	0.000181819	0.0454812	0.00389449	0.247	0.1905	1	0	0.485646	0.359694	0.00442876	0.0152648	0.253	0.239	1	0	Congruent	UU
ENSMUSG00000026360	Rgs2	5.67412e-14	5.32188e-14	0.146275	0.00146117	0.176	0.092	1.40922e-09	1.32174e-09	7.97032e-05	8.15947e-05	0.100851	0.0159017	0.164	0.12	0.750006	0.499988	Congruent	UU
ENSMUSG00000026361	Cdc73	0.24164	0.013322	-0.0831722	0.00311018	0.245	0.2525	1	0	0.54058	0.245308	-0.0290523	0.00727914	0.291	0.27675	1	0	Congruent	DD
ENSMUSG00000026374	Tsn	0.0829331	0.00258785	0.0207302	0.00242026	0.121	0.102	1	0	0.227813	0.187465	0.0233743	0.0121255	0.131	0.11725	1	0	Congruent	UU
ENSMUSG00000026384	Ptpn4	0.425954	0.0275459	-0.0110894	0.00159422	0.426	0.399	1	0	5.81186e-06	6.92662e-06	-0.115135	0.0181916	0.499	0.566	0.166545	0.198489	Congruent	DD
ENSMUSG00000026425	Srgap2	2.88755e-08	4.75116e-09	-0.27828	0.00764707	0.481	0.558	0.000717153	0.000118	1.92611e-05	2.94752e-05	-0.133722	0.00952142	0.581	0.634	0.347642	0.437091	Congruent	DD
ENSMUSG00000026434	Nucks1	0.00100164	0.00030838	0.0550479	0.00243412	0.138	0.1025	1	0	0.282153	0.266136	0.0186944	0.0166679	0.15	0.13675	1	0	Congruent	UU
ENSMUSG00000026442	Nfasc	6.27004e-06	5.05597e-06	-0.21546	0.00483021	0.474	0.5315	0.155723	0.12557	7.52446e-05	0.000102932	-0.141012	0.0221922	0.548	0.6065	0.522138	0.552455	Congruent	DD
ENSMUSG00000026443	Lrrn2	2.5636e-13	1.69464e-13	0.153039	0.00228782	0.256	0.161	6.36696e-09	4.2088e-09	3.17734e-06	6.25165e-06	0.0969467	0.0143366	0.241	0.179	0.0910498	0.179147	Congruent	UU
ENSMUSG00000026447	Pik3c2b	0.0914499	0.0143946	-0.159759	0.00583625	0.275	0.2845	1	0	0.355313	0.274356	-0.0232191	0.0119079	0.292	0.27125	1	0	Congruent	DD
ENSMUSG00000026455	Klhl12	0.0131286	0.0107452	-0.0581596	0.0066397	0.096	0.1215	1	0	0.867217	0.030613	-0.00821858	0.00125868	0.111	0.109	1	0	Congruent	DD
ENSMUSG00000026458	Ppfia4	0.00030437	7.66772e-05	0.0756546	0.000955187	0.174	0.1325	1	0	7.61932e-05	0.000121888	0.0660451	0.0136815	0.164	0.11775	0.51798	0.557347	Congruent	UU
ENSMUSG00000026469	Xpr1	1.24216e-07	1.4574e-07	0.150502	0.00661953	0.385	0.3055	0.00308502	0.00361961	0.00437157	0.00426267	0.0755787	0.0113562	0.387	0.344	1	0	Congruent	UU
ENSMUSG00000026470	Stx6	0.261984	0.0459293	-0.00448213	0.00271314	0.169	0.154	1	0	0.358434	0.272473	-0.038735	0.0120874	0.164	0.17025	1	0	Congruent	DD
ENSMUSG00000026473	Glul	7.12524e-07	3.42053e-07	-0.148099	0.000873033	0.078	0.125	0.0176962	0.00849524	0.115765	0.0626674	-0.0383356	0.0124817	0.089	0.10225	1	0	Congruent	DD
ENSMUSG00000026482	Rgl1	3.96145e-08	3.55875e-08	0.12327	0.00480067	0.266	0.19	0.000983865	0.000883852	0.001525	0.00302329	0.084054	0.0178973	0.297	0.24425	0.537152	0.408132	Congruent	UU
ENSMUSG00000026490	Cdc42bpa	2.00662e-07	4.59662e-08	-0.246913	0.0064683	0.826	0.8875	0.00498365	0.00114162	3.63543e-06	6.39612e-06	-0.185311	0.00893076	0.892	0.909	0.104177	0.183287	Congruent	DD
ENSMUSG00000026491	Ahctf1	0.00241851	0.00156616	0.0303069	0.00526159	0.283	0.2315	1	0	0.0283137	0.0538428	0.0491765	0.0229493	0.306	0.26275	1	0	Congruent	UU
ENSMUSG00000026494	Kif26b	4.28407e-13	5.5443e-13	0.15426	0.00887286	0.23	0.1375	1.06399e-08	1.37698e-08	0.0129354	0.0141637	0.0510156	0.0187883	0.208	0.175	1	0	Congruent	UU
ENSMUSG00000026496	Parp1	0.00314456	0.0012524	0.0439011	0.00100063	0.108	0.0795	1	0	0.00225992	0.00051309	0.0404284	0.00131058	0.104	0.0785	1	0	Congruent	UU
ENSMUSG00000026502	Desi2	0.00948156	0.00664866	0.0504406	0.00631179	0.3	0.257	1	0	0.00155593	0.00226872	0.0675501	0.0092061	0.34	0.29125	1	0	Congruent	UU
ENSMUSG00000026516	Nvl	0.0853561	0.0560255	0.0176851	0.00486941	0.273	0.2445	1	0	8.61605e-11	9.81433e-11	0.145252	0.00709638	0.324	0.2375	2.46901e-06	2.81239e-06	Congruent	UU
ENSMUSG00000026527	Rgs7	0.056677	0.034277	0.0389435	0.00206753	0.831	0.8875	1	0	0.0853496	0.0564723	0.0187164	0.0068716	0.9	0.91175	1	0	Congruent	UU
ENSMUSG00000026554	Dcaf8	0.320639	0.0095389	-0.0576399	0.00340047	0.184	0.192	1	0	0.21001	0.119341	-0.00382092	0.0106501	0.212	0.19175	1	0	Congruent	DD
ENSMUSG00000026565	Pou2f1	0.015215	0.00795671	0.046223	0.000379587	0.317	0.277	1	0	0.000743839	0.00077574	0.0657739	0.0123773	0.365	0.3115	1	0	Congruent	UU
ENSMUSG00000026566	Mpzl1	0.000198618	9.41307e-05	-0.0992129	0.00045654	0.088	0.124	1	0	0.827076	0.166569	-0.0193198	0.00908288	0.119	0.1195	1	0	Congruent	DD
ENSMUSG00000026571	Dcaf6	0.305879	0.146079	-0.0362225	0.00941583	0.504	0.531	1	0	0.280131	0.216647	-0.0153975	0.0272817	0.598	0.618	1	0	Congruent	DD
ENSMUSG00000026575	Nme7	1.98996e-13	2.68732e-13	0.163474	0.00975828	0.342	0.23	4.94227e-09	6.67422e-09	2.04082e-12	3.57859e-12	0.17747	0.00321001	0.341	0.2485	5.84817e-08	1.02548e-07	Congruent	UU
ENSMUSG00000026576	Atp1b1	1.13333e-19	1.58565e-19	0.281654	0.01124	0.782	0.7445	2.81475e-15	3.93811e-15	1.02783e-09	1.92299e-09	0.173039	0.0126788	0.754	0.7215	2.94535e-05	5.51051e-05	Congruent	UU
ENSMUSG00000026585	Kifap3	0.015604	0.0116386	0.0862157	0.00718715	0.605	0.593	1	0	0.0148471	0.0134545	0.0576328	0.00572096	0.705	0.7015	1	0	Congruent	UU
ENSMUSG00000026587	Astn1	0.0545855	0.0335931	0.0822978	0.00656216	0.649	0.673	1	0	0.601603	0.307867	0.020108	0.0116895	0.738	0.75775	1	0	Congruent	UU
ENSMUSG00000026594	Ralgps2	0.00112573	4.43933e-05	0.0518854	0.00128078	0.257	0.209	1	0	0.0477252	0.0255857	0.0239698	0.00344053	0.278	0.24975	1	0	Congruent	UU
ENSMUSG00000026596	Abl2	0.00109626	0.000196386	0.0536094	0.00599863	0.345	0.2895	1	0	0.000407783	0.000329538	0.0760597	0.0030139	0.397	0.3405	0.940896	0.118207	Congruent	UU
ENSMUSG00000026608	Kctd3	4.23751e-09	5.87674e-09	-0.237479	0.0169825	0.108	0.172	0.000105243	0.000145955	0.000315061	0.000502845	-0.126586	0.0128595	0.132	0.16875	0.958148	0.0837044	Congruent	DD
ENSMUSG00000026610	Esrrg	0.0741229	0.0721663	-0.0147972	0.0145466	0.421	0.371	1	0	0.463876	0.210182	-0.0424094	0.00899874	0.454	0.46675	1	0	Congruent	DD
ENSMUSG00000026620	Mark1	1.97855e-07	1.66163e-08	0.129492	0.000739768	0.399	0.3155	0.00491393	0.000412681	0.0396809	0.0263399	0.0410127	0.00746425	0.398	0.36425	1	0	Congruent	UU
ENSMUSG00000026623	Lpgat1	0.841756	0.015081	-0.153091	0.00666562	0.371	0.3495	1	0	0.0351492	0.0371848	-0.1223	0.0200803	0.422	0.437	1	0	Congruent	DD
ENSMUSG00000026626	Ppp2r5a	0.693545	0.171789	-0.0361916	0.00659433	0.161	0.163	1	0	0.55059	0.287037	-0.0225791	0.011937	0.186	0.17975	1	0	Congruent	DD
ENSMUSG00000026634	Angel2	0.0946025	0.0150733	0.0136337	0.00225246	0.184	0.1615	1	0	0.00211685	0.00237429	0.0539796	0.0157087	0.226	0.18325	0.76414	0.47172	Congruent	UU
ENSMUSG00000026640	Plxna2	3.1679e-09	7.71339e-10	0.109119	0.00593681	0.347	0.25	7.86779e-05	1.9157e-05	0.000751125	0.00123638	0.0797181	0.0119803	0.419	0.367	0.79294	0.414121	Congruent	UU
ENSMUSG00000026643	Nmt2	2.34168e-05	1.67981e-05	0.101057	0.000787448	0.327	0.2645	0.581579	0.417197	0.00142596	0.00231936	0.065808	0.0208749	0.362	0.3045	0.758095	0.48381	Congruent	UU
ENSMUSG00000026657	Frmd4a	1.09165e-05	1.44281e-05	-0.135159	0.018823	0.739	0.8505	0.271121	0.358337	0.315696	0.086832	-0.0318921	0.0241414	0.814	0.8625	1	0	Congruent	DD
ENSMUSG00000026663	Atf6	2.97387e-07	3.53752e-08	0.121363	0.00105952	0.4	0.3145	0.00738591	0.000878579	0.00102694	0.000916956	0.0764609	0.0213953	0.412	0.35825	0.76607	0.467859	Congruent	UU
ENSMUSG00000026696	Vamp4	0.12871	0.073011	0.0148747	0.00422808	0.152	0.1335	1	0	0.000124033	9.07319e-05	0.0503761	0.00622711	0.174	0.13225	1	0	Congruent	UU
ENSMUSG00000026707	Nsun6	0.360261	0.198304	0.00699349	0.00707287	0.138	0.126	1	0	0.00955187	0.0144902	0.0352889	0.0116531	0.155	0.125	1	0	Congruent	UU
ENSMUSG00000026718	Stam	0.267388	0.00681507	0.00753587	0.0035607	0.183	0.168	1	0	0.182486	0.175107	0.0116611	0.0175224	0.209	0.189	1	0	Congruent	UU
ENSMUSG00000026727	Rsu1	0.50062	0.0636028	-0.0353899	0.00235435	0.114	0.1195	1	0	0.472356	0.207467	-0.0476098	0.00776831	0.134	0.138	1	0	Congruent	DD
ENSMUSG00000026737	Pip4k2a	1.16693e-15	1.54139e-15	-0.391524	0.00674373	0.212	0.313	2.89819e-11	3.8282e-11	7.88887e-11	1.54344e-10	-0.293288	0.0321794	0.254	0.335	2.26064e-06	4.4229e-06	Congruent	DD
ENSMUSG00000026743	Mllt10	0.872832	0.0829738	-0.00760205	0.00357526	0.802	0.86	1	0	0.343355	0.17985	-0.0477986	0.00801697	0.83	0.84575	1	0	Congruent	DD
ENSMUSG00000026748	Plxdc2	1.85894e-18	2.57286e-18	-0.648124	0.00418799	0.302	0.412	4.61685e-14	6.38997e-14	4.86634e-19	9.71902e-19	-0.456594	0.0314681	0.349	0.4625	1.3945e-14	2.78508e-14	Congruent	DD
ENSMUSG00000026750	Psmb7	0.00492069	0.00177306	0.0376044	0.000476812	0.154	0.121	1	0	0.0140747	0.00999205	0.0302273	0.00503771	0.142	0.11675	1	0	Congruent	UU
ENSMUSG00000026761	Orc4	0.0219868	0.0136547	0.041862	0.00495365	0.513	0.474	1	0	0.0238976	0.0165032	0.0571199	0.00608401	0.621	0.60525	1	0	Congruent	UU
ENSMUSG00000026764	Kif5c	2.09892e-13	6.09002e-14	0.170699	0	0.416	0.2975	5.21288e-09	1.51252e-09	0.000504257	0.000552694	0.062726	0.00991795	0.388	0.333	1	0	Congruent	UU
ENSMUSG00000026767	Mindy3	0.611391	0.134146	-0.0122981	0.000468061	0.127	0.1205	1	0	0.651894	0.265729	-0.00728165	0.00785384	0.131	0.1285	1	0	Congruent	DD
ENSMUSG00000026771	Spopl	0.491445	0.202463	-0.0373729	0.00673362	0.203	0.2095	1	0	0.720421	0.112316	-0.0180235	0.0123433	0.224	0.22525	1	0	Congruent	DD
ENSMUSG00000026775	Yme1l1	0.0805163	0.0166523	0.0147587	0.0011443	0.311	0.2785	1	0	3.47175e-05	6.52191e-05	0.0993033	0.010534	0.38	0.3155	0.295805	0.47475	Congruent	UU
ENSMUSG00000026781	Acbd5	0.917982	0.0230747	-0.0280422	0.00698429	0.186	0.184	1	0	0.361683	0.18267	-0.0484374	0.00630796	0.194	0.2015	1	0	Congruent	DD
ENSMUSG00000026782	Abi2	0.0856328	0.0332096	0.071754	0.00250096	0.707	0.743	1	0	0.0359213	0.0640264	0.0656573	0.01905	0.765	0.7605	1	0	Congruent	UU
ENSMUSG00000026784	Pdss1	0.804635	0.120995	0.00681911	0.00230124	0.152	0.1495	1	0	0.0812588	0.0890949	0.0187916	0.0109594	0.187	0.16525	1	0	Congruent	UU
ENSMUSG00000026787	Gad2	4.82739e-10	1.61794e-10	0.1586	0.00583939	0.362	0.27	1.19893e-05	4.01831e-06	8.49358e-06	1.69378e-05	0.13978	0.0194976	0.42	0.34675	0.243392	0.485368	Congruent	UU
ENSMUSG00000026790	Odf2	0.0034584	0.00053344	0.050489	0.00431653	0.37	0.3175	1	0	1.83405e-08	3.47624e-08	0.12673	0.010875	0.392	0.3065	0.000525566	0.000996151	Congruent	UU
ENSMUSG00000026797	Stxbp1	5.9671e-16	6.42315e-16	0.196328	0.00041715	0.342	0.2225	1.48199e-11	1.59525e-11	4.89288e-05	6.22966e-05	0.0976662	0.0105602	0.326	0.27025	0.530884	0.542395	Congruent	UU
ENSMUSG00000026812	Tsc1	0.0205344	0.0128285	0.015343	0.00484628	0.273	0.234	1	0	8.97721e-05	0.000103603	0.0719581	0.00982507	0.29	0.23625	0.828155	0.3141	Congruent	UU
ENSMUSG00000026819	Slc25a25	1.71756e-09	2.12197e-09	0.143567	0.00472288	0.204	0.1305	4.26572e-05	5.27013e-05	0.00497727	0.00568309	0.0597301	0.00497374	0.164	0.13425	1	0	Congruent	UU
ENSMUSG00000026821	Ralgds	0.00121396	0.000559355	0.0530924	0.00345392	0.121	0.088	1	0	0.000467266	0.000316742	0.0427963	0.00485418	0.117	0.0845	0.956533	0.0869336	Congruent	UU
ENSMUSG00000026824	Kcnj3	0.00556593	0.00289525	-0.0698991	0.00515136	0.246	0.2885	1	0	0.00375393	0.00335605	-0.033934	0.0141969	0.424	0.48275	1	0	Congruent	DD
ENSMUSG00000026825	Dnm1	1.31641e-06	5.10562e-08	0.118086	0.00085726	0.284	0.218	0.0326943	0.00126803	4.90996e-10	9.774e-10	0.140414	0.0116747	0.322	0.23475	1.407e-05	2.80084e-05	Congruent	UU
ENSMUSG00000026834	Acvr1c	7.64565e-09	4.07698e-09	0.125753	0.00373507	0.202	0.132	0.000189887	0.000101256	0.0369352	0.0326336	0.0431435	0.00954489	0.176	0.15275	1	0	Congruent	UU
ENSMUSG00000026839	Upp2	0.000446491	0.000104629	0.0634082	0.000757623	0.338	0.281	1	0	0.139733	0.0828809	0.0243159	0.0169808	0.353	0.3265	1	0	Congruent	UU
ENSMUSG00000026842	Abl1	0.563016	0.0961897	-0.028867	0.00602108	0.189	0.177	1	0	0.766447	0.0836792	-0.035478	0.00585523	0.198	0.19825	1	0	Congruent	DD
ENSMUSG00000026843	Fubp3	0.58461	0.271228	0.00260061	0.00733587	0.158	0.151	1	0	7.66739e-05	0.000111528	0.0669822	0.00479001	0.195	0.15	0.701537	0.275858	Congruent	UU
ENSMUSG00000026858	Miga2	0.398013	0.104399	0.010833	0.000496056	0.101	0.093	1	0	0.143551	0.0998155	0.0179435	0.00668179	0.114	0.0995	1	0	Congruent	UU
ENSMUSG00000026860	Sh3glb2	0.000129538	9.94115e-05	0.0599091	0.00334551	0.169	0.1225	1	0	2.9055e-07	5.20582e-07	0.0902472	0.0205564	0.176	0.11525	0.00832599	0.0149178	Congruent	UU
ENSMUSG00000026864	Hspa5	6.90891e-11	9.53238e-11	0.129088	0.0138856	0.274	0.1785	1.7159e-06	2.36746e-06	6.45872e-12	1.16185e-11	0.137887	0.0107511	0.26	0.1735	1.85081e-07	3.32939e-07	Congruent	UU
ENSMUSG00000026867	Gapvd1	0.12326	0.0670145	-0.00917306	0.00332594	0.32	0.2865	1	0	0.615283	0.207923	-0.0181853	0.00262462	0.334	0.31975	1	0	Congruent	DD
ENSMUSG00000026872	Zeb2	9.80343e-76	1.26575e-75	-0.935604	0.00877362	0.219	0.503	2.43478e-71	3.14363e-71	1.44511e-37	2.88742e-37	-0.61014	0.033188	0.302	0.48575	4.1411e-33	8.27418e-33	Congruent	DD
ENSMUSG00000026878	Rab14	1.43275e-08	1.40406e-08	0.115535	0.00895222	0.318	0.231	0.000355838	0.000348711	0.0741033	0.0959453	0.0395211	0.0264211	0.311	0.278	1	0	Congruent	UU
ENSMUSG00000026883	Dab2ip	4.61632e-07	2.33146e-07	0.0907573	0.000966957	0.166	0.109	0.0114651	0.00579042	0.569249	0.373921	0.0131363	0.0134535	0.126	0.12025	1	0	Congruent	UU
ENSMUSG00000026885	Ttll11	0.00404285	0.00103672	0.060469	0	0.282	0.24	1	0	0.0119331	0.00952938	0.0258161	0.00618884	0.321	0.2795	1	0	Congruent	UU
ENSMUSG00000026888	Grb14	4.42604e-12	1.37738e-12	-0.317764	0.00471352	0.155	0.2355	1.09925e-07	3.42087e-08	6.21254e-07	1.20131e-06	-0.213058	0.0370711	0.185	0.25125	0.0178026	0.0344248	Congruent	DD
ENSMUSG00000026904	Slc4a10	0.87107	0.0314111	0.017009	0.00023492	0.716	0.7855	1	0	0.175711	0.143424	0.0556612	0.0157016	0.788	0.80575	1	0	Congruent	UU
ENSMUSG00000026915	Strbp	1.04359e-06	6.16891e-07	0.123649	0.00447641	0.917	0.9425	0.0259187	0.0153211	0.24466	0.211201	0.0310968	0.00969634	0.927	0.94825	1	0	Congruent	UU
ENSMUSG00000026924	Sec16a	0.202109	0.000242218	0.00990143	0.000484512	0.122	0.108	1	0	0.00650208	0.00726062	0.0426567	0.0103699	0.135	0.106	1	0	Congruent	UU
ENSMUSG00000026927	Entr1	0.00240486	0.00153428	0.0389356	0.00472944	0.159	0.1225	1	0	0.00226528	0.00140695	0.0535865	0.00784381	0.179	0.1465	1	0	Congruent	UU
ENSMUSG00000026933	Camsap1	1.52068e-05	1.14877e-05	0.0644079	0.00532248	0.23	0.17	0.377677	0.28531	2.05078e-05	2.53125e-05	0.0673051	0.0118655	0.234	0.17975	0.445211	0.483943	Congruent	UU
ENSMUSG00000026959	Grin1	1.40167e-06	1.64559e-06	0.142685	0.00986921	0.814	0.8345	0.0348119	0.0408699	6.94854e-16	9.48722e-16	0.225482	0.00718696	0.814	0.78775	1.99117e-11	2.71866e-11	Congruent	UU
ENSMUSG00000026970	Rbms1	4.28985e-16	4.7207e-17	0.211097	0.00415016	0.478	0.3435	1.06543e-11	1.17243e-12	0.0186772	0.0215902	0.0415363	0.0210173	0.456	0.40375	1	0	Congruent	UU
ENSMUSG00000026987	Baz2b	3.94673e-16	5.08179e-16	-0.362331	0.00686265	0.536	0.6395	9.80209e-12	1.26211e-11	5.21838e-10	1.04021e-09	-0.252756	0.0273553	0.61	0.6895	1.49538e-05	2.98082e-05	Congruent	DD
ENSMUSG00000026991	Pkp4	1.80997e-07	6.07353e-08	-0.23961	0.00504396	0.453	0.5215	0.00449524	0.00150842	3.25009e-12	5.72829e-12	-0.228087	0.021068	0.574	0.65575	9.31344e-08	1.6415e-07	Congruent	DD
ENSMUSG00000026999	Nup35	0.00279135	0.00110987	0.0558705	0.00518197	0.156	0.1205	1	0	0.0197537	0.0308208	0.0515179	0.0154487	0.161	0.13325	1	0	Congruent	UU
ENSMUSG00000027006	Dnajc10	0.0135987	0.0104169	0.0290621	0.00592973	0.182	0.149	1	0	0.00177289	0.00227521	0.0512859	0.011216	0.23	0.18925	0.980736	0.0385283	Congruent	UU
ENSMUSG00000027011	Ube2e3	0.0475693	0.00578597	0.0141335	0.00384556	0.217	0.186	1	0	0.0832322	0.0988985	0.0354157	0.0239031	0.248	0.21725	1	0	Congruent	UU
ENSMUSG00000027012	Dync1i2	0.560111	0.0543551	0.0385224	0.00277315	0.696	0.739	1	0	0.000199472	0.000243955	0.0984063	0.0097266	0.775	0.767	0.8852	0.2296	Congruent	UU
ENSMUSG00000027014	Cwc22	0.217203	0.0160381	0.0163134	0.00142048	0.145	0.131	1	0	0.0298364	0.0221033	0.0247802	0.0103186	0.191	0.164	1	0	Congruent	UU
ENSMUSG00000027016	Zfp385b	7.48971e-21	4.07684e-21	0.259623	0.00233246	0.878	0.8635	1.86015e-16	1.01252e-16	0.249847	0.205476	0.0151174	0.0216502	0.892	0.9195	1	0	Congruent	UU
ENSMUSG00000027030	Stk39	0.113133	0.0393535	-0.114012	0.00949301	0.283	0.2945	1	0	0.0191915	0.0222959	-0.0992513	0.0218482	0.299	0.3265	1	0	Congruent	DD
ENSMUSG00000027035	Cers6	0.0193805	0.00379326	0.0357326	0.00663825	0.291	0.2555	1	0	0.53717	0.401498	0.0100976	0.0231484	0.416	0.40575	1	0	Congruent	UU
ENSMUSG00000027091	Zc3h15	0.00782789	0.00968756	0.0441596	0.0109617	0.157	0.1235	1	0	0.0172011	0.0162796	0.0350024	0.00716005	0.171	0.14425	1	0	Congruent	UU
ENSMUSG00000027104	Atf2	0.000143252	6.32879e-05	0.0908797	0.00388255	0.491	0.4275	1	0	0.476421	0.333601	0.0338159	0.0151398	0.561	0.56125	1	0	Congruent	UU
ENSMUSG00000027109	Sp3	0.0296164	0.00179259	0.0340875	0.00134258	0.19	0.1615	1	0	0.0183945	0.0212675	0.0492835	0.0209216	0.227	0.18875	1	0	Congruent	UU
ENSMUSG00000027131	Emc4	0.00257514	0.00160535	0.0487743	0.00192207	0.149	0.1145	1	0	0.0263793	0.0232326	0.0391663	0.00865048	0.131	0.1085	1	0	Congruent	UU
ENSMUSG00000027134	Lpcat4	4.3553e-11	4.23373e-11	0.113511	0.00195336	0.186	0.1085	1.08168e-06	1.05149e-06	6.69102e-20	1.29863e-19	0.132789	0.00428901	0.164	0.07525	1.91738e-15	3.72135e-15	Congruent	UU
ENSMUSG00000027166	Dnajc24	0.188777	0.0624759	-0.0407228	0.00318013	0.138	0.1515	1	0	0.684449	0.318964	-0.0189263	0.00807918	0.155	0.15125	1	0	Congruent	DD
ENSMUSG00000027167	Elp4	0.467948	0.245621	-0.0196138	0.0123946	0.251	0.2355	1	0	0.641102	0.203707	-0.0347245	0.0159024	0.3	0.29	1	0	Congruent	DD
ENSMUSG00000027175	Tcp11l1	0.14348	0.0649815	-0.0512483	0.00505362	0.117	0.132	1	0	0.531162	0.352009	-0.016572	0.0103211	0.127	0.13325	1	0	Congruent	DD
ENSMUSG00000027176	Cstf3	4.40991e-08	3.88267e-08	0.124777	0.00213493	0.419	0.3265	0.00109525	0.000964301	0.00125507	0.00155571	0.068432	0.00739048	0.421	0.3685	1	0	Congruent	UU
ENSMUSG00000027177	Hipk3	0.0307564	0.00141967	0.0439927	0.000435678	0.216	0.1865	1	0	0.399742	0.0964098	0.00328035	0.019635	0.204	0.1965	1	0	Congruent	UU
ENSMUSG00000027180	Fbxo3	4.74394e-05	3.01725e-05	0.0778877	0.00221914	0.233	0.1785	0.824163	0.248672	0.00892394	0.00764956	0.0666973	0.016573	0.264	0.22975	1	0	Congruent	UU
ENSMUSG00000027184	Caprin1	8.93729e-05	0.0001037	0.0635247	0.0115229	0.354	0.285	0.699255	0.425318	0.000636462	0.000715387	0.0765981	0.0164694	0.366	0.311	0.781742	0.328335	Congruent	UU
ENSMUSG00000027189	Trim44	0.796304	0.00812098	-0.0311592	0.0031706	0.262	0.2525	1	0	0.36325	0.179913	-0.0507602	0.0102366	0.29	0.296	1	0	Congruent	DD
ENSMUSG00000027194	Ttc17	0.103857	0.030033	0.0126607	0.00292723	0.249	0.2225	1	0	0.103983	0.143559	0.0195837	0.00625967	0.3	0.27075	1	0	Congruent	UU
ENSMUSG00000027198	Ext2	0.0115422	0.00362206	0.0469171	0.00284955	0.156	0.127	1	0	0.487515	0.0777382	0.00339619	0.00714455	0.165	0.15675	1	0	Congruent	UU
ENSMUSG00000027199	Gatm	2.86665e-25	3.9847e-25	-0.388135	0.00896377	0.086	0.206	7.11961e-21	9.89641e-21	2.69592e-15	5.25531e-15	-0.243896	0.020774	0.102	0.188	7.72543e-11	1.50596e-10	Congruent	DD
ENSMUSG00000027206	Cops2	0.0654653	0.0299976	0.0205265	0.00143783	0.137	0.1155	1	0	0.215304	0.114404	0.0054265	0.00300573	0.141	0.12725	1	0	Congruent	UU
ENSMUSG00000027210	Meis2	1.39031e-22	9.73172e-23	0.248008	0.00402532	0.871	0.831	3.45298e-18	2.41697e-18	7.67228e-12	1.47106e-11	0.208441	0.0242946	0.882	0.859	2.19857e-07	4.21546e-07	Congruent	UU
ENSMUSG00000027221	Chst1	9.95461e-13	2.52352e-13	0.146306	0.000478602	0.209	0.1225	2.47233e-08	6.26742e-09	1.08322e-11	1.85405e-11	0.10917	0.00265674	0.177	0.10725	3.10409e-07	5.31296e-07	Congruent	UU
ENSMUSG00000027238	Frmd5	2.50922e-31	1.88102e-32	-0.718007	0.00808209	0.757	0.8305	6.23189e-27	4.6717e-28	2.18535e-20	4.36153e-20	-0.416739	0.021785	0.776	0.8405	6.26233e-16	1.24984e-15	Congruent	DD
ENSMUSG00000027244	Atg13	0.602206	0.0949119	0.00264487	0.00280644	0.143	0.136	1	0	0.189007	0.189702	0.0160651	0.010634	0.16	0.1445	1	0	Congruent	UU
ENSMUSG00000027248	Pdia3	0.0148411	0.00435343	0.0102614	0.00485256	0.192	0.157	1	0	0.00729875	0.00452478	0.0287864	0.0114237	0.191	0.15775	1	0	Congruent	UU
ENSMUSG00000027254	Map1a	1.60226e-06	3.76695e-07	0.0712235	0.0033932	0.162	0.1075	0.0397938	0.0093556	0.00145806	0.00206503	0.0462285	0.00662834	0.145	0.11175	1	0	Congruent	UU
ENSMUSG00000027270	Lamp5	7.33614e-06	1.46281e-07	0.0879071	0	0.161	0.111	0.1822	0.00363304	0.000682126	0.000855042	0.0679845	0.00650645	0.154	0.119	0.944154	0.111692	Congruent	UU
ENSMUSG00000027273	Snap25	0.386179	0.0358127	0.0410756	0.00110345	0.787	0.8545	1	0	1.00213e-06	1.46213e-06	0.119517	0.0178558	0.885	0.88625	0.0287171	0.0418989	Congruent	UU
ENSMUSG00000027288	Zfp106	0.0280719	0.0237463	0.030648	0.00438017	0.221	0.1895	1	0	0.105961	0.0595453	0.0203221	0.00549108	0.227	0.20575	1	0	Congruent	UU
ENSMUSG00000027291	Vps39	0.163541	0.0862481	0.00615921	0.00484628	0.122	0.106	1	0	0.114781	0.143427	0.0197824	0.0133363	0.128	0.1105	1	0	Congruent	UU
ENSMUSG00000027296	Itpka	1.02584e-11	1.39975e-11	0.159747	0.00679944	0.256	0.163	2.54778e-07	3.47641e-07	4.5077e-06	8.99181e-06	0.107009	0.0189847	0.232	0.16825	0.129173	0.257669	Congruent	UU
ENSMUSG00000027298	Tyro3	0.0007725	0.000641692	0.0467538	0	0.199	0.1535	1	0	6.41841e-06	1.14655e-05	0.0724085	0.0121924	0.197	0.143	0.183926	0.328555	Congruent	UU
ENSMUSG00000027303	Ptpra	0.285515	0.11661	-0.077716	0.0050271	0.285	0.292	1	0	0.309485	0.40945	-0.0918794	0.0238466	0.313	0.32025	1	0	Congruent	DD
ENSMUSG00000027304	Rtf1	0.00257815	0.000745912	0.0511571	0.00138952	0.174	0.137	1	0	0.00987187	0.0123811	0.0338352	0.00534689	0.18	0.14975	1	0	Congruent	UU
ENSMUSG00000027309	Dnaaf9	3.7022e-09	2.08459e-09	-0.197948	0.00233977	0.604	0.696	9.19477e-05	5.17728e-05	0.0256177	0.0234494	-0.053131	0.017807	0.691	0.73075	1	0	Congruent	DD
ENSMUSG00000027312	Atrn	0.1457	0.0120964	-0.108242	0.00309394	0.32	0.328	1	0	0.535302	0.435245	-0.0292058	0.016497	0.376	0.35775	1	0	Congruent	DD
ENSMUSG00000027340	Slc23a2	0.177305	0.021147	0.0103632	0.000420243	0.239	0.2175	1	0	0.113119	0.159338	0.0234588	0.022213	0.254	0.22875	1	0	Congruent	UU
ENSMUSG00000027347	Rasgrp1	4.67077e-11	5.24527e-11	0.166955	0.00602108	0.291	0.201	1.16003e-06	1.30272e-06	2.73094e-10	4.16857e-10	0.153757	0.0147953	0.34	0.2535	7.82577e-06	1.19455e-05	Congruent	UU
ENSMUSG00000027350	Chgb	6.6252e-23	4.44558e-24	0.203408	0.00293284	0.219	0.101	1.64544e-18	1.10411e-19	0.00127108	0.00210984	0.0551761	0.00763892	0.167	0.13025	1	0	Congruent	UU
ENSMUSG00000027361	Gabpb1	0.37085	0.128383	0.00402489	0.00379764	0.137	0.126	1	0	0.0106634	0.00944719	0.0343107	0.0073556	0.155	0.1275	1	0	Congruent	UU
ENSMUSG00000027364	Usp50	0.00621261	0.000168034	0.0489307	0.000890952	0.198	0.1625	1	0	0.00238611	0.00268182	0.0749544	0.0170208	0.224	0.1835	0.806662	0.386676	Congruent	UU
ENSMUSG00000027366	Sppl2a	0.0283068	0.0126997	0.0269769	0.00753183	0.248	0.2155	1	0	0.389344	0.268421	0.00863639	0.0134786	0.254	0.23925	1	0	Congruent	UU
ENSMUSG00000027367	Stard7	0.202396	0.0290573	0.00978881	0.00430944	0.127	0.1125	1	0	0.115021	0.153969	0.0288765	0.00990518	0.143	0.125	1	0	Congruent	UU
ENSMUSG00000027375	Mal	1.28482e-26	1.68176e-26	-0.389014	0.0127431	0.089	0.219	3.19098e-22	4.17681e-22	2.55984e-22	5.11359e-22	-0.346715	0.0136581	0.11	0.22375	7.33548e-18	1.46535e-17	Congruent	DD
ENSMUSG00000027384	Ndufaf5	0.304912	0.0227542	0.0141613	0.00191666	0.134	0.1225	1	0	0.117912	0.0738114	0.0107193	0.0077568	0.157	0.13925	1	0	Congruent	UU
ENSMUSG00000027397	Slc20a1	0.00065407	8.29941e-05	0.0573423	0	0.124	0.0905	1	0	0.0578206	0.0248598	0.0165253	0.00191028	0.125	0.10625	1	0	Congruent	UU
ENSMUSG00000027405	Nop56	0.0147113	0.019888	0.045717	0.0154423	0.149	0.1175	1	0	6.39004e-08	6.79576e-08	0.0873853	0.011083	0.172	0.1135	0.00183113	0.00194739	Congruent	UU
ENSMUSG00000027406	Idh3b	0.00205873	0.000593682	0.0569261	0.00196445	0.306	0.2575	1	0	2.54681e-16	3.50475e-16	0.179503	0.00975807	0.345	0.23625	7.29815e-12	1.00432e-11	Congruent	UU
ENSMUSG00000027419	Pcsk2	2.32216e-33	6.73799e-34	0.363027	0.00307958	0.932	0.9095	5.76731e-29	1.67345e-29	6.22354e-28	1.21069e-27	0.368637	0.0192402	0.929	0.9195	1.78342e-23	3.46936e-23	Congruent	UU
ENSMUSG00000027422	Rrbp1	0.0155597	0.0099091	-0.103702	0.0081732	0.129	0.1525	1	0	0.555731	0.320138	-0.024111	0.0131776	0.117	0.1225	1	0	Congruent	DD
ENSMUSG00000027430	Dtd1	0.030789	0.00114013	0.0392767	0.00175962	0.215	0.186	1	0	0.0206083	0.0305081	0.0331144	0.011106	0.24	0.20675	1	0	Congruent	UU
ENSMUSG00000027433	Xrn2	0.000838052	0.000166381	0.0705772	0.00237887	0.308	0.258	1	0	0.246241	0.405781	0.00238188	0.0255718	0.339	0.309	1	0	Congruent	UU
ENSMUSG00000027438	Napb	0.047916	0.00945976	0.0295308	0	0.156	0.132	1	0	0.000303113	0.000344904	0.062344	0.00892382	0.193	0.15125	0.886628	0.226744	Congruent	UU
ENSMUSG00000027447	Cst3	0.000349015	0.000162821	0.0520953	0.0227781	0.356	0.291	1	0	0.0307571	0.0559555	0.132747	0.0978387	0.314	0.27475	1	0	Congruent	UU
ENSMUSG00000027457	Snph	0.000859928	0.00106766	0.0693891	0.0125612	0.225	0.1775	1	0	0.0129734	0.0231135	0.0580685	0.00902754	0.249	0.21375	1	0	Congruent	UU
ENSMUSG00000027465	Tbc1d20	0.0169956	0.00376093	0.0410702	0.00148528	0.117	0.0935	1	0	0.00848787	0.00525613	0.0393989	0.00264413	0.119	0.09475	1	0	Congruent	UU
ENSMUSG00000027466	Rbck1	0.00146611	0.000592185	0.0635116	0.00147313	0.134	0.101	1	0	9.96834e-05	0.000167966	0.0541515	0.00571721	0.139	0.0995	0.591247	0.414799	Congruent	UU
ENSMUSG00000027475	Kif3b	0.514049	0.0238322	-0.0272964	0.000484052	0.101	0.107	1	0	0.463681	0.234015	-0.0159825	0.00487114	0.107	0.1135	1	0	Congruent	DD
ENSMUSG00000027499	Pkia	0.000976958	5.824e-06	0.0428001	0.00267102	0.341	0.281	1	0	0.0247313	0.0301189	0.035895	0.0205088	0.391	0.3485	1	0	Congruent	UU
ENSMUSG00000027506	Tpd52	0.661687	0.277489	-0.0245401	0.00815391	0.152	0.144	1	0	0.529565	0.245515	-0.0332741	0.0141264	0.138	0.1415	1	0	Congruent	DD
ENSMUSG00000027508	Pag1	0.755386	0.0279814	-0.061975	0.000849408	0.168	0.169	1	0	0.414531	0.335759	-0.0263442	0.00801851	0.18	0.16725	1	0	Congruent	DD
ENSMUSG00000027520	Zdbf2	2.93603e-13	1.86819e-14	0.200084	0.00275094	0.223	0.134	7.29192e-09	4.63984e-10	7.13599e-07	1.27556e-06	0.112174	0.00307892	0.221	0.161	0.0204489	0.0365525	Congruent	UU
ENSMUSG00000027522	Stx16	0.432118	0.0909358	0.00786554	0.000857981	0.204	0.1915	1	0	0.127918	0.0773597	0.0194289	0.00880188	0.221	0.2	1	0	Congruent	UU
ENSMUSG00000027523	Gnas	0.0257793	0.0197258	0.043124	0.0108704	0.186	0.1555	1	0	0.220791	0.0922904	0.0429726	0.00826179	0.181	0.16825	1	0	Congruent	UU
ENSMUSG00000027540	Ptpn1	0.0780073	0.00035034	0.0266874	0.000929089	0.165	0.143	1	0	0.00321423	0.00272052	0.0550101	0.00557299	0.183	0.15025	1	0	Congruent	UU
ENSMUSG00000027544	Nfatc2	0.000709097	9.53768e-05	0.0626989	0.000489863	0.14	0.103	1	0	0.0273014	0.0274839	0.0363575	0.0149653	0.132	0.10625	0.8067	0.386599	Congruent	UU
ENSMUSG00000027546	Atp9a	3.07153e-07	2.53426e-07	0.10763	0.0046939	0.334	0.252	0.00762845	0.00629408	0.000270039	0.000427874	0.0530396	0.0101358	0.316	0.26025	0.857606	0.284787	Congruent	UU
ENSMUSG00000027550	Lrrcc1	0.119028	0.0191442	0.0212448	0.00240202	0.13	0.1125	1	0	0.425766	0.183955	0.0010308	0.0064664	0.144	0.1345	1	0	Congruent	UU
ENSMUSG00000027560	Dok5	0.00178361	0.00160333	0.0510248	0.00603635	0.11	0.0795	1	0	0.399822	0.355359	0.0130761	0.00999947	0.102	0.09425	1	0	Congruent	UU
ENSMUSG00000027562	Car2	2.48238e-11	1.43385e-11	-0.175693	0	0.069	0.1335	6.16523e-07	3.56112e-07	1.16883e-14	1.32969e-14	-0.211357	0.0129233	0.081	0.1525	3.34941e-10	3.81036e-10	Congruent	DD
ENSMUSG00000027575	Arfgap1	0.00620602	0.000519708	0.0404107	0.00319436	0.184	0.1485	1	0	0.00878818	0.0110231	0.0378945	0.0101937	0.179	0.14775	1	0	Congruent	UU
ENSMUSG00000027581	Stmn3	2.76964e-08	3.54638e-08	0.135408	0.0049185	0.246	0.1715	0.000687867	0.000880779	5.6988e-06	1.05754e-05	0.0980534	0.0127258	0.224	0.16575	0.163305	0.303048	Congruent	UU
ENSMUSG00000027598	Itch	0.00346277	0.0026608	-0.153583	0.00673362	0.288	0.3195	1	0	0.450181	0.33272	-0.0657392	0.0252264	0.345	0.34775	1	0	Congruent	DD
ENSMUSG00000027603	Ggt7	0.0214899	0.0204303	0.0420583	0.00327493	0.169	0.1405	1	0	0.000384257	0.00062259	0.0621641	0.00805345	0.181	0.14025	0.821953	0.356095	Congruent	UU
ENSMUSG00000027605	Acss2	0.506197	0.00930833	-0.00358019	0.00229917	0.139	0.13	1	0	0.318623	0.316869	-0.0439447	0.0108707	0.128	0.1375	1	0	Congruent	DD
ENSMUSG00000027618	Nfs1	0.635027	0.0651251	0.0155212	0.00610161	0.142	0.1365	1	0	0.00101025	0.000653342	0.0670481	0.0105233	0.157	0.1235	1	0	Congruent	UU
ENSMUSG00000027624	Epb41l1	8.68741e-18	1.06906e-17	0.236871	0.0068558	0.518	0.385	2.15761e-13	2.65512e-13	2.53756e-08	5.01767e-08	0.161775	0.018158	0.468	0.38275	0.000727162	0.00143786	Congruent	UU
ENSMUSG00000027630	Tbl1xr1	0.896348	0.117297	-0.0675068	0.00995626	0.273	0.264	1	0	0.454351	0.214457	-0.0343165	0.0177204	0.295	0.28025	1	0	Congruent	DD
ENSMUSG00000027634	Ndrg3	0.0176638	0.00474814	0.0510279	0.00597823	0.226	0.1925	1	0	0.0287138	0.0273442	0.0529683	0.0128854	0.252	0.22125	1	0	Congruent	UU
ENSMUSG00000027637	Rab5if	0.0414288	0.0112948	0.0387121	0.00147313	0.117	0.097	1	0	0.00937746	0.018176	0.0440787	0.0128421	0.118	0.08775	0.773281	0.453438	Congruent	UU
ENSMUSG00000027642	Rpn2	0.0881964	0.00880894	0.0162072	0.0018439	0.163	0.1415	1	0	0.051969	0.0589495	0.0402559	0.0142568	0.164	0.13825	1	0	Congruent	UU
ENSMUSG00000027646	Src	0.00661659	0.00575681	0.0470905	0.00350995	0.106	0.08	1	0	1.43998e-05	2.4207e-05	0.0594465	0.00939034	0.103	0.06525	0.300517	0.470905	Congruent	UU
ENSMUSG00000027649	Ctnnbl1	0.913903	0.113982	0.00400193	0	0.137	0.1365	1	0	0.023032	0.0259519	0.0413816	0.0112158	0.156	0.1295	1	0	Congruent	UU
ENSMUSG00000027655	Dhx35	0.0948797	0.00447812	0.0143025	0.00290362	0.127	0.108	1	0	0.0104849	0.00596887	0.0370825	0.00512894	0.127	0.103	1	0	Congruent	UU
ENSMUSG00000027660	Skil	6.66502e-05	6.5525e-05	0.0678717	0.00440032	0.145	0.101	0.752296	0.350306	0.149717	0.147821	0.0173401	0.0120821	0.153	0.1355	1	0	Congruent	UU
ENSMUSG00000027663	Zmat3	0.0498434	0.00682041	0.0296981	0.000487755	0.131	0.1105	1	0	0.455611	0.350337	0.00909815	0.00947141	0.126	0.11775	1	0	Congruent	UU
ENSMUSG00000027665	Pik3ca	0.351096	0.00197529	-0.006046	0.00170663	0.21	0.1945	1	0	0.600899	0.100988	-0.0344636	0.0090356	0.231	0.23175	1	0	Congruent	DD
ENSMUSG00000027668	Mfn1	5.73881e-06	3.60934e-06	-0.148876	0	0.167	0.2215	0.142529	0.0896416	0.477577	0.279642	-0.0510731	0.0139022	0.216	0.22	1	0	Congruent	DD
ENSMUSG00000027669	Gnb4	0.386157	0.154506	0.0106068	0.00533979	0.101	0.092	1	0	0.516233	0.323023	0.0122845	0.00706212	0.106	0.09875	1	0	Congruent	UU
ENSMUSG00000027673	Ndufb5	4.41307e-05	2.64258e-05	0.0525933	0	0.12	0.079	0.815974	0.260252	0.0319601	0.0403498	0.0264856	0.00895854	0.102	0.082	1	0	Congruent	UU
ENSMUSG00000027674	Pex5l	1.42084e-30	1.87183e-30	-0.633157	0.00654069	0.28	0.446	3.5288e-26	4.64887e-26	5.50217e-22	1.09093e-21	-0.403273	0.0244456	0.402	0.5345	1.5767e-17	3.12617e-17	Congruent	DD
ENSMUSG00000027676	Ccdc39	0.0965621	0.0639598	0.0392641	0.00636213	0.124	0.107	1	0	0.00164506	0.00185754	0.0562781	0.00971746	0.136	0.1035	1	0	Congruent	UU
ENSMUSG00000027677	Ttc14	0.122931	0.015745	-0.0366037	0.00095541	0.699	0.764	1	0	0.346727	0.179058	-0.015979	0.0147505	0.756	0.7875	1	0	Congruent	DD
ENSMUSG00000027679	Dnajc19	0.0144145	0.00838394	0.0350418	0.00567797	0.153	0.124	1	0	0.159109	0.129295	0.0130751	0.00972091	0.166	0.149	1	0	Congruent	UU
ENSMUSG00000027680	Fxr1	2.36625e-07	1.3416e-07	0.118445	0.00397575	0.395	0.313	0.00587681	0.003332	0.292397	0.255867	0.0112688	0.0161648	0.408	0.38025	1	0	Congruent	UU
ENSMUSG00000027692	Tnik	5.34964e-08	3.97373e-08	0.121404	0.00370814	0.912	0.9325	0.00132864	0.000986914	0.0130884	0.0072936	0.0595328	0.00775815	0.951	0.9595	1	0	Congruent	UU
ENSMUSG00000027698	Nceh1	5.74311e-05	8.95714e-06	0.0637101	0.00236198	0.176	0.1275	1	0	0.64558	0.284775	0.00241305	0.0132523	0.162	0.156	1	0	Congruent	UU
ENSMUSG00000027722	Spata5	0.941207	0.083146	-0.0393464	0.00454038	0.23	0.222	1	0	0.447193	0.284076	-0.0548709	0.0151221	0.266	0.27	1	0	Congruent	DD
ENSMUSG00000027751	Supt20	0.0107886	0.00988806	0.0191555	0.0150292	0.273	0.231	1	0	0.00080694	0.00140022	0.0786488	0.0159224	0.282	0.23425	0.964386	0.0712281	Congruent	UU
ENSMUSG00000027763	Mbnl1	0.0015003	0.00164167	-0.152143	0.00360633	0.634	0.675	1	0	0.0204464	0.0206683	-0.102425	0.0121552	0.75	0.7675	1	0	Congruent	DD
ENSMUSG00000027770	Dhx36	0.0320897	0.0178626	0.0359651	0.00302937	0.32	0.283	1	0	0.00559008	0.0102789	0.0587126	0.0109087	0.374	0.32375	1	0	Congruent	UU
ENSMUSG00000027778	Ift80	0.819504	0.0190468	-0.00378759	0.00145908	0.108	0.1055	1	0	0.530667	0.238373	-0.00577511	0.00875657	0.116	0.11325	1	0	Congruent	DD
ENSMUSG00000027782	Kpna4	0.370608	0.217961	-0.0912925	0.0139059	0.242	0.2455	1	0	0.694938	0.189815	-0.0295766	0.00798934	0.275	0.2755	1	0	Congruent	DD
ENSMUSG00000027784	Ppm1l	0.170302	0.0142031	-0.108178	0.00662091	0.204	0.216	1	0	0.318015	0.17732	-0.00587189	0.0120264	0.277	0.2895	1	0	Congruent	DD
ENSMUSG00000027797	Dclk1	0.0237626	0.00265613	0.0317263	0.00397902	0.891	0.939	1	0	6.14725e-08	8.82015e-08	0.135575	0.0117021	0.951	0.957	0.00176156	0.0025275	Congruent	UU
ENSMUSG00000027799	Nbea	0.147135	0.0609416	-0.00332433	0.00753569	0.983	0.9865	1	0	0.761268	0.336072	-0.0104592	0.0119418	0.991	0.9945	1	0	Congruent	DD
ENSMUSG00000027804	Ppid	0.307615	0.159762	0.00585912	0.00536788	0.113	0.1015	1	0	0.0208915	0.0229872	0.0345319	0.0112731	0.13	0.10525	1	0	Congruent	UU
ENSMUSG00000027805	Pfn2	0.00236701	0.000261171	0.0472384	0	0.13	0.098	1	0	0.00429648	0.00547269	0.0405327	0.00622148	0.131	0.1025	1	0	Congruent	UU
ENSMUSG00000027806	Tsc22d2	0.25434	0.119182	-0.0172024	0.00515523	0.259	0.237	1	0	0.180516	0.109133	-0.00382578	0.00988017	0.266	0.24275	1	0	Congruent	DD
ENSMUSG00000027810	Eif2a	0.466022	0.076253	0.00561845	0.00140483	0.149	0.14	1	0	0.264152	0.21384	0.0035116	0.00737612	0.165	0.1505	1	0	Congruent	UU
ENSMUSG00000027822	Slc33a1	0.485892	0.125192	0.0120097	0.000487289	0.112	0.1045	1	0	0.366482	0.366107	0.0114264	0.0105379	0.127	0.1175	1	0	Congruent	UU
ENSMUSG00000027827	Kcnab1	2.54044e-15	2.74292e-15	0.189581	0.00772252	0.9	0.888	6.30945e-11	6.8123e-11	0.00465092	0.00524496	0.0704427	0.0128791	0.913	0.91925	1	0	Congruent	UU
ENSMUSG00000027829	Ccnl1	0.00916619	0.00286369	0.0488318	0.00338495	0.243	0.208	1	0	0.326393	0.233064	0.0100005	0.0182869	0.264	0.246	1	0	Congruent	UU
ENSMUSG00000027849	Syt6	2.35101e-11	2.17694e-11	0.16755	0.00206967	0.318	0.2225	5.83896e-07	5.40665e-07	0.0101969	0.0125538	0.0760848	0.0190249	0.286	0.2475	0.860474	0.279052	Congruent	UU
ENSMUSG00000027858	Tspan2	4.96433e-18	2.45408e-18	-0.249035	0.000783217	0.066	0.1545	1.23294e-13	6.09495e-14	7.19098e-19	4.01662e-19	-0.236908	0.012244	0.069	0.1495	2.06065e-14	1.151e-14	Congruent	DD
ENSMUSG00000027881	Prpf38b	8.8482e-05	6.47454e-05	0.0449166	0.00411808	0.192	0.1405	1	0	0.00183209	0.0011006	0.0349297	0.00389762	0.213	0.17375	1	0	Congruent	UU
ENSMUSG00000027882	Stxbp3	5.4387e-05	5.30793e-05	-0.140375	0.00618804	0.089	0.128	0.709296	0.411118	0.036887	0.053372	-0.0685524	0.0140666	0.101	0.12175	1	0	Congruent	DD
ENSMUSG00000027889	Ampd2	4.98338e-07	5.9218e-07	0.094316	0.00353427	0.129	0.079	0.0123767	0.0147074	0.000309696	0.000536742	0.0533413	0.00674119	0.116	0.08225	0.935256	0.129488	Congruent	UU
ENSMUSG00000027893	Ahcyl1	1.12409e-05	1.36143e-05	0.0925351	0.00925555	0.376	0.3025	0.27918	0.338125	4.07021e-08	7.15854e-08	0.141873	0.0199359	0.406	0.321	0.00116636	0.00205135	Congruent	UU
ENSMUSG00000027894	Slc6a17	0.00281535	0.002105	0.062319	0.00330066	0.177	0.142	1	0	0.0166287	0.017183	0.0495716	0.0138659	0.202	0.17125	1	0	Congruent	UU
ENSMUSG00000027933	Ints3	5.17716e-05	9.58615e-06	0.0561309	0.00138763	0.175	0.126	1	0	4.74353e-09	8.6351e-09	0.095328	0.00517468	0.192	0.12625	0.000135931	0.000247447	Congruent	UU
ENSMUSG00000027951	Adar	2.38705e-06	5.09216e-07	0.111201	0.0021454	0.277	0.2125	0.0592847	0.0126469	5.6892e-07	7.53545e-07	0.112939	0.00787979	0.297	0.233	0.016303	0.0215936	Congruent	UU
ENSMUSG00000027963	Extl2	2.4411e-06	1.05493e-06	0.0699124	0.0020261	0.12	0.0735	0.0606271	0.0262002	0.00397072	0.00693623	0.0526076	0.00918205	0.108	0.079	0.777026	0.445948	Congruent	UU
ENSMUSG00000027965	Olfm3	3.80143e-06	2.28236e-06	0.0737178	0.00594186	0.247	0.181	0.0944124	0.0566848	0.000841097	0.000882255	0.131265	0.0307044	0.293	0.24325	0.751504	0.496991	Congruent	UU
ENSMUSG00000027993	Trim2	3.34514e-05	2.91026e-05	-0.144049	0.000914513	0.652	0.714	0.659854	0.481039	0.153195	0.119666	-0.0568744	0.0216399	0.715	0.73125	1	0	Congruent	DD
ENSMUSG00000028005	Gucy1b1	3.81693e-08	3.34483e-08	0.130805	0.00621912	0.302	0.2225	0.000947974	0.000830723	1.10692e-10	2.16715e-10	0.140628	0.0122927	0.343	0.25075	3.172e-06	6.21017e-06	Congruent	UU
ENSMUSG00000028007	Snx7	0.313647	0.0309981	0.00830729	0	0.102	0.0915	1	0	0.0329784	0.0365794	0.033902	0.0053554	0.123	0.10275	1	0	Congruent	UU
ENSMUSG00000028013	Ppa2	0.000436047	0.000378706	0.051514	0.00701474	0.114	0.0795	1	0	0.0794088	0.123522	0.0328485	0.0124281	0.111	0.092	1	0	Congruent	UU
ENSMUSG00000028020	Glrb	0.724898	0.069398	-0.035593	0.00430687	0.259	0.246	1	0	0.457483	0.23198	-0.0476119	0.00710526	0.267	0.273	1	0	Congruent	DD
ENSMUSG00000028033	Kcnq5	1.56881e-41	1.52652e-41	0.504945	0.00521136	0.945	0.928	3.89629e-37	3.79127e-37	1.02091e-08	1.21515e-08	0.213772	0.033112	0.948	0.94775	0.000292552	0.000348214	Congruent	UU
ENSMUSG00000028035	Dnajb4	8.83862e-06	1.12955e-05	0.0973571	0.00573237	0.246	0.1845	0.219516	0.280536	0.342786	0.217382	0.0112848	0.0100032	0.253	0.23825	1	0	Congruent	UU
ENSMUSG00000028041	Adam15	0.000314308	0.000199233	0.0604127	0.00049294	0.128	0.0905	1	0	2.09675e-05	2.69318e-05	0.0525743	0.00547313	0.108	0.07075	0.430867	0.471242	Congruent	UU
ENSMUSG00000028053	Ash1l	0.269836	0.0308015	-0.0183923	0.00497145	0.671	0.7165	1	0	0.618361	0.307971	-0.0183942	0.0157117	0.69	0.70625	1	0	Congruent	DD
ENSMUSG00000028070	Naxe	0.0107763	0.00592786	0.0277185	0.000989466	0.103	0.0785	1	0	5.37046e-05	4.30457e-05	0.0623447	0.0125485	0.102	0.06675	0.750092	0.499817	Congruent	UU
ENSMUSG00000028078	Dclk2	0.273666	0.10191	0.0247044	0.00480443	0.279	0.261	1	0	0.0194673	0.0220526	0.0535459	0.00111898	0.315	0.282	1	0	Congruent	UU
ENSMUSG00000028080	Lrba	0.527499	0.131023	-0.0187312	0.00682631	0.804	0.8645	1	0	0.451622	0.303091	-0.0195134	0.0237854	0.855	0.86375	1	0	Congruent	DD
ENSMUSG00000028081	Rps3a1	0.0130515	0.00487565	0.0257389	0.00440666	0.117	0.091	1	0	0.282686	0.20234	0.00985017	0.00988551	0.1	0.089	1	0	Congruent	UU
ENSMUSG00000028082	Sh3d19	3.21708e-08	3.3072e-08	-0.215482	0.00938425	0.098	0.1555	0.000798994	0.000821377	6.4843e-09	8.16722e-09	-0.178754	0.0194258	0.091	0.146	0.000185814	0.00023404	Congruent	DD
ENSMUSG00000028086	Fbxw7	0.0673987	0.03464	0.0236859	0.00733916	0.339	0.3055	1	0	0.192594	0.234546	0.0334651	0.0121867	0.432	0.409	1	0	Congruent	UU
ENSMUSG00000028093	Acp6	0.0297003	0.00913941	0.0325936	0.00198374	0.112	0.09	1	0	0.000107174	0.00015304	0.0508725	0.00934853	0.107	0.0725	0.572088	0.498831	Congruent	UU
ENSMUSG00000028096	Gpr89	0.0263584	0.0148234	0.0309544	0.0029498	0.121	0.0975	1	0	0.0112071	0.0121665	0.0304425	0.0069738	0.123	0.098	1	0	Congruent	UU
ENSMUSG00000028098	Rnf115	0.0359658	0.0189781	0.0425748	0.00413477	0.168	0.143	1	0	0.0520901	0.0727102	0.0294108	0.0181031	0.174	0.14875	1	0	Congruent	UU
ENSMUSG00000028107	Tars2	0.268311	0.131307	0.00742001	0.00382433	0.13	0.1175	1	0	0.00696868	0.00904441	0.0415612	0.007083	0.116	0.0895	1	0	Congruent	UU
ENSMUSG00000028126	Pip5k1a	5.84013e-09	6.7737e-10	0.134296	0.00193245	0.36	0.268	0.000145045	1.68232e-05	1.12263e-06	1.81583e-06	0.102562	0.00973723	0.365	0.29425	0.0321701	0.0520344	Congruent	UU
ENSMUSG00000028127	Abcd3	0.00604288	0.00073078	0.0338491	0.00538097	0.196	0.159	1	0	1.77794e-05	2.69299e-05	0.0704213	0.00564099	0.202	0.152	0.343755	0.442305	Congruent	UU
ENSMUSG00000028137	Celf3	6.2185e-20	1.78863e-20	0.185453	0.000932912	0.269	0.1485	1.54443e-15	4.44224e-16	3.00083e-18	5.57304e-18	0.149959	0.0101396	0.249	0.14675	8.59917e-14	1.59701e-13	Congruent	UU
ENSMUSG00000028149	Rap1gds1	0.896376	0.0950519	-0.057583	0.00998187	0.361	0.352	1	0	0.00538961	0.00864051	-0.0658921	0.0135919	0.55	0.6005	1	0	Congruent	DD
ENSMUSG00000028152	Tspan5	1.82364e-10	2.52803e-10	-0.211344	0.0162803	0.615	0.7185	4.52919e-06	6.27861e-06	2.46097e-10	2.04096e-10	-0.185004	0.00233998	0.7	0.7645	7.05215e-06	5.84856e-06	Congruent	DD
ENSMUSG00000028161	Ppp3ca	6.72674e-37	3.22031e-38	0.395118	0.00148669	0.979	0.9715	1.67065e-32	7.99795e-34	2.13549e-12	2.01161e-12	0.20458	0.0214696	0.98	0.98125	6.11947e-08	5.76448e-08	Congruent	UU
ENSMUSG00000028163	Nfkb1	0.258658	0.0282707	0.00224227	0.00135988	0.168	0.153	1	0	0.442239	0.260187	0.000139957	0.00841335	0.179	0.168	1	0	Congruent	UU
ENSMUSG00000028176	Lrrc7	7.57682e-38	1.06023e-37	0.372027	0.0089463	0.984	0.974	1.88178e-33	2.6332e-33	2.16491e-08	4.1634e-08	0.152156	0.0192826	0.988	0.983	0.000620375	0.00119306	Congruent	UU
ENSMUSG00000028180	Zranb2	0.033033	0.010544	0.0187758	0.00819107	0.374	0.331	1	0	0.0101365	0.00616878	0.0289023	0.00893523	0.414	0.369	1	0	Congruent	UU
ENSMUSG00000028184	Adgrl2	5.063e-10	5.12885e-10	0.133652	0.00389705	0.406	0.302	1.25745e-05	1.2738e-05	0.192235	0.179078	0.0200148	0.0358217	0.469	0.4575	1	0	Congruent	UU
ENSMUSG00000028218	Cibar1	0.327819	0.144095	0.022177	0.00278854	0.161	0.1495	1	0	0.0539622	0.0382365	0.0260728	0.00970055	0.187	0.16325	1	0	Congruent	UU
ENSMUSG00000028222	Calb1	6.18611e-11	6.8204e-11	0.152327	0.00408147	0.235	0.152	1.53638e-06	1.69391e-06	0.019817	0.0232699	0.0649636	0.0245492	0.227	0.1935	0.944629	0.110741	Congruent	UU
ENSMUSG00000028226	Mmp16	0.120646	0.0406114	-0.0436172	0.00642969	0.725	0.8125	1	0	0.181352	0.110683	-0.0479242	0.0111171	0.822	0.86225	1	0	Congruent	DD
ENSMUSG00000028229	Rmdn1	0.901595	0.00629403	-0.0128603	0.00144855	0.325	0.3185	1	0	0.588197	0.330389	-0.025618	0.0110531	0.393	0.389	1	0	Congruent	DD
ENSMUSG00000028232	Tmem68	0.0426185	0.029215	0.0273143	0.00389925	0.119	0.0975	1	0	0.129689	0.0499838	0.0190848	0.00819215	0.13	0.11475	1	0	Congruent	UU
ENSMUSG00000028233	Tgs1	0.00721116	0.00657135	0.0364778	0.00492822	0.123	0.094	1	0	0.279503	0.158426	0.0139251	0.00479634	0.134	0.12325	1	0	Congruent	UU
ENSMUSG00000028243	Ubxn2b	0.193261	0.0892303	0.0217315	0.00580451	0.129	0.115	1	0	0.021255	0.0230291	0.0454357	0.0102053	0.181	0.153	1	0	Congruent	UU
ENSMUSG00000028245	Nsmaf	0.00105514	0.000740649	0.040847	0.010845	0.359	0.301	1	0	1.98048e-05	2.22097e-05	0.0892119	0.00588911	0.376	0.31025	0.508461	0.567663	Congruent	UU
ENSMUSG00000028246	Faxc	0.10395	0.0917269	0.0327772	0.00797767	0.109	0.0925	1	0	0.058209	0.069635	0.0367041	0.00829196	0.129	0.109	1	0	Congruent	UU
ENSMUSG00000028249	Sdcbp	2.34242e-06	2.10138e-06	0.101866	0.00231062	0.204	0.146	0.0581765	0.0521899	0.0206392	0.0319353	0.0546875	0.0105213	0.192	0.16275	1	0	Congruent	UU
ENSMUSG00000028252	Ccnc	0.0547231	0.0408808	0.0291747	0.00327794	0.156	0.132	1	0	0.00479797	0.00471739	0.0512442	0.00975295	0.179	0.14625	1	0	Congruent	UU
ENSMUSG00000028256	Odf2l	0.278162	0.0514595	0.0145206	0.000982793	0.104	0.0935	1	0	0.430561	0.345666	0.00442949	0.00863856	0.109	0.1	1	0	Congruent	UU
ENSMUSG00000028261	Ndufaf4	0.0460352	0.0286267	0.0251637	0.00768953	0.233	0.203	1	0	0.21431	0.171522	0.0229666	0.0169169	0.243	0.2235	1	0	Congruent	UU
ENSMUSG00000028266	Lmo4	8.29464e-11	1.15225e-10	0.13736	0.00709254	0.209	0.127	2.06006e-06	2.86173e-06	0.000195148	0.000231412	0.0695646	0.00983382	0.21	0.16225	0.548028	0.522805	Congruent	UU
ENSMUSG00000028274	Rngtt	0.559772	0.0576539	-0.041521	0.00113496	0.288	0.29	1	0	0.534411	0.214097	-0.028408	0.0150437	0.353	0.34625	1	0	Congruent	DD
ENSMUSG00000028277	Ube2j1	0.782126	0.159383	-0.0198152	0.00371129	0.137	0.1315	1	0	0.696833	0.260671	-0.002833	0.00526306	0.131	0.12675	1	0	Congruent	DD
ENSMUSG00000028278	Rragd	0.00581403	0.00371247	0.044959	0.00403617	0.105	0.079	1	0	0.00165729	0.00192579	0.0598176	0.0101613	0.126	0.0955	0.810837	0.378326	Congruent	UU
ENSMUSG00000028284	Map3k7	0.23114	0.13657	0.00876084	0.00642272	0.217	0.1975	1	0	0.378	0.375441	0.0228466	0.0134173	0.23	0.21675	1	0	Congruent	UU
ENSMUSG00000028292	Rars2	0.0135083	0.00408957	0.0377045	0.00388954	0.232	0.198	1	0	0.491017	0.34546	0.00130736	0.0127885	0.229	0.21725	1	0	Congruent	UU
ENSMUSG00000028330	Ncbp1	0.0768461	0.02688	0.021631	0.00237076	0.151	0.13	1	0	0.0776497	0.0462245	0.0266046	0.0049617	0.174	0.1535	1	0	Congruent	UU
ENSMUSG00000028345	Tex10	0.00331547	0.00197999	0.0395101	0.00522223	0.288	0.243	1	0	5.06392e-05	7.15061e-05	0.0733861	0.00956986	0.302	0.2435	0.58076	0.442274	Congruent	UU
ENSMUSG00000028347	Tmeff1	0.00156946	0.000636234	-0.162412	0.00209546	0.244	0.2785	1	0	0.0380249	0.0387421	-0.115816	0.0289465	0.265	0.28475	1	0	Congruent	DD
ENSMUSG00000028360	Slc44a5	0.411399	0.109828	-0.0580458	0.00194349	0.208	0.1925	1	0	0.35167	0.34891	-0.0719687	0.0336216	0.182	0.19375	1	0	Congruent	DD
ENSMUSG00000028373	Astn2	0.612735	0.115903	-0.155007	0.00203773	0.285	0.281	1	0	3.74902e-07	3.84674e-07	-0.153769	0.0165506	0.421	0.50425	0.0107432	0.0110232	Congruent	DD
ENSMUSG00000028381	Ugcg	0.00396709	0.0041151	0.0475899	0.00813246	0.151	0.117	1	0	0.00626763	0.00560567	0.0465055	0.00650676	0.146	0.118	1	0	Congruent	UU
ENSMUSG00000028382	Ptbp3	0.392444	0.357754	-0.0484167	0.0227849	0.138	0.1465	1	0	0.632135	0.192432	-0.022768	0.00686146	0.143	0.14675	1	0	Congruent	DD
ENSMUSG00000028385	Snx30	0.00160984	0.00146684	-0.0994903	0.0013373	0.107	0.139	1	0	0.442964	0.317723	-0.0456024	0.010961	0.118	0.124	1	0	Congruent	DD
ENSMUSG00000028397	Kdm4c	0.113129	0.00321243	0.00534136	0.00206367	0.387	0.3495	1	0	0.353803	0.170996	0.00784964	0.0137744	0.467	0.447	1	0	Congruent	UU
ENSMUSG00000028399	Ptprd	0.000412724	0.000281837	-0.186466	0.0104925	0.973	0.962	1	0	5.5988e-11	9.73919e-11	-0.216579	0.00391709	0.969	0.97725	1.60439e-06	2.79086e-06	Congruent	DD
ENSMUSG00000028402	Mpdz	0.153414	0.00851732	-0.0489637	0.00225445	0.115	0.1295	1	0	0.525716	0.178385	-0.0283808	0.00263006	0.137	0.14225	1	0	Congruent	DD
ENSMUSG00000028403	Zdhhc21	0.516894	0.0875666	0.00455961	0.00276711	0.157	0.149	1	0	0.106139	0.080987	0.0224894	0.00942915	0.187	0.16675	1	0	Congruent	UU
ENSMUSG00000028410	Dnaja1	2.86168e-17	4.04251e-17	0.196283	0.0115724	0.291	0.1705	7.10728e-13	1.004e-12	2.84963e-06	4.20678e-06	0.0865463	0.00746535	0.247	0.18775	0.081659	0.12055	Congruent	UU
ENSMUSG00000028412	Slc44a1	7.68002e-09	9.58534e-09	-0.309861	0.0276308	0.314	0.38	0.000190741	0.000238062	2.9428e-10	5.31247e-10	-0.236661	0.00417558	0.337	0.414	8.43288e-06	1.52234e-05	Congruent	DD
ENSMUSG00000028414	Fktn	0.0509754	0.0302151	-0.049061	0.00338676	0.086	0.104	1	0	0.45344	0.284839	-0.00436298	0.011627	0.131	0.1205	1	0	Congruent	DD
ENSMUSG00000028423	Nfx1	0.00766467	0.00441144	0.0434601	0.0041097	0.346	0.299	1	0	0.00124433	0.00156126	0.0758659	0.01228	0.393	0.345	1	0	Congruent	UU
ENSMUSG00000028431	Elp1	0.0690863	0.0292121	0.0240494	0.00476256	0.145	0.123	1	0	0.283761	0.39223	0.0139698	0.0138838	0.154	0.1395	1	0	Congruent	UU
ENSMUSG00000028433	Ubap2	0.00881831	0.005803	0.0587035	0.00601854	0.183	0.1505	1	0	0.00660273	0.00441382	0.0374902	0.00318919	0.189	0.15725	1	0	Congruent	UU
ENSMUSG00000028437	Ubap1	0.0613541	0.0233342	0.0208011	0.00437099	0.123	0.102	1	0	0.147787	0.114844	0.0148464	0.00934173	0.136	0.119	1	0	Congruent	UU
ENSMUSG00000028439	Fam219a	0.108176	0.058154	0.0290408	0.00567595	0.216	0.1935	1	0	0.0643117	0.0654881	0.036076	0.0165492	0.247	0.217	1	0	Congruent	UU
ENSMUSG00000028452	Vcp	0.00176432	0.00183256	0.0344783	0.00548218	0.186	0.144	1	0	0.00203539	0.0017695	0.0470672	0.00846582	0.19	0.15375	1	0	Congruent	UU
ENSMUSG00000028467	Gba2	1.95244e-06	1.40495e-06	0.089987	0.00235326	0.188	0.1295	0.0484908	0.0348934	7.16306e-11	1.36618e-10	0.114049	0.00589249	0.196	0.1245	2.05265e-06	3.91492e-06	Congruent	UU
ENSMUSG00000028476	Reck	0.282821	0.0915865	0.00104132	0.00343069	0.101	0.0895	1	0	0.0106385	0.0203684	0.039781	0.0137402	0.14	0.108	1	0	Congruent	UU
ENSMUSG00000028478	Clta	0.0307566	0.00188764	0.0311011	0.0028995	0.136	0.112	1	0	0.0153736	0.0185736	0.0315325	0.00569117	0.134	0.109	1	0	Congruent	UU
ENSMUSG00000028483	Snapc3	0.567493	0.0961042	-0.0433042	0.00517182	0.188	0.191	1	0	0.50915	0.305212	-0.0213019	0.0179352	0.223	0.21075	1	0	Congruent	DD
ENSMUSG00000028484	Psip1	0.0132636	0.0127772	0.0578415	0.0149502	0.318	0.28	1	0	0.00180637	0.00269834	0.06144	0.012318	0.371	0.31775	0.792376	0.399621	Congruent	UU
ENSMUSG00000028488	Sh3gl2	0.000192691	9.31203e-06	-0.0803325	0.00269522	0.351	0.4135	1	0	0.000643145	0.00069064	-0.0653107	0.0110288	0.521	0.5825	1	0	Congruent	DD
ENSMUSG00000028496	Mllt3	0.667679	0.0246811	-0.0202902	0.00263036	0.725	0.786	1	0	0.331712	0.338383	-0.0557534	0.0262945	0.797	0.823	1	0	Congruent	DD
ENSMUSG00000028514	Usp24	0.690075	0.319985	-0.0722746	0.00450251	0.35	0.344	1	0	0.402045	0.327547	-0.00963502	0.0153573	0.392	0.36725	1	0	Congruent	DD
ENSMUSG00000028519	Dab1	6.63332e-10	4.44206e-10	0.1336	0.00479897	0.93	0.9405	1.64745e-05	1.10323e-05	0.256563	0.275154	0.0170961	0.0174886	0.941	0.95475	1	0	Congruent	UU
ENSMUSG00000028522	Mier1	0.667639	0.155273	-0.0387771	0.00122051	0.228	0.2165	1	0	0.53339	0.235817	-0.0292544	0.00997722	0.259	0.26525	1	0	Congruent	DD
ENSMUSG00000028524	Sgip1	0.00315699	0.00306455	0.0759985	0.0110329	0.85	0.892	1	0	0.126667	0.109721	0.040549	0.0133987	0.899	0.92725	1	0	Congruent	UU
ENSMUSG00000028525	Pde4b	7.01169e-23	9.80231e-23	-0.78374	0.0250855	0.81	0.843	1.74142e-18	2.4345e-18	6.51214e-16	1.30217e-15	-0.547139	0.0321102	0.863	0.88525	1.86612e-11	3.7315e-11	Congruent	DD
ENSMUSG00000028528	Dnajc6	0.938302	0.00316767	-0.0636529	0.00789219	0.407	0.3925	1	0	0.00760261	0.00731316	-0.0804802	0.0125935	0.55	0.59125	1	0	Congruent	DD
ENSMUSG00000028538	St3gal3	0.10141	0.0166616	-0.0786977	0.00423119	0.177	0.194	1	0	0.0109275	0.00961948	-0.091933	0.00709193	0.191	0.217	1	0	Congruent	DD
ENSMUSG00000028549	Itgb3bp	0.12447	0.108512	0.01771	0.00678158	0.117	0.0995	1	0	0.166933	0.136311	0.0247002	0.0113872	0.126	0.11175	1	0	Congruent	UU
ENSMUSG00000028550	Atg4c	0.371305	0.209745	-0.0546936	0.0120335	0.197	0.204	1	0	0.816186	0.229902	-0.0412642	0.0104349	0.225	0.22375	1	0	Congruent	DD
ENSMUSG00000028552	Eps15	5.28444e-10	5.75494e-10	-0.205405	0.00352651	0.135	0.208	1.31244e-05	1.4293e-05	0.00348239	0.00325062	-0.0826508	0.0188563	0.183	0.2165	1	0	Congruent	DD
ENSMUSG00000028556	Dock7	1.40016e-05	2.59539e-06	0.104098	0.00414615	0.367	0.3005	0.347744	0.0644591	0.0207191	0.0203647	0.0477158	0.0133967	0.401	0.3625	1	0	Congruent	UU
ENSMUSG00000028563	Tm2d1	0.157737	0.0454528	0.00705019	0.00142777	0.133	0.116	1	0	0.00301245	0.00310675	0.0558982	0.00717059	0.148	0.11675	1	0	Congruent	UU
ENSMUSG00000028565	Nfia	7.27671e-17	7.14251e-17	-0.430599	0.0103237	0.148	0.252	1.80724e-12	1.77391e-12	4.61473e-10	6.4769e-10	-0.191947	0.0277409	0.178	0.257	1.3224e-05	1.85602e-05	Congruent	DD
ENSMUSG00000028572	Hook1	3.72074e-06	5.06529e-07	0.0942654	0.00122637	0.318	0.2465	0.0924084	0.0125802	1.10219e-09	1.6009e-09	0.125549	0.00845032	0.369	0.28425	3.15844e-05	4.58754e-05	Congruent	UU
ENSMUSG00000028573	Fggy	0.1899	0.00859507	-0.0530273	0.000475036	0.098	0.1085	1	0	0.486935	0.286587	-0.0205439	0.0111729	0.104	0.1065	1	0	Congruent	DD
ENSMUSG00000028576	Ift74	0.00437964	0.00304779	0.0375542	0.00145423	0.135	0.104	1	0	0.0686812	0.0692686	0.0258378	0.00902436	0.133	0.113	1	0	Congruent	UU
ENSMUSG00000028578	Caap1	0.036886	0.0162379	-0.0752222	0.00172759	0.164	0.187	1	0	0.437064	0.203437	-0.0294071	0.0101902	0.187	0.19475	1	0	Congruent	DD
ENSMUSG00000028580	Pum1	0.128599	0.0929728	0.0129314	0.0142489	0.394	0.3585	1	0	0.0236507	0.0414882	0.0449476	0.0169755	0.439	0.3935	1	0	Congruent	UU
ENSMUSG00000028618	Tmem59	0.00547067	0.00357738	0.0286558	0.000693736	0.364	0.3085	1	0	0.0031126	0.00551387	0.0420662	0.0166402	0.344	0.2915	1	0	Congruent	UU
ENSMUSG00000028637	Ccdc30	0.0673924	0.0444836	0.0439122	0.00700488	0.169	0.1465	1	0	0.0042151	0.00475193	0.0582203	0.00466435	0.201	0.16625	1	0	Congruent	UU
ENSMUSG00000028639	Ybx1	0.132245	0.0798879	0.0259476	0.0065324	0.218	0.1975	1	0	0.00460724	0.00841156	0.0576108	0.0180934	0.258	0.21425	1	0	Congruent	UU
ENSMUSG00000028648	Ndufs5	9.83959e-08	4.11742e-08	0.0898574	0.00099332	0.143	0.0865	0.00244376	0.0010226	7.10865e-09	1.35827e-08	0.0810416	0.00572669	0.123	0.07	0.000203705	0.000389227	Congruent	UU
ENSMUSG00000028657	Ppt1	0.0464217	0.0286774	0.0310673	0.00887855	0.2	0.174	1	0	0.0471389	0.0772606	0.030001	0.00781273	0.196	0.16825	1	0	Congruent	UU
ENSMUSG00000028676	Srsf10	0.077929	0.0400784	0.0421779	0.00750918	0.21	0.1875	1	0	0.503446	0.359169	0.00730035	0.0170765	0.227	0.2195	1	0	Congruent	UU
ENSMUSG00000028677	Rnf220	1.52638e-23	1.96957e-23	-0.746503	0.015042	0.218	0.3435	3.79093e-19	4.89163e-19	5.39114e-20	6.20523e-20	-0.556808	0.0391326	0.212	0.3185	1.54488e-15	1.77817e-15	Congruent	DD
ENSMUSG00000028710	Atpaf1	0.0495911	0.0299432	0.0223659	0.00441301	0.12	0.098	1	0	0.0424758	0.0515888	0.0314704	0.0076093	0.135	0.1135	1	0	Congruent	UU
ENSMUSG00000028745	Capzb	0.417932	0.096565	0.0100824	0.00190769	0.129	0.12	1	0	0.372172	0.182807	0.00502638	0.00500652	0.141	0.13125	1	0	Congruent	UU
ENSMUSG00000028758	Kif17	1.36037e-12	1.58193e-12	0.135717	0.00287498	0.21	0.1225	3.3786e-08	3.92889e-08	0.00126671	0.0019828	0.0648113	0.00697743	0.175	0.1385	0.878782	0.242436	Congruent	UU
ENSMUSG00000028759	Hp1bp3	0.0113155	0.00558451	0.0198617	0.00043512	0.221	0.1845	1	0	0.0217781	0.0348648	0.0286348	0.0121235	0.239	0.2045	1	0	Congruent	UU
ENSMUSG00000028760	Eif4g3	5.0576e-07	6.40417e-07	-0.135892	0.0146956	0.636	0.735	0.012561	0.0159054	0.274312	0.264535	-0.0356216	0.0137396	0.667	0.70025	1	0	Congruent	DD
ENSMUSG00000028771	Ptpn12	0.0314821	0.00202948	0.0317696	0.00039502	0.29	0.255	1	0	0.000172168	0.000219601	0.0864132	0.0192325	0.34	0.28325	0.658687	0.468259	Congruent	UU
ENSMUSG00000028782	Adgrb2	2.88329e-09	3.88199e-09	0.112104	0.00847766	0.204	0.128	7.16095e-05	9.64131e-05	1.21769e-13	2.25472e-13	0.13755	0.0177921	0.225	0.13375	3.48942e-09	6.46113e-09	Congruent	UU
ENSMUSG00000028785	Hpca	5.41516e-19	3.10358e-19	0.217092	0.00444119	0.292	0.17	1.34491e-14	7.70805e-15	4.39916e-06	8.22452e-06	0.105584	0.0152228	0.247	0.18575	0.126062	0.235682	Congruent	UU
ENSMUSG00000028788	Ptp4a2	0.00186862	0.000686581	0.0546036	0.00227456	0.191	0.152	1	0	0.171615	0.111571	0.00500196	0.0100288	0.184	0.165	1	0	Congruent	UU
ENSMUSG00000028790	Khdrbs1	0.955472	0.000132687	-0.0161082	0.00222108	0.171	0.168	1	0	0.641891	0.215998	-0.0286397	0.00870413	0.187	0.184	1	0	Congruent	DD
ENSMUSG00000028796	Phc2	1.19822e-05	1.29699e-05	0.086633	0.00846594	0.379	0.304	0.297589	0.32212	0.0368342	0.0650228	0.0406335	0.0195444	0.379	0.33625	1	0	Congruent	UU
ENSMUSG00000028797	Tmem234	0.299183	0.067579	-0.000618778	0.00351167	0.189	0.1735	1	0	0.795567	0.247377	-0.0208768	0.00773821	0.179	0.18025	1	0	Congruent	DD
ENSMUSG00000028803	Nipal3	0.00548394	0.00488325	0.0280704	0.00300631	0.103	0.076	1	0	2.04674e-05	3.09181e-05	0.0607603	0.00489308	0.11	0.073	0.359884	0.438957	Congruent	UU
ENSMUSG00000028804	Csmd2	0.000198769	0.00016417	-0.0991226	0.00463174	0.452	0.5205	1	0	0.00350978	0.00518997	-0.0765706	0.0169712	0.51	0.564	1	0	Congruent	DD
ENSMUSG00000028809	Srrm1	0.0200984	0.00417786	0.0182692	0.00259991	0.436	0.382	1	0	0.000756058	0.000322002	0.0571565	0.0110068	0.483	0.43025	1	0	Congruent	UU
ENSMUSG00000028811	Yars	0.696534	0.0720825	0.00754801	0	0.112	0.108	1	0	0.315201	0.12454	0.00786861	0.00371349	0.11	0.10025	1	0	Congruent	UU
ENSMUSG00000028820	Sfpq	0.10851	0.000193176	-0.0434377	0.000491989	0.666	0.7185	1	0	0.0873446	0.0877385	-0.0435777	0.010173	0.706	0.7435	1	0	Congruent	DD
ENSMUSG00000028822	Tmem50a	0.00196258	0.000468202	0.0114866	0.0022038	0.189	0.145	1	0	0.0325852	0.0213037	0.0226938	0.00459931	0.16	0.13575	1	0	Congruent	UU
ENSMUSG00000028826	Maco1	0.00362371	0.000316696	0.0545883	0.00123578	0.281	0.2365	1	0	0.00144645	0.00197711	0.0654324	0.00721433	0.333	0.28275	0.916633	0.166734	Congruent	UU
ENSMUSG00000028833	Ncdn	7.98431e-20	1.12893e-19	0.209382	0.0103093	0.257	0.134	1.98298e-15	2.8038e-15	1.14935e-19	1.26543e-19	0.16648	0.00485663	0.238	0.1345	3.29357e-15	3.62622e-15	Congruent	UU
ENSMUSG00000028837	Psmb2	0.227833	0.14775	0.00570489	0.00806793	0.188	0.1695	1	0	0.159419	0.198099	0.022994	0.00959712	0.203	0.1835	1	0	Congruent	UU
ENSMUSG00000028842	Ago3	0.000387855	0.000130752	-0.112239	0.00356336	0.571	0.6375	1	0	0.371848	0.255178	-0.0308858	0.0108764	0.624	0.6395	1	0	Congruent	DD
ENSMUSG00000028843	Sh3bgrl3	3.19533e-05	3.51316e-05	0.0571944	0.00556763	0.105	0.0655	0.588311	0.582217	3.89313e-06	4.64971e-06	0.0662185	0.00319127	0.108	0.0685	0.111562	0.133242	Congruent	UU
ENSMUSG00000028849	Map7d1	0.00864463	0.00339105	0.0105465	0.00299349	0.204	0.168	1	0	2.12344e-05	2.4943e-05	0.0597315	0.00984975	0.191	0.1405	0.475484	0.504069	Congruent	UU
ENSMUSG00000028854	Slc9a1	0.0705234	0.0182708	0.0347977	0.00187958	0.155	0.133	1	0	0.0442853	0.0483747	0.0247597	0.00603939	0.153	0.13	1	0	Congruent	UU
ENSMUSG00000028863	Meaf6	0.000233873	5.78924e-05	0.0471015	0.000995744	0.119	0.0815	1	0	0.00228707	0.00223178	0.0413821	0.00549629	0.126	0.09625	1	0	Congruent	UU
ENSMUSG00000028868	Wasf2	0.380873	0.140256	-0.0594693	0.00468169	0.102	0.109	1	0	0.358333	0.23854	-0.0110803	0.00807427	0.116	0.105	1	0	Congruent	DD
ENSMUSG00000028869	Gnl2	0.0655681	0.0342211	0.0154602	0.0028669	0.137	0.1155	1	0	0.00420362	0.00411841	0.0429061	0.013516	0.145	0.114	0.91888	0.162239	Congruent	UU
ENSMUSG00000028883	Sema3a	9.42667e-07	7.63346e-07	0.121812	0.000443828	0.204	0.1425	0.0234121	0.0189585	0.65939	0.206649	0.00343559	0.0170228	0.215	0.2115	1	0	Congruent	UU
ENSMUSG00000028898	Trnau1ap	0.0945785	0.0388768	0.0162065	0.00343234	0.109	0.0915	1	0	1.11548e-07	2.22811e-07	0.0760155	0.00886115	0.123	0.0705	0.00319651	0.00638486	Congruent	UU
ENSMUSG00000028906	Epb41	1.35332e-15	1.1749e-15	0.196752	0.0038175	0.464	0.3285	3.3611e-11	2.91797e-11	2.41744e-05	2.67539e-05	0.101858	0.0121895	0.497	0.43575	0.531569	0.54096	Congruent	UU
ENSMUSG00000028911	Srsf4	0.728597	0.22011	-0.00686919	0.00484858	0.116	0.111	1	0	0.522626	0.234459	-0.00359543	0.0109906	0.136	0.1295	1	0	Congruent	DD
ENSMUSG00000028917	Plekhm2	0.200351	0.049034	0.0189769	0.0014218	0.139	0.1245	1	0	0.18087	0.212387	0.0166988	0.010032	0.131	0.11375	1	0	Congruent	UU
ENSMUSG00000028920	Fbxo42	0.0444312	0.0169851	0.0285949	0.00658582	0.216	0.189	1	0	0.0490393	0.00931342	0.0221139	0.0051405	0.205	0.1815	1	0	Congruent	UU
ENSMUSG00000028926	Cdk14	0.0500643	0.0113034	-0.0920007	0.00192734	0.187	0.21	1	0	0.00061435	0.0010953	-0.0894487	0.0107073	0.257	0.306	0.803195	0.39361	Congruent	DD
ENSMUSG00000028931	Kcnab2	0.0145264	0.00802026	0.0365097	0.00301668	0.109	0.0855	1	0	0.00504462	0.00463871	0.0359467	0.00593577	0.116	0.0895	1	0	Congruent	UU
ENSMUSG00000028932	Psmc2	0.00391552	0.00186938	0.0451454	0.000480405	0.148	0.115	1	0	0.000277805	0.000215257	0.0593484	0.00374584	0.156	0.11875	1	0	Congruent	UU
ENSMUSG00000028944	Prkag2	1.40929e-09	1.86859e-09	0.125388	0.00832057	0.272	0.186	3.5001e-05	4.64082e-05	2.48329e-05	2.23647e-05	0.0929228	0.00690775	0.29	0.236	0.561191	0.37975	Congruent	UU
ENSMUSG00000028945	Rheb	0.000290958	9.58844e-05	0.0730717	0	0.161	0.119	1	0	0.00409186	0.00430206	0.0646636	0.013608	0.174	0.141	1	0	Congruent	UU
ENSMUSG00000028949	Smarcd3	1.27731e-06	1.33219e-06	0.0933628	0.00424764	0.198	0.139	0.0317233	0.0330862	0.0176883	0.0307905	0.0574347	0.00998462	0.163	0.136	1	0	Congruent	UU
ENSMUSG00000028954	Nub1	0.153954	0.0883369	0.0190988	0.0065604	0.156	0.1375	1	0	0.165707	0.134263	0.0262996	0.0172732	0.159	0.1405	1	0	Congruent	UU
ENSMUSG00000028957	Per3	0.362175	0.116018	0.00891338	0.00291746	0.109	0.0995	1	0	0.0220787	0.0259506	0.0506244	0.00884182	0.164	0.13725	1	0	Congruent	UU
ENSMUSG00000028959	Fastk	1.61377e-05	1.43785e-05	0.0638862	0.00099332	0.135	0.0895	0.400796	0.357105	8.19798e-09	1.34893e-08	0.0852393	0.00461549	0.137	0.083	0.000234921	0.000386549	Congruent	UU
ENSMUSG00000028960	Ube4b	0.000117977	3.21263e-05	0.0567479	0.0011316	0.363	0.295	1	0	0.121338	0.126672	0.0101432	0.00417135	0.362	0.33225	1	0	Congruent	UU
ENSMUSG00000028969	Cdk5	0.171021	0.0884939	0.00207348	0.00682044	0.11	0.0945	1	0	4.06747e-06	7.90035e-06	0.0700649	0.0100796	0.124	0.07725	0.116558	0.226392	Congruent	UU
ENSMUSG00000028975	Pex14	0.0136975	0.00674547	-0.0453873	0.000468061	0.112	0.138	1	0	0.721029	0.263565	-0.0121608	0.010561	0.135	0.138	1	0	Congruent	DD
ENSMUSG00000028986	Klhl7	7.17807e-05	7.74174e-05	0.0918144	0.0112603	0.384	0.3155	0.711582	0.407885	3.91775e-08	7.73045e-08	0.136203	0.0176906	0.453	0.3655	0.00112267	0.00221524	Congruent	UU
ENSMUSG00000029014	Dnajc2	0.00115051	0.000692682	0.0531056	0.00402621	0.115	0.0835	1	0	0.504713	0.360533	0.0195612	0.0191165	0.119	0.1095	1	0	Congruent	UU
ENSMUSG00000029016	Clcn6	0.265635	0.0701361	0.0017371	0.0034373	0.1	0.088	1	0	0.0607864	0.0861762	0.0278648	0.00803408	0.106	0.0875	1	0	Congruent	UU
ENSMUSG00000029038	Ssu72	3.1833e-06	2.26478e-06	0.0790051	0.00141785	0.18	0.1245	0.0790604	0.0562481	0.110554	0.0903636	0.0115442	0.00697162	0.165	0.14575	1	0	Congruent	UU
ENSMUSG00000029050	Ski	7.66901e-09	9.20733e-09	0.106929	0.00900186	0.348	0.256	0.000190468	0.000228673	9.41105e-09	1.10218e-08	0.107639	0.0132046	0.34	0.25675	0.000269683	0.000315841	Congruent	UU
ENSMUSG00000029053	Prkcz	0.0223158	0.01775	0.0296018	0.00738262	0.401	0.354	1	0	0.000444439	0.000836718	0.0578342	0.0151188	0.408	0.3445	0.748456	0.479464	Congruent	UU
ENSMUSG00000029054	Gabrd	1.71244e-22	3.01667e-23	0.219072	0.00177493	0.315	0.1775	4.25301e-18	7.4922e-19	1.99551e-06	3.56522e-06	0.0972776	0.0163731	0.251	0.18775	0.0571834	0.102165	Congruent	UU
ENSMUSG00000029060	Mib2	0.149706	0.0726142	0.0122202	0.00644249	0.105	0.0895	1	0	2.69874e-05	8.74133e-06	0.0573613	0.00213725	0.109	0.07425	0.773351	0.250492	Congruent	UU
ENSMUSG00000029062	Cdk11b	0.22105	0.0226902	0.0170065	0.000474373	0.137	0.1235	1	0	0.0546015	0.028182	0.0102354	0.00467035	0.153	0.131	1	0	Congruent	UU
ENSMUSG00000029063	Nadk	0.110989	0.00105753	0.0154734	0.00095653	0.135	0.117	1	0	0.00132302	0.0015769	0.0404346	0.00817804	0.127	0.095	1	0	Congruent	UU
ENSMUSG00000029064	Gnb1	0.00548567	0.00530547	0.0425959	0.00787467	0.341	0.2895	1	0	0.00581297	0.00773556	0.0532133	0.00824254	0.35	0.308	1	0	Congruent	UU
ENSMUSG00000029068	Ccnl2	1.23895e-06	9.78397e-07	0.0769137	0.00489276	0.296	0.222	0.0307705	0.0242995	0.00687177	0.0125689	0.0665333	0.0303281	0.311	0.26025	0.75179	0.496419	Congruent	UU
ENSMUSG00000029071	Dvl1	0.280256	0.0922354	0.00218976	0.00486097	0.178	0.163	1	0	1.00374e-05	1.38297e-05	0.0852794	0.0136622	0.205	0.15075	0.287633	0.396305	Congruent	UU
ENSMUSG00000029076	Sdf4	0.322782	0.0172744	0.00341531	0.00193391	0.114	0.1025	1	0	0.000962649	0.00129369	0.0545436	0.00899777	0.129	0.09725	0.951044	0.0979117	Congruent	UU
ENSMUSG00000029088	Kcnip4	7.76544e-35	2.65547e-35	0.335535	0.00355219	0.98	0.949	1.92863e-30	6.59513e-31	4.19048e-06	8.33818e-06	0.11057	0.0392471	0.982	0.98275	0.120082	0.238939	Congruent	UU
ENSMUSG00000029089	5730480H06Rik	0.47794	0.204817	0.00308194	0.00725049	0.119	0.1105	1	0	0.275371	0.151978	0.0183475	0.00926821	0.127	0.116	1	0	Congruent	UU
ENSMUSG00000029093	Sorcs2	2.67057e-16	3.33525e-16	0.217708	0.00601645	0.422	0.288	6.63262e-12	8.28343e-12	0.0147044	0.0233946	0.0735165	0.0238394	0.385	0.34	1	0	Congruent	UU
ENSMUSG00000029094	Afap1	0.0337537	0.00780713	-0.0483404	0.000933766	0.109	0.131	1	0	0.836248	0.117346	-0.00681481	0.00711879	0.126	0.126	1	0	Congruent	DD
ENSMUSG00000029095	Ablim2	5.99368e-07	2.89575e-07	0.144053	0.00200224	0.57	0.5055	0.0148859	0.00719189	0.00907915	0.00924295	0.0509489	0.00386226	0.533	0.48525	1	0	Congruent	UU
ENSMUSG00000029103	Lrpap1	6.12087e-06	7.79194e-06	0.0877402	0.00736234	0.198	0.1405	0.152018	0.193521	0.00213948	0.00291166	0.0611783	0.0116576	0.169	0.135	1	0	Congruent	UU
ENSMUSG00000029120	Ppp2r2c	1.87652e-12	2.46559e-12	0.170259	0.00584609	0.331	0.2285	4.66052e-08	6.12353e-08	0.0630092	0.119466	0.0329845	0.0198891	0.301	0.2615	1	0	Congruent	UU
ENSMUSG00000029121	Crmp1	2.44427e-05	6.67711e-06	0.0814704	0.000450691	0.235	0.1795	0.607058	0.165833	0.000173088	0.000345359	0.0834557	0.0177061	0.223	0.1695	0.258773	0.49425	Congruent	UU
ENSMUSG00000029125	Stx18	0.171411	0.0723132	0.0125678	0.00375742	0.152	0.1355	1	0	0.469486	0.402188	0.00609067	0.0106919	0.177	0.16675	1	0	Congruent	UU
ENSMUSG00000029126	Nsg1	1.86824e-19	2.4177e-19	0.224822	0.00498625	0.289	0.1675	4.63995e-15	6.00459e-15	2.42417e-09	3.07341e-09	0.123082	0.0116997	0.263	0.18675	6.9467e-05	8.80716e-05	Congruent	UU
ENSMUSG00000029130	Rnf32	0.227358	0.0836649	0.0162514	0.00147526	0.107	0.0945	1	0	0.348995	0.186114	0.0157649	0.00601375	0.105	0.09675	1	0	Congruent	UU
ENSMUSG00000029152	Ociad1	0.000345995	6.48187e-05	0.0562336	0.00477005	0.234	0.183	1	0	0.111395	0.11532	0.0156478	0.018647	0.22	0.19475	1	0	Congruent	UU
ENSMUSG00000029153	Ociad2	0.000392317	0.000194525	0.0491016	0.00152449	0.104	0.071	1	0	0.236289	0.188345	0.0158874	0.0109643	0.101	0.089	1	0	Congruent	UU
ENSMUSG00000029166	Mapre3	0.118628	0.000292132	0.0006311	0.000892511	0.184	0.161	1	0	0.325432	0.157848	0.0128513	0.00519227	0.196	0.18325	1	0	Congruent	UU
ENSMUSG00000029168	Dpysl5	0.343806	0.0164653	0.00547773	0	0.119	0.1085	1	0	0.203677	0.205926	0.0224721	0.00947354	0.129	0.1155	1	0	Congruent	UU
ENSMUSG00000029169	Dhx15	0.0696119	0.0276389	0.0354392	0.00279655	0.288	0.2585	1	0	0.0156682	0.0137277	0.0342424	0.00877466	0.318	0.28125	1	0	Congruent	UU
ENSMUSG00000029190	D5Ertd579e	1.6653e-07	1.48395e-07	0.122087	0.00192081	0.352	0.2685	0.00413593	0.00368553	0.139814	0.161396	0.0150505	0.0123274	0.345	0.31425	1	0	Congruent	UU
ENSMUSG00000029203	Ube2k	0.274613	0.00105464	-0.0242367	0.00145257	0.518	0.5455	1	0	0.654827	0.216519	-0.00687127	0.0155701	0.573	0.58175	1	0	Congruent	DD
ENSMUSG00000029206	Nsun7	0.00274776	0.00219248	0.0453828	0.00454856	0.103	0.0745	1	0	0.0774441	0.145183	0.0317915	0.0107332	0.119	0.09775	1	0	Congruent	UU
ENSMUSG00000029207	Apbb2	0.559896	0.0665529	-0.0672473	0.00334253	0.346	0.3445	1	0	0.0468226	0.0510481	-0.102626	0.0255909	0.414	0.42775	1	0	Congruent	DD
ENSMUSG00000029211	Gabra4	1.02075e-09	1.06588e-09	0.19022	0.0106293	0.65	0.5945	2.53512e-05	2.64723e-05	0.169818	0.197858	0.039912	0.0249417	0.656	0.64575	1	0	Congruent	UU
ENSMUSG00000029212	Gabrb1	8.82583e-08	5.55483e-08	0.15247	0.0134183	0.832	0.8665	0.00219198	0.0013796	3.78981e-06	7.3215e-06	0.178219	0.0303291	0.868	0.874	0.108601	0.209805	Congruent	UU
ENSMUSG00000029223	Uchl1	1.37061e-15	5.77703e-16	0.174262	0	0.268	0.1605	3.40405e-11	1.43478e-11	6.26818e-11	1.2332e-10	0.123433	0.0125035	0.267	0.1795	1.79621e-06	3.53385e-06	Congruent	UU
ENSMUSG00000029227	Fip1l1	0.464716	0.207974	-0.0314165	0.00706525	0.255	0.2385	1	0	0.484863	0.305836	-0.000722676	0.00826335	0.276	0.264	1	0	Congruent	DD
ENSMUSG00000029229	Chic2	0.285473	0.0402578	0.016764	0	0.136	0.1235	1	0	0.322436	0.245874	0.00926291	0.00823868	0.154	0.14125	1	0	Congruent	UU
ENSMUSG00000029234	Tmem165	0.00222757	0.000127341	-0.0951569	0.00131546	0.13	0.163	1	0	0.616843	0.329288	-0.0135879	0.0110465	0.169	0.16825	1	0	Congruent	DD
ENSMUSG00000029238	Clock	0.000179186	0.000242597	0.0569547	0.0202379	0.369	0.2975	0.594919	0.572871	0.0332408	0.0234379	0.00223616	0.00557009	0.375	0.331	1	0	Congruent	UU
ENSMUSG00000029245	Epha5	0.0473018	0.0221089	0.0730172	0.0160519	0.634	0.738	1	0	0.396071	0.188316	0.101744	0.0132644	0.713	0.7385	1	0	Congruent	UU
ENSMUSG00000029253	Cenpc1	0.150485	0.0696309	0.0226953	0.00368504	0.261	0.2375	1	0	0.0251244	0.0438797	0.0453993	0.0159674	0.302	0.264	1	0	Congruent	UU
ENSMUSG00000029267	Mtf2	4.75895e-06	3.41012e-06	0.101229	0.00776366	0.358	0.285	0.118193	0.0846938	0.00312506	0.00529495	0.0818285	0.0249602	0.415	0.36325	0.751366	0.497268	Congruent	UU
ENSMUSG00000029270	Dipk1a	8.34217e-05	6.18342e-05	0.0861583	0.00611286	0.184	0.137	0.992974	0.00993573	0.0121682	0.0115937	0.0424981	0.00598481	0.197	0.16675	1	0	Congruent	UU
ENSMUSG00000029279	Brdt	0.00115598	0.000630546	0.0435539	0.00643623	0.18	0.14	1	0	0.13239	0.139221	0.0265862	0.014998	0.19	0.16875	1	0	Congruent	UU
ENSMUSG00000029283	Cdc7	0.000640737	0.000197313	0.0560614	0.00101054	0.108	0.076	1	0	4.00361e-07	7.83434e-07	0.0869375	0.00992622	0.115	0.06575	0.0114727	0.0224501	Congruent	UU
ENSMUSG00000029287	Tgfbr3	0.00130898	0.000762364	0.0413522	0.00332216	0.163	0.1235	1	0	0.00181912	0.0030562	0.0577568	0.0118263	0.166	0.12825	0.755587	0.488827	Congruent	UU
ENSMUSG00000029291	Rufy3	0.0675476	0.0334769	0.00177024	0.0056189	0.473	0.4275	1	0	0.271222	0.154486	0.0148285	0.0107352	0.608	0.5965	1	0	Congruent	UU
ENSMUSG00000029309	Sparcl1	0.570004	0.215648	0.0129744	0.00853302	0.108	0.1025	1	0	0.852687	0.179225	0.0265258	0.00697431	0.103	0.10175	1	0	Congruent	UU
ENSMUSG00000029319	Coq2	0.547651	0.284981	-0.0127436	0.00630766	0.105	0.1105	1	0	0.61348	0.23586	-0.00103148	0.00942699	0.117	0.1165	1	0	Congruent	DD
ENSMUSG00000029328	Hnrnpdl	0.0884352	0.00483649	0.0272606	0.00271514	0.489	0.454	1	0	4.87435e-16	5.82891e-16	0.180463	0.023595	0.516	0.391	1.39679e-11	1.67033e-11	Congruent	UU
ENSMUSG00000029348	Asphd2	6.14772e-06	5.58704e-06	0.0896734	0.00393497	0.152	0.103	0.152685	0.13876	4.50839e-08	8.68441e-08	0.093392	0.00668339	0.153	0.09775	0.00129192	0.00248861	Congruent	UU
ENSMUSG00000029359	Tesc	2.24192e-20	2.35473e-21	0.199872	0.00139713	0.26	0.1405	5.56804e-16	5.84821e-17	2.10471e-05	4.15971e-05	0.0938372	0.0151342	0.203	0.149	0.255345	0.496464	Congruent	UU
ENSMUSG00000029403	Cdkl2	0.076521	0.0641979	0.0196299	0.00770647	0.141	0.12	1	0	0.00276978	0.00441529	0.0532884	0.00874229	0.158	0.1255	1	0	Congruent	UU
ENSMUSG00000029405	G3bp2	0.0130822	0.00320731	0.0355348	0.00546542	0.253	0.2145	1	0	1.50598e-06	2.99622e-06	0.0922568	0.0197685	0.286	0.2145	0.0431554	0.0858596	Congruent	UU
ENSMUSG00000029406	Pitpnm2	6.22797e-08	7.43522e-08	0.124811	0.00751569	0.263	0.1875	0.00154678	0.00184661	1.03618e-07	2.06147e-07	0.134633	0.0183464	0.322	0.24275	0.00296929	0.00590735	Congruent	UU
ENSMUSG00000029407	Uso1	0.713884	0.255039	-0.0105255	0.0031465	0.169	0.1625	1	0	0.289888	0.223277	-0.0294763	0.00276174	0.176	0.188	1	0	Congruent	DD
ENSMUSG00000029408	Abcb9	4.69643e-06	6.30839e-06	0.0841164	0.00874827	0.164	0.1105	0.116641	0.156675	0.0022285	0.00441399	0.0594337	0.0139744	0.149	0.1105	0.712419	0.438771	Congruent	UU
ENSMUSG00000029420	Rimbp2	8.80309e-07	1.18472e-06	0.140505	0.0158704	0.349	0.2725	0.0218634	0.0294236	0.222637	0.0647316	0.00840123	0.00734617	0.372	0.35275	1	0	Congruent	UU
ENSMUSG00000029426	Scarb2	0.000150693	7.19913e-06	-0.110453	0.00136291	0.088	0.123	1	0	0.806793	0.291696	-0.024243	0.00509754	0.109	0.11	1	0	Congruent	DD
ENSMUSG00000029434	Vps33a	0.461163	0.0840253	0.0064248	0.000479276	0.129	0.121	1	0	0.00585538	0.00768659	0.0460686	0.00794795	0.142	0.11325	1	0	Congruent	UU
ENSMUSG00000029436	Mmp17	5.60664e-12	5.23816e-12	0.119994	0.000966957	0.196	0.114	1.39246e-07	1.30095e-07	0.00319822	0.00563511	0.0469964	0.00695267	0.14	0.1085	1	0	Congruent	UU
ENSMUSG00000029439	Sfswap	0.379017	0.015434	-0.00462449	0.000435306	0.196	0.182	1	0	0.518614	0.2337	-0.00746611	0.0100052	0.232	0.22075	1	0	Congruent	DD
ENSMUSG00000029447	Cct6a	5.38077e-05	5.91958e-05	0.0544368	0.00349791	0.119	0.0775	0.648395	0.497245	0.0193372	0.0348047	0.0349134	0.0129614	0.104	0.0805	1	0	Congruent	UU
ENSMUSG00000029461	Fam168a	0.108369	0.0250003	-0.043997	0.00357496	0.633	0.6865	1	0	0.260748	0.173058	-0.033223	0.0138096	0.66	0.689	1	0	Congruent	DD
ENSMUSG00000029462	Vps29	0.0059753	0.00137677	0.0367482	0.00144872	0.145	0.1135	1	0	0.00210106	0.00364735	0.0545183	0.00505362	0.145	0.11225	1	0	Congruent	UU
ENSMUSG00000029463	Fam216a	1.26631e-06	0	0.0861465	0	0.15	0.099	0.03145	0	0.00168386	0.000756947	0.0379543	0.00388968	0.132	0.1025	1	0	Congruent	UU
ENSMUSG00000029467	Atp2a2	5.27383e-08	4.08717e-08	0.158024	0.00382351	0.588	0.5275	0.00130981	0.00101509	0.00503347	0.00526421	0.0751997	0.00426189	0.558	0.52625	1	0	Congruent	UU
ENSMUSG00000029469	Ift81	0.0418255	0.00128721	0.0402387	0.000978082	0.123	0.102	1	0	0.0492061	0.052821	0.0212039	0.00959838	0.131	0.10975	1	0	Congruent	UU
ENSMUSG00000029471	Camkk2	2.34045e-10	2.84739e-10	0.145079	0.00727519	0.337	0.2405	5.81275e-06	7.07178e-06	4.54072e-07	9.07565e-07	0.129414	0.012569	0.334	0.2565	0.0130119	0.0260072	Congruent	UU
ENSMUSG00000029472	Anapc5	0.000103501	4.15826e-05	0.0588697	0.00173419	0.246	0.19	1	0	0.000378509	0.000601462	0.0692602	0.0164398	0.249	0.2005	0.702378	0.348313	Congruent	UU
ENSMUSG00000029474	Rnf34	0.00908655	0.00346537	0.0333131	0.00250834	0.107	0.081	1	0	0.0612633	0.0819797	0.0288609	0.0121063	0.117	0.096	1	0	Congruent	UU
ENSMUSG00000029478	Ncor2	5.47425e-05	1.06552e-05	0.0639267	0.00132687	0.217	0.1635	1	0	0.0133604	0.0109914	0.0328208	0.00875823	0.201	0.16925	1	0	Congruent	UU
ENSMUSG00000029486	Mrpl1	0.00646987	0.0072647	0.0450661	0.00543549	0.129	0.0985	1	0	0.486324	0.111233	0.00305607	0.00325101	0.149	0.14075	1	0	Congruent	UU
ENSMUSG00000029501	Ankle2	0.561002	0.0312608	6.6246e-07	0.00195523	0.108	0.101	1	0	0.110182	0.0944703	0.0219446	0.00734105	0.133	0.116	1	0	Congruent	UU
ENSMUSG00000029502	Golga3	0.337311	0.025956	0.00488054	0.0019751	0.1	0.0905	1	0	0.108741	0.0984724	0.0206599	0.00488477	0.104	0.08925	1	0	Congruent	UU
ENSMUSG00000029516	Cit	1.80826e-11	1.44313e-11	0.192549	0.00782412	0.559	0.459	4.491e-07	3.58415e-07	0.00171063	0.00145153	0.098822	0.0148652	0.594	0.56125	0.831775	0.33645	Congruent	UU
ENSMUSG00000029538	Srsf9	0.00573247	0.00154035	0.0474748	0.00245521	0.131	0.1015	1	0	4.71314e-05	5.50898e-05	0.0660593	0.0147262	0.146	0.10175	0.519587	0.555652	Congruent	UU
ENSMUSG00000029544	Cabp1	8.63778e-07	1.0447e-06	0.0855531	0.00575268	0.183	0.1235	0.0214528	0.0259461	5.84233e-05	5.27377e-05	0.064566	0.00787355	0.181	0.137	0.759527	0.480945	Congruent	UU
ENSMUSG00000029563	Foxp2	3.86392e-10	3.69187e-10	0.203364	0.000911083	0.634	0.5955	9.59643e-06	9.16912e-06	0.000471732	0.000515492	0.207104	0.0258864	0.671	0.672	0.873128	0.253744	Congruent	UU
ENSMUSG00000029571	Tmem106b	0.00200767	0.00167081	0.0402884	0.00577711	0.14	0.105	1	0	0.355008	0.345569	0.00766695	0.00926309	0.138	0.12625	1	0	Congruent	UU
ENSMUSG00000029576	Radil	0.00232544	0.000181854	0.0642043	0.000481084	0.159	0.126	1	0	4.04893e-07	6.70767e-07	0.0786124	0.00848866	0.158	0.106	0.0116026	0.0192215	Congruent	UU
ENSMUSG00000029580	Actb	5.39658e-07	4.57023e-07	0.107926	0.00498359	0.417	0.323	0.0134029	0.0113506	1.9806e-15	3.27566e-15	0.233463	0.0200794	0.453	0.3385	5.67561e-11	9.38673e-11	Congruent	UU
ENSMUSG00000029581	Fscn1	0.0424194	0.0122904	0.00526216	0.000497023	0.1	0.079	1	0	0.00137594	0.00154743	0.0436631	0.0103815	0.105	0.07475	0.787757	0.424485	Congruent	UU
ENSMUSG00000029614	Rpl6	8.51226e-05	6.22111e-05	0.0550306	0.00476803	0.238	0.181	1	0	0.0109427	0.0210492	0.0395551	0.0188882	0.236	0.1945	1	0	Congruent	UU
ENSMUSG00000029616	Erp29	0.177989	0.130384	0.00522718	0.00739235	0.157	0.1385	1	0	0.0837483	0.112297	0.0168086	0.00862075	0.143	0.12175	1	0	Congruent	UU
ENSMUSG00000029621	Arpc1a	0.00339283	0.000984769	0.0369453	0.000912468	0.19	0.1515	1	0	0.00314068	0.00378869	0.0443257	0.00467194	0.202	0.16475	1	0	Congruent	UU
ENSMUSG00000029629	Phf14	0.58998	0.00520499	-0.0209114	0.00246546	0.726	0.7805	1	0	0.31366	0.138427	-0.032312	0.00629952	0.806	0.82375	1	0	Congruent	DD
ENSMUSG00000029632	Ndufa4	4.27647e-14	2.31206e-14	0.17069	0.00265086	0.265	0.1635	1.06211e-09	5.74222e-10	5.71693e-07	1.08317e-06	0.107253	0.0146901	0.223	0.158	0.0163824	0.0310394	Congruent	UU
ENSMUSG00000029635	Cdk8	0.00049177	0.00048037	0.0951841	0.0101507	0.555	0.5	1	0	0.0128405	0.0242265	0.0750782	0.0150324	0.572	0.53575	1	0	Congruent	UU
ENSMUSG00000029636	Wasf3	0.558464	0.128165	0.00249763	0.00176724	0.182	0.173	1	0	0.0251612	0.0230758	0.0419187	0.0101257	0.212	0.18375	1	0	Congruent	UU
ENSMUSG00000029647	Pan3	1.87784e-09	5.63569e-10	-0.194431	0.00155905	0.518	0.6095	4.66382e-05	1.39968e-05	0.000203106	0.000162984	-0.0826414	0.0140373	0.622	0.6755	0.833526	0.332947	Congruent	DD
ENSMUSG00000029651	Mtus2	7.75713e-05	8.15332e-05	0.0715526	0.0120239	0.355	0.2885	0.747349	0.357302	0.0872922	0.106556	0.0237553	0.0138098	0.361	0.32775	1	0	Congruent	UU
ENSMUSG00000029657	Hsph1	7.35593e-26	3.32627e-26	0.219859	0.00136717	0.295	0.151	1.82692e-21	8.26113e-22	1.15408e-06	1.51991e-06	0.0709625	0.00886748	0.225	0.165	0.0330713	0.0435546	Congruent	UU
ENSMUSG00000029673	Auts2	0.000196344	8.21511e-05	0.0766536	0.000690099	0.995	0.9935	1	0	0.424002	0.323437	0.0234039	0.0220363	0.994	0.99825	1	0	Congruent	UU
ENSMUSG00000029676	Pot1a	0.00427749	0.000805382	-0.0635655	0.00579901	0.079	0.1045	1	0	0.59594	0.311097	-0.00266441	0.00509308	0.104	0.0985	1	0	Congruent	DD
ENSMUSG00000029684	Wasl	0.0438568	0.00666193	0.0266884	0.00299601	0.233	0.2045	1	0	0.0796745	0.134004	0.0323473	0.0220531	0.254	0.22275	1	0	Congruent	UU
ENSMUSG00000029686	Cul1	0.602199	0.277125	-0.0289139	0.00854611	0.302	0.2885	1	0	0.326722	0.29422	-0.00301831	0.0205255	0.336	0.31425	1	0	Congruent	DD
ENSMUSG00000029701	Rbm28	9.72084e-05	0.00010132	0.0755685	0.00573114	0.293	0.2335	0.817461	0.258149	6.41156e-06	9.7814e-06	0.0917465	0.0144146	0.332	0.26775	0.18373	0.280296	Congruent	UU
ENSMUSG00000029705	Cux1	0.076395	0.0366919	0.00760876	0.00718411	0.355	0.3155	1	0	0.216077	0.119857	0.0158817	0.0202001	0.395	0.37075	1	0	Congruent	UU
ENSMUSG00000029712	Actl6b	3.61061e-09	3.18528e-09	0.104156	0.000478826	0.196	0.1245	8.96732e-05	7.91096e-05	1.83469e-13	1.45879e-13	0.129374	0.00154482	0.205	0.12625	5.25748e-09	4.18031e-09	Congruent	UU
ENSMUSG00000029713	Gnb2	2.17523e-19	2.97343e-19	0.219721	0.00800113	0.344	0.21	5.40239e-15	7.38481e-15	1.29124e-20	1.62127e-20	0.204815	0.0176814	0.297	0.17675	3.70018e-16	4.6459e-16	Congruent	UU
ENSMUSG00000029722	Agfg2	0.0406819	0.00425414	0.0332946	0.000992354	0.113	0.093	1	0	0.0327256	0.0547717	0.0272579	0.00756589	0.117	0.09475	1	0	Congruent	UU
ENSMUSG00000029763	Exoc4	0.0042873	0.00186522	-0.075626	0.00474443	0.823	0.9015	1	0	0.0385356	0.0281542	-0.0702925	0.00909504	0.897	0.922	1	0	Congruent	DD
ENSMUSG00000029772	Ahcyl2	0.543997	0.0745328	0.0468331	0.00328371	0.61	0.643	1	0	0.0811316	0.108535	0.0590038	0.0173472	0.646	0.6385	1	0	Congruent	UU
ENSMUSG00000029777	Gars	0.02255	0.00666238	0.035406	0.00194962	0.134	0.109	1	0	0.255578	0.142264	0.00824336	0.00648533	0.131	0.118	1	0	Congruent	UU
ENSMUSG00000029787	Avl9	0.327636	0.179642	0.00791741	0.00280644	0.145	0.1325	1	0	0.0633546	0.0278303	0.0202691	0.00339537	0.191	0.16825	1	0	Congruent	UU
ENSMUSG00000029804	Herc3	0.0146155	0.00302891	0.0401997	0.000900785	0.195	0.163	1	0	0.514535	0.383657	0.00359873	0.0258466	0.196	0.195	1	0	Congruent	UU
ENSMUSG00000029817	Tra2a	3.04739e-05	8.47328e-06	-0.161322	0	0.385	0.435	0.756849	0.210442	0.668747	0.137836	-0.017713	0.0102565	0.582	0.59325	1	0	Congruent	DD
ENSMUSG00000029821	Gsdme	1.027e-05	7.94917e-06	0.0870482	0.000906388	0.218	0.16	0.255066	0.197426	0.344491	0.395857	0.0194854	0.0202053	0.241	0.22575	1	0	Congruent	UU
ENSMUSG00000029823	Luc7l2	8.0617e-11	6.23757e-11	-0.217554	0.0013986	0.884	0.9455	2.0022e-06	1.54916e-06	0.520509	0.258393	-0.0322052	0.0146603	0.929	0.94175	1	0	Congruent	DD
ENSMUSG00000029833	Trim24	0.827911	0.144712	-0.0365894	0.00768896	0.147	0.1465	1	0	0.47225	0.345139	-0.0363393	0.0200939	0.156	0.15775	1	0	Congruent	DD
ENSMUSG00000029836	Cbx3	0.570916	0.344348	0.00821033	0.00871919	0.114	0.107	1	0	0.628913	0.248717	0.00776096	0.00986532	0.135	0.1305	1	0	Congruent	UU
ENSMUSG00000029837	1700111E14Rik	2.33507e-08	3.22741e-09	0.111557	0.00182249	0.228	0.156	0.000579937	8.01559e-05	0.0353525	0.047084	0.0597515	0.0148719	0.245	0.21725	1	0	Congruent	UU
ENSMUSG00000029838	Ptn	0.0432913	0.017075	-0.151311	0.00450393	0.387	0.3915	1	0	1.34781e-06	2.69547e-06	-0.241303	0.0348873	0.345	0.41525	0.0386229	0.0772413	Congruent	DD
ENSMUSG00000029840	Mtpn	0.0298186	0.0142625	0.0308312	0.00100161	0.106	0.085	1	0	0.0369211	0.0439143	0.0219752	0.00911422	0.126	0.1035	1	0	Congruent	UU
ENSMUSG00000029918	Mrps33	0.000714245	8.36767e-05	0.0595848	0	0.137	0.1015	1	0	0.0418381	0.0704299	0.0400352	0.0108857	0.13	0.10625	1	0	Congruent	UU
ENSMUSG00000029922	Mkrn1	0.00434892	6.65205e-05	0.0469623	0.000485665	0.14	0.109	1	0	0.000353312	0.000389502	0.0656796	0.00905776	0.161	0.12225	0.771986	0.456028	Congruent	UU
ENSMUSG00000029992	Gfpt1	0.0197852	0.00537478	0.0314152	0.000955634	0.135	0.1095	1	0	0.0982639	0.135062	0.0205189	0.00912889	0.136	0.11625	1	0	Congruent	UU
ENSMUSG00000029999	Tgfa	4.44344e-09	1.60762e-09	0.125375	0.00176418	0.255	0.176	0.000110357	3.99268e-05	0.157544	0.220992	0.0238974	0.0166155	0.218	0.19425	1	0	Congruent	UU
ENSMUSG00000030000	Add2	5.0603e-07	1.11837e-07	0.115479	0.00326968	0.318	0.243	0.0125678	0.00277757	0.000129757	0.000226135	0.0876455	0.0143031	0.349	0.291	0.612797	0.45677	Congruent	UU
ENSMUSG00000030007	Cct7	0.000151706	0.000148762	0.0616687	0.00639897	0.137	0.096	1	0	2.90222e-05	4.57714e-05	0.0582638	0.00703698	0.142	0.09975	0.384029	0.428469	Congruent	UU
ENSMUSG00000030016	Zfp638	0.00449429	0.00376415	-0.0985471	0.00616687	0.651	0.715	1	0	0.00331827	0.00252651	-0.09446	0.0139052	0.728	0.7615	1	0	Congruent	DD
ENSMUSG00000030020	Prickle2	2.26931e-33	3.1812e-33	-0.571438	0.0144145	0.555	0.7095	5.63607e-29	7.90083e-29	1.19096e-16	2.30388e-16	-0.416377	0.0351969	0.65	0.72975	3.41281e-12	6.60201e-12	Congruent	DD
ENSMUSG00000030057	Cnbp	0.566256	0.163305	0.00271375	0.00192026	0.121	0.114	1	0	0.136431	0.0649604	0.0143553	0.00705996	0.135	0.1195	1	0	Congruent	UU
ENSMUSG00000030058	Copg1	2.15525e-05	2.76313e-05	0.0740778	0.00722993	0.17	0.1185	0.525013	0.671734	0.00438179	0.00492922	0.0410331	0.0122751	0.15	0.11725	0.99501	0.00998038	Congruent	UU
ENSMUSG00000030064	Frmd4b	2.78843e-08	3.72098e-09	-0.311986	0.00336466	0.368	0.424	0.000692534	9.24143e-05	4.75947e-09	8.84213e-09	-0.235974	0.0230543	0.398	0.464	0.000136388	0.00025338	Congruent	DD
ENSMUSG00000030067	Foxp1	1.4217e-17	1.97033e-17	0.265098	0.0140528	0.864	0.8415	3.53094e-13	4.89351e-13	0.000820182	0.000684978	0.101023	0.0293333	0.847	0.856	0.76226	0.47548	Congruent	UU
ENSMUSG00000030068	Gm20696	0.00504674	0.00173285	0.0402706	0.00258591	0.245	0.203	1	0	0.00844916	0.00813373	0.0523438	0.0102403	0.248	0.21375	1	0	Congruent	UU
ENSMUSG00000030077	Chl1	0.00803982	0.00761657	0.00322265	0.0207972	0.269	0.222	1	0	0.231572	0.273599	0.0199254	0.0198565	0.299	0.27625	1	0	Congruent	UU
ENSMUSG00000030091	Nup210	0.10118	0.0251576	0.0248841	0.00149984	0.102	0.0865	1	0	0.00425387	0.000517733	0.0313702	0.0024724	0.109	0.08425	1	0	Congruent	UU
ENSMUSG00000030092	Cntn6	4.78251e-07	1.36654e-09	0.10124	0.00309707	0.394	0.3075	0.0118778	3.39393e-05	0.0258426	0.0393602	0.0551498	0.0145341	0.401	0.3575	1	0	Congruent	UU
ENSMUSG00000030096	Slc6a6	0.000562576	0.00046609	0.0785548	0.00855234	0.362	0.3065	1	0	0.00328088	0.00328925	0.0432032	0.00587757	0.383	0.33275	1	0	Congruent	UU
ENSMUSG00000030101	Sumf1	0.132934	0.0340117	0.0201697	0.00297128	0.101	0.086	1	0	0.118	0.159386	0.0254954	0.0129752	0.105	0.0885	1	0	Congruent	UU
ENSMUSG00000030102	Itpr1	1.48753e-31	1.99811e-31	0.379019	0.00997119	0.869	0.8345	3.69444e-27	4.96252e-27	0.00200668	0.00275679	0.0802037	0.0027621	0.85	0.8665	1	0	Congruent	UU
ENSMUSG00000030120	Mlf2	3.20834e-12	1.5398e-12	0.132652	0.00190769	0.207	0.1225	7.96823e-08	3.82425e-08	2.14389e-05	4.25824e-05	0.085032	0.0115934	0.183	0.129	0.25318	0.497911	Congruent	UU
ENSMUSG00000030122	Ptms	2.35565e-16	2.46212e-16	0.168659	0.000947645	0.231	0.1285	5.85049e-12	6.11491e-12	4.96759e-11	5.8505e-11	0.114735	0.0116035	0.206	0.1305	1.42351e-06	1.67652e-06	Congruent	UU
ENSMUSG00000030126	Tmcc1	1.43659e-14	1.25224e-14	-0.268605	0.00445314	0.704	0.817	3.5679e-10	3.11006e-10	4.40569e-07	5.78153e-07	-0.17585	0.0211197	0.774	0.8235	0.012625	0.0165675	Congruent	DD
ENSMUSG00000030134	Rasgef1a	5.81849e-11	7.4267e-11	0.192656	0.00779044	0.702	0.6745	1.44508e-06	1.84449e-06	1.58668e-05	1.08481e-05	0.10838	0.00487787	0.673	0.64375	0.45468	0.310864	Congruent	UU
ENSMUSG00000030138	Bms1	0.0120532	0.0111116	0.0411845	0.00912345	0.148	0.1185	1	0	0.1281	0.0661293	0.0204814	0.00559648	0.142	0.12625	1	0	Congruent	UU
ENSMUSG00000030161	Gabarapl1	2.61961e-06	3.39204e-06	0.106499	0.0105466	0.182	0.126	0.0650605	0.0842446	3.65152e-09	2.33638e-09	0.0920179	0.00164651	0.175	0.115	0.000104638	6.69513e-05	Congruent	UU
ENSMUSG00000030168	Adipor2	5.63293e-18	6.19911e-19	-0.467355	0.00948061	0.117	0.214	1.399e-13	1.53961e-14	2.31265e-05	4.39123e-05	-0.212008	0.0217095	0.161	0.21075	0.275453	0.48511	Congruent	DD
ENSMUSG00000030172	Erc1	0.0265022	0.00714438	0.0181281	0.000363362	0.337	0.2965	1	0	0.640791	0.266931	0.00748705	0.0203772	0.521	0.52875	1	0	Congruent	UU
ENSMUSG00000030199	Etv6	0.0207344	0.00357107	-0.0812119	0.000859065	0.15	0.1765	1	0	0.40548	0.297801	-0.0424051	0.017161	0.178	0.18575	1	0	Congruent	DD
ENSMUSG00000030201	Lrp6	0.019171	0.00565295	0.0327524	0.00242314	0.288	0.25	1	0	0.00907487	0.00862981	0.0414485	0.00700531	0.327	0.287	1	0	Congruent	UU
ENSMUSG00000030207	Fam234b	0.0211158	0.012198	0.0274609	0.000496297	0.113	0.089	1	0	0.111841	0.144273	0.025452	0.0111397	0.119	0.10125	1	0	Congruent	UU
ENSMUSG00000030209	Grin2b	5.35672e-35	3.57681e-35	0.307982	0.00344878	0.984	0.9695	1.33039e-30	8.88335e-31	1.37538e-12	1.58834e-12	0.197248	0.0284562	0.987	0.987	3.94128e-08	4.55156e-08	Congruent	UU
ENSMUSG00000030213	Atf7ip	0.247647	0.00157672	-0.114368	0.000697293	0.308	0.309	1	0	0.457149	0.301453	-0.0653842	0.0140954	0.362	0.3605	1	0	Congruent	DD
ENSMUSG00000030222	Rerg	4.22483e-06	4.08249e-06	0.074464	0.00689752	0.193	0.135	0.104928	0.101393	0.00180127	0.0023214	0.067447	0.0187037	0.214	0.17325	0.783074	0.433853	Congruent	UU
ENSMUSG00000030223	Ptpro	0.00657395	0.00206587	0.0522056	0.000864159	0.211	0.174	1	0	0.24251	0.345083	0.0330529	0.0206491	0.231	0.2145	1	0	Congruent	UU
ENSMUSG00000030226	Lmo3	3.76505e-10	4.52073e-10	0.147691	0.00566141	0.273	0.1865	9.35088e-06	1.12277e-05	0.000143535	0.00017254	0.0737011	0.0092549	0.309	0.253	0.655982	0.418442	Congruent	UU
ENSMUSG00000030231	Plekha5	1.63251e-12	1.68994e-12	0.168416	0.00391282	0.906	0.9165	4.05451e-08	4.19712e-08	0.00401146	0.00261238	0.0596392	0.0100988	0.921	0.9305	1	0	Congruent	UU
ENSMUSG00000030246	Ldhb	2.17341e-07	1.88676e-07	0.135883	0.00398579	0.248	0.181	0.00539789	0.00468595	2.86387e-09	3.44166e-09	0.10816	0.00583803	0.265	0.19025	8.20671e-05	9.86242e-05	Congruent	UU
ENSMUSG00000030256	Bhlhe41	0.00722166	0.0050584	0.0292888	0.00298869	0.103	0.077	1	0	0.117032	0.0781971	0.0248377	0.0196518	0.14	0.11925	1	0	Congruent	UU
ENSMUSG00000030257	Srgap3	0.00544287	0.000153726	-0.0561969	0.00272546	0.546	0.6105	1	0	0.610605	0.136389	-0.0216409	0.00963209	0.612	0.62225	1	0	Congruent	DD
ENSMUSG00000030259	Rassf8	0.200889	0.124969	-0.068231	0.0046202	0.114	0.124	1	0	0.154878	0.265538	-0.0535765	0.0117013	0.144	0.1615	1	0	Congruent	DD
ENSMUSG00000030279	C2cd5	0.510629	0.185043	0.0389715	0.00620619	0.664	0.6965	1	0	0.264178	0.156307	0.0374918	0.00811599	0.73	0.74725	1	0	Congruent	UU
ENSMUSG00000030284	Creld1	0.00117448	0.0010516	0.0442875	0.00302862	0.11	0.0785	1	0	0.000338637	0.000374945	0.06039	0.00642308	0.126	0.0915	0.771828	0.456344	Congruent	UU
ENSMUSG00000030286	Emc3	0.0329014	0.0180159	0.0314251	0.00293003	0.122	0.0995	1	0	0.0146883	0.013769	0.0285807	0.0049166	0.117	0.094	1	0	Congruent	UU
ENSMUSG00000030302	Atp2b2	1.14577e-22	1.5511e-22	0.282362	0.00875662	0.824	0.8145	2.84562e-18	3.85232e-18	0.00338397	0.00602492	0.0757565	0.0114798	0.834	0.8465	1	0	Congruent	UU
ENSMUSG00000030303	Far2	0.31232	0.00809078	0.0227407	0.000926137	0.162	0.1495	1	0	0.400303	0.0809904	0.00330285	0.00307789	0.188	0.17675	1	0	Congruent	UU
ENSMUSG00000030304	Ergic2	0.0477314	0.0257113	0.0149643	0.00647123	0.165	0.14	1	0	0.0325314	0.0321448	0.0324539	0.00422228	0.174	0.14975	1	0	Congruent	UU
ENSMUSG00000030306	Tmtc1	8.3342e-11	5.9276e-11	0.15312	0	0.387	0.2805	2.06988e-06	1.47218e-06	0.0111268	0.0128411	0.0629471	0.0318305	0.388	0.33525	0.627972	0.436716	Congruent	UU
ENSMUSG00000030310	Slc6a1	0.0118233	0.0117364	0.0331281	0.0103279	0.362	0.313	1	0	1.80807e-14	2.78624e-14	0.188814	0.0150044	0.39	0.2825	5.18121e-10	7.98424e-10	Congruent	UU
ENSMUSG00000030315	Vgll4	0.0042134	0.00459674	-0.105711	0.00673658	0.106	0.1345	1	0	0.25496	0.25928	-0.0661364	0.0161098	0.121	0.132	1	0	Congruent	DD
ENSMUSG00000030327	Necap1	0.0173223	0.0110294	0.0354721	0.00398298	0.111	0.0875	1	0	7.32503e-07	3.69184e-07	0.0727071	0.00325567	0.121	0.07875	0.0209906	0.0105793	Congruent	UU
ENSMUSG00000030350	Prmt8	0.000652848	0.000557695	0.0843548	0.00189002	0.178	0.1385	1	0	0.0051631	0.00798208	0.0514464	0.010703	0.198	0.16325	1	0	Congruent	UU
ENSMUSG00000030376	Slc8a2	4.57765e-13	5.80344e-13	0.13801	0.00391985	0.195	0.1095	1.1369e-08	1.44134e-08	0.0170602	0.0297282	0.0471156	0.01688	0.15	0.116	0.599877	0.483216	Congruent	UU
ENSMUSG00000030411	Nova2	0.0234741	0.00989748	0.0306391	0.00329609	0.163	0.136	1	0	1.2888e-08	1.35792e-08	0.0851821	0.00347028	0.192	0.13075	0.000369318	0.000389124	Congruent	UU
ENSMUSG00000030428	Ttyh1	2.5627e-24	3.56747e-24	0.288804	0.00814044	0.456	0.2945	6.36472e-20	8.86017e-20	1.15447e-18	1.15437e-18	0.238639	0.0113648	0.418	0.3005	3.30825e-14	3.30796e-14	Congruent	UU
ENSMUSG00000030432	Rpl28	2.9354e-10	4.00106e-11	0.120951	0.00236636	0.19	0.115	7.29037e-06	9.93704e-07	0.000128632	0.00024735	0.0643066	0.00923333	0.157	0.11225	0.357217	0.457393	Congruent	UU
ENSMUSG00000030435	U2af2	0.075191	0.0172126	0.0252186	0.00189353	0.149	0.128	1	0	0.00870347	0.0100721	0.0387976	0.0107485	0.134	0.10475	1	0	Congruent	UU
ENSMUSG00000030451	Herc2	0.0147141	0.00705966	-0.0715238	0.00187206	0.581	0.631	1	0	0.022226	0.0248251	-0.0574814	0.0119095	0.663	0.70375	1	0	Congruent	DD
ENSMUSG00000030452	Nipa2	0.412532	0.126602	0.0208496	0.0047894	0.133	0.1235	1	0	0.345499	0.211591	0.0105038	0.00762923	0.147	0.13625	1	0	Congruent	UU
ENSMUSG00000030465	Psd3	0.0954256	0.024611	-0.0231346	0.00541059	0.607	0.669	1	0	0.29218	0.208596	-0.0598664	0.0175873	0.704	0.72	1	0	Congruent	DD
ENSMUSG00000030471	Zdhhc13	0.434971	0.0916298	0.00938164	0.0024647	0.108	0.1	1	0	0.00121757	0.000173993	0.0515306	0.00115671	0.137	0.10675	1	0	Congruent	UU
ENSMUSG00000030516	Tjp1	0.00112291	0.00101566	-0.0888534	0.00987207	0.74	0.834	1	0	0.00315488	0.00301385	-0.0838331	0.00761841	0.808	0.84825	1	0	Congruent	DD
ENSMUSG00000030518	Fam189a1	0.303015	0.194498	-0.01461	0.0114385	0.438	0.47	1	0	0.0830527	0.155223	-0.0488587	0.0210178	0.567	0.60575	1	0	Congruent	DD
ENSMUSG00000030556	Lrrc28	0.577356	0.112153	-0.0407437	0.00254399	0.189	0.1925	1	0	0.337038	0.270831	-0.0170535	0.0161412	0.236	0.22125	1	0	Congruent	DD
ENSMUSG00000030557	Mef2a	0.794025	0.159062	-0.067285	0.0018755	0.532	0.5375	1	0	0.0216369	0.0150636	-0.0819173	0.0219241	0.639	0.6735	1	0	Congruent	DD
ENSMUSG00000030584	Dpf1	0.000264691	4.41392e-06	0.0490532	0.000507658	0.107	0.073	1	0	8.09779e-07	9.25911e-07	0.0620659	0.00763498	0.116	0.07125	0.023205	0.0265329	Congruent	UU
ENSMUSG00000030592	Ryr1	1.3529e-14	1.22971e-14	0.198094	0.000447528	0.258	0.1575	3.36007e-10	3.05411e-10	8.94499e-06	1.59109e-05	0.128039	0.0178214	0.216	0.16	0.256328	0.455942	Congruent	UU
ENSMUSG00000030616	Sytl2	1.89796e-15	1.71274e-15	-0.260603	0.00778736	0.074	0.156	4.71377e-11	4.25376e-11	8.29934e-16	1.52478e-15	-0.240945	0.0265513	0.068	0.143	2.37826e-11	4.36941e-11	Congruent	DD
ENSMUSG00000030629	Zfand6	2.98781e-05	1.46413e-05	-0.144797	0.00617894	0.135	0.1805	0.742052	0.363632	0.278515	0.184366	-0.0812398	0.0191616	0.187	0.19525	1	0	Congruent	DD
ENSMUSG00000030643	Rab30	0.0298304	0.0097453	0.0383217	0.000819718	0.269	0.235	1	0	0.0590955	0.0934304	0.027731	0.0166164	0.32	0.28275	1	0	Congruent	UU
ENSMUSG00000030647	Ndufc2	1.04157e-09	4.7838e-10	0.118897	0.00476256	0.181	0.109	2.58685e-05	1.1881e-05	0.030311	0.0205983	0.0454461	0.0147705	0.132	0.10775	0.873501	0.252999	Congruent	UU
ENSMUSG00000030654	Arl6ip1	0.0138779	0.000618695	0.045311	0.00185987	0.152	0.124	1	0	0.437145	0.355503	0.0175539	0.0100856	0.139	0.13	1	0	Congruent	UU
ENSMUSG00000030657	Xylt1	0.204519	0.0433227	-0.122087	0.00099932	0.158	0.1715	1	0	0.68138	0.0492237	-0.113586	0.0300282	0.169	0.16675	1	0	Congruent	DD
ENSMUSG00000030659	Nucb2	0.0657833	0.00148208	0.0268775	0.00196748	0.116	0.098	1	0	0.00212223	0.00374946	0.0461956	0.00855801	0.123	0.09075	0.835951	0.328098	Congruent	UU
ENSMUSG00000030671	Pde3b	0.902735	0.0651935	-0.141286	0.0064077	0.2	0.195	1	0	0.52799	0.233266	-0.0195396	0.0104176	0.228	0.217	1	0	Congruent	DD
ENSMUSG00000030678	Maz	0.00414017	0.00119734	0.0453267	0.00394639	0.123	0.0935	1	0	1.81111e-07	3.56048e-07	0.0750882	0.0105999	0.115	0.066	0.00518991	0.0102029	Congruent	UU
ENSMUSG00000030682	Cdipt	0.000109194	0.000129022	0.0633407	0.00597157	0.127	0.0865	0.723041	0.39168	3.8085e-05	7.44989e-05	0.066525	0.00809127	0.108	0.0685	0.267999	0.488466	Congruent	UU
ENSMUSG00000030683	Sez6l2	0.768865	0.147639	-0.111105	0.0146631	0.262	0.249	1	0	0.56364	0.239292	-0.0101345	0.00739804	0.257	0.24375	1	0	Congruent	DD
ENSMUSG00000030691	Fchsd2	0.0013104	0.00151171	0.0212842	0.00291552	0.469	0.396	1	0	0.0355136	0.0333087	0.0316653	0.0176259	0.539	0.511	1	0	Congruent	UU
ENSMUSG00000030695	Aldoa	3.69927e-25	4.43466e-25	0.262746	0.00287306	0.37	0.214	9.18751e-21	1.10139e-20	9.33181e-34	1.86583e-33	0.299197	0.0153897	0.389	0.22325	2.67412e-29	5.34671e-29	Congruent	UU
ENSMUSG00000030704	Rab6a	0.00105438	0.000609747	0.0646226	0.00168409	0.246	0.199	1	0	0.000982918	0.000934014	0.0793927	0.00952551	0.26	0.21825	1	0	Congruent	UU
ENSMUSG00000030718	Ppme1	0.000525887	0.000571895	0.0637346	0.00983921	0.221	0.174	1	0	0.00154942	0.0022387	0.0688103	0.0083572	0.245	0.2045	1	0	Congruent	UU
ENSMUSG00000030729	Pgm2l1	0.0131429	0.00515514	0.0436479	0	0.112	0.088	1	0	8.47906e-06	1.26866e-05	0.0774031	0.00970251	0.153	0.108	0.242976	0.363546	Congruent	UU
ENSMUSG00000030738	Eif3c	9.96609e-05	0.000102836	0.0633253	0.00660592	0.169	0.1215	0.834602	0.233908	0.0194469	0.0217621	0.0307871	0.0104072	0.164	0.13575	1	0	Congruent	UU
ENSMUSG00000030741	Spns1	0.146546	0.0482988	0.018607	0.000980903	0.116	0.1005	1	0	0.00129113	0.0014698	0.0456576	0.00979028	0.114	0.083	0.832154	0.335693	Congruent	UU
ENSMUSG00000030747	Dgat2	7.65521e-09	8.79474e-09	0.0947675	0.00443647	0.158	0.094	0.000190125	0.000218426	1.62583e-06	1.82392e-06	0.0767342	0.0088145	0.151	0.102	0.0465897	0.0522664	Congruent	UU
ENSMUSG00000030751	Psma1	0.222882	0.162192	0.0205831	0.00945018	0.147	0.1315	1	0	0.00285382	0.00301283	0.0477743	0.0155692	0.17	0.13525	0.866953	0.266095	Congruent	UU
ENSMUSG00000030754	Copb1	0.0340558	0.00159857	0.03338	0.0014185	0.154	0.129	1	0	0.0105306	0.0180214	0.0509663	0.00742507	0.169	0.139	1	0	Congruent	UU
ENSMUSG00000030757	Zkscan2	0.176144	0.109841	0.027557	0.00534233	0.128	0.1135	1	0	0.142127	0.121247	0.0238933	0.00739152	0.136	0.12025	1	0	Congruent	UU
ENSMUSG00000030763	Lcmt1	0.000740568	9.77099e-05	0.0587412	0.000490098	0.144	0.1075	1	0	0.00144489	0.00112812	0.0502672	0.00629682	0.151	0.11825	1	0	Congruent	UU
ENSMUSG00000030774	Pak1	1.61161e-14	2.17246e-14	-0.428542	0.00621956	0.2	0.297	4.0026e-10	5.39552e-10	1.1827e-11	2.1305e-11	-0.339502	0.039277	0.243	0.325	3.38913e-07	6.10516e-07	Congruent	DD
ENSMUSG00000030779	Rbbp6	0.00621243	0.000308888	0.0328159	0.00636346	0.298	0.2525	1	0	0.00439721	0.0075814	0.0586114	0.025569	0.328	0.276	0.752359	0.495282	Congruent	UU
ENSMUSG00000030795	Fus	0.634884	0.0291122	0.00247401	0.0040359	0.602	0.608	1	0	0.492995	0.200299	0.00623308	0.0139292	0.684	0.687	1	0	Congruent	UU
ENSMUSG00000030806	Stx1b	1.33871e-05	1.84913e-05	0.0717485	0.00761112	0.12	0.075	0.332483	0.45925	0.000184565	0.000292182	0.0469032	0.00580731	0.109	0.07525	0.699797	0.356308	Congruent	UU
ENSMUSG00000030811	Fbxl19	0.0164343	0.0135188	0.039423	0.00693975	0.116	0.091	1	0	4.54026e-07	7.74888e-07	0.0686651	0.00607182	0.135	0.08525	0.0130106	0.0222052	Congruent	UU
ENSMUSG00000030815	Phkg2	0.0107985	0.0105835	0.0358917	0.00249484	0.107	0.0815	1	0	0.060082	0.115717	0.0419844	0.0150928	0.113	0.08875	1	0	Congruent	UU
ENSMUSG00000030822	Prr14	0.513825	0.182196	0.00169513	0.00430944	0.125	0.117	1	0	0.130394	0.105613	0.0282389	0.00348666	0.136	0.1205	1	0	Congruent	UU
ENSMUSG00000030839	Sergef	0.0319495	0.021381	0.0367955	0.00267988	0.196	0.1675	1	0	0.143725	0.152847	0.0294605	0.0130244	0.214	0.194	1	0	Congruent	UU
ENSMUSG00000030849	Fgfr2	9.58053e-12	5.67906e-12	-0.294159	0.00548071	0.645	0.747	2.37942e-07	1.41045e-07	0.000420664	0.000512931	-0.155542	0.0150442	0.686	0.72725	0.800128	0.23851	Congruent	DD
ENSMUSG00000030854	Ptpn5	4.44763e-19	8.55622e-20	0.262714	0.00300242	0.668	0.576	1.10461e-14	2.12502e-15	4.43452e-22	7.83829e-22	0.321244	0.0178221	0.646	0.5465	1.27075e-17	2.24614e-17	Congruent	UU
ENSMUSG00000030869	Ndufab1	1.1517e-05	6.37303e-06	0.0570969	0.00198471	0.127	0.0815	0.286037	0.158281	0.00231653	0.0017928	0.0390834	0.00219923	0.104	0.07825	1	0	Congruent	UU
ENSMUSG00000030872	Gga2	0.0474264	0.00956373	0.0264922	0.00245521	0.117	0.097	1	0	0.0075134	0.00872906	0.0370197	0.00624591	0.13	0.10275	1	0	Congruent	UU
ENSMUSG00000030876	Mettl9	0.0348529	0.0246748	0.0235527	0.00535252	0.13	0.1055	1	0	0.496321	0.441674	0.0105439	0.0167318	0.118	0.1115	1	0	Congruent	UU
ENSMUSG00000030884	Uqcrc2	0.000116593	5.17132e-05	0.0648443	0.00193391	0.153	0.1095	1	0	0.045246	0.0427101	0.0364134	0.00816357	0.147	0.12625	1	0	Congruent	UU
ENSMUSG00000030967	Zranb1	0.123755	0.0194373	0.00312121	0.000401709	0.262	0.2345	1	0	0.325445	0.303831	0.00150194	0.0082685	0.289	0.27025	1	0	Congruent	UU
ENSMUSG00000030982	Vps35l	0.0660177	0.0183907	-0.0631004	0.00320008	0.124	0.142	1	0	0.651179	0.103612	-0.0251231	0.00746953	0.131	0.13425	1	0	Congruent	DD
ENSMUSG00000030986	Dhx32	0.0109682	0.00791468	0.0307991	0.00382792	0.156	0.1255	1	0	0.174161	0.156537	0.0210881	0.00776658	0.181	0.165	1	0	Congruent	UU
ENSMUSG00000030994	D7Ertd443e	5.47388e-12	7.43873e-12	-0.412012	0.0145538	0.169	0.248	1.35949e-07	1.84748e-07	2.40564e-14	2.75548e-14	-0.324309	0.013168	0.18	0.2695	6.89359e-10	7.89611e-10	Congruent	DD
ENSMUSG00000031007	Atp6ap2	0.00186554	0.00212195	0.0499881	0.00859356	0.193	0.1515	1	0	0.000813971	0.00154893	0.0687578	0.0225416	0.214	0.16425	0.511974	0.56382	Congruent	UU
ENSMUSG00000031010	Usp9x	0.590879	0.126973	0.0199906	0.00705308	0.685	0.7275	1	0	0.584942	0.258007	0.00400224	0.0221133	0.733	0.74825	1	0	Congruent	UU
ENSMUSG00000031012	Cask	0.284774	0.125505	-0.0571372	0.013606	0.46	0.4785	1	0	0.00121498	0.00185576	-0.112557	0.0168542	0.59	0.64375	0.942067	0.115867	Congruent	DD
ENSMUSG00000031028	Tub	0.302474	0.0410051	0.0138673	0.000480631	0.129	0.118	1	0	0.00235005	0.00295808	0.0563201	0.0082451	0.159	0.1265	1	0	Congruent	UU
ENSMUSG00000031066	Usp11	1.22611e-06	8.96783e-07	0.0916979	0.00485089	0.166	0.111	0.0304516	0.0222725	2.29361e-07	4.2055e-07	0.0961679	0.00784583	0.179	0.121	0.00657257	0.0120513	Congruent	UU
ENSMUSG00000031099	Smarca1	1.59123e-06	1.86719e-06	0.102707	0.00923209	0.326	0.2525	0.0395199	0.0463734	5.18871e-06	9.54653e-06	0.110034	0.00912332	0.361	0.295	0.148688	0.273565	Congruent	UU
ENSMUSG00000031105	Slc25a14	2.13828e-05	7.33095e-06	0.0785225	0.00144462	0.169	0.1205	0.531064	0.182072	0.0150134	0.0191939	0.0360299	0.00525995	0.187	0.1575	1	0	Congruent	UU
ENSMUSG00000031109	Enox2	0.867	0.0354967	-0.0296557	0.00176648	0.149	0.1445	1	0	0.210483	0.177977	-0.053032	0.0120566	0.149	0.16125	1	0	Congruent	DD
ENSMUSG00000031112	Stk26	4.45996e-07	1.23333e-07	0.101027	0.00186157	0.203	0.1415	0.0110768	0.0030631	1.70057e-09	1.96068e-09	0.113809	0.00316554	0.218	0.15025	4.87317e-05	5.61852e-05	Congruent	UU
ENSMUSG00000031129	Slc9a9	3.84316e-12	5.24558e-12	-0.256596	0.000383439	0.116	0.197	9.54487e-08	1.30279e-07	0.000730159	0.000521292	-0.13801	0.0143445	0.159	0.19425	0.910472	0.179057	Congruent	DD
ENSMUSG00000031134	Rbmx	0.305663	0.0293222	0.0110156	0.000919873	0.168	0.1545	1	0	0.0418317	0.0320002	0.0265155	0.0129027	0.199	0.17425	1	0	Congruent	UU
ENSMUSG00000031137	Fgf13	0.0205198	0.0119372	-0.131619	0.0177042	0.249	0.209	1	0	0.336512	0.217495	-0.0568802	0.0259667	0.295	0.2765	1	0	Congruent	DD
ENSMUSG00000031144	Syp	0.0419435	0.0338992	0.0428382	0.00567534	0.154	0.131	1	0	2.01844e-06	2.63547e-06	0.0851729	0.00221378	0.162	0.11425	0.0578405	0.0755219	Congruent	UU
ENSMUSG00000031153	Gripap1	1.62903e-09	2.05705e-09	0.168398	0.0104116	0.37	0.277	4.04585e-05	5.10888e-05	2.40184e-11	4.7843e-11	0.158154	0.0119433	0.374	0.27525	6.88272e-07	1.37099e-06	Congruent	UU
ENSMUSG00000031166	Wdr13	1.63305e-07	9.82794e-08	0.0925925	0.00244111	0.164	0.1055	0.00405583	0.00244087	1.10904e-07	1.38994e-07	0.0875836	0.00634752	0.156	0.10325	0.00317806	0.00398303	Congruent	UU
ENSMUSG00000031169	Porcn	0.0931612	0.0658557	0.0104706	0.0100507	0.135	0.1145	1	0	0.00644357	0.00757869	0.0442733	0.00981522	0.132	0.10425	1	0	Congruent	UU
ENSMUSG00000031174	Rpgr	2.37847e-06	1.98468e-06	0.108889	0.00546156	0.344	0.271	0.0590716	0.0492914	0.00333252	0.00297182	0.0670592	0.0157563	0.364	0.3215	1	0	Congruent	UU
ENSMUSG00000031189	Aff2	0.00370952	0.00167996	-0.108779	0.00159335	0.132	0.164	1	0	0.213151	0.232377	-0.0622207	0.0163816	0.155	0.169	1	0	Congruent	DD
ENSMUSG00000031201	Brcc3	0.277771	0.122402	0.00571441	0.00523516	0.135	0.121	1	0	0.507553	0.0710808	0.0105298	0.00538558	0.137	0.13	1	0	Congruent	UU
ENSMUSG00000031229	Atrx	0.00447585	0.00384232	-0.0738638	0.00971213	0.63	0.7	1	0	0.500678	0.387972	-0.0167977	0.0213626	0.721	0.755	1	0	Congruent	DD
ENSMUSG00000031231	Cox7b	0.000319556	0.000192695	0.0824309	0.00441047	0.226	0.1775	1	0	0.264416	0.189048	0.0114143	0.00927896	0.216	0.19975	1	0	Congruent	UU
ENSMUSG00000031256	Cstf2	0.00297149	0.0016108	0.0484277	0.00357161	0.223	0.1815	1	0	2.99407e-06	5.92703e-06	0.0940005	0.00901438	0.257	0.19325	0.0857979	0.169845	Congruent	UU
ENSMUSG00000031278	Acsl4	0.104886	0.0442911	0.0167769	0.00421063	0.147	0.1275	1	0	0.559666	0.305617	0.00349715	0.0144931	0.134	0.12975	1	0	Congruent	UU
ENSMUSG00000031290	Lrch2	0.0471532	0.00389367	0.0378498	0.00172175	0.227	0.2015	1	0	0.283272	0.0861541	0.0115463	0.00381391	0.241	0.2265	1	0	Congruent	UU
ENSMUSG00000031292	Cdkl5	0.00500161	0.00340246	0.0774117	0.00919369	0.697	0.703	1	0	0.656838	0.310834	0.00365375	0.0128667	0.751	0.771	1	0	Congruent	UU
ENSMUSG00000031309	Rps6ka3	0.00235554	0.00124779	0.125065	0.00523597	0.67	0.675	1	0	0.0372996	0.027794	0.0473949	0.0112925	0.738	0.73625	1	0	Congruent	UU
ENSMUSG00000031310	Zmym3	7.1491e-08	4.81269e-08	0.110851	0.00137702	0.227	0.158	0.00177555	0.00119528	1.78301e-16	3.55491e-16	0.152298	0.0125764	0.247	0.14525	5.1094e-12	1.01869e-11	Congruent	UU
ENSMUSG00000031314	Taf1	0.485796	0.0965542	0.00864381	0.00262697	0.195	0.184	1	0	0.0854374	0.0584681	0.0298112	0.0127732	0.223	0.20025	1	0	Congruent	UU
ENSMUSG00000031328	Flna	0.00258622	0.000406598	0.0638984	0	0.17	0.1355	1	0	0.000331681	0.000546197	0.064296	0.00364589	0.176	0.1365	1	0	Congruent	UU
ENSMUSG00000031333	Abcb7	0.560815	0.0902846	-0.0158714	0	0.17	0.1605	1	0	0.89678	0.0830678	-0.0188227	0.0044508	0.187	0.1865	1	0	Congruent	DD
ENSMUSG00000031337	Mtm1	0.32422	0.0628455	-0.0253944	0.00712225	0.111	0.1205	1	0	0.25381	0.0560705	-0.0403475	0.00112787	0.114	0.1235	1	0	Congruent	DD
ENSMUSG00000031342	Gpm6b	0.000304928	0.000169158	-0.16994	0.00795801	0.788	0.831	1	0	1.19978e-05	1.45009e-05	-0.141876	0.011674	0.796	0.83925	0.34381	0.415538	Congruent	DD
ENSMUSG00000031353	Rbbp7	0.000200244	0.000208802	0.0650529	0.00672094	0.16	0.1165	1	0	1.44025e-05	2.86812e-05	0.0834546	0.010143	0.171	0.11775	0.251331	0.499119	Congruent	UU
ENSMUSG00000031355	Arhgap6	0.000205132	0.000248317	0.114819	0.0211129	0.223	0.172	0.866897	0.188236	1.01413e-05	1.34088e-05	0.144457	0.0160398	0.284	0.22525	0.290609	0.384242	Congruent	UU
ENSMUSG00000031367	Ap1s2	0.0312179	0.0280066	0.033449	0.00882439	0.16	0.1325	1	0	0.0205252	0.0154732	0.0303075	0.0054391	0.166	0.14025	1	0	Congruent	UU
ENSMUSG00000031376	Atp2b3	0.32635	0.104843	0.0166154	0.00434	0.132	0.1215	1	0	0.0040979	0.00755037	0.0574766	0.00959709	0.156	0.1235	1	0	Congruent	UU
ENSMUSG00000031391	L1cam	9.43723e-11	1.2618e-10	0.129796	0.00579078	0.198	0.119	2.34383e-06	3.13381e-06	5.83443e-10	8.45997e-10	0.12087	0.0143048	0.187	0.118	1.67191e-05	2.42429e-05	Congruent	UU
ENSMUSG00000031392	Irak1	0.000199239	0.000166723	0.0728859	0.0018548	0.187	0.1405	1	0	4.92827e-07	4.53162e-07	0.101854	0.00614232	0.174	0.12075	0.0141225	0.0129858	Congruent	UU
ENSMUSG00000031422	Morf4l2	2.78512e-06	2.25572e-06	0.0712225	0.00242371	0.154	0.1015	0.0691713	0.056023	0.122827	0.140885	0.0266529	0.00964652	0.145	0.12825	1	0	Congruent	UU
ENSMUSG00000031425	Plp1	1.95404e-39	2.7555e-39	-1.06151	0.0182736	0.211	0.404	4.85305e-35	6.84355e-35	4.06393e-30	8.12318e-30	-0.533241	0.0371365	0.239	0.41	1.16456e-25	2.32778e-25	Congruent	DD
ENSMUSG00000031428	Zcchc18	8.94488e-18	1.17706e-17	0.252251	0.00594835	0.399	0.2745	2.22155e-13	2.92334e-13	1.93842e-19	3.46999e-19	0.227926	0.0088371	0.408	0.288	5.55473e-15	9.94361e-15	Congruent	UU
ENSMUSG00000031442	Mcf2l	3.22477e-14	2.62463e-14	0.207813	0.00209345	0.343	0.234	8.00904e-10	6.51854e-10	1.84953e-20	2.5556e-20	0.225677	0.00540486	0.424	0.29925	5.30001e-16	7.32333e-16	Congruent	UU
ENSMUSG00000031446	Cul4a	0.109543	0.0691737	0.0075872	0.00327343	0.151	0.1305	1	0	0.0994672	0.0580061	0.0218908	0.00972932	0.146	0.1285	1	0	Congruent	UU
ENSMUSG00000031447	Lamp1	0.00023284	0.000230049	-0.188134	0.00921209	0.178	0.2195	1	0	0.199213	0.144048	-0.0364208	0.0103632	0.164	0.1765	1	0	Congruent	DD
ENSMUSG00000031467	Agpat5	0.492779	0.0567475	0.012211	0.000468706	0.141	0.132	1	0	0.00773988	0.00704825	0.0300364	0.00467298	0.157	0.128	1	0	Congruent	UU
ENSMUSG00000031485	Plpbp	0.042822	0.00653158	0.0321553	0.000484052	0.131	0.1095	1	0	0.0911815	0.0449407	0.0196094	0.00231369	0.152	0.1335	1	0	Congruent	UU
ENSMUSG00000031503	Col4a2	0.0443808	0.0121522	0.0562256	0.00426738	0.152	0.13	1	0	2.40209e-06	2.54386e-06	0.0767842	0.00491358	0.15	0.10375	0.0688343	0.0728969	Congruent	UU
ENSMUSG00000031517	Gpm6a	1.20712e-17	1.70573e-17	0.236146	0.0134517	0.867	0.8795	2.99801e-13	4.23634e-13	2.19606e-05	2.71896e-05	0.103089	0.0214102	0.909	0.907	0.458741	0.494488	Congruent	UU
ENSMUSG00000031523	Dlc1	0.0674579	0.0100635	-0.108028	0.00827033	0.142	0.1585	1	0	0.496428	0.259835	-0.0547225	0.0150302	0.169	0.17525	1	0	Congruent	DD
ENSMUSG00000031532	Saraf	9.24036e-08	5.11422e-08	0.0940354	0.00273008	0.214	0.1445	0.00229494	0.00127017	0.000630626	0.00064709	0.066385	0.00774939	0.179	0.14125	1	0	Congruent	UU
ENSMUSG00000031537	Ikbkb	0.291021	0.0631743	0.00599382	0.0018874	0.131	0.1175	1	0	0.0014869	0.00183143	0.0505239	0.00493948	0.145	0.1125	1	0	Congruent	UU
ENSMUSG00000031540	Kat6a	0.102339	0.0365895	-0.0605579	0.00688875	0.213	0.2315	1	0	0.404669	0.197729	-0.0571634	0.0118825	0.245	0.24875	1	0	Congruent	DD
ENSMUSG00000031561	Tenm3	8.9624e-05	0.000107248	0.150862	0.0408531	0.687	0.713	0.671223	0.464961	0.00700479	0.0121511	0.102436	0.0263973	0.742	0.74975	1	0	Congruent	UU
ENSMUSG00000031563	Wwc2	0.919319	0.103744	-0.0144816	0.00485319	0.101	0.099	1	0	0.683827	0.288635	-0.00408557	0.00956037	0.112	0.1085	1	0	Congruent	DD
ENSMUSG00000031575	Ash2l	0.568152	0.0594266	0.00553885	0.00196181	0.103	0.097	1	0	0.0804486	0.0664567	0.0142585	0.00562865	0.126	0.10675	1	0	Congruent	UU
ENSMUSG00000031583	Wrn	0.11107	0.018685	-0.0836848	0.00172905	0.155	0.17	1	0	0.301383	0.144672	-0.0532809	0.00412759	0.154	0.16175	1	0	Congruent	DD
ENSMUSG00000031590	Frg1	0.0202749	0.00263039	0.0348663	0.00247067	0.113	0.0895	1	0	0.0523428	0.0427231	0.0183332	0.0103705	0.13	0.1095	1	0	Congruent	UU
ENSMUSG00000031600	Vps37a	0.00611902	0.00664652	0.0393724	0.00677236	0.202	0.1635	1	0	0.0520049	0.0572911	0.0310612	0.00734302	0.219	0.1925	1	0	Congruent	UU
ENSMUSG00000031601	Cnot7	1.51817e-05	4.10005e-06	0.0853741	0.00130927	0.251	0.191	0.377053	0.101829	0.00609596	0.00243394	0.0451407	0.00294502	0.272	0.236	1	0	Congruent	UU
ENSMUSG00000031605	Klhl2	4.59997e-08	1.73412e-09	-0.244848	0.0049763	0.529	0.5885	0.00114245	4.30687e-05	2.33274e-07	4.58531e-07	-0.222841	0.0143367	0.549	0.60175	0.00668471	0.0131397	Congruent	DD
ENSMUSG00000031608	Galnt7	0.0545697	0.0456017	-0.0949223	0.00465528	0.155	0.175	1	0	0.0823817	0.0623633	-0.0981843	0.00986461	0.192	0.2075	1	0	Congruent	DD
ENSMUSG00000031618	Nr3c2	0.00415562	0.00222699	-0.0619026	0.00429746	0.581	0.6595	1	0	0.0820314	0.107675	-0.0674117	0.0101226	0.553	0.57925	1	0	Congruent	DD
ENSMUSG00000031626	Sorbs2	2.3323e-10	9.96123e-11	0.135561	0.0107393	0.887	0.912	5.7925e-06	2.47397e-06	5.55855e-05	7.02556e-05	0.0901451	0.0315313	0.935	0.93625	0.508192	0.568048	Congruent	UU
ENSMUSG00000031627	Irf2	0.853564	0.122418	-0.0528454	0.00341327	0.172	0.1695	1	0	0.2372	0.196474	-0.0039286	0.0117327	0.2	0.18175	1	0	Congruent	DD
ENSMUSG00000031633	Slc25a4	8.62263e-07	8.12255e-07	0.0927991	0.00535039	0.23	0.1635	0.0214152	0.0201732	0.000226029	0.000310034	0.0671059	0.00313143	0.23	0.183	0.867115	0.26577	Congruent	UU
ENSMUSG00000031634	Ufsp2	0.0125461	0.00468152	0.0276302	0.000487056	0.13	0.102	1	0	0.0595039	0.105569	0.0351027	0.0101794	0.129	0.10675	1	0	Congruent	UU
ENSMUSG00000031644	Nek1	0.401109	0.0256375	-0.0623143	0.00223063	0.277	0.2815	1	0	0.537052	0.269639	-0.0218522	0.0155043	0.319	0.305	1	0	Congruent	DD
ENSMUSG00000031672	Got2	4.355e-05	3.33156e-05	0.0670213	0.00344725	0.144	0.1	0.748264	0.356008	1.11402e-05	8.83318e-06	0.0643097	0.00802656	0.151	0.1065	0.319232	0.253124	Congruent	UU
ENSMUSG00000031701	Dnaja2	0.000934347	0.000389885	0.0621074	0.00552922	0.26	0.211	1	0	0.0674054	0.07205	0.0471695	0.0169866	0.253	0.22425	1	0	Congruent	UU
ENSMUSG00000031703	Itfg1	0.000206644	0.000250058	0.052138	0.0127431	0.381	0.309	0.87039	0.183296	0.158813	0.260763	0.0153796	0.0252158	0.397	0.36325	1	0	Congruent	UU
ENSMUSG00000031706	Rfx1	0.00118484	1.80608e-05	0.0473173	0.000503897	0.111	0.08	1	0	0.000211595	0.000411403	0.0496198	0.0107828	0.118	0.0805	0.377127	0.448569	Congruent	UU
ENSMUSG00000031708	Tecr	2.39349e-06	2.0342e-07	0.0657369	0.00267929	0.401	0.314	0.0594446	0.00505214	1.74092e-09	3.36745e-09	0.150366	0.00655325	0.393	0.30225	4.98877e-05	9.64977e-05	Congruent	UU
ENSMUSG00000031714	Gab1	1.10801e-23	8.42614e-24	-0.403247	0.00648794	0.088	0.2	2.75186e-19	2.09272e-19	6.66348e-23	1.01827e-22	-0.339071	0.0166605	0.092	0.1915	1.90949e-18	2.91796e-18	Congruent	DD
ENSMUSG00000031729	Ist1	7.43203e-05	0.00010342	0.0643165	0.015802	0.183	0.1295	0.514793	0.686187	9.75551e-07	1.13346e-06	0.0894751	0.00381433	0.191	0.138	0.0279554	0.0324804	Congruent	UU
ENSMUSG00000031732	Phlpp2	0.472628	0.120561	0.00538133	0.00571242	0.129	0.121	1	0	0.0997791	0.167027	0.017405	0.0152108	0.159	0.136	1	0	Congruent	UU
ENSMUSG00000031748	Gnao1	0.00760272	0.00297412	-0.0734596	0.00383032	0.697	0.7675	1	0	3.62605e-08	6.9723e-08	-0.154508	0.0174965	0.7	0.7715	0.00103908	0.00199798	Congruent	DD
ENSMUSG00000031750	Il34	9.72829e-06	9.41808e-06	0.068681	0.00304519	0.121	0.0775	0.241612	0.233907	8.61639e-07	1.28484e-06	0.0702944	0.00638248	0.121	0.07675	0.0246911	0.0368183	Congruent	UU
ENSMUSG00000031751	Amfr	0.339532	0.0644869	0.0118045	0.00186242	0.155	0.143	1	0	0.00239515	0.00245928	0.0448048	0.00895139	0.176	0.141	1	0	Congruent	UU
ENSMUSG00000031753	Cog4	0.509046	0.0633085	0.0108374	0.000961489	0.122	0.1145	1	0	0.618092	0.256571	0.0041647	0.00888631	0.135	0.12975	1	0	Congruent	UU
ENSMUSG00000031755	Bbs2	0.064595	0.0499408	0.0269568	0.00394639	0.116	0.096	1	0	0.00932775	0.00654293	0.0317351	0.00330704	0.122	0.09775	1	0	Congruent	UU
ENSMUSG00000031758	Cdyl2	0.000500854	0.000193646	0.0788509	0.00363849	0.192	0.1495	1	0	0.0298391	0.0305579	0.0177935	0.00979045	0.175	0.14775	1	0	Congruent	UU
ENSMUSG00000031760	Mt3	2.14488e-07	1.72634e-07	0.0901787	0.00288175	0.158	0.1	0.00532702	0.00428754	1.85993e-11	2.8852e-11	0.120238	0.00409345	0.131	0.0715	5.32981e-07	8.26782e-07	Congruent	UU
ENSMUSG00000031765	Mt1	0.000883147	0.000692374	0.0713793	0.00457873	0.16	0.12	1	0	5.64986e-09	8.15011e-09	0.119638	0.00755042	0.156	0.0995	0.000161902	0.00023355	Congruent	UU
ENSMUSG00000031778	Cx3cl1	4.37443e-27	3.25841e-27	0.256427	0.00088785	0.337	0.186	1.08643e-22	8.09259e-23	1.11522e-06	2.22284e-06	0.10939	0.0114999	0.284	0.214	0.0319578	0.0636978	Congruent	UU
ENSMUSG00000031791	Tmem38a	1.67208e-08	1.48569e-08	0.10612	0.00295693	0.165	0.102	0.000415277	0.000368987	0.00815069	0.0154766	0.0426472	0.0134725	0.157	0.1235	1	0	Congruent	UU
ENSMUSG00000031796	Cfap20	6.72741e-07	5.64692e-07	0.0880905	0.00468815	0.196	0.1345	0.0167082	0.0140247	5.83297e-06	6.24777e-06	0.0741575	0.0034854	0.189	0.139	0.16715	0.179036	Congruent	UU
ENSMUSG00000031808	Slc27a1	0.463308	0.0508507	0.0165966	0.00754963	0.114	0.1065	1	0	0.000217105	0.000326969	0.0815245	0.00553371	0.113	0.0795	0.666106	0.40705	Congruent	UU
ENSMUSG00000031818	Cox4i1	1.36163e-16	8.15664e-17	0.219278	0.00464564	0.305	0.1865	3.38175e-12	2.02578e-12	5.43846e-09	8.17143e-09	0.148884	0.00929784	0.272	0.19975	0.000155845	0.00023416	Congruent	UU
ENSMUSG00000031822	Gse1	0.224912	0.0410717	-0.0123973	0.00238072	0.245	0.225	1	0	0.5093	0.345349	-0.017124	0.0179114	0.223	0.215	1	0	Congruent	DD
ENSMUSG00000031826	Usp10	0.000538469	0.000400432	0.0471178	0.00243645	0.137	0.0995	1	0	0.0570969	0.0360574	0.0295984	0.00372585	0.126	0.1075	1	0	Congruent	UU
ENSMUSG00000031835	Mbtps1	0.000667857	0.000635686	0.0637562	0.00822174	0.248	0.1995	1	0	0.00068004	0.000677035	0.0609704	0.00530524	0.24	0.197	1	0	Congruent	UU
ENSMUSG00000031837	Necab2	8.44305e-09	5.035e-09	0.122993	0.00280773	0.215	0.1435	0.000209692	0.000125049	2.74267e-09	5.437e-09	0.113993	0.00958021	0.209	0.1365	7.85939e-05	0.000155803	Congruent	UU
ENSMUSG00000031840	Rab3a	1.21903e-08	1.63462e-08	0.10068	0.00542497	0.157	0.0935	0.000302758	0.000405974	9.51006e-08	9.52778e-08	0.0902171	0.00520296	0.152	0.10025	0.0027252	0.00273028	Congruent	UU
ENSMUSG00000031841	Cdh13	0.0194727	0.000159285	-0.0892145	0.00654583	0.481	0.53	1	0	0.0040471	0.00358326	-0.0818022	0.0265502	0.548	0.60425	0.927722	0.144556	Congruent	DD
ENSMUSG00000031858	Mau2	0.083723	0.0158557	0.0106845	0.00089212	0.185	0.16	1	0	0.0121554	0.00380935	0.0339503	0.00337997	0.181	0.15375	1	0	Congruent	UU
ENSMUSG00000031864	Ints10	0.0315971	0.020293	0.0312382	0.00279108	0.168	0.1405	1	0	0.137474	0.0727764	0.0170068	0.00404464	0.19	0.17225	1	0	Congruent	UU
ENSMUSG00000031865	Dctn1	1.64441e-05	9.07093e-06	0.0901062	0.00365249	0.37	0.299	0.408405	0.225286	8.77917e-20	1.62355e-19	0.20948	0.0117023	0.373	0.24825	2.51576e-15	4.65245e-15	Congruent	UU
ENSMUSG00000031878	Nae1	0.00245911	0.00292031	0.062544	0.00829564	0.229	0.185	1	0	2.10792e-05	3.80724e-05	0.0821617	0.0173369	0.233	0.1755	0.295032	0.476871	Congruent	UU
ENSMUSG00000031902	Nfatc3	0.170638	0.0824371	-0.0481491	0.000917392	0.127	0.1395	1	0	0.398893	0.181321	-0.00211823	0.0110265	0.152	0.14075	1	0	Congruent	DD
ENSMUSG00000031904	Slc7a6	0.0174129	0.0109753	0.0452196	0.0036597	0.19	0.1595	1	0	0.0103463	0.0118454	0.0362278	0.00672493	0.195	0.1635	1	0	Congruent	UU
ENSMUSG00000031906	Smpd3	1.72352e-30	4.08352e-31	0.329507	0.00315996	0.496	0.318	4.28053e-26	1.01418e-26	4.07259e-10	4.4445e-10	0.175063	0.0081682	0.456	0.36725	1.16704e-05	1.27362e-05	Congruent	UU
ENSMUSG00000031918	Mtmr2	4.90994e-10	1.24217e-10	-0.186045	0	0.103	0.169	1.21943e-05	3.08505e-06	6.16879e-06	6.87402e-06	-0.13283	0.0149581	0.132	0.1785	0.176773	0.196982	Congruent	DD
ENSMUSG00000031924	Cyb5b	0.521149	0.0150388	-0.000684228	0.00193667	0.113	0.106	1	0	0.648718	0.197728	-0.00809722	0.0111186	0.122	0.119	1	0	Congruent	DD
ENSMUSG00000031932	Gpr83	0.00536692	0.000297273	0.0424193	0.00490925	0.121	0.0925	1	0	0.000401108	0.000442702	0.0514361	0.00426024	0.131	0.0975	1	0	Congruent	UU
ENSMUSG00000031967	Afg3l1	0.805766	0.236209	-0.00748863	0.00865753	0.117	0.114	1	0	0.446619	0.0953108	-0.00197342	0.00615639	0.119	0.111	1	0	Congruent	DD
ENSMUSG00000031971	Ccsap	0.319656	0.140413	0.0241574	0.00393687	0.117	0.107	1	0	0.0137633	0.0234194	0.0404079	0.00751929	0.149	0.1205	1	0	Congruent	UU
ENSMUSG00000031985	Gnpat	0.433976	0.041471	0.0135658	0.00096376	0.125	0.1165	1	0	1.19094e-07	1.65338e-07	0.0768762	0.00298831	0.143	0.09225	0.00341276	0.00473794	Congruent	UU
ENSMUSG00000031990	Jam3	0.000510703	0.000207901	-0.160246	0.000403936	0.128	0.164	1	0	0.00171268	0.000705882	-0.118655	0.010852	0.139	0.16875	1	0	Congruent	DD
ENSMUSG00000031996	Aplp2	7.80952e-09	3.74519e-09	0.100838	0.012193	0.435	0.329	0.000193957	9.30155e-05	6.82534e-06	4.57561e-06	0.10591	0.00565896	0.426	0.35925	0.195587	0.131119	Congruent	UU
ENSMUSG00000032002	Dcun1d5	0.012311	0.000871892	0.0325517	0.00130536	0.225	0.1895	1	0	0.0234807	0.0128917	0.0301522	0.00627891	0.24	0.2095	1	0	Congruent	UU
ENSMUSG00000032009	Sesn3	1.34952e-11	1.28034e-11	0.169707	0.0105793	0.399	0.2955	3.35168e-07	3.17984e-07	0.000672689	0.000905356	0.082687	0.0165711	0.421	0.36225	0.752226	0.495547	Congruent	UU
ENSMUSG00000032010	Usp2	0.00169007	0.00180181	0.0552747	0.00824175	0.185	0.145	1	0	9.5772e-07	1.16423e-06	0.107026	0.00497168	0.234	0.176	0.0274444	0.0333621	Congruent	UU
ENSMUSG00000032011	Thy1	5.38663e-15	7.60116e-15	0.16657	0.0120728	0.215	0.117	1.33782e-10	1.88782e-10	6.22942e-05	4.12719e-05	0.0651927	0.00477268	0.173	0.13125	0.904623	0.188231	Congruent	UU
ENSMUSG00000032017	Grik4	0.486867	0.0951789	-0.0677032	0.00213552	0.142	0.1465	1	0	0.649226	0.236789	-0.00843862	0.00818929	0.161	0.158	1	0	Congruent	DD
ENSMUSG00000032020	Ubash3b	1.93674e-14	2.58113e-14	-0.290733	0.00947668	0.156	0.251	4.81009e-10	6.41048e-10	5.2479e-10	8.38214e-10	-0.167883	0.00431506	0.174	0.2475	1.50384e-05	2.40199e-05	Congruent	DD
ENSMUSG00000032024	Clmp	5.30012e-06	6.23956e-06	0.0906684	0.00436268	0.163	0.111	0.131634	0.154966	0.0440351	0.0146818	0.0364261	0.00277068	0.158	0.1375	1	0	Congruent	UU
ENSMUSG00000032030	Cul5	0.0313892	0.00527611	0.0325867	0.00125969	0.256	0.224	1	0	0.000328656	0.000652356	0.0782412	0.0194541	0.307	0.2455	0.303339	0.474142	Congruent	UU
ENSMUSG00000032042	Srpr	2.07261e-05	1.19199e-06	0.0692326	0.00137393	0.2	0.145	0.514753	0.0296044	0.00381349	0.00609689	0.0470501	0.00662159	0.201	0.16325	1	0	Congruent	UU
ENSMUSG00000032046	Abhd12	0.732561	0.00764573	-0.0647531	0.00707069	0.233	0.225	1	0	0.354229	0.288083	-0.00179061	0.0160275	0.251	0.23425	1	0	Congruent	DD
ENSMUSG00000032047	Acat1	0.225625	0.0111645	0.0252306	0.00175583	0.201	0.185	1	0	0.0376467	0.0197174	0.0228044	0.00664445	0.239	0.211	1	0	Congruent	UU
ENSMUSG00000032050	Rdx	6.6235e-06	5.42162e-06	-0.127687	0.00171958	0.115	0.1635	0.164501	0.134651	0.168722	0.126804	-0.0356717	0.0257681	0.134	0.141	1	0	Congruent	DD
ENSMUSG00000032064	Dixdc1	0.455495	0.164253	-0.0884491	0.0096577	0.166	0.17	1	0	0.922826	0.0749278	-0.0263961	0.00929181	0.21	0.20525	1	0	Congruent	DD
ENSMUSG00000032076	Cadm1	0.00161267	0.000249553	0.135594	0.0127657	0.772	0.8045	1	0	1.20176e-05	1.36431e-05	0.179628	0.0223767	0.827	0.82125	0.344377	0.390957	Congruent	UU
ENSMUSG00000032087	Dscaml1	2.42404e-26	3.40053e-26	-0.412216	0.0127263	0.469	0.6235	6.02034e-22	8.44556e-22	1.90754e-08	3.13183e-08	-0.211819	0.0313737	0.587	0.66525	0.000546625	0.000897457	Congruent	DD
ENSMUSG00000032096	Arcn1	0.56773	0.119746	-0.0168871	0.00379941	0.116	0.122	1	0	0.784571	0.158792	-0.00595696	0.00833282	0.128	0.12625	1	0	Congruent	DD
ENSMUSG00000032097	Ddx6	0.00133408	0.000307616	0.0539961	0.000420589	0.261	0.2115	1	0	0.0073498	0.00656842	0.045639	0.0105197	0.279	0.2415	1	0	Congruent	UU
ENSMUSG00000032118	Fez1	0.119222	0.0192111	-0.0663304	0.00295754	0.172	0.189	1	0	0.45185	0.113764	-0.0301022	0.0134392	0.199	0.19975	1	0	Congruent	DD
ENSMUSG00000032120	C2cd2l	6.17766e-09	2.0702e-09	0.11072	0.00238629	0.195	0.1255	0.000153428	5.14156e-05	1.98732e-07	2.24659e-07	0.0808041	0.00722819	0.176	0.12	0.00569487	0.00643783	Congruent	UU
ENSMUSG00000032174	Icam5	2.12948e-23	2.37494e-23	0.238095	0.00545045	0.298	0.165	5.28878e-19	5.8984e-19	1.01333e-17	2.02199e-17	0.187471	0.0109843	0.286	0.176	2.9038e-13	5.79421e-13	Congruent	UU
ENSMUSG00000032177	Pde4a	5.59848e-05	4.54454e-05	0.0863363	0.00174756	0.242	0.1875	0.796169	0.28826	1.7589e-06	3.42873e-06	0.101248	0.0118898	0.287	0.22075	0.0504029	0.0982538	Congruent	UU
ENSMUSG00000032178	Ilf3	0.0177983	0.0072226	0.0381276	0.00447823	0.21	0.177	1	0	0.000743725	0.0011818	0.058061	0.0152103	0.229	0.181	0.547595	0.527127	Congruent	UU
ENSMUSG00000032186	Tmod2	0.0342858	0.019699	-0.162924	0.00487273	0.277	0.2925	1	0	0.0025862	0.00299741	-0.138719	0.0267851	0.336	0.36825	1	0	Congruent	DD
ENSMUSG00000032187	Smarca4	0.0127774	0.00530529	0.049232	0.00381678	0.253	0.2175	1	0	0.0275389	0.0401611	0.0460936	0.0146149	0.287	0.25375	1	0	Congruent	UU
ENSMUSG00000032192	Gnb5	1.25968e-18	1.30306e-18	0.229929	0.0041085	0.365	0.237	3.12854e-14	3.23628e-14	0.00128979	0.00233208	0.0779709	0.0194061	0.361	0.30375	0.750858	0.498283	Congruent	UU
ENSMUSG00000032212	Sltm	0.007197	0.00450316	-0.0649701	0.00595704	0.634	0.7005	1	0	0.789019	0.135318	-0.0156506	0.0103143	0.668	0.67675	1	0	Congruent	DD
ENSMUSG00000032228	Tcf12	1.08284e-19	1.49799e-19	-0.357704	0.00693032	0.666	0.776	2.68934e-15	3.72041e-15	7.59232e-08	1.51801e-07	-0.26194	0.0217426	0.732	0.7825	0.00217566	0.00435	Congruent	DD
ENSMUSG00000032238	Rora	1.81696e-14	1.90338e-14	0.16295	0.00539804	0.96	0.956	4.5126e-10	4.72723e-10	0.0229067	0.0316648	0.036747	0.0117938	0.972	0.9725	1	0	Congruent	UU
[truncated: 1,971 more rows]

## Sheet: incongruent
ensembl	gene	p_val.mean.KO-2	p_val.std.KO-2	avg_log2FC.mean.KO-2	avg_log2FC.std.KO-2	pct.1.mean.KO-2	pct.2.mean.KO-2	p_val_adj.mean.KO-2	p_val_adj.std.KO-2	p_val.mean.KO-1	p_val.std.KO-1	avg_log2FC.mean.KO-1	avg_log2FC.std.KO-1	pct.1.mean.KO-1	pct.2.mean.KO-1	p_val_adj.mean.KO-1	p_val_adj.std.KO-1	type	code
ENSMUSG00000000085	Scmh1	0.776113	0.069323	0.0140737	0.00563898	0.635	0.6665	1	0	0.902342	0.0490869	-0.00269571	0.00888494	0.688	0.6995	1	0	Incongruent	UD
ENSMUSG00000000131	Xpo6	0.304779	0.103161	0.0184756	0.00788433	0.2	0.1855	1	0	0.469781	0.218551	-0.0305353	0.00361181	0.204	0.21025	1	0	Incongruent	UD
ENSMUSG00000000197	Nalcn	0.0384929	0.00525988	0.0713412	0.00221102	0.717	0.7465	1	0	0.529093	0.285688	-0.0153271	0.0138349	0.773	0.80075	1	0	Incongruent	UD
ENSMUSG00000000420	Galnt1	0.596506	0.0571985	-0.00129724	0.00275341	0.154	0.146	1	0	0.115806	0.207772	0.028846	0.0182687	0.171	0.14725	1	0	Incongruent	DU
ENSMUSG00000000631	Myo18a	0.00238416	0.00218438	0.0480132	0.0110128	0.34	0.2845	1	0	0.0644969	0.0804543	-0.000164648	0.0115272	0.32	0.2835	1	0	Incongruent	UD
ENSMUSG00000000838	Fmr1	0.4922	0.276196	-0.0434663	0.00751569	0.161	0.167	1	0	0.0387217	0.0698534	0.0386471	0.0114259	0.209	0.17825	1	0	Incongruent	DU
ENSMUSG00000000861	Bcl11a	1.08516e-05	8.33199e-07	0.0952629	0.000369415	0.349	0.282	0.26951	0.0206933	0.52332	0.302494	-0.00361615	0.0139105	0.51	0.53125	1	0	Incongruent	UD
ENSMUSG00000000902	Smarcb1	0.533833	0.191733	0.00948654	0.00480519	0.121	0.114	1	0	0.748006	0.250557	-0.00728247	0.00220064	0.128	0.12325	1	0	Incongruent	UD
ENSMUSG00000001016	Ilf2	0.813978	0.256841	-0.0115604	0.00574998	0.117	0.114	1	0	0.0284312	0.0428304	0.0314867	0.00973966	0.133	0.10875	1	0	Incongruent	DU
ENSMUSG00000001017	Chtop	0.130984	0.0232398	-0.0366462	0	0.109	0.1235	1	0	0.159002	0.111092	0.0165699	0.00790739	0.131	0.11625	1	0	Incongruent	DU
ENSMUSG00000001052	Sec24b	0.0301878	0.0243807	0.0142424	0.00832772	0.286	0.2475	1	0	0.162472	0.0513457	-0.00280685	0.00708517	0.317	0.28975	1	0	Incongruent	UD
ENSMUSG00000001376	Vps50	0.172242	0.0844234	-0.00542028	0	0.227	0.204	1	0	0.0758575	0.0661147	0.0215062	0.00873688	0.26	0.233	1	0	Incongruent	DU
ENSMUSG00000001424	Snd1	0.0075036	0.000798256	0.0219854	0.0068748	0.327	0.279	1	0	0.553515	0.289356	-0.0306404	0.0201322	0.364	0.35525	1	0	Incongruent	UD
ENSMUSG00000001847	Rac1	0.15564	0.056621	0.0137321	0.000475922	0.133	0.1155	1	0	0.323069	0.239109	-0.00851433	0.0242378	0.122	0.125	1	0	Incongruent	UD
ENSMUSG00000001855	Nup214	0.161959	0.0902098	-0.0291636	0.00742598	0.126	0.1405	1	0	0.0291488	0.0264879	0.0277538	0.0126265	0.167	0.13975	1	0	Incongruent	DU
ENSMUSG00000001891	Ugp2	0.539271	0.290872	0.000358962	0.0126494	0.127	0.1185	1	0	0.789419	0.305086	-0.0109203	0.0106469	0.128	0.1295	1	0	Incongruent	UD
ENSMUSG00000002015	Bcap31	0.862683	0.0305394	-0.0370465	0.0105335	0.128	0.1245	1	0	0.324461	0.212482	0.00592225	0.0098847	0.112	0.102	1	0	Incongruent	DU
ENSMUSG00000002109	Ddb2	0.427407	0.026093	-0.00424937	0.00786684	0.141	0.1305	1	0	0.0464473	0.0348589	0.0313927	0.0114626	0.137	0.11575	1	0	Incongruent	DU
ENSMUSG00000002413	Braf	0.489594	0.227437	0.0185508	0.00710548	0.666	0.721	1	0	0.459308	0.218143	-0.00823536	0.01819	0.733	0.765	1	0	Incongruent	UD
ENSMUSG00000002428	Hltf	0.765004	0.125914	-0.0396357	0.00877922	0.165	0.1625	1	0	0.246887	0.0905476	0.00049788	0.00817428	0.181	0.16525	1	0	Incongruent	DU
ENSMUSG00000002459	Rgs20	4.81147e-08	1.34963e-08	0.0764357	0.00141235	0.483	0.37	0.00119498	0.000335193	0.609287	0.259135	-0.0406154	0.00783182	0.592	0.59	1	0	Incongruent	UD
ENSMUSG00000002718	Cse1l	0.703835	0.0832017	-0.0142807	0.000956979	0.115	0.1095	1	0	0.0517045	0.0342127	0.0229885	0.00377642	0.127	0.108	1	0	Incongruent	DU
ENSMUSG00000002728	Naa20	0.768413	0.246634	-0.00267166	0.0037783	0.135	0.131	1	0	0.0550714	0.0516236	0.0203128	0.0138544	0.159	0.13725	1	0	Incongruent	DU
ENSMUSG00000002748	Baz1b	0.0631008	0.038239	0.00852773	0.00403058	0.269	0.235	1	0	0.458382	0.24228	-0.0363189	0.0207329	0.291	0.286	1	0	Incongruent	UD
ENSMUSG00000002846	Timmdc1	0.913769	0.0916556	-0.0153742	0.00240316	0.114	0.114	1	0	0.394605	0.173443	0.0107906	0.0045186	0.129	0.1205	1	0	Incongruent	DU
ENSMUSG00000003119	Cdk12	0.366515	0.187008	-0.0631857	0.0107015	0.287	0.2935	1	0	0.014243	0.0120748	0.0327656	0.0107648	0.348	0.306	1	0	Incongruent	DU
ENSMUSG00000003410	Elavl3	0.440513	0.0582719	-0.0712507	0.00235961	0.236	0.2395	1	0	0.0114002	0.0178897	0.0355778	0.0213237	0.261	0.22025	0.969646	0.0607089	Incongruent	DU
ENSMUSG00000003746	Man1a	9.3566e-11	5.83379e-11	0.138386	0.0035029	0.416	0.3005	2.32381e-06	1.44888e-06	0.316595	0.238092	-0.0923036	0.024846	0.424	0.384	1	0	Incongruent	UD
ENSMUSG00000003778	Brd8	0.154223	0.0322158	-0.000308311	0.0039583	0.193	0.1725	1	0	0.000395538	0.000681836	0.0716783	0.0262404	0.23	0.178	0.521692	0.553418	Incongruent	DU
ENSMUSG00000004040	Stat3	0.0540302	0.0326773	-0.0655443	0.00598054	0.108	0.127	1	0	0.00330434	0.00574794	0.048431	0.00838147	0.127	0.0965	1	0	Incongruent	DU
ENSMUSG00000004070	Hmox2	0.00918224	0.0098114	-0.0977618	0.0119939	0.128	0.155	1	0	0.360508	0.0368552	0.00440946	0.00215577	0.146	0.13475	1	0	Incongruent	DU
ENSMUSG00000004071	Cdip1	0.917055	0.0289955	-0.0297959	0.00885068	0.201	0.1975	1	0	0.142137	0.168506	0.0201205	0.0130313	0.237	0.2125	1	0	Incongruent	DU
ENSMUSG00000004319	Clcn3	0.0428268	0.0288668	0.0125965	0.00839025	0.338	0.297	1	0	0.660776	0.130495	-0.0344056	0.00472361	0.344	0.34025	1	0	Incongruent	UD
ENSMUSG00000004360	9330159F19Rik	0.467442	0.136911	-0.0500926	0.0039413	0.165	0.17	1	0	0.00186851	0.00246621	0.0539912	0.0215596	0.213	0.17025	0.76401	0.471979	Incongruent	DU
ENSMUSG00000004455	Ppp1cc	0.78578	0.231262	-0.0441761	0.00769275	0.193	0.1845	1	0	0.0486595	0.0370421	0.0302242	0.00414253	0.183	0.15975	1	0	Incongruent	DU
ENSMUSG00000004535	Tax1bp1	0.000937507	0.00088996	0.0565068	0.00991481	0.249	0.2	1	0	0.559818	0.34413	-0.00781315	0.0134693	0.258	0.2485	1	0	Incongruent	UD
ENSMUSG00000004568	Arhgef18	0.672184	0.0836662	-0.00377792	0.00242602	0.113	0.108	1	0	0.0522802	0.0500959	0.0376457	0.00555162	0.135	0.11575	1	0	Incongruent	DU
ENSMUSG00000004631	Sgce	0.740575	0.236898	-0.00483088	0.0100666	0.247	0.2395	1	0	0.227288	0.111728	0.00825408	0.00728896	0.263	0.24425	1	0	Incongruent	DU
ENSMUSG00000004677	Myo9b	0.786195	0.222783	-0.0231145	0.00137023	0.152	0.1465	1	0	0.223944	0.0747567	0.0132127	0.00458079	0.167	0.15375	1	0	Incongruent	DU
ENSMUSG00000004789	Dlst	0.172383	0.0346752	-0.0377331	0.00326296	0.128	0.142	1	0	0.127525	0.0627375	0.0131728	0.00505915	0.158	0.14025	1	0	Incongruent	DU
ENSMUSG00000004980	Hnrnpa2b1	0.0207372	0.00971374	-0.090692	0.0070613	0.694	0.753	1	0	0.137652	0.157233	0.0470542	0.0151633	0.748	0.7405	1	0	Incongruent	DU
ENSMUSG00000005034	Prkacb	0.0111735	0.00124784	0.054092	0.000715135	0.357	0.313	1	0	0.612999	0.227876	-0.0146538	0.0123596	0.385	0.387	1	0	Incongruent	UD
ENSMUSG00000005312	Ubqln1	0.0120751	0.00625846	0.0338134	0.000479051	0.143	0.1145	1	0	0.603043	0.167469	-0.0201091	0.00767157	0.142	0.147	1	0	Incongruent	UD
ENSMUSG00000005362	Crbn	0.57366	0.105261	-0.0138507	0.00292443	0.102	0.108	1	0	0.113157	0.0703842	0.0158141	0.00678795	0.12	0.104	1	0	Incongruent	DU
ENSMUSG00000005501	Usp40	0.36336	0.0995464	-0.0105489	0.00349812	0.193	0.1785	1	0	0.0888571	0.100797	0.014201	0.0137628	0.227	0.202	1	0	Incongruent	DU
ENSMUSG00000005534	Insr	0.159913	0.053535	0.00413055	0.00500888	0.24	0.216	1	0	0.409763	0.209609	-0.0587384	0.0179404	0.251	0.25275	1	0	Incongruent	UD
ENSMUSG00000005580	Adcy9	0.00197087	0.000925856	-0.0501157	0.000273166	0.577	0.6555	1	0	0.00375363	0.00662384	0.0703754	0.0114315	0.717	0.70425	1	0	Incongruent	DU
ENSMUSG00000005609	Ctr9	0.456549	0.499976	0.0098646	0.0187099	0.119	0.109	1	0	0.648217	0.323445	-0.00268867	0.00755422	0.128	0.12225	1	0	Incongruent	UD
ENSMUSG00000005621	Zfp592	0.535755	0.148207	-0.00825826	0.00291191	0.108	0.1005	1	0	0.0183271	0.0111468	0.0220353	0.0043319	0.115	0.093	1	0	Incongruent	DU
ENSMUSG00000005656	Snx6	0.739526	0.273236	-0.0215901	0.00678738	0.153	0.146	1	0	0.0524028	0.0475012	0.0359128	0.00870957	0.177	0.15475	1	0	Incongruent	DU
ENSMUSG00000005687	Bcas2	0.471421	0.15119	-0.0187327	0.00470111	0.127	0.1345	1	0	0.00837817	0.0102171	0.0572374	0.0107855	0.139	0.1115	1	0	Incongruent	DU
ENSMUSG00000005882	Uqcc1	0.405203	0.0792979	-0.0326964	0.00190502	0.11	0.1175	1	0	0.159884	0.107789	0.0135463	0.00424548	0.134	0.119	1	0	Incongruent	DU
ENSMUSG00000005907	Pex1	0.731159	0.00313406	-0.0165537	0.000475036	0.121	0.124	1	0	0.018405	0.0215712	0.030415	0.010837	0.152	0.12375	1	0	Incongruent	DU
ENSMUSG00000006476	Nsmf	0.532725	0.0733958	-0.0225262	0.00270954	0.138	0.1285	1	0	0.0594941	0.0463411	0.0319562	0.0108504	0.129	0.10825	1	0	Incongruent	DU
ENSMUSG00000006526	Stimate	0.889122	0.0103446	-0.0170171	0	0.117	0.1155	1	0	0.0941272	0.0870674	0.0204981	0.0114294	0.126	0.10775	1	0	Incongruent	DU
ENSMUSG00000006675	P4htm	0.763741	0.0845813	-0.0131666	0.000452089	0.161	0.156	1	0	5.70005e-10	9.97621e-10	0.109523	0.00643573	0.208	0.1355	1.63341e-05	2.85878e-05	Incongruent	DU
ENSMUSG00000006678	Pola1	0.135822	0.0384294	0.000315426	0.0104803	0.219	0.1945	1	0	0.53346	0.247101	-0.0360772	0.0189436	0.254	0.2545	1	0	Incongruent	UD
ENSMUSG00000006711	D130043K22Rik	0.000319285	0.000261451	0.0561653	0.00289265	0.158	0.116	1	0	0.653433	0.235003	-0.00412558	0.0112521	0.156	0.152	1	0	Incongruent	UD
ENSMUSG00000006740	Kif5b	0.00402757	0.00270821	0.0395392	0.00436042	0.286	0.24	1	0	0.501586	0.43224	-0.0068079	0.0208939	0.298	0.2825	1	0	Incongruent	UD
ENSMUSG00000007653	Gabrb2	0.00248439	0.000231128	0.0979876	0.00703361	0.626	0.63	1	0	0.00318751	0.00392595	-0.0748116	0.0103194	0.686	0.738	1	0	Incongruent	UD
ENSMUSG00000007817	Zmiz1	0.530939	0.05436	-0.00163623	0.00417046	0.118	0.1235	1	0	0.0170705	0.0126045	0.0144508	0.00718231	0.124	0.1	1	0	Incongruent	DU
ENSMUSG00000007850	Hnrnph1	0.211916	0.142876	0.0228985	0.0135578	0.54	0.5195	1	0	0.0716117	0.0106522	-0.0322409	0.00666808	0.603	0.63675	1	0	Incongruent	UD
ENSMUSG00000008200	Fnbp4	0.889772	0.0733237	-0.0199159	0.000417491	0.227	0.222	1	0	0.323098	0.212984	0.00669717	0.00802814	0.266	0.249	1	0	Incongruent	DU
ENSMUSG00000008730	Hipk1	0.00404342	0.00227113	0.0388686	0.00138137	0.179	0.1435	1	0	0.469237	0.239761	-0.00392519	0.0139394	0.165	0.1585	1	0	Incongruent	UD
ENSMUSG00000008763	Man1a2	0.00181095	0.000734319	0.0524163	0.00101557	0.409	0.3515	1	0	0.749068	0.223976	-0.0167224	0.0134217	0.538	0.539	1	0	Incongruent	UD
ENSMUSG00000008859	Rala	0.426003	0.0156952	-0.00743117	0.00410336	0.159	0.148	1	0	0.422906	0.28095	0.00603965	0.0136761	0.18	0.168	1	0	Incongruent	DU
ENSMUSG00000009079	Ewsr1	0.793305	0.1117	-0.014189	0.00465131	0.61	0.623	1	0	0.0114007	0.0124384	0.0593363	0.0147907	0.671	0.6465	1	0	Incongruent	DU
ENSMUSG00000009207	Lnpk	0.401457	0.129111	-0.00112436	0.000794811	0.276	0.259	1	0	0.0575284	0.0953431	0.0246755	0.0159618	0.32	0.28525	1	0	Incongruent	DU
ENSMUSG00000009394	Syn2	0.213713	0.0112224	-0.00947987	0.000703302	0.674	0.7575	1	0	0.00563147	0.0107339	0.0891508	0.0160986	0.752	0.7465	1	0	Incongruent	DU
ENSMUSG00000009647	Mcu	8.0267e-05	4.98642e-06	0.0797643	0.00111878	0.347	0.2835	1	0	0.458115	0.319967	-0.0472085	0.0142381	0.331	0.338	1	0	Incongruent	UD
ENSMUSG00000010097	Nxf1	0.613002	0.135591	-0.0213009	0.00289401	0.103	0.1075	1	0	0.000725946	0.000755369	0.0526777	0.00767924	0.115	0.0845	1	0	Incongruent	DU
ENSMUSG00000010453	Kansl3	0.875392	0.164261	-0.00631069	0.0042203	0.135	0.1325	1	0	0.0566609	0.0488539	0.0279074	0.00875354	0.165	0.14225	1	0	Incongruent	DU
ENSMUSG00000010554	Mettl16	0.544475	0.0680767	-0.0115062	0.0057231	0.117	0.1235	1	0	0.377887	0.32795	0.00745464	0.0102161	0.133	0.12175	1	0	Incongruent	DU
ENSMUSG00000010803	Gabra1	0.000641576	0.000721509	0.0661672	0.00952772	0.183	0.1405	1	0	0.712046	0.21575	-0.00637036	0.00966166	0.182	0.18075	1	0	Incongruent	UD
ENSMUSG00000011158	Brf1	0.783222	0.194072	-0.0223098	0.00569382	0.113	0.113	1	0	0.1875	0.207858	0.0244263	0.0130777	0.111	0.09575	1	0	Incongruent	DU
ENSMUSG00000011960	Ccnt1	0.31566	0.116876	-0.0569126	0.00479656	0.169	0.178	1	0	0.218845	0.197359	0.0150748	0.0111681	0.202	0.18475	1	0	Incongruent	DU
ENSMUSG00000012114	Med15	0.465783	0.092781	-0.00583898	0.00183149	0.162	0.1505	1	0	0.0251047	0.0137626	0.0200412	0.00544318	0.187	0.16025	1	0	Incongruent	DU
ENSMUSG00000012117	Dhdds	0.381752	0.0403523	-0.0258224	0.00285754	0.116	0.1235	1	0	0.132987	0.129008	0.0130997	0.0156212	0.145	0.126	1	0	Incongruent	DU
ENSMUSG00000012422	Tmem167	0.410622	0.135512	-0.00968389	0.00546261	0.16	0.148	1	0	0.677949	0.273992	0.0149532	0.00773612	0.167	0.163	1	0	Incongruent	DU
ENSMUSG00000012535	Tnpo3	0.331902	0.078819	-0.0187437	0.00850121	0.212	0.1945	1	0	0.485133	0.344465	0.012156	0.0084647	0.235	0.226	1	0	Incongruent	DU
ENSMUSG00000013089	Etv5	0.000770973	0.000632895	0.0596644	0.00774735	0.189	0.146	1	0	0.453664	0.168427	-0.0067752	0.000470629	0.154	0.163	1	0	Incongruent	UD
ENSMUSG00000013495	Tmem175	0.322842	0.0691487	-0.00188615	0.00445088	0.188	0.172	1	0	0.130724	0.0509595	0.0208146	0.00528831	0.196	0.1785	1	0	Incongruent	DU
ENSMUSG00000013622	Atraid	0.782415	0.239125	-0.0366239	0.00767346	0.185	0.186	1	0	0.0828826	0.133346	0.0252912	0.0112456	0.186	0.16125	1	0	Incongruent	DU
ENSMUSG00000013663	Pten	0.0822912	0.0184632	0.0448838	0.00253381	0.564	0.543	1	0	0.0278343	0.011579	-0.0688163	0.0134049	0.614	0.64325	1	0	Incongruent	UD
ENSMUSG00000013701	Timm23	0.786338	0.221646	0.0102661	0.0038844	0.112	0.1095	1	0	0.48968	0.355451	-0.00032878	0.0159932	0.123	0.11375	1	0	Incongruent	UD
ENSMUSG00000013921	Clip3	0.563915	0.201919	-0.000677936	0.00482108	0.112	0.105	1	0	0.0113403	0.0122875	0.0339842	0.00968041	0.119	0.093	1	0	Incongruent	DU
ENSMUSG00000014077	Chp1	0.637908	0.316722	-0.0169033	0.00630766	0.101	0.1055	1	0	0.0404401	0.0218546	0.033835	0.00602677	0.117	0.098	1	0	Incongruent	DU
ENSMUSG00000014353	Tmem87b	0.206804	0.0412681	-0.03635	0.00320152	0.136	0.149	1	0	0.0304276	0.0197281	0.0192148	0.00705107	0.164	0.14025	1	0	Incongruent	DU
ENSMUSG00000014418	Hps5	0.75353	0.0786053	-0.00548019	0.00677836	0.108	0.109	1	0	0.366832	0.209029	0.016162	0.00916512	0.124	0.1155	1	0	Incongruent	DU
ENSMUSG00000014426	Map3k4	0.78639	0.0712714	-0.00570361	0	0.174	0.1695	1	0	0.220683	0.383416	0.0204132	0.0188187	0.23	0.20725	1	0	Incongruent	DU
ENSMUSG00000014592	Camta1	0.0581423	0.00442011	-0.0085218	0.00100136	0.621	0.6945	1	0	0.274483	0.133497	0.00940134	0.0250796	0.691	0.7245	1	0	Incongruent	DU
ENSMUSG00000014932	Yes1	0.0872885	0.0137769	0.025571	0.000960131	0.131	0.1125	1	0	0.660367	0.129796	-0.00258174	0.00995276	0.118	0.11975	1	0	Incongruent	UD
ENSMUSG00000014959	Gorasp2	0.86742	0.0896282	-0.0114087	0.00283635	0.128	0.128	1	0	0.311984	0.205103	0.00762132	0.00685129	0.144	0.1325	1	0	Incongruent	DU
ENSMUSG00000015214	Mtmr1	0.686566	0.10916	-0.00642508	0.00475188	0.201	0.1935	1	0	7.95385e-07	1.2627e-06	0.0933427	0.00981527	0.251	0.18425	0.0227925	0.036184	Incongruent	DU
ENSMUSG00000015501	Hivep2	1.90033e-17	1.19248e-17	0.193449	0.0014212	0.946	0.9425	4.71967e-13	2.96164e-13	0.175984	0.115199	-0.00496852	0.0116245	0.961	0.96475	1	0	Incongruent	UD
ENSMUSG00000015671	Psma2	0.361436	0.00933373	0.00377367	0.00242833	0.116	0.106	1	0	0.739407	0.258058	-0.00704367	0.0091017	0.11	0.10625	1	0	Incongruent	UD
ENSMUSG00000015748	Prpf3	0.744941	0.0821629	-0.0132498	0.00177647	0.18	0.175	1	0	4.49238e-08	5.3369e-08	0.0930809	0.0193706	0.219	0.14775	0.00128734	0.00152934	Incongruent	DU
ENSMUSG00000015755	Tab2	0.751042	0.260069	-0.0502325	0.0128473	0.221	0.2215	1	0	0.261368	0.168343	0.00338974	0.0129078	0.27	0.2515	1	0	Incongruent	DU
ENSMUSG00000015889	Lta4h	0.754771	0.322953	-0.0186884	0.00968275	0.141	0.1425	1	0	0.00510228	0.00786384	0.03529	0.00795629	0.138	0.10725	1	0	Incongruent	DU
ENSMUSG00000015937	Macroh2a1	0.886355	0.0766562	-0.0118572	0.00185564	0.144	0.1435	1	0	0.000255828	0.000436232	0.0716485	0.00774638	0.167	0.12675	0.795406	0.409188	Incongruent	DU
ENSMUSG00000016150	Tenm1	1.65607e-07	3.66988e-08	-0.112551	0.00323957	0.557	0.6815	0.00411302	0.000911451	0.658698	0.145155	0.0511258	0.010516	0.677	0.71325	1	0	Incongruent	DU
ENSMUSG00000016921	Srsf6	0.316494	0.0149075	-0.0202127	0.00177416	0.175	0.1585	1	0	0.000978144	0.00141182	0.0532709	0.0102091	0.196	0.154	0.757979	0.334384	Incongruent	DU
ENSMUSG00000017677	Wsb1	0.121855	0.036771	-0.0859915	0.00516527	0.254	0.267	1	0	1.10949e-07	2.21304e-07	0.154417	0.0200001	0.326	0.2495	0.00317934	0.00634168	Incongruent	DU
ENSMUSG00000017686	Rhot1	0.725078	0.277091	-0.0404713	0.00168479	0.198	0.198	1	0	0.000155626	0.000187098	0.0653788	0.00528888	0.244	0.19575	0.873564	0.252873	Incongruent	DU
ENSMUSG00000017843	Ppp2r5c	0.00311091	0.00120864	0.0352676	0	0.322	0.272	1	0	0.529733	0.364911	-0.0142456	0.0219758	0.347	0.3295	1	0	Incongruent	UD
ENSMUSG00000018001	Cyth3	0.242026	0.130531	-0.0248981	0.00717569	0.102	0.1145	1	0	0.064245	0.116354	0.0383215	0.0124826	0.134	0.11175	1	0	Incongruent	DU
ENSMUSG00000018076	Med13l	0.0035088	0.00384507	0.0361391	0.0144204	0.387	0.331	1	0	0.550952	0.312414	-0.00582511	0.0178359	0.469	0.457	1	0	Incongruent	UD
ENSMUSG00000018160	Med1	0.629272	0.0855794	-0.0049485	0.00326147	0.142	0.135	1	0	0.0770499	0.0679648	0.0232332	0.0082317	0.155	0.13525	1	0	Incongruent	DU
ENSMUSG00000018209	Stk4	0.0158413	0.00514477	0.0397997	0.00243878	0.129	0.103	1	0	0.423928	0.1583	-0.0171074	0.00602107	0.116	0.12375	1	0	Incongruent	UD
ENSMUSG00000018334	Ksr1	0.20051	0.0310833	-0.0452224	0.00223274	0.134	0.1475	1	0	0.00764388	0.0135706	0.0406412	0.0125842	0.164	0.13125	1	0	Incongruent	DU
ENSMUSG00000018372	Cep95	0.718982	0.0516302	-0.00755879	0	0.105	0.1085	1	0	0.0213587	0.0179052	0.0209861	0.00475311	0.122	0.09925	1	0	Incongruent	DU
ENSMUSG00000018395	Kif3a	0.900356	0.0959148	-0.0519558	0.000398726	0.237	0.228	1	0	0.00684386	0.00662004	0.048119	0.0206978	0.267	0.225	0.796677	0.406645	Incongruent	DU
ENSMUSG00000018398	Septin8	0.0254589	0.00657647	-0.0803404	0.00133149	0.126	0.1485	1	0	0.141366	0.0636745	0.0251817	0.00698837	0.15	0.134	1	0	Incongruent	DU
ENSMUSG00000018583	G3bp1	0.820378	0.015971	-0.00575828	0.00239077	0.119	0.121	1	0	0.207284	0.0938537	0.01901	0.00422122	0.134	0.1215	1	0	Incongruent	DU
ENSMUSG00000018697	Aatf	0.916613	0.115631	-0.0121249	0.000461497	0.144	0.1425	1	0	0.0420716	0.0342345	0.0296766	0.00551295	0.177	0.1525	1	0	Incongruent	DU
ENSMUSG00000018796	Acsl1	0.374901	0.0608012	-0.0417204	0.00418758	0.126	0.134	1	0	0.00539491	0.00524516	0.0419796	0.00807111	0.16	0.13	1	0	Incongruent	DU
ENSMUSG00000019146	Cacng2	0.0198098	0.0132067	0.040563	0.0071589	0.215	0.184	1	0	0.697862	0.227664	-0.0148877	0.0055017	0.195	0.19775	1	0	Incongruent	UD
ENSMUSG00000019699	Akt3	0.12042	0.0435929	0.0237779	0.00048207	0.882	0.9315	1	0	0.763586	0.351091	-0.0155174	0.0137368	0.919	0.933	1	0	Incongruent	UD
ENSMUSG00000019792	Trmt11	0.406993	0.145272	0.00603842	0.00190147	0.132	0.122	1	0	0.818513	0.153668	-0.010775	0.00534416	0.13	0.128	1	0	Incongruent	UD
ENSMUSG00000019802	Sec63	0.640651	0.0735	-0.0101964	0.00287421	0.228	0.2195	1	0	0.180681	0.0975477	0.0107257	0.00618484	0.253	0.23475	1	0	Incongruent	DU
ENSMUSG00000019813	Cep57l1	0.459258	0.0216268	-0.0103518	0	0.102	0.1095	1	0	0.179709	0.0917702	0.0188304	0.00462861	0.128	0.11425	1	0	Incongruent	DU
ENSMUSG00000019843	Fyn	0.199967	0.0546074	0.010459	0.00390559	0.285	0.2585	1	0	0.655963	0.221632	-0.0193501	0.0180024	0.296	0.29	1	0	Incongruent	UD
ENSMUSG00000019854	Reps1	0.135592	0.101342	0.0188374	0.00705331	0.142	0.1235	1	0	0.696745	0.168694	-0.0163917	0.0128841	0.168	0.16225	1	0	Incongruent	UD
ENSMUSG00000019970	Sgk1	0.35217	0.0946665	-0.163726	0.00675936	0.449	0.4295	1	0	0.000574037	0.00113834	0.132639	0.0270488	0.495	0.42675	0.354768	0.455135	Incongruent	DU
ENSMUSG00000020024	Cep83	3.96156e-06	1.78236e-06	0.0967087	0	0.287	0.2215	0.0983894	0.0442668	0.751474	0.188429	-0.0178754	0.0099208	0.296	0.2905	1	0	Incongruent	UD
ENSMUSG00000020102	Slc16a7	0.75079	0.312412	-0.0387299	0.00914929	0.218	0.208	1	0	0.140293	0.0858977	0.0188832	0.00963776	0.267	0.2445	1	0	Incongruent	DU
ENSMUSG00000020111	Micu1	0.00621066	0.00566488	0.042741	0.00504189	0.257	0.2135	1	0	0.529422	0.130598	-0.0265895	0.0126709	0.261	0.26325	1	0	Incongruent	UD
ENSMUSG00000020114	Cand1	0.849805	0.0194244	-0.00696805	0.0029498	0.1	0.099	1	0	0.297732	0.251968	0.0122004	0.00995152	0.122	0.11	1	0	Incongruent	DU
ENSMUSG00000020121	Srgap1	0.0189177	0.00898665	0.0189756	0.00949671	0.566	0.514	1	0	0.165446	0.126391	-0.0754045	0.0114361	0.532	0.53525	1	0	Incongruent	UD
ENSMUSG00000020124	Usp15	7.61718e-05	5.5537e-05	0.0621882	0.0135258	0.406	0.3335	0.95824	0.0590577	0.186219	0.154968	-0.0580721	0.00531764	0.437	0.4455	1	0	Incongruent	UD
ENSMUSG00000020130	Tbc1d15	0.031411	0.0211105	0.0308737	0.00446234	0.11	0.089	1	0	0.491977	0.0877635	-0.00547301	0.0119235	0.122	0.1215	1	0	Incongruent	UD
ENSMUSG00000020173	Cobl	0.000775122	0.000671008	0.056923	0.0116215	0.363	0.3005	1	0	0.0122897	0.00517179	-0.0877585	0.00198242	0.562	0.59	1	0	Incongruent	UD
ENSMUSG00000020189	Osbpl8	4.37394e-23	1.53785e-24	0.297979	0.00524407	0.862	0.847	1.08631e-18	3.81941e-20	0.192654	0.15535	-0.014705	0.0215587	0.882	0.88825	1	0	Incongruent	UD
ENSMUSG00000020230	Prmt2	0.332795	0.168637	-0.00241873	0.00244228	0.101	0.0905	1	0	0.0107867	0.0129589	0.0367703	0.00719317	0.11	0.08525	1	0	Incongruent	DU
ENSMUSG00000020257	Wdr82	0.0806625	0.0188881	0.0294279	0.00236198	0.151	0.13	1	0	0.623044	0.0761966	-0.00704669	0.0108586	0.136	0.1325	1	0	Incongruent	UD
ENSMUSG00000020273	Papolg	0.528178	0.271348	-0.00206936	0.0058657	0.105	0.097	1	0	0.00606446	0.0040271	0.0390905	0.00615124	0.139	0.1115	1	0	Incongruent	DU
ENSMUSG00000020280	Pus10	0.196504	0.0948072	0.0109895	0.00458697	0.17	0.1525	1	0	0.551103	0.197568	-0.0136165	0.0054367	0.184	0.1745	1	0	Incongruent	UD
ENSMUSG00000020290	Xpo1	0.792627	0.264789	-0.0170756	0.0105409	0.208	0.2015	1	0	0.000116792	7.85809e-05	0.085569	0.00854851	0.243	0.19675	0.846945	0.30611	Incongruent	DU
ENSMUSG00000020331	Hcn2	0.0160137	0.0156562	-0.0778158	0.00465818	0.094	0.1165	1	0	0.353718	0.367077	0.00989912	0.0138056	0.106	0.095	1	0	Incongruent	DU
ENSMUSG00000020349	Ppp2ca	1.4049e-05	1.54952e-05	0.138464	0.00635603	0.266	0.205	0.348921	0.384839	0.272977	0.219519	-0.00901404	0.0167534	0.262	0.239	1	0	Incongruent	UD
ENSMUSG00000020354	Sgcd	0.147316	0.0238957	-0.0662047	0.00318495	0.61	0.6735	1	0	0.535997	0.218101	0.0241754	0.0277639	0.675	0.6995	1	0	Incongruent	DU
ENSMUSG00000020362	Cnot6	0.736314	0.0846345	-0.00529416	0.00842708	0.139	0.1395	1	0	0.0484757	0.0625168	0.0279607	0.0130751	0.164	0.1385	1	0	Incongruent	DU
ENSMUSG00000020366	Mapk9	0.665371	0.0793812	-0.0241596	0.000915745	0.152	0.156	1	0	0.392757	0.383758	0.0102328	0.0130227	0.167	0.15575	1	0	Incongruent	DU
ENSMUSG00000020390	Ube2b	0.241968	0.0733857	0.0239644	0.00423588	0.58	0.574	1	0	0.143791	0.019852	-0.0245791	0.00280758	0.622	0.6555	1	0	Incongruent	UD
ENSMUSG00000020463	Ppp4r3b	0.671935	0.105758	-0.0217481	0	0.239	0.228	1	0	0.104756	0.0702397	0.013207	0.00741276	0.297	0.27225	1	0	Incongruent	DU
ENSMUSG00000020516	Rps6kb1	0.0883778	0.0247793	-0.0142651	0.00223063	0.321	0.285	1	0	0.123752	0.154435	0.0243173	0.018563	0.348	0.317	1	0	Incongruent	DU
ENSMUSG00000020530	Ggnbp2	0.198501	0.0889763	-0.0208007	0.00189652	0.309	0.281	1	0	0.00179296	0.0018938	0.0511151	0.0113148	0.383	0.32775	1	0	Incongruent	DU
ENSMUSG00000020564	Atxn7l1	0.0407708	0.0328102	0.0222967	0.00973786	0.242	0.209	1	0	0.627694	0.0981912	-0.00703394	0.0144665	0.283	0.2745	1	0	Incongruent	UD
ENSMUSG00000020580	Rock2	0.933582	0.0167644	0.0274352	0.000979256	0.695	0.741	1	0	0.250047	0.232442	-0.0270948	0.016013	0.715	0.755	1	0	Incongruent	UD
ENSMUSG00000020585	Laptm4a	0.855951	0.121573	-0.0187838	0.00602127	0.123	0.12	1	0	0.401855	0.123118	0.00282832	0.0138785	0.103	0.09825	1	0	Incongruent	DU
ENSMUSG00000020608	Smc6	0.151445	0.0775944	0.0143587	0.0044354	0.19	0.1695	1	0	0.649856	0.206779	-0.0114682	0.0124762	0.201	0.19825	1	0	Incongruent	UD
ENSMUSG00000020620	Abca8b	0.736718	0.00955646	-0.0443894	0.0052248	0.16	0.161	1	0	0.0483708	0.0642201	0.029138	0.0106629	0.206	0.17875	1	0	Incongruent	DU
ENSMUSG00000020642	Rnf144a	0.950893	0.0635105	-0.020923	0.00189529	0.11	0.1095	1	0	0.0636747	0.050526	0.014767	0.00403262	0.133	0.1125	1	0	Incongruent	DU
ENSMUSG00000020668	Kif3c	0.727577	0.0154412	-0.0162126	0.00273618	0.147	0.15	1	0	0.188141	0.189486	0.00520541	0.0146769	0.184	0.1665	1	0	Incongruent	DU
ENSMUSG00000020687	Cdc27	0.00443292	0.00145814	0.051588	0.00357944	0.205	0.169	1	0	0.411289	0.257202	-0.00173531	0.0101907	0.212	0.19925	1	0	Incongruent	UD
ENSMUSG00000020694	Tlk2	0.68524	0.0235854	-0.00949358	0.00202771	0.255	0.245	1	0	0.00210585	0.00221349	0.0607159	0.0063263	0.319	0.27625	1	0	Incongruent	DU
ENSMUSG00000020697	Lig3	0.244927	0.0694935	-0.0027361	0.00483938	0.114	0.1	1	0	0.0275262	0.0157069	0.0263848	0.00460146	0.113	0.093	1	0	Incongruent	DU
ENSMUSG00000020700	Map3k3	0.681111	0.0395057	-0.000808131	0.00267002	0.29	0.279	1	0	0.208192	0.347783	0.014767	0.023776	0.339	0.3075	1	0	Incongruent	DU
ENSMUSG00000020704	Asic2	0.802697	0.132823	-0.000902071	0.0152472	0.764	0.8395	1	0	0.701576	0.171015	0.01301	0.0193601	0.85	0.89025	1	0	Incongruent	DU
ENSMUSG00000020705	Ddx42	0.364139	0.185956	-0.00855275	0.00862702	0.21	0.1935	1	0	0.124586	0.104858	0.0172271	0.00619366	0.229	0.20725	1	0	Incongruent	DU
ENSMUSG00000020738	Sumo2	0.825786	0.171304	-0.00197313	0.00559237	0.135	0.132	1	0	0.0304085	0.0215061	0.0314628	0.00807176	0.151	0.1285	1	0	Incongruent	DU
ENSMUSG00000020770	Unk	0.397018	0.0137277	-0.0405398	0.000459626	0.133	0.1395	1	0	0.00928602	0.0126566	0.0321233	0.0165067	0.134	0.104	0.912939	0.174121	Incongruent	DU
ENSMUSG00000020794	Ube2g1	0.174736	0.0131236	-0.0180096	0.00178253	0.332	0.3005	1	0	0.00734374	0.00669718	0.0498445	0.017899	0.357	0.31125	1	0	Incongruent	DU
ENSMUSG00000020840	Blmh	0.642869	0.219508	-0.021057	0.0051629	0.129	0.1325	1	0	0.5212	0.298611	0.00544112	0.00975954	0.141	0.1335	1	0	Incongruent	DU
ENSMUSG00000020863	Luc7l3	0.674493	0.0650411	-0.0293782	0	0.403	0.385	1	0	0.00603081	0.00611094	0.0743553	0.0130972	0.486	0.44175	1	0	Incongruent	DU
ENSMUSG00000020883	Fbxl20	0.420788	0.0808616	-0.00804867	0.00126125	0.231	0.217	1	0	0.579676	0.362392	0.00527901	0.00725694	0.264	0.25325	1	0	Incongruent	DU
ENSMUSG00000020903	Stx8	0.047338	0.0358278	-0.045662	0.00755827	0.147	0.1705	1	0	0.183124	0.127112	0.00317838	0.0146028	0.197	0.178	1	0	Incongruent	DU
ENSMUSG00000020962	Gtf2a1	0.0955569	0.0215286	-0.0421011	0.00409421	0.133	0.151	1	0	0.00530679	0.00541254	0.0551217	0.0154092	0.18	0.14475	0.762646	0.474707	Incongruent	DU
ENSMUSG00000020982	Nemf	0.55834	0.199799	-0.041416	0.00623178	0.218	0.222	1	0	0.00148807	0.000742497	0.0552615	0.00135918	0.26	0.21825	1	0	Incongruent	DU
ENSMUSG00000020986	Sec23a	0.07591	0.00548481	-0.00462297	0	0.148	0.1255	1	0	0.340702	0.427435	0.0122949	0.0117424	0.157	0.145	1	0	Incongruent	DU
ENSMUSG00000020994	Pnn	0.745526	0.0276196	-0.0286942	0.0026787	0.162	0.1635	1	0	0.0811145	0.0535063	0.0226322	0.0088907	0.181	0.16025	1	0	Incongruent	DU
ENSMUSG00000021027	Ralgapa1	0.00269192	2.73231e-05	-0.0641565	0.00102475	0.777	0.866	1	0	0.257978	0.212296	0.0220958	0.0203929	0.857	0.869	1	0	Incongruent	DU
ENSMUSG00000021028	Mbip	0.309342	0.0347058	-0.00958193	0.00122785	0.242	0.222	1	0	0.0413275	0.0346903	0.0276131	0.0164826	0.278	0.2465	1	0	Incongruent	DU
ENSMUSG00000021065	Fut8	0.0919886	0.0586356	0.0430595	0.00932705	0.524	0.4995	1	0	0.0303034	0.0253136	-0.0698924	0.0117365	0.597	0.6255	1	0	Incongruent	UD
ENSMUSG00000021071	Trim9	0.000177233	3.85799e-05	0.116266	0.00299527	0.721	0.7365	1	0	0.498381	0.255829	-0.00849059	0.00541806	0.741	0.7795	1	0	Incongruent	UD
ENSMUSG00000021103	Mnat1	0.0305884	0.0251604	0.0232449	0.00969261	0.274	0.237	1	0	0.604693	0.36868	-0.0282476	0.0192921	0.289	0.28775	1	0	Incongruent	UD
ENSMUSG00000021111	Papola	0.49769	0.181251	0.0182246	0.00447103	0.523	0.522	1	0	0.189899	0.0845777	-0.0364403	0.00376649	0.619	0.63375	1	0	Incongruent	UD
ENSMUSG00000021134	Srsf5	0.0338661	0.0238262	-0.0687536	0.006517	0.686	0.7405	1	0	7.68174e-05	7.2803e-05	0.100258	0.00763505	0.687	0.656	0.808226	0.306599	Incongruent	DU
ENSMUSG00000021171	Esyt2	0.0343403	0.000350566	0.0460155	0.000319442	0.483	0.4475	1	0	0.766532	0.224128	-0.0206591	0.00548917	0.568	0.57075	1	0	Incongruent	UD
ENSMUSG00000021178	Psmc1	0.927381	7.89867e-05	-0.0133216	0.00144257	0.111	0.111	1	0	0.115066	0.110214	0.00943414	0.00795177	0.119	0.102	1	0	Incongruent	DU
ENSMUSG00000021189	Atxn3	0.0942356	0.0309015	-0.0303561	0.00461811	0.133	0.1515	1	0	0.00110802	0.00162998	0.056985	0.00700829	0.187	0.15025	1	0	Incongruent	DU
ENSMUSG00000021218	Gdi2	0.121547	0.0573815	-0.0476021	0.00643913	0.132	0.148	1	0	0.0513535	0.0448386	0.0178599	0.00548935	0.17	0.14575	1	0	Incongruent	DU
ENSMUSG00000021219	Rgs6	2.05947e-05	2.68259e-06	0.152898	0.0122864	0.188	0.1345	0.511491	0.0666248	0.40251	0.369866	-0.0460415	0.0338075	0.306	0.32725	1	0	Incongruent	UD
ENSMUSG00000021244	Ylpm1	0.144968	0.0675566	-0.0373227	0.00502598	0.628	0.672	1	0	0.628461	0.222587	0.00296351	0.0117404	0.722	0.72825	1	0	Incongruent	DU
ENSMUSG00000021264	Yy1	0.602945	0.0680584	-0.0100535	0.000944574	0.133	0.126	1	0	0.332023	0.400556	0.0192021	0.0189527	0.132	0.12025	1	0	Incongruent	DU
ENSMUSG00000021302	Ggps1	0.690832	0.157389	-0.00505013	0.00332835	0.124	0.118	1	0	0.0878431	0.0930177	0.0224324	0.0064918	0.15	0.13	1	0	Incongruent	DU
ENSMUSG00000021313	Ryr2	0.870659	0.142857	0.0320102	0.0066647	0.737	0.8165	1	0	0.424622	0.13444	-0.0217378	0.0106736	0.781	0.82725	1	0	Incongruent	UD
ENSMUSG00000021338	Carmil1	0.320653	0.00742312	-0.0167906	0.000400133	0.251	0.231	1	0	0.130046	0.149019	0.0445579	0.0209344	0.254	0.23	1	0	Incongruent	DU
ENSMUSG00000021385	Ippk	0.426604	0.103291	-0.0161225	0.00241225	0.107	0.115	1	0	0.0069215	0.0081889	0.0405373	0.0148543	0.141	0.11075	0.802104	0.395793	Incongruent	DU
ENSMUSG00000021391	Cenpp	0.40609	0.0277575	-0.0440117	0.00287363	0.094	0.101	1	0	0.378284	0.192382	0.00784978	0.00441202	0.103	0.09425	1	0	Incongruent	DU
ENSMUSG00000021413	Prpf4b	8.52616e-06	9.09287e-07	-0.132091	0.00199675	0.744	0.835	0.211756	0.0225831	0.0871865	0.0848589	0.0394096	0.00844386	0.786	0.78175	1	0	Incongruent	DU
ENSMUSG00000021431	Snrnp48	0.261753	0.100049	0.00255242	0.00809282	0.167	0.152	1	0	0.541779	0.173723	-0.0143681	0.0099443	0.185	0.17925	1	0	Incongruent	UD
ENSMUSG00000021448	Shc3	0.0785796	0.00963706	0.0297299	0.000404576	0.273	0.247	1	0	0.0209643	0.0415697	-0.0927234	0.0260974	0.252	0.29225	0.764858	0.470284	Incongruent	UD
ENSMUSG00000021470	Ercc6l2	0.374078	0.12089	-0.00726839	0.00401367	0.172	0.159	1	0	0.346589	0.267306	0.0066284	0.0177657	0.198	0.18075	1	0	Incongruent	DU
ENSMUSG00000021501	Caml	0.512107	0.0281109	-0.0130984	0.0014185	0.129	0.1205	1	0	0.000810296	0.00136465	0.050857	0.0069125	0.15	0.11375	1	0	Incongruent	DU
ENSMUSG00000021519	Mterf3	0.741663	0.0196971	-0.0226614	0.000474594	0.122	0.1235	1	0	0.308656	0.418871	0.020817	0.0144987	0.139	0.125	1	0	Incongruent	DU
ENSMUSG00000021548	Ccnh	0.475165	0.215933	-0.00876312	0.00639588	0.22	0.207	1	0	0.00242305	0.0043104	0.0526512	0.0140658	0.261	0.2125	0.759105	0.481789	Incongruent	DU
ENSMUSG00000021549	Rasa1	0.151765	0.0693384	-0.0100152	0.00635603	0.344	0.31	1	0	0.234977	0.131736	0.0127532	0.00494662	0.379	0.35775	1	0	Incongruent	DU
ENSMUSG00000021557	Agtpbp1	0.00162843	0.000297037	0.0524676	0.0010744	0.377	0.3225	1	0	0.817311	0.0471829	-0.0217696	0.00908819	0.372	0.3625	1	0	Incongruent	UD
ENSMUSG00000021619	Atg10	0.025495	0.0185363	0.0149608	0.0065074	0.211	0.1775	1	0	0.321657	0.241686	-0.0440391	0.0136775	0.184	0.195	1	0	Incongruent	UD
ENSMUSG00000021635	Rad17	0.751258	0.0232027	-0.0141606	0.000948967	0.123	0.1265	1	0	0.476921	0.506674	0.0131618	0.0170355	0.144	0.132	1	0	Incongruent	DU
ENSMUSG00000021639	Gtf2h2	0.0631551	0.0362069	-0.010143	0.00446842	0.184	0.1565	1	0	0.0109876	0.00677512	0.0306389	0.00889726	0.198	0.1675	1	0	Incongruent	DU
ENSMUSG00000021661	Ankra2	0.744049	0.0633596	-0.00611969	0.00191936	0.114	0.1095	1	0	0.00272355	0.00171592	0.0352981	0.00549669	0.133	0.10375	1	0	Incongruent	DU
ENSMUSG00000021666	Gfm2	0.276033	0.00349394	-0.0077299	0.00363524	0.159	0.1435	1	0	0.00863796	0.00554725	0.0419625	0.00349118	0.176	0.14675	1	0	Incongruent	DU
ENSMUSG00000021669	Cert1	0.00150936	0.000982365	0.0583197	0.00207303	0.261	0.2145	1	0	0.48803	0.134444	-0.0184833	0.022459	0.266	0.2595	1	0	Incongruent	UD
ENSMUSG00000021690	Jmy	0.243793	0.143713	0.00362419	0.00605426	0.148	0.132	1	0	0.320998	0.207898	-0.0425309	0.0116776	0.155	0.164	1	0	Incongruent	UD
ENSMUSG00000021699	Pde4d	3.33957e-12	2.66744e-12	-0.232468	0.0241146	0.544	0.6975	8.29415e-08	6.62485e-08	0.140117	0.0678994	0.0289816	0.0118756	0.644	0.696	1	0	Incongruent	DU
ENSMUSG00000021700	Rab3c	0.000375147	0.000356683	0.0417154	0.00854823	0.368	0.304	1	0	0.750538	0.224334	-0.0442408	0.0139905	0.401	0.39425	1	0	Incongruent	UD
ENSMUSG00000021710	Nln	0.336533	0.0390108	-0.0294394	0.00236856	0.114	0.1225	1	0	0.0153617	0.00841476	0.0307573	0.00410488	0.144	0.1185	1	0	Incongruent	DU
ENSMUSG00000021712	Trim23	0.21176	0.101947	0.0109423	0.00611568	0.147	0.131	1	0	0.24794	0.245675	-0.00282132	0.0136196	0.166	0.15025	1	0	Incongruent	UD
ENSMUSG00000021713	Ppwd1	0.861313	0.164666	-0.0314257	0.00269166	0.157	0.156	1	0	0.012967	0.0113699	0.0147687	0.00859926	0.194	0.16125	1	0	Incongruent	DU
ENSMUSG00000021715	Cwc27	0.464477	0.117448	-0.0446095	0.0106308	0.222	0.2285	1	0	0.231673	0.104352	0.00249609	0.0103866	0.288	0.269	1	0	Incongruent	DU
ENSMUSG00000021719	Rgs7bp	0.218389	0.0429354	0.0510011	0.00315275	0.733	0.779	1	0	0.671719	0.303612	-0.00670238	0.0131887	0.801	0.82875	1	0	Incongruent	UD
ENSMUSG00000021725	Parp8	0.07134	0.029175	-0.08069	0.00115205	0.226	0.246	1	0	0.260591	0.299676	0.00514068	0.0244218	0.263	0.24125	1	0	Incongruent	DU
ENSMUSG00000021730	Hcn1	5.36107e-13	3.47083e-13	-0.200872	0.0259817	0.321	0.4495	1.33147e-08	8.62016e-09	0.0678692	0.0738732	0.0129363	0.0280733	0.511	0.56125	1	0	Incongruent	DU
ENSMUSG00000021754	Map3k1	0.784957	0.085978	-0.0123482	0.000966041	0.105	0.1015	1	0	0.373039	0.275785	0.0191983	0.00992724	0.1	0.09025	1	0	Incongruent	DU
ENSMUSG00000021767	Kat6b	0.0248332	0.0124584	0.0818476	0.00461173	0.653	0.65	1	0	0.420039	0.220167	-0.0141253	0.0180972	0.659	0.68275	1	0	Incongruent	UD
ENSMUSG00000021779	Thrb	0.000725354	0.000947324	0.095788	0.015606	0.721	0.736	1	0	0.625491	0.363337	-0.00800473	0.0136157	0.788	0.8315	1	0	Incongruent	UD
ENSMUSG00000021785	Ngly1	0.635996	0.231492	-0.00602179	0.00661817	0.129	0.122	1	0	0.0636693	0.0512488	0.0206529	0.00850043	0.171	0.14925	1	0	Incongruent	DU
ENSMUSG00000021819	Zswim8	0.548541	0.187745	-0.023749	0.00526072	0.187	0.1755	1	0	5.45833e-06	9.68655e-06	0.0759996	0.0130476	0.203	0.14925	0.156414	0.277578	Incongruent	DU
ENSMUSG00000021824	Ap3m1	0.381766	0.24679	-0.0443214	0.00919643	0.161	0.169	1	0	0.00189976	0.00205247	0.045152	0.011855	0.219	0.18025	1	0	Incongruent	DU
ENSMUSG00000021843	Ktn1	0.350638	0.12127	-0.0267691	0.00902574	0.679	0.7205	1	0	0.650634	0.248609	0.0103751	0.0113006	0.735	0.74025	1	0	Incongruent	DU
ENSMUSG00000021846	Peli2	0.752177	0.1243	-0.0131583	0.0133861	0.185	0.185	1	0	0.00208881	0.00346317	0.0587537	0.0128489	0.252	0.20525	0.823123	0.353754	Incongruent	DU
ENSMUSG00000021870	Slmap	0.00368873	0.00265249	0.0579653	0.00437141	0.545	0.497	1	0	0.30584	0.269912	-0.0353638	0.0169161	0.617	0.6425	1	0	Incongruent	UD
ENSMUSG00000021893	Capn7	0.00532118	0.000780761	0.0438784	0.00185311	0.175	0.141	1	0	0.756787	0.267852	-0.00481681	0.0114744	0.178	0.1745	1	0	Incongruent	UD
ENSMUSG00000021895	Arhgef3	0.802915	0.119414	-0.0143579	0.00763816	0.158	0.154	1	0	7.62159e-05	0.000114644	0.0849761	0.013624	0.206	0.156	0.52725	0.54767	Incongruent	DU
ENSMUSG00000021929	Kpna3	0.360878	0.0924026	-0.00842376	0.00779206	0.241	0.225	1	0	0.00479961	0.00417553	0.0516897	0.0101972	0.274	0.2345	1	0	Incongruent	DU
ENSMUSG00000021936	Mapk8	0.970007	0.0303091	0.00571603	0.000809956	0.256	0.2545	1	0	0.351406	0.125575	-0.00991003	0.0118907	0.315	0.294	1	0	Incongruent	UD
ENSMUSG00000021945	Zmym2	0.408711	0.168139	-0.0418349	0.0069106	0.553	0.581	1	0	0.570298	0.324015	0.00191733	0.00880159	0.61	0.607	1	0	Incongruent	DU
ENSMUSG00000021952	Xpo4	0.804107	0.146834	-0.0152999	0.00687274	0.15	0.1455	1	0	0.025308	0.0355889	0.0358883	0.0133061	0.187	0.16025	1	0	Incongruent	DU
ENSMUSG00000021962	Dcp1a	0.699381	0.00901118	-0.0154554	0.00144941	0.11	0.114	1	0	0.119343	0.0727311	0.0192881	0.00462656	0.127	0.11175	1	0	Incongruent	DU
ENSMUSG00000021978	Extl3	0.327208	0.00724329	-0.00868833	0.00188478	0.122	0.1095	1	0	0.158784	0.0818373	0.0262929	0.00459122	0.117	0.104	1	0	Incongruent	DU
ENSMUSG00000021982	Cdadc1	0.000606098	0.00033381	0.0512013	0.00595102	0.197	0.153	1	0	0.427946	0.321313	-0.00315431	0.0114239	0.183	0.1715	1	0	Incongruent	UD
ENSMUSG00000021983	Atp8a2	8.99905e-11	8.08193e-12	0.14546	0.00221609	0.398	0.294	2.235e-06	2.00723e-07	0.00481403	0.00264903	-0.057724	0.00938337	0.496	0.542	1	0	Incongruent	UD
ENSMUSG00000021987	Mtmr6	0.217663	0.0233321	-0.0103831	0.0031041	0.188	0.1695	1	0	0.14293	0.102221	0.0261984	0.00908894	0.193	0.17475	1	0	Incongruent	DU
ENSMUSG00000022019	Tdrd3	0.0238339	0.0179346	0.0374277	0.00950984	0.223	0.19	1	0	0.308333	0.381977	-0.0514156	0.0213835	0.234	0.24625	1	0	Incongruent	UD
ENSMUSG00000022020	Naa16	0.00130323	0.000747826	0.0497494	0.00303678	0.227	0.182	1	0	0.622214	0.128302	-0.0058995	0.00920496	0.217	0.2085	1	0	Incongruent	UD
ENSMUSG00000022052	Ppp2r2a	0.00745851	0.00634269	0.0533131	0.00698131	0.489	0.4295	1	0	0.609907	0.242141	-0.00331315	0.0113774	0.616	0.61325	1	0	Incongruent	UD
ENSMUSG00000022076	Klhl1	1.72965e-18	2.08924e-18	0.251463	0.00979341	0.308	0.1845	4.29577e-14	5.18884e-14	0.536458	0.229094	-0.00551986	0.0197373	0.241	0.2325	1	0	Incongruent	UD
ENSMUSG00000022108	Itm2b	0.0291497	0.0187521	-0.122118	0.0171672	0.577	0.596	1	0	0.612379	0.368774	0.0157175	0.0339903	0.531	0.51775	1	0	Incongruent	DU
ENSMUSG00000022112	Gpc5	0.0576799	0.00493232	-0.130558	0.0261952	0.162	0.135	1	0	0.00873015	0.0155602	0.0995162	0.0647889	0.15	0.118	1	0	Incongruent	DU
ENSMUSG00000022124	Fbxl3	0.514663	0.0455894	0.00462781	0.00187268	0.14	0.132	1	0	0.330318	0.151638	-0.0389456	0.0090998	0.144	0.1525	1	0	Incongruent	UD
ENSMUSG00000022185	Acin1	0.254334	0.0114523	-0.0246803	0.00235961	0.266	0.2405	1	0	0.00927301	0.0108337	0.0432729	0.0180304	0.304	0.2625	1	0	Incongruent	DU
ENSMUSG00000022186	Oxct1	0.0050847	0.00408859	0.0427222	0.00575873	0.406	0.354	1	0	0.0627542	0.0788662	-0.0723275	0.0201321	0.44	0.46325	1	0	Incongruent	UD
ENSMUSG00000022194	Pabpn1	0.080854	0.0331458	-0.0341075	0.0094389	0.63	0.684	1	0	3.83739e-09	6.83561e-09	0.157137	0.00945476	0.592	0.511	0.000109964	0.000195881	Incongruent	DU
ENSMUSG00000022201	Zfr	0.0988154	0.074195	-0.0643524	0.0119127	0.762	0.8445	1	0	0.122683	0.111604	0.042048	0.0164346	0.833	0.841	1	0	Incongruent	DU
ENSMUSG00000022255	Mtdh	0.00478419	6.43595e-05	0.0472576	0.00141539	0.381	0.3295	1	0	0.914105	0.0959659	-0.0148049	0.0136029	0.418	0.40875	1	0	Incongruent	UD
ENSMUSG00000022269	Marchf11	0.000575606	4.67649e-05	0.0692327	0	0.198	0.155	1	0	0.0107379	0.0171268	-0.0797311	0.0142784	0.181	0.2125	1	0	Incongruent	UD
ENSMUSG00000022305	Lrp12	0.00430647	0.00350664	0.0510709	0.00363039	0.193	0.1565	1	0	0.376774	0.0996492	-0.0165479	0.00514234	0.215	0.19925	1	0	Incongruent	UD
ENSMUSG00000022312	Eif3h	0.0420743	0.00807935	0.0177853	0.00238741	0.143	0.1185	1	0	0.829538	0.149897	-0.00896529	0.00545442	0.148	0.146	1	0	Incongruent	UD
ENSMUSG00000022340	Sybu	5.79538e-09	6.55618e-09	0.151908	0.00415677	0.434	0.3355	0.000143934	0.000162829	0.00377801	0.00338326	-0.072006	0.0132678	0.579	0.62575	1	0	Incongruent	UD
ENSMUSG00000022475	Hdac7	0.828544	0.165618	-0.0323928	0.00887693	0.108	0.107	1	0	0.00256197	0.00282112	0.0475987	0.00955722	0.116	0.08725	1	0	Incongruent	DU
ENSMUSG00000022476	Polr3h	0.787702	0.225209	-0.0076364	0.00421643	0.135	0.1365	1	0	0.280042	0.189194	0.0150455	0.00877977	0.136	0.125	1	0	Incongruent	DU
ENSMUSG00000022523	Fgf12	1.50209e-06	1.37221e-06	0.0247211	0.00169935	0.948	0.966	0.037306	0.0340802	0.0961595	0.0591879	-0.00105887	0.0104371	0.963	0.9715	1	0	Incongruent	UD
ENSMUSG00000022634	Yaf2	0.0815507	0.0555556	-0.0023035	0.00512517	0.149	0.126	1	0	0.309243	0.194108	0.0135736	0.0124353	0.15	0.137	1	0	Incongruent	DU
ENSMUSG00000022641	Bbx	4.11455e-08	1.00201e-08	0.140992	0	0.341	0.259	0.00102189	0.000248858	0.348516	0.3043	-0.00415036	0.0132133	0.338	0.31625	1	0	Incongruent	UD
ENSMUSG00000022663	Atg3	0.390947	0.177672	-0.00204622	0.00386051	0.118	0.1075	1	0	0.519271	0.364925	0.00066413	0.00850318	0.131	0.12275	1	0	Incongruent	DU
ENSMUSG00000022672	Prkdc	0.401676	0.224545	-0.0586505	0.0135542	0.225	0.2325	1	0	0.166304	0.230838	0.016021	0.0242984	0.264	0.239	1	0	Incongruent	DU
ENSMUSG00000022679	Mpv17l	0.508107	0.0732798	-0.0137977	0.0029133	0.102	0.108	1	0	0.224634	0.149013	0.0107557	0.00671736	0.13	0.1165	1	0	Incongruent	DU
ENSMUSG00000022685	Parn	0.0549061	0.00277987	0.0216126	0.00452792	0.183	0.157	1	0	0.59322	0.376691	-0.0364955	0.0123776	0.152	0.1555	1	0	Incongruent	UD
ENSMUSG00000022704	Qtrt2	0.795661	0.211676	-0.007436	0.00859673	0.121	0.1175	1	0	7.75142e-05	0.000152863	0.0708432	0.0122145	0.146	0.10025	0.273293	0.485132	Incongruent	DU
ENSMUSG00000022708	Zbtb20	0.712722	0.0513184	-0.0363745	0.0072292	0.86	0.8555	1	0	0.118449	0.0841882	0.00144705	0.0216399	0.863	0.885	1	0	Incongruent	DU
ENSMUSG00000022723	Crybg3	0.00776515	0.000115639	0.0248886	0.00046108	0.162	0.128	1	0	0.442858	0.234771	-0.00149004	0.00897054	0.144	0.13425	1	0	Incongruent	UD
ENSMUSG00000022749	Tbc1d23	0.899934	0.00473582	-0.0124514	0.00556169	0.202	0.201	1	0	0.127329	0.0936545	0.00493571	0.0109054	0.259	0.2355	1	0	Incongruent	DU
ENSMUSG00000022790	Igsf11	0.0502224	0.0455591	0.00442316	0.0131365	0.356	0.3115	1	0	0.378979	0.180039	-0.00152023	0.0116136	0.394	0.3695	1	0	Incongruent	UD
ENSMUSG00000022811	Zfp148	0.0116476	0.00668562	0.0320151	0.0052315	0.449	0.3975	1	0	0.0255638	0.0265946	-0.0554684	0.00476638	0.56	0.59675	1	0	Incongruent	UD
ENSMUSG00000022812	Gsk3b	0.898842	0.105716	0.0324114	0.00207556	0.726	0.784	1	0	0.067151	0.0725362	-0.0499281	0.013629	0.773	0.81125	1	0	Incongruent	UD
ENSMUSG00000022837	Iqcb1	0.485057	0.0918406	-0.00185981	0.00175282	0.195	0.1845	1	0	0.00433941	0.00362349	0.049118	0.0102687	0.232	0.197	1	0	Incongruent	DU
ENSMUSG00000022848	Slc49a4	0.720434	0.148197	-0.0116625	0.003866	0.108	0.1025	1	0	0.148897	0.204074	0.0234167	0.0092472	0.121	0.105	1	0	Incongruent	DU
ENSMUSG00000022855	Senp2	0.908987	0.0621162	-0.0330587	0.00302392	0.197	0.1925	1	0	0.0878237	0.0795861	0.0378314	0.0214788	0.216	0.192	1	0	Incongruent	DU
ENSMUSG00000022861	Dgkg	0.704406	0.019144	-0.0152667	0.00626678	0.16	0.155	1	0	0.208395	0.174645	0.0144784	0.0117744	0.201	0.18175	1	0	Incongruent	DU
ENSMUSG00000022914	Brwd1	0.849079	0.0979096	-0.044492	0.00655466	0.479	0.4685	1	0	0.159713	0.0937163	0.0421052	0.0091589	0.544	0.52375	1	0	Incongruent	DU
ENSMUSG00000022961	Son	0.0191665	0.000224116	-0.0945289	0.00584417	0.822	0.88	1	0	1.02774e-09	1.97572e-09	0.142738	0.0175664	0.882	0.84975	2.94509e-05	5.66162e-05	Incongruent	DU
ENSMUSG00000022974	Paxbp1	0.385445	0.031447	-0.0150144	0.00145682	0.333	0.3095	1	0	0.149663	0.0993894	0.0226041	0.0200246	0.407	0.3765	1	0	Incongruent	DU
ENSMUSG00000022983	Scaf4	0.3553	0.0955133	-0.00461375	0.00898447	0.253	0.235	1	0	0.0802254	0.132048	0.0268866	0.0128398	0.271	0.2405	1	0	Incongruent	DU
ENSMUSG00000023010	Tmbim6	0.234035	0.142284	-0.0188176	0.0121872	0.201	0.1785	1	0	0.00172668	0.002223	0.0430563	0.0140852	0.198	0.15575	0.771792	0.456415	Incongruent	DU
ENSMUSG00000023021	Cers5	0.534526	0.0536277	-0.03481	0.00265316	0.161	0.1655	1	0	0.0892521	0.110849	0.0235448	0.0201719	0.177	0.1535	1	0	Incongruent	DU
ENSMUSG00000023025	Larp4	0.911895	0.0590718	-0.0166181	0.00137454	0.149	0.1485	1	0	0.0270345	0.031214	0.0329162	0.013773	0.202	0.17225	1	0	Incongruent	DU
ENSMUSG00000023068	Nus1	0.000243906	0.000108435	0.048557	0.000997691	0.121	0.084	1	0	0.57006	0.289361	-0.00400644	0.0112874	0.131	0.128	1	0	Incongruent	UD
ENSMUSG00000023092	Fhl1	0.167936	0.141311	-0.00154479	0.00747036	0.19	0.1675	1	0	4.65239e-15	8.16406e-15	0.14109	0.0105991	0.236	0.144	1.33319e-10	2.33949e-10	Incongruent	DU
ENSMUSG00000023118	Sympk	0.658272	0.153711	-0.00981903	0.00401894	0.176	0.168	1	0	0.00031985	0.000610786	0.06169	0.0150643	0.192	0.1465	0.561477	0.395418	Incongruent	DU
ENSMUSG00000023286	Ube2j2	0.440432	0.0499284	-0.00237549	0.00239864	0.125	0.1155	1	0	0.00272093	0.00192924	0.0464573	0.00460587	0.134	0.10525	1	0	Incongruent	DU
ENSMUSG00000023912	Slc25a27	0.179388	0.00183563	-0.0889605	0.00225945	0.257	0.269	1	0	0.787262	0.197654	0.0121073	0.0135598	0.297	0.2925	1	0	Incongruent	DU
ENSMUSG00000023951	Vegfa	0.511073	0.0476261	-0.0572637	0.00267636	0.126	0.1315	1	0	1.14958e-05	2.23324e-05	0.0677872	0.0129791	0.119	0.0765	0.257106	0.495338	Incongruent	DU
ENSMUSG00000023977	Ubr2	0.211924	0.0136013	0.00725636	0.00790197	0.266	0.246	1	0	0.477045	0.151317	-0.0159136	0.00739217	0.302	0.284	1	0	Incongruent	UD
ENSMUSG00000024045	Akap8	0.814923	0.137371	-0.0157454	0.00340757	0.22	0.214	1	0	5.24107e-07	1.0388e-06	0.0892517	0.0118575	0.265	0.195	0.0150188	0.0297679	Incongruent	DU
ENSMUSG00000024054	Smchd1	0.908701	0.044813	-0.0238932	0.000394257	0.266	0.262	1	0	0.592818	0.308643	0.00341089	0.0119548	0.283	0.2755	1	0	Incongruent	DU
ENSMUSG00000024064	Galnt14	0.202658	0.0993194	0.0301013	0.00930831	0.173	0.157	1	0	0.485443	0.279251	-0.0204313	0.0167909	0.15	0.158	1	0	Incongruent	UD
ENSMUSG00000024085	Man2a1	1.1717e-13	1.52764e-13	0.179858	0.0105837	0.369	0.255	2.91003e-09	3.79404e-09	0.185615	0.22631	-0.0703773	0.0163851	0.323	0.33275	1	0	Incongruent	UD
ENSMUSG00000024096	Ralbp1	0.455688	0.24646	-0.0223307	0.00569912	0.109	0.117	1	0	0.248488	0.220596	0.0133774	0.0148083	0.139	0.12625	1	0	Incongruent	DU
ENSMUSG00000024104	Washc2	0.0422514	0.0370501	-0.0499353	0.00698888	0.107	0.129	1	0	0.153129	0.193843	0.0243152	0.0112976	0.139	0.12175	1	0	Incongruent	DU
ENSMUSG00000024109	Nrxn1	1.38916e-05	1.53676e-05	-0.0341411	0.0117102	0.977	0.9855	0.345012	0.381671	0.000315506	0.000312371	0.0775268	0.0215109	0.987	0.9895	1	0	Incongruent	DU
ENSMUSG00000024127	Prepl	0.00370571	0.000499157	0.0639125	0.00209088	0.27	0.2265	1	0	0.512593	0.117355	-0.0171038	0.00865238	0.301	0.30175	1	0	Incongruent	UD
ENSMUSG00000024143	Rhoq	0.874429	0.126137	-0.00430595	0.00421256	0.134	0.131	1	0	0.194764	0.0842242	0.00887213	0.0040523	0.142	0.12775	1	0	Incongruent	DU
ENSMUSG00000024172	St6gal2	0.00707923	0.00149643	0.0322733	0.000496297	0.116	0.0885	1	0	0.559381	0.335078	-0.00207489	0.0106843	0.124	0.11675	1	0	Incongruent	UD
ENSMUSG00000024182	Axin1	0.785005	0.00348652	-0.0175622	0.00145216	0.107	0.108	1	0	0.0162529	0.0149322	0.0355852	0.0079345	0.13	0.106	1	0	Incongruent	DU
ENSMUSG00000024222	Fkbp5	0.655788	0.328494	-0.0544266	0.0110585	0.131	0.1335	1	0	7.52484e-10	8.29685e-10	0.124199	0.00950228	0.174	0.11	2.15632e-05	2.37754e-05	Incongruent	DU
ENSMUSG00000024236	Svil	0.496857	0.219934	-0.0201527	0.00404372	0.149	0.14	1	0	0.156411	0.161844	0.00736449	0.0164059	0.14	0.12225	1	0	Incongruent	DU
ENSMUSG00000024238	Zeb1	1.38751e-05	1.07849e-05	0.0634079	0.00757801	0.803	0.834	0.344602	0.267854	0.835471	0.109844	-0.0408871	0.0107197	0.851	0.8565	1	0	Incongruent	UD
ENSMUSG00000024241	Sos1	0.0227104	0.00845144	0.037595	0.000828708	0.254	0.2195	1	0	0.679554	0.386768	-0.0329507	0.0119178	0.267	0.26925	1	0	Incongruent	UD
ENSMUSG00000024251	Thada	0.82128	0.223903	-0.0336717	0.00523046	0.239	0.2295	1	0	0.0525771	0.0401642	0.0196825	0.0127865	0.312	0.279	1	0	Incongruent	DU
ENSMUSG00000024259	Slc25a46	0.224683	0.186069	0.00852609	0.0102797	0.188	0.1685	1	0	0.463753	0.260408	-0.00103444	0.0113178	0.204	0.1935	1	0	Incongruent	UD
ENSMUSG00000024277	Mapre2	0.0157642	0.00301851	0.0115748	0.000782616	0.287	0.2465	1	0	0.259412	0.0745079	-0.045578	0.00607448	0.283	0.293	1	0	Incongruent	UD
ENSMUSG00000024350	Dnajc18	0.724301	0.0270945	-0.00194127	0.00550189	0.153	0.148	1	0	0.204561	0.192775	0.00569589	0.010755	0.174	0.15775	1	0	Incongruent	DU
ENSMUSG00000024424	Ttc39c	0.338017	0.099942	0.0133331	0.00568061	0.129	0.1185	1	0	0.491789	0.223583	-0.0012543	0.00144834	0.15	0.141	1	0	Incongruent	UD
ENSMUSG00000024431	Nr3c1	0.000758929	0.000999379	0.0372243	0.0174972	0.306	0.245	1	0	0.0119694	0.0116577	-0.0799627	0.0124088	0.278	0.30725	1	0	Incongruent	UD
ENSMUSG00000024487	Yipf5	0.298278	0.0863561	-0.0290597	0.00228577	0.135	0.1465	1	0	0.0112006	0.0136861	0.0372638	0.0163489	0.163	0.131	0.998995	0.00200995	Incongruent	DU
ENSMUSG00000024491	Rbm27	0.363889	0	-0.0134265	0	0.172	0.158	1	0	0.404291	0.341797	0.00746159	0.0233122	0.194	0.18325	1	0	Incongruent	DU
ENSMUSG00000024493	Lars	0.608992	0.0554166	-0.0261671	0.00043144	0.194	0.183	1	0	0.231247	0.106485	0.00889276	0.00345109	0.22	0.20325	1	0	Incongruent	DU
ENSMUSG00000024502	Jakmip2	0.163902	0.00498732	0.0367568	0.00259991	0.459	0.4385	1	0	0.00826006	0.00570892	-0.0529416	0.007997	0.576	0.62025	1	0	Incongruent	UD
ENSMUSG00000024507	Hsd17b4	0.01473	0.00394748	0.0326299	0.000491278	0.12	0.0945	1	0	0.426696	0.433598	-0.0281444	0.0150969	0.123	0.13275	1	0	Incongruent	UD
ENSMUSG00000024515	Smad4	0.0137701	0.00711117	0.0388858	0.00392513	0.293	0.2545	1	0	0.797676	0.157395	-0.0426531	0.0124167	0.301	0.29225	1	0	Incongruent	UD
ENSMUSG00000024530	Prelid3a	0.785786	0.274629	-0.00591796	0.00743613	0.148	0.1505	1	0	0.373374	0.257742	0.0115574	0.0108284	0.186	0.17375	1	0	Incongruent	DU
ENSMUSG00000024556	Me2	0.65839	0.0755277	-0.0036385	0.0098565	0.134	0.1285	1	0	0.252472	0.217825	0.0146494	0.00775639	0.136	0.1225	1	0	Incongruent	DU
ENSMUSG00000024563	Smad2	0.795964	0.105812	-0.0103914	0.00097621	0.102	0.099	1	0	0.450305	0.108897	0.00486359	0.00555154	0.123	0.11525	1	0	Incongruent	DU
ENSMUSG00000024588	Fech	0.0107672	0.000408007	0.0236977	0.00198761	0.105	0.079	1	0	0.774758	0.19971	-0.014804	0.00971678	0.1	0.10075	1	0	Incongruent	UD
ENSMUSG00000024608	Rps14	2.99566e-05	2.18187e-05	0.0616933	0.00489746	0.139	0.094	0.680413	0.451964	0.420921	0.154961	-0.0207453	0.00603135	0.111	0.1175	1	0	Incongruent	UD
ENSMUSG00000024642	Tle4	2.68461e-14	3.65622e-14	0.258042	0.0133724	0.768	0.7475	6.66749e-10	9.08058e-10	0.140324	0.0634741	-0.0865938	0.00993991	0.742	0.78075	1	0	Incongruent	UD
ENSMUSG00000024726	Carnmt1	0.594287	0.111325	-0.00203803	0.000960131	0.122	0.115	1	0	0.0128215	0.0161095	0.0305223	0.0106349	0.156	0.12675	1	0	Incongruent	DU
ENSMUSG00000024750	Zfand5	0.00193713	0.00202812	0.0407792	0.00660287	0.158	0.12	1	0	0.00317128	0.00404817	-0.0860067	0.00391266	0.154	0.18575	1	0	Incongruent	UD
ENSMUSG00000024811	Tnks2	0.0343411	0.0144608	0.0148339	0.00324369	0.264	0.229	1	0	0.779316	0.216476	-0.0167372	0.0151329	0.274	0.26925	1	0	Incongruent	UD
ENSMUSG00000024843	Chka	0.264409	0.064927	-0.0117234	0.00730184	0.301	0.2765	1	0	0.000230093	0.00045038	0.097696	0.0198243	0.381	0.3195	0.355835	0.465051	Incongruent	DU
ENSMUSG00000024921	Smarca2	0.685685	0.0050322	-0.0619325	0.000384451	0.256	0.253	1	0	0.207597	0.284189	0.00227497	0.0212582	0.328	0.29975	1	0	Incongruent	DU
ENSMUSG00000024969	Mark2	0.0373446	0.00366642	0.039931	0.000890045	0.531	0.4945	1	0	0.595482	0.246599	-0.016009	0.0183655	0.553	0.55	1	0	Incongruent	UD
ENSMUSG00000024974	Smc3	0.375195	0.0916322	-0.0543412	0.00718411	0.147	0.154	1	0	0.393136	0.120927	0.000866568	0.00740416	0.177	0.16475	1	0	Incongruent	DU
ENSMUSG00000024976	Shoc2	0.233854	0.157164	-0.0176469	0.00770243	0.205	0.184	1	0	0.201665	0.0249917	0.0112104	0.0064912	0.222	0.2045	1	0	Incongruent	DU
ENSMUSG00000024993	Dennd10	0.917943	0.00446473	-0.0195382	0.00337077	0.107	0.105	1	0	0.30738	0.138557	0.015833	0.00572095	0.122	0.1115	1	0	Incongruent	DU
ENSMUSG00000025025	Mxi1	0.417584	0.158832	-0.0387155	0.00771977	0.139	0.146	1	0	0.477544	0.303762	0.00458581	0.0160967	0.182	0.17275	1	0	Incongruent	DU
ENSMUSG00000025078	Nhlrc2	0.00477105	0.00518805	-0.0547569	0.0062927	0.079	0.106	1	0	0.169877	0.176206	0.0141767	0.0131687	0.103	0.08825	1	0	Incongruent	DU
ENSMUSG00000025085	Ablim1	0.486219	0.0382006	-0.0325714	0.00343771	0.173	0.1795	1	0	0.616913	0.191503	0.0111978	0.0171736	0.189	0.186	1	0	Incongruent	DU
ENSMUSG00000025103	Btbd1	0.4782	0.0399956	-0.0160118	0.00180157	0.168	0.156	1	0	0.101835	0.177825	0.0243208	0.0137211	0.204	0.1775	1	0	Incongruent	DU
ENSMUSG00000025137	Pcyt2	0.0435385	0.0135773	-0.120496	0.00767603	0.194	0.2145	1	0	0.0781831	0.0219744	0.00578121	0.00816018	0.202	0.179	1	0	Incongruent	DU
ENSMUSG00000025159	Mms19	0.6927	0.307794	-0.00510365	0.00432569	0.118	0.113	1	0	0.00595178	0.00700522	0.0467655	0.00934179	0.127	0.1	1	0	Incongruent	DU
ENSMUSG00000025178	Pi4k2a	0.736858	0.270388	-0.00169287	0.0072163	0.121	0.118	1	0	0.26686	0.212521	0.0144937	0.00894623	0.117	0.10575	1	0	Incongruent	DU
ENSMUSG00000025217	Btrc	0.00550366	0.00545831	0.0549845	0.0118678	0.47	0.4205	1	0	0.226088	0.170238	-0.0352135	0.0109944	0.571	0.5895	1	0	Incongruent	UD
ENSMUSG00000025224	Gbf1	0.0286541	0.00874132	0.0322555	0.00151244	0.325	0.289	1	0	0.188167	0.108749	-0.0123391	0.0109113	0.338	0.31125	1	0	Incongruent	UD
ENSMUSG00000025228	Actr1a	0.779462	0.0570888	-0.00380062	0.000487988	0.099	0.1015	1	0	0.0448093	0.0437379	0.0291882	0.00399167	0.114	0.09525	1	0	Incongruent	DU
ENSMUSG00000025246	Tbl1x	0.0841438	0.0573987	-0.000905897	0.0118355	0.384	0.3465	1	0	0.192901	0.235163	0.0116023	0.0195759	0.41	0.38175	1	0	Incongruent	DU
ENSMUSG00000025262	Fam120c	0.219233	0.0188926	-0.0178582	0.0048712	0.307	0.278	1	0	0.00196209	0.00127671	0.0580993	0.0104974	0.336	0.29225	1	0	Incongruent	DU
ENSMUSG00000025280	Polr3a	0.0790622	0.0368937	-0.0362147	0.00562062	0.117	0.1355	1	0	7.06023e-05	6.99646e-05	0.06736	0.0110004	0.161	0.11825	0.659251	0.471018	Incongruent	DU
ENSMUSG00000025314	Ptprj	0.705715	0.0831871	-0.0578161	0.000997691	0.369	0.351	1	0	0.275256	0.437551	0.0152783	0.0237668	0.514	0.499	1	0	Incongruent	DU
ENSMUSG00000025316	Banp	0.0142005	0.00288341	0.0418955	0.00184975	0.177	0.1475	1	0	0.603332	0.177861	-0.00738588	0.0116722	0.181	0.181	1	0	Incongruent	UD
ENSMUSG00000025323	Sp4	0.408081	0.135487	-0.0324466	0.00444894	0.163	0.171	1	0	0.207082	0.242088	0.004349	0.0128699	0.198	0.1795	1	0	Incongruent	DU
ENSMUSG00000025326	Ube3a	0.000340408	0.000140325	-0.0843357	0.00349821	0.762	0.8595	1	0	0.000356344	0.000670559	0.0919203	0.0150134	0.866	0.86025	0.704109	0.425911	Incongruent	DU
ENSMUSG00000025404	R3hdm2	0.185376	0.0849421	-0.00765904	0.00637676	0.588	0.629	1	0	0.895723	0.0584432	0.0114125	0.00564369	0.684	0.702	1	0	Incongruent	DU
ENSMUSG00000025413	Ttc4	0.480954	0.166546	-0.0137023	0.00583323	0.165	0.174	1	0	3.58962e-08	6.36209e-08	0.0961319	0.00776961	0.2	0.137	0.00102864	0.00182312	Incongruent	DU
ENSMUSG00000025439	Clns1a	0.669449	0.0589211	-0.0163096	0.000487988	0.102	0.0965	1	0	0.143284	0.0979827	0.0124566	0.00694035	0.102	0.0885	1	0	Incongruent	DU
ENSMUSG00000025477	Inpp5a	0.00399421	0.00197095	0.0399108	0.00181681	0.188	0.15	1	0	0.292806	0.10543	-0.00300599	0.00722732	0.189	0.175	1	0	Incongruent	UD
ENSMUSG00000025503	Taldo1	0.312666	0.0696308	-0.0532151	0.00369449	0.107	0.114	1	0	0.522592	0.240345	0.00941599	0.00375587	0.104	0.09775	1	0	Incongruent	DU
ENSMUSG00000025555	Farp1	0.0116219	0.0108975	-0.0748848	0.014526	0.149	0.1805	1	0	0.470949	0.190369	0.0565469	0.00479072	0.172	0.16575	1	0	Incongruent	DU
ENSMUSG00000025609	Mkln1	0.020339	0.0132219	0.0257964	0.00525756	0.363	0.315	1	0	0.383078	0.228132	-0.0127312	0.00960584	0.418	0.39025	1	0	Incongruent	UD
ENSMUSG00000025616	Usp16	0.994046	0.0083715	-0.0397396	0	0.217	0.212	1	0	0.000644171	0.000929687	0.0756641	0.00867797	0.244	0.1995	0.710636	0.342083	Incongruent	DU
ENSMUSG00000025630	Hprt	0.135868	0.0815433	-0.00959678	0.00305497	0.203	0.179	1	0	0.229226	0.14035	0.0150133	0.0101701	0.196	0.18125	1	0	Incongruent	DU
ENSMUSG00000025812	Pard3	0.00254894	0.000767424	0.0744868	0.00466884	0.811	0.812	1	0	0.424871	0.260274	-0.0277999	0.018132	0.826	0.84375	1	0	Incongruent	UD
ENSMUSG00000025816	Sec61a2	0.756465	0.0999612	-0.0324308	0.00426432	0.272	0.2705	1	0	0.0957422	0.17125	0.0235401	0.0215877	0.315	0.28	1	0	Incongruent	DU
ENSMUSG00000025873	Faf2	0.64258	0.324839	-0.00232511	0.00897143	0.133	0.1265	1	0	0.511259	0.36476	0.00209819	0.0137265	0.142	0.134	1	0	Incongruent	DU
ENSMUSG00000025878	Uimc1	0.109235	0.0117019	0.0204984	0.00638444	0.161	0.1405	1	0	0.550928	0.284987	-0.00433726	0.00486532	0.159	0.151	1	0	Incongruent	UD
ENSMUSG00000025892	Gria4	0.776662	0.149011	-0.0208228	0.0223006	0.851	0.908	1	0	0.579227	0.314737	0.0168013	0.0178088	0.894	0.91825	1	0	Incongruent	DU
ENSMUSG00000025898	Cwf19l2	0.783145	0.0838108	-0.0415918	0.00362395	0.147	0.146	1	0	0.444314	0.324938	0.000577926	0.01881	0.17	0.16025	1	0	Incongruent	DU
ENSMUSG00000025917	Cops5	0.194976	0.0261736	-0.061276	0.00134672	0.147	0.159	1	0	0.359752	0.381708	0.00673559	0.016304	0.158	0.14475	1	0	Incongruent	DU
ENSMUSG00000025939	Ube2w	0.00270405	0.00120309	0.0399738	0.00417546	0.332	0.28	1	0	0.365507	0.259408	-0.00402334	0.0113072	0.36	0.3365	1	0	Incongruent	UD
ENSMUSG00000025949	Pikfyve	0.73763	0.263501	-0.0116271	0.00714416	0.221	0.2135	1	0	0.0996912	0.0757573	0.00688617	0.00897351	0.262	0.2365	1	0	Incongruent	DU
ENSMUSG00000026005	Rpe	0.696689	0.0502186	0.00899309	0	0.104	0.1005	1	0	0.607882	0.309711	-0.00598898	0.0127831	0.12	0.12325	1	0	Incongruent	UD
ENSMUSG00000026034	Clk1	0.21662	0.0970377	-0.0486062	0.00952984	0.716	0.7555	1	0	0.0202534	0.0324	0.0557723	0.011858	0.75	0.7345	1	0	Incongruent	DU
ENSMUSG00000026103	Gls	0.357896	0.0381277	-0.00348435	0.00278288	0.776	0.8505	1	0	0.361236	0.234602	0.00857888	0.0226551	0.86	0.8795	1	0	Incongruent	DU
ENSMUSG00000026229	Psmd1	0.849608	0.200215	-0.0177184	0.00393286	0.191	0.1865	1	0	0.305408	0.149987	0.0131186	0.0094044	0.226	0.21075	1	0	Incongruent	DU
ENSMUSG00000026245	Farsb	0.439728	0.0846617	0.00870975	0.00137269	0.169	0.1595	1	0	0.735979	0.273705	-0.0160005	0.00539857	0.189	0.19225	1	0	Incongruent	UD
ENSMUSG00000026281	Dtymk	0.724491	0.112298	-0.0190803	0.00369784	0.141	0.134	1	0	0.00161644	0.00175329	0.0395021	0.00699455	0.145	0.112	1	0	Incongruent	DU
ENSMUSG00000026322	Htr4	0.933619	0.0792616	-0.0108275	0.00601308	0.118	0.1165	1	0	0.012683	0.0133236	0.042342	0.0123203	0.125	0.1	1	0	Incongruent	DU
ENSMUSG00000026349	Ccnt2	0.875198	0.124776	-0.0419126	0.0133208	0.304	0.2985	1	0	0.166611	0.150111	0.0118003	0.00682028	0.367	0.3385	1	0	Incongruent	DU
ENSMUSG00000026353	Ubxn4	0.631818	0.0213105	-0.0343298	0.00661893	0.225	0.2115	1	0	0.0667847	0.0920835	0.0235926	0.0190039	0.249	0.21925	1	0	Incongruent	DU
ENSMUSG00000026478	Lamc1	0.00550173	0.00487743	0.038593	0.00717668	0.235	0.193	1	0	0.485294	0.20563	-0.0133665	0.0115905	0.225	0.21225	1	0	Incongruent	UD
ENSMUSG00000026504	Sdccag8	0.0405445	0.00660792	0.0306317	0.000796051	0.295	0.261	1	0	0.440217	0.311331	-0.0189088	0.0193647	0.327	0.30575	1	0	Incongruent	UD
ENSMUSG00000026553	Copa	0.908205	0.0958496	-0.0315541	0.00353143	0.17	0.1685	1	0	0.0104528	0.0096668	0.0277894	0.00698293	0.189	0.1575	1	0	Incongruent	DU
ENSMUSG00000026568	Mpc2	0.163681	0.0435211	0.0171876	0.000978082	0.111	0.0965	1	0	0.610719	0.369342	-0.00167138	0.0138206	0.116	0.11275	1	0	Incongruent	UD
ENSMUSG00000026615	Eprs	0.413712	0.190953	-0.0156797	0.0127466	0.216	0.2	1	0	0.00149357	0.00205074	0.0647186	0.0116658	0.254	0.21275	1	0	Incongruent	DU
ENSMUSG00000026618	Iars2	0.707113	0.345406	-0.0127315	0.00630167	0.105	0.1085	1	0	0.0731728	0.0575125	0.0276343	0.0162635	0.126	0.10575	1	0	Incongruent	DU
ENSMUSG00000026721	Rabgap1l	0.962294	0.0209381	-0.0143094	0.000341298	0.846	0.9005	1	0	0.79713	0.137665	0.00293179	0.00895837	0.884	0.896	1	0	Incongruent	DU
ENSMUSG00000026740	Dnajc1	0.200615	0.0520298	0.000887527	0.00524494	0.645	0.7115	1	0	1.84071e-06	2.70798e-06	-0.108799	0.0138734	0.65	0.719	0.0527474	0.0775999	Incongruent	UD
ENSMUSG00000026753	Ppp6c	0.738196	0.27617	-0.0143973	0.00579078	0.106	0.1095	1	0	0.0662695	0.0770192	0.0278013	0.00876115	0.135	0.11425	1	0	Incongruent	DU
ENSMUSG00000026754	Golga1	0.513166	0.185113	-0.00810485	0.00411624	0.162	0.1525	1	0	0.382918	0.0540696	0.00846871	0.0054959	0.182	0.17125	1	0	Incongruent	DU
ENSMUSG00000026773	Pfkfb3	9.56379e-06	6.5885e-06	0.0617326	0.00326893	0.181	0.126	0.237526	0.163632	0.0402904	0.0302747	-0.0386653	0.00512678	0.114	0.1335	1	0	Incongruent	UD
ENSMUSG00000026799	Med27	0.415177	0.00254244	-0.00689536	0	0.188	0.1755	1	0	0.593694	0.406442	0.00228278	0.0238266	0.208	0.1995	1	0	Incongruent	DU
ENSMUSG00000026836	Acvr1	0.00780956	0.00467407	0.0389704	0.00455143	0.265	0.223	1	0	0.633722	0.270652	-0.0323593	0.0141531	0.237	0.2345	1	0	Incongruent	UD
ENSMUSG00000026914	Psmd14	5.25304e-05	3.87226e-05	0.0667474	0	0.349	0.2815	0.812306	0.26544	0.776543	0.301339	-0.0164253	0.014505	0.423	0.41125	1	0	Incongruent	UD
ENSMUSG00000026944	Abca2	0.0353114	0.0334911	-0.201506	0.0214631	0.223	0.239	1	0	0.120376	0.117895	0.0187989	0.02248	0.225	0.19875	1	0	Incongruent	DU
ENSMUSG00000026977	Marchf7	0.966573	0.00994306	-0.00712627	0.00251369	0.217	0.2155	1	0	0.0354872	0.0215056	0.0205904	0.00806504	0.285	0.2535	1	0	Incongruent	DU
ENSMUSG00000027002	Nckap1	0.110092	0.00737247	0.0625045	0.00299454	0.693	0.735	1	0	0.671987	0.189993	-0.00905842	0.0107361	0.757	0.7645	1	0	Incongruent	UD
ENSMUSG00000027010	Slc25a12	0.756428	0.095028	-0.043988	0.00318296	0.251	0.2495	1	0	0.0564495	0.099284	0.0245266	0.0159887	0.33	0.29225	1	0	Incongruent	DU
ENSMUSG00000027087	Itgav	0.0128278	0.0135186	0.0275651	0.0131051	0.236	0.196	1	0	0.675404	0.261584	-0.00633964	0.011582	0.207	0.19975	1	0	Incongruent	UD
ENSMUSG00000027099	Mtx2	0.0391213	0.0331062	0.0346735	0.00783387	0.229	0.1995	1	0	0.352419	0.35878	-0.00906314	0.0204854	0.248	0.229	1	0	Incongruent	UD
ENSMUSG00000027108	Ola1	0.0413913	0.0168964	0.0323948	0.00649359	0.223	0.1935	1	0	0.398075	0.228166	-0.00376937	0.0132665	0.258	0.243	1	0	Incongruent	UD
ENSMUSG00000027130	Slc12a6	0.602607	0.0857623	-0.0059678	0.00187182	0.143	0.135	1	0	0.312633	0.119966	0.0095971	0.00361864	0.146	0.13575	1	0	Incongruent	DU
ENSMUSG00000027195	Hsd17b12	0.193842	0.0321249	0.012262	0.000916567	0.158	0.1415	1	0	0.0722965	0.0448369	-0.0385899	0.00955272	0.135	0.15375	1	0	Incongruent	UD
[truncated: 740 more rows]

## Sheet: KO-2 unique
ensembl	gene	p_val.mean.KO-2	p_val.std.KO-2	avg_log2FC.mean.KO-2	avg_log2FC.std.KO-2	pct.1.mean.KO-2	pct.2.mean.KO-2	p_val_adj.mean.KO-2	p_val_adj.std.KO-2	p_val.mean.KO-1	p_val.std.KO-1	avg_log2FC.mean.KO-1	avg_log2FC.std.KO-1	pct.1.mean.KO-1	pct.2.mean.KO-1	p_val_adj.mean.KO-1	p_val_adj.std.KO-1	type	code
[truncated: 201 more rows]

[truncated: 1 more sheets: KO-1 unique]
